# Supplementary material
Source: PubMed Central journal article supplement (PMC3513571)
Supplement: NIHMS405391-supplement-01.pdf [file NIHMS405391-supplement-01.pdf]

| Protein Name                                       | Accession Numbers    | Sequence     | Prob | Ion Score | Identity Score | 11443 | 11444 | 11445 | 11446 | 11447 | 11448 | 11449 | 11450 | 11443 Raw | 11444 Raw | 11445 Raw | 11446 Raw | 11447 Raw | 11448 Raw | 11449 Raw | 11450 Raw | Obs   | Actual Mass | Charge | Delta AMU | Delta PPM |
|----------------------------------------------------|----------------------|--------------|------|-----------|----------------|-------|-------|-------|-------|-------|-------|-------|-------|-----------|-----------|-----------|-----------|-----------|-----------|-----------|-----------|-------|-------------|--------|-----------|-----------|
| Serum albumin<br>OS=Bos taurus<br>GN=ALB PE=1 SV=4 | sp P02769 ALBU_BOVIN | aEFV<br>EVTk | 87%  | 40.1      | 52.04993       | Ref   | 0.91  | 0.39  | 1.1   | 0.88  | 0.54  | 1.3   | 0.7   | 3E+05     | 514000    | 4E+05     | 721000    | 679000    | 5E+05     | 8E+05     | 540000    | 765.9 | 1529.9      | 2      | 0.015     | 9.786     |
| Serum albumin<br>OS=Bos taurus<br>GN=ALB PE=1 SV=4 | sp P02769 ALBU_BOVIN | aEFV<br>EVTk | 91%  | 42.9      | 52.04993       | Ref   | 0.9   | 0.49  | 1.1   | 0.96  | 0.37  | 1.3   | 0.6   | 3E+05     | 715000    | 6E+05     | 1E+06     | 1000000   | 6E+05     | 1E+06     | 703000    | 765.9 | 1529.9      | 2      | 0.015     | 9.786     |
| Serum albumin<br>OS=Bos taurus<br>GN=ALB PE=1 SV=4 | sp P02769 ALBU_BOVIN | aEFV<br>EVTk | 72%  | 35.8      | 52.03914       | Ref   | 0.83  | 0.63  | 0.85  | 0.84  | 0.25  | 1.5   | 0.94  | 6E+05     | 1300000   | 1E+06     | 2E+06     | 1760000   | 1E+06     | 3E+06     | 1700000   | 511   | 1529.9      | 3      | 0.0143    | 9.359     |
| Serum albumin<br>OS=Bos taurus<br>GN=ALB PE=1 SV=4 | sp P02769 ALBU_BOVIN | aEFV<br>EVTk | 73%  | 35.7      | 51.71135       | Ref   | 0.87  | 0.62  | 0.64  | 0.95  | 0.77  | 1.1   | 0.75  | 7920      | 10800     | 9910      | 11200     | 15400     | 11900     | 15800     | 12100     | 511   | 1529.9      | 3      | 0.0034    | 2.245     |
| Serum albumin<br>OS=Bos taurus<br>GN=ALB PE=1 SV=4 | sp P02769 ALBU_BOVIN | aEFV<br>EVTk | 90%  | 42.3      | 51.88397       | Ref   | 0.9   | 0.56  | 0.99  | 0.91  | 0.5   | 1.3   | 0.71  | 17400     | 30900     | 26500     | 39900     | 41700     | 27400     | 48800     | 32900     | 765.9 | 1529.9      | 2      | 0.0083    | 5.409     |
| Serum albumin<br>OS=Bos taurus<br>GN=ALB PE=1 SV=4 | sp P02769 ALBU_BOVIN | aTEE<br>QLk  | 58%  | 32.7      | 52.30544       | Ref   | 0.88  | 0.55  | 1     | 0.92  | 0.42  | 1.4   | 0.61  | 7E+05     | 1310000   | 1E+06     | 2E+06     | 1800000   | 1E+06     | 2E+06     | 1310000   | 713.9 | 1425.8      | 2      | 0.0151    | 10.6      |

|                                                    |                              |                                   |     |      |          |     |      |      |     |      |      |     |      |       |        |       |        |        |       |       |        |       |        |   |        |       |
|----------------------------------------------------|------------------------------|-----------------------------------|-----|------|----------|-----|------|------|-----|------|------|-----|------|-------|--------|-------|--------|--------|-------|-------|--------|-------|--------|---|--------|-------|
| Serum albumin<br>OS=Bos taurus<br>GN=ALB PE=1 SV=4 | sp P0276<br>9 ALBU_B<br>OVIN | aTEE<br>QLk                       | 56% | 32.2 | 52.02589 | Ref | 0.87 | 0.76 | 1.1 | 0.9  | 0.44 | 1.3 | 0.56 | 48100 | 103000 | 1E+05 | 151000 | 142000 | 89400 | 2E+05 | 101000 | 713.9 | 1425.8 | 2 | 0.0049 | 3.407 |
| Serum albumin<br>OS=Bos taurus<br>GN=ALB PE=1 SV=4 | sp P0276<br>9 ALBU_B<br>OVIN | aTEE<br>QLk                       | 55% | 32.1 | 52.10661 | Ref | 0.94 | 0.67 | 1.1 | 0.88 | 0.44 | 1.3 | 0.53 | 11600 | 23200  | 20900 | 32000  | 30000  | 19300 | 35700 | 21300  | 713.9 | 1425.8 | 2 | 0.0025 | 1.781 |
| Serum albumin<br>OS=Bos taurus<br>GN=ALB PE=1 SV=4 | sp P0276<br>9 ALBU_B<br>OVIN | ccAA<br>DDk<br>EAcF<br>AVE<br>GPK | 86% | 38.1 | 51.13385 | Ref | 0.63 | 0.51 | 1.1 | 0.8  | 0.17 | 1.5 | 0.92 | 16600 | 22100  | 22100 | 36400  | 33600  | 18900 | 48200 | 33000  | 702.6 | 2806.3 | 4 | 0.0275 | 9.79  |
| Serum albumin<br>OS=Bos taurus<br>GN=ALB PE=1 SV=4 | sp P0276<br>9 ALBU_B<br>OVIN | ccAA<br>DDk<br>EAcF<br>AVE<br>GPK | 84% | 37.3 | 51.08206 | Ref | 0.5  | 0.56 | 1.3 | 0.87 | 0.27 | 1.5 | 0.62 | 9240  | 12400  | 14000 | 25600  | 21500  | 12500 | 30200 | 16400  | 702.6 | 2806.3 | 4 | 0.0284 | 10.13 |
| Serum albumin<br>OS=Bos taurus<br>GN=ALB PE=1 SV=4 | sp P0276<br>9 ALBU_B<br>OVIN | ccAA<br>DDk<br>EAcF<br>AVE<br>GPK | 70% | 34.4 | 51.13161 | Ref | 0.71 | 0.56 | 1.1 | 0.93 | 0.39 | 1.4 | 0.6  | 7200  | 11200  | 11000 | 18500  | 17600  | 10600 | 21900 | 12600  | 936.4 | 2806.3 | 3 | 0.0274 | 9.76  |
| Serum albumin<br>OS=Bos taurus<br>GN=ALB PE=1 SV=4 | sp P0276<br>9 ALBU_B<br>OVIN | ccTE<br>SLVN<br>R                 | 72% | 28.1 | 44.90085 | Ref | 0.83 | 0.5  | 1.1 | 0.63 | 0.34 | 1.3 | 0.72 | 20600 | 24100  | 20800 | 35800  | 28200  | 20100 | 40400 | 27200  | 710.8 | 1419.6 | 2 | 0.0167 | 11.76 |
| Serum albumin<br>OS=Bos taurus<br>GN=ALB PE=1 SV=4 | sp P0276<br>9 ALBU_B<br>OVIN | ccTE<br>SLVN<br>R                 | 90% | 35.8 | 45.49077 | Ref | 0.89 | 0.59 | 1.1 | 0.73 | 0.31 | 1.2 | 0.68 | 59100 | 72500  | 63800 | 102000 | 86900  | 56900 | 1E+05 | 75900  | 710.8 | 1419.6 | 2 | 0.0094 | 6.605 |

|                                                    |                      |                           |     |      |          |     |                           |                           |                         |                          |                          |                          |                          |                           |                           |                           |                         |                          |                          |                          |                          |       |        |   |        |       |
|----------------------------------------------------|----------------------|---------------------------|-----|------|----------|-----|---------------------------|---------------------------|-------------------------|--------------------------|--------------------------|--------------------------|--------------------------|---------------------------|---------------------------|---------------------------|-------------------------|--------------------------|--------------------------|--------------------------|--------------------------|-------|--------|---|--------|-------|
| Serum albumin<br>OS=Bos taurus<br>GN=ALB PE=1 SV=4 | sp P02769 ALBU_BOVIN | dAFL<br>GSFL<br>YEYS<br>R | 95% | 54   | 52.39011 | Ref | No Values<br>(0.98610616) | No Values<br>(0.86841273) | No Values<br>(0.701818) | No Values<br>(0.5613388) | No Values<br>(0.7572113) | No Values<br>(0.6944446) | No Values<br>(0.7053185) | No Values<br>(0.78371626) | No Values<br>(0.98610616) | No Values<br>(0.86841273) | No Values<br>(0.701818) | No Values<br>(0.5613388) | No Values<br>(0.7572113) | No Values<br>(0.6944446) | No Values<br>(0.7053185) | 624.7 | 1870.9 | 3 | 0.0112 | 5.965 |
| Serum albumin<br>OS=Bos taurus<br>GN=ALB PE=1 SV=4 | sp P02769 ALBU_BOVIN | dAFL<br>GSFL<br>YEYS<br>R | 95% | 51.1 | 52.48946 | Ref | 0.83                      | 0.47                      | 1                       | 0.94                     | 0.41                     | 1.4                      | 0.79                     | 1630                      | 3570                      | 3030                      | 5000                    | 5180                     | 3140                     | 6630                     | 4250                     | 936.5 | 1870.9 | 2 | 0.0106 | 5.662 |
| Serum albumin<br>OS=Bos taurus<br>GN=ALB PE=1 SV=4 | sp P02769 ALBU_BOVIN | dAFL<br>GSFL<br>YEYS<br>R | 95% | 48.2 | 52.66937 | Ref | 0.87                      | 0.57                      | 0.95                    | 0.96                     | 0.43                     | 1.4                      | 0.77                     | 1170                      | 2570                      | 2280                      | 3320                    | 3680                     | 2230                     | 4530                     | 2910                     | 936.5 | 1870.9 | 2 | 0.0034 | 1.816 |
| Serum albumin<br>OS=Bos taurus<br>GN=ALB PE=1 SV=4 | sp P02769 ALBU_BOVIN | dAFL<br>GSFL<br>YEYS<br>R | 95% | 57   | 52.60599 | Ref | 0.93                      | 0.51                      | 0.91                    | 0.95                     | 0.48                     | 1.4                      | 0.64                     | 470                       | 958                       | 777                       | 1150                    | 1310                     | 825                      | 1650                     | 957                      | 936.5 | 1870.9 | 2 | 0.0057 | 3.056 |
| Serum albumin<br>OS=Bos taurus<br>GN=ALB PE=1 SV=4 | sp P02769 ALBU_BOVIN | dAFL<br>GSFL<br>YEYS<br>R | 74% | 36.5 | 52.72009 | Ref | 1.1                       | 0.41                      | 1                       | 1                        | 0.26                     | 1.3                      | 0.74                     | 302                       | 755                       | 514                       | 883                     | 957                      | 499                      | 1090                     | 721                      | 936.5 | 1870.9 | 2 | #####  | 0.449 |
| Serum albumin<br>OS=Bos taurus<br>GN=ALB PE=1 SV=4 | sp P02769 ALBU_BOVIN | dAFL<br>GSFL<br>YEYS<br>R | 90% | 44.1 | 54.32471 | Ref | 0.91                      | 0.52                      | 1.1                     | 1                        | 0.22                     | 1.4                      | 0.54                     | 540                       | 977                       | 808                       | 1330                    | 1400                     | 706                      | 1650                     | 918                      | 1089  | 2175.1 | 2 | 0.0115 | 5.266 |
| Serum albumin<br>OS=Bos taurus<br>GN=ALB PE=1 SV=4 | sp P02769 ALBU_BOVIN | dAFL<br>GSFL<br>YEYS<br>R | 81% | 41.1 | 54.32349 | Ref | 0.8                       | 0.42                      | 1.1                     | 0.95                     | 0.35                     | 1.4                      | 0.48                     | 3910                      | 5370                      | 4490                      | 8140                    | 8010                     | 4600                     | 9940                     | 5230                     | 726.1 | 2175.1 | 3 | 0.0141 | 6.473 |

|                                                    |                      |                           |     |      |          |     |      |      |      |      |      |     |      |       |       |       |       |       |       |       |       |     |      |   |        |       |
|----------------------------------------------------|----------------------|---------------------------|-----|------|----------|-----|------|------|------|------|------|-----|------|-------|-------|-------|-------|-------|-------|-------|-------|-----|------|---|--------|-------|
| Serum albumin<br>OS=Bos taurus<br>GN=ALB PE=1 SV=4 | sp P02769 ALBU_BOVIN | dDP<br>HAcY<br>STVF<br>Dk | 84% | 38.5 | 50.69591 | Ref | 1.1  | 0.54 | 0.84 | 0.74 | 0.52 | 1.2 | 0.67 | 4210  | 5740  | 4380  | 6040  | 6190  | 4660  | 7580  | 5370  | 718 | 2151 | 3 | 0.0265 | 12.31 |
| Serum albumin<br>OS=Bos taurus<br>GN=ALB PE=1 SV=4 | sp P02769 ALBU_BOVIN | dDP<br>HAcY<br>STVF<br>Dk | 60% | 31.8 | 50.79575 | Ref | 0.96 | 0.54 | 0.95 | 0.76 | 0.62 | 1   | 0.75 | 9410  | 12800 | 10400 | 15500 | 15000 | 11800 | 16600 | 13400 | 718 | 2151 | 3 | 0.0239 | 11.11 |
| Serum albumin<br>OS=Bos taurus<br>GN=ALB PE=1 SV=4 | sp P02769 ALBU_BOVIN | dDP<br>HAcY<br>STVF<br>Dk | 89% | 41.9 | 50.79152 | Ref | 0.97 | 0.42 | 0.95 | 0.81 | 0.51 | 1.3 | 0.62 | 5470  | 7500  | 5580  | 9010  | 9010  | 6390  | 11300 | 7150  | 718 | 2151 | 3 | 0.0235 | 10.94 |
| Serum albumin<br>OS=Bos taurus<br>GN=ALB PE=1 SV=4 | sp P02769 ALBU_BOVIN | dDP<br>HAcY<br>STVF<br>Dk | 95% | 52.1 | 50.88696 | Ref | 0.97 | 0.48 | 1    | 0.76 | 0.63 | 1.2 | 0.56 | 12900 | 20000 | 15400 | 25200 | 23200 | 18400 | 29600 | 18300 | 718 | 2151 | 3 | 0.021  | 9.756 |
| Serum albumin<br>OS=Bos taurus<br>GN=ALB PE=1 SV=4 | sp P02769 ALBU_BOVIN | dDP<br>HAcY<br>STVF<br>Dk | 74% | 35.2 | 50.93071 | Ref | 1    | 0.56 | 0.9  | 0.79 | 0.62 | 1.3 | 0.4  | 3970  | 6630  | 5160  | 7290  | 7480  | 5800  | 9860  | 5170  | 718 | 2151 | 3 | 0.0202 | 9.407 |
| Serum albumin<br>OS=Bos taurus<br>GN=ALB PE=1 SV=4 | sp P02769 ALBU_BOVIN | dDP<br>HAcY<br>STVF<br>Dk | 78% | 36.5 | 51.06895 | Ref | 0.97 | 0.65 | 0.98 | 0.83 | 0.58 | 1.1 | 0.56 | 11700 | 17400 | 15100 | 21300 | 21200 | 15600 | 23400 | 15900 | 718 | 2151 | 3 | 0.0171 | 7.958 |
| Serum albumin<br>OS=Bos taurus<br>GN=ALB PE=1 SV=4 | sp P02769 ALBU_BOVIN | dDP<br>HAcY<br>STVF<br>Dk | 83% | 38.6 | 51.23558 | Ref | 0.98 | 0.43 | 1.1  | 0.88 | 0.45 | 1.2 | 0.37 | 4660  | 6310  | 4680  | 8360  | 7910  | 5120  | 9230  | 5030  | 718 | 2151 | 3 | 0.014  | 6.522 |

|                                                    |                              |                           |     |      |          |     |      |      |      |      |      |      |      |       |       |       |       |       |       |       |       |       |        |   |        |       |
|----------------------------------------------------|------------------------------|---------------------------|-----|------|----------|-----|------|------|------|------|------|------|------|-------|-------|-------|-------|-------|-------|-------|-------|-------|--------|---|--------|-------|
| Serum albumin<br>OS=Bos taurus<br>GN=ALB PE=1 SV=4 | sp P0276<br>9 ALBU_B<br>OVIN | dDP<br>HAcY<br>STVF<br>Dk | 95% | 51.1 | 51.3952  | Ref | 0.8  | 0.52 | 0.97 | 0.88 | 0.45 | 1.5  | 0.67 | 38700 | 65200 | 58200 | 89300 | 92600 | 60200 | 1E+05 | 72500 | 718   | 2151   | 3 | 0.0107 | 4.988 |
| Serum albumin<br>OS=Bos taurus<br>GN=ALB PE=1 SV=4 | sp P0276<br>9 ALBU_B<br>OVIN | dDP<br>HAcY<br>STVF<br>Dk | 92% | 45.6 | 50.88646 | Ref | 0.79 | 0.8  | 1.1  | 0.86 | 0.4  | 1.3  | 0.52 | 6650  | 10800 | 11900 | 16400 | 15300 | 9710  | 18900 | 11000 | 718   | 2151   | 3 | 0.0215 | 10.01 |
| Serum albumin<br>OS=Bos taurus<br>GN=ALB PE=1 SV=4 | sp P0276<br>9 ALBU_B<br>OVIN | dDP<br>HAcY<br>STVF<br>Dk | 92% | 45.7 | 50.92984 | Ref | 0.85 | 0.41 | 0.92 | 0.86 | 0.65 | 1    | 0.8  | 7850  | 9060  | 7240  | 11600 | 12300 | 9270  | 12700 | 10600 | 718   | 2151   | 3 | 0.0204 | 9.491 |
| Serum albumin<br>OS=Bos taurus<br>GN=ALB PE=1 SV=4 | sp P0276<br>9 ALBU_B<br>OVIN | dDP<br>HAcY<br>STVF<br>Dk | 88% | 42   | 51.52496 | Ref | 0.91 | 0.68 | 0.84 | 0.71 | 0.57 | 0.99 | 0.84 | 4150  | 4810  | 4450  | 5560  | 5590  | 4430  | 6220  | 5550  | 718   | 2151   | 3 | 0.0065 | 3.023 |
| Serum albumin<br>OS=Bos taurus<br>GN=ALB PE=1 SV=4 | sp P0276<br>9 ALBU_B<br>OVIN | dDSP<br>DLpk              | 53% | 32.3 | 52.34795 | Ref | 0.89 | 0.71 | 0.9  | 0.88 | 0.51 | 1.1  | 0.57 | 42800 | 51800 | 49600 | 63800 | 69200 | 46800 | 73000 | 50600 | 498.9 | 1493.8 | 3 | 0.0161 | 10.75 |
| Serum albumin<br>OS=Bos taurus<br>GN=ALB PE=1 SV=4 | sp P0276<br>9 ALBU_B<br>OVIN | dTHk<br>SEIA<br>HR        | 51% | 27.4 | 53.15834 | Ref | 0.73 | 0.47 | 1.1  | 0.6  | 1.1  | 1.2  | 0.79 | 17400 | 32500 | 29500 | 50500 | 39800 | 49300 | 53700 | 41100 | 361.2 | 1801   | 5 | 0.0104 | 5.781 |
| Serum albumin<br>OS=Bos taurus<br>GN=ALB PE=1 SV=4 | sp P0276<br>9 ALBU_B<br>OVIN | eAcF<br>AVE<br>Gpk        | 52% | 31.9 | 52.11136 | Ref | 1.1  | 0.69 | 1    | 0.79 | 0.38 | 1    | 0.71 | 10600 | 16300 | 13700 | 19100 | 18200 | 11900 | 19500 | 15600 | 569   | 1703.9 | 3 | 0.0174 | 10.23 |

|                                                    |                      |                    |     |      |          |     |      |      |      |      |      |      |      |       |       |       |       |       |       |       |       |       |        |   |        |       |
|----------------------------------------------------|----------------------|--------------------|-----|------|----------|-----|------|------|------|------|------|------|------|-------|-------|-------|-------|-------|-------|-------|-------|-------|--------|---|--------|-------|
| Serum albumin<br>OS=Bos taurus<br>GN=ALB PE=1 SV=4 | sp P02769 ALBU_BOVIN | eAcFAVE<br>GPK     | 83% | 40   | 52.35488 | Ref | 1    | 0.71 | 0.89 | 0.85 | 0.38 | 0.94 | 0.82 | 13100 | 18400 | 16100 | 20500 | 22000 | 13900 | 21400 | 19500 | 569   | 1703.9 | 3 | 0.0103 | 6.04  |
| Serum albumin<br>OS=Bos taurus<br>GN=ALB PE=1 SV=4 | sp P02769 ALBU_BOVIN | eAcFAVE<br>GPK     | 69% | 35.5 | 52.44712 | Ref | 0.96 | 0.81 | 0.89 | 0.7  | 0.61 | 0.92 | 0.55 | 6830  | 7610  | 7460  | 8800  | 8520  | 6980  | 9050  | 6950  | 569   | 1703.9 | 3 | 0.0072 | 4.21  |
| Serum albumin<br>OS=Bos taurus<br>GN=ALB PE=1 SV=4 | sp P02769 ALBU_BOVIN | eccHGDLL<br>EcADDR | 95% | 47.3 | 35.84444 | Ref | 1.4  | 0.99 | 0.79 | 0.62 | 0.36 | 0.92 | 0.45 | 1470  | 2870  | 2380  | 2320  | 2270  | 1660  | 2550  | 1830  | 1011  | 2019.7 | 2 | 0.0108 | 5.368 |
| Serum albumin<br>OS=Bos taurus<br>GN=ALB PE=1 SV=4 | sp P02769 ALBU_BOVIN | eccHGDLL<br>EcADDR | 95% | 52.4 | 36.88509 | Ref | 0.92 | 0.68 | 1    | 0.73 | 0.46 | 1.1  | 0.62 | 16300 | 19900 | 18300 | 26300 | 23400 | 17000 | 27000 | 19600 | 674.3 | 2019.8 | 3 | #####  | 0.393 |
| Serum albumin<br>OS=Bos taurus<br>GN=ALB PE=1 SV=4 | sp P02769 ALBU_BOVIN | eccHGDLL<br>EcADDR | 95% | 74.1 | 35.74147 | Ref | 0.76 | 0.79 | 0.92 | 0.77 | 0.51 | 1    | 0.77 | 6080  | 6430  | 7120  | 8780  | 8680  | 6330  | 9450  | 7890  | 674.3 | 2019.7 | 3 | 0.0114 | 5.648 |
| Serum albumin<br>OS=Bos taurus<br>GN=ALB PE=1 SV=4 | sp P02769 ALBU_BOVIN | eccHGDLL<br>EcADDR | 95% | 54.3 | 35.83765 | Ref | 1.2  | 0.67 | 0.95 | 0.89 | 0.23 | 1.2  | 0.53 | 3040  | 5930  | 4560  | 6190  | 6580  | 3620  | 7500  | 4640  | 1011  | 2019.7 | 2 | 0.0111 | 5.487 |
| Serum albumin<br>OS=Bos taurus<br>GN=ALB PE=1 SV=4 | sp P02769 ALBU_BOVIN | eccHGDLL<br>EcADDR | 95% | 50.4 | 35.84897 | Ref | 0.93 | 0.59 | 1    | 0.75 | 0.6  | 1.1  | 0.6  | 1300  | 1670  | 1430  | 2130  | 1970  | 1550  | 2260  | 1610  | 674.3 | 2019.7 | 3 | 0.0107 | 5.277 |

|                                                    |                              |                            |     |      |          |     |      |      |      |      |      |      |      |       |        |       |        |        |       |       |        |       |        |   |        |       |
|----------------------------------------------------|------------------------------|----------------------------|-----|------|----------|-----|------|------|------|------|------|------|------|-------|--------|-------|--------|--------|-------|-------|--------|-------|--------|---|--------|-------|
| Serum albumin<br>OS=Bos taurus<br>GN=ALB PE=1 SV=4 | sp P0276<br>9 ALBU_B<br>OVIN | eccH<br>GDLL<br>EcAD<br>DR | 95% | 35.2 | 36.40282 | Ref | 0.68 | 0.56 | 0.91 | 0.76 | 0.43 | 1    | 1.1  | 2070  | 2110   | 2100  | 3020   | 3010   | 2090  | 3340  | 3450   | 674.3 | 2019.8 | 3 | 0.0055 | 2.738 |
| Serum albumin<br>OS=Bos taurus<br>GN=ALB PE=1 SV=4 | sp P0276<br>9 ALBU_B<br>OVIN | eccH<br>GDLL<br>EcAD<br>DR | 95% | 46   | 36.58775 | Ref | 1    | 0.66 | 0.95 | 0.68 | 0.7  | 0.92 | 0.63 | 559   | 698    | 597   | 822    | 748    | 661   | 804   | 657    | 674.3 | 2019.8 | 3 | 0.003  | 1.476 |
| Serum albumin<br>OS=Bos taurus<br>GN=ALB PE=1 SV=4 | sp P0276<br>9 ALBU_B<br>OVIN | eccH<br>GDLL<br>EcAD<br>DR | 95% | 38.2 | 36.41772 | Ref | 0.73 | 0.94 | 0.81 | 0.66 | 0.62 | 0.95 | 0.75 | 266   | 256    | 320   | 329    | 327    | 278   | 365   | 315    | 674.3 | 2019.8 | 3 | 0.0048 | 2.382 |
| Serum albumin<br>OS=Bos taurus<br>GN=ALB PE=1 SV=4 | sp P0276<br>9 ALBU_B<br>OVIN | eTYG<br>DMA<br>DccE<br>k   | 95% | 49   | 42.44549 | Ref | 0.55 | 0.58 | 1    | 0.95 | 0.43 | 1.4  | 0.9  | 4680  | 6980   | 7700  | 11800  | 12400  | 7540  | 15000 | 10800  | 1033  | 2063.8 | 2 | 0.029  | 14.05 |
| Serum albumin<br>OS=Bos taurus<br>GN=ALB PE=1 SV=4 | sp P0276<br>9 ALBU_B<br>OVIN | eTYG<br>DMA<br>DccE<br>k   | 95% | 46.6 | 42.75173 | Ref | 0.74 | 0.67 | 1    | 0.85 | 0.24 | 1.4  | 0.67 | 72200 | 93000  | 95500 | 136000 | 134000 | 76800 | 2E+05 | 108000 | 689   | 2063.8 | 3 | 0.025  | 12.11 |
| Serum albumin<br>OS=Bos taurus<br>GN=ALB PE=1 SV=4 | sp P0276<br>9 ALBU_B<br>OVIN | eTYG<br>DMA<br>DccE<br>k   | 95% | 51.1 | 42.86007 | Ref | 0.55 | 0.52 | 1.2  | 0.91 | 0.58 | 1.4  | 0.57 | 1E+05 | 229000 | 2E+05 | 433000 | 396000 | 3E+05 | 5E+05 | 282000 | 689   | 2063.8 | 3 | 0.0239 | 11.59 |
| Serum albumin<br>OS=Bos taurus<br>GN=ALB PE=1 SV=4 | sp P0276<br>9 ALBU_B<br>OVIN | eTYG<br>DMA<br>DccE<br>k   | 74% | 26.7 | 43.19564 | Ref | 0.72 | 0.45 | 1.2  | 1.1  | 0.51 | 1.3  | 0.52 | 21000 | 41300  | 37100 | 71800  | 73300  | 41900 | 74700 | 43700  | 1033  | 2063.8 | 2 | 0.0183 | 8.852 |

|                                                    |                      |                      |     |      |          |     |      |      |      |      |      |     |      |       |       |       |       |       |       |       |       |       |        |   |        |       |
|----------------------------------------------------|----------------------|----------------------|-----|------|----------|-----|------|------|------|------|------|-----|------|-------|-------|-------|-------|-------|-------|-------|-------|-------|--------|---|--------|-------|
| Serum albumin<br>OS=Bos taurus<br>GN=ALB PE=1 SV=4 | sp P02769 ALBU_BOVIN | eTYG<br>DMA<br>DccEk | 95% | 45.4 | 43.26377 | Ref | 0.71 | 0.56 | 1.2  | 0.97 | 0.34 | 1.3 | 0.74 | 9540  | 16300 | 15900 | 27400 | 26100 | 14700 | 29900 | 20100 | 689   | 2063.8 | 3 | 0.018  | 8.739 |
| Serum albumin<br>OS=Bos taurus<br>GN=ALB PE=1 SV=4 | sp P02769 ALBU_BOVIN | eTYG<br>DMA<br>DccEk | 83% | 29.8 | 43.26377 | Ref | 0.67 | 0.59 | 1.1  | 0.91 | 0.31 | 1.4 | 0.7  | 4970  | 6480  | 6650  | 10300 | 10200 | 5890  | 12800 | 8040  | 1033  | 2063.8 | 2 | 0.018  | 8.736 |
| Serum albumin<br>OS=Bos taurus<br>GN=ALB PE=1 SV=4 | sp P02769 ALBU_BOVIN | eTYG<br>DMA<br>DccEk | 89% | 34.9 | 43.53301 | Ref | 0.7  | 0.75 | 0.81 | 0.98 | 0.45 | 1.3 | 0.62 | 13100 | 16000 | 18000 | 21100 | 26200 | 15800 | 30100 | 18400 | 689   | 2063.8 | 3 | 0.015  | 7.243 |
| Serum albumin<br>OS=Bos taurus<br>GN=ALB PE=1 SV=4 | sp P02769 ALBU_BOVIN | eTYG<br>DMA<br>DccEk | 93% | 38.3 | 42.53919 | Ref | 0.57 | 0.77 | 1    | 0.92 | 0.41 | 1.2 | 0.77 | 22100 | 25200 | 31400 | 41700 | 43100 | 26400 | 48100 | 35100 | 689   | 2063.8 | 3 | 0.0276 | 13.36 |
| Serum albumin<br>OS=Bos taurus<br>GN=ALB PE=1 SV=4 | sp P02769 ALBU_BOVIN | eTYG<br>DMA<br>DccEk | 75% | 26.9 | 42.8769  | Ref | 0.59 | 0.54 | 1    | 1    | 0.37 | 1.4 | 0.6  | 2590  | 3360  | 3530  | 5620  | 6100  | 3400  | 7420  | 4140  | 1033  | 2063.8 | 2 | 0.0232 | 11.22 |
| Serum albumin<br>OS=Bos taurus<br>GN=ALB PE=1 SV=4 | sp P02769 ALBU_BOVIN | eTYG<br>DMA<br>DccEk | 84% | 32.2 | 44.00624 | Ref | 0.91 | 0.7  | 0.95 | 0.52 | 0.61 | 1.1 | 0.71 | 726   | 819   | 773   | 1030  | 844   | 784   | 1120  | 866   | 689   | 2063.9 | 3 | 0.0078 | 3.785 |
| Serum albumin<br>OS=Bos taurus<br>GN=ALB PE=1 SV=4 | sp P02769 ALBU_BOVIN | eTYG<br>DmA<br>DccEk | 95% | 44.2 | 41.96508 | Ref | 0.94 | 0.48 | 1.1  | 0.89 | 0.5  | 1.1 | 0.63 | 32800 | 44400 | 34800 | 58900 | 57200 | 38200 | 59700 | 43500 | 694.3 | 2079.8 | 3 | 0.0168 | 8.087 |



|                                                    |                      |                          |     |      |          |     |      |      |      |      |      |      |      |       |       |       |       |       |       |       |       |       |        |   |        |       |
|----------------------------------------------------|----------------------|--------------------------|-----|------|----------|-----|------|------|------|------|------|------|------|-------|-------|-------|-------|-------|-------|-------|-------|-------|--------|---|--------|-------|
| Serum albumin<br>OS=Bos taurus<br>GN=ALB PE=1 SV=4 | sp P02769 ALBU_BOVIN | eTYG<br>DmA<br>DccE<br>k | 93% | 37.3 | 41.74641 | Ref | 0.88 | 0.64 | 0.93 | 0.81 | 0.47 | 1.1  | 0.8  | 5190  | 6830  | 6280  | 8600  | 8740  | 6020  | 9940  | 7850  | 694.3 | 2079.8 | 3 | 0.0187 | 8.967 |
| Serum albumin<br>OS=Bos taurus<br>GN=ALB PE=1 SV=4 | sp P02769 ALBU_BOVIN | eYEA<br>TLEE<br>ccAk     | 95% | 54.2 | 49.08844 | Ref | 0.73 | 0.63 | 1.1  | 0.89 | 0.59 | 1.3  | 0.63 | 37400 | 63400 | 64400 | 99300 | 95600 | 67400 | 1E+05 | 72100 | 697   | 2087.9 | 3 | 0.0192 | 9.199 |
| Serum albumin<br>OS=Bos taurus<br>GN=ALB PE=1 SV=4 | sp P02769 ALBU_BOVIN | eYEA<br>TLEE<br>ccAk     | 95% | 44.7 | 49.13077 | Ref | 0.84 | 0.62 | 1.1  | 0.86 | 0.45 | 1.4  | 0.46 | 2340  | 3890  | 3620  | 5500  | 5280  | 3490  | 7100  | 3630  | 1045  | 2087.9 | 2 | 0.0185 | 8.871 |
| Serum albumin<br>OS=Bos taurus<br>GN=ALB PE=1 SV=4 | sp P02769 ALBU_BOVIN | eYEA<br>TLEE<br>ccAk     | 95% | 55.3 | 49.20671 | Ref | 0.69 | 0.53 | 1.1  | 0.92 | 0.42 | 1.4  | 0.72 | 21000 | 31300 | 30400 | 50500 | 49300 | 30500 | 61000 | 38900 | 697   | 2087.9 | 3 | 0.0166 | 7.964 |
| Serum albumin<br>OS=Bos taurus<br>GN=ALB PE=1 SV=4 | sp P02769 ALBU_BOVIN | eYEA<br>TLEE<br>ccAk     | 87% | 39.9 | 49.76964 | Ref | 0.82 | 0.73 | 0.73 | 0.79 | 0.67 | 0.98 | 0.88 | 12300 | 13800 | 14100 | 15900 | 18200 | 14700 | 19000 | 17500 | 697   | 2087.9 | 3 | 0.0051 | 2.45  |
| Serum albumin<br>OS=Bos taurus<br>GN=ALB PE=1 SV=4 | sp P02769 ALBU_BOVIN | eYEA<br>TLEE<br>ccAk     | 95% | 45.4 | 49.79821 | Ref | 0.86 | 0.57 | 1    | 0.86 | 0.48 | 1.5  | 0.48 | 2560  | 4500  | 4010  | 6170  | 6040  | 4070  | 8320  | 4220  | 1045  | 2087.9 | 2 | 0.0049 | 2.322 |
| Serum albumin<br>OS=Bos taurus<br>GN=ALB PE=1 SV=4 | sp P02769 ALBU_BOVIN | eYEA<br>TLEE<br>ccAk     | 95% | 48.1 | 49.13586 | Ref | 0.99 | 0.67 | 1.2  | 0.55 | 0.41 | 1.2  | 0.63 | 2170  | 3330  | 2890  | 4590  | 3300  | 2610  | 4710  | 3160  | 697   | 2087.9 | 3 | 0.0185 | 8.84  |

|                                                    |                      |                          |     |      |          |     |                        |                       |                        |                       |                        |                       |                       |                        |                        |                       |                        |                       |                        |                       |                       |      |        |   |        |       |
|----------------------------------------------------|----------------------|--------------------------|-----|------|----------|-----|------------------------|-----------------------|------------------------|-----------------------|------------------------|-----------------------|-----------------------|------------------------|------------------------|-----------------------|------------------------|-----------------------|------------------------|-----------------------|-----------------------|------|--------|---|--------|-------|
| Serum albumin<br>OS=Bos taurus<br>GN=ALB PE=1 SV=4 | sp P02769 ALBU_BOVIN | eYEATLEeccAk             | 95% | 56.4 | 49.36634 | Ref | 0.94                   | 0.51                  | 0.89                   | 0.76                  | 0.59                   | 1.3                   | 0.67                  | 1260                   | 1780                   | 1430                  | 2090                   | 2100                  | 1640                   | 2740                  | 1790                  | 697  | 2087.9 | 3 | 0.0137 | 6.571 |
| Serum albumin<br>OS=Bos taurus<br>GN=ALB PE=1 SV=4 | sp P02769 ALBU_BOVIN | eYEATLEeccAk             | 95% | 57.4 | 49.60576 | Ref | 0.89                   | 0.55                  | 1.1                    | 0.9                   | 0.54                   | 1.4                   | 0.49                  | 631                    | 1200                   | 1030                  | 1640                   | 1630                  | 1110                   | 2070                  | 1110                  | 1045 | 2087.9 | 2 | 0.0085 | 4.074 |
| Serum albumin<br>OS=Bos taurus<br>GN=ALB PE=1 SV=4 | sp P02769 ALBU_BOVIN | eYEATLEeccAk             | 95% | 48.5 | 49.23327 | Ref | 0.89                   | 0.68                  | 0.98                   | 0.82                  | 0.41                   | 1.1                   | 0.73                  | 757                    | 981                    | 923                   | 1270                   | 1250                  | 827                    | 1390                  | 1070                  | 697  | 2087.9 | 3 | 0.0157 | 7.533 |
| Serum albumin<br>OS=Bos taurus<br>GN=ALB PE=1 SV=4 | sp P02769 ALBU_BOVIN | eYEATLEeccAk             | 95% | 57.8 | 49.76139 | Ref | 1                      | 0.68                  | 0.82                   | 0.81                  | 0.5                    | 1.2                   | 0.74                  | 465                    | 832                    | 712                   | 885                    | 963                   | 678                    | 1190                  | 832                   | 697  | 2087.9 | 3 | 0.0057 | 2.708 |
| Serum albumin<br>OS=Bos taurus<br>GN=ALB PE=1 SV=4 | sp P02769 ALBU_BOVIN | eYEATLEeccAk             | 88% | 39.6 | 49.23959 | Ref | 0.62                   | 0.63                  | 1.1                    | 0.84                  | 0.68                   | 1.2                   | 0.35                  | 224                    | 210                    | 228                   | 359                    | 327                   | 255                    | 371                   | 211                   | 697  | 2087.9 | 3 | 0.0156 | 7.447 |
| Serum albumin<br>OS=Bos taurus<br>GN=ALB PE=1 SV=4 | sp P02769 ALBU_BOVIN | fkDLGEEHfK               | 61% | 34.4 | 53.47572 | Ref | 0.72                   | 0.51                  | 1.1                    | 0.96                  | 0.38                   | 1.5                   | 0.42                  | 1110                   | 1770                   | 1660                  | 2850                   | 2800                  | 1640                   | 3730                  | 1750                  | 1082 | 2161.2 | 2 | 0.0175 | 8.114 |
| Serum albumin<br>OS=Bos taurus<br>GN=ALB PE=1 SV=4 | sp P02769 ALBU_BOVIN | gLVLIAFSQYLq qcPF DEH VK | 62% | 37.1 | 55.74331 | Ref | No Values (0.98610616) | No Values (0.8684126) | No Values (0.70181787) | No Values (0.5613388) | No Values (0.75721127) | No Values (0.6944445) | No Values (0.7053185) | No Values (0.78371614) | No Values (0.98610616) | No Values (0.8684126) | No Values (0.70181787) | No Values (0.5613388) | No Values (0.75721127) | No Values (0.6944445) | No Values (0.7053185) | 1031 | 3090.6 | 3 | 0.007  | 2.277 |

|                                                    |                      |                     |     |      |          |     |      |      |      |      |      |      |      |       |        |       |        |        |       |       |        |       |        |   |        |       |
|----------------------------------------------------|----------------------|---------------------|-----|------|----------|-----|------|------|------|------|------|------|------|-------|--------|-------|--------|--------|-------|-------|--------|-------|--------|---|--------|-------|
| Serum albumin<br>OS=Bos taurus<br>GN=ALB PE=1 SV=4 | sp P02769 ALBU_BOVIN | hLVD<br>EPQ<br>NLIK | 83% | 37.7 | 52.22807 | Ref | 0.6  | 1.5  | 0.95 | 0.84 | 0.23 | 1.3  | 0.36 | 75600 | 162000 | 3E+05 | 252000 | 257000 | 1E+05 | 3E+05 | 167000 | 479.3 | 1913.1 | 4 | 0.0182 | 9.512 |
| Serum albumin<br>OS=Bos taurus<br>GN=ALB PE=1 SV=4 | sp P02769 ALBU_BOVIN | hLVD<br>EPQ<br>NLIK | 81% | 38.9 | 52.18593 | Ref | 0.71 | 1    | 0.93 | 0.89 | 0.56 | 0.91 | 0.41 | 9710  | 9410   | 12700 | 13300  | 14400  | 9940  | 13200 | 9290   | 638.7 | 1913.1 | 3 | 0.0171 | 8.924 |
| Serum albumin<br>OS=Bos taurus<br>GN=ALB PE=1 SV=4 | sp P02769 ALBU_BOVIN | hLVD<br>EPQ<br>NLIK | 90% | 44.3 | 52.16857 | Ref | 0.93 | 1.1  | 1.1  | 0.88 | 0.24 | 1.2  | 0.61 | 1E+05 | 327000 | 4E+05 | 440000 | 422000 | 2E+05 | 5E+05 | 317000 | 638.7 | 1913.1 | 3 | 0.016  | 8.344 |
| Serum albumin<br>OS=Bos taurus<br>GN=ALB PE=1 SV=4 | sp P02769 ALBU_BOVIN | hLVD<br>EPQ<br>NLIK | 95% | 62.5 | 52.0275  | Ref | 0.82 | 0.59 | 1.1  | 0.93 | 0.47 | 1.4  | 0.63 | 13900 | 27400  | 25500 | 39600  | 39700  | 25300 | 49500 | 29200  | 957.6 | 1913.1 | 2 | 0.0151 | 7.897 |
| Serum albumin<br>OS=Bos taurus<br>GN=ALB PE=1 SV=4 | sp P02769 ALBU_BOVIN | hLVD<br>EPQ<br>NLIK | 89% | 43.9 | 52.23369 | Ref | 0.85 | 0.96 | 0.83 | 0.96 | 0.44 | 1.4  | 0.41 | 35300 | 66000  | 77100 | 79300  | 95500  | 58000 | 1E+05 | 58800  | 638.7 | 1913.1 | 3 | 0.0191 | 9.974 |
| Serum albumin<br>OS=Bos taurus<br>GN=ALB PE=1 SV=4 | sp P02769 ALBU_BOVIN | hLVD<br>EPQ<br>NLIK | 95% | 60.3 | 52.19972 | Ref | 0.86 | 0.54 | 0.96 | 1    | 0.36 | 1.4  | 0.58 | 13900 | 25500  | 22200 | 33300  | 37600  | 21100 | 46500 | 25500  | 957.6 | 1913.1 | 2 | 0.018  | 9.422 |
| Serum albumin<br>OS=Bos taurus<br>GN=ALB PE=1 SV=4 | sp P02769 ALBU_BOVIN | hLVD<br>EPQ<br>NLIK | 95% | 60.2 | 52.23369 | Ref | 0.84 | 0.48 | 1    | 0.97 | 0.61 | 1.3  | 0.58 | 1430  | 2470   | 2090  | 3390   | 3630   | 2480  | 4210  | 2510   | 957.6 | 1913.1 | 2 | 0.019  | 9.934 |

|                                                    |                      |                     |     |      |          |     |      |      |      |      |       |     |      |       |       |       |       |       |       |       |       |       |        |   |        |       |
|----------------------------------------------------|----------------------|---------------------|-----|------|----------|-----|------|------|------|------|-------|-----|------|-------|-------|-------|-------|-------|-------|-------|-------|-------|--------|---|--------|-------|
| Serum albumin<br>OS=Bos taurus<br>GN=ALB PE=1 SV=4 | sp P02769 ALBU_BOVIN | hLVD<br>EPQ<br>nLlk | 88% | 42.2 | 51.90813 | Ref | 0.77 | 1    | 0.88 | 0.8  | 0.32  | 1.3 | 0.7  | 1010  | 1590  | 2030  | 2080  | 2180  | 1360  | 2790  | 1840  | 638.7 | 1913.1 | 3 | 0.0092 | 4.802 |
| Serum albumin<br>OS=Bos taurus<br>GN=ALB PE=1 SV=4 | sp P02769 ALBU_BOVIN | hLVD<br>EPQ<br>nLlk | 83% | 39.6 | 51.91853 | Ref | 0.94 | 0.99 | 0.75 | 0.77 | 0.49  | 1.1 | 0.69 | 641   | 959   | 1080  | 1020  | 1140  | 822   | 1310  | 976   | 638.7 | 1913.1 | 3 | 0.0129 | 6.729 |
| Serum albumin<br>OS=Bos taurus<br>GN=ALB PE=1 SV=4 | sp P02769 ALBU_BOVIN | hLVD<br>EPQ<br>nLlk | 55% | 32.9 | 52.7001  | Ref | 0.73 | 0.9  | 0.95 | 0.82 | 0.6   | 1.1 | 0.52 | 10300 | 11800 | 14400 | 16700 | 16900 | 12600 | 18700 | 12400 | 639   | 1914.1 | 3 | 0.0149 | 7.764 |
| Serum albumin<br>OS=Bos taurus<br>GN=ALB PE=1 SV=4 | sp P02769 ALBU_BOVIN | hLVD<br>EPQ<br>nLlk | 95% | 50.2 | 52.81315 | Ref | 0.82 | 0.61 | 1    | 0.89 | 0.36  | 1.4 | 0.66 | 2570  | 4560  | 4290  | 6300  | 6470  | 3890  | 8590  | 4990  | 958   | 1914.1 | 2 | 0.0184 | 9.61  |
| Serum albumin<br>OS=Bos taurus<br>GN=ALB PE=1 SV=4 | sp P02769 ALBU_BOVIN | hLVD<br>EPQ<br>nLlk | 95% | 61.1 | 52.79393 | Ref | 0.95 | 0.48 | 1    | 0.95 | 0.43  | 1.4 | 0.61 | 3260  | 6590  | 5170  | 8560  | 8880  | 5410  | 10700 | 6320  | 958.1 | 1914.1 | 2 | 0.0172 | 8.973 |
| Serum albumin<br>OS=Bos taurus<br>GN=ALB PE=1 SV=4 | sp P02769 ALBU_BOVIN | hLVD<br>EPQ<br>nLlk | 62% | 32.4 | 52.7836  | Ref | 0.85 | 1.2  | 1    | 0.73 | 0.098 | 1.3 | 0.5  | 23900 | 47500 | 65900 | 65900 | 58600 | 33000 | 79200 | 45000 | 479.5 | 1914.1 | 4 | 0.0166 | 8.676 |
| Serum albumin<br>OS=Bos taurus<br>GN=ALB PE=1 SV=4 | sp P02769 ALBU_BOVIN | hLVD<br>EPQ<br>nLlk | 95% | 55.7 | 52.79163 | Ref | 0.66 | 1.2  | 0.84 | 0.79 | 0.37  | 1.3 | 0.67 | 15100 | 26300 | 41900 | 36200 | 38500 | 25200 | 50100 | 32100 | 639   | 1914.1 | 3 | 0.0158 | 8.25  |

|                                                    |                      |                     |     |      |          |     |      |      |      |      |      |      |      |       |       |       |       |       |       |       |       |       |        |   |        |       |
|----------------------------------------------------|----------------------|---------------------|-----|------|----------|-----|------|------|------|------|------|------|------|-------|-------|-------|-------|-------|-------|-------|-------|-------|--------|---|--------|-------|
| Serum albumin<br>OS=Bos taurus<br>GN=ALB PE=1 SV=4 | sp P02769 ALBU_BOVIN | hPEY<br>AVS<br>VLLR | 86% | 41.1 | 52.10171 | Ref | 0.97 | 0.7  | 1.2  | 0.74 | 0.6  | 0.79 | 0.72 | 13600 | 19600 | 17600 | 27400 | 22400 | 17700 | 21200 | 20000 | 530   | 1586.9 | 3 | 0.0099 | 6.223 |
| Serum albumin<br>OS=Bos taurus<br>GN=ALB PE=1 SV=4 | sp P02769 ALBU_BOVIN | hPEY<br>AVS<br>VLLR | 90% | 43.9 | 52.03275 | Ref | 1    | 0.72 | 1    | 0.76 | 0.48 | 1.3  | 0.55 | 22700 | 49000 | 43500 | 60900 | 55100 | 39600 | 73800 | 43100 | 530   | 1586.9 | 3 | 0.0049 | 3.106 |
| Serum albumin<br>OS=Bos taurus<br>GN=ALB PE=1 SV=4 | sp P02769 ALBU_BOVIN | hPEY<br>AVS<br>VLLR | 60% | 32.7 | 51.96764 | Ref | 0.9  | 0.56 | 0.99 | 0.7  | 0.59 | 1.3  | 0.78 | 4050  | 6630  | 5670  | 8560  | 7750  | 6260  | 10400 | 7400  | 794.5 | 1586.9 | 2 | 0.0028 | 1.748 |
| Serum albumin<br>OS=Bos taurus<br>GN=ALB PE=1 SV=4 | sp P02769 ALBU_BOVIN | hPEY<br>AVS<br>VLLR | 88% | 42.1 | 51.80086 | Ref | 0.97 | 0.69 | 1.1  | 0.73 | 0.5  | 1.3  | 0.56 | 22100 | 38900 | 34600 | 50000 | 44000 | 32800 | 58100 | 35500 | 530   | 1586.9 | 3 | #####  | 0.215 |
| Serum albumin<br>OS=Bos taurus<br>GN=ALB PE=1 SV=4 | sp P02769 ALBU_BOVIN | hPEY<br>AVS<br>VLLR | 90% | 44.3 | 52.07912 | Ref | 0.82 | 0.68 | 0.78 | 0.76 | 0.55 | 1.2  | 0.74 | 2370  | 2610  | 2560  | 3090  | 3350  | 2530  | 4030  | 2990  | 530   | 1586.9 | 3 | 0.0068 | 4.258 |
| Serum albumin<br>OS=Bos taurus<br>GN=ALB PE=1 SV=4 | sp P02769 ALBU_BOVIN | hPEY<br>AVS<br>VLLR | 91% | 44.7 | 52.0356  | Ref | 0.85 | 0.71 | 0.89 | 0.75 | 0.68 | 1.1  | 0.68 | 928   | 1160  | 1150  | 1460  | 1450  | 1210  | 1680  | 1250  | 530   | 1586.9 | 3 | 0.0075 | 4.711 |
| Serum albumin<br>OS=Bos taurus<br>GN=ALB PE=1 SV=4 | sp P02769 ALBU_BOVIN | hPEY<br>AVS<br>VLLR | 91% | 45.1 | 52.06966 | Ref | 0.87 | 0.7  | 0.9  | 0.62 | 0.59 | 0.99 | 0.77 | 672   | 700   | 674   | 874   | 792   | 676   | 932   | 795   | 530   | 1586.9 | 3 | 0.0066 | 4.145 |

|                                                    |                      |              |     |      |          |     |      |      |      |      |      |      |      |       |        |       |        |        |       |       |        |       |        |   |        |       |
|----------------------------------------------------|----------------------|--------------|-----|------|----------|-----|------|------|------|------|------|------|------|-------|--------|-------|--------|--------|-------|-------|--------|-------|--------|---|--------|-------|
| Serum albumin<br>OS=Bos taurus<br>GN=ALB PE=1 SV=4 | sp P02769 ALBU_BOVIN | kQT ALVE LLk | 78% | 29.8 | 46.19656 | Ref | 0.75 | 0.54 | 0.98 | 0.95 | 0.42 | 1.4  | 0.74 | 6680  | 12000  | 11200 | 17100  | 18500  | 11100 | 23500 | 14500  | 514.6 | 2054.3 | 4 | 0.0375 | 18.23 |
| Serum albumin<br>OS=Bos taurus<br>GN=ALB PE=1 SV=4 | sp P02769 ALBU_BOVIN | kQT ALVE LLk | 93% | 40.2 | 44.80209 | Ref | 0.8  | 0.57 | 1    | 0.96 | 0.38 | 1.4  | 0.73 | 98100 | 194000 | 2E+05 | 278000 | 292000 | 2E+05 | 4E+05 | 224000 | 685.8 | 2054.3 | 3 | 0.0232 | 11.27 |
| Serum albumin<br>OS=Bos taurus<br>GN=ALB PE=1 SV=4 | sp P02769 ALBU_BOVIN | kQT ALVE LLk | 85% | 31.2 | 44.40437 | Ref | 0.79 | 0.33 | 1.1  | 0.92 | 0.27 | 1.6  | 0.77 | 86000 | 217000 | 2E+05 | 334000 | 318000 | 2E+05 | 5E+05 | 259000 | 514.6 | 2054.3 | 4 | 0.0197 | 9.565 |
| Serum albumin<br>OS=Bos taurus<br>GN=ALB PE=1 SV=4 | sp P02769 ALBU_BOVIN | kQT ALVE LLk | 95% | 40.9 | 43.59323 | Ref | 0.83 | 0.61 | 1.1  | 0.94 | 0.38 | 1.4  | 0.52 | 2370  | 4450   | 4150  | 6540   | 6440   | 3830  | 8120  | 4350   | 1028  | 2054.3 | 2 | 0.0105 | 5.092 |
| Serum albumin<br>OS=Bos taurus<br>GN=ALB PE=1 SV=4 | sp P02769 ALBU_BOVIN | kQT ALVE LLk | 83% | 28   | 42.5358  | Ref | 0.97 | 0.47 | 0.96 | 0.87 | 0.45 | 0.98 | 0.66 | 2320  | 2600   | 2000  | 3150   | 3260   | 2130  | 3200  | 2540   | 514.6 | 2054.3 | 4 | #####  | 0.186 |
| Serum albumin<br>OS=Bos taurus<br>GN=ALB PE=1 SV=4 | sp P02769 ALBU_BOVIN | kQT ALVE LLk | 59% | 26.6 | 45.7066  | Ref | 1.2  | 0.87 | 0.69 | 0.68 | 0.47 | 1    | 0.75 | 1550  | 2740   | 2360  | 2350   | 2580   | 1940  | 2990  | 2450   | 685.8 | 2054.3 | 3 | 0.0336 | 16.35 |
| Serum albumin<br>OS=Bos taurus<br>GN=ALB PE=1 SV=4 | sp P02769 ALBU_BOVIN | kQT ALVE LLk | 92% | 34.4 | 45.4893  | Ref | 0.64 | 0.44 | 1.2  | 0.88 | 0.66 | 1.4  | 0.63 | 3510  | 6120   | 5790  | 10900  | 9720   | 7320  | 12800 | 7430   | 411.9 | 2054.3 | 5 | 0.0309 | 15.06 |

|                                                    |                      |          |     |      |          |     |      |      |       |       |       |       |      |       |        |       |        |        |       |       |        |       |        |   |        |       |
|----------------------------------------------------|----------------------|----------|-----|------|----------|-----|------|------|-------|-------|-------|-------|------|-------|--------|-------|--------|--------|-------|-------|--------|-------|--------|---|--------|-------|
| Serum albumin<br>OS=Bos taurus<br>GN=ALB PE=1 SV=4 | sp P02769 ALBU_BOVIN | kQTLVLLk | 90% | 38   | 45.44031 | Ref | 0.66 | 1.7  | -0.19 | -0.28 | -0.05 | 0.027 | 2.1  | 2750  | 6590   | 15200 | 4480   | 4620   | 4740  | 5220  | 22300  | 685.8 | 2054.3 | 3 | 0.0292 | 14.22 |
| Serum albumin<br>OS=Bos taurus<br>GN=ALB PE=1 SV=4 | sp P02769 ALBU_BOVIN | kQTLVLLk | 94% | 40.3 | 45.4382  | Ref | 0.44 | 1.9  | -0.43 | -0.84 | 0.011 | -0.09 | 2.3  | 2210  | 5370   | 15500 | 3580   | 2970   | 4670  | 4550  | 23300  | 514.6 | 2054.3 | 4 | 0.0285 | 13.85 |
| Serum albumin<br>OS=Bos taurus<br>GN=ALB PE=1 SV=4 | sp P02769 ALBU_BOVIN | kQTLVLLk | 89% | 36.3 | 44.80366 | Ref | 0.81 | 0.42 | 1.2   | 1     | 0.4   | 1.3   | 0.63 | 2E+05 | 350000 | 3E+05 | 540000 | 545000 | 3E+05 | 6E+05 | 375000 | 685.8 | 2054.3 | 3 | 0.0234 | 11.36 |
| Serum albumin<br>OS=Bos taurus<br>GN=ALB PE=1 SV=4 | sp P02769 ALBU_BOVIN | kQTLVLLk | 95% | 44.1 | 44.41679 | Ref | 0.79 | 0.46 | 0.98  | 0.9   | 0.48  | 1.5   | 0.69 | 77900 | 157000 | 1E+05 | 218000 | 227000 | 1E+05 | 3E+05 | 178000 | 514.6 | 2054.3 | 4 | 0.0189 | 9.214 |
| Serum albumin<br>OS=Bos taurus<br>GN=ALB PE=1 SV=4 | sp P02769 ALBU_BOVIN | kQTLVLLk | 77% | 29.1 | 43.92011 | Ref | 0.62 | 0.4  | 1.2   | 0.95  | 0.47  | 1.5   | 0.6  | 15100 | 25600  | 23900 | 45100  | 43100  | 27100 | 58300 | 30700  | 685.8 | 2054.3 | 3 | 0.0138 | 6.735 |
| Serum albumin<br>OS=Bos taurus<br>GN=ALB PE=1 SV=4 | sp P02769 ALBU_BOVIN | kQTLVLLk | 95% | 42.8 | 42.89053 | Ref | 0.8  | 0.53 | 1.1   | 0.94  | 0.41  | 1.4   | 0.68 | 2230  | 3960   | 3580  | 5770   | 5890   | 3560  | 7270  | 4440   | 514.6 | 2054.3 | 4 | 0.0021 | 1.001 |
| Serum albumin<br>OS=Bos taurus<br>GN=ALB PE=1 SV=4 | sp P02769 ALBU_BOVIN | kQTLVLLk | 87% | 32.8 | 42.89053 | Ref | 0.81 | 0.67 | 0.91  | 0.92  | 0.52  | 1.1   | 0.73 | 3790  | 5060   | 4960  | 6570   | 7310   | 4840  | 7810  | 5800   | 685.8 | 2054.3 | 3 | 0.0019 | 0.94  |

|                                                    |                      |                    |     |      |          |     |      |      |      |      |      |     |      |      |      |      |       |       |      |       |      |       |        |   |        |       |
|----------------------------------------------------|----------------------|--------------------|-----|------|----------|-----|------|------|------|------|------|-----|------|------|------|------|-------|-------|------|-------|------|-------|--------|---|--------|-------|
| Serum albumin<br>OS=Bos taurus<br>GN=ALB PE=1 SV=4 | sp P02769 ALBU_BOVIN | kQT<br>ALVE<br>LLk | 87% | 30.6 | 42.89053 | Ref | 0.82 | 0.59 | 0.9  | 0.86 | 0.55 | 1.2 | 0.7  | 1260 | 1540 | 1420 | 1970  | 2120  | 1490 | 2440  | 1720 | 514.6 | 2054.3 | 4 | 0.0018 | 0.885 |
| Serum albumin<br>OS=Bos taurus<br>GN=ALB PE=1 SV=4 | sp P02769 ALBU_BOVIN | kQT<br>ALVE<br>LLk | 94% | 39   | 42.53144 | Ref | 0.96 | 0.44 | 0.97 | 0.76 | 0.56 | 1.1 | 0.86 | 2740 | 4040 | 3070 | 4960  | 4730  | 3600 | 5560  | 4600 | 685.8 | 2054.3 | 3 | #####  | 0.05  |
| Serum albumin<br>OS=Bos taurus<br>GN=ALB PE=1 SV=4 | sp P02769 ALBU_BOVIN | kQT<br>ALVE<br>LLk | 85% | 34   | 45.68894 | Ref | 0.73 | 0.62 | 1.1  | 0.94 | 0.42 | 1.3 | 0.63 | 5610 | 8130 | 8170 | 12600 | 12600 | 7720 | 14800 | 9250 | 685.8 | 2054.3 | 3 | 0.0316 | 15.38 |
| Serum albumin<br>OS=Bos taurus<br>GN=ALB PE=1 SV=4 | sp P02769 ALBU_BOVIN | kQT<br>ALVE<br>LLk | 88% | 30.5 | 45.43981 | Ref | 0.73 | 0.43 | 1.1  | 0.9  | 0.63 | 1.4 | 0.66 | 3360 | 5580 | 4900 | 8830  | 8420  | 6090 | 10500 | 6480 | 411.9 | 2054.3 | 5 | 0.0289 | 14.08 |
| Serum albumin<br>OS=Bos taurus<br>GN=ALB PE=1 SV=4 | sp P02769 ALBU_BOVIN | kQT<br>ALVE<br>LLk | 94% | 40.1 | 44.80596 | Ref | 0.85 | 0.66 | 0.89 | 0.75 | 0.48 | 1.2 | 0.72 | 1910 | 2360 | 2250 | 2960  | 2970  | 2150 | 3770  | 2620 | 514.6 | 2054.3 | 4 | 0.0241 | 11.71 |
| Serum albumin<br>OS=Bos taurus<br>GN=ALB PE=1 SV=4 | sp P02769 ALBU_BOVIN | kQT<br>ALVE<br>LLk | 93% | 40   | 44.1956  | Ref | 0.65 | 0.41 | 1.1  | 0.78 | 0.44 | 1.5 | 0.76 | 4330 | 6720 | 6170 | 11400 | 9880  | 6820 | 14800 | 8800 | 685.8 | 2054.3 | 3 | 0.0173 | 8.428 |
| Serum albumin<br>OS=Bos taurus<br>GN=ALB PE=1 SV=4 | sp P02769 ALBU_BOVIN | kQT<br>ALVE<br>LLk | 91% | 35.3 | 44.02055 | Ref | 0.87 | 0.53 | 1    | 0.92 | 0.36 | 1.3 | 0.73 | 3260 | 5380 | 4610 | 7370  | 7480  | 4430 | 8830  | 5960 | 514.6 | 2054.3 | 4 | 0.015  | 7.307 |



|                                                    |                      |                                 |     |      |          |     |      |      |      |      |      |      |      |       |       |       |       |       |       |       |       |       |        |   |        |       |
|----------------------------------------------------|----------------------|---------------------------------|-----|------|----------|-----|------|------|------|------|------|------|------|-------|-------|-------|-------|-------|-------|-------|-------|-------|--------|---|--------|-------|
| Serum albumin<br>OS=Bos taurus<br>GN=ALB PE=1 SV=4 | sp P02769 ALBU_BOVIN | kQT<br>ALVE<br>LLk              | 90% | 35.5 | 43.24879 | Ref | 0.78 | 0.37 | 1.1  | 0.96 | 0.42 | 1.5  | 0.75 | 2590  | 5080  | 4130  | 7500  | 7710  | 4630  | 9920  | 6050  | 685.8 | 2054.3 | 3 | 0.0104 | 5.042 |
| Serum albumin<br>OS=Bos taurus<br>GN=ALB PE=1 SV=4 | sp P02769 ALBU_BOVIN | kQT<br>ALVE<br>LLk              | 90% | 35.2 | 42.89634 | Ref | 0.75 | 0.57 | 1.1  | 0.98 | 0.44 | 1.2  | 0.7  | 770   | 1080  | 1030  | 1620  | 1690  | 1020  | 1820  | 1270  | 685.8 | 2054.3 | 3 | 0.0023 | 1.13  |
| Serum albumin<br>OS=Bos taurus<br>GN=ALB PE=1 SV=4 | sp P02769 ALBU_BOVIN | kQT<br>ALVE<br>LLk              | 83% | 33.1 | 45.68894 | Ref | 0.76 | 0.51 | 0.94 | 0.94 | 0.51 | 1.4  | 0.66 | 503   | 849   | 775   | 1170  | 1290  | 835   | 1670  | 962   | 685.8 | 2054.3 | 3 | 0.0316 | 15.38 |
| Serum albumin<br>OS=Bos taurus<br>GN=ALB PE=1 SV=4 | sp P02769 ALBU_BOVIN | kQT<br>ALVE<br>LLk              | 91% | 35   | 43.92011 | Ref | 0.88 | 0.53 | 0.94 | 0.96 | 0.42 | 1.3  | 0.84 | 786   | 1510  | 1280  | 1920  | 2150  | 1280  | 2460  | 1780  | 514.6 | 2054.3 | 4 | 0.0138 | 6.704 |
| Serum albumin<br>OS=Bos taurus<br>GN=ALB PE=1 SV=4 | sp P02769 ALBU_BOVIN | kVP<br>QVS<br>TPTL<br>VEVS<br>R | 95% | 51.2 | 51.16856 | Ref | 0.95 | 0.53 | 1    | 0.81 | 0.37 | 1.4  | 0.61 | 34200 | 56100 | 45600 | 71600 | 68200 | 43900 | 92300 | 53800 | 750.1 | 2247.3 | 3 | 0.0195 | 8.686 |
| Serum albumin<br>OS=Bos taurus<br>GN=ALB PE=1 SV=4 | sp P02769 ALBU_BOVIN | kVP<br>QVS<br>TPTL<br>VEVS<br>R | 95% | 59.4 | 50.87217 | Ref | 0.96 | 0.57 | 0.95 | 0.85 | 0.51 | 1.1  | 0.74 | 12500 | 18900 | 15600 | 22800 | 23500 | 16200 | 26000 | 19700 | 750.1 | 2247.3 | 3 | 0.0157 | 6.978 |
| Serum albumin<br>OS=Bos taurus<br>GN=ALB PE=1 SV=4 | sp P02769 ALBU_BOVIN | kVP<br>QVS<br>TPTL<br>VEVS<br>R | 95% | 49.8 | 51.43028 | Ref | 0.78 | 1.4  | 0.4  | 0.33 | 0.41 | 0.65 | 1.4  | 5010  | 7530  | 12800 | 7040  | 7410  | 6830  | 8420  | 14400 | 750.1 | 2247.3 | 3 | 0.0235 | 10.47 |

|                                                    |                      |                                 |     |      |          |     |                           |                          |                                  |                                   |                           |                                 |                                  |                           |                           |                          |                                  |                                   |                           |                                 |                                  |       |        |   |        |       |
|----------------------------------------------------|----------------------|---------------------------------|-----|------|----------|-----|---------------------------|--------------------------|----------------------------------|-----------------------------------|---------------------------|---------------------------------|----------------------------------|---------------------------|---------------------------|--------------------------|----------------------------------|-----------------------------------|---------------------------|---------------------------------|----------------------------------|-------|--------|---|--------|-------|
| Serum albumin<br>OS=Bos taurus<br>GN=ALB PE=1 SV=4 | sp P02769 ALBU_BOVIN | kVP<br>QVS<br>TPTL<br>VEVS<br>R | 95% | 53.9 | 51.02228 | Ref | 0.64                      | 0.51                     | 1.1                              | 1.1                               | 0.31                      | 1.4                             | 0.64                             | 2E+05                     | 415000                    | 4E+05                    | 718000                           | 744000                            | 4E+05                     | 9E+05                           | 505000                           | 750.1 | 2247.3 | 3 | 0.0173 | 7.698 |
| Serum albumin<br>OS=Bos taurus<br>GN=ALB PE=1 SV=4 | sp P02769 ALBU_BOVIN | kVP<br>QVS<br>TPTL<br>VEVS<br>R | 77% | 35.9 | 50.90649 | Ref | 0.77                      | 0.55                     | 0.92                             | 0.93                              | 0.39                      | 1.4                             | 0.71                             | 6960                      | 9370                      | 8730                     | 12700                            | 14000                             | 8430                      | 17200                           | 10900                            | 750.1 | 2247.3 | 3 | 0.0168 | 7.458 |
| Serum albumin<br>OS=Bos taurus<br>GN=ALB PE=1 SV=4 | sp P02769 ALBU_BOVIN | kVP<br>QVS<br>TPTL<br>VEVS<br>R | 94% | 45.8 | 50.90477 | Ref | No Values<br>(0.32350382) | No Values<br>(0.2058105) | Reference Missing<br>(1.3668486) | Reference Missing<br>(0.95956725) | No Values<br>(0.09460898) | Reference Missing<br>(1.444081) | Reference Missing<br>(0.8192463) | No Values<br>(0.12111389) | No Values<br>(0.32350382) | No Values<br>(0.2058105) | Reference Missing<br>(1.3668486) | Reference Missing<br>(0.95956725) | No Values<br>(0.09460898) | Reference Missing<br>(1.444081) | Reference Missing<br>(0.8192463) | 562.8 | 2247.3 | 4 | 0.0162 | 7.225 |
| Serum albumin<br>OS=Bos taurus<br>GN=ALB PE=1 SV=4 | sp P02769 ALBU_BOVIN | kVP<br>QVS<br>TPTL<br>VEVS<br>R | 95% | 55.7 | 50.90579 | Ref | 0.84                      | 0.62                     | 1.1                              | 0.93                              | 0.6                       | 1.1                             | 0.63                             | 35500                     | 53000                     | 49300                    | 75000                            | 75600                             | 52500                     | 77700                           | 55600                            | 750.1 | 2247.3 | 3 | 0.016  | 7.138 |
| Serum albumin<br>OS=Bos taurus<br>GN=ALB PE=1 SV=4 | sp P02769 ALBU_BOVIN | kVP<br>QVS<br>TPTL<br>VEVS<br>R | 58% | 32.2 | 51.47089 | Ref | 0.77                      | 1.1                      | 0.67                             | 0.54                              | 0.59                      | 0.67                            | 1.3                              | 6230                      | 7380                      | 9810                     | 8420                             | 8490                              | 7680                      | 8440                            | 12600                            | 750.1 | 2247.3 | 3 | 0.0257 | 11.45 |
| Serum albumin<br>OS=Bos taurus<br>GN=ALB PE=1 SV=4 | sp P02769 ALBU_BOVIN | kVP<br>QVS<br>TPTL<br>VEVS<br>R | 95% | 57.2 | 51.09008 | Ref | 0.69                      | 0.33                     | 1.3                              | 0.98                              | 0.44                      | 1.4                             | 0.62                             | 36700                     | 59700                     | 50400                    | 109000                           | 98200                             | 58800                     | 1E+05                           | 69000                            | 750.1 | 2247.3 | 3 | 0.019  | 8.432 |
| Serum albumin<br>OS=Bos taurus<br>GN=ALB PE=1 SV=4 | sp P02769 ALBU_BOVIN | kVP<br>QVS<br>TPTL<br>VEVS<br>R | 85% | 37.6 | 51.02207 | Ref | 0.53                      | 1.1                      | 0.89                             | 0.43                              | 0.67                      | 1.1                             | 0.72                             | 40000                     | 36400                     | 59200                    | 57200                            | 45700                             | 47300                     | 66300                           | 50500                            | 562.8 | 2247.3 | 4 | 0.0172 | 7.652 |

|                                                    |                      |                                 |     |      |          |     |      |      |      |      |      |     |      |       |       |       |       |       |       |       |       |       |        |   |        |       |
|----------------------------------------------------|----------------------|---------------------------------|-----|------|----------|-----|------|------|------|------|------|-----|------|-------|-------|-------|-------|-------|-------|-------|-------|-------|--------|---|--------|-------|
| Serum albumin<br>OS=Bos taurus<br>GN=ALB PE=1 SV=4 | sp P02769 ALBU_BOVIN | kVP<br>QVS<br>TPTL<br>VEVS<br>R | 95% | 63.6 | 51.05183 | Ref | 0.92 | 0.55 | 0.9  | 0.94 | 0.53 | 1.3 | 0.65 | 3360  | 5500  | 4610  | 6590  | 7490  | 4900  | 8510  | 5540  | 750.1 | 2247.3 | 3 | 0.0179 | 7.952 |
| Serum albumin<br>OS=Bos taurus<br>GN=ALB PE=1 SV=4 | sp P02769 ALBU_BOVIN | kVPq<br>VSTP<br>TLVE<br>VSR     | 95% | 59.4 | 52.02581 | Ref | 0.86 | 0.66 | 0.82 | 0.74 | 0.67 | 1.2 | 0.71 | 13500 | 17000 | 16100 | 20100 | 21100 | 17400 | 25900 | 18600 | 750.4 | 2248.3 | 3 | 0.0236 | 10.5  |
| Serum albumin<br>OS=Bos taurus<br>GN=ALB PE=1 SV=4 | sp P02769 ALBU_BOVIN | lcVL<br>HEK                     | 55% | 31.8 | 51.93169 | Ref | 0.88 | 0.53 | 0.92 | 0.87 | 0.6  | 1.2 | 0.8  | 711   | 1130  | 966   | 1420  | 1510  | 1090  | 1740  | 1300  | 748.4 | 1494.9 | 2 | #####  | 0.067 |
| Serum albumin<br>OS=Bos taurus<br>GN=ALB PE=1 SV=4 | sp P02769 ALBU_BOVIN | IFTF<br>HADI<br>cTLP<br>DTEK    | 86% | 44   | 54.90481 | Ref | 0.83 | 0.52 | 1    | 0.95 | 0.46 | 1.4 | 0.59 | 693   | 1350  | 1180  | 1890  | 1970  | 1230  | 2530  | 1390  | 835.8 | 2504.3 | 3 | 0.0022 | 0.862 |
| Serum albumin<br>OS=Bos taurus<br>GN=ALB PE=1 SV=4 | sp P02769 ALBU_BOVIN | IFTF<br>HADI<br>cTLP<br>DTEK    | 77% | 40   | 54.728   | Ref | 0.85 | 0.58 | 1.1  | 0.91 | 0.29 | 1.4 | 0.7  | 727   | 1500  | 1350  | 2130  | 2100  | 1200  | 2760  | 1640  | 835.8 | 2504.3 | 3 | 0.016  | 6.383 |
| Serum albumin<br>OS=Bos taurus<br>GN=ALB PE=1 SV=4 | sp P02769 ALBU_BOVIN | IFTF<br>HADI<br>cTLP<br>DTEK    | 91% | 48   | 54.6712  | Ref | 0.89 | 0.51 | 1    | 0.85 | 0.32 | 1.4 | 0.75 | 749   | 1440  | 1200  | 1950  | 1870  | 1130  | 2510  | 1580  | 835.8 | 2504.3 | 3 | 0.0185 | 7.401 |
| Serum albumin<br>OS=Bos taurus<br>GN=ALB PE=1 SV=4 | sp P02769 ALBU_BOVIN | IFTF<br>HADI<br>cTLP<br>DTEK    | 73% | 38.7 | 54.65477 | Ref | 0.81 | 0.35 | 1.2  | 0.87 | 0.27 | 1.4 | 0.84 | 303   | 595   | 468   | 925   | 829   | 479   | 1120  | 734   | 835.8 | 2504.3 | 3 | 0.0204 | 8.131 |

|                                                    |                      |                            |     |      |          |     |      |      |      |      |                             |     |      |       |        |       |        |        |                             |       |        |       |      |   |        |       |
|----------------------------------------------------|----------------------|----------------------------|-----|------|----------|-----|------|------|------|------|-----------------------------|-----|------|-------|--------|-------|--------|--------|-----------------------------|-------|--------|-------|------|---|--------|-------|
| Serum albumin<br>OS=Bos taurus<br>GN=ALB PE=1 SV=4 | sp P02769 ALBU_BOVIN | I GEY<br>GFQ<br>NALI<br>VR | 95% | 52.5 | 53.22249 | Ref | 0.88 | 0.52 | 1.1  | 0.79 | 0.39                        | 1.4 | 0.69 | 54700 | 111000 | 94500 | 157000 | 141000 | 93100                       | 2E+05 | 119000 | 892.5 | 1783 | 2 | 0.0116 | 6.488 |
| Serum albumin<br>OS=Bos taurus<br>GN=ALB PE=1 SV=4 | sp P02769 ALBU_BOVIN | I GEY<br>GFQ<br>NALI<br>VR | 74% | 36.9 | 53.19976 | Ref | 0.71 | 0.59 | 1    | 0.96 | 0.46                        | 1.4 | 0.65 | 32000 | 52400  | 52500 | 78100  | 83700  | 51900                       | 1E+05 | 61500  | 892.5 | 1783 | 2 | 0.0111 | 6.208 |
| Serum albumin<br>OS=Bos taurus<br>GN=ALB PE=1 SV=4 | sp P02769 ALBU_BOVIN | I GEY<br>GFQ<br>NALI<br>VR | 95% | 65.6 | 53.21735 | Ref | 1.4  | 0.47 | 0.98 | 0.81 | Value Missing (-0.30085948) | 1.3 | 0.34 | 8420  | 16300  | 9280  | 14800  | 14500  | Value Missing (-0.30085948) | 19200 | 9500   | 595.3 | 1783 | 3 | 0.0106 | 5.914 |
| Serum albumin<br>OS=Bos taurus<br>GN=ALB PE=1 SV=4 | sp P02769 ALBU_BOVIN | I GEY<br>GFQ<br>NALI<br>VR | 69% | 35.7 | 53.22517 | Ref | 0.88 | 0.52 | 0.88 | 0.74 | 0.28                        | 1.5 | 0.88 | 501   | 819    | 695   | 998    | 995    | 632                         | 1500  | 993    | 892.5 | 1783 | 2 | 0.0145 | 8.125 |
| Serum albumin<br>OS=Bos taurus<br>GN=ALB PE=1 SV=4 | sp P02769 ALBU_BOVIN | I GEY<br>GFQ<br>NALI<br>VR | 92% | 44.5 | 53.28184 | Ref | 0.82 | 0.51 | 1.1  | 0.84 | 0.37                        | 1.4 | 0.73 | 1790  | 2970   | 2610  | 4260   | 4050   | 2550                        | 5460  | 3390   | 892.5 | 1783 | 2 | 0.0073 | 4.089 |
| Serum albumin<br>OS=Bos taurus<br>GN=ALB PE=1 SV=4 | sp P02769 ALBU_BOVIN | I GEY<br>GFQ<br>NALI<br>VR | 95% | 59.4 | 53.23446 | Ref | 0.88 | 0.39 | 1    | 0.98 | 0.37                        | 1.4 | 0.72 | 1080  | 1890   | 1450  | 2510   | 2720   | 1550                        | 3220  | 2050   | 892.5 | 1783 | 2 | 0.0072 | 4.021 |
| Serum albumin<br>OS=Bos taurus<br>GN=ALB PE=1 SV=4 | sp P02769 ALBU_BOVIN | I GEY<br>GFQ<br>NALI<br>VR | 95% | 52.1 | 53.1702  | Ref | 0.67 | 0.5  | 0.77 | 0.74 | 0.63                        | 1.3 | 0.68 | 367   | 309    | 299   | 404    | 437    | 354                         | 575   | 380    | 595.3 | 1783 | 3 | 0.0069 | 3.862 |

|                                                    |                      |                            |     |      |          |     |      |      |      |      |      |     |      |       |       |       |       |       |       |       |       |      |        |   |        |       |
|----------------------------------------------------|----------------------|----------------------------|-----|------|----------|-----|------|------|------|------|------|-----|------|-------|-------|-------|-------|-------|-------|-------|-------|------|--------|---|--------|-------|
| Serum albumin<br>OS=Bos taurus<br>GN=ALB PE=1 SV=4 | sp P02769 ALBU_BOVIN | I GEY<br>GFQ<br>NALI<br>VR | 54% | 33   | 53.23644 | Ref | 0.7  | 0.52 | 1.2  | 0.81 | 0.36 | 1.4 | 0.68 | 1190  | 1670  | 1600  | 2840  | 2410  | 1540  | 3290  | 2000  | 1045 | 2087.2 | 2 | 0.0171 | 8.169 |
| Serum albumin<br>OS=Bos taurus<br>GN=ALB PE=1 SV=4 | sp P02769 ALBU_BOVIN | I GEY<br>GFQ<br>NALI<br>VR | 95% | 50.1 | 53.40767 | Ref | 0.86 | 0.62 | 0.9  | 0.82 | 0.54 | 1.3 | 0.81 | 7290  | 12700 | 11700 | 15900 | 16600 | 11900 | 20900 | 14900 | 893  | 1784   | 2 | 0.0146 | 8.192 |
| Serum albumin<br>OS=Bos taurus<br>GN=ALB PE=1 SV=4 | sp P02769 ALBU_BOVIN | I GEY<br>GFQ<br>NALI<br>VR | 92% | 45   | 53.41001 | Ref | 0.78 | 0.36 | 1.1  | 0.87 | 0.54 | 1.4 | 0.71 | 16100 | 28000 | 22700 | 42100 | 40100 | 27700 | 53300 | 32400 | 893  | 1784   | 2 | 0.0068 | 3.811 |
| Serum albumin<br>OS=Bos taurus<br>GN=ALB PE=1 SV=4 | sp P02769 ALBU_BOVIN | I GEY<br>GFQ<br>NALI<br>VR | 92% | 45.5 | 53.39336 | Ref | 0.97 | 0.54 | 0.9  | 0.89 | 0.49 | 1.3 | 0.77 | 12300 | 22100 | 17900 | 25600 | 28200 | 18700 | 33100 | 23400 | 893  | 1784   | 2 | 0.0033 | 1.828 |
| Serum albumin<br>OS=Bos taurus<br>GN=ALB PE=1 SV=4 | sp P02769 ALBU_BOVIN | I GEY<br>GFQ<br>NALI<br>VR | 92% | 44.8 | 53.4132  | Ref | 1.1  | 0.44 | 0.97 | 0.92 | 0.3  | 1.4 | 0.74 | 2680  | 6540  | 4640  | 7530  | 8010  | 4550  | 10100 | 6400  | 893  | 1784   | 2 | 0.0139 | 7.778 |
| Serum albumin<br>OS=Bos taurus<br>GN=ALB PE=1 SV=4 | sp P02769 ALBU_BOVIN | I GEY<br>GFQ<br>NALI<br>VR | 94% | 47.1 | 53.36818 | Ref | 0.94 | 0.52 | 0.97 | 0.93 | 0.34 | 1.4 | 0.74 | 3110  | 6140  | 4990  | 7650  | 8200  | 4760  | 10100 | 6520  | 893  | 1784   | 2 | 0.0125 | 7.027 |
| Serum albumin<br>OS=Bos taurus<br>GN=ALB PE=1 SV=4 | sp P02769 ALBU_BOVIN | I GEY<br>GFQ<br>NALI<br>VR | 69% | 35.8 | 53.38203 | Ref | 1    | 0.57 | 0.94 | 0.77 | 0.37 | 1.3 | 0.79 | 618   | 1040  | 832   | 1210  | 1180  | 784   | 1530  | 1090  | 893  | 1784   | 2 | 0.0095 | 5.324 |

|                                                    |                      |                           |     |      |          |     |      |       |      |      |      |     |      |       |        |       |        |        |       |       |        |       |        |   |        |       |
|----------------------------------------------------|----------------------|---------------------------|-----|------|----------|-----|------|-------|------|------|------|-----|------|-------|--------|-------|--------|--------|-------|-------|--------|-------|--------|---|--------|-------|
| Serum albumin<br>OS=Bos taurus<br>GN=ALB PE=1 SV=4 | sp P02769 ALBU_BOVIN | IGFY<br>GFQ<br>nALI<br>VR | 74% | 37   | 53.40855 | Ref | 0.81 | 0.57  | 0.96 | 0.81 | 0.35 | 1.3 | 1    | 477   | 853    | 787   | 1150   | 1150   | 730   | 1490  | 1180   | 893   | 1784   | 2 | 0.0083 | 4.64  |
| Serum albumin<br>OS=Bos taurus<br>GN=ALB PE=1 SV=4 | sp P02769 ALBU_BOVIN | IkHL<br>VDE<br>PQN<br>LIK | 86% | 36.9 | 48.00456 | Ref | 0.41 | 0.088 | 1    | 1.1  | 0.63 | 1.4 | 1.1  | 1050  | 2130   | 1840  | 3910   | 4610   | 2890  | 5300  | 4230   | 820.5 | 2458.5 | 3 | 0.0162 | 6.567 |
| Serum albumin<br>OS=Bos taurus<br>GN=ALB PE=1 SV=4 | sp P02769 ALBU_BOVIN | IVNE<br>LTEF<br>Ak        | 95% | 55.6 | 52.42387 | Ref | 0.77 | 0.48  | 1.1  | 0.93 | 0.42 | 1.4 | 0.7  | 19100 | 35200  | 31200 | 52600  | 53000  | 32500 | 68400 | 40700  | 886.5 | 1771   | 2 | 0.0165 | 9.29  |
| Serum albumin<br>OS=Bos taurus<br>GN=ALB PE=1 SV=4 | sp P02769 ALBU_BOVIN | IVNE<br>LTEF<br>Ak        | 81% | 38.9 | 52.423   | Ref | 0.75 | 0.42  | 0.95 | 0.96 | 0.33 | 1.4 | 1    | 1E+05 | 254000 | 2E+05 | 357000 | 394000 | 2E+05 | 5E+05 | 371000 | 591.3 | 1771   | 3 | 0.0144 | 8.153 |
| Serum albumin<br>OS=Bos taurus<br>GN=ALB PE=1 SV=4 | sp P02769 ALBU_BOVIN | IVNE<br>LTEF<br>Ak        | 78% | 37.4 | 51.72209 | Ref | 0.68 | 0.5   | 0.97 | 0.79 | 0.65 | 1.1 | 1    | 741   | 961    | 920   | 1430   | 1390   | 1100  | 1570  | 1500   | 591.4 | 1771   | 3 | 0.0051 | 2.902 |
| Serum albumin<br>OS=Bos taurus<br>GN=ALB PE=1 SV=4 | sp P02769 ALBU_BOVIN | IVNE<br>LTEF<br>Ak        | 94% | 45.6 | 52.28657 | Ref | 0.82 | 0.49  | 1    | 0.96 | 0.38 | 1.4 | 0.66 | 7580  | 13100  | 11400 | 18700  | 19500  | 11300 | 23900 | 14300  | 886.5 | 1771   | 2 | 0.0123 | 6.942 |
| Serum albumin<br>OS=Bos taurus<br>GN=ALB PE=1 SV=4 | sp P02769 ALBU_BOVIN | IVNE<br>LTEF<br>Ak        | 91% | 45.6 | 52.40067 | Ref | 0.81 | 0.52  | 0.99 | 0.88 | 0.45 | 1.3 | 0.8  | 2030  | 2980   | 2630  | 4100   | 4200   | 2710  | 4990  | 3600   | 591.3 | 1771   | 3 | 0.0154 | 8.678 |

|                                                    |                      |                    |     |      |          |     |      |      |      |      |      |     |      |      |      |      |      |      |      |      |      |       |      |   |        |       |
|----------------------------------------------------|----------------------|--------------------|-----|------|----------|-----|------|------|------|------|------|-----|------|------|------|------|------|------|------|------|------|-------|------|---|--------|-------|
| Serum albumin<br>OS=Bos taurus<br>GN=ALB PE=1 SV=4 | sp P02769 ALBU_BOVIN | IVNE<br>LTEF<br>AK | 95% | 50.3 | 52.15368 | Ref | 0.79 | 0.54 | 1.1  | 0.93 | 0.38 | 1.4 | 0.59 | 1180 | 2140 | 1950 | 3310 | 3170 | 1890 | 3990 | 2260 | 886.5 | 1771 | 2 | 0.0095 | 5.362 |
| Serum albumin<br>OS=Bos taurus<br>GN=ALB PE=1 SV=4 | sp P02769 ALBU_BOVIN | IVNE<br>LTEF<br>AK | 91% | 45.8 | 52.21043 | Ref | 0.87 | 0.45 | 0.93 | 0.86 | 0.43 | 1.3 | 0.9  | 2640 | 4230 | 3430 | 5360 | 5630 | 3660 | 6960 | 5270 | 591.3 | 1771 | 3 | 0.0104 | 5.884 |
| Serum albumin<br>OS=Bos taurus<br>GN=ALB PE=1 SV=4 | sp P02769 ALBU_BOVIN | IVNE<br>LTEF<br>AK | 95% | 64.7 | 52.15973 | Ref | 0.86 | 0.36 | 1.1  | 0.95 | 0.39 | 1.4 | 0.69 | 855  | 1550 | 1190 | 2200 | 2210 | 1310 | 2730 | 1660 | 886.5 | 1771 | 2 | 0.0085 | 4.809 |
| Serum albumin<br>OS=Bos taurus<br>GN=ALB PE=1 SV=4 | sp P02769 ALBU_BOVIN | IVNE<br>LTEF<br>AK | 95% | 64.5 | 52.40072 | Ref | 0.78 | 0.52 | 1.1  | 0.88 | 0.35 | 1.4 | 0.72 | 623  | 1060 | 956  | 1570 | 1520 | 920  | 2010 | 1230 | 886.5 | 1771 | 2 | 0.0151 | 8.533 |
| Serum albumin<br>OS=Bos taurus<br>GN=ALB PE=1 SV=4 | sp P02769 ALBU_BOVIN | IVNE<br>LTEF<br>AK | 91% | 45.4 | 52.19307 | Ref | 1    | 0.58 | 0.9  | 0.79 | 0.27 | 1.2 | 0.91 | 1280 | 2310 | 1830 | 2570 | 2620 | 1590 | 3250 | 2570 | 591.3 | 1771 | 3 | 0.0111 | 6.291 |
| Serum albumin<br>OS=Bos taurus<br>GN=ALB PE=1 SV=4 | sp P02769 ALBU_BOVIN | IVNE<br>LTEF<br>AK | 83% | 40   | 52.44465 | Ref | 0.88 | 0.59 | 0.92 | 0.76 | 0.6  | 1.2 | 0.8  | 351  | 501  | 442  | 626  | 616  | 482  | 755  | 574  | 591.3 | 1771 | 3 | 0.0159 | 8.983 |
| Serum albumin<br>OS=Bos taurus<br>GN=ALB PE=1 SV=4 | sp P02769 ALBU_BOVIN | IVNE<br>LTEF<br>AK | 93% | 47.7 | 52.19645 | Ref | 0.93 | 0.41 | 0.9  | 0.67 | 0.47 | 1.4 | 0.85 | 446  | 705  | 535  | 845  | 792  | 603  | 1200 | 815  | 591.3 | 1771 | 3 | 0.0108 | 6.088 |

|                                                    |                      |                    |     |      |          |     |                                     |                                             |                                             |                                             |                                             |                                             |                                              |                            |                                     |                                             |                                             |                                     |                                             |                                             |                                      |       |        |   |        |       |
|----------------------------------------------------|----------------------|--------------------|-----|------|----------|-----|-------------------------------------|---------------------------------------------|---------------------------------------------|---------------------------------------------|---------------------------------------------|---------------------------------------------|----------------------------------------------|----------------------------|-------------------------------------|---------------------------------------------|---------------------------------------------|-------------------------------------|---------------------------------------------|---------------------------------------------|--------------------------------------|-------|--------|---|--------|-------|
| Serum albumin<br>OS=Bos taurus<br>GN=ALB PE=1 SV=4 | sp P02769 ALBU_BOVIN | IVnE<br>LTEF<br>AK | 87% | 41   | 52.80025 | Ref | 0.58                                | 0.53                                        | 0.88                                        | 0.99                                        | 0.69                                        | 1.5                                         | 0.7                                          | 2910                       | 5140                                | 5390                                        | 7710                                        | 9200                                | 6530                                        | 12000                                       | 6800                                 | 887   | 1772   | 2 | 0.0183 | 10.32 |
| Serum albumin<br>OS=Bos taurus<br>GN=ALB PE=1 SV=4 | sp P02769 ALBU_BOVIN | IVnE<br>LTEF<br>AK | 73% | 36.6 | 52.6997  | Ref | Reference<br>Missing<br>(1.0361656) | Refer<br>ence<br>Missi<br>ng<br>(0.7830933) | Refer<br>ence<br>Missi<br>ng<br>(1.3054217) | Refer<br>ence<br>Missi<br>ng<br>(0.9954354) | Refer<br>ence<br>Missi<br>ng<br>(0.1316004) | Refer<br>ence<br>Missi<br>ng<br>(1.2851745) | Refer<br>ence<br>Missi<br>ng<br>(0.51667255) | No<br>Values<br>(-1.43654) | Reference<br>Missing<br>(1.0361656) | Refer<br>ence<br>Missi<br>ng<br>(0.7830933) | Refer<br>ence<br>Missi<br>ng<br>(1.3054217) | Reference<br>Missing<br>(0.9954354) | Refer<br>ence<br>Missi<br>ng<br>(0.1311600) | Refer<br>ence<br>Missi<br>ng<br>(1.2851745) | Reference<br>Missing<br>(0.51667255) | 591.7 | 1772   | 3 | 0.0172 | 9.693 |
| Serum albumin<br>OS=Bos taurus<br>GN=ALB PE=1 SV=4 | sp P02769 ALBU_BOVIN | IVnE<br>LTEF<br>AK | 55% | 32.9 | 52.74675 | Ref | 0.93                                | 0.45                                        | 0.94                                        | 0.93                                        | 0.34                                        | 1.2                                         | 1.1                                          | 55600                      | 122000                              | 94600                                       | 149000                                      | 163000                              | 94600                                       | 2E+05                                       | 166000                               | 591.7 | 1772   | 3 | 0.0159 | 8.983 |
| Serum albumin<br>OS=Bos taurus<br>GN=ALB PE=1 SV=4 | sp P02769 ALBU_BOVIN | IVnE<br>LTEF<br>AK | 88% | 43.3 | 52.5629  | Ref | 0.8                                 | 0.43                                        | 1.1                                         | 0.79                                        | 0.31                                        | 1.1                                         | 0.93                                         | 17400                      | 20500                               | 17200                                       | 31900                                       | 27400                               | 17200                                       | 30500                                       | 27200                                | 591.7 | 1772   | 3 | 0.0108 | 6.089 |
| Serum albumin<br>OS=Bos taurus<br>GN=ALB PE=1 SV=4 | sp P02769 ALBU_BOVIN | IVnE<br>LTEF<br>AK | 95% | 48.1 | 52.37061 | Ref | 0.91                                | 0.68                                        | 0.93                                        | 0.96                                        | 0.39                                        | 1.2                                         | 0.58                                         | 2420                       | 3490                                | 3230                                        | 4310                                        | 4840                                | 2850                                        | 5220                                        | 3370                                 | 887   | 1772   | 2 | 0.0014 | 0.807 |
| Serum albumin<br>OS=Bos taurus<br>GN=ALB PE=1 SV=4 | sp P02769 ALBU_BOVIN | IVnE<br>LTEF<br>AK | 84% | 40.9 | 52.64005 | Ref | 0.76                                | 0.46                                        | 1.1                                         | 0.82                                        | 0.41                                        | 1.2                                         | 1                                            | 4460                       | 6560                                | 5800                                        | 9820                                        | 9160                                | 6010                                        | 10900                                       | 9540                                 | 591.7 | 1772   | 3 | 0.0132 | 7.426 |
| Serum albumin<br>OS=Bos taurus<br>GN=ALB PE=1 SV=4 | sp P02769 ALBU_BOVIN | IVTD<br>LTk        | 55% | 28.3 | 48.07583 | Ref | 0.88                                | 0.61                                        | 0.94                                        | 0.74                                        | 0.59                                        | 1.1                                         | 0.71                                         | 2150                       | 2720                                | 2450                                        | 3460                                        | 3300                                | 2610                                        | 3980                                        | 2930                                 | 466.6 | 1396.9 | 3 | 0.0013 | 0.92  |



|                                                    |                      |                            |     |      |          |     |                                  |                                  |                                  |                           |                                  |                                  |                           |                                  |                                  |                                  |                                  |                           |                                  |                                  |                           |        |        |       |        |       |
|----------------------------------------------------|----------------------|----------------------------|-----|------|----------|-----|----------------------------------|----------------------------------|----------------------------------|---------------------------|----------------------------------|----------------------------------|---------------------------|----------------------------------|----------------------------------|----------------------------------|----------------------------------|---------------------------|----------------------------------|----------------------------------|---------------------------|--------|--------|-------|--------|-------|
| Serum albumin<br>OS=Bos taurus<br>GN=ALB PE=1 SV=4 | sp P02769 ALBU_BOVIN | IVTD<br>LTKV<br>Hk         | 82% | 32.5 | 47.62446 | Ref | 0.91                             | 0.49                             | 1                                | 0.65                      | 0.81                             | 0.92                             | 0.74                      | 5660                             | 6690                             | 5400                             | 8730                             | 7500                      | 7290                             | 8210                             | 7200                      | 441.3  | 1761.1 | 4     | 0.0033 | 1.878 |
| Serum albumin<br>OS=Bos taurus<br>GN=ALB PE=1 SV=4 | sp P02769 ALBU_BOVIN | IVVS<br>TQT<br>ALA         | 95% | 46.3 | 51.57248 | Ref | No Values<br>(0.98610616)        | No Values<br>(0.86841273)        | No Values<br>(0.701818)          | No Values<br>(0.56133866) | No Values<br>(0.7521127)         | No Values<br>(0.6944444)         | No Values<br>(0.7053185)  | No Values<br>(0.78371614)        | No Values<br>(0.98610616)        | No Values<br>(0.86841273)        | No Values<br>(0.701818)          | No Values<br>(0.56133866) | No Values<br>(0.75721127)        | No Values<br>(0.6944444)         | No Values<br>(0.7053185)  | 653.9  | 1305.8 | 2     | 0.004  | 3.068 |
| Serum albumin<br>OS=Bos taurus<br>GN=ALB PE=1 SV=4 | sp P02769 ALBU_BOVIN | IVVS<br>TQT<br>ALA         | 95% | 49.5 | 51.91283 | Ref | Reference Missing<br>(1.2446446) | Reference Missing<br>(1.1587112) | Reference Missing<br>(1.0462523) | No Values<br>(-0.7110696) | Reference Missing<br>(0.9308845) | Reference Missing<br>(0.9685484) | No Values<br>(-0.6845649) | Reference Missing<br>(1.2446446) | Reference Missing<br>(1.1587112) | Reference Missing<br>(1.0462523) | Reference Missing<br>(0.8524033) | No Values<br>(-0.7110696) | Reference Missing<br>(0.9308845) | Reference Missing<br>(0.9685484) | 653.9                     | 1305.8 | 2      | 0.014 | 10.72  |       |
| Serum albumin<br>OS=Bos taurus<br>GN=ALB PE=1 SV=4 | sp P02769 ALBU_BOVIN | IVVS<br>TQT<br>ALA         | 95% | 72.8 | 51.73297 | Ref | No Values<br>(0.7177577)         | No Values<br>(0.60006434)        | No Values<br>(0.43346944)        | No Values<br>(0.29299024) | No Values<br>(0.48886272)        | Reference Missing<br>(1.8665931) | No Values<br>(0.43696997) | No Values<br>(0.51536745)        | No Values<br>(0.7177577)         | No Values<br>(0.60006434)        | No Values<br>(0.43346944)        | No Values<br>(0.29299024) | No Values<br>(0.48886272)        | Reference Missing<br>(1.8665931) | No Values<br>(0.43696997) | 653.9  | 1305.8 | 2     | 0.0099 | 7.553 |
| Serum albumin<br>OS=Bos taurus<br>GN=ALB PE=1 SV=4 | sp P02769 ALBU_BOVIN | mPc<br>TEDY<br>LSLIL<br>NR | 95% | 52.1 | 52.31426 | Ref | 0.88                             | 0.6                              | 0.97                             | 0.73                      | 0.48                             | 1.2                              | 0.64                      | 2100                             | 2460                             | 2200                             | 3190                             | 2990                      | 2190                             | 3750                             | 2530                      | 673.3  | 2017   | 3     | 0.0133 | 6.582 |
| Serum albumin<br>OS=Bos taurus<br>GN=ALB PE=1 SV=4 | sp P02769 ALBU_BOVIN | mPc<br>TEDY<br>LSLIL<br>NR | 95% | 62.7 | 52.55974 | Ref | 0.89                             | 0.61                             | 1                                | 0.92                      | 0.33                             | 1.4                              | 0.71                      | 5560                             | 11300                            | 10100                            | 14800                            | 15500                     | 9010                             | 19600                            | 12100                     | 1010   | 2017   | 2     | 0.0044 | 2.164 |
| Serum albumin<br>OS=Bos taurus<br>GN=ALB PE=1 SV=4 | sp P02769 ALBU_BOVIN | mPc<br>TEDY<br>LSLIL<br>NR | 91% | 45.8 | 52.42484 | Ref | 0.92                             | 0.39                             | 1                                | 0.71                      | 0.41                             | 1.1                              | 0.78                      | 227                              | 251                              | 188                              | 324                              | 291                       | 206                              | 353                              | 276                       | 673.3  | 2017   | 3     | 0.0098 | 4.858 |

|                                                    |                      |                            |     |      |          |     |      |      |      |      |      |     |      |      |      |      |      |      |      |      |      |       |      |   |        |       |
|----------------------------------------------------|----------------------|----------------------------|-----|------|----------|-----|------|------|------|------|------|-----|------|------|------|------|------|------|------|------|------|-------|------|---|--------|-------|
| Serum albumin<br>OS=Bos taurus<br>GN=ALB PE=1 SV=4 | sp P02769 ALBU_BOVIN | mPc<br>TEDY<br>LSLIL<br>NR | 95% | 59.8 | 52.46391 | Ref | 0.88 | 0.45 | 1    | 0.98 | 0.17 | 1.4 | 0.78 | 643  | 1270 | 1020 | 1700 | 1830 | 910  | 2270 | 1440 | 1010  | 2017 | 2 | 0.0086 | 4.285 |
| Serum albumin<br>OS=Bos taurus<br>GN=ALB PE=1 SV=4 | sp P02769 ALBU_BOVIN | mPc<br>TEDY<br>LSLIL<br>NR | 77% | 36.9 | 52.44057 | Ref | 0.99 | 0.38 | 1.1  | 1.1  | 0.14 | 1.3 | 0.69 | 320  | 641  | 456  | 821  | 922  | 420  | 997  | 634  | 1010  | 2017 | 2 | 0.0096 | 4.771 |
| Serum albumin<br>OS=Bos taurus<br>GN=ALB PE=1 SV=4 | sp P02769 ALBU_BOVIN | mPc<br>TEDY<br>LSLIL<br>NR | 64% | 34.2 | 52.46169 | Ref | 1    | 0.5  | 1    | 0.76 | 0.84 | 1   | 0.39 | 139  | 197  | 150  | 244  | 222  | 205  | 246  | 156  | 673.3 | 2017 | 3 | 0.008  | 3.951 |
| Serum albumin<br>OS=Bos taurus<br>GN=ALB PE=1 SV=4 | sp P02769 ALBU_BOVIN | mPc<br>TEDY<br>LSLIL<br>NR | 95% | 81   | 52.28716 | Ref | 0.73 | 0.68 | 0.95 | 0.92 | 0.54 | 1.2 | 0.72 | 2050 | 2700 | 2840 | 3850 | 4150 | 2780 | 4580 | 3270 | 1017  | 2033 | 2 | 0.0103 | 5.085 |
| Serum albumin<br>OS=Bos taurus<br>GN=ALB PE=1 SV=4 | sp P02769 ALBU_BOVIN | mPc<br>TEDY<br>LSLIL<br>NR | 95% | 66.6 | 51.81706 | Ref | 0.75 | 0.64 | 0.84 | 0.72 | 0.28 | 1.5 | 0.58 | 895  | 999  | 1000 | 1300 | 1310 | 845  | 2080 | 1080 | 678.7 | 2033 | 3 | 0.0135 | 6.627 |
| Serum albumin<br>OS=Bos taurus<br>GN=ALB PE=1 SV=4 | sp P02769 ALBU_BOVIN | mPc<br>TEDY<br>LSLIL<br>NR | 95% | 66.2 | 52.4192  | Ref | 0.89 | 0.47 | 0.97 | 0.92 | 0.39 | 1.4 | 0.83 | 1270 | 2540 | 2060 | 3270 | 3490 | 2110 | 4350 | 2970 | 1018  | 2033 | 2 | 0.0045 | 2.204 |
| Serum albumin<br>OS=Bos taurus<br>GN=ALB PE=1 SV=4 | sp P02769 ALBU_BOVIN | mPc<br>TEDY<br>LSLIL<br>NR | 95% | 85.7 | 52.32025 | Ref | 0.82 | 0.61 | 0.94 | 0.93 | 0.28 | 1.5 | 0.75 | 669  | 1420 | 1340 | 1880 | 2060 | 1150 | 2790 | 1650 | 1018  | 2033 | 2 | 0.0086 | 4.249 |

|                                                    |                              |                            |     |      |          |     |      |      |      |      |      |     |      |       |       |       |       |       |       |       |       |       |        |   |        |       |
|----------------------------------------------------|------------------------------|----------------------------|-----|------|----------|-----|------|------|------|------|------|-----|------|-------|-------|-------|-------|-------|-------|-------|-------|-------|--------|---|--------|-------|
| Serum albumin<br>OS=Bos taurus<br>GN=ALB PE=1 SV=4 | sp P0276<br>9 ALBU_B<br>OVIN | mPc<br>TEDY<br>LSLIL<br>NR | 73% | 36.4 | 52.49724 | Ref | 0.9  | 0.44 | 0.74 | 0.7  | 0.55 | 1.5 | 0.6  | 394   | 500   | 394   | 547   | 586   | 460   | 918   | 495   | 678.7 | 2033   | 3 | 0.0021 | 1.051 |
| Serum albumin<br>OS=Bos taurus<br>GN=ALB PE=1 SV=4 | sp P0276<br>9 ALBU_B<br>OVIN | nEcF<br>LSHK               | 67% | 34.7 | 52.07096 | Ref | 1.1  | 0.81 | 0.84 | 0.69 | 0.55 | 1.1 | 0.55 | 23600 | 32900 | 30200 | 34400 | 34200 | 27100 | 40900 | 28200 | 544.6 | 1630.8 | 3 | 0.0105 | 6.46  |
| Serum albumin<br>OS=Bos taurus<br>GN=ALB PE=1 SV=4 | sp P0276<br>9 ALBU_B<br>OVIN | nEcF<br>LSHK               | 61% | 33   | 52.12297 | Ref | 0.74 | 1.1  | 0.78 | 0.81 | 0.36 | 1.3 | 0.3  | 2770  | 2980  | 4210  | 3710  | 4200  | 2670  | 5210  | 2660  | 816.4 | 1630.8 | 2 | 0.0069 | 4.244 |
| Serum albumin<br>OS=Bos taurus<br>GN=ALB PE=1 SV=4 | sp P0276<br>9 ALBU_B<br>OVIN | qNc<br>DQF<br>Ek           | 79% | 27.9 | 42.92212 | Ref | 0.9  | 0.59 | 1.1  | 0.86 | 0.36 | 1.5 | 0.38 | 1720  | 3440  | 3010  | 4920  | 4490  | 2770  | 6370  | 2930  | 672.8 | 1343.6 | 2 | 0.0134 | 9.973 |
| Serum albumin<br>OS=Bos taurus<br>GN=ALB PE=1 SV=4 | sp P0276<br>9 ALBU_B<br>OVIN | qNc<br>DQF<br>Ek           | 52% | 22.7 | 43.16578 | Ref | 1.3  | 0.39 | 0.81 | 0.39 | 0.1  | 1.2 | 0.63 | 395   | 455   | 260   | 390   | 323   | 230   | 500   | 343   | 672.8 | 1343.6 | 2 | 0.0117 | 8.694 |
| Serum albumin<br>OS=Bos taurus<br>GN=ALB PE=1 SV=4 | sp P0276<br>9 ALBU_B<br>OVIN | qNc<br>DQF<br>Ek           | 83% | 29   | 42.48047 | Ref | 0.87 | 0.51 | 0.98 | 1    | 0.34 | 1.4 | 0.73 | 4000  | 7710  | 6510  | 10100 | 11300 | 6220  | 13400 | 8480  | 672.8 | 1343.6 | 2 | 0.0178 | 13.23 |
| Serum albumin<br>OS=Bos taurus<br>GN=ALB PE=1 SV=4 | sp P0276<br>9 ALBU_B<br>OVIN | qNc<br>DQF<br>Ek           | 82% | 28.8 | 42.68601 | Ref | 0.69 | 0.28 | 0.72 | 0.62 | 0.2  | 1.1 | 0.48 | 3920  | 1960  | 1600  | 2440  | 2500  | 1630  | 3250  | 2060  | 672.8 | 1343.6 | 2 | 0.0168 | 12.52 |

|                                                    |                      |                   |     |      |          |     |      |      |      |      |      |     |      |       |       |       |       |       |       |       |       |       |        |   |        |       |
|----------------------------------------------------|----------------------|-------------------|-----|------|----------|-----|------|------|------|------|------|-----|------|-------|-------|-------|-------|-------|-------|-------|-------|-------|--------|---|--------|-------|
| Serum albumin<br>OS=Bos taurus<br>GN=ALB PE=1 SV=4 | sp P02769 ALBU_BOVIN | qNc<br>DQF<br>Ek  | 65% | 24.4 | 42.76209 | Ref | 0.91 | 0.61 | 1    | 0.74 | 0.13 | 1.4 | 0.61 | 2290  | 3360  | 2960  | 4490  | 4010  | 2280  | 5900  | 3310  | 672.8 | 1343.6 | 2 | 0.0146 | 10.88 |
| Serum albumin<br>OS=Bos taurus<br>GN=ALB PE=1 SV=4 | sp P02769 ALBU_BOVIN | qNc<br>DQF<br>Ek  | 61% | 23.8 | 42.91769 | Ref | 1    | 0.59 | 1.1  | 0.84 | 0.61 | 1.2 | 0.5  | 8500  | 16300 | 13000 | 20000 | 19100 | 14200 | 22000 | 13700 | 672.8 | 1343.6 | 2 | 0.013  | 9.691 |
| Serum albumin<br>OS=Bos taurus<br>GN=ALB PE=1 SV=4 | sp P02769 ALBU_BOVIN | qNc<br>DQF<br>Ek  | 58% | 23.7 | 43.34615 | Ref | 0.91 | 0.42 | 0.52 | 0.82 | 0.59 | 1.3 | 0.77 | 476   | 501   | 387   | 466   | 635   | 471   | 783   | 555   | 672.8 | 1343.6 | 2 | 0.0096 | 7.147 |
| Serum albumin<br>OS=Bos taurus<br>GN=ALB PE=1 SV=4 | sp P02769 ALBU_BOVIN | qNc<br>DQF<br>Ek  | 95% | 45.2 | 50.30393 | Ref | 0.75 | 0.53 | 1.1  | 0.98 | 0.37 | 1.4 | 0.66 | 31600 | 52100 | 48700 | 80700 | 82400 | 47000 | 98400 | 59600 | 833.4 | 1664.8 | 2 | 0.0154 | 9.223 |
| Serum albumin<br>OS=Bos taurus<br>GN=ALB PE=1 SV=4 | sp P02769 ALBU_BOVIN | qNc<br>DQF<br>Ek  | 67% | 32.5 | 50.39973 | Ref | 0.83 | 0.36 | 1.1  | 0.92 | 0.42 | 1.3 | 0.77 | 18000 | 30300 | 23700 | 43600 | 43200 | 26700 | 52400 | 35300 | 833.4 | 1664.8 | 2 | 0.0138 | 8.262 |
| Serum albumin<br>OS=Bos taurus<br>GN=ALB PE=1 SV=4 | sp P02769 ALBU_BOVIN | qNc<br>DQF<br>Ek  | 88% | 39   | 50.32373 | Ref | 0.82 | 0.44 | 1.1  | 1    | 0.47 | 1.4 | 0.71 | 17500 | 36600 | 30700 | 52800 | 55800 | 33600 | 66400 | 41400 | 833.4 | 1664.8 | 2 | 0.0151 | 9.067 |
| Serum albumin<br>OS=Bos taurus<br>GN=ALB PE=1 SV=4 | sp P02769 ALBU_BOVIN | qTAL<br>VELL<br>k | 86% | 37.3 | 49.69709 | Ref | 1.4  | 0.51 | 0.76 | 0.77 | 0.18 | 1.2 | 0.79 | 419   | 959   | 570   | 761   | 845   | 489   | 1040  | 773   | 651.4 | 1300.8 | 2 | 0.0072 | 5.515 |

|                                                    |                      |           |     |      |          |     |      |      |      |      |      |     |      |       |        |       |        |        |       |       |        |       |        |   |        |       |
|----------------------------------------------------|----------------------|-----------|-----|------|----------|-----|------|------|------|------|------|-----|------|-------|--------|-------|--------|--------|-------|-------|--------|-------|--------|---|--------|-------|
| Serum albumin<br>OS=Bos taurus<br>GN=ALB PE=1 SV=4 | sp P02769 ALBU_BOVIN | qTALVELLk | 86% | 37.4 | 49.65192 | Ref | 0.97 | 0.64 | 0.99 | 0.81 | 0.37 | 1.4 | 0.68 | 3200  | 6320   | 5470  | 7840   | 7590   | 4880  | 10100 | 6280   | 651.4 | 1300.8 | 2 | 0.0111 | 8.511 |
| Serum albumin<br>OS=Bos taurus<br>GN=ALB PE=1 SV=4 | sp P02769 ALBU_BOVIN | qTALVELLk | 62% | 30.3 | 49.10763 | Ref | 1    | 0.54 | 0.96 | 0.87 | 0.48 | 1.1 | 0.75 | 3470  | 5550   | 4250  | 6400   | 6630   | 4430  | 6970  | 5530   | 812   | 1622   | 2 | 0.0234 | 14.43 |
| Serum albumin<br>OS=Bos taurus<br>GN=ALB PE=1 SV=4 | sp P02769 ALBU_BOVIN | qTALVELLk | 91% | 41.7 | 48.77585 | Ref | 0.76 | 0.65 | 1    | 0.9  | 0.4  | 1.4 | 0.74 | 16700 | 31500  | 31600 | 46800  | 46700  | 28700 | 58900 | 37700  | 541.7 | 1622   | 3 | 0.018  | 11.12 |
| Serum albumin<br>OS=Bos taurus<br>GN=ALB PE=1 SV=4 | sp P02769 ALBU_BOVIN | qTALVELLk | 95% | 56.8 | 48.53978 | Ref | 1    | 0.49 | 1    | 0.93 | 0.34 | 1.3 | 0.37 | 10000 | 15200  | 11400 | 18600  | 19100  | 11000 | 22200 | 11700  | 812   | 1622   | 2 | 0.013  | 8.03  |
| Serum albumin<br>OS=Bos taurus<br>GN=ALB PE=1 SV=4 | sp P02769 ALBU_BOVIN | qTALVELLk | 95% | 49.3 | 48.53558 | Ref | 0.88 | 0.52 | 0.85 | 0.87 | 0.51 | 1.4 | 0.65 | 1E+05 | 180000 | 2E+05 | 215000 | 240000 | 2E+05 | 3E+05 | 188000 | 541.7 | 1622   | 3 | 0.0118 | 7.295 |
| Serum albumin<br>OS=Bos taurus<br>GN=ALB PE=1 SV=4 | sp P02769 ALBU_BOVIN | qTALVELLk | 95% | 50.3 | 48.12914 | Ref | 0.8  | 0.44 | 1.1  | 1    | 0.23 | 1.4 | 0.68 | 33800 | 56400  | 47800 | 83700  | 89500  | 44800 | 1E+05 | 63400  | 812   | 1622   | 2 | 0.0091 | 5.627 |
| Serum albumin<br>OS=Bos taurus<br>GN=ALB PE=1 SV=4 | sp P02769 ALBU_BOVIN | qTALVELLk | 94% | 41.9 | 48.58068 | Ref | 0.87 | 0.4  | 1.1  | 0.87 | 0.33 | 1.5 | 0.63 | 6340  | 12500  | 9740  | 17800  | 16700  | 10000 | 23500 | 12800  | 812   | 1622   | 2 | 0.015  | 9.238 |

|                                                    |                      |              |     |      |          |     |                        |                               |                               |                        |                        |                                |                        |                          |                        |                               |                               |                        |                        |                                |                        |       |      |   |        |       |
|----------------------------------------------------|----------------------|--------------|-----|------|----------|-----|------------------------|-------------------------------|-------------------------------|------------------------|------------------------|--------------------------------|------------------------|--------------------------|------------------------|-------------------------------|-------------------------------|------------------------|------------------------|--------------------------------|------------------------|-------|------|---|--------|-------|
| Serum albumin<br>OS=Bos taurus<br>GN=ALB PE=1 SV=4 | sp P02769 ALBU_BOVIN | qTALVELLk    | 95% | 48.6 | 48.34885 | Ref | 0.77                   | 0.53                          | 0.92                          | 0.91                   | 0.48                   | 1.4                            | 0.61                   | 5970                     | 8060                   | 7370                          | 10800                         | 11900                  | 7720                   | 15200                          | 8720                   | 541.7 | 1622 | 3 | 0.0109 | 6.721 |
| Serum albumin<br>OS=Bos taurus<br>GN=ALB PE=1 SV=4 | sp P02769 ALBU_BOVIN | qTALVELLk    | 91% | 42.1 | 48.68451 | Ref | 0.79                   | 0.61                          | 0.88                          | 0.75                   | 0.37                   | 1.1                            | 0.73                   | 2160                     | 1960                   | 1880                          | 2550                          | 2560                   | 1720                   | 3010                           | 2280                   | 541.7 | 1622 | 3 | 0.0204 | 12.6  |
| Serum albumin<br>OS=Bos taurus<br>GN=ALB PE=1 SV=4 | sp P02769 ALBU_BOVIN | qTALVELLk    | 95% | 46.8 | 48.64298 | Ref | 0.84                   | 0.82                          | 0.82                          | 0.88                   | 0.54                   | 1.3                            | 0.63                   | 307                      | 505                    | 543                           | 606                           | 697                    | 482                    | 850                            | 533                    | 812   | 1622 | 2 | 0.0188 | 11.57 |
| Serum albumin<br>OS=Bos taurus<br>GN=ALB PE=1 SV=4 | sp P02769 ALBU_BOVIN | qTALVELLk    | 87% | 37.8 | 47.91361 | Ref | 0.86                   | 0.61                          | 1                             | 0.79                   | 0.53                   | 1.1                            | 0.57                   | 901                      | 985                    | 900                           | 1360                          | 1270                   | 920                    | 1400                           | 979                    | 541.7 | 1622 | 3 | 0.0056 | 3.45  |
| Serum albumin<br>OS=Bos taurus<br>GN=ALB PE=1 SV=4 | sp P02769 ALBU_BOVIN | qTALVELLk    | 52% | 27.6 | 47.91361 | Ref | 0.57                   | 0.29                          | 1                             | 1                      | 0.62                   | 1.2                            | 0.49                   | 360                      | 293                    | 260                           | 483                           | 542                    | 354                    | 542                            | 337                    | 541.7 | 1622 | 3 | 0.0052 | 3.228 |
| Serum albumin<br>OS=Bos taurus<br>GN=ALB PE=1 SV=4 | sp P02769 ALBU_BOVIN | rHPEYAVSVLLR | 86% | 40.3 | 53.05336 | Ref | No Values (0.75839525) | Reference Missing (0.7803382) | Reference Missing (1.2528954) | No Values (0.33362803) | No Values (0.52950037) | Reference Missing (1.14460773) | No Values (0.47760773) | No Values (0.5560053625) | No Values (0.75839525) | Reference Missing (0.7803382) | Reference Missing (1.2528954) | No Values (0.33362803) | No Values (0.52950037) | Reference Missing (1.14460773) | No Values (0.47760773) | 436.8 | 1743 | 4 | 0.0156 | 8.957 |
| Serum albumin<br>OS=Bos taurus<br>GN=ALB PE=1 SV=4 | sp P02769 ALBU_BOVIN | rHPEYAVSVLLR | 88% | 43.7 | 52.96286 | Ref | 0.99                   | 0.62                          | 0.72                          | 0.76                   | 0.78                   | 0.9                            | 0.89                   | 23100                    | 31400                  | 26300                         | 31800                         | 35900                  | 31900                  | 36100                          | 35500                  | 582   | 1743 | 3 | 0.0123 | 7.027 |

|                                                    |                      |                      |     |      |          |     |                               |                           |                              |                                |                        |                               |                              |                        |                               |                                |                              |                                |                        |                               |                              |       |       |      |        |        |       |
|----------------------------------------------------|----------------------|----------------------|-----|------|----------|-----|-------------------------------|---------------------------|------------------------------|--------------------------------|------------------------|-------------------------------|------------------------------|------------------------|-------------------------------|--------------------------------|------------------------------|--------------------------------|------------------------|-------------------------------|------------------------------|-------|-------|------|--------|--------|-------|
| Serum albumin<br>OS=Bos taurus<br>GN=ALB PE=1 SV=4 | sp P02769 ALBU_BOVIN | rHPE<br>YAVS<br>VLLR | 55% | 32.8 | 52.89486 | Ref | 0.81                          | 0.52                      | 0.73                         | 0.77                           | 0.62                   | 1.2                           | 0.89                         | 1750                   | 2080                          | 1840                           | 2380                         | 2700                           | 2140                   | 3400                          | 2660                         | 872.5 | 1743  | 2    | 0.0114 | 6.565  |       |
| Serum albumin<br>OS=Bos taurus<br>GN=ALB PE=1 SV=4 | sp P02769 ALBU_BOVIN | rHPE<br>YAVS<br>VLLR | 87% | 40.7 | 52.91511 | Ref | Reference Missing (0.9471342) | No Values (0.51765895)    | Reference Missing (1.02036)  | Reference Missing (0.78121823) | No Values (0.40645728) | Reference Missing (1.1659675) | Reference Missing (0.625999) | No Values (0.43296224) | Reference Missing (0.9471342) | Reference Missing (0.51765895) | Reference Missing (1.02036)  | Reference Missing (0.78121823) | No Values (0.40645728) | Reference Missing (1.1659675) | Reference Missing (0.625999) |       | 436.8 | 1743 | 4      | 0.0107 | 6.159 |
| Serum albumin<br>OS=Bos taurus<br>GN=ALB PE=1 SV=4 | sp P02769 ALBU_BOVIN | rHPE<br>YAVS<br>VLLR | 95% | 53.1 | 52.89618 | Ref | 0.75                          | 0.55                      | 0.99                         | 0.79                           | 0.52                   | 1.2                           | 0.92                         | 65700                  | 89600                         | 84700                          | 129000                       | 124000                         | 89400                  | 2E+05                         | 123000                       | 582   | 1743  | 3    | 0.0119 | 6.821  |       |
| Serum albumin<br>OS=Bos taurus<br>GN=ALB PE=1 SV=4 | sp P02769 ALBU_BOVIN | rHPE<br>YAVS<br>VLLR | 86% | 40.7 | 52.89455 | Ref | 0.92                          | 0.38                      | 1.1                          | 0.59                           | 0.52                   | 1.4                           | 0.87                         | 3420                   | 6150                          | 4600                           | 8380                         | 6590                           | 5480                   | 10300                         | 7220                         | 872.5 | 1743  | 2    | 0.0111 | 6.359  |       |
| Serum albumin<br>OS=Bos taurus<br>GN=ALB PE=1 SV=4 | sp P02769 ALBU_BOVIN | rHPE<br>YAVS<br>VLLR | 94% | 49.6 | 52.89555 | Ref | 0.74                          | 0.76                      | 0.93                         | 0.84                           | 0.74                   | 1.2                           | 0.59                         | 70100                  | 95400                         | 1E+05                          | 133000                       | 138000                         | 1E+05                  | 2E+05                         | 105000                       | 582   | 1743  | 3    | 0.011  | 6.288  |       |
| Serum albumin<br>OS=Bos taurus<br>GN=ALB PE=1 SV=4 | sp P02769 ALBU_BOVIN | rHPE<br>YAVS<br>VLLR | 91% | 44   | 52.90636 | Ref | 1.14                          | Value Missing (0.2982515) | 1                            | 0.58                           | 0.76                   | 0.7                           | 0.8                          | 7290                   | 8110                          | Value Missing (0.2982515)      | 9650                         | 7750                           | 7650                   | 7710                          | 8210                         | 436.8 | 1743  | 4    | 0.0105 | 6.021  |       |
| Serum albumin<br>OS=Bos taurus<br>GN=ALB PE=1 SV=4 | sp P02769 ALBU_BOVIN | rHPE<br>YAVS<br>VLLR | 86% | 40.2 | 52.86834 | Ref | No Values (0.78805345)        | No Values (0.6703601)     | Reference Missing (1.307878) | No Values (0.36328605)         | No Values (0.5591585)  | Reference Missing (1.0659491) | No Values (0.507266)         | No Values (0.58566344) | No Values (0.78805345)        | No Values (0.6703601)          | Reference Missing (1.307878) | No Values (0.36328605)         | No Values (0.5591585)  | Reference Missing (1.0659491) | No Values (0.507266)         | 436.8 | 1743  | 4    | 0.0097 | 5.54   |       |

|                                                    |                      |                      |     |      |          |     |                           |                           |                           |                           |                           |                                              |                             |                             |                           |                           |                           |                           |                           |                                              |                          |       |      |   |        |       |
|----------------------------------------------------|----------------------|----------------------|-----|------|----------|-----|---------------------------|---------------------------|---------------------------|---------------------------|---------------------------|----------------------------------------------|-----------------------------|-----------------------------|---------------------------|---------------------------|---------------------------|---------------------------|---------------------------|----------------------------------------------|--------------------------|-------|------|---|--------|-------|
| Serum albumin<br>OS=Bos taurus<br>GN=ALB PE=1 SV=4 | sp P02769 ALBU_BOVIN | rHPE<br>YAVS<br>VLLR | 95% | 53.3 | 53.05193 | Ref | 0.98                      | 0.67                      | 0.89                      | 0.59                      | 0.69                      | 1.3                                          | 0.82                        | 13500                       | 28300                     | 24900                     | 32400                     | 29000                     | 27100                     | 43000                                        | 30800                    | 582   | 1743 | 3 | 0.0154 | 8.816 |
| Serum albumin<br>OS=Bos taurus<br>GN=ALB PE=1 SV=4 | sp P02769 ALBU_BOVIN | rHPE<br>YAVS<br>VLLR | 89% | 44.6 | 52.96573 | Ref | 0.87                      | 0.81                      | 0.77                      | 0.67                      | 0.76                      | 0.95                                         | 0.72                        | 3660                        | 4100                      | 4270                      | 4670                      | 4800                      | 4470                      | 5310                                         | 4500                     | 582   | 1743 | 3 | 0.0134 | 7.664 |
| Serum albumin<br>OS=Bos taurus<br>GN=ALB PE=1 SV=4 | sp P02769 ALBU_BOVIN | rHPE<br>YAVS<br>VLLR | 93% | 46.1 | 52.96097 | Ref | 0.66                      | 0.65                      | 1.2                       | 0.7                       | 0.78                      | 0.94                                         | 0.74                        | 9140                        | 10000                     | 10800                     | 17100                     | 13700                     | 12800                     | 14900                                        | 12800                    | 436.8 | 1743 | 4 | 0.012  | 6.87  |
| Serum albumin<br>OS=Bos taurus<br>GN=ALB PE=1 SV=4 | sp P02769 ALBU_BOVIN | rHPE<br>YAVS<br>VLLR | 89% | 42.2 | 52.89455 | Ref | 1.1                       | 0.47                      | 1.1                       | 0.73                      | 0.42                      | 1.2                                          | 0.7                         | 1020                        | 2330                      | 1590                      | 2830                      | 2360                      | 1650                      | 3000                                         | 2090                     | 872.5 | 1743 | 2 | 0.0111 | 6.359 |
| Serum albumin<br>OS=Bos taurus<br>GN=ALB PE=1 SV=4 | sp P02769 ALBU_BOVIN | rHPE<br>YAVS<br>VLLR | 95% | 53.3 | 52.915   | Ref | 0.86                      | 0.73                      | 0.9                       | 0.6                       | 0.63                      | 0.97                                         | 0.71                        | 5130                        | 5180                      | 5160                      | 6500                      | 5820                      | 5200                      | 6860                                         | 5690                     | 582   | 1743 | 3 | 0.0106 | 6.081 |
| Serum albumin<br>OS=Bos taurus<br>GN=ALB PE=1 SV=4 | sp P02769 ALBU_BOVIN | rHPE<br>YAVS<br>VLLR | 90% | 42.9 | 52.88569 | Ref | No Values<br>(0.95521045) | No Values<br>(0.83751696) | No Values<br>(0.67092234) | No Values<br>(0.53044313) | No Values<br>(0.72631556) | Refer<br>ence<br>Missi<br>ng<br>(0.90417475) | No<br>Values<br>(0.6744229) | No<br>Values<br>(0.7528204) | No Values<br>(0.95521045) | No Values<br>(0.83751696) | No Values<br>(0.67092234) | No Values<br>(0.53044313) | No Values<br>(0.72631556) | Refer<br>ence<br>Missi<br>ng<br>(0.90417475) | No Values<br>(0.6744229) | 436.8 | 1743 | 4 | 0.0104 | 5.953 |
| Serum albumin<br>OS=Bos taurus<br>GN=ALB PE=1 SV=4 | sp P02769 ALBU_BOVIN | rHPE<br>YAVS<br>VLLR | 95% | 51.5 | 52.84954 | Ref | 0.88                      | 0.68                      | 0.95                      | 0.61                      | 0.67                      | 0.87                                         | 0.76                        | 2410                        | 2500                      | 2360                      | 3210                      | 2790                      | 2540                      | 3050                                         | 2810                     | 436.8 | 1743 | 4 | 0.0091 | 5.242 |



|                                                    |                      |                      |     |      |          |     |      |      |      |      |      |      |      |      |      |       |       |       |      |       |       |       |      |   |        |       |
|----------------------------------------------------|----------------------|----------------------|-----|------|----------|-----|------|------|------|------|------|------|------|------|------|-------|-------|-------|------|-------|-------|-------|------|---|--------|-------|
| Serum albumin<br>OS=Bos taurus<br>GN=ALB PE=1 SV=4 | sp P02769 ALBU_BOVIN | rHPE<br>YAVS<br>VLLR | 62% | 34   | 52.84952 | Ref | 1    | 0.58 | 1.2  | 0.74 | 0.58 | 1    | 0.62 | 893  | 1470 | 1170  | 1990  | 1610  | 1270 | 1760  | 1350  | 872.5 | 1743 | 2 | 0.009  | 5.166 |
| Serum albumin<br>OS=Bos taurus<br>GN=ALB PE=1 SV=4 | sp P02769 ALBU_BOVIN | rHPE<br>YAVS<br>VLLR | 95% | 51.2 | 52.84785 | Ref | 0.83 | 0.76 | 0.97 | 0.72 | 0.51 | 1.2  | 0.59 | 8180 | 9720 | 10100 | 13100 | 12100 | 9090 | 15100 | 10000 | 582   | 1743 | 3 | 0.0088 | 5.032 |
| Serum albumin<br>OS=Bos taurus<br>GN=ALB PE=1 SV=4 | sp P02769 ALBU_BOVIN | rHPE<br>YAVS<br>VLLR | 91% | 44.1 | 52.7987  | Ref | 0.96 | 0.57 | 1.3  | 0.42 | 0.74 | 0.78 | 0.52 | 3390 | 3880 | 3220  | 6100  | 3570  | 3900 | 4200  | 3470  | 436.8 | 1743 | 4 | 0.0072 | 4.141 |
| Serum albumin<br>OS=Bos taurus<br>GN=ALB PE=1 SV=4 | sp P02769 ALBU_BOVIN | rHPE<br>YAVS<br>VLLR | 90% | 43   | 52.96808 | Ref | 0.68 | 0.57 | 1.2  | 0.88 | 0.7  | 1    | 0.72 | 3890 | 4970 | 5000  | 8420  | 7680  | 5910 | 7820  | 6210  | 436.8 | 1743 | 4 | 0.0128 | 7.352 |
| Serum albumin<br>OS=Bos taurus<br>GN=ALB PE=1 SV=4 | sp P02769 ALBU_BOVIN | rHPE<br>YAVS<br>VLLR | 64% | 34.9 | 52.96286 | Ref | 0.87 | 0.76 | 0.77 | 0.78 | 0.66 | 0.9  | 0.68 | 983  | 978  | 985   | 1120  | 1230  | 990  | 1220  | 1040  | 582   | 1743 | 3 | 0.0123 | 7.027 |
| Serum albumin<br>OS=Bos taurus<br>GN=ALB PE=1 SV=4 | sp P02769 ALBU_BOVIN | rHPE<br>YAVS<br>VLLR | 90% | 45.5 | 52.84945 | Ref | 0.96 | 0.78 | 0.76 | 0.52 | 0.61 | 1.2  | 0.87 | 939  | 1310 | 1250  | 1390  | 1300  | 1210 | 1830  | 1490  | 582   | 1743 | 3 | 0.0095 | 5.445 |
| Serum albumin<br>OS=Bos taurus<br>GN=ALB PE=1 SV=4 | sp P02769 ALBU_BOVIN | rHPE<br>YAVS<br>VLLR | 95% | 50   | 52.79676 | Ref | 1    | 0.27 | 1.3  | 0.45 | 0.64 | 0.93 | 0.74 | 798  | 1000 | 641   | 1430  | 899   | 896  | 1140  | 997   | 436.8 | 1743 | 4 | 0.0077 | 4.416 |

|                                                    |                      |                      |     |      |          |     |                       |                        |                              |                       |                        |                        |                        |                       |                       |                        |                              |                       |                        |                        |                        |       |      |   |        |       |
|----------------------------------------------------|----------------------|----------------------|-----|------|----------|-----|-----------------------|------------------------|------------------------------|-----------------------|------------------------|------------------------|------------------------|-----------------------|-----------------------|------------------------|------------------------------|-----------------------|------------------------|------------------------|------------------------|-------|------|---|--------|-------|
| Serum albumin<br>OS=Bos taurus<br>GN=ALB PE=1 SV=4 | sp P02769 ALBU_BOVIN | rHPE<br>YAVS<br>VLLR | 88% | 43.4 | 52.79644 | Ref | 0.84                  | 0.74                   | 0.97                         | 0.63                  | 0.61                   | 1.1                    | 0.76                   | 1190                  | 1410                  | 1440                   | 1890                         | 1650                  | 1420                   | 2010                   | 1630                   | 582   | 1743 | 3 | 0.0073 | 4.189 |
| Serum albumin<br>OS=Bos taurus<br>GN=ALB PE=1 SV=4 | sp P02769 ALBU_BOVIN | rHPE<br>YAVS<br>VLLR | 60% | 33.8 | 52.80619 | Ref | 0.77                  | 0.62                   | 0.85                         | 0.76                  | 0.62                   | 1                      | 0.9                    | 3150                  | 3310                  | 3250                   | 4280                         | 4430                  | 3500                   | 4790                   | 4400                   | 582   | 1743 | 3 | 0.0071 | 4.086 |
| Serum albumin<br>OS=Bos taurus<br>GN=ALB PE=1 SV=4 | sp P02769 ALBU_BOVIN | rHPE<br>YAVS<br>VLLR | 95% | 55.6 | 52.80642 | Ref | 1.1                   | 0.61                   | 1.3                          | 0.63                  | 0.29                   | 1.4                    | 0.4                    | 3540                  | 9580                  | 7410                   | 13100                        | 9310                  | 6430                   | 14800                  | 7150                   | 582   | 1743 | 3 | 0.0069 | 3.982 |
| Serum albumin<br>OS=Bos taurus<br>GN=ALB PE=1 SV=4 | sp P02769 ALBU_BOVIN | rHPE<br>YAVS<br>VLLR | 91% | 44.2 | 52.80394 | Ref | No Values (0.8931405) | No Values (0.77544725) | Reference Missing (1.246015) | No Values (0.4683732) | No Values (0.66424567) | No Values (0.60147905) | No Values (0.61235315) | No Values (0.6907506) | No Values (0.8931405) | No Values (0.77544725) | Reference Missing (1.246015) | No Values (0.4683732) | No Values (0.66424567) | No Values (0.60147905) | No Values (0.61235315) | 436.8 | 1743 | 4 | 0.0066 | 3.774 |
| Serum albumin<br>OS=Bos taurus<br>GN=ALB PE=1 SV=4 | sp P02769 ALBU_BOVIN | rHPE<br>YAVS<br>VLLR | 94% | 50.6 | 53.05336 | Ref | 0.63                  | 0.48                   | 0.88                         | 0.61                  | 0.97                   | 1.1                    | 0.87                   | 833                   | 806                   | 787                    | 1170                         | 1070                  | 1200                   | 1320                   | 1150                   | 582   | 1743 | 3 | 0.0156 | 8.919 |
| Serum albumin<br>OS=Bos taurus<br>GN=ALB PE=1 SV=4 | sp P02769 ALBU_BOVIN | rHPE<br>YAVS<br>VLLR | 95% | 52.3 | 52.88381 | Ref | 0.99                  | 0.47                   | 1.1                          | 0.74                  | 0.4                    | 1.4                    | 0.82                   | 1540                  | 3930                  | 2970                   | 5280                         | 4420                  | 3070                   | 6200                   | 4240                   | 582   | 1743 | 3 | 0.0101 | 5.771 |
| Serum albumin<br>OS=Bos taurus<br>GN=ALB PE=1 SV=4 | sp P02769 ALBU_BOVIN | rHPE<br>YAVS<br>VLLR | 65% | 34.9 | 52.86834 | Ref | 0.75                  | 0.85                   | 0.82                         | 0.55                  | 0.74                   | 1                      | 0.88                   | 670                   | 734                   | 855                    | 938                          | 859                   | 853                    | 1070                   | 976                    | 582   | 1743 | 3 | 0.0097 | 5.565 |

|                                                    |                      |                      |     |      |          |     |                           |                          |                                  |                          |                         |                                  |                           |                           |                           |                          |                                  |                          |                         |                                  |                           |                           |        |      |        |        |       |
|----------------------------------------------------|----------------------|----------------------|-----|------|----------|-----|---------------------------|--------------------------|----------------------------------|--------------------------|-------------------------|----------------------------------|---------------------------|---------------------------|---------------------------|--------------------------|----------------------------------|--------------------------|-------------------------|----------------------------------|---------------------------|---------------------------|--------|------|--------|--------|-------|
| Serum albumin<br>OS=Bos taurus<br>GN=ALB PE=1 SV=4 | sp P02769 ALBU_BOVIN | rHPE<br>YAVS<br>VLLR | 92% | 44.3 | 52.79676 | Ref | No Values<br>(0.84973884) | No Values<br>(0.7320455) | Reference Missing<br>(1.0015075) | No Values<br>(0.4249715) | No Values<br>(0.620844) | Reference Missing<br>(1.1202927) | No Values<br>(0.56895137) | No Values<br>(0.64734876) | No Values<br>(0.84973884) | No Values<br>(0.7320455) | Reference Missing<br>(1.0015075) | No Values<br>(0.4249715) | No Values<br>(0.620844) | Reference Missing<br>(1.1202927) | No Values<br>(0.56895137) | No Values<br>(0.64734876) | 436.8  | 1743 | 4      | 0.0077 | 4.416 |
| Serum albumin<br>OS=Bos taurus<br>GN=ALB PE=1 SV=4 | sp P02769 ALBU_BOVIN | rHPE<br>YAVS<br>VLLR | 90% | 42.5 | 52.80619 | Ref | 0.85                      | 0.93                     | 1.3                              | 0.39                     | 0.51                    | 0.85                             | 0.63                      | 352                       | 418                       | 479                      | 697                              | 407                      | 387                     | 512                              | 435                       | 436.8                     | 1743   | 4    | 0.0071 | 4.049  |       |
| Serum albumin<br>OS=Bos taurus<br>GN=ALB PE=1 SV=4 | sp P02769 ALBU_BOVIN | rHPE<br>YAVS<br>VLLR | 90% | 42.6 | 52.80642 | Ref | 0.73                      | 0.8                      | 1                                | 0.56                     | 0.99                    | 0.56                             | 0.56                      | 263                       | 221                       | 251                      | 329                              | 263                      | 308                     | 239                              | 238                       | 436.8                     | 1743   | 4    | 0.0069 | 3.98   |       |
| Serum albumin<br>OS=Bos taurus<br>GN=ALB PE=1 SV=4 | sp P02769 ALBU_BOVIN | rHPE<br>YAVS<br>VLLR | 85% | 34.4 | 51.48344 | Ref | 0.98                      | 0.69                     | 0.65                             | 0.77                     | 0.88                    | 0.98                             | 0.63                      | 618                       | 785                       | 698                      | 759                              | 914                      | 858                     | 960                              | 751                       | 410.4                     | 2047.2 | 5    | 0.0141 | 6.903  |       |
| Serum albumin<br>OS=Bos taurus<br>GN=ALB PE=1 SV=4 | sp P02769 ALBU_BOVIN | rHPE<br>YAVS<br>VLLR | 86% | 35.3 | 51.48344 | Ref | 0.82                      | 0.67                     | 1.2                              | 0.89                     | 0.26                    | 1.2                              | 0.58                      | 54600                     | 77600                     | 76100                    | 122000                           | 109000                   | 61700                   | 1E+05                            | 80100                     | 410.4                     | 2047.2 | 5    | 0.0141 | 6.903  |       |
| Serum albumin<br>OS=Bos taurus<br>GN=ALB PE=1 SV=4 | sp P02769 ALBU_BOVIN | rHPE<br>YAVS<br>VLLR | 61% | 27.4 | 51.46615 | Ref | 0.84                      | 0.45                     | 1.2                              | 0.91                     | 0.68                    | 1                                | 0.69                      | 1850                      | 2880                      | 2370                     | 4410                             | 4040                     | 3010                    | 4020                             | 3130                      | 410.4                     | 2047.2 | 5    | 0.0137 | 6.684  |       |
| Serum albumin<br>OS=Bos taurus<br>GN=ALB PE=1 SV=4 | sp P02769 ALBU_BOVIN | rHPE<br>YAVS<br>VLLR | 66% | 28.1 | 51.4014  | Ref | 0.81                      | 0.52                     | 1.2                              | 0.9                      | 0.42                    | 1.2                              | 0.66                      | 8590                      | 14000                     | 12500                    | 22400                            | 20100                    | 12500                   | 23300                            | 15400                     | 410.4                     | 2047.2 | 5    | 0.0121 | 5.927  |       |

|                                                    |                      |                              |     |      |          |     |      |      |      |      |      |     |      |       |       |       |       |       |       |       |       |       |        |   |        |       |
|----------------------------------------------------|----------------------|------------------------------|-----|------|----------|-----|------|------|------|------|------|-----|------|-------|-------|-------|-------|-------|-------|-------|-------|-------|--------|---|--------|-------|
| Serum albumin<br>OS=Bos taurus<br>GN=ALB PE=1 SV=4 | sp P02769 ALBU_BOVIN | rHPE<br>YAVS<br>VLLR         | 73% | 29.9 | 51.3963  | Ref | 0.68 | 0.57 | 1.3  | 0.59 | 0.94 | 1.1 | 0.56 | 654   | 893   | 898   | 1620  | 1120  | 1250  | 1490  | 995   | 410.4 | 2047.2 | 5 | 0.0088 | 4.291 |
| Serum albumin<br>OS=Bos taurus<br>GN=ALB PE=1 SV=4 | sp P02769 ALBU_BOVIN | rHPY<br>FYAP<br>ELLY<br>YANK | 74% | 33.7 | 55.08855 | Ref | 0.77 | 0.52 | 0.85 | 0.79 | 0.41 | 1.6 | 0.59 | 755   | 1180  | 1080  | 1510  | 1610  | 1070  | 2630  | 1260  | 531.5 | 2652.4 | 5 | 0.02   | 7.556 |
| Serum albumin<br>OS=Bos taurus<br>GN=ALB PE=1 SV=4 | sp P02769 ALBU_BOVIN | rHPY<br>FYAP<br>ELLY<br>YANK | 71% | 32.9 | 55.04578 | Ref | 0.88 | 0.92 | 0.6  | 0.65 | 0.35 | 1.7 | 0.39 | 522   | 885   | 989   | 893   | 1020  | 718   | 1910  | 770   | 531.5 | 2652.4 | 5 | 0.0121 | 4.56  |
| Serum albumin<br>OS=Bos taurus<br>GN=ALB PE=1 SV=4 | sp P02769 ALBU_BOVIN | RHPy<br>FYAP<br>ELLY<br>YANK | 76% | 39.8 | 55.09037 | Ref | 0.91 | 0.53 | 0.81 | 0.77 | 0.62 | 1.3 | 0.77 | 424   | 661   | 551   | 749   | 802   | 631   | 1070  | 727   | 885.1 | 2652.4 | 3 | 0.0162 | 6.115 |
| Serum albumin<br>OS=Bos taurus<br>GN=ALB PE=1 SV=4 | sp P02769 ALBU_BOVIN | RHPy<br>FYAP<br>ELLY<br>YANK | 55% | 35.2 | 55.00051 | Ref | 1.1  | 0.76 | 1    | 0.57 | 0.48 | 1.1 | 0.65 | 148   | 250   | 211   | 286   | 229   | 189   | 297   | 220   | 885.1 | 2652.4 | 3 | 0.0056 | 2.113 |
| Serum albumin<br>OS=Bos taurus<br>GN=ALB PE=1 SV=4 | sp P02769 ALBU_BOVIN | RHPy<br>FYAP<br>ELLY<br>YANK | 52% | 32.9 | 55.08255 | Ref | 0.89 | 0.54 | 1    | 0.58 | 0.4  | 1.2 | 0.85 | 207   | 266   | 227   | 356   | 287   | 222   | 411   | 313   | 664.1 | 2652.4 | 4 | 0.016  | 6.02  |
| Serum albumin<br>OS=Bos taurus<br>GN=ALB PE=1 SV=4 | sp P02769 ALBU_BOVIN | sHcl<br>AEVE<br>k            | 77% | 37.7 | 52.59061 | Ref | 0.92 | 0.63 | 0.87 | 0.87 | 0.37 | 1.3 | 0.51 | 24600 | 30000 | 26700 | 35300 | 38900 | 23900 | 46400 | 27400 | 557.3 | 1668.9 | 3 | 0.0133 | 7.991 |

|                                                    |                      |                      |     |      |          |     |      |      |      |      |      |     |      |       |       |       |        |        |       |       |       |       |        |   |        |       |
|----------------------------------------------------|----------------------|----------------------|-----|------|----------|-----|------|------|------|------|------|-----|------|-------|-------|-------|--------|--------|-------|-------|-------|-------|--------|---|--------|-------|
| Serum albumin<br>OS=Bos taurus<br>GN=ALB PE=1 SV=4 | sp P02769 ALBU_BOVIN | sHCl<br>AEVE<br>k    | 95% | 51.4 | 52.27771 | Ref | 0.99 | 0.76 | 0.88 | 0.63 | 0.43 | 1.2 | 0.67 | 2590  | 3560  | 3290  | 4020   | 3730   | 2830  | 5020  | 3460  | 835.4 | 1668.9 | 2 | 0.0233 | 13.95 |
| Serum albumin<br>OS=Bos taurus<br>GN=ALB PE=1 SV=4 | sp P02769 ALBU_BOVIN | sHCl<br>AEVE<br>k    | 95% | 47.7 | 52.47995 | Ref | 0.99 | 0.72 | 0.86 | 0.84 | 0.41 | 1.2 | 0.62 | 2650  | 3990  | 3600  | 4440   | 4830   | 3130  | 5690  | 3760  | 835.4 | 1668.9 | 2 | 0.0215 | 12.86 |
| Serum albumin<br>OS=Bos taurus<br>GN=ALB PE=1 SV=4 | sp P02769 ALBU_BOVIN | sHCl<br>AEVE<br>k    | 84% | 40.9 | 52.59781 | Ref | 1.1  | 0.61 | 1.1  | 0.9  | 0.39 | 1.2 | 0.47 | 49300 | 96400 | 74200 | 116000 | 112000 | 68700 | 1E+05 | 75000 | 557.3 | 1668.9 | 3 | 0.0139 | 8.332 |
| Serum albumin<br>OS=Bos taurus<br>GN=ALB PE=1 SV=4 | sp P02769 ALBU_BOVIN | sHCl<br>AEVE<br>k    | 89% | 41.4 | 52.58592 | Ref | 0.97 | 0.63 | 0.96 | 0.74 | 0.5  | 1.3 | 0.53 | 11300 | 17600 | 15200 | 21300  | 20200  | 14900 | 27600 | 15800 | 418.2 | 1668.9 | 4 | 0.0132 | 7.905 |
| Serum albumin<br>OS=Bos taurus<br>GN=ALB PE=1 SV=4 | sp P02769 ALBU_BOVIN | sHCl<br>AEVE<br>k    | 60% | 33.7 | 52.61831 | Ref | 0.97 | 0.79 | 0.85 | 0.75 | 0.4  | 1.1 | 0.53 | 56700 | 66500 | 63400 | 74200  | 76700  | 52500 | 90500 | 59600 | 557.3 | 1668.9 | 3 | 0.0126 | 7.56  |
| Serum albumin<br>OS=Bos taurus<br>GN=ALB PE=1 SV=4 | sp P02769 ALBU_BOVIN | sLHT<br>LFGD<br>ELck | 73% | 37.9 | 53.93122 | Ref | 0.76 | 0.43 | 0.96 | 0.88 | 0.6  | 1.2 | 0.86 | 13900 | 19700 | 17100 | 27700  | 28800  | 20600 | 33600 | 25700 | 673   | 2016   | 3 | 0.0182 | 9.011 |
| Serum albumin<br>OS=Bos taurus<br>GN=ALB PE=1 SV=4 | sp P02769 ALBU_BOVIN | sLHT<br>LFGD<br>ELck | 95% | 57.4 | 53.91089 | Ref | 0.98 | 0.4  | 1.1  | 0.79 | 0.47 | 1.4 | 0.66 | 1950  | 4280  | 3110  | 5880   | 5030   | 3520  | 6920  | 4190  | 1009  | 2016   | 2 | 0.0163 | 8.101 |

|                                                    |                              |                           |     |      |          |     |      |      |      |      |      |     |      |      |       |       |       |       |       |       |       |       |        |   |        |       |
|----------------------------------------------------|------------------------------|---------------------------|-----|------|----------|-----|------|------|------|------|------|-----|------|------|-------|-------|-------|-------|-------|-------|-------|-------|--------|---|--------|-------|
| Serum albumin<br>OS=Bos taurus<br>GN=ALB PE=1 SV=4 | sp P0276<br>9 ALBU_B<br>OVIN | sLHT<br>LFGD<br>ELck      | 94% | 51.9 | 53.93924 | Ref | 0.82 | 0.57 | 1.1  | 0.75 | 0.52 | 1.3 | 0.73 | 3150 | 5490  | 5010  | 8060  | 7010  | 5220  | 9650  | 6250  | 673   | 2016   | 3 | 0.0172 | 8.55  |
| Serum albumin<br>OS=Bos taurus<br>GN=ALB PE=1 SV=4 | sp P0276<br>9 ALBU_B<br>OVIN | sLHT<br>LFGD<br>ELck      | 95% | 64.3 | 53.90707 | Ref | 1.1  | 0.37 | 1    | 0.72 | 0.38 | 1.4 | 0.81 | 1300 | 3040  | 1970  | 3480  | 3110  | 2140  | 4470  | 3010  | 1009  | 2016   | 2 | 0.0167 | 8.28  |
| Serum albumin<br>OS=Bos taurus<br>GN=ALB PE=1 SV=4 | sp P0276<br>9 ALBU_B<br>OVIN | sLHT<br>LFGD<br>ELck      | 94% | 52   | 53.99186 | Ref | 0.91 | 0.5  | 1.1  | 0.83 | 0.5  | 1.3 | 0.67 | 4640 | 7730  | 6310  | 10700 | 9820  | 6800  | 12000 | 7950  | 673   | 2016.1 | 3 | 0.0121 | 6.022 |
| Serum albumin<br>OS=Bos taurus<br>GN=ALB PE=1 SV=4 | sp P0276<br>9 ALBU_B<br>OVIN | sLHT<br>LFGD<br>ELck      | 94% | 51.4 | 54.00526 | Ref | 0.86 | 0.58 | 1    | 0.87 | 0.56 | 1.2 | 0.67 | 1240 | 1880  | 1680  | 2520  | 2540  | 1790  | 2930  | 1990  | 673   | 2016.1 | 3 | 0.0127 | 6.29  |
| Serum albumin<br>OS=Bos taurus<br>GN=ALB PE=1 SV=4 | sp P0276<br>9 ALBU_B<br>OVIN | TcVA<br>DES<br>HAG<br>cEk | 95% | 58.9 | 41.81758 | Ref | 0.83 | 0.45 | 0.97 | 0.98 | 0.57 | 1.4 | 0.63 | 2290 | 4250  | 3560  | 5720  | 6340  | 4170  | 7710  | 4490  | 873.4 | 1744.7 | 2 | 0.0134 | 7.681 |
| Serum albumin<br>OS=Bos taurus<br>GN=ALB PE=1 SV=4 | sp P0276<br>9 ALBU_B<br>OVIN | tcVA<br>DES<br>HAG<br>cEk | 95% | 56.9 | 47.82473 | Ref | 0.86 | 0.68 | 1    | 0.87 | 0.49 | 1.3 | 0.57 | 5750 | 10300 | 9930  | 14100 | 14000 | 9420  | 17800 | 10300 | 1025  | 2048.9 | 2 | 0.0177 | 8.62  |
| Serum albumin<br>OS=Bos taurus<br>GN=ALB PE=1 SV=4 | sp P0276<br>9 ALBU_B<br>OVIN | tcVA<br>DES<br>HAG<br>cEk | 95% | 61.5 | 47.40568 | Ref | 0.72 | 0.57 | 1.1  | 0.96 | 0.45 | 1.4 | 0.61 | 9270 | 15900 | 15500 | 25100 | 25200 | 15400 | 30800 | 17800 | 1025  | 2048.9 | 2 | 0.0245 | 11.96 |

|                                                    |                              |                           |     |      |          |     |      |      |      |      |       |     |      |       |       |       |       |       |       |       |       |      |        |   |        |       |
|----------------------------------------------------|------------------------------|---------------------------|-----|------|----------|-----|------|------|------|------|-------|-----|------|-------|-------|-------|-------|-------|-------|-------|-------|------|--------|---|--------|-------|
| Serum albumin<br>OS=Bos taurus<br>GN=ALB PE=1 SV=4 | sp P0276<br>9 ALBU_B<br>OVIN | tcVA<br>DES<br>HAG<br>cEk | 92% | 42.1 | 47.69111 | Ref | 0.87 | 0.61 | 1.1  | 0.99 | 0.092 | 1.3 | 0.71 | 35700 | 63900 | 57800 | 91100 | 93200 | 43700 | 1E+05 | 69200 | 684  | 2048.9 | 3 | 0.0197 | 9.609 |
| Serum albumin<br>OS=Bos taurus<br>GN=ALB PE=1 SV=4 | sp P0276<br>9 ALBU_B<br>OVIN | tcVA<br>DES<br>HAG<br>cEk | 95% | 47.4 | 47.75836 | Ref | 0.87 | 0.44 | 0.99 | 0.88 | 0.54  | 1.2 | 0.78 | 12100 | 17800 | 14400 | 23600 | 24200 | 16600 | 27600 | 20400 | 684  | 2048.9 | 3 | 0.0188 | 9.169 |
| Serum albumin<br>OS=Bos taurus<br>GN=ALB PE=1 SV=4 | sp P0276<br>9 ALBU_B<br>OVIN | tcVA<br>DES<br>HAG<br>cEk | 91% | 41   | 47.76745 | Ref | 0.72 | 0.66 | 1.1  | 0.87 | 0.5   | 1.3 | 0.58 | 21500 | 29800 | 31100 | 47000 | 44400 | 29900 | 54100 | 32900 | 684  | 2048.9 | 3 | 0.0184 | 8.979 |
| Serum albumin<br>OS=Bos taurus<br>GN=ALB PE=1 SV=4 | sp P0276<br>9 ALBU_B<br>OVIN | tcVA<br>DES<br>HAG<br>cEk | 89% | 38.9 | 47.95971 | Ref | 0.89 | 0.51 | 1    | 0.89 | 0.38  | 1.3 | 0.74 | 15900 | 26100 | 21700 | 34400 | 35100 | 21500 | 42800 | 28500 | 684  | 2048.9 | 3 | 0.0153 | 7.472 |
| Serum albumin<br>OS=Bos taurus<br>GN=ALB PE=1 SV=4 | sp P0276<br>9 ALBU_B<br>OVIN | tVM<br>ENFV<br>AFV<br>Dk  | 95% | 70.8 | 53.95416 | Ref | 0.76 | 0.5  | 1.1  | 0.92 | 0.39  | 1.4 | 0.75 | 7830  | 13300 | 12100 | 19900 | 20000 | 12100 | 25400 | 16100 | 1005 | 2007.1 | 2 | 0.0198 | 9.836 |
| Serum albumin<br>OS=Bos taurus<br>GN=ALB PE=1 SV=4 | sp P0276<br>9 ALBU_B<br>OVIN | tVM<br>ENFV<br>AFV<br>Dk  | 95% | 68.1 | 53.92815 | Ref | 0.68 | 0.68 | 1.1  | 1    | 0.19  | 1.4 | 0.69 | 2230  | 3920  | 4260  | 6390  | 6700  | 3290  | 7980  | 4820  | 1005 | 2007.1 | 2 | 0.0166 | 8.252 |
| Serum albumin<br>OS=Bos taurus<br>GN=ALB PE=1 SV=4 | sp P0276<br>9 ALBU_B<br>OVIN | tVM<br>ENFV<br>AFV<br>Dk  | 95% | 54.7 | 53.96498 | Ref | 0.88 | 0.58 | 1.1  | 0.97 | 0.23  | 1.4 | 0.7  | 373   | 761   | 672   | 1060  | 1080  | 567   | 1310  | 818   | 1005 | 2007.1 | 2 | 0.015  | 7.465 |

|                                                    |                      |                          |     |      |          |     |      |      |      |      |      |     |      |       |       |       |       |       |       |       |       |       |        |   |        |       |
|----------------------------------------------------|----------------------|--------------------------|-----|------|----------|-----|------|------|------|------|------|-----|------|-------|-------|-------|-------|-------|-------|-------|-------|-------|--------|---|--------|-------|
| Serum albumin<br>OS=Bos taurus<br>GN=ALB PE=1 SV=4 | sp P02769 ALBU_BOVIN | tVM<br>ENFV<br>AFV<br>Dk | 95% | 66.9 | 53.90158 | Ref | 0.87 | 0.53 | 1.1  | 0.92 | 0.29 | 1.3 | 0.66 | 544   | 988   | 848   | 1440  | 1370  | 776   | 1680  | 1040  | 1005  | 2007.1 | 2 | 0.0123 | 6.131 |
| Serum albumin<br>OS=Bos taurus<br>GN=ALB PE=1 SV=4 | sp P02769 ALBU_BOVIN | tVM<br>ENFV<br>AFV<br>Dk | 64% | 35.3 | 53.91274 | Ref | 0.88 | 0.49 | 1.1  | 0.79 | 0.42 | 1.4 | 0.52 | 197   | 287   | 237   | 411   | 362   | 244   | 492   | 272   | 1005  | 2007.1 | 2 | 0.0107 | 5.334 |
| Serum albumin<br>OS=Bos taurus<br>GN=ALB PE=1 SV=4 | sp P02769 ALBU_BOVIN | tVM<br>ENFV<br>AFV<br>Dk | 95% | 53.2 | 53.8483  | Ref | 0.73 | 0.8  | 0.6  | 0.78 | 0.53 | 1   | 1.2  | 278   | 356   | 407   | 397   | 495   | 364   | 542   | 595   | 670   | 2007.1 | 3 | 0.006  | 2.977 |
| Serum albumin<br>OS=Bos taurus<br>GN=ALB PE=1 SV=4 | sp P02769 ALBU_BOVIN | tVm<br>ENFV<br>AFV<br>Dk | 95% | 54.4 | 53.89095 | Ref | 0.88 | 0.6  | 0.92 | 0.85 | 0.34 | 1.2 | 0.99 | 14900 | 25200 | 22600 | 31700 | 33200 | 20300 | 38900 | 33100 | 675.4 | 2023.1 | 3 | 0.0169 | 8.37  |
| Serum albumin<br>OS=Bos taurus<br>GN=ALB PE=1 SV=4 | sp P02769 ALBU_BOVIN | tVm<br>ENFV<br>AFV<br>Dk | 95% | 66.7 | 53.953   | Ref | 0.83 | 0.52 | 0.99 | 0.9  | 0.28 | 1.3 | 1    | 11300 | 22100 | 19300 | 30000 | 31100 | 17700 | 37000 | 31200 | 675.4 | 2023.1 | 3 | 0.0131 | 6.473 |
| Serum albumin<br>OS=Bos taurus<br>GN=ALB PE=1 SV=4 | sp P02769 ALBU_BOVIN | tVm<br>ENFV<br>AFV<br>Dk | 91% | 45.2 | 53.96895 | Ref | 0.92 | 0.54 | 0.89 | 0.85 | 0.66 | 1.2 | 0.76 | 1630  | 2700  | 2240  | 3200  | 3440  | 2630  | 4010  | 2940  | 1013  | 2023.1 | 2 | 0.01   | 4.934 |
| Serum albumin<br>OS=Bos taurus<br>GN=ALB PE=1 SV=4 | sp P02769 ALBU_BOVIN | tVm<br>ENFV<br>AFV<br>Dk | 67% | 36.4 | 53.94495 | Ref | 0.63 | 0.56 | 0.99 | 0.87 | 0.38 | 1.2 | 1.2  | 1380  | 1890  | 1960  | 2970  | 3010  | 1870  | 3340  | 3300  | 675.4 | 2023.1 | 3 | 0.0111 | 5.48  |



|                                                    |                              |                                   |     |      |          |     |      |      |      |      |      |      |      |       |       |       |       |       |       |       |       |       |        |   |        |       |
|----------------------------------------------------|------------------------------|-----------------------------------|-----|------|----------|-----|------|------|------|------|------|------|------|-------|-------|-------|-------|-------|-------|-------|-------|-------|--------|---|--------|-------|
| Serum albumin<br>OS=Bos taurus<br>GN=ALB PE=1 SV=4 | sp P0276<br>9 ALBU_B<br>OVIN | tVm<br>ENFV<br>AFV<br>Dk          | 65% | 36   | 53.93235 | Ref | 0.9  | 0.45 | 0.97 | 0.8  | 0.67 | 0.83 | 0.94 | 2960  | 3590  | 2850  | 4590  | 4480  | 3580  | 4180  | 4480  | 675.4 | 2023.1 | 3 | 0.0124 | 6.117 |
| Serum albumin<br>OS=Bos taurus<br>GN=ALB PE=1 SV=4 | sp P0276<br>9 ALBU_B<br>OVIN | tVm<br>ENFV<br>AFV<br>Dk          | 89% | 45.4 | 53.92243 | Ref | 0.83 | 0.57 | 0.93 | 0.78 | 0.67 | 1    | 0.87 | 1900  | 2360  | 2130  | 3070  | 3050  | 2470  | 3230  | 2930  | 675.4 | 2023.1 | 3 | 0.0106 | 5.213 |
| Serum albumin<br>OS=Bos taurus<br>GN=ALB PE=1 SV=4 | sp P0276<br>9 ALBU_B<br>OVIN | tVM<br>EnFV<br>AFV<br>Dk          | 95% | 60.6 | 53.82523 | Ref | 0.72 | 0.59 | 0.96 | 1    | 0.53 | 1.2  | 0.64 | 9610  | 12000 | 11900 | 17200 | 19700 | 12300 | 20300 | 13800 | 1005  | 2008.1 | 2 | 0.0232 | 11.53 |
| Serum albumin<br>OS=Bos taurus<br>GN=ALB PE=1 SV=4 | sp P0276<br>9 ALBU_B<br>OVIN | tVM<br>EnFV<br>AFV<br>Dk          | 95% | 53.6 | 53.8184  | Ref | 0.76 | 0.71 | 1    | 0.95 | 0.39 | 1.2  | 0.8  | 18200 | 29600 | 31000 | 43300 | 45400 | 27000 | 50000 | 37100 | 670.4 | 2008.1 | 3 | 0.0163 | 8.132 |
| Serum albumin<br>OS=Bos taurus<br>GN=ALB PE=1 SV=4 | sp P0276<br>9 ALBU_B<br>OVIN | tVM<br>EnFV<br>AFV<br>Dk          | 84% | 41.8 | 53.8488  | Ref | 0.72 | 0.43 | 0.96 | 0.77 | 0.46 | 1.1  | 1.2  | 5020  | 6410  | 5690  | 9240  | 8960  | 6290  | 10600 | 10500 | 670.4 | 2008.1 | 3 | 0.0121 | 6.042 |
| Serum albumin<br>OS=Bos taurus<br>GN=ALB PE=1 SV=4 | sp P0276<br>9 ALBU_B<br>OVIN | tVm<br>EnFV<br>AFV<br>Dk          | 84% | 41.8 | 53.89836 | Ref | 0.95 | 0.77 | 0.8  | 0.5  | 0.75 | 0.8  | 0.76 | 3840  | 3880  | 3710  | 4250  | 3800  | 3950  | 4280  | 4140  | 675.7 | 2024.1 | 3 | 0.0129 | 6.385 |
| Serum albumin<br>OS=Bos taurus<br>GN=ALB PE=1 SV=4 | sp P0276<br>9 ALBU_B<br>OVIN | vHkE<br>ccHG<br>DLLE<br>cAD<br>DR | 66% | 28.5 | 48.09345 | Ref | 0.7  | 0.48 | 0.87 | 0.87 | 0.58 | 1.1  | 0.91 | 9570  | 9580  | 8920  | 13200 | 14500 | 10300 | 15300 | 13500 | 673   | 2688.2 | 4 | 0.0194 | 7.211 |

|                                                    |                      |                      |     |      |          |     |      |      |      |      |      |     |      |       |         |       |        |         |       |       |         |      |      |   |        |       |
|----------------------------------------------------|----------------------|----------------------|-----|------|----------|-----|------|------|------|------|------|-----|------|-------|---------|-------|--------|---------|-------|-------|---------|------|------|---|--------|-------|
| Serum albumin<br>OS=Bos taurus<br>GN=ALB PE=1 SV=4 | sp P02769 ALBU_BOVIN | ylcD<br>NQD<br>TISSk | 90% | 44.6 | 52.43891 | Ref | 0.89 | 0.24 | 0.86 | 1.3  | 0.44 | 1.3 | 0.74 | 58600 | 106000  | 73500 | 127000 | 184000  | 91000 | 2E+05 | 116000  | 681  | 2040 | 3 | 0.0173 | 8.462 |
| Serum albumin<br>OS=Bos taurus<br>GN=ALB PE=1 SV=4 | sp P02769 ALBU_BOVIN | ylcD<br>NQD<br>TISSk | 95% | 51.1 | 52.42701 | Ref | 0.98 | 0.46 | 1.1  | 0.95 | 0.13 | 1.5 | 0.56 | 4E+05 | 1120000 | 8E+05 | 2E+06  | 1470000 | 7E+05 | 2E+06 | 1010000 | 681  | 2040 | 3 | 0.0156 | 7.653 |
| Serum albumin<br>OS=Bos taurus<br>GN=ALB PE=1 SV=4 | sp P02769 ALBU_BOVIN | ylcD<br>NQD<br>TISSk | 95% | 57.6 | 52.38565 | Ref | 0.93 | 0.51 | 0.94 | 0.97 | 0.51 | 1.2 | 0.77 | 47000 | 87300   | 70500 | 107000 | 121000  | 76400 | 1E+05 | 94600   | 681  | 2040 | 3 | 0.0196 | 9.623 |
| Serum albumin<br>OS=Bos taurus<br>GN=ALB PE=1 SV=4 | sp P02769 ALBU_BOVIN | ylcD<br>NQD<br>TISSk | 95% | 52.8 | 52.41185 | Ref | 0.84 | 0.59 | 0.96 | 0.79 | 0.59 | 1.1 | 0.77 | 2370  | 2920    | 2660  | 3860   | 3770    | 2870  | 4230  | 3380    | 681  | 2040 | 3 | 0.0158 | 7.742 |
| Serum albumin<br>OS=Bos taurus<br>GN=ALB PE=1 SV=4 | sp P02769 ALBU_BOVIN | ylcD<br>NQD<br>TISSk | 95% | 60.7 | 52.34008 | Ref | 0.97 | 0.52 | 0.85 | 0.95 | 0.35 | 1.5 | 0.7  | 25200 | 54900   | 43500 | 61500  | 72300   | 41700 | 94400 | 55300   | 1021 | 2040 | 2 | 0.0169 | 8.302 |
| Serum albumin<br>OS=Bos taurus<br>GN=ALB PE=1 SV=4 | sp P02769 ALBU_BOVIN | ylcD<br>NQD<br>TISSk | 95% | 71.5 | 52.34649 | Ref | 0.66 | 0.56 | 1.1  | 0.99 | 0.33 | 1.5 | 0.71 | 77300 | 152000  | 2E+05 | 254000 | 259000  | 1E+05 | 3E+05 | 192000  | 1021 | 2040 | 2 | 0.0167 | 8.185 |
| Serum albumin<br>OS=Bos taurus<br>GN=ALB PE=1 SV=4 | sp P02769 ALBU_BOVIN | ylcD<br>NQD<br>TISSk | 83% | 38.8 | 52.42506 | Ref | 0.7  | 0.8  | 0.88 | 0.9  | 0.48 | 1.3 | 0.66 | 6740  | 8520    | 9910  | 11800  | 13200   | 8550  | 15400 | 10100   | 1021 | 2040 | 2 | 0.0149 | 7.283 |

|                                                    |                      |                      |     |      |          |     |      |      |      |      |       |      |      |       |       |       |       |        |       |       |       |       |        |   |        |       |
|----------------------------------------------------|----------------------|----------------------|-----|------|----------|-----|------|------|------|------|-------|------|------|-------|-------|-------|-------|--------|-------|-------|-------|-------|--------|---|--------|-------|
| Serum albumin<br>OS=Bos taurus<br>GN=ALB PE=1 SV=4 | sp P02769 ALBU_BOVIN | ylcD<br>nQD<br>TISSk | 95% | 71.5 | 52.34024 | Ref | 0.75 | 0.63 | 1.1  | 0.93 | 0.29  | 1.3  | 0.68 | 4150  | 6800  | 6810  | 10800 | 10400  | 5790  | 12600 | 7910  | 1021  | 2040   | 2 | 0.0171 | 8.361 |
| Serum albumin<br>OS=Bos taurus<br>GN=ALB PE=1 SV=4 | sp P02769 ALBU_BOVIN | ylcD<br>nQD<br>TISSk | 65% | 36.5 | 54.46487 | Ref | 0.82 | 0.56 | 1    | 0.83 | 0.38  | 1.3  | 0.6  | 11600 | 14300 | 12900 | 19700 | 19200  | 12300 | 24800 | 14800 | 782.4 | 2344.2 | 3 | 0.0201 | 8.56  |
| Serum albumin<br>OS=Bos taurus<br>GN=ALB PE=1 SV=4 | sp P02769 ALBU_BOVIN | ylcD<br>nQD<br>TISSk | 95% | 61.6 | 51.75628 | Ref | 1.1  | 0.59 | 1.1  | 1.1  | -0.03 | 1.3  | 0.66 | 31500 | 80100 | 60500 | 93100 | 106000 | 42200 | 1E+05 | 70900 | 681.3 | 2041   | 3 | 0.0165 | 8.095 |
| Serum albumin<br>OS=Bos taurus<br>GN=ALB PE=1 SV=4 | sp P02769 ALBU_BOVIN | ylcD<br>nQD<br>TISSk | 52% | 31.5 | 51.75137 | Ref | 0.84 | 0.94 | 0.83 | 0.72 | 0.48  | 0.93 | 0.69 | 11100 | 11300 | 13100 | 13600 | 14000  | 10300 | 14800 | 12400 | 681.3 | 2041   | 3 | 0.0163 | 8.007 |
| Serum albumin<br>OS=Bos taurus<br>GN=ALB PE=1 SV=4 | sp P02769 ALBU_BOVIN | ylcD<br>nQD<br>TISSk | 91% | 42.2 | 51.74458 | Ref | 0.87 | 0.39 | 1.1  | 1.1  | 0.24  | 1.4  | 0.66 | 10100 | 21900 | 17000 | 31600 | 34100  | 16600 | 39000 | 23100 | 1021  | 2041   | 2 | 0.0191 | 9.37  |
| Serum albumin<br>OS=Bos taurus<br>GN=ALB PE=1 SV=4 | sp P02769 ALBU_BOVIN | ylcD<br>nQD<br>TISSk | 95% | 56.7 | 51.81303 | Ref | 0.91 | 0.18 | 1    | 0.97 | 0.083 | 1.5  | 0.9  | 14100 | 30500 | 20000 | 40500 | 42600  | 20200 | 57100 | 36900 | 1021  | 2041   | 2 | 0.0176 | 8.596 |
| Serum albumin<br>OS=Bos taurus<br>GN=ALB PE=1 SV=4 | sp P02769 ALBU_BOVIN | ylYEI<br>AR          | 55% | 30.9 | 50.63187 | Ref | 1    | 0.69 | 1    | 0.67 | 0.39  | 1.4  | 0.56 | 3500  | 6400  | 5560  | 7920  | 6760   | 4880  | 9980  | 5670  | 411.2 | 1230.7 | 3 | 0.0093 | 7.523 |

|                                                               |                                               |                            |     |      |          |     |      |      |      |       |       |      |       |       |         |       |        |         |       |       |         |       |        |   |        |       |
|---------------------------------------------------------------|-----------------------------------------------|----------------------------|-----|------|----------|-----|------|------|------|-------|-------|------|-------|-------|---------|-------|--------|---------|-------|-------|---------|-------|--------|---|--------|-------|
| Serum albumin<br>OS=Bos taurus<br>GN=ALB PE=1 SV=4            | sp P02769 ALBU_BOVIN                          | ynG<br>VFQ<br>EccQ<br>AEDk | 76% | 32   | 47.09533 | Ref | 0.9  | 0.83 | 0.91 | 0.73  | 0.5   | 1.1  | 0.62  | 963   | 1200    | 1240  | 1470   | 1430    | 1070  | 1680  | 1200    | 779   | 2334   | 3 | 0.0145 | 6.195 |
| Serum albumin<br>OS=Bos taurus<br>GN=ALB PE=1 SV=4            | sp P02769 ALBU_BOVIN                          | ynG<br>VFQ<br>EccQ<br>AEDk | 52% | 27.5 | 47.84503 | Ref | 1.2  | 0.3  | 1.2  | 0.73  | 0.34  | 0.94 | 0.6   | 387   | 521     | 310   | 645    | 515     | 343   | 546   | 428     | 779   | 2334   | 3 | 0.0024 | 1.018 |
| Alpha-2-HS-glycoprotein<br>OS=Bos taurus<br>GN=AHSG PE=1 SV=2 | sp P12763 FETUA_BOVIN,tri B0JYN6 B0JYN6_BOVIN | aHY<br>DLR                 | 54% | 29.7 | 49.66695 | Ref | 0.55 | 0.34 | 0.86 | 0.036 | 0.51  | 0.73 | 0.088 | 2E+05 | 336000  | 3E+05 | 508000 | 317000  | 4E+05 | 5E+05 | 297000  | 360.2 | 1077.6 | 3 | 0.0086 | 7.985 |
| Alpha-2-HS-glycoprotein<br>OS=Bos taurus<br>GN=AHSG PE=1 SV=2 | sp P12763 FETUA_BOVIN,tri B0JYN6 B0JYN6_BOVIN | aHY<br>DLR                 | 53% | 29.6 | 49.73585 | Ref | 0.43 | 0.39 | 0.73 | 0.23  | 0.5   | 0.66 | 0.14  | 14200 | 18600   | 19700 | 27900  | 21800   | 22900 | 26800 | 18500   | 360.2 | 1077.6 | 3 | 0.0116 | 10.79 |
| Alpha-2-HS-glycoprotein<br>OS=Bos taurus<br>GN=AHSG PE=1 SV=2 | sp P12763 FETUA_BOVIN,tri B0JYN6 B0JYN6_BOVIN | aLG<br>GED<br>VR           | 69% | 32.4 | 49.9174  | Ref | 0.65 | 0.24 | 0.61 | 0.42  | 0.037 | 0.86 | 0.07  | 27300 | 39200   | 32000 | 46100  | 44800   | 29900 | 55400 | 31800   | 560.8 | 1119.6 | 2 | 0.0097 | 8.696 |
| Alpha-2-HS-glycoprotein<br>OS=Bos taurus<br>GN=AHSG PE=1 SV=2 | sp P12763 FETUA_BOVIN,tri B0JYN6 B0JYN6_BOVIN | aLG<br>GED<br>VR           | 69% | 32.3 | 49.91695 | Ref | 0.48 | 0.28 | 0.54 | 0.32  | 0.08  | 0.92 | 0.3   | 3E+06 | 4170000 | 4E+06 | 5E+06  | 5010000 | 4E+06 | 7E+06 | 4450000 | 560.8 | 1119.6 | 2 | 0.0099 | 8.803 |

|                                                                  |                                               |                                                  |     |      |          |     |        |                            |      |      |       |      |       |       |         |                            |        |         |       |       |         |       |        |   |        |       |
|------------------------------------------------------------------|-----------------------------------------------|--------------------------------------------------|-----|------|----------|-----|--------|----------------------------|------|------|-------|------|-------|-------|---------|----------------------------|--------|---------|-------|-------|---------|-------|--------|---|--------|-------|
| Alpha-2-HS-glycoprotein<br>OS=Bos taurus<br>GN=AHSG PE=1<br>SV=2 | sp P12763 FETUA_BOVIN, tr B0JYN6 B0JYN6_BOVIN | aLGED<br>VR                                      | 95% | 66.2 | 50.15787 | Ref | 0.53   | Value Missing (-0.9150124) | 0.49 | 0.86 | 0.33  | 0.98 | 0.023 | 1E+05 | 154000  | Value Missing (-0.9150124) | 181000 | 258000  | 2E+05 | 3E+05 | 131000  | 374.2 | 1119.6 | 3 | 0.0087 | 7.764 |
| Alpha-2-HS-glycoprotein<br>OS=Bos taurus<br>GN=AHSG PE=1<br>SV=2 | sp P12763 FETUA_BOVIN, tr B0JYN6 B0JYN6_BOVIN | aLGED<br>VR                                      | 57% | 30.6 | 50.36601 | Ref | 0.54   | 0.43                       | 0.6  | 0.49 | -0.05 | 0.8  | 0.14  | 3E+06 | 4040000 | 4E+06                      | 5E+06  | 5260000 | 3E+06 | 6E+06 | 3720000 | 560.8 | 1119.6 | 2 | 0.0086 | 7.714 |
| Alpha-2-HS-glycoprotein<br>OS=Bos taurus<br>GN=AHSG PE=1<br>SV=2 | sp P12763 FETUA_BOVIN, tr B0JYN6 B0JYN6_BOVIN | aLGED<br>VR                                      | 89% | 41.2 | 50.21764 | Ref | -0.005 | Value Missing (-1.0064844) | 0.81 | 0.5  | 0.26  | 1.3  | 0.37  | 87600 | 93200   | Value Missing (-1.0064844) | 200000 | 178000  | 1E+05 | 3E+05 | 147000  | 374.2 | 1119.6 | 3 | 0.008  | 7.175 |
| Alpha-2-HS-glycoprotein<br>OS=Bos taurus<br>GN=AHSG PE=1<br>SV=2 | sp P12763 FETUA_BOVIN, tr B0JYN6 B0JYN6_BOVIN | aLGED<br>VR                                      | 92% | 41.9 | 49.98482 | Ref | 0.52   | 0.32                       | 0.53 | 0.54 | 0.11  | 0.67 | 0.3   | 1E+05 | 158000  | 1E+05                      | 194000 | 216000  | 1E+05 | 2E+05 | 166000  | 560.8 | 1119.6 | 2 | 0.0103 | 9.231 |
| Alpha-2-HS-glycoprotein<br>OS=Bos taurus<br>GN=AHSG PE=1<br>SV=2 | sp P12763 FETUA_BOVIN, tr B0JYN6 B0JYN6_BOVIN | aLGED<br>VR                                      | 95% | 53   | 49.97295 | Ref | 0.56   | Value Missing (-1.3799417) | 0.48 | 0.49 | 0.6   | 0.79 | 0.46  | 22300 | 24000   | Value Missing (-1.3799417) | 27700  | 30800   | 28900 | 34600 | 27300   | 374.2 | 1119.6 | 3 | 0.0091 | 8.085 |
| Alpha-2-HS-glycoprotein<br>OS=Bos taurus<br>GN=AHSG PE=1<br>SV=2 | sp P12763 FETUA_BOVIN, tr B0JYN6 B0JYN6_BOVIN | aQF<br>VPLP<br>VSVS<br>VEFA<br>VAA<br>TDcl<br>Ak | 84% | 43.1 | 55.16493 | Ref | -0.073 | 0.58                       | 0.47 | 0.71 | 0.067 | 1.1  | 0.082 | 145   | 149     | 254                        | 264    | 343     | 192   | 400   | 201     | 1040  | 3115.7 | 3 | 0.0135 | 4.323 |

|                                                                  |                                               |                          |     |      |          |     |      |      |      |       |       |      |       |       |        |       |        |        |       |       |        |       |        |   |        |       |
|------------------------------------------------------------------|-----------------------------------------------|--------------------------|-----|------|----------|-----|------|------|------|-------|-------|------|-------|-------|--------|-------|--------|--------|-------|-------|--------|-------|--------|---|--------|-------|
| Alpha-2-HS-glycoprotein<br>OS=Bos taurus<br>GN=AHSG PE=1<br>SV=2 | sp P12763 FETUA_BOVIN, tr B0JYN6 B0JYN6_BOVIN | cDSS<br>PDS<br>AED<br>VR | 95% | 51.7 | 41.04692 | Ref | 0.57 | 0.15 | 0.67 | 0.43  | -0.08 | 0.79 | 0.046 | 398   | 413    | 336   | 539    | 502    | 308   | 588   | 349    | 815.8 | 1629.7 | 2 | 0.0397 | 24.32 |
| Alpha-2-HS-glycoprotein<br>OS=Bos taurus<br>GN=AHSG PE=1<br>SV=2 | sp P12763 FETUA_BOVIN, tr B0JYN6 B0JYN6_BOVIN | cDSS<br>PDS<br>AED<br>VR | 95% | 37.5 | 41.90948 | Ref | 0.73 | -0.1 | 0.5  | 0.073 | -0.07 | 0.87 | 0.26  | 547   | 552    | 337   | 574    | 470    | 370   | 744   | 485    | 815.8 | 1629.7 | 2 | 0.0307 | 18.85 |
| Alpha-2-HS-glycoprotein<br>OS=Bos taurus<br>GN=AHSG PE=1<br>SV=2 | sp P12763 FETUA_BOVIN, tr B0JYN6 B0JYN6_BOVIN | cDSS<br>PDS<br>AED<br>VR | 83% | 29.8 | 43.53416 | Ref | 0.52 | 0.58 | 0.38 | 0.21  | 0.35  | 0.48 | 0.042 | 281   | 252    | 284   | 277    | 272    | 262   | 299   | 219    | 815.8 | 1629.7 | 2 | 0.0102 | 6.277 |
| Alpha-2-HS-glycoprotein<br>OS=Bos taurus<br>GN=AHSG PE=1<br>SV=2 | sp P12763 FETUA_BOVIN, tr B0JYN6 B0JYN6_BOVIN | cDSS<br>PDS<br>AED<br>VR | 95% | 41   | 43.88581 | Ref | 0.72 | 0.25 | 0.54 | 0.058 | 0.17  | 0.63 | 0.36  | 413   | 495    | 388   | 533    | 421    | 396   | 570   | 468    | 815.9 | 1629.7 | 2 | 0.0054 | 3.285 |
| Alpha-2-HS-glycoprotein<br>OS=Bos taurus<br>GN=AHSG PE=1<br>SV=2 | sp P12763 FETUA_BOVIN, tr B0JYN6 B0JYN6_BOVIN | cDSS<br>PDS<br>AED<br>VR | 95% | 48.5 | 44.52553 | Ref | 0.67 | 0.25 | 0.48 | 0.25  | 0.011 | 0.76 | 0.26  | 2140  | 2430   | 1970  | 2610   | 2450   | 1810  | 3170  | 2230   | 815.9 | 1629.7 | 2 | #####  | 0.395 |
| Alpha-2-HS-glycoprotein<br>OS=Bos taurus<br>GN=AHSG PE=1<br>SV=2 | sp P12763 FETUA_BOVIN, tr B0JYN6 B0JYN6_BOVIN | cDSS<br>PDS<br>AED<br>VR | 95% | 45.5 | 43.23314 | Ref | 0.44 | 0.25 | 0.55 | 0.19  | -0.17 | 0.93 | 0.38  | 2E+05 | 180000 | 2E+05 | 237000 | 203000 | 1E+05 | 3E+05 | 209000 | 815.8 | 1629.7 | 2 | 0.0146 | 8.963 |

|                                                                  |                                               |                           |     |      |          |     |      |      |      |      |       |      |      |       |        |       |        |        |       |       |       |       |        |   |        |       |
|------------------------------------------------------------------|-----------------------------------------------|---------------------------|-----|------|----------|-----|------|------|------|------|-------|------|------|-------|--------|-------|--------|--------|-------|-------|-------|-------|--------|---|--------|-------|
| Alpha-2-HS-glycoprotein<br>OS=Bos taurus<br>GN=AHSG PE=1<br>SV=2 | sp P12763 FETUA_BOVIN, tr B0JYN6 B0JYN6_BOVIN | cDSS<br>PDS<br>AED<br>VR  | 95% | 61.3 | 43.35638 | Ref | 0.66 | 0.34 | 0.64 | 0.31 | -0.09 | 0.51 | 0.11 | 1E+05 | 119000 | 1E+05 | 142000 | 125000 | 82600 | 1E+05 | 98000 | 544.2 | 1629.7 | 3 | 0.0126 | 7.71  |
| Alpha-2-HS-glycoprotein<br>OS=Bos taurus<br>GN=AHSG PE=1<br>SV=2 | sp P12763 FETUA_BOVIN, tr B0JYN6 B0JYN6_BOVIN | cDSS<br>PDS<br>AED<br>VR  | 95% | 42.8 | 43.36359 | Ref | 0.59 | 0.34 | 0.66 | 0.26 | -0.01 | 0.62 | 0.13 | 44500 | 45100  | 41000 | 57400  | 48100  | 34700 | 56200 | 39800 | 815.8 | 1629.7 | 2 | 0.0126 | 7.7   |
| Alpha-2-HS-glycoprotein<br>OS=Bos taurus<br>GN=AHSG PE=1<br>SV=2 | sp P12763 FETUA_BOVIN, tr B0JYN6 B0JYN6_BOVIN | cDSS<br>PDS<br>AED<br>VR  | 83% | 30   | 43.44412 | Ref | 0.46 | 0.44 | 0.35 | 0.25 | -0.02 | 0.9  | 0.17 | 14900 | 13800  | 14700 | 15500  | 16000  | 11600 | 22800 | 13700 | 815.8 | 1629.7 | 2 | 0.0124 | 7.626 |
| Alpha-2-HS-glycoprotein<br>OS=Bos taurus<br>GN=AHSG PE=1<br>SV=2 | sp P12763 FETUA_BOVIN, tr B0JYN6 B0JYN6_BOVIN | cDSS<br>PDS<br>AED<br>VRk | 81% | 33.7 | 46.90878 | Ref | 0.31 | 0.55 | 0.47 | 0.5  | 0.21  | 0.69 | 0.41 | 41300 | 52100  | 66900 | 71000  | 80000  | 56800 | 83100 | 67900 | 586.9 | 1757.8 | 3 | 0.0124 | 7.069 |
| Alpha-2-HS-glycoprotein<br>OS=Bos taurus<br>GN=AHSG PE=1<br>SV=2 | sp P12763 FETUA_BOVIN, tr B0JYN6 B0JYN6_BOVIN | cDSS<br>PDS<br>AED<br>VRk | 58% | 27.7 | 47.01516 | Ref | 0.51 | 0.33 | 0.48 | 0.57 | 0.2   | 0.74 | 0.3  | 22200 | 31900  | 30700 | 38200  | 44700  | 30300 | 45800 | 33500 | 586.9 | 1757.8 | 3 | 0.0106 | 6.029 |
| Alpha-2-HS-glycoprotein<br>OS=Bos taurus<br>GN=AHSG PE=1<br>SV=2 | sp P12763 FETUA_BOVIN, tr B0JYN6 B0JYN6_BOVIN | cDSS<br>PDS<br>AED<br>VRk | 95% | 46.8 | 47.05547 | Ref | 0.51 | 0.37 | 0.3  | 0.66 | 0.2   | 0.78 | 0.29 | 4110  | 6010   | 5900  | 6320   | 8930   | 5650  | 8860  | 6230  | 879.9 | 1757.8 | 2 | 0.01   | 5.678 |

|                                                                  |                                               |                                                |     |      |          |     |      |       |       |      |       |      |       |       |        |       |        |        |       |       |        |       |        |   |        |       |
|------------------------------------------------------------------|-----------------------------------------------|------------------------------------------------|-----|------|----------|-----|------|-------|-------|------|-------|------|-------|-------|--------|-------|--------|--------|-------|-------|--------|-------|--------|---|--------|-------|
| Alpha-2-HS-glycoprotein<br>OS=Bos taurus<br>GN=AHSG PE=1<br>SV=2 | sp P12763 FETUA_BOVIN, tr B0JYN6 B0JYN6_BOVIN | cDSS<br>PDS<br>AED<br>VRk                      | 95% | 44.2 | 47.99657 | Ref | 0.51 | 0.58  | 0.04  | 0.71 | 0.17  | 0.77 | 0.25  | 2750  | 3920   | 4460  | 3440   | 6030   | 3630  | 5730  | 3970   | 879.9 | 1757.8 | 2 | 0.0042 | 2.373 |
| Alpha-2-HS-glycoprotein<br>OS=Bos taurus<br>GN=AHSG PE=1<br>SV=2 | sp P12763 FETUA_BOVIN, tr B0JYN6 B0JYN6_BOVIN | cDSS<br>PDS<br>AED<br>VRk                      | 52% | 27.7 | 48.01164 | Ref | 0.14 | 0.74  | 0.056 | 0.61 | 0.17  | 0.62 | 0.38  | 33800 | 27600  | 45100 | 31600  | 51200  | 32900 | 46900 | 39400  | 586.9 | 1757.8 | 3 | 0.0046 | 2.602 |
| Alpha-2-HS-glycoprotein<br>OS=Bos taurus<br>GN=AHSG PE=1<br>SV=2 | sp P12763 FETUA_BOVIN, tr B0JYN6 B0JYN6_BOVIN | cDSS<br>PDS<br>AED<br>VRk                      | 66% | 33   | 51.15301 | Ref | 0.32 | 0.24  | 0.77  | 0.45 | -0.08 | 0.76 | 0.33  | 16000 | 16300  | 16700 | 27200  | 24000  | 14500 | 27200 | 19900  | 1032  | 2062   | 2 | 0.0186 | 9.04  |
| Alpha-2-HS-glycoprotein<br>OS=Bos taurus<br>GN=AHSG PE=1<br>SV=2 | sp P12763 FETUA_BOVIN, tr B0JYN6 B0JYN6_BOVIN | cNLL<br>AEk                                    | 84% | 38.7 | 51.99138 | Ref | 0.47 | 0.15  | 0.48  | 0.38 | -0.07 | 0.98 | 0.32  | 2E+05 | 216000 | 2E+05 | 265000 | 272000 | 2E+05 | 4E+05 | 236000 | 722.9 | 1443.8 | 2 | 0.0165 | 11.39 |
| Alpha-2-HS-glycoprotein<br>OS=Bos taurus<br>GN=AHSG PE=1<br>SV=2 | sp P12763 FETUA_BOVIN, tr B0JYN6 B0JYN6_BOVIN | ePac<br>DDP<br>DTE<br>QAA<br>LAAV<br>DYIN<br>k | 93% | 48.7 | 53.65533 | Ref | 0.54 | 0.33  | 0.63  | 0.67 | 0.18  | 0.49 | 0.11  | 1670  | 2110   | 1980  | 2730   | 3090   | 1930  | 2480  | 1910   | 1002  | 3002.4 | 3 | 0.0234 | 7.802 |
| Alpha-2-HS-glycoprotein<br>OS=Bos taurus<br>GN=AHSG PE=1<br>SV=2 | sp P12763 FETUA_BOVIN, tr B0JYN6 B0JYN6_BOVIN | ePac<br>DDP<br>DTE<br>QAA<br>LAAV<br>DYIN<br>k | 95% | 64   | 53.84248 | Ref | 0.33 | 6E-04 | 0.65  | 0.48 | 0.14  | 0.43 | 0.017 | 2030  | 1240   | 1070  | 1890   | 1850   | 1280  | 1630  | 1210   | 1002  | 3002.4 | 3 | 0.0172 | 5.724 |



|                                                                  |                                               |                                           |     |      |          |     |      |       |      |       |       |      |      |       |         |       |        |         |       |       |         |       |        |   |        |       |
|------------------------------------------------------------------|-----------------------------------------------|-------------------------------------------|-----|------|----------|-----|------|-------|------|-------|-------|------|------|-------|---------|-------|--------|---------|-------|-------|---------|-------|--------|---|--------|-------|
| Alpha-2-HS-glycoprotein<br>OS=Bos taurus<br>GN=AHSG PE=1<br>SV=2 | sp P12763 FETUA_BOVIN, tr B0JYN6 B0JYN6_BOVIN | gSVI<br>Qk                                | 56% | 31.8 | 51.76529 | Ref | 0.58 | 0.34  | 0.52 | 0.47  | 0.049 | 0.75 | 0.19 | 9E+05 | 1060000 | 1E+06 | 1E+06  | 1330000 | 9E+05 | 1E+06 | 989000  | 620.4 | 1238.8 | 2 | 0.013  | 10.52 |
| Alpha-2-HS-glycoprotein<br>OS=Bos taurus<br>GN=AHSG PE=1<br>SV=2 | sp P12763 FETUA_BOVIN, tr B0JYN6 B0JYN6_BOVIN | gSVI<br>Qk                                | 57% | 32   | 51.77254 | Ref | 0.5  | 0.18  | 0.57 | 0.39  | 0.19  | 0.81 | 0.33 | 95600 | 120000  | 1E+05 | 154000 | 150000  | 1E+05 | 2E+05 | 130000  | 620.4 | 1238.8 | 2 | 0.0161 | 12.97 |
| Alpha-2-HS-glycoprotein<br>OS=Bos taurus<br>GN=AHSG PE=1<br>SV=2 | sp P12763 FETUA_BOVIN, tr B0JYN6 B0JYN6_BOVIN | gSVI<br>Qk                                | 57% | 32.1 | 51.76529 | Ref | 0.51 | 0.32  | 0.49 | 0.46  | 0.074 | 0.83 | 0.3  | 2E+06 | 2410000 | 2E+06 | 3E+06  | 3130000 | 2E+06 | 4E+06 | 2540000 | 620.4 | 1238.8 | 2 | 0.0129 | 10.41 |
| Alpha-2-HS-glycoprotein<br>OS=Bos taurus<br>GN=AHSG PE=1<br>SV=2 | sp P12763 FETUA_BOVIN, tr B0JYN6 B0JYN6_BOVIN | gSVI<br>Qk                                | 57% | 31.4 | 51.17619 | Ref | 0.56 | 0.31  | 0.45 | 0.43  | 0.16  | 0.67 | 0.39 | 38700 | 47700   | 43600 | 54000  | 58700   | 42500 | 63000 | 51600   | 620.4 | 1238.8 | 2 | 0.0024 | 1.956 |
| Alpha-2-HS-glycoprotein<br>OS=Bos taurus<br>GN=AHSG PE=1<br>SV=2 | sp P12763 FETUA_BOVIN, tr B0JYN6 B0JYN6_BOVIN | gSVI<br>Qk                                | 53% | 30.7 | 51.17619 | Ref | 0.36 | 0.39  | 0.49 | 0.45  | 0.18  | 0.74 | 0.32 | 15700 | 16600   | 18300 | 22000  | 23700   | 17200 | 26400 | 19600   | 620.4 | 1238.8 | 2 | 0.0036 | 2.941 |
| Alpha-2-HS-glycoprotein<br>OS=Bos taurus<br>GN=AHSG PE=1<br>SV=2 | sp P12763 FETUA_BOVIN, tr B0JYN6 B0JYN6_BOVIN | hTFS<br>GVA<br>SVES<br>SSGE<br>AFH<br>VGK | 95% | 62.6 | 55.1526  | Ref | 0.83 | -0.08 | 0.5  | 0.019 | -0.02 | 1.1  | 0.29 | 1680  | 2620    | 1520  | 2540   | 2010    | 1710  | 3830  | 2190    | 910.1 | 2727.4 | 3 | 0.0231 | 8.472 |

|                                                                  |                                               |                                           |     |      |          |     |      |      |      |      |       |      |      |       |       |       |       |       |       |       |       |       |        |   |        |       |
|------------------------------------------------------------------|-----------------------------------------------|-------------------------------------------|-----|------|----------|-----|------|------|------|------|-------|------|------|-------|-------|-------|-------|-------|-------|-------|-------|-------|--------|---|--------|-------|
| Alpha-2-HS-glycoprotein<br>OS=Bos taurus<br>GN=AHSG PE=1<br>SV=2 | sp P12763 FETUA_BOVIN,tri B0JYN6 B0JYN6_BOVIN | hTFS<br>GVA<br>SVES<br>SSGE<br>AFH<br>VGk | 95% | 61.1 | 55.18517 | Ref | 0.68 | 0.17 | 0.58 | 0.28 | 0.24  | 0.78 | 0.4  | 4280  | 7240  | 5520  | 8190  | 7340  | 6230  | 9470  | 7210  | 682.9 | 2727.4 | 4 | 0.0216 | 7.921 |
| Alpha-2-HS-glycoprotein<br>OS=Bos taurus<br>GN=AHSG PE=1<br>SV=2 | sp P12763 FETUA_BOVIN,tri B0JYN6 B0JYN6_BOVIN | hTFS<br>GVA<br>SVES<br>SSGE<br>AFH<br>VGk | 95% | 65   | 55.18517 | Ref | 0.62 | 0.2  | 0.58 | 0.29 | 0.3   | 0.54 | 0.36 | 7690  | 9260  | 7520  | 11000 | 9940  | 8690  | 10700 | 9420  | 682.9 | 2727.4 | 4 | 0.0216 | 7.921 |
| Alpha-2-HS-glycoprotein<br>OS=Bos taurus<br>GN=AHSG PE=1<br>SV=2 | sp P12763 FETUA_BOVIN,tri B0JYN6 B0JYN6_BOVIN | hTFS<br>GVA<br>SVES<br>SSGE<br>AFH<br>VGk | 95% | 61.6 | 55.18056 | Ref | 0.58 | -0.1 | 0.51 | 0.12 | 0.2   | 1.2  | 0.3  | 4120  | 6480  | 4400  | 7560  | 6330  | 5830  | 12400 | 6500  | 910.1 | 2727.4 | 3 | 0.0189 | 6.933 |
| Alpha-2-HS-glycoprotein<br>OS=Bos taurus<br>GN=AHSG PE=1<br>SV=2 | sp P12763 FETUA_BOVIN,tri B0JYN6 B0JYN6_BOVIN | hTFS<br>GVA<br>SVES<br>SSGE<br>AFH<br>VGk | 81% | 36.3 | 55.22731 | Ref | 0.48 | 0.22 | 0.44 | 0.49 | -0    | 0.7  | 0.54 | 11300 | 12800 | 11600 | 15100 | 17300 | 10700 | 18200 | 16100 | 546.5 | 2727.4 | 5 | 0.0168 | 6.164 |
| Alpha-2-HS-glycoprotein<br>OS=Bos taurus<br>GN=AHSG PE=1<br>SV=2 | sp P12763 FETUA_BOVIN,tri B0JYN6 B0JYN6_BOVIN | hTFS<br>GVA<br>SVES<br>SSGE<br>AFH<br>VGk | 84% | 37.6 | 55.18842 | Ref | 0.26 | 0.03 | 0.43 | 0.48 | 0.36  | 0.74 | 0.39 | 3140  | 2630  | 2430  | 3600  | 4120  | 3290  | 4480  | 3510  | 546.5 | 2727.4 | 5 | 0.0205 | 7.501 |
| Alpha-2-HS-glycoprotein<br>OS=Bos taurus<br>GN=AHSG PE=1<br>SV=2 | sp P12763 FETUA_BOVIN,tri B0JYN6 B0JYN6_BOVIN | hTFS<br>GVA<br>SVES<br>SSGE<br>AFH<br>VGk | 95% | 55.1 | 55.21788 | Ref | 0.64 | 0.24 | 0.61 | 0.34 | 0.083 | 0.74 | 0.28 | 2840  | 3870  | 3180  | 4610  | 4220  | 3080  | 5070  | 3670  | 682.9 | 2727.4 | 4 | 0.0177 | 6.484 |

|                                                                  |                                               |                                           |     |      |          |     |      |       |      |      |       |      |      |       |        |       |        |        |       |       |        |       |        |   |        |       |
|------------------------------------------------------------------|-----------------------------------------------|-------------------------------------------|-----|------|----------|-----|------|-------|------|------|-------|------|------|-------|--------|-------|--------|--------|-------|-------|--------|-------|--------|---|--------|-------|
| Alpha-2-HS-glycoprotein<br>OS=Bos taurus<br>GN=AHSG PE=1<br>SV=2 | sp P12763 FETUA_BOVIN,tri B0JYN6 B0JYN6_BOVIN | hTFS<br>GVA<br>SVES<br>SSGE<br>AFH<br>VGk | 95% | 81.1 | 55.26102 | Ref | 0.79 | 0.052 | 0.52 | 0.26 | 0.12  | 0.87 | 0.27 | 883   | 1400   | 913   | 1420   | 1310   | 1040  | 1810  | 1190   | 910.1 | 2727.4 | 3 | 0.0143 | 5.25  |
| Alpha-2-HS-glycoprotein<br>OS=Bos taurus<br>GN=AHSG PE=1<br>SV=2 | sp P12763 FETUA_BOVIN,tri B0JYN6 B0JYN6_BOVIN | hTLN<br>QIDS<br>Vk                        | 90% | 42.9 | 52.56662 | Ref | 0.43 | 0.28  | 0.63 | 0.48 | 0.07  | 0.79 | 0.24 | 20500 | 23700  | 23300 | 33300  | 33000  | 21700 | 37300 | 25200  | 882   | 1762   | 2 | 0.0151 | 8.577 |
| Alpha-2-HS-glycoprotein<br>OS=Bos taurus<br>GN=AHSG PE=1<br>SV=2 | sp P12763 FETUA_BOVIN,tri B0JYN6 B0JYN6_BOVIN | hTLN<br>QIDS<br>Vk                        | 81% | 39.7 | 53.03248 | Ref | 0.39 | 0.39  | 0.57 | 0.42 | 0.1   | 0.83 | 0.31 | 2E+05 | 204000 | 2E+05 | 282000 | 280000 | 2E+05 | 3E+05 | 235000 | 588.3 | 1762   | 3 | 0.0274 | 15.55 |
| Alpha-2-HS-glycoprotein<br>OS=Bos taurus<br>GN=AHSG PE=1<br>SV=2 | sp P12763 FETUA_BOVIN,tri B0JYN6 B0JYN6_BOVIN | hTLN<br>QIDS<br>Vk                        | 95% | 50.9 | 52.57093 | Ref | 0.5  | 0.19  | 0.54 | 0.52 | 0.15  | 0.76 | 0.22 | 62800 | 73900  | 64600 | 92600  | 101000 | 67900 | 1E+05 | 73700  | 588.3 | 1762   | 3 | 0.0153 | 8.688 |
| Alpha-2-HS-glycoprotein<br>OS=Bos taurus<br>GN=AHSG PE=1<br>SV=2 | sp P12763 FETUA_BOVIN,tri B0JYN6 B0JYN6_BOVIN | hTLN<br>QIDS<br>Vk                        | 94% | 45.9 | 52.50462 | Ref | 0.59 | 0.24  | 0.55 | 0.52 | 0.088 | 0.75 | 0.19 | 8260  | 11000  | 9320  | 13000  | 14000  | 9060  | 15000 | 10100  | 882   | 1762   | 2 | 0.0121 | 6.841 |
| Alpha-2-HS-glycoprotein<br>OS=Bos taurus<br>GN=AHSG PE=1<br>SV=2 | sp P12763 FETUA_BOVIN,tri B0JYN6 B0JYN6_BOVIN | hTLN<br>QIDS<br>Vk                        | 95% | 48.3 | 52.7392  | Ref | 0.36 | 0.27  | 0.53 | 0.51 | 0.13  | 0.77 | 0.32 | 2990  | 3120   | 3180  | 4270   | 4640   | 3120  | 5090  | 3680   | 882   | 1762   | 2 | 0.0199 | 11.28 |

|                                                                  |                                               |                    |     |      |          |     |      |      |      |       |       |      |      |       |        |       |        |        |       |       |        |       |      |   |        |       |
|------------------------------------------------------------------|-----------------------------------------------|--------------------|-----|------|----------|-----|------|------|------|-------|-------|------|------|-------|--------|-------|--------|--------|-------|-------|--------|-------|------|---|--------|-------|
| Alpha-2-HS-glycoprotein<br>OS=Bos taurus<br>GN=AHSG PE=1<br>SV=2 | sp P12763 FETUA_BOVIN, tr B0JYN6 B0JYN6_BOVIN | hTLN<br>QIDS<br>Vk | 65% | 34.8 | 52.7392  | Ref | 0.47 | 0.85 | 0.11 | 0.054 | 0.12  | 0.2  | 0.89 | 9880  | 11100  | 15600 | 10500  | 11200  | 10200 | 11300 | 18100  | 588.3 | 1762 | 3 | 0.0199 | 11.27 |
| Alpha-2-HS-glycoprotein<br>OS=Bos taurus<br>GN=AHSG PE=1<br>SV=2 | sp P12763 FETUA_BOVIN, tr B0JYN6 B0JYN6_BOVIN | hTLN<br>QIDS<br>Vk | 88% | 43.2 | 52.63096 | Ref | 0.41 | 0.27 | 0.59 | 0.43  | 0.11  | 0.95 | 0.21 | 4E+05 | 555000 | 5E+05 | 763000 | 755000 | 5E+05 | 1E+06 | 586000 | 588.3 | 1762 | 3 | 0.0162 | 9.199 |
| Alpha-2-HS-glycoprotein<br>OS=Bos taurus<br>GN=AHSG PE=1<br>SV=2 | sp P12763 FETUA_BOVIN, tr B0JYN6 B0JYN6_BOVIN | hTLN<br>QIDS<br>Vk | 68% | 35.3 | 52.57093 | Ref | 0.69 | 0.2  | 0.76 | 0.33  | -0.04 | 0.67 | 0.21 | 37700 | 50400  | 38800 | 64300  | 52600  | 35700 | 61000 | 43800  | 588.3 | 1762 | 3 | 0.0153 | 8.688 |
| Alpha-2-HS-glycoprotein<br>OS=Bos taurus<br>GN=AHSG PE=1<br>SV=2 | sp P12763 FETUA_BOVIN, tr B0JYN6 B0JYN6_BOVIN | hTLN<br>QIDS<br>Vk | 93% | 44.7 | 52.51962 | Ref | 0.6  | 0.13 | 0.49 | 0.56  | 0.025 | 0.86 | 0.34 | 15300 | 23000  | 18100 | 25900  | 30000  | 18100 | 33800 | 23300  | 882   | 1762 | 2 | 0.0141 | 8.021 |
| Alpha-2-HS-glycoprotein<br>OS=Bos taurus<br>GN=AHSG PE=1<br>SV=2 | sp P12763 FETUA_BOVIN, tr B0JYN6 B0JYN6_BOVIN | hTLN<br>QIDS<br>Vk | 95% | 68.7 | 52.43294 | Ref | 0.39 | 0.33 | 0.66 | 0.43  | -0.02 | 0.82 | 0.21 | 3500  | 3720   | 3850  | 5440   | 5110   | 3280  | 6110  | 3990   | 882   | 1762 | 2 | 0.0104 | 5.877 |
| Alpha-2-HS-glycoprotein<br>OS=Bos taurus<br>GN=AHSG PE=1<br>SV=2 | sp P12763 FETUA_BOVIN, tr B0JYN6 B0JYN6_BOVIN | hTLN<br>QIDS<br>Vk | 82% | 38.7 | 52.7392  | Ref | 0.4  | 0.36 | 0.59 | 0.51  | 0.05  | 0.83 | 0.18 | 11300 | 13100  | 13800 | 18100  | 18900  | 12000 | 21500 | 13600  | 882   | 1762 | 2 | 0.0199 | 11.28 |

|                                                                  |                                               |                    |     |      |          |     |      |       |      |      |       |      |       |       |        |       |       |         |       |       |        |       |      |   |        |       |
|------------------------------------------------------------------|-----------------------------------------------|--------------------|-----|------|----------|-----|------|-------|------|------|-------|------|-------|-------|--------|-------|-------|---------|-------|-------|--------|-------|------|---|--------|-------|
| Alpha-2-HS-glycoprotein<br>OS=Bos taurus<br>GN=AHSG PE=1<br>SV=2 | sp P12763 FETUA_BOVIN, tr B0JYN6 B0JYN6_BOVIN | hTLN<br>QIDS<br>Vk | 91% | 45.4 | 52.51794 | Ref | 0.32 | 0.43  | 0.68 | 0.37 | -0.01 | 0.95 | 0.095 | 8E+05 | 887000 | 1E+06 | 1E+06 | 1240000 | 8E+05 | 2E+06 | 924000 | 588.3 | 1762 | 3 | 0.0146 | 8.263 |
| Alpha-2-HS-glycoprotein<br>OS=Bos taurus<br>GN=AHSG PE=1<br>SV=2 | sp P12763 FETUA_BOVIN, tr B0JYN6 B0JYN6_BOVIN | hTLN<br>QIDS<br>Vk | 93% | 45.7 | 52.51295 | Ref | 0.37 | 0.084 | 0.59 | 0.48 | 0.12  | 0.85 | 0.45  | 7430  | 8560   | 7650  | 12200 | 12400   | 8460  | 14600 | 11100  | 882   | 1762 | 2 | 0.0123 | 6.977 |
| Alpha-2-HS-glycoprotein<br>OS=Bos taurus<br>GN=AHSG PE=1<br>SV=2 | sp P12763 FETUA_BOVIN, tr B0JYN6 B0JYN6_BOVIN | hTLN<br>QIDS<br>Vk | 95% | 51.4 | 52.4638  | Ref | 0.48 | 0.35  | 0.58 | 0.56 | 0.17  | 0.64 | 0.18  | 4960  | 5830   | 5790  | 7630  | 8280    | 5520  | 7980  | 5770   | 882   | 1762 | 2 | 0.0134 | 7.601 |
| Alpha-2-HS-glycoprotein<br>OS=Bos taurus<br>GN=AHSG PE=1<br>SV=2 | sp P12763 FETUA_BOVIN, tr B0JYN6 B0JYN6_BOVIN | hTLN<br>QIDS<br>Vk | 95% | 51   | 52.41053 | Ref | 0.39 | 0.37  | 0.6  | 0.43 | 0.13  | 0.74 | 0.26  | 41500 | 45300  | 48500 | 63500 | 62400   | 44200 | 70300 | 50100  | 588.3 | 1762 | 3 | 0.0098 | 5.574 |
| Alpha-2-HS-glycoprotein<br>OS=Bos taurus<br>GN=AHSG PE=1<br>SV=2 | sp P12763 FETUA_BOVIN, tr B0JYN6 B0JYN6_BOVIN | hTLN<br>QIDS<br>Vk | 81% | 38.9 | 52.43294 | Ref | 0.56 | 0.42  | 0.37 | 0.4  | 0.23  | 0.58 | 0.3   | 5490  | 6170   | 6080  | 6580  | 7400    | 5740  | 7670  | 6240   | 588.3 | 1762 | 3 | 0.0104 | 5.88  |
| Alpha-2-HS-glycoprotein<br>OS=Bos taurus<br>GN=AHSG PE=1<br>SV=2 | sp P12763 FETUA_BOVIN, tr B0JYN6 B0JYN6_BOVIN | hTLN<br>QIDS<br>Vk | 88% | 42.5 | 52.28174 | Ref | 0.45 | 0.31  | 0.5  | 0.38 | 0.43  | 0.46 | 0.31  | 2620  | 2640   | 2600  | 3310  | 3360    | 3040  | 3230  | 2910   | 588.3 | 1762 | 3 | 0.006  | 3.379 |

|                                                                  |                                               |                    |     |      |          |     |      |      |      |      |       |      |       |       |        |       |        |        |       |       |        |       |      |   |        |       |
|------------------------------------------------------------------|-----------------------------------------------|--------------------|-----|------|----------|-----|------|------|------|------|-------|------|-------|-------|--------|-------|--------|--------|-------|-------|--------|-------|------|---|--------|-------|
| Alpha-2-HS-glycoprotein<br>OS=Bos taurus<br>GN=AHSG PE=1<br>SV=2 | sp P12763 FETUA_BOVIN,tri B0JYN6 B0JYN6_BOVIN | hTLn<br>QIDS<br>Vk | 94% | 50.9 | 52.88073 | Ref | 0.49 | 0.21 | 0.6  | 0.56 | 0.16  | 0.81 | 0.014 | 73800 | 87400  | 78000 | 114000 | 123000 | 81100 | 1E+05 | 76100  | 588.7 | 1763 | 3 | 0.0146 | 8.263 |
| Alpha-2-HS-glycoprotein<br>OS=Bos taurus<br>GN=AHSG PE=1<br>SV=2 | sp P12763 FETUA_BOVIN,tri B0JYN6 B0JYN6_BOVIN | hTLn<br>QIDS<br>Vk | 80% | 38.4 | 52.88527 | Ref | 0.45 | 0.39 | 0.46 | 0.53 | 0.11  | 0.77 | 0.22  | 10100 | 11800  | 12300 | 14500  | 16800  | 10900 | 18000 | 12300  | 882.5 | 1763 | 2 | 0.0134 | 7.602 |
| Alpha-2-HS-glycoprotein<br>OS=Bos taurus<br>GN=AHSG PE=1<br>SV=2 | sp P12763 FETUA_BOVIN,tri B0JYN6 B0JYN6_BOVIN | hTLn<br>QIDS<br>Vk | 95% | 53.9 | 52.99928 | Ref | 0.48 | 0.65 | 0.23 | 0.34 | 0.094 | 0.56 | 0.79  | 1910  | 2900   | 3540  | 2970   | 3540   | 2600  | 3760  | 4370   | 882.5 | 1763 | 2 | 0.0206 | 11.68 |
| Alpha-2-HS-glycoprotein<br>OS=Bos taurus<br>GN=AHSG PE=1<br>SV=2 | sp P12763 FETUA_BOVIN,tri B0JYN6 B0JYN6_BOVIN | hTLn<br>QIDS<br>Vk | 91% | 46.5 | 53.0113  | Ref | 0.38 | 0.7  | 0.24 | 0.31 | 0.007 | 0.66 | 0.64  | 29300 | 33700  | 45600 | 37100  | 43000  | 30400 | 49800 | 48700  | 588.7 | 1763 | 3 | 0.0199 | 11.27 |
| Alpha-2-HS-glycoprotein<br>OS=Bos taurus<br>GN=AHSG PE=1<br>SV=2 | sp P12763 FETUA_BOVIN,tri B0JYN6 B0JYN6_BOVIN | hTLn<br>QIDS<br>Vk | 89% | 44.4 | 52.95429 | Ref | 0.38 | 0.35 | 0.42 | 0.58 | 0.084 | 0.85 | 0.33  | 88000 | 105000 | 1E+05 | 132000 | 162000 | 1E+05 | 2E+05 | 124000 | 588.7 | 1763 | 3 | 0.0171 | 9.709 |
| Alpha-2-HS-glycoprotein<br>OS=Bos taurus<br>GN=AHSG PE=1<br>SV=2 | sp P12763 FETUA_BOVIN,tri B0JYN6 B0JYN6_BOVIN | hTLn<br>QIDS<br>Vk | 94% | 50.9 | 52.94773 | Ref | 0.46 | 0.41 | 0.48 | 0.32 | 0.2   | 0.77 | 0.46  | 19200 | 25600  | 26800 | 31500  | 31300  | 25000 | 38700 | 31100  | 588.7 | 1763 | 3 | 0.0166 | 9.403 |

|                                                                  |                                               |                    |     |      |          |     |      |      |      |      |       |      |      |       |       |       |        |        |       |       |        |       |      |   |        |       |
|------------------------------------------------------------------|-----------------------------------------------|--------------------|-----|------|----------|-----|------|------|------|------|-------|------|------|-------|-------|-------|--------|--------|-------|-------|--------|-------|------|---|--------|-------|
| Alpha-2-HS-glycoprotein<br>OS=Bos taurus<br>GN=AHSG PE=1<br>SV=2 | sp P12763 FETUA_BOVIN, tr B0JYN6 B0JYN6_BOVIN | hTLn<br>QIDS<br>Vk | 88% | 43.4 | 52.94636 | Ref | 0.29 | 0.35 | 0.5  | 0.46 | 0.17  | 0.76 | 0.42 | 56500 | 58500 | 66000 | 82100  | 88500  | 63100 | 99200 | 77400  | 588.7 | 1763 | 3 | 0.0162 | 9.199 |
| Alpha-2-HS-glycoprotein<br>OS=Bos taurus<br>GN=AHSG PE=1<br>SV=2 | sp P12763 FETUA_BOVIN, tr B0JYN6 B0JYN6_BOVIN | hTLn<br>QIDS<br>Vk | 92% | 47.2 | 52.93714 | Ref | 0.39 | 0.37 | 0.49 | 0.42 | 0.32  | 0.66 | 0.36 | 26500 | 30000 | 32200 | 39300  | 41300  | 33600 | 44400 | 35900  | 588.7 | 1763 | 3 | 0.016  | 9.096 |
| Alpha-2-HS-glycoprotein<br>OS=Bos taurus<br>GN=AHSG PE=1<br>SV=2 | sp P12763 FETUA_BOVIN, tr B0JYN6 B0JYN6_BOVIN | hTLn<br>QIDS<br>Vk | 95% | 48   | 52.88059 | Ref | 0.45 | 0.35 | 0.55 | 0.52 | 0.089 | 0.76 | 0.34 | 9760  | 12800 | 13000 | 16800  | 18000  | 11700 | 19400 | 14400  | 882.5 | 1763 | 2 | 0.0145 | 8.226 |
| Alpha-2-HS-glycoprotein<br>OS=Bos taurus<br>GN=AHSG PE=1<br>SV=2 | sp P12763 FETUA_BOVIN, tr B0JYN6 B0JYN6_BOVIN | hTLn<br>QIDS<br>Vk | 79% | 36.7 | 52.87598 | Ref | 0.47 | 0.43 | 0.39 | 0.46 | -0.07 | 0.7  | 0.43 | 92000 | 98400 | 1E+05 | 114000 | 132000 | 79700 | 1E+05 | 117000 | 441.8 | 1763 | 4 | 0.0144 | 8.164 |
| Alpha-2-HS-glycoprotein<br>OS=Bos taurus<br>GN=AHSG PE=1<br>SV=2 | sp P12763 FETUA_BOVIN, tr B0JYN6 B0JYN6_BOVIN | hTLn<br>QIDS<br>Vk | 94% | 46.3 | 52.89317 | Ref | 0.43 | 0.38 | 0.6  | 0.64 | 0.18  | 0.8  | 0.15 | 7670  | 11800 | 12400 | 16300  | 18300  | 11700 | 18700 | 11800  | 882.5 | 1763 | 2 | 0.0128 | 7.251 |
| Alpha-2-HS-glycoprotein<br>OS=Bos taurus<br>GN=AHSG PE=1<br>SV=2 | sp P12763 FETUA_BOVIN, tr B0JYN6 B0JYN6_BOVIN | hTLn<br>QIDS<br>Vk | 95% | 49.3 | 52.88935 | Ref | 0.41 | 0.27 | 0.47 | 0.57 | 0.13  | 0.82 | 0.34 | 6490  | 7900  | 7770  | 10100  | 11900  | 7640  | 12800 | 9170   | 882.5 | 1763 | 2 | 0.0122 | 6.911 |

|                                                                  |                                               |                            |     |      |          |     |      |       |      |      |       |      |      |       |        |       |        |        |       |       |        |       |        |   |        |       |
|------------------------------------------------------------------|-----------------------------------------------|----------------------------|-----|------|----------|-----|------|-------|------|------|-------|------|------|-------|--------|-------|--------|--------|-------|-------|--------|-------|--------|---|--------|-------|
| Alpha-2-HS-glycoprotein<br>OS=Bos taurus<br>GN=AHSG PE=1<br>SV=2 | sp P12763 FETUA_BOVIN,tri B0JYN6 B0JYN6_BOVIN | hTLN<br>QIDS<br>VKV<br>WPR | 94% | 51.6 | 53.69789 | Ref | 0.7  | 0.42  | 0.32 | 0.16 | 0.24  | 0.55 | 0.45 | 4340  | 5460   | 4870  | 5110   | 5020   | 4650  | 6000  | 5570   | 666.4 | 1996.1 | 3 | 0.0206 | 10.32 |
| Alpha-2-HS-glycoprotein<br>OS=Bos taurus<br>GN=AHSG PE=1<br>SV=2 | sp P12763 FETUA_BOVIN,tri B0JYN6 B0JYN6_BOVIN | QDG<br>QFS<br>VLFT<br>k    | 81% | 38.3 | 52.48976 | Ref | 0.58 | 0.48  | 0.32 | 0.42 | 0.18  | 0.66 | 0.18 | 3990  | 4510   | 4550  | 4590   | 5420   | 4010  | 5810  | 4150   | 787.4 | 1572.8 | 2 | 0.0057 | 3.625 |
| Alpha-2-HS-glycoprotein<br>OS=Bos taurus<br>GN=AHSG PE=1<br>SV=2 | sp P12763 FETUA_BOVIN,tri B0JYN6 B0JYN6_BOVIN | qDG<br>QFS<br>VLFT<br>k    | 82% | 38.2 | 52.07257 | Ref | 0.49 | 0.33  | 0.33 | 0.5  | 0.24  | 0.8  | 0.3  | 443   | 543    | 529   | 595    | 737    | 536   | 824   | 579    | 778.9 | 1555.8 | 2 | 0.0112 | 7.203 |
| Alpha-2-HS-glycoprotein<br>OS=Bos taurus<br>GN=AHSG PE=1<br>SV=2 | sp P12763 FETUA_BOVIN,tri B0JYN6 B0JYN6_BOVIN | qDG<br>QFS<br>VLFT<br>k    | 93% | 49.4 | 53.66753 | Ref | 0.4  | 0.051 | 0.48 | 0.4  | -0.02 | 0.86 | 0.76 | 4E+05 | 476000 | 4E+05 | 611000 | 640000 | 4E+05 | 8E+05 | 742000 | 626.7 | 1877   | 3 | 0.0261 | 13.87 |
| Alpha-2-HS-glycoprotein<br>OS=Bos taurus<br>GN=AHSG PE=1<br>SV=2 | sp P12763 FETUA_BOVIN,tri B0JYN6 B0JYN6_BOVIN | qDG<br>QFS<br>VLFT<br>k    | 86% | 42.5 | 53.60344 | Ref | 0.55 | 0.23  | 0.47 | 0.31 | 0.15  | 0.54 | 0.66 | 10400 | 12700  | 11000 | 14600  | 14400  | 11300 | 15400 | 16600  | 626.7 | 1877   | 3 | 0.0213 | 11.33 |
| Alpha-2-HS-glycoprotein<br>OS=Bos taurus<br>GN=AHSG PE=1<br>SV=2 | sp P12763 FETUA_BOVIN,tri B0JYN6 B0JYN6_BOVIN | qDG<br>QFS<br>VLFT<br>k    | 95% | 49.2 | 53.59869 | Ref | 0.49 | 0.24  | 0.52 | 0.47 | 0.11  | 0.82 | 0.32 | 20000 | 25400  | 23200 | 31400  | 33600  | 22800 | 39000 | 27300  | 939.5 | 1877   | 2 | 0.0207 | 11.04 |



|                                                                  |                                               |                         |     |      |          |     |      |       |      |      |       |      |      |       |       |       |       |       |       |       |       |       |      |   |        |       |
|------------------------------------------------------------------|-----------------------------------------------|-------------------------|-----|------|----------|-----|------|-------|------|------|-------|------|------|-------|-------|-------|-------|-------|-------|-------|-------|-------|------|---|--------|-------|
| Alpha-2-HS-glycoprotein<br>OS=Bos taurus<br>GN=AHSG PE=1<br>SV=2 | sp P12763 FETUA_BOVIN, tr B0JYN6 B0JYN6_BOVIN | qDG<br>QFS<br>VLFT<br>k | 90% | 45.3 | 53.60576 | Ref | 0.17 | 0.69  | 0.34 | 0.07 | -0.02 | 0.51 | 1.1  | 8340  | 10300 | 15900 | 14100 | 12800 | 10500 | 15900 | 24400 | 626.7 | 1877 | 3 | 0.0206 | 10.95 |
| Alpha-2-HS-glycoprotein<br>OS=Bos taurus<br>GN=AHSG PE=1<br>SV=2 | sp P12763 FETUA_BOVIN, tr B0JYN6 B0JYN6_BOVIN | qDG<br>QFS<br>VLFT<br>k | 95% | 50.6 | 53.59485 | Ref | 0.43 | 0.19  | 0.44 | 0.48 | 0.078 | 0.88 | 0.43 | 61200 | 71500 | 65600 | 87900 | 99600 | 65800 | 1E+05 | 86800 | 939.5 | 1877 | 2 | 0.02   | 10.64 |
| Alpha-2-HS-glycoprotein<br>OS=Bos taurus<br>GN=AHSG PE=1<br>SV=2 | sp P12763 FETUA_BOVIN, tr B0JYN6 B0JYN6_BOVIN | qDG<br>QFS<br>VLFT<br>k | 57% | 33.8 | 53.57746 | Ref | 0.49 | 0.26  | 0.59 | 0.5  | 0.12  | 0.75 | 0.26 | 38500 | 48300 | 44500 | 62800 | 65100 | 43600 | 70500 | 49900 | 939.5 | 1877 | 2 | 0.0179 | 9.546 |
| Alpha-2-HS-glycoprotein<br>OS=Bos taurus<br>GN=AHSG PE=1<br>SV=2 | sp P12763 FETUA_BOVIN, tr B0JYN6 B0JYN6_BOVIN | qDG<br>QFS<br>VLFT<br>k | 95% | 62.5 | 53.5705  | Ref | 0.63 | 0.094 | 0.61 | 0.44 | 0.071 | 0.8  | 0.1  | 63300 | 77300 | 57800 | 92500 | 90800 | 61400 | 1E+05 | 65100 | 939.5 | 1877 | 2 | 0.0173 | 9.216 |
| Alpha-2-HS-glycoprotein<br>OS=Bos taurus<br>GN=AHSG PE=1<br>SV=2 | sp P12763 FETUA_BOVIN, tr B0JYN6 B0JYN6_BOVIN | qDG<br>QFS<br>VLFT<br>k | 95% | 57.6 | 53.50783 | Ref | 0.35 | 0.2   | 0.68 | 0.44 | -0.02 | 0.78 | 0.4  | 51000 | 52500 | 51200 | 80200 | 75200 | 47600 | 86500 | 66100 | 626.7 | 1877 | 3 | 0.016  | 8.505 |
| Alpha-2-HS-glycoprotein<br>OS=Bos taurus<br>GN=AHSG PE=1<br>SV=2 | sp P12763 FETUA_BOVIN, tr B0JYN6 B0JYN6_BOVIN | qDG<br>QFS<br>VLFT<br>k | 83% | 38.9 | 53.50248 | Ref | 0.37 | -0.07 | 0.35 | 0.3  | 0.25  | 0.79 | 0.74 | 13200 | 13200 | 10500 | 15800 | 16800 | 14200 | 21500 | 20600 | 470.3 | 1877 | 4 | 0.0155 | 8.264 |

|                                                                  |                                               |                         |     |      |          |     |      |       |      |      |       |      |      |       |        |       |        |        |       |       |        |       |      |   |        |       |
|------------------------------------------------------------------|-----------------------------------------------|-------------------------|-----|------|----------|-----|------|-------|------|------|-------|------|------|-------|--------|-------|--------|--------|-------|-------|--------|-------|------|---|--------|-------|
| Alpha-2-HS-glycoprotein<br>OS=Bos taurus<br>GN=AHSG PE=1<br>SV=2 | sp P12763 FETUA_BOVIN, tr B0JYN6 B0JYN6_BOVIN | qDG<br>QFS<br>VLFT<br>k | 95% | 61.7 | 53.50248 | Ref | 0.37 | 0.2   | 0.74 | 0.56 | 0.13  | 0.78 | 0.19 | 61700 | 74300  | 71600 | 117000 | 114000 | 73700 | 1E+05 | 79800  | 939.5 | 1877 | 2 | 0.0155 | 8.246 |
| Alpha-2-HS-glycoprotein<br>OS=Bos taurus<br>GN=AHSG PE=1<br>SV=2 | sp P12763 FETUA_BOVIN, tr B0JYN6 B0JYN6_BOVIN | qDG<br>QFS<br>VLFT<br>k | 94% | 50.6 | 53.492   | Ref | 0.56 | 0.15  | 0.54 | 0.53 | -0.21 | 0.91 | 0.49 | 80700 | 124000 | 1E+05 | 149000 | 162000 | 85200 | 2E+05 | 143000 | 626.7 | 1877 | 3 | 0.0153 | 8.122 |
| Alpha-2-HS-glycoprotein<br>OS=Bos taurus<br>GN=AHSG PE=1<br>SV=2 | sp P12763 FETUA_BOVIN, tr B0JYN6 B0JYN6_BOVIN | qDG<br>QFS<br>VLFT<br>k | 92% | 48.4 | 53.51864 | Ref | 0.58 | 0.069 | 0.56 | 0.3  | 0.34  | 0.52 | 0.36 | 437   | 457    | 349   | 550    | 507    | 454   | 537   | 479    | 626.7 | 1877 | 3 | 0.0141 | 7.531 |
| Alpha-2-HS-glycoprotein<br>OS=Bos taurus<br>GN=AHSG PE=1<br>SV=2 | sp P12763 FETUA_BOVIN, tr B0JYN6 B0JYN6_BOVIN | qDG<br>QFS<br>VLFT<br>k | 63% | 35   | 53.41053 | Ref | 0.39 | 0.26  | 0.49 | 0.36 | 0.1   | 0.6  | 0.54 | 21300 | 19800  | 19700 | 25800  | 26100  | 19000 | 28000 | 26800  | 626.7 | 1877 | 3 | 0.011  | 5.87  |
| Alpha-2-HS-glycoprotein<br>OS=Bos taurus<br>GN=AHSG PE=1<br>SV=2 | sp P12763 FETUA_BOVIN, tr B0JYN6 B0JYN6_BOVIN | qDG<br>QFS<br>VLFT<br>k | 95% | 52   | 53.43515 | Ref | 0.52 | 0.23  | 0.39 | 0.35 | -0.12 | 0.85 | 0.7  | 5E+05 | 613000 | 5E+05 | 679000 | 731000 | 5E+05 | 9E+05 | 844000 | 626.7 | 1877 | 3 | 0.0099 | 5.294 |
| Alpha-2-HS-glycoprotein<br>OS=Bos taurus<br>GN=AHSG PE=1<br>SV=2 | sp P12763 FETUA_BOVIN, tr B0JYN6 B0JYN6_BOVIN | qDG<br>QFS<br>VLFT<br>k | 92% | 47.3 | 53.36504 | Ref | 0.59 | 0.01  | 0.42 | 0.39 | 0.33  | 0.77 | 0.41 | 3820  | 4920   | 3570  | 5310   | 5750   | 4820  | 6800  | 5270   | 626.7 | 1877 | 3 | 0.0074 | 3.921 |

|                                                                  |                                                               |   |     |      |          |     |      |      |       |      |       |      |      |       |       |       |        |        |       |       |        |       |      |   |        |       |
|------------------------------------------------------------------|---------------------------------------------------------------|---|-----|------|----------|-----|------|------|-------|------|-------|------|------|-------|-------|-------|--------|--------|-------|-------|--------|-------|------|---|--------|-------|
| Alpha-2-HS-glycoprotein<br>OS=Bos taurus<br>GN=AHSG PE=1<br>SV=2 | sp P12763 FETUA_BOVIN,tri qDG QFS VLFT<br>B0JYN6 B0JYN6_BOVIN | k | 92% | 47.2 | 53.35506 | Ref | 0.64 | 0.24 | 0.4   | 0.39 | 0.005 | 0.54 | 0.63 | 2440  | 2990  | 2470  | 3100   | 3400   | 2270  | 3420  | 3620   | 626.7 | 1877 | 3 | 0.0072 | 3.825 |
| Alpha-2-HS-glycoprotein<br>OS=Bos taurus<br>GN=AHSG PE=1<br>SV=2 | sp P12763 FETUA_BOVIN,tri qDG QFS VLFT<br>B0JYN6 B0JYN6_BOVIN | k | 88% | 41.9 | 53.32513 | Ref | 0.26 | 0.15 | 0.48  | 0.52 | 0.19  | 0.7  | 0.7  | 4850  | 5370  | 5410  | 7640   | 8610   | 5980  | 8920  | 8860   | 470.3 | 1877 | 4 | 0.0051 | 2.726 |
| Alpha-2-HS-glycoprotein<br>OS=Bos taurus<br>GN=AHSG PE=1<br>SV=2 | sp P12763 FETUA_BOVIN,tri qDG QFS VLFT<br>B0JYN6 B0JYN6_BOVIN | k | 74% | 37   | 53.27263 | Ref | 0.42 | 0.19 | 0.64  | 0.45 | 0.047 | 0.77 | 0.33 | 9610  | 10500 | 9730  | 14900  | 14400  | 9500  | 16400 | 12000  | 939.5 | 1877 | 2 | 0.0047 | 2.517 |
| Alpha-2-HS-glycoprotein<br>OS=Bos taurus<br>GN=AHSG PE=1<br>SV=2 | sp P12763 FETUA_BOVIN,tri qDG QFS VLFT<br>B0JYN6 B0JYN6_BOVIN | k | 94% | 51.4 | 53.2107  | Ref | 0.7  | 0.54 | -0.15 | 0.14 | 0.11  | 0.85 | 0.41 | 143   | 170   | 165   | 115    | 154    | 132   | 230   | 169    | 626.7 | 1877 | 3 | 0.0015 | 0.806 |
| Alpha-2-HS-glycoprotein<br>OS=Bos taurus<br>GN=AHSG PE=1<br>SV=2 | sp P12763 FETUA_BOVIN,tri qDG QFS VLFT<br>B0JYN6 B0JYN6_BOVIN | k | 95% | 57.8 | 53.51864 | Ref | 0.36 | 0.19 | 0.58  | 0.47 | 0.092 | 0.76 | 0.32 | 93900 | 91300 | 88000 | 129000 | 132000 | 88600 | 1E+05 | 107000 | 626.7 | 1877 | 3 | 0.014  | 7.435 |
| Alpha-2-HS-glycoprotein<br>OS=Bos taurus<br>GN=AHSG PE=1<br>SV=2 | sp P12763 FETUA_BOVIN,tri qDG QFS VLFT<br>B0JYN6 B0JYN6_BOVIN | k | 95% | 57.3 | 53.5188  | Ref | 0.33 | 0.2  | 0.46  | 0.45 | -0.09 | 0.81 | 0.7  | 12100 | 13300 | 13100 | 17600  | 19400  | 11600 | 22600 | 20800  | 626.7 | 1877 | 3 | 0.0145 | 7.723 |

|                                                                  |                                               |                         |     |      |          |     |      |       |      |      |       |      |      |      |      |      |      |      |      |      |      |       |      |   |        |       |
|------------------------------------------------------------------|-----------------------------------------------|-------------------------|-----|------|----------|-----|------|-------|------|------|-------|------|------|------|------|------|------|------|------|------|------|-------|------|---|--------|-------|
| Alpha-2-HS-glycoprotein<br>OS=Bos taurus<br>GN=AHSG PE=1<br>SV=2 | sp P12763 FETUA_BOVIN,tri B0JYN6 B0JYN6_BOVIN | qDG<br>QFS<br>VLFT<br>k | 95% | 67   | 53.4335  | Ref | 0.47 | 0.22  | 0.51 | 0.49 | -0.02 | 0.87 | 0.3  | 1360 | 1580 | 1440 | 1980 | 2150 | 1320 | 2560 | 1700 | 939.5 | 1877 | 2 | 0.0116 | 6.159 |
| Alpha-2-HS-glycoprotein<br>OS=Bos taurus<br>GN=AHSG PE=1<br>SV=2 | sp P12763 FETUA_BOVIN,tri B0JYN6 B0JYN6_BOVIN | qDG<br>QFS<br>VLFT<br>k | 94% | 51.2 | 53.45707 | Ref | 0.58 | 0.083 | 0.55 | 0.29 | 0.2   | 0.58 | 0.6  | 2440 | 2960 | 2280 | 3530 | 3260 | 2660 | 3630 | 3640 | 626.7 | 1877 | 3 | 0.0125 | 6.652 |
| Alpha-2-HS-glycoprotein<br>OS=Bos taurus<br>GN=AHSG PE=1<br>SV=2 | sp P12763 FETUA_BOVIN,tri B0JYN6 B0JYN6_BOVIN | qDG<br>QFS<br>VLFT<br>k | 95% | 53.9 | 53.27682 | Ref | 0.39 | 0.18  | 0.59 | 0.59 | 0.084 | 0.79 | 0.29 | 683  | 775  | 727  | 1080 | 1190 | 735  | 1260 | 882  | 939.5 | 1877 | 2 | 0.0049 | 2.592 |
| Alpha-2-HS-glycoprotein<br>OS=Bos taurus<br>GN=AHSG PE=1<br>SV=2 | sp P12763 FETUA_BOVIN,tri B0JYN6 B0JYN6_BOVIN | qDG<br>QFS<br>VLFT<br>k | 95% | 54   | 53.49746 | Ref | 0.65 | 0.26  | 0.52 | 0.32 | -0.04 | 0.86 | 0.31 | 524  | 718  | 594  | 801  | 771  | 523  | 1020 | 693  | 939.5 | 1877 | 2 | 0.0132 | 7.011 |
| Alpha-2-HS-glycoprotein<br>OS=Bos taurus<br>GN=AHSG PE=1<br>SV=2 | sp P12763 FETUA_BOVIN,tri B0JYN6 B0JYN6_BOVIN | qDG<br>QFS<br>VLFT<br>k | 95% | 54.4 | 53.43572 | Ref | 0.43 | 0.091 | 0.51 | 0.55 | -0.06 | 0.76 | 0.54 | 1230 | 1360 | 1170 | 1750 | 1980 | 1130 | 2090 | 1780 | 626.7 | 1877 | 3 | 0.0096 | 5.103 |
| Alpha-2-HS-glycoprotein<br>OS=Bos taurus<br>GN=AHSG PE=1<br>SV=2 | sp P12763 FETUA_BOVIN,tri B0JYN6 B0JYN6_BOVIN | qDG<br>QFSV<br>LFTk     | 95% | 53.6 | 53.5566  | Ref | 0.51 | 0.33  | 0.32 | 0.21 | 0.26  | 0.66 | 0.38 | 3450 | 3230 | 3080 | 3440 | 3520 | 3180 | 4380 | 3580 | 627   | 1878 | 3 | 0.0158 | 8.41  |

|                                                                  |                                               |                                   |     |      |          |     |      |      |      |      |       |      |      |       |       |       |       |       |       |       |       |      |        |   |        |       |
|------------------------------------------------------------------|-----------------------------------------------|-----------------------------------|-----|------|----------|-----|------|------|------|------|-------|------|------|-------|-------|-------|-------|-------|-------|-------|-------|------|--------|---|--------|-------|
| Alpha-2-HS-glycoprotein<br>OS=Bos taurus<br>GN=AHSG PE=1<br>SV=2 | sp P12763 FETUA_BOVIN,tri B0JYN6 B0JYN6_BOVIN | qQT<br>QHA<br>VEG<br>DcDI<br>HVLk | 67% | 34.1 | 51.66264 | Ref | 0.41 | 0.23 | 0.67 | 0.35 | -0.02 | 1.1  | 0.2  | 25900 | 36300 | 34900 | 52800 | 46700 | 31600 | 71600 | 38200 | 752  | 2253.1 | 3 | 0.0252 | 11.18 |
| Alpha-2-HS-glycoprotein<br>OS=Bos taurus<br>GN=AHSG PE=1<br>SV=2 | sp P12763 FETUA_BOVIN,tri B0JYN6 B0JYN6_BOVIN | qQT<br>QHA<br>VEG<br>DcDI<br>HVLk | 95% | 71.8 | 51.69918 | Ref | 0.58 | 0.4  | 0.49 | 0.32 | 0.12  | 0.73 | 0.36 | 918   | 1200  | 1150  | 1380  | 1350  | 1030  | 1630  | 1260  | 1128 | 2253.1 | 2 | 0.0249 | 11.04 |
| Alpha-2-HS-glycoprotein<br>OS=Bos taurus<br>GN=AHSG PE=1<br>SV=2 | sp P12763 FETUA_BOVIN,tri B0JYN6 B0JYN6_BOVIN | qQT<br>QHA<br>VEG<br>DcDI<br>HVLk | 79% | 37.6 | 51.87977 | Ref | 0.59 | 0.16 | 0.5  | 0.41 | 0.07  | 0.88 | 0.32 | 22800 | 31400 | 25200 | 35900 | 37100 | 25600 | 46900 | 31600 | 752  | 2253.1 | 3 | 0.0202 | 8.981 |
| Alpha-2-HS-glycoprotein<br>OS=Bos taurus<br>GN=AHSG PE=1<br>SV=2 | sp P12763 FETUA_BOVIN,tri B0JYN6 B0JYN6_BOVIN | qQT<br>QHA<br>VEG<br>DcDI<br>HVLk | 78% | 37.7 | 52.06699 | Ref | 0.59 | 0.16 | 0.4  | 0.65 | -0.29 | 0.87 | 0.48 | 15900 | 22600 | 18200 | 24000 | 31500 | 14400 | 33600 | 25300 | 752  | 2253.1 | 3 | 0.0153 | 6.785 |
| Alpha-2-HS-glycoprotein<br>OS=Bos taurus<br>GN=AHSG PE=1<br>SV=2 | sp P12763 FETUA_BOVIN,tri B0JYN6 B0JYN6_BOVIN | qQT<br>QHA<br>VEG<br>DcDI<br>HVLk | 95% | 54   | 52.24727 | Ref | 0.48 | 0.24 | 0.23 | 0.32 | 0.29  | 0.89 | 0.4  | 12400 | 14000 | 12900 | 14300 | 16800 | 14400 | 22900 | 16100 | 752  | 2253.1 | 3 | 0.0111 | 4.922 |
| Alpha-2-HS-glycoprotein<br>OS=Bos taurus<br>GN=AHSG PE=1<br>SV=2 | sp P12763 FETUA_BOVIN,tri B0JYN6 B0JYN6_BOVIN | qQT<br>QHA<br>VEG<br>DcDI<br>HVLk | 76% | 37.6 | 52.59266 | Ref | 0.4  | 0.33 | 0.49 | 0.37 | 0.011 | 1    | 0.14 | 27700 | 30600 | 31600 | 39600 | 40300 | 27400 | 58100 | 31000 | 752  | 2253.1 | 3 | 0.0025 | 1.102 |

|                                                                  |                                               |                                   |     |      |          |     |      |      |      |      |       |      |      |       |       |       |       |       |       |       |       |      |        |   |        |       |
|------------------------------------------------------------------|-----------------------------------------------|-----------------------------------|-----|------|----------|-----|------|------|------|------|-------|------|------|-------|-------|-------|-------|-------|-------|-------|-------|------|--------|---|--------|-------|
| Alpha-2-HS-glycoprotein<br>OS=Bos taurus<br>GN=AHSG PE=1<br>SV=2 | sp P12763 FETUA_BOVIN,tri B0JYN6 B0JYN6_BOVIN | qQT<br>QHA<br>VEG<br>DcDI<br>HVLk | 95% | 60.7 | 52.66269 | Ref | 0.7  | 0.11 | 0.62 | 0.38 | -0.16 | 0.85 | 0.18 | 659   | 846   | 609   | 975   | 911   | 549   | 1160  | 718   | 1128 | 2253.1 | 2 | #####  | 0.227 |
| Alpha-2-HS-glycoprotein<br>OS=Bos taurus<br>GN=AHSG PE=1<br>SV=2 | sp P12763 FETUA_BOVIN,tri B0JYN6 B0JYN6_BOVIN | qQT<br>QHA<br>VEG<br>DcDI<br>HVLk | 75% | 37.4 | 52.73932 | Ref | 0.52 | 0.1  | 0.48 | 0.41 | 0.2   | 0.92 | 0.31 | 12900 | 16800 | 13700 | 20000 | 21100 | 15900 | 27400 | 17700 | 752  | 2253.1 | 3 | 0.0017 | 0.761 |
| Alpha-2-HS-glycoprotein<br>OS=Bos taurus<br>GN=AHSG PE=1<br>SV=2 | sp P12763 FETUA_BOVIN,tri B0JYN6 B0JYN6_BOVIN | qQT<br>QHA<br>VEG<br>DcDI<br>HVLk | 88% | 42.3 | 52.01037 | Ref | 0.43 | 0.16 | 0.4  | 0.54 | -0.05 | 1.1  | 0.25 | 54200 | 68100 | 61300 | 81200 | 98800 | 57400 | 1E+05 | 73400 | 752  | 2253.1 | 3 | 0.0169 | 7.517 |
| Alpha-2-HS-glycoprotein<br>OS=Bos taurus<br>GN=AHSG PE=1<br>SV=2 | sp P12763 FETUA_BOVIN,tri B0JYN6 B0JYN6_BOVIN | qQT<br>QHA<br>VEG<br>DcDI<br>HVLk | 95% | 64.3 | 52.25299 | Ref | 0.46 | 0.12 | 0.53 | 0.29 | 0.28  | 0.99 | 0.46 | 153   | 240   | 206   | 306   | 286   | 248   | 425   | 290   | 1128 | 2253.1 | 2 | 0.0112 | 4.972 |
| Alpha-2-HS-glycoprotein<br>OS=Bos taurus<br>GN=AHSG PE=1<br>SV=2 | sp P12763 FETUA_BOVIN,tri B0JYN6 B0JYN6_BOVIN | qQT<br>QHA<br>VEG<br>DcDI<br>HVLk | 86% | 41.1 | 52.1786  | Ref | 0.6  | 0.28 | 0.43 | 0.41 | 0.22  | 0.72 | 0.37 | 3820  | 5260  | 4550  | 5700  | 6170  | 4710  | 6960  | 5430  | 752  | 2253.1 | 3 | 0.0126 | 5.574 |
| Alpha-2-HS-glycoprotein<br>OS=Bos taurus<br>GN=AHSG PE=1<br>SV=2 | sp P12763 FETUA_BOVIN,tri B0JYN6 B0JYN6_BOVIN | qQT<br>QHA<br>VEG<br>DcDI<br>HVLk | 61% | 33.3 | 52.08511 | Ref | 0.62 | 0.22 | 0.4  | 0.29 | 0.16  | 0.96 | 0.25 | 1900  | 2610  | 2150  | 2730  | 2780  | 2220  | 4040  | 2460  | 752  | 2253.1 | 3 | 0.0142 | 6.306 |

|                                                                  |                                               |                                   |     |      |          |     |      |      |      |      |       |      |      |       |       |       |       |       |       |       |       |       |        |   |        |       |
|------------------------------------------------------------------|-----------------------------------------------|-----------------------------------|-----|------|----------|-----|------|------|------|------|-------|------|------|-------|-------|-------|-------|-------|-------|-------|-------|-------|--------|---|--------|-------|
| Alpha-2-HS-glycoprotein<br>OS=Bos taurus<br>GN=AHSG PE=1<br>SV=2 | sp P12763 FETUA_BOVIN,tri B0JYN6 B0JYN6_BOVIN | qQT<br>QHA<br>VEG<br>DcDI<br>HVLk | 80% | 38.7 | 52.24349 | Ref | 0.47 | 0.32 | 0.55 | 0.39 | 0.073 | 0.92 | 0.35 | 605   | 863   | 847   | 1120  | 1090  | 769   | 1440  | 963   | 752   | 2253.1 | 3 | 0.0109 | 4.842 |
| Alpha-2-HS-glycoprotein<br>OS=Bos taurus<br>GN=AHSG PE=1<br>SV=2 | sp P12763 FETUA_BOVIN,tri B0JYN6 B0JYN6_BOVIN | qQT<br>QHA<br>VEG<br>DcDI<br>HVLk | 81% | 39   | 52.24248 | Ref | 0.64 | 0.39 | 0.3  | 0.47 | 0.094 | 0.74 | 0.33 | 387   | 530   | 485   | 512   | 632   | 426   | 697   | 520   | 752   | 2253.1 | 3 | 0.0107 | 4.762 |
| Alpha-2-HS-glycoprotein<br>OS=Bos taurus<br>GN=AHSG PE=1<br>SV=2 | sp P12763 FETUA_BOVIN,tri B0JYN6 B0JYN6_BOVIN | qQT<br>QHA<br>VEG<br>DcDI<br>HVLk | 92% | 48.8 | 54.71951 | Ref | 0.3  | 0.21 | 0.54 | 0.43 | 0.25  | 0.92 | 0.31 | 16300 | 18300 | 18700 | 26300 | 26700 | 20600 | 34300 | 22300 | 859.1 | 2574.3 | 3 | 0.0228 | 8.841 |
| Alpha-2-HS-glycoprotein<br>OS=Bos taurus<br>GN=AHSG PE=1<br>SV=2 | sp P12763 FETUA_BOVIN,tri B0JYN6 B0JYN6_BOVIN | qQT<br>QHA<br>VEG<br>DcDI<br>HVLk | 67% | 35.5 | 54.76033 | Ref | 0.26 | 0.25 | 0.59 | 0.52 | 0.11  | 0.77 | 0.42 | 22700 | 23300 | 25100 | 35700 | 37400 | 24500 | 40600 | 31500 | 644.6 | 2574.3 | 4 | 0.0209 | 8.105 |
| Alpha-2-HS-glycoprotein<br>OS=Bos taurus<br>GN=AHSG PE=1<br>SV=2 | sp P12763 FETUA_BOVIN,tri B0JYN6 B0JYN6_BOVIN | qQT<br>QHA<br>VEG<br>DcDI<br>HVLk | 91% | 48.3 | 54.67944 | Ref | 0.53 | -0.2 | 0.53 | 0.53 | 0.16  | 1    | 0.13 | 6670  | 8170  | 5370  | 9980  | 11000 | 7440  | 14100 | 7570  | 859.1 | 2574.3 | 3 | 0.0189 | 7.338 |
| Alpha-2-HS-glycoprotein<br>OS=Bos taurus<br>GN=AHSG PE=1<br>SV=2 | sp P12763 FETUA_BOVIN,tri B0JYN6 B0JYN6_BOVIN | qQT<br>QHA<br>VEG<br>DcDI<br>HVLk | 87% | 44.6 | 54.73937 | Ref | 0.52 | 0.29 | 0.58 | 0.48 | -0.09 | 0.82 | 0.37 | 4230  | 5720  | 5290  | 7260  | 7510  | 4410  | 8660  | 6280  | 859.1 | 2574.3 | 3 | 0.0217 | 8.41  |

|                                                                  |                                               |                                   |     |      |          |     |      |      |      |      |       |      |       |       |        |       |        |        |       |       |        |       |        |   |        |       |
|------------------------------------------------------------------|-----------------------------------------------|-----------------------------------|-----|------|----------|-----|------|------|------|------|-------|------|-------|-------|--------|-------|--------|--------|-------|-------|--------|-------|--------|---|--------|-------|
| Alpha-2-HS-glycoprotein<br>OS=Bos taurus<br>GN=AHSG PE=1<br>SV=2 | sp P12763 FETUA_BOVIN,tri B0JYN6_BOJYN6_BOVIN | qQT<br>QHA<br>VEG<br>DcDI<br>HVLk | 76% | 39.7 | 54.73328 | Ref | 0.69 | 0.11 | 0.67 | 0.36 | 0.23  | 0.9  | -0.11 | 2970  | 4410   | 3200  | 5290   | 4700   | 3760  | 6250  | 3090   | 859.1 | 2574.3 | 3 | 0.0215 | 8.34  |
| Alpha-2-HS-glycoprotein<br>OS=Bos taurus<br>GN=AHSG PE=1<br>SV=2 | sp P12763 FETUA_BOVIN,tri B0JYN6_BOJYN6_BOVIN | qQT<br>QHA<br>VEG<br>DcDI<br>HVLk | 95% | 54.5 | 54.75751 | Ref | 0.52 | 0.22 | 0.69 | 0.42 | 0.094 | 0.67 | 0.13  | 1E+05 | 159000 | 1E+05 | 218000 | 199000 | 1E+05 | 2E+05 | 147000 | 859.1 | 2574.3 | 3 | 0.02   | 7.769 |
| Alpha-2-HS-glycoprotein<br>OS=Bos taurus<br>GN=AHSG PE=1<br>SV=2 | sp P12763 FETUA_BOVIN,tri B0JYN6_BOJYN6_BOVIN | qQT<br>QHA<br>VEG<br>DcDI<br>HVLk | 95% | 69.4 | 54.75767 | Ref | 0.37 | 0.23 | 0.62 | 0.5  | -0.05 | 0.92 | 0.35  | 4660  | 5730   | 5640  | 8300   | 8390   | 5000  | 10200 | 6830   | 1288  | 2574.3 | 2 | 0.02   | 7.767 |
| Alpha-2-HS-glycoprotein<br>OS=Bos taurus<br>GN=AHSG PE=1<br>SV=2 | sp P12763 FETUA_BOVIN,tri B0JYN6_BOJYN6_BOVIN | qQT<br>QHA<br>VEG<br>DcDI<br>HVLk | 71% | 36.4 | 54.78819 | Ref | 0.57 | 0.29 | 0.42 | 0.43 | 0.091 | 0.83 | 0.4   | 2E+05 | 237000 | 2E+05 | 259000 | 288000 | 2E+05 | 3E+05 | 256000 | 644.6 | 2574.3 | 4 | 0.0194 | 7.53  |
| Alpha-2-HS-glycoprotein<br>OS=Bos taurus<br>GN=AHSG PE=1<br>SV=2 | sp P12763 FETUA_BOVIN,tri B0JYN6_BOJYN6_BOVIN | qQT<br>QHA<br>VEG<br>DcDI<br>HVLk | 81% | 39.3 | 54.71949 | Ref | 0.44 | 0.35 | 0.61 | 0.6  | 0.053 | 0.77 | 0.19  | 3E+05 | 398000 | 4E+05 | 542000 | 594000 | 4E+05 | 6E+05 | 406000 | 644.6 | 2574.3 | 4 | 0.0177 | 6.878 |
| Alpha-2-HS-glycoprotein<br>OS=Bos taurus<br>GN=AHSG PE=1<br>SV=2 | sp P12763 FETUA_BOVIN,tri B0JYN6_BOJYN6_BOVIN | qQT<br>QHA<br>VEG<br>DcDI<br>HVLk | 73% | 36.9 | 54.79026 | Ref | 0.47 | 0.13 | 0.56 | 0.5  | 0.016 | 0.8  | 0.33  | 18600 | 20400  | 17500 | 26400  | 27900  | 17500 | 31500 | 22500  | 644.6 | 2574.3 | 4 | 0.0131 | 5.076 |



|                                                                  |                                               |                                   |     |      |          |     |      |       |      |      |       |      |       |       |        |       |        |        |       |       |        |       |        |   |        |       |
|------------------------------------------------------------------|-----------------------------------------------|-----------------------------------|-----|------|----------|-----|------|-------|------|------|-------|------|-------|-------|--------|-------|--------|--------|-------|-------|--------|-------|--------|---|--------|-------|
| Alpha-2-HS-glycoprotein<br>OS=Bos taurus<br>GN=AHSG PE=1<br>SV=2 | sp P12763 FETUA_BOVIN,tri B0JYN6 B0JYN6_BOVIN | qQT<br>QHA<br>VEG<br>DcDI<br>HVLk | 56% | 33.2 | 54.78946 | Ref | 0.52 | 0.44  | 0.37 | 0.38 | 0.03  | 0.93 | -0.13 | 201   | 200    | 205   | 219    | 244    | 167   | 326   | 154    | 644.6 | 2574.3 | 4 | 0.0128 | 4.983 |
| Alpha-2-HS-glycoprotein<br>OS=Bos taurus<br>GN=AHSG PE=1<br>SV=2 | sp P12763 FETUA_BOVIN,tri B0JYN6 B0JYN6_BOVIN | qQT<br>QHA<br>VEG<br>DcDI<br>HVLk | 65% | 34.9 | 54.63872 | Ref | 0.43 | 0.15  | 0.59 | 0.43 | 0.013 | 0.94 | 0.34  | 2E+05 | 286000 | 3E+05 | 389000 | 383000 | 3E+05 | 5E+05 | 327000 | 644.6 | 2574.3 | 4 | 0.0262 | 10.19 |
| Alpha-2-HS-glycoprotein<br>OS=Bos taurus<br>GN=AHSG PE=1<br>SV=2 | sp P12763 FETUA_BOVIN,tri B0JYN6 B0JYN6_BOVIN | qQT<br>QHA<br>VEG<br>DcDI<br>HVLk | 91% | 45.5 | 54.7189  | Ref | 0.66 | 0.28  | 0.6  | 0.31 | -0.17 | 0.71 | 0.67  | 612   | 1040   | 870   | 1230   | 1100   | 691   | 1330  | 1280   | 1288  | 2574.3 | 2 | 0.0229 | 8.9   |
| Alpha-2-HS-glycoprotein<br>OS=Bos taurus<br>GN=AHSG PE=1<br>SV=2 | sp P12763 FETUA_BOVIN,tri B0JYN6 B0JYN6_BOVIN | qQT<br>QHA<br>VEG<br>DcDI<br>HVLk | 95% | 53.7 | 54.71872 | Ref | 0.44 | 0.35  | 0.48 | 0.52 | 0.092 | 0.78 | 0.29  | 3300  | 3870   | 3930  | 4850   | 5500   | 3560  | 5980  | 4240   | 859.1 | 2574.3 | 3 | 0.0224 | 8.689 |
| Alpha-2-HS-glycoprotein<br>OS=Bos taurus<br>GN=AHSG PE=1<br>SV=2 | sp P12763 FETUA_BOVIN,tri B0JYN6 B0JYN6_BOVIN | qQT<br>QHA<br>VEG<br>DcDI<br>HVLk | 89% | 43.6 | 54.71789 | Ref | 0.42 | 0.21  | 0.5  | 0.46 | 0.12  | 0.85 | 0.33  | 25800 | 28800  | 27100 | 37100  | 39700  | 27500 | 47700 | 33100  | 644.6 | 2574.3 | 4 | 0.0172 | 6.676 |
| Alpha-2-HS-glycoprotein<br>OS=Bos taurus<br>GN=AHSG PE=1<br>SV=2 | sp P12763 FETUA_BOVIN,tri B0JYN6 B0JYN6_BOVIN | qQT<br>QHA<br>VEG<br>DcDI<br>HVLk | 71% | 36.4 | 54.72563 | Ref | 0.45 | 0.096 | 0.57 | 0.53 | 0.28  | 0.69 | 0.25  | 1630  | 1790   | 1520  | 2380   | 2540   | 1870  | 2600  | 1900   | 644.6 | 2574.3 | 4 | 0.017  | 6.583 |

|                                                                  |                                               |                                   |     |      |          |     |      |      |      |      |       |      |       |      |      |      |      |      |      |       |      |       |        |   |        |       |
|------------------------------------------------------------------|-----------------------------------------------|-----------------------------------|-----|------|----------|-----|------|------|------|------|-------|------|-------|------|------|------|------|------|------|-------|------|-------|--------|---|--------|-------|
| Alpha-2-HS-glycoprotein<br>OS=Bos taurus<br>GN=AHSG PE=1<br>SV=2 | sp P12763 FETUA_BOVIN,tri B0JYN6 B0JYN6_BOVIN | qQT<br>QHA<br>VEG<br>DcDI<br>HVLk | 95% | 59   | 54.73845 | Ref | 0.49 | 0.19 | 0.54 | 0.53 | -0.09 | 0.93 | 0.2   | 865  | 1020 | 902  | 1290 | 1410 | 799  | 1690  | 1020 | 859.1 | 2574.3 | 3 | 0.016  | 6.208 |
| Alpha-2-HS-glycoprotein<br>OS=Bos taurus<br>GN=AHSG PE=1<br>SV=2 | sp P12763 FETUA_BOVIN,tri B0JYN6 B0JYN6_BOVIN | qQT<br>QHA<br>VEG<br>DcDI<br>HVLk | 66% | 35.2 | 54.7384  | Ref | 0.36 | 0.2  | 0.62 | 0.55 | 0.037 | 0.92 | 0.16  | 2000 | 2200 | 2140 | 3230 | 3390 | 2070 | 3980  | 2340 | 644.6 | 2574.3 | 4 | 0.016  | 6.21  |
| Alpha-2-HS-glycoprotein<br>OS=Bos taurus<br>GN=AHSG PE=1<br>SV=2 | sp P12763 FETUA_BOVIN,tri B0JYN6 B0JYN6_BOVIN | qQT<br>QHA<br>VEG<br>DcDI<br>HVLk | 80% | 41.3 | 54.82409 | Ref | 0.62 | 0.24 | 0.81 | 0.34 | -0.03 | 0.79 | 0.21  | 263  | 408  | 340  | 568  | 451  | 305  | 563   | 374  | 859.1 | 2574.3 | 3 | 0.0103 | 4.006 |
| Alpha-2-HS-glycoprotein<br>OS=Bos taurus<br>GN=AHSG PE=1<br>SV=2 | sp P12763 FETUA_BOVIN,tri B0JYN6 B0JYN6_BOVIN | qQT<br>QHA<br>VEG<br>DcDI<br>HVLk | 59% | 35.8 | 54.82409 | Ref | 0.51 | 0.15 | 0.58 | 0.38 | 0.26  | 0.92 | 0.2   | 250  | 342  | 290  | 438  | 419  | 336  | 554   | 334  | 859.1 | 2574.3 | 3 | 0.0103 | 4.006 |
| Alpha-2-HS-glycoprotein<br>OS=Bos taurus<br>GN=AHSG PE=1<br>SV=2 | sp P12763 FETUA_BOVIN,tri B0JYN6 B0JYN6_BOVIN | qQT<br>qHA<br>VEG<br>DcDI<br>HVLk | 74% | 38.8 | 54.4576  | Ref | 0.37 | 0.14 | 0.56 | 0.43 | 0.19  | 0.94 | 0.39  | 5140 | 6600 | 6090 | 9160 | 9220 | 6790 | 12000 | 8110 | 859.4 | 2575.3 | 3 | 0.0201 | 7.792 |
| Alpha-2-HS-glycoprotein<br>OS=Bos taurus<br>GN=AHSG PE=1<br>SV=2 | sp P12763 FETUA_BOVIN,tri B0JYN6 B0JYN6_BOVIN | qQT<br>qHA<br>VEG<br>DcDI<br>HVLk | 87% | 43.9 | 54.42578 | Ref | 0.53 | 0.24 | 0.53 | 0.39 | 0.19  | 0.91 | 0.095 | 3200 | 4020 | 3560 | 4890 | 4900 | 3710 | 6400  | 3610 | 859.4 | 2575.3 | 3 | 0.0219 | 8.502 |

|                                                                  |                                              |                                 |     |      |          |     |                         |                              |                              |                        |                               |                                   |                                 |                               |                              |                                |                        |                               |                                   |                               |        |       |      |   |        |       |  |
|------------------------------------------------------------------|----------------------------------------------|---------------------------------|-----|------|----------|-----|-------------------------|------------------------------|------------------------------|------------------------|-------------------------------|-----------------------------------|---------------------------------|-------------------------------|------------------------------|--------------------------------|------------------------|-------------------------------|-----------------------------------|-------------------------------|--------|-------|------|---|--------|-------|--|
| Alpha-2-HS-glycoprotein<br>OS=Bos taurus<br>GN=AHSG PE=1<br>SV=2 | sp P12763 FETUA_BOVIN tr B0JYN6 B0JYN6_BOVIN | tPIV<br>GQP<br>SIPG<br>GPV<br>R | 68% | 35.1 | 52.28708 | Ref | 0.22                    | -0.29                        | 0.53                         | 0.32                   | -0.06                         | 0.55                              | 0.56                            | 1700                          | 905                          | 690                            | 1360                   | 1310                          | 872                               | 1390                          | 1390   | 593.7 | 1778 | 3 | 0.0095 | 5.346 |  |
| Alpha-2-HS-glycoprotein<br>OS=Bos taurus<br>GN=AHSG PE=1<br>SV=2 | sp P12763 FETUA_BOVIN tr B0JYN6 B0JYN6_BOVIN | tPIV<br>GQP<br>SIPG<br>GPV<br>R | 88% | 40.9 | 52.39079 | Ref | 0.31                    | 0.3                          | 0.55                         | 0.53                   | 0.064                         | 0.72                              | 0.48                            | 7330                          | 7910                         | 8520                           | 11300                  | 12400                         | 7800                              | 12800                         | 10800  | 890   | 1778 | 2 | 0.0184 | 10.35 |  |
| Alpha-2-HS-glycoprotein<br>OS=Bos taurus<br>GN=AHSG PE=1<br>SV=2 | sp P12763 FETUA_BOVIN tr B0JYN6 B0JYN6_BOVIN | tPIV<br>GQP<br>SIPG<br>GPV<br>R | 88% | 41   | 52.33521 | Ref | 0.55                    | 0.31                         | 0.48                         | 0.38                   | 0.24                          | 0.59                              | 0.32                            | 5240                          | 5820                         | 5360                           | 6770                   | 6970                          | 5510                              | 7320                          | 6050   | 890   | 1778 | 2 | 0.0141 | 7.945 |  |
| Alpha-2-HS-glycoprotein<br>OS=Bos taurus<br>GN=AHSG PE=1<br>SV=2 | sp P12763 FETUA_BOVIN tr B0JYN6 B0JYN6_BOVIN | tPIV<br>GQP<br>SIPG<br>GPV<br>R | 90% | 44.3 | 52.29999 | Ref | No Values (-0.15175138) | No Values (-0.2694445678216) | Reference Missing (0.567186) | No Values (-0.5765186) | Reference Missing (0.8969834) | Reference Missing (0.93136525455) | Reference Missing (1.024455413) | No Values (-0.35410.15175138) | No Values (-0.2694445678216) | Reference Missing (0.56778216) | No Values (-0.5765186) | Reference Missing (0.8969834) | Reference Missing (0.93136525455) | Reference Missing (1.0244555) |        |       |      |   |        |       |  |
| Alpha-2-HS-glycoprotein<br>OS=Bos taurus<br>GN=AHSG PE=1<br>SV=2 | sp P12763 FETUA_BOVIN tr B0JYN6 B0JYN6_BOVIN | tPIV<br>GQP<br>SIPG<br>GPV<br>R | 95% | 57.1 | 52.21289 | Ref | 0.63                    | 0.23                         | 0.39                         | 0.53                   | 0.16                          | 0.89                              | 0.2                             | 4E+05                         | 646000                       | 5E+05                          | 668000                 | 813000                        | 5E+05                             | 9E+05                         | 584000 | 890   | 1778 | 2 | 0.0132 | 7.394 |  |
| Alpha-2-HS-glycoprotein<br>OS=Bos taurus<br>GN=AHSG PE=1<br>SV=2 | sp P12763 FETUA_BOVIN tr B0JYN6 B0JYN6_BOVIN | tPIV<br>GQP<br>SIPG<br>GPV<br>R | 95% | 50.2 | 52.21289 | Ref | 0.53                    | 0.36                         | 0.64                         | 0.49                   | -0.05                         | 0.83                              | 0.081                           | 92100                         | 119000                       | 1E+05                          | 157000                 | 155000                        | 93100                             | 2E+05                         | 106000 | 890   | 1778 | 2 | 0.0132 | 7.394 |  |

|                                                                  |                                               |                                 |     |      |          |     |                        |                          |                               |                               |                         |                               |                               |                          |                        |                          |                               |                               |                         |                               |                               |       |      |   |        |       |
|------------------------------------------------------------------|-----------------------------------------------|---------------------------------|-----|------|----------|-----|------------------------|--------------------------|-------------------------------|-------------------------------|-------------------------|-------------------------------|-------------------------------|--------------------------|------------------------|--------------------------|-------------------------------|-------------------------------|-------------------------|-------------------------------|-------------------------------|-------|------|---|--------|-------|
| Alpha-2-HS-glycoprotein<br>OS=Bos taurus<br>GN=AHSG PE=1<br>SV=2 | sp P12763 FETUA_BOVIN, tr B0JYN6 B0JYN6_BOVIN | tPIV<br>GQP<br>SIPG<br>GPV<br>R | 95% | 54.7 | 52.22797 | Ref | 0.65                   | 0.2                      | 0.44                          | 0.5                           | 0.14                    | 0.82                          | 0.38                          | 28500                    | 48600                  | 38600                    | 51200                         | 58400                         | 39800                   | 66900                         | 48800                         | 890   | 1778 | 2 | 0.008  | 4.516 |
| Alpha-2-HS-glycoprotein<br>OS=Bos taurus<br>GN=AHSG PE=1<br>SV=2 | sp P12763 FETUA_BOVIN, tr B0JYN6 B0JYN6_BOVIN | tPIV<br>GQP<br>SIPG<br>GPV<br>R | 93% | 45.5 | 52.25369 | Ref | 0.44                   | 0.21                     | 0.38                          | 0.52                          | 0.095                   | 0.84                          | 0.29                          | 4470                     | 4660                   | 4310                     | 5430                          | 6610                          | 4290                    | 7530                          | 5080                          | 890   | 1778 | 2 | 0.0134 | 7.529 |
| Alpha-2-HS-glycoprotein<br>OS=Bos taurus<br>GN=AHSG PE=1<br>SV=2 | sp P12763 FETUA_BOVIN, tr B0JYN6 B0JYN6_BOVIN | tPIV<br>GQP<br>SIPG<br>GPV<br>R | 85% | 40.8 | 52.21949 | Ref | No Values (0.10951202) | No Values (-0.008181496) | Reference Missing (0.8136926) | Reference Missing (0.5631437) | No Values (-0.11938308) | Reference Missing (0.7397987) | Reference Missing (0.7064825) | No Values (-0.092878185) | No Values (0.10951202) | No Values (-0.008181496) | Reference Missing (0.8136926) | Reference Missing (0.5631437) | No Values (-0.11938308) | Reference Missing (0.7397987) | Reference Missing (0.7064825) | 593.7 | 1778 | 3 | 0.0126 | 7.1   |
| Alpha-2-HS-glycoprotein<br>OS=Bos taurus<br>GN=AHSG PE=1<br>SV=2 | sp P12763 FETUA_BOVIN, tr B0JYN6 B0JYN6_BOVIN | tPIV<br>GQP<br>SIPG<br>GPV<br>R | 83% | 38.7 | 52.18701 | Ref | 0.49                   | 0.28                     | 0.6                           | 0.38                          | -0.13                   | 0.86                          | 0.45                          | 7800                     | 10100                  | 9460                     | 13300                         | 12600                         | 7690                    | 16000                         | 12000                         | 890   | 1778 | 2 | 0.0122 | 6.843 |
| Alpha-2-HS-glycoprotein<br>OS=Bos taurus<br>GN=AHSG PE=1<br>SV=2 | sp P12763 FETUA_BOVIN, tr B0JYN6 B0JYN6_BOVIN | tPIV<br>GQP<br>SIPG<br>GPV<br>R | 95% | 50.2 | 52.25369 | Ref | 0.47                   | 0.32                     | 0.55                          | 0.43                          | -0.07                   | 0.89                          | 0.22                          | 4030                     | 4620                   | 4530                     | 5960                          | 6030                          | 3740                    | 7580                          | 4730                          | 890   | 1778 | 2 | 0.0134 | 7.529 |
| Alpha-2-HS-glycoprotein<br>OS=Bos taurus<br>GN=AHSG PE=1<br>SV=2 | sp P12763 FETUA_BOVIN, tr B0JYN6 B0JYN6_BOVIN | tPIV<br>GQP<br>SIPG<br>GPV<br>R | 95% | 49.4 | 52.22456 | Ref | 0.55                   | 0.4                      | 0.45                          | 0.41                          | 0.09                    | 0.86                          | 0.19                          | 4000                     | 5270                   | 5170                     | 6000                          | 6430                          | 4490                    | 8000                          | 4990                          | 890   | 1778 | 2 | 0.0133 | 7.462 |

|                                                                  |                                               |                                 |     |      |          |     |       |       |       |       |       |       |       |       |       |       |       |        |       |       |       |       |        |   |        |       |
|------------------------------------------------------------------|-----------------------------------------------|---------------------------------|-----|------|----------|-----|-------|-------|-------|-------|-------|-------|-------|-------|-------|-------|-------|--------|-------|-------|-------|-------|--------|---|--------|-------|
| Alpha-2-HS-glycoprotein<br>OS=Bos taurus<br>GN=AHSG PE=1<br>SV=2 | sp P12763 FETUA_BOVIN, tr B0JYN6 B0JYN6_BOVIN | tPIV<br>GQP<br>SIPG<br>GPV<br>R | 85% | 39.2 | 52.1218  | Ref | 0.39  | 0.39  | 0.46  | 0.47  | 0.047 | 0.83  | 0.4   | 938   | 1110  | 1210  | 1420  | 1580   | 1030  | 1850  | 1360  | 890   | 1778   | 2 | 0.0111 | 6.225 |
| Alpha-2-HS-glycoprotein<br>OS=Bos taurus<br>GN=AHSG PE=1<br>SV=2 | sp P12763 FETUA_BOVIN, tr B0JYN6 B0JYN6_BOVIN | tPIV<br>GQP<br>SIPG<br>GPV<br>R | 81% | 37.9 | 52.18105 | Ref | 0.16  | 0.22  | 0.48  | 0.68  | -0.34 | 1.1   | 0.31  | 247   | 246   | 276   | 372   | 470    | 203   | 585   | 331   | 890   | 1778   | 2 | 0.0089 | 5     |
| Alpha-2-HS-glycoprotein<br>OS=Bos taurus<br>GN=AHSG PE=1<br>SV=2 | sp P12763 FETUA_BOVIN, tr B0JYN6 B0JYN6_BOVIN | tPIV<br>GQP<br>SIPG<br>GPV<br>R | 82% | 38   | 52.12505 | Ref | 0.4   | 0.34  | 0.73  | 0.31  | 0.06  | 0.78  | 0.25  | 215   | 236   | 246   | 360   | 299    | 219   | 375   | 259   | 890   | 1778   | 2 | 0.0105 | 5.888 |
| Vimentin (Fragment) OS=Ovis aries PE=2 SV=1                      | tr A4ZYA6 A4ZYA6_SHEEP                        | dNLA<br>EDI<br>MR               | 72% | 33.5 | 50.3841  | Ref | -0.26 | -0    | -0.96 | -0.42 | -1    | -0.23 | -1.1  | 2E+05 | 99700 | 1E+05 | 74800 | 119000 | 69800 | 1E+05 | 69000 | 690.9 | 1379.7 | 2 | 0.0157 | 11.38 |
| Vimentin (Fragment) OS=Ovis aries PE=2 SV=1                      | tr A4ZYA6 A4ZYA6_SHEEP                        | dNLA<br>EDI<br>MR               | 72% | 33.7 | 50.5214  | Ref | -0.28 | -0.03 | -0.82 | -0.42 | -0.86 | -0.27 | -0.97 | 67600 | 45000 | 58200 | 37700 | 54800  | 35300 | 55300 | 33900 | 690.9 | 1379.7 | 2 | 0.0108 | 7.847 |
| Vimentin (Fragment) OS=Ovis aries PE=2 SV=1                      | tr A4ZYA6 A4ZYA6_SHEEP                        | dNLA<br>EDI<br>MR               | 70% | 33.4 | 50.6405  | Ref | -0.31 | 0.006 | -0.92 | -0.4  | -0.81 | -0.27 | -1    | 1E+05 | 69700 | 93900 | 55300 | 87800  | 57400 | 87500 | 50800 | 690.9 | 1379.7 | 2 | 0.0086 | 6.254 |

|                                                   |                                |                            |     |      |          |     |        |       |       |       |       |       |       |       |        |       |        |        |       |       |        |       |        |   |        |       |
|---------------------------------------------------|--------------------------------|----------------------------|-----|------|----------|-----|--------|-------|-------|-------|-------|-------|-------|-------|--------|-------|--------|--------|-------|-------|--------|-------|--------|---|--------|-------|
| Vimentin<br>(Fragment) OS=Ovis<br>aries PE=2 SV=1 | tr A4ZYA<br>6 A4ZYA6<br>_SHEEP | dNLA<br>EDI<br>MR          | 53% | 30.5 | 50.62285 | Ref | -0.33  | -0.27 | -0.66 | -0.49 | -0.6  | -0.29 | -0.42 | 6860  | 5300   | 6000  | 5140   | 6390   | 5150  | 6690  | 6030   | 460.9 | 1379.7 | 3 | 0.0085 | 6.12  |
| Vimentin<br>(Fragment) OS=Ovis<br>aries PE=2 SV=1 | tr A4ZYA<br>6 A4ZYA6<br>_SHEEP | eEAE<br>STLQ<br>SFR        | 94% | 44.9 | 51.12048 | Ref | -0.3   | 0.15  | -1.2  | -0.43 | -1.1  | -0.1  | -1.2  | 3E+05 | 159000 | 2E+05 | 103000 | 195000 | 1E+05 | 2E+05 | 104000 | 800.9 | 1599.8 | 2 | 0.0126 | 7.841 |
| Vimentin<br>(Fragment) OS=Ovis<br>aries PE=2 SV=1 | tr A4ZYA<br>6 A4ZYA6<br>_SHEEP | eEAE<br>STLQ<br>SFR        | 90% | 40.9 | 51.12263 | Ref | -0.58  | 0.029 | -0.98 | -0.16 | -1.1  | -0.2  | -1.2  | 82400 | 39800  | 65900 | 36700  | 71700  | 33700 | 63600 | 32000  | 800.9 | 1599.8 | 2 | 0.0121 | 7.528 |
| Vimentin<br>(Fragment) OS=Ovis<br>aries PE=2 SV=1 | tr A4ZYA<br>6 A4ZYA6<br>_SHEEP | eEAE<br>STLQ<br>SFR        | 95% | 55   | 51.13432 | Ref | -0.38  | -0.26 | -0.4  | -0.64 | -0.68 | -0.31 | -0.73 | 45000 | 28300  | 33400 | 34200  | 31700  | 27100 | 36300 | 26900  | 534.3 | 1599.8 | 3 | 0.0116 | 7.232 |
| Vimentin<br>(Fragment) OS=Ovis<br>aries PE=2 SV=1 | tr A4ZYA<br>6 A4ZYA6<br>_SHEEP | eTNL<br>DSL<br>LVDT<br>HSK | 95% | 52.3 | 54.52961 | Ref | -0.066 | -0.22 | -1    | -0.37 | -0.45 | -0.22 | -0.91 | 9890  | 9230   | 9010  | 5790   | 10100  | 8290  | 10200 | 6240   | 570.1 | 2276.2 | 4 | 0.028  | 12.28 |
| Vimentin<br>(Fragment) OS=Ovis<br>aries PE=2 SV=1 | tr A4ZYA<br>6 A4ZYA6<br>_SHEEP | eTNL<br>DSL<br>LVDT<br>HSK | 93% | 50.4 | 54.54472 | Ref | -0.062 | -0.04 | -0.79 | -0.44 | -0.97 | -0.07 | -0.91 | 13600 | 13300  | 14600 | 9710   | 13700  | 8250  | 16100 | 8940   | 759.7 | 2276.2 | 3 | 0.0248 | 10.88 |

|                                                   |                                |                         |     |      |          |     |       |       |       |       |       |       |       |       |       |       |       |       |       |       |       |       |        |   |        |       |
|---------------------------------------------------|--------------------------------|-------------------------|-----|------|----------|-----|-------|-------|-------|-------|-------|-------|-------|-------|-------|-------|-------|-------|-------|-------|-------|-------|--------|---|--------|-------|
| Vimentin<br>(Fragment) OS=Ovis<br>aries PE=2 SV=1 | tr A4ZYA<br>6 A4ZYA6<br>_SHEEP | eTNL<br>DSLPLVDT<br>HSK | 89% | 45.5 | 54.48412 | Ref | -0.24 | -0.09 | -0.8  | -0.36 | -0.84 | -0.06 | -0.89 | 14000 | 11500 | 13900 | 9500  | 14200 | 8920  | 15900 | 8910  | 759.7 | 2276.2 | 3 | 0.0209 | 9.19  |
| Vimentin<br>(Fragment) OS=Ovis<br>aries PE=2 SV=1 | tr A4ZYA<br>6 A4ZYA6<br>_SHEEP | eTNL<br>DSLPLVDT<br>HSK | 91% | 47.9 | 54.45655 | Ref | -0.25 | -0.25 | -0.94 | -0.47 | -0.63 | -0.19 | -0.62 | 9570  | 7030  | 7590  | 5300  | 8060  | 6310  | 8910  | 6590  | 759.7 | 2276.2 | 3 | 0.0198 | 8.703 |
| Vimentin<br>(Fragment) OS=Ovis<br>aries PE=2 SV=1 | tr A4ZYA<br>6 A4ZYA6<br>_SHEEP | eTNL<br>DSLPLVDT<br>HSK | 95% | 59.3 | 54.45718 | Ref | -0.59 | -0.19 | -1    | -0.28 | -0.81 | 0.13  | -0.93 | 13900 | 7720  | 11100 | 6990  | 12900 | 7780  | 15600 | 7420  | 759.7 | 2276.2 | 3 | 0.0196 | 8.624 |
| Vimentin<br>(Fragment) OS=Ovis<br>aries PE=2 SV=1 | tr A4ZYA<br>6 A4ZYA6<br>_SHEEP | eTNL<br>DSLPLVDT<br>HSK | 95% | 60.2 | 54.46396 | Ref | -0.41 | -0.02 | -1    | -0.29 | -0.88 | -0.06 | -1.2  | 99100 | 57600 | 82300 | 45300 | 84000 | 48800 | 90300 | 39500 | 759.8 | 2276.2 | 3 | 0.0193 | 8.466 |
| Vimentin<br>(Fragment) OS=Ovis<br>aries PE=2 SV=1 | tr A4ZYA<br>6 A4ZYA6<br>_SHEEP | eTNL<br>DSLPLVDT<br>HSK | 90% | 46.2 | 54.4377  | Ref | -0.52 | -0.21 | -0.67 | -0.32 | -0.56 | -0.22 | -0.81 | 14500 | 8740  | 11700 | 9580  | 13400 | 9950  | 13100 | 8660  | 759.8 | 2276.2 | 3 | 0.0183 | 8.057 |
| Vimentin<br>(Fragment) OS=Ovis<br>aries PE=2 SV=1 | tr A4ZYA<br>6 A4ZYA6<br>_SHEEP | eTNL<br>DSLPLVDT<br>HSK | 95% | 59.6 | 54.43298 | Ref | -0.27 | -0.28 | -0.89 | -0.39 | -0.77 | -0.17 | -0.88 | 19900 | 12800 | 13800 | 10200 | 15900 | 10600 | 16800 | 10200 | 759.8 | 2276.2 | 3 | 0.018  | 7.899 |

|                                                   |                                |                                  |     |      |          |     |       |       |       |       |       |       |       |       |        |       |        |        |       |       |        |       |        |   |        |       |
|---------------------------------------------------|--------------------------------|----------------------------------|-----|------|----------|-----|-------|-------|-------|-------|-------|-------|-------|-------|--------|-------|--------|--------|-------|-------|--------|-------|--------|---|--------|-------|
| Vimentin<br>(Fragment) OS=Ovis<br>aries PE=2 SV=1 | tr A4ZYA<br>6 A4ZYA6<br>_SHEEP | eTNL<br>DSL<br>LP<br>LVDT<br>HSK | 93% | 47.6 | 54.43013 | Ref | -0.21 | -0.24 | -1    | -0.34 | -0.9  | -0.05 | -0.54 | 3890  | 3210   | 3400  | 2250   | 3930   | 2330  | 4380  | 3100   | 570.1 | 2276.2 | 4 | 0.0175 | 7.665 |
| Vimentin<br>(Fragment) OS=Ovis<br>aries PE=2 SV=1 | tr A4ZYA<br>6 A4ZYA6<br>_SHEEP | eTNL<br>DSL<br>LP<br>LVDT<br>HSK | 95% | 55.2 | 54.43366 | Ref | -0.5  | -0.07 | -1.2  | -0.27 | -0.91 | 0.051 | -1.2  | 3E+05 | 162000 | 2E+05 | 118000 | 253000 | 1E+05 | 3E+05 | 122000 | 759.8 | 2276.2 | 3 | 0.0167 | 7.333 |
| Vimentin<br>(Fragment) OS=Ovis<br>aries PE=2 SV=1 | tr A4ZYA<br>6 A4ZYA6<br>_SHEEP | eTNL<br>DSL<br>LP<br>LVDT<br>HSK | 95% | 59.6 | 54.43366 | Ref | -0.38 | -0.34 | -0.97 | -0.22 | -0.72 | -0.15 | -0.71 | 13200 | 8460   | 9390  | 6820   | 12600  | 7790  | 12100 | 8140   | 759.8 | 2276.2 | 3 | 0.0167 | 7.333 |
| Vimentin<br>(Fragment) OS=Ovis<br>aries PE=2 SV=1 | tr A4ZYA<br>6 A4ZYA6<br>_SHEEP | eTNL<br>DSL<br>LP<br>LVDT<br>HSK | 95% | 59.7 | 54.43375 | Ref | -0.4  | -0.09 | -0.88 | -0.35 | -0.89 | 0.011 | -0.87 | 7330  | 4970   | 6680  | 4340   | 6890   | 4130  | 8070  | 4350   | 759.8 | 2276.2 | 3 | 0.0165 | 7.254 |
| Vimentin<br>(Fragment) OS=Ovis<br>aries PE=2 SV=1 | tr A4ZYA<br>6 A4ZYA6<br>_SHEEP | eTNL<br>DSL<br>LP<br>LVDT<br>HSK | 95% | 50.2 | 54.40609 | Ref | -0.35 | -0.44 | -0.82 | -0.19 | -0.94 | -0.15 | -0.73 | 13000 | 8030   | 8220  | 7060   | 12000  | 6280  | 11300 | 7520   | 570.1 | 2276.2 | 4 | 0.0163 | 7.138 |
| Vimentin<br>(Fragment) OS=Ovis<br>aries PE=2 SV=1 | tr A4ZYA<br>6 A4ZYA6<br>_SHEEP | eTNL<br>DSL<br>LP<br>LVDT<br>HSK | 91% | 45.3 | 54.39604 | Ref | -0.11 | -0.36 | -0.89 | -0.47 | -0.9  | -0.02 | -0.93 | 45100 | 33700  | 30600 | 23800  | 35200  | 22800 | 43700 | 23200  | 570.1 | 2276.2 | 4 | 0.016  | 7.015 |



|                                                   |                                |                         |     |      |          |     |       |       |       |       |       |       |       |       |       |       |      |       |      |       |       |       |        |   |        |       |
|---------------------------------------------------|--------------------------------|-------------------------|-----|------|----------|-----|-------|-------|-------|-------|-------|-------|-------|-------|-------|-------|------|-------|------|-------|-------|-------|--------|---|--------|-------|
| Vimentin<br>(Fragment) OS=Ovis<br>aries PE=2 SV=1 | tr A4ZYA<br>6 A4ZYA6<br>_SHEEP | eTNL<br>DSLPLVDT<br>HSK | 78% | 39.9 | 54.39545 | Ref | -0.24 | -0.22 | -0.84 | -0.27 | -0.9  | -0.34 | -0.29 | 12700 | 10800 | 11900 | 8690 | 14200 | 8030 | 12400 | 12700 | 759.8 | 2276.2 | 3 | 0.0156 | 6.859 |
| Vimentin<br>(Fragment) OS=Ovis<br>aries PE=2 SV=1 | tr A4ZYA<br>6 A4ZYA6<br>_SHEEP | eTNL<br>DSLPLVDT<br>HSK | 74% | 36.7 | 54.39246 | Ref | -0.41 | -0.19 | -0.82 | -0.14 | -0.77 | -0.32 | -0.79 | 7660  | 4870  | 6180  | 4480 | 7920  | 4470 | 6380  | 4550  | 570.1 | 2276.2 | 4 | 0.0143 | 6.277 |
| Vimentin<br>(Fragment) OS=Ovis<br>aries PE=2 SV=1 | tr A4ZYA<br>6 A4ZYA6<br>_SHEEP | eTNL<br>DSLPLVDT<br>HSK | 95% | 63.5 | 54.40098 | Ref | -0.32 | -0.21 | -1.1  | -0.32 | -0.59 | -0.09 | -0.83 | 6640  | 4620  | 5400  | 3280 | 6190  | 4480 | 6660  | 3940  | 759.8 | 2276.2 | 3 | 0.013  | 5.726 |
| Vimentin<br>(Fragment) OS=Ovis<br>aries PE=2 SV=1 | tr A4ZYA<br>6 A4ZYA6<br>_SHEEP | eTNL<br>DSLPLVDT<br>HSK | 95% | 57.5 | 54.35376 | Ref | -0.57 | -0.01 | -1.1  | -0.3  | -0.86 | -0.08 | -0.95 | 18500 | 9530  | 15300 | 8130 | 15500 | 9180 | 16400 | 8920  | 759.8 | 2276.2 | 3 | 0.0127 | 5.567 |
| Vimentin<br>(Fragment) OS=Ovis<br>aries PE=2 SV=1 | tr A4ZYA<br>6 A4ZYA6<br>_SHEEP | eTNL<br>DSLPLVDT<br>HSK | 89% | 45.7 | 54.27036 | Ref | -0.28 | -0.29 | -0.83 | -0.4  | -0.65 | -0.23 | -0.65 | 7590  | 5380  | 5770  | 4480 | 6620  | 4870 | 6820  | 5040  | 759.8 | 2276.2 | 3 | 0.0079 | 3.473 |
| Vimentin<br>(Fragment) OS=Ovis<br>aries PE=2 SV=1 | tr A4ZYA<br>6 A4ZYA6<br>_SHEEP | eTNL<br>DSLPLVDT<br>HSK | 95% | 57.7 | 54.23169 | Ref | -0.31 | -0.39 | -0.79 | -0.45 | -0.58 | -0.13 | -0.39 | 4160  | 3350  | 3430  | 2920 | 4070  | 3260 | 4630  | 3860  | 570.1 | 2276.2 | 4 | 0.0057 | 2.518 |

|                                                   |                                |                                   |     |      |          |     |       |       |       |       |       |       |       |       |       |       |       |       |       |       |       |       |        |   |        |       |
|---------------------------------------------------|--------------------------------|-----------------------------------|-----|------|----------|-----|-------|-------|-------|-------|-------|-------|-------|-------|-------|-------|-------|-------|-------|-------|-------|-------|--------|---|--------|-------|
| Vimentin<br>(Fragment) OS=Ovis<br>aries PE=2 SV=1 | tr A4ZYA<br>6 A4ZYA6<br>_SHEEP | eTNL<br>DSL<br>LP<br>LVDT<br>Hsk  | 95% | 62.6 | 54.27145 | Ref | -0.59 | 0.018 | -1.2  | -0.19 | -1    | 0.012 | -1.2  | 5690  | 2800  | 4640  | 2190  | 4970  | 2430  | 5220  | 2300  | 1139  | 2276.2 | 2 | 0.0053 | 2.346 |
| Vimentin<br>(Fragment) OS=Ovis<br>aries PE=2 SV=1 | tr A4ZYA<br>6 A4ZYA6<br>_SHEEP | eTNL<br>DSL<br>LP<br>LVDT<br>Hsk  | 64% | 36   | 54.48148 | Ref | -0.54 | -0.08 | -1.3  | -0.19 | -1.1  | 0.12  | -0.87 | 1610  | 869   | 1300  | 614   | 1490  | 672   | 1690  | 842   | 1139  | 2276.2 | 2 | 0.0234 | 10.29 |
| Vimentin<br>(Fragment) OS=Ovis<br>aries PE=2 SV=1 | tr A4ZYA<br>6 A4ZYA6<br>_SHEEP | eTNL<br>DSL<br>LP<br>LVDT<br>Hsk  | 95% | 63.4 | 54.39663 | Ref | -0.43 | -0.16 | -0.99 | -0.22 | -0.82 | 0.017 | -0.91 | 26400 | 17300 | 22600 | 14200 | 26800 | 15500 | 28800 | 15100 | 759.8 | 2276.2 | 3 | 0.0141 | 6.213 |
| Vimentin<br>(Fragment) OS=Ovis<br>aries PE=2 SV=1 | tr A4ZYA<br>6 A4ZYA6<br>_SHEEP | eTNL<br>DSL<br>LP<br>LVDT<br>Hsk  | 95% | 61.5 | 54.35376 | Ref | -0.48 | -0.24 | -0.75 | -0.28 | -0.7  | 0.007 | -0.77 | 6890  | 4710  | 6010  | 4750  | 7230  | 4720  | 8070  | 4660  | 759.8 | 2276.2 | 3 | 0.0127 | 5.567 |
| Vimentin<br>(Fragment) OS=Ovis<br>aries PE=2 SV=1 | tr A4ZYA<br>6 A4ZYA6<br>_SHEEP | eTnL<br>DSL<br>LP<br>LVDT<br>Hsk  | 93% | 50.7 | 54.54487 | Ref | -0.32 | -0.24 | -0.65 | -0.47 | -0.78 | -0.19 | -0.55 | 12500 | 9230  | 10600 | 8960  | 11100 | 7830  | 12300 | 9560  | 760.1 | 2277.2 | 3 | 0.0316 | 13.88 |
| Vimentin<br>(Fragment) OS=Ovis<br>aries PE=2 SV=1 | tr A4ZYA<br>6 A4ZYA6<br>_SHEEP | eTNL<br>DSL<br>LP<br>LVDT<br>HskR | 58% | 33.3 | 54.5118  | Ref | -0.51 | -0.37 | -0.93 | 0.028 | -0.57 | 0.053 | -0.62 | 18300 | 15800 | 18900 | 14400 | 30700 | 17700 | 28500 | 17800 | 609.1 | 2432.3 | 4 | 0.0223 | 9.176 |

|                                                   |                                |                   |     |      |          |     |       |       |       |       |       |       |       |       |        |       |        |        |       |       |        |       |      |   |        |       |
|---------------------------------------------------|--------------------------------|-------------------|-----|------|----------|-----|-------|-------|-------|-------|-------|-------|-------|-------|--------|-------|--------|--------|-------|-------|--------|-------|------|---|--------|-------|
| Vimentin<br>(Fragment) OS=Ovis<br>aries PE=2 SV=1 | tr A4ZYA<br>6 A4ZYA6<br>_SHEEP | eYQ<br>DLLN<br>Vk | 95% | 52.6 | 52.87851 | Ref | -0.45 | -0.08 | -1.3  | -0.23 | -0.9  | -0.06 | -0.89 | 1E+05 | 71700  | 1E+05 | 47800  | 112000 | 61500 | 1E+05 | 64200  | 577.3 | 1729 | 3 | 0.0178 | 10.27 |
| Vimentin<br>(Fragment) OS=Ovis<br>aries PE=2 SV=1 | tr A4ZYA<br>6 A4ZYA6<br>_SHEEP | eYQ<br>DLLN<br>Vk | 95% | 60.5 | 52.87271 | Ref | -0.54 | 0.013 | -1    | -0.21 | -0.88 | -0.15 | -0.93 | 1E+05 | 62000  | 98400 | 53200  | 104000 | 57200 | 99400 | 57400  | 865.5 | 1729 | 2 | 0.0164 | 9.507 |
| Vimentin<br>(Fragment) OS=Ovis<br>aries PE=2 SV=1 | tr A4ZYA<br>6 A4ZYA6<br>_SHEEP | eYQ<br>DLLN<br>Vk | 71% | 36.5 | 52.88964 | Ref | -0.67 | -0.08 | -1.1  | -0.11 | -0.67 | -0.04 | -0.81 | 44700 | 25900  | 42300 | 24000  | 51400  | 30400 | 49100 | 28600  | 577.3 | 1729 | 3 | 0.0152 | 8.776 |
| Vimentin<br>(Fragment) OS=Ovis<br>aries PE=2 SV=1 | tr A4ZYA<br>6 A4ZYA6<br>_SHEEP | eYQ<br>DLLN<br>Vk | 79% | 38.8 | 52.88964 | Ref | -0.48 | -0.03 | -1.1  | -0.13 | -0.78 | -0.18 | -1.1  | 3E+05 | 192000 | 3E+05 | 156000 | 331000 | 2E+05 | 3E+05 | 152000 | 577.3 | 1729 | 3 | 0.0152 | 8.776 |
| Vimentin<br>(Fragment) OS=Ovis<br>aries PE=2 SV=1 | tr A4ZYA<br>6 A4ZYA6<br>_SHEEP | eYQ<br>DLLN<br>Vk | 95% | 64   | 52.81265 | Ref | -0.56 | -0.09 | -0.97 | -0.12 | -0.94 | -0.01 | -0.98 | 34800 | 19900  | 29900 | 18300  | 36400  | 18000 | 35600 | 18100  | 865.5 | 1729 | 2 | 0.0135 | 7.819 |
| Vimentin<br>(Fragment) OS=Ovis<br>aries PE=2 SV=1 | tr A4ZYA<br>6 A4ZYA6<br>_SHEEP | eYQ<br>DLLN<br>Vk | 95% | 63.5 | 52.93533 | Ref | -0.45 | -0.17 | -0.95 | -0.26 | -0.84 | 0.065 | -0.93 | 10700 | 6920   | 9120  | 5960   | 10600  | 6180  | 12100 | 6020   | 865.5 | 1729 | 2 | 0.0189 | 10.92 |

|                                                   |                                |                    |     |      |          |     |       |       |       |       |       |       |       |       |        |       |        |        |       |       |        |       |        |   |        |       |
|---------------------------------------------------|--------------------------------|--------------------|-----|------|----------|-----|-------|-------|-------|-------|-------|-------|-------|-------|--------|-------|--------|--------|-------|-------|--------|-------|--------|---|--------|-------|
| Vimentin<br>(Fragment) OS=Ovis<br>aries PE=2 SV=1 | tr A4ZYA<br>6 A4ZYA6<br>_SHEEP | eYQ<br>DLLN<br>Vk  | 95% | 52.4 | 52.89317 | Ref | -0.37 | -0.08 | -0.8  | -0.36 | -0.89 | -0.08 | -0.93 | 33500 | 22400  | 29800 | 20200  | 30300  | 18300 | 33600 | 18400  | 577.3 | 1729   | 3 | 0.0168 | 9.73  |
| Vimentin<br>(Fragment) OS=Ovis<br>aries PE=2 SV=1 | tr A4ZYA<br>6 A4ZYA6<br>_SHEEP | fADL<br>SEAA<br>NR | 94% | 44.9 | 51.06316 | Ref | -0.38 | -0.07 | -0.93 | -0.34 | -0.87 | -0    | -0.98 | 4E+05 | 276000 | 4E+05 | 230000 | 382000 | 2E+05 | 4E+05 | 222000 | 699.4 | 1396.7 | 2 | 0.0116 | 8.273 |
| Vimentin<br>(Fragment) OS=Ovis<br>aries PE=2 SV=1 | tr A4ZYA<br>6 A4ZYA6<br>_SHEEP | gTNE<br>SLER       | 94% | 48.1 | 50.07863 | Ref | -0.38 | -0.15 | -0.37 | -0.54 | -0.38 | -0.44 | -0.65 | 19500 | 16000  | 20300 | 19600  | 19100  | 18700 | 18800 | 16100  | 403.9 | 1208.6 | 3 | 0.0082 | 6.796 |
| Vimentin<br>(Fragment) OS=Ovis<br>aries PE=2 SV=1 | tr A4ZYA<br>6 A4ZYA6<br>_SHEEP | iLLAE<br>LEQL<br>k | 95% | 51.5 | 49.08775 | Ref | -0.26 | -0    | -1.1  | -0.3  | -1    | -0.13 | -1    | 22200 | 15100  | 19600 | 10500  | 19800  | 10500 | 20300 | 11000  | 593.4 | 1777.1 | 3 | 0.0306 | 17.19 |
| Vimentin<br>(Fragment) OS=Ovis<br>aries PE=2 SV=1 | tr A4ZYA<br>6 A4ZYA6<br>_SHEEP | iLLAE<br>LEQL<br>k | 89% | 40.6 | 48.9805  | Ref | -0.42 | 0.34  | -1.2  | -0.39 | -1.1  | -0.32 | -0.59 | 1390  | 944    | 1730  | 660    | 1290   | 676   | 1240  | 1020   | 593.4 | 1777.1 | 3 | 0.0258 | 14.51 |
| Vimentin<br>(Fragment) OS=Ovis<br>aries PE=2 SV=1 | tr A4ZYA<br>6 A4ZYA6<br>_SHEEP | iLLAE<br>LEQL<br>k | 95% | 45.9 | 48.77849 | Ref | -0.38 | 0.066 | -1.2  | -0.25 | -1.1  | -0.1  | -1.1  | 6870  | 3980   | 5900  | 2680   | 5850   | 2810  | 5940  | 3000   | 889.6 | 1777.1 | 2 | 0.0204 | 11.45 |

|                                                   |                                |                    |     |      |          |     |        |       |       |       |       |       |       |       |       |       |       |       |       |       |       |       |        |   |        |       |
|---------------------------------------------------|--------------------------------|--------------------|-----|------|----------|-----|--------|-------|-------|-------|-------|-------|-------|-------|-------|-------|-------|-------|-------|-------|-------|-------|--------|---|--------|-------|
| Vimentin<br>(Fragment) OS=Ovis<br>aries PE=2 SV=1 | tr A4ZYA<br>6 A4ZYA6<br>_SHEEP | iLLAE<br>LEQL<br>k | 95% | 47   | 48.07549 | Ref | -0.36  | -0.21 | -0.79 | -0.39 | -0.76 | -0.18 | -0.71 | 29000 | 19200 | 23100 | 17400 | 25300 | 17000 | 26500 | 18300 | 593.4 | 1777.1 | 3 | 0.0124 | 6.998 |
| Vimentin<br>(Fragment) OS=Ovis<br>aries PE=2 SV=1 | tr A4ZYA<br>6 A4ZYA6<br>_SHEEP | iLLAE<br>LEQL<br>k | 95% | 51.2 | 47.95943 | Ref | -0.49  | 0.019 | -1.1  | -0.19 | -1.1  | -0.11 | -1.1  | 2270  | 1190  | 1840  | 926   | 1970  | 900   | 1900  | 974   | 889.6 | 1777.1 | 2 | 0.0104 | 5.825 |
| Vimentin<br>(Fragment) OS=Ovis<br>aries PE=2 SV=1 | tr A4ZYA<br>6 A4ZYA6<br>_SHEEP | iLLAE<br>LEQL<br>k | 69% | 30.9 | 47.8651  | Ref | -0.21  | -0.22 | -0.32 | -0.29 | -0.93 | -0.38 | -1.1  | 470   | 354   | 383   | 400   | 451   | 253   | 387   | 232   | 593.4 | 1777.1 | 3 | 0.0097 | 5.446 |
| Vimentin<br>(Fragment) OS=Ovis<br>aries PE=2 SV=1 | tr A4ZYA<br>6 A4ZYA6<br>_SHEEP | iLLAE<br>LEQL<br>k | 90% | 40.6 | 48.62585 | Ref | -0.27  | -0.02 | -1.2  | -0.41 | -0.96 | -0.08 | -1.1  | 2250  | 1410  | 1810  | 926   | 1710  | 1020  | 1960  | 948   | 593.4 | 1777.1 | 3 | 0.0192 | 10.81 |
| Vimentin<br>(Fragment) OS=Ovis<br>aries PE=2 SV=1 | tr A4ZYA<br>6 A4ZYA6<br>_SHEEP | iLLAE<br>LEQL<br>k | 75% | 32.4 | 47.95943 | Ref | -0.027 | -0.7  | -0.97 | -0.48 | -0.62 | -0.51 | -0.59 | 522   | 357   | 242   | 226   | 350   | 278   | 313   | 294   | 593.4 | 1777.1 | 3 | 0.0106 | 5.969 |
| Vimentin<br>(Fragment) OS=Ovis<br>aries PE=2 SV=1 | tr A4ZYA<br>6 A4ZYA6<br>_SHEEP | iLLAE<br>LEQL<br>k | 91% | 40.8 | 47.46378 | Ref | -0.45  | -0.16 | -0.96 | -0.26 | -1.1  | -0.04 | -0.95 | 3540  | 1960  | 2600  | 1680  | 2990  | 1490  | 3180  | 1670  | 593.4 | 1777.1 | 3 | 0.006  | 3.388 |

|                                                   |                                |                            |     |      |          |     |       |       |       |        |       |       |       |      |      |      |      |      |      |      |      |       |        |   |        |       |
|---------------------------------------------------|--------------------------------|----------------------------|-----|------|----------|-----|-------|-------|-------|--------|-------|-------|-------|------|------|------|------|------|------|------|------|-------|--------|---|--------|-------|
| Vimentin<br>(Fragment) OS=Ovis<br>aries PE=2 SV=1 | tr A4ZYA<br>6 A4ZYA6<br>_SHEEP | iLLAE<br>LEQL<br>k         | 89% | 37   | 47.38361 | Ref | -0.24 | -0.22 | -0.98 | -0.18  | -1.1  | 0.15  | -1.4  | 789  | 555  | 609  | 403  | 775  | 350  | 889  | 300  | 889.6 | 1777.1 | 2 | 0.0036 | 2.046 |
| Vimentin<br>(Fragment) OS=Ovis<br>aries PE=2 SV=1 | tr A4ZYA<br>6 A4ZYA6<br>_SHEEP | iLLAE<br>LEQL<br>k         | 92% | 41.5 | 47.42049 | Ref | -0.4  | -0.09 | -0.54 | -0.57  | -0.9  | -0.31 | -0.6  | 562  | 357  | 482  | 395  | 425  | 296  | 465  | 379  | 593.4 | 1777.1 | 3 | 0.0025 | 1.431 |
| Vimentin<br>(Fragment) OS=Ovis<br>aries PE=2 SV=1 | tr A4ZYA<br>6 A4ZYA6<br>_SHEEP | iLLAE<br>LEQL<br>k         | 86% | 36.6 | 47.46369 | Ref | -0.46 | -0.13 | -1    | -0.26  | -0.71 | -0.3  | -0.99 | 508  | 268  | 368  | 226  | 414  | 266  | 367  | 227  | 593.4 | 1777.1 | 3 | 0.0053 | 2.983 |
| Vimentin<br>(Fragment) OS=Ovis<br>aries PE=2 SV=1 | tr A4ZYA<br>6 A4ZYA6<br>_SHEEP | iLLAE<br>LEQL<br>kGQ<br>Gk | 95% | 52   | 47.88366 | Ref | -0.82 | -0.27 | -1    | 0.041  | -0.63 | 0.077 | -0.4  | 1980 | 1350 | 2140 | 1420 | 3290 | 1800 | 3070 | 2190 | 613.9 | 2451.5 | 4 | 0.0326 | 13.29 |
| Vimentin<br>(Fragment) OS=Ovis<br>aries PE=2 SV=1 | tr A4ZYA<br>6 A4ZYA6<br>_SHEEP | iLLAE<br>LEQL<br>kGQ<br>Gk | 95% | 52.1 | 47.70322 | Ref | -1    | -0.31 | -0.85 | -0.018 | -0.73 | 0.26  | -0.57 | 4440 | 2430 | 4320 | 3340 | 6560 | 3510 | 7270 | 4040 | 613.9 | 2451.5 | 4 | 0.0279 | 11.4  |
| Vimentin<br>(Fragment) OS=Ovis<br>aries PE=2 SV=1 | tr A4ZYA<br>6 A4ZYA6<br>_SHEEP | iLLAE<br>LEQL<br>kGQ<br>Gk | 60% | 27.5 | 46.53309 | Ref | -0.94 | -0.21 | -1    | 3E-04  | -0.67 | 0.22  | -0.41 | 1430 | 973  | 1750 | 1130 | 2510 | 1370 | 2660 | 1710 | 818.2 | 2451.5 | 3 | 0.0141 | 5.746 |

|                                                   |                                |                            |     |      |          |     |       |       |       |       |       |       |       |       |       |       |       |       |       |       |       |       |        |   |        |       |
|---------------------------------------------------|--------------------------------|----------------------------|-----|------|----------|-----|-------|-------|-------|-------|-------|-------|-------|-------|-------|-------|-------|-------|-------|-------|-------|-------|--------|---|--------|-------|
| Vimentin<br>(Fragment) OS=Ovis<br>aries PE=2 SV=1 | tr A4ZYA<br>6 A4ZYA6<br>_SHEEP | iSLPL<br>PNFS<br>SLNL<br>R | 83% | 38.6 | 52.03019 | Ref | -0.34 | -0.11 | -1.1  | -0.26 | -0.94 | -0.03 | -0.89 | 25500 | 17200 | 21800 | 12800 | 24400 | 13200 | 26100 | 14200 | 938.1 | 1874.1 | 2 | #####  | 0.44  |
| Vimentin<br>(Fragment) OS=Ovis<br>aries PE=2 SV=1 | tr A4ZYA<br>6 A4ZYA6<br>_SHEEP | kVES<br>LQEE<br>IAFL<br>k  | 80% | 35.2 | 50.85922 | Ref | -0.61 | -0.07 | -0.8  | -0.33 | -0.83 | -0.14 | -0.58 | 33700 | 19700 | 31000 | 21000 | 32100 | 19900 | 33400 | 24500 | 612.4 | 2445.4 | 4 | 0.0253 | 10.33 |
| Vimentin<br>(Fragment) OS=Ovis<br>aries PE=2 SV=1 | tr A4ZYA<br>6 A4ZYA6<br>_SHEEP | kVES<br>LQEE<br>IAFL<br>k  | 92% | 44.8 | 50.66404 | Ref | -0.45 | -0.05 | -0.84 | -0.35 | -0.84 | -0.08 | -0.99 | 1650  | 1000  | 1430  | 928   | 1440  | 892   | 1580  | 836   | 816.2 | 2445.4 | 3 | 0.0211 | 8.629 |
| Vimentin<br>(Fragment) OS=Ovis<br>aries PE=2 SV=1 | tr A4ZYA<br>6 A4ZYA6<br>_SHEEP | kVES<br>LQEE<br>IAFL<br>k  | 95% | 52.1 | 50.47104 | Ref | -0.59 | -0.21 | -1.1  | -0.24 | -0.93 | -0.08 | -0.41 | 7340  | 4110  | 5810  | 3450  | 7030  | 3790  | 7130  | 5640  | 612.4 | 2445.4 | 4 | 0.0172 | 7.03  |
| Vimentin<br>(Fragment) OS=Ovis<br>aries PE=2 SV=1 | tr A4ZYA<br>6 A4ZYA6<br>_SHEEP | kVES<br>LQEE<br>IAFL<br>k  | 95% | 55.8 | 50.2375  | Ref | -0.52 | -0.17 | -0.76 | -0.28 | -0.91 | -0.04 | -0.69 | 1800  | 1120  | 1540  | 1150  | 1770  | 998   | 1910  | 1200  | 612.4 | 2445.4 | 4 | 0.0123 | 5.035 |
| Vimentin<br>(Fragment) OS=Ovis<br>aries PE=2 SV=1 | tr A4ZYA<br>6 A4ZYA6<br>_SHEEP | IGDL<br>YEEE<br>MR         | 91% | 40.3 | 49.7064  | Ref | -0.48 | -0.07 | -1    | -0.25 | -0.92 | -0.07 | -0.84 | 87700 | 52100 | 75100 | 43900 | 81900 | 45200 | 85100 | 49400 | 779.9 | 1557.7 | 2 | 0.0189 | 12.13 |

|                                                   |                                |                    |     |      |          |     |       |       |      |       |       |       |       |       |       |       |       |        |       |       |       |       |        |   |        |       |
|---------------------------------------------------|--------------------------------|--------------------|-----|------|----------|-----|-------|-------|------|-------|-------|-------|-------|-------|-------|-------|-------|--------|-------|-------|-------|-------|--------|---|--------|-------|
| Vimentin<br>(Fragment) OS=Ovis<br>aries PE=2 SV=1 | tr A4ZYA<br>6 A4ZYA6<br>_SHEEP | IGDL<br>YEEE<br>MR | 95% | 48   | 49.97264 | Ref | -0.5  | -0.1  | -1.2 | -0.2  | -0.82 | -0.09 | -0.89 | 13400 | 7450  | 10700 | 5630  | 12300  | 7010  | 12100 | 6890  | 779.9 | 1557.8 | 2 | 0.014  | 8.996 |
| Vimentin<br>(Fragment) OS=Ovis<br>aries PE=2 SV=1 | tr A4ZYA<br>6 A4ZYA6<br>_SHEEP | IGDL<br>YEEE<br>MR | 95% | 48.6 | 50.02015 | Ref | -0.46 | 0.06  | -1.1 | -0.22 | -0.92 | -0.1  | -0.94 | 1E+05 | 68800 | 1E+05 | 53500 | 110000 | 58800 | 1E+05 | 60200 | 779.9 | 1557.8 | 2 | 0.0113 | 7.264 |
| Vimentin<br>(Fragment) OS=Ovis<br>aries PE=2 SV=1 | tr A4ZYA<br>6 A4ZYA6<br>_SHEEP | IGDL<br>YEEE<br>MR | 95% | 45.9 | 50.18139 | Ref | -0.51 | 0.074 | -1.2 | -0.15 | -1    | -0.04 | -0.93 | 16300 | 9960  | 16200 | 7600  | 17100  | 8240  | 16900 | 9010  | 779.9 | 1557.8 | 2 | 0.0101 | 6.481 |
| Vimentin<br>(Fragment) OS=Ovis<br>aries PE=2 SV=1 | tr A4ZYA<br>6 A4ZYA6<br>_SHEEP | IGDL<br>YEEE<br>MR | 95% | 44.9 | 50.20697 | Ref | 0.18  | 0.26  | -1.1 | -0.58 | -1    | -0.25 | -0.9  | 2000  | 2570  | 2940  | 1290  | 2030   | 1320  | 2330  | 1480  | 779.9 | 1557.8 | 2 | 0.0091 | 5.853 |
| Vimentin<br>(Fragment) OS=Ovis<br>aries PE=2 SV=1 | tr A4ZYA<br>6 A4ZYA6<br>_SHEEP | IGDL<br>YEEE<br>mR | 87% | 37.8 | 49.53837 | Ref | -0.39 | 0.063 | -1.1 | -0.22 | -0.98 | -0.13 | -0.9  | 31400 | 20800 | 30900 | 15700 | 31300  | 16200 | 30500 | 17800 | 787.9 | 1573.7 | 2 | 0.0122 | 7.732 |
| Vimentin<br>(Fragment) OS=Ovis<br>aries PE=2 SV=1 | tr A4ZYA<br>6 A4ZYA6<br>_SHEEP | IGDL<br>YEEE<br>mR | 70% | 32.2 | 49.51988 | Ref | -0.4  | 0.15  | -1   | -0.31 | -0.94 | -0.16 | -0.91 | 20500 | 13900 | 22100 | 11100 | 19800  | 11200 | 20100 | 11900 | 787.9 | 1573.7 | 2 | 0.0115 | 7.275 |



|                                                   |                                |                                     |     |      |          |     |                                       |       |                                           |       |                                           |       |                                          |      |                                       |                                       |                                           |                                           |                                           |                                      |                                  |       |        |   |        |       |
|---------------------------------------------------|--------------------------------|-------------------------------------|-----|------|----------|-----|---------------------------------------|-------|-------------------------------------------|-------|-------------------------------------------|-------|------------------------------------------|------|---------------------------------------|---------------------------------------|-------------------------------------------|-------------------------------------------|-------------------------------------------|--------------------------------------|----------------------------------|-------|--------|---|--------|-------|
| Vimentin<br>(Fragment) OS=Ovis<br>aries PE=2 SV=1 | tr A4ZYA<br>6 A4ZYA6<br>_SHEEP | ILQD<br>SVDF<br>SLAD<br>AINT<br>EFk | 95% | 75.3 | 55.47047 | Ref | -0.48                                 | -0.14 | -0.87                                     | -0.32 | -0.63                                     | -0.28 | -0.43                                    | 3580 | 2450                                  | 3360                                  | 2280                                      | 3680                                      | 2600                                      | 3450                                 | 3090                             | 912.2 | 2733.4 | 3 | 0.0267 | 9.753 |
| Vimentin<br>(Fragment) OS=Ovis<br>aries PE=2 SV=1 | tr A4ZYA<br>6 A4ZYA6<br>_SHEEP | ILQD<br>SVDF<br>SLAD<br>AINT<br>EFk | 95% | 65   | 55.41734 | Ref | -0.37                                 | -0.03 | -1.3                                      | -0.17 | -1.1                                      | -0.15 | -0.78                                    | 450  | 274                                   | 375                                   | 170                                       | 422                                       | 198                                       | 389                                  | 251                              | 912.2 | 2733.5 | 3 | 0.0157 | 5.727 |
| Vimentin<br>(Fragment) OS=Ovis<br>aries PE=2 SV=1 | tr A4ZYA<br>6 A4ZYA6<br>_SHEEP | ILQD<br>SVDF<br>SLAD<br>AINT<br>EFk | 75% | 40   | 55.39436 | Ref | Value<br>Missing (-<br>2.3710<br>272) | 0.38  | Value<br>Missi<br>ng (-<br>2.655<br>3156) | 0.018 | Value<br>Missin<br>g (-<br>2.5999<br>224) | 0.74  | Value<br>Missin<br>g (-<br>2.6518<br>15) | 132  | Value<br>Missing (-<br>2.371027<br>2) | 113                                   | Value<br>Missin<br>g (-<br>2.6553<br>156) | 109                                       | Value<br>Missi<br>ng (-<br>2.599<br>9224) | 163                                  | Value<br>Missing (-<br>2.651815) | 912.2 | 2733.5 | 3 | 0.0116 | 4.257 |
| Vimentin<br>(Fragment) OS=Ovis<br>aries PE=2 SV=1 | tr A4ZYA<br>6 A4ZYA6<br>_SHEEP | ILQD<br>SVDF<br>SLAD<br>AINT<br>EFk | 73% | 39.4 | 55.42504 | Ref | 0.15                                  | -0.31 | Value<br>Missi<br>ng (-<br>2.978<br>3185) | 0.028 | Value<br>Missin<br>g (-<br>2.9229<br>252) | 0.36  | Value<br>Missin<br>g (-<br>2.9748<br>18) | 205  | 132                                   | Value<br>Missing (-<br>2.9783<br>185) | 105                                       | Value<br>Missi<br>ng (-<br>2.922<br>9252) | 163                                       | Value<br>Missi<br>ng (-<br>2.974818) | 187                              | 912.2 | 2733.5 | 3 | 0.0135 | 4.926 |
| Vimentin<br>(Fragment) OS=Ovis<br>aries PE=2 SV=1 | tr A4ZYA<br>6 A4ZYA6<br>_SHEEP | mAL<br>DIEI<br>ATYR                 | 83% | 39.2 | 52.62214 | Ref | -0.39                                 | -0.18 | -0.51                                     | -0.38 | -0.74                                     | -0.23 | -0.57                                    | 3510 | 2730                                  | 3420                                  | 3070                                      | 3700                                      | 2520                                      | 3730                                 | 2930                             | 800.4 | 1598.8 | 2 | 0.0163 | 10.2  |
| Vimentin<br>(Fragment) OS=Ovis<br>aries PE=2 SV=1 | tr A4ZYA<br>6 A4ZYA6<br>_SHEEP | mAL<br>DIEI<br>ATYR                 | 94% | 49.8 | 52.4976  | Ref | -0.51                                 | -0.12 | -0.5                                      | -0.54 | -0.61                                     | -0.34 | -0.46                                    | 8020 | 5450                                  | 7720                                  | 6660                                      | 7160                                      | 5950                                      | 7460                                 | 6830                             | 534   | 1598.9 | 3 | 0.0142 | 8.877 |

|                                                   |                                |                     |     |      |          |     |       |       |       |       |       |       |       |       |       |       |       |       |       |       |       |       |        |   |        |       |
|---------------------------------------------------|--------------------------------|---------------------|-----|------|----------|-----|-------|-------|-------|-------|-------|-------|-------|-------|-------|-------|-------|-------|-------|-------|-------|-------|--------|---|--------|-------|
| Vimentin<br>(Fragment) OS=Ovis<br>aries PE=2 SV=1 | tr A4ZYA<br>6 A4ZYA6<br>_SHEEP | mAL<br>DIEI<br>ATYR | 70% | 35.3 | 52.564   | Ref | -0.36 | -0.08 | -0.86 | -0.27 | -0.89 | -0.07 | -0.91 | 27900 | 19700 | 26000 | 17000 | 28200 | 16000 | 29400 | 16300 | 800.4 | 1598.9 | 2 | 0.0132 | 8.229 |
| Vimentin<br>(Fragment) OS=Ovis<br>aries PE=2 SV=1 | tr A4ZYA<br>6 A4ZYA6<br>_SHEEP | mAL<br>DIEI<br>ATYR | 80% | 38   | 52.6261  | Ref | -0.48 | -0.17 | -0.87 | -0.38 | -0.75 | -0.05 | -0.74 | 16700 | 10300 | 13900 | 9570  | 14900 | 10100 | 17000 | 10400 | 800.4 | 1598.8 | 2 | 0.0152 | 9.517 |
| Vimentin<br>(Fragment) OS=Ovis<br>aries PE=2 SV=1 | tr A4ZYA<br>6 A4ZYA6<br>_SHEEP | mAL<br>DIEI<br>ATYR | 95% | 52.5 | 52.68982 | Ref | -0.29 | -0.24 | -0.79 | -0.18 | -0.7  | -0.16 | -0.78 | 5910  | 4840  | 5440  | 4170  | 7020  | 4260  | 6490  | 4170  | 534   | 1598.9 | 3 | 0.0109 | 6.814 |
| Vimentin<br>(Fragment) OS=Ovis<br>aries PE=2 SV=1 | tr A4ZYA<br>6 A4ZYA6<br>_SHEEP | mAL<br>DIEI<br>ATYR | 89% | 44.4 | 52.63477 | Ref | -0.33 | -0.24 | -0.64 | -0.42 | -0.68 | -0.18 | -0.53 | 1540  | 1230  | 1420  | 1210  | 1560  | 1130  | 1670  | 1310  | 534   | 1598.9 | 3 | 0.008  | 4.995 |
| Vimentin<br>(Fragment) OS=Ovis<br>aries PE=2 SV=1 | tr A4ZYA<br>6 A4ZYA6<br>_SHEEP | mAL<br>DIEI<br>ATYR | 63% | 34   | 52.74075 | Ref | -0.48 | -0.05 | -0.97 | -0.27 | -1    | -0.04 | -0.82 | 16100 | 9680  | 14200 | 8440  | 15100 | 7920  | 16200 | 9300  | 800.4 | 1598.9 | 2 | 0.0064 | 4.029 |
| Vimentin<br>(Fragment) OS=Ovis<br>aries PE=2 SV=1 | tr A4ZYA<br>6 A4ZYA6<br>_SHEEP | mAL<br>DIEI<br>ATYR | 86% | 42   | 52.7426  | Ref | -0.23 | -0.29 | -0.57 | -0.37 | -0.55 | -0.3  | -0.72 | 1130  | 958   | 996   | 924   | 1170  | 900   | 1120  | 833   | 534   | 1598.9 | 3 | 0.0067 | 4.189 |

|                                                   |                                |                     |     |      |          |     |       |       |       |       |       |       |       |      |      |      |      |      |      |      |      |       |        |   |        |       |
|---------------------------------------------------|--------------------------------|---------------------|-----|------|----------|-----|-------|-------|-------|-------|-------|-------|-------|------|------|------|------|------|------|------|------|-------|--------|---|--------|-------|
| Vimentin<br>(Fragment) OS=Ovis<br>aries PE=2 SV=1 | tr A4ZYA<br>6 A4ZYA6<br>_SHEEP | mAL<br>DIEI<br>ATYR | 67% | 34.9 | 52.78097 | Ref | -0.55 | -0.04 | -0.93 | -0.22 | -0.96 | -0.03 | -0.87 | 3980 | 2320 | 3600 | 2170 | 3910 | 2040 | 4090 | 2260 | 800.4 | 1598.9 | 2 | 0.0045 | 2.804 |
| Vimentin<br>(Fragment) OS=Ovis<br>aries PE=2 SV=1 | tr A4ZYA<br>6 A4ZYA6<br>_SHEEP | mAL<br>DIEI<br>ATYR | 95% | 55.7 | 52.74366 | Ref | -0.58 | -0.45 | -0.9  | -0.23 | -0.69 | 0.13  | -0.74 | 731  | 429  | 507  | 416  | 733  | 466  | 856  | 464  | 534   | 1598.9 | 3 | 0.0069 | 4.302 |
| Vimentin<br>(Fragment) OS=Ovis<br>aries PE=2 SV=1 | tr A4ZYA<br>6 A4ZYA6<br>_SHEEP | mAL<br>DIEI<br>ATYR | 52% | 32.4 | 52.73129 | Ref | -0.35 | -0.62 | -0.49 | -0.28 | -0.23 | -0.59 | -0.28 | 256  | 226  | 203  | 250  | 318  | 286  | 234  | 288  | 534   | 1598.9 | 3 | 0.0062 | 3.851 |
| Vimentin<br>(Fragment) OS=Ovis<br>aries PE=2 SV=1 | tr A4ZYA<br>6 A4ZYA6<br>_SHEEP | mAL<br>DIEI<br>ATYR | 84% | 40.7 | 52.53457 | Ref | -0.39 | -0.37 | -0.5  | -0.33 | -0.57 | -0.47 | -0.28 | 2910 | 2320 | 2540 | 2620 | 3250 | 2400 | 2690 | 3030 | 539.3 | 1614.8 | 3 | 0.0102 | 6.292 |
| Vimentin<br>(Fragment) OS=Ovis<br>aries PE=2 SV=1 | tr A4ZYA<br>6 A4ZYA6<br>_SHEEP | mAL<br>DIEI<br>ATYR | 58% | 33.2 | 52.48993 | Ref | -0.45 | -0.17 | -0.32 | -0.44 | -0.74 | -0.35 | -0.37 | 3950 | 3210 | 4230 | 4270 | 4360 | 3070 | 4230 | 4140 | 539.3 | 1614.9 | 3 | 0.0082 | 5.048 |
| Vimentin<br>(Fragment) OS=Ovis<br>aries PE=2 SV=1 | tr A4ZYA<br>6 A4ZYA6<br>_SHEEP | mAL<br>DIEI<br>ATYR | 73% | 35.6 | 52.36867 | Ref | -0.36 | -0.14 | -0.93 | -0.22 | -0.81 | -0.19 | -0.67 | 2160 | 1550 | 1950 | 1270 | 2280 | 1320 | 2120 | 1520 | 808.4 | 1614.8 | 2 | 0.0147 | 9.123 |

|                                                   |                                |                     |     |      |          |     |       |       |       |       |       |       |       |      |      |      |      |      |      |      |      |       |        |   |        |       |
|---------------------------------------------------|--------------------------------|---------------------|-----|------|----------|-----|-------|-------|-------|-------|-------|-------|-------|------|------|------|------|------|------|------|------|-------|--------|---|--------|-------|
| Vimentin<br>(Fragment) OS=Ovis<br>aries PE=2 SV=1 | tr A4ZYA<br>6 A4ZYA6<br>_SHEEP | mAL<br>DIEI<br>ATYR | 79% | 38.3 | 52.53263 | Ref | -0.48 | -0.24 | -0.55 | -0.62 | -0.52 | -0.24 | -0.22 | 1080 | 845  | 1090 | 980  | 1030 | 965  | 1220 | 1230 | 539.3 | 1614.9 | 3 | 0.0093 | 5.735 |
| Vimentin<br>(Fragment) OS=Ovis<br>aries PE=2 SV=1 | tr A4ZYA<br>6 A4ZYA6<br>_SHEEP | mAL<br>DIEI<br>ATYR | 66% | 34.8 | 52.50271 | Ref | 0.36  | 0.31  | -0.78 | -0.85 | -0.92 | -0.62 | -0.71 | 1990 | 3430 | 3580 | 1890 | 1990 | 1650 | 2120 | 1980 | 539.3 | 1614.9 | 3 | 0.0083 | 5.159 |
| Vimentin<br>(Fragment) OS=Ovis<br>aries PE=2 SV=1 | tr A4ZYA<br>6 A4ZYA6<br>_SHEEP | mAL<br>DIEI<br>ATYR | 88% | 42.9 | 52.67019 | Ref | 0.13  | 0.13  | -0.53 | -0.63 | -0.64 | -0.54 | -0.83 | 2290 | 3240 | 3510 | 2490 | 2550 | 2230 | 2480 | 2010 | 539.3 | 1614.9 | 3 | #####  | 0.039 |
| Vimentin<br>(Fragment) OS=Ovis<br>aries PE=2 SV=1 | tr A4ZYA<br>6 A4ZYA6<br>_SHEEP | mAL<br>DIEI<br>ATYR | 94% | 49.6 | 52.50527 | Ref | -0.38 | -0.15 | -0.44 | -0.17 | -0.74 | -0.31 | -0.67 | 580  | 511  | 650  | 599  | 794  | 468  | 658  | 509  | 539.3 | 1614.9 | 3 | 0.0067 | 4.157 |
| Vimentin<br>(Fragment) OS=Ovis<br>aries PE=2 SV=1 | tr A4ZYA<br>6 A4ZYA6<br>_SHEEP | mAL<br>DIEI<br>ATYR | 54% | 32.5 | 52.52647 | Ref | -0.13 | -0.61 | -0.44 | -0.35 | -0.2  | -0.67 | -0.36 | 307  | 335  | 262  | 330  | 388  | 376  | 282  | 347  | 539.3 | 1614.9 | 3 | 0.0063 | 3.916 |
| Vimentin<br>(Fragment) OS=Ovis<br>aries PE=2 SV=1 | tr A4ZYA<br>6 A4ZYA6<br>_SHEEP | mAL<br>DIEI<br>ATyR | 82% | 40.5 | 53.46388 | Ref | -0.31 | -0.3  | -0.64 | -0.36 | -0.77 | -0.17 | -0.71 | 6400 | 4640 | 5090 | 4520 | 6040 | 3970 | 6300 | 4300 | 635.4 | 1903.1 | 3 | 0.0103 | 5.386 |

|                                                   |                                |                     |     |      |          |     |       |       |       |       |       |       |       |       |        |       |       |        |       |       |       |       |        |   |        |       |
|---------------------------------------------------|--------------------------------|---------------------|-----|------|----------|-----|-------|-------|-------|-------|-------|-------|-------|-------|--------|-------|-------|--------|-------|-------|-------|-------|--------|---|--------|-------|
| Vimentin<br>(Fragment) OS=Ovis<br>aries PE=2 SV=1 | tr A4ZYA<br>6 A4ZYA6<br>_SHEEP | mAL<br>DIEI<br>ATyR | 77% | 39.1 | 53.73356 | Ref | -0.41 | -0.29 | -0.62 | -0.36 | -0.72 | -0.23 | -0.66 | 18800 | 12400  | 14500 | 13000 | 17100  | 11700 | 17100 | 12600 | 640.7 | 1919.1 | 3 | 0.0138 | 7.176 |
| Vimentin<br>(Fragment) OS=Ovis<br>aries PE=2 SV=1 | tr A4ZYA<br>6 A4ZYA6<br>_SHEEP | nLQE<br>AEE<br>WYK  | 72% | 36.9 | 53.31047 | Ref | -0.38 | -0.13 | -1.1  | -0.21 | -0.9  | -0.18 | -0.77 | 2E+05 | 107000 | 1E+05 | 81800 | 162000 | 87500 | 2E+05 | 99500 | 640   | 1917   | 3 | 0.0165 | 8.622 |
| Vimentin<br>(Fragment) OS=Ovis<br>aries PE=2 SV=1 | tr A4ZYA<br>6 A4ZYA6<br>_SHEEP | nLQE<br>AEE<br>WYK  | 95% | 56.1 | 53.3668  | Ref | -0.49 | 0.026 | -1.2  | -0.3  | -0.88 | -0.19 | -0.84 | 59700 | 32400  | 50200 | 24000 | 49500  | 28800 | 48700 | 30800 | 959.5 | 1917   | 2 | 0.015  | 7.811 |
| Vimentin<br>(Fragment) OS=Ovis<br>aries PE=2 SV=1 | tr A4ZYA<br>6 A4ZYA6<br>_SHEEP | nLQE<br>AEE<br>WYK  | 66% | 33.8 | 53.42168 | Ref | -0.4  | -0.32 | -0.86 | -0.42 | -0.6  | -0.02 | -0.68 | 7890  | 5350   | 6140  | 4740  | 7120   | 5480  | 8580  | 5360  | 480.3 | 1917   | 4 | 0.0027 | 1.404 |
| Vimentin<br>(Fragment) OS=Ovis<br>aries PE=2 SV=1 | tr A4ZYA<br>6 A4ZYA6<br>_SHEEP | nLQE<br>AEE<br>WYK  | 95% | 67.6 | 53.35897 | Ref | -0.52 | 0.081 | -1.1  | -0.22 | -0.92 | 0.048 | -0.95 | 8910  | 5730   | 9440  | 4580  | 9490   | 5110  | 10400 | 5180  | 959.5 | 1917   | 2 | 0.0132 | 6.862 |
| Vimentin<br>(Fragment) OS=Ovis<br>aries PE=2 SV=1 | tr A4ZYA<br>6 A4ZYA6<br>_SHEEP | nLQE<br>AEE<br>WYK  | 90% | 45.1 | 53.15548 | Ref | -0.57 | -0.22 | -0.84 | -0.35 | -0.52 | -0.26 | -0.77 | 11400 | 6110   | 8410  | 6130  | 9520   | 7380  | 9250  | 6450  | 640.3 | 1918   | 3 | 0.0183 | 9.56  |

|                                                   |                                |                    |     |      |          |     |       |       |       |       |       |       |       |       |        |       |        |        |       |       |        |       |        |   |        |       |
|---------------------------------------------------|--------------------------------|--------------------|-----|------|----------|-----|-------|-------|-------|-------|-------|-------|-------|-------|--------|-------|--------|--------|-------|-------|--------|-------|--------|---|--------|-------|
| Vimentin<br>(Fragment) OS=Ovis<br>aries PE=2 SV=1 | tr A4ZYA<br>6 A4ZYA6<br>_SHEEP | nLQE<br>AEE<br>WYK | 81% | 40   | 53.1534  | Ref | -0.35 | -0.34 | -0.77 | 0.005 | -0.8  | -0.21 | -0.65 | 5410  | 4360   | 4740  | 3950   | 7460   | 3730  | 5860  | 4300   | 640.3 | 1918   | 3 | 0.0149 | 7.747 |
| Vimentin<br>(Fragment) OS=Ovis<br>aries PE=2 SV=1 | tr A4ZYA<br>6 A4ZYA6<br>_SHEEP | qQYE<br>SVA<br>Ak  | 90% | 41.4 | 51.01558 | Ref | -0.53 | -0.07 | -1.2  | -0.27 | -0.7  | -0.09 | -1.1  | 6100  | 3150   | 4680  | 2350   | 5040   | 3280  | 5230  | 2600   | 655.8 | 1309.7 | 2 | 0.0107 | 8.172 |
| Vimentin<br>(Fragment) OS=Ovis<br>aries PE=2 SV=1 | tr A4ZYA<br>6 A4ZYA6<br>_SHEEP | qQYE<br>SVA<br>Ak  | 68% | 33.3 | 51.0149  | Ref | -0.5  | 0.025 | -0.69 | -0.11 | -1.1  | -0.12 | -1.2  | 5930  | 3550   | 5540  | 3790   | 6240   | 2670  | 5660  | 2570   | 655.8 | 1309.7 | 2 | 0.0106 | 8.08  |
| Vimentin<br>(Fragment) OS=Ovis<br>aries PE=2 SV=1 | tr A4ZYA<br>6 A4ZYA6<br>_SHEEP | qQYE<br>SVA<br>Ak  | 61% | 33.8 | 52.67028 | Ref | -0.5  | 0.2   | -1    | -0.17 | -0.96 | -0.03 | -1.2  | 3E+05 | 183000 | 3E+05 | 156000 | 309000 | 2E+05 | 3E+05 | 140000 | 544.6 | 1630.9 | 3 | 0.0143 | 8.787 |
| Vimentin<br>(Fragment) OS=Ovis<br>aries PE=2 SV=1 | tr A4ZYA<br>6 A4ZYA6<br>_SHEEP | qQYE<br>SVA<br>Ak  | 94% | 45.9 | 52.6167  | Ref | -0.45 | 0.032 | -1.2  | -0.18 | -0.91 | -0.1  | -0.94 | 21900 | 13600  | 20600 | 10100  | 22000  | 11600 | 21300 | 11800  | 816.5 | 1630.9 | 2 | 0.0095 | 5.824 |
| Vimentin<br>(Fragment) OS=Ovis<br>aries PE=2 SV=1 | tr A4ZYA<br>6 A4ZYA6<br>_SHEEP | qQYE<br>SVA<br>Ak  | 93% | 45.4 | 52.60422 | Ref | -0.53 | -0.02 | -0.99 | -0.2  | -0.91 | -0.04 | -0.86 | 17300 | 10400  | 16200 | 9240   | 17600  | 9420  | 18000 | 10100  | 816.5 | 1630.9 | 2 | 0.0183 | 11.2  |

|                                                   |                                |                         |     |      |          |     |       |       |       |       |       |       |       |       |        |       |        |        |       |       |        |       |        |   |        |       |
|---------------------------------------------------|--------------------------------|-------------------------|-----|------|----------|-----|-------|-------|-------|-------|-------|-------|-------|-------|--------|-------|--------|--------|-------|-------|--------|-------|--------|---|--------|-------|
| Vimentin<br>(Fragment) OS=Ovis<br>aries PE=2 SV=1 | tr A4ZYA<br>6 A4ZYA6<br>_SHEEP | qVD<br>QLT<br>NDk       | 55% | 30.3 | 50.3887  | Ref | -0.68 | 0.41  | -1.1  | -0.57 | -0.29 | -0.44 | -0.89 | 1190  | 708    | 1630  | 626    | 1020   | 1090  | 1020  | 743    | 674.4 | 1346.7 | 2 | 0.0132 | 9.759 |
| Vimentin<br>(Fragment) OS=Ovis<br>aries PE=2 SV=1 | tr A4ZYA<br>6 A4ZYA6<br>_SHEEP | qVD<br>QLTn<br>Dk       | 94% | 47.3 | 52.93915 | Ref | -0.35 | 0.034 | -0.93 | -0.39 | -0.96 | -0.19 | -1.1  | 33700 | 20300  | 28700 | 16500  | 26400  | 15600 | 27600 | 14800  | 835.5 | 1668.9 | 2 | 0.0173 | 10.37 |
| Vimentin<br>(Fragment) OS=Ovis<br>aries PE=2 SV=1 | tr A4ZYA<br>6 A4ZYA6<br>_SHEEP | qVD<br>QLTn<br>Dk       | 95% | 53.5 | 52.87598 | Ref | -0.37 | 0.089 | -0.92 | -0.26 | -1.1  | -0.18 | -0.99 | 13000 | 8420   | 12600 | 7020   | 12200  | 6070  | 11800 | 6700   | 835.5 | 1668.9 | 2 | 0.01   | 5.985 |
| Vimentin<br>(Fragment) OS=Ovis<br>aries PE=2 SV=1 | tr A4ZYA<br>6 A4ZYA6<br>_SHEEP | qVD<br>QLTn<br>Dk       | 95% | 48.9 | 53.02164 | Ref | -0.22 | -0.02 | -0.95 | -0.4  | -0.98 | -0.19 | -0.87 | 14700 | 10600  | 13200 | 7710   | 12500  | 7310  | 13200 | 8150   | 835.5 | 1668.9 | 2 | 0.0043 | 2.548 |
| Vimentin<br>(Fragment) OS=Ovis<br>aries PE=2 SV=1 | tr A4ZYA<br>6 A4ZYA6<br>_SHEEP | qVD<br>QLTn<br>DKA<br>R | 75% | 38   | 53.50376 | Ref | -0.47 | -0.03 | -1    | -0.36 | -0.97 | 0.11  | -0.81 | 2E+05 | 125000 | 2E+05 | 102000 | 180000 | 1E+05 | 2E+05 | 119000 | 633   | 1896   | 3 | 0.0177 | 9.327 |
| Vimentin<br>(Fragment) OS=Ovis<br>aries PE=2 SV=1 | tr A4ZYA<br>6 A4ZYA6<br>_SHEEP | qVD<br>QLTn<br>DKA<br>R | 54% | 33.2 | 53.41397 | Ref | -0.22 | 0.081 | -1.2  | -0.19 | -1    | -0.12 | -1    | 20500 | 15900  | 21200 | 9910   | 21800  | 10600 | 20800 | 11000  | 949   | 1896   | 2 | 0.0155 | 8.159 |

|                                                   |                                |                           |     |      |          |     |       |       |       |       |       |       |       |       |       |       |       |       |       |       |       |       |        |   |        |       |
|---------------------------------------------------|--------------------------------|---------------------------|-----|------|----------|-----|-------|-------|-------|-------|-------|-------|-------|-------|-------|-------|-------|-------|-------|-------|-------|-------|--------|---|--------|-------|
| Vimentin<br>(Fragment) OS=Ovis<br>aries PE=2 SV=1 | tr A4ZYA<br>6 A4ZYA6<br>_SHEEP | qVQ<br>SLTc<br>EVD<br>ALK | 95% | 82   | 54.04866 | Ref | -0.37 | -0.16 | -1.1  | -0.2  | -1    | -0.1  | -1    | 7910  | 4510  | 5650  | 3370  | 6840  | 3310  | 6660  | 3490  | 1045  | 2087.1 | 2 | 0.0202 | 9.688 |
| Vimentin<br>(Fragment) OS=Ovis<br>aries PE=2 SV=1 | tr A4ZYA<br>6 A4ZYA6<br>_SHEEP | qVQ<br>SLTc<br>EVD<br>ALK | 95% | 67.9 | 54.01311 | Ref | -0.47 | -0.23 | -1.2  | -0.24 | -1.1  | 0.01  | -1.1  | 56900 | 28000 | 36000 | 20900 | 44100 | 22000 | 47900 | 22200 | 696.7 | 2087.1 | 3 | 0.0177 | 8.47  |
| Vimentin<br>(Fragment) OS=Ovis<br>aries PE=2 SV=1 | tr A4ZYA<br>6 A4ZYA6<br>_SHEEP | qVQ<br>SLTc<br>EVD<br>ALK | 95% | 68   | 54.0431  | Ref | -0.47 | -0.07 | -1.1  | -0.22 | -0.97 | 0.13  | -1.3  | 40700 | 23300 | 33300 | 18300 | 37200 | 19300 | 43200 | 16100 | 696.7 | 2087.1 | 3 | 0.0171 | 8.211 |
| Vimentin<br>(Fragment) OS=Ovis<br>aries PE=2 SV=1 | tr A4ZYA<br>6 A4ZYA6<br>_SHEEP | qVQ<br>SLTc<br>EVD<br>ALK | 86% | 43.3 | 54.06    | Ref | -0.48 | -0.37 | -0.52 | -0.32 | -0.33 | -0.12 | -0.96 | 4360  | 3070  | 3590  | 3630  | 4600  | 3990  | 4830  | 2680  | 696.7 | 2087.1 | 3 | 0.0126 | 6.013 |
| Vimentin<br>(Fragment) OS=Ovis<br>aries PE=2 SV=1 | tr A4ZYA<br>6 A4ZYA6<br>_SHEEP | qVQ<br>SLTc<br>EVD<br>ALK | 95% | 72.4 | 54.06801 | Ref | -0.38 | -0.03 | -1    | -0.3  | -1.1  | -0.11 | -1    | 3890  | 2230  | 3080  | 1710  | 3160  | 1540  | 3300  | 1760  | 1045  | 2087.1 | 2 | 0.0107 | 5.129 |
| Vimentin<br>(Fragment) OS=Ovis<br>aries PE=2 SV=1 | tr A4ZYA<br>6 A4ZYA6<br>_SHEEP | qVQ<br>SLTc<br>EVD<br>ALK | 95% | 64.4 | 54.0636  | Ref | -0.19 | -0.13 | -0.76 | -0.34 | -0.96 | -0.21 | -0.76 | 7590  | 6020  | 6780  | 4920  | 7250  | 4120  | 7260  | 4900  | 696.7 | 2087.1 | 3 | 0.0122 | 5.841 |



|                                                   |                                |                            |     |      |          |     |       |       |       |       |       |       |       |       |       |       |       |       |       |       |       |       |        |   |        |       |
|---------------------------------------------------|--------------------------------|----------------------------|-----|------|----------|-----|-------|-------|-------|-------|-------|-------|-------|-------|-------|-------|-------|-------|-------|-------|-------|-------|--------|---|--------|-------|
| Vimentin<br>(Fragment) OS=Ovis<br>aries PE=2 SV=1 | tr A4ZYA<br>6 A4ZYA6<br>_SHEEP | qVQ<br>SLTc<br>EVD<br>ALK  | 95% | 53.7 | 54.08389 | Ref | -0.25 | -0.36 | -0.37 | -0.41 | -0.59 | -0.27 | -0.6  | 629   | 575   | 578   | 648   | 691   | 534   | 694   | 548   | 696.7 | 2087.1 | 3 | 0.0062 | 2.953 |
| Vimentin<br>(Fragment) OS=Ovis<br>aries PE=2 SV=1 | tr A4ZYA<br>6 A4ZYA6<br>_SHEEP | qVQ<br>SLTc<br>EVD<br>ALK  | 92% | 48   | 54.04149 | Ref | -0.39 | -0.24 | -1.3  | -0.24 | -0.79 | 0.059 | -0.67 | 360   | 242   | 290   | 151   | 360   | 214   | 403   | 242   | 696.7 | 2087.1 | 3 | 0.0164 | 7.852 |
| Vimentin<br>(Fragment) OS=Ovis<br>aries PE=2 SV=1 | tr A4ZYA<br>6 A4ZYA6<br>_SHEEP | qVQ<br>SLTc<br>EVD<br>ALK  | 51% | 33.5 | 54.05199 | Ref | -0.54 | -0.09 | -0.72 | -0.55 | -0.76 | -0.06 | -0.6  | 367   | 227   | 337   | 245   | 303   | 228   | 387   | 264   | 696.7 | 2087.1 | 3 | 0.0137 | 6.545 |
| Vimentin<br>(Fragment) OS=Ovis<br>aries PE=2 SV=1 | tr A4ZYA<br>6 A4ZYA6<br>_SHEEP | rQV<br>QSLT<br>cEVD<br>ALK | 65% | 34.8 | 54.5845  | Ref | -0.26 | -0.36 | -0.83 | -0.19 | -0.74 | -0.02 | -0.72 | 3480  | 2980  | 3020  | 2440  | 4210  | 2510  | 4310  | 2640  | 561.8 | 2243.2 | 4 | 0.0167 | 7.449 |
| Vimentin<br>(Fragment) OS=Ovis<br>aries PE=2 SV=1 | tr A4ZYA<br>6 A4ZYA6<br>_SHEEP | tLYT<br>SSPG<br>GVY<br>ATR | 95% | 51.6 | 52.65897 | Ref | -0.28 | -0.12 | -0.97 | -0.28 | -0.83 | -0.06 | -0.89 | 16100 | 12000 | 14600 | 9090  | 16100 | 9650  | 17100 | 9590  | 889   | 1775.9 | 2 | 0.0147 | 8.295 |
| Vimentin<br>(Fragment) OS=Ovis<br>aries PE=2 SV=1 | tr A4ZYA<br>6 A4ZYA6<br>_SHEEP | tLYT<br>SSPG<br>GVY<br>ATR | 74% | 36.3 | 52.68816 | Ref | -0.41 | -0.2  | -0.98 | -0.18 | -0.83 | -0.02 | -0.98 | 27300 | 17400 | 21800 | 14200 | 27300 | 15200 | 27900 | 14200 | 889   | 1775.9 | 2 | 0.0129 | 7.27  |

|                                                   |                                |                            |     |      |          |     |       |       |       |       |       |       |       |       |       |       |       |        |       |       |       |       |        |   |        |       |
|---------------------------------------------------|--------------------------------|----------------------------|-----|------|----------|-----|-------|-------|-------|-------|-------|-------|-------|-------|-------|-------|-------|--------|-------|-------|-------|-------|--------|---|--------|-------|
| Vimentin<br>(Fragment) OS=Ovis<br>aries PE=2 SV=1 | tr A4ZYA<br>6 A4ZYA6<br>_SHEEP | tLYT<br>SSPG<br>GVY<br>ATR | 94% | 46.9 | 52.64763 | Ref | -0.33 | -0.17 | -1    | -0.3  | -0.89 | -0.03 | -0.97 | 6470  | 4150  | 5020  | 3090  | 5680   | 3290  | 6270  | 3230  | 889   | 1775.9 | 2 | 0.0167 | 9.398 |
| Vimentin<br>(Fragment) OS=Ovis<br>aries PE=2 SV=1 | tr A4ZYA<br>6 A4ZYA6<br>_SHEEP | tLYT<br>SSPG<br>GVY<br>ATR | 52% | 32.1 | 52.67883 | Ref | -0.53 | -0.15 | -1.1  | -0.25 | -0.78 | -0.13 | -0.83 | 13400 | 7180  | 10200 | 6000  | 11700  | 7110  | 11600 | 7110  | 889   | 1775.9 | 2 | 0.0128 | 7.203 |
| Vimentin<br>(Fragment) OS=Ovis<br>aries PE=2 SV=1 | tr A4ZYA<br>6 A4ZYA6<br>_SHEEP | tNEK<br>VELQ<br>ELnD<br>R  | 87% | 42.1 | 54.42526 | Ref | -0.24 | -0.37 | -0.68 | -0.36 | -0.85 | -0.1  | -0.74 | 56800 | 42600 | 42100 | 38300 | 52700  | 32800 | 57500 | 36700 | 550   | 2196.2 | 4 | 0.0158 | 7.168 |
| Vimentin<br>(Fragment) OS=Ovis<br>aries PE=2 SV=1 | tr A4ZYA<br>6 A4ZYA6<br>_SHEEP | tNEK<br>VELQ<br>ELnD<br>R  | 65% | 36.6 | 54.45825 | Ref | -0.5  | 0.054 | -0.99 | -0.26 | -0.95 | 0.013 | -0.98 | 50300 | 31600 | 50400 | 27400 | 50200  | 27200 | 55300 | 27700 | 733.1 | 2196.2 | 3 | 0.0168 | 7.666 |
| Vimentin<br>(Fragment) OS=Ovis<br>aries PE=2 SV=1 | tr A4ZYA<br>6 A4ZYA6<br>_SHEEP | vEVE<br>RDN<br>LAED<br>IMR | 78% | 38.8 | 53.37497 | Ref | -0.44 | 0.026 | -1.3  | -0.1  | -0.92 | 0.074 | -0.84 | 1E+05 | 82000 | 1E+05 | 53600 | 139000 | 68600 | 1E+05 | 75300 | 665   | 1992   | 3 | 0.0134 | 6.734 |
| Vimentin<br>(Fragment) OS=Ovis<br>aries PE=2 SV=1 | tr A4ZYA<br>6 A4ZYA6<br>_SHEEP | vEVE<br>RDN<br>LAED<br>IMR | 95% | 66.9 | 53.41515 | Ref | -0.45 | -0.12 | -0.64 | -0.15 | -0.84 | -0.07 | -0.56 | 1460  | 1310  | 1790  | 1400  | 2160   | 1170  | 2080  | 1480  | 997   | 1992   | 2 | 0.0124 | 6.239 |

|                                                                     |                      |              |     |      |          |     |      |       |      |      |       |      |       |       |         |       |        |         |       |       |         |       |        |   |        |       |
|---------------------------------------------------------------------|----------------------|--------------|-----|------|----------|-----|------|-------|------|------|-------|------|-------|-------|---------|-------|--------|---------|-------|-------|---------|-------|--------|---|--------|-------|
| Alpha-1-antiproteinase<br>OS=Bos taurus<br>GN=SERPINA1 PE=1<br>SV=1 | sp P34955 A1AT_BOVIN | aALTI<br>DEK | 60% | 32.8 | 51.67911 | Ref | 0.58 | -0.13 | 0.61 | 0.45 | -0.15 | 0.86 | -0.03 | 1E+06 | 1850000 | 1E+06 | 2E+06  | 2260000 | 1E+06 | 3E+06 | 1470000 | 490.3 | 1467.9 | 3 | 0.0104 | 7.09  |
| Alpha-1-antiproteinase<br>OS=Bos taurus<br>GN=SERPINA1 PE=1<br>SV=1 | sp P34955 A1AT_BOVIN | aALTI<br>DEK | 76% | 36.3 | 52.06899 | Ref | 0.38 | 0.18  | 0.48 | 0.41 | 0.13  | 0.63 | 0.087 | 18800 | 21500   | 20300 | 28000  | 29600   | 21200 | 31200 | 21300   | 734.9 | 1467.9 | 2 | 0.0241 | 16.43 |
| Alpha-1-antiproteinase<br>OS=Bos taurus<br>GN=SERPINA1 PE=1<br>SV=1 | sp P34955 A1AT_BOVIN | aALTI<br>DEK | 57% | 32.4 | 51.82403 | Ref | 0.58 | 0.22  | 0.58 | 0.38 | -0.1  | 0.79 | -0.05 | 43700 | 73700   | 62600 | 89900  | 86100   | 54000 | 1E+05 | 57800   | 490.3 | 1467.9 | 3 | 0.0143 | 9.725 |
| Alpha-1-antiproteinase<br>OS=Bos taurus<br>GN=SERPINA1 PE=1<br>SV=1 | sp P34955 A1AT_BOVIN | aALTI<br>DEK | 75% | 36.2 | 51.65852 | Ref | 0.47 | 0.16  | 0.68 | 0.32 | -0.16 | 0.79 | -0.04 | 31400 | 42400   | 37100 | 59900  | 51300   | 32100 | 64900 | 36200   | 490.3 | 1467.9 | 3 | 0.0095 | 6.477 |
| Alpha-1-antiproteinase<br>OS=Bos taurus<br>GN=SERPINA1 PE=1<br>SV=1 | sp P34955 A1AT_BOVIN | aDLS<br>GITK | 88% | 40.1 | 51.5687  | Ref | 0.52 | 0.15  | 0.42 | 0.28 | 0.048 | 0.63 | 0.22  | 33700 | 41300   | 34600 | 46900  | 47000   | 34900 | 54400 | 40800   | 706.9 | 1411.8 | 2 | 0.0248 | 17.52 |
| Alpha-1-antiproteinase<br>OS=Bos taurus<br>GN=SERPINA1 PE=1<br>SV=1 | sp P34955 A1AT_BOVIN | aDLS<br>GITK | 82% | 37.6 | 51.59182 | Ref | 0.48 | 0.059 | 0.41 | 0.35 | -0.15 | 0.8  | 0.26  | 3E+05 | 344000  | 3E+05 | 399000 | 422000  | 3E+05 | 5E+05 | 358000  | 706.9 | 1411.8 | 2 | 0.0179 | 12.68 |

|                                                                     |                      |                         |     |      |          |     |      |       |      |      |       |      |       |       |        |       |        |        |       |       |        |       |        |   |        |       |
|---------------------------------------------------------------------|----------------------|-------------------------|-----|------|----------|-----|------|-------|------|------|-------|------|-------|-------|--------|-------|--------|--------|-------|-------|--------|-------|--------|---|--------|-------|
| Alpha-1-antiproteinase<br>OS=Bos taurus<br>GN=SERPINA1 PE=1<br>SV=1 | sp P34955 A1AT_BOVIN | aDLS<br>GITk            | 69% | 34.3 | 51.28593 | Ref | 0.55 | -0.03 | 0.53 | 0.23 | -0.13 | 0.88 | 0.14  | 3E+05 | 444000 | 3E+05 | 533000 | 477000 | 3E+05 | 7E+05 | 403000 | 471.6 | 1411.8 | 3 | 0.0131 | 9.273 |
| Alpha-1-antiproteinase<br>OS=Bos taurus<br>GN=SERPINA1 PE=1<br>SV=1 | sp P34955 A1AT_BOVIN | aDLS<br>GITk            | 87% | 41.2 | 51.61296 | Ref | 0.49 | 0.22  | 0.37 | 0.39 | -0.14 | 0.74 | 0.15  | 28100 | 34200  | 30600 | 38100  | 42600  | 25800 | 49600 | 32600  | 471.6 | 1411.8 | 3 | 0.0253 | 17.89 |
| Alpha-1-antiproteinase<br>OS=Bos taurus<br>GN=SERPINA1 PE=1<br>SV=1 | sp P34955 A1AT_BOVIN | aDLS<br>GITk            | 92% | 42.5 | 51.11618 | Ref | 0.42 | 0.18  | 0.46 | 0.37 | 0.098 | 0.57 | 0.2   | 17500 | 20400  | 18600 | 25500  | 26300  | 19000 | 27600 | 21100  | 706.9 | 1411.8 | 2 | 0.0046 | 3.267 |
| Alpha-1-antiproteinase<br>OS=Bos taurus<br>GN=SERPINA1 PE=1<br>SV=1 | sp P34955 A1AT_BOVIN | aDLS<br>GITk            | 72% | 35.2 | 51.61296 | Ref | 0.44 | 0.45  | 0.31 | 0.25 | -0.03 | 0.48 | 0.35  | 9030  | 9930   | 10800 | 11100  | 11700  | 8400  | 12500 | 11300  | 471.6 | 1411.8 | 3 | 0.0253 | 17.89 |
| Alpha-1-antiproteinase<br>OS=Bos taurus<br>GN=SERPINA1 PE=1<br>SV=1 | sp P34955 A1AT_BOVIN | dFH<br>VDE<br>QTT<br>Vk | 92% | 47.8 | 53.62837 | Ref | 0.64 | 0.23  | 0.58 | 0.4  | -0.14 | 0.63 | -0.08 | 2E+05 | 247000 | 2E+05 | 290000 | 282000 | 2E+05 | 3E+05 | 183000 | 643   | 1926   | 3 | 0.0153 | 7.916 |
| Alpha-1-antiproteinase<br>OS=Bos taurus<br>GN=SERPINA1 PE=1<br>SV=1 | sp P34955 A1AT_BOVIN | dFH<br>VDE<br>QTT<br>Vk | 95% | 48.7 | 53.60932 | Ref | 0.62 | 0.27  | 0.5  | 0.4  | -0.3  | 0.72 | -0.13 | 15500 | 20800  | 17600 | 23300  | 23900  | 12900 | 27200 | 15000  | 964   | 1926   | 2 | 0.0147 | 7.653 |

|                                                                     |                      |                         |     |      |          |     |      |      |      |      |       |      |       |       |       |       |       |       |       |       |       |       |        |   |        |       |
|---------------------------------------------------------------------|----------------------|-------------------------|-----|------|----------|-----|------|------|------|------|-------|------|-------|-------|-------|-------|-------|-------|-------|-------|-------|-------|--------|---|--------|-------|
| Alpha-1-antiproteinase<br>OS=Bos taurus<br>GN=SERPINA1 PE=1<br>SV=1 | sp P34955 A1AT_BOVIN | dFH<br>VDE<br>QTT<br>Vk | 95% | 54.8 | 53.57169 | Ref | 0.45 | 0.25 | 0.56 | 0.43 | -0.09 | 0.6  | -0.14 | 20800 | 22000 | 20800 | 28900 | 29200 | 17700 | 29800 | 17800 | 964   | 1926   | 2 | 0.0166 | 8.598 |
| Alpha-1-antiproteinase<br>OS=Bos taurus<br>GN=SERPINA1 PE=1<br>SV=1 | sp P34955 A1AT_BOVIN | gNT<br>HTEI<br>Lk       | 86% | 39.5 | 51.9071  | Ref | 0.56 | 0.24 | 0.46 | 0.41 | -0.18 | 0.77 | 0.019 | 24600 | 34800 | 30300 | 39600 | 42100 | 24400 | 49200 | 29100 | 811   | 1619.9 | 2 | 0.0141 | 8.725 |
| Alpha-1-antiproteinase<br>OS=Bos taurus<br>GN=SERPINA1 PE=1<br>SV=1 | sp P34955 A1AT_BOVIN | gNT<br>HTEI<br>Lk       | 80% | 37.2 | 51.79911 | Ref | 0.47 | 0.14 | 0.5  | 0.34 | 0.092 | 0.65 | 0.058 | 22500 | 26500 | 22900 | 33100 | 32700 | 24000 | 36800 | 24300 | 811   | 1619.9 | 2 | 0.0121 | 7.442 |
| Alpha-1-antiproteinase<br>OS=Bos taurus<br>GN=SERPINA1 PE=1<br>SV=1 | sp P34955 A1AT_BOVIN | gnTH<br>TEILk           | 94% | 46.8 | 52.59847 | Ref | 0.57 | 0.13 | 0.48 | 0.41 | -0.23 | 0.79 | 0.056 | 8630  | 12100 | 9680  | 13800 | 14600 | 8160  | 17300 | 10300 | 811.5 | 1620.9 | 2 | 0.0231 | 14.21 |
| Alpha-1-antiproteinase<br>OS=Bos taurus<br>GN=SERPINA1 PE=1<br>SV=1 | sp P34955 A1AT_BOVIN | gnTH<br>TEILk           | 95% | 50.5 | 52.50683 | Ref | 0.58 | 0.13 | 0.47 | 0.36 | -0.08 | 0.81 | 0.024 | 10900 | 15700 | 12500 | 17700 | 18100 | 11700 | 22600 | 13000 | 811.5 | 1620.9 | 2 | 0.0184 | 11.35 |
| Alpha-1-antiproteinase<br>OS=Bos taurus<br>GN=SERPINA1 PE=1<br>SV=1 | sp P34955 A1AT_BOVIN | InDY<br>VEk             | 50% | 29.2 | 50.00134 | Ref | 0.28 | 0.34 | 0.17 | 0.36 | 0.17  | 0.52 | 0.23  | 24100 | 20500 | 23200 | 23100 | 29100 | 22300 | 29800 | 24100 | 593.3 | 1184.6 | 2 | 0.0083 | 6.978 |

|                                                                     |                      |                             |     |      |          |     |      |       |      |       |       |      |       |       |       |       |        |        |       |       |       |       |        |   |        |       |
|---------------------------------------------------------------------|----------------------|-----------------------------|-----|------|----------|-----|------|-------|------|-------|-------|------|-------|-------|-------|-------|--------|--------|-------|-------|-------|-------|--------|---|--------|-------|
| Alpha-1-antiproteinase<br>OS=Bos taurus<br>GN=SERPINA1 PE=1<br>SV=1 | sp P34955 A1AT_BOVIN | IGMFDLH<br>YcDk             | 63% | 33.9 | 52.27102 | Ref | 0.67 | 0.046 | 0.5  | 0.32  | -0.07 | 0.76 | -0.03 | 5750  | 8320  | 5870  | 9020   | 8760   | 5830  | 10900 | 6250  | 666   | 1995   | 3 | 0.0089 | 4.451 |
| Alpha-1-antiproteinase<br>OS=Bos taurus<br>GN=SERPINA1 PE=1<br>SV=1 | sp P34955 A1AT_BOVIN | IGMFDLH<br>YcDk             | 57% | 32.9 | 52.34363 | Ref | 0.56 | 0.085 | 0.37 | 0.26  | -0.03 | 0.63 | 0.18  | 951   | 1030  | 806   | 1100   | 1130   | 803   | 1320  | 962   | 666   | 1995   | 3 | 0.0054 | 2.723 |
| Alpha-1-antiproteinase<br>OS=Bos taurus<br>GN=SERPINA1 PE=1<br>SV=1 | sp P34955 A1AT_BOVIN | INNE<br>LLAK                | 51% | 29   | 49.44389 | Ref | 0.79 | 0.28  | 0.4  | 0.062 | -0.05 | 0.53 | -0.15 | 31500 | 38700 | 29400 | 35800  | 31200  | 25300 | 39400 | 24400 | 508.3 | 1521.9 | 3 | 0.0097 | 6.343 |
| Alpha-1-antiproteinase<br>OS=Bos taurus<br>GN=SERPINA1 PE=1<br>SV=1 | sp P34955 A1AT_BOVIN | INNE<br>LLAK                | 83% | 35.9 | 49.33836 | Ref | 0.7  | 0.23  | 0.37 | 0.24  | 0.012 | 0.59 | -0.07 | 11600 | 14700 | 11600 | 14300  | 14400  | 10700 | 16700 | 10500 | 762   | 1521.9 | 2 | 0.0064 | 4.231 |
| Alpha-1-antiproteinase<br>OS=Bos taurus<br>GN=SERPINA1 PE=1<br>SV=1 | sp P34955 A1AT_BOVIN | IQQL<br>EDkL<br>NNE<br>LLAK | 54% | 28   | 49.84932 | Ref | 0.61 | -0.02 | 0.35 | 0.61  | -0.09 | 0.4  | 0.16  | 232   | 263   | 184   | 267    | 352    | 189   | 277   | 234   | 671.2 | 2680.6 | 4 | 0.0079 | 2.958 |
| Alpha-1-antiproteinase<br>OS=Bos taurus<br>GN=SERPINA1 PE=1<br>SV=1 | sp P34955 A1AT_BOVIN | ISISE<br>TYDL<br>k          | 93% | 45.9 | 53.07855 | Ref | 0.58 | 0.035 | 0.47 | 0.32  | -0.1  | 0.87 | 0.16  | 59200 | 94600 | 70100 | 106000 | 106000 | 69200 | 1E+05 | 85800 | 889   | 1776   | 2 | 0.0207 | 11.66 |

|                                                                         |                          |                    |     |      |          |     |      |       |      |      |       |      |       |       |        |       |        |        |       |       |        |     |      |   |        |       |
|-------------------------------------------------------------------------|--------------------------|--------------------|-----|------|----------|-----|------|-------|------|------|-------|------|-------|-------|--------|-------|--------|--------|-------|-------|--------|-----|------|---|--------|-------|
| Alpha-1-<br>antiproteinase<br>OS=Bos taurus<br>GN=SERPINA1 PE=1<br>SV=1 | sp P34955 A1AT_B<br>OVIN | ISISE<br>TYDL<br>k | 95% | 49.2 | 53.0488  | Ref | 0.5  | 0.025 | 0.53 | 0.42 | 0.024 | 0.84 | 0.015 | 66300 | 97800  | 76600 | 122000 | 124000 | 82600 | 2E+05 | 85100  | 889 | 1776 | 2 | 0.0191 | 10.77 |
| Alpha-1-<br>antiproteinase<br>OS=Bos taurus<br>GN=SERPINA1 PE=1<br>SV=1 | sp P34955 A1AT_B<br>OVIN | ISISE<br>TYDL<br>k | 87% | 42.6 | 53.02355 | Ref | 0.45 | -0.08 | 0.43 | 0.39 | -0.12 | 1.1  | 0.16  | 1E+05 | 214000 | 2E+05 | 257000 | 275000 | 2E+05 | 4E+05 | 212000 | 593 | 1776 | 3 | 0.0163 | 9.157 |
| Alpha-1-<br>antiproteinase<br>OS=Bos taurus<br>GN=SERPINA1 PE=1<br>SV=1 | sp P34955 A1AT_B<br>OVIN | ISISE<br>TYDL<br>k | 89% | 44.5 | 53.01841 | Ref | 0.47 | -0.32 | 0.55 | 0.32 | -0.2  | 0.97 | 0.16  | 53100 | 62800  | 39600 | 80700  | 76200  | 46400 | 1E+05 | 61500  | 593 | 1776 | 3 | 0.0159 | 8.954 |
| Alpha-1-<br>antiproteinase<br>OS=Bos taurus<br>GN=SERPINA1 PE=1<br>SV=1 | sp P34955 A1AT_B<br>OVIN | ISISE<br>TYDL<br>k | 89% | 42   | 52.9848  | Ref | 0.46 | 0.1   | 0.59 | 0.31 | -0.22 | 0.92 | 0.19  | 14200 | 21800  | 18500 | 29100  | 26400  | 16000 | 36800 | 22000  | 889 | 1776 | 2 | 0.0156 | 8.782 |
| Alpha-1-<br>antiproteinase<br>OS=Bos taurus<br>GN=SERPINA1 PE=1<br>SV=1 | sp P34955 A1AT_B<br>OVIN | ISISE<br>TYDL<br>k | 95% | 48.7 | 52.98517 | Ref | 0.63 | 0.13  | 0.43 | 0.43 | -0.13 | 0.79 | 0.01  | 68000 | 104000 | 79700 | 110000 | 121000 | 71700 | 1E+05 | 82100  | 889 | 1776 | 2 | 0.0152 | 8.568 |
| Alpha-1-<br>antiproteinase<br>OS=Bos taurus<br>GN=SERPINA1 PE=1<br>SV=1 | sp P34955 A1AT_B<br>OVIN | ISISE<br>TYDL<br>k | 94% | 49.7 | 52.98517 | Ref | 0.51 | -0.03 | 0.59 | 0.32 | -0.13 | 0.95 | -0.03 | 2E+05 | 347000 | 3E+05 | 447000 | 409000 | 3E+05 | 6E+05 | 292000 | 593 | 1776 | 3 | 0.0152 | 8.549 |

|                                                                     |                      |                    |     |      |          |     |      |       |      |      |       |      |       |       |        |       |        |        |       |       |        |     |      |   |        |       |
|---------------------------------------------------------------------|----------------------|--------------------|-----|------|----------|-----|------|-------|------|------|-------|------|-------|-------|--------|-------|--------|--------|-------|-------|--------|-----|------|---|--------|-------|
| Alpha-1-antiproteinase<br>OS=Bos taurus<br>GN=SERPINA1 PE=1<br>SV=1 | sp P34955 A1AT_BOVIN | ISISE<br>TYDL<br>k | 87% | 42.7 | 52.99643 | Ref | 0.2  | 0.21  | 0.53 | 0.55 | -0.04 | 0.78 | 0.19  | 44800 | 55000  | 59700 | 83800  | 93900  | 54300 | 1E+05 | 66100  | 593 | 1776 | 3 | 0.0148 | 8.346 |
| Alpha-1-antiproteinase<br>OS=Bos taurus<br>GN=SERPINA1 PE=1<br>SV=1 | sp P34955 A1AT_BOVIN | ISISE<br>TYDL<br>k | 87% | 42.6 | 53.01913 | Ref | 0.46 | -0.24 | 0.47 | 0.43 | -0.08 | 1    | 0.11  | 3E+05 | 373000 | 2E+05 | 457000 | 490000 | 3E+05 | 7E+05 | 355000 | 593 | 1776 | 3 | 0.0143 | 8.026 |
| Alpha-1-antiproteinase<br>OS=Bos taurus<br>GN=SERPINA1 PE=1<br>SV=1 | sp P34955 A1AT_BOVIN | ISISE<br>TYDL<br>k | 85% | 41.4 | 52.97787 | Ref | 0.41 | 0.17  | 0.45 | 0.5  | -0.12 | 0.82 | 0.11  | 8510  | 11300  | 10400 | 14300  | 16200  | 9230  | 18500 | 11200  | 593 | 1776 | 3 | 0.0123 | 6.894 |
| Alpha-1-antiproteinase<br>OS=Bos taurus<br>GN=SERPINA1 PE=1<br>SV=1 | sp P34955 A1AT_BOVIN | ISISE<br>TYDL<br>k | 76% | 37   | 52.8582  | Ref | 0.63 | 0.025 | 0.32 | 0.44 | 0.043 | 0.7  | 0.2   | 6550  | 10000  | 7150  | 9870   | 11800  | 7820  | 12900 | 9050   | 889 | 1776 | 2 | 0.0114 | 6.441 |
| Alpha-1-antiproteinase<br>OS=Bos taurus<br>GN=SERPINA1 PE=1<br>SV=1 | sp P34955 A1AT_BOVIN | ISISE<br>TYDL<br>k | 91% | 43.4 | 52.80043 | Ref | 0.61 | 0.24  | 0.4  | 0.43 | -0.07 | 0.69 | 0.012 | 5560  | 8170   | 6870  | 8650   | 9740   | 6020  | 10600 | 6580   | 889 | 1776 | 2 | 0.0092 | 5.203 |
| Alpha-1-antiproteinase<br>OS=Bos taurus<br>GN=SERPINA1 PE=1<br>SV=1 | sp P34955 A1AT_BOVIN | ISISE<br>TYDL<br>k | 84% | 41.1 | 52.79792 | Ref | 0.47 | 0.32  | 0.37 | 0.27 | 0.24  | 0.5  | 0.12  | 5890  | 6790   | 6670  | 7740   | 7970   | 6780  | 8490  | 6460   | 593 | 1776 | 3 | 0.0079 | 4.43  |



|                                                                     |                      |                    |     |      |          |     |      |      |      |      |       |      |      |       |       |       |       |       |       |       |       |     |      |   |        |       |
|---------------------------------------------------------------------|----------------------|--------------------|-----|------|----------|-----|------|------|------|------|-------|------|------|-------|-------|-------|-------|-------|-------|-------|-------|-----|------|---|--------|-------|
| Alpha-1-antiproteinase<br>OS=Bos taurus<br>GN=SERPINA1 PE=1<br>SV=1 | sp P34955 A1AT_BOVIN | ISISE<br>TYDL<br>k | 84% | 40.8 | 52.76197 | Ref | 0.46 | 0.16 | 0.39 | 0.33 | 0.058 | 0.68 | 0.29 | 3690  | 4770  | 4210  | 5540  | 5860  | 4240  | 6830  | 5170  | 593 | 1776 | 3 | 0.0069 | 3.906 |
| Alpha-1-antiproteinase<br>OS=Bos taurus<br>GN=SERPINA1 PE=1<br>SV=1 | sp P34955 A1AT_BOVIN | ISISE<br>TYDL<br>k | 54% | 32.9 | 52.82128 | Ref | 0.42 | 0.24 | 0.34 | 0.32 | 0.082 | 0.69 | 0.12 | 3540  | 3860  | 3690  | 4450  | 4810  | 3570  | 5670  | 3790  | 593 | 1776 | 3 | 0.0068 | 3.805 |
| Alpha-1-antiproteinase<br>OS=Bos taurus<br>GN=SERPINA1 PE=1<br>SV=1 | sp P34955 A1AT_BOVIN | ISISE<br>TYDL<br>k | 89% | 42.4 | 53.09193 | Ref | 0.35 | 0.15 | 0.43 | 0.43 | 0.15  | 0.69 | 0.12 | 9050  | 10200 | 9630  | 13200 | 14500 | 10400 | 15800 | 10600 | 889 | 1776 | 2 | 0.0228 | 12.83 |
| Alpha-1-antiproteinase<br>OS=Bos taurus<br>GN=SERPINA1 PE=1<br>SV=1 | sp P34955 A1AT_BOVIN | ISISE<br>TYDL<br>k | 83% | 40.3 | 52.81831 | Ref | 0.39 | 0.21 | 0.42 | 0.34 | 0.095 | 0.61 | 0.22 | 13400 | 15000 | 14400 | 18700 | 19500 | 14400 | 21500 | 16200 | 593 | 1776 | 3 | 0.0086 | 4.835 |
| Alpha-1-antiproteinase<br>OS=Bos taurus<br>GN=SERPINA1 PE=1<br>SV=1 | sp P34955 A1AT_BOVIN | ISISE<br>TYDL<br>k | 91% | 43.8 | 52.80098 | Ref | 0.45 | -0   | 0.43 | 0.38 | -0.03 | 0.86 | 0.22 | 2770  | 3710  | 2950  | 4480  | 4770  | 3120  | 6060  | 3850  | 889 | 1776 | 2 | 0.0097 | 5.484 |
| Alpha-1-antiproteinase<br>OS=Bos taurus<br>GN=SERPINA1 PE=1<br>SV=1 | sp P34955 A1AT_BOVIN | ISISE<br>TYDL<br>k | 85% | 41.2 | 52.76197 | Ref | 0.43 | 0.16 | 0.47 | 0.39 | 0.013 | 0.79 | 0.15 | 6910  | 9480  | 8510  | 11800 | 12400 | 8320  | 14900 | 9460  | 593 | 1776 | 3 | 0.0069 | 3.906 |

|                                                                     |                   |               |     |      |          |     |      |       |      |      |       |      |       |       |       |       |       |       |       |       |       |       |      |   |        |       |
|---------------------------------------------------------------------|-------------------|---------------|-----|------|----------|-----|------|-------|------|------|-------|------|-------|-------|-------|-------|-------|-------|-------|-------|-------|-------|------|---|--------|-------|
| Alpha-1-antiproteinase<br>OS=Bos taurus<br>GN=SERPINA1 PE=1<br>SV=1 | sp P34955 A1AT_Bk | ISISE<br>TYDL | 85% | 41.7 | 52.81229 | Ref | 0.5  | 0.28  | 0.39 | 0.43 | 0.1   | 0.51 | -0    | 670   | 761   | 709   | 859   | 977   | 680   | 942   | 655   | 593   | 1776 | 3 | 0.0084 | 4.733 |
| Alpha-1-antiproteinase<br>OS=Bos taurus<br>GN=SERPINA1 PE=1<br>SV=1 | sp P34955 A1AT_Bk | ISISE<br>TYDL | 90% | 45.5 | 52.8583  | Ref | 0.29 | 0.39  | 0.43 | 0.3  | 0.027 | 0.76 | 0.15  | 645   | 741   | 860   | 989   | 1000  | 722   | 1250  | 813   | 593   | 1776 | 3 | 0.0112 | 6.287 |
| Alpha-1-antiproteinase<br>OS=Bos taurus<br>GN=SERPINA1 PE=1<br>SV=1 | sp P34955 A1AT_Bk | IVDT<br>FLED  | 86% | 40.3 | 52.50993 | Ref | 0.62 | 0.028 | 0.44 | 0.31 | -0.21 | 0.88 | 0.079 | 24200 | 34700 | 24900 | 37200 | 37600 | 22800 | 50800 | 28900 | 894   | 1786 | 2 | 0.0143 | 7.979 |
| Alpha-1-antiproteinase<br>OS=Bos taurus<br>GN=SERPINA1 PE=1<br>SV=1 | sp P34955 A1AT_Bk | IVDT<br>FLED  | 90% | 44.3 | 52.37931 | Ref | 0.38 | 0.056 | 0.57 | 0.16 | -0.29 | 0.75 | 0.48  | 41900 | 46300 | 40200 | 64500 | 53300 | 34100 | 73100 | 60400 | 596.3 | 1786 | 3 | 0.0118 | 6.589 |
| Alpha-1-antiproteinase<br>OS=Bos taurus<br>GN=SERPINA1 PE=1<br>SV=1 | sp P34955 A1AT_Bk | IVDT<br>FLED  | 89% | 44.2 | 52.82493 | Ref | 0.62 | 0.027 | 0.3  | 0.37 | -0.34 | 0.65 | 0.4   | 2620  | 3200  | 2300  | 3120  | 3620  | 1930  | 4000  | 3340  | 596.3 | 1786 | 3 | 0.0261 | 14.58 |
| Alpha-1-antiproteinase<br>OS=Bos taurus<br>GN=SERPINA1 PE=1<br>SV=1 | sp P34955 A1AT_Bk | IVDT<br>FLED  | 95% | 52   | 52.5099  | Ref | 0.51 | 0.17  | 0.44 | 0.27 | -0.16 | 0.85 | 0.059 | 3620  | 4490  | 3840  | 5220  | 5100  | 3310  | 6920  | 3980  | 894   | 1786 | 2 | 0.0171 | 9.546 |

|                                                                     |                      |                    |     |      |          |     |      |       |      |       |       |      |       |      |      |      |      |      |      |      |      |       |      |   |        |       |
|---------------------------------------------------------------------|----------------------|--------------------|-----|------|----------|-----|------|-------|------|-------|-------|------|-------|------|------|------|------|------|------|------|------|-------|------|---|--------|-------|
| Alpha-1-antiproteinase<br>OS=Bos taurus<br>GN=SERPINA1 PE=1<br>SV=1 | sp P34955 A1AT_BOVIN | IVDT<br>FLED<br>Vk | 95% | 51.3 | 52.39635 | Ref | 0.53 | 0.33  | 0.29 | 0.12  | -0.15 | 0.46 | 0.6   | 2300 | 2770 | 2620 | 2860 | 2800 | 2020 | 3220 | 3530 | 596.3 | 1786 | 3 | 0.0108 | 6.069 |
| Alpha-1-antiproteinase<br>OS=Bos taurus<br>GN=SERPINA1 PE=1<br>SV=1 | sp P34955 A1AT_BOVIN | IVDT<br>FLED<br>Vk | 86% | 41.7 | 52.26136 | Ref | 0.5  | 0.096 | 0.37 | 0.21  | -0.22 | 0.76 | 0.4   | 1320 | 1550 | 1270 | 1720 | 1690 | 1100 | 2270 | 1760 | 596.4 | 1786 | 3 | 0.005  | 2.795 |
| Alpha-1-antiproteinase<br>OS=Bos taurus<br>GN=SERPINA1 PE=1<br>SV=1 | sp P34955 A1AT_BOVIN | IVDT<br>FLED<br>Vk | 92% | 46.4 | 51.91962 | Ref | 0.55 | 0.22  | 0.37 | 0.028 | -0.09 | 0.76 | 0.35  | 804  | 1030 | 885  | 1100 | 956  | 770  | 1450 | 1080 | 596.4 | 1786 | 3 | 0.0023 | 1.301 |
| Alpha-1-antiproteinase<br>OS=Bos taurus<br>GN=SERPINA1 PE=1<br>SV=1 | sp P34955 A1AT_BOVIN | IVDT<br>FLED<br>Vk | 71% | 35.4 | 51.98621 | Ref | 0.66 | 0.3   | 0.28 | 0.11  | -0.1  | 0.56 | 0.28  | 545  | 665  | 563  | 623  | 609  | 460  | 757  | 619  | 596.4 | 1786 | 3 | #####  | 0.377 |
| Alpha-1-antiproteinase<br>OS=Bos taurus<br>GN=SERPINA1 PE=1<br>SV=1 | sp P34955 A1AT_BOVIN | IVDT<br>FLED<br>Vk | 90% | 42.8 | 52.51195 | Ref | 0.59 | 0.23  | 0.5  | 0.37  | -0.42 | 0.93 | 0.008 | 318  | 506  | 428  | 581  | 585  | 295  | 783  | 411  | 894   | 1786 | 2 | 0.0145 | 8.114 |
| Alpha-1-antiproteinase<br>OS=Bos taurus<br>GN=SERPINA1 PE=1<br>SV=1 | sp P34955 A1AT_BOVIN | IVDT<br>FLED<br>Vk | 74% | 36.6 | 52.32356 | Ref | 0.55 | -0.06 | 0.31 | 0.16  | 0.008 | 0.73 | 0.02  | 421  | 383  | 272  | 395  | 391  | 308  | 529  | 322  | 596.3 | 1786 | 3 | 0.0099 | 5.565 |

|                                                                     |                      |                           |     |      |          |     |      |       |      |        |                             |      |       |       |       |       |       |       |                             |       |       |       |      |   |        |       |
|---------------------------------------------------------------------|----------------------|---------------------------|-----|------|----------|-----|------|-------|------|--------|-----------------------------|------|-------|-------|-------|-------|-------|-------|-----------------------------|-------|-------|-------|------|---|--------|-------|
| Alpha-1-antiproteinase<br>OS=Bos taurus<br>GN=SERPINA1 PE=1<br>SV=1 | sp P34955 A1AT_BOVIN | IVDT<br>FLED<br>Vk        | 67% | 34.6 | 52.09684 | Ref | 0.44 | 0.27  | 0.45 | -0.009 | 0.085                       | 0.68 | 0.12  | 432   | 432   | 417   | 532   | 425   | 396                         | 627   | 420   | 596.4 | 1786 | 3 | #####  | 0.328 |
| Alpha-1-antiproteinase<br>OS=Bos taurus<br>GN=SERPINA1 PE=1<br>SV=1 | sp P34955 A1AT_BOVIN | IVDT<br>FLED<br>Vk        | 85% | 41.4 | 52.62017 | Ref | 0.21 | -0.01 | 0.59 | 0.28   | -0.16                       | 0.59 | 0.32  | 278   | 209   | 195   | 332   | 294   | 189                         | 334   | 274   | 596.3 | 1786 | 3 | 0.0237 | 13.24 |
| Alpha-1-antiproteinase<br>OS=Bos taurus<br>GN=SERPINA1 PE=1<br>SV=1 | sp P34955 A1AT_BOVIN | nLYH<br>SEAF<br>SINF<br>R | 81% | 39.5 | 52.87137 | Ref | 0.78 | 0.1   | 0.46 | 0.13   | -0.3                        | 0.75 | 0.075 | 21000 | 29700 | 20100 | 28900 | 25300 | 16400                       | 35500 | 22100 | 634.7 | 1901 | 3 | 0.0143 | 7.536 |
| Alpha-1-antiproteinase<br>OS=Bos taurus<br>GN=SERPINA1 PE=1<br>SV=1 | sp P34955 A1AT_BOVIN | nLYH<br>SEAF<br>SINF<br>R | 57% | 33.3 | 52.74359 | Ref | 0.75 | -0.23 | 0.6  | 0.19   | -0.09                       | 0.39 | 0.098 | 4720  | 5120  | 2820  | 5640  | 4660  | 3360                        | 4900  | 3970  | 634.7 | 1901 | 3 | 0.018  | 9.46  |
| Alpha-1-antiproteinase<br>OS=Bos taurus<br>GN=SERPINA1 PE=1<br>SV=1 | sp P34955 A1AT_BOVIN | nLYH<br>SEAF<br>SINF<br>R | 94% | 46.3 | 52.85874 | Ref | 0.44 | -0.03 | 0.74 | 0.23   | 0.048                       | 0.69 | 0.1   | 3970  | 4870  | 3810  | 7310  | 5640  | 4350                        | 7070  | 4680  | 951.5 | 1901 | 2 | 0.0128 | 6.728 |
| Alpha-1-antiproteinase<br>OS=Bos taurus<br>GN=SERPINA1 PE=1<br>SV=1 | sp P34955 A1AT_BOVIN | nLYH<br>SEAF<br>SINF<br>R | 75% | 37.6 | 53.08389 | Ref | 0.7  | 0.036 | 0.58 | 0.16   | Value Missing (-0.21525963) | 0.73 | 0.14  | 47000 | 68300 | 46800 | 76500 | 63000 | Value Missing (-0.21525963) | 85300 | 56300 | 634.7 | 1901 | 3 | 0.0021 | 1.085 |

|                                                                     |                      |                           |     |      |          |     |        |       |      |      |                             |      |       |       |       |       |       |       |                             |       |       |       |      |   |        |       |
|---------------------------------------------------------------------|----------------------|---------------------------|-----|------|----------|-----|--------|-------|------|------|-----------------------------|------|-------|-------|-------|-------|-------|-------|-----------------------------|-------|-------|-------|------|---|--------|-------|
| Alpha-1-antiproteinase<br>OS=Bos taurus<br>GN=SERPINA1 PE=1<br>SV=1 | sp P34955 A1AT_BOVIN | nLYH<br>SEAF<br>SINF<br>R | 89% | 44   | 52.85089 | Ref | 0.53   | 0.1   | 0.44 | 0.19 | 0.12                        | 0.6  | 0.24  | 2760  | 3240  | 2610  | 3700  | 3430  | 2870                        | 4160  | 3210  | 634.7 | 1901 | 3 | 0.0127 | 6.668 |
| Alpha-1-antiproteinase<br>OS=Bos taurus<br>GN=SERPINA1 PE=1<br>SV=1 | sp P34955 A1AT_BOVIN | nLYH<br>SEAF<br>SINF<br>R | 95% | 54.8 | 52.9477  | Ref | 0.66   | 0.089 | 0.43 | 0.19 | Value Missing (-0.10983529) | 0.77 | 0.099 | 17300 | 23200 | 17000 | 24100 | 22500 | Value Missing (-0.10983529) | 30800 | 19100 | 634.7 | 1901 | 3 | 0.0094 | 4.933 |
| Alpha-1-antiproteinase<br>OS=Bos taurus<br>GN=SERPINA1 PE=1<br>SV=1 | sp P34955 A1AT_BOVIN | nLYH<br>SEAF<br>SINF<br>R | 95% | 59.1 | 52.97408 | Ref | 0.62   | 0.051 | 0.57 | 0.23 | -0.17                       | 0.82 | -0.03 | 2520  | 3380  | 2480  | 3980  | 3460  | 2290                        | 4770  | 2610  | 951.5 | 1901 | 2 | 0.0085 | 4.478 |
| Alpha-1-antiproteinase<br>OS=Bos taurus<br>GN=SERPINA1 PE=1<br>SV=1 | sp P34955 A1AT_BOVIN | nLYH<br>SEAF<br>SINF<br>R | 88% | 43.6 | 52.95875 | Ref | 0.55   | 0.25  | 0.28 | 0.12 | 0.18                        | 0.47 | 0.25  | 2720  | 2900  | 2560  | 2940  | 2890  | 2640                        | 3370  | 2870  | 634.7 | 1901 | 3 | 0.0083 | 4.365 |
| Alpha-1-antiproteinase<br>OS=Bos taurus<br>GN=SERPINA1 PE=1<br>SV=1 | sp P34955 A1AT_BOVIN | nLYH<br>SEAF<br>SINF<br>R | 65% | 33.1 | 53.00852 | Ref | -0.012 | 0.71  | 0.21 | 0.11 | -0.18                       | 0.34 | 0.68  | 4070  | 2840  | 5090  | 4020  | 4150  | 2960                        | 4440  | 5570  | 476.2 | 1901 | 4 | 0.007  | 3.664 |
| Alpha-1-antiproteinase<br>OS=Bos taurus<br>GN=SERPINA1 PE=1<br>SV=1 | sp P34955 A1AT_BOVIN | nLYH<br>SEAF<br>SINF<br>R | 60% | 34   | 52.95684 | Ref | 0.28   | 0.28  | 0.44 | 0.23 | 0.28                        | 0.12 | 0.54  | 1190  | 1090  | 1190  | 1490  | 1420  | 1280                        | 1200  | 1590  | 634.7 | 1901 | 3 | 0.0081 | 4.255 |

|                                                                     |                      |                  |     |      |          |     |                               |                                |                               |                                |                          |                                |                                |                         |                               |                                |                               |                                |                          |                                |                                |       |        |   |        |       |
|---------------------------------------------------------------------|----------------------|------------------|-----|------|----------|-----|-------------------------------|--------------------------------|-------------------------------|--------------------------------|--------------------------|--------------------------------|--------------------------------|-------------------------|-------------------------------|--------------------------------|-------------------------------|--------------------------------|--------------------------|--------------------------------|--------------------------------|-------|--------|---|--------|-------|
| Alpha-1-antiproteinase<br>OS=Bos taurus<br>GN=SERPINA1 PE=1<br>SV=1 | sp P34955 A1AT_BOVIN | nLYH SEAF SINF R | 83% | 40.5 | 53.14101 | Ref | Reference Missing (0.4888076) | Reference Missing (0.16716973) | Reference Missing (0.5435641) | Reference Missing (0.15380296) | No Values (-0.121602334) | Reference Missing (0.84506625) | Reference Missing (0.14607329) | No Values (-0.09509742) | Reference Missing (0.4888076) | Reference Missing (0.16716973) | Reference Missing (0.5435641) | Reference Missing (0.15380296) | No Values (-0.121602334) | Reference Missing (0.84506625) | Reference Missing (0.14607329) | 634.7 | 1901   | 3 | #####  | 0.367 |
| Alpha-1-antiproteinase<br>OS=Bos taurus<br>GN=SERPINA1 PE=1<br>SV=1 | sp P34955 A1AT_BOVIN | nLYH SEAF SINF R | 71% | 36.4 | 52.95684 | Ref | 0.62                          | 0.31                           | 0.4                           | 0.38                           | 0.098                    | 0.43                           | 0.27                           | 291                     | 472                           | 412                            | 492                           | 537                            | 385                      | 507                            | 450                            | 634.7 | 1901   | 3 | 0.0081 | 4.255 |
| Alpha-1-antiproteinase<br>OS=Bos taurus<br>GN=SERPINA1 PE=1<br>SV=1 | sp P34955 A1AT_BOVIN | nLYH SEAF SINF R | 53% | 32.9 | 52.98731 | Ref | 0.6                           | 0.1                            | 0.24                          | 0.4                            | -0.09                    | 0.62                           | 0.23                           | 458                     | 547                           | 420                            | 519                           | 639                            | 395                      | 678                            | 513                            | 634.7 | 1901   | 3 | 0.0087 | 4.555 |
| Alpha-1-antiproteinase<br>OS=Bos taurus<br>GN=SERPINA1 PE=1<br>SV=1 | sp P34955 A1AT_BOVIN | nLyH SEAF SINF R | 73% | 36.4 | 54.38919 | Ref | 0.6                           | 0.14                           | 0.58                          | 0.29                           | -0.2                     | 0.59                           | 0.11                           | 5910                    | 7300                          | 5750                           | 8790                          | 7930                           | 4910                     | 8870                           | 6320                           | 552.3 | 2205.2 | 4 | 0.0141 | 6.369 |
| Alpha-1-antiproteinase<br>OS=Bos taurus<br>GN=SERPINA1 PE=1<br>SV=1 | sp P34955 A1AT_BOVIN | nLyH SEAF SINF R | 95% | 51.5 | 54.37319 | Ref | 0.57                          | 0.32                           | 0.51                          | 0.28                           | -0.06                    | 0.64                           | 0.12                           | 6600                    | 9610                          | 8810                           | 11300                         | 10600                          | 7270                     | 12300                          | 8590                           | 552.3 | 2205.2 | 4 | 0.0138 | 6.26  |
| Alpha-1-antiproteinase<br>OS=Bos taurus<br>GN=SERPINA1 PE=1<br>SV=1 | sp P34955 A1AT_BOVIN | nLyH SEAF SINF R | 85% | 41   | 54.38477 | Ref | 0.64                          | 0.068                          | 0.65                          | 0.17                           | -0.14                    | 0.61                           | 0.11                           | 50400                   | 66100                         | 48200                          | 80800                         | 64200                          | 45200                    | 79200                          | 55700                          | 552.3 | 2205.2 | 4 | 0.0133 | 6.024 |

|                                                                     |                      |                           |     |      |          |     |      |       |      |      |       |      |       |       |        |       |        |        |       |       |       |       |        |   |        |       |
|---------------------------------------------------------------------|----------------------|---------------------------|-----|------|----------|-----|------|-------|------|------|-------|------|-------|-------|--------|-------|--------|--------|-------|-------|-------|-------|--------|---|--------|-------|
| Alpha-1-antiproteinase<br>OS=Bos taurus<br>GN=SERPINA1 PE=1<br>SV=1 | sp P34955 A1AT_BOVIN | nLyH<br>SEAF<br>SINF<br>R | 95% | 56.4 | 54.37492 | Ref | 0.47 | 0.14  | 0.52 | 0.27 | -0.14 | 0.84 | -0.04 | 1330  | 1520   | 1310  | 1910   | 1780   | 1170  | 2400  | 1300  | 1104  | 2205.2 | 2 | 0.0034 | 1.541 |
| Alpha-1-antiproteinase<br>OS=Bos taurus<br>GN=SERPINA1 PE=1<br>SV=1 | sp P34955 A1AT_BOVIN | nLyH<br>SEAF<br>SINF<br>R | 68% | 35.2 | 54.38998 | Ref | 0.46 | 0.14  | 0.38 | 0.19 | 0.21  | 0.54 | 0.3   | 2820  | 3090   | 2680  | 3550   | 3440   | 3040  | 4000  | 3360  | 552.3 | 2205.2 | 4 | 0.0128 | 5.807 |
| Alpha-1-antiproteinase<br>OS=Bos taurus<br>GN=SERPINA1 PE=1<br>SV=1 | sp P34955 A1AT_BOVIN | nLyH<br>SEAF<br>SINF<br>R | 72% | 36.2 | 54.3893  | Ref | 0.54 | 0.001 | 0.55 | 0.29 | -0.03 | 0.68 | 0.11  | 4160  | 4970   | 3720  | 6110   | 5610   | 3940  | 6700  | 4490  | 552.3 | 2205.2 | 4 | 0.0119 | 5.372 |
| Alpha-1-antiproteinase<br>OS=Bos taurus<br>GN=SERPINA1 PE=1<br>SV=1 | sp P34955 A1AT_BOVIN | nLyH<br>SEAF<br>SINF<br>R | 86% | 41.3 | 54.37273 | Ref | 0.67 | -0.07 | 0.51 | 0.25 | -0.15 | 0.93 | 0.035 | 73700 | 117000 | 75800 | 127000 | 117000 | 77700 | 2E+05 | 91300 | 552.3 | 2205.2 | 4 | 0.0116 | 5.263 |
| Alpha-1-antiproteinase<br>OS=Bos taurus<br>GN=SERPINA1 PE=1<br>SV=1 | sp P34955 A1AT_BOVIN | nLyH<br>SEAF<br>SINF<br>R | 95% | 55.9 | 54.38968 | Ref | 0.53 | 0.006 | 0.66 | 0.2  | -0.33 | 0.82 | 0.13  | 6110  | 7520   | 5670  | 9990   | 8020   | 4870  | 11200 | 6930  | 552.3 | 2205.2 | 4 | 0.005  | 2.271 |
| Alpha-1-antiproteinase<br>OS=Bos taurus<br>GN=SERPINA1 PE=1<br>SV=1 | sp P34955 A1AT_BOVIN | nLyH<br>SEAF<br>SINF<br>R | 84% | 40.5 | 54.3647  | Ref | 0.55 | 0.13  | 0.43 | 0.26 | -0.07 | 0.72 | 0.18  | 1460  | 1850   | 1500  | 2070   | 2040   | 1410  | 2550  | 1740  | 552.3 | 2205.2 | 4 | 0.0131 | 5.916 |

|                                                                         |                              |                           |     |      |          |     |      |       |      |       |       |      |       |      |      |      |      |      |      |      |      |       |        |   |        |       |
|-------------------------------------------------------------------------|------------------------------|---------------------------|-----|------|----------|-----|------|-------|------|-------|-------|------|-------|------|------|------|------|------|------|------|------|-------|--------|---|--------|-------|
| Alpha-1-<br>antiproteinase<br>OS=Bos taurus<br>GN=SERPINA1 PE=1<br>SV=1 | sp P3495<br>5 A1AT_B<br>OVIN | nLyH<br>SEAF<br>SINF<br>R | 73% | 36.6 | 54.41387 | Ref | 0.52 | 0.33  | 0.35 | 0.39  | -0.11 | 0.73 | -0.07 | 2790 | 3340 | 3160 | 3620 | 4100 | 2530 | 4720 | 2690 | 552.3 | 2205.2 | 4 | 0.0075 | 3.377 |
| Alpha-1-<br>antiproteinase<br>OS=Bos taurus<br>GN=SERPINA1 PE=1<br>SV=1 | sp P3495<br>5 A1AT_B<br>OVIN | nLyH<br>SEAF<br>SINF<br>R | 95% | 50   | 54.38968 | Ref | 0.51 | 0.096 | 0.35 | 0.23  | 0.076 | 0.69 | 0.18  | 949  | 1050 | 857  | 1150 | 1160 | 913  | 1460 | 1020 | 552.3 | 2205.2 | 4 | 0.005  | 2.271 |
| Alpha-1-<br>antiproteinase<br>OS=Bos taurus<br>GN=SERPINA1 PE=1<br>SV=1 | sp P3495<br>5 A1AT_B<br>OVIN | nLyH<br>SEAF<br>SINF<br>R | 76% | 37.3 | 54.3647  | Ref | 0.5  | 0.12  | 0.36 | 0.38  | -0.01 | 0.65 | 0.29  | 953  | 1180 | 981  | 1310 | 1460 | 972  | 1600 | 1240 | 552.3 | 2205.2 | 4 | 0.0131 | 5.916 |
| Alpha-1-<br>antiproteinase<br>OS=Bos taurus<br>GN=SERPINA1 PE=1<br>SV=1 | sp P3495<br>5 A1AT_B<br>OVIN | nLYH<br>SEAF<br>SInF<br>R | 93% | 48.7 | 52.38056 | Ref | 0.51 | 0.53  | 0.36 | 0.018 | -0.49 | 0.74 | -0.15 | 6710 | 5900 | 6510 | 6470 | 5630 | 3460 | 8460 | 4540 | 635   | 1901.9 | 3 | 0.0118 | 6.181 |
| Alpha-1-<br>antiproteinase<br>OS=Bos taurus<br>GN=SERPINA1 PE=1<br>SV=1 | sp P3495<br>5 A1AT_B<br>OVIN | nLYH<br>SEAF<br>SInF<br>R | 94% | 49.3 | 52.49609 | Ref | 0.48 | 0.36  | 0.68 | 0.2   | -0.11 | 0.79 | -0.04 | 1930 | 2950 | 2950 | 4130 | 3250 | 2300 | 4480 | 2500 | 635   | 1901.9 | 3 | 0.0105 | 5.503 |
| Alpha-1-<br>antiproteinase<br>OS=Bos taurus<br>GN=SERPINA1 PE=1<br>SV=1 | sp P3495<br>5 A1AT_B<br>OVIN | nLYH<br>SEAF<br>SInF<br>R | 88% | 41.4 | 52.55118 | Ref | 0.42 | 0.18  | 0.45 | 0.18  | 0.12  | 0.79 | 0.31  | 389  | 545  | 500  | 676  | 615  | 516  | 859  | 610  | 952   | 1901.9 | 2 | 0.0086 | 4.543 |



|                                                                     |                      |                             |     |      |          |     |                         |                          |                           |                           |                           |                           |                           |                           |                         |                          |                           |                           |                           |                           |                           |       |        |   |        |       |
|---------------------------------------------------------------------|----------------------|-----------------------------|-----|------|----------|-----|-------------------------|--------------------------|---------------------------|---------------------------|---------------------------|---------------------------|---------------------------|---------------------------|-------------------------|--------------------------|---------------------------|---------------------------|---------------------------|---------------------------|---------------------------|-------|--------|---|--------|-------|
| Alpha-1-antiproteinase<br>OS=Bos taurus<br>GN=SERPINA1 PE=1<br>SV=1 | sp P34955 A1AT_BOVIN | nLyH<br>SEAF<br>SinF<br>R   | 53% | 32.4 | 54.27721 | Ref | 0.33                    | 0.14                     | 0.49                      | 0.23                      | 0.13                      | 0.48                      | 0.43                      | 13500                     | 13700                   | 13000                    | 18600                     | 17100                     | 14000                     | 18600                     | 17800                     | 552.5 | 2206.1 | 4 | 0.0162 | 7.35  |
| Alpha-1-antiproteinase<br>OS=Bos taurus<br>GN=SERPINA1 PE=1<br>SV=1 | sp P34955 A1AT_BOVIN | sPLF<br>VGK                 | 65% | 30.6 | 48.86338 | Ref | 0.48                    | 0.035                    | 0.33                      | 0.37                      | 0.054                     | 0.66                      | 0.29                      | 73900                     | 85300                   | 68000                    | 93800                     | 106000                    | 74400                     | 1E+05                     | 90700                     | 678.4 | 1354.8 | 2 | 0.0061 | 4.49  |
| Alpha-1-antiproteinase<br>OS=Bos taurus<br>GN=SERPINA1 PE=1<br>SV=1 | sp P34955 A1AT_BOVIN | sPLF<br>VGK                 | 80% | 35.2 | 49.86005 | Ref | 0.5                     | -0.04                    | 0.48                      | 0.37                      | -0.11                     | 0.84                      | 0.13                      | 2E+05                     | 294000                  | 2E+05                    | 352000                    | 360000                    | 2E+05                     | 5E+05                     | 276000                    | 678.4 | 1354.8 | 2 | 0.0138 | 10.15 |
| Alpha-1-antiproteinase<br>OS=Bos taurus<br>GN=SERPINA1 PE=1<br>SV=1 | sp P34955 A1AT_BOVIN | sPLF<br>VGK                 | 54% | 28.7 | 48.82695 | Ref | 0.46                    | 0.15                     | 0.48                      | 0.29                      | 0.14                      | 0.67                      | 0.2                       | 12700                     | 16500                   | 14500                    | 20400                     | 19700                     | 15500                     | 23500                     | 16800                     | 678.4 | 1354.8 | 2 | 0.0034 | 2.499 |
| Alpha-1-antiproteinase<br>OS=Bos taurus<br>GN=SERPINA1 PE=1<br>SV=1 | sp P34955 A1AT_BOVIN | sVLG<br>DVGI<br>TEVF<br>SDR | 95% | 65.3 | 53.4818  | Ref | No Values<br>(0.524694) | No Values<br>(0.4070006) | No Values<br>(0.24040572) | No Values<br>(0.09992675) | No Values<br>(0.29579893) | No Values<br>(0.23303242) | No Values<br>(0.24390642) | No Values<br>(0.32230407) | No Values<br>(0.524694) | No Values<br>(0.4070006) | No Values<br>(0.24040572) | No Values<br>(0.09992675) | No Values<br>(0.29579893) | No Values<br>(0.23303242) | No Values<br>(0.24390642) | 633.3 | 1897   | 3 | 0.0138 | 7.286 |
| Alpha-1-antiproteinase<br>OS=Bos taurus<br>GN=SERPINA1 PE=1<br>SV=1 | sp P34955 A1AT_BOVIN | sVLG<br>DVGI<br>TEVF<br>SDR | 95% | 53.7 | 53.49462 | Ref | 0.54                    | 0.096                    | 0.37                      | 0.43                      | -0.06                     | 0.73                      | 0.12                      | 5110                      | 6540                    | 5200                     | 7060                      | 8140                      | 5030                      | 9090                      | 5940                      | 949.5 | 1897   | 2 | 0.0137 | 7.194 |

|                                                                     |                      |                             |     |      |          |     |      |       |      |        |       |      |       |       |       |       |       |       |       |       |       |       |      |   |        |       |
|---------------------------------------------------------------------|----------------------|-----------------------------|-----|------|----------|-----|------|-------|------|--------|-------|------|-------|-------|-------|-------|-------|-------|-------|-------|-------|-------|------|---|--------|-------|
| Alpha-1-antiproteinase<br>OS=Bos taurus<br>GN=SERPINA1 PE=1<br>SV=1 | sp P34955 A1AT_BOVIN | sVLG<br>DVGI<br>TEVF<br>SDR | 95% | 49.6 | 53.5093  | Ref | 0.55 | 0.16  | 0.2  | 0.29   | -0    | 0.94 | -0.02 | 33200 | 42000 | 34900 | 40300 | 47300 | 33600 | 67300 | 34500 | 949.5 | 1897 | 2 | 0.0117 | 6.161 |
| Alpha-1-antiproteinase<br>OS=Bos taurus<br>GN=SERPINA1 PE=1<br>SV=1 | sp P34955 A1AT_BOVIN | sVLG<br>DVGI<br>TEVF<br>SDR | 87% | 41.7 | 53.49462 | Ref | 0.67 | 0.12  | 0.16 | 0.36   | -0.02 | 0.8  | 0.31  | 2670  | 4580  | 3390  | 3920  | 4950  | 3330  | 6100  | 4320  | 949.5 | 1897 | 2 | 0.0137 | 7.194 |
| Alpha-1-antiproteinase<br>OS=Bos taurus<br>GN=SERPINA1 PE=1<br>SV=1 | sp P34955 A1AT_BOVIN | sVLG<br>DVGI<br>TEVF<br>SDR | 95% | 56.1 | 53.57792 | Ref | 0.36 | 0.34  | 0.37 | -0.014 | -0.37 | 0.73 | 0.36  | 1240  | 1060  | 1130  | 1290  | 1090  | 746   | 1670  | 1280  | 633.3 | 1897 | 3 | 0.0109 | 5.753 |
| Alpha-1-antiproteinase<br>OS=Bos taurus<br>GN=SERPINA1 PE=1<br>SV=1 | sp P34955 A1AT_BOVIN | sVLG<br>DVGI<br>TEVF<br>SDR | 94% | 50.6 | 53.58662 | Ref | 0.79 | 0.042 | 0.63 | -0.027 | -0.31 | 0.9  | 0.072 | 1340  | 2370  | 1530  | 2580  | 1810  | 1290  | 3120  | 1750  | 633.3 | 1897 | 3 | 0.0089 | 4.694 |
| Alpha-1-antiproteinase<br>OS=Bos taurus<br>GN=SERPINA1 PE=1<br>SV=1 | sp P34955 A1AT_BOVIN | sVLG<br>DVGI<br>TEVF<br>SDR | 95% | 50.3 | 53.68151 | Ref | 0.58 | 0.15  | 0.45 | 0.46   | -0.06 | 0.72 | 0.065 | 971   | 1460  | 1180  | 1630  | 1810  | 1100  | 1970  | 1240  | 949.5 | 1897 | 2 | 0.0056 | 2.975 |
| Alpha-1-antiproteinase<br>OS=Bos taurus<br>GN=SERPINA1 PE=1<br>SV=1 | sp P34955 A1AT_BOVIN | sVLG<br>DVGI<br>TEVF<br>SDR | 95% | 71.4 | 53.5905  | Ref | 0.51 | 0.11  | 0.46 | 0.47   | -0.08 | 0.78 | 0.15  | 2520  | 3850  | 3150  | 4510  | 5000  | 2980  | 5670  | 3640  | 949.5 | 1897 | 2 | 0.0088 | 4.623 |

|                                                                     |                      |                                   |     |      |          |     |      |       |      |      |       |      |      |     |     |     |     |     |     |      |     |       |        |   |        |       |
|---------------------------------------------------------------------|----------------------|-----------------------------------|-----|------|----------|-----|------|-------|------|------|-------|------|------|-----|-----|-----|-----|-----|-----|------|-----|-------|--------|---|--------|-------|
| Alpha-1-antiproteinase<br>OS=Bos taurus<br>GN=SERPINA1 PE=1<br>SV=1 | sp P34955 A1AT_BOVIN | sVLG<br>DVGI<br>TEVF<br>SDR       | 95% | 63.9 | 53.57367 | Ref | 0.6  | 0.4   | 0.27 | 0.22 | -0.12 | 0.46 | 0.37 | 735 | 916 | 865 | 890 | 948 | 652 | 1020 | 949 | 633.3 | 1897   | 3 | 0.0073 | 3.825 |
| Alpha-1-antiproteinase<br>OS=Bos taurus<br>GN=SERPINA1 PE=1<br>SV=1 | sp P34955 A1AT_BOVIN | sVLG<br>DVGI<br>TEVF<br>SDR       | 95% | 63.9 | 53.60754 | Ref | 0.44 | 0.4   | 0.13 | 0.19 | 0.31  | 0.58 | 0.16 | 391 | 416 | 440 | 410 | 471 | 446 | 564  | 418 | 633.3 | 1897   | 3 | 0.0093 | 4.884 |
| Alpha-1-antiproteinase<br>OS=Bos taurus<br>GN=SERPINA1 PE=1<br>SV=1 | sp P34955 A1AT_BOVIN | sVLG<br>DVGI<br>TEVF<br>SDR       | 94% | 47.4 | 53.56684 | Ref | 0.55 | 0.18  | 0.37 | 0.5  | -0.06 | 0.75 | 0.22 | 445 | 751 | 630 | 807 | 978 | 576 | 1050 | 727 | 949.5 | 1897   | 2 | 0.0082 | 4.296 |
| Alpha-1-antiproteinase<br>OS=Bos taurus<br>GN=SERPINA1 PE=1<br>SV=1 | sp P34955 A1AT_BOVIN | sVLG<br>DVGI<br>TEVF<br>SDR       | 95% | 52   | 53.62209 | Ref | 0.61 | 0.31  | 0.4  | 0.22 | -0.06 | 0.86 | 0.2  | 326 | 618 | 547 | 651 | 634 | 456 | 901  | 566 | 949.5 | 1897   | 2 | 0.0055 | 2.884 |
| Alpha-1-antiproteinase<br>OS=Bos taurus<br>GN=SERPINA1 PE=1<br>SV=1 | sp P34955 A1AT_BOVIN | vLDP<br>NTVF<br>ALV<br>NYIS<br>Fk | 95% | 61.2 | 53.52725 | Ref | 0.55 | 0.13  | 0.46 | 0.34 | -0.31 | 0.81 | 0.31 | 573 | 843 | 683 | 962 | 980 | 546 | 1230 | 865 | 850.2 | 2547.5 | 3 | #####  | 0.117 |
| Alpha-1-antiproteinase<br>OS=Bos taurus<br>GN=SERPINA1 PE=1<br>SV=1 | sp P34955 A1AT_BOVIN | vLDP<br>NTVF<br>ALV<br>NYIS<br>Fk | 58% | 32.9 | 54.01922 | Ref | 0.52 | -0.16 | 0.47 | 0.26 | -0.27 | 0.88 | 0.4  | 423 | 546 | 370 | 645 | 616 | 373 | 860  | 611 | 637.9 | 2547.4 | 4 | 0.0153 | 5.994 |

|                                                                     |                      |                                   |     |      |          |     |                                |                        |                               |                               |                              |                               |                                |                        |                                |                        |                               |                               |                               |                               |                                |       |        |   |        |       |
|---------------------------------------------------------------------|----------------------|-----------------------------------|-----|------|----------|-----|--------------------------------|------------------------|-------------------------------|-------------------------------|------------------------------|-------------------------------|--------------------------------|------------------------|--------------------------------|------------------------|-------------------------------|-------------------------------|-------------------------------|-------------------------------|--------------------------------|-------|--------|---|--------|-------|
| Alpha-1-antiproteinase<br>OS=Bos taurus<br>GN=SERPINA1 PE=1<br>SV=1 | sp P34955 A1AT_BOVIN | vLDP<br>NTVF<br>ALV<br>NYIS<br>Fk | 95% | 63.7 | 53.64153 | Ref | 0.41                           | 0.02                   | 0.42                          | 0.31                          | -0.24                        | 0.89                          | 0.44                           | 1690                   | 2210                           | 1830                   | 2710                          | 2770                          | 1650                          | 3770                          | 2740                           | 850.2 | 2547.5 | 3 | 0.0038 | 1.483 |
| Alpha-1-antiproteinase<br>OS=Bos taurus<br>GN=SERPINA1 PE=1<br>SV=1 | sp P34955 A1AT_BOVIN | vLDP<br>NTVF<br>ALV<br>NYIS<br>Fk | 95% | 56.9 | 53.93358 | Ref | Reference Missing (0.73411065) | No Values (-1.3572731) | Reference Missing (0.4416717) | No Values (-1.664347)         | Reference Missing (0.546101) | Reference Missing (1.5444213) | Reference Missing (0.46680635) | No Values (-1.4419696) | Reference Missing (0.73411065) | No Values (-1.3572731) | Reference Missing (0.4416717) | No Values (-1.664347)         | Reference Missing (0.5466101) | Reference Missing (1.5444213) | Reference Missing (0.46680635) | 850.2 | 2547.4 | 3 | 0.0127 | 5.003 |
| Alpha-1-antiproteinase<br>OS=Bos taurus<br>GN=SERPINA1 PE=1<br>SV=1 | sp P34955 A1AT_BOVIN | vLDP<br>NTVF<br>ALV<br>NYIS<br>Fk | 89% | 45.7 | 54.01922 | Ref | Reference Missing (1.0242769)  | No Values (-1.4910004) | Reference Missing (0.6131763) | Reference Missing (1.0058495) | No Values (-1.60202)         | Reference Missing (0.8944484) | Reference Missing (0.4893156)  | No Values (-1.5756971) | Reference Missing (1.0242769)  | No Values (-1.4910004) | Reference Missing (0.6131763) | Reference Missing (1.0058495) | No Values (-1.60202)          | Reference Missing (0.8944484) | Reference Missing (0.46893156) | 850.2 | 2547.4 | 3 | 0.0153 | 6.003 |
| Alpha-1-antiproteinase<br>OS=Bos taurus<br>GN=SERPINA1 PE=1<br>SV=1 | sp P34955 A1AT_BOVIN | vLDP<br>NTVF<br>ALV<br>NYIS<br>Fk | 77% | 36.2 | 52.9219  | Ref | 0.62                           | 0.16                   | 0.6                           | 0.032                         | -0.2                         | 0.85                          | -0.17                          | 223                    | 271                            | 214                    | 326                           | 242                           | 181                           | 389                           | 191                            | 713.9 | 2851.6 | 4 | 0.0128 | 4.5   |
| Alpha-1-antiproteinase<br>OS=Bos taurus<br>GN=SERPINA1 PE=1<br>SV=1 | sp P34955 A1AT_BOVIN | vVN<br>PTQ<br>A                   | 78% | 35.4 | 50.72779 | Ref | 1                              | 0.19                   | 0.18                          | 0.17                          | -0.46                        | 0.8                           | 0.19                           | 359                    | 830                            | 499                    | 556                           | 608                           | 343                           | 857                           | 558                            | 516.8 | 1031.6 | 2 | 0.0086 | 8.309 |
| Alpha-1-antiproteinase<br>OS=Bos taurus<br>GN=SERPINA1 PE=1<br>SV=1 | sp P34955 A1AT_BOVIN | yASS<br>ANL<br>HLpk               | 84% | 40.8 | 52.53992 | Ref | 0.57                           | -0.03                  | 0.48                          | 0.32                          | -0.07                        | 0.86                          | 0.068                          | 55000                  | 76500                          | 54800                  | 87700                         | 86400                         | 57400                         | 1E+05                         | 65600                          | 603.7 | 1808   | 3 | 0.0142 | 7.853 |

|                                                                           |                                                                                                                                                                                                                               |                        |     |      |          |     |       |       |       |       |       |       |       |       |       |       |       |       |       |       |       |       |        |   |        |       |
|---------------------------------------------------------------------------|-------------------------------------------------------------------------------------------------------------------------------------------------------------------------------------------------------------------------------|------------------------|-----|------|----------|-----|-------|-------|-------|-------|-------|-------|-------|-------|-------|-------|-------|-------|-------|-------|-------|-------|--------|---|--------|-------|
| Alpha-1-antiproteinase<br>OS=Bos taurus<br>GN=SERPINA1 PE=1<br>SV=1       | sp P34955 A1AT_BOVIN                                                                                                                                                                                                          | yASS ANL<br>HLPk       | 86% | 40.4 | 52.51042 | Ref | 0.54  | 0.089 | 0.5   | 0.26  | 0.14  | 0.6   | 0.1   | 2570  | 3140  | 2500  | 3740  | 3480  | 2790  | 4030  | 2830  | 905   | 1808   | 2 | 0.0113 | 6.264 |
| Alpha-1-antiproteinase<br>OS=Bos taurus<br>GN=SERPINA1 PE=1<br>SV=1       | sp P34955 A1AT_BOVIN                                                                                                                                                                                                          | yASS ANL<br>HLPk       | 50% | 29.5 | 51.90343 | Ref | 0.45  | 0.005 | 0.53  | 0.41  | -0.17 | 0.73  | 0.19  | 20400 | 23600 | 18900 | 30400 | 30900 | 18000 | 35300 | 24000 | 529.1 | 2112.2 | 4 | 0.0187 | 8.833 |
| Actin, cytoplasmic 2<br>OS=Trichosurus vulpecula<br>GN=ACTG1 PE=1<br>SV=1 | 7 ACTG_T<br>RIVU,sp P63258 ACTG_BOVIN,sp P63259 ACTG_RAT,sp P63260 ACTG_MOUSE,sp P63261 ACTG_HUMAN,tr D2I7P0 D2I7P0_AILME,tr F1PQL8 F1PQL8_CANFA,tr F6TII3 F6TII3_MACMU,tr F7AAK7 F7AAK7_HORSE,tr F7DIB7 F7DIB7_MONDO,tr F7I0 | aGF<br>AGD<br>DAP<br>R | 77% | 34.4 | 50.00078 | Ref | -0.64 | 0.21  | -0.54 | -0.16 | -0.23 | -0.42 | -0.17 | 8140  | 4280  | 8390  | 5620  | 8030  | 6690  | 6110  | 7220  | 640.8 | 1279.6 | 2 | 0.0114 | 8.939 |

|                                                                              |                                                                                                                                                                                                                                                                                                                                   |                        |     |      |          |     |       |       |       |       |       |       |       |       |         |       |       |         |       |       |         |       |        |   |        |       |
|------------------------------------------------------------------------------|-----------------------------------------------------------------------------------------------------------------------------------------------------------------------------------------------------------------------------------------------------------------------------------------------------------------------------------|------------------------|-----|------|----------|-----|-------|-------|-------|-------|-------|-------|-------|-------|---------|-------|-------|---------|-------|-------|---------|-------|--------|---|--------|-------|
| Actin, cytoplasmic 2<br>OS=Trichosurus<br>vulpecula<br>GN=ACTG1 PE=1<br>SV=1 | 7 ACTG_T<br>RIVU,sp P<br>63258 AC<br>TG_BOVI<br>N,sp P63<br>259 ACTG<br>_RAT,sp <br>P63260 A<br>CTG_MO<br>USE,sp P6<br>3261 ACT<br>G_HUMA<br>N,tr D2I7<br>P0 D2I7P<br>0_AILME,t<br>r F1PQL8<br> F1PQL8_<br>CANFA,tr <br>F6TII3 F6<br>TII3_MAC<br>MU,tr F7<br>AAK7 F7A<br>AK7_HOR<br>SE,tr F7DI<br>B7 F7DIB<br>7_MOND<br>O,tr F7I0 | aGF<br>AGD<br>DAP<br>R | 92% | 42.3 | 50.31627 | Ref | -0.57 | 0.14  | -0.56 | -0.16 | -0.14 | -0.35 | -0.23 | 2950  | 1650    | 2950  | 2040  | 2960    | 2610  | 2360  | 2550    | 640.8 | 1279.6 | 2 | 0.005  | 3.895 |
| Actin, cytoplasmic 2<br>OS=Trichosurus<br>vulpecula<br>GN=ACTG1 PE=1<br>SV=1 | 7 ACTG_T<br>RIVU,sp P<br>63258 AC<br>TG_BOVI<br>N,sp P63<br>259 ACTG<br>_RAT,sp <br>P63260 A<br>CTG_MO<br>USE,sp P6<br>3261 ACT<br>G_HUMA<br>N,tr D2I7<br>P0 D2I7P<br>0_AILME,t<br>r F1PQL8<br> F1PQL8_<br>CANFA,tr <br>F6TII3 F6<br>TII3_MAC<br>MU,tr F7<br>AAK7 F7A<br>AK7_HOR<br>SE,tr F7DI<br>B7 F7DIB<br>7_MOND<br>O,tr F7I0 | aGF<br>AGD<br>DAP<br>R | 78% | 34.6 | 50.01024 | Ref | -0.73 | 0.093 | -0.5  | -0.21 | -0.05 | -0.42 | -0.11 | 5E+06 | 2500000 | 5E+06 | 4E+06 | 4840000 | 5E+06 | 4E+06 | 4680000 | 640.8 | 1279.6 | 2 | 0.0118 | 9.221 |

|                      |                                                                                                                                                                                                                                                                                  |                        |     |      |          |     |                                         |                                       |                                        |                                       |       |                                        |                                       |       |                                         |                                       |                                        |                                       |       |                                        |                                       |       |        |   |        |       |
|----------------------|----------------------------------------------------------------------------------------------------------------------------------------------------------------------------------------------------------------------------------------------------------------------------------|------------------------|-----|------|----------|-----|-----------------------------------------|---------------------------------------|----------------------------------------|---------------------------------------|-------|----------------------------------------|---------------------------------------|-------|-----------------------------------------|---------------------------------------|----------------------------------------|---------------------------------------|-------|----------------------------------------|---------------------------------------|-------|--------|---|--------|-------|
| Actin, cytoplasmic 2 | 7 ACTG_T<br>RIVU,sp P<br>63258 AC<br>TG_BOVI<br>N,sp P63<br>259 ACTG<br>_RAT,sp <br>P63260 A<br>CTG_MO<br>USE,sp P6<br>3261 ACT<br>G_HUMA<br>N,tr D2I7<br>P0 D2I7P<br>0_AILME,t<br>r F1PQL8<br> F1PQL8_<br>CANFA,tr <br>F6TII3 F6<br>TII3_MAC<br>MU,tr F7<br>AAK7 F7A<br>AK7_HOR | aGF<br>AGD<br>DAP<br>R | 95% | 63.6 | 50.01807 | Ref | Value<br>Missing (-<br>0.1163<br>93514) | Value<br>Missing (-<br>0.234<br>0868) | Value<br>Missing (-<br>0.400<br>68176) | Value<br>Missing (-<br>0.5411<br>609) | 0.24  | Value<br>Missing (-<br>0.408<br>05507) | Value<br>Missing (-<br>0.3971<br>811) | 37900 | Value<br>Missing (-<br>0.116393<br>514) | Value<br>Missing (-<br>0.234<br>0868) | Value<br>Missing (-<br>0.4006<br>8176) | Value<br>Missing (-<br>0.541160<br>9) | 44300 | Value<br>Missing (-<br>0.4080<br>5507) | Value<br>Missing (-<br>0.397181<br>1) | 427.6 | 1279.6 | 3 | 0.0116 | 9.085 |
| Actin, cytoplasmic 2 | 7 ACTG_T<br>RIVU,sp P<br>63258 AC<br>TG_BOVI<br>N,sp P63<br>259 ACTG<br>_RAT,sp <br>P63260 A<br>CTG_MO<br>USE,sp P6<br>3261 ACT<br>G_HUMA<br>N,tr D2I7<br>P0 D2I7P<br>0_AILME,t<br>r F1PQL8<br> F1PQL8_<br>CANFA,tr <br>F6TII3 F6<br>TII3_MAC<br>MU,tr F7<br>AAK7 F7A<br>AK7_HOR | aGF<br>AGD<br>DAP<br>R | 58% | 30.4 | 49.98704 | Ref | -0.61                                   | 0.035                                 | -0.51                                  | -0.034                                | -0.18 | -0.18                                  | -0.26                                 | 40100 | 23500                                   | 39800                                 | 30600                                  | 46900                                 | 37000 | 38600                                  | 36400                                 | 640.8 | 1279.6 | 2 | 0.0129 | 10.08 |

|                                                                              |                                                                                                                                                                                                                                                                                                                                   |                        |     |      |          |     |       |       |       |       |       |       |       |       |       |       |       |       |       |       |       |       |        |   |        |       |
|------------------------------------------------------------------------------|-----------------------------------------------------------------------------------------------------------------------------------------------------------------------------------------------------------------------------------------------------------------------------------------------------------------------------------|------------------------|-----|------|----------|-----|-------|-------|-------|-------|-------|-------|-------|-------|-------|-------|-------|-------|-------|-------|-------|-------|--------|---|--------|-------|
| Actin, cytoplasmic 2<br>OS=Trichosurus<br>vulpecula<br>GN=ACTG1 PE=1<br>SV=1 | 7 ACTG_T<br>RIVU,sp P<br>63258 AC<br>TG_BOVI<br>N,sp P63<br>259 ACTG<br>_RAT,sp <br>P63260 A<br>CTG_MO<br>USE,sp P6<br>3261 ACT<br>G_HUMA<br>N,tr D2I7<br>P0 D2I7P<br>O_AILME,t<br>r F1PQL8<br> F1PQL8_<br>CANFA,tr <br>F6TII3 F6<br>TII3_MAC<br>MU,tr F7<br>AAK7 F7A<br>AK7_HOR<br>SE,tr F7DI<br>B7 F7DIB<br>7_MOND<br>O,tr F7I0 | aGF<br>AGD<br>DAP<br>R | 76% | 34.2 | 50.22734 | Ref | -0.57 | -0.02 | -0.6  | -0.07 | -0.1  | -0.31 | -0.11 | 31600 | 18600 | 29500 | 22200 | 35300 | 30100 | 27400 | 31100 | 640.8 | 1279.6 | 2 | 0.0111 | 8.658 |
| Actin, cytoplasmic 2<br>OS=Trichosurus<br>vulpecula<br>GN=ACTG1 PE=1<br>SV=1 | 7 ACTG_T<br>RIVU,sp P<br>63258 AC<br>TG_BOVI<br>N,sp P63<br>259 ACTG<br>_RAT,sp <br>P63260 A<br>CTG_MO<br>USE,sp P6<br>3261 ACT<br>G_HUMA<br>N,tr D2I7<br>P0 D2I7P<br>O_AILME,t<br>r F1PQL8<br> F1PQL8_<br>CANFA,tr <br>F6TII3 F6<br>TII3_MAC<br>MU,tr F7<br>AAK7 F7A<br>AK7_HOR<br>SE,tr F7DI<br>B7 F7DIB<br>7_MOND<br>O,tr F7I0 | aGF<br>AGD<br>DAP<br>R | 86% | 37.5 | 49.97954 | Ref | -0.33 | 0.051 | -0.41 | -0.23 | -0.23 | -0.24 | -0.15 | 11100 | 8650  | 12200 | 9970  | 12400 | 10800 | 11300 | 11900 | 640.8 | 1279.6 | 2 | 0.0128 | 9.986 |



|                                                                              |                                                                                                                                                                                                                                                                                                                                   |                     |     |      |          |     |       |       |       |        |       |       |      |       |       |       |       |       |       |       |       |       |        |   |        |       |
|------------------------------------------------------------------------------|-----------------------------------------------------------------------------------------------------------------------------------------------------------------------------------------------------------------------------------------------------------------------------------------------------------------------------------|---------------------|-----|------|----------|-----|-------|-------|-------|--------|-------|-------|------|-------|-------|-------|-------|-------|-------|-------|-------|-------|--------|---|--------|-------|
| Actin, cytoplasmic 2<br>OS=Trichosurus<br>vulpecula<br>GN=ACTG1 PE=1<br>SV=1 | 7 ACTG_T<br>RIVU,sp P<br>63258 AC<br>TG_BOVI<br>N,sp P63<br>259 ACTG<br>_RAT,sp <br>P63260 A<br>CTG_MO<br>USE,sp P6<br>3261 ACT<br>G_HUMA<br>N,tr D2I7<br>P0 D2I7P<br>0_AILME,t<br>r F1PQL8<br> F1PQL8_<br>CANFA,tr <br>F6TII3 F6<br>TII3_MAC<br>MU,tr F7<br>AAK7 F7A<br>AK7_HOR<br>SE,tr F7DI<br>B7 F7DIB<br>7_MOND<br>O,tr F7I0 | aVFP<br>SIVG<br>R   | 53% | 30.7 | 50.92268 | Ref | 0.073 | 0.21  | -0.33 | -0.073 | -0.27 | -0.84 | 582) | 2560  | 1890  | 2260  | 1750  | 2290  | 1750  | 1230  | 2)    | 417.3 | 1248.7 | 3 | 0.0073 | 5.876 |
| Actin, cytoplasmic 2<br>OS=Trichosurus<br>vulpecula<br>GN=ACTG1 PE=1<br>SV=1 | 7 ACTG_T<br>RIVU,sp P<br>63258 AC<br>TG_BOVI<br>N,sp P63<br>259 ACTG<br>_RAT,sp <br>P63260 A<br>CTG_MO<br>USE,sp P6<br>3261 ACT<br>G_HUMA<br>N,tr D2I7<br>P0 D2I7P<br>0_AILME,t<br>r F1PQL8<br> F1PQL8_<br>CANFA,tr <br>F6TII3 F6<br>TII3_MAC<br>MU,tr F7<br>AAK7 F7A<br>AK7_HOR<br>SE,tr F7DI<br>B7 F7DIB<br>7_MOND<br>O,tr F7I0 | aVFP<br>SIVG<br>RPR | 55% | 31.4 | 51.27205 | Ref | -0.49 | 0.024 | -0.48 | -0.19  | -0.17 | -0.39 | 0.13 | 24200 | 17400 | 27000 | 21400 | 28800 | 25500 | 22800 | 32700 | 501.6 | 1501.9 | 3 | 0.0189 | 12.56 |

|                                                                              |                                                                                                                                                                                                                                                                                                                                   |                     |     |      |          |     |       |       |       |       |       |       |      |       |       |       |       |       |       |       |       |       |        |   |        |       |
|------------------------------------------------------------------------------|-----------------------------------------------------------------------------------------------------------------------------------------------------------------------------------------------------------------------------------------------------------------------------------------------------------------------------------|---------------------|-----|------|----------|-----|-------|-------|-------|-------|-------|-------|------|-------|-------|-------|-------|-------|-------|-------|-------|-------|--------|---|--------|-------|
| Actin, cytoplasmic 2<br>OS=Trichosurus<br>vulpecula<br>GN=ACTG1 PE=1<br>SV=1 | 7 ACTG_T<br>RIVU,sp P<br>63258 AC<br>TG_BOVI<br>N,sp P63<br>259 ACTG<br>_RAT,sp <br>P63260 A<br>CTG_MO<br>USE,sp P6<br>3261 ACT<br>G_HUMA<br>N,tr D2I7<br>P0 D2I7P<br>0_AILME,t<br>r F1PQL8<br> F1PQL8_<br>CANFA,tr <br>F6TII3 F6<br>TII3_MAC<br>MU,tr F7<br>AAK7 F7A<br>AK7_HOR<br>SE,tr F7DI<br>B7 F7DIB<br>7_MOND<br>O,tr F7I0 | aVFP<br>SIVG<br>RPR | 83% | 38.8 | 51.35877 | Ref | -0.46 | -0.07 | -0.38 | -0.12 | -0.01 | -0.65 | 0.12 | 45300 | 33900 | 48300 | 43700 | 57700 | 54400 | 36400 | 61600 | 501.6 | 1501.9 | 3 | 0.0104 | 6.949 |
| Actin, cytoplasmic 2<br>OS=Trichosurus<br>vulpecula<br>GN=ACTG1 PE=1<br>SV=1 | 7 ACTG_T<br>RIVU,sp P<br>63258 AC<br>TG_BOVI<br>N,sp P63<br>259 ACTG<br>_RAT,sp <br>P63260 A<br>CTG_MO<br>USE,sp P6<br>3261 ACT<br>G_HUMA<br>N,tr D2I7<br>P0 D2I7P<br>0_AILME,t<br>r F1PQL8<br> F1PQL8_<br>CANFA,tr <br>F6TII3 F6<br>TII3_MAC<br>MU,tr F7<br>AAK7 F7A<br>AK7_HOR<br>SE,tr F7DI<br>B7 F7DIB<br>7_MOND<br>O,tr F7I0 | aVFP<br>SIVG<br>RPR | 90% | 43.8 | 51.15524 | Ref | -0.76 | 0.23  | -0.67 | -0.08 | -0.15 | -0.57 | 0.13 | 15500 | 8610  | 18600 | 11200 | 18500 | 15400 | 12000 | 19400 | 501.6 | 1501.9 | 3 | 0.009  | 5.991 |

|                                                                              |                                                                                                                                                                                                                                                                                                                                   |                     |     |      |          |     |      |       |       |       |       |      |      |       |       |       |       |        |       |       |        |       |        |   |        |       |
|------------------------------------------------------------------------------|-----------------------------------------------------------------------------------------------------------------------------------------------------------------------------------------------------------------------------------------------------------------------------------------------------------------------------------|---------------------|-----|------|----------|-----|------|-------|-------|-------|-------|------|------|-------|-------|-------|-------|--------|-------|-------|--------|-------|--------|---|--------|-------|
| Actin, cytoplasmic 2<br>OS=Trichosurus<br>vulpecula<br>GN=ACTG1 PE=1<br>SV=1 | 7 ACTG_T<br>RIVU,sp P<br>63258 AC<br>TG_BOVI<br>N,sp P63<br>259 ACTG<br>_RAT,sp <br>P63260 A<br>CTG_MO<br>USE,sp P6<br>3261 ACT<br>G_HUMA<br>N,tr D2I7<br>P0 D2I7P<br>0_AILME,t<br>r F1PQL8<br> F1PQL8_<br>CANFA,tr <br>F6TII3 F6<br>TII3_MAC<br>MU,tr F7<br>AAK7 F7A<br>AK7_HOR<br>SE,tr F7DI<br>B7 F7DIB<br>7_MOND<br>O,tr F7I0 | aVFP<br>SIVG<br>RPR | 57% | 31.7 | 51.22448 | Ref | -0.7 | 0.041 | -0.54 | -0.12 | -0.07 | -0.5 | 0.17 | 1E+05 | 66000 | 1E+05 | 89700 | 133000 | 1E+05 | 92900 | 147000 | 501.6 | 1501.9 | 3 | 0.0101 | 6.71  |
| Actin, cytoplasmic 2<br>OS=Trichosurus<br>vulpecula<br>GN=ACTG1 PE=1<br>SV=1 | 7 ACTG_T<br>RIVU,sp P<br>63258 AC<br>TG_BOVI<br>N,sp P63<br>259 ACTG<br>_RAT,sp <br>P63260 A<br>CTG_MO<br>USE,sp P6<br>3261 ACT<br>G_HUMA<br>N,tr D2I7<br>P0 D2I7P<br>0_AILME,t<br>r F1PQL8<br> F1PQL8_<br>CANFA,tr <br>F6TII3 F6<br>TII3_MAC<br>MU,tr F7<br>AAK7 F7A<br>AK7_HOR<br>SE,tr F7DI<br>B7 F7DIB<br>7_MOND<br>O,tr F7I0 | aVFP<br>SIVG<br>RPR | 79% | 34.6 | 50.79778 | Ref | -1   | 0.13  | -0.64 | -0.14 | -0.11 | -0.6 | 0.48 | 10800 | 5770  | 13700 | 9080  | 14100  | 12600 | 9350  | 19700  | 376.5 | 1501.9 | 4 | 0.0037 | 2.436 |

|                                                                              |                                                                                                                                                                                                                                                                                                                                   |                     |     |      |          |     |                                          |       |       |       |       |       |      |       |                                       |       |       |       |       |       |       |       |        |   |        |       |
|------------------------------------------------------------------------------|-----------------------------------------------------------------------------------------------------------------------------------------------------------------------------------------------------------------------------------------------------------------------------------------------------------------------------------|---------------------|-----|------|----------|-----|------------------------------------------|-------|-------|-------|-------|-------|------|-------|---------------------------------------|-------|-------|-------|-------|-------|-------|-------|--------|---|--------|-------|
| Actin, cytoplasmic 2<br>OS=Trichosurus<br>vulpecula<br>GN=ACTG1 PE=1<br>SV=1 | 7 ACTG_T<br>RIVU,sp P<br>63258 AC<br>TG_BOVI<br>N,sp P63<br>259 ACTG<br>_RAT,sp <br>P63260 A<br>CTG_MO<br>USE,sp P6<br>3261 ACT<br>G_HUMA<br>N,tr D2I7<br>P0 D2I7P<br>0_AILME,t<br>r F1PQL8<br> F1PQL8_<br>CANFA,tr <br>F6TII3 F6<br>TII3_MAC<br>MU,tr F7<br>AAK7 F7A<br>AK7_HOR<br>SE,tr F7DI<br>B7 F7DIB<br>7_MOND<br>O,tr F7I0 | aVFP<br>SIVG<br>RPR | 81% | 38   | 51.38606 | Ref | -0.59                                    | -0.05 | -0.45 | -0.2  | -0.05 | -0.37 | 0.13 | 33200 | 22200                                 | 35000 | 29900 | 39200 | 37800 | 31700 | 44600 | 501.6 | 1501.9 | 3 | 0.0135 | 8.966 |
| Actin, cytoplasmic 2<br>OS=Trichosurus<br>vulpecula<br>GN=ACTG1 PE=1<br>SV=1 | 7 ACTG_T<br>RIVU,sp P<br>63258 AC<br>TG_BOVI<br>N,sp P63<br>259 ACTG<br>_RAT,sp <br>P63260 A<br>CTG_MO<br>USE,sp P6<br>3261 ACT<br>G_HUMA<br>N,tr D2I7<br>P0 D2I7P<br>0_AILME,t<br>r F1PQL8<br> F1PQL8_<br>CANFA,tr <br>F6TII3 F6<br>TII3_MAC<br>MU,tr F7<br>AAK7 F7A<br>AK7_HOR<br>SE,tr F7DI<br>B7 F7DIB<br>7_MOND<br>O,tr F7I0 | aVFP<br>SIVG<br>RPR | 77% | 34.7 | 51.35873 | Ref | Value<br>Missing<br>(-<br>0.8241<br>942) | -0.2  | -0.85 | -0.18 | -0.08 | -0.43 | 0.68 | 3110  | Value<br>Missing (-<br>0.824194<br>2) | 3290  | 2350  | 4130  | 3860  | 3170  | 6780  | 376.5 | 1501.9 | 4 | 0.0107 | 7.146 |

|                                                                              |                                                                                                                                                                                                                                                                                                                                   |                     |     |      |          |     |       |       |       |        |       |      |       |       |        |       |        |        |       |       |        |       |        |   |        |       |
|------------------------------------------------------------------------------|-----------------------------------------------------------------------------------------------------------------------------------------------------------------------------------------------------------------------------------------------------------------------------------------------------------------------------------|---------------------|-----|------|----------|-----|-------|-------|-------|--------|-------|------|-------|-------|--------|-------|--------|--------|-------|-------|--------|-------|--------|---|--------|-------|
| Actin, cytoplasmic 2<br>OS=Trichosurus<br>vulpecula<br>GN=ACTG1 PE=1<br>SV=1 | 7 ACTG_T<br>RIVU,sp P<br>63258 AC<br>TG_BOVI<br>N,sp P63<br>259 ACTG<br>_RAT,sp <br>P63260 A<br>CTG_MO<br>USE,sp P6<br>3261 ACT<br>G_HUMA<br>N,tr D2I7<br>P0 D2I7P<br>0_AILME,t<br>r F1PQL8<br> F1PQL8_<br>CANFA,tr <br>F6TII3 F6<br>TII3_MAC<br>MU,tr F7<br>AAK7 F7A<br>AK7_HOR<br>SE,tr F7DI<br>B7 F7DIB<br>7_MOND<br>O,tr F7I0 | aVFP<br>SIVG<br>RPR | 52% | 31   | 51.35769 | Ref | -0.59 | -0.09 | -0.48 | -0.048 | -0.17 | -0.4 | 0.24  | 2E+05 | 136000 | 2E+05 | 179000 | 266000 | 2E+05 | 2E+05 | 294000 | 501.6 | 1501.9 | 3 | 0.0102 | 6.77  |
| Actin, cytoplasmic 2<br>OS=Trichosurus<br>vulpecula<br>GN=ACTG1 PE=1<br>SV=1 | 7 ACTG_T<br>RIVU,sp P<br>63258 AC<br>TG_BOVI<br>N,sp P63<br>259 ACTG<br>_RAT,sp <br>P63260 A<br>CTG_MO<br>USE,sp P6<br>3261 ACT<br>G_HUMA<br>N,tr D2I7<br>P0 D2I7P<br>0_AILME,t<br>r F1PQL8<br> F1PQL8_<br>CANFA,tr <br>F6TII3 F6<br>TII3_MAC<br>MU,tr F7<br>AAK7 F7A<br>AK7_HOR<br>SE,tr F7DI<br>B7 F7DIB<br>7_MOND<br>O,tr F7I0 | aVFP<br>SIVG<br>RPR | 71% | 34.8 | 51.3533  | Ref | -0.38 | 0.069 | -0.44 | -0.12  | -0.22 | -0.4 | 0.007 | 12700 | 10300  | 15200 | 11900  | 16500  | 13400 | 12400 | 16300  | 501.6 | 1501.9 | 3 | 0.011  | 7.329 |

|                                                                              |                                                                                                                                                                                                                                                                                                                                   |                     |     |      |          |     |                                          |       |       |        |       |       |      |       |        |       |        |        |       |       |        |       |        |   |        |       |
|------------------------------------------------------------------------------|-----------------------------------------------------------------------------------------------------------------------------------------------------------------------------------------------------------------------------------------------------------------------------------------------------------------------------------|---------------------|-----|------|----------|-----|------------------------------------------|-------|-------|--------|-------|-------|------|-------|--------|-------|--------|--------|-------|-------|--------|-------|--------|---|--------|-------|
| Actin, cytoplasmic 2<br>OS=Trichosurus<br>vulpecula<br>GN=ACTG1 PE=1<br>SV=1 | 7 ACTG_T<br>RIVU,sp P<br>63258 AC<br>TG_BOVI<br>N,sp P63<br>259 ACTG<br>_RAT,sp <br>P63260 A<br>CTG_MO<br>USE,sp P6<br>3261 ACT<br>G_HUMA<br>N,tr D2I7<br>P0 D2I7P<br>0_AILME,t<br>r F1PQL8<br> F1PQL8_<br>CANFA,tr <br>F6TII3 F6<br>TII3_MAC<br>MU,tr F7<br>AAK7 F7A<br>AK7_HOR<br>SE,tr F7DI<br>B7 F7DIB<br>7_MOND<br>O,tr F7I0 | aVFP<br>SIVG<br>RPR | 84% | 39.5 | 51.35877 | Ref | -0.77                                    | -0.09 | -0.42 | 0.02   | -0.15 | -0.63 | 0.17 | 8E+05 | 419000 | 7E+05 | 653000 | 975000 | 8E+05 | 6E+05 | 982000 | 501.6 | 1501.9 | 3 | 0.0104 | 6.89  |
| Actin, cytoplasmic 2<br>OS=Trichosurus<br>vulpecula<br>GN=ACTG1 PE=1<br>SV=1 | 7 ACTG_T<br>RIVU,sp P<br>63258 AC<br>TG_BOVI<br>N,sp P63<br>259 ACTG<br>_RAT,sp <br>P63260 A<br>CTG_MO<br>USE,sp P6<br>3261 ACT<br>G_HUMA<br>N,tr D2I7<br>P0 D2I7P<br>0_AILME,t<br>r F1PQL8<br> F1PQL8_<br>CANFA,tr <br>F6TII3 F6<br>TII3_MAC<br>MU,tr F7<br>AAK7 F7A<br>AK7_HOR<br>SE,tr F7DI<br>B7 F7DIB<br>7_MOND<br>O,tr F7I0 | aVFP<br>SIVG<br>RPR | 53% | 29.4 | 51.31583 | Ref | Value<br>Missing<br>(-<br>0.6964<br>784) | 0.033 | -0.96 | -0.084 | 0.052 | -0.6  | 0.34 | 32300 | 4)     | 35600 | 20200  | 40700  | 39000 | 26000 | 49200  | 376.5 | 1501.9 | 4 | 0.0101 | 6.747 |

|                                                                              |                                                                                                                                                                                                                                                                                                                                   |                     |     |      |          |     |       |       |       |       |       |       |                                           |      |      |      |      |      |      |      |                                       |       |        |   |        |       |
|------------------------------------------------------------------------------|-----------------------------------------------------------------------------------------------------------------------------------------------------------------------------------------------------------------------------------------------------------------------------------------------------------------------------------|---------------------|-----|------|----------|-----|-------|-------|-------|-------|-------|-------|-------------------------------------------|------|------|------|------|------|------|------|---------------------------------------|-------|--------|---|--------|-------|
| Actin, cytoplasmic 2<br>OS=Trichosurus<br>vulpecula<br>GN=ACTG1 PE=1<br>SV=1 | 7 ACTG_T<br>RIVU,sp P<br>63258 AC<br>TG_BOVI<br>N,sp P63<br>259 ACTG<br>_RAT,sp <br>P63260 A<br>CTG_MO<br>USE,sp P6<br>3261 ACT<br>G_HUMA<br>N,tr D2I7<br>P0 D2I7P<br>0_AILME,t<br>r F1PQL8<br> F1PQL8_<br>CANFA,tr <br>F6TII3 F6<br>TII3_MAC<br>MU,tr F7<br>AAK7 F7A<br>AK7_HOR<br>SE,tr F7DI<br>B7 F7DIB<br>7_MOND<br>O,tr F7I0 | aVFP<br>SIVG<br>RPR | 54% | 29.6 | 51.35708 | Ref | -0.71 | -0.07 | -0.24 | -0.36 | -0.11 | -0.45 | 0.32                                      | 2810 | 1780 | 3000 | 3010 | 3030 | 3150 | 2600 | 4400                                  | 376.5 | 1501.9 | 4 | 0.011  | 7.306 |
| Actin, cytoplasmic 2<br>OS=Trichosurus<br>vulpecula<br>GN=ACTG1 PE=1<br>SV=1 | 7 ACTG_T<br>RIVU,sp P<br>63258 AC<br>TG_BOVI<br>N,sp P63<br>259 ACTG<br>_RAT,sp <br>P63260 A<br>CTG_MO<br>USE,sp P6<br>3261 ACT<br>G_HUMA<br>N,tr D2I7<br>P0 D2I7P<br>0_AILME,t<br>r F1PQL8<br> F1PQL8_<br>CANFA,tr <br>F6TII3 F6<br>TII3_MAC<br>MU,tr F7<br>AAK7 F7A<br>AK7_HOR<br>SE,tr F7DI<br>B7 F7DIB<br>7_MOND<br>O,tr F7I0 | aVFP<br>SIVG<br>RPR | 77% | 34.6 | 51.19249 | Ref | -0.51 | 0.22  | -0.28 | -0.12 | 0.098 | -0.34 | Value<br>Missin<br>g (-<br>0.8606<br>791) | 3270 | 2200 | 3970 | 3130 | 3860 | 3930 | 3030 | Value<br>Missing (-<br>0.860679<br>1) | 376.5 | 1501.9 | 4 | 0.0076 | 5.044 |

|                                                                              |                                                                                                                                                                                                                                                                                                                                   |                     |     |      |          |     |       |       |       |       |       |       |       |      |      |      |      |      |      |      |      |       |        |   |        |       |
|------------------------------------------------------------------------------|-----------------------------------------------------------------------------------------------------------------------------------------------------------------------------------------------------------------------------------------------------------------------------------------------------------------------------------|---------------------|-----|------|----------|-----|-------|-------|-------|-------|-------|-------|-------|------|------|------|------|------|------|------|------|-------|--------|---|--------|-------|
| Actin, cytoplasmic 2<br>OS=Trichosurus<br>vulpecula<br>GN=ACTG1 PE=1<br>SV=1 | 7 ACTG_T<br>RIVU,sp P<br>63258 AC<br>TG_BOVI<br>N,sp P63<br>259 ACTG<br>_RAT,sp <br>P63260 A<br>CTG_MO<br>USE,sp P6<br>3261 ACT<br>G_HUMA<br>N,tr D2I7<br>P0 D2I7P<br>0_AILME,t<br>r F1PQL8<br> F1PQL8_<br>CANFA,tr <br>F6TII3 F6<br>TII3_MAC<br>MU,tr F7<br>AAK7 F7A<br>AK7_HOR<br>SE,tr F7DI<br>B7 F7DIB<br>7_MOND<br>O,tr F7I0 | aVFP<br>SIVG<br>RPR | 82% | 38.2 | 51.15174 | Ref | -0.43 | -0.08 | -0.47 | -0.2  | -0.17 | -0.26 | 0.095 | 1700 | 1270 | 1770 | 1510 | 2010 | 1790 | 1750 | 2230 | 501.6 | 1501.9 | 3 | 0.0091 | 6.051 |
| Actin, cytoplasmic 2<br>OS=Trichosurus<br>vulpecula<br>GN=ACTG1 PE=1<br>SV=1 | 7 ACTG_T<br>RIVU,sp P<br>63258 AC<br>TG_BOVI<br>N,sp P63<br>259 ACTG<br>_RAT,sp <br>P63260 A<br>CTG_MO<br>USE,sp P6<br>3261 ACT<br>G_HUMA<br>N,tr D2I7<br>P0 D2I7P<br>0_AILME,t<br>r F1PQL8<br> F1PQL8_<br>CANFA,tr <br>F6TII3 F6<br>TII3_MAC<br>MU,tr F7<br>AAK7 F7A<br>AK7_HOR<br>SE,tr F7DI<br>B7 F7DIB<br>7_MOND<br>O,tr F7I0 | aVFP<br>SIVG<br>RPR | 70% | 34.3 | 51.19246 | Ref | -0.6  | -0.02 | -0.51 | -0.27 | -0.11 | -0.44 | 0.19  | 7240 | 4360 | 7050 | 5660 | 7340 | 7190 | 5940 | 9130 | 501.6 | 1501.9 | 3 | 0.0074 | 4.953 |



|                                                                              |                                                                                                                                                                                                                                                                                                                                   |                     |     |      |          |     |       |       |       |       |       |       |       |      |      |      |      |      |      |      |      |       |        |   |        |       |
|------------------------------------------------------------------------------|-----------------------------------------------------------------------------------------------------------------------------------------------------------------------------------------------------------------------------------------------------------------------------------------------------------------------------------|---------------------|-----|------|----------|-----|-------|-------|-------|-------|-------|-------|-------|------|------|------|------|------|------|------|------|-------|--------|---|--------|-------|
| Actin, cytoplasmic 2<br>OS=Trichosurus<br>vulpecula<br>GN=ACTG1 PE=1<br>SV=1 | 7 ACTG_T<br>RIVU,sp P<br>63258 AC<br>TG_BOVI<br>N,sp P63<br>259 ACTG<br>_RAT,sp <br>P63260 A<br>CTG_MO<br>USE,sp P6<br>3261 ACT<br>G_HUMA<br>N,tr D2I7<br>P0 D2I7P<br>0_AILME,t<br>r F1PQL8<br> F1PQL8_<br>CANFA,tr <br>F6TII3 F6<br>TII3_MAC<br>MU,tr F7<br>AAK7 F7A<br>AK7_HOR<br>SE,tr F7DI<br>B7 F7DIB<br>7_MOND<br>O,tr F7I0 | aVFP<br>SIVG<br>RPR | 84% | 39.2 | 51.15174 | Ref | -0.64 | -0.11 | -0.46 | -0.23 | -0.11 | -0.42 | 0.24  | 2030 | 1220 | 1900 | 1680 | 2160 | 2060 | 1730 | 2710 | 501.6 | 1501.9 | 3 | 0.0091 | 6.051 |
| Actin, cytoplasmic 2<br>OS=Trichosurus<br>vulpecula<br>GN=ACTG1 PE=1<br>SV=1 | 7 ACTG_T<br>RIVU,sp P<br>63258 AC<br>TG_BOVI<br>N,sp P63<br>259 ACTG<br>_RAT,sp <br>P63260 A<br>CTG_MO<br>USE,sp P6<br>3261 ACT<br>G_HUMA<br>N,tr D2I7<br>P0 D2I7P<br>0_AILME,t<br>r F1PQL8<br> F1PQL8_<br>CANFA,tr <br>F6TII3 F6<br>TII3_MAC<br>MU,tr F7<br>AAK7 F7A<br>AK7_HOR<br>SE,tr F7DI<br>B7 F7DIB<br>7_MOND<br>O,tr F7I0 | aVFP<br>SIVG<br>RPR | 89% | 42.4 | 51.19351 | Ref | -0.3  | -0.07 | -0.48 | -0.15 | -0.14 | -0.16 | -0.17 | 1040 | 851  | 1090 | 914  | 1270 | 1110 | 1150 | 1130 | 501.6 | 1501.9 | 3 | 0.008  | 5.313 |

|                                                                              |                                                                                                                                                                                                                                                                                                                                   |            |     |      |          |     |      |       |       |       |       |       |       |       |        |       |        |        |       |       |        |       |        |   |        |       |
|------------------------------------------------------------------------------|-----------------------------------------------------------------------------------------------------------------------------------------------------------------------------------------------------------------------------------------------------------------------------------------------------------------------------------|------------|-----|------|----------|-----|------|-------|-------|-------|-------|-------|-------|-------|--------|-------|--------|--------|-------|-------|--------|-------|--------|---|--------|-------|
| Actin, cytoplasmic 2<br>OS=Trichosurus<br>vulpecula<br>GN=ACTG1 PE=1<br>SV=1 | 7 ACTG_T<br>RIVU,sp P<br>63258 AC<br>TG_BOVI<br>N,sp P63<br>259 ACTG<br>_RAT,sp <br>P63260 A<br>CTG_MO<br>USE,sp P6<br>3261 ACT<br>G_HUMA<br>N,tr D2I7<br>P0 D2I7P<br>0_AILME,t<br>r F1PQL8<br> F1PQL8_<br>CANFA,tr <br>F6TII3 F6<br>TII3_MAC<br>MU,tr F7<br>AAK7 F7A<br>AK7_HOR<br>SE,tr F7DI<br>B7 F7DIB<br>7_MOND<br>O,tr F7I0 | cDV<br>DIR | 79% | 31.8 | 46.7374  | Ref | 0.17 | -0.43 | -0.03 | -0.39 | -0.72 | 0.089 | -0.76 | 4E+05 | 368000 | 3E+05 | 389000 | 335000 | 2E+05 | 4E+05 | 234000 | 535.8 | 1069.5 | 2 | 0.0105 | 9.78  |
| Actin, cytoplasmic 2<br>OS=Trichosurus<br>vulpecula<br>GN=ACTG1 PE=1<br>SV=1 | 7 ACTG_T<br>RIVU,sp P<br>63258 AC<br>TG_BOVI<br>N,sp P63<br>259 ACTG<br>_RAT,sp <br>P63260 A<br>CTG_MO<br>USE,sp P6<br>3261 ACT<br>G_HUMA<br>N,tr D2I7<br>P0 D2I7P<br>0_AILME,t<br>r F1PQL8<br> F1PQL8_<br>CANFA,tr <br>F6TII3 F6<br>TII3_MAC<br>MU,tr F7<br>AAK7 F7A<br>AK7_HOR<br>SE,tr F7DI<br>B7 F7DIB<br>7_MOND<br>O,tr F7I0 | cDV<br>DIR | 53% | 26.8 | 47.22107 | Ref | 0.11 | -0.27 | -0.16 | -0.32 | -0.77 | 0.14  | -0.71 | 42100 | 38300  | 32000 | 38900  | 38100  | 24500 | 47800 | 26400  | 535.8 | 1069.5 | 2 | 0.009  | 8.416 |

|                                                                              |                                                                                                                                                                                                                                                                                                                                   |                  |     |      |          |     |        |       |       |       |       |      |       |       |       |       |       |       |       |       |       |       |        |   |        |       |
|------------------------------------------------------------------------------|-----------------------------------------------------------------------------------------------------------------------------------------------------------------------------------------------------------------------------------------------------------------------------------------------------------------------------------|------------------|-----|------|----------|-----|--------|-------|-------|-------|-------|------|-------|-------|-------|-------|-------|-------|-------|-------|-------|-------|--------|---|--------|-------|
| Actin, cytoplasmic 2<br>OS=Trichosurus<br>vulpecula<br>GN=ACTG1 PE=1<br>SV=1 | 7 ACTG_T<br>RIVU,sp P<br>63258 AC<br>TG_BOVI<br>N,sp P63<br>259 ACTG<br>_RAT,sp <br>P63260 A<br>CTG_MO<br>USE,sp P6<br>3261 ACT<br>G_HUMA<br>N,tr D2I7<br>P0 D2I7P<br>0_AILME,t<br>r F1PQL8<br> F1PQL8_<br>CANFA,tr <br>F6TII3 F6<br>TII3_MAC<br>MU,tr F7<br>AAK7 F7A<br>AK7_HOR<br>SE,tr F7DI<br>B7 F7DIB<br>7_MOND<br>O,tr F7I0 | dLTD<br>YLM<br>k | 93% | 45.9 | 52.86007 | Ref | -0.007 | -0.28 | -0.35 | -0.18 | -0.74 | 0.18 | -0.81 | 54900 | 41600 | 37500 | 39900 | 49500 | 29300 | 58100 | 29000 | 803.9 | 1605.9 | 2 | 0.0168 | 10.47 |
| Actin, cytoplasmic 2<br>OS=Trichosurus<br>vulpecula<br>GN=ACTG1 PE=1<br>SV=1 | 7 ACTG_T<br>RIVU,sp P<br>63258 AC<br>TG_BOVI<br>N,sp P63<br>259 ACTG<br>_RAT,sp <br>P63260 A<br>CTG_MO<br>USE,sp P6<br>3261 ACT<br>G_HUMA<br>N,tr D2I7<br>P0 D2I7P<br>0_AILME,t<br>r F1PQL8<br> F1PQL8_<br>CANFA,tr <br>F6TII3 F6<br>TII3_MAC<br>MU,tr F7<br>AAK7 F7A<br>AK7_HOR<br>SE,tr F7DI<br>B7 F7DIB<br>7_MOND<br>O,tr F7I0 | dLTD<br>YLM<br>k | 85% | 39.9 | 52.79222 | Ref | 0.055  | -0.21 | -0.47 | -0.2  | -0.7  | 0.09 | -0.83 | 54600 | 41400 | 37400 | 35000 | 46700 | 28700 | 51900 | 27300 | 803.9 | 1605.9 | 2 | 0.0102 | 6.37  |

|                                                                              |                                                                                                                                                                                                                                                                                                                                   |                  |     |      |          |     |       |       |       |       |       |       |       |       |       |       |       |       |      |       |      |       |        |   |        |       |
|------------------------------------------------------------------------------|-----------------------------------------------------------------------------------------------------------------------------------------------------------------------------------------------------------------------------------------------------------------------------------------------------------------------------------|------------------|-----|------|----------|-----|-------|-------|-------|-------|-------|-------|-------|-------|-------|-------|-------|-------|------|-------|------|-------|--------|---|--------|-------|
| Actin, cytoplasmic 2<br>OS=Trichosurus<br>vulpecula<br>GN=ACTG1 PE=1<br>SV=1 | 7 ACTG_T<br>RIVU,sp P<br>63258 AC<br>TG_BOVI<br>N,sp P63<br>259 ACTG<br>_RAT,sp <br>P63260 A<br>CTG_MO<br>USE,sp P6<br>3261 ACT<br>G_HUMA<br>N,tr D2I7<br>P0 D2I7P<br>0_AILME,t<br>r F1PQL8<br> F1PQL8_<br>CANFA,tr <br>F6TII3 F6<br>TII3_MAC<br>MU,tr F7<br>AAK7 F7A<br>AK7_HOR<br>SE,tr F7DI<br>B7 F7DIB<br>7_MOND<br>O,tr F7I0 | dLTD<br>YLM<br>k | 81% | 38.3 | 52.77107 | Ref | 0.025 | -0.22 | -0.36 | -0.16 | -0.62 | 0.026 | -0.55 | 8330  | 7160  | 6560  | 6670  | 8470  | 5350 | 8770  | 5820 | 803.9 | 1605.9 | 2 | 0.0082 | 5.076 |
| Actin, cytoplasmic 2<br>OS=Trichosurus<br>vulpecula<br>GN=ACTG1 PE=1<br>SV=1 | 7 ACTG_T<br>RIVU,sp P<br>63258 AC<br>TG_BOVI<br>N,sp P63<br>259 ACTG<br>_RAT,sp <br>P63260 A<br>CTG_MO<br>USE,sp P6<br>3261 ACT<br>G_HUMA<br>N,tr D2I7<br>P0 D2I7P<br>0_AILME,t<br>r F1PQL8<br> F1PQL8_<br>CANFA,tr <br>F6TII3 F6<br>TII3_MAC<br>MU,tr F7<br>AAK7 F7A<br>AK7_HOR<br>SE,tr F7DI<br>B7 F7DIB<br>7_MOND<br>O,tr F7I0 | dLTD<br>YLM<br>k | 82% | 38.7 | 52.75512 | Ref | 0.063 | -0.28 | -0.35 | -0.21 | -0.61 | 0.026 | -0.72 | 16200 | 13000 | 11100 | 11900 | 14400 | 9490 | 15500 | 9130 | 804   | 1605.9 | 2 | #####  | 0.015 |

|                                                                              |                                                                                                                                                                                                                                                                                                                                   |                         |     |      |         |     |        |       |       |       |       |      |       |       |       |       |       |       |      |       |       |       |        |   |        |       |
|------------------------------------------------------------------------------|-----------------------------------------------------------------------------------------------------------------------------------------------------------------------------------------------------------------------------------------------------------------------------------------------------------------------------------|-------------------------|-----|------|---------|-----|--------|-------|-------|-------|-------|------|-------|-------|-------|-------|-------|-------|------|-------|-------|-------|--------|---|--------|-------|
| Actin, cytoplasmic 2<br>OS=Trichosurus<br>vulpecula<br>GN=ACTG1 PE=1<br>SV=1 | 7 ACTG_T<br>RIVU,sp P<br>63258 AC<br>TG_BOVI<br>N,sp P63<br>259 ACTG<br>_RAT,sp <br>P63260 A<br>CTG_MO<br>USE,sp P6<br>3261 ACT<br>G_HUMA<br>N,tr D2I7<br>P0 D2I7P<br>O_AILME,t<br>r F1PQL8<br> F1PQL8_<br>CANFA,tr <br>F6TII3 F6<br>TII3_MAC<br>MU,tr F7<br>AAK7 F7A<br>AK7_HOR<br>SE,tr F7DI<br>B7 F7DIB<br>7_MOND<br>O,tr F7I0 | dLTD<br>YLmk            | 80% | 38   | 52.8512 | Ref | 0.0029 | -0.17 | -0.38 | -0.18 | -0.58 | 0.11 | -0.81 | 14100 | 11500 | 11100 | 10700 | 13600 | 8970 | 15100 | 7970  | 811.9 | 1621.9 | 2 | 0.0092 | 5.699 |
| Actin, cytoplasmic 2<br>OS=Trichosurus<br>vulpecula<br>GN=ACTG1 PE=1<br>SV=1 | 7 ACTG_T<br>RIVU,sp P<br>63258 AC<br>TG_BOVI<br>N,sp P63<br>259 ACTG<br>_RAT,sp <br>P63260 A<br>CTG_MO<br>USE,sp P6<br>3261 ACT<br>G_HUMA<br>N,tr D2I7<br>P0 D2I7P<br>O_AILME,t<br>r F1PQL8<br> F1PQL8_<br>CANFA,tr <br>F6TII3 F6<br>TII3_MAC<br>MU,tr F7<br>AAK7 F7A<br>AK7_HOR<br>SE,tr F7DI<br>B7 F7DIB<br>7_MOND<br>O,tr F7I0 | dSYV<br>GDE<br>AQS<br>k | 95% | 55.4 | 52.0709 | Ref | -0.88  | 1.2   | -1.6  | -1.4  | -0.91 | -1.3 | 1.1   | 2530  | 3090  | 14000 | 2270  | 2980  | 3570 | 2820  | 14500 | 904   | 1805.9 | 2 | 0.0238 | 13.16 |

|                                                                              |                                                                                                                                                                                                                                                                                                                                   |                         |     |      |          |     |       |       |       |        |       |       |       |       |        |       |        |        |       |       |        |     |        |   |        |       |
|------------------------------------------------------------------------------|-----------------------------------------------------------------------------------------------------------------------------------------------------------------------------------------------------------------------------------------------------------------------------------------------------------------------------------|-------------------------|-----|------|----------|-----|-------|-------|-------|--------|-------|-------|-------|-------|--------|-------|--------|--------|-------|-------|--------|-----|--------|---|--------|-------|
| Actin, cytoplasmic 2<br>OS=Trichosurus<br>vulpecula<br>GN=ACTG1 PE=1<br>SV=1 | 7 ACTG_T<br>RIVU,sp P<br>63258 AC<br>TG_BOVI<br>N,sp P63<br>259 ACTG<br>_RAT,sp <br>P63260 A<br>CTG_MO<br>USE,sp P6<br>3261 ACT<br>G_HUMA<br>N,tr D2I7<br>P0 D2I7P<br>0_AILME,t<br>r F1PQL8<br> F1PQL8_<br>CANFA,tr <br>F6TII3 F6<br>TII3_MAC<br>MU,tr F7<br>AAK7 F7A<br>AK7_HOR<br>SE,tr F7DI<br>B7 F7DIB<br>7_MOND<br>O,tr F7I0 | dSYV<br>GDE<br>AQS<br>k | 95% | 56.7 | 52.29477 | Ref | -0.67 | -0.02 | -0.67 | -0.005 | -0.11 | -0.29 | -0.08 | 4E+05 | 230000 | 4E+05 | 281000 | 490000 | 4E+05 | 4E+05 | 420000 | 904 | 1805.9 | 2 | 0.0166 | 9.178 |
| Actin, cytoplasmic 2<br>OS=Trichosurus<br>vulpecula<br>GN=ACTG1 PE=1<br>SV=1 | 7 ACTG_T<br>RIVU,sp P<br>63258 AC<br>TG_BOVI<br>N,sp P63<br>259 ACTG<br>_RAT,sp <br>P63260 A<br>CTG_MO<br>USE,sp P6<br>3261 ACT<br>G_HUMA<br>N,tr D2I7<br>P0 D2I7P<br>0_AILME,t<br>r F1PQL8<br> F1PQL8_<br>CANFA,tr <br>F6TII3 F6<br>TII3_MAC<br>MU,tr F7<br>AAK7 F7A<br>AK7_HOR<br>SE,tr F7DI<br>B7 F7DIB<br>7_MOND<br>O,tr F7I0 | dSYV<br>GDE<br>AQS<br>k | 95% | 58.7 | 52.29569 | Ref | -0.7  | 0.21  | -0.47 | -0.08  | -0.02 | -0.38 | -0.45 | 2E+05 | 80200  | 2E+05 | 114000 | 165000 | 2E+05 | 1E+05 | 116000 | 904 | 1805.9 | 2 | 0.0161 | 8.901 |

|                                                                           |                                                                                                                                                                                                                                                                                                                                   |                         |     |      |          |     |       |       |       |        |       |       |       |       |        |       |        |        |       |       |        |     |        |   |        |       |
|---------------------------------------------------------------------------|-----------------------------------------------------------------------------------------------------------------------------------------------------------------------------------------------------------------------------------------------------------------------------------------------------------------------------------|-------------------------|-----|------|----------|-----|-------|-------|-------|--------|-------|-------|-------|-------|--------|-------|--------|--------|-------|-------|--------|-----|--------|---|--------|-------|
| Actin, cytoplasmic 2<br>OS=Trichosurus vulpecula<br>GN=ACTG1 PE=1<br>SV=1 | 7 ACTG_T<br>RIVU,sp P<br>63258 AC<br>TG_BOVI<br>N,sp P63<br>259 ACTG<br>_RAT,sp <br>P63260 A<br>CTG_MO<br>USE,sp P6<br>3261 ACT<br>G_HUMA<br>N,tr D2I7<br>P0 D2I7P<br>0_AILME,t<br>r F1PQL8<br> F1PQL8_<br>CANFA,tr <br>F6TII3 F6<br>TII3_MAC<br>MU,tr F7<br>AAK7 F7A<br>AK7_HOR<br>SE,tr F7DI<br>B7 F7DIB<br>7_MOND<br>O,tr F7I0 | dSYV<br>GDE<br>AQS<br>k | 89% | 43.8 | 52.30595 | Ref | -0.39 | -0.26 | -0.93 | -0.027 | 0.12  | -0.36 | -0.28 | 4E+05 | 233000 | 3E+05 | 195000 | 401000 | 4E+05 | 3E+05 | 304000 | 603 | 1805.9 | 3 | 0.0155 | 8.567 |
| Actin, cytoplasmic 2<br>OS=Trichosurus vulpecula<br>GN=ACTG1 PE=1<br>SV=1 | 7 ACTG_T<br>RIVU,sp P<br>63258 AC<br>TG_BOVI<br>N,sp P63<br>259 ACTG<br>_RAT,sp <br>P63260 A<br>CTG_MO<br>USE,sp P6<br>3261 ACT<br>G_HUMA<br>N,tr D2I7<br>P0 D2I7P<br>0_AILME,t<br>r F1PQL8<br> F1PQL8_<br>CANFA,tr <br>F6TII3 F6<br>TII3_MAC<br>MU,tr F7<br>AAK7 F7A<br>AK7_HOR<br>SE,tr F7DI<br>B7 F7DIB<br>7_MOND<br>O,tr F7I0 | dSYV<br>GDE<br>AQS<br>k | 95% | 52.1 | 52.30587 | Ref | -0.95 | 0.09  | -0.4  | -0.11  | -0.03 | -0.19 | -0.21 | 6E+05 | 265000 | 6E+05 | 474000 | 636000 | 6E+05 | 6E+05 | 538000 | 603 | 1805.9 | 3 | 0.0153 | 8.467 |

|                                                                              |                                                                                                                                                                                                                                                                                                                                   |                         |     |      |          |     |       |       |       |        |       |       |       |       |       |       |       |       |       |       |       |     |        |   |        |       |
|------------------------------------------------------------------------------|-----------------------------------------------------------------------------------------------------------------------------------------------------------------------------------------------------------------------------------------------------------------------------------------------------------------------------------|-------------------------|-----|------|----------|-----|-------|-------|-------|--------|-------|-------|-------|-------|-------|-------|-------|-------|-------|-------|-------|-----|--------|---|--------|-------|
| Actin, cytoplasmic 2<br>OS=Trichosurus<br>vulpecula<br>GN=ACTG1 PE=1<br>SV=1 | 7 ACTG_T<br>RIVU,sp P<br>63258 AC<br>TG_BOVI<br>N,sp P63<br>259 ACTG<br>_RAT,sp <br>P63260 A<br>CTG_MO<br>USE,sp P6<br>3261 ACT<br>G_HUMA<br>N,tr D2I7<br>P0 D2I7P<br>0_AILME,t<br>r F1PQL8<br> F1PQL8_<br>CANFA,tr <br>F6TII3 F6<br>TII3_MAC<br>MU,tr F7<br>AAK7 F7A<br>AK7_HOR<br>SE,tr F7DI<br>B7 F7DIB<br>7_MOND<br>O,tr F7IO | dSYV<br>GDE<br>AQS<br>k | 95% | 50.3 | 52.32887 | Ref | -0.63 | -0.02 | -0.52 | -0.082 | -0.12 | -0.23 | -0.36 | 40800 | 20700 | 34300 | 27300 | 40700 | 34500 | 33500 | 30400 | 904 | 1805.9 | 2 | 0.0141 | 7.827 |
| Actin, cytoplasmic 2<br>OS=Trichosurus<br>vulpecula<br>GN=ACTG1 PE=1<br>SV=1 | 7 ACTG_T<br>RIVU,sp P<br>63258 AC<br>TG_BOVI<br>N,sp P63<br>259 ACTG<br>_RAT,sp <br>P63260 A<br>CTG_MO<br>USE,sp P6<br>3261 ACT<br>G_HUMA<br>N,tr D2I7<br>P0 D2I7P<br>0_AILME,t<br>r F1PQL8<br> F1PQL8_<br>CANFA,tr <br>F6TII3 F6<br>TII3_MAC<br>MU,tr F7<br>AAK7 F7A<br>AK7_HOR<br>SE,tr F7DI<br>B7 F7DIB<br>7_MOND<br>O,tr F7IO | dSYV<br>GDE<br>AQS<br>k | 95% | 54.5 | 52.24787 | Ref | -1    | 0.088 | -0.37 | -0.053 | 0.034 | -0.26 | -0.31 | 83900 | 37300 | 86800 | 71000 | 97400 | 90300 | 76800 | 73700 | 603 | 1805.9 | 3 | 0.0171 | 9.48  |



|                                                                              |                                                                                                                                                                                                                                                                                                                                   |                         |     |      |          |     |       |      |       |        |       |       |       |       |       |       |       |       |       |       |       |       |        |   |        |       |
|------------------------------------------------------------------------------|-----------------------------------------------------------------------------------------------------------------------------------------------------------------------------------------------------------------------------------------------------------------------------------------------------------------------------------|-------------------------|-----|------|----------|-----|-------|------|-------|--------|-------|-------|-------|-------|-------|-------|-------|-------|-------|-------|-------|-------|--------|---|--------|-------|
| Actin, cytoplasmic 2<br>OS=Trichosurus<br>vulpecula<br>GN=ACTG1 PE=1<br>SV=1 | 7 ACTG_T<br>RIVU,sp P<br>63258 AC<br>TG_BOVI<br>N,sp P63<br>259 ACTG<br>_RAT,sp <br>P63260 A<br>CTG_MO<br>USE,sp P6<br>3261 ACT<br>G_HUMA<br>N,tr D2I7<br>P0 D2I7P<br>0_AILME,t<br>r F1PQL8<br> F1PQL8_<br>CANFA,tr <br>F6TII3 F6<br>TII3_MAC<br>MU,tr F7<br>AAK7 F7A<br>AK7_HOR<br>SE,tr F7DI<br>B7 F7DIB<br>7_MOND<br>O,tr F7I0 | dSYV<br>GDE<br>AQS<br>k | 95% | 52.3 | 52.30559 | Ref | -0.73 | 0.13 | -0.54 | -0.062 | -0.05 | -0.3  | -0.3  | 11500 | 6070  | 11900 | 8400  | 12900 | 11300 | 9980  | 9890  | 904   | 1805.9 | 2 | 0.0154 | 8.502 |
| Actin, cytoplasmic 2<br>OS=Trichosurus<br>vulpecula<br>GN=ACTG1 PE=1<br>SV=1 | 7 ACTG_T<br>RIVU,sp P<br>63258 AC<br>TG_BOVI<br>N,sp P63<br>259 ACTG<br>_RAT,sp <br>P63260 A<br>CTG_MO<br>USE,sp P6<br>3261 ACT<br>G_HUMA<br>N,tr D2I7<br>P0 D2I7P<br>0_AILME,t<br>r F1PQL8<br> F1PQL8_<br>CANFA,tr <br>F6TII3 F6<br>TII3_MAC<br>MU,tr F7<br>AAK7 F7A<br>AK7_HOR<br>SE,tr F7DI<br>B7 F7DIB<br>7_MOND<br>O,tr F7I0 | dSYV<br>GDE<br>AqSk     | 88% | 42   | 51.83987 | Ref | -0.44 | -0.1 | -0.48 | -0.19  | -0.17 | -0.28 | -0.05 | 58100 | 37600 | 51500 | 44500 | 59800 | 53100 | 51400 | 59600 | 603.3 | 1806.9 | 3 | 0.017  | 9.38  |

|                                                                              |                                                                                                                                                                                                                                                                                                                                   |                                   |     |      |          |     |       |       |       |       |       |       |       |     |     |     |     |     |     |     |     |       |      |   |        |       |
|------------------------------------------------------------------------------|-----------------------------------------------------------------------------------------------------------------------------------------------------------------------------------------------------------------------------------------------------------------------------------------------------------------------------------|-----------------------------------|-----|------|----------|-----|-------|-------|-------|-------|-------|-------|-------|-----|-----|-----|-----|-----|-----|-----|-----|-------|------|---|--------|-------|
| Actin, cytoplasmic 2<br>OS=Trichosurus<br>vulpecula<br>GN=ACTG1 PE=1<br>SV=1 | 7 ACTG_T<br>RIVU,sp P<br>63258 AC<br>TG_BOVI<br>N,sp P63<br>259 ACTG<br>_RAT,sp <br>P63260 A<br>CTG_MO<br>USE,sp P6<br>3261 ACT<br>G_HUMA<br>N,tr D2I7<br>P0 D2I7P<br>0_AILME,t<br>r F1PQL8<br> F1PQL8_<br>CANFA,tr <br>F6TII3 F6<br>TII3_MAC<br>MU,tr F7<br>AAK7 F7A<br>AK7_HOR<br>SE,tr F7DI<br>B7 F7DIB<br>7_MOND<br>O,tr F7I0 | eEEI<br>AALV<br>IDnG<br>SGM<br>ck | 67% | 32.6 | 50.03473 | Ref | -0.49 | 0.14  | 0.017 | -0.46 | -0.71 | -0    | -0.35 | 176 | 109 | 184 | 190 | 150 | 111 | 188 | 147 | 724.7 | 2171 | 3 | 0.0162 | 7.467 |
| Actin, cytoplasmic 2<br>OS=Trichosurus<br>vulpecula<br>GN=ACTG1 PE=1<br>SV=1 | 7 ACTG_T<br>RIVU,sp P<br>63258 AC<br>TG_BOVI<br>N,sp P63<br>259 ACTG<br>_RAT,sp <br>P63260 A<br>CTG_MO<br>USE,sp P6<br>3261 ACT<br>G_HUMA<br>N,tr D2I7<br>P0 D2I7P<br>0_AILME,t<br>r F1PQL8<br> F1PQL8_<br>CANFA,tr <br>F6TII3 F6<br>TII3_MAC<br>MU,tr F7<br>AAK7 F7A<br>AK7_HOR<br>SE,tr F7DI<br>B7 F7DIB<br>7_MOND<br>O,tr F7I0 | eEEI<br>AALV<br>IDnG<br>SGM<br>ck | 95% | 68.4 | 50.39835 | Ref | -0.62 | -0.04 | -0.75 | -0.37 | -0.33 | -0.25 | 0.048 | 358 | 159 | 259 | 178 | 254 | 228 | 251 | 308 | 724.7 | 2171 | 3 | 0.0093 | 4.262 |

|                                                                              |                                                                                                                                                                                                                                                                                                                                   |                                   |     |      |          |     |        |       |       |        |       |       |       |       |       |       |       |       |       |       |       |       |      |   |        |       |
|------------------------------------------------------------------------------|-----------------------------------------------------------------------------------------------------------------------------------------------------------------------------------------------------------------------------------------------------------------------------------------------------------------------------------|-----------------------------------|-----|------|----------|-----|--------|-------|-------|--------|-------|-------|-------|-------|-------|-------|-------|-------|-------|-------|-------|-------|------|---|--------|-------|
| Actin, cytoplasmic 2<br>OS=Trichosurus<br>vulpecula<br>GN=ACTG1 PE=1<br>SV=1 | 7 ACTG_T<br>RIVU,sp P<br>63258 AC<br>TG_BOVI<br>N,sp P63<br>259 ACTG<br>_RAT,sp <br>P63260 A<br>CTG_MO<br>USE,sp P6<br>3261 ACT<br>G_HUMA<br>N,tr D2I7<br>P0 D2I7P<br>0_AILME,t<br>r F1PQL8<br> F1PQL8_<br>CANFA,tr <br>F6TII3 F6<br>TII3_MAC<br>MU,tr F7<br>AAK7 F7A<br>AK7_HOR<br>SE,tr F7DI<br>B7 F7DIB<br>7_MOND<br>O,tr F7I0 | eEEI<br>AALV<br>IDnG<br>SGM<br>ck | 87% | 40   | 50.23668 | Ref | -0.062 | -0.36 | -0.88 | -0.41  | 0.28  | -0.65 | -0.43 | 234   | 150   | 132   | 104   | 158   | 223   | 122   | 141   | 724.7 | 2171 | 3 | 0.0117 | 5.367 |
| Actin, cytoplasmic 2<br>OS=Trichosurus<br>vulpecula<br>GN=ACTG1 PE=1<br>SV=1 | 7 ACTG_T<br>RIVU,sp P<br>63258 AC<br>TG_BOVI<br>N,sp P63<br>259 ACTG<br>_RAT,sp <br>P63260 A<br>CTG_MO<br>USE,sp P6<br>3261 ACT<br>G_HUMA<br>N,tr D2I7<br>P0 D2I7P<br>0_AILME,t<br>r F1PQL8<br> F1PQL8_<br>CANFA,tr <br>F6TII3 F6<br>TII3_MAC<br>MU,tr F7<br>AAK7 F7A<br>AK7_HOR<br>SE,tr F7DI<br>B7 F7DIB<br>7_MOND<br>O,tr F7I0 | eITA<br>LAPS<br>TMk               | 93% | 48.6 | 52.72269 | Ref | 0.067  | -0.56 | -0.37 | -0.086 | -0.55 | 0.19  | -0.84 | 89400 | 73200 | 51300 | 65700 | 88400 | 55800 | 97700 | 47400 | 590.7 | 1769 | 3 | 0.0137 | 7.712 |

|                                                                              |                                                                                                                                                                                                                                                                                                                                   |                     |     |      |          |     |        |       |       |       |       |       |       |       |       |       |       |       |       |       |       |       |      |   |        |       |
|------------------------------------------------------------------------------|-----------------------------------------------------------------------------------------------------------------------------------------------------------------------------------------------------------------------------------------------------------------------------------------------------------------------------------|---------------------|-----|------|----------|-----|--------|-------|-------|-------|-------|-------|-------|-------|-------|-------|-------|-------|-------|-------|-------|-------|------|---|--------|-------|
| Actin, cytoplasmic 2<br>OS=Trichosurus<br>vulpecula<br>GN=ACTG1 PE=1<br>SV=1 | 7 ACTG_T<br>RIVU,sp P<br>63258 AC<br>TG_BOVI<br>N,sp P63<br>259 ACTG<br>_RAT,sp <br>P63260 A<br>CTG_MO<br>USE,sp P6<br>3261 ACT<br>G_HUMA<br>N,tr D2I7<br>P0 D2I7P<br>0_AILME,t<br>r F1PQL8<br> F1PQL8_<br>CANFA,tr <br>F6TII3 F6<br>TII3_MAC<br>MU,tr F7<br>AAK7 F7A<br>AK7_HOR<br>SE,tr F7DI<br>B7 F7DIB<br>7_MOND<br>O,tr F7I0 | eITA<br>LAPS<br>TMk | 82% | 38.4 | 52.467   | Ref | -0.014 | -0.29 | -0.3  | -0.26 | -0.54 | 0.077 | -0.46 | 10500 | 9010  | 8090  | 9020  | 10200 | 7350  | 11700 | 8020  | 885.5 | 1769 | 2 | 0.0062 | 3.5   |
| Actin, cytoplasmic 2<br>OS=Trichosurus<br>vulpecula<br>GN=ACTG1 PE=1<br>SV=1 | 7 ACTG_T<br>RIVU,sp P<br>63258 AC<br>TG_BOVI<br>N,sp P63<br>259 ACTG<br>_RAT,sp <br>P63260 A<br>CTG_MO<br>USE,sp P6<br>3261 ACT<br>G_HUMA<br>N,tr D2I7<br>P0 D2I7P<br>0_AILME,t<br>r F1PQL8<br> F1PQL8_<br>CANFA,tr <br>F6TII3 F6<br>TII3_MAC<br>MU,tr F7<br>AAK7 F7A<br>AK7_HOR<br>SE,tr F7DI<br>B7 F7DIB<br>7_MOND<br>O,tr F7I0 | eITA<br>LAPS<br>TMk | 87% | 42.8 | 52.78441 | Ref | -0.089 | -0.18 | -0.26 | -0.13 | -0.77 | 0.18  | -0.34 | 29500 | 28100 | 28500 | 30400 | 36500 | 20600 | 41300 | 28600 | 590.7 | 1769 | 3 | 0.0161 | 9.068 |

|                                                                              |                                                                                                                                                                                                                                                                                                                                   |                     |     |      |          |     |       |       |       |       |       |       |      |       |       |       |       |       |       |       |       |       |      |   |        |       |
|------------------------------------------------------------------------------|-----------------------------------------------------------------------------------------------------------------------------------------------------------------------------------------------------------------------------------------------------------------------------------------------------------------------------------|---------------------|-----|------|----------|-----|-------|-------|-------|-------|-------|-------|------|-------|-------|-------|-------|-------|-------|-------|-------|-------|------|---|--------|-------|
| Actin, cytoplasmic 2<br>OS=Trichosurus<br>vulpecula<br>GN=ACTG1 PE=1<br>SV=1 | 7 ACTG_T<br>RIVU,sp P<br>63258 AC<br>TG_BOVI<br>N,sp P63<br>259 ACTG<br>_RAT,sp <br>P63260 A<br>CTG_MO<br>USE,sp P6<br>3261 ACT<br>G_HUMA<br>N,tr D2I7<br>P0 D2I7P<br>0_AILME,t<br>r F1PQL8<br> F1PQL8_<br>CANFA,tr <br>F6TII3 F6<br>TII3_MAC<br>MU,tr F7<br>AAK7 F7A<br>AK7_HOR<br>SE,tr F7DI<br>B7 F7DIB<br>7_MOND<br>O,tr F7I0 | eITA<br>LAPS<br>Tmk | 94% | 46.8 | 52.56145 | Ref | -0.03 | -0.43 | -0.24 | -0.16 | -0.61 | 0.076 | -0.4 | 4320  | 3650  | 2990  | 3830  | 4470  | 2850  | 4800  | 3420  | 885.5 | 1769 | 2 | 0.0101 | 5.714 |
| Actin, cytoplasmic 2<br>OS=Trichosurus<br>vulpecula<br>GN=ACTG1 PE=1<br>SV=1 | 7 ACTG_T<br>RIVU,sp P<br>63258 AC<br>TG_BOVI<br>N,sp P63<br>259 ACTG<br>_RAT,sp <br>P63260 A<br>CTG_MO<br>USE,sp P6<br>3261 ACT<br>G_HUMA<br>N,tr D2I7<br>P0 D2I7P<br>0_AILME,t<br>r F1PQL8<br> F1PQL8_<br>CANFA,tr <br>F6TII3 F6<br>TII3_MAC<br>MU,tr F7<br>AAK7 F7A<br>AK7_HOR<br>SE,tr F7DI<br>B7 F7DIB<br>7_MOND<br>O,tr F7I0 | eITA<br>LAPS<br>Tmk | 80% | 39.2 | 53.07128 | Ref | 0.014 | -0.52 | -0.19 | -0.16 | -0.49 | 0.13  | -0.5 | 22000 | 20700 | 15500 | 21900 | 24700 | 17100 | 27500 | 17600 | 596   | 1785 | 3 | 0.0171 | 9.6   |

|                                                                              |                                                                                                                                                                                                                                                                                                                                   |                     |     |      |          |     |       |       |       |        |       |       |       |       |       |       |       |       |       |       |       |       |        |   |        |       |
|------------------------------------------------------------------------------|-----------------------------------------------------------------------------------------------------------------------------------------------------------------------------------------------------------------------------------------------------------------------------------------------------------------------------------|---------------------|-----|------|----------|-----|-------|-------|-------|--------|-------|-------|-------|-------|-------|-------|-------|-------|-------|-------|-------|-------|--------|---|--------|-------|
| Actin, cytoplasmic 2<br>OS=Trichosurus<br>vulpecula<br>GN=ACTG1 PE=1<br>SV=1 | 7 ACTG_T<br>RIVU,sp P<br>63258 AC<br>TG_BOVI<br>N,sp P63<br>259 ACTG<br>_RAT,sp <br>P63260 A<br>CTG_MO<br>USE,sp P6<br>3261 ACT<br>G_HUMA<br>N,tr D2I7<br>P0 D2I7P<br>0_AILME,t<br>r F1PQL8<br> F1PQL8_<br>CANFA,tr <br>F6TII3 F6<br>TII3_MAC<br>MU,tr F7<br>AAK7 F7A<br>AK7_HOR<br>SE,tr F7DI<br>B7 F7DIB<br>7_MOND<br>O,tr F7I0 | eITA<br>LAPS<br>Tmk | 56% | 33   | 52.90153 | Ref | 0.11  | -0.33 | -0.38 | -0.18  | -0.51 | 0.14  | -0.65 | 7730  | 7490  | 5980  | 6520  | 8210  | 5710  | 9400  | 5380  | 893.5 | 1785   | 2 | 0.0125 | 7.027 |
| Actin, cytoplasmic 2<br>OS=Trichosurus<br>vulpecula<br>GN=ACTG1 PE=1<br>SV=1 | 7 ACTG_T<br>RIVU,sp P<br>63258 AC<br>TG_BOVI<br>N,sp P63<br>259 ACTG<br>_RAT,sp <br>P63260 A<br>CTG_MO<br>USE,sp P6<br>3261 ACT<br>G_HUMA<br>N,tr D2I7<br>P0 D2I7P<br>0_AILME,t<br>r F1PQL8<br> F1PQL8_<br>CANFA,tr <br>F6TII3 F6<br>TII3_MAC<br>MU,tr F7<br>AAK7 F7A<br>AK7_HOR<br>SE,tr F7DI<br>B7 F7DIB<br>7_MOND<br>O,tr F7I0 | g LTL<br>k          | 71% | 29.8 | 46.40968 | Ref | -0.53 | 0.18  | -0.35 | -0.093 | -0.17 | -0.44 | -0.32 | 36800 | 23200 | 41100 | 32000 | 42100 | 34900 | 30100 | 32500 | 418.3 | 1251.8 | 3 | 0.0014 | 1.139 |

|                                                                              |                                                                                                                                                                                                                                                                                                                                   |            |     |      |          |     |       |       |       |       |       |       |      |       |       |       |       |       |       |       |       |       |        |   |        |       |
|------------------------------------------------------------------------------|-----------------------------------------------------------------------------------------------------------------------------------------------------------------------------------------------------------------------------------------------------------------------------------------------------------------------------------|------------|-----|------|----------|-----|-------|-------|-------|-------|-------|-------|------|-------|-------|-------|-------|-------|-------|-------|-------|-------|--------|---|--------|-------|
| Actin, cytoplasmic 2<br>OS=Trichosurus<br>vulpecula<br>GN=ACTG1 PE=1<br>SV=1 | 7 ACTG_T<br>RIVU,sp P<br>63258 AC<br>TG_BOVI<br>N,sp P63<br>259 ACTG<br>_RAT,sp <br>P63260 A<br>CTG_MO<br>USE,sp P6<br>3261 ACT<br>G_HUMA<br>N,tr D2I7<br>P0 D2I7P<br>0_AILME,t<br>r F1PQL8<br> F1PQL8_<br>CANFA,tr <br>F6TII3 F6<br>TII3_MAC<br>MU,tr F7<br>AAK7 F7A<br>AK7_HOR<br>SE,tr F7DI<br>B7 F7DIB<br>7_MOND<br>O,tr F7IO | g LTL<br>k | 56% | 27.8 | 47.65691 | Ref | -0.44 | 0.031 | -0.33 | -0.14 | -0.12 | -0.38 | -0.2 | 33100 | 23300 | 35100 | 30700 | 38500 | 34200 | 29800 | 33400 | 626.9 | 1251.8 | 2 | 0.0256 | 20.44 |
| Actin, cytoplasmic 2<br>OS=Trichosurus<br>vulpecula<br>GN=ACTG1 PE=1<br>SV=1 | 7 ACTG_T<br>RIVU,sp P<br>63258 AC<br>TG_BOVI<br>N,sp P63<br>259 ACTG<br>_RAT,sp <br>P63260 A<br>CTG_MO<br>USE,sp P6<br>3261 ACT<br>G_HUMA<br>N,tr D2I7<br>P0 D2I7P<br>0_AILME,t<br>r F1PQL8<br> F1PQL8_<br>CANFA,tr <br>F6TII3 F6<br>TII3_MAC<br>MU,tr F7<br>AAK7 F7A<br>AK7_HOR<br>SE,tr F7DI<br>B7 F7DIB<br>7_MOND<br>O,tr F7IO | g LTL<br>k | 67% | 29   | 46.40968 | Ref | -0.36 | -0.11 | -0.34 | -0.22 | -0.16 | -0.23 | -0.3 | 5130  | 3410  | 4390  | 4200  | 5030  | 4590  | 4580  | 4330  | 418.3 | 1251.8 | 3 | #####  | 0.253 |

|                                                                              |                                                                                                                                                                                                                                                                                                                                   |                    |     |      |          |     |       |       |       |       |       |       |       |       |        |       |        |        |       |       |        |       |        |   |        |       |
|------------------------------------------------------------------------------|-----------------------------------------------------------------------------------------------------------------------------------------------------------------------------------------------------------------------------------------------------------------------------------------------------------------------------------|--------------------|-----|------|----------|-----|-------|-------|-------|-------|-------|-------|-------|-------|--------|-------|--------|--------|-------|-------|--------|-------|--------|---|--------|-------|
| Actin, cytoplasmic 2<br>OS=Trichosurus<br>vulpecula<br>GN=ACTG1 PE=1<br>SV=1 | 7 ACTG_T<br>RIVU,sp P<br>63258 AC<br>TG_BOVI<br>N,sp P63<br>259 ACTG<br>_RAT,sp <br>P63260 A<br>CTG_MO<br>USE,sp P6<br>3261 ACT<br>G_HUMA<br>N,tr D2I7<br>P0 D2I7P<br>O_AILME,t<br>r F1PQL8<br> F1PQL8_<br>CANFA,tr <br>F6TII3 F6<br>TII3_MAC<br>MU,tr F7<br>AAK7 F7A<br>AK7_HOR<br>SE,tr F7DI<br>B7 F7DIB<br>7_MOND<br>O,tr F7I0 | gYSF<br>TTTA<br>ER | 84% | 37.2 | 50.43276 | Ref | 0.23  | -0.24 | -0.3  | -0.29 | -0.69 | 0.057 | -0.85 | 4E+05 | 377000 | 3E+05 | 318000 | 353000 | 2E+05 | 4E+05 | 217000 | 718.9 | 1435.7 | 2 | 0.0096 | 6.695 |
| Actin, cytoplasmic 2<br>OS=Trichosurus<br>vulpecula<br>GN=ACTG1 PE=1<br>SV=1 | 7 ACTG_T<br>RIVU,sp P<br>63258 AC<br>TG_BOVI<br>N,sp P63<br>259 ACTG<br>_RAT,sp <br>P63260 A<br>CTG_MO<br>USE,sp P6<br>3261 ACT<br>G_HUMA<br>N,tr D2I7<br>P0 D2I7P<br>O_AILME,t<br>r F1PQL8<br> F1PQL8_<br>CANFA,tr <br>F6TII3 F6<br>TII3_MAC<br>MU,tr F7<br>AAK7 F7A<br>AK7_HOR<br>SE,tr F7DI<br>B7 F7DIB<br>7_MOND<br>O,tr F7I0 | gYSF<br>TTTA<br>ER | 85% | 37.7 | 50.40721 | Ref | 0.033 | -0.33 | -0.15 | -0.29 | -0.34 | -0.13 | -0.33 | 9190  | 9090   | 7650  | 9740   | 9750   | 8230  | 9940  | 8620   | 718.9 | 1435.7 | 2 | 0.0102 | 7.113 |



|                                                                              |                                                                                                                                                                                                                                                                                                                                   |                         |     |      |          |     |       |       |       |       |       |       |       |       |       |       |       |       |       |       |       |     |      |   |        |       |
|------------------------------------------------------------------------------|-----------------------------------------------------------------------------------------------------------------------------------------------------------------------------------------------------------------------------------------------------------------------------------------------------------------------------------|-------------------------|-----|------|----------|-----|-------|-------|-------|-------|-------|-------|-------|-------|-------|-------|-------|-------|-------|-------|-------|-----|------|---|--------|-------|
| Actin, cytoplasmic 2<br>OS=Trichosurus<br>vulpecula<br>GN=ACTG1 PE=1<br>SV=1 | 7 ACTG_T<br>RIVU,sp P<br>63258 AC<br>TG_BOVI<br>N,sp P63<br>259 ACTG<br>_RAT,sp <br>P63260 A<br>CTG_MO<br>USE,sp P6<br>3261 ACT<br>G_HUMA<br>N,tr D2I7<br>P0 D2I7P<br>0_AILME,t<br>r F1PQL8<br> F1PQL8_<br>CANFA,tr <br>F6TII3 F6<br>TII3_MAC<br>MU,tr F7<br>AAK7 F7A<br>AK7_HOR<br>SE,tr F7DI<br>B7 F7DIB<br>7_MOND<br>O,tr F7I0 | hQG<br>VMV<br>GMG<br>Qk | 92% | 47.2 | 53.37803 | Ref | -0.52 | -0.19 | -0.31 | -0.13 | -0.32 | -0.28 | -0.21 | 37900 | 19900 | 27300 | 28200 | 35200 | 27000 | 29000 | 30200 | 594 | 1779 | 3 | 0.0185 | 10.38 |
| Actin, cytoplasmic 2<br>OS=Trichosurus<br>vulpecula<br>GN=ACTG1 PE=1<br>SV=1 | 7 ACTG_T<br>RIVU,sp P<br>63258 AC<br>TG_BOVI<br>N,sp P63<br>259 ACTG<br>_RAT,sp <br>P63260 A<br>CTG_MO<br>USE,sp P6<br>3261 ACT<br>G_HUMA<br>N,tr D2I7<br>P0 D2I7P<br>0_AILME,t<br>r F1PQL8<br> F1PQL8_<br>CANFA,tr <br>F6TII3 F6<br>TII3_MAC<br>MU,tr F7<br>AAK7 F7A<br>AK7_HOR<br>SE,tr F7DI<br>B7 F7DIB<br>7_MOND<br>O,tr F7I0 | hQG<br>VMV<br>GMG<br>Qk | 95% | 55   | 53.39978 | Ref | -0.55 | 0.041 | -0.52 | -0.16 | -0.23 | -0.26 | -0.34 | 78900 | 40800 | 66600 | 50700 | 72000 | 59600 | 61000 | 57200 | 594 | 1779 | 3 | 0.0156 | 8.741 |

|                                                                              |                                                                                                                                                                                                                                                                                                                                   |                         |     |      |          |     |       |       |       |        |       |       |       |       |       |       |       |       |       |       |       |       |      |   |        |       |
|------------------------------------------------------------------------------|-----------------------------------------------------------------------------------------------------------------------------------------------------------------------------------------------------------------------------------------------------------------------------------------------------------------------------------|-------------------------|-----|------|----------|-----|-------|-------|-------|--------|-------|-------|-------|-------|-------|-------|-------|-------|-------|-------|-------|-------|------|---|--------|-------|
| Actin, cytoplasmic 2<br>OS=Trichosurus<br>vulpecula<br>GN=ACTG1 PE=1<br>SV=1 | 7 ACTG_T<br>RIVU,sp P<br>63258 AC<br>TG_BOVI<br>N,sp P63<br>259 ACTG<br>_RAT,sp <br>P63260 A<br>CTG_MO<br>USE,sp P6<br>3261 ACT<br>G_HUMA<br>N,tr D2I7<br>P0 D2I7P<br>0_AILME,t<br>r F1PQL8<br> F1PQL8_<br>CANFA,tr <br>F6TII3 F6<br>TII3_MAC<br>MU,tr F7<br>AAK7 F7A<br>AK7_HOR<br>SE,tr F7DI<br>B7 F7DIB<br>7_MOND<br>O,tr F7I0 | hQG<br>VMV<br>GMG<br>Qk | 95% | 62.6 | 53.37264 | Ref | -0.59 | -0.01 | -0.53 | -0.072 | -0.17 | -0.49 | -0.21 | 64000 | 31700 | 51600 | 40200 | 61000 | 49800 | 41600 | 50200 | 594   | 1779 | 3 | 0.0192 | 10.8  |
| Actin, cytoplasmic 2<br>OS=Trichosurus<br>vulpecula<br>GN=ACTG1 PE=1<br>SV=1 | 7 ACTG_T<br>RIVU,sp P<br>63258 AC<br>TG_BOVI<br>N,sp P63<br>259 ACTG<br>_RAT,sp <br>P63260 A<br>CTG_MO<br>USE,sp P6<br>3261 ACT<br>G_HUMA<br>N,tr D2I7<br>P0 D2I7P<br>0_AILME,t<br>r F1PQL8<br> F1PQL8_<br>CANFA,tr <br>F6TII3 F6<br>TII3_MAC<br>MU,tr F7<br>AAK7 F7A<br>AK7_HOR<br>SE,tr F7DI<br>B7 F7DIB<br>7_MOND<br>O,tr F7I0 | hQG<br>VMV<br>GMG<br>Qk | 59% | 32.4 | 53.38156 | Ref | -0.45 | -0.1  | -0.44 | -0.26  | -0.15 | -0.3  | -0.03 | 23600 | 15000 | 20700 | 18400 | 22900 | 21700 | 20300 | 24400 | 445.7 | 1779 | 4 | 0.0169 | 9.475 |

|                                                                              |                                                                                                                                                                                                                                                                                                                                   |                         |     |      |          |     |       |       |       |       |       |       |       |       |       |       |       |       |       |       |       |       |      |   |        |       |
|------------------------------------------------------------------------------|-----------------------------------------------------------------------------------------------------------------------------------------------------------------------------------------------------------------------------------------------------------------------------------------------------------------------------------|-------------------------|-----|------|----------|-----|-------|-------|-------|-------|-------|-------|-------|-------|-------|-------|-------|-------|-------|-------|-------|-------|------|---|--------|-------|
| Actin, cytoplasmic 2<br>OS=Trichosurus<br>vulpecula<br>GN=ACTG1 PE=1<br>SV=1 | 7 ACTG_T<br>RIVU,sp P<br>63258 AC<br>TG_BOVI<br>N,sp P63<br>259 ACTG<br>_RAT,sp <br>P63260 A<br>CTG_MO<br>USE,sp P6<br>3261 ACT<br>G_HUMA<br>N,tr D2I7<br>P0 D2I7P<br>0_AILME,t<br>r F1PQL8<br> F1PQL8_<br>CANFA,tr <br>F6TII3 F6<br>TII3_MAC<br>MU,tr F7<br>AAK7 F7A<br>AK7_HOR<br>SE,tr F7DI<br>B7 F7DIB<br>7_MOND<br>O,tr F7I0 | hQG<br>VMV<br>GMG<br>Qk | 95% | 54.8 | 53.38156 | Ref | -0.67 | 0.16  | -0.52 | -0.12 | -0.14 | -0.28 | -0.23 | 5160  | 2860  | 5480  | 3840  | 5610  | 4830  | 4570  | 4690  | 890.5 | 1779 | 2 | 0.0168 | 9.446 |
| Actin, cytoplasmic 2<br>OS=Trichosurus<br>vulpecula<br>GN=ACTG1 PE=1<br>SV=1 | 7 ACTG_T<br>RIVU,sp P<br>63258 AC<br>TG_BOVI<br>N,sp P63<br>259 ACTG<br>_RAT,sp <br>P63260 A<br>CTG_MO<br>USE,sp P6<br>3261 ACT<br>G_HUMA<br>N,tr D2I7<br>P0 D2I7P<br>0_AILME,t<br>r F1PQL8<br> F1PQL8_<br>CANFA,tr <br>F6TII3 F6<br>TII3_MAC<br>MU,tr F7<br>AAK7 F7A<br>AK7_HOR<br>SE,tr F7DI<br>B7 F7DIB<br>7_MOND<br>O,tr F7I0 | hQG<br>VMV<br>GMG<br>Qk | 91% | 44   | 53.36868 | Ref | -0.69 | -0.18 | -0.53 | -0.09 | -0.17 | -0.29 | -0.03 | 36700 | 17800 | 27500 | 24100 | 36100 | 29900 | 28700 | 34000 | 890.5 | 1779 | 2 | 0.0179 | 10.06 |

|                                                                              |                                                                                                                                                                                                                                                                                                                                   |                         |     |      |          |     |       |       |       |        |       |       |       |       |        |       |        |        |       |       |        |     |      |   |        |       |
|------------------------------------------------------------------------------|-----------------------------------------------------------------------------------------------------------------------------------------------------------------------------------------------------------------------------------------------------------------------------------------------------------------------------------|-------------------------|-----|------|----------|-----|-------|-------|-------|--------|-------|-------|-------|-------|--------|-------|--------|--------|-------|-------|--------|-----|------|---|--------|-------|
| Actin, cytoplasmic 2<br>OS=Trichosurus<br>vulpecula<br>GN=ACTG1 PE=1<br>SV=1 | 7 ACTG_T<br>RIVU,sp P<br>63258 AC<br>TG_BOVI<br>N,sp P63<br>259 ACTG<br>_RAT,sp <br>P63260 A<br>CTG_MO<br>USE,sp P6<br>3261 ACT<br>G_HUMA<br>N,tr D2I7<br>P0 D2I7P<br>0_AILME,t<br>r F1PQL8<br> F1PQL8_<br>CANFA,tr <br>F6TII3 F6<br>TII3_MAC<br>MU,tr F7<br>AAK7 F7A<br>AK7_HOR<br>SE,tr F7DI<br>B7 F7DIB<br>7_MOND<br>O,tr F7I0 | hQG<br>VMV<br>GMG<br>Qk | 93% | 49.3 | 53.41365 | Ref | -0.64 | -0.26 | -0.39 | -0.071 | -0.22 | -0.49 | -0.14 | 2E+05 | 100000 | 1E+05 | 145000 | 200000 | 2E+05 | 1E+05 | 172000 | 594 | 1779 | 3 | 0.0161 | 9.045 |
| Actin, cytoplasmic 2<br>OS=Trichosurus<br>vulpecula<br>GN=ACTG1 PE=1<br>SV=1 | 7 ACTG_T<br>RIVU,sp P<br>63258 AC<br>TG_BOVI<br>N,sp P63<br>259 ACTG<br>_RAT,sp <br>P63260 A<br>CTG_MO<br>USE,sp P6<br>3261 ACT<br>G_HUMA<br>N,tr D2I7<br>P0 D2I7P<br>0_AILME,t<br>r F1PQL8<br> F1PQL8_<br>CANFA,tr <br>F6TII3 F6<br>TII3_MAC<br>MU,tr F7<br>AAK7 F7A<br>AK7_HOR<br>SE,tr F7DI<br>B7 F7DIB<br>7_MOND<br>O,tr F7I0 | hQG<br>VMV<br>GMG<br>Qk | 79% | 39.1 | 53.4127  | Ref | -0.63 | -0.23 | -0.42 | -0.06  | 0.072 | -0.52 | -0.13 | 1E+05 | 56800  | 81500 | 80500  | 114000 | 1E+05 | 75200 | 97500  | 594 | 1779 | 3 | 0.0159 | 8.944 |

|                                                                              |                                                                                                                                                                                                                                                                                                                                   |                         |     |      |          |     |       |       |       |        |       |       |       |       |        |       |        |        |       |       |        |       |      |   |        |       |
|------------------------------------------------------------------------------|-----------------------------------------------------------------------------------------------------------------------------------------------------------------------------------------------------------------------------------------------------------------------------------------------------------------------------------|-------------------------|-----|------|----------|-----|-------|-------|-------|--------|-------|-------|-------|-------|--------|-------|--------|--------|-------|-------|--------|-------|------|---|--------|-------|
| Actin, cytoplasmic 2<br>OS=Trichosurus<br>vulpecula<br>GN=ACTG1 PE=1<br>SV=1 | 7 ACTG_T<br>RIVU,sp P<br>63258 AC<br>TG_BOVI<br>N,sp P63<br>259 ACTG<br>_RAT,sp <br>P63260 A<br>CTG_MO<br>USE,sp P6<br>3261 ACT<br>G_HUMA<br>N,tr D2I7<br>P0 D2I7P<br>0_AILME,t<br>r F1PQL8<br> F1PQL8_<br>CANFA,tr <br>F6TII3 F6<br>TII3_MAC<br>MU,tr F7<br>AAK7 F7A<br>AK7_HOR<br>SE,tr F7DI<br>B7 F7DIB<br>7_MOND<br>O,tr F7I0 | hQG<br>VMV<br>GMG<br>Qk | 95% | 58.9 | 53.38793 | Ref | -0.91 | -0.04 | -0.42 | -0.008 | -0.21 | -0.58 | -0.09 | 5E+05 | 181000 | 4E+05 | 309000 | 454000 | 3E+05 | 3E+05 | 388000 | 594   | 1779 | 3 | 0.015  | 8.421 |
| Actin, cytoplasmic 2<br>OS=Trichosurus<br>vulpecula<br>GN=ACTG1 PE=1<br>SV=1 | 7 ACTG_T<br>RIVU,sp P<br>63258 AC<br>TG_BOVI<br>N,sp P63<br>259 ACTG<br>_RAT,sp <br>P63260 A<br>CTG_MO<br>USE,sp P6<br>3261 ACT<br>G_HUMA<br>N,tr D2I7<br>P0 D2I7P<br>0_AILME,t<br>r F1PQL8<br> F1PQL8_<br>CANFA,tr <br>F6TII3 F6<br>TII3_MAC<br>MU,tr F7<br>AAK7 F7A<br>AK7_HOR<br>SE,tr F7DI<br>B7 F7DIB<br>7_MOND<br>O,tr F7I0 | hQG<br>VMV<br>GMG<br>Qk | 95% | 53.4 | 53.36742 | Ref | -0.68 | 0.04  | -0.42 | -0.018 | -0.18 | -0.31 | -0.28 | 24300 | 12800  | 22800 | 18600  | 27100  | 21100 | 20200 | 20500  | 890.5 | 1779 | 2 | 0.0111 | 6.232 |

|                                                                              |                                                                                                                                                                                                                                                                                                                                   |                         |     |      |          |     |       |       |       |        |       |       |       |       |        |       |        |        |       |       |        |       |      |   |        |       |
|------------------------------------------------------------------------------|-----------------------------------------------------------------------------------------------------------------------------------------------------------------------------------------------------------------------------------------------------------------------------------------------------------------------------------|-------------------------|-----|------|----------|-----|-------|-------|-------|--------|-------|-------|-------|-------|--------|-------|--------|--------|-------|-------|--------|-------|------|---|--------|-------|
| Actin, cytoplasmic 2<br>OS=Trichosurus<br>vulpecula<br>GN=ACTG1 PE=1<br>SV=1 | 7 ACTG_T<br>RIVU,sp P<br>63258 AC<br>TG_BOVI<br>N,sp P63<br>259 ACTG<br>_RAT,sp <br>P63260 A<br>CTG_MO<br>USE,sp P6<br>3261 ACT<br>G_HUMA<br>N,tr D2I7<br>P0 D2I7P<br>0_AILME,t<br>r F1PQL8<br> F1PQL8_<br>CANFA,tr <br>F6TII3 F6<br>TII3_MAC<br>MU,tr F7<br>AAK7 F7A<br>AK7_HOR<br>SE,tr F7DI<br>B7 F7DIB<br>7_MOND<br>O,tr F7I0 | hQG<br>VMV<br>GMG<br>Qk | 92% | 47.5 | 53.39978 | Ref | -0.61 | -0    | -0.54 | -0.043 | -0.16 | -0.51 | -0.36 | 4E+05 | 192000 | 3E+05 | 246000 | 383000 | 3E+05 | 3E+05 | 278000 | 594   | 1779 | 3 | 0.0156 | 8.741 |
| Actin, cytoplasmic 2<br>OS=Trichosurus<br>vulpecula<br>GN=ACTG1 PE=1<br>SV=1 | 7 ACTG_T<br>RIVU,sp P<br>63258 AC<br>TG_BOVI<br>N,sp P63<br>259 ACTG<br>_RAT,sp <br>P63260 A<br>CTG_MO<br>USE,sp P6<br>3261 ACT<br>G_HUMA<br>N,tr D2I7<br>P0 D2I7P<br>0_AILME,t<br>r F1PQL8<br> F1PQL8_<br>CANFA,tr <br>F6TII3 F6<br>TII3_MAC<br>MU,tr F7<br>AAK7 F7A<br>AK7_HOR<br>SE,tr F7DI<br>B7 F7DIB<br>7_MOND<br>O,tr F7I0 | hQG<br>VMV<br>GMG<br>Qk | 79% | 37.2 | 53.38658 | Ref | -0.73 | -0.17 | -0.69 | -0.073 | -0.07 | -0.21 | -0.14 | 2E+05 | 98400  | 2E+05 | 123000 | 208000 | 2E+05 | 2E+05 | 181000 | 445.7 | 1779 | 4 | 0.0149 | 8.374 |

|                                                                              |                                                                                                                                                                                                                                                                                                                                   |                         |     |      |          |     |       |       |       |        |       |       |       |       |      |      |      |       |      |      |      |       |      |   |        |       |
|------------------------------------------------------------------------------|-----------------------------------------------------------------------------------------------------------------------------------------------------------------------------------------------------------------------------------------------------------------------------------------------------------------------------------|-------------------------|-----|------|----------|-----|-------|-------|-------|--------|-------|-------|-------|-------|------|------|------|-------|------|------|------|-------|------|---|--------|-------|
| Actin, cytoplasmic 2<br>OS=Trichosurus<br>vulpecula<br>GN=ACTG1 PE=1<br>SV=1 | 7 ACTG_T<br>RIVU,sp P<br>63258 AC<br>TG_BOVI<br>N,sp P63<br>259 ACTG<br>_RAT,sp <br>P63260 A<br>CTG_MO<br>USE,sp P6<br>3261 ACT<br>G_HUMA<br>N,tr D2I7<br>P0 D2I7P<br>0_AILME,t<br>r F1PQL8<br> F1PQL8_<br>CANFA,tr <br>F6TII3 F6<br>TII3_MAC<br>MU,tr F7<br>AAK7 F7A<br>AK7_HOR<br>SE,tr F7DI<br>B7 F7DIB<br>7_MOND<br>O,tr F7I0 | hQG<br>VMV<br>GMG<br>Qk | 78% | 38.1 | 53.4347  | Ref | -0.63 | 0.024 | -0.42 | -0.056 | -0.16 | -0.36 | -0.24 | 10100 | 5440 | 9310 | 7690 | 10900 | 8870 | 8050 | 8660 | 890.5 | 1779 | 2 | 0.0102 | 5.749 |
| Actin, cytoplasmic 2<br>OS=Trichosurus<br>vulpecula<br>GN=ACTG1 PE=1<br>SV=1 | 7 ACTG_T<br>RIVU,sp P<br>63258 AC<br>TG_BOVI<br>N,sp P63<br>259 ACTG<br>_RAT,sp <br>P63260 A<br>CTG_MO<br>USE,sp P6<br>3261 ACT<br>G_HUMA<br>N,tr D2I7<br>P0 D2I7P<br>0_AILME,t<br>r F1PQL8<br> F1PQL8_<br>CANFA,tr <br>F6TII3 F6<br>TII3_MAC<br>MU,tr F7<br>AAK7 F7A<br>AK7_HOR<br>SE,tr F7DI<br>B7 F7DIB<br>7_MOND<br>O,tr F7I0 | hQG<br>VMV<br>GMG<br>Qk | 91% | 46.9 | 53.31596 | Ref | -0.32 | -0.13 | -0.47 | -0.23  | -0.08 | -0.26 | -0.19 | 6190  | 4400 | 5430 | 4820 | 6290  | 6090 | 5600 | 5850 | 594   | 1779 | 3 | 0.0029 | 1.646 |

|                                                                              |                                                                                                                                                                                                                                                                                                                                   |                         |     |      |          |     |       |       |       |       |       |       |      |       |       |       |       |       |       |       |       |       |      |   |        |       |
|------------------------------------------------------------------------------|-----------------------------------------------------------------------------------------------------------------------------------------------------------------------------------------------------------------------------------------------------------------------------------------------------------------------------------|-------------------------|-----|------|----------|-----|-------|-------|-------|-------|-------|-------|------|-------|-------|-------|-------|-------|-------|-------|-------|-------|------|---|--------|-------|
| Actin, cytoplasmic 2<br>OS=Trichosurus<br>vulpecula<br>GN=ACTG1 PE=1<br>SV=1 | 7 ACTG_T<br>RIVU,sp P<br>63258 AC<br>TG_BOVI<br>N,sp P63<br>259 ACTG<br>_RAT,sp <br>P63260 A<br>CTG_MO<br>USE,sp P6<br>3261 ACT<br>G_HUMA<br>N,tr D2I7<br>P0 D2I7P<br>0_AILME,t<br>r F1PQL8<br> F1PQL8_<br>CANFA,tr <br>F6TII3 F6<br>TII3_MAC<br>MU,tr F7<br>AAK7 F7A<br>AK7_HOR<br>SE,tr F7DI<br>B7 F7DIB<br>7_MOND<br>O,tr F7I0 | hQG<br>VMV<br>GMG<br>Qk | 90% | 45.2 | 53.30536 | Ref | -0.18 | -0.06 | -0.51 | -0.29 | -0.22 | -0.43 | -0.3 | 4430  | 2950  | 3470  | 2860  | 3660  | 3340  | 3030  | 3290  | 594   | 1779 | 3 | #####  | 0.297 |
| Actin, cytoplasmic 2<br>OS=Trichosurus<br>vulpecula<br>GN=ACTG1 PE=1<br>SV=1 | 7 ACTG_T<br>RIVU,sp P<br>63258 AC<br>TG_BOVI<br>N,sp P63<br>259 ACTG<br>_RAT,sp <br>P63260 A<br>CTG_MO<br>USE,sp P6<br>3261 ACT<br>G_HUMA<br>N,tr D2I7<br>P0 D2I7P<br>0_AILME,t<br>r F1PQL8<br> F1PQL8_<br>CANFA,tr <br>F6TII3 F6<br>TII3_MAC<br>MU,tr F7<br>AAK7 F7A<br>AK7_HOR<br>SE,tr F7DI<br>B7 F7DIB<br>7_MOND<br>O,tr F7I0 | hQG<br>VmV<br>GMG<br>Qk | 76% | 38.2 | 53.25544 | Ref | -0.67 | 0.17  | -0.8  | -0.21 | -0.27 | -0.38 | 0.25 | 58800 | 33900 | 65600 | 37600 | 62400 | 52300 | 50400 | 77600 | 599.3 | 1795 | 3 | 0.0191 | 10.63 |



|                                                                              |                                                                                                                                                                                                                                                                                                                                   |                         |     |      |          |     |       |      |       |       |       |       |       |       |        |       |        |        |       |       |        |       |      |   |        |       |
|------------------------------------------------------------------------------|-----------------------------------------------------------------------------------------------------------------------------------------------------------------------------------------------------------------------------------------------------------------------------------------------------------------------------------|-------------------------|-----|------|----------|-----|-------|------|-------|-------|-------|-------|-------|-------|--------|-------|--------|--------|-------|-------|--------|-------|------|---|--------|-------|
| Actin, cytoplasmic 2<br>OS=Trichosurus<br>vulpecula<br>GN=ACTG1 PE=1<br>SV=1 | 7 ACTG_T<br>RIVU,sp P<br>63258 AC<br>TG_BOVI<br>N,sp P63<br>259 ACTG<br>_RAT,sp <br>P63260 A<br>CTG_MO<br>USE,sp P6<br>3261 ACT<br>G_HUMA<br>N,tr D2I7<br>P0 D2I7P<br>0_AILME,t<br>r F1PQL8<br> F1PQL8_<br>CANFA,tr <br>F6TII3 F6<br>TII3_MAC<br>MU,tr F7<br>AAK7 F7A<br>AK7_HOR<br>SE,tr F7DI<br>B7 F7DIB<br>7_MOND<br>O,tr F7I0 | hQG<br>VmV<br>GMG<br>Qk | 75% | 37.9 | 53.35187 | Ref | -0.92 | 0.17 | -0.49 | -0.14 | -0.08 | -0.42 | -0.16 | 1E+05 | 57700  | 1E+05 | 94900  | 133000 | 1E+05 | 1E+05 | 119000 | 599.3 | 1795 | 3 | 0.0167 | 9.306 |
| Actin, cytoplasmic 2<br>OS=Trichosurus<br>vulpecula<br>GN=ACTG1 PE=1<br>SV=1 | 7 ACTG_T<br>RIVU,sp P<br>63258 AC<br>TG_BOVI<br>N,sp P63<br>259 ACTG<br>_RAT,sp <br>P63260 A<br>CTG_MO<br>USE,sp P6<br>3261 ACT<br>G_HUMA<br>N,tr D2I7<br>P0 D2I7P<br>0_AILME,t<br>r F1PQL8<br> F1PQL8_<br>CANFA,tr <br>F6TII3 F6<br>TII3_MAC<br>MU,tr F7<br>AAK7 F7A<br>AK7_HOR<br>SE,tr F7DI<br>B7 F7DIB<br>7_MOND<br>O,tr F7I0 | hQG<br>VmV<br>GMG<br>Qk | 94% | 50.9 | 53.31217 | Ref | -0.75 | -0   | -0.39 | 0.059 | -0.07 | -0.37 | -0.45 | 6E+05 | 292000 | 5E+05 | 454000 | 685000 | 5E+05 | 5E+05 | 437000 | 599.3 | 1795 | 3 | 0.0129 | 7.167 |

|                                                                              |                                                                                                                                                                                                                                                                                                                                   |                         |     |      |          |     |       |       |       |        |       |       |       |       |       |       |       |       |       |       |       |       |      |   |        |       |
|------------------------------------------------------------------------------|-----------------------------------------------------------------------------------------------------------------------------------------------------------------------------------------------------------------------------------------------------------------------------------------------------------------------------------|-------------------------|-----|------|----------|-----|-------|-------|-------|--------|-------|-------|-------|-------|-------|-------|-------|-------|-------|-------|-------|-------|------|---|--------|-------|
| Actin, cytoplasmic 2<br>OS=Trichosurus<br>vulpecula<br>GN=ACTG1 PE=1<br>SV=1 | 7 ACTG_T<br>RIVU,sp P<br>63258 AC<br>TG_BOVI<br>N,sp P63<br>259 ACTG<br>_RAT,sp <br>P63260 A<br>CTG_MO<br>USE,sp P6<br>3261 ACT<br>G_HUMA<br>N,tr D2I7<br>P0 D2I7P<br>0_AILME,t<br>r F1PQL8<br> F1PQL8_<br>CANFA,tr <br>F6TII3 F6<br>TII3_MAC<br>MU,tr F7<br>AAK7 F7A<br>AK7_HOR<br>SE,tr F7DI<br>B7 F7DIB<br>7_MOND<br>O,tr F7I0 | hQG<br>VMV<br>GmG<br>Qk | 83% | 40.9 | 53.25733 | Ref | -0.73 | 0.066 | -0.51 | -0.088 | -0.22 | -0.37 | -0.01 | 38800 | 20200 | 38000 | 28500 | 42200 | 33600 | 31700 | 40400 | 599.3 | 1795 | 3 | 0.0187 | 10.42 |
| Actin, cytoplasmic 2<br>OS=Trichosurus<br>vulpecula<br>GN=ACTG1 PE=1<br>SV=1 | 7 ACTG_T<br>RIVU,sp P<br>63258 AC<br>TG_BOVI<br>N,sp P63<br>259 ACTG<br>_RAT,sp <br>P63260 A<br>CTG_MO<br>USE,sp P6<br>3261 ACT<br>G_HUMA<br>N,tr D2I7<br>P0 D2I7P<br>0_AILME,t<br>r F1PQL8<br> F1PQL8_<br>CANFA,tr <br>F6TII3 F6<br>TII3_MAC<br>MU,tr F7<br>AAK7 F7A<br>AK7_HOR<br>SE,tr F7DI<br>B7 F7DIB<br>7_MOND<br>O,tr F7I0 | hQG<br>VMV<br>GmG<br>Qk | 91% | 46   | 53.25745 | Ref | -0.62 | 0.041 | -0.34 | -0.062 | -0.1  | -0.4  | -0.29 | 40300 | 22900 | 39300 | 33900 | 45300 | 38600 | 32600 | 35000 | 599.3 | 1795 | 3 | 0.0185 | 10.32 |

|                                                                              |                                                                                                                                                                                                                                                                                                                                   |                         |     |      |          |     |       |       |       |        |       |       |       |       |       |       |       |        |       |       |        |       |      |   |        |       |
|------------------------------------------------------------------------------|-----------------------------------------------------------------------------------------------------------------------------------------------------------------------------------------------------------------------------------------------------------------------------------------------------------------------------------|-------------------------|-----|------|----------|-----|-------|-------|-------|--------|-------|-------|-------|-------|-------|-------|-------|--------|-------|-------|--------|-------|------|---|--------|-------|
| Actin, cytoplasmic 2<br>OS=Trichosurus<br>vulpecula<br>GN=ACTG1 PE=1<br>SV=1 | 7 ACTG_T<br>RIVU,sp P<br>63258 AC<br>TG_BOVI<br>N,sp P63<br>259 ACTG<br>_RAT,sp <br>P63260 A<br>CTG_MO<br>USE,sp P6<br>3261 ACT<br>G_HUMA<br>N,tr D2I7<br>P0 D2I7P<br>0_AILME,t<br>r F1PQL8<br> F1PQL8_<br>CANFA,tr <br>F6TII3 F6<br>TII3_MAC<br>MU,tr F7<br>AAK7 F7A<br>AK7_HOR<br>SE,tr F7DI<br>B7 F7DIB<br>7_MOND<br>O,tr F7I0 | hQG<br>VMV<br>GmG<br>Qk | 84% | 41.4 | 53.35187 | Ref | -0.98 | 0.081 | -0.39 | -0.059 | -0.24 | -0.27 | -0.17 | 81000 | 33100 | 74800 | 60700 | 84000  | 64700 | 66000 | 70500  | 599.3 | 1795 | 3 | 0.0167 | 9.306 |
| Actin, cytoplasmic 2<br>OS=Trichosurus<br>vulpecula<br>GN=ACTG1 PE=1<br>SV=1 | 7 ACTG_T<br>RIVU,sp P<br>63258 AC<br>TG_BOVI<br>N,sp P63<br>259 ACTG<br>_RAT,sp <br>P63260 A<br>CTG_MO<br>USE,sp P6<br>3261 ACT<br>G_HUMA<br>N,tr D2I7<br>P0 D2I7P<br>0_AILME,t<br>r F1PQL8<br> F1PQL8_<br>CANFA,tr <br>F6TII3 F6<br>TII3_MAC<br>MU,tr F7<br>AAK7 F7A<br>AK7_HOR<br>SE,tr F7DI<br>B7 F7DIB<br>7_MOND<br>O,tr F7I0 | hQG<br>VMV<br>GmG<br>Qk | 54% | 31.6 | 53.30578 | Ref | -0.36 | 0.017 | -0.63 | -0.31  | 0.029 | -0.35 | -0.36 | 1E+05 | 90500 | 1E+05 | 92000 | 127000 | 1E+05 | 1E+05 | 110000 | 449.7 | 1795 | 4 | 0.0149 | 8.295 |

|                                                                              |                                                                                                                                                                                                                                                                                                                                   |                         |     |      |          |     |       |      |       |       |       |       |       |       |       |       |       |       |       |       |       |       |      |   |        |       |
|------------------------------------------------------------------------------|-----------------------------------------------------------------------------------------------------------------------------------------------------------------------------------------------------------------------------------------------------------------------------------------------------------------------------------|-------------------------|-----|------|----------|-----|-------|------|-------|-------|-------|-------|-------|-------|-------|-------|-------|-------|-------|-------|-------|-------|------|---|--------|-------|
| Actin, cytoplasmic 2<br>OS=Trichosurus<br>vulpecula<br>GN=ACTG1 PE=1<br>SV=1 | 7 ACTG_T<br>RIVU,sp P<br>63258 AC<br>TG_BOVI<br>N,sp P63<br>259 ACTG<br>_RAT,sp <br>P63260 A<br>CTG_MO<br>USE,sp P6<br>3261 ACT<br>G_HUMA<br>N,tr D2I7<br>P0 D2I7P<br>0_AILME,t<br>r F1PQL8<br> F1PQL8_<br>CANFA,tr <br>F6TII3 F6<br>TII3_MAC<br>MU,tr F7<br>AAK7 F7A<br>AK7_HOR<br>SE,tr F7DI<br>B7 F7DIB<br>7_MOND<br>O,tr F7I0 | hQG<br>VMV<br>GmG<br>Qk | 89% | 44.5 | 53.28559 | Ref | -0.39 | 0.17 | -0.42 | -0.36 | -0.12 | -0.32 | -0.18 | 19300 | 14100 | 22500 | 16800 | 19400 | 19900 | 18100 | 19800 | 599.3 | 1795 | 3 | 0.0138 | 7.668 |
| Actin, cytoplasmic 2<br>OS=Trichosurus<br>vulpecula<br>GN=ACTG1 PE=1<br>SV=1 | 7 ACTG_T<br>RIVU,sp P<br>63258 AC<br>TG_BOVI<br>N,sp P63<br>259 ACTG<br>_RAT,sp <br>P63260 A<br>CTG_MO<br>USE,sp P6<br>3261 ACT<br>G_HUMA<br>N,tr D2I7<br>P0 D2I7P<br>0_AILME,t<br>r F1PQL8<br> F1PQL8_<br>CANFA,tr <br>F6TII3 F6<br>TII3_MAC<br>MU,tr F7<br>AAK7 F7A<br>AK7_HOR<br>SE,tr F7DI<br>B7 F7DIB<br>7_MOND<br>O,tr F7I0 | hQG<br>VMV<br>GmG<br>Qk | 66% | 35.2 | 53.39294 | Ref | -0.69 | 0.16 | -0.46 | -0.17 | -0.09 | -0.38 | -0.29 | 8060  | 4080  | 7980  | 5850  | 7860  | 7300  | 6220  | 6550  | 898.5 | 1795 | 2 | 0.0091 | 5.082 |

|                                                                              |                                                                                                                                                                                                                                                                                                                                   |                         |     |      |          |     |       |       |       |       |       |       |       |      |      |      |      |      |      |      |      |       |      |   |        |       |
|------------------------------------------------------------------------------|-----------------------------------------------------------------------------------------------------------------------------------------------------------------------------------------------------------------------------------------------------------------------------------------------------------------------------------|-------------------------|-----|------|----------|-----|-------|-------|-------|-------|-------|-------|-------|------|------|------|------|------|------|------|------|-------|------|---|--------|-------|
| Actin, cytoplasmic 2<br>OS=Trichosurus<br>vulpecula<br>GN=ACTG1 PE=1<br>SV=1 | 7 ACTG_T<br>RIVU,sp P<br>63258 AC<br>TG_BOVI<br>N,sp P63<br>259 ACTG<br>_RAT,sp <br>P63260 A<br>CTG_MO<br>USE,sp P6<br>3261 ACT<br>G_HUMA<br>N,tr D2I7<br>P0 D2I7P<br>0_AILME,t<br>r F1PQL8<br> F1PQL8_<br>CANFA,tr <br>F6TII3 F6<br>TII3_MAC<br>MU,tr F7<br>AAK7 F7A<br>AK7_HOR<br>SE,tr F7DI<br>B7 F7DIB<br>7_MOND<br>O,tr F7I0 | hQG<br>VMV<br>GmG<br>Qk | 71% | 36.2 | 53.38518 | Ref | -0.77 | -0.07 | -0.39 | -0.11 | -0.06 | -0.26 | -0.25 | 2790 | 1330 | 2330 | 2100 | 2820 | 2540 | 2310 | 2310 | 898.5 | 1795 | 2 | 0.0073 | 4.068 |
| Actin, cytoplasmic 2<br>OS=Trichosurus<br>vulpecula<br>GN=ACTG1 PE=1<br>SV=1 | 7 ACTG_T<br>RIVU,sp P<br>63258 AC<br>TG_BOVI<br>N,sp P63<br>259 ACTG<br>_RAT,sp <br>P63260 A<br>CTG_MO<br>USE,sp P6<br>3261 ACT<br>G_HUMA<br>N,tr D2I7<br>P0 D2I7P<br>0_AILME,t<br>r F1PQL8<br> F1PQL8_<br>CANFA,tr <br>F6TII3 F6<br>TII3_MAC<br>MU,tr F7<br>AAK7 F7A<br>AK7_HOR<br>SE,tr F7DI<br>B7 F7DIB<br>7_MOND<br>O,tr F7I0 | hQG<br>VMV<br>GMG<br>qk | 95% | 50.2 | 53.46079 | Ref | -0.6  | -0.05 | -0.39 | -0.08 | -0.12 | -0.32 | -0.09 | 4340 | 2650 | 4200 | 3720 | 5090 | 4330 | 3950 | 4570 | 891   | 1780 | 2 | 0.0046 | 2.595 |

|                                                                              |                                                                                                                                                                                                                                                                                                                                   |                                                |     |      |          |     |       |       |       |       |       |       |       |      |      |      |      |      |      |      |      |       |        |   |        |       |
|------------------------------------------------------------------------------|-----------------------------------------------------------------------------------------------------------------------------------------------------------------------------------------------------------------------------------------------------------------------------------------------------------------------------------|------------------------------------------------|-----|------|----------|-----|-------|-------|-------|-------|-------|-------|-------|------|------|------|------|------|------|------|------|-------|--------|---|--------|-------|
| Actin, cytoplasmic 2<br>OS=Trichosurus<br>vulpecula<br>GN=ACTG1 PE=1<br>SV=1 | 7 ACTG_T<br>RIVU,sp P<br>63258 AC<br>TG_BOVI<br>N,sp P63<br>259 ACTG<br>_RAT,sp <br>P63260 A<br>CTG_MO<br>USE,sp P6<br>3261 ACT<br>G_HUMA<br>N,tr D2I7<br>P0 D2I7P<br>0_AILME,t<br>r F1PQL8<br> F1PQL8_<br>CANFA,tr <br>F6TII3 F6<br>TII3_MAC<br>MU,tr F7<br>AAK7 F7A<br>AK7_HOR<br>SE,tr F7DI<br>B7 F7DIB<br>7_MOND<br>O,tr F7I0 | kDLY<br>ANT<br>VLSG<br>GTT<br>MYP<br>GIAD<br>R | 76% | 38.7 | 55.58748 | Ref | 0.024 | -0.42 | -0.15 | -0.4  | -0.39 | -0.15 | -0.2  | 3230 | 2940 | 2340 | 3180 | 2940 | 2580 | 3200 | 3070 | 738.6 | 2950.5 | 4 | 0.0233 | 7.894 |
| Actin, cytoplasmic 2<br>OS=Trichosurus<br>vulpecula<br>GN=ACTG1 PE=1<br>SV=1 | 7 ACTG_T<br>RIVU,sp P<br>63258 AC<br>TG_BOVI<br>N,sp P63<br>259 ACTG<br>_RAT,sp <br>P63260 A<br>CTG_MO<br>USE,sp P6<br>3261 ACT<br>G_HUMA<br>N,tr D2I7<br>P0 D2I7P<br>0_AILME,t<br>r F1PQL8<br> F1PQL8_<br>CANFA,tr <br>F6TII3 F6<br>TII3_MAC<br>MU,tr F7<br>AAK7 F7A<br>AK7_HOR<br>SE,tr F7DI<br>B7 F7DIB<br>7_MOND<br>O,tr F7I0 | kDLY<br>ANT<br>VLSG<br>GTT<br>MYP<br>GIAD<br>R | 95% | 59.4 | 55.57691 | Ref | 0.043 | -1.2  | -0.14 | 0.037 | -0.73 | 0.16  | -0.79 | 2600 | 1890 | 880  | 2020 | 2530 | 1300 | 2520 | 1290 | 984.5 | 2950.5 | 3 | 0.0204 | 6.899 |

|                                                                              |                                                                                                                                                                                                                                                                                                                                   |                                            |     |      |          |     |      |       |       |       |       |       |       |      |      |      |      |      |      |      |      |       |        |   |        |       |
|------------------------------------------------------------------------------|-----------------------------------------------------------------------------------------------------------------------------------------------------------------------------------------------------------------------------------------------------------------------------------------------------------------------------------|--------------------------------------------|-----|------|----------|-----|------|-------|-------|-------|-------|-------|-------|------|------|------|------|------|------|------|------|-------|--------|---|--------|-------|
| Actin, cytoplasmic 2<br>OS=Trichosurus<br>vulpecula<br>GN=ACTG1 PE=1<br>SV=1 | 7 ACTG_T<br>RIVU,sp P<br>63258 AC<br>TG_BOVI<br>N,sp P63<br>259 ACTG<br>_RAT,sp <br>P63260 A<br>CTG_MO<br>USE,sp P6<br>3261 ACT<br>G_HUMA<br>N,tr D2I7<br>P0 D2I7P<br>0_AILME,t<br>r F1PQL8<br> F1PQL8_<br>CANFA,tr <br>F6TII3 F6<br>TII3_MAC<br>MU,tr F7<br>AAK7 F7A<br>AK7_HOR<br>SE,tr F7DI<br>B7 F7DIB<br>7_MOND<br>O,tr F7I0 | kDLY<br>AnTV<br>LSGG<br>TTM<br>YPGI<br>ADR | 95% | 77.3 | 55.48924 | Ref | 0.17 | -0.56 | -0.25 | -0.26 | -0.26 | -0.1  | -0.48 | 2000 | 2020 | 1320 | 1840 | 2020 | 1760 | 2050 | 1570 | 984.9 | 2951.5 | 3 | 0.017  | 5.763 |
| Actin, cytoplasmic 2<br>OS=Trichosurus<br>vulpecula<br>GN=ACTG1 PE=1<br>SV=1 | 7 ACTG_T<br>RIVU,sp P<br>63258 AC<br>TG_BOVI<br>N,sp P63<br>259 ACTG<br>_RAT,sp <br>P63260 A<br>CTG_MO<br>USE,sp P6<br>3261 ACT<br>G_HUMA<br>N,tr D2I7<br>P0 D2I7P<br>0_AILME,t<br>r F1PQL8<br> F1PQL8_<br>CANFA,tr <br>F6TII3 F6<br>TII3_MAC<br>MU,tr F7<br>AAK7 F7A<br>AK7_HOR<br>SE,tr F7DI<br>B7 F7DIB<br>7_MOND<br>O,tr F7I0 | kDLY<br>AnTV<br>LSGG<br>TTM<br>YPGI<br>ADR | 51% | 34.9 | 55.43742 | Ref | 0.19 | -0.75 | -0.07 | -0.26 | -0.22 | -0.14 | -0.31 | 1610 | 1920 | 1090 | 1960 | 1890 | 1700 | 1870 | 1660 | 984.9 | 2951.6 | 3 | 0.0015 | 0.496 |

|                                                                              |                                                                                                                                                                                                                                                                                                                                   |                                  |     |      |          |     |        |       |       |       |       |       |       |       |       |       |       |       |       |       |       |       |        |   |        |       |
|------------------------------------------------------------------------------|-----------------------------------------------------------------------------------------------------------------------------------------------------------------------------------------------------------------------------------------------------------------------------------------------------------------------------------|----------------------------------|-----|------|----------|-----|--------|-------|-------|-------|-------|-------|-------|-------|-------|-------|-------|-------|-------|-------|-------|-------|--------|---|--------|-------|
| Actin, cytoplasmic 2<br>OS=Trichosurus<br>vulpecula<br>GN=ACTG1 PE=1<br>SV=1 | 7 ACTG_T<br>RIVU,sp P<br>63258 AC<br>TG_BOVI<br>N,sp P63<br>259 ACTG<br>_RAT,sp <br>P63260 A<br>CTG_MO<br>USE,sp P6<br>3261 ACT<br>G_HUMA<br>N,tr D2I7<br>P0 D2I7P<br>0_AILME,t<br>r F1PQL8<br> F1PQL8_<br>CANFA,tr <br>F6TII3 F6<br>TII3_MAC<br>MU,tr F7<br>AAK7 F7A<br>AK7_HOR<br>SE,tr F7DI<br>B7 F7DIB<br>7_MOND<br>O,tr F7I0 | qEYD<br>ESGP<br>SIVH<br>R        | 87% | 41.6 | 51.66362 | Ref | -0.005 | -0.21 | -0.26 | -0.31 | -0.27 | -0.17 | -0.36 | 15000 | 13900 | 13100 | 14100 | 15100 | 13500 | 15200 | 13200 | 607.6 | 1819.9 | 3 | 0.0136 | 7.473 |
| Actin, cytoplasmic 2<br>OS=Trichosurus<br>vulpecula<br>GN=ACTG1 PE=1<br>SV=1 | 7 ACTG_T<br>RIVU,sp P<br>63258 AC<br>TG_BOVI<br>N,sp P63<br>259 ACTG<br>_RAT,sp <br>P63260 A<br>CTG_MO<br>USE,sp P6<br>3261 ACT<br>G_HUMA<br>N,tr D2I7<br>P0 D2I7P<br>0_AILME,t<br>r F1PQL8<br> F1PQL8_<br>CANFA,tr <br>F6TII3 F6<br>TII3_MAC<br>MU,tr F7<br>AAK7 F7A<br>AK7_HOR<br>SE,tr F7DI<br>B7 F7DIB<br>7_MOND<br>O,tr F7I0 | sYEL<br>PDG<br>QVIT<br>IGNE<br>R | 84% | 42.1 | 53.97831 | Ref | 0.11   | -0.7  | -0.07 | -0.28 | -0.11 | 0.006 | -0.62 | 8910  | 9520  | 5900  | 10200 | 9740  | 9560  | 10800 | 6990  | 699   | 2094.1 | 3 | 0.0129 | 6.171 |



|                                                                              |                                                                                                                                                                                                                                                                                                                                   |                                  |     |      |          |     |        |       |       |       |       |       |       |      |      |      |      |      |      |      |      |      |        |   |        |       |
|------------------------------------------------------------------------------|-----------------------------------------------------------------------------------------------------------------------------------------------------------------------------------------------------------------------------------------------------------------------------------------------------------------------------------|----------------------------------|-----|------|----------|-----|--------|-------|-------|-------|-------|-------|-------|------|------|------|------|------|------|------|------|------|--------|---|--------|-------|
| Actin, cytoplasmic 2<br>OS=Trichosurus<br>vulpecula<br>GN=ACTG1 PE=1<br>SV=1 | 7 ACTG_T<br>RIVU,sp P<br>63258 AC<br>TG_BOVI<br>N,sp P63<br>259 ACTG<br>_RAT,sp <br>P63260 A<br>CTG_MO<br>USE,sp P6<br>3261 ACT<br>G_HUMA<br>N,tr D2I7<br>P0 D2I7P<br>0_AILME,t<br>r F1PQL8<br> F1PQL8_<br>CANFA,tr <br>F6TII3 F6<br>TII3_MAC<br>MU,tr F7<br>AAK7 F7A<br>AK7_HOR<br>SE,tr F7DI<br>B7 F7DIB<br>7_MOND<br>O,tr F7I0 | SYEL<br>PDG<br>QVIT<br>IGNE<br>R | 93% | 46.3 | 54.06613 | Ref | -0.011 | -0.29 | -0.28 | -0.22 | -0.47 | 0.18  | -0.62 | 3850 | 3540 | 3170 | 3570 | 4110 | 3020 | 4930 | 2820 | 1048 | 2094.1 | 2 | 0.0061 | 2.898 |
| Actin, cytoplasmic 2<br>OS=Trichosurus<br>vulpecula<br>GN=ACTG1 PE=1<br>SV=1 | 7 ACTG_T<br>RIVU,sp P<br>63258 AC<br>TG_BOVI<br>N,sp P63<br>259 ACTG<br>_RAT,sp <br>P63260 A<br>CTG_MO<br>USE,sp P6<br>3261 ACT<br>G_HUMA<br>N,tr D2I7<br>P0 D2I7P<br>0_AILME,t<br>r F1PQL8<br> F1PQL8_<br>CANFA,tr <br>F6TII3 F6<br>TII3_MAC<br>MU,tr F7<br>AAK7 F7A<br>AK7_HOR<br>SE,tr F7DI<br>B7 F7DIB<br>7_MOND<br>O,tr F7I0 | SYEL<br>PDG<br>QVIT<br>IGNE<br>R | 84% | 42.1 | 53.97912 | Ref | 0.031  | -0.28 | -0.6  | -0.26 | -0.3  | 0.013 | -0.05 | 2590 | 2860 | 2500 | 2260 | 3140 | 2660 | 3460 | 3290 | 699  | 2094.1 | 3 | 0.0148 | 7.044 |

|                                                                              |                                                                                                                                                                                                                                                                                                                                   |                                                                |     |      |          |     |       |       |       |       |       |      |       |      |      |      |      |      |      |      |      |       |        |   |        |       |
|------------------------------------------------------------------------------|-----------------------------------------------------------------------------------------------------------------------------------------------------------------------------------------------------------------------------------------------------------------------------------------------------------------------------------|----------------------------------------------------------------|-----|------|----------|-----|-------|-------|-------|-------|-------|------|-------|------|------|------|------|------|------|------|------|-------|--------|---|--------|-------|
| Actin, cytoplasmic 2<br>OS=Trichosurus<br>vulpecula<br>GN=ACTG1 PE=1<br>SV=1 | 7 ACTG_T<br>RIVU,sp P<br>63258 AC<br>TG_BOVI<br>N,sp P63<br>259 ACTG<br>_RAT,sp <br>P63260 A<br>CTG_MO<br>USE,sp P6<br>3261 ACT<br>G_HUMA<br>N,tr D2I7<br>P0 D2I7P<br>0_AILME,t<br>r F1PQL8<br> F1PQL8_<br>CANFA,tr <br>F6TII3 F6<br>TII3_MAC<br>MU,tr F7<br>AAK7 F7A<br>AK7_HOR<br>SE,tr F7DI<br>B7 F7DIB<br>7_MOND<br>O,tr F7I0 | SYEL<br>PDG<br>QVIT<br>IGNE<br>R                               | 95% | 58.7 | 54.02767 | Ref | 0.13  | -0.31 | -0.38 | -0.27 | -0.73 | 0.13 | -0.85 | 1830 | 1460 | 1170 | 1250 | 1480 | 940  | 1790 | 897  | 1048  | 2094.1 | 2 | 0.011  | 5.227 |
| Actin, cytoplasmic 2<br>OS=Trichosurus<br>vulpecula<br>GN=ACTG1 PE=1<br>SV=1 | 7 ACTG_T<br>RIVU,sp P<br>63258 AC<br>TG_BOVI<br>N,sp P63<br>259 ACTG<br>_RAT,sp <br>P63260 A<br>CTG_MO<br>USE,sp P6<br>3261 ACT<br>G_HUMA<br>N,tr D2I7<br>P0 D2I7P<br>0_AILME,t<br>r F1PQL8<br> F1PQL8_<br>CANFA,tr <br>F6TII3 F6<br>TII3_MAC<br>MU,tr F7<br>AAK7 F7A<br>AK7_HOR<br>SE,tr F7DI<br>B7 F7DIB<br>7_MOND<br>O,tr F7I0 | tTGI<br>VMD<br>SGD<br>GVT<br>HTV<br>PIYE<br>GYAL<br>PHAI<br>LR | 95% | 69.4 | 55.9806  | Ref | 0.019 | -0.34 | -0.66 | -0.26 | -0.6  | 0.26 | -0.32 | 2830 | 2490 | 2110 | 1890 | 2750 | 1900 | 3600 | 2390 | 872.7 | 3486.8 | 4 | 0.0328 | 9.416 |

|                                                                              |                                                                                                                                                                                                                                                                                                                                   |                                                                |     |      |          |     |      |       |       |       |       |       |       |      |      |      |      |      |      |      |      |       |        |   |        |       |
|------------------------------------------------------------------------------|-----------------------------------------------------------------------------------------------------------------------------------------------------------------------------------------------------------------------------------------------------------------------------------------------------------------------------------|----------------------------------------------------------------|-----|------|----------|-----|------|-------|-------|-------|-------|-------|-------|------|------|------|------|------|------|------|------|-------|--------|---|--------|-------|
| Actin, cytoplasmic 2<br>OS=Trichosurus<br>vulpecula<br>GN=ACTG1 PE=1<br>SV=1 | 7 ACTG_T<br>RIVU,sp P<br>63258 AC<br>TG_BOVI<br>N,sp P63<br>259 ACTG<br>_RAT,sp <br>P63260 A<br>CTG_MO<br>USE,sp P6<br>3261 ACT<br>G_HUMA<br>N,tr D2I7<br>P0 D2I7P<br>0_AILME,t<br>r F1PQL8<br> F1PQL8_<br>CANFA,tr <br>F6TII3 F6<br>TII3_MAC<br>MU,tr F7<br>AAK7 F7A<br>AK7_HOR<br>SE,tr F7DI<br>B7 F7DIB<br>7_MOND<br>O,tr F7I0 | tTGI<br>VMD<br>SGD<br>GVT<br>HTV<br>PIYE<br>GYAL<br>PHAI<br>LR | 95% | 78.2 | 55.91866 | Ref | 0.03 | -0.27 | -0.11 | -0.73 | -0.62 | 0.46  | -0.59 | 402  | 415  | 366  | 459  | 329  | 310  | 687  | 328  | 872.7 | 3486.8 | 4 | 0.0162 | 4.656 |
| Actin, cytoplasmic 2<br>OS=Trichosurus<br>vulpecula<br>GN=ACTG1 PE=1<br>SV=1 | 7 ACTG_T<br>RIVU,sp P<br>63258 AC<br>TG_BOVI<br>N,sp P63<br>259 ACTG<br>_RAT,sp <br>P63260 A<br>CTG_MO<br>USE,sp P6<br>3261 ACT<br>G_HUMA<br>N,tr D2I7<br>P0 D2I7P<br>0_AILME,t<br>r F1PQL8<br> F1PQL8_<br>CANFA,tr <br>F6TII3 F6<br>TII3_MAC<br>MU,tr F7<br>AAK7 F7A<br>AK7_HOR<br>SE,tr F7DI<br>B7 F7DIB<br>7_MOND<br>O,tr F7I0 | tTGI<br>VMD<br>SGD<br>GVT<br>HTV<br>PIYE<br>GYAL<br>PHAI<br>LR | 63% | 31.9 | 55.7202  | Ref | 0.1  | -0.64 | -0.37 | -0.23 | -0.41 | -0.01 | -0.28 | 2660 | 2440 | 1580 | 2130 | 2600 | 2000 | 2760 | 2270 | 759.2 | 3791   | 5 | 0.02   | 5.266 |

|                                                                              |                                                                                                                                                                                                                                                                                                                                   |                                                                |     |      |          |     |        |       |       |       |       |       |       |     |     |     |     |     |     |     |     |       |      |   |        |       |
|------------------------------------------------------------------------------|-----------------------------------------------------------------------------------------------------------------------------------------------------------------------------------------------------------------------------------------------------------------------------------------------------------------------------------|----------------------------------------------------------------|-----|------|----------|-----|--------|-------|-------|-------|-------|-------|-------|-----|-----|-----|-----|-----|-----|-----|-----|-------|------|---|--------|-------|
| Actin, cytoplasmic 2<br>OS=Trichosurus<br>vulpecula<br>GN=ACTG1 PE=1<br>SV=1 | 7 ACTG_T<br>RIVU,sp P<br>63258 AC<br>TG_BOVI<br>N,sp P63<br>259 ACTG<br>_RAT,sp <br>P63260 A<br>CTG_MO<br>USE,sp P6<br>3261 ACT<br>G_HUMA<br>N,tr D2I7<br>P0 D2I7P<br>0_AILME,t<br>r F1PQL8<br> F1PQL8_<br>CANFA,tr <br>F6TII3 F6<br>TII3_MAC<br>MU,tr F7<br>AAK7 F7A<br>AK7_HOR<br>SE,tr F7DI<br>B7 F7DIB<br>7_MOND<br>O,tr F7I0 | tTGI<br>VMD<br>SGD<br>GVT<br>HTV<br>PlyE<br>GYAL<br>PHAI<br>LR | 84% | 41.3 | 55.50587 | Ref | -0.094 | -0.5  | -0.18 | 0.001 | -0.67 | 3E-04 | -0.53 | 418 | 314 | 257 | 361 | 450 | 246 | 411 | 283 | 948.8 | 3791 | 4 | 0.0079 | 2.089 |
| Actin, cytoplasmic 2<br>OS=Trichosurus<br>vulpecula<br>GN=ACTG1 PE=1<br>SV=1 | 7 ACTG_T<br>RIVU,sp P<br>63258 AC<br>TG_BOVI<br>N,sp P63<br>259 ACTG<br>_RAT,sp <br>P63260 A<br>CTG_MO<br>USE,sp P6<br>3261 ACT<br>G_HUMA<br>N,tr D2I7<br>P0 D2I7P<br>0_AILME,t<br>r F1PQL8<br> F1PQL8_<br>CANFA,tr <br>F6TII3 F6<br>TII3_MAC<br>MU,tr F7<br>AAK7 F7A<br>AK7_HOR<br>SE,tr F7DI<br>B7 F7DIB<br>7_MOND<br>O,tr F7I0 | tTGI<br>VmD<br>SGD<br>GVT<br>HTV<br>PlyE<br>GYAL<br>PHAI<br>LR | 72% | 34.1 | 55.86567 | Ref | -0.19  | -0.32 | 0.049 | -0.39 | -0.39 | -0.27 | -0.24 | 583 | 435 | 430 | 624 | 508 | 444 | 503 | 509 | 762.4 | 3807 | 5 | 0.0218 | 5.723 |

|                                                                              |                                                                                                                                                                                                                                                                                                                                   |                                    |     |      |          |     |       |       |       |       |       |       |       |       |       |       |       |       |       |       |       |       |        |   |        |       |
|------------------------------------------------------------------------------|-----------------------------------------------------------------------------------------------------------------------------------------------------------------------------------------------------------------------------------------------------------------------------------------------------------------------------------|------------------------------------|-----|------|----------|-----|-------|-------|-------|-------|-------|-------|-------|-------|-------|-------|-------|-------|-------|-------|-------|-------|--------|---|--------|-------|
| Actin, cytoplasmic 2<br>OS=Trichosurus<br>vulpecula<br>GN=ACTG1 PE=1<br>SV=1 | 7 ACTG_T<br>RIVU,sp P<br>63258 AC<br>TG_BOVI<br>N,sp P63<br>259 ACTG<br>_RAT,sp <br>P63260 A<br>CTG_MO<br>USE,sp P6<br>3261 ACT<br>G_HUMA<br>N,tr D2I7<br>P0 D2I7P<br>0_AILME,t<br>r F1PQL8<br> F1PQL8_<br>CANFA,tr <br>F6TII3 F6<br>TII3_MAC<br>MU,tr F7<br>AAK7 F7A<br>AK7_HOR<br>SE,tr F7DI<br>B7 F7DIB<br>7_MOND<br>O,tr F7I0 | vAPE<br>EHP<br>VLLT<br>EAPL<br>NPK | 72% | 36.4 | 52.74303 | Ref | -0.19 | -0.27 | -0.27 | -0.26 | -0.3  | 0.005 | -0.64 | 29200 | 20300 | 20800 | 23200 | 25900 | 21900 | 28300 | 18000 | 854.8 | 2561.5 | 3 | 0.005  | 1.946 |
| Actin, cytoplasmic 2<br>OS=Trichosurus<br>vulpecula<br>GN=ACTG1 PE=1<br>SV=1 | 7 ACTG_T<br>RIVU,sp P<br>63258 AC<br>TG_BOVI<br>N,sp P63<br>259 ACTG<br>_RAT,sp <br>P63260 A<br>CTG_MO<br>USE,sp P6<br>3261 ACT<br>G_HUMA<br>N,tr D2I7<br>P0 D2I7P<br>0_AILME,t<br>r F1PQL8<br> F1PQL8_<br>CANFA,tr <br>F6TII3 F6<br>TII3_MAC<br>MU,tr F7<br>AAK7 F7A<br>AK7_HOR<br>SE,tr F7DI<br>B7 F7DIB<br>7_MOND<br>O,tr F7I0 | vAPE<br>EHP<br>VLLT<br>EAPL<br>NPK | 95% | 70.1 | 53.32305 | Ref | -0.22 | -0.18 | -0.23 | -0.16 | -0.26 | 0.008 | -0.49 | 2420  | 2020  | 2260  | 2450  | 2830  | 2310  | 2900  | 2030  | 1282  | 2561.4 | 2 | 0.0197 | 7.704 |

|                                             |                                        |                 |     |      |          |     |       |      |                            |        |                            |       |       |       |        |       |                            |        |                            |       |        |       |        |   |        |       |
|---------------------------------------------|----------------------------------------|-----------------|-----|------|----------|-----|-------|------|----------------------------|--------|----------------------------|-------|-------|-------|--------|-------|----------------------------|--------|----------------------------|-------|--------|-------|--------|---|--------|-------|
| Transgelin OS=Bos taurus GN=TAGLN PE=1 SV=4 | sp Q9TS87 TAGL_BOVIN, tr A8J714_HOR_SE | aAE DYG VTK     | 80% | 38.6 | 52.37591 | Ref | -0.4  | 0.42 | -0.39                      | -0.1   | -0.36                      | 0.013 | -0.77 | 46300 | 34400  | 65500 | 42200                      | 56600  | 41200                      | 55900 | 32200  | 521.3 | 1560.8 | 3 | 0.016  | 10.27 |
| Transgelin OS=Bos taurus GN=TAGLN PE=1 SV=4 | sp Q9TS87 TAGL_BOVIN, tr A8J714_HOR_SE | aAE DYG VTK     | 59% | 33.2 | 52.2839  | Ref | -0.71 | 0.16 | -0.62                      | 0.081  | -0.22                      | 0.43  | -0.9  | 2E+05 | 108000 | 2E+05 | 141000                     | 252000 | 2E+05                      | 3E+05 | 116000 | 521.3 | 1560.8 | 3 | 0.012  | 7.697 |
| Transgelin OS=Bos taurus GN=TAGLN PE=1 SV=4 | sp Q9TS87 TAGL_BOVIN, tr A8J714_HOR_SE | aAE DYG VTK     | 60% | 33.1 | 52.37438 | Ref | -0.68 | 0.33 | -0.45                      | -0.028 | -0.49                      | 0.12  | -0.68 | 21800 | 11300  | 24800 | 16200                      | 23900  | 15100                      | 24100 | 13700  | 781.4 | 1560.8 | 2 | 0.0155 | 9.915 |
| Transgelin OS=Bos taurus GN=TAGLN PE=1 SV=4 | sp Q9TS87 TAGL_BOVIN, tr A8J714_HOR_SE | dLAA VQR        | 73% | 33.8 | 49.79093 | Ref | -0.26 | 0.7  | Value Missing (-1.3385901) | 0.26   | Value Missing (-1.2831969) | -0.11 | -0.58 | 17500 | 12900  | 27100 | Value Missing (-1.3385901) | 24800  | Value Missing (-1.2831969) | 17400 | 12500  | 359.5 | 1075.6 | 3 | 0.0061 | 5.631 |
| Transgelin OS=Bos taurus GN=TAGLN PE=1 SV=4 | sp Q9TS87 TAGL_BOVIN, tr A8J714_HOR_SE | eFTE SQL QEG k  | 95% | 53.3 | 53.38516 | Ref | -0.99 | 0.43 | -0.44                      | 0.058  | -0.61                      | 0.27  | -1.1  | 2E+05 | 79700  | 2E+05 | 142000                     | 221000 | 1E+05                      | 2E+05 | 92700  | 952.5 | 1903   | 2 | 0.0209 | 10.95 |
| Transgelin OS=Bos taurus GN=TAGLN PE=1 SV=4 | sp Q9TS87 TAGL_BOVIN, tr A8J714_HOR_SE | eFTE SQL QEG k  | 94% | 50.4 | 53.4564  | Ref | -0.96 | 0.55 | -0.4                       | -0.033 | -0.57                      | 0.12  | -0.82 | 6E+05 | 283000 | 9E+05 | 510000                     | 724000 | 4E+05                      | 7E+05 | 379000 | 635.3 | 1903   | 3 | 0.0138 | 7.244 |
| Transgelin OS=Bos taurus GN=TAGLN PE=1 SV=4 | sp Q9TS87 TAGL_BOVIN, tr A8J714_HOR_SE | eFTE SQL QEG k  | 95% | 57.8 | 53.45268 | Ref | -0.85 | 0.53 | -0.47                      | 0.055  | -0.73                      | 0.16  | -0.87 | 6960  | 3290   | 9260  | 5200                       | 8260   | 4190                       | 8110  | 3950   | 952.5 | 1903   | 2 | 0.0149 | 7.813 |
| Transgelin OS=Bos taurus GN=TAGLN PE=1 SV=4 | sp Q9TS87 TAGL_BOVIN, tr A8J714_HOR_SE | eFTE SQL QEG k  | 76% | 38.2 | 53.43617 | Ref | -0.87 | 0.31 | -0.6                       | -0.071 | -0.42                      | 0.36  | -0.61 | 25900 | 12700  | 31300 | 18600                      | 29700  | 20300                      | 36400 | 18500  | 635.3 | 1903   | 3 | 0.0125 | 6.566 |
| Transgelin OS=Bos taurus GN=TAGLN PE=1 SV=4 | sp Q9TS87 TAGL_BOVIN, tr A8J714_HOR_SE | gAS QAG MTG YGR | 90% | 40.3 | 49.95065 | Ref | -0.4  | 0.45 | -0.54                      | -0.051 | -0.69                      | -0.06 | -0.85 | 30200 | 17500  | 34000 | 19300                      | 29800  | 16800                      | 27100 | 15500  | 730.4 | 1458.7 | 2 | 0.0118 | 8.099 |

|                                              |                                        |                    |     |      |          |     |       |      |       |        |       |       |       |       |        |       |        |        |       |       |        |       |        |   |        |       |
|----------------------------------------------|----------------------------------------|--------------------|-----|------|----------|-----|-------|------|-------|--------|-------|-------|-------|-------|--------|-------|--------|--------|-------|-------|--------|-------|--------|---|--------|-------|
| Transgeline OS=Bos taurus GN=TAGLN PE=1 SV=4 | sp Q9TS87 TAGL_BOVIN, tr A8J714_HOR SE | gAS QAG MTG YGR    | 94% | 43.6 | 50.06252 | Ref | -0.54 | 0.38 | -0.46 | -0.037 | -0.45 | 0.01  | -0.91 | 15200 | 8340   | 17200 | 10800  | 15900  | 10400 | 15000 | 7840   | 730.4 | 1458.7 | 2 | 0.0111 | 7.592 |
| Transgeline OS=Bos taurus GN=TAGLN PE=1 SV=4 | sp Q9TS87 TAGL_BOVIN, tr A8J714_HOR SE | gAS QAG mTG YGR    | 76% | 33.4 | 49.0894  | Ref | -0.43 | 0.48 | -0.33 | -0.22  | -0.54 | -0.13 | -0.93 | 10600 | 6070   | 12400 | 7880   | 9440   | 6580  | 9130  | 5200   | 738.4 | 1474.7 | 2 | 0.0133 | 8.996 |
| Transgeline OS=Bos taurus GN=TAGLN PE=1 SV=4 | sp Q9TS87 TAGL_BOVIN, tr A8J714_HOR SE | gAS QAG mTG YGR    | 87% | 37.1 | 49.08324 | Ref | -0.76 | 0.48 | -0.59 | 0.013  | -0.66 | 0.092 | -0.98 | 10600 | 4590   | 11700 | 6280   | 10500  | 5770  | 10100 | 4770   | 738.4 | 1474.7 | 2 | 0.0124 | 8.427 |
| Transgeline OS=Bos taurus GN=TAGLN PE=1 SV=4 | sp Q9TS87 TAGL_BOVIN, tr A8J714_HOR SE | gAS QAG MTG YGR    | 52% | 32.4 | 53.04027 | Ref | -0.53 | 0.42 | -0.47 | -0.086 | -0.87 | 0.004 | -1.1  | 12200 | 5490   | 11500 | 6950   | 10000  | 5060  | 9720  | 4620   | 882.5 | 1762.9 | 2 | 0.0118 | 6.704 |
| Transgeline OS=Bos taurus GN=TAGLN PE=1 SV=4 | sp Q9TS87 TAGL_BOVIN, tr A8J714_HOR SE | gAS QAG MTG YGR PR | 60% | 33   | 52.27174 | Ref | -0.65 | 0.39 | -0.48 | 0.058  | -0.49 | 0.22  | -0.79 | 2540  | 1590   | 3550  | 2180   | 3480   | 2080  | 3550  | 1760   | 856.9 | 1711.9 | 2 | 0.0121 | 7.037 |
| Transgeline OS=Bos taurus GN=TAGLN PE=1 SV=4 | sp Q9TS87 TAGL_BOVIN, tr A8J714_HOR SE | gAS QAG MTG YGR PR | 94% | 49.9 | 52.29664 | Ref | -0.64 | 0.44 | -0.54 | 0.31   | -0.91 | 0.15  | -0.89 | 6E+05 | 354000 | 8E+05 | 461000 | 914000 | 3E+05 | 7E+05 | 361000 | 571.6 | 1711.9 | 3 | 0.0115 | 6.69  |
| Transgeline OS=Bos taurus GN=TAGLN PE=1 SV=4 | sp Q9TS87 TAGL_BOVIN, tr A8J714_HOR SE | gAS QAG MTG YGR PR | 91% | 45.2 | 52.27326 | Ref | -1.1  | 0.3  | -0.67 | 0.29   | -0.64 | 0.19  | -0.68 | 6E+05 | 218000 | 6E+05 | 346000 | 746000 | 3E+05 | 6E+05 | 343000 | 571.6 | 1711.9 | 3 | 0.0127 | 7.443 |
| Transgeline OS=Bos taurus GN=TAGLN PE=1 SV=4 | sp Q9TS87 TAGL_BOVIN, tr A8J714_HOR SE | gAS QAG MTG YGR PR | 90% | 44.9 | 52.44631 | Ref | -0.5  | 0.2  | -0.58 | -0.05  | -0.26 | -0.1  | -0.48 | 63500 | 36400  | 64100 | 42000  | 66600  | 50300 | 58500 | 44600  | 571.6 | 1711.9 | 3 | 0.0107 | 6.27  |
| Transgeline OS=Bos taurus GN=TAGLN PE=1 SV=4 | sp Q9TS87 TAGL_BOVIN, tr A8J714_HOR SE | gDP NWF Mk         | 56% | 32.2 | 52.07903 | Ref | -0.97 | 0.35 | -0.42 | 0.18   | -0.68 | 0.12  | -0.69 | 98500 | 41200  | 1E+05 | 73600  | 123000 | 59300 | 1E+05 | 60800  | 801.9 | 1601.8 | 2 | 0.016  | 9.955 |

|                                             |                                       |                |     |      |          |     |       |       |       |        |       |       |       |       |       |       |        |        |       |       |       |       |        |   |        |       |
|---------------------------------------------|---------------------------------------|----------------|-----|------|----------|-----|-------|-------|-------|--------|-------|-------|-------|-------|-------|-------|--------|--------|-------|-------|-------|-------|--------|---|--------|-------|
| Transgelin OS=Bos taurus GN=TAGLN PE=1 SV=4 | sp Q9TS87 TAGL_BOVIN,tr A8J714_HOR SE | hVIG LQM GSN R | 75% | 36.5 | 52.08535 | Ref | -0.4  | 0.14  | -0.17 | -0.31  | -0.52 | 0.14  | -0.55 | 17700 | 11600 | 18200 | 16500  | 16500  | 12400 | 20500 | 12700 | 505.9 | 1514.8 | 3 | 0.0103 | 6.8   |
| Transgelin OS=Bos taurus GN=TAGLN PE=1 SV=4 | sp Q9TS87 TAGL_BOVIN,tr A8J714_HOR SE | hVIG LQM GSN R | 95% | 53.6 | 52.00607 | Ref | -0.28 | 0.17  | -0.26 | -0.021 | -0.61 | -0.04 | -0.68 | 34000 | 23700 | 34900 | 29100  | 37900  | 22100 | 34100 | 21700 | 505.9 | 1514.8 | 3 | 0.012  | 7.948 |
| Transgelin OS=Bos taurus GN=TAGLN PE=1 SV=4 | sp Q9TS87 TAGL_BOVIN,tr A8J714_HOR SE | hVIG LQM GSN R | 93% | 48.2 | 52.07778 | Ref | -0.58 | 0.24  | -0.35 | -0.14  | -0.54 | 0.095 | -0.53 | 62100 | 33900 | 65300 | 48500  | 62000  | 41100 | 66500 | 42700 | 505.9 | 1514.8 | 3 | 0.0109 | 7.216 |
| Transgelin OS=Bos taurus GN=TAGLN PE=1 SV=4 | sp Q9TS87 TAGL_BOVIN,tr A8J714_HOR SE | hVIG LQM GSN R | 90% | 43.9 | 51.98814 | Ref | -0.54 | 0.29  | -0.31 | -0.005 | -0.45 | 0.07  | -0.79 | 1E+05 | 77400 | 1E+05 | 110000 | 150000 | 96300 | 1E+05 | 79100 | 505.9 | 1514.8 | 3 | 0.0088 | 5.83  |
| Transgelin OS=Bos taurus GN=TAGLN PE=1 SV=4 | sp Q9TS87 TAGL_BOVIN,tr A8J714_HOR SE | hVIG LQM GSN R | 82% | 39.2 | 52.16678 | Ref | -0.14 | 0.3   | -0.37 | -0.18  | -0.47 | 0.017 | -0.62 | 58300 | 52900 | 78000 | 54700  | 69000  | 49100 | 72100 | 46000 | 505.9 | 1514.8 | 3 | 0.0079 | 5.237 |
| Transgelin OS=Bos taurus GN=TAGLN PE=1 SV=4 | sp Q9TS87 TAGL_BOVIN,tr A8J714_HOR SE | hVIG LQM GSN R | 91% | 44.8 | 52.01343 | Ref | -0.41 | 0.11  | -0.39 | -0.15  | -0.31 | 0.13  | -0.48 | 7900  | 5460  | 8530  | 6760   | 8820   | 6870  | 9720  | 6320  | 505.9 | 1514.8 | 3 | 0.0093 | 6.127 |
| Transgelin OS=Bos taurus GN=TAGLN PE=1 SV=4 | sp Q9TS87 TAGL_BOVIN,tr A8J714_HOR SE | hVIG LQM GSN R | 92% | 45.9 | 52.11313 | Ref | -0.22 | 0.047 | -0.32 | -0.19  | -0.16 | -0.14 | -0.27 | 1830  | 1590  | 2070  | 1800   | 2170   | 1930  | 2050  | 1870  | 505.9 | 1514.8 | 3 | 0.0073 | 4.801 |
| Transgelin OS=Bos taurus GN=TAGLN PE=1 SV=4 | sp Q9TS87 TAGL_BOVIN,tr A8J714_HOR SE | hVIG LQm GSN R | 95% | 52.7 | 52.14748 | Ref | -0.67 | 0.099 | -0.29 | -0.072 | -0.05 | -0    | -0.59 | 18900 | 10800 | 19900 | 17100  | 21900  | 19400 | 21000 | 13800 | 511.3 | 1530.8 | 3 | 0.0116 | 7.599 |
| Transgelin OS=Bos taurus GN=TAGLN PE=1 SV=4 | sp Q9TS87 TAGL_BOVIN,tr A8J714_HOR SE | hVIG LQm GSN R | 86% | 41.3 | 52.16902 | Ref | -0.39 | -0.08 | -0.34 | -0.21  | -0.08 | -0.05 | -0.26 | 44200 | 31500 | 42300 | 39700  | 47700  | 45700 | 48700 | 41700 | 511.3 | 1530.8 | 3 | 0.01   | 6.522 |



|                                             |                                       |                                 |     |      |          |     |        |       |       |        |       |       |       |       |       |       |       |       |       |       |       |       |        |   |        |       |
|---------------------------------------------|---------------------------------------|---------------------------------|-----|------|----------|-----|--------|-------|-------|--------|-------|-------|-------|-------|-------|-------|-------|-------|-------|-------|-------|-------|--------|---|--------|-------|
| Transgelin OS=Bos taurus GN=TAGLN PE=1 SV=4 | sp Q9TS87 TAGL_BOVIN,tr A8J714_HOR SE | hVIG LQM GSnr                   | 95% | 51.1 | 52.03169 | Ref | -0.035 | 0.021 | -0.06 | -0.098 | -0.45 | -0.26 | -0.34 | 24800 | 25900 | 29200 | 31000 | 33300 | 22700 | 27100 | 25500 | 506.3 | 1515.8 | 3 | 0.0076 | 5.041 |
| Transgelin OS=Bos taurus GN=TAGLN PE=1 SV=4 | sp Q9TS87 TAGL_BOVIN,tr A8J714_HOR SE | hVIG LQM GSnr                   | 95% | 61.2 | 51.96008 | Ref | -0.67  | 0.29  | -0.46 | -0.031 | -0.48 | 0.08  | -0.39 | 29700 | 17000 | 35900 | 23900 | 35500 | 22800 | 35000 | 25000 | 506.3 | 1515.8 | 3 | 0.0119 | 7.869 |
| Transgelin OS=Bos taurus GN=TAGLN PE=1 SV=4 | sp Q9TS87 TAGL_BOVIN,tr A8J714_HOR SE | hVIG LQM GSnr                   | 95% | 56.1 | 51.9144  | Ref | -0.31  | 0.077 | -0.13 | -0.15  | -0.41 | 0.16  | -0.53 | 13500 | 11600 | 16400 | 16000 | 17300 | 12600 | 19500 | 12000 | 506.3 | 1515.8 | 3 | 0.0111 | 7.335 |
| Transgelin OS=Bos taurus GN=TAGLN PE=1 SV=4 | sp Q9TS87 TAGL_BOVIN,tr A8J714_HOR SE | IGFQ VWLk                       | 84% | 36.5 | 49.76208 | Ref | -0.83  | 0.2   | -0.57 | 0.013  | -0.62 | 0.33  | -1.1  | 10800 | 4160  | 9180  | 6040  | 10000 | 5640  | 11400 | 4310  | 800   | 1598   | 2 | 0.0101 | 6.326 |
| Transgelin OS=Bos taurus GN=TAGLN PE=1 SV=4 | sp Q9TS87 TAGL_BOVIN,tr A8J714_HOR SE | IGFQ VWLk                       | 71% | 32.9 | 49.99926 | Ref | -0.97  | 0.29  | -0.6  | 0.047  | -0.7  | 0.34  | -1    | 1260  | 445   | 1160  | 702   | 1210  | 632   | 1350  | 525   | 800   | 1598   | 2 | 0.0121 | 7.539 |
| Transgelin OS=Bos taurus GN=TAGLN PE=1 SV=4 | sp Q9TS87 TAGL_BOVIN,tr A8J714_HOR SE | IVNS LYPD GSKP VkvP ENPP SMV Fk | 92% | 43   | 51.41798 | Ref | -0.69  | 0.3   | -0.24 | -0.015 | -0.69 | 0.26  | -0.96 | 973   | 510   | 1100  | 843   | 1090  | 594   | 1210  | 512   | 990.6 | 3958.2 | 4 | 0.0289 | 7.304 |
| Transgelin OS=Bos taurus GN=TAGLN PE=1 SV=4 | sp Q9TS87 TAGL_BOVIN,tr A8J714_HOR SE | IVnS LYPD GSKP VkvP ENPP SMV Fk | 61% | 31.6 | 52.17039 | Ref | -1.2   | 0.18  | -0.47 | 0.12   | -0.02 | 0.22  | -1.3  | 1950  | 634   | 1830  | 1310  | 2170  | 1720  | 2130  | 722   | 990.8 | 3959.2 | 4 | 0.0309 | 7.799 |
| Transgelin OS=Bos taurus GN=TAGLN PE=1 SV=4 | sp Q9TS87 TAGL_BOVIN,tr A8J714_HOR SE | qME QVA QFLk                    | 91% | 42.9 | 52.37551 | Ref | -0.6   | 0.29  | -0.39 | -0.023 | -0.62 | 0.078 | -0.75 | 727   | 371   | 748   | 522   | 744   | 431   | 728   | 407   | 754.9 | 1507.8 | 2 | 0.0101 | 6.702 |

|                                             |                                       |              |     |      |          |     |        |       |       |        |       |       |       |       |       |       |       |       |       |       |       |       |        |   |        |       |
|---------------------------------------------|---------------------------------------|--------------|-----|------|----------|-----|--------|-------|-------|--------|-------|-------|-------|-------|-------|-------|-------|-------|-------|-------|-------|-------|--------|---|--------|-------|
| Transgelin OS=Bos taurus GN=TAGLN PE=1 SV=4 | sp Q9TS87 TAGL_BOVIN,tr A8J714_HOR SE | qmE QVA QFLK | 86% | 40.2 | 52.3125  | Ref | -0.37  | 0.12  | -0.52 | -0.17  | -0.56 | 0.011 | -0.66 | 4390  | 2300  | 3510  | 2520  | 3550  | 2350  | 3660  | 2280  | 754.9 | 1507.8 | 2 | 0.0161 | 10.67 |
| Transgelin OS=Bos taurus GN=TAGLN PE=1 SV=4 | sp Q9TS87 TAGL_BOVIN,tr A8J714_HOR SE | qmE QVA QFLK | 88% | 42   | 53.35374 | Ref | -0.76  | 0.22  | -0.35 | 0.008  | -0.57 | 0.14  | -0.55 | 10500 | 5130  | 10900 | 8270  | 11700 | 6850  | 11700 | 7190  | 915.5 | 1829   | 2 | 0.0151 | 8.254 |
| Transgelin OS=Bos taurus GN=TAGLN PE=1 SV=4 | sp Q9TS87 TAGL_BOVIN,tr A8J714_HOR SE | qmE QVA QFLK | 89% | 42.4 | 53.25341 | Ref | -0.53  | 0.32  | -0.53 | 0.092  | -0.64 | 0.12  | -0.81 | 12900 | 7400  | 14400 | 9010  | 15300 | 8010  | 14200 | 7400  | 915.5 | 1829   | 2 | 0.0094 | 5.117 |
| Transgelin OS=Bos taurus GN=TAGLN PE=1 SV=4 | sp Q9TS87 TAGL_BOVIN,tr A8J714_HOR SE | qmE QVA QFLK | 90% | 43.6 | 53.31974 | Ref | -0.6   | 0.32  | -0.51 | 0.025  | -0.63 | 0.25  | -0.84 | 6960  | 3890  | 8030  | 5070  | 8070  | 4490  | 8610  | 4010  | 915.5 | 1829   | 2 | 0.0145 | 7.926 |
| Transgelin OS=Bos taurus GN=TAGLN PE=1 SV=4 | sp Q9TS87 TAGL_BOVIN,tr A8J714_HOR SE | qmE QVA QFLK | 85% | 39   | 51.61784 | Ref | -0.36  | 0.1   | -0.61 | -0.13  | -0.27 | -0.17 | -0.12 | 370   | 254   | 380   | 261   | 399   | 318   | 355   | 365   | 762.9 | 1523.8 | 2 | 0.015  | 9.829 |
| Transgelin OS=Bos taurus GN=TAGLN PE=1 SV=4 | sp Q9TS87 TAGL_BOVIN,tr A8J714_HOR SE | qmE QVA QFLK | 94% | 44.8 | 51.57976 | Ref | -0.75  | 0.35  | -0.42 | -0.098 | -0.34 | 0.16  | -0.54 | 1020  | 583   | 1360  | 890   | 1230  | 904   | 1340  | 820   | 762.9 | 1523.8 | 2 | 0.016  | 10.47 |
| Transgelin OS=Bos taurus GN=TAGLN PE=1 SV=4 | sp Q9TS87 TAGL_BOVIN,tr A8J714_HOR SE | qmE QVA QFLK | 95% | 48.4 | 51.64097 | Ref | -0.085 | -0.06 | -0.82 | -0.18  | -0.82 | -0.21 | -0.27 | 750   | 427   | 473   | 311   | 538   | 302   | 479   | 455   | 762.9 | 1523.8 | 2 | 0.0134 | 8.792 |
| Transgelin OS=Bos taurus GN=TAGLN PE=1 SV=4 | sp Q9TS87 TAGL_BOVIN,tr A8J714_HOR SE | qmE QVA QFLK | 52% | 32.8 | 53.41272 | Ref | -0.57  | 0.41  | -0.39 | -0.045 | -0.56 | 0.089 | -0.72 | 8020  | 4840  | 10400 | 6690  | 9370  | 5740  | 9380  | 5330  | 923.5 | 1845   | 2 | 0.0198 | 10.7  |
| Transgelin OS=Bos taurus GN=TAGLN PE=1 SV=4 | sp Q9TS87 TAGL_BOVIN,tr A8J714_HOR SE | qmE QVA QFLK | 71% | 37   | 53.45197 | Ref | -0.55  | -0.11 | -0.39 | 0.083  | -0.55 | 0.065 | 0.064 | 37900 | 26700 | 39300 | 36200 | 55400 | 31100 | 49900 | 49500 | 616   | 1845   | 3 | 0.0256 | 13.88 |

|                                             |                                       |                           |     |      |          |     |       |       |       |        |       |       |       |       |       |       |       |       |       |       |       |       |        |   |        |       |
|---------------------------------------------|---------------------------------------|---------------------------|-----|------|----------|-----|-------|-------|-------|--------|-------|-------|-------|-------|-------|-------|-------|-------|-------|-------|-------|-------|--------|---|--------|-------|
| Transgelin OS=Bos taurus GN=TAGLN PE=1 SV=4 | sp Q9TS87 TAGL_BOVIN,tr A8J714_HOR_SE | tDM<br>FQT<br>VDLF<br>EGk | 93% | 49.4 | 54.01931 | Ref | -0.69 | 0.44  | -0.66 | -0.18  | -0.41 | 0.27  | -0.83 | 62200 | 32000 | 76000 | 39900 | 61200 | 45700 | 76400 | 35400 | 713.7 | 2138.1 | 3 | 0.0171 | 8.015 |
| Transgelin OS=Bos taurus GN=TAGLN PE=1 SV=4 | sp Q9TS87 TAGL_BOVIN,tr A8J714_HOR_SE | tDM<br>FQT<br>VDLF<br>EGk | 94% | 48   | 54.01821 | Ref | -0.85 | 0.35  | -0.34 | 0.15   | -0.71 | 0.21  | -0.96 | 2860  | 1330  | 3320  | 2300  | 3570  | 1720  | 3390  | 1500  | 1070  | 2138.1 | 2 | 0.0146 | 6.838 |
| Transgelin OS=Bos taurus GN=TAGLN PE=1 SV=4 | sp Q9TS87 TAGL_BOVIN,tr A8J714_HOR_SE | tDM<br>FQT<br>VDLF<br>EGk | 91% | 47.5 | 54.03055 | Ref | -0.53 | 0.16  | -0.48 | -0.17  | -0.52 | 0.26  | -0.35 | 7130  | 4470  | 7840  | 5640  | 7690  | 5270  | 9450  | 6140  | 713.7 | 2138.1 | 3 | 0.0144 | 6.724 |
| Transgelin OS=Bos taurus GN=TAGLN PE=1 SV=4 | sp Q9TS87 TAGL_BOVIN,tr A8J714_HOR_SE | tDM<br>FQT<br>VDLF<br>EGk | 95% | 54.6 | 54.0321  | Ref | -0.38 | 0.17  | -0.43 | -0.085 | -0.53 | 0.017 | -0.36 | 1790  | 1200  | 1910  | 1420  | 1980  | 1270  | 1940  | 1480  | 713.7 | 2138.1 | 3 | 0.0124 | 5.785 |
| Transgelin OS=Bos taurus GN=TAGLN PE=1 SV=4 | sp Q9TS87 TAGL_BOVIN,tr A8J714_HOR_SE | tDM<br>FQT<br>VDLF<br>EGk | 95% | 54.4 | 54.09483 | Ref | -0.48 | 0.14  | -0.37 | -0.19  | -0.33 | 0.044 | -0.27 | 1720  | 1150  | 1920  | 1520  | 1890  | 1500  | 2030  | 1620  | 713.7 | 2138.1 | 3 | 0.0063 | 2.966 |
| Transgelin OS=Bos taurus GN=TAGLN PE=1 SV=4 | sp Q9TS87 TAGL_BOVIN,tr A8J714_HOR_SE | tDM<br>FQT<br>VDLF<br>EGk | 93% | 50.2 | 54.09483 | Ref | -0.41 | -0.05 | -0.37 | -0.12  | -0.28 | 0.089 | -0.41 | 927   | 609   | 845   | 759   | 998   | 780   | 1050  | 738   | 713.7 | 2138.1 | 3 | 0.0063 | 2.966 |
| Transgelin OS=Bos taurus GN=TAGLN PE=1 SV=4 | sp Q9TS87 TAGL_BOVIN,tr A8J714_HOR_SE | tDM<br>FQT<br>VDLF<br>EGk | 75% | 38.4 | 53.77208 | Ref | -0.47 | 0.097 | -0.26 | -0.26  | -0.42 | 0.31  | -0.75 | 17500 | 10900 | 17500 | 15400 | 16900 | 13200 | 22800 | 10900 | 719   | 2154.1 | 3 | 0.0205 | 9.506 |
| Transgelin OS=Bos taurus GN=TAGLN PE=1 SV=4 | sp Q9TS87 TAGL_BOVIN,tr A8J714_HOR_SE | TLM<br>ALGS<br>LAVT<br>k  | 95% | 50.2 | 50.93975 | Ref | -0.48 | 0.46  | -0.56 | -0.012 | -0.31 | -0.03 | -0.62 | 3660  | 2680  | 5590  | 3080  | 4980  | 3530  | 4500  | 2970  | 503.6 | 1507.9 | 3 | 0.0121 | 8.02  |
| Transgelin OS=Bos taurus GN=TAGLN PE=1 SV=4 | sp Q9TS87 TAGL_BOVIN,tr A8J714_HOR_SE | TLM<br>ALGS<br>LAVT<br>k  | 95% | 66   | 50.37438 | Ref | -0.53 | 0.21  | -0.36 | -0.087 | -0.66 | 0.27  | -0.86 | 57000 | 31700 | 57200 | 43300 | 57600 | 33900 | 67400 | 30400 | 605   | 1812.1 | 3 | 0.0152 | 8.402 |

|                                             |                                      |             |     |      |          |     |       |      |       |        |       |       |       |       |       |       |       |       |       |       |       |       |        |   |        |       |
|---------------------------------------------|--------------------------------------|-------------|-----|------|----------|-----|-------|------|-------|--------|-------|-------|-------|-------|-------|-------|-------|-------|-------|-------|-------|-------|--------|---|--------|-------|
| Transgelin OS=Bos taurus GN=TAGLN PE=1 SV=4 | sp Q9TS87 TAGL_BOVIN,tr A8J714_HORSE | tLMALGSLAVT | 95% | 60.5 | 50.37912 | Ref | -0.57 | 0.26 | -0.56 | 0.014  | -0.5  | 0.25  | -0.7  | 18000 | 10800 | 20700 | 13200 | 21700 | 13300 | 23400 | 11900 | 605   | 1812.1 | 3 | 0.0151 | 8.303 |
| Transgelin OS=Bos taurus GN=TAGLN PE=1 SV=4 | sp Q9TS87 TAGL_BOVIN,tr A8J714_HORSE | tLMALGSLAVT | 95% | 68.5 | 49.79885 | Ref | -0.41 | 0.14 | -0.33 | -0.065 | -0.53 | 0.058 | -0.54 | 21200 | 13500 | 21400 | 17400 | 23100 | 14600 | 22900 | 15100 | 907.1 | 1812.1 | 2 | 0.0059 | 3.28  |
| Transgelin OS=Bos taurus GN=TAGLN PE=1 SV=4 | sp Q9TS87 TAGL_BOVIN,tr A8J714_HORSE | tLMALGSLAVT | 95% | 62.1 | 50.58027 | Ref | -0.66 | 0.17 | -0.38 | -0.02  | -0.66 | 0.29  | -0.73 | 10400 | 5360  | 10300 | 7920  | 11200 | 6280  | 12700 | 6180  | 907   | 1812.1 | 2 | 0.0173 | 9.546 |
| Transgelin OS=Bos taurus GN=TAGLN PE=1 SV=4 | sp Q9TS87 TAGL_BOVIN,tr A8J714_HORSE | tLMALGSLAVT | 95% | 65.7 | 49.70021 | Ref | -0.4  | 0.21 | -0.42 | -0.035 | -0.48 | 0.061 | -0.6  | 5860  | 3910  | 6450  | 4680  | 6740  | 4320  | 6570  | 4130  | 605   | 1812.1 | 3 | 0.0046 | 2.545 |
| Transgelin OS=Bos taurus GN=TAGLN PE=1 SV=4 | sp Q9TS87 TAGL_BOVIN,tr A8J714_HORSE | tLMALGSLAVT | 95% | 68.2 | 50.16745 | Ref | -0.53 | 0.25 | -0.34 | -0.11  | -0.35 | -0.07 | -0.49 | 5230  | 3160  | 5870  | 4380  | 5660  | 4180  | 5290  | 3940  | 605   | 1812.1 | 3 | 0.0132 | 7.293 |
| Transgelin OS=Bos taurus GN=TAGLN PE=1 SV=4 | sp Q9TS87 TAGL_BOVIN,tr A8J714_HORSE | tLMALGSLAVT | 95% | 52.2 | 49.98761 | Ref | -0.3  | 0.28 | -0.5  | -0.21  | -0.58 | 0.12  | -0.34 | 4790  | 3700  | 6000  | 3920  | 5300  | 3580  | 6050  | 4390  | 605   | 1812.1 | 3 | 0.0097 | 5.374 |
| Transgelin OS=Bos taurus GN=TAGLN PE=1 SV=4 | sp Q9TS87 TAGL_BOVIN,tr A8J714_HORSE | tLMALGSLAVT | 95% | 71.3 | 49.9829  | Ref | -0.54 | 0.31 | -0.17 | -0.093 | -0.46 | -0.08 | -0.46 | 907   | 603   | 1180  | 949   | 1100  | 744   | 1010  | 774   | 605   | 1812.1 | 3 | 0.0092 | 5.076 |
| Transgelin OS=Bos taurus GN=TAGLN PE=1 SV=4 | sp Q9TS87 TAGL_BOVIN,tr A8J714_HORSE | tLMALGSLAVT | 95% | 62.3 | 49.83396 | Ref | -0.32 | -0   | -0.41 | -0.12  | -0.5  | 0.31  | -0.5  | 800   | 598   | 809   | 686   | 925   | 618   | 1130  | 640   | 605   | 1812.1 | 3 | 0.0068 | 3.769 |
| Transgelin OS=Bos taurus GN=TAGLN PE=1 SV=4 | sp Q9TS87 TAGL_BOVIN,tr A8J714_HORSE | tLMALGSLAVT | 72% | 34.1 | 50.45839 | Ref | -0.22 | -0.1 | -0.27 | -0.079 | -0.33 | -0.05 | -0.35 | 3520  | 2830  | 3330  | 3320  | 4170  | 3070  | 3890  | 3120  | 610.4 | 1828.1 | 3 | 0.0038 | 2.078 |

|                                             |                                       |              |     |      |          |     |       |       |       |        |       |       |       |       |       |       |       |       |       |       |       |       |        |   |        |       |
|---------------------------------------------|---------------------------------------|--------------|-----|------|----------|-----|-------|-------|-------|--------|-------|-------|-------|-------|-------|-------|-------|-------|-------|-------|-------|-------|--------|---|--------|-------|
| Transgelin OS=Bos taurus GN=TAGLN PE=1 SV=4 | sp Q9TS87 TAGL_BOVIN,tr A8J714_HOR SE | tLmALGSLAVTK | 87% | 41.2 | 51.6348  | Ref | -0.16 | -0    | -0.26 | -0.18  | -0.41 | -0.06 | -0.37 | 3560  | 2930  | 3540  | 3330  | 3880  | 2880  | 3850  | 3070  | 610.4 | 1828.1 | 3 | 0.0237 | 12.95 |
| Transgelin OS=Bos taurus GN=TAGLN PE=1 SV=4 | sp Q9TS87 TAGL_BOVIN,tr A8J714_HOR SE | tLmALGSLAVTK | 95% | 63.3 | 51.17457 | Ref | -0.65 | 0.22  | -0.53 | -0.091 | -0.55 | 0.085 | -0.53 | 8020  | 3740  | 7420  | 4960  | 7410  | 4720  | 7640  | 4950  | 610.4 | 1828.1 | 3 | 0.0143 | 7.828 |
| Transgelin OS=Bos taurus GN=TAGLN PE=1 SV=4 | sp Q9TS87 TAGL_BOVIN,tr A8J714_HOR SE | tLmALGSLAVTK | 76% | 36.3 | 51.44521 | Ref | -0.2  | -0.22 | -0.23 | -0.13  | -0.23 | -0.1  | -0.11 | 1030  | 919   | 982   | 1090  | 1300  | 1060  | 1200  | 1190  | 610.4 | 1828.1 | 3 | 0.0185 | 10.14 |
| Transgelin OS=Bos taurus GN=TAGLN PE=1 SV=4 | sp Q9TS87 TAGL_BOVIN,tr A8J714_HOR SE | tLmALGSLAVTK | 76% | 37.6 | 54.676   | Ref | -0.52 | 0.18  | -0.43 | 0.077  | -0.77 | 0.3   | -0.7  | 5440  | 3340  | 5910  | 4340  | 6790  | 3310  | 7230  | 3600  | 639.9 | 2555.4 | 4 | 0.016  | 6.253 |
| Transgelin OS=Bos taurus GN=TAGLN PE=1 SV=4 | sp Q9TS87 TAGL_BOVIN,tr A8J714_HOR SE | tLmALGSLAVTK | 89% | 45.7 | 54.69888 | Ref | -0.6  | -0.02 | -0.28 | 0.13   | -0.47 | 0.13  | -0.33 | 930   | 606   | 979   | 918   | 1350  | 773   | 1230  | 886   | 852.8 | 2555.4 | 3 | 0.0151 | 5.895 |
| Transgelin OS=Bos taurus GN=TAGLN PE=1 SV=4 | sp Q9TS87 TAGL_BOVIN,tr A8J714_HOR SE | tLmALGSLAVTK | 61% | 33.5 | 54.03729 | Ref | -0.41 | -0.16 | -0.12 | -0.04  | -0.26 | -0.05 | -0.32 | 6610  | 4750  | 6100  | 7050  | 8220  | 6160  | 7450  | 6110  | 715.9 | 2859.6 | 4 | 0.0184 | 6.442 |
| Transgelin OS=Bos taurus GN=TAGLN PE=1 SV=4 | sp Q9TS87 TAGL_BOVIN,tr A8J714_HOR SE | vPENPPSMVFk  | 75% | 38.1 | 53.42875 | Ref | -0.49 | 0.45  | -0.56 | -0.3   | -0.67 | 0.046 | -0.96 | 68100 | 32300 | 67000 | 37400 | 49300 | 33400 | 57200 | 28200 | 618.3 | 1852   | 3 | 0.0228 | 12.32 |
| Transgelin OS=Bos taurus GN=TAGLN PE=1 SV=4 | sp Q9TS87 TAGL_BOVIN,tr A8J714_HOR SE | vPENPPSMVFk  | 95% | 63.1 | 53.32596 | Ref | -0.39 | 0.43  | -0.52 | -0.16  | -0.61 | -0.11 | -0.89 | 13400 | 7240  | 13900 | 8080  | 11400 | 7280  | 10800 | 6210  | 927   | 1852   | 2 | 0.0175 | 9.469 |
| Transgelin OS=Bos taurus GN=TAGLN PE=1 SV=4 | sp Q9TS87 TAGL_BOVIN,tr A8J714_HOR SE | vPENPPSMVFk  | 59% | 34.2 | 53.30773 | Ref | -0.68 | 0.46  | -0.63 | -0.18  | -0.74 | -0.01 | -1.2  | 68800 | 25100 | 59900 | 31700 | 47800 | 28200 | 49100 | 21700 | 618.3 | 1852   | 3 | 0.0159 | 8.56  |

|                                                                 |                                                |               |     |      |          |     |       |       |       |        |       |       |       |       |       |       |       |       |       |       |       |       |        |   |        |       |
|-----------------------------------------------------------------|------------------------------------------------|---------------|-----|------|----------|-----|-------|-------|-------|--------|-------|-------|-------|-------|-------|-------|-------|-------|-------|-------|-------|-------|--------|---|--------|-------|
| Transgelin OS=Bos taurus GN=TAGLN PE=1 SV=4                     | sp Q9TS87 TAGL_BOVIN, tr A8J714_HOR_714_HOR_SE | vPEN PPS MVFk | 95% | 55.4 | 53.28506 | Ref | -0.78 | 0.35  | -0.57 | -0.057 | -0.48 | -0.03 | -0.95 | 22700 | 8520  | 20200 | 12000 | 18900 | 12300 | 17600 | 9180  | 927   | 1852   | 2 | 0.0132 | 7.105 |
| Transgelin OS=Bos taurus GN=TAGLN PE=1 SV=4                     | sp Q9TS87 TAGL_BOVIN, tr A8J714_HOR_714_HOR_SE | yDEE LEER     | 56% | 28.2 | 48.10206 | Ref | -0.57 | 0.39  | -0.26 | -0.057 | -0.48 | 0.029 | -0.83 | 78000 | 46900 | 98800 | 70700 | 89900 | 58600 | 87000 | 47700 | 693.8 | 1385.6 | 2 | 0.0123 | 8.875 |
| Uncharacterized protein OS=Callithrix jacchus GN=MYH9 PE=4 SV=1 | tr F6YYM7 F6YYM7_CALJA, tr F6ZZ90 F6ZZ90_CALJA | aDG AEAK      | 80% | 37.1 | 50.9899  | Ref | -0.47 | 0.016 | -0.66 | -0.25  | -0.21 | -0.28 | -0.24 | 17000 | 9690  | 14700 | 10400 | 15200 | 13700 | 13600 | 13800 | 423.9 | 1268.7 | 3 | 0.0028 | 2.219 |
| Uncharacterized protein OS=Callithrix jacchus GN=MYH9 PE=4 SV=1 | tr F6YYM7 F6YYM7_CALJA, tr F6ZZ90 F6ZZ90_CALJA | aLEE AME Qk   | 63% | 35.1 | 53.36289 | Ref | -0.5  | 0.39  | -0.57 | -0.34  | -0.63 | -0.18 | -0.36 | 36300 | 21100 | 42300 | 24600 | 31700 | 22600 | 32200 | 28300 | 553   | 1655.9 | 3 | 0.0216 | 13.04 |
| Uncharacterized protein OS=Callithrix jacchus GN=MYH9 PE=4 SV=1 | tr F6YYM7 F6YYM7_CALJA, tr F6ZZ90 F6ZZ90_CALJA | aLEE AME Qk   | 95% | 53.9 | 53.43412 | Ref | -0.41 | 0.21  | -0.82 | -0.26  | -0.49 | 0.066 | -0.51 | 15000 | 9090  | 15100 | 8300  | 13500 | 10100 | 15500 | 10300 | 828.9 | 1655.9 | 2 | 0.019  | 11.47 |
| Uncharacterized protein OS=Callithrix jacchus GN=MYH9 PE=4 SV=1 | tr F6YYM7 F6YYM7_CALJA, tr F6ZZ90 F6ZZ90_CALJA | aLEE AME Qk   | 95% | 50.9 | 53.37932 | Ref | -0.52 | 0.36  | -0.72 | -0.21  | -0.63 | -0.05 | -0.51 | 19900 | 11200 | 22400 | 11900 | 18700 | 12200 | 19100 | 13700 | 829   | 1655.9 | 2 | 0.0134 | 8.094 |

|                                                                       |                                                |                                  |     |      |          |     |       |       |       |       |       |       |       |       |       |       |       |       |       |       |       |       |        |   |        |       |
|-----------------------------------------------------------------------|------------------------------------------------|----------------------------------|-----|------|----------|-----|-------|-------|-------|-------|-------|-------|-------|-------|-------|-------|-------|-------|-------|-------|-------|-------|--------|---|--------|-------|
| Uncharacterized protein<br>OS=Callithrix jacchus GN=MYH9<br>PE=4 SV=1 | tr F6YYM7 F6YYM7_CALJA, tr F6ZZ90 F6ZZ90_CALJA | aLEE<br>AME<br>Qk                | 86% | 42.7 | 53.43792 | Ref | -0.52 | 0.27  | -0.68 | -0.24 | -0.62 | 0.065 | -0.53 | 84900 | 48100 | 90000 | 52300 | 78200 | 52400 | 88000 | 57800 | 553   | 1655.9 | 3 | 0.0126 | 7.627 |
| Uncharacterized protein<br>OS=Callithrix jacchus GN=MYH9<br>PE=4 SV=1 | tr F6YYM7 F6YYM7_CALJA, tr F6ZZ90 F6ZZ90_CALJA | aLEQ<br>QVE<br>EMk               | 95% | 60.9 | 53.88856 | Ref | -0.51 | 0.36  | -0.68 | -0.24 | -0.64 | 0.002 | -0.59 | 11700 | 6630  | 13200 | 7160  | 10700 | 7090  | 11600 | 7600  | 907   | 1812   | 2 | 0.0177 | 9.75  |
| Uncharacterized protein<br>OS=Callithrix jacchus GN=MYH9<br>PE=4 SV=1 | tr F6YYM7 F6YYM7_CALJA, tr F6ZZ90 F6ZZ90_CALJA | aLEQ<br>QVE<br>EMk               | 90% | 46.4 | 53.91803 | Ref | -0.65 | 0.38  | -0.88 | -0.22 | -0.78 | -0.06 | -0.48 | 54600 | 24400 | 53800 | 25400 | 44000 | 26100 | 44900 | 33300 | 605   | 1812   | 3 | 0.0165 | 9.119 |
| Uncharacterized protein<br>OS=Callithrix jacchus GN=MYH9<br>PE=4 SV=1 | tr F6YYM7 F6YYM7_CALJA, tr F6ZZ90 F6ZZ90_CALJA | aLEQ<br>QVE<br>EMk               | 90% | 46.4 | 53.91803 | Ref | -0.51 | 0.38  | -0.6  | -0.08 | -0.73 | -0.19 | -0.34 | 42400 | 26700 | 53900 | 30700 | 48500 | 27000 | 41000 | 36600 | 605   | 1812   | 3 | 0.0165 | 9.119 |
| Uncharacterized protein<br>OS=Callithrix jacchus GN=MYH9<br>PE=4 SV=1 | tr F6YYM7 F6YYM7_CALJA, tr F6ZZ90 F6ZZ90_CALJA | aLEQ<br>QVE<br>EMk               | 68% | 36.7 | 53.98018 | Ref | -0.22 | 0.14  | -0.73 | -0.16 | -0.41 | -0.13 | -0.65 | 15200 | 10400 | 14500 | 8910  | 14500 | 10700 | 13500 | 9370  | 605   | 1812   | 3 | 0.0154 | 8.507 |
| Uncharacterized protein<br>OS=Callithrix jacchus GN=MYH9<br>PE=4 SV=1 | tr F6YYM7 F6YYM7_CALJA, tr F6ZZ90 F6ZZ90_CALJA | aNL<br>QID<br>QINT<br>DLNL<br>ER | 95% | 58.4 | 54.3738  | Ref | -0.29 | -0.21 | -0.13 | -0.23 | -0.4  | -0.09 | -0.26 | 9820  | 8070  | 9270  | 11000 | 11300 | 8770  | 11400 | 10000 | 725.4 | 2173.2 | 3 | 0.0111 | 5.126 |

|                                                                       |                                                |                                  |     |      |          |     |                            |       |       |        |       |       |       |      |                            |      |      |      |      |      |      |       |        |   |        |       |
|-----------------------------------------------------------------------|------------------------------------------------|----------------------------------|-----|------|----------|-----|----------------------------|-------|-------|--------|-------|-------|-------|------|----------------------------|------|------|------|------|------|------|-------|--------|---|--------|-------|
| Uncharacterized protein<br>OS=Callithrix jacchus GN=MYH9<br>PE=4 SV=1 | tr F6YYM7 F6YYM7_CALJA, tr F6ZZ90 F6ZZ90_CALJA | aNL<br>QID<br>QINT<br>DLNL<br>ER | 82% | 40.3 | 54.40805 | Ref | -0.33                      | 0.4   | -1    | -0.28  | -0.67 | -0.12 | -0.38 | 1810 | 1150                       | 2070 | 870  | 1590 | 1060 | 1630 | 1350 | 1088  | 2173.2 | 2 | 0.0015 | 0.681 |
| Uncharacterized protein<br>OS=Callithrix jacchus GN=MYH9<br>PE=4 SV=1 | tr F6YYM7 F6YYM7_CALJA, tr F6ZZ90 F6ZZ90_CALJA | aNL<br>QID<br>QINT<br>DLNL<br>ER | 95% | 65.9 | 54.38671 | Ref | -0.08                      | -0.09 | -0.46 | -0.26  | -0.49 | -0.03 | -0.26 | 4270 | 4050                       | 4380 | 3800 | 4820 | 3580 | 5140 | 4340 | 725.4 | 2173.2 | 3 | 0.0018 | 0.849 |
| Uncharacterized protein<br>OS=Callithrix jacchus GN=MYH9<br>PE=4 SV=1 | tr F6YYM7 F6YYM7_CALJA, tr F6ZZ90 F6ZZ90_CALJA | aQQ<br>AAD<br>k                  | 95% | 44   | 48.91627 | Ref | Value Missing (-2.9482133) | -0.04 | -0.41 | -0.15  | 0.16  | -0.05 | 0.33  | 463  | Value Missing (-2.9482133) | 562  | 488  | 645  | 700  | 631  | 812  | 539.3 | 1076.6 | 2 | 0.0123 | 11.42 |
| Uncharacterized protein<br>OS=Callithrix jacchus GN=MYH9<br>PE=4 SV=1 | tr F6YYM7 F6YYM7_CALJA, tr F6ZZ90 F6ZZ90_CALJA | aQQ<br>AAD<br>k                  | 95% | 44.9 | 49.01153 | Ref | Value Missing (-2.5589364) | 0.19  | -0.74 | -0.068 | 0.21  | -0.58 | -0.06 | 2350 | Value Missing (-2.5589364) | 2120 | 1250 | 2190 | 2320 | 1400 | 1990 | 539.3 | 1076.6 | 2 | 0.0108 | 10.07 |
| Uncharacterized protein<br>OS=Callithrix jacchus GN=MYH9<br>PE=4 SV=1 | tr F6YYM7 F6YYM7_CALJA, tr F6ZZ90 F6ZZ90_CALJA | aQQ<br>AAD<br>k                  | 95% | 49.4 | 49.01153 | Ref | Value Missing (-2.5594263) | 0.12  | -0.79 | 0.006  | 0.28  | -0.32 | 0.068 | 1380 | Value Missing (-2.5594263) | 1500 | 896  | 1710 | 1810 | 1250 | 1620 | 539.3 | 1076.6 | 2 | 0.0105 | 9.715 |
| Uncharacterized protein<br>OS=Callithrix jacchus GN=MYH9<br>PE=4 SV=1 | tr F6YYM7 F6YYM7_CALJA, tr F6ZZ90 F6ZZ90_CALJA | aQQ<br>AAD<br>k                  | 89% | 38.1 | 48.91091 | Ref | Value Missing (-2.464861)  | 0.16  | -0.73 | -0.19  | 0.11  | -0.28 | -0.19 | 1040 | Value Missing (-2.464861)  | 846  | 515  | 824  | 883  | 703  | 743  | 539.3 | 1076.6 | 2 | 0.0079 | 7.339 |



|                                                                       |                                                |                            |     |      |          |     |                            |       |       |        |       |       |       |       |                            |       |       |       |       |       |       |       |        |   |        |       |
|-----------------------------------------------------------------------|------------------------------------------------|----------------------------|-----|------|----------|-----|----------------------------|-------|-------|--------|-------|-------|-------|-------|----------------------------|-------|-------|-------|-------|-------|-------|-------|--------|---|--------|-------|
| Uncharacterized protein<br>OS=Callithrix jacchus GN=MYH9<br>PE=4 SV=1 | tr F6YYM7 F6YYM7_CALJA, tr F6ZZ90 F6ZZ90_CALJA | aQQ<br>AAD                 | 75% | 32.7 | 48.91627 | Ref | Value Missing (-3.1708345) | -0.18 | -0.37 | -0.36  | 0.2   | -0.08 | 0.33  | 905   | Value Missing (-3.1708345) | 802   | 786   | 875   | 1120  | 967   | 1280  | 539.3 | 1076.6 | 2 | 0.0123 | 11.42 |
| Uncharacterized protein<br>OS=Callithrix jacchus GN=MYH9<br>PE=4 SV=1 | tr F6YYM7 F6YYM7_CALJA, tr F6ZZ90 F6ZZ90_CALJA | aQQ<br>AAD                 | 88% | 37.5 | 48.91627 | Ref | Value Missing (-2.1018224) | -0.08 | -0.6  | -0.27  | 0.082 | -0.2  | 0.24  | 1500  | Value Missing (-2.1018224) | 1260  | 986   | 1360  | 1520  | 1300  | 1760  | 539.3 | 1076.6 | 2 | 0.0123 | 11.42 |
| Uncharacterized protein<br>OS=Callithrix jacchus GN=MYH9<br>PE=4 SV=1 | tr F6YYM7 F6YYM7_CALJA, tr F6ZZ90 F6ZZ90_CALJA | aQQ<br>AAD                 | 74% | 32.6 | 49.01153 | Ref | Value Missing (-1.6794324) | -0.03 | -0.89 | -0.12  | -0.06 | -0.16 | 0.19  | 1080  | Value Missing (-1.6794324) | 908   | 563   | 1060  | 961   | 935   | 1190  | 539.3 | 1076.6 | 2 | 0.0106 | 9.826 |
| Uncharacterized protein<br>OS=Callithrix jacchus GN=MYH9<br>PE=4 SV=1 | tr F6YYM7 F6YYM7_CALJA, tr F6ZZ90 F6ZZ90_CALJA | aSIT<br>ALEA               | 77% | 36.7 | 51.44198 | Ref | -0.38                      | -0.03 | -0.5  | -0.096 | -0.28 | -0.25 | -0.24 | 14600 | 10300                      | 14400 | 11600 | 16900 | 13000 | 13800 | 13800 | 504.6 | 1510.9 | 3 | 0.0229 | 15.17 |
| Uncharacterized protein<br>OS=Callithrix jacchus GN=MYH9<br>PE=4 SV=1 | tr F6YYM7 F6YYM7_CALJA, tr F6ZZ90 F6ZZ90_CALJA | aSIT<br>ALEA               | 95% | 53   | 50.86716 | Ref | -0.37                      | 0.096 | -0.44 | -0.21  | -0.35 | -0.15 | -0.31 | 18600 | 13800                      | 20600 | 15900 | 20500 | 16300 | 19600 | 17400 | 756.5 | 1510.9 | 2 | 0.0102 | 6.768 |
| Uncharacterized protein<br>OS=Callithrix jacchus GN=MYH9<br>PE=4 SV=1 | tr F6YYM7 F6YYM7_CALJA, tr F6ZZ90 F6ZZ90_CALJA | eLED<br>ATET<br>ADA<br>MNR | 95% | 63.3 | 49.1494  | Ref | -0.71                      | 0.19  | -0.97 | -0.29  | -0.27 | -0    | -0.24 | 19500 | 9560                       | 19400 | 9740  | 17100 | 15200 | 19100 | 16100 | 935.4 | 1868.9 | 2 | 0.0151 | 8.08  |

|                                                                    |                                                |                            |     |      |          |     |       |      |       |       |       |       |       |       |        |       |        |        |       |       |        |       |        |   |        |       |
|--------------------------------------------------------------------|------------------------------------------------|----------------------------|-----|------|----------|-----|-------|------|-------|-------|-------|-------|-------|-------|--------|-------|--------|--------|-------|-------|--------|-------|--------|---|--------|-------|
| Uncharacterized protein<br>OS=Callithrix jacchus GN=MYH9 PE=4 SV=1 | tr F6YYM7 F6YYM7_CALJA, tr F6ZZ90 F6ZZ90_CALJA | eLED<br>ATET<br>ADA<br>MNR | 91% | 39.6 | 49.18119 | Ref | -0.45 | 0.29 | -0.79 | -0.28 | -0.23 | -0.39 | -0.16 | 10300 | 6720   | 12200 | 6470   | 10100  | 9170  | 8550  | 9980   | 935.4 | 1868.9 | 2 | 0.0144 | 7.695 |
| Uncharacterized protein<br>OS=Callithrix jacchus GN=MYH9 PE=4 SV=1 | tr F6YYM7 F6YYM7_CALJA, tr F6ZZ90 F6ZZ90_CALJA | eME<br>AELE<br>DER         | 94% | 41.4 | 47.72586 | Ref | -0.59 | 0.4  | -0.58 | -0.22 | -0.57 | -0.04 | -0.57 | 54900 | 31500  | 67800 | 38600  | 54600  | 37500 | 56400 | 38700  | 777.9 | 1553.7 | 2 | 0.013  | 8.382 |
| Uncharacterized protein<br>OS=Callithrix jacchus GN=MYH9 PE=4 SV=1 | tr F6YYM7 F6YYM7_CALJA, tr F6ZZ90 F6ZZ90_CALJA | eME<br>AELE<br>DER         | 95% | 42.4 | 47.77644 | Ref | -0.37 | 0.35 | -1.1  | -0.25 | -0.53 | -0.08 | -0.34 | 78500 | 50100  | 89400 | 37400  | 73000  | 52600 | 75000 | 62200  | 777.9 | 1553.7 | 2 | 0.0122 | 7.842 |
| Uncharacterized protein<br>OS=Callithrix jacchus GN=MYH9 PE=4 SV=1 | tr F6YYM7 F6YYM7_CALJA, tr F6ZZ90 F6ZZ90_CALJA | emE<br>AELE<br>DER         | 51% | 26   | 46.7408  | Ref | -0.71 | 0.25 | -0.34 | -0.36 | -0.37 | -0.17 | -0.09 | 6020  | 3680   | 7740  | 5770   | 6310   | 5470  | 6530  | 6860   | 785.9 | 1569.7 | 2 | 0.0123 | 7.835 |
| Uncharacterized protein<br>OS=Callithrix jacchus GN=MYH9 PE=4 SV=1 | tr F6YYM7 F6YYM7_CALJA, tr F6ZZ90 F6ZZ90_CALJA | gALA<br>LEEK               | 69% | 33.6 | 51.11313 | Ref | -0.31 | 0.11 | -0.4  | -0.44 | -0.4  | -0.2  | -0.55 | 2E+05 | 110000 | 2E+05 | 125000 | 135000 | 1E+05 | 1E+05 | 113000 | 719.9 | 1437.8 | 2 | 0.018  | 12.54 |
| Uncharacterized protein<br>OS=Callithrix jacchus GN=MYH9 PE=4 SV=1 | tr F6YYM7 F6YYM7_CALJA, tr F6ZZ90 F6ZZ90_CALJA | gALA<br>LEEK               | 53% | 31   | 51.12132 | Ref | -0.25 | 0.15 | -0.59 | -0.4  | -0.35 | -0.43 | -0.43 | 1E+05 | 61600  | 88500 | 59400  | 74700  | 67600 | 66900 | 66000  | 480.3 | 1437.9 | 3 | 0.0122 | 8.469 |

|                                                                    |                                                |                                   |     |      |          |     |       |      |       |        |       |       |       |       |       |       |       |       |       |       |       |       |        |   |        |       |
|--------------------------------------------------------------------|------------------------------------------------|-----------------------------------|-----|------|----------|-----|-------|------|-------|--------|-------|-------|-------|-------|-------|-------|-------|-------|-------|-------|-------|-------|--------|---|--------|-------|
| Uncharacterized protein<br>OS=Callithrix jacchus GN=MYH9 PE=4 SV=1 | tr F6YYM7 F6YYM7_CALJA, tr F6ZZ90 F6ZZ90_CALJA | gALALEEK                          | 95% | 45.7 | 51.13325 | Ref | -0.45 | 0.23 | -0.54 | -0.24  | -0.4  | -0.15 | -0.39 | 23900 | 15400 | 26700 | 17600 | 23800 | 18700 | 23200 | 19400 | 719.9 | 1437.8 | 2 | 0.026  | 18.06 |
| Uncharacterized protein<br>OS=Callithrix jacchus GN=MYH9 PE=4 SV=1 | tr F6YYM7 F6YYM7_CALJA, tr F6ZZ90 F6ZZ90_CALJA | gALALEEK                          | 85% | 39.4 | 50.82419 | Ref | -0.77 | 0.39 | -0.76 | -0.13  | -0.58 | -0.23 | -0.29 | 1E+05 | 48000 | 1E+05 | 58600 | 99800 | 64000 | 85100 | 81200 | 480.3 | 1437.9 | 3 | 0.0137 | 9.554 |
| Uncharacterized protein<br>OS=Callithrix jacchus GN=MYH9 PE=4 SV=1 | tr F6YYM7 F6YYM7_CALJA, tr F6ZZ90 F6ZZ90_CALJA | hSQ<br>AVEE<br>LAEQ<br>LEQT<br>k  | 95% | 54   | 54.8141  | Ref | -0.32 | 0.17 | -0.54 | -0.099 | -0.62 | -0.01 | -0.41 | 643   | 501   | 767   | 526   | 786   | 479   | 764   | 574   | 816.8 | 2447.3 | 3 | 0.0132 | 5.378 |
| Uncharacterized protein<br>OS=Callithrix jacchus GN=MYH9 PE=4 SV=1 | tr F6YYM7 F6YYM7_CALJA, tr F6ZZ90 F6ZZ90_CALJA | hSQ<br>AVEE<br>LAEQ<br>LEQT<br>kR | 74% | 37.3 | 55.02587 | Ref | -0.45 | 0.15 | -0.41 | -0.24  | -0.42 | -0.03 | -0.29 | 6550  | 4810  | 7910  | 6020  | 7490  | 5770  | 7890  | 6570  | 651.9 | 2603.4 | 4 | 0.0309 | 11.86 |
| Uncharacterized protein<br>OS=Callithrix jacchus GN=MYH9 PE=4 SV=1 | tr F6YYM7 F6YYM7_CALJA, tr F6ZZ90 F6ZZ90_CALJA | hSQ<br>AVEE<br>LAEQ<br>LEQT<br>kR | 61% | 30.6 | 54.8427  | Ref | -0.41 | 0.18 | -0.49 | -0.2   | -0.51 | -0.1  | -0.26 | 5020  | 3630  | 5940  | 4190  | 5630  | 3980  | 5490  | 4880  | 521.7 | 2603.4 | 5 | 0.0102 | 3.933 |
| Uncharacterized protein<br>OS=Callithrix jacchus GN=MYH9 PE=4 SV=1 | tr F6YYM7 F6YYM7_CALJA, tr F6ZZ90 F6ZZ90_CALJA | iAEF<br>TTNL<br>MEE<br>EEK        | 94% | 51.6 | 54.16091 | Ref | -0.2  | 0.17 | -0.56 | -0.31  | -0.39 | -0.21 | -0.28 | 2480  | 2060  | 2900  | 1960  | 2580  | 2130  | 2510  | 2380  | 764.7 | 2291.2 | 3 | 0.0184 | 8.014 |

|                                                                       |                                                |                                   |     |      |          |     |       |       |       |       |       |       |       |       |       |       |      |       |       |       |       |       |        |   |        |       |
|-----------------------------------------------------------------------|------------------------------------------------|-----------------------------------|-----|------|----------|-----|-------|-------|-------|-------|-------|-------|-------|-------|-------|-------|------|-------|-------|-------|-------|-------|--------|---|--------|-------|
| Uncharacterized protein<br>OS=Callithrix jacchus GN=MYH9<br>PE=4 SV=1 | tr F6YYM7 F6YYM7_CALJA, tr F6ZZ90 F6ZZ90_CALJA | iAQL<br>EEQL<br>DNE<br>Tk         | 92% | 48   | 54.14094 | Ref | -0.24 | 0.22  | -0.62 | -0.25 | -0.43 | -0.22 | -0.45 | 6590  | 4840  | 7210  | 4530 | 6460  | 4980  | 6030  | 5100  | 713.7 | 2138.2 | 3 | 0.0137 | 6.42  |
| Uncharacterized protein<br>OS=Callithrix jacchus GN=MYH9<br>PE=4 SV=1 | tr F6YYM7 F6YYM7_CALJA, tr F6ZZ90 F6ZZ90_CALJA | iAQL<br>EEqL<br>DnET<br>k         | 88% | 44.5 | 54.20136 | Ref | -0.21 | -0.07 | -0.4  | -0.28 | -0.38 | -0.14 | -0.24 | 3440  | 2800  | 3350  | 3000 | 3600  | 2930  | 3610  | 3350  | 714.4 | 2140.1 | 3 | 0.0048 | 2.223 |
| Uncharacterized protein<br>OS=Callithrix jacchus GN=MYH9<br>PE=4 SV=1 | tr F6YYM7 F6YYM7_CALJA, tr F6ZZ90 F6ZZ90_CALJA | kANL<br>QID<br>QINT<br>DLNL<br>ER | 87% | 44   | 54.09037 | Ref | -0.36 | 0.19  | -0.8  | -0.11 | -0.49 | -0.08 | -0.35 | 14800 | 10200 | 16300 | 9210 | 16300 | 11000 | 15300 | 12500 | 869.5 | 2605.4 | 3 | 0.0207 | 7.933 |
| Uncharacterized protein<br>OS=Callithrix jacchus GN=MYH9<br>PE=4 SV=1 | tr F6YYM7 F6YYM7_CALJA, tr F6ZZ90 F6ZZ90_CALJA | kANL<br>QID<br>QINT<br>DLNL<br>ER | 85% | 42.6 | 54.16271 | Ref | -0.59 | 0.44  | -0.78 | -0.71 | -0.49 | -0.02 | -0.31 | 14000 | 7220  | 16000 | 7690 | 8870  | 9050  | 13100 | 10600 | 869.5 | 2605.4 | 3 | 0.0238 | 9.13  |
| Uncharacterized protein<br>OS=Callithrix jacchus GN=MYH9<br>PE=4 SV=1 | tr F6YYM7 F6YYM7_CALJA, tr F6ZZ90 F6ZZ90_CALJA | kFD<br>QLLA<br>EEk                | 66% | 34.6 | 52.21975 | Ref | -0.51 | 0.24  | -0.62 | -0.2  | -0.47 | -0.05 | -0.47 | 13600 | 8040  | 14700 | 9110 | 13400 | 9700  | 13500 | 10100 | 711.8 | 2132.2 | 3 | 0.0289 | 13.53 |
| Uncharacterized protein<br>OS=Callithrix jacchus GN=MYH9<br>PE=4 SV=1 | tr F6YYM7 F6YYM7_CALJA, tr F6ZZ90 F6ZZ90_CALJA | kVEA<br>QLQ<br>ELQV<br>k          | 91% | 43.6 | 49.98843 | Ref | -0.42 | 0.19  | -0.55 | -0.22 | -0.59 | -0    | -0.36 | 2700  | 1810  | 2990  | 2000 | 2780  | 1870  | 2950  | 2280  | 775.8 | 2324.4 | 3 | 0.0356 | 15.3  |

|                                                                       |                                                |                      |     |      |          |     |       |      |       |       |       |       |       |       |        |       |        |        |       |       |        |       |        |   |        |       |
|-----------------------------------------------------------------------|------------------------------------------------|----------------------|-----|------|----------|-----|-------|------|-------|-------|-------|-------|-------|-------|--------|-------|--------|--------|-------|-------|--------|-------|--------|---|--------|-------|
| Uncharacterized protein<br>OS=Callithrix jacchus GN=MYH9<br>PE=4 SV=1 | tr F6YYM7 F6YYM7_CALJA, tr F6ZZ90 F6ZZ90_CALJA | IEVN LQA Mk          | 61% | 33.7 | 52.34125 | Ref | -0.6  | 0.23 | -0.61 | -0.39 | -0.26 | -0    | -0.74 | 10500 | 5160   | 9960  | 6260   | 8020   | 7680  | 9590  | 5700   | 552   | 1653   | 3 | 0.0156 | 9.442 |
| Uncharacterized protein<br>OS=Callithrix jacchus GN=MYH9<br>PE=4 SV=1 | tr F6YYM7 F6YYM7_CALJA, tr F6ZZ90 F6ZZ90_CALJA | IEVN LQA Mk          | 56% | 32.9 | 52.52484 | Ref | -0.56 | 0.16 | -0.77 | -0.12 | -0.38 | 0.016 | -0.38 | 21400 | 12700  | 22700 | 13400  | 23100  | 16900 | 23200 | 17500  | 552   | 1653   | 3 | 0.0189 | 11.44 |
| Uncharacterized protein<br>OS=Callithrix jacchus GN=MYH9<br>PE=4 SV=1 | tr F6YYM7 F6YYM7_CALJA, tr F6ZZ90 F6ZZ90_CALJA | IEVN LQA Mk          | 95% | 46.9 | 52.2273  | Ref | -0.33 | 0.12 | -0.68 | -0.17 | -0.51 | 0.016 | -0.38 | 6830  | 4910   | 7270  | 4690   | 7330   | 5070  | 7620  | 5740   | 827.5 | 1653   | 2 | 0.0069 | 4.191 |
| Uncharacterized protein<br>OS=Callithrix jacchus GN=MYH9<br>PE=4 SV=1 | tr F6YYM7 F6YYM7_CALJA, tr F6ZZ90 F6ZZ90_CALJA | IEVN LQA mk          | 85% | 39.5 | 52.32907 | Ref | -0.47 | 0.31 | -0.67 | -0.27 | -0.48 | 0.087 | -0.49 | 8560  | 5770   | 10700 | 6100   | 8920   | 6730  | 10400 | 6930   | 835.5 | 1669   | 2 | 0.0147 | 8.829 |
| Uncharacterized protein<br>OS=Callithrix jacchus GN=MYH9<br>PE=4 SV=1 | tr F6YYM7 F6YYM7_CALJA, tr F6ZZ90 F6ZZ90_CALJA | IQE MEG TVk          | 73% | 36.7 | 52.74038 | Ref | -0.57 | 0.43 | -0.83 | -0.2  | -0.46 | -0.12 | -0.38 | 2E+05 | 130000 | 3E+05 | 132000 | 226000 | 2E+05 | 2E+05 | 180000 | 548.3 | 1641.9 | 3 | 0.0151 | 9.173 |
| Uncharacterized protein<br>OS=Callithrix jacchus GN=MYH9<br>PE=4 SV=1 | tr F6YYM7 F6YYM7_CALJA, tr F6ZZ90 F6ZZ90_CALJA | IQQE LDDL LVDL DHQ R | 95% | 65.6 | 54.5225  | Ref | -0.17 | 0.28 | -0.61 | -0.12 | -0.88 | -0.03 | -0.8  | 310   | 224    | 331   | 202    | 311    | 161   | 301   | 176    | 752.1 | 2253.2 | 3 | 0.0122 | 5.404 |

|                                                                       |                                                |                                         |     |      |          |     |                         |                               |                            |                               |                            |                                |                         |                        |                         |                               |                            |                              |                            |                                |                         |       |        |   |        |       |
|-----------------------------------------------------------------------|------------------------------------------------|-----------------------------------------|-----|------|----------|-----|-------------------------|-------------------------------|----------------------------|-------------------------------|----------------------------|--------------------------------|-------------------------|------------------------|-------------------------|-------------------------------|----------------------------|------------------------------|----------------------------|--------------------------------|-------------------------|-------|--------|---|--------|-------|
| Uncharacterized protein<br>OS=Callithrix jacchus GN=MYH9<br>PE=4 SV=1 | tr F6YYM7 F6YYM7_CALJA, tr F6ZZ90 F6ZZ90_CALJA | IQQE<br>LDDL<br>LVDL<br>DHQ<br>R        | 58% | 35.3 | 54.52676 | Ref | No Values (-0.37285936) | Reference Missing (1.1796201) | No Values (-0.6571477)     | No Values (-0.7976267)        | No Values (-0.6017543)     | No Values (-0.6645209)         | No Values (-0.65364695) | No Values (-0.5752495) | No Values (-0.37285936) | Reference Missing (1.1796201) | No Values (-0.6571477)     | No Values (-0.7976267)       | No Values (-0.6017543)     | No Values (-0.6645209)         | No Values (-0.65364695) | 752.1 | 2253.2 | 3 | 0.0102 | 4.512 |
| Uncharacterized protein<br>OS=Callithrix jacchus GN=MYH9<br>PE=4 SV=1 | tr F6YYM7 F6YYM7_CALJA, tr F6ZZ90 F6ZZ90_CALJA | IQQE<br>LDDL<br>LVDL<br>DHQ<br>R        | 95% | 65.9 | 54.52717 | Ref | -0.2                    | 0.22                          | Value Missing (-2.2285376) | 0.17                          | Value Missing (-2.1731443) | 0.36                           | -0.32                   | 184                    | 119                     | 173                           | Value Missing (-2.2285376) | 207                          | Value Missing (-2.1731443) | 215                            | 134                     | 752.1 | 2253.2 | 3 | 0.01   | 4.433 |
| Uncharacterized protein<br>OS=Callithrix jacchus GN=MYH9<br>PE=4 SV=1 | tr F6YYM7 F6YYM7_CALJA, tr F6ZZ90 F6ZZ90_CALJA | IQQE<br>LDDL<br>LVDL<br>DHQ<br>R        | 93% | 50.1 | 54.50084 | Ref | No Values (-1.1854582)  | Reference Missing (0.867465)  | No Values (-1.4697465)     | Reference Missing (0.7789115) | No Values (-1.4143531)     | Reference Missing (0.46843225) | No Values (-1.4662458)  | No Values (-1.3878485) | No Values (-1.1854582)  | Reference Missing (0.86723)   | No Values (-1.4697465)     | Reference Missing (0.778915) | No Values (-1.4143531)     | Reference Missing (0.46843225) | No Values (-1.4662458)  | 752.1 | 2253.2 | 3 | 0.0017 | 0.758 |
| Uncharacterized protein<br>OS=Callithrix jacchus GN=MYH9<br>PE=4 SV=1 | tr F6YYM7 F6YYM7_CALJA, tr F6ZZ90 F6ZZ90_CALJA | IQVE<br>LDN<br>VTGL<br>LTQS<br>DSK      | 95% | 84.3 | 54.23231 | Ref | -0.38                   | 0.31                          | -0.68                      | -0.26                         | -0.52                      | 0.14                           | -0.57                   | 10600                  | 7950                    | 13900                         | 7850                       | 11600                        | 8450                       | 14000                          | 8450                    | 856.8 | 2567.4 | 3 | 0.0107 | 4.159 |
| Uncharacterized protein<br>OS=Callithrix jacchus GN=MYH9<br>PE=4 SV=1 | tr F6YYM7 F6YYM7_CALJA, tr F6ZZ90 F6ZZ90_CALJA | qAQ<br>QER<br>DELA<br>DEIA<br>NSS<br>Gk | 83% | 42.6 | 55.09005 | Ref | -0.46                   | 0.021                         | -0.6                       | -0.23                         | -0.37                      | -0.08                          | -0.2                    | 5010                   | 3170                    | 4800                          | 3510                       | 5010                         | 3960                       | 5040                           | 4620                    | 899.8 | 2696.4 | 3 | 0.0168 | 6.24  |
| Uncharacterized protein<br>OS=Callithrix jacchus GN=MYH9<br>PE=4 SV=1 | tr F6YYM7 F6YYM7_CALJA, tr F6ZZ90 F6ZZ90_CALJA | qAQ<br>QER<br>DELA<br>DEIA<br>nSSG<br>k | 53% | 34.8 | 54.96609 | Ref | -0.57                   | 0.22                          | -0.56                      | -0.24                         | -0.62                      | 0.015                          | -0.46                   | 18600                  | 10000                   | 18700                         | 12200                      | 16900                        | 11300                      | 18300                          | 13100                   | 900.1 | 2697.3 | 3 | 0.0213 | 7.886 |

|                                                                       |                                                |                     |     |      |          |     |       |       |       |       |       |       |       |       |       |       |       |        |       |       |       |       |        |   |        |       |
|-----------------------------------------------------------------------|------------------------------------------------|---------------------|-----|------|----------|-----|-------|-------|-------|-------|-------|-------|-------|-------|-------|-------|-------|--------|-------|-------|-------|-------|--------|---|--------|-------|
| Uncharacterized protein<br>OS=Callithrix jacchus GN=MYH9<br>PE=4 SV=1 | tr F6YYM7 F6YYM7_CALJA, tr F6ZZ90 F6ZZ90_CALJA | qLEE<br>AEEE<br>AQR | 95% | 65   | 50.37897 | Ref | -0.29 | 0.23  | -0.86 | -0.31 | -0.31 | -0.3  | -0.22 | 9670  | 6750  | 10500 | 5550  | 8950   | 7810  | 8190  | 8630  | 818.4 | 1634.8 | 2 | 0.0155 | 9.466 |
| Uncharacterized protein<br>OS=Callithrix jacchus GN=MYH9<br>PE=4 SV=1 | tr F6YYM7 F6YYM7_CALJA, tr F6ZZ90 F6ZZ90_CALJA | qLEE<br>AEEE<br>AQR | 81% | 36.3 | 50.47617 | Ref | -0.3  | 0.26  | -0.74 | -0.24 | -0.55 | -0.32 | -0.29 | 14900 | 9630  | 15400 | 8630  | 13500  | 9490  | 11600 | 11800 | 818.4 | 1634.8 | 2 | 0.0127 | 7.742 |
| Uncharacterized protein<br>OS=Callithrix jacchus GN=MYH9<br>PE=4 SV=1 | tr F6YYM7 F6YYM7_CALJA, tr F6ZZ90 F6ZZ90_CALJA | qLEE<br>AEEE<br>AQR | 95% | 65.3 | 50.51519 | Ref | -0.59 | 0.36  | -0.81 | -0.24 | -0.45 | -0.07 | -0.36 | 1E+05 | 61200 | 1E+05 | 63900 | 104000 | 78800 | 1E+05 | 86800 | 818.4 | 1634.8 | 2 | 0.0125 | 7.668 |
| Uncharacterized protein<br>OS=Callithrix jacchus GN=MYH9<br>PE=4 SV=1 | tr F6YYM7 F6YYM7_CALJA, tr F6ZZ90 F6ZZ90_CALJA | qLEE<br>AEEE<br>AQR | 94% | 47.6 | 50.62822 | Ref | -0.32 | 0.018 | -0.9  | -0.13 | -0.16 | -0.34 | -0.31 | 26400 | 16900 | 23200 | 13800 | 26000  | 22000 | 20400 | 20600 | 545.9 | 1634.8 | 3 | 0.009  | 5.483 |
| Uncharacterized protein<br>OS=Callithrix jacchus GN=MYH9<br>PE=4 SV=1 | tr F6YYM7 F6YYM7_CALJA, tr F6ZZ90 F6ZZ90_CALJA | rGDL<br>PFVV<br>PR  | 92% | 45.5 | 51.33858 | Ref | -0.4  | 0.38  | -0.37 | -0.44 | -0.46 | -0.35 | -0.22 | 2390  | 1750  | 3250  | 2170  | 2270   | 1960  | 2200  | 2410  | 487.3 | 1458.8 | 3 | 0.0132 | 9.063 |
| Uncharacterized protein<br>OS=Callithrix jacchus GN=MYH9<br>PE=4 SV=1 | tr F6YYM7 F6YYM7_CALJA, tr F6ZZ90 F6ZZ90_CALJA | rGDL<br>PFVV<br>PR  | 79% | 37.4 | 51.45945 | Ref | -0.46 | 0.37  | -0.25 | -0.29 | -0.61 | -0.06 | -0.43 | 45200 | 35300 | 68000 | 49500 | 53100  | 37300 | 56900 | 43600 | 487.3 | 1458.8 | 3 | 0.0186 | 12.76 |

|                                                                       |                                                |                 |     |      |          |     |       |       |       |       |       |       |       |       |       |       |       |       |       |       |       |       |        |   |        |       |
|-----------------------------------------------------------------------|------------------------------------------------|-----------------|-----|------|----------|-----|-------|-------|-------|-------|-------|-------|-------|-------|-------|-------|-------|-------|-------|-------|-------|-------|--------|---|--------|-------|
| Uncharacterized protein<br>OS=Callithrix jacchus GN=MYH9<br>PE=4 SV=1 | tr F6YYM7 F6YYM7_CALJA, tr F6ZZ90 F6ZZ90_CALJA | rGDL PFVV PR    | 81% | 38.1 | 51.32557 | Ref | -0.56 | 0.4   | -0.18 | -0.27 | -0.78 | -0.05 | -0.52 | 79200 | 52200 | 1E+05 | 82400 | 85500 | 52400 | 91200 | 65300 | 487.3 | 1458.8 | 3 | 0.0116 | 7.932 |
| Uncharacterized protein<br>OS=Callithrix jacchus GN=MYH9<br>PE=4 SV=1 | tr F6YYM7 F6YYM7_CALJA, tr F6ZZ90 F6ZZ90_CALJA | rGDL PFVV PR    | 88% | 41.8 | 51.44789 | Ref | -0.47 | 0.21  | -0.18 | -0.25 | -0.59 | 0.037 | -0.27 | 36900 | 31600 | 55000 | 47200 | 49500 | 34200 | 55200 | 44200 | 487.3 | 1458.8 | 3 | 0.0177 | 12.15 |
| Uncharacterized protein<br>OS=Callithrix jacchus GN=MYH9<br>PE=4 SV=1 | tr F6YYM7 F6YYM7_CALJA, tr F6ZZ90 F6ZZ90_CALJA | rGDL PFVV PR    | 89% | 42.2 | 51.14971 | Ref | -0.36 | 0.19  | -0.4  | -0.25 | -0.43 | -0.13 | -0.46 | 18900 | 13700 | 21700 | 16200 | 19800 | 15300 | 19600 | 15500 | 487.3 | 1458.9 | 3 | 0.0089 | 6.124 |
| Uncharacterized protein<br>OS=Callithrix jacchus GN=MYH9<br>PE=4 SV=1 | tr F6YYM7 F6YYM7_CALJA, tr F6ZZ90 F6ZZ90_CALJA | rGDL PFVV PR    | 74% | 35.3 | 51.14971 | Ref | -0.44 | 0.078 | -0.24 | -0.21 | -0.44 | -0.07 | -0.38 | 1170  | 854   | 1330  | 1200  | 1340  | 1000  | 1350  | 1080  | 487.3 | 1458.9 | 3 | 0.009  | 6.186 |
| Uncharacterized protein<br>OS=Callithrix jacchus GN=MYH9<br>PE=4 SV=1 | tr F6YYM7 F6YYM7_CALJA, tr F6ZZ90 F6ZZ90_CALJA | rQLE EAEE EAQ R | 95% | 50.8 | 52.05824 | Ref | -0.57 | 0.3   | -0.69 | -0.23 | -0.22 | -0.13 | -0.49 | 1910  | 1140  | 2270  | 1280  | 1940  | 1710  | 1900  | 1470  | 896.5 | 1790.9 | 2 | 0.0135 | 7.544 |
| Uncharacterized protein<br>OS=Callithrix jacchus GN=MYH9<br>PE=4 SV=1 | tr F6YYM7 F6YYM7_CALJA, tr F6ZZ90 F6ZZ90_CALJA | rELA Dk         | 60% | 32.6 | 51.45174 | Ref | -0.67 | 0.39  | -0.89 | -0.24 | -0.72 | 0.11  | -0.5  | 27300 | 13200 | 29800 | 13900 | 23900 | 14900 | 27800 | 18000 | 428.9 | 1283.7 | 3 | 0.0204 | 15.86 |



|                                                                            |                                                |                                   |     |      |          |     |        |       |       |       |       |       |       |       |       |       |       |       |       |       |       |       |        |   |        |       |
|----------------------------------------------------------------------------|------------------------------------------------|-----------------------------------|-----|------|----------|-----|--------|-------|-------|-------|-------|-------|-------|-------|-------|-------|-------|-------|-------|-------|-------|-------|--------|---|--------|-------|
| Uncharacterized protein<br>OS=Callithrix jacchus GN=MYH9 PE=4 SV=1         | tr F6YYM7 F6YYM7_CALJA, tr F6ZZ90 F6ZZ90_CALJA | tQLE<br>ELED<br>ELQA<br>TED<br>Ak | 74% | 39   | 54.7837  | Ref | -0.18  | -0.1  | -0.33 | -0.21 | -0.33 | -0.16 | -0.46 | 1670  | 1350  | 1560  | 1490  | 1780  | 1430  | 1680  | 1360  | 857.4 | 2569.3 | 3 | 0.0165 | 6.402 |
| Uncharacterized protein<br>OS=Callithrix jacchus GN=MYH9 PE=4 SV=1         | tr F6YYM7 F6YYM7_CALJA, tr F6ZZ90 F6ZZ90_CALJA | vEA<br>QLQ<br>ELQV<br>k           | 90% | 43.9 | 51.7981  | Ref | -0.22  | 0.65  | -0.87 | -0.69 | -0.84 | -0.27 | -0.33 | 5150  | 3590  | 7140  | 2800  | 3470  | 2740  | 4250  | 4040  | 631.7 | 1892.1 | 3 | 0.0149 | 7.893 |
| Uncharacterized protein (Fragment)<br>OS=Canis familiaris GN=NCL PE=4 SV=1 | tr F1Q0B0 F1Q0B0_CANFA                         | aLEL<br>TGLk                      | 74% | 34.1 | 49.84815 | Ref | -0.079 | -0.42 | -0.18 | -0.32 | 0.2   | -0.63 | 0.032 | 12000 | 9730  | 8320  | 11100 | 11100 | 13900 | 8100  | 12800 | 485   | 1451.9 | 3 | 0.0278 | 19.13 |
| Uncharacterized protein (Fragment)<br>OS=Canis familiaris GN=NCL PE=4 SV=1 | tr F1Q0B0 F1Q0B0_CANFA                         | aLEL<br>TGLk                      | 75% | 34.6 | 49.93    | Ref | -0.025 | -0.6  | -0.09 | -0.24 | 0.07  | -0.62 | 0.081 | 16300 | 13600 | 9940  | 15900 | 15700 | 17000 | 11000 | 17800 | 485   | 1451.9 | 3 | 0.0224 | 15.41 |
| Uncharacterized protein (Fragment)<br>OS=Canis familiaris GN=NCL PE=4 SV=1 | tr F1Q0B0 F1Q0B0_CANFA                         | aLEL<br>TGLk                      | 85% | 37   | 49.64867 | Ref | -0.25  | -0.4  | 0.009 | -0.15 | 0.12  | -0.72 | -0.03 | 43400 | 31200 | 30400 | 45300 | 44800 | 47200 | 27600 | 44000 | 727   | 1451.9 | 2 | 0.015  | 10.31 |

|                                                                               |                        |              |     |      |          |     |       |       |       |       |       |       |       |       |       |       |       |       |       |       |       |     |        |   |        |       |
|-------------------------------------------------------------------------------|------------------------|--------------|-----|------|----------|-----|-------|-------|-------|-------|-------|-------|-------|-------|-------|-------|-------|-------|-------|-------|-------|-----|--------|---|--------|-------|
| Uncharacterized protein (Fragment)<br>OS=Canis familiaris<br>GN=NCL PE=4 SV=1 | tr F1Q0B0 F1Q0B0_CANFA | aLEL<br>TGLk | 86% | 37.4 | 49.57516 | Ref | -0.21 | -0.42 | -0.06 | -0.31 | 0.18  | -0.5  | 0.019 | 28900 | 22300 | 20900 | 30100 | 27700 | 34000 | 22300 | 31600 | 727 | 1451.9 | 2 | 0.014  | 9.651 |
| Uncharacterized protein (Fragment)<br>OS=Canis familiaris<br>GN=NCL PE=4 SV=1 | tr F1Q0B0 F1Q0B0_CANFA | aLEL<br>TGLk | 69% | 32   | 49.133   | Ref | -0.22 | -0.37 | -0.17 | -0.12 | 0.1   | -0.71 | 0.047 | 16300 | 11700 | 11400 | 14700 | 16900 | 17100 | 10200 | 17100 | 485 | 1451.9 | 3 | 0.0044 | 3.062 |
| Uncharacterized protein (Fragment)<br>OS=Canis familiaris<br>GN=NCL PE=4 SV=1 | tr F1Q0B0 F1Q0B0_CANFA | aLEL<br>TGLk | 77% | 34.1 | 48.91443 | Ref | 0.076 | -0.34 | -0.16 | -0.33 | 0.051 | -0.79 | -0.04 | 18700 | 15700 | 12800 | 16300 | 15900 | 18100 | 10600 | 17600 | 485 | 1451.9 | 3 | 0.0029 | 1.988 |
| Uncharacterized protein (Fragment)<br>OS=Canis familiaris<br>GN=NCL PE=4 SV=1 | tr F1Q0B0 F1Q0B0_CANFA | aLEL<br>TGLk | 91% | 40.7 | 49.62412 | Ref | -0.27 | -0.49 | -0.04 | -0.2  | 0.21  | -0.58 | 0.023 | 51600 | 37900 | 35300 | 54100 | 53500 | 62200 | 37400 | 56400 | 727 | 1451.9 | 2 | 0.0143 | 9.816 |
| Uncharacterized protein (Fragment)<br>OS=Canis familiaris<br>GN=NCL PE=4 SV=1 | tr F1Q0B0 F1Q0B0_CANFA | aLEL<br>TGLk | 77% | 34.7 | 49.59152 | Ref | -0.3  | -0.38 | -0.17 | -0.26 | 0.2   | -0.64 | 0.1   | 50800 | 34500 | 35500 | 46100 | 47700 | 57000 | 33400 | 55500 | 485 | 1451.9 | 3 | 0.013  | 8.926 |

|                                                                               |                        |                          |     |      |          |     |        |       |       |       |       |       |       |       |       |       |       |       |       |       |       |       |        |   |        |       |
|-------------------------------------------------------------------------------|------------------------|--------------------------|-----|------|----------|-----|--------|-------|-------|-------|-------|-------|-------|-------|-------|-------|-------|-------|-------|-------|-------|-------|--------|---|--------|-------|
| Uncharacterized protein (Fragment)<br>OS=Canis familiaris<br>GN=NCL PE=4 SV=1 | tr F1Q0B0 F1Q0B0_CANFA | aLEL<br>TGLk             | 86% | 37.2 | 49.54392 | Ref | -0.26  | -0.48 | -0    | -0.25 | 0.18  | -0.67 | 0.087 | 47100 | 34400 | 32000 | 50200 | 46700 | 54800 | 31900 | 53300 | 727   | 1451.9 | 2 | 0.0116 | 7.958 |
| Uncharacterized protein (Fragment)<br>OS=Canis familiaris<br>GN=NCL PE=4 SV=1 | tr F1Q0B0 F1Q0B0_CANFA | aVVT<br>PGk              | 51% | 27.2 | 47.60083 | Ref | -0.023 | -0.29 | -0.21 | -0.42 | -0.13 | -0.53 | -0.03 | 28800 | 20500 | 18500 | 21900 | 20800 | 22400 | 17700 | 24900 | 427.3 | 1278.8 | 3 | 0.0058 | 4.504 |
| Uncharacterized protein (Fragment)<br>OS=Canis familiaris<br>GN=NCL PE=4 SV=1 | tr F1Q0B0 F1Q0B0_CANFA | eAM<br>EDG<br>EIDG<br>Nk | 95% | 62.2 | 51.80997 | Ref | -0.083 | -0.35 | -0.09 | -0.33 | 0.12  | -0.91 | -0.04 | 16100 | 11500 | 10400 | 14000 | 13000 | 15600 | 7980  | 14500 | 958.5 | 1914.9 | 2 | 0.0194 | 10.12 |
| Uncharacterized protein (Fragment)<br>OS=Canis familiaris<br>GN=NCL PE=4 SV=1 | tr F1Q0B0 F1Q0B0_CANFA | eVFE<br>DAV<br>EIR       | 87% | 40.2 | 51.83014 | Ref | 0.081  | -0.37 | -0.15 | -0.38 | 0.028 | -0.74 | -0.11 | 15000 | 11800 | 9360  | 12300 | 11500 | 13400 | 8170  | 12600 | 755.9 | 1509.8 | 2 | 0.0113 | 7.492 |
| Uncharacterized protein (Fragment)<br>OS=Canis familiaris<br>GN=NCL PE=4 SV=1 | tr F1Q0B0 F1Q0B0_CANFA | eVFE<br>DAV<br>EIR       | 92% | 43.6 | 51.93853 | Ref | 0.031  | -0.41 | -0.14 | -0.45 | 0.067 | -0.75 | -0.17 | 37200 | 26200 | 21000 | 28400 | 25200 | 31500 | 18800 | 27800 | 755.9 | 1509.8 | 2 | 0.0111 | 7.334 |

|                                                                               |                        |                            |     |      |          |     |       |       |       |       |       |       |       |       |       |       |       |       |       |       |       |       |        |   |        |       |
|-------------------------------------------------------------------------------|------------------------|----------------------------|-----|------|----------|-----|-------|-------|-------|-------|-------|-------|-------|-------|-------|-------|-------|-------|-------|-------|-------|-------|--------|---|--------|-------|
| Uncharacterized protein (Fragment)<br>OS=Canis familiaris<br>GN=NCL PE=4 SV=1 | tr F1Q0B0 F1Q0B0_CANFA | eVFE<br>DAV<br>EIR         | 57% | 32.1 | 51.9011  | Ref | 0.061 | -0.14 | -0.19 | -0.34 | -0.07 | -0.63 | -0.23 | 6460  | 5150  | 4860  | 5280  | 5230  | 5500  | 3910  | 5120  | 755.9 | 1509.8 | 2 | 0.0097 | 6.447 |
| Uncharacterized protein (Fragment)<br>OS=Canis familiaris<br>GN=NCL PE=4 SV=1 | tr F1Q0B0 F1Q0B0_CANFA | gFGF<br>VDF<br>NSEE<br>DAK | 95% | 52.4 | 53.05394 | Ref | -0.42 | -0.47 | 0.068 | -0.27 | 0.16  | -0.49 | 0.31  | 44000 | 36100 | 37900 | 61700 | 53800 | 63300 | 42200 | 72700 | 724   | 2169.1 | 3 | 0.0186 | 8.55  |
| Uncharacterized protein (Fragment)<br>OS=Canis familiaris<br>GN=NCL PE=4 SV=1 | tr F1Q0B0 F1Q0B0_CANFA | gFGF<br>VDF<br>NSEE<br>DAK | 84% | 41.2 | 53.12491 | Ref | -0.16 | -0.69 | -0.02 | -0.17 | -0.05 | -0.04 | -0.07 | 13400 | 11200 | 8480  | 15100 | 15000 | 14200 | 14900 | 14600 | 724   | 2169.1 | 3 | 0.0154 | 7.112 |
| Uncharacterized protein (Fragment)<br>OS=Canis familiaris<br>GN=NCL PE=4 SV=1 | tr F1Q0B0 F1Q0B0_CANFA | gFGF<br>VDF<br>NSEE<br>DAK | 95% | 51.6 | 53.01039 | Ref | -0.25 | -0.35 | -0.09 | -0.17 | 0.057 | -0.58 | 0.18  | 4730  | 3800  | 3830  | 5180  | 5400  | 5510  | 3700  | 6220  | 724   | 2169.1 | 3 | 0.0204 | 9.393 |
| Uncharacterized protein (Fragment)<br>OS=Canis familiaris<br>GN=NCL PE=4 SV=1 | tr F1Q0B0 F1Q0B0_CANFA | gFGF<br>VDF<br>NSEE<br>DAK | 83% | 40.8 | 53.18243 | Ref | 0.081 | -0.02 | -0.31 | -0.27 | -0.1  | -0.56 | -0    | 822   | 824   | 832   | 764   | 869   | 854   | 648   | 947   | 724   | 2169.1 | 3 | 0.0145 | 6.684 |

|                                                                               |                        |              |     |      |          |     |       |       |       |        |      |       |       |       |       |       |       |       |       |       |       |     |        |   |        |       |
|-------------------------------------------------------------------------------|------------------------|--------------|-----|------|----------|-----|-------|-------|-------|--------|------|-------|-------|-------|-------|-------|-------|-------|-------|-------|-------|-----|--------|---|--------|-------|
| Uncharacterized protein (Fragment)<br>OS=Canis familiaris<br>GN=NCL PE=4 SV=1 | tr F1Q0B0 F1Q0B0_CANFA | gIAYI<br>EFk | 78% | 36.9 | 52.05183 | Ref | -0.34 | -0.34 | -0.09 | -0.18  | 0.17 | -0.62 | 0.15  | 9030  | 6760  | 7340  | 9750  | 10200 | 11300 | 6790  | 11500 | 775 | 1547.9 | 2 | 0.0245 | 15.82 |
| Uncharacterized protein (Fragment)<br>OS=Canis familiaris<br>GN=NCL PE=4 SV=1 | tr F1Q0B0 F1Q0B0_CANFA | gIAYI<br>EFk | 86% | 39.3 | 51.57717 | Ref | -0.22 | -0.42 | -0.14 | -0.29  | 0.22 | -0.72 | 0.15  | 12200 | 9210  | 8660  | 11800 | 11800 | 14600 | 7930  | 14400 | 775 | 1547.9 | 2 | 0.0138 | 8.885 |
| Uncharacterized protein (Fragment)<br>OS=Canis familiaris<br>GN=NCL PE=4 SV=1 | tr F1Q0B0 F1Q0B0_CANFA | gIAYI<br>EFk | 85% | 38.4 | 51.33446 | Ref | -0.29 | -0.44 | -0.03 | -0.31  | 0.19 | -0.61 | 0.059 | 18600 | 12800 | 12500 | 18600 | 17000 | 20900 | 12500 | 19800 | 775 | 1547.9 | 2 | 0.0089 | 5.735 |
| Uncharacterized protein (Fragment)<br>OS=Canis familiaris<br>GN=NCL PE=4 SV=1 | tr F1Q0B0 F1Q0B0_CANFA | gIAYI<br>EFk | 88% | 42   | 51.39107 | Ref | -0.38 | -0.7  | -0.04 | -0.36  | 0.15 | -0.48 | 0.31  | 26400 | 17400 | 15200 | 26900 | 23700 | 29500 | 20000 | 34200 | 517 | 1547.9 | 3 | 0.0086 | 5.583 |
| Uncharacterized protein (Fragment)<br>OS=Canis familiaris<br>GN=NCL PE=4 SV=1 | tr F1Q0B0 F1Q0B0_CANFA | gIAYI<br>EFk | 89% | 42.1 | 51.11766 | Ref | -0.37 | -0.36 | -0.15 | -0.089 | 0.17 | -0.74 | 0.17  | 19900 | 14000 | 15200 | 19900 | 22800 | 23800 | 13200 | 24700 | 517 | 1547.9 | 3 | 0.0052 | 3.337 |

|                                                                               |                        |                      |     |      |          |     |        |       |       |       |       |       |       |       |       |       |       |       |       |       |       |       |        |   |        |       |
|-------------------------------------------------------------------------------|------------------------|----------------------|-----|------|----------|-----|--------|-------|-------|-------|-------|-------|-------|-------|-------|-------|-------|-------|-------|-------|-------|-------|--------|---|--------|-------|
| Uncharacterized protein (Fragment)<br>OS=Canis familiaris<br>GN=NCL PE=4 SV=1 | tr F1Q0B0 F1Q0B0_CANFA | gIAYI<br>EFk         | 70% | 34.3 | 51.0911  | Ref | -0.27  | -0.59 | 0.1   | -0.36 | 0.17  | -0.5  | -0.02 | 24300 | 16800 | 14600 | 26500 | 21200 | 26800 | 17600 | 24400 | 517   | 1547.9 | 3 | 0.0037 | 2.388 |
| Uncharacterized protein (Fragment)<br>OS=Canis familiaris<br>GN=NCL PE=4 SV=1 | tr F1Q0B0 F1Q0B0_CANFA | gIAYI<br>EFk         | 78% | 36.3 | 51.50898 | Ref | -0.29  | -0.42 | -0.03 | -0.21 | 0.27  | -0.79 | 0.083 | 25200 | 18800 | 18700 | 27400 | 26700 | 32500 | 16200 | 29600 | 775   | 1547.9 | 2 | 0.0118 | 7.633 |
| Uncharacterized protein (Fragment)<br>OS=Canis familiaris<br>GN=NCL PE=4 SV=1 | tr F1Q0B0 F1Q0B0_CANFA | gIAYI<br>EFk         | 88% | 42.1 | 51.43018 | Ref | -0.38  | -0.51 | -0.04 | -0.24 | 0.15  | -0.5  | 0.29  | 43600 | 33400 | 33100 | 51500 | 49200 | 56300 | 37500 | 64300 | 517   | 1547.9 | 3 | 0.0112 | 7.249 |
| Uncharacterized protein (Fragment)<br>OS=Canis familiaris<br>GN=NCL PE=4 SV=1 | tr F1Q0B0 F1Q0B0_CANFA | gIAYI<br>EFk         | 86% | 41   | 52.06551 | Ref | -0.31  | -0.43 | -0.06 | -0.27 | 0.087 | -0.51 | 0.14  | 8730  | 6140  | 6110  | 8890  | 8420  | 9440  | 6530  | 10200 | 517   | 1547.9 | 3 | 0.024  | 15.52 |
| Uncharacterized protein (Fragment)<br>OS=Canis familiaris<br>GN=NCL PE=4 SV=1 | tr F1Q0B0 F1Q0B0_CANFA | gLSE<br>DTTE<br>ETLk | 95% | 60.3 | 53.66912 | Ref | -0.073 | -0.35 | -0.21 | -0.29 | 0.2   | -0.36 | -0.3  | 35800 | 28500 | 25600 | 31600 | 32900 | 40400 | 28600 | 29600 | 644.3 | 1930   | 3 | 0.0158 | 8.18  |

|                                                                               |                        |                   |     |      |          |     |        |       |       |       |       |       |       |       |       |       |       |       |       |       |       |       |        |   |        |       |
|-------------------------------------------------------------------------------|------------------------|-------------------|-----|------|----------|-----|--------|-------|-------|-------|-------|-------|-------|-------|-------|-------|-------|-------|-------|-------|-------|-------|--------|---|--------|-------|
| Uncharacterized protein (Fragment)<br>OS=Canis familiaris<br>GN=NCL PE=4 SV=1 | tr F1Q0B0 F1Q0B0_CANFA | gLSE DTTE ETLK    | 95% | 77.6 | 53.63727 | Ref | -0.27  | -0.28 | 0.007 | -0.37 | 0.18  | -0.87 | -0.39 | 30200 | 16300 | 17500 | 24100 | 20500 | 26200 | 13200 | 18300 | 966   | 1930   | 2 | 0.0127 | 6.562 |
| Uncharacterized protein (Fragment)<br>OS=Canis familiaris<br>GN=NCL PE=4 SV=1 | tr F1Q0B0 F1Q0B0_CANFA | gYAF IEFA SFED AK | 89% | 45.7 | 54.15336 | Ref | -0.18  | -0.4  | -0.01 | -0.38 | -0.05 | -0.52 | 0.33  | 1490  | 1300  | 1210  | 1780  | 1520  | 1670  | 1260  | 2250  | 735.1 | 2202.1 | 3 | 0.0124 | 5.616 |
| Uncharacterized protein (Fragment)<br>OS=Canis familiaris<br>GN=NCL PE=4 SV=1 | tr F1Q0B0 F1Q0B0_CANFA | gYAF IEFA SFED AK | 83% | 41.7 | 54.24183 | Ref | -0.29  | -0.26 | -0.16 | -0.35 | 0.015 | -0.44 | 0.29  | 866   | 681   | 756   | 907   | 875   | 985   | 751   | 1230  | 735.1 | 2202.1 | 3 | 0.0067 | 3.042 |
| Uncharacterized protein (Fragment)<br>OS=Canis familiaris<br>GN=NCL PE=4 SV=1 | tr F1Q0B0 F1Q0B0_CANFA | GyAF IEFA SFED AK | 61% | 35.4 | 54.1572  | Ref | -0.073 | -0.3  | -0.28 | -0.43 | 0.1   | -0.56 | -0.28 | 326   | 207   | 191   | 218   | 217   | 273   | 181   | 217   | 735.1 | 2202.1 | 3 | 0.0129 | 5.874 |
| Uncharacterized protein (Fragment)<br>OS=Canis familiaris<br>GN=NCL PE=4 SV=1 | tr F1Q0B0 F1Q0B0_CANFA | kATT TPAK         | 64% | 30   | 48.26574 | Ref | -0.23  | -0.33 | -0.08 | -0.25 | 0.13  | -0.65 | -0.01 | 42500 | 30100 | 30500 | 40800 | 40000 | 45400 | 27600 | 42700 | 577.4 | 1729.1 | 3 | 0.0039 | 2.243 |

|                                                                               |                        |                             |     |      |          |     |        |       |       |        |       |       |       |       |       |       |       |       |       |       |       |       |        |   |        |       |
|-------------------------------------------------------------------------------|------------------------|-----------------------------|-----|------|----------|-----|--------|-------|-------|--------|-------|-------|-------|-------|-------|-------|-------|-------|-------|-------|-------|-------|--------|---|--------|-------|
| Uncharacterized protein (Fragment)<br>OS=Canis familiaris<br>GN=NCL PE=4 SV=1 | tr F1Q0B0 F1Q0B0_CANFA | kAV<br>VTP<br>Gkk           | 83% | 29   | 42.62855 | Ref | -0.57  | -0.61 | -0.12 | -0.11  | 0.52  | -0.66 | 0.13  | 1090  | 724   | 768   | 1200  | 1340  | 1810  | 832   | 1430  | 1073  | 2143.4 | 2 | 0.0451 | 21.05 |
| Uncharacterized protein (Fragment)<br>OS=Canis familiaris<br>GN=NCL PE=4 SV=1 | tr F1Q0B0 F1Q0B0_CANFA | kFGY<br>VDDE<br>SAED<br>LEK | 80% | 41.5 | 55.29611 | Ref | -0.038 | -0.35 | -0.1  | -0.089 | -0.03 | -0.46 | -0.1  | 3330  | 3010  | 2630  | 3520  | 3900  | 3530  | 2750  | 3500  | 897.1 | 2688.4 | 3 | 0.028  | 10.39 |
| Uncharacterized protein (Fragment)<br>OS=Canis familiaris<br>GN=NCL PE=4 SV=1 | tr F1Q0B0 F1Q0B0_CANFA | kFGY<br>VDDE<br>SAED<br>LEK | 95% | 53.6 | 55.24596 | Ref | -0.4   | -0.52 | -0.03 | -0.39  | 0.38  | -0.67 | 0.13  | 7510  | 4990  | 4990  | 7860  | 6750  | 10000 | 5090  | 8780  | 897.1 | 2688.4 | 3 | 0.0386 | 14.34 |
| Uncharacterized protein (Fragment)<br>OS=Canis familiaris<br>GN=NCL PE=4 SV=1 | tr F1Q0B0 F1Q0B0_CANFA | kVA<br>VATP<br>Akk          | 89% | 27.8 | 36.56865 | Ref | -0.52  | -0.37 | -0.03 | -0.17  | 0.22  | -0.47 | 0.05  | 10700 | 6790  | 8210  | 11600 | 11600 | 13300 | 8630  | 12300 | 743.8 | 2228.5 | 3 | 0.002  | 0.9   |
| Uncharacterized protein (Fragment)<br>OS=Canis familiaris<br>GN=NCL PE=4 SV=1 | tr F1Q0B0 F1Q0B0_CANFA | IELQ<br>GPR                 | 89% | 40.5 | 49.00198 | Ref | -0.19  | -0.18 | -0.27 | -0.49  | 0.44  | -0.42 | -0.07 | 19200 | 17300 | 18800 | 19900 | 18800 | 31300 | 18000 | 22800 | 372.9 | 1115.7 | 3 | 0.0078 | 7.016 |



|                                                                               |                        |                   |     |      |          |     |       |       |       |       |       |       |       |       |       |       |        |        |       |       |        |       |        |   |        |       |
|-------------------------------------------------------------------------------|------------------------|-------------------|-----|------|----------|-----|-------|-------|-------|-------|-------|-------|-------|-------|-------|-------|--------|--------|-------|-------|--------|-------|--------|---|--------|-------|
| Uncharacterized protein (Fragment)<br>OS=Canis familiaris<br>GN=NCL PE=4 SV=1 | tr F1Q0B0 F1Q0B0_CANFA | nDLA<br>VVD<br>VR | 95% | 49.6 | 51.4814  | Ref | -0.16 | -0.36 | 0.01  | -0.33 | 0.06  | -0.58 | 0.063 | 76000 | 60500 | 57000 | 82900  | 72200  | 82600 | 55300 | 85800  | 652.9 | 1303.7 | 2 | 0.0107 | 8.215 |
| Uncharacterized protein (Fragment)<br>OS=Canis familiaris<br>GN=NCL PE=4 SV=1 | tr F1Q0B0 F1Q0B0_CANFA | nDLA<br>VVD<br>VR | 56% | 31.4 | 51.34891 | Ref | -0.05 | -0.32 | -0.22 | -0.26 | 0.081 | -0.64 | 0.024 | 831   | 678   | 611   | 736    | 786    | 869   | 550   | 867    | 653.4 | 1304.7 | 2 | 0.0052 | 4.003 |
| Uncharacterized protein (Fragment)<br>OS=Canis familiaris<br>GN=NCL PE=4 SV=1 | tr F1Q0B0 F1Q0B0_CANFA | qGTE<br>IDGR      | 85% | 37.5 | 50.25781 | Ref | -0.27 | -0.23 | -0.07 | -0.35 | 0.12  | -0.69 | 0.085 | 29900 | 21200 | 23600 | 29700  | 26800  | 32600 | 19300 | 32900  | 590.3 | 1178.6 | 2 | 0.0119 | 10.12 |
| Uncharacterized protein (Fragment)<br>OS=Canis familiaris<br>GN=NCL PE=4 SV=1 | tr F1Q0B0 F1Q0B0_CANFA | qGTE<br>IDGR      | 87% | 40.1 | 50.2037  | Ref | -0.33 | -0.46 | 0.016 | -0.39 | 0.25  | -0.5  | -0.03 | 17800 | 11900 | 11800 | 18400  | 15300  | 20800 | 12900 | 17800  | 393.9 | 1178.6 | 3 | 0.0096 | 8.117 |
| Uncharacterized protein (Fragment)<br>OS=Canis familiaris<br>GN=NCL PE=4 SV=1 | tr F1Q0B0 F1Q0B0_CANFA | qGTE<br>IDGR      | 85% | 37.4 | 50.25122 | Ref | -0.1  | -0.5  | -0.02 | -0.29 | 0.16  | -0.61 | 0.017 | 1E+05 | 98300 | 81300 | 127000 | 116000 | 1E+05 | 84700 | 130000 | 590.3 | 1178.6 | 2 | 0.0094 | 7.951 |

|                                                                               |                        |                    |     |      |          |     |       |       |       |       |       |       |       |       |       |       |       |       |       |       |       |       |        |   |        |       |
|-------------------------------------------------------------------------------|------------------------|--------------------|-----|------|----------|-----|-------|-------|-------|-------|-------|-------|-------|-------|-------|-------|-------|-------|-------|-------|-------|-------|--------|---|--------|-------|
| Uncharacterized protein (Fragment)<br>OS=Canis familiaris<br>GN=NCL PE=4 SV=1 | tr F1Q0B0 F1Q0B0_CANFA | sISLY<br>YTGE<br>k | 85% | 40.5 | 53.20352 | Ref | -0.24 | -0.15 | -0.08 | -0.25 | 0.045 | -0.47 | -0.06 | 12900 | 9840  | 11400 | 13500 | 13200 | 14100 | 10300 | 13500 | 885   | 1768   | 2 | 0.0141 | 7.993 |
| Uncharacterized protein (Fragment)<br>OS=Canis familiaris<br>GN=NCL PE=4 SV=1 | tr F1Q0B0 F1Q0B0_CANFA | sISLY<br>YTGE<br>k | 93% | 45.6 | 53.18364 | Ref | -0.2  | -0.28 | -0.07 | -0.32 | 0.12  | -0.66 | 0.071 | 20400 | 15500 | 16000 | 20700 | 19200 | 22800 | 13900 | 22800 | 885   | 1768   | 2 | 0.0133 | 7.507 |
| Uncharacterized protein (Fragment)<br>OS=Canis familiaris<br>GN=NCL PE=4 SV=1 | tr F1Q0B0 F1Q0B0_CANFA | sISLY<br>YTGE<br>k | 95% | 49.6 | 53.18257 | Ref | -0.31 | -0.42 | 0.002 | -0.25 | 0.17  | -0.58 | -0.01 | 11000 | 7450  | 7490  | 11300 | 10400 | 12200 | 7580  | 11200 | 885   | 1768   | 2 | 0.0193 | 10.89 |
| Uncharacterized protein (Fragment)<br>OS=Canis familiaris<br>GN=NCL PE=4 SV=1 | tr F1Q0B0 F1Q0B0_CANFA | tGIS<br>DLFA<br>k  | 93% | 44.5 | 52.08917 | Ref | -0.31 | -0.41 | -0.01 | -0.22 | 0.12  | -0.66 | 0.055 | 27800 | 18900 | 19000 | 28200 | 26900 | 29700 | 18100 | 29400 | 780.5 | 1558.9 | 2 | 0.0133 | 8.51  |
| Uncharacterized protein (Fragment)<br>OS=Canis familiaris<br>GN=NCL PE=4 SV=1 | tr F1Q0B0 F1Q0B0_CANFA | tGIS<br>DLFA<br>k  | 76% | 37.1 | 52.17687 | Ref | -0.33 | -0.5  | 0.044 | -0.22 | -0.03 | -0.5  | 0.32  | 17900 | 14000 | 13500 | 22200 | 20400 | 20300 | 15300 | 26900 | 520.6 | 1558.9 | 3 | 0.0108 | 6.911 |

|                                                                               |                        |            |     |      |          |     |       |       |       |       |       |       |       |       |       |       |       |       |       |       |       |       |        |   |        |       |
|-------------------------------------------------------------------------------|------------------------|------------|-----|------|----------|-----|-------|-------|-------|-------|-------|-------|-------|-------|-------|-------|-------|-------|-------|-------|-------|-------|--------|---|--------|-------|
| Uncharacterized protein (Fragment)<br>OS=Canis familiaris<br>GN=NCL PE=4 SV=1 | tr F1Q0B0 F1Q0B0_CANFA | tGIS DLFAk | 75% | 36.4 | 51.92891 | Ref | -0.11 | -0.59 | -0.13 | -0.37 | -0.01 | -0.59 | 0.32  | 15300 | 12000 | 9350  | 14400 | 13400 | 15100 | 10500 | 19600 | 520.6 | 1558.9 | 3 | 0.0038 | 2.449 |
| Uncharacterized protein (Fragment)<br>OS=Canis familiaris<br>GN=NCL PE=4 SV=1 | tr F1Q0B0 F1Q0B0_CANFA | tGIS DLFAk | 76% | 37   | 52.08917 | Ref | -0.19 | -0.57 | 0.029 | -0.39 | 0.079 | -0.58 | 0.32  | 25800 | 21700 | 18100 | 30800 | 25400 | 30600 | 20300 | 37500 | 520.6 | 1558.9 | 3 | 0.0134 | 8.565 |
| Uncharacterized protein (Fragment)<br>OS=Canis familiaris<br>GN=NCL PE=4 SV=1 | tr F1Q0B0 F1Q0B0_CANFA | vAV ATP Ak | 78% | 32.8 | 47.23291 | Ref | -0.61 | -0.34 | 0.099 | -0.25 | 0.22  | -0.7  | 0.006 | 58800 | 31100 | 40900 | 62100 | 53600 | 64900 | 35800 | 58100 | 455.6 | 1363.8 | 3 | 0.0173 | 12.69 |
| Uncharacterized protein (Fragment)<br>OS=Canis familiaris<br>GN=NCL PE=4 SV=1 | tr F1Q0B0 F1Q0B0_CANFA | vAV ATP Ak | 89% | 36.5 | 46.99768 | Ref | -0.2  | -0.31 | -0.15 | -0.23 | 0.15  | -0.68 | -0.02 | 92100 | 65900 | 66100 | 83200 | 86300 | 98600 | 57700 | 90500 | 682.9 | 1363.9 | 2 | 0.0103 | 7.583 |
| Uncharacterized protein (Fragment)<br>OS=Canis familiaris<br>GN=NCL PE=4 SV=1 | tr F1Q0B0 F1Q0B0_CANFA | vAV ATP Ak | 87% | 34.8 | 46.57448 | Ref | -0.12 | -0.24 | -0.14 | -0.22 | 0.1   | -0.52 | -0.05 | 21500 | 18300 | 18400 | 22200 | 23000 | 25200 | 17100 | 23600 | 682.9 | 1363.9 | 2 | 0.0037 | 2.748 |

|                                                                               |                        |                  |     |      |          |     |        |       |       |       |       |       |       |       |       |       |       |       |       |       |       |       |        |   |        |       |
|-------------------------------------------------------------------------------|------------------------|------------------|-----|------|----------|-----|--------|-------|-------|-------|-------|-------|-------|-------|-------|-------|-------|-------|-------|-------|-------|-------|--------|---|--------|-------|
| Uncharacterized protein (Fragment)<br>OS=Canis familiaris<br>GN=NCL PE=4 SV=1 | tr F1Q0B0 F1Q0B0_CANFA | vFG<br>NEIk      | 72% | 34.4 | 51.2034  | Ref | -0.067 | -0.37 | -0.06 | -0.29 | -0    | -0.24 | -0.09 | 19200 | 17300 | 15200 | 21100 | 19900 | 21200 | 18700 | 20600 | 707.9 | 1413.8 | 2 | 0.024  | 16.98 |
| Uncharacterized protein (Fragment)<br>OS=Canis familiaris<br>GN=NCL PE=4 SV=1 | tr F1Q0B0 F1Q0B0_CANFA | vFG<br>NEIk      | 83% | 36.8 | 50.52663 | Ref | -0.059 | -0.33 | -0.07 | -0.17 | -0.1  | -0.36 | -0.15 | 21000 | 17500 | 15700 | 21200 | 21600 | 19900 | 17300 | 19800 | 707.9 | 1413.8 | 2 | 0.0064 | 4.552 |
| Uncharacterized protein (Fragment)<br>OS=Canis familiaris<br>GN=NCL PE=4 SV=1 | tr F1Q0B0 F1Q0B0_CANFA | vPQ<br>NQn<br>Gk | 79% | 37.3 | 52.38212 | Ref | -0.12  | -0.27 | -0.04 | -0.34 | -0.03 | -0.88 | 0.024 | 28100 | 19200 | 18800 | 24700 | 22100 | 23900 | 13900 | 25800 | 747.4 | 1492.8 | 2 | 0.0123 | 8.241 |
| Uncharacterized protein (Fragment)<br>OS=Canis familiaris<br>GN=NCL PE=4 SV=1 | tr F1Q0B0 F1Q0B0_CANFA | vPQn<br>QnG<br>k | 84% | 39.2 | 52.3522  | Ref | -0.15  | 0.014 | -0.16 | -0.35 | 0.078 | -0.83 | -0.06 | 12600 | 9400  | 11500 | 11400 | 11000 | 12900 | 7220  | 12200 | 747.9 | 1493.8 | 2 | 0.0193 | 12.88 |
| Uncharacterized protein (Fragment)<br>OS=Canis familiaris<br>GN=NCL PE=4 SV=1 | tr F1Q0B0 F1Q0B0_CANFA | vPQn<br>QnG<br>k | 83% | 38.5 | 52.23078 | Ref | -0.13  | -0.1  | -0.06 | -0.35 | 0.14  | -0.89 | -0.23 | 31900 | 22400 | 24800 | 28700 | 25900 | 31700 | 16200 | 25500 | 747.9 | 1493.8 | 2 | 0.0084 | 5.619 |

|                                                                               |                        |                                   |     |      |          |     |       |       |       |       |      |       |       |      |      |      |      |      |      |      |      |       |        |   |        |       |
|-------------------------------------------------------------------------------|------------------------|-----------------------------------|-----|------|----------|-----|-------|-------|-------|-------|------|-------|-------|------|------|------|------|------|------|------|------|-------|--------|---|--------|-------|
| Uncharacterized protein (Fragment)<br>OS=Canis familiaris<br>GN=NCL PE=4 SV=1 | tr F1Q0B0 F1Q0B0_CANFA | vTQ<br>DELK<br>EVFE<br>DAV<br>EIR | 73% | 39   | 54.98573 | Ref | -0.27 | -0.49 | -0.05 | -0.17 | 0.11 | -0.6  | 0.16  | 3330 | 2510 | 2330 | 3560 | 3600 | 3820 | 2430 | 4110 | 876.8 | 2627.4 | 3 | 0.0359 | 13.67 |
| Uncharacterized protein (Fragment)<br>OS=Canis familiaris<br>GN=NCL PE=4 SV=1 | tr F1Q0B0 F1Q0B0_CANFA | vTQ<br>DELK<br>EVFE<br>DAV<br>EIR | 68% | 37.6 | 54.85085 | Ref | -0.31 | -0.36 | -0.03 | -0.27 | 0.27 | -0.66 | 0.076 | 1340 | 1020 | 1060 | 1500 | 1400 | 1770 | 972  | 1610 | 876.8 | 2627.4 | 3 | 0.0211 | 8.025 |
| Uncharacterized protein (Fragment)<br>OS=Canis familiaris<br>GN=NCL PE=4 SV=1 | tr F1Q0B0 F1Q0B0_CANFA | vTQ<br>DELK<br>EVFE<br>DAV<br>EIR | 52% | 34.5 | 54.82848 | Ref | -0.36 | -0.34 | -0.2  | -0.24 | 0.28 | -0.81 | 0.16  | 3130 | 2080 | 2280 | 2820 | 3030 | 3790 | 1860 | 3610 | 876.8 | 2627.4 | 3 | 0.0147 | 5.593 |
| Uncharacterized protein (Fragment)<br>OS=Canis familiaris<br>GN=NCL PE=4 SV=1 | tr F1Q0B0 F1Q0B0_CANFA | vTQ<br>DELK<br>EVFE<br>DAV<br>EIR | 72% | 38.6 | 54.82848 | Ref | -0.21 | -0.49 | -0.01 | -0.27 | 0.25 | -0.66 | 0.15  | 1280 | 1090 | 976  | 1520 | 1400 | 1750 | 973  | 1690 | 876.8 | 2627.4 | 3 | 0.0147 | 5.593 |
| Uncharacterized protein (Fragment)<br>OS=Canis familiaris<br>GN=NCL PE=4 SV=1 | tr F1Q0B0 F1Q0B0_CANFA | vTQ<br>DELK<br>EVFE<br>DAV<br>EIR | 56% | 35.1 | 54.83219 | Ref | -0.32 | -0.53 | -0.03 | -0.18 | 0.19 | -0.57 | 0.2   | 1020 | 804  | 754  | 1190 | 1190 | 1340 | 829  | 1400 | 876.8 | 2627.4 | 3 | 0.014  | 5.308 |

|                                                                            |                       |                                    |     |      |          |     |        |       |       |        |       |       |       |       |       |       |       |       |       |       |       |       |        |   |        |       |
|----------------------------------------------------------------------------|-----------------------|------------------------------------|-----|------|----------|-----|--------|-------|-------|--------|-------|-------|-------|-------|-------|-------|-------|-------|-------|-------|-------|-------|--------|---|--------|-------|
| 78 kDa glucose-regulated protein<br>OS=Bos taurus<br>GN=HSPA5 PE=2<br>SV=1 | sp Q0VCX2 GRP78_BOVIN | aLSS<br>QHQA<br>AR                 | 80% | 37.4 | 51.08254 | Ref | -0.019 | 0.15  | -0.07 | -0.21  | 0.1   | 0.048 | 0.25  | 14100 | 16000 | 19500 | 18900 | 18800 | 20500 | 20600 | 23500 | 434.6 | 1300.7 | 3 | 0.0093 | 7.115 |
| 78 kDa glucose-regulated protein<br>OS=Bos taurus<br>GN=HSPA5 PE=2<br>SV=1 | sp Q0VCX2 GRP78_BOVIN | dAG<br>TIAG<br>LNV<br>MR           | 95% | 51.8 | 52.56306 | Ref | 0.11   | 0.044 | 0.16  | -0.042 | -0.34 | 0.18  | -0.16 | 64200 | 63800 | 66100 | 80500 | 77100 | 54800 | 81800 | 64200 | 761.4 | 1520.8 | 2 | 0.006  | 3.917 |
| 78 kDa glucose-regulated protein<br>OS=Bos taurus<br>GN=HSPA5 PE=2<br>SV=1 | sp Q0VCX2 GRP78_BOVIN | dNH<br>LLGT<br>FDLT<br>GIPP<br>APR | 95% | 63.3 | 54.68609 | Ref | 0.23   | -0.02 | -0.11 | -0.075 | 0.035 | -0.1  | 0.027 | 4150  | 4480  | 4080  | 4310  | 4860  | 4580  | 4360  | 4720  | 746.7 | 2237.2 | 3 | 0.0207 | 9.238 |
| 78 kDa glucose-regulated protein<br>OS=Bos taurus<br>GN=HSPA5 PE=2<br>SV=1 | sp Q0VCX2 GRP78_BOVIN | dNH<br>LLGT<br>FDLT<br>GIPP<br>APR | 95% | 86.6 | 54.61059 | Ref | 0.2    | -0.18 | 0.039 | -0.14  | -0.2  | -0.01 | 0.29  | 6130  | 6770  | 5650  | 7360  | 7180  | 6020  | 7130  | 8710  | 746.7 | 2237.2 | 3 | #####  | 0.163 |
| 78 kDa glucose-regulated protein<br>OS=Bos taurus<br>GN=HSPA5 PE=2<br>SV=1 | sp Q0VCX2 GRP78_BOVIN | dNH<br>LLGT<br>FDLT<br>GIPP<br>APR | 95% | 104  | 54.68686 | Ref | 0.23   | 0.17  | -0.08 | -0.15  | -0.17 | -0.12 | 0.071 | 3010  | 3190  | 3310  | 3130  | 3290  | 2830  | 3060  | 3470  | 746.7 | 2237.2 | 3 | 0.0205 | 9.157 |
| 78 kDa glucose-regulated protein<br>OS=Bos taurus<br>GN=HSPA5 PE=2<br>SV=1 | sp Q0VCX2 GRP78_BOVIN | dNH<br>LLGT<br>FDLT<br>GIPP<br>APR | 94% | 51.7 | 54.68027 | Ref | 0.17   | 0.22  | -0.28 | 0.094  | -0.28 | 0.3   | -0.34 | 2260  | 2370  | 2660  | 2110  | 3010  | 2030  | 3170  | 2010  | 746.7 | 2237.2 | 3 | 0.0159 | 7.106 |

|                                                                            |                       |                              |     |      |          |     |       |       |       |        |       |       |       |       |       |       |       |       |       |       |       |       |        |   |        |       |
|----------------------------------------------------------------------------|-----------------------|------------------------------|-----|------|----------|-----|-------|-------|-------|--------|-------|-------|-------|-------|-------|-------|-------|-------|-------|-------|-------|-------|--------|---|--------|-------|
| 78 kDa glucose-regulated protein<br>OS=Bos taurus<br>GN=HSPA5 PE=2<br>SV=1 | sp Q0VCX2 GRP78_BOVIN | eLEEI<br>VQPI<br>Isk         | 95% | 51.7 | 51.28173 | Ref | 0.19  | 0.25  | -0.3  | -0.17  | -0.05 | 0.055 | -0.29 | 6590  | 5900  | 6670  | 5130  | 6190  | 5870  | 6580  | 5130  | 669.4 | 2005.2 | 3 | 0.0062 | 3.096 |
| 78 kDa glucose-regulated protein<br>OS=Bos taurus<br>GN=HSPA5 PE=2<br>SV=1 | sp Q0VCX2 GRP78_BOVIN | eTAE<br>AYLG<br>k            | 74% | 37   | 52.5507  | Ref | 0.24  | 0.21  | -0.01 | -0.22  | -0.17 | -0.14 | -0.52 | 12200 | 9830  | 10400 | 10100 | 9610  | 8680  | 9270  | 7040  | 530.6 | 1588.9 | 3 | 0.0076 | 4.788 |
| 78 kDa glucose-regulated protein<br>OS=Bos taurus<br>GN=HSPA5 PE=2<br>SV=1 | sp Q0VCX2 GRP78_BOVIN | fEEL<br>NMD<br>LFR           | 73% | 34.7 | 51.47444 | Ref | 0.089 | 0.1   | 0.13  | -0.19  | -0.32 | 0.029 | -0.14 | 6100  | 5020  | 5500  | 6300  | 5540  | 4430  | 5890  | 5210  | 809.4 | 1616.8 | 2 | 0.0068 | 4.209 |
| 78 kDa glucose-regulated protein<br>OS=Bos taurus<br>GN=HSPA5 PE=2<br>SV=1 | sp Q0VCX2 GRP78_BOVIN | iINEP<br>TAA<br>AIAY<br>GLDk | 95% | 63.9 | 53.34247 | Ref | 0.29  | 0.44  | -0.2  | -0.25  | -0.12 | -0.13 | -0.19 | 12300 | 13600 | 16300 | 11800 | 12500 | 12000 | 12400 | 11900 | 756.8 | 2267.3 | 3 | 0.0176 | 7.772 |
| 78 kDa glucose-regulated protein<br>OS=Bos taurus<br>GN=HSPA5 PE=2<br>SV=1 | sp Q0VCX2 GRP78_BOVIN | iINEP<br>TAA<br>AIAY<br>GLDk | 95% | 62.5 | 53.3085  | Ref | 0.42  | -0.14 | -0.12 | -0.071 | 0.22  | -0.19 | -0.4  | 12400 | 13800 | 10200 | 11600 | 13200 | 14100 | 11100 | 9520  | 756.8 | 2267.3 | 3 | 0.0167 | 7.362 |
| 78 kDa glucose-regulated protein<br>OS=Bos taurus<br>GN=HSPA5 PE=2<br>SV=1 | sp Q0VCX2 GRP78_BOVIN | iINEP<br>TAA<br>AIAY<br>GLDk | 95% | 52.9 | 53.3485  | Ref | 0.26  | -0.46 | 0.2   | 0.007  | -0.2  | 0.11  | -0.23 | 2500  | 2420  | 1590  | 2830  | 2720  | 2060  | 2660  | 2100  | 756.8 | 2267.3 | 3 | 0.018  | 7.93  |

|                                                                            |                       |                              |     |      |          |     |        |       |       |        |       |       |       |       |       |       |       |       |       |       |       |       |        |   |        |       |
|----------------------------------------------------------------------------|-----------------------|------------------------------|-----|------|----------|-----|--------|-------|-------|--------|-------|-------|-------|-------|-------|-------|-------|-------|-------|-------|-------|-------|--------|---|--------|-------|
| 78 kDa glucose-regulated protein<br>OS=Bos taurus<br>GN=HSPA5 PE=2<br>SV=1 | sp Q0VCX2 GRP78_BOVIN | iINEP<br>TAA<br>AIAY<br>GLDk | 59% | 31.1 | 52.16232 | Ref | 0.06   | -0.03 | 0.099 | -0.29  | -0.02 | -0.09 | -0.27 | 6590  | 4590  | 4680  | 5740  | 4820  | 5080  | 5050  | 4430  | 643.9 | 2571.5 | 4 | 0.0218 | 8.492 |
| 78 kDa glucose-regulated protein<br>OS=Bos taurus<br>GN=HSPA5 PE=2<br>SV=1 | sp Q0VCX2 GRP78_BOVIN | iINEP<br>TAA<br>AIAY<br>GLDk | 95% | 64.5 | 53.08693 | Ref | -0.083 | 0.053 | 0.074 | -0.087 | -0.25 | 0.15  | 0.15  | 4520  | 4010  | 4790  | 5450  | 5370  | 4180  | 5790  | 5750  | 808.8 | 2423.4 | 3 | 0.0226 | 9.315 |
| 78 kDa glucose-regulated protein<br>OS=Bos taurus<br>GN=HSPA5 PE=2<br>SV=1 | sp Q0VCX2 GRP78_BOVIN | iINEP<br>TAA<br>AIAY<br>GLDk | 95% | 62.7 | 52.90123 | Ref | 0.21   | 0.044 | 0.16  | -0.17  | -0.3  | 0.23  | -0.07 | 25300 | 30900 | 29800 | 36200 | 31700 | 25400 | 38300 | 30800 | 808.8 | 2423.4 | 3 | 0.0178 | 7.347 |
| 78 kDa glucose-regulated protein<br>OS=Bos taurus<br>GN=HSPA5 PE=2<br>SV=1 | sp Q0VCX2 GRP78_BOVIN | iINEP<br>TAA<br>AIAY<br>GLDk | 95% | 56.4 | 52.57669 | Ref | 0.2    | -0.14 | 0.09  | -0.066 | -0.33 | 0.3   | -0.01 | 1030  | 1180  | 1010  | 1330  | 1320  | 960   | 1540  | 1240  | 808.8 | 2423.4 | 3 | 0.0097 | 4.018 |
| 78 kDa glucose-regulated protein<br>OS=Bos taurus<br>GN=HSPA5 PE=2<br>SV=1 | sp Q0VCX2 GRP78_BOVIN | iINEP<br>TAA<br>AIAY<br>GLDk | 85% | 37.8 | 51.276   | Ref | -0.094 | -0.15 | 0.2   | -0.043 | -0.19 | 0.22  | -0.05 | 5210  | 4250  | 4440  | 6340  | 5910  | 4650  | 6460  | 5340  | 682.9 | 2727.6 | 4 | 0.0177 | 6.494 |
| 78 kDa glucose-regulated protein<br>OS=Bos taurus<br>GN=HSPA5 PE=2<br>SV=1 | sp Q0VCX2 GRP78_BOVIN | iINEP<br>TAA<br>AIAY<br>GLDk | 78% | 35.4 | 51.97898 | Ref | 0.096  | -0.07 | 0.092 | -0.034 | -0.24 | 0.23  | -0.02 | 4250  | 4420  | 4270  | 5370  | 5420  | 4110  | 5940  | 4940  | 682.9 | 2727.6 | 4 | 0.0333 | 12.21 |



|                                                                            |                       |                            |     |      |          |     |                    |                      |                               |                        |                         |                        |                         |                         |                          |                         |                                |                        |                         |                         |                        |       |        |   |        |       |
|----------------------------------------------------------------------------|-----------------------|----------------------------|-----|------|----------|-----|--------------------|----------------------|-------------------------------|------------------------|-------------------------|------------------------|-------------------------|-------------------------|--------------------------|-------------------------|--------------------------------|------------------------|-------------------------|-------------------------|------------------------|-------|--------|---|--------|-------|
| 78 kDa glucose-regulated protein<br>OS=Bos taurus<br>GN=HSPA5 PE=2<br>SV=1 | sp Q0VCX2 GRP78_BOVIN | iQQL<br>Vk                 | 64% | 27.4 | 45.90708 | Ref | 0.074              | -0.15                | 0.17                          | -0.11                  | -0.16                   | 0.17                   | -0.12                   | 36400                   | 32800                    | 30300                   | 42500                          | 38700                  | 32700                   | 42900                   | 34900                  | 668.9 | 1335.9 | 2 | 0.0039 | 2.902 |
| 78 kDa glucose-regulated protein<br>OS=Bos taurus<br>GN=HSPA5 PE=2<br>SV=1 | sp Q0VCX2 GRP78_BOVIN | iQQL<br>Vk                 | 69% | 27.4 | 44.90647 | Ref | 0.037              | -0.05                | 0.12                          | -0.06                  | -0.07                   | 0.065                  | -0.06                   | 14900                   | 13800                    | 14200                   | 17900                          | 17400                  | 15100                   | 17300                   | 15700                  | 668.9 | 1335.9 | 2 | #####  | 0.254 |
| 78 kDa glucose-regulated protein<br>OS=Bos taurus<br>GN=HSPA5 PE=2<br>SV=1 | sp Q0VCX2 GRP78_BOVIN | iTITn<br>DQNR              | 82% | 37.5 | 51.53437 | Ref | 0.12               | 0.09                 | 0.09                          | -0.06                  | -0.13                   | -0.04                  | -0.15                   | 68100                   | 64100                    | 68400                   | 76700                          | 76300                  | 63500                   | 70400                   | 65000                  | 690.4 | 1378.7 | 2 | 0.0107 | 7.774 |
| 78 kDa glucose-regulated protein<br>OS=Bos taurus<br>GN=HSPA5 PE=2<br>SV=1 | sp Q0VCX2 GRP78_BOVIN | iTPS<br>YVAF<br>TPEG<br>ER | 95% | 56.4 | 53.13321 | Ref | 0.099              | 0.013                | 0.033                         | -0.068                 | -0.12                   | 0.056                  | -0.02                   | 5480                    | 5330                     | 5450                    | 6200                           | 6370                   | 5360                    | 6340                    | 5980                   | 936   | 1870   | 2 | 0.0236 | 12.64 |
| 78 kDa glucose-regulated protein<br>OS=Bos taurus<br>GN=HSPA5 PE=2<br>SV=1 | sp Q0VCX2 GRP78_BOVIN | iTPS<br>YVAF<br>TPEG<br>ER | 95% | 60   | 53.22157 | Ref | 0.06               | 0.13                 | 0.12                          | -0.1                   | -0.08                   | 0.074                  | -0.21                   | 28900                   | 27900                    | 31800                   | 35500                          | 33400                  | 29700                   | 34500                   | 28000                  | 936   | 1870   | 2 | 0.0158 | 8.471 |
| 78 kDa glucose-regulated protein<br>OS=Bos taurus<br>GN=HSPA5 PE=2<br>SV=1 | sp Q0VCX2 GRP78_BOVIN | iTPS<br>YVAF<br>TPEG<br>ER | 95% | 60   | 53.21012 | Ref | No Values (0.0086) | No Values (-0.08942) | Reference Missing (0.9241865) | No Values (-0.4161635) | No Values (-0.22029106) | No Values (-0.2830578) | No Values (-0.27210838) | No Values (-0.19378622) | No Values (-0.008603867) | No Values (-0.10908942) | Reference Missing (0.92418655) | No Values (-0.4161635) | No Values (-0.22029106) | No Values (-0.28305788) | No Values (-0.2721838) | 624.3 | 1870   | 3 | 0.0154 | 8.239 |

|                                                                            |                       |                            |     |      |          |     |        |       |       |        |       |       |       |      |      |      |      |      |      |      |      |       |        |   |        |       |
|----------------------------------------------------------------------------|-----------------------|----------------------------|-----|------|----------|-----|--------|-------|-------|--------|-------|-------|-------|------|------|------|------|------|------|------|------|-------|--------|---|--------|-------|
| 78 kDa glucose-regulated protein<br>OS=Bos taurus<br>GN=HSPA5 PE=2<br>SV=1 | sp Q0VCX2 GRP78_BOVIN | iTPS<br>YVAF<br>TPEG<br>ER | 95% | 60.1 | 53.29902 | Ref | 0.0024 | -0.13 | 0.02  | -0.073 | -0.06 | 0.16  | -0.01 | 8450 | 7280 | 7230 | 8970 | 9270 | 8140 | 9950 | 8780 | 936   | 1870   | 2 | 0.0133 | 7.103 |
| 78 kDa glucose-regulated protein<br>OS=Bos taurus<br>GN=HSPA5 PE=2<br>SV=1 | sp Q0VCX2 GRP78_BOVIN | iTPS<br>YVAF<br>TPEG<br>ER | 95% | 59.5 | 53.31539 | Ref | 0.0031 | -0.04 | 0.005 | -0.031 | -0.16 | 0.17  | -0.06 | 6770 | 5740 | 6040 | 6990 | 7520 | 6010 | 7880 | 6650 | 936   | 1870   | 2 | 0.0122 | 6.515 |
| 78 kDa glucose-regulated protein<br>OS=Bos taurus<br>GN=HSPA5 PE=2<br>SV=1 | sp Q0VCX2 GRP78_BOVIN | iTPS<br>YVAF<br>TPEG<br>ER | 87% | 41.5 | 53.25692 | Ref | 0.1    | 0.12  | 0.13  | -0.069 | -0.16 | -0.04 | 0.039 | 2800 | 3010 | 3300 | 3730 | 3590 | 2940 | 3330 | 3500 | 936   | 1870   | 2 | 0.0107 | 5.724 |
| 78 kDa glucose-regulated protein<br>OS=Bos taurus<br>GN=HSPA5 PE=2<br>SV=1 | sp Q0VCX2 GRP78_BOVIN | kELE<br>EIVQ<br>PIISk      | 83% | 33.7 | 48.24906 | Ref | -0.042 | -0.08 | -0.11 | -0.043 | 0.086 | -0.17 | 0.002 | 4160 | 2930 | 3110 | 3400 | 3940 | 3760 | 3280 | 3670 | 610.4 | 2437.5 | 4 | 0.0177 | 7.255 |
| 78 kDa glucose-regulated protein<br>OS=Bos taurus<br>GN=HSPA5 PE=2<br>SV=1 | sp Q0VCX2 GRP78_BOVIN | kkEL<br>EEIV<br>QPII<br>Sk | 77% | 28.1 | 43.09098 | Ref | -0.48  | -0.07 | 0.11  | 0.14   | 0.069 | 0.12  | 0.081 | 1160 | 787  | 1140 | 1450 | 1630 | 1350 | 1460 | 1410 | 957.6 | 2869.8 | 3 | 0.0223 | 7.76  |
| 78 kDa glucose-regulated protein<br>OS=Bos taurus<br>GN=HSPA5 PE=2<br>SV=1 | sp Q0VCX2 GRP78_BOVIN | kkEL<br>EEIV<br>QPII<br>Sk | 83% | 28.5 | 43.06897 | Ref | -0.16  | -0.18 | 0.12  | -0.005 | 0.085 | 0.067 | 0.06  | 6720 | 5520 | 5880 | 8140 | 8230 | 7650 | 7890 | 7790 | 718.5 | 2869.8 | 4 | 0.0211 | 7.352 |

|                                                                            |                       |                                        |     |      |          |     |       |       |       |        |       |       |       |       |       |       |        |        |       |       |       |       |        |   |        |       |
|----------------------------------------------------------------------------|-----------------------|----------------------------------------|-----|------|----------|-----|-------|-------|-------|--------|-------|-------|-------|-------|-------|-------|--------|--------|-------|-------|-------|-------|--------|---|--------|-------|
| 78 kDa glucose-regulated protein<br>OS=Bos taurus<br>GN=HSPA5 PE=2<br>SV=1 | sp Q0VCX2 GRP78_BOVIN | kSDI<br>DEIV<br>LVG<br>GSTR            | 87% | 43.4 | 53.41625 | Ref | 0.12  | -0.09 | 0.11  | -0.086 | -0.14 | 0.058 | -0.09 | 14400 | 13200 | 12400 | 16000  | 15400  | 12900 | 15500 | 14000 | 733.1 | 2196.2 | 3 | 0.0162 | 7.383 |
| 78 kDa glucose-regulated protein<br>OS=Bos taurus<br>GN=HSPA5 PE=2<br>SV=1 | sp Q0VCX2 GRP78_BOVIN | kSDI<br>DEIV<br>LVG<br>GSTR            | 94% | 51.7 | 53.45446 | Ref | 0.22  | -0.1  | 0.098 | -0.004 | -0.2  | 0.063 | -0.01 | 80600 | 91000 | 79100 | 102000 | 105000 | 80000 | 1E+05 | 94400 | 733.1 | 2196.2 | 3 | 0.0182 | 8.298 |
| 78 kDa glucose-regulated protein<br>OS=Bos taurus<br>GN=HSPA5 PE=2<br>SV=1 | sp Q0VCX2 GRP78_BOVIN | kSDI<br>DEIV<br>LVG<br>GSTR            | 95% | 57.6 | 53.45656 | Ref | 0.13  | -0.17 | 0.092 | -0.1   | -0.27 | 0.22  | -0.03 | 32900 | 31200 | 27300 | 36900  | 35600  | 27600 | 40500 | 33900 | 733.1 | 2196.2 | 3 | 0.0177 | 8.052 |
| 78 kDa glucose-regulated protein<br>OS=Bos taurus<br>GN=HSPA5 PE=2<br>SV=1 | sp Q0VCX2 GRP78_BOVIN | kSQI<br>FSTA<br>SDN<br>QPT<br>VTIK     | 95% | 50.1 | 53.56833 | Ref | -0.28 | -0.17 | 0.27  | 0.07   | -0.07 | -0    | -0.09 | 8710  | 5650  | 6640  | 10100  | 9690   | 7680  | 8390  | 7880  | 720.2 | 2876.6 | 4 | 0.025  | 8.699 |
| 78 kDa glucose-regulated protein<br>OS=Bos taurus<br>GN=HSPA5 PE=2<br>SV=1 | sp Q0VCX2 GRP78_BOVIN | kTkP<br>YIQV<br>DVG<br>GGQ<br>Tk       | 80% | 35   | 50.56265 | Ref | 0.06  | 0.11  | 0.054 | -0.15  | -0.13 | 0.25  | -0.16 | 7830  | 7910  | 8910  | 9590   | 9160   | 8150  | 11100 | 8260  | 734.7 | 2934.7 | 4 | 0.0448 | 15.26 |
| 78 kDa glucose-regulated protein<br>OS=Bos taurus<br>GN=HSPA5 PE=2<br>SV=1 | sp Q0VCX2 GRP78_BOVIN | kVTH<br>AVV<br>TVPA<br>YFN<br>DAQ<br>R | 85% | 42.6 | 54.20858 | Ref | 0.18  | -0.18 | 0.06  | -0.067 | -0.03 | 0.18  | -0.09 | 820   | 901   | 764   | 1010   | 1020   | 919   | 1110  | 912   | 875.5 | 2623.5 | 3 | 0.0187 | 7.107 |

|                                                                            |                       |                                        |     |      |          |     |        |       |       |        |       |       |       |       |       |       |       |       |       |       |       |       |        |   |        |       |
|----------------------------------------------------------------------------|-----------------------|----------------------------------------|-----|------|----------|-----|--------|-------|-------|--------|-------|-------|-------|-------|-------|-------|-------|-------|-------|-------|-------|-------|--------|---|--------|-------|
| 78 kDa glucose-regulated protein<br>OS=Bos taurus<br>GN=HSPA5 PE=2<br>SV=1 | sp Q0VCX2 GRP78_BOVIN | kVTH<br>AVV<br>TVPA<br>YFN<br>DAQ<br>R | 59% | 35   | 54.15434 | Ref | 0.056  | -0.05 | -0.07 | -0.26  | -0.11 | 0.11  | 0.24  | 1890  | 1740  | 1760  | 1940  | 1870  | 1820  | 2220  | 2410  | 875.5 | 2623.5 | 3 | 0.0166 | 6.341 |
| 78 kDa glucose-regulated protein<br>OS=Bos taurus<br>GN=HSPA5 PE=2<br>SV=1 | sp Q0VCX2 GRP78_BOVIN | mKE<br>TAEA<br>YLK                     | 70% | 36.5 | 53.35123 | Ref | 0.046  | -0.12 | 0.15  | -0.049 | -0.2  | 0.16  | -0.2  | 23800 | 19700 | 19000 | 25700 | 24700 | 19400 | 26000 | 20200 | 718.4 | 2152.2 | 3 | 0.0147 | 6.829 |
| 78 kDa glucose-regulated protein<br>OS=Bos taurus<br>GN=HSPA5 PE=2<br>SV=1 | sp Q0VCX2 GRP78_BOVIN | nELE<br>SYAY<br>SLk                    | 93% | 46.4 | 53.64444 | Ref | -0.005 | 0.009 | 0.12  | -0.11  | -0.04 | -0.05 | -0.04 | 9860  | 8250  | 9040  | 11000 | 10300 | 9460  | 9810  | 9810  | 963   | 1924   | 2 | 0.0178 | 9.249 |
| 78 kDa glucose-regulated protein<br>OS=Bos taurus<br>GN=HSPA5 PE=2<br>SV=1 | sp Q0VCX2 GRP78_BOVIN | nELE<br>SYAY<br>SLk                    | 93% | 48.7 | 53.63371 | Ref | -0.049 | 0.005 | -0.13 | -0.26  | 0.073 | 0.28  | -0.05 | 20000 | 16700 | 18800 | 19200 | 19300 | 21300 | 25700 | 20300 | 642.3 | 1924   | 3 | 0.016  | 8.307 |
| 78 kDa glucose-regulated protein<br>OS=Bos taurus<br>GN=HSPA5 PE=2<br>SV=1 | sp Q0VCX2 GRP78_BOVIN | nELE<br>SYAY<br>SLk                    | 95% | 58.8 | 53.66324 | Ref | 0.063  | -0.02 | -0.01 | -0.089 | -0.07 | -0.16 | -0.02 | 5180  | 4040  | 4140  | 4680  | 4880  | 4310  | 4250  | 4640  | 963   | 1924   | 2 | 0.0146 | 7.597 |
| 78 kDa glucose-regulated protein<br>OS=Bos taurus<br>GN=HSPA5 PE=2<br>SV=1 | sp Q0VCX2 GRP78_BOVIN | nELE<br>SYAY<br>SLk                    | 82% | 40.8 | 53.64481 | Ref | -0.15  | 0.21  | -0.12 | -0.034 | -0.08 | 0.12  | -0.14 | 5250  | 3860  | 5360  | 4790  | 5610  | 4740  | 5680  | 4730  | 642.3 | 1924   | 3 | 0.0131 | 6.78  |

|                                                                            |                       |                             |     |      |          |     |        |       |       |        |       |       |       |       |       |       |       |       |       |       |       |       |        |   |        |       |
|----------------------------------------------------------------------------|-----------------------|-----------------------------|-----|------|----------|-----|--------|-------|-------|--------|-------|-------|-------|-------|-------|-------|-------|-------|-------|-------|-------|-------|--------|---|--------|-------|
| 78 kDa glucose-regulated protein<br>OS=Bos taurus<br>GN=HSPA5 PE=2<br>SV=1 | sp Q0VCX2 GRP78_BOVIN | nQLT<br>SNPE<br>NTVF<br>DAK | 94% | 51.6 | 54.42474 | Ref | 0.11   | 0.048 | 0.068 | -0.17  | -0.4  | -0.16 | -0.05 | 71500 | 51900 | 53900 | 61300 | 57200 | 42600 | 52600 | 56400 | 762.7 | 2285.2 | 3 | 0.0164 | 7.179 |
| 78 kDa glucose-regulated protein<br>OS=Bos taurus<br>GN=HSPA5 PE=2<br>SV=1 | sp Q0VCX2 GRP78_BOVIN | nQLT<br>SNPE<br>NTVF<br>DAK | 84% | 42.4 | 54.39655 | Ref | 0.23   | 0.14  | 0.15  | -0.02  | -0.4  | -0.29 | 0.069 | 3460  | 3630  | 3710  | 4190  | 4110  | 2750  | 3110  | 3950  | 763.1 | 2286.2 | 3 | 0.0145 | 6.341 |
| 78 kDa glucose-regulated protein<br>OS=Bos taurus<br>GN=HSPA5 PE=2<br>SV=1 | sp Q0VCX2 GRP78_BOVIN | nQLT<br>SNPE<br>nTVF<br>DAK | 91% | 47.3 | 54.38835 | Ref | 0.078  | -0.05 | 0.14  | -0.13  | -0.2  | 0.12  | -0.09 | 8010  | 7150  | 7120  | 9110  | 8290  | 6920  | 9000  | 7710  | 763.1 | 2286.2 | 3 | 0.0158 | 6.905 |
| 78 kDa glucose-regulated protein<br>OS=Bos taurus<br>GN=HSPA5 PE=2<br>SV=1 | sp Q0VCX2 GRP78_BOVIN | sDID<br>EIVL<br>VGG<br>STR  | 95% | 54.4 | 53.39004 | Ref | 0.13   | 0.095 | 0.045 | -0.13  | -0.28 | 0.025 | -0.03 | 6880  | 6370  | 6730  | 7300  | 7130  | 5590  | 7230  | 6930  | 883   | 1763.9 | 2 | 0.0116 | 6.562 |
| 78 kDa glucose-regulated protein<br>OS=Bos taurus<br>GN=HSPA5 PE=2<br>SV=1 | sp Q0VCX2 GRP78_BOVIN | tFAP<br>EEIS<br>AMV<br>LTk  | 88% | 44.6 | 54.12434 | Ref | -0.091 | 0.17  | 0.093 | -0.11  | -0.03 | 0.12  | -0.09 | 17900 | 16200 | 21100 | 22400 | 21400 | 19800 | 22900 | 19700 | 715.7 | 2144.2 | 3 | 0.0222 | 10.36 |
| 78 kDa glucose-regulated protein<br>OS=Bos taurus<br>GN=HSPA5 PE=2<br>SV=1 | sp Q0VCX2 GRP78_BOVIN | tFAP<br>EEIS<br>AMV<br>LTk  | 79% | 39.8 | 53.92667 | Ref | 0.098  | -0.03 | 0.045 | -0.023 | -0.05 | 0.07  | -0.02 | 11100 | 11500 | 11400 | 13500 | 14200 | 12200 | 13900 | 12900 | 715.7 | 2144.2 | 3 | 0.014  | 6.51  |

|                                                                            |                       |                                 |     |      |          |     |       |       |       |        |       |       |       |       |       |       |       |       |       |       |       |       |        |   |        |       |
|----------------------------------------------------------------------------|-----------------------|---------------------------------|-----|------|----------|-----|-------|-------|-------|--------|-------|-------|-------|-------|-------|-------|-------|-------|-------|-------|-------|-------|--------|---|--------|-------|
| 78 kDa glucose-regulated protein<br>OS=Bos taurus<br>GN=HSPA5 PE=2<br>SV=1 | sp Q0VCX2 GRP78_BOVIN | tFAP<br>EEIS<br>AMV<br>LTk      | 76% | 38.9 | 53.95001 | Ref | 0.18  | 0.031 | -0.12 | -0.009 | -0.23 | 0.23  | -0.14 | 2060  | 2100  | 2050  | 2080  | 2470  | 1850  | 2650  | 2040  | 715.7 | 2144.2 | 3 | 0.0129 | 5.993 |
| 78 kDa glucose-regulated protein<br>OS=Bos taurus<br>GN=HSPA5 PE=2<br>SV=1 | sp Q0VCX2 GRP78_BOVIN | tFAP<br>EEIS<br>AMV<br>LTk      | 91% | 46.9 | 53.96014 | Ref | 0.16  | 0.06  | 0.007 | -0.16  | -0.21 | 0.16  | -0.16 | 750   | 711   | 720   | 779   | 766   | 646   | 869   | 691   | 715.7 | 2144.2 | 3 | 0.0132 | 6.175 |
| 78 kDa glucose-regulated protein<br>OS=Bos taurus<br>GN=HSPA5 PE=2<br>SV=1 | sp Q0VCX2 GRP78_BOVIN | tkPYI<br>QVD<br>VGG<br>GQT<br>k | 76% | 36.8 | 52.01334 | Ref | 0.14  | -0.01 | 0.1   | -0.16  | -0.2  | 0.035 | -0.26 | 8680  | 7110  | 6940  | 8410  | 7740  | 6570  | 8080  | 6520  | 835.2 | 2502.4 | 3 | 0.0144 | 5.749 |
| 78 kDa glucose-regulated protein<br>OS=Bos taurus<br>GN=HSPA5 PE=2<br>SV=1 | sp Q0VCX2 GRP78_BOVIN | tWN<br>DPS<br>VQQ<br>Dik        | 84% | 41.8 | 53.95012 | Ref | 0.062 | -0.11 | -0.09 | 0.1    | -0.35 | 0.19  | -0.08 | 87500 | 71600 | 69200 | 78400 | 98800 | 63100 | 96100 | 78700 | 680.4 | 2038.1 | 3 | 0.0173 | 8.501 |
| 78 kDa glucose-regulated protein<br>OS=Bos taurus<br>GN=HSPA5 PE=2<br>SV=1 | sp Q0VCX2 GRP78_BOVIN | tWN<br>DPS<br>VQQ<br>Dik        | 92% | 45.6 | 53.9745  | Ref | 0.12  | -0.16 | 0.15  | 0.045  | -0.44 | 0.19  | -0.14 | 19700 | 17800 | 15800 | 22100 | 22600 | 14100 | 22800 | 18000 | 1020  | 2038.1 | 2 | 0.0145 | 7.115 |
| 78 kDa glucose-regulated protein<br>OS=Bos taurus<br>GN=HSPA5 PE=2<br>SV=1 | sp Q0VCX2 GRP78_BOVIN | VEIIA<br>NDQ<br>GNR             | 89% | 41.8 | 52.29767 | Ref | 0.2   | -0.06 | 0.12  | -0.13  | -0.17 | -0.25 | -0.04 | 78100 | 67500 | 61300 | 77500 | 72100 | 61100 | 60400 | 69300 | 766.9 | 1531.8 | 2 | 0.0115 | 7.474 |

|                                                                                                          |                        |                               |     |      |          |     |       |       |       |        |       |       |       |       |       |       |       |       |       |       |       |       |        |   |        |       |
|----------------------------------------------------------------------------------------------------------|------------------------|-------------------------------|-----|------|----------|-----|-------|-------|-------|--------|-------|-------|-------|-------|-------|-------|-------|-------|-------|-------|-------|-------|--------|---|--------|-------|
| 78 kDa glucose-regulated protein<br>OS=Bos taurus<br>GN=HSPA5 PE=2<br>SV=1                               | sp Q0VCX2 GRP78_BOVIN  | vEIIANDQ<br>GnR               | 85% | 39.4 | 51.95565 | Ref | 0.15  | 0.041 | -0.04 | -0.17  | -0.12 | -0.19 | 0.15  | 14900 | 13600 | 13700 | 14500 | 14700 | 13200 | 13100 | 16500 | 767.4 | 1532.8 | 2 | 0.0129 | 8.426 |
| 78 kDa glucose-regulated protein<br>OS=Bos taurus<br>GN=HSPA5 PE=2<br>SV=1                               | sp Q0VCX2 GRP78_BOVIN  | vLED<br>SDLK                  | 51% | 31.7 | 52.42107 | Ref | 0.1   | -0.03 | 0.053 | -0.2   | -0.13 | 0.19  | -0.11 | 27700 | 25300 | 25200 | 29900 | 27700 | 25300 | 33000 | 26700 | 763.9 | 1525.9 | 2 | 0.022  | 14.38 |
| 78 kDa glucose-regulated protein<br>OS=Bos taurus<br>GN=HSPA5 PE=2<br>SV=1                               | sp Q0VCX2 GRP78_BOVIN  | vTHAVVT<br>VPAY<br>FND<br>AQR | 81% | 41.1 | 54.43728 | Ref | 0.16  | -0.05 | 0.02  | -0.18  | -0.25 | 0.089 | 0.13  | 5470  | 5390  | 5060  | 5970  | 5740  | 4750  | 6290  | 6440  | 731.4 | 2191.2 | 3 | 0.0123 | 5.597 |
| 78 kDa glucose-regulated protein<br>OS=Bos taurus<br>GN=HSPA5 PE=2<br>SV=1                               | sp Q0VCX2 GRP78_BOVIN  | vTHAVVT<br>VPAY<br>FND<br>AQR | 89% | 46   | 54.43728 | Ref | 0.28  | -0.04 | 0.073 | -0.079 | -0.14 | 0.098 | -0.2  | 4220  | 4800  | 4150  | 5050  | 5010  | 4180  | 5160  | 4160  | 731.4 | 2191.2 | 3 | 0.0123 | 5.597 |
| Putative uncharacterized protein (Fragment)<br>OS=Ailuropoda melanoleuca<br>GN=PANDA_014933<br>SV=4 SV=1 | tr D2HS92 D2HS92_AILME | aDID<br>ISGP<br>k             | 89% | 41.2 | 51.56422 | Ref | -0.53 | -0.31 | -0.4  | -0.27  | -0.08 | -0.51 | -0.31 | 18600 | 12000 | 15200 | 16000 | 19300 | 19200 | 15000 | 17000 | 762.4 | 1522.9 | 2 | 0.0102 | 6.706 |

|                                                                                                          |                        |                                |     |      |          |     |       |       |       |        |       |       |       |       |       |       |        |        |       |       |        |       |        |   |        |       |
|----------------------------------------------------------------------------------------------------------|------------------------|--------------------------------|-----|------|----------|-----|-------|-------|-------|--------|-------|-------|-------|-------|-------|-------|--------|--------|-------|-------|--------|-------|--------|---|--------|-------|
| Putative uncharacterized protein (Fragment)<br>OS=Ailuropoda melanoleuca<br>GN=PANDA_014933<br>PE=4 SV=1 | tr D2HS92 D2HS92_AILME | aDID<br>VSG<br>Pk              | 93% | 44.2 | 51.98503 | Ref | -0.72 | -0.41 | -0.24 | -0.035 | -0.08 | -0.84 | -0.4  | 2E+05 | 82600 | 1E+05 | 141000 | 178000 | 2E+05 | 92800 | 126000 | 755.4 | 1508.9 | 2 | 0.0151 | 10.01 |
| Putative uncharacterized protein (Fragment)<br>OS=Ailuropoda melanoleuca<br>GN=PANDA_014933<br>PE=4 SV=1 | tr D2HS92 D2HS92_AILME | aPD<br>VEV<br>QGA<br>DWS<br>Lk | 75% | 38.7 | 54.22068 | Ref | -0.44 | -0.43 | -0.3  | -0.29  | -0.13 | -0.44 | -0.17 | 7000  | 5460  | 5980  | 7330   | 8160   | 7940  | 6670  | 8020   | 708.4 | 2122.1 | 3 | 0.0246 | 11.61 |
| Putative uncharacterized protein (Fragment)<br>OS=Ailuropoda melanoleuca<br>GN=PANDA_014933<br>PE=4 SV=1 | tr D2HS92 D2HS92_AILME | aPD<br>VEV<br>QGA<br>DWS<br>Lk | 88% | 44.6 | 54.20558 | Ref | -0.77 | -0.25 | -0.39 | -0.28  | 0.14  | -0.68 | -0.35 | 19600 | 10700 | 16600 | 16900  | 20100  | 23400 | 13800 | 17300  | 708.4 | 2122.1 | 3 | 0.0175 | 8.242 |



|                                                                                                          |                        |                                |     |      |          |     |       |       |       |       |       |       |       |       |       |       |       |       |       |       |       |       |        |   |        |       |
|----------------------------------------------------------------------------------------------------------|------------------------|--------------------------------|-----|------|----------|-----|-------|-------|-------|-------|-------|-------|-------|-------|-------|-------|-------|-------|-------|-------|-------|-------|--------|---|--------|-------|
| Putative uncharacterized protein (Fragment)<br>OS=Ailuropoda melanoleuca<br>GN=PANDA_014933<br>PE=4 SV=1 | tr D2HS92 D2HS92_AILME | aPD<br>VEV<br>QGA<br>DWS<br>Lk | 76% | 39.2 | 54.20733 | Ref | -0.82 | -0.45 | -0.28 | -0.17 | -0.06 | -0.45 | -0.34 | 29400 | 15000 | 21000 | 26400 | 31500 | 29700 | 23700 | 25300 | 708.4 | 2122.1 | 3 | 0.0146 | 6.872 |
| Putative uncharacterized protein (Fragment)<br>OS=Ailuropoda melanoleuca<br>GN=PANDA_014933<br>PE=4 SV=1 | tr D2HS92 D2HS92_AILME | aPEV<br>Dlk                    | 61% | 30.6 | 49.70663 | Ref | -0.63 | -0.18 | -0.56 | -0.21 | -0.08 | -0.71 | -0.73 | 1E+05 | 55200 | 82100 | 70500 | 99300 | 94800 | 64000 | 62800 | 690.4 | 1378.8 | 2 | 0.0052 | 3.791 |
| Putative uncharacterized protein (Fragment)<br>OS=Ailuropoda melanoleuca<br>GN=PANDA_014933<br>PE=4 SV=1 | tr D2HS92 D2HS92_AILME | eVG<br>VDIN<br>FPk             | 76% | 38   | 53.06406 | Ref | -0.73 | -0.41 | -0.56 | -0.19 | 0.01  | -0.87 | -0.03 | 22000 | 11400 | 15400 | 15500 | 22200 | 22200 | 12600 | 22400 | 576   | 1725   | 3 | 0.0188 | 10.89 |

|                                                                                                          |                        |                   |     |      |          |     |       |       |       |        |       |       |       |       |       |       |       |       |       |       |       |       |        |   |        |       |
|----------------------------------------------------------------------------------------------------------|------------------------|-------------------|-----|------|----------|-----|-------|-------|-------|--------|-------|-------|-------|-------|-------|-------|-------|-------|-------|-------|-------|-------|--------|---|--------|-------|
| Putative uncharacterized protein (Fragment)<br>OS=Ailuropoda melanoleuca<br>GN=PANDA_014933<br>PE=4 SV=1 | tr D2HS92 D2HS92_AILME | gDF<br>DVS<br>VPk | 74% | 36.1 | 52.33116 | Ref | -0.72 | -0.27 | -0.41 | -0.2   | 0.061 | -0.67 | -0.24 | 18600 | 11000 | 16400 | 16700 | 21300 | 22200 | 14000 | 18700 | 786.4 | 1570.9 | 2 | 0.0049 | 3.09  |
| Putative uncharacterized protein (Fragment)<br>OS=Ailuropoda melanoleuca<br>GN=PANDA_014933<br>PE=4 SV=1 | tr D2HS92 D2HS92_AILME | gDV<br>DVSL<br>Pk | 77% | 35.6 | 51.2592  | Ref | -0.54 | -0.35 | -0.48 | -0.24  | -0.17 | -0.53 | -0.48 | 60900 | 32500 | 40100 | 41100 | 53500 | 49100 | 39800 | 40900 | 769.4 | 1536.9 | 2 | 0.0132 | 8.56  |
| Putative uncharacterized protein (Fragment)<br>OS=Ailuropoda melanoleuca<br>GN=PANDA_014933<br>PE=4 SV=1 | tr D2HS92 D2HS92_AILME | gDVS<br>ISGP<br>k | 85% | 39.7 | 51.33341 | Ref | -0.67 | -0.28 | -0.55 | -0.028 | -0.06 | -0.62 | -0.34 | 27400 | 15800 | 22500 | 21000 | 33100 | 28300 | 20100 | 24200 | 490   | 1466.9 | 3 | 0.0039 | 2.663 |

|                                                                                                          |                        |                          |     |      |          |     |       |       |       |       |       |       |       |       |       |       |       |       |       |       |       |       |      |   |        |       |
|----------------------------------------------------------------------------------------------------------|------------------------|--------------------------|-----|------|----------|-----|-------|-------|-------|-------|-------|-------|-------|-------|-------|-------|-------|-------|-------|-------|-------|-------|------|---|--------|-------|
| Putative uncharacterized protein (Fragment)<br>OS=Ailuropoda melanoleuca<br>GN=PANDA_014933<br>PE=4 SV=1 | tr D2HS92 D2HS92_AILME | gEGP<br>DVD<br>VNLP<br>k | 95% | 63.3 | 53.45307 | Ref | -0.61 | -0.27 | -0.4  | -0.28 | -0.06 | -0.57 | -0.51 | 15400 | 8200  | 11300 | 11600 | 13900 | 14100 | 10400 | 10700 | 924.5 | 1847 | 2 | 0.0129 | 6.986 |
| Putative uncharacterized protein (Fragment)<br>OS=Ailuropoda melanoleuca<br>GN=PANDA_014933<br>PE=4 SV=1 | tr D2HS92 D2HS92_AILME | gEGP<br>EVD<br>VNLP<br>k | 95% | 63.3 | 53.4113  | Ref | -0.81 | -0.27 | -0.34 | -0.19 | -0.07 | -0.73 | -0.47 | 24500 | 10800 | 17100 | 18200 | 22300 | 21100 | 14000 | 16600 | 931.5 | 1861 | 2 | 0.0152 | 8.182 |
| Putative uncharacterized protein (Fragment)<br>OS=Ailuropoda melanoleuca<br>GN=PANDA_014933<br>PE=4 SV=1 | tr D2HS92 D2HS92_AILME | gEGP<br>EVD<br>VNLP<br>k | 95% | 67.8 | 53.44697 | Ref | -1.2  | -0.28 | -0.36 | -0.17 | 0.011 | -1.1  | -0.5  | 59700 | 17300 | 34400 | 36500 | 45900 | 45500 | 22000 | 33100 | 931.5 | 1861 | 2 | 0.014  | 7.527 |

|                                                                                                          |                        |                            |     |      |          |     |       |       |       |       |       |       |       |       |       |       |       |       |       |       |       |       |        |   |        |       |
|----------------------------------------------------------------------------------------------------------|------------------------|----------------------------|-----|------|----------|-----|-------|-------|-------|-------|-------|-------|-------|-------|-------|-------|-------|-------|-------|-------|-------|-------|--------|---|--------|-------|
| Putative uncharacterized protein (Fragment)<br>OS=Ailuropoda melanoleuca<br>GN=PANDA_014933<br>PE=4 SV=1 | tr D2HS92 D2HS92_AILME | gEYD<br>VTVP<br>k          | 95% | 53   | 52.51765 | Ref | -0.73 | -0.25 | -0.32 | -0.19 | -0.07 | -0.62 | -0.46 | 26100 | 13400 | 20300 | 21700 | 26100 | 24700 | 17600 | 19600 | 808.5 | 1614.9 | 2 | 0.0136 | 8.443 |
| Putative uncharacterized protein (Fragment)<br>OS=Ailuropoda melanoleuca<br>GN=PANDA_014933<br>PE=4 SV=1 | tr D2HS92 D2HS92_AILME | gHYE<br>VTGS<br>DDE<br>TGk | 88% | 43.1 | 52.43123 | Ref | -0.63 | -0.14 | -0.45 | -0.41 | -0.05 | -0.61 | -0.37 | 3550  | 1940  | 2950  | 2670  | 3020  | 3390  | 2410  | 2810  | 701.7 | 2102   | 3 | 0.0258 | 12.27 |
| Putative uncharacterized protein (Fragment)<br>OS=Ailuropoda melanoleuca<br>GN=PANDA_014933<br>PE=4 SV=1 | tr D2HS92 D2HS92_AILME | gPEV<br>DISG<br>Pk         | 88% | 41.1 | 52.54376 | Ref | -0.42 | -0.43 | -0.46 | -0.46 | -0.21 | -0.6  | -0.19 | 11800 | 6860  | 7390  | 8130  | 8940  | 9310  | 7410  | 9760  | 804   | 1605.9 | 2 | 0.0193 | 11.99 |

|                                                                                                          |                        |                             |     |      |          |     |       |       |       |        |       |       |       |       |       |       |       |       |       |       |       |       |        |   |        |       |
|----------------------------------------------------------------------------------------------------------|------------------------|-----------------------------|-----|------|----------|-----|-------|-------|-------|--------|-------|-------|-------|-------|-------|-------|-------|-------|-------|-------|-------|-------|--------|---|--------|-------|
| Putative uncharacterized protein (Fragment)<br>OS=Ailuropoda melanoleuca<br>GN=PANDA_014933<br>PE=4 SV=1 | tr D2HS92 D2HS92_AILME | gPSL<br>QGD<br>LAVS<br>GDIK | 86% | 42.4 | 53.47523 | Ref | 1     | -0.68 | -0.7  | -0.74  | -0.44 | -0.75 | -0.72 | 14500 | 38200 | 12800 | 14200 | 15200 | 16300 | 13700 | 13900 | 689.1 | 2064.2 | 3 | 0.0152 | 7.378 |
| Putative uncharacterized protein (Fragment)<br>OS=Ailuropoda melanoleuca<br>GN=PANDA_014933<br>PE=4 SV=1 | tr D2HS92 D2HS92_AILME | iSMP<br>DFDL<br>HLK         | 50% | 33   | 53.55614 | Ref | -0.54 | -0.21 | -0.44 | -0.24  | -0.06 | -0.63 | -0.46 | 4930  | 2960  | 4020  | 3850  | 4870  | 4840  | 3400  | 3790  | 642   | 1923.1 | 3 | 0.0162 | 8.426 |
| Putative uncharacterized protein (Fragment)<br>OS=Ailuropoda melanoleuca<br>GN=PANDA_014933<br>PE=4 SV=1 | tr D2HS92 D2HS92_AILME | iSMP<br>DIDL<br>NLkG<br>Pk  | 66% | 31.4 | 50.98433 | Ref | -0.89 | -0.44 | -0.24 | -0.006 | -0.08 | -0.51 | -0.23 | 13800 | 7750  | 11400 | 14800 | 19100 | 15900 | 12300 | 14800 | 614.1 | 2452.4 | 4 | 0.0072 | 2.934 |

|                                                                                                          |                        |                            |     |      |          |     |       |       |       |       |       |       |       |       |       |       |       |       |       |       |       |       |        |   |        |       |
|----------------------------------------------------------------------------------------------------------|------------------------|----------------------------|-----|------|----------|-----|-------|-------|-------|-------|-------|-------|-------|-------|-------|-------|-------|-------|-------|-------|-------|-------|--------|---|--------|-------|
| Putative uncharacterized protein (Fragment)<br>OS=Ailuropoda melanoleuca<br>GN=PANDA_014933<br>PE=4 SV=1 | tr D2HS92 D2HS92_AILME | iSMP<br>DIDL<br>nLkG<br>Pk | 55% | 30.5 | 52.07734 | Ref | -0.61 | -0.55 | -0.43 | -0.14 | 0.042 | -0.34 | -0.2  | 3520  | 2540  | 2870  | 3490  | 4700  | 4670  | 3740  | 4090  | 614.4 | 2453.4 | 4 | 0.0167 | 6.816 |
| Putative uncharacterized protein (Fragment)<br>OS=Ailuropoda melanoleuca<br>GN=PANDA_014933<br>PE=4 SV=1 | tr D2HS92 D2HS92_AILME | iSMP<br>DVD<br>LHM<br>k    | 89% | 45.1 | 53.61063 | Ref | -0.74 | -0.29 | -0.5  | -0.11 | -0.04 | -0.56 | -0.34 | 17500 | 9290  | 13800 | 13400 | 19300 | 17700 | 12900 | 14900 | 632   | 1893   | 3 | 0.0149 | 7.885 |
| Putative uncharacterized protein (Fragment)<br>OS=Ailuropoda melanoleuca<br>GN=PANDA_014933<br>PE=4 SV=1 | tr D2HS92 D2HS92_AILME | iSMP<br>DVD<br>LNLk        | 82% | 40.1 | 53.09705 | Ref | -0.63 | -0.29 | -0.3  | -0.28 | -0.23 | -0.57 | -0.44 | 1E+05 | 52600 | 72100 | 80400 | 89500 | 81200 | 66800 | 72700 | 618.4 | 1852   | 3 | 0.0142 | 7.669 |

|                                                                                                          |                        |                   |     |      |          |     |       |       |       |       |       |       |       |       |       |       |       |       |       |       |       |       |        |   |        |       |
|----------------------------------------------------------------------------------------------------------|------------------------|-------------------|-----|------|----------|-----|-------|-------|-------|-------|-------|-------|-------|-------|-------|-------|-------|-------|-------|-------|-------|-------|--------|---|--------|-------|
| Putative uncharacterized protein (Fragment)<br>OS=Ailuropoda melanoleuca<br>GN=PANDA_014933<br>PE=4 SV=1 | tr D2HS92 D2HS92_AILME | iSMP DVD LNLK     | 94% | 49.9 | 52.97373 | Ref | -0.33 | -0.36 | -0.37 | -0.32 | -0.27 | -0.7  | -0.43 | 19900 | 12100 | 12900 | 14400 | 16400 | 14800 | 11500 | 13800 | 618.4 | 1852   | 3 | 0.0102 | 5.5   |
| Putative uncharacterized protein (Fragment)<br>OS=Ailuropoda melanoleuca<br>GN=PANDA_014933<br>PE=4 SV=1 | tr D2HS92 D2HS92_AILME | iSMP DVD LNLK GPK | 72% | 35.4 | 51.58848 | Ref | -0.79 | -0.5  | -0.29 | 0.019 | 0.12  | -0.66 | -0.36 | 12300 | 7260  | 9660  | 12500 | 17100 | 16000 | 9710  | 11900 | 813.8 | 2438.4 | 3 | 0.0139 | 5.681 |
| Putative uncharacterized protein (Fragment)<br>OS=Ailuropoda melanoleuca<br>GN=PANDA_014933<br>PE=4 SV=1 | tr D2HS92 D2HS92_AILME | iSMP DVG LNLK     | 64% | 34.2 | 52.32005 | Ref | -0.45 | -0.52 | -0.24 | -0.27 | 0.016 | -0.81 | -0.28 | 12200 | 8030  | 8320  | 11300 | 12200 | 13000 | 7660  | 11000 | 599   | 1794   | 3 | 0.0147 | 8.194 |

|                                                                                                          |                  |                                        |     |      |          |     |       |       |       |       |       |       |       |       |       |       |       |       |       |       |       |       |        |   |        |       |
|----------------------------------------------------------------------------------------------------------|------------------|----------------------------------------|-----|------|----------|-----|-------|-------|-------|-------|-------|-------|-------|-------|-------|-------|-------|-------|-------|-------|-------|-------|--------|---|--------|-------|
| Putative uncharacterized protein (Fragment)<br>OS=Ailuropoda melanoleuca<br>GN=PANDA_014933<br>PE=4 SV=1 | tr D2HS92 _AILME | tPQI<br>SMS<br>DIDL<br>NLk             | 82% | 41.3 | 54.03853 | Ref | -0.26 | -0.38 | -0.48 | -0.34 | -0.16 | -0.56 | -0.47 | 10200 | 7020  | 6980  | 7330  | 8910  | 8800  | 6960  | 7360  | 728.4 | 2182.2 | 3 | 0.0154 | 7.033 |
| Putative uncharacterized protein (Fragment)<br>OS=Ailuropoda melanoleuca<br>GN=PANDA_014933<br>PE=4 SV=1 | tr D2HS92 _AILME | tPQI<br>SMS<br>DIDL<br>NLkG<br>Pk      | 75% | 35.8 | 53.18356 | Ref | -0.8  | 0.14  | -0.26 | -0.17 | -0.11 | -0.72 | -0.41 | 18200 | 11700 | 24400 | 20800 | 24400 | 22100 | 15100 | 18600 | 693.1 | 2768.6 | 4 | 0.0245 | 8.861 |
| Putative uncharacterized protein (Fragment)<br>OS=Ailuropoda melanoleuca<br>GN=PANDA_014933<br>PE=4 SV=1 | tr D2HS92 _AILME | vDID<br>APD<br>VDV<br>HGP<br>DWH<br>Lk | 93% | 47.8 | 55.18826 | Ref | -0.5  | -0.56 | -0.41 | -0.16 | -0.12 | -0.52 | -0.58 | 29300 | 15800 | 16500 | 20500 | 26800 | 24100 | 19100 | 18100 | 659.8 | 2635.4 | 4 | 0.0233 | 8.846 |



|                                                                                                          |                        |                                        |     |      |          |     |       |       |       |        |       |       |       |       |       |       |       |       |       |       |       |       |        |   |        |       |
|----------------------------------------------------------------------------------------------------------|------------------------|----------------------------------------|-----|------|----------|-----|-------|-------|-------|--------|-------|-------|-------|-------|-------|-------|-------|-------|-------|-------|-------|-------|--------|---|--------|-------|
| Putative uncharacterized protein (Fragment)<br>OS=Ailuropoda melanoleuca<br>GN=PANDA_014933<br>PE=4 SV=1 | tr D2HS92 D2HS92_AILME | vDID<br>VPD<br>VDV<br>HGP<br>DWH<br>Lk | 93% | 49.2 | 55.32871 | Ref | -0.76 | -0.39 | -0.51 | -0.14  | -0.07 | -0.71 | -0.21 | 26300 | 12600 | 17700 | 18200 | 25900 | 23800 | 15900 | 22300 | 666.9 | 2663.4 | 4 | 0.0248 | 9.297 |
| Putative uncharacterized protein (Fragment)<br>OS=Ailuropoda melanoleuca<br>GN=PANDA_014933<br>PE=4 SV=1 | tr D2HS92 D2HS92_AILME | vDID<br>VPD<br>VDV<br>HGP<br>DWH<br>Lk | 93% | 48.2 | 55.31913 | Ref | -0.95 | -0.56 | -0.46 | -0.16  | -0.05 | -0.53 | -0.04 | 23100 | 10300 | 14700 | 17600 | 24000 | 22500 | 16900 | 23600 | 666.9 | 2663.4 | 4 | 0.0201 | 7.556 |
| Putative uncharacterized protein (Fragment)<br>OS=Ailuropoda melanoleuca<br>GN=PANDA_014933<br>PE=4 SV=1 | tr D2HS92 D2HS92_AILME | vDID<br>VPD<br>VDV<br>HGP<br>DWH<br>Lk | 95% | 60.6 | 55.30541 | Ref | -0.66 | -0.29 | -0.45 | -0.076 | -0.06 | -0.7  | -0.37 | 6710  | 3770  | 5260  | 5280  | 7550  | 6670  | 4480  | 5590  | 888.8 | 2663.4 | 3 | 0.0176 | 6.593 |

|                                                                                                          |                        |                                        |     |      |          |     |       |       |       |        |       |       |       |       |       |       |       |       |       |       |       |       |        |   |        |       |
|----------------------------------------------------------------------------------------------------------|------------------------|----------------------------------------|-----|------|----------|-----|-------|-------|-------|--------|-------|-------|-------|-------|-------|-------|-------|-------|-------|-------|-------|-------|--------|---|--------|-------|
| Putative uncharacterized protein (Fragment)<br>OS=Ailuropoda melanoleuca<br>GN=PANDA_014933<br>PE=4 SV=1 | tr D2HS92 D2HS92_AILME | vDID<br>VPD<br>VDV<br>HGP<br>DWH<br>Lk | 93% | 49   | 55.3121  | Ref | -0.19 | -0.06 | -0.46 | -0.36  | -0.28 | -0.55 | -0.4  | 915   | 812   | 970   | 821   | 971   | 898   | 776   | 856   | 666.9 | 2663.4 | 4 | 0.0182 | 6.82  |
| Putative uncharacterized protein (Fragment)<br>OS=Ailuropoda melanoleuca<br>GN=PANDA_014933<br>PE=4 SV=1 | tr D2HS92 D2HS92_AILME | vDID<br>VPD<br>VNIE<br>GPD<br>Ak       | 51% | 32.3 | 54.61552 | Ref | -0.54 | -0.29 | -0.47 | -0.33  | -0.3  | -0.49 | -0.42 | 8430  | 4300  | 5570  | 5510  | 6670  | 5940  | 5460  | 5680  | 576.8 | 2303.2 | 4 | 0.025  | 10.85 |
| Putative uncharacterized protein (Fragment)<br>OS=Ailuropoda melanoleuca<br>GN=PANDA_014933<br>PE=4 SV=1 | tr D2HS92 D2HS92_AILME | vDID<br>VPD<br>VNIE<br>GPD<br>Ak       | 95% | 59.9 | 54.60561 | Ref | -1.5  | -0.14 | -0.64 | -0.071 | 0.017 | -0.69 | -0.26 | 51900 | 14500 | 39100 | 31100 | 50900 | 47200 | 30300 | 40400 | 768.8 | 2303.2 | 3 | 0.0181 | 7.857 |

|                                                                                                          |                        |                                  |     |      |          |     |       |       |       |        |       |       |       |       |       |       |       |       |       |       |       |       |        |   |        |       |
|----------------------------------------------------------------------------------------------------------|------------------------|----------------------------------|-----|------|----------|-----|-------|-------|-------|--------|-------|-------|-------|-------|-------|-------|-------|-------|-------|-------|-------|-------|--------|---|--------|-------|
| Putative uncharacterized protein (Fragment)<br>OS=Ailuropoda melanoleuca<br>GN=PANDA_014933<br>PE=4 SV=1 | tr D2HS92 D2HS92_AILME | vDID<br>VPD<br>VNIE<br>GPD<br>Ak | 95% | 54.5 | 54.58472 | Ref | -0.76 | -0.15 | -0.24 | -0.061 | 0.025 | -0.99 | -0.4  | 2370  | 1370  | 2260  | 2380  | 2970  | 2750  | 1420  | 2120  | 1153  | 2303.2 | 2 | 0.0154 | 6.665 |
| Putative uncharacterized protein (Fragment)<br>OS=Ailuropoda melanoleuca<br>GN=PANDA_014933<br>PE=4 SV=1 | tr D2HS92 D2HS92_AILME | vDID<br>VPD<br>VNIE<br>GPD<br>Ak | 70% | 37.7 | 54.54792 | Ref | -0.37 | -0.31 | -0.16 | -0.29  | -0.09 | -0.71 | -0.2  | 7560  | 6810  | 7750  | 9640  | 9690  | 9730  | 6600  | 9330  | 768.8 | 2303.2 | 3 | 0.0111 | 4.836 |
| Putative uncharacterized protein (Fragment)<br>OS=Ailuropoda melanoleuca<br>GN=PANDA_014933<br>PE=4 SV=1 | tr D2HS92 D2HS92_AILME | vDIE<br>APD<br>VSLE<br>GPE<br>Gk | 95% | 65.3 | 54.81418 | Ref | -0.53 | 0.004 | -1.1  | -0.13  | -0.13 | -0.89 | -0.26 | 85300 | 47100 | 73900 | 39600 | 83100 | 72700 | 44800 | 69000 | 755.1 | 2262.2 | 3 | 0.0178 | 7.844 |

|                                                                                                          |                        |                                  |     |      |          |     |       |       |       |        |       |       |       |       |       |       |       |       |       |       |       |       |        |   |        |       |
|----------------------------------------------------------------------------------------------------------|------------------------|----------------------------------|-----|------|----------|-----|-------|-------|-------|--------|-------|-------|-------|-------|-------|-------|-------|-------|-------|-------|-------|-------|--------|---|--------|-------|
| Putative uncharacterized protein (Fragment)<br>OS=Ailuropoda melanoleuca<br>GN=PANDA_014933<br>PE=4 SV=1 | tr D2HS92 D2HS92_AILME | vDIE<br>APD<br>VSLE<br>GPE<br>Gk | 95% | 61.6 | 54.81418 | Ref | -0.63 | -0.4  | -0.36 | -0.089 | -0.2  | -0.47 | -0.29 | 5580  | 3360  | 4260  | 4910  | 6550  | 5310  | 4580  | 5140  | 755.1 | 2262.2 | 3 | 0.0178 | 7.844 |
| Putative uncharacterized protein (Fragment)<br>OS=Ailuropoda melanoleuca<br>GN=PANDA_014933<br>PE=4 SV=1 | tr D2HS92 D2HS92_AILME | vDIE<br>GPD<br>VNIE<br>GPE<br>Gk | 51% | 34   | 54.51963 | Ref | -0.38 | -0.14 | -0.72 | -0.24  | -0.46 | -0.06 | -0.72 | 16400 | 10400 | 13400 | 10100 | 15500 | 11600 | 16000 | 10000 | 759.4 | 2275.2 | 3 | 0.0258 | 11.34 |
| Putative uncharacterized protein (Fragment)<br>OS=Ailuropoda melanoleuca<br>GN=PANDA_014933<br>PE=4 SV=1 | tr D2HS92 D2HS92_AILME | vDIN<br>APD<br>VEV<br>QGk        | 75% | 38.4 | 53.75225 | Ref | -0.38 | -0.18 | -0.39 | -0.43  | -0.2  | -0.52 | -0.43 | 25700 | 17200 | 21500 | 20800 | 22300 | 22800 | 19100 | 20100 | 664.7 | 1991.1 | 3 | 0.0189 | 9.498 |

|                                                                                                          |                        |                              |     |      |          |     |        |       |       |       |       |       |       |       |      |       |       |       |       |       |       |       |        |   |        |       |
|----------------------------------------------------------------------------------------------------------|------------------------|------------------------------|-----|------|----------|-----|--------|-------|-------|-------|-------|-------|-------|-------|------|-------|-------|-------|-------|-------|-------|-------|--------|---|--------|-------|
| Putative uncharacterized protein (Fragment)<br>OS=Ailuropoda melanoleuca<br>GN=PANDA_014933<br>PE=4 SV=1 | tr D2HS92 D2HS92_AILME | vDIS<br>APDL<br>SLEG<br>PEGk | 70% | 37.6 | 54.31232 | Ref | -0.03  | -0.41 | -0.33 | -0.42 | -0.26 | -0.5  | -0.5  | 2470  | 2230 | 1860  | 2210  | 2290  | 2220  | 1980  | 1960  | 745.7 | 2234.2 | 3 | 0.0186 | 8.326 |
| Putative uncharacterized protein (Fragment)<br>OS=Ailuropoda melanoleuca<br>GN=PANDA_014933<br>PE=4 SV=1 | tr D2HS92 D2HS92_AILME | vDIS<br>APDL<br>SLEG<br>PEGk | 78% | 39.7 | 54.31232 | Ref | -0.027 | -0.28 | -0.44 | -0.35 | -0.23 | -0.63 | -0.41 | 5100  | 4890 | 4460  | 4460  | 5260  | 4980  | 3930  | 4550  | 745.7 | 2234.2 | 3 | 0.0186 | 8.326 |
| Putative uncharacterized protein (Fragment)<br>OS=Ailuropoda melanoleuca<br>GN=PANDA_014933<br>PE=4 SV=1 | tr D2HS92 D2HS92_AILME | vDIS<br>APDL<br>SLEG<br>PEGk | 93% | 49.8 | 54.29207 | Ref | -0.68  | -0.2  | -0.59 | -0.35 | -0.12 | -0.4  | -0.13 | 13600 | 7880 | 11900 | 10200 | 13300 | 13600 | 11700 | 14000 | 745.7 | 2234.2 | 3 | 0.017  | 7.588 |

|                                                                                                          |                        |                                        |     |      |          |     |       |       |       |        |       |       |       |       |       |       |       |       |       |       |       |       |        |   |        |       |
|----------------------------------------------------------------------------------------------------------|------------------------|----------------------------------------|-----|------|----------|-----|-------|-------|-------|--------|-------|-------|-------|-------|-------|-------|-------|-------|-------|-------|-------|-------|--------|---|--------|-------|
| Putative uncharacterized protein (Fragment)<br>OS=Ailuropoda melanoleuca<br>GN=PANDA_014933<br>PE=4 SV=1 | tr D2HS92 D2HS92_AILME | vDV<br>DVP<br>DVD<br>VHG<br>PDW<br>HLk | 77% | 40.5 | 55.38118 | Ref | -0.68 | -0.3  | -0.49 | -0.3   | -0.05 | -0.54 | -0.38 | 3250  | 1640  | 2310  | 2280  | 2850  | 2970  | 2200  | 2450  | 884.1 | 2649.4 | 3 | 0.0137 | 5.173 |
| Putative uncharacterized protein (Fragment)<br>OS=Ailuropoda melanoleuca<br>GN=PANDA_014933<br>PE=4 SV=1 | tr D2HS92 D2HS92_AILME | vEG<br>DLkG<br>PEV<br>DlkG<br>Pk       | 66% | 25.5 | 48.78079 | Ref | -0.93 | -0.47 | -0.43 | -0.097 | 0.12  | -0.28 | -0.05 | 43600 | 29900 | 44600 | 51600 | 71500 | 72600 | 57400 | 66900 | 580.4 | 2896.7 | 5 | 0.0126 | 4.349 |
| Putative uncharacterized protein (Fragment)<br>OS=Ailuropoda melanoleuca<br>GN=PANDA_014933<br>PE=4 SV=1 | tr D2HS92 D2HS92_AILME | vkGD<br>VDLS<br>LPk                    | 64% | 26.3 | 49.99683 | Ref | -0.56 | -0.5  | -0.43 | -0.24  | -0.17 | -0.36 | -0.35 | 3270  | 1860  | 2110  | 2480  | 3120  | 2850  | 2610  | 2620  | 417.5 | 2082.2 | 5 | 0.0327 | 15.72 |

|                                                                                                          |                        |                           |     |      |          |     |       |       |       |        |       |       |       |       |       |       |       |       |       |       |       |       |        |   |        |       |
|----------------------------------------------------------------------------------------------------------|------------------------|---------------------------|-----|------|----------|-----|-------|-------|-------|--------|-------|-------|-------|-------|-------|-------|-------|-------|-------|-------|-------|-------|--------|---|--------|-------|
| Putative uncharacterized protein (Fragment)<br>OS=Ailuropoda melanoleuca<br>GN=PANDA_014933<br>PE=4 SV=1 | tr D2HS92 D2HS92_AILME | vkGD<br>VDV<br>SLPk       | 89% | 37.7 | 48.67155 | Ref | -1    | -0.34 | -0.42 | -0.042 | 0.052 | -0.58 | -0.4  | 4830  | 2060  | 3580  | 3810  | 5460  | 5090  | 3430  | 3860  | 1035  | 2068.3 | 2 | 0.0073 | 3.526 |
| Putative uncharacterized protein (Fragment)<br>OS=Ailuropoda melanoleuca<br>GN=PANDA_014933<br>PE=4 SV=1 | tr D2HS92 D2HS92_AILME | vQTP<br>EVD<br>Vk         | 90% | 41.6 | 51.48998 | Ref | -0.67 | -0.46 | -0.39 | -0.13  | -0.1  | -0.58 | -0.32 | 33700 | 17900 | 22500 | 26600 | 35000 | 31200 | 23400 | 27700 | 812   | 1621.9 | 2 | 0.0119 | 7.355 |
| Serotransferrin<br>OS=Bos taurus<br>GN=TF PE=2 SV=1                                                      | sp Q29443 TRFE_BOVIN   | cLM<br>EGA<br>GDV<br>AFVk | 95% | 56.4 | 53.08236 | Ref | 0.99  | 0.15  | 0.57  | 0.32   | -0.49 | 1     | 0.22  | 5890  | 10500 | 6370  | 9560  | 8820  | 4390  | 12900 | 7470  | 997.5 | 1993   | 2 | 0.0245 | 12.29 |
| Serotransferrin<br>OS=Bos taurus<br>GN=TF PE=2 SV=1                                                      | sp Q29443 TRFE_BOVIN   | cLM<br>EGA<br>GDV<br>AFVk | 95% | 51.8 | 53.26315 | Ref | 0.87  | 0.24  | 0.43  | 0.31   | 0.051 | 0.77  | 0.02  | 19700 | 23900 | 16800 | 21600 | 21900 | 15900 | 27400 | 16200 | 665.3 | 1993   | 3 | 0.0157 | 7.885 |
| Serotransferrin<br>OS=Bos taurus<br>GN=TF PE=2 SV=1                                                      | sp Q29443 TRFE_BOVIN   | cLM<br>EGA<br>GDV<br>AFVk | 95% | 69.7 | 53.07753 | Ref | 1     | -0.09 | 0.64  | 0.31   | -0.29 | 0.99  | 0.32  | 3340  | 6560  | 3330  | 6210  | 5440  | 3130  | 7940  | 4950  | 665.3 | 1993   | 3 | 0.0273 | 13.68 |

|                                                     |                              |                                 |     |      |          |     |      |      |      |      |       |      |       |       |        |       |       |       |       |       |       |       |        |   |        |       |
|-----------------------------------------------------|------------------------------|---------------------------------|-----|------|----------|-----|------|------|------|------|-------|------|-------|-------|--------|-------|-------|-------|-------|-------|-------|-------|--------|---|--------|-------|
| Serotransferrin<br>OS=Bos taurus<br>GN=TF PE=2 SV=1 | sp Q2944<br>3 TRFE_B<br>OVIN | cLM<br>EGA<br>GDV<br>AFVk       | 95% | 57   | 53.331   | Ref | 0.7  | 0.1  | 0.63 | 0.4  | 0.081 | 0.76 | 0.34  | 1730  | 2230   | 1610  | 2590  | 2450  | 1710  | 2850  | 2120  | 665.3 | 1993   | 3 | 0.0143 | 7.163 |
| Serotransferrin<br>OS=Bos taurus<br>GN=TF PE=2 SV=1 | sp Q2944<br>3 TRFE_B<br>OVIN | dNP<br>QTH<br>YYAV<br>AVV<br>k  | 63% | 35.9 | 54.33354 | Ref | 0.99 | 0.21 | 0.58 | 0.32 | -0.13 | 1    | -0.06 | 9460  | 18600  | 11700 | 17000 | 15700 | 10000 | 23200 | 10900 | 738.4 | 2212.2 | 3 | 0.0192 | 8.677 |
| Serotransferrin<br>OS=Bos taurus<br>GN=TF PE=2 SV=1 | sp Q2944<br>3 TRFE_B<br>OVIN | dNP<br>QTH<br>YYAV<br>AVV<br>k  | 92% | 48.6 | 54.33035 | Ref | 1    | 0.19 | 0.38 | 0.4  | 0.03  | 0.85 | 0.21  | 5770  | 10800  | 6700  | 8570  | 9560  | 6470  | 11900 | 7630  | 738.4 | 2212.2 | 3 | 0.0141 | 6.36  |
| Serotransferrin<br>OS=Bos taurus<br>GN=TF PE=2 SV=1 | sp Q2944<br>3 TRFE_B<br>OVIN | dNP<br>QTH<br>YYAV<br>AVV<br>k  | 69% | 37.3 | 54.32285 | Ref | 0.75 | 0.36 | 0.46 | 0.37 | 0.24  | 0.61 | 0.37  | 6650  | 9460   | 7850  | 9430  | 9770  | 7770  | 10500 | 8850  | 738.4 | 2212.2 | 3 | 0.0155 | 7.024 |
| Serotransferrin<br>OS=Bos taurus<br>GN=TF PE=2 SV=1 | sp Q2944<br>3 TRFE_B<br>OVIN | ecVP<br>nSNE<br>R               | 72% | 28.5 | 45.44836 | Ref | 0.97 | 0.22 | 0.57 | 0.34 | -0.24 | 0.92 | 0.18  | 59300 | 108000 | 69500 | 99700 | 94100 | 54600 | 1E+05 | 75800 | 699.8 | 1397.6 | 2 | 0.0107 | 7.661 |
| Serotransferrin<br>OS=Bos taurus<br>GN=TF PE=2 SV=1 | sp Q2944<br>3 TRFE_B<br>OVIN | eNFE<br>VLck                    | 95% | 48.8 | 52.52188 | Ref | 0.74 | 0.2  | 0.53 | 0.42 | -0.05 | 0.98 | 0.18  | 7500  | 10900  | 8060  | 11400 | 11700 | 7340  | 15600 | 8920  | 818.4 | 1634.9 | 2 | 0.0097 | 5.958 |
| Serotransferrin<br>OS=Bos taurus<br>GN=TF PE=2 SV=1 | sp Q2944<br>3 TRFE_B<br>OVIN | fDEF<br>FSAG<br>cAP<br>GSP<br>R | 95% | 56.9 | 47.81985 | Ref | 1    | 0.22 | 0.55 | 0.33 | -0.23 | 0.84 | 0.14  | 4250  | 7200   | 4530  | 6360  | 6030  | 3570  | 7820  | 4780  | 969.4 | 1936.9 | 2 | 0.0126 | 6.477 |



|                                                     |                              |                                    |     |      |          |     |                                         |                                            |                                                 |                                      |                                      |                                                 |                                      |                                      |                                         |                                            |                                                 |                                     |                                       |                                                 |                                      |       |        |   |        |       |
|-----------------------------------------------------|------------------------------|------------------------------------|-----|------|----------|-----|-----------------------------------------|--------------------------------------------|-------------------------------------------------|--------------------------------------|--------------------------------------|-------------------------------------------------|--------------------------------------|--------------------------------------|-----------------------------------------|--------------------------------------------|-------------------------------------------------|-------------------------------------|---------------------------------------|-------------------------------------------------|--------------------------------------|-------|--------|---|--------|-------|
| Serotransferrin<br>OS=Bos taurus<br>GN=TF PE=2 SV=1 | sp Q2944<br>3 TRFE_B<br>OVIN | fDEF<br>FSAG<br>cAP<br>GSP<br>R    | 95% | 62.4 | 47.8159  | Ref | 1.1                                     | 0.073                                      | 0.54                                            | 0.47                                 | -0.57                                | 1                                               | -0.03                                | 614                                  | 1120                                    | 613                                        | 952                                             | 999                                 | 423                                   | 1350                                            | 639                                  | 969.4 | 1936.9 | 2 | 0.0122 | 6.292 |
| Serotransferrin<br>OS=Bos taurus<br>GN=TF PE=2 SV=1 | sp Q2944<br>3 TRFE_B<br>OVIN | gDV<br>AFVK                        | 93% | 42.5 | 50.21019 | Ref | 0.94                                    | 0.13                                       | 0.62                                            | 0.47                                 | -0.27                                | 1                                               | -0.07                                | 1E+05                                | 230000                                  | 1E+05                                      | 224000                                          | 224000                              | 1E+05                                 | 3E+05                                           | 139000                               | 672.4 | 1342.8 | 2 | 0.0098 | 7.256 |
| Serotransferrin<br>OS=Bos taurus<br>GN=TF PE=2 SV=1 | sp Q2944<br>3 TRFE_B<br>OVIN | gEAD<br>AMS<br>LDG<br>GYLY<br>IAGK | 61% | 35.9 | 54.52795 | Ref | 0.82                                    | 0.22                                       | 0.58                                            | 0.37                                 | 0.15                                 | 0.56                                            | 0.22                                 | 2610                                 | 3370                                    | 2400                                       | 3470                                            | 3300                                | 2480                                  | 3440                                            | 2700                                 | 813.8 | 2438.2 | 3 | 0.0239 | 9.784 |
| Serotransferrin<br>OS=Bos taurus<br>GN=TF PE=2 SV=1 | sp Q2944<br>3 TRFE_B<br>OVIN | gEAD<br>AMS<br>LDG<br>GYLY<br>IAGK | 65% | 36.6 | 54.61601 | Ref | Reference<br>Missing<br>(1.3384<br>217) | No<br>Value<br>s (-<br>0.842<br>44597<br>) | Refer<br>ence<br>Missi<br>ng<br>(1.160<br>1716) | No<br>Values<br>(-<br>1.1495<br>199) | No<br>Values<br>(-<br>0.9536<br>475) | Refer<br>ence<br>Missi<br>ng<br>(1.746<br>6938) | No<br>Values<br>(-<br>1.0055<br>403) | No<br>Values<br>(-<br>0.9271<br>425) | Reference<br>Missing<br>(1.338421<br>7) | No<br>Value<br>s (-<br>0.842<br>44597<br>) | Refer<br>ence<br>Missi<br>ng<br>(1.1601<br>716) | No<br>Values<br>(-<br>1.149519<br>) | No<br>Value<br>s (-<br>0.953<br>6475) | Refer<br>ence<br>Missi<br>ng<br>(1.746<br>6938) | No<br>Values<br>(-<br>1.005540<br>3) | 813.8 | 2438.2 | 3 | 0.0191 | 7.828 |
| Serotransferrin<br>OS=Bos taurus<br>GN=TF PE=2 SV=1 | sp Q2944<br>3 TRFE_B<br>OVIN | gEAD<br>AmS<br>LDG<br>GYLY<br>IAGK | 95% | 60.2 | 54.36261 | Ref | 0.82                                    | 0.2                                        | 0.41                                            | 0.34                                 | 0.014                                | 0.88                                            | 0.21                                 | 4460                                 | 5940                                    | 4190                                       | 5470                                            | 5710                                | 3990                                  | 7610                                            | 4750                                 | 819.1 | 2454.2 | 3 | 0.0217 | 8.845 |
| Serotransferrin<br>OS=Bos taurus<br>GN=TF PE=2 SV=1 | sp Q2944<br>3 TRFE_B<br>OVIN | gPN<br>HAV<br>VSR                  | 77% | 35.1 | 50.86758 | Ref | 0.87                                    | 0.26                                       | 0.62                                            | 0.34                                 | -0.04                                | 0.87                                            | 0.18                                 | 3540                                 | 6170                                    | 4400                                       | 6330                                            | 5740                                | 3850                                  | 7590                                            | 4660                                 | 620.9 | 1239.7 | 2 | 0.0105 | 8.446 |
| Serotransferrin<br>OS=Bos taurus<br>GN=TF PE=2 SV=1 | sp Q2944<br>3 TRFE_B<br>OVIN | gPN<br>HAV<br>VSR                  | 60% | 31.9 | 50.89619 | Ref | 0.55                                    | 0.36                                       | 0.61                                            | 0.32                                 | 0.32                                 | 0.74                                            | 0.3                                  | 20500                                | 26300                                   | 25000                                      | 33400                                           | 30100                               | 26100                                 | 36500                                           | 26800                                | 414.2 | 1239.7 | 3 | 0.0093 | 7.524 |

|                                                     |                              |                   |     |      |          |     |      |       |      |      |       |      |       |       |        |       |        |        |       |       |        |       |        |   |        |       |
|-----------------------------------------------------|------------------------------|-------------------|-----|------|----------|-----|------|-------|------|------|-------|------|-------|-------|--------|-------|--------|--------|-------|-------|--------|-------|--------|---|--------|-------|
| Serotransferrin<br>OS=Bos taurus<br>GN=TF PE=2 SV=1 | sp Q2944<br>3 TRFE_B<br>OVIN | gPN<br>HAV<br>VSR | 84% | 37.8 | 50.96861 | Ref | 0.79 | 0.3   | 0.62 | 0.35 | 0.003 | 0.93 | 0.12  | 12000 | 20000  | 15400 | 21700  | 19800  | 13600 | 26900 | 15300  | 620.9 | 1239.7 | 2 | 0.011  | 8.833 |
| Serotransferrin<br>OS=Bos taurus<br>GN=TF PE=2 SV=1 | sp Q2944<br>3 TRFE_B<br>OVIN | gPN<br>HAV<br>VSR | 77% | 35.4 | 50.87143 | Ref | 0.86 | 0.17  | 0.63 | 0.3  | -0.07 | 0.94 | 0.094 | 32000 | 50000  | 33700 | 52000  | 45500  | 30800 | 64600 | 35700  | 620.9 | 1239.7 | 2 | 0.01   | 8.043 |
| Serotransferrin<br>OS=Bos taurus<br>GN=TF PE=2 SV=1 | sp Q2944<br>3 TRFE_B<br>OVIN | gPN<br>HAV<br>VSR | 90% | 42.8 | 50.84222 | Ref | 0.57 | 0.29  | 0.63 | 0.26 | 0.19  | 0.87 | 0.33  | 1E+05 | 142000 | 1E+05 | 180000 | 154000 | 1E+05 | 2E+05 | 146000 | 414.2 | 1239.7 | 3 | 0.0092 | 7.379 |
| Serotransferrin<br>OS=Bos taurus<br>GN=TF PE=2 SV=1 | sp Q2944<br>3 TRFE_B<br>OVIN | gYLA<br>VAV<br>Vk | 95% | 49.6 | 47.06086 | Ref | 1.1  | -0.18 | 0.5  | 0.4  | -0.15 | 1.1  | 0.045 | 15800 | 34800  | 15300 | 27600  | 28200  | 16900 | 40800 | 20000  | 510   | 1527   | 3 | 0.0052 | 3.375 |
| Serotransferrin<br>OS=Bos taurus<br>GN=TF PE=2 SV=1 | sp Q2944<br>3 TRFE_B<br>OVIN | gYLA<br>VAV<br>Vk | 85% | 35.6 | 46.97778 | Ref | 0.79 | 0.012 | 0.45 | 0.26 | 0.18  | 0.91 | 0.22  | 3910  | 4930   | 3120  | 4740   | 4580   | 3790  | 6550  | 4040   | 510   | 1527   | 3 | 0.0039 | 2.531 |
| Serotransferrin<br>OS=Bos taurus<br>GN=TF PE=2 SV=1 | sp Q2944<br>3 TRFE_B<br>OVIN | gYLA<br>VAV<br>Vk | 94% | 46.5 | 48.7458  | Ref | 1.1  | 0.33  | 0.49 | 0.29 | -0.24 | 0.91 | -0.04 | 7840  | 16300  | 10300 | 12900  | 12300  | 7480  | 17400 | 8930   | 510   | 1526.9 | 3 | 0.0248 | 16.26 |
| Serotransferrin<br>OS=Bos taurus<br>GN=TF PE=2 SV=1 | sp Q2944<br>3 TRFE_B<br>OVIN | gYLA<br>VAV<br>Vk | 95% | 53.4 | 47.22634 | Ref | 0.87 | 0.29  | 0.57 | 0.45 | -0.2  | 0.95 | 0.043 | 9400  | 16200  | 11700 | 16000  | 16200  | 9030  | 20900 | 11100  | 764.5 | 1527   | 2 | 0.0078 | 5.093 |

|                                                     |                              |                            |     |      |          |     |      |       |      |      |       |      |       |       |       |       |       |       |       |       |       |       |        |   |        |       |
|-----------------------------------------------------|------------------------------|----------------------------|-----|------|----------|-----|------|-------|------|------|-------|------|-------|-------|-------|-------|-------|-------|-------|-------|-------|-------|--------|---|--------|-------|
| Serotransferrin<br>OS=Bos taurus<br>GN=TF PE=2 SV=1 | sp Q2944<br>3 TRFE_B<br>OVIN | gYLA<br>VAV<br>Vk          | 92% | 40.9 | 46.54889 | Ref | 0.68 | 0.093 | 0.52 | 0.47 | 0.19  | 0.73 | 0.28  | 5930  | 6990  | 5050  | 7620  | 8090  | 5830  | 8860  | 6420  | 510   | 1527   | 3 | 0.0021 | 1.356 |
| Serotransferrin<br>OS=Bos taurus<br>GN=TF PE=2 SV=1 | sp Q2944<br>3 TRFE_B<br>OVIN | gYLA<br>VAV<br>Vk          | 74% | 31.1 | 46.8985  | Ref | 0.67 | 0.32  | 0.41 | 0.34 | 0.28  | 0.62 | 0.36  | 2160  | 2510  | 2140  | 2550  | 2670  | 2240  | 2950  | 2460  | 510   | 1527   | 3 | #####  | 0.1   |
| Serotransferrin<br>OS=Bos taurus<br>GN=TF PE=2 SV=1 | sp Q2944<br>3 TRFE_B<br>OVIN | GyLA<br>VAV<br>Vk          | 55% | 26.9 | 46.70237 | Ref | 0.57 | 0.2   | 0.66 | 0.47 | 0.25  | 0.77 | 0.087 | 444   | 516   | 434   | 671   | 647   | 483   | 724   | 449   | 510   | 1527   | 3 | 0.0012 | 0.784 |
| Serotransferrin<br>OS=Bos taurus<br>GN=TF PE=2 SV=1 | sp Q2944<br>3 TRFE_B<br>OVIN | gyLA<br>VAV<br>Vk          | 54% | 23.1 | 44.86176 | Ref | 0.87 | -0.03 | 0.62 | 0.46 | -0.1  | 0.91 | 0.066 | 7770  | 11300 | 6550  | 11600 | 11400 | 6770  | 14200 | 7860  | 458.8 | 1831.2 | 4 | 0.0077 | 4.2   |
| Serotransferrin<br>OS=Bos taurus<br>GN=TF PE=2 SV=1 | sp Q2944<br>3 TRFE_B<br>OVIN | hSTV<br>FDNL<br>PNPE<br>DR | 90% | 44.6 | 52.08704 | Ref | 0.77 | 0.23  | 0.41 | 0.37 | 0.36  | 0.55 | 0.26  | 7030  | 8530  | 6400  | 8140  | 8730  | 7560  | 8980  | 7290  | 649   | 1944   | 3 | 0.0135 | 6.924 |
| Serotransferrin<br>OS=Bos taurus<br>GN=TF PE=2 SV=1 | sp Q2944<br>3 TRFE_B<br>OVIN | iLES<br>GPF<br>VScV<br>k   | 57% | 34.2 | 53.61836 | Ref | 0.99 | 0.25  | 0.78 | 0.31 | -0.57 | 1    | -0.1  | 13300 | 25300 | 16500 | 26800 | 21300 | 10100 | 31600 | 14500 | 645   | 1932.1 | 3 | 0.0164 | 8.491 |
| Serotransferrin<br>OS=Bos taurus<br>GN=TF PE=2 SV=1 | sp Q2944<br>3 TRFE_B<br>OVIN | iLES<br>GPF<br>VScV<br>k   | 92% | 47.5 | 53.57346 | Ref | 1.1  | -0    | 0.7  | 0.35 | -0.77 | 1.1  | 0.18  | 3490  | 7850  | 3980  | 7250  | 6300  | 2520  | 9380  | 5060  | 645   | 1932.1 | 3 | 0.0104 | 5.356 |

|                                                     |                              |                                                |     |      |          |     |      |       |      |      |       |      |       |       |        |       |        |        |       |       |        |       |        |   |        |       |
|-----------------------------------------------------|------------------------------|------------------------------------------------|-----|------|----------|-----|------|-------|------|------|-------|------|-------|-------|--------|-------|--------|--------|-------|-------|--------|-------|--------|---|--------|-------|
| Serotransferrin<br>OS=Bos taurus<br>GN=TF PE=2 SV=1 | sp Q2944<br>3 TRFE_B<br>OVIN | iLES<br>GPF<br>VScV<br>k                       | 80% | 39.7 | 53.5998  | Ref | 0.87 | 0.038 | 0.79 | 0.42 | -0.19 | 0.91 | 0.11  | 804   | 1410   | 861   | 1630   | 1390   | 797   | 1780  | 1010   | 645   | 1932.1 | 3 | 0.0137 | 7.063 |
| Serotransferrin<br>OS=Bos taurus<br>GN=TF PE=2 SV=1 | sp Q2944<br>3 TRFE_B<br>OVIN | kNYE<br>LLcG<br>DNT<br>R                       | 92% | 48.5 | 53.75581 | Ref | 1.1  | 0.028 | 0.55 | 0.48 | -0.28 | 0.89 | 0.11  | 18200 | 35400  | 18700 | 30200  | 31700  | 16400 | 38300 | 22200  | 694   | 2079.1 | 3 | 0.0118 | 5.693 |
| Serotransferrin<br>OS=Bos taurus<br>GN=TF PE=2 SV=1 | sp Q2944<br>3 TRFE_B<br>OVIN | kPVT<br>DAE<br>NcHL<br>AR                      | 95% | 93.7 | 54.21559 | Ref | 0.75 | 0.25  | 0.6  | 0.44 | -0.15 | 0.92 | 0.21  | 1E+05 | 188000 | 1E+05 | 207000 | 204000 | 1E+05 | 3E+05 | 157000 | 527.8 | 2107.1 | 4 | 0.016  | 7.594 |
| Serotransferrin<br>OS=Bos taurus<br>GN=TF PE=2 SV=1 | sp Q2944<br>3 TRFE_B<br>OVIN | kPVT<br>DAE<br>ncHL<br>AR                      | 80% | 40   | 53.84613 | Ref | 0.69 | 0.28  | 0.52 | 0.42 | 0.18  | 0.71 | 0.22  | 10600 | 13100  | 10700 | 14100  | 14500  | 10700 | 16200 | 11500  | 703.7 | 2108.1 | 3 | 0.0197 | 9.338 |
| Serotransferrin<br>OS=Bos taurus<br>GN=TF PE=2 SV=1 | sp Q2944<br>3 TRFE_B<br>OVIN | kSVD<br>DYQ<br>EcYL<br>AMV<br>PSH<br>AVV<br>AR | 89% | 44.3 | 55.41418 | Ref | 0.73 | 0.34  | 0.38 | 0.44 | 0.098 | 0.73 | 0.27  | 503   | 635    | 526   | 608    | 696    | 480   | 778   | 562    | 784.6 | 3134.6 | 4 | 0.0155 | 4.948 |
| Serotransferrin<br>OS=Bos taurus<br>GN=TF PE=2 SV=1 | sp Q2944<br>3 TRFE_B<br>OVIN | kTYD<br>SYLG<br>DDY<br>VR                      | 81% | 40.6 | 54.04171 | Ref | 0.66 | 0.36  | 0.51 | 0.46 | 0.33  | 0.68 | 0.12  | 14500 | 18600  | 16400 | 20500  | 21800  | 17400 | 23200 | 15600  | 735   | 2202.1 | 3 | 0.0185 | 8.418 |
| Serotransferrin<br>OS=Bos taurus<br>GN=TF PE=2 SV=1 | sp Q2944<br>3 TRFE_B<br>OVIN | kTYD<br>SYLG<br>DDY<br>VR                      | 76% | 36.9 | 54.04002 | Ref | 0.75 | 0.34  | 0.34 | 0.51 | 0.12  | 1.2  | 0.014 | 15600 | 35300  | 28900 | 32200  | 40000  | 26800 | 58600 | 25700  | 551.5 | 2202.1 | 4 | 0.0182 | 8.253 |

|                                                     |                              |                           |     |      |          |     |      |       |      |      |       |      |       |       |       |       |        |       |       |       |       |       |        |   |        |       |
|-----------------------------------------------------|------------------------------|---------------------------|-----|------|----------|-----|------|-------|------|------|-------|------|-------|-------|-------|-------|--------|-------|-------|-------|-------|-------|--------|---|--------|-------|
| Serotransferrin<br>OS=Bos taurus<br>GN=TF PE=2 SV=1 | sp Q2944<br>3 TRFE_B<br>OVIN | kTYD<br>SYLG<br>DDY<br>VR | 87% | 43.8 | 54.07889 | Ref | 0.66 | 0.33  | 0.52 | 0.49 | 0.019 | 0.74 | 0.2   | 6300  | 7510  | 6460  | 8300   | 8930  | 5630  | 9650  | 6630  | 735   | 2202.1 | 3 | 0.0167 | 7.587 |
| Serotransferrin<br>OS=Bos taurus<br>GN=TF PE=2 SV=1 | sp Q2944<br>3 TRFE_B<br>OVIN | lcQL<br>cAGk              | 75% | 35.6 | 51.65194 | Ref | 1    | 0.059 | 0.63 | 0.23 | -0.2  | 0.91 | 0.19  | 2380  | 4290  | 2390  | 3980   | 3320  | 2160  | 4860  | 2910  | 768.4 | 1534.8 | 2 | 0.0089 | 5.791 |
| Serotransferrin<br>OS=Bos taurus<br>GN=TF PE=2 SV=1 | sp Q2944<br>3 TRFE_B<br>OVIN | ILEAc<br>TFHK<br>P        | 58% | 34.5 | 53.88741 | Ref | 0.7  | 0.25  | 0.71 | 0.35 | -0.1  | 0.88 | 0.22  | 3060  | 4300  | 3410  | 5270   | 4530  | 2890  | 5960  | 3750  | 605   | 1812   | 3 | 0.0147 | 8.102 |
| Serotransferrin<br>OS=Bos taurus<br>GN=TF PE=2 SV=1 | sp Q2944<br>3 TRFE_B<br>OVIN | ILEAc<br>TFHK<br>P        | 92% | 46   | 53.98067 | Ref | 0.85 | 0.1   | 0.75 | 0.44 | -0.18 | 0.92 | 0.008 | 1590  | 2530  | 1640  | 2880   | 2560  | 1450  | 3240  | 1720  | 907   | 1812   | 2 | 0.0127 | 6.99  |
| Serotransferrin<br>OS=Bos taurus<br>GN=TF PE=2 SV=1 | sp Q2944<br>3 TRFE_B<br>OVIN | ILEAc<br>TFHK<br>P        | 60% | 35.1 | 53.98747 | Ref | 0.64 | 0.013 | 0.95 | 0.3  | -0.11 | 0.93 | 0.26  | 56000 | 83000 | 58400 | 126000 | 88000 | 58000 | 1E+05 | 77700 | 605   | 1812   | 3 | 0.0125 | 6.894 |
| Serotransferrin<br>OS=Bos taurus<br>GN=TF PE=2 SV=1 | sp Q2944<br>3 TRFE_B<br>OVIN | ILEAc<br>TFHK<br>P        | 87% | 44   | 53.90485 | Ref | 0.69 | 0.28  | 0.69 | 0.37 | 0.025 | 0.74 | 0.27  | 1610  | 2150  | 1750  | 2620   | 2300  | 1590  | 2720  | 1960  | 605   | 1812   | 3 | 0.007  | 3.866 |
| Serotransferrin<br>OS=Bos taurus<br>GN=TF PE=2 SV=1 | sp Q2944<br>3 TRFE_B<br>OVIN | ILEAc<br>TFHK<br>P        | 60% | 35   | 53.96886 | Ref | 0.71 | 0.15  | 0.91 | 0.32 | -0.3  | 0.91 | 0.14  | 12100 | 16700 | 12300 | 23300  | 17100 | 9720  | 23400 | 13700 | 605   | 1812   | 3 | 0.0096 | 5.273 |

|                                                     |                              |                                               |     |      |          |     |      |       |      |      |       |      |       |       |       |       |       |       |       |       |       |       |        |   |        |       |
|-----------------------------------------------------|------------------------------|-----------------------------------------------|-----|------|----------|-----|------|-------|------|------|-------|------|-------|-------|-------|-------|-------|-------|-------|-------|-------|-------|--------|---|--------|-------|
| Serotransferrin<br>OS=Bos taurus<br>GN=TF PE=2 SV=1 | sp Q2944<br>3 TRFE_B<br>OVIN | ILEAc<br>TFHK<br>P                            | 91% | 44.9 | 53.9043  | Ref | 0.76 | 0.11  | 0.66 | 0.4  | -0.06 | 0.98 | 0.078 | 1220  | 1800  | 1240  | 2030  | 1870  | 1190  | 2560  | 1360  | 907   | 1812   | 2 | 0.0071 | 3.89  |
| Serotransferrin<br>OS=Bos taurus<br>GN=TF PE=2 SV=1 | sp Q2944<br>3 TRFE_B<br>OVIN | ILEAc<br>TFHK<br>P                            | 72% | 37.7 | 53.90621 | Ref | 0.77 | -0.09 | 0.83 | 0.5  | -0    | 0.76 | -0.04 | 753   | 946   | 568   | 1200  | 1060  | 650   | 1150  | 655   | 605   | 1812   | 3 | 0.003  | 1.649 |
| Serotransferrin<br>OS=Bos taurus<br>GN=TF PE=2 SV=1 | sp Q2944<br>3 TRFE_B<br>OVIN | sVD<br>DYQ<br>EcYL<br>AMV<br>PSH<br>AVV<br>AR | 95% | 58.1 | 52.73266 | Ref | 0.78 | 0.13  | 0.22 | 0.51 | 0.23  | 0.92 | 0.27  | 933   | 1390  | 957   | 1150  | 1550  | 1110  | 1870  | 1180  | 901.8 | 2702.3 | 3 | 0.0043 | 1.602 |
| Serotransferrin<br>OS=Bos taurus<br>GN=TF PE=2 SV=1 | sp Q2944<br>3 TRFE_B<br>OVIN | tSDA<br>NIN<br>WN<br>NLk                      | 64% | 35.8 | 53.90113 | Ref | 0.96 | 0.044 | 0.44 | 0.51 | -0.03 | 0.83 | 0.13  | 15800 | 25300 | 14500 | 21400 | 24800 | 14900 | 28200 | 17200 | 666.7 | 1997.1 | 3 | 0.011  | 5.516 |
| Serotransferrin<br>OS=Bos taurus<br>GN=TF PE=2 SV=1 | sp Q2944<br>3 TRFE_B<br>OVIN | tSDA<br>NIN<br>WnN<br>Lk                      | 95% | 57.6 | 53.89657 | Ref | 1.1  | -0.02 | 0.6  | 0.33 | -0.33 | 1    | -0    | 10800 | 23800 | 11500 | 19900 | 18200 | 10000 | 26800 | 13100 | 1000  | 1998.1 | 2 | 0.0127 | 6.34  |
| Serotransferrin<br>OS=Bos taurus<br>GN=TF PE=2 SV=1 | sp Q2944<br>3 TRFE_B<br>OVIN | tYDS<br>YLGD<br>DYV<br>R                      | 95% | 53   | 49.52396 | Ref | 0.89 | 0.26  | 0.47 | 0.49 | -0.03 | 0.84 | 0.25  | 46000 | 86700 | 60800 | 78600 | 88000 | 53400 | 1E+05 | 67500 | 885.9 | 1769.8 | 2 | 0.0152 | 8.604 |
| Serotransferrin<br>OS=Bos taurus<br>GN=TF PE=2 SV=1 | sp Q2944<br>3 TRFE_B<br>OVIN | tYDS<br>YLGD<br>DYV<br>R                      | 95% | 44.1 | 49.40317 | Ref | 0.62 | 0.17  | 0.55 | 0.5  | 0.053 | 0.91 | 0.3   | 2010  | 2720  | 2160  | 3160  | 3370  | 2150  | 4060  | 2650  | 885.9 | 1769.8 | 2 | 0.0179 | 10.12 |

|                                                                     |                                |                           |     |      |          |     |        |       |       |       |       |       |       |       |       |       |       |       |       |       |       |       |        |   |        |       |
|---------------------------------------------------------------------|--------------------------------|---------------------------|-----|------|----------|-----|--------|-------|-------|-------|-------|-------|-------|-------|-------|-------|-------|-------|-------|-------|-------|-------|--------|---|--------|-------|
| Serotransferrin<br>OS=Bos taurus<br>GN=TF PE=2 SV=1                 | sp Q2944<br>3 TRFE_B<br>OVIN   | wcAI<br>GHQ<br>ER         | 67% | 31.4 | 48.88387 | Ref | 0.84   | 0.044 | 0.63  | 0.25  | 0.27  | 0.78  | 0.2   | 10900 | 16300 | 10200 | 17100 | 14600 | 12900 | 19200 | 12700 | 483.9 | 1448.7 | 3 | 0.0098 | 6.748 |
| Serotransferrin<br>OS=Bos taurus<br>GN=TF PE=2 SV=1                 | sp Q2944<br>3 TRFE_B<br>OVIN   | wcAI<br>GHQ<br>ER         | 88% | 39.4 | 48.89134 | Ref | 1.1    | 0.002 | 0.72  | 0.22  | -0.41 | 1     | -0.06 | 39600 | 73900 | 37800 | 69600 | 54600 | 30700 | 86300 | 40700 | 483.9 | 1448.7 | 3 | 0.0093 | 6.438 |
| Serotransferrin<br>OS=Bos taurus<br>GN=TF PE=2 SV=1                 | sp Q2944<br>3 TRFE_B<br>OVIN   | wcAI<br>GHQ<br>ER         | 63% | 30.7 | 49.06567 | Ref | 0.68   | 0.34  | 0.56  | 0.25  | 0.32  | 0.57  | 0.37  | 5470  | 6870  | 5920  | 7710  | 6890  | 6310  | 7850  | 6760  | 483.9 | 1448.7 | 3 | 0.0056 | 3.851 |
| Uncharacterized<br>protein OS=Bos<br>taurus GN=Bt.3071<br>PE=4 SV=1 | tr F1ME6<br>5 F1ME6<br>5_BOVIN | aEES<br>AAH<br>LPEEI<br>R | 78% | 38.5 | 52.96837 | Ref | -0.13  | -0.15 | -0.16 | -0.29 | -0.11 | -0.29 | -0.12 | 10100 | 8290  | 8890  | 9910  | 9970  | 9850  | 9100  | 10200 | 586   | 1754.9 | 3 | 0.0097 | 5.526 |
| Uncharacterized<br>protein OS=Bos<br>taurus GN=Bt.3071<br>PE=4 SV=1 | tr F1ME6<br>5 F1ME6<br>5_BOVIN | aSVG<br>QVE<br>SDLK       | 95% | 75.7 | 52.8841  | Ref | -0.34  | -0.03 | 0.034 | -0.11 | -0.19 | -0.41 | -0.35 | 19100 | 12900 | 17300 | 20300 | 20300 | 16700 | 15100 | 15600 | 871   | 1740   | 2 | 0.0158 | 9.098 |
| Uncharacterized<br>protein OS=Bos<br>taurus GN=Bt.3071<br>PE=4 SV=1 | tr F1ME6<br>5 F1ME6<br>5_BOVIN | dFTS<br>LENT<br>VEER      | 90% | 41.5 | 51.31795 | Ref | -0.009 | 0.035 | -0.23 | -0.15 | -0.32 | -0.4  | -0.42 | 5760  | 4660  | 5220  | 4880  | 5680  | 4420  | 4360  | 4270  | 872.4 | 1742.8 | 2 | 0.0136 | 7.821 |
| Uncharacterized<br>protein OS=Bos<br>taurus GN=Bt.3071<br>PE=4 SV=1 | tr F1ME6<br>5 F1ME6<br>5_BOVIN | dFTS<br>LENT<br>VEER      | 95% | 51.4 | 51.34489 | Ref | -0.25  | -0.1  | -0.1  | -0.16 | -0.35 | -0.28 | -0.41 | 9430  | 5790  | 6970  | 7800  | 8270  | 6320  | 6930  | 6290  | 872.4 | 1742.9 | 2 | 0.0123 | 7.053 |

|                                                            |                        |                               |     |      |          |     |        |       |       |        |       |       |       |       |       |       |       |       |       |       |       |       |        |   |        |       |
|------------------------------------------------------------|------------------------|-------------------------------|-----|------|----------|-----|--------|-------|-------|--------|-------|-------|-------|-------|-------|-------|-------|-------|-------|-------|-------|-------|--------|---|--------|-------|
| Uncharacterized protein OS=Bos taurus GN=Bt.3071 PE=4 SV=1 | tr F1ME65 F1ME65_BOVIN | eELG<br>QGL<br>QGV<br>EQk     | 92% | 48.2 | 53.90889 | Ref | -0.057 | -0.12 | -0.2  | -0.25  | -0.29 | -0.16 | -0.51 | 40600 | 29600 | 30800 | 32700 | 34700 | 29500 | 33800 | 26300 | 675   | 2022.1 | 3 | 0.0144 | 7.108 |
| Uncharacterized protein OS=Bos taurus GN=Bt.3071 PE=4 SV=1 | tr F1ME65 F1ME65_BOVIN | eRDF<br>TSLE<br>NTV<br>EER    | 91% | 43.3 | 52.36499 | Ref | -0.38  | -0.06 | -0.22 | -0.027 | -0.18 | -0.33 | -0.29 | 1510  | 928   | 1260  | 1260  | 1590  | 1250  | 1170  | 1200  | 1015  | 2028   | 2 | 0.0176 | 8.652 |
| Uncharacterized protein OS=Bos taurus GN=Bt.3071 PE=4 SV=1 | tr F1ME65 F1ME65_BOVIN | eSQ<br>GLDS<br>R              | 72% | 32.6 | 49.33781 | Ref | -0.39  | -0.09 | -0.06 | -0.16  | -0.23 | -0.26 | -0.26 | 94500 | 59100 | 79100 | 90500 | 93000 | 77100 | 79100 | 78600 | 598.3 | 1194.6 | 2 | 0.0105 | 8.757 |
| Uncharacterized protein OS=Bos taurus GN=Bt.3071 PE=4 SV=1 | tr F1ME65 F1ME65_BOVIN | eSQ<br>GLDS<br>R              | 63% | 31   | 49.41079 | Ref | -0.25  | -0.13 | -0.04 | -0.34  | 0.034 | -0.31 | -0.15 | 15100 | 12300 | 14400 | 17300 | 15500 | 17500 | 14400 | 16000 | 399.2 | 1194.6 | 3 | 0.0095 | 7.942 |
| Uncharacterized protein OS=Bos taurus GN=Bt.3071 PE=4 SV=1 | tr F1ME65 F1ME65_BOVIN | gAH<br>PSG<br>GAD<br>DVA<br>k | 65% | 35.2 | 53.08426 | Ref | -0.3   | -0.25 | -0.37 | -0.12  | -0.06 | -0.22 | 0.073 | 16300 | 12300 | 13800 | 14200 | 18700 | 17100 | 15900 | 19400 | 597.3 | 1788.9 | 3 | 0.0249 | 13.94 |
| Uncharacterized protein OS=Bos taurus GN=Bt.3071 PE=4 SV=1 | tr F1ME65 F1ME65_BOVIN | gGH<br>GAA<br>SPSE<br>k       | 77% | 37.8 | 52.57295 | Ref | -0.1   | -0.15 | -0.12 | -0.19  | -0.11 | -0.31 | -0.17 | 7930  | 7140  | 7480  | 8600  | 9000  | 8310  | 7570  | 8260  | 536   | 1604.9 | 3 | 0.0203 | 12.65 |



|                                                            |                        |                                   |     |      |          |     |       |       |       |        |       |       |       |       |       |       |       |       |       |       |       |       |        |   |        |       |
|------------------------------------------------------------|------------------------|-----------------------------------|-----|------|----------|-----|-------|-------|-------|--------|-------|-------|-------|-------|-------|-------|-------|-------|-------|-------|-------|-------|--------|---|--------|-------|
| Uncharacterized protein OS=Bos taurus GN=Bt.3071 PE=4 SV=1 | tr F1ME65 F1ME65_BOVIN | gGH<br>GAA<br>SPSE<br>k           | 95% | 52.8 | 52.79649 | Ref | -0.13 | -0.09 | -0.27 | -0.083 | -0.08 | -0.42 | -0.23 | 20300 | 16500 | 18300 | 18100 | 22800 | 20000 | 16500 | 18700 | 536   | 1604.9 | 3 | 0.0086 | 5.348 |
| Uncharacterized protein OS=Bos taurus GN=Bt.3071 PE=4 SV=1 | tr F1ME65 F1ME65_BOVIN | gGH<br>GAA<br>SPSE<br>k           | 51% | 32.3 | 52.79471 | Ref | -0.23 | -0.1  | -0.33 | -0.19  | -0.15 | -0.36 | 0.064 | 12900 | 9840  | 11700 | 11200 | 13600 | 12200 | 11100 | 14700 | 536   | 1604.9 | 3 | 0.0084 | 5.236 |
| Uncharacterized protein OS=Bos taurus GN=Bt.3071 PE=4 SV=1 | tr F1ME65 F1ME65_BOVIN | gLGE<br>AQLS<br>LAG<br>DVD<br>Elk | 95% | 67.6 | 54.32064 | Ref | -0.36 | -0.25 | -0.1  | -0.1   | -0.16 | -0.19 | -0.18 | 12300 | 8170  | 9600  | 11900 | 13100 | 11000 | 11300 | 11300 | 775.1 | 2322.3 | 3 | 0.0225 | 9.694 |
| Uncharacterized protein OS=Bos taurus GN=Bt.3071 PE=4 SV=1 | tr F1ME65 F1ME65_BOVIN | gLGE<br>AQLS<br>LAG<br>DVD<br>Elk | 95% | 57.2 | 54.28412 | Ref | -0.26 | -0.26 | -0.05 | -0.25  | 0.12  | -0.43 | -0.2  | 6070  | 4540  | 4930  | 6400  | 6110  | 6900  | 4940  | 5720  | 775.1 | 2322.3 | 3 | 0.0176 | 7.563 |
| Uncharacterized protein OS=Bos taurus GN=Bt.3071 PE=4 SV=1 | tr F1ME65 F1ME65_BOVIN | gLGE<br>AQLS<br>LAG<br>DVD<br>Elk | 87% | 43.9 | 54.18303 | Ref | -0.3  | -0.38 | -0.06 | -0.22  | -0.09 | -0.02 | -0.07 | 1500  | 1220  | 1250  | 1740  | 1720  | 1640  | 1800  | 1730  | 775.1 | 2322.3 | 3 | 0.0128 | 5.51  |
| Uncharacterized protein OS=Bos taurus GN=Bt.3071 PE=4 SV=1 | tr F1ME65 F1ME65_BOVIN | gLGE<br>AQLS<br>LAG<br>DVD<br>Elk | 94% | 51   | 54.18764 | Ref | -0.35 | -0.18 | -0.09 | -0.062 | -0.13 | -0.31 | -0.28 | 17600 | 11500 | 14000 | 16800 | 18900 | 15800 | 14500 | 14700 | 827.1 | 2478.4 | 3 | 0.0178 | 7.161 |

|                                                            |                        |                 |     |      |          |     |       |       |       |        |       |       |       |       |       |       |       |       |       |       |       |       |        |   |        |       |
|------------------------------------------------------------|------------------------|-----------------|-----|------|----------|-----|-------|-------|-------|--------|-------|-------|-------|-------|-------|-------|-------|-------|-------|-------|-------|-------|--------|---|--------|-------|
| Uncharacterized protein OS=Bos taurus GN=Bt.3071 PE=4 SV=1 | tr F1ME65 F1ME65_BOVIN | iETN ENN LESA k | 95% | 73.1 | 53.9869  | Ref | -0.66 | -0.17 | -0.08 | -0.016 | -0.1  | -0.4  | -0.21 | 25400 | 12300 | 18700 | 22500 | 25800 | 21300 | 18100 | 20500 | 985.5 | 1969   | 2 | 0.0129 | 6.56  |
| Uncharacterized protein OS=Bos taurus GN=Bt.3071 PE=4 SV=1 | tr F1ME65 F1ME65_BOVIN | iETn ENN LESA k | 93% | 49.7 | 53.67427 | Ref | -0.14 | -0.2  | -0.18 | -0.38  | -0.27 | -0.03 | -0.13 | 17800 | 14100 | 14600 | 16700 | 16000 | 15100 | 18700 | 17300 | 657.7 | 1970   | 3 | 0.0165 | 8.39  |
| Uncharacterized protein OS=Bos taurus GN=Bt.3071 PE=4 SV=1 | tr F1ME65 F1ME65_BOVIN | iETN EnNL ESAK  | 95% | 55.9 | 53.6849  | Ref | -0.55 | -0.1  | 0.044 | -0.048 | -0.19 | -0.29 | -0.36 | 10900 | 6050  | 8980  | 11100 | 11500 | 9090  | 8850  | 8410  | 986   | 1970   | 2 | 0.0148 | 7.484 |
| Uncharacterized protein OS=Bos taurus GN=Bt.3071 PE=4 SV=1 | tr F1ME65 F1ME65_BOVIN | iETN EnNL ESAK  | 95% | 53.8 | 53.69086 | Ref | -0.39 | -0.18 | -0.19 | -0.028 | -0.12 | -0.16 | -0.18 | 6500  | 4530  | 5670  | 6320  | 7810  | 6400  | 6500  | 6380  | 986   | 1970   | 2 | 0.013  | 6.612 |
| Uncharacterized protein OS=Bos taurus GN=Bt.3071 PE=4 SV=1 | tr F1ME65 F1ME65_BOVIN | IQNE ILK        | 80% | 35   | 49.58339 | Ref | -0.29 | -0.15 | 0.004 | -0.15  | -0.18 | -0.39 | -0.3  | 52500 | 35100 | 41900 | 52300 | 51800 | 44200 | 39900 | 42300 | 733.5 | 1464.9 | 2 | 0.0042 | 2.893 |
| Uncharacterized protein OS=Bos taurus GN=Bt.3071 PE=4 SV=1 | tr F1ME65 F1ME65_BOVIN | IQNE ILK        | 84% | 37.4 | 50.63652 | Ref | -0.13 | -0.18 | -0.1  | -0.062 | -0.15 | -0.33 | -0.35 | 14500 | 11600 | 12300 | 14500 | 16400 | 13500 | 12400 | 12200 | 733.5 | 1464.9 | 2 | 0.0233 | 15.88 |

|                                                            |                        |                                 |     |      |          |     |       |       |       |        |       |       |       |       |       |       |       |       |       |       |       |       |        |   |        |       |
|------------------------------------------------------------|------------------------|---------------------------------|-----|------|----------|-----|-------|-------|-------|--------|-------|-------|-------|-------|-------|-------|-------|-------|-------|-------|-------|-------|--------|---|--------|-------|
| Uncharacterized protein OS=Bos taurus GN=Bt.3071 PE=4 SV=1 | tr F1ME65 F1ME65_BOVIN | IQSV<br>EDG<br>VQA<br>AR        | 79% | 37.4 | 52.32539 | Ref | -0.16 | -0.15 | -0.11 | -0.23  | -0.28 | -0.2  | -0.2  | 11900 | 9100  | 9940  | 11500 | 11600 | 9830  | 10800 | 10800 | 788.9 | 1575.8 | 2 | 0.0117 | 7.419 |
| Uncharacterized protein OS=Bos taurus GN=Bt.3071 PE=4 SV=1 | tr F1ME65 F1ME65_BOVIN | IQSV<br>EDG<br>VQA<br>AR        | 89% | 41.7 | 52.31457 | Ref | -0.42 | -0.17 | -0.14 | -0.35  | -0.23 | -0.16 | -0.07 | 83700 | 48300 | 62500 | 71900 | 68200 | 64800 | 71300 | 75200 | 788.9 | 1575.8 | 2 | 0.008  | 5.098 |
| Uncharacterized protein OS=Bos taurus GN=Bt.3071 PE=4 SV=1 | tr F1ME65 F1ME65_BOVIN | qGES<br>EINR                    | 82% | 37   | 49.72054 | Ref | -0.46 | -0.13 | -0.17 | -0.34  | 0.34  | -0.13 | -0.37 | 11900 | 8610  | 11700 | 12800 | 12500 | 17600 | 13200 | 11100 | 412.9 | 1235.6 | 3 | 0.01   | 8.107 |
| Uncharacterized protein OS=Bos taurus GN=Bt.3071 PE=4 SV=1 | tr F1ME65 F1ME65_BOVIN | qREE<br>LGQ<br>GLQ<br>GVE<br>Qk | 51% | 33.2 | 53.86624 | Ref | -0.55 | -0.14 | -0.31 | -0.068 | -0.16 | -0.1  | -0.11 | 17100 | 9730  | 14000 | 13900 | 18200 | 14900 | 16200 | 16000 | 993.5 | 1985   | 2 | 0.0152 | 7.668 |
| Uncharacterized protein OS=Bos taurus GN=Bt.3071 PE=4 SV=1 | tr F1ME65 F1ME65_BOVIN | qREE<br>LGQ<br>GLQ<br>GVE<br>Qk | 72% | 37.9 | 54.22436 | Ref | -0.47 | -0.14 | -0.04 | -0.04  | -0.12 | -0.29 | -0.29 | 35700 | 22200 | 30300 | 36500 | 40100 | 33200 | 30800 | 30600 | 769.8 | 2306.3 | 3 | 0.0211 | 9.144 |
| Uncharacterized protein OS=Bos taurus GN=Bt.3071 PE=4 SV=1 | tr F1ME65 F1ME65_BOVIN | qREE<br>LGQ<br>GLQ<br>GVE<br>Qk | 60% | 35.2 | 54.1071  | Ref | -0.35 | -0.17 | -0.18 | -0.01  | -0.2  | -0.22 | -0.12 | 7360  | 5290  | 6480  | 7220  | 8970  | 6880  | 7050  | 7530  | 769.8 | 2306.3 | 3 | 0.0178 | 7.714 |

|                                                            |                        |                    |     |      |          |     |        |       |       |        |       |       |       |       |       |       |       |       |       |       |       |       |        |   |        |       |
|------------------------------------------------------------|------------------------|--------------------|-----|------|----------|-----|--------|-------|-------|--------|-------|-------|-------|-------|-------|-------|-------|-------|-------|-------|-------|-------|--------|---|--------|-------|
| Uncharacterized protein OS=Bos taurus GN=Bt.3071 PE=4 SV=1 | tr F1ME65 F1ME65_BOVIN | sIND NIAI FTDV Qk  | 95% | 49   | 53.99097 | Ref | -0.2   | -0.41 | -0.14 | -0.017 | -0.35 | -0.36 | -0.35 | 5760  | 3410  | 3190  | 4340  | 5190  | 3590  | 3730  | 3740  | 1094  | 2185.2 | 2 | 0.0205 | 9.369 |
| Uncharacterized protein OS=Bos taurus GN=Bt.3071 PE=4 SV=1 | tr F1ME65 F1ME65_BOVIN | sIND NIAI FTDV Qk  | 95% | 59.4 | 53.91616 | Ref | -0.061 | -0.3  | -0.1  | -0.088 | -0.2  | -0.21 | -0.24 | 1010  | 916   | 845   | 1090  | 1210  | 974   | 1010  | 983   | 729.4 | 2185.2 | 3 | 0.013  | 5.941 |
| Uncharacterized protein OS=Bos taurus GN=Bt.3071 PE=4 SV=1 | tr F1ME65 F1ME65_BOVIN | sIND NIAI FTDV Qk  | 91% | 47.4 | 53.85202 | Ref | -0.034 | -0.41 | -0.18 | 0.003  | -0.5  | 0.044 | -0.21 | 586   | 530   | 444   | 582   | 730   | 448   | 684   | 569   | 729.4 | 2185.2 | 3 | 0.0086 | 3.938 |
| Uncharacterized protein OS=Bos taurus GN=Bt.3071 PE=4 SV=1 | tr F1ME65 F1ME65_BOVIN | sIND NIAI FTDV Qk  | 93% | 49.7 | 54.15179 | Ref | -0.047 | -0.22 | -0.15 | -0.21  | -0.33 | -0.22 | -0.07 | 3730  | 3270  | 3130  | 3700  | 3900  | 3130  | 3550  | 3900  | 729.7 | 2186.2 | 3 | 0.0208 | 9.51  |
| Uncharacterized protein OS=Bos taurus GN=Bt.3071 PE=4 SV=1 | tr F1ME65 F1ME65_BOVIN | sTIQ TME SDVY TEVk | 90% | 47.2 | 54.57743 | Ref | -0.24  | -0.11 | -0.41 | 0.055  | -0.31 | -0.16 | -0.45 | 22000 | 13900 | 16600 | 15100 | 23000 | 15600 | 18000 | 14600 | 780.4 | 2338.2 | 3 | 0.0034 | 1.462 |
| Uncharacterized protein OS=Bos taurus GN=Bt.3071 PE=4 SV=1 | tr F1ME65 F1ME65_BOVIN | sTIQ TME SDVY TEVk | 95% | 53.5 | 54.47431 | Ref | -0.25  | -0.32 | 0.083 | -0.33  | -0.16 | -0.25 | -0.1  | 2000  | 1480  | 1530  | 2270  | 1880  | 1840  | 1810  | 2000  | 780.4 | 2338.2 | 3 | 0.0157 | 6.695 |

|                                                            |                                |                         |     |      |          |     |       |       |       |        |       |       |       |       |       |       |       |       |       |       |       |       |        |   |        |       |
|------------------------------------------------------------|--------------------------------|-------------------------|-----|------|----------|-----|-------|-------|-------|--------|-------|-------|-------|-------|-------|-------|-------|-------|-------|-------|-------|-------|--------|---|--------|-------|
| Uncharacterized protein OS=Bos taurus GN=Bt.3071 PE=4 SV=1 | tr F1ME6<br>5 F1ME6<br>5_BOVIN | tAVD<br>SLVA<br>YSVK    | 95% | 59.7 | 52.75967 | Ref | -0.47 | -0.33 | -0.07 | -0.077 | -0.12 | -0.1  | -0.03 | 17000 | 12000 | 14300 | 19200 | 21000 | 17900 | 18900 | 19700 | 621   | 1860.1 | 3 | 0.0168 | 9.014 |
| Uncharacterized protein OS=Bos taurus GN=Bt.3071 PE=4 SV=1 | tr F1ME6<br>5 F1ME6<br>5_BOVIN | tAVD<br>SLVA<br>YSVK    | 95% | 58   | 52.64334 | Ref | -0.26 | -0.16 | -0.01 | -0.1   | -0.35 | -0.25 | -0.17 | 77400 | 57300 | 66600 | 82600 | 85500 | 62800 | 70400 | 73700 | 621   | 1860.1 | 3 | 0.0146 | 7.837 |
| Uncharacterized protein OS=Bos taurus GN=Bt.3071 PE=4 SV=1 | tr F1ME6<br>5 F1ME6<br>5_BOVIN | tAVD<br>SLVA<br>YSVK    | 95% | 66   | 52.64334 | Ref | -0.38 | -0.24 | 0.002 | 0.068  | -0.23 | -0.27 | -0.22 | 7820  | 5490  | 6560  | 8730  | 10100 | 7170  | 7250  | 7470  | 931   | 1860.1 | 2 | 0.0145 | 7.796 |
| Uncharacterized protein OS=Bos taurus GN=Bt.3071 PE=4 SV=1 | tr F1ME6<br>5 F1ME6<br>5_BOVIN | tAVD<br>SLVA<br>YSVK    | 95% | 56.7 | 52.63468 | Ref | -0.36 | -0.2  | -0.16 | -0.21  | -0.15 | -0.3  | -0.07 | 18900 | 11900 | 14400 | 16700 | 17700 | 16100 | 15100 | 17600 | 621   | 1860.1 | 3 | 0.0118 | 6.354 |
| Uncharacterized protein OS=Bos taurus GN=Bt.3071 PE=4 SV=1 | tr F1ME6<br>5 F1ME6<br>5_BOVIN | tAVD<br>SLVA<br>YSVK    | 95% | 72.3 | 52.60498 | Ref | -0.29 | -0.15 | -0.25 | -0.14  | -0.19 | -0.25 | -0.21 | 3760  | 2420  | 2910  | 3050  | 3620  | 3040  | 3050  | 3110  | 931   | 1860.1 | 2 | 0.0117 | 6.281 |
| Uncharacterized protein OS=Bos taurus GN=Bt.3071 PE=4 SV=1 | tr F1ME6<br>5 F1ME6<br>5_BOVIN | vQE<br>QVH<br>TLLG<br>R | 85% | 39.8 | 52.35708 | Ref | -0.16 | -0.16 | -0.1  | -0.24  | -0.1  | -0.33 | -0.22 | 9490  | 7380  | 8000  | 9360  | 9360  | 9020  | 8020  | 8580  | 792.5 | 1582.9 | 2 | 0.013  | 8.229 |

|                                                            |                        |                |     |      |          |     |       |       |       |        |       |       |       |       |       |       |       |       |       |       |       |       |        |   |        |       |
|------------------------------------------------------------|------------------------|----------------|-----|------|----------|-----|-------|-------|-------|--------|-------|-------|-------|-------|-------|-------|-------|-------|-------|-------|-------|-------|--------|---|--------|-------|
| Uncharacterized protein OS=Bos taurus GN=Bt.3071 PE=4 SV=1 | tr F1ME65 F1ME65_BOVIN | vQE QVH TLLG R | 73% | 36.3 | 52.31684 | Ref | -0.28 | -0.32 | 0.037 | -0.16  | -0.22 | -0.31 | -0.26 | 9300  | 6050  | 6370  | 9160  | 8780  | 7350  | 7260  | 7460  | 528.6 | 1582.9 | 3 | 0.0113 | 7.115 |
| Uncharacterized protein OS=Bos taurus GN=Bt.3071 PE=4 SV=1 | tr F1ME65 F1ME65_BOVIN | vQE QVH TLLG R | 94% | 50.6 | 52.42924 | Ref | -0.48 | -0.09 | -0.28 | -0.17  | -0.3  | -0.14 | -0.11 | 7440  | 4110  | 5810  | 5720  | 6790  | 5450  | 6330  | 6450  | 528.6 | 1582.9 | 3 | 0.0164 | 10.35 |
| Uncharacterized protein OS=Bos taurus GN=Bt.3071 PE=4 SV=1 | tr F1ME65 F1ME65_BOVIN | vQE QVH TLLG R | 90% | 44.5 | 52.3005  | Ref | -0.3  | -0.08 | -0.02 | -0.32  | -0.26 | -0.14 | -0.24 | 9930  | 6890  | 8720  | 10200 | 9130  | 8270  | 9380  | 8710  | 528.6 | 1582.9 | 3 | 0.0105 | 6.661 |
| Uncharacterized protein OS=Bos taurus GN=Bt.3071 PE=4 SV=1 | tr F1ME65 F1ME65_BOVIN | vQE QVH TLLG R | 95% | 48.6 | 52.48628 | Ref | -0.31 | -0.18 | -0.2  | -0.16  | -0.15 | -0.11 | -0.19 | 5490  | 3880  | 4590  | 5080  | 5750  | 5080  | 5430  | 5120  | 792.5 | 1582.9 | 2 | 0.01   | 6.31  |
| Uncharacterized protein OS=Bos taurus GN=Bt.3071 PE=4 SV=1 | tr F1ME65 F1ME65_BOVIN | vQE QVH TLLG R | 90% | 42.7 | 52.46585 | Ref | -0.3  | -0.15 | -0.14 | -0.099 | -0.24 | -0.1  | -0.17 | 5830  | 4450  | 5350  | 6070  | 6870  | 5420  | 6270  | 5910  | 792.5 | 1582.9 | 2 | 0.0096 | 6.07  |
| Uncharacterized protein OS=Bos taurus GN=Bt.3071 PE=4 SV=1 | tr F1ME65 F1ME65_BOVIN | vQE QVH TLLG R | 94% | 50.7 | 52.5329  | Ref | -0.35 | -0.33 | 0.043 | -0.3   | -0.2  | -0.17 | -0.19 | 28500 | 17700 | 19500 | 28300 | 24600 | 23000 | 24500 | 24000 | 528.6 | 1582.9 | 3 | 0.0089 | 5.619 |

|                                                            |                                                                                                         |                           |     |      |          |     |        |       |       |        |       |       |       |       |       |       |       |       |       |       |       |       |        |   |        |       |
|------------------------------------------------------------|---------------------------------------------------------------------------------------------------------|---------------------------|-----|------|----------|-----|--------|-------|-------|--------|-------|-------|-------|-------|-------|-------|-------|-------|-------|-------|-------|-------|--------|---|--------|-------|
| Uncharacterized protein OS=Bos taurus GN=Bt.3071 PE=4 SV=1 | tr F1ME65 F1ME65_BOVIN                                                                                  | vQE QVH TLLG R            | 79% | 38.2 | 52.27961 | Ref | 0.056  | -0.1  | -0.41 | -0.16  | -0.42 | -0.06 | -0.18 | 1120  | 1080  | 1050  | 951   | 1240  | 906   | 1220  | 1110  | 528.6 | 1582.9 | 3 | 0.0058 | 3.649 |
| Uncharacterized protein OS=Bos taurus GN=Bt.3071 PE=4 SV=1 | tr F1ME65 F1ME65_BOVIN                                                                                  | vQE QVH TLLG R            | 59% | 33.2 | 52.31087 | Ref | -0.26  | -0.03 | -0.45 | -0.12  | -0.01 | -0.09 | -0.25 | 815   | 651   | 828   | 693   | 963   | 906   | 899   | 793   | 528.6 | 1582.9 | 3 | 0.0067 | 4.236 |
| Uncharacterized protein OS=Bos taurus GN=Bt.3071 PE=4 SV=1 | tr F1ME65 F1ME65_BOVIN                                                                                  | vQSL QAT FGTF ESLV R      | 84% | 42.3 | 53.99956 | Ref | -0.15  | -0.09 | -0.2  | -0.28  | -0.54 | 0.096 | -0.11 | 1070  | 900   | 1010  | 1060  | 1100  | 804   | 1300  | 1120  | 696.4 | 2086.1 | 3 | 0.0024 | 1.171 |
| Uncharacterized protein OS=Bos taurus GN=Bt.3071 PE=4 SV=1 | tr F1ME65 F1ME65_BOVIN                                                                                  | vQSL QAT FGTF ESLV R      | 89% | 43.6 | 54.07025 | Ref | -0.94  | -0.32 | 0.08  | -0.27  | -0.05 | -0.03 | -0.3  | 326   | 125   | 208   | 308   | 266   | 271   | 287   | 236   | 1044  | 2086.1 | 2 | 0.0107 | 5.136 |
| Uncharacterized protein OS=Bos taurus GN=Bt.3071 PE=4 SV=1 | tr F1ME65 F1ME65_BOVIN                                                                                  | vQSL QAT FGTF ESLV R      | 95% | 68.3 | 54.0557  | Ref | -0.21  | -0.2  | -0.35 | -0.66  | -0.31 | -0.1  | 0.33  | 360   | 271   | 296   | 300   | 266   | 295   | 356   | 479   | 696.4 | 2086.1 | 3 | 0.0087 | 4.147 |
| Trypsin - Sus scrofa (Pig).                                | IPI:CON_Trypsin SWISS-PROT:P00761 TRYP_PIG,sp P00761 TRYP_PIG,tri CS1WV5 CS1WV5_PIG,tri F1RS2 F1RS2_PIG | iITHP NFh GNT LDN DIML lk | 62% | 34.9 | 55.21031 | Ref | -0.004 | -0.01 | 0.18  | -0.072 | 0.16  | 0.14  | -0.11 | 23100 | 20400 | 22100 | 28300 | 26100 | 26800 | 27500 | 23000 | 723.9 | 2891.5 | 4 | 0.0209 | 7.221 |

|                             |                                                                                                                                                         |                                          |     |      |          |     |       |       |       |        |       |       |       |      |      |      |      |      |      |      |      |       |        |   |        |       |
|-----------------------------|---------------------------------------------------------------------------------------------------------------------------------------------------------|------------------------------------------|-----|------|----------|-----|-------|-------|-------|--------|-------|-------|-------|------|------|------|------|------|------|------|------|-------|--------|---|--------|-------|
| Trypsin - Sus scrofa (Pig). | IPI:CON_T<br>rypsin S<br>WISS-<br>PROT:P00<br>761 TRYP<br>_PIG,sp P<br>00761 TR<br>YP_PIG,tr<br> CSIWV5 <br>C5IWV5_<br>PIG,tr F1S<br>RS2 F1SR<br>S2_PIG | iiTHP<br>NFn<br>GnTL<br>DNDI<br>MLIK     | 55% | 35.4 | 55.13255 | Ref | 0.18  | 0.14  | 0.14  | -0.27  | 0.13  | -0.03 | 0.003 | 1380 | 1410 | 1490 | 1680 | 1390 | 1600 | 1490 | 1520 | 964.9 | 2891.6 | 3 | 0.016  | 5.546 |
| Trypsin - Sus scrofa (Pig). | IPI:CON_T<br>rypsin S<br>WISS-<br>PROT:P00<br>761 TRYP<br>_PIG,sp P<br>00761 TR<br>YP_PIG,tr<br> CSIWV5 <br>C5IWV5_<br>PIG,tr F1S<br>RS2 F1SR<br>S2_PIG | iiTHP<br>nFn<br>GNT<br>LDN<br>DImL<br>Ik | 69% | 36.5 | 55.37371 | Ref | 0.053 | -0.09 | 0.018 | -0.008 | 0.064 | 0.17  | -0.07 | 1320 | 1090 | 1070 | 1290 | 1400 | 1290 | 1450 | 1220 | 727.9 | 2907.5 | 4 | 0.017  | 5.831 |
| Trypsin - Sus scrofa (Pig). | IPI:CON_T<br>rypsin S<br>WISS-<br>PROT:P00<br>761 TRYP<br>_PIG,sp P<br>00761 TR<br>YP_PIG,tr<br> CSIWV5 <br>C5IWV5_<br>PIG,tr F1S<br>RS2 F1SR<br>S2_PIG | iiTHP<br>NFn<br>GNT<br>LDn<br>DIML<br>Ik | 72% | 37.1 | 55.24775 | Ref | 0.074 | -0.07 | 0.079 | -0.035 | 0.15  | 0.07  | 0.024 | 4910 | 4540 | 4450 | 5550 | 5650 | 5620 | 5550 | 5330 | 724.1 | 2892.5 | 4 | 0.0072 | 2.494 |



|                             |                                                                                                                                                         |                                          |     |      |          |     |       |       |       |        |       |       |       |       |      |       |       |       |       |       |       |       |        |   |        |       |
|-----------------------------|---------------------------------------------------------------------------------------------------------------------------------------------------------|------------------------------------------|-----|------|----------|-----|-------|-------|-------|--------|-------|-------|-------|-------|------|-------|-------|-------|-------|-------|-------|-------|--------|---|--------|-------|
| Trypsin - Sus scrofa (Pig). | IPI:CON_T<br>rypsin S<br>WISS-<br>PROT:P00<br>761 TRYP<br>_PIG,sp P<br>00761 TR<br>YP_PIG,tr<br> CSIWV5 <br>C5IWV5_<br>PIG,tr F1S<br>RS2 F1SR<br>S2_PIG | iITHP<br>NFn<br>GNT<br>LDn<br>DIML<br>Ik | 90% | 47.8 | 55.17055 | Ref | 0.16  | -0.11 | 0.058 | 0.052  | 0.052 | 0.012 | -0.04 | 1850  | 1700 | 1520  | 1920  | 2110  | 1840  | 1870  | 1800  | 965.2 | 2892.6 | 3 | 0.0011 | 0.395 |
| Trypsin - Sus scrofa (Pig). | IPI:CON_T<br>rypsin S<br>WISS-<br>PROT:P00<br>761 TRYP<br>_PIG,sp P<br>00761 TR<br>YP_PIG,tr<br> CSIWV5 <br>C5IWV5_<br>PIG,tr F1S<br>RS2 F1SR<br>S2_PIG | IGEH<br>NIDV<br>LEG<br>NEQ<br>FINA<br>Ak | 55% | 35.6 | 55.33766 | Ref | -0.29 | 0.005 | 0.24  | -0.038 | 0.11  | -0.1  | -0.08 | 15400 | 8580 | 11400 | 15100 | 13700 | 13300 | 12000 | 12100 | 940.5 | 2818.5 | 3 | 0.0337 | 11.94 |
| Trypsin - Sus scrofa (Pig). | IPI:CON_T<br>rypsin S<br>WISS-<br>PROT:P00<br>761 TRYP<br>_PIG,sp P<br>00761 TR<br>YP_PIG,tr<br> CSIWV5 <br>C5IWV5_<br>PIG,tr F1S<br>RS2 F1SR<br>S2_PIG | IGEH<br>NIDV<br>LEG<br>NEQ<br>FINA<br>Ak | 83% | 43   | 55.28796 | Ref | 0.029 | 0.034 | 0.04  | -0.069 | 0.23  | 0.027 | 0.12  | 2900  | 2860 | 3120  | 3510  | 3590  | 3860  | 3500  | 3700  | 940.5 | 2818.5 | 3 | 0.0238 | 8.441 |

|                             |                                                                                                                                                         |                                          |     |      |          |     |       |       |       |       |       |       |       |       |       |       |       |       |       |       |       |       |        |   |        |       |
|-----------------------------|---------------------------------------------------------------------------------------------------------------------------------------------------------|------------------------------------------|-----|------|----------|-----|-------|-------|-------|-------|-------|-------|-------|-------|-------|-------|-------|-------|-------|-------|-------|-------|--------|---|--------|-------|
| Trypsin - Sus scrofa (Pig). | IPI:CON_T<br>rypsin S<br>WISS-<br>PROT:P00<br>761 TRYP<br>_PIG,sp P<br>00761 TR<br>YP_PIG,tr<br> C5IWV5 <br>C5IWV5_<br>PIG,tr F1S<br>RS2 F1SR<br>S2_PIG | IGEH<br>NIDV<br>LEG<br>NEQ<br>FINA<br>Ak | 95% | 54.9 | 55.28796 | Ref | 0.066 | -0.16 | 0.11  | 0.039 | 0.13  | -0.04 | -0    | 5210  | 4350  | 4040  | 5440  | 5730  | 5330  | 4930  | 5050  | 940.5 | 2818.5 | 3 | 0.0238 | 8.441 |
| Trypsin - Sus scrofa (Pig). | IPI:CON_T<br>rypsin S<br>WISS-<br>PROT:P00<br>761 TRYP<br>_PIG,sp P<br>00761 TR<br>YP_PIG,tr<br> C5IWV5 <br>C5IWV5_<br>PIG,tr F1S<br>RS2 F1SR<br>S2_PIG | IGEH<br>NIDV<br>LEG<br>NEQ<br>FINA<br>Ak | 94% | 52.5 | 55.27961 | Ref | 0.12  | 0.088 | 0.33  | 0.24  | 0.078 | -0.35 | -0.22 | 29300 | 30300 | 32100 | 42600 | 44000 | 34400 | 26800 | 29100 | 940.5 | 2818.5 | 3 | 0.0212 | 7.526 |
| Trypsin - Sus scrofa (Pig). | IPI:CON_T<br>rypsin S<br>WISS-<br>PROT:P00<br>761 TRYP<br>_PIG,sp P<br>00761 TR<br>YP_PIG,tr<br> C5IWV5 <br>C5IWV5_<br>PIG,tr F1S<br>RS2 F1SR<br>S2_PIG | IGEH<br>NIDV<br>LEG<br>NEQ<br>FINA<br>Ak | 89% | 44.1 | 55.27953 | Ref | 0.03  | -0.07 | 0.028 | -0.23 | 0.16  | -0.08 | 0.49  | 20300 | 20200 | 20500 | 24500 | 22600 | 25900 | 22800 | 33700 | 705.6 | 2818.5 | 4 | 0.0197 | 6.974 |

|                             |                                                                                                                                                         |                                          |     |      |          |     |                                          |                                            |                                       |                                                      |                                        |                                       |                                       |                                       |                                          |                                            |                                       |                                            |                                            |                                       |                                       |       |        |   |        |       |
|-----------------------------|---------------------------------------------------------------------------------------------------------------------------------------------------------|------------------------------------------|-----|------|----------|-----|------------------------------------------|--------------------------------------------|---------------------------------------|------------------------------------------------------|----------------------------------------|---------------------------------------|---------------------------------------|---------------------------------------|------------------------------------------|--------------------------------------------|---------------------------------------|--------------------------------------------|--------------------------------------------|---------------------------------------|---------------------------------------|-------|--------|---|--------|-------|
| Trypsin - Sus scrofa (Pig). | IPI:CON_T<br>rypsin S<br>WISS-<br>PROT:P00<br>761 TRYP<br>_PIG,sp P<br>00761 TR<br>YP_PIG,tr<br> C5IWV5 <br>C5IWV5_<br>PIG,tr F1S<br>RS2 F1SR<br>S2_PIG | IGEH<br>NIDV<br>LEG<br>NEQ<br>FINA<br>Ak | 95% | 55.6 | 55.2774  | Ref | 0.2                                      | -0.26                                      | 0.33                                  | -0.12                                                | -0.16                                  | 0.19                                  | -0.04                                 | 1E+05                                 | 142000                                   | 1E+05                                      | 189000                                | 153000                                     | 1E+05                                      | 2E+05                                 | 145000                                | 705.6 | 2818.5 | 4 | 0.0179 | 6.364 |
| Trypsin - Sus scrofa (Pig). | IPI:CON_T<br>rypsin S<br>WISS-<br>PROT:P00<br>761 TRYP<br>_PIG,sp P<br>00761 TR<br>YP_PIG,tr<br> C5IWV5 <br>C5IWV5_<br>PIG,tr F1S<br>RS2 F1SR<br>S2_PIG | IGEH<br>NIDV<br>LEG<br>NEQ<br>FINA<br>Ak | 78% | 38.9 | 55.24023 | Ref | Referen<br>ce Miss<br>ing (1.4091<br>66) | No<br>Value<br>s (-<br>0.624<br>62616<br>) | No<br>Value<br>s (-<br>0.791<br>2209) | Referen<br>ce Miss<br>ing (0.966<br>0.7358<br>28785) | No<br>Value<br>s (-<br>0.7358<br>2774) | No<br>Value<br>s (-<br>0.798<br>5944) | No<br>Value<br>s (-<br>0.7877<br>202) | No<br>Value<br>s (-<br>0.7093<br>227) | Referen<br>ce Miss<br>ing (1.409166<br>) | No<br>Value<br>s (-<br>0.624<br>62616<br>) | No<br>Value<br>s (-<br>0.7912<br>209) | Referen<br>ce Miss<br>ing (0.966287<br>85) | No<br>Value<br>s (-<br>0.735<br>82774<br>) | No<br>Value<br>s (-<br>0.7985<br>944) | No<br>Value<br>s (-<br>0.787720<br>2) | 705.6 | 2818.5 | 4 | 0.016  | 5.669 |
| Trypsin - Sus scrofa (Pig). | IPI:CON_T<br>rypsin S<br>WISS-<br>PROT:P00<br>761 TRYP<br>_PIG,sp P<br>00761 TR<br>YP_PIG,tr<br> C5IWV5 <br>C5IWV5_<br>PIG,tr F1S<br>RS2 F1SR<br>S2_PIG | IGEH<br>NIDV<br>LEG<br>NEQ<br>FINA<br>Ak | 95% | 53.8 | 55.33192 | Ref | -0.14                                    | 0.32                                       | 0.26                                  | -0.13                                                | 0.27                                   | -0.25                                 | -0.33                                 | 3090                                  | 2230                                     | 3330                                       | 3580                                  | 3000                                       | 3480                                       | 2530                                  | 2370                                  | 940.5 | 2818.5 | 3 | 0.0348 | 12.33 |

|                             |                                                                                                                                                         |                                          |     |      |          |     |       |       |       |        |       |       |       |       |       |       |        |       |       |       |       |       |        |   |        |       |
|-----------------------------|---------------------------------------------------------------------------------------------------------------------------------------------------------|------------------------------------------|-----|------|----------|-----|-------|-------|-------|--------|-------|-------|-------|-------|-------|-------|--------|-------|-------|-------|-------|-------|--------|---|--------|-------|
| Trypsin - Sus scrofa (Pig). | IPI:CON_T<br>rypsin S<br>WISS-<br>PROT:P00<br>761 TRYP<br>_PIG,sp P<br>00761 TR<br>YP_PIG,tr<br> CSIWV5 <br>CSIWV5_<br>PIG,tr F1S<br>RS2 F1SR<br>S2_PIG | IGEH<br>NIDV<br>LEG<br>NEQ<br>FINA<br>Ak | 95% | 55.9 | 55.28259 | Ref | 0.29  | 0.016 | -0.05 | -0.058 | -0.04 | 0.094 | 0.07  | 9350  | 10400 | 9380  | 10100  | 11000 | 9780  | 11200 | 10900 | 705.6 | 2818.5 | 4 | 0.0248 | 8.79  |
| Trypsin - Sus scrofa (Pig). | IPI:CON_T<br>rypsin S<br>WISS-<br>PROT:P00<br>761 TRYP<br>_PIG,sp P<br>00761 TR<br>YP_PIG,tr<br> CSIWV5 <br>CSIWV5_<br>PIG,tr F1S<br>RS2 F1SR<br>S2_PIG | IGEH<br>NIDV<br>LEG<br>NEQ<br>FINA<br>Ak | 86% | 44.6 | 55.29058 | Ref | -0.1  | 0.22  | 0.11  | 0.032  | 0.12  | 0.11  | -0.02 | 1690  | 1620  | 2190  | 2290   | 2390  | 2220  | 2300  | 2090  | 940.5 | 2818.5 | 3 | 0.0223 | 7.919 |
| Trypsin - Sus scrofa (Pig). | IPI:CON_T<br>rypsin S<br>WISS-<br>PROT:P00<br>761 TRYP<br>_PIG,sp P<br>00761 TR<br>YP_PIG,tr<br> CSIWV5 <br>CSIWV5_<br>PIG,tr F1S<br>RS2 F1SR<br>S2_PIG | IGEH<br>NIDV<br>LEG<br>NEQ<br>FINA<br>Ak | 94% | 52.7 | 55.2898  | Ref | -0.19 | 0.36  | 0.12  | -0.41  | 0.26  | -0.06 | 0.1   | 85400 | 66600 | 1E+05 | 101000 | 76600 | 1E+05 | 89600 | 99100 | 940.5 | 2818.5 | 3 | 0.0203 | 7.206 |

|                             |                                                                                                                                                         |                                          |     |      |          |     |      |       |       |       |       |       |       |       |        |       |        |        |       |       |        |       |        |   |        |       |
|-----------------------------|---------------------------------------------------------------------------------------------------------------------------------------------------------|------------------------------------------|-----|------|----------|-----|------|-------|-------|-------|-------|-------|-------|-------|--------|-------|--------|--------|-------|-------|--------|-------|--------|---|--------|-------|
| Trypsin - Sus scrofa (Pig). | IPI:CON_T<br>rypsin S<br>WISS-<br>PROT:P00<br>761 TRYP<br>_PIG,sp P<br>00761 TR<br>YP_PIG,tr<br> CSIWV5 <br>CSIWV5_<br>PIG,tr F1S<br>RS2 F1SR<br>S2_PIG | IGEH<br>NIDV<br>LEG<br>NEQ<br>FINA<br>Ak | 90% | 47.9 | 55.29619 | Ref | 0.22 | 0.093 | 0.094 | 0.083 | 0.29  | -0.47 | 0.025 | 2910  | 3310   | 3300  | 3710   | 4060   | 4080  | 2520  | 3530   | 940.5 | 2818.5 | 3 | 0.0188 | 6.685 |
| Trypsin - Sus scrofa (Pig). | IPI:CON_T<br>rypsin S<br>WISS-<br>PROT:P00<br>761 TRYP<br>_PIG,sp P<br>00761 TR<br>YP_PIG,tr<br> CSIWV5 <br>CSIWV5_<br>PIG,tr F1S<br>RS2 F1SR<br>S2_PIG | IGEH<br>NIDV<br>LEG<br>NEQ<br>FINA<br>Ak | 95% | 56.6 | 55.26518 | Ref | 0.37 | 0.012 | -0.01 | 0.073 | -0.18 | 0.021 | -0.21 | 4E+05 | 372000 | 3E+05 | 349000 | 406000 | 3E+05 | 4E+05 | 301000 | 705.6 | 2818.5 | 4 | 0.017  | 6.024 |
| Trypsin - Sus scrofa (Pig). | IPI:CON_T<br>rypsin S<br>WISS-<br>PROT:P00<br>761 TRYP<br>_PIG,sp P<br>00761 TR<br>YP_PIG,tr<br> CSIWV5 <br>CSIWV5_<br>PIG,tr F1S<br>RS2 F1SR<br>S2_PIG | IGEH<br>NIDV<br>LEG<br>NEQ<br>FINA<br>Ak | 95% | 55.5 | 55.31115 | Ref | 0.18 | -0    | -0.01 | -0.19 | 0.009 | -0.03 | 0.33  | 3090  | 3160   | 3030  | 3380   | 3290   | 3300  | 3350  | 4270   | 705.6 | 2818.5 | 4 | 0.0263 | 9.315 |

|                             |                                                                                                                                                         |                                          |     |      |          |     |       |       |       |       |       |       |       |      |      |      |      |      |      |      |      |       |        |   |        |       |
|-----------------------------|---------------------------------------------------------------------------------------------------------------------------------------------------------|------------------------------------------|-----|------|----------|-----|-------|-------|-------|-------|-------|-------|-------|------|------|------|------|------|------|------|------|-------|--------|---|--------|-------|
| Trypsin - Sus scrofa (Pig). | IPI:CON_T<br>rypsin S<br>WISS-<br>PROT:P00<br>761 TRYP<br>_PIG,sp P<br>00761 TR<br>YP_PIG,tr<br> CS1WV5 <br>C51WV5_<br>PIG,tr F1S<br>RS2 F1SR<br>S2_PIG | IGEH<br>NIDV<br>LEG<br>NEQ<br>FINA<br>Ak | 76% | 40.1 | 55.25506 | Ref | 0.084 | -0.05 | 0.32  | 0.051 | 0.32  | -0.41 | -0.13 | 319  | 302  | 300  | 432  | 397  | 418  | 263  | 317  | 940.5 | 2818.5 | 3 | 0.0174 | 6.164 |
| Trypsin - Sus scrofa (Pig). | IPI:CON_T<br>rypsin S<br>WISS-<br>PROT:P00<br>761 TRYP<br>_PIG,sp P<br>00761 TR<br>YP_PIG,tr<br> CS1WV5 <br>C51WV5_<br>PIG,tr F1S<br>RS2 F1SR<br>S2_PIG | IGEH<br>NIDV<br>LEG<br>NEQ<br>FINA<br>Ak | 93% | 48.1 | 55.29341 | Ref | 0.055 | 0.007 | 0.081 | 0.004 | -0.09 | 0.21  | 0.047 | 2840 | 2640 | 2770 | 3280 | 3420 | 2800 | 3590 | 3190 | 705.6 | 2818.5 | 4 | 0.0255 | 9.046 |
| Trypsin - Sus scrofa (Pig). | IPI:CON_T<br>rypsin S<br>WISS-<br>PROT:P00<br>761 TRYP<br>_PIG,sp P<br>00761 TR<br>YP_PIG,tr<br> CS1WV5 <br>C51WV5_<br>PIG,tr F1S<br>RS2 F1SR<br>S2_PIG | IGEH<br>NIDV<br>LEG<br>NEQ<br>FINA<br>Ak | 95% | 65.9 | 55.23403 | Ref | -0.11 | 0.16  | 0.4   | -0.14 | 0.27  | -0.13 | -0.14 | 671  | 602  | 790  | 1050 | 792  | 920  | 729  | 717  | 940.5 | 2818.5 | 3 | 0.0135 | 4.802 |

|                             |                                                                                                                                                         |                                          |     |      |          |     |       |       |       |       |       |       |       |     |     |     |     |     |     |     |     |       |        |   |        |       |
|-----------------------------|---------------------------------------------------------------------------------------------------------------------------------------------------------|------------------------------------------|-----|------|----------|-----|-------|-------|-------|-------|-------|-------|-------|-----|-----|-----|-----|-----|-----|-----|-----|-------|--------|---|--------|-------|
| Trypsin - Sus scrofa (Pig). | IPI:CON_T<br>rypsin S<br>WISS-<br>PROT:P00<br>761 TRYP<br>_PIG,sp P<br>00761 TR<br>YP_PIG,tr<br> CSIWV5 <br>CSIWV5_<br>PIG,tr F1S<br>RS2 F1SR<br>S2_PIG | IGEH<br>NIDV<br>LEG<br>NEQ<br>FINA<br>Ak | 95% | 62   | 55.19981 | Ref | -0.18 | 0.073 | 0.014 | -0.31 | 0.21  | 0.036 | 0.22  | 345 | 239 | 309 | 333 | 292 | 368 | 340 | 382 | 940.5 | 2818.5 | 3 | 0.0101 | 3.567 |
| Trypsin - Sus scrofa (Pig). | IPI:CON_T<br>rypsin S<br>WISS-<br>PROT:P00<br>761 TRYP<br>_PIG,sp P<br>00761 TR<br>YP_PIG,tr<br> CSIWV5 <br>CSIWV5_<br>PIG,tr F1S<br>RS2 F1SR<br>S2_PIG | IGEH<br>NIDV<br>LEG<br>NEQ<br>FINA<br>Ak | 89% | 44.1 | 55.26901 | Ref | 0.25  | 0.19  | -0.11 | -0.24 | -0.15 | 0.39  | 0.011 | 177 | 209 | 217 | 198 | 200 | 184 | 280 | 214 | 705.6 | 2818.5 | 4 | 0.0192 | 6.804 |
| Trypsin - Sus scrofa (Pig). | IPI:CON_T<br>rypsin S<br>WISS-<br>PROT:P00<br>761 TRYP<br>_PIG,sp P<br>00761 TR<br>YP_PIG,tr<br> CSIWV5 <br>CSIWV5_<br>PIG,tr F1S<br>RS2 F1SR<br>S2_PIG | IGEH<br>NIDV<br>LEG<br>NEQ<br>FINA<br>Ak | 95% | 58.9 | 55.2525  | Ref | 0.076 | 0.17  | 0.009 | -0.02 | 0.16  | 0.073 | -0.05 | 288 | 295 | 342 | 343 | 371 | 368 | 361 | 329 | 705.6 | 2818.5 | 4 | 0.0155 | 5.499 |

|                             |                                                                                                                                                         |                                          |     |      |          |     |        |       |       |        |       |       |       |       |       |       |       |       |       |       |       |       |        |   |        |       |
|-----------------------------|---------------------------------------------------------------------------------------------------------------------------------------------------------|------------------------------------------|-----|------|----------|-----|--------|-------|-------|--------|-------|-------|-------|-------|-------|-------|-------|-------|-------|-------|-------|-------|--------|---|--------|-------|
| Trypsin - Sus scrofa (Pig). | IPI:CON_T<br>rypsin S<br>WISS-<br>PROT:P00<br>761 TRYP<br>_PIG,sp P<br>00761 TR<br>YP_PIG,tr<br> CSIWV5 <br>CSIWV5_<br>PIG,tr F1S<br>RS2 F1SR<br>S2_PIG | IGEH<br>NIDV<br>LEG<br>NEQ<br>FINA<br>AK | 79% | 39.1 | 55.18532 | Ref | -0.024 | 0.33  | -0.02 | -0.11  | 0.23  | -0.03 | -0.04 | 249   | 228   | 317   | 277   | 288   | 317   | 277   | 273   | 705.6 | 2818.5 | 4 | 0.0065 | 2.293 |
| Trypsin - Sus scrofa (Pig). | IPI:CON_T<br>rypsin S<br>WISS-<br>PROT:P00<br>761 TRYP<br>_PIG,sp P<br>00761 TR<br>YP_PIG,tr<br> CSIWV5 <br>CSIWV5_<br>PIG,tr F1S<br>RS2 F1SR<br>S2_PIG | IGEH<br>NIDV<br>LEGn<br>EQFI<br>NAA<br>k | 86% | 42.5 | 55.32903 | Ref | 0.035  | -0.08 | 0.082 | -0.051 | 0.064 | 0.082 | 0.16  | 8820  | 7950  | 7960  | 10000 | 10100 | 9500  | 10100 | 10500 | 705.9 | 2819.5 | 4 | 0.0209 | 7.401 |
| Trypsin - Sus scrofa (Pig). | IPI:CON_T<br>rypsin S<br>WISS-<br>PROT:P00<br>761 TRYP<br>_PIG,sp P<br>00761 TR<br>YP_PIG,tr<br> CSIWV5 <br>CSIWV5_<br>PIG,tr F1S<br>RS2 F1SR<br>S2_PIG | IGEH<br>NIDV<br>LEGn<br>EQFI<br>NAA<br>k | 92% | 49.5 | 55.32756 | Ref | 0.093  | -0.02 | -0.04 | -0.084 | 0.28  | -0.19 | 0.15  | 13000 | 11700 | 11700 | 13000 | 13900 | 15500 | 11700 | 14800 | 940.8 | 2819.5 | 3 | 0.0147 | 5.229 |



|                             |                                                                                                                                                         |                                          |     |      |          |     |       |       |       |        |       |       |       |       |         |       |       |         |       |       |         |       |        |   |        |       |
|-----------------------------|---------------------------------------------------------------------------------------------------------------------------------------------------------|------------------------------------------|-----|------|----------|-----|-------|-------|-------|--------|-------|-------|-------|-------|---------|-------|-------|---------|-------|-------|---------|-------|--------|---|--------|-------|
| Trypsin - Sus scrofa (Pig). | IPI:CON_T<br>rypsin S<br>WISS-<br>PROT:P00<br>761 TRYP<br>_PIG,sp P<br>00761 TR<br>YP_PIG,tr<br> CSIWV5 <br>C5IWV5_<br>PIG,tr F1S<br>RS2 F1SR<br>S2_PIG | IGEH<br>NIDV<br>LEG<br>NEqF<br>INAA<br>k | 94% | 50.8 | 55.34314 | Ref | 0.32  | -0.34 | 0.077 | -0.11  | -0.06 | -0.07 | 0.27  | 20000 | 20400   | 14100 | 21100 | 20400   | 18400 | 19200 | 24000   | 705.9 | 2819.5 | 4 | 0.0253 | 8.961 |
| Trypsin - Sus scrofa (Pig). | IPI:CON_T<br>rypsin S<br>WISS-<br>PROT:P00<br>761 TRYP<br>_PIG,sp P<br>00761 TR<br>YP_PIG,tr<br> CSIWV5 <br>C5IWV5_<br>PIG,tr F1S<br>RS2 F1SR<br>S2_PIG | IGEH<br>NIDV<br>LEG<br>NEQ<br>FlnA<br>Ak | 78% | 38.8 | 55.33054 | Ref | 0.076 | -0.13 | -0.04 | -0.029 | 0.094 | -0.22 | 0.41  | 10000 | 8960    | 8430  | 10100 | 11200   | 10600 | 8900  | 13800   | 705.9 | 2819.5 | 4 | 0.0196 | 6.962 |
| Trypsin - Sus scrofa (Pig). | IPI:CON_T<br>rypsin S<br>WISS-<br>PROT:P00<br>761 TRYP<br>_PIG,sp P<br>00761 TR<br>YP_PIG,tr<br> CSIWV5 <br>C5IWV5_<br>PIG,tr F1S<br>RS2 F1SR<br>S2_PIG | ISSP<br>ATLN<br>SR                       | 91% | 42.7 | 52.03449 | Ref | 0.23  | 0.15  | 0.009 | -0.16  | -0.03 | -0.03 | 9E-04 | 1E+06 | 1070000 | 1E+06 | 1E+06 | 1100000 | 1E+06 | 1E+06 | 1120000 | 675.4 | 1348.8 | 2 | 0.0104 | 7.676 |

|                             |                                                                                                                                   |                    |     |      |          |     |      |       |       |        |       |       |       |       |        |       |        |        |       |       |        |       |        |   |        |       |
|-----------------------------|-----------------------------------------------------------------------------------------------------------------------------------|--------------------|-----|------|----------|-----|------|-------|-------|--------|-------|-------|-------|-------|--------|-------|--------|--------|-------|-------|--------|-------|--------|---|--------|-------|
| Trypsin - Sus scrofa (Pig). | IPI:CON_T<br>rypsin S<br>WISS-<br>PROT:P00<br>761 TRYP<br>_PIG,sp P<br>00761 TR<br>YP_PIG,tr<br> C5IWV5 <br>C5IWV5_<br>PIG,tr F1S | ISSP<br>ATLN<br>SR | 89% | 41.6 | 52.03735 | Ref | 0.18 | 0.035 | 0.017 | -0.17  | -0.12 | 0.1   | -0.02 | 6E+05 | 532000 | 5E+05 | 580000 | 564000 | 5E+05 | 6E+05 | 563000 | 675.4 | 1348.7 | 2 | 0.0133 | 9.839 |
| Trypsin - Sus scrofa (Pig). | IPI:CON_T<br>rypsin S<br>WISS-<br>PROT:P00<br>761 TRYP<br>_PIG,sp P<br>00761 TR<br>YP_PIG,tr<br> C5IWV5 <br>C5IWV5_<br>PIG,tr F1S | ISSP<br>ATLN<br>SR | 68% | 34.5 | 52.2753  | Ref | 0.11 | 0.055 | 0.092 | -0.029 | -0.02 | 0.1   | 0.017 | 15900 | 15400  | 16100 | 18600  | 18800  | 16600 | 18800 | 17600  | 675.4 | 1348.8 | 2 | 0.0077 | 5.676 |
| Trypsin - Sus scrofa (Pig). | IPI:CON_T<br>rypsin S<br>WISS-<br>PROT:P00<br>761 TRYP<br>_PIG,sp P<br>00761 TR<br>YP_PIG,tr<br> C5IWV5 <br>C5IWV5_<br>PIG,tr F1S | ISSP<br>ATLN<br>SR | 59% | 32.8 | 52.27393 | Ref | 0.21 | 0.072 | 0.066 | -0.18  | -0.09 | 0.077 | 0.027 | 34500 | 33000  | 32600 | 36400  | 33900  | 31600 | 36900 | 35400  | 675.4 | 1348.8 | 2 | 0.0085 | 6.313 |

|                             |                                                                                                                                   |                    |     |      |          |     |       |       |       |        |       |       |       |       |        |       |        |        |       |       |        |       |        |   |        |       |
|-----------------------------|-----------------------------------------------------------------------------------------------------------------------------------|--------------------|-----|------|----------|-----|-------|-------|-------|--------|-------|-------|-------|-------|--------|-------|--------|--------|-------|-------|--------|-------|--------|---|--------|-------|
| Trypsin - Sus scrofa (Pig). | IPI:CON_T<br>rypsin S<br>WISS-<br>PROT:P00<br>761 TRYP<br>_PIG,sp P<br>00761 TR<br>YP_PIG,tr<br> C5IWV5 <br>C5IWV5_<br>PIG,tr F1S | ISSP<br>ATLn<br>SR | 85% | 39.4 | 52.09574 | Ref | 0.27  | -0.06 | 0.032 | -0.17  | -0.1  | 0.13  | 0.096 | 4300  | 4370   | 3760  | 4510   | 4310   | 3970  | 4850  | 4700   | 675.9 | 1349.7 | 2 | 0.0307 | 22.75 |
| Trypsin - Sus scrofa (Pig). | IPI:CON_T<br>rypsin S<br>WISS-<br>PROT:P00<br>761 TRYP<br>_PIG,sp P<br>00761 TR<br>YP_PIG,tr<br> C5IWV5 <br>C5IWV5_<br>PIG,tr F1S | ISSP<br>ATLn<br>SR | 74% | 35.7 | 52.23991 | Ref | 0.12  | 0.04  | 0.16  | -0.14  | 0.11  | -0.04 | -0.08 | 12000 | 10600  | 11000 | 13300  | 12000  | 12400 | 11700 | 11300  | 675.9 | 1349.7 | 2 | 0.0117 | 8.656 |
| Trypsin - Sus scrofa (Pig). | IPI:CON_T<br>rypsin S<br>WISS-<br>PROT:P00<br>761 TRYP<br>_PIG,sp P<br>00761 TR<br>YP_PIG,tr<br> C5IWV5 <br>C5IWV5_<br>PIG,tr F1S | ISSP<br>ATLn<br>SR | 95% | 48.4 | 52.24522 | Ref | 0.093 | 0.002 | 0.11  | -0.042 | 0.049 | -0.05 | 0.11  | 1E+05 | 102000 | 1E+05 | 126000 | 125000 | 1E+05 | 1E+05 | 126000 | 675.9 | 1349.7 | 2 | 0.0115 | 8.478 |

|                             |                                                                                                                                                         |                            |     |      |          |     |       |       |       |        |       |       |       |       |        |       |       |         |       |       |         |       |        |   |        |       |
|-----------------------------|---------------------------------------------------------------------------------------------------------------------------------------------------------|----------------------------|-----|------|----------|-----|-------|-------|-------|--------|-------|-------|-------|-------|--------|-------|-------|---------|-------|-------|---------|-------|--------|---|--------|-------|
| Trypsin - Sus scrofa (Pig). | IPI:CON_T<br>rypsin S<br>WISS-<br>PROT:P00<br>761 TRYP<br>_PIG,sp P<br>00761 TR<br>YP_PIG,tr<br> C5IWV5 <br>C5IWV5_<br>PIG,tr F1S<br>RS2 F1SR<br>S2_PIG | ISSP<br>ATLn<br>SR         | 81% | 38.1 | 52.29767 | Ref | 0.098 | 0.26  | 0.11  | -0.1   | 0.022 | -0.04 | -0.06 | 1E+06 | 931000 | 1E+06 | 1E+06 | 1090000 | 1E+06 | 1E+06 | 1010000 | 675.9 | 1349.7 | 2 | 0.0108 | 8.019 |
| Trypsin - Sus scrofa (Pig). | IPI:CON_T<br>rypsin S<br>WISS-<br>PROT:P00<br>761 TRYP<br>_PIG,sp P<br>00761 TR<br>YP_PIG,tr<br> C5IWV5 <br>C5IWV5_<br>PIG,tr F1S<br>RS2 F1SR<br>S2_PIG | ISSP<br>ATLn<br>SR         | 62% | 33.4 | 52.25888 | Ref | 0.17  | 0.008 | -0.02 | -0.084 | 0.12  | -0.04 | -0.07 | 26900 | 23400  | 22700 | 25000 | 26400   | 26600 | 24900 | 24100   | 675.9 | 1349.7 | 2 | 0.0107 | 7.93  |
| Trypsin - Sus scrofa (Pig). | IPI:CON_T<br>rypsin S<br>WISS-<br>PROT:P00<br>761 TRYP<br>_PIG,sp P<br>00761 TR<br>YP_PIG,tr<br> C5IWV5 <br>C5IWV5_<br>PIG,tr F1S<br>RS2 F1SR<br>S2_PIG | sSGS<br>SYPS<br>LLQc<br>Lk | 73% | 38.2 | 54.19979 | Ref | 0.13  | 0.02  | 0.09  | 0.098  | -0.09 | 0.1   | 0.062 | 707   | 749    | 752   | 886   | 981     | 754   | 896   | 866     | 708.7 | 2123.1 | 3 | 0.0123 | 5.796 |

|                             |                                                                                                                                                         |              |     |      |          |     |                                          |       |      |       |       |       |       |       |                                       |       |        |         |       |       |         |       |        |   |        |       |
|-----------------------------|---------------------------------------------------------------------------------------------------------------------------------------------------------|--------------|-----|------|----------|-----|------------------------------------------|-------|------|-------|-------|-------|-------|-------|---------------------------------------|-------|--------|---------|-------|-------|---------|-------|--------|---|--------|-------|
| Trypsin - Sus scrofa (Pig). | IPI:CON_T<br>rypsin S<br>WISS-<br>PROT:P00<br>761 TRYP<br>_PIG,sp P<br>00761 TR<br>YP_PIG,tr<br> C5IWV5 <br>C5IWV5_<br>PIG,tr F1S<br>RS2 F1SR<br>S2_PIG | vATV<br>SLPR | 59% | 31.2 | 50.57114 | Ref | 0.19                                     | 0.044 | 0.22 | -0.22 | -0.04 | 0.068 | 0.007 | 4E+06 | 4250000                               | 4E+06 | 5E+06  | 4300000 | 4E+06 | 5E+06 | 4540000 | 573.9 | 1145.7 | 2 | 0.0089 | 7.745 |
| Trypsin - Sus scrofa (Pig). | IPI:CON_T<br>rypsin S<br>WISS-<br>PROT:P00<br>761 TRYP<br>_PIG,sp P<br>00761 TR<br>YP_PIG,tr<br> C5IWV5 <br>C5IWV5_<br>PIG,tr F1S<br>RS2 F1SR<br>S2_PIG | vATV<br>SLPR | 70% | 33.4 | 50.57114 | Ref | 0.16                                     | 0.025 | 0.12 | -0.16 | 0.003 | 0.14  | -0.07 | 1E+05 | 111000                                | 1E+05 | 132000 | 119000  | 1E+05 | 1E+05 | 115000  | 573.9 | 1145.7 | 2 | 0.0088 | 7.64  |
| Trypsin - Sus scrofa (Pig). | IPI:CON_T<br>rypsin S<br>WISS-<br>PROT:P00<br>761 TRYP<br>_PIG,sp P<br>00761 TR<br>YP_PIG,tr<br> C5IWV5 <br>C5IWV5_<br>PIG,tr F1S<br>RS2 F1SR<br>S2_PIG | vATV<br>SLPR | 95% | 50.9 | 50.57114 | Ref | Value<br>Missing<br>(-<br>1.2373<br>568) | 0.47  | 0.21 | -0.19 | -0.07 | -0.2  | 0.046 | 84100 | Value<br>Missing (-<br>1.237356<br>8) | 72700 | 68200  | 57100   | 54100 | 51800 | 60800   | 382.9 | 1145.7 | 3 | 0.0086 | 7.524 |

|                             |                                                                                                                                                         |              |     |      |          |     |       |       |       |       |       |      |       |       |         |       |       |         |       |       |         |       |        |   |        |       |
|-----------------------------|---------------------------------------------------------------------------------------------------------------------------------------------------------|--------------|-----|------|----------|-----|-------|-------|-------|-------|-------|------|-------|-------|---------|-------|-------|---------|-------|-------|---------|-------|--------|---|--------|-------|
| Trypsin - Sus scrofa (Pig). | IPI:CON_T<br>rypsin S<br>WISS-<br>PROT:P00<br>761 TRYP<br>_PIG,sp P<br>00761 TR<br>YP_PIG,tr<br> C5IWV5 <br>C5IWV5_<br>PIG,tr F1S<br>RS2 F1SR<br>S2_PIG | vATV<br>SLPR | 95% | 57.7 | 50.56596 | Ref | -0.25 | -0.07 | 0.055 | 0.26  | -0.26 | 0.19 | -0.12 | 55700 | 31900   | 39400 | 48000 | 60900   | 37200 | 53000 | 42400   | 382.9 | 1145.7 | 3 | 0.0085 | 7.445 |
| Trypsin - Sus scrofa (Pig). | IPI:CON_T<br>rypsin S<br>WISS-<br>PROT:P00<br>761 TRYP<br>_PIG,sp P<br>00761 TR<br>YP_PIG,tr<br> C5IWV5 <br>C5IWV5_<br>PIG,tr F1S<br>RS2 F1SR<br>S2_PIG | vATV<br>SLPR | 73% | 33.7 | 50.19457 | Ref | 0.17  | 0.084 | 0.016 | -0.16 | 0.013 | 0.07 | 0.022 | 2E+06 | 2260000 | 2E+06 | 2E+06 | 2410000 | 2E+06 | 3E+06 | 2470000 | 573.9 | 1145.7 | 2 | 0.0068 | 5.949 |
| Trypsin - Sus scrofa (Pig). | IPI:CON_T<br>rypsin S<br>WISS-<br>PROT:P00<br>761 TRYP<br>_PIG,sp P<br>00761 TR<br>YP_PIG,tr<br> C5IWV5 <br>C5IWV5_<br>PIG,tr F1S<br>RS2 F1SR<br>S2_PIG | vATV<br>SLPR | 52% | 30.1 | 50.5816  | Ref | 0.16  | 0.07  | 0.076 | -0.07 | -0.03 | 0.06 | 0.01  | 42000 | 40700   | 41600 | 46900 | 46700   | 42000 | 46600 | 44700   | 573.9 | 1145.7 | 2 | 0.0102 | 8.914 |

|                                                                       |                                                                                                                                                         |                         |     |      |          |     |       |       |       |        |       |       |       |       |       |       |       |       |       |       |       |       |        |   |        |       |
|-----------------------------------------------------------------------|---------------------------------------------------------------------------------------------------------------------------------------------------------|-------------------------|-----|------|----------|-----|-------|-------|-------|--------|-------|-------|-------|-------|-------|-------|-------|-------|-------|-------|-------|-------|--------|---|--------|-------|
| Trypsin - Sus scrofa (Pig).                                           | IPI:CON_T<br>rypsin S<br>WISS-<br>PROT:P00<br>761 TRYP<br>_PIG,sp P<br>00761 TR<br>YP_PIG,tr<br> CSIWV5 <br>CSIWV5_<br>PIG,tr F1S<br>RS2 F1SR<br>S2_PIG | vATV<br>SLPR            | 78% | 36.2 | 50.56238 | Ref | -0.15 | 0.095 | -0.01 | -0.1   | 0.17  | -0.16 | 0.22  | 5460  | 3810  | 4890  | 5090  | 5290  | 5560  | 4630  | 5960  | 382.9 | 1145.7 | 3 | 0.0084 | 7.367 |
| Trypsin - Sus scrofa (Pig).                                           | IPI:CON_T<br>rypsin S<br>WISS-<br>PROT:P00<br>761 TRYP<br>_PIG,sp P<br>00761 TR<br>YP_PIG,tr<br> CSIWV5 <br>CSIWV5_<br>PIG,tr F1S<br>RS2 F1SR<br>S2_PIG | vATV<br>SLPR            | 51% | 29.9 | 50.56238 | Ref | 0.39  | 0.19  | -0    | -0.22  | 0.025 | 0.085 | -0.17 | 2120  | 2600  | 2450  | 2410  | 2290  | 2370  | 2580  | 2150  | 573.9 | 1145.7 | 2 | 0.0082 | 7.117 |
| Protein disulfide-<br>isomerase OS=Bos<br>taurus GN=P4HB<br>PE=1 SV=1 | sp P0530<br>7 PDIA1_<br>BOVIN,tr <br>A6H7J6 A<br>6H7J6_BO<br>VIN                                                                                        | aLAP<br>EYAk            | 87% | 38.9 | 50.86933 | Ref | -0.05 | 0.089 | -0.12 | -0.2   | -0.15 | -0.01 | -0.25 | 18000 | 15900 | 19000 | 18400 | 19300 | 17400 | 20100 | 16800 | 735.9 | 1469.9 | 2 | 0.0033 | 2.22  |
| Protein disulfide-<br>isomerase OS=Bos<br>taurus GN=P4HB<br>PE=1 SV=1 | sp P0530<br>7 PDIA1_<br>BOVIN,tr <br>A6H7J6 A<br>6H7J6_BO<br>VIN                                                                                        | gNF<br>DEAL<br>AAH<br>k | 95% | 59.2 | 53.43972 | Ref | -0.34 | 0.23  | -0.01 | -0.2   | 0.035 | -0.33 | -0.16 | 5920  | 4210  | 6800  | 6470  | 6260  | 6420  | 5210  | 5830  | 891   | 1780   | 2 | 0.0156 | 8.762 |
| Protein disulfide-<br>isomerase OS=Bos<br>taurus GN=P4HB<br>PE=1 SV=1 | sp P0530<br>7 PDIA1_<br>BOVIN,tr <br>A6H7J6 A<br>6H7J6_BO<br>VIN                                                                                        | gNF<br>DEAL<br>AAH<br>k | 95% | 52.5 | 53.39366 | Ref | -0.2  | -0.17 | -0.05 | -0.033 | 0.16  | -0.26 | -0.16 | 41000 | 32600 | 36000 | 44000 | 49000 | 48800 | 38300 | 40500 | 594.3 | 1780   | 3 | 0.0143 | 8.018 |

|                                                             |                                               |                   |     |      |          |     |        |       |       |        |       |       |       |       |       |       |       |       |       |       |       |       |        |   |        |       |
|-------------------------------------------------------------|-----------------------------------------------|-------------------|-----|------|----------|-----|--------|-------|-------|--------|-------|-------|-------|-------|-------|-------|-------|-------|-------|-------|-------|-------|--------|---|--------|-------|
| Protein disulfide-isomerase OS=Bos taurus GN=P4HB PE=1 SV=1 | sp P05307 PDIA1_BOVIN, tr A6H7J6 A6H7J6_BOVIN | gnFDEALAAHk       | 95% | 51.7 | 53.4314  | Ref | -0.037 | -0.2  | 0.083 | -0.079 | -0    | -0.33 | -0.02 | 49500 | 48000 | 46500 | 63500 | 62600 | 57500 | 47800 | 59200 | 594.3 | 1780   | 3 | 0.0174 | 9.753 |
| Protein disulfide-isomerase OS=Bos taurus GN=P4HB PE=1 SV=1 | sp P05307 PDIA1_BOVIN, tr A6H7J6 A6H7J6_BOVIN | gnFDEALAAHk       | 69% | 36.3 | 53.38158 | Ref | -0.066 | -0.07 | 0.048 | -0.1   | -0.23 | 0.08  | -0.12 | 14300 | 14800 | 16000 | 19500 | 19400 | 15500 | 20000 | 17400 | 594.7 | 1780.9 | 3 | 0.0188 | 10.58 |
| Protein disulfide-isomerase OS=Bos taurus GN=P4HB PE=1 SV=1 | sp P05307 PDIA1_BOVIN, tr A6H7J6 A6H7J6_BOVIN | hNQLPLVIEFTEQTAPk | 79% | 39.7 | 53.80213 | Ref | -0.12  | -0.19 | 0.014 | -0.056 | -0.21 | 0.092 | -0.23 | 2030  | 1700  | 1750  | 2270  | 2390  | 1870  | 2410  | 1910  | 858.5 | 2572.4 | 3 | 0.0154 | 5.972 |
| Protein disulfide-isomerase OS=Bos taurus GN=P4HB PE=1 SV=1 | sp P05307 PDIA1_BOVIN, tr A6H7J6 A6H7J6_BOVIN | hNQLPLVIEFTEQTAPk | 87% | 41.7 | 53.85225 | Ref | -0.089 | -0.05 | -0.09 | -0.23  | -0.44 | 0.18  | -0.15 | 3000  | 2390  | 2670  | 2900  | 2910  | 2200  | 3530  | 2780  | 644.1 | 2572.4 | 4 | 0.0172 | 6.686 |
| Protein disulfide-isomerase OS=Bos taurus GN=P4HB PE=1 SV=1 | sp P05307 PDIA1_BOVIN, tr A6H7J6 A6H7J6_BOVIN | iLEFFGLk          | 88% | 40.6 | 50.15616 | Ref | -0.081 | -0.09 | -0.25 | -0.27  | -0.47 | -0.05 | 0.31  | 4010  | 3200  | 3450  | 3460  | 3760  | 2870  | 4010  | 5090  | 525.7 | 1574   | 3 | 0.0174 | 11.04 |
| Protein disulfide-isomerase OS=Bos taurus GN=P4HB PE=1 SV=1 | sp P05307 PDIA1_BOVIN, tr A6H7J6 A6H7J6_BOVIN | iLEFFGLk          | 59% | 29.9 | 49.35306 | Ref | -0.025 | -0.1  | -0.09 | -0.11  | -0.55 | 0.066 | -0.37 | 2390  | 1680  | 1730  | 1950  | 2120  | 1370  | 2190  | 1610  | 788   | 1574   | 2 | 0.0053 | 3.393 |



|                                                             |                                               |                             |     |      |          |     |        |       |       |       |       |       |       |       |      |      |       |      |       |       |      |       |        |   |        |       |
|-------------------------------------------------------------|-----------------------------------------------|-----------------------------|-----|------|----------|-----|--------|-------|-------|-------|-------|-------|-------|-------|------|------|-------|------|-------|-------|------|-------|--------|---|--------|-------|
| Protein disulfide-isomerase OS=Bos taurus GN=P4HB PE=1 SV=1 | sp P05307 PDIA1_BOVIN, tr A6H7J6 A6H7J6_BOVIN | iLEFF<br>GLK                | 59% | 30.2 | 49.30531 | Ref | -0.042 | -0.14 | -0.14 | -0.38 | -0.15 | -0.22 | 0.23  | 782   | 651  | 658  | 741   | 693  | 707   | 707   | 958  | 525.7 | 1574   | 3 | 0.0024 | 1.511 |
| Protein disulfide-isomerase OS=Bos taurus GN=P4HB PE=1 SV=1 | sp P05307 PDIA1_BOVIN, tr A6H7J6 A6H7J6_BOVIN | iLFIFI<br>DSD<br>HTD<br>NQR | 54% | 34   | 53.94569 | Ref | 0.26   | -0.01 | -0.57 | -0.22 | -0.44 | 0.074 | 0.092 | 251   | 281  | 253  | 192   | 270  | 203   | 303   | 304  | 713.4 | 2137.1 | 3 | 0.0068 | 3.161 |
| Protein disulfide-isomerase OS=Bos taurus GN=P4HB PE=1 SV=1 | sp P05307 PDIA1_BOVIN, tr A6H7J6 A6H7J6_BOVIN | iLFIFI<br>DSD<br>HTD<br>NQR | 95% | 60.5 | 53.90458 | Ref | 0.026  | -0.24 | 0.059 | -0.32 | -0.02 | 0.1   | -0.43 | 258   | 229  | 206  | 285   | 242  | 259   | 295   | 203  | 713.4 | 2137.1 | 3 | 0.0112 | 5.223 |
| Protein disulfide-isomerase OS=Bos taurus GN=P4HB PE=1 SV=1 | sp P05307 PDIA1_BOVIN, tr A6H7J6 A6H7J6_BOVIN | iTEFc<br>HR                 | 72% | 32.3 | 48.60871 | Ref | 0.08   | -0.11 | -0.04 | -0.34 | -0.05 | -0.03 | -0.28 | 9870  | 9140 | 8720 | 10200 | 9170 | 9770  | 10300 | 8650 | 419.2 | 1254.6 | 3 | 0.0063 | 5.042 |
| Protein disulfide-isomerase OS=Bos taurus GN=P4HB PE=1 SV=1 | sp P05307 PDIA1_BOVIN, tr A6H7J6 A6H7J6_BOVIN | iTEFc<br>HR                 | 83% | 35.9 | 48.38541 | Ref | 0.0073 | -0.16 | 0.074 | -0.34 | -0.08 | 0.029 | -0.26 | 7740  | 7010 | 6750 | 8940  | 7380 | 7740  | 8710  | 7080 | 419.2 | 1254.6 | 3 | 0.0091 | 7.24  |
| Protein disulfide-isomerase OS=Bos taurus GN=P4HB PE=1 SV=1 | sp P05307 PDIA1_BOVIN, tr A6H7J6 A6H7J6_BOVIN | iTEFc<br>HR                 | 79% | 34.2 | 48.38276 | Ref | 0.012  | -0.24 | 0.11  | -0.37 | 0.088 | -0.11 | -0.28 | 10000 | 8860 | 8050 | 11500 | 9120 | 10900 | 9990  | 8770 | 419.2 | 1254.6 | 3 | 0.0082 | 6.499 |

|                                                             |                                               |              |     |      |          |     |        |       |       |        |       |       |       |       |       |       |       |       |       |       |       |       |        |   |        |       |
|-------------------------------------------------------------|-----------------------------------------------|--------------|-----|------|----------|-----|--------|-------|-------|--------|-------|-------|-------|-------|-------|-------|-------|-------|-------|-------|-------|-------|--------|---|--------|-------|
| Protein disulfide-isomerase OS=Bos taurus GN=P4HB PE=1 SV=1 | sp P05307 PDIA1_BOVIN, tr A6H7J6 A6H7J6_BOVIN | IITLE EEM Tk | 80% | 39.4 | 53.1219  | Ref | 0.0049 | -0.1  | -0.08 | -0.2   | -0.14 | -0.04 | -0.11 | 11700 | 10800 | 10900 | 12400 | 12600 | 11400 | 12800 | 12100 | 605.7 | 1814   | 3 | 0.022  | 12.13 |
| Protein disulfide-isomerase OS=Bos taurus GN=P4HB PE=1 SV=1 | sp P05307 PDIA1_BOVIN, tr A6H7J6 A6H7J6_BOVIN | IITLE EEM Tk | 94% | 47.4 | 53.0936  | Ref | -0.042 | -0.02 | -0.06 | -0.086 | -0.21 | -0.04 | -0.19 | 7100  | 6480  | 7160  | 7800  | 8430  | 6770  | 7930  | 7100  | 908   | 1814   | 2 | 0.019  | 10.47 |
| Protein disulfide-isomerase OS=Bos taurus GN=P4HB PE=1 SV=1 | sp P05307 PDIA1_BOVIN, tr A6H7J6 A6H7J6_BOVIN | IITLE EEM Tk | 88% | 43.9 | 53.04566 | Ref | -0.066 | 0.15  | -0.18 | -0.12  | -0.22 | -0.14 | -0.24 | 3880  | 3120  | 3920  | 3500  | 4020  | 3280  | 3630  | 3360  | 605.7 | 1814   | 3 | 0.0175 | 9.618 |
| Protein disulfide-isomerase OS=Bos taurus GN=P4HB PE=1 SV=1 | sp P05307 PDIA1_BOVIN, tr A6H7J6 A6H7J6_BOVIN | IITLE EEM Tk | 86% | 42.2 | 52.97237 | Ref | 0.17   | -0.05 | -0.11 | -0.28  | -0.35 | 0.035 | -0.13 | 1240  | 1280  | 1190  | 1280  | 1250  | 1050  | 1430  | 1270  | 605.7 | 1814   | 3 | 0.0092 | 5.072 |
| Protein disulfide-isomerase OS=Bos taurus GN=P4HB PE=1 SV=1 | sp P05307 PDIA1_BOVIN, tr A6H7J6 A6H7J6_BOVIN | IITLE EEM Tk | 87% | 42.5 | 53.02628 | Ref | 0.11   | -0.23 | -0.13 | -0.036 | -0.18 | -0.27 | -0.22 | 800   | 674   | 578   | 693   | 817   | 647   | 634   | 649   | 605.7 | 1814   | 3 | 0.0138 | 7.601 |
| Protein disulfide-isomerase OS=Bos taurus GN=P4HB PE=1 SV=1 | sp P05307 PDIA1_BOVIN, tr A6H7J6 A6H7J6_BOVIN | ILDFl k      | 68% | 28.2 | 45.94481 | Ref | 0.022  | -0.12 | -0.08 | -0.14  | -0.3  | 0.036 | -0.33 | 2320  | 1900  | 1870  | 2170  | 2290  | 1790  | 2350  | 1810  | 678.9 | 1355.9 | 2 | 0.0029 | 2.134 |

|                                                             |                                               |                  |     |      |          |     |        |       |       |       |       |       |       |       |       |       |        |        |       |       |        |       |        |   |        |       |
|-------------------------------------------------------------|-----------------------------------------------|------------------|-----|------|----------|-----|--------|-------|-------|-------|-------|-------|-------|-------|-------|-------|--------|--------|-------|-------|--------|-------|--------|---|--------|-------|
| Protein disulfide-isomerase OS=Bos taurus GN=P4HB PE=1 SV=1 | sp P05307 PDIA1_BOVIN, tr A6H7J6 A6H7J6_BOVIN | mDSTAN EVEA Vkl  | 95% | 52   | 53.24254 | Ref | -0.28  | -0.22 | 0.041 | 0.085 | -0.14 | -0.17 | -0.08 | 1E+05 | 74700 | 84700 | 114000 | 129000 | 96300 | 98300 | 104000 | 634.7 | 1901   | 3 | 0.0178 | 9.371 |
| Protein disulfide-isomerase OS=Bos taurus GN=P4HB PE=1 SV=1 | sp P05307 PDIA1_BOVIN, tr A6H7J6 A6H7J6_BOVIN | mDSTAN EVEA Vkl  | 95% | 61.4 | 53.24391 | Ref | -0.37  | 0.13  | -0.15 | -0.16 | 0.031 | -0.11 | -0.21 | 21700 | 14100 | 21600 | 20000  | 21900  | 21900 | 20700 | 19200  | 951.5 | 1901   | 2 | 0.016  | 8.395 |
| Protein disulfide-isomerase OS=Bos taurus GN=P4HB PE=1 SV=1 | sp P05307 PDIA1_BOVIN, tr A6H7J6 A6H7J6_BOVIN | mDSTAN E VEA Vkl | 95% | 71.4 | 53.07898 | Ref | -0.26  | 0.12  | 2E-04 | -0.2  | -0.02 | -0.15 | -0.08 | 8610  | 7110  | 10100 | 10400  | 9960   | 9880  | 9450  | 9830   | 952   | 1902   | 2 | 0.0143 | 7.491 |
| Protein disulfide-isomerase OS=Bos taurus GN=P4HB PE=1 SV=1 | sp P05307 PDIA1_BOVIN, tr A6H7J6 A6H7J6_BOVIN | mDSTAN E VEA Vkl | 94% | 50.5 | 53.13304 | Ref | -0.18  | -0.19 | -0.04 | -0.2  | 0.032 | -0.22 | -0.13 | 31700 | 22000 | 23700 | 29500  | 29200  | 29900 | 26300 | 27600  | 635   | 1902   | 3 | 0.0129 | 6.754 |
| Protein disulfide-isomerase OS=Bos taurus GN=P4HB PE=1 SV=1 | sp P05307 PDIA1_BOVIN, tr A6H7J6 A6H7J6_BOVIN | nFEE VAF DEK     | 90% | 43.1 | 53.00837 | Ref | -0.034 | 0.018 | -0.04 | -0.13 | -0.26 | -0.13 | -0.46 | 8330  | 6170  | 6940  | 7480   | 7750   | 6200  | 7090  | 5600   | 918.5 | 1834.9 | 2 | 0.0096 | 5.24  |
| Protein disulfide-isomerase OS=Bos taurus GN=P4HB PE=1 SV=1 | sp P05307 PDIA1_BOVIN, tr A6H7J6 A6H7J6_BOVIN | nNFE GEV Tk      | 92% | 44.9 | 52.79092 | Ref | 0.011  | 0.017 | -0.2  | -0.12 | -0.33 | 0.043 | -0.32 | 43100 | 35400 | 38500 | 37200  | 43400  | 32700 | 44200 | 34000  | 823.4 | 1644.9 | 2 | 0.0191 | 11.62 |

|                                                             |                                               |                   |     |      |          |     |        |       |       |        |       |       |       |       |       |       |       |       |       |       |       |       |        |   |        |       |
|-------------------------------------------------------------|-----------------------------------------------|-------------------|-----|------|----------|-----|--------|-------|-------|--------|-------|-------|-------|-------|-------|-------|-------|-------|-------|-------|-------|-------|--------|---|--------|-------|
| Protein disulfide-isomerase OS=Bos taurus GN=P4HB PE=1 SV=1 | sp P05307 PDIA1_BOVIN, tr A6H7J6 A6H7J6_BOVIN | nNFE<br>GEV<br>Tk | 64% | 34.2 | 52.68203 | Ref | 0.046  | 0.007 | -0.02 | -0.22  | -0.2  | -0.09 | -0.47 | 15800 | 13000 | 13700 | 15100 | 14500 | 12900 | 14500 | 11000 | 823.9 | 1645.9 | 2 | 0.0128 | 7.773 |
| Protein disulfide-isomerase OS=Bos taurus GN=P4HB PE=1 SV=1 | sp P05307 PDIA1_BOVIN, tr A6H7J6 A6H7J6_BOVIN | THIL<br>LFLP<br>k | 83% | 34.7 | 48.4279  | Ref | -0.14  | -0.04 | -0.11 | -0.095 | -0.14 | 0.1   | -0.1  | 1300  | 1210  | 1400  | 1510  | 1680  | 1420  | 1750  | 1510  | 693.4 | 1384.9 | 2 | 0.0072 | 5.184 |
| Protein disulfide-isomerase OS=Bos taurus GN=P4HB PE=1 SV=1 | sp P05307 PDIA1_BOVIN, tr A6H7J6 A6H7J6_BOVIN | THIL<br>LFLP<br>k | 88% | 37.4 | 48.58796 | Ref | -0.021 | -0.01 | -0.22 | -0.12  | -0.21 | 0.21  | -0.14 | 997   | 1040  | 1140  | 1110  | 1310  | 1070  | 1500  | 1170  | 693.4 | 1384.9 | 2 | 0.0092 | 6.67  |
| Protein disulfide-isomerase OS=Bos taurus GN=P4HB PE=1 SV=1 | sp P05307 PDIA1_BOVIN, tr A6H7J6 A6H7J6_BOVIN | THILL<br>FLPk     | 90% | 37.8 | 47.4538  | Ref | -0.074 | -0.39 | -0.1  | -0.19  | -0.15 | 0.092 | 0.043 | 1250  | 1050  | 913   | 1250  | 1290  | 1170  | 1440  | 1380  | 423.3 | 1689.1 | 4 | 0.022  | 13.01 |
| Protein disulfide-isomerase OS=Bos taurus GN=P4HB PE=1 SV=1 | sp P05307 PDIA1_BOVIN, tr A6H7J6 A6H7J6_BOVIN | THILL<br>FLPk     | 91% | 40   | 46.61519 | Ref | 0.094  | -0.07 | -0.15 | -0.16  | -0.2  | -0.08 | -0.25 | 12400 | 11200 | 10800 | 11500 | 12600 | 10700 | 12200 | 10700 | 564   | 1689.1 | 3 | 0.0115 | 6.825 |
| Protein disulfide-isomerase OS=Bos taurus GN=P4HB PE=1 SV=1 | sp P05307 PDIA1_BOVIN, tr A6H7J6 A6H7J6_BOVIN | THILL<br>FLPk     | 95% | 44.9 | 46.61387 | Ref | 0.051  | -0.02 | -0.19 | -0.16  | -0.32 | 0.066 | -0.31 | 3990  | 3400  | 3510  | 3510  | 3940  | 3090  | 4210  | 3220  | 845.5 | 1689.1 | 2 | 0.0106 | 6.265 |

|                                                             |                                               |            |     |      |          |     |                           |                            |                            |                            |       |       |       |       |                           |                            |                            |                            |       |       |        |       |        |   |        |       |
|-------------------------------------------------------------|-----------------------------------------------|------------|-----|------|----------|-----|---------------------------|----------------------------|----------------------------|----------------------------|-------|-------|-------|-------|---------------------------|----------------------------|----------------------------|----------------------------|-------|-------|--------|-------|--------|---|--------|-------|
| Protein disulfide-isomerase OS=Bos taurus GN=P4HB PE=1 SV=1 | sp P05307 PDIA1_BOVIN, tr A6H7J6 A6H7J6_BOVIN | tHILL FLPk | 94% | 44.7 | 46.45412 | Ref | 0.093                     | 0.092                      | -0.24                      | -0.16                      | -0.32 | 0.046 | -0.35 | 12700 | 11700                     | 12700                      | 11300                      | 13200                      | 10300 | 13800 | 10500  | 564   | 1689.1 | 3 | 0.0091 | 5.405 |
| Protein disulfide-isomerase OS=Bos taurus GN=P4HB PE=1 SV=1 | sp P05307 PDIA1_BOVIN, tr A6H7J6 A6H7J6_BOVIN | tHILL FLPk | 93% | 42.2 | 47.00418 | Ref | 0.08                      | -0.08                      | -0.15                      | -0.24                      | -0.23 | -0.05 | -0.2  | 4060  | 3530                      | 3420                       | 3660                       | 3800                       | 3340  | 3950  | 3530   | 564   | 1689.1 | 3 | 0.0146 | 8.653 |
| Protein disulfide-isomerase OS=Bos taurus GN=P4HB PE=1 SV=1 | sp P05307 PDIA1_BOVIN, tr A6H7J6 A6H7J6_BOVIN | tHILL FLPk | 95% | 45   | 46.33791 | Ref | 0.11                      | 0.061                      | -0.26                      | -0.19                      | -0.36 | 0.12  | -0.27 | 700   | 675                       | 708                        | 639                        | 738                        | 570   | 833   | 632    | 845.5 | 1689.1 | 2 | 0.008  | 4.75  |
| Protein disulfide-isomerase OS=Bos taurus GN=P4HB PE=1 SV=1 | sp P05307 PDIA1_BOVIN, tr A6H7J6 A6H7J6_BOVIN | tHILL FLPk | 81% | 31   | 46.33791 | Ref | -0.15                     | -0.04                      | -0.16                      | -0.33                      | -0.29 | -0.17 | 0.23  | 1800  | 1330                      | 1560                       | 1600                       | 1570                       | 1410  | 1600  | 2100   | 423.3 | 1689.1 | 4 | 0.0069 | 4.106 |
| Protein disulfide-isomerase OS=Bos taurus GN=P4HB PE=1 SV=1 | sp P05307 PDIA1_BOVIN, tr A6H7J6 A6H7J6_BOVIN | tHILL FLPk | 53% | 24.4 | 46.26833 | Ref | Value Missing (-0.705961) | Value Missing (-0.8236544) | Value Missing (-0.9902493) | Value Missing (-1.1307284) | 0.44  | 0.43  | 0.38  | 101   | Value Missing (-0.705961) | Value Missing (-0.8236544) | Value Missing (-0.9902493) | Value Missing (-1.1307284) | 102   | 106   | 101    | 423.3 | 1689.1 | 4 | 0.0043 | 2.521 |
| Protein disulfide-isomerase OS=Bos taurus GN=P4HB PE=1 SV=1 | sp P05307 PDIA1_BOVIN, tr A6H7J6 A6H7J6_BOVIN | tVID YnGER | 61% | 31.2 | 50.21019 | Ref | -0.18                     | 0.14                       | -0.06                      | -0.15                      | -0.17 | -0.19 | -0.18 | 3E+05 | 199000                    | 3E+05                      | 262000                     | 271000                     | 2E+05 | 2E+05 | 242000 | 686.3 | 1370.7 | 2 | 0.0134 | 9.776 |

|                                                             |                                               |                     |     |      |          |     |        |       |       |        |       |       |       |       |        |       |        |        |       |       |        |       |        |   |        |       |
|-------------------------------------------------------------|-----------------------------------------------|---------------------|-----|------|----------|-----|--------|-------|-------|--------|-------|-------|-------|-------|--------|-------|--------|--------|-------|-------|--------|-------|--------|---|--------|-------|
| Protein disulfide-isomerase OS=Bos taurus GN=P4HB PE=1 SV=1 | sp P05307 PDIA1_BOVIN, tr A6H7J6 A6H7J6_BOVIN | tVIDYnGE R          | 87% | 40.1 | 50.21239 | Ref | -0.016 | -0.28 | 0.39  | -0.21  | -0.15 | -0.46 | -0.18 | 15400 | 13200  | 12000 | 21300  | 15600  | 14200 | 11900 | 14400  | 457.9 | 1370.7 | 3 | 0.0133 | 9.679 |
| Protein disulfide-isomerase OS=Bos taurus GN=P4HB PE=1 SV=1 | sp P05307 PDIA1_BOVIN, tr A6H7J6 A6H7J6_BOVIN | vDATEESD LAQ QYG VR | 95% | 80   | 52.77208 | Ref | -0.11  | 0.052 | -0.27 | 0.046  | -0.22 | -0    | -0.33 | 12100 | 9540   | 11600 | 10400  | 14200  | 10400 | 12600 | 9900   | 1043  | 2084   | 2 | 0.0139 | 6.658 |
| Protein disulfide-isomerase OS=Bos taurus GN=P4HB PE=1 SV=1 | sp P05307 PDIA1_BOVIN, tr A6H7J6 A6H7J6_BOVIN | vDATEESD LAQ QYG VR | 69% | 37.6 | 54.60417 | Ref | 0.032  | 0.12  | -0.23 | -0.14  | -0.27 | -0.08 | -0.32 | 14100 | 11700  | 13500 | 11900  | 14000  | 11100 | 13300 | 11100  | 797.1 | 2388.2 | 3 | 0.0221 | 9.263 |
| Protein disulfide-isomerase OS=Bos taurus GN=P4HB PE=1 SV=1 | sp P05307 PDIA1_BOVIN, tr A6H7J6 A6H7J6_BOVIN | vHSF PTLK           | 56% | 30.9 | 50.62826 | Ref | -0.23  | -0.09 | -0.1  | -0.078 | -0.08 | -0.08 | -0.15 | 1E+05 | 80600  | 96700 | 108000 | 120000 | 1E+05 | 1E+05 | 104000 | 513   | 1535.9 | 3 | 0.015  | 9.771 |
| Protein disulfide-isomerase OS=Bos taurus GN=P4HB PE=1 SV=1 | sp P05307 PDIA1_BOVIN, tr A6H7J6 A6H7J6_BOVIN | vHSF PTLK           | 60% | 31.4 | 50.62176 | Ref | -0.024 | -0.03 | -0.06 | -0.22  | -0.12 | -0.21 | -0.03 | 8390  | 7500   | 8100  | 8930   | 8800   | 8200  | 8090  | 9070   | 769   | 1535.9 | 2 | 0.0145 | 9.441 |
| Protein disulfide-isomerase OS=Bos taurus GN=P4HB PE=1 SV=1 | sp P05307 PDIA1_BOVIN, tr A6H7J6 A6H7J6_BOVIN | vHSF PTLK           | 62% | 31.9 | 50.5294  | Ref | -0.051 | -0.23 | 0.042 | -0.17  | -0.08 | -0.2  | -0.01 | 2E+05 | 213000 | 2E+05 | 276000 | 263000 | 2E+05 | 2E+05 | 266000 | 513   | 1535.9 | 3 | 0.0135 | 8.814 |

|                                                             |                                                                                                                                                                                                                                     |                    |     |      |          |     |       |       |       |       |       |       |       |       |       |       |       |       |       |       |       |       |        |   |        |       |
|-------------------------------------------------------------|-------------------------------------------------------------------------------------------------------------------------------------------------------------------------------------------------------------------------------------|--------------------|-----|------|----------|-----|-------|-------|-------|-------|-------|-------|-------|-------|-------|-------|-------|-------|-------|-------|-------|-------|--------|---|--------|-------|
| Protein disulfide-isomerase OS=Bos taurus GN=P4HB PE=1 SV=1 | sp P05307 PDIA1_BOVIN, tr A6H7J6 A6H7J6_BOVIN                                                                                                                                                                                       | vHSF PTLK          | 60% | 31   | 50.28738 | Ref | -0.14 | 0.017 | -0.1  | -0.16 | -0.13 | -0.09 | -0    | 11500 | 10000 | 12200 | 12600 | 13400 | 11800 | 12800 | 13500 | 769   | 1535.9 | 2 | 0.0047 | 3.078 |
| Tubulin beta chain OS=Homo sapiens GN=TUBB PE=1 SV=2        | 7 TBB5_HUMAN, sp P69893 TBB5_CRI GR, sp P69895 TBB5_MACM U, sp P69897 TBB5_RAT, sp P99024 TBB5_MO USE, sp Q2KJD0 TBB5_BOVIN, sp Q5R943 TBB5_PONAB, sp Q767L7 TBB5_PIG, sp Q7JJU6 TBB5_PANTR, tr E2QSF4 E2QSF4_CA NFA, tr F7E0H3 F7E | aLV DLEP GTM DSV R | 95% | 52.7 | 53.75987 | Ref | -0.06 | -0.11 | 0.057 | -0.12 | -0.04 | -0.18 | 0.051 | 10100 | 8610  | 9050  | 11400 | 11100 | 10200 | 9700  | 11300 | 960.5 | 1919   | 2 | 0.0132 | 6.857 |

|                                                               |                                                                                                                                                                                                                                                                                                                               |                                 |     |      |          |     |       |       |       |        |       |       |       |      |      |      |      |      |      |      |      |       |      |   |        |       |
|---------------------------------------------------------------|-------------------------------------------------------------------------------------------------------------------------------------------------------------------------------------------------------------------------------------------------------------------------------------------------------------------------------|---------------------------------|-----|------|----------|-----|-------|-------|-------|--------|-------|-------|-------|------|------|------|------|------|------|------|------|-------|------|---|--------|-------|
| Tubulin beta chain<br>OS=Homo sapiens<br>GN=TUBB PE=1<br>SV=2 | 7 TBB5_H<br>UMAN,sp<br> P69893 <br>TBB5_CRI<br>GR,sp P6<br>9895 TBB<br>5_MACM<br>U,sp P69<br>897 TBB5<br>_RAT,sp <br>P99024 T<br>BB5_MO<br>USE,sp Q<br>2KID0 TB<br>B5_BOVIN<br>,sp Q5R9<br>43 TBB5_<br>PONAB,sp<br> Q767L7 <br>TBB5_PIG<br>,sp Q7JJU<br>6 TBB5_P<br>ANTR,tr E<br>2QSF4 E2<br>QSF4_CA<br>NFA,tr F7<br>E0H3 F7E | aiLV<br>DLEP<br>GTM<br>DSV<br>R | 74% | 37.3 | 53.72858 | Ref | 0.21  | 0.12  | -0.07 | -0.083 | -0.14 | -0.19 | -0.14 | 5500 | 6230 | 6340 | 6240 | 6820 | 5720 | 5790 | 5940 | 960.5 | 1919 | 2 | 0.0121 | 6.284 |
| Tubulin beta chain<br>OS=Homo sapiens<br>GN=TUBB PE=1<br>SV=2 | 7 TBB5_H<br>UMAN,sp<br> P69893 <br>TBB5_CRI<br>GR,sp P6<br>9895 TBB<br>5_MACM<br>U,sp P69<br>897 TBB5<br>_RAT,sp <br>P99024 T<br>BB5_MO<br>USE,sp Q<br>2KID0 TB<br>B5_BOVIN<br>,sp Q5R9<br>43 TBB5_<br>PONAB,sp<br> Q767L7 <br>TBB5_PIG<br>,sp Q7JJU<br>6 TBB5_P<br>ANTR,tr E<br>2QSF4 E2<br>QSF4_CA<br>NFA,tr F7<br>E0H3 F7E | aiLV<br>DLEP<br>GTM<br>DSV<br>R | 95% | 52.5 | 53.7385  | Ref | 0.051 | -0.03 | -0.03 | -0.1   | -0.17 | -0.14 | -0.07 | 8200 | 7090 | 7270 | 8170 | 8550 | 7150 | 7610 | 7910 | 960.5 | 1919 | 2 | 0.0112 | 5.836 |



|                                                               |                                                                                                                                                                                                                                                                                                                               |                             |     |      |          |     |       |       |       |       |       |      |       |      |       |      |       |       |      |       |      |       |        |   |        |       |
|---------------------------------------------------------------|-------------------------------------------------------------------------------------------------------------------------------------------------------------------------------------------------------------------------------------------------------------------------------------------------------------------------------|-----------------------------|-----|------|----------|-----|-------|-------|-------|-------|-------|------|-------|------|-------|------|-------|-------|------|-------|------|-------|--------|---|--------|-------|
| Tubulin beta chain<br>OS=Homo sapiens<br>GN=TUBB PE=1<br>SV=2 | 7 TBB5_H<br>UMAN,sp<br> P69893 <br>TBB5_CRI<br>GR,sp P6<br>9895 TBB<br>5_MACM<br>U,sp P69<br>897 TBB5<br>_RAT,sp <br>P99024 T<br>BB5_MO<br>USE,sp Q<br>2KID0 TB<br>B5_BOVIN<br>,sp Q5R9<br>43 TBB5_<br>PONAB,sp<br> Q767L7 <br>TBB5_PIG<br>,sp Q7JJU<br>6 TBB5_P<br>ANTR,tr E<br>2QSF4 E2<br>QSF4_CA<br>NFA,tr F7<br>E0H3 F7E | aLTV<br>PELT<br>QQV<br>FDAK | 95% | 60   | 53.49744 | Ref | 0.41  | -0.21 | -0.11 | -0.17 | -0.37 | 0.18 | -0.23 | 9730 | 11900 | 8340 | 10000 | 10600 | 8090 | 12300 | 9210 | 756.8 | 2267.3 | 3 | 0.0224 | 9.874 |
| Tubulin beta chain<br>OS=Homo sapiens<br>GN=TUBB PE=1<br>SV=2 | 7 TBB5_H<br>UMAN,sp<br> P69893 <br>TBB5_CRI<br>GR,sp P6<br>9895 TBB<br>5_MACM<br>U,sp P69<br>897 TBB5<br>_RAT,sp <br>P99024 T<br>BB5_MO<br>USE,sp Q<br>2KID0 TB<br>B5_BOVIN<br>,sp Q5R9<br>43 TBB5_<br>PONAB,sp<br> Q767L7 <br>TBB5_PIG<br>,sp Q7JJU<br>6 TBB5_P<br>ANTR,tr E<br>2QSF4 E2<br>QSF4_CA<br>NFA,tr F7<br>E0H3 F7E | aLTV<br>PELT<br>QQV<br>FDAK | 95% | 62.5 | 53.33862 | Ref | 0.061 | -0.61 | 0.038 | -0.29 | -0.05 | 0.5  | -0.03 | 2790 | 3110  | 2120 | 3730  | 3280  | 3370 | 5140  | 3560 | 756.8 | 2267.3 | 3 | 0.0173 | 7.613 |

|                                                               |                                                                                                                                                                                                                                                                                                                               |                                   |     |      |          |     |      |       |       |       |       |       |       |      |      |      |      |      |      |      |      |       |        |   |        |       |
|---------------------------------------------------------------|-------------------------------------------------------------------------------------------------------------------------------------------------------------------------------------------------------------------------------------------------------------------------------------------------------------------------------|-----------------------------------|-----|------|----------|-----|------|-------|-------|-------|-------|-------|-------|------|------|------|------|------|------|------|------|-------|--------|---|--------|-------|
| Tubulin beta chain<br>OS=Homo sapiens<br>GN=TUBB PE=1<br>SV=2 | 7 TBB5_H<br>UMAN,sp<br> P69893 <br>TBB5_CRI<br>GR,sp P6<br>9895 TBB<br>5_MACM<br>U,sp P69<br>897 TBB5<br>_RAT,sp <br>P99024 T<br>BB5_MO<br>USE,sp Q<br>2KJD0 TB<br>B5_BOVIN<br>,sp Q5R9<br>43 TBB5_<br>PONAB,sp<br> Q767L7 <br>TBB5_PIG<br>,sp Q7JJU<br>6 TBB5_P<br>ANTR,tr E<br>2QSF4 E2<br>QSF4_CA<br>NFA,tr F7<br>E0H3 F7E | aLTV<br>PELT<br>QQV<br>FDak       | 92% | 47.4 | 53.34184 | Ref | 0.21 | -0.1  | -0.04 | -0.19 | -0.28 | 0.029 | -0.15 | 1450 | 1410 | 1230 | 1450 | 1430 | 1180 | 1520 | 1330 | 756.8 | 2267.3 | 3 | 0.0178 | 7.851 |
| Tubulin beta chain<br>OS=Homo sapiens<br>GN=TUBB PE=1<br>SV=2 | 7 TBB5_H<br>UMAN,sp<br> P69893 <br>TBB5_CRI<br>GR,sp P6<br>9895 TBB<br>5_MACM<br>U,sp P69<br>897 TBB5<br>_RAT,sp <br>P99024 T<br>BB5_MO<br>USE,sp Q<br>2KJD0 TB<br>B5_BOVIN<br>,sp Q5R9<br>43 TBB5_<br>PONAB,sp<br> Q767L7 <br>TBB5_PIG<br>,sp Q7JJU<br>6 TBB5_P<br>ANTR,tr E<br>2QSF4 E2<br>QSF4_CA<br>NFA,tr F7<br>E0H3 F7E | eIVH<br>IQAG<br>QcG<br>NQI<br>GAK | 78% | 40.2 | 54.72711 | Ref | 0.23 | -0.07 | -0.28 | -0.1  | -0.03 | -0.09 | -0.18 | 4820 | 4780 | 4210 | 4070 | 5080 | 4650 | 4670 | 4360 | 807.4 | 2419.3 | 3 | 0.0182 | 7.534 |

|                                                               |                                                                                                                                                                                                                                                                                                                               |                                   |     |      |          |     |       |       |       |        |       |       |       |       |      |       |       |       |       |       |       |       |        |   |        |       |
|---------------------------------------------------------------|-------------------------------------------------------------------------------------------------------------------------------------------------------------------------------------------------------------------------------------------------------------------------------------------------------------------------------|-----------------------------------|-----|------|----------|-----|-------|-------|-------|--------|-------|-------|-------|-------|------|-------|-------|-------|-------|-------|-------|-------|--------|---|--------|-------|
| Tubulin beta chain<br>OS=Homo sapiens<br>GN=TUBB PE=1<br>SV=2 | 7 TBB5_H<br>UMAN,sp<br> P69893 <br>TBB5_CRI<br>GR,sp P6<br>9895 TBB<br>5_MACM<br>U,sp P69<br>897 TBB5<br>_RAT,sp <br>P99024 T<br>BB5_MO<br>USE,sp Q<br>2KID0 TB<br>B5_BOVIN<br>,sp Q5R9<br>43 TBB5_<br>PONAB,sp<br> Q767L7 <br>TBB5_PIG<br>,sp Q7JJU<br>6 TBB5_P<br>ANTR,tr E<br>2QSF4 E2<br>QSF4_CA<br>NFA,tr F7<br>E0H3 F7E | eIVH<br>IQAG<br>QcG<br>NQi<br>GAK | 95% | 57.4 | 54.76372 | Ref | -0.16 | 0.039 | 0.048 | -0.029 | 0.003 | -0.09 | -0.27 | 12700 | 9810 | 12200 | 13800 | 14400 | 12900 | 12600 | 11100 | 807.4 | 2419.3 | 3 | 0.0265 | 10.94 |
| Tubulin beta chain<br>OS=Homo sapiens<br>GN=TUBB PE=1<br>SV=2 | 7 TBB5_H<br>UMAN,sp<br> P69893 <br>TBB5_CRI<br>GR,sp P6<br>9895 TBB<br>5_MACM<br>U,sp P69<br>897 TBB5<br>_RAT,sp <br>P99024 T<br>BB5_MO<br>USE,sp Q<br>2KID0 TB<br>B5_BOVIN<br>,sp Q5R9<br>43 TBB5_<br>PONAB,sp<br> Q767L7 <br>TBB5_PIG<br>,sp Q7JJU<br>6 TBB5_P<br>ANTR,tr E<br>2QSF4 E2<br>QSF4_CA<br>NFA,tr F7<br>E0H3 F7E | eIVH<br>IQAG<br>QcG<br>NQi<br>GAK | 78% | 40.3 | 54.7514  | Ref | 0.057 | -0.19 | -0.15 | 0.32   | -0.19 | -0.32 | -0.01 | 3960  | 3680 | 3370  | 3880  | 5940  | 3630  | 3480  | 4270  | 807.4 | 2419.3 | 3 | 0.0234 | 9.654 |

|                                                               |                                                                                                                                                                                                                                                                                                                               |                                   |     |      |          |     |       |       |       |       |       |       |       |       |       |       |       |       |       |       |       |       |        |   |        |       |
|---------------------------------------------------------------|-------------------------------------------------------------------------------------------------------------------------------------------------------------------------------------------------------------------------------------------------------------------------------------------------------------------------------|-----------------------------------|-----|------|----------|-----|-------|-------|-------|-------|-------|-------|-------|-------|-------|-------|-------|-------|-------|-------|-------|-------|--------|---|--------|-------|
| Tubulin beta chain<br>OS=Homo sapiens<br>GN=TUBB PE=1<br>SV=2 | 7 TBB5_H<br>UMAN,sp<br> P69893 <br>TBB5_CRI<br>GR,sp P6<br>9895 TBB<br>5_MACM<br>U,sp P69<br>897 TBB5<br>_RAT,sp <br>P99024 T<br>BB5_MO<br>USE,sp Q<br>2KID0 TB<br>B5_BOVIN<br>,sp Q5R9<br>43 TBB5_<br>PONAB,sp<br> Q767L7 <br>TBB5_PIG<br>,sp Q7JJU<br>6 TBB5_P<br>ANTR,tr E<br>2QSF4 E2<br>QSF4_CA<br>NFA,tr F7<br>E0H3 F7E | eIVH<br>IQAG<br>QcG<br>NQi<br>GAK | 53% | 32.8 | 54.74505 | Ref | -0.11 | 0.064 | 0.011 | -0.17 | 0.031 | -0.03 | -0.21 | 9300  | 7580  | 9310  | 10100 | 9810  | 9830  | 9820  | 8620  | 605.8 | 2419.3 | 4 | 0.0231 | 9.528 |
| Tubulin beta chain<br>OS=Homo sapiens<br>GN=TUBB PE=1<br>SV=2 | 7 TBB5_H<br>UMAN,sp<br> P69893 <br>TBB5_CRI<br>GR,sp P6<br>9895 TBB<br>5_MACM<br>U,sp P69<br>897 TBB5<br>_RAT,sp <br>P99024 T<br>BB5_MO<br>USE,sp Q<br>2KID0 TB<br>B5_BOVIN<br>,sp Q5R9<br>43 TBB5_<br>PONAB,sp<br> Q767L7 <br>TBB5_PIG<br>,sp Q7JJU<br>6 TBB5_P<br>ANTR,tr E<br>2QSF4 E2<br>QSF4_CA<br>NFA,tr F7<br>E0H3 F7E | eIVH<br>IQAG<br>QcG<br>NQi<br>GAK | 71% | 36.3 | 54.72698 | Ref | 0.16  | -0.49 | 0.1   | -0.15 | 0.18  | -0.56 | 0.11  | 19400 | 18400 | 12700 | 21500 | 19900 | 21800 | 13700 | 21500 | 605.8 | 2419.3 | 4 | 0.0172 | 7.115 |

|                                                               |                                                                                                                                                                                                                                                                               |                            |     |      |          |     |        |       |       |        |       |       |       |       |       |       |       |       |       |       |       |       |        |   |        |       |
|---------------------------------------------------------------|-------------------------------------------------------------------------------------------------------------------------------------------------------------------------------------------------------------------------------------------------------------------------------|----------------------------|-----|------|----------|-----|--------|-------|-------|--------|-------|-------|-------|-------|-------|-------|-------|-------|-------|-------|-------|-------|--------|---|--------|-------|
| Tubulin beta chain<br>OS=Homo sapiens<br>GN=TUBB PE=1<br>SV=2 | 7 TBB5_H<br>UMAN,sp<br> P69893 <br>TBB5_CRI<br>GR,sp P6<br>9895 TBB<br>5_MACM<br>U,sp P69<br>897 TBB5<br>_RAT,sp <br>P99024 T<br>BB5_MO<br>USE,sp Q<br>2KID0 TB<br>B5_BOVIN<br>,sp Q5R9<br>43 TBB5_<br>PONAB,sp<br> Q767L7 <br>TBB5_PIG<br>,sp Q7JJU<br>6 TBB5_P<br>ANTR,tr E | eIVH<br>IQAG<br>QcG<br>NQi | 95% | 64.7 | 54.73624 | Ref | -0.078 | 0.015 | 0.13  | -0.091 | 0.1   | -0.28 | -0.19 | 3460  | 3000  | 3470  | 4220  | 3990  | 3980  | 3200  | 3360  | 807.4 | 2419.3 | 3 | 0.0162 | 6.704 |
|                                                               | 7 TBB5_H<br>UMAN,sp<br> P69893 <br>TBB5_CRI<br>GR,sp P6<br>9895 TBB<br>5_MACM<br>U,sp P69<br>897 TBB5<br>_RAT,sp <br>P99024 T<br>BB5_MO<br>USE,sp Q<br>2KID0 TB<br>B5_BOVIN<br>,sp Q5R9<br>43 TBB5_<br>PONAB,sp<br> Q767L7 <br>TBB5_PIG<br>,sp Q7JJU<br>6 TBB5_P<br>ANTR,tr E | eIVH<br>IQAG<br>qcG<br>NQi | 79% | 38.5 | 54.79253 | Ref | 0.01   | -0.1  | 0.078 | 0.094  | -0.05 | -0.15 | -0.02 | 18900 | 20600 | 20600 | 26200 | 29300 | 23200 | 22500 | 24400 | 606.1 | 2420.3 | 4 | 0.0221 | 9.132 |

|                                                               |                                                                                                                                                                                                                                                                                                                               |                                    |     |      |          |     |        |       |       |       |       |       |       |     |     |     |     |     |     |     |     |       |        |   |        |       |
|---------------------------------------------------------------|-------------------------------------------------------------------------------------------------------------------------------------------------------------------------------------------------------------------------------------------------------------------------------------------------------------------------------|------------------------------------|-----|------|----------|-----|--------|-------|-------|-------|-------|-------|-------|-----|-----|-----|-----|-----|-----|-----|-----|-------|--------|---|--------|-------|
| Tubulin beta chain<br>OS=Homo sapiens<br>GN=TUBB PE=1<br>SV=2 | 7 TBB5_H<br>UMAN,sp<br> P69893 <br>TBB5_CRI<br>GR,sp P6<br>9895 TBB<br>5_MACM<br>U,sp P69<br>897 TBB5<br>_RAT,sp <br>P99024 T<br>BB5_MO<br>USE,sp Q<br>2KID0 TB<br>B5_BOVIN<br>,sp Q5R9<br>43 TBB5_<br>PONAB,sp<br> Q767L7 <br>TBB5_PIG<br>,sp Q7JJU<br>6 TBB5_P<br>ANTR,tr E<br>2QSF4 E2<br>QSF4_CA<br>NFA,tr F7<br>E0H3 F7E | gHYT<br>EGA<br>ELVD<br>SVLD<br>VVR | 95% | 62.2 | 54.35093 | Ref | -0.031 | 0.032 | -0.18 | -0.57 | -0.08 | -0.04 | 0.079 | 948 | 682 | 773 | 750 | 631 | 772 | 832 | 895 | 755.1 | 2262.2 | 3 | 0.0121 | 5.365 |
| Tubulin beta chain<br>OS=Homo sapiens<br>GN=TUBB PE=1<br>SV=2 | 7 TBB5_H<br>UMAN,sp<br> P69893 <br>TBB5_CRI<br>GR,sp P6<br>9895 TBB<br>5_MACM<br>U,sp P69<br>897 TBB5<br>_RAT,sp <br>P99024 T<br>BB5_MO<br>USE,sp Q<br>2KID0 TB<br>B5_BOVIN<br>,sp Q5R9<br>43 TBB5_<br>PONAB,sp<br> Q767L7 <br>TBB5_PIG<br>,sp Q7JJU<br>6 TBB5_P<br>ANTR,tr E<br>2QSF4 E2<br>QSF4_CA<br>NFA,tr F7<br>E0H3 F7E | gHYT<br>EGA<br>ELVD<br>SVLD<br>VVR | 94% | 51.9 | 54.35917 | Ref | 0.23   | -0.21 | 0.042 | 0.07  | -0.65 | 0.093 | -0.37 | 430 | 394 | 314 | 420 | 472 | 250 | 437 | 315 | 755.1 | 2262.2 | 3 | 0.0142 | 6.253 |

|                                                               |                                                                                                                                                                                                                                                                                                                               |                                    |     |      |          |     |        |       |       |        |       |       |       |      |      |      |      |      |      |      |      |       |        |   |        |       |
|---------------------------------------------------------------|-------------------------------------------------------------------------------------------------------------------------------------------------------------------------------------------------------------------------------------------------------------------------------------------------------------------------------|------------------------------------|-----|------|----------|-----|--------|-------|-------|--------|-------|-------|-------|------|------|------|------|------|------|------|------|-------|--------|---|--------|-------|
| Tubulin beta chain<br>OS=Homo sapiens<br>GN=TUBB PE=1<br>SV=2 | 7 TBB5_H<br>UMAN,sp<br> P69893 <br>TBB5_CRI<br>GR,sp P6<br>9895 TBB<br>5_MACM<br>U,sp P69<br>897 TBB5<br>_RAT,sp <br>P99024 T<br>BB5_MO<br>USE,sp Q<br>2KID0 TB<br>B5_BOVIN<br>,sp Q5R9<br>43 TBB5_<br>PONAB,sp<br> Q767L7 <br>TBB5_PIG<br>,sp Q7JJU<br>6 TBB5_P<br>ANTR,tr E<br>2QSF4 E2<br>QSF4_CA<br>NFA,tr F7<br>E0H3 F7E | gHyT<br>EGA<br>ELVD<br>SVLD<br>VVR | 82% | 42   | 55.10381 | Ref | 0.11   | -0.22 | -0.05 | -0.029 | -0.14 | -0.05 | -0.03 | 1490 | 1440 | 1240 | 1570 | 1750 | 1420 | 1570 | 1590 | 856.5 | 2566.4 | 3 | 0.0187 | 7.27  |
| Tubulin beta chain<br>OS=Homo sapiens<br>GN=TUBB PE=1<br>SV=2 | 7 TBB5_H<br>UMAN,sp<br> P69893 <br>TBB5_CRI<br>GR,sp P6<br>9895 TBB<br>5_MACM<br>U,sp P69<br>897 TBB5<br>_RAT,sp <br>P99024 T<br>BB5_MO<br>USE,sp Q<br>2KID0 TB<br>B5_BOVIN<br>,sp Q5R9<br>43 TBB5_<br>PONAB,sp<br> Q767L7 <br>TBB5_PIG<br>,sp Q7JJU<br>6 TBB5_P<br>ANTR,tr E<br>2QSF4 E2<br>QSF4_CA<br>NFA,tr F7<br>E0H3 F7E | gHyT<br>EGA<br>ELVD<br>SVLD<br>VVR | 73% | 37.3 | 55.16132 | Ref | -0.053 | -0.25 | 0.17  | 0.072  | -0.14 | -0.13 | 0.1   | 2050 | 2050 | 1940 | 2920 | 3000 | 2250 | 2370 | 2770 | 642.6 | 2566.4 | 4 | 0.0155 | 6.041 |

|                                                               |                                                                                                                                                                                                                                                                                                                               |                                    |     |      |          |     |       |       |       |        |       |       |      |      |      |      |      |      |      |      |      |       |        |   |        |       |
|---------------------------------------------------------------|-------------------------------------------------------------------------------------------------------------------------------------------------------------------------------------------------------------------------------------------------------------------------------------------------------------------------------|------------------------------------|-----|------|----------|-----|-------|-------|-------|--------|-------|-------|------|------|------|------|------|------|------|------|------|-------|--------|---|--------|-------|
| Tubulin beta chain<br>OS=Homo sapiens<br>GN=TUBB PE=1<br>SV=2 | 7 TBB5_H<br>UMAN,sp<br> P69893 <br>TBB5_CRI<br>GR,sp P6<br>9895 TBB<br>5_MACM<br>U,sp P69<br>897 TBB5<br>_RAT,sp <br>P99024 T<br>BB5_MO<br>USE,sp Q<br>2KID0 TB<br>B5_BOVIN<br>,sp Q5R9<br>43 TBB5_<br>PONAB,sp<br> Q767L7 <br>TBB5_PIG<br>,sp Q7JJU<br>6 TBB5_P<br>ANTR,tr E<br>2QSF4 E2<br>QSF4_CA<br>NFA,tr F7<br>E0H3 F7E | gHyT<br>EGA<br>ELVD<br>SVLD<br>VVR | 89% | 44.6 | 55.07319 | Ref | 0.045 | -0.1  | -0.01 | -0.029 | -0.26 | -0.15 | 0.27 | 3140 | 3380 | 3330 | 3970 | 4310 | 3220 | 3630 | 4780 | 642.6 | 2566.4 | 4 | 0.0123 | 4.81  |
| Tubulin beta chain<br>OS=Homo sapiens<br>GN=TUBB PE=1<br>SV=2 | 7 TBB5_H<br>UMAN,sp<br> P69893 <br>TBB5_CRI<br>GR,sp P6<br>9895 TBB<br>5_MACM<br>U,sp P69<br>897 TBB5<br>_RAT,sp <br>P99024 T<br>BB5_MO<br>USE,sp Q<br>2KID0 TB<br>B5_BOVIN<br>,sp Q5R9<br>43 TBB5_<br>PONAB,sp<br> Q767L7 <br>TBB5_PIG<br>,sp Q7JJU<br>6 TBB5_P<br>ANTR,tr E<br>2QSF4 E2<br>QSF4_CA<br>NFA,tr F7<br>E0H3 F7E | gHyT<br>EGA<br>ELVD<br>SVLD<br>VVR | 91% | 47.8 | 55.06995 | Ref | 0.19  | 0.042 | 0.07  | -0.052 | -0.16 | -0.04 | -0.4 | 1720 | 1860 | 1830 | 2090 | 2120 | 1720 | 1940 | 1500 | 856.5 | 2566.4 | 3 | 0.0115 | 4.489 |



|                                                               |                                                                                                                                                                                                                                                                                                                               |                          |     |      |          |     |      |       |       |       |       |       |       |      |      |      |      |      |      |      |      |       |        |   |        |       |
|---------------------------------------------------------------|-------------------------------------------------------------------------------------------------------------------------------------------------------------------------------------------------------------------------------------------------------------------------------------------------------------------------------|--------------------------|-----|------|----------|-----|------|-------|-------|-------|-------|-------|-------|------|------|------|------|------|------|------|------|-------|--------|---|--------|-------|
| Tubulin beta chain<br>OS=Homo sapiens<br>GN=TUBB PE=1<br>SV=2 | 7 TBB5_H<br>UMAN,sp<br> P69893 <br>TBB5_CRI<br>GR,sp P6<br>9895 TBB<br>5_MACM<br>U,sp P69<br>897 TBB5<br>_RAT,sp <br>P99024 T<br>BB5_MO<br>USE,sp Q<br>2KID0 TB<br>B5_BOVIN<br>,sp Q5R9<br>43 TBB5_<br>PONAB,sp<br> Q767L7 <br>TBB5_PIG<br>,sp Q7JJU<br>6 TBB5_P<br>ANTR,tr E<br>2QSF4 E2<br>QSF4_CA<br>NFA,tr F7<br>E0H3 F7E | iMN<br>TFSV<br>VPSP<br>k | 89% | 42.1 | 52.88612 | Ref | 0.4  | -0.3  | 0.06  | -0.17 | -0.21 | -0.11 | -0.14 | 4760 | 5650 | 3770 | 5450 | 5120 | 4350 | 4870 | 4720 | 964.6 | 1927.1 | 2 | 0.0125 | 6.506 |
| Tubulin beta chain<br>OS=Homo sapiens<br>GN=TUBB PE=1<br>SV=2 | 7 TBB5_H<br>UMAN,sp<br> P69893 <br>TBB5_CRI<br>GR,sp P6<br>9895 TBB<br>5_MACM<br>U,sp P69<br>897 TBB5<br>_RAT,sp <br>P99024 T<br>BB5_MO<br>USE,sp Q<br>2KID0 TB<br>B5_BOVIN<br>,sp Q5R9<br>43 TBB5_<br>PONAB,sp<br> Q767L7 <br>TBB5_PIG<br>,sp Q7JJU<br>6 TBB5_P<br>ANTR,tr E<br>2QSF4 E2<br>QSF4_CA<br>NFA,tr F7<br>E0H3 F7E | iMN<br>TFSV<br>VPSP<br>k | 95% | 49.6 | 52.95538 | Ref | 0.21 | -0.36 | 0.051 | -0.14 | -0.26 | -0.01 | -0.17 | 3780 | 3400 | 2490 | 3710 | 3590 | 2870 | 3580 | 3180 | 964.6 | 1927.1 | 2 | 0.0169 | 8.788 |

|                                                               |                                                                                                                                                                                                                                                                                                                               |                    |     |      |          |     |       |       |       |       |       |       |       |       |        |       |        |        |       |       |        |       |        |   |        |       |
|---------------------------------------------------------------|-------------------------------------------------------------------------------------------------------------------------------------------------------------------------------------------------------------------------------------------------------------------------------------------------------------------------------|--------------------|-----|------|----------|-----|-------|-------|-------|-------|-------|-------|-------|-------|--------|-------|--------|--------|-------|-------|--------|-------|--------|---|--------|-------|
| Tubulin beta chain<br>OS=Homo sapiens<br>GN=TUBB PE=1<br>SV=2 | 7 TBB5_H<br>UMAN,sp<br> P69893 <br>TBB5_CRI<br>GR,sp P6<br>9895 TBB<br>5_MACM<br>U,sp P69<br>897 TBB5<br>_RAT,sp <br>P99024 T<br>BB5_MO<br>USE,sp Q<br>2KID0 TB<br>B5_BOVIN<br>,sp Q5R9<br>43 TBB5_<br>PONAB,sp<br> Q767L7 <br>TBB5_PIG<br>,sp Q7JJU<br>6 TBB5_P<br>ANTR,tr E<br>2QSF4 E2<br>QSF4_CA<br>NFA,tr F7<br>E0H3 F7E | iREE<br>YPD<br>R   | 65% | 33.4 | 51.27516 | Ref | 0.032 | 0.34  | 0.35  | -0.17 | -0.37 | -0.37 | -0.27 | 1E+05 | 125000 | 2E+05 | 191000 | 146000 | 1E+05 | 1E+05 | 123000 | 461.2 | 1380.7 | 3 | 0.0114 | 8.271 |
| Tubulin beta chain<br>OS=Homo sapiens<br>GN=TUBB PE=1<br>SV=2 | 7 TBB5_H<br>UMAN,sp<br> P69893 <br>TBB5_CRI<br>GR,sp P6<br>9895 TBB<br>5_MACM<br>U,sp P69<br>897 TBB5<br>_RAT,sp <br>P99024 T<br>BB5_MO<br>USE,sp Q<br>2KID0 TB<br>B5_BOVIN<br>,sp Q5R9<br>43 TBB5_<br>PONAB,sp<br> Q767L7 <br>TBB5_PIG<br>,sp Q7JJU<br>6 TBB5_P<br>ANTR,tr E<br>2QSF4 E2<br>QSF4_CA<br>NFA,tr F7<br>E0H3 F7E | iSEQ<br>FTA<br>MFR | 86% | 39.5 | 51.69157 | Ref | 0.087 | -0.21 | 0.064 | -0.26 | -0.09 | -0.15 | -0.13 | 9170  | 7320   | 6450  | 8770   | 7740   | 7570  | 7590  | 7640   | 767.4 | 1532.8 | 2 | 0.0052 | 3.41  |

|                                                               |                                                                                                                                                                                                                                                                                                                               |                          |     |      |          |     |        |       |       |      |       |       |       |      |      |      |      |      |      |      |      |       |      |   |        |       |
|---------------------------------------------------------------|-------------------------------------------------------------------------------------------------------------------------------------------------------------------------------------------------------------------------------------------------------------------------------------------------------------------------------|--------------------------|-----|------|----------|-----|--------|-------|-------|------|-------|-------|-------|------|------|------|------|------|------|------|------|-------|------|---|--------|-------|
| Tubulin beta chain<br>OS=Homo sapiens<br>GN=TUBB PE=1<br>SV=2 | 7 TBB5_H<br>UMAN,sp<br> P69893 <br>TBB5_CRI<br>GR,sp P6<br>9895 TBB<br>5_MACM<br>U,sp P69<br>897 TBB5<br>_RAT,sp <br>P99024 T<br>BB5_MO<br>USE,sp Q<br>2KID0 TB<br>B5_BOVIN<br>,sp Q5R9<br>43 TBB5_<br>PONAB,sp<br> Q767L7 <br>TBB5_PIG<br>,sp Q7JJU<br>6 TBB5_P<br>ANTR,tr E<br>2QSF4 E2<br>QSF4_CA<br>NFA,tr F7<br>E0H3 F7E | iSVY<br>YNE<br>ATG<br>Gk | 95% | 51.9 | 53.63629 | Ref | 0.065  | -0.15 | 0.036 | -0.1 | 0.093 | -0.24 | -0.18 | 7120 | 6360 | 5960 | 7590 | 7600 | 7600 | 6290 | 6530 | 955.5 | 1909 | 2 | 0.0155 | 8.101 |
| Tubulin beta chain<br>OS=Homo sapiens<br>GN=TUBB PE=1<br>SV=2 | 7 TBB5_H<br>UMAN,sp<br> P69893 <br>TBB5_CRI<br>GR,sp P6<br>9895 TBB<br>5_MACM<br>U,sp P69<br>897 TBB5<br>_RAT,sp <br>P99024 T<br>BB5_MO<br>USE,sp Q<br>2KID0 TB<br>B5_BOVIN<br>,sp Q5R9<br>43 TBB5_<br>PONAB,sp<br> Q767L7 <br>TBB5_PIG<br>,sp Q7JJU<br>6 TBB5_P<br>ANTR,tr E<br>2QSF4 E2<br>QSF4_CA<br>NFA,tr F7<br>E0H3 F7E | iSVY<br>YNE<br>ATG<br>Gk | 95% | 52.3 | 53.58586 | Ref | -0.006 | -0.15 | -0.04 | 0.16 | -0.1  | -0.32 | -0.15 | 7510 | 5910 | 5800 | 7030 | 8870 | 6480 | 5800 | 6500 | 955.5 | 1909 | 2 | 0.0126 | 6.572 |

|                                                               |                                                                                                                                                                                                                                                                                                                               |                          |     |      |         |     |       |       |       |        |       |       |       |       |       |       |       |       |       |       |       |       |      |   |        |       |
|---------------------------------------------------------------|-------------------------------------------------------------------------------------------------------------------------------------------------------------------------------------------------------------------------------------------------------------------------------------------------------------------------------|--------------------------|-----|------|---------|-----|-------|-------|-------|--------|-------|-------|-------|-------|-------|-------|-------|-------|-------|-------|-------|-------|------|---|--------|-------|
| Tubulin beta chain<br>OS=Homo sapiens<br>GN=TUBB PE=1<br>SV=2 | 7 TBB5_H<br>UMAN,sp<br> P69893 <br>TBB5_CRI<br>GR,sp P6<br>9895 TBB<br>5_MACM<br>U,sp P69<br>897 TBB5<br>_RAT,sp <br>P99024 T<br>BB5_MO<br>USE,sp Q<br>2KID0 TB<br>B5_BOVIN<br>,sp Q5R9<br>43 TBB5_<br>PONAB,sp<br> Q767L7 <br>TBB5_PIG<br>,sp Q7JJU<br>6 TBB5_P<br>ANTR,tr E<br>2QSF4 E2<br>QSF4_CA<br>NFA,tr F7<br>E0H3 F7E | ISVY<br>YNE<br>ATG<br>Gk | 91% | 46.3 | 53.578  | Ref | 0.1   | -0.07 | -0.03 | -0.053 | -0.17 | -0.13 | -0.13 | 24600 | 22200 | 21300 | 24600 | 26700 | 21500 | 23000 | 22900 | 637.4 | 1909 | 3 | 0.0104 | 5.455 |
| Tubulin beta chain<br>OS=Homo sapiens<br>GN=TUBB PE=1<br>SV=2 | 7 TBB5_H<br>UMAN,sp<br> P69893 <br>TBB5_CRI<br>GR,sp P6<br>9895 TBB<br>5_MACM<br>U,sp P69<br>897 TBB5<br>_RAT,sp <br>P99024 T<br>BB5_MO<br>USE,sp Q<br>2KID0 TB<br>B5_BOVIN<br>,sp Q5R9<br>43 TBB5_<br>PONAB,sp<br> Q767L7 <br>TBB5_PIG<br>,sp Q7JJU<br>6 TBB5_P<br>ANTR,tr E<br>2QSF4 E2<br>QSF4_CA<br>NFA,tr F7<br>E0H3 F7E | ISVY<br>YNE<br>ATG<br>Gk | 95% | 59.6 | 53.5379 | Ref | -0.13 | -0.12 | 0.014 | 0.081  | -0.09 | -0.21 | -0.07 | 5080  | 3770  | 4140  | 5090  | 5880  | 4550  | 4370  | 4780  | 955.5 | 1909 | 2 | 0.0157 | 8.227 |

|                                                               |                                                                                                                                                                                                                                                                                                                               |                          |     |      |          |     |        |       |       |        |       |       |       |       |       |       |       |       |       |       |       |       |      |   |        |       |
|---------------------------------------------------------------|-------------------------------------------------------------------------------------------------------------------------------------------------------------------------------------------------------------------------------------------------------------------------------------------------------------------------------|--------------------------|-----|------|----------|-----|--------|-------|-------|--------|-------|-------|-------|-------|-------|-------|-------|-------|-------|-------|-------|-------|------|---|--------|-------|
| Tubulin beta chain<br>OS=Homo sapiens<br>GN=TUBB PE=1<br>SV=2 | 7 TBB5_H<br>UMAN,sp<br> P69893 <br>TBB5_CRI<br>GR,sp P6<br>9895 TBB<br>5_MACM<br>U,sp P69<br>897 TBB5<br>_RAT,sp <br>P99024 T<br>BB5_MO<br>USE,sp Q<br>2KID0 TB<br>B5_BOVIN<br>,sp Q5R9<br>43 TBB5_<br>PONAB,sp<br> Q767L7 <br>TBB5_PIG<br>,sp Q7JJU<br>6 TBB5_P<br>ANTR,tr E<br>2QSF4 E2<br>QSF4_CA<br>NFA,tr F7<br>E0H3 F7E | iSVY<br>YNE<br>ATG<br>Gk | 80% | 40   | 53.5894  | Ref | -0.055 | -0.06 | -0.11 | -0.07  | -0.25 | 0.014 | 0.092 | 4200  | 3520  | 3820  | 4130  | 4680  | 3620  | 4530  | 4740  | 637.3 | 1909 | 3 | 0.0205 | 10.73 |
| Tubulin beta chain<br>OS=Homo sapiens<br>GN=TUBB PE=1<br>SV=2 | 7 TBB5_H<br>UMAN,sp<br> P69893 <br>TBB5_CRI<br>GR,sp P6<br>9895 TBB<br>5_MACM<br>U,sp P69<br>897 TBB5<br>_RAT,sp <br>P99024 T<br>BB5_MO<br>USE,sp Q<br>2KID0 TB<br>B5_BOVIN<br>,sp Q5R9<br>43 TBB5_<br>PONAB,sp<br> Q767L7 <br>TBB5_PIG<br>,sp Q7JJU<br>6 TBB5_P<br>ANTR,tr E<br>2QSF4 E2<br>QSF4_CA<br>NFA,tr F7<br>E0H3 F7E | iSVY<br>YnEA<br>TGG<br>k | 86% | 42.8 | 53.45797 | Ref | 0.039  | -0.07 | -0.26 | -0.075 | 0.02  | -0.18 | 0.033 | 15000 | 13000 | 13100 | 12900 | 16100 | 15000 | 13600 | 15700 | 637.7 | 1910 | 3 | 0.0212 | 11.11 |

|                                                               |                                                                                                                                                                                                                                                                                                                               |                          |     |      |          |     |      |      |       |       |       |       |       |      |      |      |      |       |      |      |      |       |        |   |        |       |
|---------------------------------------------------------------|-------------------------------------------------------------------------------------------------------------------------------------------------------------------------------------------------------------------------------------------------------------------------------------------------------------------------------|--------------------------|-----|------|----------|-----|------|------|-------|-------|-------|-------|-------|------|------|------|------|-------|------|------|------|-------|--------|---|--------|-------|
| Tubulin beta chain<br>OS=Homo sapiens<br>GN=TUBB PE=1<br>SV=2 | 7 TBB5_H<br>UMAN,sp<br> P69893 <br>TBB5_CRI<br>GR,sp P6<br>9895 TBB<br>5_MACM<br>U,sp P69<br>897 TBB5<br>_RAT,sp <br>P99024 T<br>BB5_MO<br>USE,sp Q<br>2KID0 TB<br>B5_BOVIN<br>,sp Q5R9<br>43 TBB5_<br>PONAB,sp<br> Q767L7 <br>TBB5_PIG<br>,sp Q7JJU<br>6 TBB5_P<br>ANTR,tr E<br>2QSF4 E2<br>QSF4_CA<br>NFA,tr F7<br>E0H3 F7E | ISVY<br>YnEA<br>TGG<br>k | 95% | 58   | 53.55244 | Ref | -0.2 | 0.13 | -0.26 | 0.065 | -0.19 | 0.002 | -0.12 | 9950 | 7010 | 9620 | 8190 | 11300 | 8290 | 9900 | 9050 | 956   | 1910   | 2 | 0.0144 | 7.526 |
| Tubulin beta chain<br>OS=Homo sapiens<br>GN=TUBB PE=1<br>SV=2 | 7 TBB5_H<br>UMAN,sp<br> P69893 <br>TBB5_CRI<br>GR,sp P6<br>9895 TBB<br>5_MACM<br>U,sp P69<br>897 TBB5<br>_RAT,sp <br>P99024 T<br>BB5_MO<br>USE,sp Q<br>2KID0 TB<br>B5_BOVIN<br>,sp Q5R9<br>43 TBB5_<br>PONAB,sp<br> Q767L7 <br>TBB5_PIG<br>,sp Q7JJU<br>6 TBB5_P<br>ANTR,tr E<br>2QSF4 E2<br>QSF4_CA<br>NFA,tr F7<br>E0H3 F7E | kLAV<br>NMV<br>PFPR      | 55% | 29.7 | 51.34665 | Ref | 0.19 | 0.11 | 0.03  | -0.15 | -0.2  | -0.1  | -0.24 | 3710 | 4000 | 4100 | 4350 | 4230  | 3560 | 3980 | 3600 | 470.8 | 1879.1 | 4 | 0.0234 | 12.46 |

|                                                               |                                                                                                                                                                                                                                                                                                                               |                    |     |      |          |     |      |       |       |       |       |       |       |       |       |       |       |       |       |       |       |       |        |   |        |       |
|---------------------------------------------------------------|-------------------------------------------------------------------------------------------------------------------------------------------------------------------------------------------------------------------------------------------------------------------------------------------------------------------------------|--------------------|-----|------|----------|-----|------|-------|-------|-------|-------|-------|-------|-------|-------|-------|-------|-------|-------|-------|-------|-------|--------|---|--------|-------|
| Tubulin beta chain<br>OS=Homo sapiens<br>GN=TUBB PE=1<br>SV=2 | 7 TBB5_H<br>UMAN,sp<br> P69893 <br>TBB5_CRI<br>GR,sp P6<br>9895 TBB<br>5_MACM<br>U,sp P69<br>897 TBB5<br>_RAT,sp <br>P99024 T<br>BB5_MO<br>USE,sp Q<br>2KID0 TB<br>B5_BOVIN<br>,sp Q5R9<br>43 TBB5_<br>PONAB,sp<br> Q767L7 <br>TBB5_PIG<br>,sp Q7JJU<br>6 TBB5_P<br>ANTR,tr E<br>2QSF4 E2<br>QSF4_CA<br>NFA,tr F7<br>E0H3 F7E | IAVN<br>MVP<br>FPR | 84% | 38.5 | 51.89869 | Ref | 0.32 | -0.22 | 0.13  | -0.25 | -0.17 | -0.03 | -0.29 | 32500 | 35100 | 26300 | 37600 | 31800 | 29300 | 33800 | 27900 | 724.4 | 1446.8 | 2 | 0.0122 | 8.414 |
| Tubulin beta chain<br>OS=Homo sapiens<br>GN=TUBB PE=1<br>SV=2 | 7 TBB5_H<br>UMAN,sp<br> P69893 <br>TBB5_CRI<br>GR,sp P6<br>9895 TBB<br>5_MACM<br>U,sp P69<br>897 TBB5<br>_RAT,sp <br>P99024 T<br>BB5_MO<br>USE,sp Q<br>2KID0 TB<br>B5_BOVIN<br>,sp Q5R9<br>43 TBB5_<br>PONAB,sp<br> Q767L7 <br>TBB5_PIG<br>,sp Q7JJU<br>6 TBB5_P<br>ANTR,tr E<br>2QSF4 E2<br>QSF4_CA<br>NFA,tr F7<br>E0H3 F7E | IAVn<br>MVP<br>FPR | 81% | 37.9 | 52.28172 | Ref | 0.29 | -0.11 | -0.06 | -0.24 | -0.12 | -0.22 | -0.07 | 13600 | 14000 | 11600 | 13400 | 13100 | 12400 | 12100 | 13300 | 724.9 | 1447.8 | 2 | 0.0104 | 7.144 |

|                                                               |                                                                                                                                                                                                                                                                                                                               |                            |     |      |          |     |       |       |       |       |                                            |       |      |      |      |      |      |      |                                                |      |      |       |      |   |        |       |
|---------------------------------------------------------------|-------------------------------------------------------------------------------------------------------------------------------------------------------------------------------------------------------------------------------------------------------------------------------------------------------------------------------|----------------------------|-----|------|----------|-----|-------|-------|-------|-------|--------------------------------------------|-------|------|------|------|------|------|------|------------------------------------------------|------|------|-------|------|---|--------|-------|
| Tubulin beta chain<br>OS=Homo sapiens<br>GN=TUBB PE=1<br>SV=2 | 7 TBB5_H<br>UMAN,sp<br> P69893 <br>TBB5_CRI<br>GR,sp P6<br>9895 TBB<br>5_MACM<br>U,sp P69<br>897 TBB5<br>_RAT,sp <br>P99024 T<br>BB5_MO<br>USE,sp Q<br>2KID0 TB<br>B5_BOVIN<br>,sp Q5R9<br>43 TBB5_<br>PONAB,sp<br> Q767L7 <br>TBB5_PIG<br>,sp Q7JJU<br>6 TBB5_P<br>ANTR,tr E<br>2QSF4 E2<br>QSF4_CA<br>NFA,tr F7<br>E0H3 F7E | IHFF<br>MPG<br>FAPL<br>TSR | 93% | 48.7 | 53.62568 | Ref | 0.15  | -0.34 | -0.27 | -0.24 | -0.6                                       | -0.19 | 0.8  | 1150 | 1290 | 995  | 1170 | 1310 | 896                                            | 1250 | 2450 | 642.3 | 1924 | 3 | 0.0101 | 5.227 |
| Tubulin beta chain<br>OS=Homo sapiens<br>GN=TUBB PE=1<br>SV=2 | 7 TBB5_H<br>UMAN,sp<br> P69893 <br>TBB5_CRI<br>GR,sp P6<br>9895 TBB<br>5_MACM<br>U,sp P69<br>897 TBB5<br>_RAT,sp <br>P99024 T<br>BB5_MO<br>USE,sp Q<br>2KID0 TB<br>B5_BOVIN<br>,sp Q5R9<br>43 TBB5_<br>PONAB,sp<br> Q767L7 <br>TBB5_PIG<br>,sp Q7JJU<br>6 TBB5_P<br>ANTR,tr E<br>2QSF4 E2<br>QSF4_CA<br>NFA,tr F7<br>E0H3 F7E | IHFF<br>MPG<br>FAPL<br>TSR | 94% | 50.3 | 53.75047 | Ref | 0.044 | -0.08 | -0.09 | -0.23 | Value<br>Missin<br>g (-<br>0.5304<br>6674) | -0.22 | 0.51 | 1450 | 1340 | 1330 | 1490 | 1490 | Value<br>Missi<br>ng (-<br>0.530<br>46674<br>) | 1370 | 2250 | 642.4 | 1924 | 3 | 0.0016 | 0.847 |



|                                                               |                                                                                                                                                                                                                                                                                                                               |                            |     |      |          |     |       |       |       |       |       |       |       |      |      |      |      |      |      |      |      |       |      |   |        |       |
|---------------------------------------------------------------|-------------------------------------------------------------------------------------------------------------------------------------------------------------------------------------------------------------------------------------------------------------------------------------------------------------------------------|----------------------------|-----|------|----------|-----|-------|-------|-------|-------|-------|-------|-------|------|------|------|------|------|------|------|------|-------|------|---|--------|-------|
| Tubulin beta chain<br>OS=Homo sapiens<br>GN=TUBB PE=1<br>SV=2 | 7 TBB5_H<br>UMAN,sp<br> P69893 <br>TBB5_CRI<br>GR,sp P6<br>9895 TBB<br>5_MACM<br>U,sp P69<br>897 TBB5<br>_RAT,sp <br>P99024 T<br>BB5_MO<br>USE,sp Q<br>2KID0 TB<br>B5_BOVIN<br>,sp Q5R9<br>43 TBB5_<br>PONAB,sp<br> Q767L7 <br>TBB5_PIG<br>,sp Q7JJU<br>6 TBB5_P<br>ANTR,tr E<br>2QSF4 E2<br>QSF4_CA<br>NFA,tr F7<br>E0H3 F7E | IHFF<br>MPG<br>FAPL<br>TSR | 93% | 49.1 | 53.68575 | Ref | -0.14 | -0.02 | 0.35  | -0.24 | -0.46 | -0.19 | 0.069 | 477  | 361  | 424  | 617  | 450  | 339  | 425  | 505  | 642.3 | 1924 | 3 | 0.0075 | 3.886 |
| Tubulin beta chain<br>OS=Homo sapiens<br>GN=TUBB PE=1<br>SV=2 | 7 TBB5_H<br>UMAN,sp<br> P69893 <br>TBB5_CRI<br>GR,sp P6<br>9895 TBB<br>5_MACM<br>U,sp P69<br>897 TBB5<br>_RAT,sp <br>P99024 T<br>BB5_MO<br>USE,sp Q<br>2KID0 TB<br>B5_BOVIN<br>,sp Q5R9<br>43 TBB5_<br>PONAB,sp<br> Q767L7 <br>TBB5_PIG<br>,sp Q7JJU<br>6 TBB5_P<br>ANTR,tr E<br>2QSF4 E2<br>QSF4_CA<br>NFA,tr F7<br>E0H3 F7E | IHFF<br>mPG<br>FAPL<br>TSR | 95% | 59.5 | 53.67796 | Ref | 0.096 | -0.18 | -0.17 | -0.16 | -0.03 | -0.11 | 0.14  | 1630 | 1550 | 1390 | 1560 | 1740 | 1670 | 1640 | 1940 | 647.7 | 1940 | 3 | 0.0085 | 4.371 |

|                                                               |                                                                                                                                                                                                                                                                                                                               |                            |     |      |          |     |      |       |       |       |       |       |       |     |     |     |     |      |     |     |      |       |      |   |        |       |
|---------------------------------------------------------------|-------------------------------------------------------------------------------------------------------------------------------------------------------------------------------------------------------------------------------------------------------------------------------------------------------------------------------|----------------------------|-----|------|----------|-----|------|-------|-------|-------|-------|-------|-------|-----|-----|-----|-----|------|-----|-----|------|-------|------|---|--------|-------|
| Tubulin beta chain<br>OS=Homo sapiens<br>GN=TUBB PE=1<br>SV=2 | 7 TBB5_H<br>UMAN,sp<br> P69893 <br>TBB5_CRI<br>GR,sp P6<br>9895 TBB<br>5_MACM<br>U,sp P69<br>897 TBB5<br>_RAT,sp <br>P99024 T<br>BB5_MO<br>USE,sp Q<br>2KJD0 TB<br>B5_BOVIN<br>,sp Q5R9<br>43 TBB5_<br>PONAB,sp<br> Q767L7 <br>TBB5_PIG<br>,sp Q7JJU<br>6 TBB5_P<br>ANTR,tr E<br>2QSF4 E2<br>QSF4_CA<br>NFA,tr F7<br>E0H3 F7E | IHFF<br>mPG<br>FAPL<br>TSR | 92% | 48.4 | 53.70511 | Ref | 0.15 | -0.21 | 0.19  | -0.28 | -0.22 | 0.14  | -0.35 | 561 | 519 | 441 | 651 | 518  | 472 | 630 | 447  | 647.7 | 1940 | 3 | 0.0081 | 4.17  |
| Tubulin beta chain<br>OS=Homo sapiens<br>GN=TUBB PE=1<br>SV=2 | 7 TBB5_H<br>UMAN,sp<br> P69893 <br>TBB5_CRI<br>GR,sp P6<br>9895 TBB<br>5_MACM<br>U,sp P69<br>897 TBB5<br>_RAT,sp <br>P99024 T<br>BB5_MO<br>USE,sp Q<br>2KJD0 TB<br>B5_BOVIN<br>,sp Q5R9<br>43 TBB5_<br>PONAB,sp<br> Q767L7 <br>TBB5_PIG<br>,sp Q7JJU<br>6 TBB5_P<br>ANTR,tr E<br>2QSF4 E2<br>QSF4_CA<br>NFA,tr F7<br>E0H3 F7E | IHFF<br>mPG<br>FAPL<br>TSR | 95% | 59.9 | 53.69752 | Ref | 0.16 | -0.08 | -0.03 | -0.12 | -0.49 | -0.12 | 0.32  | 837 | 929 | 855 | 991 | 1030 | 695 | 939 | 1260 | 647.7 | 1940 | 3 | 0.0072 | 3.706 |

|                                                               |                                                                                                                                                                                                                                                                                                                               |                                |     |      |          |     |       |       |       |       |       |       |       |       |       |       |       |       |       |       |       |       |        |   |        |       |
|---------------------------------------------------------------|-------------------------------------------------------------------------------------------------------------------------------------------------------------------------------------------------------------------------------------------------------------------------------------------------------------------------------|--------------------------------|-----|------|----------|-----|-------|-------|-------|-------|-------|-------|-------|-------|-------|-------|-------|-------|-------|-------|-------|-------|--------|---|--------|-------|
| Tubulin beta chain<br>OS=Homo sapiens<br>GN=TUBB PE=1<br>SV=2 | 7 TBB5_H<br>UMAN,sp<br> P69893 <br>TBB5_CRI<br>GR,sp P6<br>9895 TBB<br>5_MACM<br>U,sp P69<br>897 TBB5<br>_RAT,sp <br>P99024 T<br>BB5_MO<br>USE,sp Q<br>2KID0 TB<br>B5_BOVIN<br>,sp Q5R9<br>43 TBB5_<br>PONAB,sp<br> Q767L7 <br>TBB5_PIG<br>,sp Q7JJU<br>6 TBB5_P<br>ANTR,tr E<br>2QSF4 E2<br>QSF4_CA<br>NFA,tr F7<br>E0H3 F7E | nM<br>MAA<br>cDPR              | 85% | 31.3 | 44.21209 | Ref | 0.18  | -0.05 | 0.016 | -0.11 | -0.24 | -0.13 | -0.14 | 67600 | 65600 | 60700 | 71300 | 71800 | 57400 | 64900 | 63700 | 679.8 | 1357.6 | 2 | 0.0049 | 3.578 |
| Tubulin beta chain<br>OS=Homo sapiens<br>GN=TUBB PE=1<br>SV=2 | 7 TBB5_H<br>UMAN,sp<br> P69893 <br>TBB5_CRI<br>GR,sp P6<br>9895 TBB<br>5_MACM<br>U,sp P69<br>897 TBB5<br>_RAT,sp <br>P99024 T<br>BB5_MO<br>USE,sp Q<br>2KID0 TB<br>B5_BOVIN<br>,sp Q5R9<br>43 TBB5_<br>PONAB,sp<br> Q767L7 <br>TBB5_PIG<br>,sp Q7JJU<br>6 TBB5_P<br>ANTR,tr E<br>2QSF4 E2<br>QSF4_CA<br>NFA,tr F7<br>E0H3 F7E | nSSY<br>FVE<br>WIP<br>NNV<br>k | 62% | 36.2 | 54.62914 | Ref | 0.034 | -0.34 | 0.14  | 0.043 | -0.44 | 0.49  | -0.19 | 3960  | 4700  | 3950  | 6160  | 6350  | 3980  | 7900  | 4900  | 769.1 | 2304.2 | 3 | 0.0176 | 7.619 |

|                                                               |                                                                                                                                                                                                                                                                                                                               |                   |     |      |          |     |      |       |       |       |       |       |       |      |      |      |      |      |      |      |      |       |        |   |        |       |
|---------------------------------------------------------------|-------------------------------------------------------------------------------------------------------------------------------------------------------------------------------------------------------------------------------------------------------------------------------------------------------------------------------|-------------------|-----|------|----------|-----|------|-------|-------|-------|-------|-------|-------|------|------|------|------|------|------|------|------|-------|--------|---|--------|-------|
| Tubulin beta chain<br>OS=Homo sapiens<br>GN=TUBB PE=1<br>SV=2 | 7 TBB5_H<br>UMAN,sp<br> P69893 <br>TBB5_CRI<br>GR,sp P6<br>9895 TBB<br>5_MACM<br>U,sp P69<br>897 TBB5<br>_RAT,sp <br>P99024 T<br>BB5_MO<br>USE,sp Q<br>2KID0 TB<br>B5_BOVIN<br>,sp Q5R9<br>43 TBB5_<br>PONAB,sp<br> Q767L7 <br>TBB5_PIG<br>,sp Q7JJU<br>6 TBB5_P<br>ANTR,tr E<br>2QSF4 E2<br>QSF4_CA<br>NFA,tr F7<br>E0H3 F7E | yLTV<br>AAV<br>FR | 77% | 35.3 | 50.78294 | Ref | 0.21 | -0.32 | 0.14  | -0.22 | -0.39 | -0.04 | -0.05 | 6410 | 5890 | 4410 | 6840 | 5880 | 4540 | 6060 | 5950 | 672.4 | 1342.8 | 2 | 0.0038 | 2.804 |
| Tubulin beta chain<br>OS=Homo sapiens<br>GN=TUBB PE=1<br>SV=2 | 7 TBB5_H<br>UMAN,sp<br> P69893 <br>TBB5_CRI<br>GR,sp P6<br>9895 TBB<br>5_MACM<br>U,sp P69<br>897 TBB5<br>_RAT,sp <br>P99024 T<br>BB5_MO<br>USE,sp Q<br>2KID0 TB<br>B5_BOVIN<br>,sp Q5R9<br>43 TBB5_<br>PONAB,sp<br> Q767L7 <br>TBB5_PIG<br>,sp Q7JJU<br>6 TBB5_P<br>ANTR,tr E<br>2QSF4 E2<br>QSF4_CA<br>NFA,tr F7<br>E0H3 F7E | yLTV<br>AAV<br>FR | 79% | 36   | 50.90808 | Ref | 0.36 | -0.46 | 0.027 | -0.23 | -0.16 | 9E-04 | -0.27 | 1280 | 1270 | 785  | 1240 | 1140 | 1050 | 1220 | 1000 | 672.4 | 1342.8 | 2 | 0.007  | 5.245 |

|                                                               |                                                                                                                                           |             |     |      |          |     |       |       |       |        |       |       |      |       |        |       |        |        |       |       |        |       |        |   |        |       |
|---------------------------------------------------------------|-------------------------------------------------------------------------------------------------------------------------------------------|-------------|-----|------|----------|-----|-------|-------|-------|--------|-------|-------|------|-------|--------|-------|--------|--------|-------|-------|--------|-------|--------|---|--------|-------|
| Tropomyosin alpha-4 chain OS=Equus caballus GN=TPM4 PE=1 SV=2 | sp P02561 TPM4_HORSE,sp P67936 TPM4_HUMAN,sp P67937 TPM4_PIG,trans D0G7F7 D0G7F7_PIG,trans E2R662 E2R662_CANF A,trans F7GGJ7 F7GGJ7_MONDO | aEGDVAALNR  | 94% | 45.2 | 50.80778 | Ref | -0.54 | -0.02 | -0.38 | -0.16  | 0.27  | -0.5  | 0.22 | 2E+05 | 128000 | 2E+05 | 174000 | 224000 | 3E+05 | 2E+05 | 263000 | 660.4 | 1318.7 | 2 | 0.0103 | 7.839 |
| Tropomyosin alpha-4 chain OS=Equus caballus GN=TPM4 PE=1 SV=2 | sp P02561 TPM4_HORSE,sp P67936 TPM4_HUMAN,sp P67937 TPM4_PIG,trans D0G7F7 D0G7F7_PIG,trans E2R662 E2R662_CANF A,trans F7GGJ7 F7GGJ7_MONDO | aEVS ELK    | 51% | 31.1 | 51.71753 | Ref | -0.6  | -0.05 | -0.34 | -0.082 | 0.19  | -0.55 | 0.24 | 3E+05 | 139000 | 2E+05 | 203000 | 267000 | 3E+05 | 2E+05 | 302000 | 692.4 | 1382.8 | 2 | 0.0158 | 11.45 |
| Tropomyosin alpha-4 chain OS=Equus caballus GN=TPM4 PE=1 SV=2 | sp P02561 TPM4_HORSE,sp P67936 TPM4_HUMAN,sp P67937 TPM4_PIG,trans D0G7F7 D0G7F7_PIG,trans E2R662 E2R662_CANF A,trans F7GGJ7 F7GGJ7_MONDO | aGLNSLE AVK | 95% | 60.7 | 51.53116 | Ref | -0.51 | 0.31  | -0.18 | -0.21  | 0.075 | -0.9  | 0.2  | 1000  | 615    | 1180  | 941    | 1020   | 1080  | 575   | 1230   | 674.4 | 1346.8 | 2 | 0.0132 | 9.767 |

|                                                               |                                                                                                                                 |            |     |      |          |     |        |      |       |       |       |       |       |      |      |      |      |      |      |      |      |       |        |   |        |       |
|---------------------------------------------------------------|---------------------------------------------------------------------------------------------------------------------------------|------------|-----|------|----------|-----|--------|------|-------|-------|-------|-------|-------|------|------|------|------|------|------|------|------|-------|--------|---|--------|-------|
| Tropomyosin alpha-4 chain OS=Equus caballus GN=TPM4 PE=1 SV=2 | sp P02561 TPM4_HORSE,sp P67936 TPM4_HUMAN,sp P67937 TPM4_PIG,tr D0G7F7 D0G7F7_PIG,tr E2R662 E2R662_CANFA,tr F7GGJ7 F7GGJ7_MONDO | aGLNSLEAVk | 95% | 60   | 51.54987 | Ref | -0.083 | -0   | -0.48 | -0.32 | 0.18  | -0.54 | -0.11 | 2730 | 1860 | 2130 | 1720 | 2120 | 2610 | 1650 | 2210 | 674.4 | 1346.8 | 2 | 0.0139 | 10.3  |
| Tropomyosin alpha-4 chain OS=Equus caballus GN=TPM4 PE=1 SV=2 | sp P02561 TPM4_HORSE,sp P67936 TPM4_HUMAN,sp P67937 TPM4_PIG,tr D0G7F7 D0G7F7_PIG,tr E2R662 E2R662_CANFA,tr F7GGJ7 F7GGJ7_MONDO | aGLnSLEAVk | 95% | 55.3 | 51.90029 | Ref | 0.15   | 0.17 | -0.49 | -0.62 | -0.19 | -0.33 | -0.03 | 1220 | 1020 | 1120 | 798  | 804  | 946  | 894  | 1100 | 674.9 | 1347.7 | 2 | 0.0176 | 13.01 |
| Tropomyosin alpha-4 chain OS=Equus caballus GN=TPM4 PE=1 SV=2 | sp P02561 TPM4_HORSE,sp P67936 TPM4_HUMAN,sp P67937 TPM4_PIG,tr D0G7F7 D0G7F7_PIG,tr E2R662 E2R662_CANFA,tr F7GGJ7 F7GGJ7_MONDO | aGLnSLEAVk | 95% | 47.6 | 51.90475 | Ref | 0.032  | 0.35 | -0.65 | -0.62 | -0.22 | -0.18 | -0.02 | 681  | 553  | 749  | 421  | 473  | 546  | 586  | 649  | 674.9 | 1347.7 | 2 | 0.0171 | 12.66 |

|                                                               |                                                                                                                                       |                   |     |      |          |     |       |       |       |       |       |       |       |       |       |       |       |       |       |       |       |       |        |   |        |       |
|---------------------------------------------------------------|---------------------------------------------------------------------------------------------------------------------------------------|-------------------|-----|------|----------|-----|-------|-------|-------|-------|-------|-------|-------|-------|-------|-------|-------|-------|-------|-------|-------|-------|--------|---|--------|-------|
| Tropomyosin alpha-4 chain OS=Equus caballus GN=TPM4 PE=1 SV=2 | sp P02561 TPM4_HORSE,sp P67936 TPM4_HUMAN,sp P67937 TPM4_PIG,tron D0G7F7 D0G7F7_PIG,tron E2R662 E2R662_CANFA,tron F7GGJ7 F7GGJ7_MONDO | cGDL<br>EEEL<br>k | 56% | 31.8 | 51.48902 | Ref | -0.07 | -0.12 | -0.34 | -0.12 | 0.008 | -0.34 | 0.008 | 42500 | 34200 | 35900 | 34500 | 44200 | 42300 | 34700 | 43800 | 564   | 1688.8 | 3 | 0.0169 | 10    |
| Tropomyosin alpha-4 chain OS=Equus caballus GN=TPM4 PE=1 SV=2 | sp P02561 TPM4_HORSE,sp P67936 TPM4_HUMAN,sp P67937 TPM4_PIG,tron D0G7F7 D0G7F7_PIG,tron E2R662 E2R662_CANFA,tron F7GGJ7 F7GGJ7_MONDO | cGDL<br>EEEL<br>k | 65% | 33.1 | 51.51272 | Ref | -0.58 | 0.019 | -0.29 | -0.14 | 0.033 | -0.47 | 0.056 | 20500 | 9820  | 16100 | 14600 | 17900 | 17600 | 13000 | 18500 | 845.4 | 1688.8 | 2 | 0.0157 | 9.308 |
| Tropomyosin alpha-4 chain OS=Equus caballus GN=TPM4 PE=1 SV=2 | sp P02561 TPM4_HORSE,sp P67936 TPM4_HUMAN,sp P67937 TPM4_PIG,tron D0G7F7 D0G7F7_PIG,tron E2R662 E2R662_CANFA,tron F7GGJ7 F7GGJ7_MONDO | cGDL<br>EEEL<br>k | 74% | 35.4 | 51.69136 | Ref | -0.32 | -0.13 | -0.26 | -0.3  | 0.023 | -0.49 | 0.12  | 10500 | 5900  | 7270  | 7480  | 8020  | 8750  | 6400  | 9700  | 845.4 | 1688.8 | 2 | 0.0097 | 5.77  |

|                                                               |                                                                                                                                       |                                |     |      |          |     |       |       |       |       |       |       |      |       |       |       |       |       |       |       |       |       |        |   |        |       |
|---------------------------------------------------------------|---------------------------------------------------------------------------------------------------------------------------------------|--------------------------------|-----|------|----------|-----|-------|-------|-------|-------|-------|-------|------|-------|-------|-------|-------|-------|-------|-------|-------|-------|--------|---|--------|-------|
| Tropomyosin alpha-4 chain OS=Equus caballus GN=TPM4 PE=1 SV=2 | sp P02561 TPM4_HORSE,sp P67936 TPM4_HUMAN,sp P67937 TPM4_PIG,tron D0G7F7 D0G7F7_PIG,tron E2R662 E2R662_CANFA,tron F7GGJ7 F7GGJ7_MONDO | hIAE<br>EAD<br>R               | 74% | 34.6 | 50.20245 | Ref | -0.44 | 0.091 | -0.17 | -0.24 | 0.22  | -0.7  | 0.11 | 35000 | 22000 | 34500 | 32300 | 33900 | 40700 | 22500 | 39300 | 415.6 | 1243.6 | 3 | 0.0108 | 8.671 |
| Tropomyosin alpha-4 chain OS=Equus caballus GN=TPM4 PE=1 SV=2 | sp P02561 TPM4_HORSE,sp P67936 TPM4_HUMAN,sp P67937 TPM4_PIG,tron D0G7F7 D0G7F7_PIG,tron E2R662 E2R662_CANFA,tron F7GGJ7 F7GGJ7_MONDO | hIAE<br>EAD<br>R               | 78% | 35.7 | 50.20519 | Ref | -0.51 | 0.11  | -0.28 | -0.18 | 0.12  | -0.51 | 0.2  | 37300 | 23200 | 38800 | 33100 | 39300 | 42200 | 28500 | 46100 | 415.6 | 1243.6 | 3 | 0.0107 | 8.599 |
| Tropomyosin alpha-4 chain OS=Equus caballus GN=TPM4 PE=1 SV=2 | sp P02561 TPM4_HORSE,sp P67936 TPM4_HUMAN,sp P67937 TPM4_PIG,tron D0G7F7 D0G7F7_PIG,tron E2R662 E2R662_CANFA,tron F7GGJ7 F7GGJ7_MONDO | IQAL<br>QQQ<br>ADE<br>AED<br>R | 95% | 72.1 | 52.89125 | Ref | -0.43 | 0.091 | -0.39 | -0.18 | 0.011 | -0.28 | 0.11 | 8100  | 5010  | 7780  | 6240  | 8000  | 7950  | 6790  | 8830  | 960   | 1918   | 2 | 0.0044 | 2.281 |



|                                                               |                                                                                                                                 |                    |     |      |          |     |       |      |       |        |       |       |       |       |       |       |       |        |       |       |        |       |        |   |        |       |
|---------------------------------------------------------------|---------------------------------------------------------------------------------------------------------------------------------|--------------------|-----|------|----------|-----|-------|------|-------|--------|-------|-------|-------|-------|-------|-------|-------|--------|-------|-------|--------|-------|--------|---|--------|-------|
| Tropomyosin alpha-4 chain OS=Equus caballus GN=TPM4 PE=1 SV=2 | sp P02561 TPM4_HORSE,sp P67936 TPM4_HUMAN,sp P67937 TPM4_PIG,triD0G7F7 D0G7F7_PIG,triE2R662 E2R662_CANFA,triF7GGJ7 F7GGJ7_MONDO | iQLV<br>EEEL<br>DR | 94% | 46.3 | 52.39497 | Ref | -0.51 | 0.45 | -0.62 | -0.062 | 0.077 | -0.45 | -0.23 | 1E+05 | 81700 | 2E+05 | 91900 | 149000 | 1E+05 | 1E+05 | 120000 | 774.4 | 1546.8 | 2 | 0.0056 | 3.617 |
| Tropomyosin alpha-4 chain OS=Equus caballus GN=TPM4 PE=1 SV=2 | sp P02561 TPM4_HORSE,sp P67936 TPM4_HUMAN,sp P67937 TPM4_PIG,triD0G7F7 D0G7F7_PIG,triE2R662 E2R662_CANFA,triF7GGJ7 F7GGJ7_MONDO | iQLV<br>EEEL<br>DR | 95% | 49   | 52.38994 | Ref | -0.45 | 0.35 | -0.49 | -0.22  | -0.09 | -0.2  | -0.19 | 2620  | 1450  | 2730  | 1720  | 2290   | 2180  | 2110  | 2110   | 774.4 | 1546.8 | 2 | 0.0121 | 7.79  |
| Tropomyosin alpha-4 chain OS=Equus caballus GN=TPM4 PE=1 SV=2 | sp P02561 TPM4_HORSE,sp P67936 TPM4_HUMAN,sp P67937 TPM4_PIG,triD0G7F7 D0G7F7_PIG,triE2R662 E2R662_CANFA,triF7GGJ7 F7GGJ7_MONDO | iQLV<br>EEEL<br>DR | 94% | 46.1 | 52.33138 | Ref | -0.5  | 0.36 | -0.54 | -0.22  | 0.013 | -0.18 | -0.11 | 2870  | 1670  | 3300  | 1970  | 2720   | 2790  | 2550  | 2650   | 774.4 | 1546.8 | 2 | 0.0116 | 7.48  |

|                                                               |                                                                                                                                 |                    |     |      |          |     |       |      |       |       |       |       |       |      |      |      |      |      |      |      |      |       |        |   |        |       |
|---------------------------------------------------------------|---------------------------------------------------------------------------------------------------------------------------------|--------------------|-----|------|----------|-----|-------|------|-------|-------|-------|-------|-------|------|------|------|------|------|------|------|------|-------|--------|---|--------|-------|
| Tropomyosin alpha-4 chain OS=Equus caballus GN=TPM4 PE=1 SV=2 | sp P02561 TPM4_HORSE,sp P67936 TPM4_HUMAN,sp P67937 TPM4_PIG,triD0G7F7 D0G7F7_PIG,triE2R662 E2R662_CANFA,triF7GGJ7 F7GGJ7_MONDO | iQLV<br>EEEL<br>DR | 79% | 37.3 | 52.28772 | Ref | -0.53 | 0.3  | -0.43 | 0.024 | 0.028 | -0.3  | -0.04 | 2070 | 1330 | 2560 | 1730 | 2620 | 2300 | 1910 | 2270 | 774.4 | 1546.8 | 2 | 0.0083 | 5.348 |
| Tropomyosin alpha-4 chain OS=Equus caballus GN=TPM4 PE=1 SV=2 | sp P02561 TPM4_HORSE,sp P67936 TPM4_HUMAN,sp P67937 TPM4_PIG,triD0G7F7 D0G7F7_PIG,triE2R662 E2R662_CANFA,triF7GGJ7 F7GGJ7_MONDO | iQLV<br>EEEL<br>DR | 73% | 35.9 | 52.56576 | Ref | -0.25 | 0.2  | -0.52 | -0.14 | -0.01 | -0.25 | -0.05 | 1470 | 1060 | 1560 | 1070 | 1530 | 1460 | 1300 | 1480 | 774.4 | 1546.8 | 2 | 0.0024 | 1.562 |
| Tropomyosin alpha-4 chain OS=Equus caballus GN=TPM4 PE=1 SV=2 | sp P02561 TPM4_HORSE,sp P67936 TPM4_HUMAN,sp P67937 TPM4_PIG,triD0G7F7 D0G7F7_PIG,triE2R662 E2R662_CANFA,triF7GGJ7 F7GGJ7_MONDO | iQLV<br>EEEL<br>DR | 95% | 53.4 | 52.41823 | Ref | -0.52 | 0.19 | -0.35 | -0.19 | -0.22 | -0.1  | -0.1  | 644  | 330  | 587  | 453  | 558  | 477  | 541  | 538  | 774.4 | 1546.8 | 2 | 0.0064 | 4.159 |

|                                                               |                                                                                                                                   |                                 |     |      |          |     |       |       |       |        |       |       |      |      |      |      |      |      |      |      |      |       |        |   |        |       |
|---------------------------------------------------------------|-----------------------------------------------------------------------------------------------------------------------------------|---------------------------------|-----|------|----------|-----|-------|-------|-------|--------|-------|-------|------|------|------|------|------|------|------|------|------|-------|--------|---|--------|-------|
| Tropomyosin alpha-4 chain OS=Equus caballus GN=TPM4 PE=1 SV=2 | sp P02561 TPM4_HORSE,sp P67936 TPM4_HUMAN,sp P67937 TPM4_PIG,triD0G7F7 D0G7F7_PIG,triE2R662 E2R662_CANF A,triF7GGJ7 F7GGJ7_MOND O | iQLV<br>EEEL<br>DRA<br>QER      | 52% | 33.8 | 54.10924 | Ref | -0.47 | 0.002 | -0.37 | -0.047 | 0.15  | -0.14 | 0.28 | 654  | 569  | 855  | 739  | 1020 | 1020 | 873  | 1160 | 678   | 2031.1 | 3 | 0.0135 | 6.631 |
| Tropomyosin alpha-4 chain OS=Equus caballus GN=TPM4 PE=1 SV=2 | sp P02561 TPM4_HORSE,sp P67936 TPM4_HUMAN,sp P67937 TPM4_PIG,triD0G7F7 D0G7F7_PIG,triE2R662 E2R662_CANF A,triF7GGJ7 F7GGJ7_MOND O | kiQA<br>LQQ<br>QAD<br>EAE<br>DR | 84% | 42.8 | 54.76839 | Ref | -0.32 | -0.19 | -0.08 | -0.13  | 0.088 | -0.31 | 0.12 | 5250 | 3990 | 4730 | 5740 | 6100 | 6190 | 4900 | 6550 | 784.4 | 2350.2 | 3 | 0.0253 | 10.77 |
| Tropomyosin alpha-4 chain OS=Equus caballus GN=TPM4 PE=1 SV=2 | sp P02561 TPM4_HORSE,sp P67936 TPM4_HUMAN,sp P67937 TPM4_PIG,triD0G7F7 D0G7F7_PIG,triE2R662 E2R662_CANF A,triF7GGJ7 F7GGJ7_MOND O | kiQA<br>LQQ<br>QAD<br>EAE<br>DR | 95% | 72.6 | 54.7773  | Ref | -0.49 | 0.12  | -0.23 | -0.29  | 0.19  | -0.49 | 0.17 | 7950 | 5080 | 8430 | 7430 | 7840 | 9550 | 6200 | 9750 | 784.4 | 2350.2 | 3 | 0.0215 | 9.126 |

|                                                               |                                                                                                                                      |                                 |     |      |          |     |       |       |       |        |       |       |      |       |      |       |       |       |       |       |       |       |        |   |        |       |
|---------------------------------------------------------------|--------------------------------------------------------------------------------------------------------------------------------------|---------------------------------|-----|------|----------|-----|-------|-------|-------|--------|-------|-------|------|-------|------|-------|-------|-------|-------|-------|-------|-------|--------|---|--------|-------|
| Tropomyosin alpha-4 chain OS=Equus caballus GN=TPM4 PE=1 SV=2 | sp P02561 TPM4_HORSE,sp P67936 TPM4_HUMAN,sp P67937 TPM4_PIG,tri D0G7F7 D0G7F7_PIG,tri E2R662 E2R662_CANF A,tri F7GGJ7 F7GGJ7_MOND O | KIQA<br>LQQ<br>QAD<br>EAE<br>DR | 84% | 42.7 | 54.77318 | Ref | -0.27 | -0.03 | -0.2  | -0.19  | -0.06 | -0.23 | 0.14 | 10600 | 8100 | 10400 | 10400 | 11500 | 11000 | 10200 | 13100 | 784.4 | 2350.3 | 3 | 0.0206 | 8.743 |
| Tropomyosin alpha-4 chain OS=Equus caballus GN=TPM4 PE=1 SV=2 | sp P02561 TPM4_HORSE,sp P67936 TPM4_HUMAN,sp P67937 TPM4_PIG,tri D0G7F7 D0G7F7_PIG,tri E2R662 E2R662_CANF A,tri F7GGJ7 F7GGJ7_MOND O | KIQA<br>LQQ<br>QAD<br>EAE<br>DR | 92% | 48.7 | 54.78451 | Ref | -0.13 | 0.034 | -0.23 | -0.24  | -0.07 | -0.35 | 0.1  | 6890  | 5700 | 6910  | 6460  | 7060  | 6940  | 5960  | 8100  | 784.4 | 2350.3 | 3 | 0.0202 | 8.59  |
| Tropomyosin alpha-4 chain OS=Equus caballus GN=TPM4 PE=1 SV=2 | sp P02561 TPM4_HORSE,sp P67936 TPM4_HUMAN,sp P67937 TPM4_PIG,tri D0G7F7 D0G7F7_PIG,tri E2R662 E2R662_CANF A,tri F7GGJ7 F7GGJ7_MOND O | KIQA<br>LQQ<br>QAD<br>EAE<br>DR | 95% | 73.1 | 54.74796 | Ref | -0.49 | -0.01 | -0.24 | -0.016 | -0.03 | -0.33 | 0.14 | 12500 | 7820 | 11800 | 11300 | 14600 | 12600 | 10700 | 14700 | 784.4 | 2350.3 | 3 | 0.0191 | 8.118 |

|                                                               |                                                                                                                                 |                                 |     |      |          |     |       |       |      |        |       |       |       |       |       |       |       |       |       |       |       |       |        |   |        |       |
|---------------------------------------------------------------|---------------------------------------------------------------------------------------------------------------------------------|---------------------------------|-----|------|----------|-----|-------|-------|------|--------|-------|-------|-------|-------|-------|-------|-------|-------|-------|-------|-------|-------|--------|---|--------|-------|
| Tropomyosin alpha-4 chain OS=Equus caballus GN=TPM4 PE=1 SV=2 | sp P02561 TPM4_HORSE,sp P67936 TPM4_HUMAN,sp P67937 TPM4_PIG,triD0G7F7 D0G7F7_PIG,triE2R662 E2R662_CANFA,triF7GGJ7 F7GGJ7_MONDO | KIQA<br>LQQ<br>QAD<br>EAE<br>DR | 95% | 90.7 | 54.79657 | Ref | -0.7  | -0.08 | -0.3 | -0.08  | 0.074 | -0.44 | 0.39  | 51500 | 28000 | 46700 | 44800 | 57600 | 56000 | 40900 | 72400 | 784.4 | 2350.2 | 3 | 0.0218 | 9.292 |
| Tropomyosin alpha-4 chain OS=Equus caballus GN=TPM4 PE=1 SV=2 | sp P02561 TPM4_HORSE,sp P67936 TPM4_HUMAN,sp P67937 TPM4_PIG,triD0G7F7 D0G7F7_PIG,triE2R662 E2R662_CANFA,triF7GGJ7 F7GGJ7_MONDO | KIQA<br>LQQ<br>QAD<br>EAE<br>DR | 95% | 58.3 | 54.77318 | Ref | -0.7  | 0.097 | -0.4 | -0.061 | 0.25  | -0.6  | 0.22  | 34000 | 18200 | 34300 | 27400 | 38000 | 41200 | 23900 | 41700 | 784.4 | 2350.3 | 3 | 0.0206 | 8.743 |
| Tropomyosin alpha-4 chain OS=Equus caballus GN=TPM4 PE=1 SV=2 | sp P02561 TPM4_HORSE,sp P67936 TPM4_HUMAN,sp P67937 TPM4_PIG,triD0G7F7 D0G7F7_PIG,triE2R662 E2R662_CANFA,triF7GGJ7 F7GGJ7_MONDO | kLVIL<br>EGEL<br>ER             | 68% | 32.1 | 49.39265 | Ref | -0.57 | 0.41  | -0.3 | -0.16  | 0.028 | -0.21 | -0.14 | 11800 | 7550  | 16200 | 11100 | 13500 | 13400 | 11800 | 12300 | 636.4 | 1906.2 | 3 | 0.0101 | 5.273 |

|                                                               |                                                                                                                                       |             |     |      |          |     |       |       |       |       |       |       |       |       |      |       |      |       |       |      |       |       |        |   |        |       |
|---------------------------------------------------------------|---------------------------------------------------------------------------------------------------------------------------------------|-------------|-----|------|----------|-----|-------|-------|-------|-------|-------|-------|-------|-------|------|-------|------|-------|-------|------|-------|-------|--------|---|--------|-------|
| Tropomyosin alpha-4 chain OS=Equus caballus GN=TPM4 PE=1 SV=2 | sp P02561 TPM4_HORSE,sp P67936 TPM4_HUMAN,sp P67937 TPM4_PIG,tron D0G7F7 D0G7F7_PIG,tron E2R662 E2R662_CANFA,tron F7GGJ7 F7GGJ7_MONDO | kLVILEGELER | 79% | 35.3 | 49.57301 | Ref | -0.9  | 0.22  | -0.18 | 0.076 | 0.046 | -0.41 | -0.14 | 11300 | 4880 | 11500 | 9760 | 12900 | 11000 | 8400 | 10000 | 636.4 | 1906.2 | 3 | 0.0124 | 6.516 |
| Tropomyosin alpha-4 chain OS=Equus caballus GN=TPM4 PE=1 SV=2 | sp P02561 TPM4_HORSE,sp P67936 TPM4_HUMAN,sp P67937 TPM4_PIG,tron D0G7F7 D0G7F7_PIG,tron E2R662 E2R662_CANFA,tron F7GGJ7 F7GGJ7_MONDO | kLVILEGELER | 65% | 29.4 | 49.25379 | Ref | -0.46 | -0.05 | -0.25 | -0.13 | 0.006 | 0.071 | -0.02 | 1420  | 964  | 1390  | 1360 | 1630  | 1560  | 1710 | 1590  | 477.5 | 1906.2 | 4 | 0.0074 | 3.902 |
| Tropomyosin alpha-4 chain OS=Equus caballus GN=TPM4 PE=1 SV=2 | sp P02561 TPM4_HORSE,sp P67936 TPM4_HUMAN,sp P67937 TPM4_PIG,tron D0G7F7 D0G7F7_PIG,tron E2R662 E2R662_CANFA,tron F7GGJ7 F7GGJ7_MONDO | kLVILEGELER | 72% | 32.5 | 48.88337 | Ref | -0.17 | -0.15 | -0.2  | -0.11 | 0.19  | -0.21 | -0.14 | 694   | 586  | 642   | 695  | 818   | 879   | 695  | 726   | 636.4 | 1906.2 | 3 | 0.002  | 1.057 |

|                                                               |                                                                                                                                       |             |     |      |          |     |       |       |       |        |       |       |       |       |       |       |       |       |       |       |       |       |        |   |        |       |
|---------------------------------------------------------------|---------------------------------------------------------------------------------------------------------------------------------------|-------------|-----|------|----------|-----|-------|-------|-------|--------|-------|-------|-------|-------|-------|-------|-------|-------|-------|-------|-------|-------|--------|---|--------|-------|
| Tropomyosin alpha-4 chain OS=Equus caballus GN=TPM4 PE=1 SV=2 | sp P02561 TPM4_HORSE,sp P67936 TPM4_HUMAN,sp P67937 TPM4_PIG,tron D0G7F7 D0G7F7_PIG,tron E2R662 E2R662_CANFA,tron F7GGJ7 F7GGJ7_MONDO | IVILEGELE   | 59% | 32.2 | 51.6123  | Ref | -0.2  | -0.11 | -0.45 | -0.13  | 0.2   | -0.48 | 0.14  | 577   | 437   | 503   | 448   | 615   | 673   | 441   | 674   | 737.9 | 1473.9 | 2 | 0.0064 | 4.365 |
| Tropomyosin alpha-4 chain OS=Equus caballus GN=TPM4 PE=1 SV=2 | sp P02561 TPM4_HORSE,sp P67936 TPM4_HUMAN,sp P67937 TPM4_PIG,tron D0G7F7 D0G7F7_PIG,tron E2R662 E2R662_CANFA,tron F7GGJ7 F7GGJ7_MONDO | mEI QEM QLk | 87% | 41.5 | 53.20975 | Ref | -0.98 | 0.83  | -0.86 | 0.075  | -0.47 | 0.11  | -0.85 | 13000 | 4900  | 18700 | 6480  | 13700 | 8200  | 12800 | 6530  | 879.5 | 1756.9 | 2 | 0.0207 | 11.8  |
| Tropomyosin alpha-4 chain OS=Equus caballus GN=TPM4 PE=1 SV=2 | sp P02561 TPM4_HORSE,sp P67936 TPM4_HUMAN,sp P67937 TPM4_PIG,tron D0G7F7 D0G7F7_PIG,tron E2R662 E2R662_CANFA,tron F7GGJ7 F7GGJ7_MONDO | mEI QEM QLk | 95% | 55.2 | 53.20105 | Ref | -0.59 | 0.071 | -0.42 | -0.038 | 0.41  | -0.78 | -0.02 | 24400 | 13100 | 22500 | 18000 | 25800 | 30700 | 14100 | 23700 | 879.5 | 1757   | 2 | 0.0176 | 9.987 |

|                                                               |                                                                                                                                       |                     |     |      |          |     |       |       |       |        |       |       |       |       |       |       |       |       |       |       |       |       |        |   |        |       |
|---------------------------------------------------------------|---------------------------------------------------------------------------------------------------------------------------------------|---------------------|-----|------|----------|-----|-------|-------|-------|--------|-------|-------|-------|-------|-------|-------|-------|-------|-------|-------|-------|-------|--------|---|--------|-------|
| Tropomyosin alpha-4 chain OS=Equus caballus GN=TPM4 PE=1 SV=2 | sp P02561 TPM4_HORSE,sp P67936 TPM4_HUMAN,sp P67937 TPM4_PIG,tron D0G7F7 D0G7F7_PIG,tron E2R662 E2R662_CANFA,tron F7GGJ7 F7GGJ7_MONDO | nVTn<br>NLk         | 67% | 33.9 | 51.81103 | Ref | -0.32 | -0.03 | -0.25 | -0.16  | 0.029 | -0.39 | 0.12  | 39800 | 27100 | 36000 | 34600 | 40800 | 40500 | 31700 | 44700 | 706.4 | 1410.8 | 2 | 0.0057 | 4.041 |
| Tropomyosin alpha-4 chain OS=Equus caballus GN=TPM4 PE=1 SV=2 | sp P02561 TPM4_HORSE,sp P67936 TPM4_HUMAN,sp P67937 TPM4_PIG,tron D0G7F7 D0G7F7_PIG,tron E2R662 E2R662_CANFA,tron F7GGJ7 F7GGJ7_MONDO | rIQL<br>VEEE<br>LDR | 93% | 47.9 | 52.64631 | Ref | -0.26 | 0.094 | -0.07 | -0.15  | -0.07 | -0.15 | -0.18 | 4260  | 3360  | 4680  | 4690  | 4870  | 4510  | 4470  | 4340  | 568.7 | 1703   | 3 | #####  | 0.553 |
| Tropomyosin alpha-4 chain OS=Equus caballus GN=TPM4 PE=1 SV=2 | sp P02561 TPM4_HORSE,sp P67936 TPM4_HUMAN,sp P67937 TPM4_PIG,tron D0G7F7 D0G7F7_PIG,tron E2R662 E2R662_CANFA,tron F7GGJ7 F7GGJ7_MONDO | rIQL<br>VEEE<br>LDR | 93% | 48   | 52.84164 | Ref | -0.44 | 0.42  | -0.15 | -0.005 | -0.22 | -0.4  | -0.11 | 17000 | 12200 | 24000 | 18100 | 22100 | 16600 | 15300 | 18600 | 568.7 | 1702.9 | 3 | 0.0121 | 7.088 |



|                                                               |                                                                                                                                   |                 |     |      |          |     |       |       |       |        |       |       |       |       |       |       |       |       |       |       |       |       |        |   |        |       |
|---------------------------------------------------------------|-----------------------------------------------------------------------------------------------------------------------------------|-----------------|-----|------|----------|-----|-------|-------|-------|--------|-------|-------|-------|-------|-------|-------|-------|-------|-------|-------|-------|-------|--------|---|--------|-------|
| Tropomyosin alpha-4 chain OS=Equus caballus GN=TPM4 PE=1 SV=2 | sp P02561 TPM4_HORSE,sp P67936 TPM4_HUMAN,sp P67937 TPM4_PIG,tr D0G7F7 D0G7F7_PIG,tr E2R662 E2R662_CANF A,tr F7GGJ7 F7GGJ7_MOND O | rIQLVEEE<br>LDR | 86% | 42.1 | 52.78941 | Ref | -0.28 | -0.05 | -0.04 | -0.057 | -0.02 | -0.4  | -0.02 | 8680  | 6490  | 8280  | 9360  | 10200 | 9080  | 7280  | 9440  | 568.7 | 1702.9 | 3 | 0.0044 | 2.564 |
| Tropomyosin alpha-4 chain OS=Equus caballus GN=TPM4 PE=1 SV=2 | sp P02561 TPM4_HORSE,sp P67936 TPM4_HUMAN,sp P67937 TPM4_PIG,tr D0G7F7 D0G7F7_PIG,tr E2R662 E2R662_CANF A,tr F7GGJ7 F7GGJ7_MOND O | rIQLVEEE<br>LDR | 66% | 34.6 | 52.71126 | Ref | -0.5  | 0.17  | -0.1  | -0.047 | -0.11 | -0.26 | -0.25 | 1450  | 830   | 1440  | 1340  | 1530  | 1280  | 1200  | 1200  | 852.5 | 1702.9 | 2 | 0.0027 | 1.557 |
| Tropomyosin alpha-4 chain OS=Equus caballus GN=TPM4 PE=1 SV=2 | sp P02561 TPM4_HORSE,sp P67936 TPM4_HUMAN,sp P67937 TPM4_PIG,tr D0G7F7 D0G7F7_PIG,tr E2R662 E2R662_CANF A,tr F7GGJ7 F7GGJ7_MOND O | sLEAASEK        | 93% | 44.5 | 52.04728 | Ref | -0.55 | -0.09 | -0.45 | -0.057 | 0.16  | -0.57 | 0.4   | 30800 | 18500 | 27800 | 24200 | 35100 | 35700 | 22400 | 43600 | 721.9 | 1441.8 | 2 | 0.0251 | 17.41 |

|                                                               |                                                                                                                                        |              |     |      |          |     |       |       |       |        |      |       |       |       |       |       |        |        |       |       |        |       |        |   |        |       |
|---------------------------------------------------------------|----------------------------------------------------------------------------------------------------------------------------------------|--------------|-----|------|----------|-----|-------|-------|-------|--------|------|-------|-------|-------|-------|-------|--------|--------|-------|-------|--------|-------|--------|---|--------|-------|
| Tropomyosin alpha-4 chain OS=Equus caballus GN=TPM4 PE=1 SV=2 | sp P02561 TPM4_HORSE,sp P67936 TPM4_HUMAN,sp P67937 TPM4_PIG,tron D0G7F7 D0G7F7_PIG,tron E2R662 E2R662_CANF A,tron F7GGJ7 F7GGJ7_MONDO | sLEA<br>ASEK | 75% | 35.9 | 52.11046 | Ref | -0.7  | 0.024 | -0.24 | -0.078 | 0.33 | -0.67 | 0.17  | 1E+05 | 74400 | 1E+05 | 124000 | 154000 | 2E+05 | 93000 | 165000 | 721.9 | 1441.8 | 2 | 0.0185 | 12.85 |
| Tropomyosin alpha-4 chain OS=Equus caballus GN=TPM4 PE=1 SV=2 | sp P02561 TPM4_HORSE,sp P67936 TPM4_HUMAN,sp P67937 TPM4_PIG,tron D0G7F7 D0G7F7_PIG,tron E2R662 E2R662_CANF A,tron F7GGJ7 F7GGJ7_MONDO | sLEA<br>ASEK | 52% | 31.5 | 51.75065 | Ref | -0.58 | 0.02  | -0.41 | -0.12  | 0.22 | -0.47 | 0.24  | 37600 | 22100 | 36300 | 30400  | 40700  | 45000 | 29200 | 47400  | 481.6 | 1441.8 | 3 | 0.0044 | 3.057 |
| Tropomyosin alpha-4 chain OS=Equus caballus GN=TPM4 PE=1 SV=2 | sp P02561 TPM4_HORSE,sp P67936 TPM4_HUMAN,sp P67937 TPM4_PIG,tron D0G7F7 D0G7F7_PIG,tron E2R662 E2R662_CANF A,tron F7GGJ7 F7GGJ7_MONDO | sLEA<br>ASEK | 84% | 38.9 | 52.05313 | Ref | -0.67 | 0.081 | -0.33 | -0.04  | 0.21 | -0.44 | 0.049 | 21600 | 11500 | 21000 | 17700  | 23900  | 24800 | 16500 | 23000  | 721.9 | 1441.8 | 2 | 0.0256 | 17.75 |

|                                                               |                                                                                                                                    |             |     |      |          |     |        |       |       |       |       |       |       |       |       |       |       |       |       |       |       |       |        |   |        |       |
|---------------------------------------------------------------|------------------------------------------------------------------------------------------------------------------------------------|-------------|-----|------|----------|-----|--------|-------|-------|-------|-------|-------|-------|-------|-------|-------|-------|-------|-------|-------|-------|-------|--------|---|--------|-------|
| Tropomyosin alpha-4 chain OS=Equus caballus GN=TPM4 PE=1 SV=2 | sp P02561 TPM4_HORSE,sp P67936 TPM4_HUMAN,sp P67937 TPM4_PIG,tri D0G7F7 D0G7F7_PIG,tri E2R662 E2R662_CANFA,tri F7GGJ7 F7GGJ7_MONDO | tIDDL       | 80% | 37.8 | 52.54756 | Ref | -0.64  | 0.13  | -0.29 | -0.17 | 0.19  | -0.55 | 0.19  | 10600 | 5870  | 10800 | 9070  | 10900 | 12300 | 7650  | 12600 | 785.9 | 1569.9 | 2 | 0.0193 | 12.26 |
| Hemoglobin fetal subunit beta OS=Bos taurus PE=1 SV=1         | sp P02081 HBBF_BOVIN                                                                                                               | aAVT SLFA k | 91% | 43.5 | 50.68931 | Ref | -0.18  | 0.076 | -0.15 | 0.14  | -0.52 | 0.6   | 0.24  | 9690  | 11300 | 14700 | 14100 | 18900 | 10500 | 23800 | 18400 | 506   | 1514.9 | 3 | 0.0269 | 17.74 |
| Hemoglobin fetal subunit beta OS=Bos taurus PE=1 SV=1         | sp P02081 HBBF_BOVIN                                                                                                               | aAVT SLFA k | 78% | 36.1 | 50.46905 | Ref | -0.31  | 0.29  | -0.23 | 0.24  | -0.58 | 0.55  | 0.088 | 31200 | 30000 | 49300 | 38700 | 59000 | 29200 | 66700 | 48100 | 506   | 1514.9 | 3 | 0.0154 | 10.14 |
| Hemoglobin fetal subunit beta OS=Bos taurus PE=1 SV=1         | sp P02081 HBBF_BOVIN                                                                                                               | aAVT SLFA k | 95% | 60.4 | 51.06126 | Ref | -0.022 | 0.22  | -0.11 | 0.13  | -0.4  | 0.56  | -0.26 | 7080  | 8120  | 10400 | 9300  | 12100 | 7310  | 14900 | 8390  | 758.5 | 1514.9 | 2 | 0.0252 | 16.65 |
| Hemoglobin fetal subunit beta OS=Bos taurus PE=1 SV=1         | sp P02081 HBBF_BOVIN                                                                                                               | aAVT SLFA k | 78% | 36.1 | 50.47064 | Ref | -0.11  | 0.35  | -0.3  | 0.085 | -0.46 | 0.61  | -0.01 | 46800 | 57300 | 85300 | 61100 | 87800 | 52500 | 1E+05 | 74300 | 506   | 1514.9 | 3 | 0.0177 | 11.64 |

|                                                             |                      |                      |     |      |          |     |                            |                            |       |                            |                            |       |       |      |                            |                            |                            |                            |      |      |      |       |      |        |        |       |
|-------------------------------------------------------------|----------------------|----------------------|-----|------|----------|-----|----------------------------|----------------------------|-------|----------------------------|----------------------------|-------|-------|------|----------------------------|----------------------------|----------------------------|----------------------------|------|------|------|-------|------|--------|--------|-------|
| Hemoglobin fetal subunit beta<br>OS=Bos taurus PE=1<br>SV=1 | sp P02081 HBBF_BOVIN | ILGN<br>VLVV<br>VLAR | 95% | 60.8 | 41.3615  | Ref | 0.084                      | -0.08                      | 0.03  | -0.063                     | -0.48                      | 0.5   | -0.27 | 994  | 886                        | 855                        | 1040                       | 1070                       | 701  | 1450 | 842  | 785.5 | 1569 | 2      | 0.0103 | 6.544 |
| Hemoglobin fetal subunit beta<br>OS=Bos taurus PE=1<br>SV=1 | sp P02081 HBBF_BOVIN | ILGN<br>VLVV<br>VLAR | 95% | 61.6 | 41.3615  | Ref | 0.2                        | -0.03                      | -0.11 | 0.11                       | -0.23                      | 0.22  | -0.55 | 219  | 191                        | 177                        | 188                        | 241                        | 166  | 237  | 139  | 524   | 1569 | 3      | 0.0119 | 7.584 |
| Hemoglobin fetal subunit beta<br>OS=Bos taurus PE=1<br>SV=1 | sp P02081 HBBF_BOVIN | ILGN<br>VLVV<br>VLAR | 95% | 65.8 | 43.56026 | Ref | -0.046                     | -0.33                      | -0.03 | 0.24                       | -0.33                      | 0.096 | 0.089 | 228  | 171                        | 153                        | 212                        | 281                        | 165  | 232  | 229  | 524   | 1569 | 3      | 0.0134 | 8.505 |
| Hemoglobin fetal subunit beta<br>OS=Bos taurus PE=1<br>SV=1 | sp P02081 HBBF_BOVIN | ILGN<br>VLVV<br>VLAR | 95% | 43.4 | 42.97279 | Ref | 0.03                       | -0.04                      | 0.008 | -0.057                     | -0.49                      | 0.54  | -0.19 | 3170 | 2900                       | 2990                       | 3470                       | 3660                       | 2370 | 5060 | 3020 | 785.5 | 1569 | 2      | 0.0106 | 6.743 |
| Hemoglobin fetal subunit beta<br>OS=Bos taurus PE=1<br>SV=1 | sp P02081 HBBF_BOVIN | ILGN<br>VLVV<br>VLAR | 95% | 40.7 | 42.7358  | Ref | -0.088                     | 0.15                       | -0.02 | -0.16                      | -0.63                      | 0.6   | -0.28 | 1330 | 1030                       | 1320                       | 1310                       | 1320                       | 827  | 2030 | 1100 | 785.5 | 1569 | 2      | 0.0074 | 4.73  |
| Hemoglobin fetal subunit beta<br>OS=Bos taurus PE=1<br>SV=1 | sp P02081 HBBF_BOVIN | ILGN<br>VLVV<br>VLAR | 95% | 50   | 42.71074 | Ref | Value Missing (-1.3099478) | Value Missing (-1.4276413) | 0.74  | Value Missing (-1.7347155) | Value Missing (-1.5388427) | 0.64  | 0.64  | 221  | Value Missing (-1.3099478) | Value Missing (-1.4276413) | Value Missing (-1.7347155) | Value Missing (-1.5388427) | 208  | 206  | 524  | 1569  | 3    | 0.0071 | 4.549  |       |

|                                                             |                      |                      |     |      |          |     |        |       |       |        |       |       |       |      |      |      |      |      |      |      |      |       |        |   |        |       |
|-------------------------------------------------------------|----------------------|----------------------|-----|------|----------|-----|--------|-------|-------|--------|-------|-------|-------|------|------|------|------|------|------|------|------|-------|--------|---|--------|-------|
| Hemoglobin fetal subunit beta<br>OS=Bos taurus PE=1<br>SV=1 | sp P02081 HBBF_BOVIN | ILGN<br>VLVV<br>VLAR | 84% | 31   | 42.97301 | Ref | -0.27  | -0.14 | -0.03 | -0.095 | 0.065 | -0.17 | 0.36  | 266  | 173  | 206  | 249  | 263  | 256  | 227  | 327  | 524   | 1569   | 3 | 0.0093 | 5.944 |
| Hemoglobin fetal subunit beta<br>OS=Bos taurus PE=1<br>SV=1 | sp P02081 HBBF_BOVIN | ILGN<br>VLVV<br>VLAR | 95% | 47.9 | 42.5691  | Ref | -0.062 | -0.14 | -0.03 | -0.15  | -0.35 | 0.8   | -0.29 | 636  | 598  | 616  | 746  | 756  | 575  | 1330 | 619  | 785.5 | 1569   | 2 | 0.0061 | 3.877 |
| Hemoglobin fetal subunit beta<br>OS=Bos taurus PE=1<br>SV=1 | sp P02081 HBBF_BOVIN | ILGN<br>VLVV<br>VLAR | 73% | 26.6 | 42.54959 | Ref | 0.031  | 0.11  | -0.02 | -0.31  | 0.16  | -0.51 | 0.011 | 276  | 197  | 225  | 232  | 208  | 252  | 166  | 235  | 524   | 1569   | 3 | 0.0046 | 2.906 |
| Hemoglobin fetal subunit beta<br>OS=Bos taurus PE=1<br>SV=1 | sp P02081 HBBF_BOVIN | ILGN<br>VLVV<br>VLAR | 81% | 29.3 | 42.71074 | Ref | 0.34   | -0.09 | -0.39 | -0.42  | -0.4  | 0.13  | 0.24  | 206  | 185  | 149  | 135  | 146  | 129  | 196  | 209  | 524   | 1569   | 3 | 0.0071 | 4.549 |
| Hemoglobin fetal subunit beta<br>OS=Bos taurus PE=1<br>SV=1 | sp P02081 HBBF_BOVIN | ILGN<br>VLVV<br>VLAR | 74% | 27.1 | 42.83482 | Ref | 0.12   | -0.1  | -0.02 | -0.3   | 0.38  | -0.19 | -0.19 | 128  | 111  | 103  | 122  | 111  | 155  | 109  | 108  | 524   | 1569   | 3 | 0.0086 | 5.466 |
| Hemoglobin fetal subunit beta<br>OS=Bos taurus PE=1<br>SV=1 | sp P02081 HBBF_BOVIN | ILVV<br>YPW<br>TQR   | 52% | 31.2 | 51.53592 | Ref | -0.35  | -0.2  | -0.18 | 0.043  | 0.11  | 0.61  | -0.32 | 3210 | 2190 | 2630 | 2990 | 3850 | 3530 | 5200 | 2720 | 527   | 1577.9 | 3 | 0.0119 | 7.522 |

|                                                             |                      |                           |     |      |          |     |                               |                               |                                |                                |                       |                               |                               |                               |                               |                               |                                |                                |                       |                               |                                |       |        |   |        |       |
|-------------------------------------------------------------|----------------------|---------------------------|-----|------|----------|-----|-------------------------------|-------------------------------|--------------------------------|--------------------------------|-----------------------|-------------------------------|-------------------------------|-------------------------------|-------------------------------|-------------------------------|--------------------------------|--------------------------------|-----------------------|-------------------------------|--------------------------------|-------|--------|---|--------|-------|
| Hemoglobin fetal subunit beta<br>OS=Bos taurus PE=1<br>SV=1 | sp P02081 HBBF_BOVIN | ILVV<br>yPW<br>TQR        | 63% | 32.6 | 50.87    | Ref | -0.17                         | 0.25                          | -0.11                          | 0.1                            | -0.46                 | 0.57                          | -0.18                         | 4360                          | 4180                          | 6100                          | 5340                           | 6780                           | 4010                  | 8560                          | 5060                           | 628.4 | 1882.1 | 3 | 0.0105 | 5.596 |
| Hemoglobin fetal subunit beta<br>OS=Bos taurus PE=1<br>SV=1 | sp P02081 HBBF_BOVIN | mLS<br>AEEK               | 63% | 30.6 | 49.4172  | Ref | Reference Missing (0.1478204) | Reference Missing (0.5309423) | Reference Missing (0.17302555) | Reference Missing (0.46697262) | No Values (-1.914995) | Reference Missing (0.7086124) | Reference Missing (0.0204946) | Reference Missing (1.8884946) | Reference Missing (0.1478204) | Reference Missing (0.5309423) | Reference Missing (0.17302555) | Reference Missing (0.46697262) | No Values (-1.914995) | Reference Missing (0.7086124) | Reference Missing (0.02046124) | 577.3 | 1152.6 | 2 | 0.0099 | 8.552 |
| Hemoglobin fetal subunit beta<br>OS=Bos taurus PE=1<br>SV=1 | sp P02081 HBBF_BOVIN | vDEV<br>GGE<br>ALG<br>R   | 76% | 35.6 | 51.50695 | Ref | 0.036                         | 0.31                          | -0.18                          | 0.013                          | -0.23                 | 0.41                          | -0.25                         | 54800                         | 61200                         | 80100                         | 64000                          | 80800                          | 59800                 | 97200                         | 61000                          | 703.4 | 1404.7 | 2 | 0.0112 | 7.976 |
| Hemoglobin fetal subunit beta<br>OS=Bos taurus PE=1<br>SV=1 | sp P02081 HBBF_BOVIN | vkVD<br>EVG<br>GEAL<br>GR | 57% | 33.1 | 52.78962 | Ref | -0.22                         | 0.23                          | 0.075                          | 0.33                           | -0.53                 | 0.6                           | -0.28                         | 2880                          | 3520                          | 5210                          | 5260                           | 6900                           | 3330                  | 7590                          | 4110                           | 969.1 | 1936.1 | 2 | 0.0197 | 10.19 |
| Hemoglobin fetal subunit beta<br>OS=Bos taurus PE=1<br>SV=1 | sp P02081 HBBF_BOVIN | vLDS<br>FcEG<br>Lk        | 87% | 43.1 | 53.37445 | Ref | -0.004                        | 0.11                          | -0.17                          | -0.12                          | -0.45                 | 0.47                          | -0                            | 2750                          | 2460                          | 2890                          | 2670                           | 3060                           | 2120                  | 4190                          | 2990                           | 589   | 1763.9 | 3 | #####  | 0.303 |
| Hemoglobin fetal subunit beta<br>OS=Bos taurus PE=1<br>SV=1 | sp P02081 HBBF_BOVIN | vLDS<br>FcEG<br>Lk        | 77% | 38.4 | 53.22582 | Ref | 0.1                           | 0.16                          | -0.14                          | -0.13                          | -0.48                 | 0.43                          | -0.25                         | 993                           | 876                           | 986                           | 899                            | 1000                           | 687                   | 1350                          | 831                            | 589   | 1763.9 | 3 | 0.0135 | 7.663 |

|                                                             |                      |                          |     |      |          |     |        |       |       |        |       |      |       |       |       |      |       |       |      |       |      |       |        |   |        |       |
|-------------------------------------------------------------|----------------------|--------------------------|-----|------|----------|-----|--------|-------|-------|--------|-------|------|-------|-------|-------|------|-------|-------|------|-------|------|-------|--------|---|--------|-------|
| Hemoglobin fetal subunit beta<br>OS=Bos taurus PE=1<br>SV=1 | sp P02081 HBBF_BOVIN | vVTG<br>VAN<br>ALA<br>HR | 95% | 67.6 | 51.74688 | Ref | 0.23   | 0.023 | 0.19  | -0.071 | -0.41 | 0.19 | -0.47 | 246   | 231   | 217  | 274   | 252   | 174  | 275   | 173  | 504.6 | 1510.9 | 3 | #####  | 0.225 |
| Hemoglobin fetal subunit beta<br>OS=Bos taurus PE=1<br>SV=1 | sp P02081 HBBF_BOVIN | vVTG<br>VAN<br>ALA<br>HR | 95% | 71.4 | 51.89617 | Ref | 0.27   | -0.18 | 0.08  | -0.15  | -0.28 | 0.35 | -0.36 | 10300 | 10200 | 8110 | 10900 | 10300 | 8150 | 13200 | 8000 | 504.6 | 1510.9 | 3 | 0.0114 | 7.573 |
| Hemoglobin fetal subunit beta<br>OS=Bos taurus PE=1<br>SV=1 | sp P02081 HBBF_BOVIN | vVTG<br>VAN<br>ALA<br>HR | 95% | 68   | 52.02393 | Ref | 0.33   | -0.13 | -0.11 | -0.1   | -0.37 | 0.33 | -0.21 | 3720  | 3880  | 3060 | 3490  | 3870  | 2800 | 4770  | 3250 | 504.6 | 1510.9 | 3 | 0.0077 | 5.093 |
| Hemoglobin fetal subunit beta<br>OS=Bos taurus PE=1<br>SV=1 | sp P02081 HBBF_BOVIN | vVTG<br>VAN<br>ALA<br>HR | 82% | 38   | 51.90119 | Ref | 0.15   | -0.02 | 0.052 | 0.033  | -0.42 | 0.37 | -0.09 | 2270  | 2610  | 2520 | 2970  | 3230  | 2060 | 3730  | 2680 | 756.4 | 1510.9 | 2 | 0.0117 | 7.735 |
| Hemoglobin fetal subunit beta<br>OS=Bos taurus PE=1<br>SV=1 | sp P02081 HBBF_BOVIN | vVTG<br>VAN<br>ALA<br>HR | 95% | 71.4 | 51.63835 | Ref | 0.26   | -0.01 | 0.058 | -0.14  | -0.25 | 0.12 | -0.12 | 4370  | 4600  | 4120 | 4860  | 4670  | 3770 | 5110  | 4280 | 504.6 | 1510.9 | 3 | 0.0092 | 6.065 |
| Hemoglobin fetal subunit beta<br>OS=Bos taurus PE=1<br>SV=1 | sp P02081 HBBF_BOVIN | vVTG<br>VAN<br>ALA<br>HR | 95% | 73.3 | 52.03794 | Ref | 0.0072 | -0.04 | 0.13  | -0.17  | -0.47 | 0.47 | -0.16 | 9720  | 8320  | 8720 | 11000 | 9880  | 7010 | 14000 | 8990 | 504.6 | 1510.9 | 3 | 0.0082 | 5.41  |

|                                                             |                      |                          |     |      |          |     |        |       |       |        |       |       |       |       |       |       |       |       |       |       |       |       |        |   |        |       |
|-------------------------------------------------------------|----------------------|--------------------------|-----|------|----------|-----|--------|-------|-------|--------|-------|-------|-------|-------|-------|-------|-------|-------|-------|-------|-------|-------|--------|---|--------|-------|
| Hemoglobin fetal subunit beta<br>OS=Bos taurus PE=1<br>SV=1 | sp P02081 HBBF_BOVIN | vVTG<br>VAN<br>ALA<br>HR | 95% | 50.7 | 52.02393 | Ref | 0.021  | 0.013 | -0    | 0.017  | -0.31 | 0.47  | -0.19 | 5220  | 5310  | 5730  | 6370  | 7110  | 4960  | 8880  | 5580  | 756.4 | 1510.9 | 2 | 0.0079 | 5.234 |
| Hemoglobin fetal subunit beta<br>OS=Bos taurus PE=1<br>SV=1 | sp P02081 HBBF_BOVIN | vVTG<br>VAN<br>ALA<br>HR | 95% | 83.5 | 52.0584  | Ref | -0.087 | 0.086 | 0.16  | 0.057  | -0.57 | 0.37  | -0.2  | 18000 | 15100 | 18400 | 21800 | 22300 | 12600 | 25300 | 16900 | 504.6 | 1510.9 | 3 | 0.0064 | 4.259 |
| Hemoglobin fetal subunit beta<br>OS=Bos taurus PE=1<br>SV=1 | sp P02081 HBBF_BOVIN | vVTG<br>VAN<br>ALA<br>HR | 95% | 74.5 | 51.80258 | Ref | 0.14   | 0.008 | -0.02 | -0.2   | -0.3  | 0.22  | -0.14 | 4970  | 4190  | 4150  | 4590  | 4460  | 3610  | 5410  | 4190  | 504.6 | 1510.9 | 3 | 0.0039 | 2.553 |
| Hemoglobin fetal subunit beta<br>OS=Bos taurus PE=1<br>SV=1 | sp P02081 HBBF_BOVIN | vVTG<br>VAN<br>ALA<br>HR | 95% | 67.6 | 51.63835 | Ref | 0.2    | 0.096 | -0.03 | -0.091 | -0.26 | 0.23  | -0.21 | 1690  | 1730  | 1750  | 1800  | 1910  | 1480  | 2170  | 1590  | 504.6 | 1510.9 | 3 | 0.0093 | 6.125 |
| Hemoglobin fetal subunit beta<br>OS=Bos taurus PE=1<br>SV=1 | sp P02081 HBBF_BOVIN | vVTG<br>VAN<br>ALA<br>HR | 95% | 65.6 | 52.0744  | Ref | 0.23   | -0.09 | -0.05 | -0.075 | -0.18 | 0.2   | -0.2  | 1660  | 1600  | 1390  | 1610  | 1740  | 1410  | 1920  | 1440  | 504.6 | 1510.9 | 3 | 0.0065 | 4.319 |
| Hemoglobin fetal subunit beta<br>OS=Bos taurus PE=1<br>SV=1 | sp P02081 HBBF_BOVIN | vVTG<br>VAN<br>ALA<br>HR | 95% | 73.6 | 52.06448 | Ref | -0.035 | -0.13 | 0.043 | -0.16  | -0.03 | 0.098 | 0.05  | 563   | 442   | 448   | 568   | 543   | 521   | 593   | 569   | 504.6 | 1510.9 | 3 | 0.007  | 4.617 |



|                                                             |                      |                          |     |      |          |     |       |       |       |        |       |       |       |       |       |       |       |       |       |       |       |       |        |   |        |       |
|-------------------------------------------------------------|----------------------|--------------------------|-----|------|----------|-----|-------|-------|-------|--------|-------|-------|-------|-------|-------|-------|-------|-------|-------|-------|-------|-------|--------|---|--------|-------|
| Hemoglobin fetal subunit beta<br>OS=Bos taurus PE=1<br>SV=1 | sp P02081 HBBF_BOVIN | vVTG<br>VAN<br>ALA<br>HR | 95% | 60.3 | 51.86863 | Ref | -0.24 | 0.32  | -0.07 | 0.035  | -0.29 | -0.12 | 0.096 | 310   | 207   | 331   | 284   | 337   | 235   | 277   | 318   | 504.6 | 1510.9 | 3 | 0.0052 | 3.466 |
| Hemoglobin fetal subunit beta<br>OS=Bos taurus PE=1<br>SV=1 | sp P02081 HBBF_BOVIN | vVTG<br>VAN<br>ALA<br>HR | 95% | 78.4 | 52.11478 | Ref | 0.14  | 0.075 | -0.17 | -0.031 | -0.42 | 0.35  | -0.14 | 6960  | 6510  | 6750  | 6390  | 7760  | 5180  | 9210  | 6500  | 505   | 1511.9 | 3 | 0.013  | 8.605 |
| Hemoglobin fetal subunit beta<br>OS=Bos taurus PE=1<br>SV=1 | sp P02081 HBBF_BOVIN | vVTG<br>VAN<br>ALA<br>HR | 95% | 79.6 | 52.15053 | Ref | 0.11  | 0.22  | -0.35 | 0.05   | -0.25 | 0.38  | -0.26 | 14800 | 14700 | 17100 | 13000 | 18900 | 13500 | 21600 | 13800 | 505   | 1511.9 | 3 | 0.0122 | 8.07  |
| Hemoglobin fetal subunit beta<br>OS=Bos taurus PE=1<br>SV=1 | sp P02081 HBBF_BOVIN | vVTG<br>VAN<br>ALA<br>HR | 91% | 43.1 | 52.16145 | Ref | 0.42  | 0.34  | -0.2  | -0.19  | -0.36 | 0.3   | -0.16 | 4230  | 6900  | 7090  | 5480  | 6070  | 4710  | 7760  | 5590  | 756.9 | 1511.9 | 2 | 0.0107 | 7.088 |
| Hemoglobin fetal subunit beta<br>OS=Bos taurus PE=1<br>SV=1 | sp P02081 HBBF_BOVIN | vVTG<br>VAN<br>ALA<br>HR | 91% | 45.5 | 51.90307 | Ref | 0.24  | -0.12 | -0.05 | -0.057 | -0.15 | 0.35  | -0.12 | 2290  | 2710  | 2300  | 2710  | 2970  | 2430  | 3590  | 2570  | 505   | 1511.9 | 3 | 0.0092 | 6.067 |
| Hemoglobin fetal subunit beta<br>OS=Bos taurus PE=1<br>SV=1 | sp P02081 HBBF_BOVIN | vVTG<br>VAN<br>ALA<br>HR | 95% | 70.7 | 51.98203 | Ref | 0.25  | 0.13  | -0.14 | -0.12  | -0.39 | 0.27  | -0.14 | 2160  | 2250  | 2250  | 2100  | 2340  | 1690  | 2810  | 2100  | 505   | 1511.9 | 3 | 0.0059 | 3.886 |

|                                                         |                        |                                                  |     |      |          |     |        |       |       |       |       |       |       |       |       |       |       |       |       |       |       |       |        |   |        |       |
|---------------------------------------------------------|------------------------|--------------------------------------------------|-----|------|----------|-----|--------|-------|-------|-------|-------|-------|-------|-------|-------|-------|-------|-------|-------|-------|-------|-------|--------|---|--------|-------|
| Uncharacterized protein OS=Bos taurus GN=FLNA PE=4 SV=1 | tr F1N169 F1N169_BOVIN | aFGP<br>GLQ<br>GGG<br>AGS<br>PAR                 | 95% | 52.9 | 52.75682 | Ref | -0.21  | -0    | -0.29 | -0.11 | -0.17 | -0.27 | -0.22 | 3410  | 2450  | 3080  | 2830  | 3540  | 2970  | 2890  | 2970  | 867.5 | 1732.9 | 2 | 0.0107 | 6.176 |
| Uncharacterized protein OS=Bos taurus GN=FLNA PE=4 SV=1 | tr F1N169 F1N169_BOVIN | aGQ<br>SAA<br>GAV<br>LGIG<br>ADT<br>R            | 95% | 76.6 | 53.45642 | Ref | -0.53  | 0.2   | -0.25 | -0.19 | -0.3  | 0.074 | -0.43 | 17600 | 10000 | 18000 | 14900 | 17000 | 13800 | 18600 | 13100 | 910   | 1818   | 2 | 0.005  | 2.738 |
| Uncharacterized protein OS=Bos taurus GN=FLNA PE=4 SV=1 | tr F1N169 F1N169_BOVIN | aHV<br>VPcF<br>DPSK                              | 95% | 55.4 | 53.42476 | Ref | 0.036  | -0.22 | -0.14 | -0.24 | -0.14 | -0.04 | -0.41 | 11100 | 10500 | 9590  | 11400 | 11700 | 11000 | 12200 | 9420  | 618.7 | 1853   | 3 | 0.0121 | 6.517 |
| Uncharacterized protein OS=Bos taurus GN=FLNA PE=4 SV=1 | tr F1N169 F1N169_BOVIN | aLTQ<br>TGG<br>PHVk                              | 77% | 37.2 | 52.05502 | Ref | -0.18  | -0.13 | -0.19 | -0.13 | -0.15 | -0.1  | -0.25 | 50900 | 40700 | 45400 | 48900 | 56200 | 48500 | 52500 | 47100 | 573   | 1716   | 3 | 0.0122 | 7.132 |
| Uncharacterized protein OS=Bos taurus GN=FLNA PE=4 SV=1 | tr F1N169 F1N169_BOVIN | aLTQ<br>TGG<br>PHVk                              | 88% | 42.7 | 52.05061 | Ref | -0.16  | -0.08 | -0.27 | -0.04 | -0.1  | -0.24 | -0.3  | 69800 | 55300 | 63100 | 62400 | 80500 | 67300 | 63800 | 60900 | 573   | 1716   | 3 | 0.0141 | 8.198 |
| Uncharacterized protein OS=Bos taurus GN=FLNA PE=4 SV=1 | tr F1N169 F1N169_BOVIN | aSGP<br>GLN<br>TTG<br>VPAS<br>LPVE<br>FTID<br>Ak | 95% | 56.3 | 54.86772 | Ref | -6E-04 | -0.22 | -0.24 | -0.12 | 0.097 | -0    | -0.63 | 2360  | 2310  | 2150  | 2380  | 2850  | 2900  | 2820  | 1810  | 984.2 | 2949.6 | 3 | 0.0213 | 7.216 |

|                                                         |                        |                                                  |     |      |          |     |       |       |       |        |       |       |       |       |       |       |       |       |       |       |       |       |        |   |        |       |
|---------------------------------------------------------|------------------------|--------------------------------------------------|-----|------|----------|-----|-------|-------|-------|--------|-------|-------|-------|-------|-------|-------|-------|-------|-------|-------|-------|-------|--------|---|--------|-------|
| Uncharacterized protein OS=Bos taurus GN=FLNA PE=4 SV=1 | tr F1N169 F1N169_BOVIN | aSGP<br>GLN<br>TTG<br>VPAS<br>LPVE<br>FTID<br>Ak | 95% | 55.1 | 54.44304 | Ref | -0.37 | -0.09 | -0.07 | -0.16  | -0.24 | -0.28 | -0.18 | 2880  | 1740  | 2300  | 2620  | 2710  | 2240  | 2270  | 2420  | 984.2 | 2949.6 | 3 | 0.0077 | 2.62  |
| Uncharacterized protein OS=Bos taurus GN=FLNA PE=4 SV=1 | tr F1N169 F1N169_BOVIN | dAG<br>EGG<br>LSLAI<br>EGPS<br>k                 | 89% | 45.3 | 54.09065 | Ref | -0.13 | -0.01 | -0.23 | -0.16  | -0.44 | -0.1  | -0.41 | 17700 | 12300 | 14500 | 14000 | 16200 | 11700 | 15400 | 12300 | 703.7 | 2108.1 | 3 | 0.0243 | 11.52 |
| Uncharacterized protein OS=Bos taurus GN=FLNA PE=4 SV=1 | tr F1N169 F1N169_BOVIN | dAG<br>EGLL<br>AVQI<br>TDPE<br>GkPk              | 95% | 55.5 | 53.44032 | Ref | -0.25 | -0.03 | -0.32 | -0.12  | -0.31 | -0.01 | -0.34 | 7790  | 5260  | 6670  | 6120  | 7740  | 5940  | 7600  | 6010  | 950.9 | 2849.6 | 3 | 0.0279 | 9.778 |
| Uncharacterized protein OS=Bos taurus GN=FLNA PE=4 SV=1 | tr F1N169 F1N169_BOVIN | dAP<br>QDF<br>HPD<br>R                           | 95% | 51.2 | 49.29025 | Ref | -0.47 | 0.6   | -0.49 | -0.1   | -0.32 | -0.07 | -0.33 | 42800 | 34100 | 77500 | 41000 | 58900 | 44300 | 55000 | 45500 | 501.2 | 1500.7 | 3 | 0.0115 | 7.686 |
| Uncharacterized protein OS=Bos taurus GN=FLNA PE=4 SV=1 | tr F1N169 F1N169_BOVIN | eAG<br>AGG<br>LAIA<br>VEG<br>PSk                 | 95% | 80.6 | 53.28781 | Ref | -0.21 | 0.024 | -0.24 | -0.073 | -0.41 | -0.11 | -0.56 | 5900  | 3720  | 4760  | 4440  | 5500  | 3810  | 4900  | 3550  | 1018  | 2034.1 | 2 | 0.0159 | 7.788 |
| Uncharacterized protein OS=Bos taurus GN=FLNA PE=4 SV=1 | tr F1N169 F1N169_BOVIN | eATT<br>EFSV<br>DAR                              | 86% | 38.2 | 50.65565 | Ref | 0.046 | -0.03 | -0.18 | -0.18  | -0.42 | -0.11 | -0.35 | 36200 | 32900 | 33900 | 34400 | 37700 | 27900 | 36100 | 30400 | 765.4 | 1528.8 | 2 | 0.0135 | 8.839 |

|                                                         |                        |                                                 |     |      |          |     |        |       |       |        |       |       |       |       |       |       |       |       |      |       |       |       |        |   |        |       |
|---------------------------------------------------------|------------------------|-------------------------------------------------|-----|------|----------|-----|--------|-------|-------|--------|-------|-------|-------|-------|-------|-------|-------|-------|------|-------|-------|-------|--------|---|--------|-------|
| Uncharacterized protein OS=Bos taurus GN=FLNA PE=4 SV=1 | tr F1N169 F1N169_BOVIN | eGPY<br>SISV<br>LYGD<br>EEVPR                   | 88% | 44.6 | 53.77803 | Ref | 0.12   | -0.21 | -0.3  | -0.25  | -0.31 | -0.28 | -0.24 | 4630  | 3810  | 3290  | 3490  | 3970  | 3320 | 3540  | 3620  | 738.7 | 2213.1 | 3 | 0.0041 | 1.873 |
| Uncharacterized protein OS=Bos taurus GN=FLNA PE=4 SV=1 | tr F1N169 F1N169_BOVIN | enGL<br>YLID<br>Vk                              | 51% | 32.2 | 52.61196 | Ref | 0.4    | -0.68 | -0.52 | -0.6   | -0.99 | -0.56 | -0.74 | 32300 | 17300 | 8890  | 11100 | 11600 | 7750 | 10900 | 9510  | 591.7 | 1772   | 3 | 0.0106 | 5.955 |
| Uncharacterized protein OS=Bos taurus GN=FLNA PE=4 SV=1 | tr F1N169 F1N169_BOVIN | fNEE<br>HIPD<br>SPFV<br>VPV<br>ASPS<br>GDA<br>R | 95% | 55.8 | 54.72347 | Ref | 0.13   | 0.5   | -0.35 | -0.26  | -0.48 | -0.2  | -0.68 | 1650  | 1770  | 2490  | 1540  | 1810  | 1370 | 1720  | 1230  | 924.5 | 2770.4 | 3 | 0.0085 | 3.054 |
| Uncharacterized protein OS=Bos taurus GN=FLNA PE=4 SV=1 | tr F1N169 F1N169_BOVIN | gAG<br>TGG<br>LGLA<br>VEG<br>PSEA<br>k          | 95% | 62.3 | 54.20746 | Ref | -0.37  | 0.054 | -0.27 | 0.18   | -0.31 | -0.21 | -0.43 | 5400  | 3470  | 5070  | 4540  | 6850  | 4250 | 4760  | 4050  | 1090  | 2178.2 | 2 | 0.0215 | 9.846 |
| Uncharacterized protein OS=Bos taurus GN=FLNA PE=4 SV=1 | tr F1N169 F1N169_BOVIN | gQH<br>VPG<br>SPFQ<br>FTVG<br>PLGE<br>GGA<br>Hk | 77% | 38.8 | 55.44592 | Ref | -0.024 | -0.2  | -0.24 | -0.12  | -0.22 | -0.15 | -0.27 | 2940  | 2480  | 2370  | 2590  | 3100  | 2540 | 2770  | 2530  | 728.9 | 2911.5 | 4 | 0.0136 | 4.656 |
| Uncharacterized protein OS=Bos taurus GN=FLNA PE=4 SV=1 | tr F1N169 F1N169_BOVIN | iVGP<br>SGA<br>AVPc<br>k                        | 76% | 37.9 | 52.88746 | Ref | 0.2    | -0.01 | -0.23 | -0.062 | -0.7  | -0.26 | -0.18 | 12800 | 13800 | 12900 | 12400 | 15400 | 8610 | 12200 | 12800 | 585   | 1752   | 3 | 0.0112 | 6.394 |

|                                                         |                        |                    |     |      |          |     |        |       |       |       |       |       |       |       |      |       |       |       |      |       |      |       |        |   |        |       |
|---------------------------------------------------------|------------------------|--------------------|-----|------|----------|-----|--------|-------|-------|-------|-------|-------|-------|-------|------|-------|-------|-------|------|-------|------|-------|--------|---|--------|-------|
| Uncharacterized protein OS=Bos taurus GN=FLNA PE=4 SV=1 | tr F1N169 F1N169_BOVIN | IIALL EVLS Qk      | 95% | 47.5 | 45.52084 | Ref | 0.22   | -0.34 | -0.33 | -0.2  | -0.26 | -0    | -0.74 | 366   | 317  | 233   | 262   | 316   | 266  | 331   | 197  | 612.4 | 1834.2 | 3 | 0.0075 | 4.079 |
| Uncharacterized protein OS=Bos taurus GN=FLNA PE=4 SV=1 | tr F1N169 F1N169_BOVIN | IIALL EVLS Qk      | 75% | 30.1 | 45.52206 | Ref | 0.13   | -0.04 | -0.04 | -0.43 | -0.53 | -0.46 | -0.37 | 180   | 137  | 132   | 148   | 124   | 101  | 111   | 118  | 612.4 | 1834.2 | 3 | 0.0082 | 4.487 |
| Uncharacterized protein OS=Bos taurus GN=FLNA PE=4 SV=1 | tr F1N169 F1N169_BOVIN | IYSV SYLL k        | 91% | 43   | 50.24502 | Ref | -0.016 | -0.28 | -0.17 | -0.2  | -0.5  | 0.24  | -0.42 | 5030  | 4260 | 3830  | 4660  | 5010  | 3570 | 6240  | 3890 | 565.3 | 1693   | 3 | 0.0103 | 6.054 |
| Uncharacterized protein OS=Bos taurus GN=FLNA PE=4 SV=1 | tr F1N169 F1N169_BOVIN | rLTV SSLQ ESGL k   | 66% | 33.7 | 51.32692 | Ref | -0.14  | -0.04 | -0.11 | -0.12 | -0.28 | 0.039 | -0.44 | 9610  | 8370 | 9690  | 10400 | 11400 | 8880 | 11600 | 8240 | 676.1 | 2025.2 | 3 | 0.017  | 8.373 |
| Uncharacterized protein OS=Bos taurus GN=FLNA PE=4 SV=1 | tr F1N169 F1N169_BOVIN | sPFS VGV SPSP DLSk | 95% | 53.5 | 53.51976 | Ref | -0.31  | -0.05 | -0.11 | -0.17 | -0.36 | -0.04 | -0.34 | 12200 | 7800 | 10200 | 10900 | 11600 | 8850 | 11600 | 9330 | 710.1 | 2127.2 | 3 | 0.0158 | 7.444 |
| Uncharacterized protein OS=Bos taurus GN=FLNA PE=4 SV=1 | tr F1N169 F1N169_BOVIN | sPFS VGV SPSP DLSk | 86% | 42.5 | 53.40361 | Ref | 0.034  | -0.19 | -0.26 | -0.24 | -0.08 | -0.16 | -0.17 | 5070  | 4970 | 4610  | 4940  | 5520  | 5390 | 5330  | 5230 | 710.1 | 2127.2 | 3 | 0.0098 | 4.611 |

|                                                         |                        |                     |     |      |          |     |        |       |       |        |       |       |       |       |      |      |      |      |      |      |      |       |        |   |        |       |
|---------------------------------------------------------|------------------------|---------------------|-----|------|----------|-----|--------|-------|-------|--------|-------|-------|-------|-------|------|------|------|------|------|------|------|-------|--------|---|--------|-------|
| Uncharacterized protein OS=Bos taurus GN=FLNA PE=4 SV=1 | tr F1N169 F1N169_BOVIN | sPFS VGV SPSL DLSK  | 90% | 45.2 | 53.29536 | Ref | -0.32  | -0.12 | -0.29 | -0.34  | -0.23 | -0.25 | -0.36 | 12100 | 5920 | 7390 | 7370 | 7870 | 7380 | 7600 | 7010 | 710.1 | 2127.2 | 3 | 0.0067 | 3.145 |
| Uncharacterized protein OS=Bos taurus GN=FLNA PE=4 SV=1 | tr F1N169 F1N169_BOVIN | sPFS VGV SPSL DLSK  | 90% | 45.8 | 53.52422 | Ref | 0.42   | 0.058 | -0.32 | -0.33  | -0.37 | -0.32 | -0.35 | 4460  | 5840 | 4940 | 4270 | 4660 | 3970 | 4290 | 4180 | 710.1 | 2127.2 | 3 | 0.0155 | 7.275 |
| Uncharacterized protein OS=Bos taurus GN=FLNA PE=4 SV=1 | tr F1N169 F1N169_BOVIN | sPFS VGV SPSL DLSK  | 79% | 39.6 | 53.65355 | Ref | 0.038  | -0.19 | -0.1  | -0.32  | -0.38 | -0.15 | -0.19 | 1300  | 1120 | 1040 | 1240 | 1170 | 980  | 1210 | 1160 | 710.1 | 2127.2 | 3 | 0.0212 | 9.94  |
| Uncharacterized protein OS=Bos taurus GN=FLNA PE=4 SV=1 | tr F1N169 F1N169_BOVIN | tFSV WYV PEVT GTH k | 95% | 55.1 | 54.59512 | Ref | 0.19   | -0.02 | -0.4  | -0.2   | -0.21 | -0.08 | -0.65 | 717   | 695  | 651  | 565  | 714  | 617  | 709  | 472  | 787.1 | 2358.3 | 3 | 0.0173 | 7.313 |
| Uncharacterized protein OS=Bos taurus GN=FLNA PE=4 SV=1 | tr F1N169 F1N169_BOVIN | tFSV WYV PEVT GTH k | 94% | 51.1 | 54.57061 | Ref | -0.068 | -0.23 | -0.1  | -0.069 | -0.37 | -0.07 | -0.28 | 834   | 708  | 689  | 842  | 949  | 675  | 863  | 742  | 787.1 | 2358.3 | 3 | 0.0114 | 4.833 |
| Uncharacterized protein OS=Bos taurus GN=FLNA PE=4 SV=1 | tr F1N169 F1N169_BOVIN | vNV GAG SHP Nk      | 72% | 35.8 | 52.61971 | Ref | -0.17  | 0.016 | -0.16 | -0.18  | -0.21 | -0.24 | -0.4  | 4830  | 3480 | 4290 | 4260 | 4620 | 3970 | 4070 | 3600 | 844.5 | 1687   | 2 | 0.0123 | 7.293 |

|                                                         |                        |                                                |     |      |          |     |       |       |       |        |       |       |       |       |       |       |       |       |       |       |       |       |        |   |        |       |
|---------------------------------------------------------|------------------------|------------------------------------------------|-----|------|----------|-----|-------|-------|-------|--------|-------|-------|-------|-------|-------|-------|-------|-------|-------|-------|-------|-------|--------|---|--------|-------|
| Uncharacterized protein OS=Bos taurus GN=FLNA PE=4 SV=1 | tr F1N169 F1N169_BOVIN | vNV<br>GAG<br>SHP<br>Nk                        | 77% | 37.7 | 52.44445 | Ref | -0.11 | 0.065 | -0.29 | -0.11  | -0.28 | -0.21 | -0.25 | 19200 | 15900 | 19500 | 17200 | 21400 | 16600 | 18200 | 17600 | 563.3 | 1687   | 3 | #####  | 0.43  |
| Uncharacterized protein OS=Bos taurus GN=FLNA PE=4 SV=1 | tr F1N169 F1N169_BOVIN | vPVH<br>DVT<br>DASK                            | 61% | 34.4 | 53.2462  | Ref | 0.24  | 0.31  | -0.34 | -0.15  | -0.37 | -0.43 | -0.57 | 38400 | 42900 | 49200 | 35100 | 44100 | 33100 | 33100 | 29800 | 592.7 | 1775   | 3 | 0.0129 | 7.278 |
| Uncharacterized protein OS=Bos taurus GN=FLNA PE=4 SV=1 | tr F1N169 F1N169_BOVIN | vSG<br>QGL<br>HEG<br>HTFE<br>PAEF<br>IIDT<br>R | 91% | 46   | 54.93943 | Ref | 0.033 | 0.044 | -0.16 | -0.3   | -0.3  | -0.11 | -0.15 | 1550  | 1680  | 1840  | 1800  | 1800  | 1560  | 1860  | 1800  | 686.9 | 2743.4 | 4 | 0.0133 | 4.849 |
| Uncharacterized protein OS=Bos taurus GN=FLNA PE=4 SV=1 | tr F1N169 F1N169_BOVIN | vTVL<br>FAG<br>QHIA<br>k                       | 95% | 63.8 | 49.66076 | Ref | 0.037 | -0.27 | -0.16 | -0.12  | -0.45 | 0.011 | -0.39 | 1210  | 1020  | 894   | 1080  | 1230  | 854   | 1230  | 923   | 946.6 | 1891.1 | 2 | 0.0085 | 4.501 |
| Uncharacterized protein OS=Bos taurus GN=FLNA PE=4 SV=1 | tr F1N169 F1N169_BOVIN | vTYT<br>PMA<br>PGSY<br>LISik                   | 69% | 36.9 | 53.8133  | Ref | 0.22  | -0.06 | -0.31 | -0.034 | -0.44 | -0.28 | 0.013 | 895   | 1220  | 1090  | 1030  | 1370  | 906   | 1050  | 1280  | 783.8 | 2348.3 | 3 | 0.0175 | 7.456 |
| Uncharacterized protein OS=Bos taurus GN=FLNA PE=4 SV=1 | tr F1N169 F1N169_BOVIN | yGG<br>DEIP<br>FSPY<br>R                       | 91% | 42.3 | 51.50968 | Ref | -0.12 | -0.05 | -0.22 | -0.1   | -0.27 | -0.14 | -0.26 | 6100  | 5070  | 5780  | 5740  | 6880  | 5340  | 6090  | 5590  | 852.9 | 1703.8 | 2 | 0.0044 | 2.566 |

|                                                                                |                                                |                                                |     |      |          |     |        |       |       |        |       |       |       |      |      |      |      |       |      |       |       |       |        |   |        |       |
|--------------------------------------------------------------------------------|------------------------------------------------|------------------------------------------------|-----|------|----------|-----|--------|-------|-------|--------|-------|-------|-------|------|------|------|------|-------|------|-------|-------|-------|--------|---|--------|-------|
| Uncharacterized protein OS=Bos taurus GN=FLNA PE=4 SV=1                        | tr F1N169 F1N169_BOVIN                         | yGG<br>DEIP<br>FSPY<br>R                       | 61% | 32.4 | 51.55224 | Ref | -0.19  | 0.009 | -0.28 | -0.1   | -0.28 | -0.02 | -0.26 | 3440 | 2790 | 3480 | 3200 | 3990  | 3070 | 3840  | 3240  | 852.9 | 1703.8 | 2 | 0.0018 | 1.065 |
| Uncharacterized protein OS=Bos taurus GN=FLNA PE=4 SV=1                        | tr F1N169 F1N169_BOVIN                         | yGG<br>PYHI<br>AGS<br>Pfk                      | 53% | 33.8 | 53.93145 | Ref | 0.026  | -0.13 | -0.32 | -0.13  | -0.24 | -0.05 | -0.11 | 9310 | 9910 | 9670 | 9480 | 11900 | 9630 | 11500 | 10900 | 668   | 2001.1 | 3 | 0.0175 | 8.748 |
| Uncharacterized protein OS=Bos taurus GN=FLNA PE=4 SV=1                        | tr F1N169 F1N169_BOVIN                         | yTPV<br>QQG<br>PVGI<br>NVT<br>YGG<br>DAIP<br>k | 95% | 58.8 | 54.98977 | Ref | -0.095 | -0.05 | -0.14 | -0.22  | -0.06 | -0.29 | -0.19 | 2080 | 1900 | 2130 | 2230 | 2340  | 2280 | 2030  | 2160  | 961.5 | 2881.6 | 3 | 0.027  | 9.35  |
| Uncharacterized protein OS=Bos taurus GN=FLNA PE=4 SV=1                        | tr F1N169 F1N169_BOVIN                         | yTPV<br>QQG<br>PVGI<br>NVT<br>YGG<br>DAIP<br>k | 80% | 41.3 | 54.89337 | Ref | 0.15   | -0.44 | -0.24 | -0.12  | 0.14  | -0.35 | -0.55 | 1140 | 1070 | 772  | 994  | 1190  | 1240 | 924   | 801   | 961.5 | 2881.6 | 3 | 0.0209 | 7.258 |
| Protein disulfide isomerase family A member 3 OS=Ovis aries GN=PDIA3 PE=2 SV=1 | tr C6JUQ0 C6JUQ0_SHEEP, tr D3K382 D3K382_CAPHI | aQE<br>DL                                      | 64% | 30   | 48.44701 | Ref | -0.11  | -0.16 | 0.003 | -0.074 | 0.28  | -0.32 | 0.063 | 776  | 603  | 633  | 796  | 832   | 931  | 639   | 828   | 440.2 | 878.46 | 2 | 0.0048 | 5.452 |



|                                                                                |                                            |                          |     |      |          |     |      |       |       |        |       |       |       |       |       |       |       |       |       |       |       |       |        |   |        |       |
|--------------------------------------------------------------------------------|--------------------------------------------|--------------------------|-----|------|----------|-----|------|-------|-------|--------|-------|-------|-------|-------|-------|-------|-------|-------|-------|-------|-------|-------|--------|---|--------|-------|
| Protein disulfide isomerase family A member 3 OS=Ovis aries GN=PDIA3 PE=2 SV=1 | tr C6JUQ0 C6JUQ0_SHEEP, tr D3K382 D3K382_C | aQE<br>DL                | 60% | 29.3 | 48.56644 | Ref | 0.14 | -0.21 | -0.17 | -0.082 | 0.045 | -0.09 | -0.09 | 5330  | 4410  | 3750  | 4330  | 5070  | 4830  | 4600  | 4550  | 440.2 | 878.46 | 2 | 0.0056 | 6.362 |
| Protein disulfide isomerase family A member 3 OS=Ovis aries GN=PDIA3 PE=2 SV=1 | tr C6JUQ0 C6JUQ0_SHEEP, tr D3K382 D3K382_C | dGEE<br>SGA<br>YDG<br>PR | 92% | 38.5 | 46.89211 | Ref | 0.37 | 0.17  | -0.02 | -0.16  | -0.13 | -0.38 | -0.32 | 13100 | 13600 | 12900 | 12700 | 12600 | 11300 | 9930  | 10300 | 778.9 | 1555.7 | 2 | 0.0099 | 6.33  |
| Protein disulfide isomerase family A member 3 OS=Ovis aries GN=PDIA3 PE=2 SV=1 | tr C6JUQ0 C6JUQ0_SHEEP, tr D3K382 D3K382_C | dLFS<br>EAHS<br>EFLK     | 87% | 44   | 54.20421 | Ref | 0.25 | -0.35 | 0.16  | -0.068 | 0.085 | -0.2  | -0.21 | 63400 | 64300 | 46100 | 73500 | 69100 | 67100 | 57600 | 56500 | 677.7 | 2030.1 | 3 | 0.018  | 8.854 |
| Protein disulfide isomerase family A member 3 OS=Ovis aries GN=PDIA3 PE=2 SV=1 | tr C6JUQ0 C6JUQ0_SHEEP, tr D3K382 D3K382_C | dLFS<br>EAHS<br>EFLK     | 95% | 63.5 | 54.20972 | Ref | 0.18 | -0.2  | -0.03 | -0.075 | 0.14  | -0.2  | -0.11 | 2090  | 2020  | 1680  | 2120  | 2260  | 2300  | 1890  | 2000  | 1016  | 2030.1 | 2 | 0.0168 | 8.285 |

|                                                                                |                                            |              |     |     |      |          |     |       |       |       |       |       |       |       |      |      |      |      |      |      |      |      |       |        |   |        |       |
|--------------------------------------------------------------------------------|--------------------------------------------|--------------|-----|-----|------|----------|-----|-------|-------|-------|-------|-------|-------|-------|------|------|------|------|------|------|------|------|-------|--------|---|--------|-------|
| Protein disulfide isomerase family A member 3 OS=Ovis aries GN=PDIA3 PE=2 SV=1 | tr C6JUQ0 C6JUQ0_SHEEP, tr D3K382 D3K382_C | dLLI AYY DVD | YEk | 95% | 62.2 | 54.60251 | Ref | 0.081 | -0.2  | 0.12  | -0.14 | 0.11  | 0.023 | -0.09 | 1130 | 1140 | 1010 | 1420 | 1310 | 1360 | 1340 | 1230 | 743.4 | 2227.2 | 3 | 0.0122 | 5.498 |
| Protein disulfide isomerase family A member 3 OS=Ovis aries GN=PDIA3 PE=2 SV=1 | tr C6JUQ0 C6JUQ0_SHEEP, tr D3K382 D3K382_C | dLLI AYY DVD | YEk | 95% | 65.2 | 54.55527 | Ref | 0.14  | -0.29 | 0.077 | -0.25 | 0.073 | 0.075 | -0.08 | 2360 | 2260 | 1830 | 2640 | 2320 | 2530 | 2650 | 2350 | 743.4 | 2227.2 | 3 | 0.0141 | 6.319 |
| Protein disulfide isomerase family A member 3 OS=Ovis aries GN=PDIA3 PE=2 SV=1 | tr C6JUQ0 C6JUQ0_SHEEP, tr D3K382 D3K382_C | dLLI AYY DVD | YEk | 94% | 52.2 | 54.59309 | Ref | 0.38  | -0.3  | 0.14  | -0.31 | -0.03 | -0.03 | -0.09 | 668  | 801  | 541  | 825  | 665  | 708  | 740  | 700  | 743.4 | 2227.2 | 3 | 0.0106 | 4.757 |
| Protein disulfide isomerase family A member 3 OS=Ovis aries GN=PDIA3 PE=2 SV=1 | tr C6JUQ0 C6JUQ0_SHEEP, tr D3K382 D3K382_C | dLLI AYY DVD | YEk | 95% | 55.3 | 54.5719  | Ref | 0.27  | -0.05 | -0.11 | -0.26 | 0.25  | -0.1  | -0.01 | 404  | 508  | 441  | 476  | 473  | 587  | 482  | 508  | 743.4 | 2227.2 | 3 | 0.0077 | 3.451 |

|                                                                                |                                                |                   |     |      |          |     |        |       |       |        |       |       |       |       |       |       |       |       |       |       |      |       |        |   |        |       |
|--------------------------------------------------------------------------------|------------------------------------------------|-------------------|-----|------|----------|-----|--------|-------|-------|--------|-------|-------|-------|-------|-------|-------|-------|-------|-------|-------|------|-------|--------|---|--------|-------|
| Protein disulfide isomerase family A member 3 OS=Ovis aries GN=PDIA3 PE=2 SV=1 | tr C6JUQ0 C6JUQ0_SHEEP, tr D3K382 D3K382_C API | dLLI AYY DVD YEK  | 66% | 36.9 | 54.58197 | Ref | 0.072  | 0.031 | 0.11  | -0.021 | 0.26  | -0.24 | -0.41 | 369   | 361   | 381   | 451   | 454   | 481   | 356   | 315  | 743.4 | 2227.2 | 3 | 0.0165 | 7.396 |
| Protein disulfide isomerase family A member 3 OS=Ovis aries GN=PDIA3 PE=2 SV=1 | tr C6JUQ0 C6JUQ0_SHEEP, tr D3K382 D3K382_C API | dPNI VIAK         | 51% | 29   | 49.48604 | Ref | 0.18   | 0.043 | 0.12  | -0.36  | 0.15  | 0.031 | -0.35 | 10200 | 10800 | 10700 | 12700 | 9990  | 12500 | 12000 | 9130 | 493.3 | 1476.9 | 3 | 0.0243 | 16.42 |
| Protein disulfide isomerase family A member 3 OS=Ovis aries GN=PDIA3 PE=2 SV=1 | tr C6JUQ0 C6JUQ0_SHEEP, tr D3K382 D3K382_C API | eAT NPP VIQE EkPk | 81% | 39.1 | 52.98945 | Ref | -0.16  | -0.01 | 0.14  | -0.018 | 0.28  | -0.41 | -0.15 | 9550  | 7290  | 8780  | 10900 | 10800 | 11600 | 7520  | 8910 | 831.5 | 2491.4 | 3 | 0.0178 | 7.126 |
| Protein disulfide isomerase family A member 3 OS=Ovis aries GN=PDIA3 PE=2 SV=1 | tr C6JUQ0 C6JUQ0_SHEEP, tr D3K382 D3K382_C API | eLSD FISYL k      | 70% | 36.1 | 52.98945 | Ref | -0.099 | 0.01  | -0.01 | -0.079 | 0.007 | -0.04 | 0.098 | 1150  | 996   | 1170  | 1290  | 1360  | 1260  | 1270  | 1390 | 608.3 | 1822   | 3 | 0.0131 | 7.199 |

|                                                                                |                                            |               |     |      |          |     |        |       |       |        |       |       |       |       |       |       |       |       |       |       |       |       |        |   |        |       |
|--------------------------------------------------------------------------------|--------------------------------------------|---------------|-----|------|----------|-----|--------|-------|-------|--------|-------|-------|-------|-------|-------|-------|-------|-------|-------|-------|-------|-------|--------|---|--------|-------|
| Protein disulfide isomerase family A member 3 OS=Ovis aries GN=PDIA3 PE=2 SV=1 | tr C6JUQ0 C6JUQ0_SHEEP, tr D3K382 D3K382_C | eLSD FISYL    | 90% | 44.7 | 52.98925 | Ref | -0.2   | -0.04 | 0.014 | 0.12   | 0.009 | 0.047 | -0.12 | 924   | 720   | 874   | 1020  | 1210  | 976   | 1050  | 925   | 608.3 | 1822   | 3 | 0.0111 | 6.08  |
| Protein disulfide isomerase family A member 3 OS=Ovis aries GN=PDIA3 PE=2 SV=1 | tr C6JUQ0 C6JUQ0_SHEEP, tr D3K382 D3K382_C | fLED YFD GNlk | 94% | 50.7 | 53.83518 | Ref | 0.18   | -0.22 | -0.06 | -0.15  | -0    | -0.15 | 0.11  | 6280  | 5980  | 4930  | 6190  | 6410  | 6180  | 5840  | 6940  | 657   | 1968   | 3 | 0.0123 | 6.258 |
| Protein disulfide isomerase family A member 3 OS=Ovis aries GN=PDIA3 PE=2 SV=1 | tr C6JUQ0 C6JUQ0_SHEEP, tr D3K382 D3K382_C | gFPT IYFS PAN | 58% | 34.6 | 53.92202 | Ref | -0.075 | -0.24 | 0.086 | -0.16  | 0.2   | -0.23 | 0.097 | 527   | 420   | 406   | 571   | 533   | 597   | 463   | 574   | 650.7 | 1949.1 | 3 | 0.0211 | 10.83 |
| Protein disulfide isomerase family A member 3 OS=Ovis aries GN=PDIA3 PE=2 SV=1 | tr C6JUQ0 C6JUQ0_SHEEP, tr D3K382 D3K382_C | gFPT IYFS PAN | 91% | 46.7 | 53.91743 | Ref | -0.23  | -0.19 | -0.02 | -0.021 | 0.15  | -0.34 | 0.32  | 20200 | 14800 | 16400 | 20900 | 22900 | 22500 | 16800 | 26300 | 650.7 | 1949.1 | 3 | 0.0209 | 10.74 |

|                                                                                |                                            |                |     |      |          |     |       |       |       |        |       |       |       |       |       |       |       |       |       |       |       |       |        |   |        |       |
|--------------------------------------------------------------------------------|--------------------------------------------|----------------|-----|------|----------|-----|-------|-------|-------|--------|-------|-------|-------|-------|-------|-------|-------|-------|-------|-------|-------|-------|--------|---|--------|-------|
| Protein disulfide isomerase family A member 3 OS=Ovis aries GN=PDIA3 PE=2 SV=1 | tr C6JUQ0 C6JUQ0_SHEEP, tr D3K382 D3K382_C | gFPT IYFS PAN  | 93% | 46.1 | 53.57588 | Ref | 0.16  | -0.06 | 0.1   | -0.11  | 0.15  | -0.42 | -0.08 | 4530  | 4450  | 4160  | 5220  | 4950  | 5200  | 3660  | 4600  | 975.5 | 1949.1 | 2 | 0.0106 | 5.437 |
| Protein disulfide isomerase family A member 3 OS=Ovis aries GN=PDIA3 PE=2 SV=1 | tr C6JUQ0 C6JUQ0_SHEEP, tr D3K382 D3K382_C | gFPT IYFS PAN  | 89% | 43.2 | 53.60177 | Ref | 0.049 | -0.09 | 0.14  | -0.14  | 0.11  | -0.21 | -0.07 | 7470  | 6770  | 6670  | 8770  | 7960  | 8250  | 6920  | 7600  | 975.5 | 1949.1 | 2 | 0.0127 | 6.493 |
| Protein disulfide isomerase family A member 3 OS=Ovis aries GN=PDIA3 PE=2 SV=1 | tr C6JUQ0 C6JUQ0_SHEEP, tr D3K382 D3K382_C | gFPT IYFS PAnk | 83% | 40.1 | 52.71223 | Ref | -0.18 | -0.13 | 0.1   | -0.033 | 0.19  | -0.39 | 0.078 | 4180  | 3030  | 3410  | 4490  | 4500  | 4570  | 3220  | 4400  | 795.1 | 2382.4 | 3 | 0.0108 | 4.532 |
| Protein disulfide isomerase family A member 3 OS=Ovis aries GN=PDIA3 PE=2 SV=1 | tr C6JUQ0 C6JUQ0_SHEEP, tr D3K382 D3K382_C | gIVP LAK       | 66% | 23.6 | 41.344   | Ref | 0.022 | -0.21 | 0.072 | -0.071 | 0.003 | -0.22 | -0.08 | 47300 | 35500 | 32900 | 44800 | 44700 | 41100 | 36700 | 40400 | 436   | 1304.9 | 3 | 0.0064 | 4.876 |

|                                                                                |                                            |                        |     |      |          |     |       |       |       |       |       |       |       |       |       |       |       |       |       |       |       |       |        |   |        |       |
|--------------------------------------------------------------------------------|--------------------------------------------|------------------------|-----|------|----------|-----|-------|-------|-------|-------|-------|-------|-------|-------|-------|-------|-------|-------|-------|-------|-------|-------|--------|---|--------|-------|
| Protein disulfide isomerase family A member 3 OS=Ovis aries GN=PDIA3 PE=2 SV=1 | tr C6JUQ0 C6JUQ0_SHEEP, tr D3K382 D3K382_C | gIVP LAK               | 56% | 21.4 | 41.344   | Ref | 0.068 | -0.1  | 0.002 | 0.065 | -0.03 | -0.24 | -0.15 | 86100 | 70400 | 68000 | 81900 | 94300 | 77100 | 69500 | 73400 | 653.4 | 1304.9 | 2 | 0.0049 | 3.723 |
| Protein disulfide isomerase family A member 3 OS=Ovis aries GN=PDIA3 PE=2 SV=1 | tr C6JUQ0 C6JUQ0_SHEEP, tr D3K382 D3K382_C | kDP NIVI AK            | 71% | 26.6 | 43.72009 | Ref | -0.13 | -0.08 | 0.046 | -0.12 | 0.22  | -0.23 | -0.1  | 5980  | 4260  | 4780  | 5870  | 5750  | 6360  | 4870  | 5310  | 955.6 | 1909.2 | 2 | 0.0012 | 0.651 |
| Protein disulfide isomerase family A member 3 OS=Ovis aries GN=PDIA3 PE=2 SV=1 | tr C6JUQ0 C6JUQ0_SHEEP, tr D3K382 D3K382_C | kQA GPA SVPL k         | 67% | 28.6 | 46.16958 | Ref | 0.16  | -0.05 | -0.01 | -0.21 | 0.037 | -0.1  | 0.042 | 10500 | 10800 | 10100 | 11600 | 11200 | 11600 | 11000 | 12100 | 670.1 | 2007.3 | 3 | 0.0024 | 1.173 |
| Protein disulfide isomerase family A member 3 OS=Ovis aries GN=PDIA3 PE=2 SV=1 | tr C6JUQ0 C6JUQ0_SHEEP, tr D3K382 D3K382_C | kQA GPA SVPL kSEE EFEK | 76% | 35   | 52.00941 | Ref | -0.18 | -0.07 | 0.22  | 0.076 | 0.11  | -0.24 | -0.04 | 5020  | 4210  | 4920  | 6750  | 6740  | 6040  | 4930  | 5620  | 798.5 | 3189.8 | 4 | 0.0136 | 4.252 |

|                                                                                |                                            |                 |     |      |          |     |       |       |       |        |       |       |       |       |       |       |       |       |       |       |       |       |        |   |        |       |
|--------------------------------------------------------------------------------|--------------------------------------------|-----------------|-----|------|----------|-----|-------|-------|-------|--------|-------|-------|-------|-------|-------|-------|-------|-------|-------|-------|-------|-------|--------|---|--------|-------|
| Protein disulfide isomerase family A member 3 OS=Ovis aries GN=PDIA3 PE=2 SV=1 | tr C6JUQ0 C6JUQ0_SHEEP, tr D3K382 D3K382_C | IHFAS           | 55% | 30.1 | 50.03254 | Ref | 0.36  | 0.047 | 0.013 | -0.28  | -0.32 | -0.32 | -0.03 | 5580  | 5490  | 4780  | 5240  | 4710  | 3990  | 4180  | 5080  | 402.2 | 1203.7 | 3 | 0.0108 | 8.951 |
| Protein disulfide isomerase family A member 3 OS=Ovis aries GN=PDIA3 PE=2 SV=1 | tr C6JUQ0 C6JUQ0_SHEEP, tr D3K382 D3K382_C | mDATAN DVP SPYE | 95% | 51.9 | 51.34333 | Ref | -0.27 | -0.07 | 0.13  | -0.081 | 0.27  | -0.48 | 0.18  | 13800 | 10000 | 12500 | 16100 | 15300 | 17000 | 10600 | 16600 | 985   | 1967.9 | 2 | 0.0146 | 7.429 |
| Protein disulfide isomerase family A member 3 OS=Ovis aries GN=PDIA3 PE=2 SV=1 | tr C6JUQ0 C6JUQ0_SHEEP, tr D3K382 D3K382_C | mDATAN DVP SPYE | 95% | 74.4 | 51.26356 | Ref | -0.11 | 0.12  | -0.01 | -0.13  | 0.11  | -0.18 | 0.056 | 3740  | 3150  | 4020  | 4120  | 4180  | 4320  | 3670  | 4310  | 993   | 1983.9 | 2 | 0.0108 | 5.461 |
| Protein disulfide isomerase family A member 3 OS=Ovis aries GN=PDIA3 PE=2 SV=1 | tr C6JUQ0 C6JUQ0_SHEEP, tr D3K382 D3K382_C | mDATAN DVP SPYE | 95% | 71.6 | 50.59556 | Ref | -0.12 | 0.008 | 0.028 | -0.14  | 0.16  | -0.26 | 0.11  | 5450  | 4470  | 5280  | 6010  | 5890  | 6340  | 4960  | 6350  | 985.5 | 1968.9 | 2 | 0.0163 | 8.292 |

|                                                                                |                                            |                     |     |     |      |          |     |       |       |       |        |       |       |       |       |       |       |       |       |       |       |       |       |        |   |        |       |
|--------------------------------------------------------------------------------|--------------------------------------------|---------------------|-----|-----|------|----------|-----|-------|-------|-------|--------|-------|-------|-------|-------|-------|-------|-------|-------|-------|-------|-------|-------|--------|---|--------|-------|
| Protein disulfide isomerase family A member 3 OS=Ovis aries GN=PDIA3 PE=2 SV=1 | tr C6JUQ0 C6JUQ0_SHEEP, tr D3K382 D3K382_C | mDAN<br>DVP<br>SPyE | VR  | 59% | 34.8 | 53.83171 | Ref | 0.05  | -0.07 | 0.047 | -0.12  | -0.08 | 0.025 | 0.036 | 10600 | 10200 | 10200 | 12400 | 12200 | 11000 | 12300 | 12300 | 758.4 | 2272.1 | 3 | 0.0225 | 9.909 |
| Protein disulfide isomerase family A member 3 OS=Ovis aries GN=PDIA3 PE=2 SV=1 | tr C6JUQ0 C6JUQ0_SHEEP, tr D3K382 D3K382_C | sEPI<br>PESN<br>DGP | Vk  | 91% | 44.8 | 53.93998 | Ref | 0.054 | -0.08 | 0.3   | -0.057 | 0.14  | -0.31 | -0.23 | 17800 | 17200 | 17000 | 24900 | 21400 | 21400 | 16400 | 17100 | 989   | 1976.1 | 2 | 0.0166 | 8.383 |
| Protein disulfide isomerase family A member 3 OS=Ovis aries GN=PDIA3 PE=2 SV=1 | tr C6JUQ0 C6JUQ0_SHEEP, tr D3K382 D3K382_C | sEPI<br>PESn<br>DGP | Vk  | 86% | 41.5 | 53.77016 | Ref | 0.18  | -0.19 | 0.17  | -0.14  | 0.15  | -0.28 | -0.28 | 11400 | 10600 | 8860  | 12800 | 11300 | 12100 | 9390  | 9300  | 989.5 | 1977   | 2 | 0.0169 | 8.565 |
| Protein disulfide isomerase family A member 3 OS=Ovis aries GN=PDIA3 PE=2 SV=1 | tr C6JUQ0 C6JUQ0_SHEEP, tr D3K382 D3K382_C | tAD<br>GIVS         | HLk | 95% | 66.4 | 51.23068 | Ref | 0.15  | -0.03 | 0.052 | -0.26  | 0.042 | -0.13 | -0.16 | 4210  | 3790  | 3610  | 4300  | 3810  | 4110  | 3810  | 3690  | 825   | 1648   | 2 | 0.0106 | 6.425 |



|                                                                                |                                            |                 |     |      |          |     |       |       |       |        |       |       |       |       |       |       |       |       |       |       |       |       |        |   |        |       |
|--------------------------------------------------------------------------------|--------------------------------------------|-----------------|-----|------|----------|-----|-------|-------|-------|--------|-------|-------|-------|-------|-------|-------|-------|-------|-------|-------|-------|-------|--------|---|--------|-------|
| Protein disulfide isomerase family A member 3 OS=Ovis aries GN=PDIA3 PE=2 SV=1 | tr C6JUQ0 C6JUQ0_SHEEP, tr D3K382 D3K382_C | tAD GIVS HLK    | 95% | 63.8 | 51.0779  | Ref | 0.17  | -0.09 | 0.13  | -0.082 | -0.05 | -0.27 | -0.21 | 5500  | 4880  | 4420  | 5750  | 5490  | 4880  | 4380  | 4540  | 825   | 1648   | 2 | 0.0057 | 3.466 |
| Protein disulfide isomerase family A member 3 OS=Ovis aries GN=PDIA3 PE=2 SV=1 | tr C6JUQ0 C6JUQ0_SHEEP, tr D3K382 D3K382_C | tVSY TEQk       | 78% | 37.9 | 53.18687 | Ref | 0.2   | -0.1  | 0.19  | -0.077 | 0.023 | -0.3  | -0.24 | 30500 | 29700 | 26200 | 35900 | 32900 | 30800 | 25600 | 26700 | 782.4 | 1562.9 | 2 | 0.0142 | 9.111 |
| Protein disulfide isomerase family A member 3 OS=Ovis aries GN=PDIA3 PE=2 SV=1 | tr C6JUQ0 C6JUQ0_SHEEP, tr D3K382 D3K382_C | tVSY TEQk       | 75% | 37   | 53.18153 | Ref | 0.058 | -0.14 | 0.15  | -0.032 | 0.16  | -0.39 | -0.01 | 15800 | 15000 | 14200 | 19500 | 18900 | 18900 | 13500 | 17300 | 782.4 | 1562.9 | 2 | 0.0091 | 5.837 |
| Protein disulfide isomerase family A member 3 OS=Ovis aries GN=PDIA3 PE=2 SV=1 | tr C6JUQ0 C6JUQ0_SHEEP, tr D3K382 D3K382_C | vDcT ANT nTcN k | 60% | 28.2 | 47.14925 | Ref | -0.02 | 0.09  | -0.08 | 0.003  | -0.08 | -0.11 | 0.004 | 13200 | 11400 | 13300 | 13300 | 15500 | 12800 | 13100 | 14000 | 662.3 | 1983.9 | 3 | 0.0267 | 13.43 |

|                                                                                |                                                |              |     |      |          |     |        |       |       |        |       |       |       |       |       |       |       |       |       |       |       |       |        |   |        |       |
|--------------------------------------------------------------------------------|------------------------------------------------|--------------|-----|------|----------|-----|--------|-------|-------|--------|-------|-------|-------|-------|-------|-------|-------|-------|-------|-------|-------|-------|--------|---|--------|-------|
| Protein disulfide isomerase family A member 3 OS=Ovis aries GN=PDIA3 PE=2 SV=1 | tr C6JUQ0 C6JUQ0_SHEEP, tr D3K382 D3K382_C API | yGVS GYPT Lk | 64% | 34.5 | 52.52935 | Ref | 0.13   | -0.27 | 0.14  | 0.023  | 0.006 | -0.12 | 0.04  | 24100 | 26300 | 21700 | 32300 | 32800 | 28300 | 27000 | 30000 | 565   | 1692   | 3 | 0.0143 | 8.462 |
| Protein disulfide isomerase family A member 3 OS=Ovis aries GN=PDIA3 PE=2 SV=1 | tr C6JUQ0 C6JUQ0_SHEEP, tr D3K382 D3K382_C API | yGVS GYPT Lk | 75% | 36.7 | 52.68611 | Ref | 0.16   | -0.15 | -0.09 | -0.087 | 0.02  | -0.22 | 0.042 | 22400 | 20400 | 17900 | 20900 | 23100 | 21700 | 19200 | 22800 | 847   | 1692   | 2 | 0.0189 | 11.16 |
| Uncharacterized protein OS=Bos taurus PE=4 SV=1                                | tr F1MDC1 F1MDC1_BOVIN                         | aAIL EAA Pk  | 90% | 41   | 49.19941 | Ref | -0.011 | -0.12 | -0.21 | -0.34  | -0.25 | -0.27 | -0.36 | 8900  | 8000  | 8050  | 8480  | 8550  | 7960  | 8200  | 7610  | 498   | 1490.9 | 3 | 0.0285 | 19.09 |
| Uncharacterized protein OS=Bos taurus PE=4 SV=1                                | tr F1MDC1 F1MDC1_BOVIN                         | aAIL EAA Pk  | 62% | 28.3 | 47.25544 | Ref | -0.15  | -0.19 | -0.21 | -0.13  | -0.15 | -0.29 | -0.3  | 16300 | 14300 | 15200 | 16700 | 19500 | 16800 | 15900 | 15700 | 746.5 | 1490.9 | 2 | 0.0049 | 3.262 |
| Uncharacterized protein OS=Bos taurus PE=4 SV=1                                | tr F1MDC1 F1MDC1_BOVIN                         | aAIL EAA Pk  | 53% | 26.7 | 46.78873 | Ref | 0.11   | 0.32  | -0.44 | -0.23  | -0.49 | -0.35 | -0.43 | 4110  | 4670  | 5900  | 3910  | 4970  | 3620  | 4170  | 3920  | 498   | 1490.9 | 3 | 0.0016 | 1.054 |
| Uncharacterized protein OS=Bos taurus PE=4 SV=1                                | tr F1MDC1 F1MDC1_BOVIN                         | aDG TPN QGk  | 71% | 35.7 | 52.19794 | Ref | -0.36  | -0.02 | -0.35 | -0.27  | -0.11 | -0.5  | -0.14 | 17900 | 11400 | 15700 | 14000 | 16300 | 16000 | 12700 | 16200 | 499.3 | 1494.8 | 3 | 0.006  | 4.023 |

|                                                 |                        |                  |     |      |          |     |        |       |       |       |       |       |       |       |       |       |       |       |       |       |       |       |        |   |        |       |
|-------------------------------------------------|------------------------|------------------|-----|------|----------|-----|--------|-------|-------|-------|-------|-------|-------|-------|-------|-------|-------|-------|-------|-------|-------|-------|--------|---|--------|-------|
| Uncharacterized protein OS=Bos taurus PE=4 SV=1 | tr F1MDC1 F1MDC1_BOVIN | aEG AQN QGk      | 63% | 33.9 | 52.28393 | Ref | -0.33  | -0.09 | -0.29 | -0.32 | -0.1  | -0.24 | -0.22 | 23000 | 16200 | 20700 | 20200 | 21800 | 22100 | 21000 | 21100 | 504.3 | 1509.8 | 3 | 0.0136 | 8.988 |
| Uncharacterized protein OS=Bos taurus PE=4 SV=1 | tr F1MDC1 F1MDC1_BOVIN | aEG AQN QGk      | 81% | 38   | 52.35663 | Ref | -0.34  | -0.14 | -0.19 | -0.27 | 0.06  | -0.43 | -0.32 | 8690  | 6020  | 7460  | 8080  | 8440  | 9270  | 6890  | 7400  | 755.9 | 1509.8 | 2 | 0.0199 | 13.15 |
| Uncharacterized protein OS=Bos taurus PE=4 SV=1 | tr F1MDC1 F1MDC1_BOVIN | aEG AQN QGk      | 64% | 34.1 | 52.28726 | Ref | -0.15  | -0.03 | -0.23 | -0.29 | -0.12 | -0.48 | -0.3  | 41800 | 33600 | 39400 | 38600 | 40900 | 40000 | 32600 | 36700 | 504.3 | 1509.8 | 3 | 0.014  | 9.286 |
| Uncharacterized protein OS=Bos taurus PE=4 SV=1 | tr F1MDC1 F1MDC1_BOVIN | aEG AQn QGk      | 91% | 43.3 | 52.4612  | Ref | -0.45  | -0.04 | -0.21 | -0.16 | -0.07 | -0.44 | -0.45 | 6960  | 4040  | 5820  | 5820  | 6610  | 6160  | 4980  | 4890  | 756.4 | 1510.8 | 2 | 0.0123 | 8.144 |
| Uncharacterized protein OS=Bos taurus PE=4 SV=1 | tr F1MDC1 F1MDC1_BOVIN | aEGT SnQ Gk      | 92% | 43.8 | 51.78865 | Ref | -0.47  | -0.04 | -0.3  | -0.14 | -0.14 | -0.27 | -0.5  | 4620  | 2580  | 3770  | 3550  | 4370  | 3800  | 3630  | 3070  | 750.9 | 1499.8 | 2 | 0.0169 | 11.29 |
| Uncharacterized protein OS=Bos taurus PE=4 SV=1 | tr F1MDC1 F1MDC1_BOVIN | dALN QAT SQV ESk | 95% | 62.2 | 53.95279 | Ref | -0.022 | -0.02 | -0.5  | -0.47 | -0.29 | -0.3  | -0.19 | 2510  | 2010  | 2190  | 1760  | 1970  | 1950  | 2020  | 2170  | 667   | 1998.1 | 3 | 0.0114 | 5.698 |
| Uncharacterized protein OS=Bos taurus PE=4 SV=1 | tr F1MDC1 F1MDC1_BOVIN | dALN QAT SQV ESk | 95% | 71.9 | 53.91692 | Ref | -0.2   | -0.32 | -0.1  | -0.16 | -0.25 | -0.36 | -0.27 | 7560  | 5570  | 5580  | 7310  | 7730  | 6340  | 6140  | 6480  | 1000  | 1998.1 | 2 | 0.014  | 7.01  |

|                                                 |                        |                |     |      |          |     |       |       |       |        |       |       |       |       |       |       |       |       |       |       |       |       |        |   |        |       |
|-------------------------------------------------|------------------------|----------------|-----|------|----------|-----|-------|-------|-------|--------|-------|-------|-------|-------|-------|-------|-------|-------|-------|-------|-------|-------|--------|---|--------|-------|
| Uncharacterized protein OS=Bos taurus PE=4 SV=1 | tr F1MDC1 F1MDC1_BOVIN | eQEITAVQAR     | 57% | 32.2 | 51.9168  | Ref | -0.17 | -0.23 | -0.31 | -0.19  | -0.26 | -0.15 | -0.27 | 28800 | 22500 | 23400 | 24800 | 29800 | 24700 | 28000 | 25500 | 724.9 | 1447.8 | 2 | 0.0138 | 9.501 |
| Uncharacterized protein OS=Bos taurus PE=4 SV=1 | tr F1MDC1 F1MDC1_BOVIN | eQQQQMAELHGK   | 95% | 57.8 | 54.22288 | Ref | -0.08 | -0.28 | -0.74 | -0.13  | 0.036 | 0.12  | -0.95 | 25100 | 19300 | 18200 | 14900 | 25000 | 24500 | 27300 | 12800 | 679   | 2034.1 | 3 | 0.0192 | 9.435 |
| Uncharacterized protein OS=Bos taurus PE=4 SV=1 | tr F1MDC1 F1MDC1_BOVIN | eQQQQmAEELHGK  | 95% | 62.7 | 53.75638 | Ref | -0.26 | -0.14 | -0.7  | -0.042 | 0.12  | -0.36 | -0.38 | 4970  | 3570  | 4210  | 3200  | 5570  | 5450  | 4080  | 3980  | 684.4 | 2050.1 | 3 | 0.0222 | 10.8  |
| Uncharacterized protein OS=Bos taurus PE=4 SV=1 | tr F1MDC1 F1MDC1_BOVIN | eSEELQK        | 72% | 35.6 | 52.51993 | Ref | -0.29 | -0.27 | -0.1  | -0.17  | -0.11 | -0.44 | -0.27 | 20900 | 14600 | 16000 | 20200 | 21300 | 19400 | 16100 | 18000 | 771.4 | 1540.8 | 2 | 0.0268 | 17.41 |
| Uncharacterized protein OS=Bos taurus PE=4 SV=1 | tr F1MDC1 F1MDC1_BOVIN | eVPMVVPVSPVGAk | 57% | 31.9 | 51.6482  | Ref | -0.3  | -0.22 | -0.2  | -0.23  | -0.41 | 0.15  | -0.4  | 3780  | 2730  | 3140  | 3580  | 3850  | 2960  | 4560  | 3110  | 960.6 | 1919.1 | 2 | 0.0149 | 7.747 |
| Uncharacterized protein OS=Bos taurus PE=4 SV=1 | tr F1MDC1 F1MDC1_BOVIN | gDPVVILk       | 88% | 34.7 | 46.11288 | Ref | -0.2  | -0.1  | -0.26 | -0.21  | -0.22 | -0.29 | -0.39 | 43500 | 31600 | 36700 | 36900 | 42000 | 36400 | 36200 | 33600 | 725   | 1447.9 | 2 | 0.0078 | 5.376 |
| Uncharacterized protein OS=Bos taurus PE=4 SV=1 | tr F1MDC1 F1MDC1_BOVIN | gEGAQnQGk      | 91% | 43.6 | 52.46117 | Ref | -0.54 | -0.22 | -0.19 | -0.15  | -0    | -0.38 | -0.28 | 3510  | 1980  | 2670  | 3070  | 3490  | 3360  | 2710  | 2870  | 749.4 | 1496.8 | 2 | 0.0011 | 0.714 |

|                                                 |                        |                           |     |      |          |     |       |       |       |        |       |       |       |       |        |       |        |        |       |       |        |       |        |   |        |       |
|-------------------------------------------------|------------------------|---------------------------|-----|------|----------|-----|-------|-------|-------|--------|-------|-------|-------|-------|--------|-------|--------|--------|-------|-------|--------|-------|--------|---|--------|-------|
| Uncharacterized protein OS=Bos taurus PE=4 SV=1 | tr F1MDC1 F1MDC1_BOVIN | gSAP<br>ATSS<br>TQG<br>k  | 95% | 51.3 | 53.09458 | Ref | -0.18 | -0.37 | -0.22 | -0.32  | 0.092 | -0.34 | -0.32 | 7140  | 5440   | 5180  | 6460   | 6640   | 7710  | 5970  | 6030   | 850.5 | 1698.9 | 2 | 0.016  | 9.389 |
| Uncharacterized protein OS=Bos taurus PE=4 SV=1 | tr F1MDC1 F1MDC1_BOVIN | gSAP<br>ATSS<br>TQG<br>k  | 77% | 38.1 | 53.00295 | Ref | -0.29 | -0.14 | -0.32 | -0.35  | -0.05 | -0.18 | -0.29 | 13700 | 9690   | 11700 | 11500  | 12500  | 13400 | 12800 | 11700  | 567.3 | 1698.9 | 3 | 0.0227 | 13.38 |
| Uncharacterized protein OS=Bos taurus PE=4 SV=1 | tr F1MDC1 F1MDC1_BOVIN | kAEG<br>AQn<br>QGk        | 79% | 38.8 | 53.00782 | Ref | -0.47 | -0.06 | -0.11 | -0.21  | -0.01 | -0.51 | -0.33 | 3E+05 | 202000 | 3E+05 | 315000 | 325000 | 3E+05 | 2E+05 | 269000 | 648.7 | 1943.1 | 3 | 0.0213 | 10.95 |
| Uncharacterized protein OS=Bos taurus PE=4 SV=1 | tr F1MDC1 F1MDC1_BOVIN | kAEG<br>TPN<br>QGk        | 57% | 32.1 | 51.51532 | Ref | -0.37 | -0.02 | -0.31 | -0.098 | -0.02 | -0.45 | -0.28 | 12100 | 8650   | 12000 | 11000  | 14000  | 13000 | 10100 | 11200  | 648.1 | 1941.1 | 3 | 0.0046 | 2.345 |
| Uncharacterized protein OS=Bos taurus PE=4 SV=1 | tr F1MDC1 F1MDC1_BOVIN | kAEG<br>TPn<br>QGk        | 59% | 34.1 | 53.1828  | Ref | -0.42 | -0.22 | -0.15 | -0.26  | 0.083 | -0.4  | -0.31 | 19700 | 12600  | 15800 | 18500  | 18900  | 21000 | 15700 | 16600  | 648.4 | 1942.1 | 3 | 0.0381 | 19.59 |
| Uncharacterized protein OS=Bos taurus PE=4 SV=1 | tr F1MDC1 F1MDC1_BOVIN | ILAT<br>EQE<br>DAA<br>VAK | 95% | 65.6 | 53.22463 | Ref | -0.25 | -0.36 | -0.34 | -0.082 | -0.16 | -0.01 | -0.41 | 23100 | 17200  | 17300 | 19700  | 26000  | 21500 | 24900 | 18700  | 656.4 | 1966.1 | 3 | 0.0165 | 8.373 |
| Uncharacterized protein OS=Bos taurus PE=4 SV=1 | tr F1MDC1 F1MDC1_BOVIN | ILAT<br>EQE<br>DAA<br>VAK | 95% | 75.9 | 53.18739 | Ref | -0.18 | -0.11 | -0.21 | -0.12  | -0.15 | -0.38 | -0.5  | 6980  | 5340   | 6080  | 6360   | 7470   | 6370  | 5680  | 5200   | 984.1 | 1966.1 | 2 | 0.0145 | 7.369 |

|                                                 |                        |                 |     |      |          |     |       |       |       |        |       |       |       |       |       |       |       |       |       |       |       |       |        |   |        |       |
|-------------------------------------------------|------------------------|-----------------|-----|------|----------|-----|-------|-------|-------|--------|-------|-------|-------|-------|-------|-------|-------|-------|-------|-------|-------|-------|--------|---|--------|-------|
| Uncharacterized protein OS=Bos taurus PE=4 SV=1 | tr F1MDC1 F1MDC1_BOVIN | IMEI LADk       | 58% | 31.9 | 51.09592 | Ref | -0.3  | -0.31 | -0.13 | -0.25  | -0.22 | -0.11 | -0.24 | 8160  | 5910  | 6350  | 8100  | 8210  | 7310  | 8230  | 7480  | 514.3 | 1539.9 | 3 | #####  | 0.435 |
| Uncharacterized protein OS=Bos taurus PE=4 SV=1 | tr F1MDC1 F1MDC1_BOVIN | IMEI LADk       | 64% | 34   | 52.02259 | Ref | -0.29 | -0.19 | -0.34 | -0.33  | -0.27 | -0.14 | -0.38 | 5450  | 3250  | 3770  | 3800  | 4230  | 3860  | 4400  | 3700  | 514.3 | 1539.9 | 3 | 0.0218 | 14.17 |
| Uncharacterized protein OS=Bos taurus PE=4 SV=1 | tr F1MDC1 F1MDC1_BOVIN | nAD MVQ SQE APk | 95% | 48.7 | 53.38974 | Ref | -0.4  | -0.23 | -0.18 | -0.16  | -0.07 | -0.3  | -0.4  | 5950  | 3690  | 4520  | 5230  | 5870  | 5460  | 4830  | 4480  | 963.5 | 1925   | 2 | 0.0204 | 10.57 |
| Uncharacterized protein OS=Bos taurus PE=4 SV=1 | tr F1MDC1 F1MDC1_BOVIN | qLSL TEA QTk    | 95% | 55.3 | 52.30513 | Ref | -0.44 | -0.2  | -0.25 | -0.082 | -0.09 | -0.2  | -0.44 | 12100 | 7480  | 9580  | 10400 | 12900 | 11200 | 10800 | 9120  | 864   | 1726   | 2 | 0.0156 | 9.028 |
| Uncharacterized protein OS=Bos taurus PE=4 SV=1 | tr F1MDC1 F1MDC1_BOVIN | qVL QLQ ASHk    | 54% | 31.3 | 51.56685 | Ref | -0.37 | -0.08 | -0.33 | -0.14  | -0.04 | -0.37 | -0.3  | 26200 | 17700 | 23600 | 22100 | 28000 | 26100 | 21600 | 22500 | 719.9 | 1437.8 | 2 | 0.0123 | 8.556 |
| Uncharacterized protein OS=Bos taurus PE=4 SV=1 | tr F1MDC1 F1MDC1_BOVIN | qVL QLQ ASHk    | 95% | 60.4 | 51.34563 | Ref | -0.23 | -0.31 | -0.29 | -0.16  | -0.15 | -0.19 | -0.21 | 30000 | 22900 | 23400 | 26600 | 32200 | 28300 | 28700 | 28100 | 587.4 | 1759   | 3 | 0.012  | 6.79  |
| Uncharacterized protein OS=Bos taurus PE=4 SV=1 | tr F1MDC1 F1MDC1_BOVIN | qVL QLQ ASHk    | 91% | 44.4 | 51.30884 | Ref | -0.19 | -0.18 | -0.29 | -0.18  | -0.18 | -0.19 | -0.2  | 29400 | 25200 | 27400 | 28500 | 34000 | 29600 | 30900 | 30400 | 587.4 | 1759   | 3 | 0.0111 | 6.279 |

|                                                 |                        |                       |     |      |          |     |        |       |       |        |       |       |       |       |       |       |       |       |       |       |       |       |        |   |        |       |
|-------------------------------------------------|------------------------|-----------------------|-----|------|----------|-----|--------|-------|-------|--------|-------|-------|-------|-------|-------|-------|-------|-------|-------|-------|-------|-------|--------|---|--------|-------|
| Uncharacterized protein OS=Bos taurus PE=4 SV=1 | tr F1MDC1 F1MDC1_BOVIN | tLQEQLEnGPSAQLAR      | 95% | 70   | 54.59827 | Ref | -0.064 | -0.12 | -0.22 | -0.36  | -0.34 | -0.32 | -0.17 | 6200  | 5230  | 5460  | 5720  | 5740  | 5050  | 5380  | 5900  | 1031  | 2059.1 | 2 | 0.0047 | 2.297 |
| Uncharacterized protein OS=Bos taurus PE=4 SV=1 | tr F1MDC1 F1MDC1_BOVIN | tLVS AVGS MV LSEGEAQR | 95% | 58   | 54.05085 | Ref | -0.008 | -0.04 | -0.35 | -0.27  | -0.27 | -0.19 | -0.08 | 4240  | 4920  | 5230  | 4710  | 5500  | 4820  | 5300  | 5710  | 713.4 | 2137.1 | 3 | 0.0172 | 8.039 |
| Uncharacterized protein OS=Bos taurus PE=4 SV=1 | tr F1MDC1 F1MDC1_BOVIN | tLVS AVGS MV LSEGEAQR | 95% | 73.1 | 54.09299 | Ref | -0.18  | -0.21 | -0.1  | -0.29  | -0.24 | -0.29 | -0.28 | 915   | 708   | 753   | 912   | 883   | 793   | 803   | 800   | 713.4 | 2137.1 | 3 | 0.0132 | 6.159 |
| Uncharacterized protein OS=Bos taurus PE=4 SV=1 | tr F1MDC1 F1MDC1_BOVIN | tLVS AVGS MV LSEGEAQR | 79% | 39.8 | 54.11519 | Ref | -0.24  | -0.12 | -0.03 | -0.25  | -0.29 | -0.26 | -0.13 | 243   | 221   | 260   | 311   | 295   | 250   | 266   | 290   | 713.4 | 2137.1 | 3 | 0.0075 | 3.507 |
| Uncharacterized protein OS=Bos taurus PE=4 SV=1 | tr F1MDC1 F1MDC1_BOVIN | vDAS ANQGk            | 83% | 38.5 | 52.21394 | Ref | -0.28  | -0.2  | -0.19 | -0.29  | -0.15 | -0.4  | -0.17 | 12000 | 8220  | 9460  | 10600 | 11000 | 10500 | 9280  | 10800 | 749.4 | 1496.8 | 2 | 0.0031 | 2.099 |
| Uncharacterized protein OS=Bos taurus PE=4 SV=1 | tr F1MDC1 F1MDC1_BOVIN | vEAD QQAR             | 95% | 64.6 | 50.64645 | Ref | -0.33  | -0.08 | -0.22 | -0.069 | -0.08 | -0.19 | -0.34 | 17100 | 14600 | 18800 | 19100 | 23400 | 20200 | 19600 | 17600 | 450.2 | 1347.7 | 3 | 0.0098 | 7.285 |
| Transgelin-2 OS=Bos taurus GN=TAGLN2 PE=2 SV=3  | sp Q5E9F5 TAGLN2_BOVIN | eNF QNWLK             | 94% | 47.1 | 53.08963 | Ref | 0.044  | -0.16 | 0.017 | -0.072 | -0    | -0.46 | -0.13 | 4220  | 3440  | 3250  | 4110  | 4260  | 3900  | 2980  | 3700  | 844   | 1685.9 | 2 | 0.0167 | 9.901 |

|                                                         |                       |                                |     |      |          |     |        |       |       |        |      |       |       |       |       |       |       |       |       |       |       |       |        |   |        |       |
|---------------------------------------------------------|-----------------------|--------------------------------|-----|------|----------|-----|--------|-------|-------|--------|------|-------|-------|-------|-------|-------|-------|-------|-------|-------|-------|-------|--------|---|--------|-------|
| Transgelin-2<br>OS=Bos taurus<br>GN=TAGLN2 PE=2<br>SV=3 | sp Q5E9F5 TAGL2_BOVIN | gAS<br>QAG<br>MTG<br>YGM<br>PR | 95% | 57.7 | 50.092   | Ref | -0.12  | -0.34 | -0.1  | 0.03   | 0.23 | -0.47 | -0.04 | 22000 | 16000 | 15000 | 19800 | 23900 | 23900 | 15400 | 20600 | 844.4 | 1686.8 | 2 | 0.0124 | 7.361 |
| Transgelin-2<br>OS=Bos taurus<br>GN=TAGLN2 PE=2<br>SV=3 | sp Q5E9F5 TAGL2_BOVIN | gAS<br>QAG<br>MTG<br>YGM<br>PR | 95% | 71.1 | 50.28531 | Ref | -0.074 | -0.28 | -0.03 | -0.066 | 0.28 | -0.49 | 0.085 | 9850  | 8750  | 8230  | 11000 | 11800 | 13100 | 8050  | 11900 | 844.4 | 1686.8 | 2 | 0.01   | 5.915 |
| Transgelin-2<br>OS=Bos taurus<br>GN=TAGLN2 PE=2<br>SV=3 | sp Q5E9F5 TAGL2_BOVIN | gAS<br>QAG<br>mTG<br>YGM<br>PR | 86% | 36.9 | 49.23379 | Ref | -0.35  | -0.23 | -0.15 | -0.067 | 0.34 | -0.37 | 0.15  | 3810  | 2640  | 3090  | 3670  | 4290  | 4970  | 3170  | 4500  | 852.4 | 1702.8 | 2 | 0.0154 | 9.015 |
| Transgelin-2<br>OS=Bos taurus<br>GN=TAGLN2 PE=2<br>SV=3 | sp Q5E9F5 TAGL2_BOVIN | gAS<br>QAG<br>mTG<br>YGM<br>PR | 95% | 47.3 | 49.45606 | Ref | -0.29  | -0.21 | 0.003 | -0.11  | 0.31 | -0.56 | 0.27  | 5720  | 4560  | 5230  | 6800  | 6960  | 8100  | 4620  | 8160  | 852.4 | 1702.8 | 2 | 0.0128 | 7.512 |
| Transgelin-2<br>OS=Bos taurus<br>GN=TAGLN2 PE=2<br>SV=3 | sp Q5E9F5 TAGL2_BOVIN | gAS<br>QAG<br>MTG<br>YGM<br>PR | 59% | 33.6 | 53.04734 | Ref | -0.13  | -0.38 | -0.09 | -0.012 | 0.18 | -0.45 | 0.064 | 7000  | 5030  | 4580  | 6280  | 7310  | 7270  | 4910  | 6980  | 996.5 | 1991   | 2 | 0.0175 | 8.809 |
| Transgelin-2<br>OS=Bos taurus<br>GN=TAGLN2 PE=2<br>SV=3 | sp Q5E9F5 TAGL2_BOVIN | gAS<br>QAG<br>MTG<br>YGM<br>PR | 95% | 48.6 | 49.58181 | Ref | -0.19  | -0.21 | -0.12 | -0.072 | 0.34 | -0.43 | 0.18  | 8040  | 7090  | 7540  | 9060  | 10300 | 12000 | 7310  | 11100 | 852.4 | 1702.8 | 2 | 0.0104 | 6.08  |
| Transgelin-2<br>OS=Bos taurus<br>GN=TAGLN2 PE=2<br>SV=3 | sp Q5E9F5 TAGL2_BOVIN | gAS<br>QAG<br>MTG<br>YGM<br>PR | 95% | 51.7 | 49.32606 | Ref | -0.17  | -0.25 | -0.14 | -0.026 | 0.44 | -0.49 | 0.14  | 3330  | 3080  | 3160  | 3820  | 4560  | 5510  | 3020  | 4630  | 852.4 | 1702.8 | 2 | 0.0145 | 8.51  |



|                                                         |                       |                         |     |      |          |     |        |       |       |        |       |       |       |       |        |       |        |        |       |       |        |       |        |   |        |       |
|---------------------------------------------------------|-----------------------|-------------------------|-----|------|----------|-----|--------|-------|-------|--------|-------|-------|-------|-------|--------|-------|--------|--------|-------|-------|--------|-------|--------|---|--------|-------|
| Transgelin-2<br>OS=Bos taurus<br>GN=TAGLN2 PE=2<br>SV=3 | sp Q5E9F5 TAGL2_BOVIN | iQAS<br>TMA<br>Fk       | 79% | 38.3 | 52.50839 | Ref | 0.033  | -0.31 | -0.09 | -0.018 | 0.014 | -0.46 | -0.08 | 22100 | 16500  | 14100 | 18400  | 21400  | 19100 | 14300 | 18500  | 535.6 | 1603.9 | 3 | 0.017  | 10.61 |
| Transgelin-2<br>OS=Bos taurus<br>GN=TAGLN2 PE=2<br>SV=3 | sp Q5E9F5 TAGL2_BOVIN | iQAS<br>TMA<br>Fk       | 92% | 44.4 | 52.50703 | Ref | -0.081 | -0.29 | 0.008 | -0.041 | 0.11  | -0.26 | -0.03 | 15000 | 12300  | 11500 | 15900  | 17000  | 16400 | 13300 | 15400  | 803   | 1603.9 | 2 | 0.0173 | 10.79 |
| Transgelin-2<br>OS=Bos taurus<br>GN=TAGLN2 PE=2<br>SV=3 | sp Q5E9F5 TAGL2_BOVIN | iQAS<br>TMA<br>Fk       | 82% | 39.9 | 52.61884 | Ref | -0.054 | -0.33 | 0.19  | -0.094 | 0.25  | -0.46 | -0.19 | 1E+05 | 105000 | 93300 | 151000 | 136000 | 2E+05 | 96400 | 115000 | 535.6 | 1603.9 | 3 | 0.0154 | 9.579 |
| Transgelin-2<br>OS=Bos taurus<br>GN=TAGLN2 PE=2<br>SV=3 | sp Q5E9F5 TAGL2_BOVIN | iQAS<br>TmA<br>Fk       | 79% | 38.8 | 52.80588 | Ref | 0.05   | -0.22 | -0.18 | -0.14  | 0.14  | -0.31 | -0.02 | 29400 | 25300  | 22800 | 26300  | 29700  | 31600 | 24200 | 29400  | 541   | 1619.9 | 3 | 0.0132 | 8.16  |
| Transgelin-2<br>OS=Bos taurus<br>GN=TAGLN2 PE=2<br>SV=3 | sp Q5E9F5 TAGL2_BOVIN | kiQA<br>STM<br>AFk      | 93% | 47   | 51.96715 | Ref | -0.24  | -0.37 | -0.02 | -0.017 | 0.27  | -0.27 | -0.09 | 1E+05 | 71300  | 70700 | 101000 | 111000 | 1E+05 | 85100 | 95900  | 679.7 | 2036.2 | 3 | 0.0374 | 18.34 |
| Transgelin-2<br>OS=Bos taurus<br>GN=TAGLN2 PE=2<br>SV=3 | sp Q5E9F5 TAGL2_BOVIN | nVIG<br>LQm<br>GTn<br>R | 70% | 35.8 | 52.51446 | Ref | 0.081  | -0.25 | -0.19 | -0.37  | -0.1  | 0.42  | -0.16 | 9420  | 9530   | 8230  | 9640   | 9360   | 9850  | 14800 | 9800   | 508.3 | 1521.8 | 3 | 0.0109 | 7.129 |
| Transgelin-2<br>OS=Bos taurus<br>GN=TAGLN2 PE=2<br>SV=3 | sp Q5E9F5 TAGL2_BOVIN | nVIG<br>LOM<br>GTn<br>R | 81% | 38.4 | 52.62363 | Ref | 0.012  | -0.24 | -0.03 | -0.14  | 0.057 | -0.34 | 0.041 | 36600 | 31300  | 28600 | 37100  | 37800  | 37900 | 30000 | 38800  | 754.4 | 1506.8 | 2 | 0.0112 | 7.437 |

|                                                         |                       |                            |     |      |          |     |        |       |       |        |       |       |       |       |       |       |       |       |       |       |       |       |        |   |        |       |
|---------------------------------------------------------|-----------------------|----------------------------|-----|------|----------|-----|--------|-------|-------|--------|-------|-------|-------|-------|-------|-------|-------|-------|-------|-------|-------|-------|--------|---|--------|-------|
| Transgelin-2<br>OS=Bos taurus<br>GN=TAGLN2 PE=2<br>SV=3 | sp Q5E9F5 TAGL2_BOVIN | qME<br>QISQ<br>FLQA<br>AER | 94% | 51.1 | 53.35508 | Ref | 0.051  | -0.19 | 0.12  | -0.29  | 0.004 | -0.21 | -0.05 | 4330  | 4000  | 3680  | 5110  | 4240  | 4540  | 4070  | 4530  | 661.7 | 1982   | 3 | 0.0126 | 6.368 |
| Transgelin-2<br>OS=Bos taurus<br>GN=TAGLN2 PE=2<br>SV=3 | sp Q5E9F5 TAGL2_BOVIN | qME<br>QISQ<br>FLQA<br>AER | 95% | 62.4 | 53.18614 | Ref | 0.3    | 0.4   | -0.19 | -0.25  | -0.54 | -0.59 | -0.42 | 2750  | 2340  | 2730  | 2040  | 2160  | 1530  | 1550  | 1730  | 661.7 | 1982   | 3 | 0.0183 | 9.227 |
| Transgelin-2<br>OS=Bos taurus<br>GN=TAGLN2 PE=2<br>SV=3 | sp Q5E9F5 TAGL2_BOVIN | qME<br>QISQ<br>FLQA<br>AER | 88% | 42.4 | 53.41179 | Ref | -0.003 | -0.48 | 0.043 | -0.12  | 0.21  | -0.34 | 0.033 | 2000  | 1750  | 1360  | 2200  | 2170  | 2370  | 1700  | 2180  | 992   | 1982   | 2 | 0.0108 | 5.467 |
| Transgelin-2<br>OS=Bos taurus<br>GN=TAGLN2 PE=2<br>SV=3 | sp Q5E9F5 TAGL2_BOVIN | qME<br>QISQ<br>FLQA<br>AER | 82% | 40.4 | 53.38771 | Ref | 0.25   | 0.003 | -0.32 | -0.24  | -0.35 | 0.11  | -0.21 | 426   | 413   | 379   | 340   | 395   | 320   | 459   | 367   | 661.7 | 1982   | 3 | 0.0112 | 5.626 |
| Transgelin-2<br>OS=Bos taurus<br>GN=TAGLN2 PE=2<br>SV=3 | sp Q5E9F5 TAGL2_BOVIN | qME<br>QISQ<br>FLQA<br>AER | 95% | 55.9 | 53.43911 | Ref | 0.18   | -0.24 | 0.047 | -0.26  | 0.097 | -0.18 | -0.12 | 436   | 473   | 384   | 525   | 466   | 523   | 449   | 465   | 661.7 | 1982   | 3 | 0.0086 | 4.341 |
| Transgelin-2<br>OS=Bos taurus<br>GN=TAGLN2 PE=2<br>SV=3 | sp Q5E9F5 TAGL2_BOVIN | qME<br>QISQ<br>FLQA<br>AER | 85% | 42   | 53.43983 | Ref | -0.19  | -0.25 | -0.15 | -0.018 | 0.19  | -0.38 | 0.23  | 277   | 224   | 234   | 282   | 340   | 342   | 241   | 366   | 661.7 | 1982   | 3 | 0.0073 | 3.69  |
| Transgelin-2<br>OS=Bos taurus<br>GN=TAGLN2 PE=2<br>SV=3 | sp Q5E9F5 TAGL2_BOVIN | tLM<br>NLG<br>GLA<br>VAR   | 65% | 33.7 | 51.95706 | Ref | -8E-04 | -0.37 | 0.033 | -0.088 | 0.057 | -0.36 | 0.015 | 89000 | 73000 | 61200 | 91000 | 92200 | 89100 | 69800 | 89600 | 760.4 | 1518.9 | 2 | 0.0116 | 7.613 |

|                                                         |                       |                          |     |      |          |     |        |       |       |        |       |       |       |       |       |       |       |       |       |       |       |       |        |   |        |       |
|---------------------------------------------------------|-----------------------|--------------------------|-----|------|----------|-----|--------|-------|-------|--------|-------|-------|-------|-------|-------|-------|-------|-------|-------|-------|-------|-------|--------|---|--------|-------|
| Transgelin-2<br>OS=Bos taurus<br>GN=TAGLN2 PE=2<br>SV=3 | sp Q5E9F5 TAGL2_BOVIN | tLM<br>NLG<br>GLA<br>VAR | 95% | 50.4 | 51.99785 | Ref | -0.26  | -0.9  | -0.43 | -0.72  | -0.61 | -0.93 | -0.81 | 15200 | 3500  | 2430  | 3800  | 3430  | 3220  | 2700  | 2910  | 507.3 | 1518.9 | 3 | 0.01   | 6.59  |
| Transgelin-2<br>OS=Bos taurus<br>GN=TAGLN2 PE=2<br>SV=3 | sp Q5E9F5 TAGL2_BOVIN | tLM<br>NLG<br>GLA<br>VAR | 84% | 38.6 | 51.70253 | Ref | 0.068  | -0.41 | 0.14  | -0.13  | 0.044 | -0.37 | 0.037 | 43200 | 40000 | 31200 | 51300 | 46700 | 46100 | 36100 | 47600 | 760.4 | 1518.9 | 2 | 0.0046 | 3.033 |
| Transgelin-2<br>OS=Bos taurus<br>GN=TAGLN2 PE=2<br>SV=3 | sp Q5E9F5 TAGL2_BOVIN | tLM<br>NLG<br>GLA<br>VAR | 95% | 64.5 | 51.48451 | Ref | 0.048  | -0.05 | 0.16  | -0.35  | 0.2   | -0.53 | -0.12 | 9680  | 9040  | 9180  | 11900 | 9200  | 11800 | 7410  | 9770  | 507.3 | 1518.9 | 3 | #####  | 0.141 |
| Transgelin-2<br>OS=Bos taurus<br>GN=TAGLN2 PE=2<br>SV=3 | sp Q5E9F5 TAGL2_BOVIN | tLM<br>NLG<br>GLA<br>VAR | 95% | 52.7 | 51.95562 | Ref | 0.0067 | -0.42 | 0.072 | -0.089 | 0.038 | -0.24 | -0.03 | 34200 | 29000 | 23400 | 36900 | 36400 | 34700 | 29800 | 34300 | 760.4 | 1518.9 | 2 | 0.0112 | 7.376 |
| Transgelin-2<br>OS=Bos taurus<br>GN=TAGLN2 PE=2<br>SV=3 | sp Q5E9F5 TAGL2_BOVIN | tLM<br>NLG<br>GLA<br>VAR | 95% | 50.7 | 51.94243 | Ref | 0.054  | -0.18 | 0.013 | -0.033 | -0.33 | -0.06 | 0.059 | 725   | 714   | 661   | 845   | 902   | 642   | 810   | 871   | 507.3 | 1518.9 | 3 | 0.0081 | 5.327 |
| Transgelin-2<br>OS=Bos taurus<br>GN=TAGLN2 PE=2<br>SV=3 | sp Q5E9F5 TAGL2_BOVIN | tLM<br>NLG<br>GLA<br>VAR | 86% | 40.8 | 51.94243 | Ref | 0.12   | -0.18 | 0.023 | -0.13  | -0.17 | -0.33 | 0.002 | 780   | 713   | 627   | 811   | 805   | 684   | 639   | 797   | 507.3 | 1518.9 | 3 | 0.008  | 5.268 |
| Transgelin-2<br>OS=Bos taurus<br>GN=TAGLN2 PE=2<br>SV=3 | sp Q5E9F5 TAGL2_BOVIN | tLm<br>NLG<br>GLA<br>VAR | 93% | 48.5 | 52.14741 | Ref | 0.7    | -0.21 | -0.03 | -0.4   | -0.51 | -0.3  | -0.1  | 1950  | 2870  | 1660  | 2110  | 1800  | 1460  | 1750  | 2010  | 512.6 | 1534.9 | 3 | 0.0124 | 8.054 |

|                                                         |                       |                          |     |      |          |     |        |       |       |        |       |       |       |       |        |       |        |        |       |       |        |       |        |   |        |       |
|---------------------------------------------------------|-----------------------|--------------------------|-----|------|----------|-----|--------|-------|-------|--------|-------|-------|-------|-------|--------|-------|--------|--------|-------|-------|--------|-------|--------|---|--------|-------|
| Transgelin-2<br>OS=Bos taurus<br>GN=TAGLN2 PE=2<br>SV=3 | sp Q5E9F5 TAGL2_BOVIN | tLm<br>NLG<br>GLA<br>VAR | 59% | 32.7 | 52.19357 | Ref | 0.2    | -0.31 | -0    | -0.082 | 0.11  | -0.51 | -0.03 | 8260  | 8550   | 6540  | 9050   | 9450   | 9440  | 6410  | 8880   | 768.4 | 1534.9 | 2 | 0.0111 | 7.216 |
| Transgelin-2<br>OS=Bos taurus<br>GN=TAGLN2 PE=2<br>SV=3 | sp Q5E9F5 TAGL2_BOVIN | yFSD<br>NQL<br>QEG<br>k  | 76% | 38.2 | 53.44782 | Ref | -0.12  | -0.43 | 0.13  | 0.078  | 0.23  | -0.49 | -0.1  | 2E+05 | 162000 | 1E+05 | 236000 | 250000 | 2E+05 | 2E+05 | 201000 | 646.3 | 1936   | 3 | 0.0213 | 11    |
| Transgelin-2<br>OS=Bos taurus<br>GN=TAGLN2 PE=2<br>SV=3 | sp Q5E9F5 TAGL2_BOVIN | yFSD<br>NQL<br>QEG<br>k  | 69% | 36.4 | 53.54022 | Ref | -0.098 | -0.21 | -0.09 | 0.015  | 0.25  | -0.58 | -0.01 | 29400 | 23300  | 23400 | 28500  | 33800  | 34700 | 20400 | 30100  | 646.3 | 1936   | 3 | 0.0154 | 7.96  |
| Transgelin-2<br>OS=Bos taurus<br>GN=TAGLN2 PE=2<br>SV=3 | sp Q5E9F5 TAGL2_BOVIN | yFSD<br>NQL<br>QEG<br>k  | 67% | 36.1 | 53.56821 | Ref | 0.051  | -0.19 | -0.05 | -0.081 | -0.06 | -0.16 | -0.09 | 9530  | 8570   | 7890  | 9740   | 10500  | 9330  | 9100  | 9460   | 646.3 | 1936   | 3 | 0.0158 | 8.161 |
| Transgelin-2<br>OS=Bos taurus<br>GN=TAGLN2 PE=2<br>SV=3 | sp Q5E9F5 TAGL2_BOVIN | yFSD<br>NQL<br>QEG<br>k  | 92% | 45.6 | 53.51823 | Ref | -0.17  | -0.16 | -0.06 | 0.011  | 0.29  | -0.58 | -0.04 | 25300 | 19500  | 21100 | 25600  | 29500  | 31400 | 17900 | 25800  | 969   | 1936   | 2 | 0.0166 | 8.561 |
| Transgelin-2<br>OS=Bos taurus<br>GN=TAGLN2 PE=2<br>SV=3 | sp Q5E9F5 TAGL2_BOVIN | yFSD<br>NQL<br>QEG<br>k  | 51% | 32.9 | 53.60262 | Ref | -0.13  | -0.36 | 0.11  | -0.056 | 0.32  | -0.62 | 0.028 | 10500 | 8570   | 7900  | 12300  | 12100  | 13700 | 7440  | 11600  | 969   | 1936   | 2 | 0.0125 | 6.475 |
| Transgelin-2<br>OS=Bos taurus<br>GN=TAGLN2 PE=2<br>SV=3 | sp Q5E9F5 TAGL2_BOVIN | yFSD<br>NQL<br>QEG<br>k  | 95% | 49.5 | 53.49138 | Ref | -0.19  | -0.46 | 0.034 | -0.033 | 0.21  | -0.45 | 0.079 | 3290  | 2330   | 2100  | 3320   | 3490   | 3610  | 2390  | 3420   | 969   | 1936   | 2 | 0.0202 | 10.45 |

|                                                                             |                                                                                                                                        |                         |     |      |          |     |       |       |       |        |       |       |       |       |       |       |       |       |       |       |       |       |        |   |        |       |
|-----------------------------------------------------------------------------|----------------------------------------------------------------------------------------------------------------------------------------|-------------------------|-----|------|----------|-----|-------|-------|-------|--------|-------|-------|-------|-------|-------|-------|-------|-------|-------|-------|-------|-------|--------|---|--------|-------|
| Transgelin-2<br>OS=Bos taurus<br>GN=TAGLN2 PE=2<br>SV=3                     | sp Q5E9F5 TAGL2_BOVIN                                                                                                                  | yFSD<br>nQL<br>QEG<br>k | 93% | 46.2 | 53.04376 | Ref | -0.2  | -0.22 | -0.02 | -0.042 | 0.32  | -0.44 | -0.02 | 12300 | 9640  | 10300 | 13200 | 14400 | 16200 | 9940  | 13300 | 969.5 | 1937   | 2 | 0.0182 | 9.376 |
| Peptidyl-prolyl cis-trans isomerase A<br>OS=Bos taurus<br>GN=PPIA PE=1 SV=2 | sp P62935 PPIA_BOVIN,sp P62936 PPIA_PIG,trans F1MN08 F1MN08_BOVIN,trans F2Q9A3 F2Q9A3_PIG,trans F2Q9A4 F2Q9A4_PHAAF,trans Q861V5_BOVIN | aLST<br>Gek             | 55% | 30.9 | 51.00008 | Ref | 0.053 | -0.2  | -0.05 | -0.19  | 0.056 | -0.26 | -0.08 | 6710  | 6190  | 5630  | 7050  | 7040  | 7270  | 6090  | 6840  | 657.4 | 1312.8 | 2 | 0.0083 | 6.298 |
| Peptidyl-prolyl cis-trans isomerase A<br>OS=Bos taurus<br>GN=PPIA PE=1 SV=2 | sp P62935 PPIA_BOVIN,sp P62936 PPIA_PIG,trans F1MN08 F1MN08_BOVIN,trans F2Q9A3 F2Q9A3_PIG,trans F2Q9A4 F2Q9A4_PHAAF,trans Q861V5_BOVIN | eGM<br>NIVE<br>AME<br>R | 69% | 32.4 | 49.97041 | Ref | 0.2   | -0.38 | 0.13  | -0.14  | -0.04 | -0.26 | -0.23 | 36000 | 37200 | 27000 | 43200 | 39500 | 36800 | 33000 | 33600 | 791.9 | 1581.8 | 2 | 0.02   | 12.63 |

|                                                                             |                                                                                                                                           |            |   |     |      |          |     |        |       |       |       |       |       |       |       |       |       |       |       |       |       |       |       |        |   |        |       |
|-----------------------------------------------------------------------------|-------------------------------------------------------------------------------------------------------------------------------------------|------------|---|-----|------|----------|-----|--------|-------|-------|-------|-------|-------|-------|-------|-------|-------|-------|-------|-------|-------|-------|-------|--------|---|--------|-------|
| Peptidyl-prolyl cis-trans isomerase A<br>OS=Bos taurus<br>GN=PPIA PE=1 SV=2 | sp P62935 PPIA_BOVIN,sp P62936 PPIA_PIG,tron F1MN08 F1MN08_BOVIN,tron F2Q9A3 F2Q9A3_PIG,tron F2Q9A4 F2Q9A4_PHAAF,tron Q861V5 Q861V5_BOVIN | eGMNIVEAME | R | 89% | 41.9 | 50.49137 | Ref | -0.086 | -0.34 | 0.39  | -0.19 | 0.036 | -0.51 | -0.25 | 3630  | 2800  | 2550  | 4740  | 3500  | 3570  | 2550  | 3020  | 528.3 | 1581.8 | 3 | 0.0103 | 6.517 |
| Peptidyl-prolyl cis-trans isomerase A<br>OS=Bos taurus<br>GN=PPIA PE=1 SV=2 | sp P62935 PPIA_BOVIN,sp P62936 PPIA_PIG,tron F1MN08 F1MN08_BOVIN,tron F2Q9A3 F2Q9A3_PIG,tron F2Q9A4 F2Q9A4_PHAAF,tron Q861V5 Q861V5_BOVIN | eGMNIVEAmE | R | 64% | 31.3 | 49.74539 | Ref | 0.23   | -0.18 | 0.038 | -0.39 | 0.082 | -0.51 | -0.14 | 24100 | 23800 | 19500 | 25400 | 20800 | 25200 | 17500 | 22500 | 799.9 | 1597.8 | 2 | 0.0116 | 7.244 |
| Peptidyl-prolyl cis-trans isomerase A<br>OS=Bos taurus<br>GN=PPIA PE=1 SV=2 | sp P62935 PPIA_BOVIN,sp P62936 PPIA_PIG,tron F1MN08 F1MN08_BOVIN,tron F2Q9A3 F2Q9A3_PIG,tron F2Q9A4 F2Q9A4_PHAAF,tron Q861V5 Q861V5_BOVIN | fDDENFILk  |   | 80% | 38.9 | 53.56148 | Ref | 0.14   | -0.32 | 0.055 | -0.18 | 0.052 | -0.38 | -0.23 | 21500 | 19300 | 15200 | 22100 | 20800 | 21300 | 16500 | 18100 | 875   | 1747.9 | 2 | 0.0198 | 11.3  |

|                                                                             |                                                                                                                                           |              |     |      |          |     |      |       |       |       |       |       |       |       |       |       |       |       |       |       |       |     |        |   |        |       |
|-----------------------------------------------------------------------------|-------------------------------------------------------------------------------------------------------------------------------------------|--------------|-----|------|----------|-----|------|-------|-------|-------|-------|-------|-------|-------|-------|-------|-------|-------|-------|-------|-------|-----|--------|---|--------|-------|
| Peptidyl-prolyl cis-trans isomerase A<br>OS=Bos taurus<br>GN=PPIA PE=1 SV=2 | sp P62935 PPIA_BOVIN,sp P62936 PPIA_PIG,tron F1MN08 F1MN08_BOVIN,tron F2Q9A3 F2Q9A3_PIG,tron F2Q9A4 F2Q9A4_PHAAF,tron Q861V5 Q861V5_BOVIN | fDDE<br>NFIL | 95% | 51.6 | 53.57506 | Ref | 0.21 | -0.37 | 0.024 | -0.15 | -0.01 | -0.42 | -0.32 | 54700 | 48100 | 34800 | 51300 | 50300 | 48400 | 37900 | 40300 | 875 | 1748   | 2 | 0.0091 | 5.224 |
| Peptidyl-prolyl cis-trans isomerase A<br>OS=Bos taurus<br>GN=PPIA PE=1 SV=2 | sp P62935 PPIA_BOVIN,sp P62936 PPIA_PIG,tron F1MN08 F1MN08_BOVIN,tron F2Q9A3 F2Q9A3_PIG,tron F2Q9A4 F2Q9A4_PHAAF,tron Q861V5 Q861V5_BOVIN | fDDE<br>NFIL | 87% | 41.9 | 53.52331 | Ref | 0.35 | -0.38 | -0.04 | -0.29 | -0.05 | -0.4  | -0.28 | 26800 | 25200 | 16400 | 23400 | 21700 | 22400 | 18300 | 19700 | 875 | 1748   | 2 | 0.0033 | 1.874 |
| Peptidyl-prolyl cis-trans isomerase A<br>OS=Bos taurus<br>GN=PPIA PE=1 SV=2 | sp P62935 PPIA_BOVIN,sp P62936 PPIA_PIG,tron F1MN08 F1MN08_BOVIN,tron F2Q9A3 F2Q9A3_PIG,tron F2Q9A4 F2Q9A4_PHAAF,tron Q861V5 Q861V5_BOVIN | fDDE<br>NFIL | 95% | 55   | 53.32249 | Ref | 0.23 | -0.42 | -0.05 | -0.1  | -0.02 | -0.26 | -0.33 | 8300  | 7640  | 5280  | 7670  | 8130  | 7500  | 6650  | 6270  | 875 | 1747.9 | 2 | 0.0223 | 12.76 |

|                                                                             |                                                                                                                            |                                                         |     |      |          |     |        |       |       |       |       |       |       |      |      |      |      |      |      |      |      |       |        |   |        |       |
|-----------------------------------------------------------------------------|----------------------------------------------------------------------------------------------------------------------------|---------------------------------------------------------|-----|------|----------|-----|--------|-------|-------|-------|-------|-------|-------|------|------|------|------|------|------|------|------|-------|--------|---|--------|-------|
| Peptidyl-prolyl cis-trans isomerase A<br>OS=Bos taurus<br>GN=PPIA PE=1 SV=2 | sp P62935 PPIA_BOVIN,sp P62936 PPIA_PIG,tr F1MN08 F1MN08_BOVIN,tr F2Q9A3 F2Q9A3_PIG,tr F2Q9A4 F2Q9A4_PHAAF,tr Q861V5_BOVIN | hTGP<br>GILS<br>mAN<br>AGP<br>NTN<br>GSqF<br>FicT<br>Ak | 82% | 40.3 | 55.00013 | Ref | -0.071 | -0.57 | -0.02 | -0.16 | 0.052 | 0.082 | -0.03 | 1640 | 1400 | 1070 | 1760 | 1770 | 1790 | 1900 | 1750 | 852.2 | 3404.7 | 4 | 0.0233 | 6.845 |
| Peptidyl-prolyl cis-trans isomerase A<br>OS=Bos taurus<br>GN=PPIA PE=1 SV=2 | sp P62935 PPIA_BOVIN,sp P62936 PPIA_PIG,tr F1MN08 F1MN08_BOVIN,tr F2Q9A3 F2Q9A3_PIG,tr F2Q9A4 F2Q9A4_PHAAF,tr Q861V5_BOVIN | iIPGF<br>McQ<br>GGD<br>FTR                              | 95% | 56.8 | 51.17096 | Ref | 0.21   | -0.23 | 0.021 | -0.19 | -0.09 | -0.23 | -0.18 | 7350 | 7540 | 6020 | 8070 | 7710 | 7180 | 6800 | 7030 | 946.5 | 1890.9 | 2 | 0.0055 | 2.894 |
| Peptidyl-prolyl cis-trans isomerase A<br>OS=Bos taurus<br>GN=PPIA PE=1 SV=2 | sp P62935 PPIA_BOVIN,sp P62936 PPIA_PIG,tr F1MN08 F1MN08_BOVIN,tr F2Q9A3 F2Q9A3_PIG,tr F2Q9A4 F2Q9A4_PHAAF,tr Q861V5_BOVIN | iIPGF<br>McQ<br>GGD<br>FTR                              | 93% | 43.3 | 50.93467 | Ref | 0.22   | -0.31 | 0.073 | -0.26 | -0.04 | -0.21 | -0.22 | 1870 | 1890 | 1420 | 2080 | 1830 | 1850 | 1720 | 1700 | 946.5 | 1890.9 | 2 | 0.0105 | 5.537 |



|                                                                             |                                                                                                                                           |                     |     |      |          |     |      |       |       |        |       |       |       |       |       |       |       |       |       |       |       |       |        |   |        |       |
|-----------------------------------------------------------------------------|-------------------------------------------------------------------------------------------------------------------------------------------|---------------------|-----|------|----------|-----|------|-------|-------|--------|-------|-------|-------|-------|-------|-------|-------|-------|-------|-------|-------|-------|--------|---|--------|-------|
| Peptidyl-prolyl cis-trans isomerase A<br>OS=Bos taurus<br>GN=PPIA PE=1 SV=2 | sp P62935 PPIA_BOVIN,sp P62936 PPIA_PIG,tron F1MN08 F1MN08_BOVIN,tron F2Q9A3 F2Q9A3_PIG,tron F2Q9A4 F2Q9A4_PHAAF,tron Q861V5 Q861V5_BOVIN | iIPGF<br>mcQ<br>GGD | 92% | 42.2 | 50.52571 | Ref | 0.19 | -0.39 | -0.06 | -0.057 | -0.03 | -0.3  | -0.03 | 5910  | 6150  | 4460  | 6290  | 6950  | 6180  | 5370  | 6410  | 954.5 | 1906.9 | 2 | 0.0033 | 1.715 |
| Peptidyl-prolyl cis-trans isomerase A<br>OS=Bos taurus<br>GN=PPIA PE=1 SV=2 | sp P62935 PPIA_BOVIN,sp P62936 PPIA_PIG,tron F1MN08 F1MN08_BOVIN,tron F2Q9A3 F2Q9A3_PIG,tron F2Q9A4 F2Q9A4_PHAAF,tron Q861V5 Q861V5_BOVIN | kITIA<br>DcG<br>QI  | 65% | 34.9 | 52.9209  | Ref | 0.15 | -0.44 | -0.03 | -0.1   | 0.071 | -0.28 | -0.14 | 33100 | 31800 | 22900 | 34000 | 35800 | 35200 | 28900 | 31600 | 572.7 | 1714.9 | 3 | 0.0146 | 8.523 |
| Peptidyl-prolyl cis-trans isomerase A<br>OS=Bos taurus<br>GN=PPIA PE=1 SV=2 | sp P62935 PPIA_BOVIN,sp P62936 PPIA_PIG,tron F1MN08 F1MN08_BOVIN,tron F2Q9A3 F2Q9A3_PIG,tron F2Q9A4 F2Q9A4_PHAAF,tron Q861V5 Q861V5_BOVIN | kITIA<br>DcG<br>QI  | 65% | 34.6 | 52.9764  | Ref | 0.1  | -0.39 | 0.11  | -0.19  | 0.087 | -0.33 | -0.17 | 32200 | 29600 | 22800 | 36200 | 32600 | 34400 | 27000 | 29800 | 858.5 | 1714.9 | 2 | 0.0134 | 7.809 |

|                                                                             |                                                                                                                                           |                    |     |      |          |     |        |       |       |       |       |       |       |       |       |       |       |       |       |       |       |       |        |   |        |       |
|-----------------------------------------------------------------------------|-------------------------------------------------------------------------------------------------------------------------------------------|--------------------|-----|------|----------|-----|--------|-------|-------|-------|-------|-------|-------|-------|-------|-------|-------|-------|-------|-------|-------|-------|--------|---|--------|-------|
| Peptidyl-prolyl cis-trans isomerase A<br>OS=Bos taurus<br>GN=PPIA PE=1 SV=2 | sp P62935 PPIA_BOVIN,sp P62936 PPIA_PIG,tron F1MN08 F1MN08_BOVIN,tron F2Q9A3 F2Q9A3_PIG,tron F2Q9A4 F2Q9A4_PHAAF,tron Q861V5 Q861V5_BOVIN | kITIA<br>DcG<br>QI | 77% | 38.3 | 52.96066 | Ref | 0.0039 | -0.36 | 0.15  | -0.21 | 0.16  | -0.42 | -0.1  | 62800 | 54700 | 46100 | 73500 | 63200 | 71400 | 50000 | 61800 | 572.7 | 1714.9 | 3 | 0.0126 | 7.352 |
| Peptidyl-prolyl cis-trans isomerase A<br>OS=Bos taurus<br>GN=PPIA PE=1 SV=2 | sp P62935 PPIA_BOVIN,sp P62936 PPIA_PIG,tron F1MN08 F1MN08_BOVIN,tron F2Q9A3 F2Q9A3_PIG,tron F2Q9A4 F2Q9A4_PHAAF,tron Q861V5 Q861V5_BOVIN | kITIA<br>DcG<br>QI | 55% | 32.9 | 52.98359 | Ref | 0.065  | -0.21 | -0.05 | -0.12 | -0.15 | -0.22 | 0.027 | 3580  | 3350  | 3000  | 3750  | 3960  | 3390  | 3360  | 3960  | 858.5 | 1715   | 2 | 0.0056 | 3.263 |
| Peptidyl-prolyl cis-trans isomerase A<br>OS=Bos taurus<br>GN=PPIA PE=1 SV=2 | sp P62935 PPIA_BOVIN,sp P62936 PPIA_PIG,tron F1MN08 F1MN08_BOVIN,tron F2Q9A3 F2Q9A3_PIG,tron F2Q9A4 F2Q9A4_PHAAF,tron Q861V5 Q861V5_BOVIN | kITIA<br>DcG<br>QI | 87% | 41.1 | 53.04089 | Ref | -0.037 | -0.36 | 0.12  | -0.11 | 0.11  | -0.32 | -0.14 | 20100 | 17100 | 14800 | 23300 | 21900 | 22300 | 17300 | 19300 | 858.5 | 1714.9 | 2 | 0.0168 | 9.802 |

|                                                                             |                                                                                                                                           |                    |     |      |          |     |       |       |       |        |       |       |       |      |      |      |      |      |      |      |      |       |        |   |       |       |
|-----------------------------------------------------------------------------|-------------------------------------------------------------------------------------------------------------------------------------------|--------------------|-----|------|----------|-----|-------|-------|-------|--------|-------|-------|-------|------|------|------|------|------|------|------|------|-------|--------|---|-------|-------|
| Peptidyl-prolyl cis-trans isomerase A<br>OS=Bos taurus<br>GN=PPIA PE=1 SV=2 | sp P62935 PPIA_BOVIN,sp P62936 PPIA_PIG,tron F1MN08 F1MN08_BOVIN,tron F2Q9A3 F2Q9A3_PIG,tron F2Q9A4 F2Q9A4_PHAAF,tron Q861V5 Q861V5_BOVIN | kITIA<br>DcG<br>QI | 83% | 39.5 | 52.97566 | Ref | 0.015 | -0.41 | 0.13  | -0.058 | 0.18  | -0.25 | -0.09 | 576  | 626  | 507  | 827  | 798  | 824  | 637  | 709  | 858.5 | 1714.9 | 2 | 0.013 | 7.599 |
| Peptidyl-prolyl cis-trans isomerase A<br>OS=Bos taurus<br>GN=PPIA PE=1 SV=2 | sp P62935 PPIA_BOVIN,sp P62936 PPIA_PIG,tron F1MN08 F1MN08_BOVIN,tron F2Q9A3 F2Q9A3_PIG,tron F2Q9A4 F2Q9A4_PHAAF,tron Q861V5 Q861V5_BOVIN | kITIA<br>DcG<br>QI | 63% | 34.6 | 53.01271 | Ref | 0.04  | -0.12 | -0.07 | -0.12  | -0.17 | -0.13 | -0.09 | 2320 | 2110 | 2050 | 2370 | 2530 | 2140 | 2300 | 2350 | 572.7 | 1715   | 3 | 0.006 | 3.523 |
| Peptidyl-prolyl cis-trans isomerase A<br>OS=Bos taurus<br>GN=PPIA PE=1 SV=2 | sp P62935 PPIA_BOVIN,sp P62936 PPIA_PIG,tron F1MN08 F1MN08_BOVIN,tron F2Q9A3 F2Q9A3_PIG,tron F2Q9A4 F2Q9A4_PHAAF,tron Q861V5 Q861V5_BOVIN | kITIA<br>DcG<br>QI | 74% | 36.6 | 52.97022 | Ref | 0.55  | -0.68 | 0.065 | -0.27  | -0.08 | -0.7  | -0.58 | 1760 | 1650 | 763  | 1440 | 1260 | 1250 | 851  | 916  | 859   | 1715.9 | 2 | 0.01  | 5.817 |

|                                                                             |                                                                                                                                               |                                    |     |      |          |     |       |                        |       |       |       |       |       |       |       |                        |        |       |       |       |       |       |        |   |        |       |
|-----------------------------------------------------------------------------|-----------------------------------------------------------------------------------------------------------------------------------------------|------------------------------------|-----|------|----------|-----|-------|------------------------|-------|-------|-------|-------|-------|-------|-------|------------------------|--------|-------|-------|-------|-------|-------|--------|---|--------|-------|
| Peptidyl-prolyl cis-trans isomerase A<br>OS=Bos taurus<br>GN=PPIA PE=1 SV=2 | sp P62935 PPIA_BOVIN,sp P62936 PPIA_PIG,trans F1MN08 F1MN08_BOVIN,trans F2Q9A3 F2Q9A3_PIG,trans F2Q9A4 F2Q9A4_PHAAF,trans Q861V5 Q861V5_BOVIN | tEWL<br>DGk                        | 53% | 31.9 | 52.26528 | Ref | 0.029 | -0.48                  | 0.26  | -0.15 | 0.006 | -0.26 | -0.18 | 81900 | 73300 | 56000                  | 105000 | 86700 | 84500 | 73400 | 76800 | 728.9 | 1455.8 | 2 | 0.0089 | 6.098 |
| Peptidyl-prolyl cis-trans isomerase A<br>OS=Bos taurus<br>GN=PPIA PE=1 SV=2 | sp P62935 PPIA_BOVIN,sp P62936 PPIA_PIG,trans F1MN08 F1MN08_BOVIN,trans F2Q9A3 F2Q9A3_PIG,trans F2Q9A4 F2Q9A4_PHAAF,trans Q861V5 Q861V5_BOVIN | vkEG<br>MNI<br>VEA<br>MER          | 81% | 38.8 | 54.23726 | Ref | 0.14  | -0.5                   | 0.16  | -0.34 | -0.06 | -0.3  | -0.19 | 4510  | 3640  | 2540                   | 4500   | 3510  | 3720  | 3290  | 3530  | 529.3 | 2113.1 | 4 | 0.0141 | 6.647 |
| Peptidyl-prolyl cis-trans isomerase A<br>OS=Bos taurus<br>GN=PPIA PE=1 SV=2 | sp P62935 PPIA_BOVIN,sp P62936 PPIA_PIG,trans F1MN08 F1MN08_BOVIN,trans F2Q9A3 F2Q9A3_PIG,trans F2Q9A4 F2Q9A4_PHAAF,trans Q861V5 Q861V5_BOVIN | vNPT<br>VFFD<br>IAVD<br>GEPL<br>GR | 95% | 69.6 | 54.556   | Ref | 0.42  | Value Missing (-1.303) | 0.049 | -0.17 | -0.19 | 0.07  | -0.1  | 2430  | 2790  | Value Missing (-1.303) | 2620   | 2470  | 2140  | 2670  | 2360  | 750.7 | 2249.2 | 3 | 0.0112 | 4.982 |

|                                                                             |                                                                                                               |                              |    |     |      |          |     |      |       |       |       |      |       |       |      |      |      |      |      |      |      |      |       |        |   |        |       |
|-----------------------------------------------------------------------------|---------------------------------------------------------------------------------------------------------------|------------------------------|----|-----|------|----------|-----|------|-------|-------|-------|------|-------|-------|------|------|------|------|------|------|------|------|-------|--------|---|--------|-------|
| Peptidyl-prolyl cis-trans isomerase A<br>OS=Bos taurus<br>GN=PPIA PE=1 SV=2 | sp P62935 PPIA_BOVIN,sp P62936 PPIA_PIG,tron F1MN08 F1MN08_BOVIN,tron F2Q9A3 F2Q9A3_PIG,tron F2Q9A4 F2Q9A4_PH | VNPT<br>VFFD<br>IAVD<br>GEPL | GR | 95% | 74.6 | 54.54981 | Ref | 0.45 | -0.63 | 0.044 | -0.28 | 0.13 | -0.61 | 0.12  | 2510 | 3550 | 1820 | 3260 | 2860 | 3330 | 2090 | 3420 | 1126  | 2249.2 | 2 | 0.0075 | 3.349 |
| Peptidyl-prolyl cis-trans isomerase A<br>OS=Bos taurus<br>GN=PPIA PE=1 SV=2 | sp P62935 PPIA_BOVIN,sp P62936 PPIA_PIG,tron F1MN08 F1MN08_BOVIN,tron F2Q9A3 F2Q9A3_PIG,tron F2Q9A4 F2Q9A4_PH | VNPT<br>VFFD<br>IAVD<br>GEPL | GR | 95% | 66.2 | 54.53005 | Ref | 0.41 | -0.73 | -0.1  | -0.04 | 0.23 | -0.17 | 0.083 | 144  | 282  | 138  | 241  | 277  | 291  | 230  | 273  | 1126  | 2249.2 | 2 | 0.0158 | 7.037 |
| Peptidyl-prolyl cis-trans isomerase A<br>OS=Bos taurus<br>GN=PPIA PE=1 SV=2 | sp P62935 PPIA_BOVIN,sp P62936 PPIA_PIG,tron F1MN08 F1MN08_BOVIN,tron F2Q9A3 F2Q9A3_PIG,tron F2Q9A4 F2Q9A4_PH | VNPT<br>VFFD<br>IAVD<br>GEPL | GR | 95% | 62   | 54.55037 | Ref | 0.32 | -0.29 | 0.032 | -0.54 | 0.15 | -0.19 | -0.54 | 303  | 301  | 214  | 300  | 222  | 314  | 259  | 202  | 750.7 | 2249.2 | 3 | 0.0136 | 6.049 |

|                                                                             |                                                                                                                                    |                              |    |     |      |          |     |       |       |       |       |       |                            |       |     |     |     |     |     |     |                            |     |       |        |   |        |       |
|-----------------------------------------------------------------------------|------------------------------------------------------------------------------------------------------------------------------------|------------------------------|----|-----|------|----------|-----|-------|-------|-------|-------|-------|----------------------------|-------|-----|-----|-----|-----|-----|-----|----------------------------|-----|-------|--------|---|--------|-------|
| Peptidyl-prolyl cis-trans isomerase A<br>OS=Bos taurus<br>GN=PPIA PE=1 SV=2 | sp P62935 PPIA_BOVIN,sp P62936 PPIA_PIG,tron F1MN08 F1MN08_BOVIN,tron F2Q9A3 F2Q9A3_PIG,tron F2Q9A4 F2Q9A4_PHAAF,tron Q861V5_BOVIN | VNPT<br>VFFD<br>IAVD<br>GEPL | GR | 95% | 59.7 | 54.57341 | Ref | 0.14  | 0.16  | -0.19 | 0.013 | -0.2  | 0.15                       | -0.73 | 167 | 184 | 202 | 178 | 226 | 171 | 228                        | 122 | 750.7 | 2249.2 | 3 | 0.011  | 4.902 |
| Peptidyl-prolyl cis-trans isomerase A<br>OS=Bos taurus<br>GN=PPIA PE=1 SV=2 | sp P62935 PPIA_BOVIN,sp P62936 PPIA_PIG,tron F1MN08 F1MN08_BOVIN,tron F2Q9A3 F2Q9A3_PIG,tron F2Q9A4 F2Q9A4_PHAAF,tron Q861V5_BOVIN | VNPT<br>VFFD<br>IAVD<br>GEPL | GR | 95% | 59.6 | 54.54981 | Ref | -0.33 | -0.38 | -0.13 | 0.037 | 0.001 | -0.69                      | 0.69  | 474 | 401 | 422 | 561 | 695 | 592 | 383                        | 988 | 750.7 | 2249.2 | 3 | 0.0076 | 3.356 |
| Peptidyl-prolyl cis-trans isomerase A<br>OS=Bos taurus<br>GN=PPIA PE=1 SV=2 | sp P62935 PPIA_BOVIN,sp P62936 PPIA_PIG,tron F1MN08 F1MN08_BOVIN,tron F2Q9A3 F2Q9A3_PIG,tron F2Q9A4 F2Q9A4_PHAAF,tron Q861V5_BOVIN | VNPT<br>VFFD<br>IAVD<br>GEPL | GR | 95% | 58.7 | 54.56849 | Ref | -0.12 | -0.28 | -0.28 | -0.45 | 0.15  | Value Missing (-0.9248733) | 0.8   | 275 | 251 | 243 | 272 | 267 | 352 | Value Missing (-0.9248733) | 573 | 750.7 | 2249.2 | 3 | 0.0085 | 3.769 |

|                                                                       |                                                                                                                                    |                    |     |      |          |     |                         |                            |                               |                                |                                |                        |                         |                        |                         |                            |                               |                                |                                |                        |                         |       |        |   |        |       |
|-----------------------------------------------------------------------|------------------------------------------------------------------------------------------------------------------------------------|--------------------|-----|------|----------|-----|-------------------------|----------------------------|-------------------------------|--------------------------------|--------------------------------|------------------------|-------------------------|------------------------|-------------------------|----------------------------|-------------------------------|--------------------------------|--------------------------------|------------------------|-------------------------|-------|--------|---|--------|-------|
| Peptidyl-prolyl cis-trans isomerase A OS=Bos taurus GN=PPIA PE=1 SV=2 | sp P62935 PPIA_BOVIN,sp P62936 PPIA_PIG,tron F1MN08 F1MN08_BOVIN,tron F2Q9A3 F2Q9A3_PIG,tron F2Q9A4 F2Q9A4_PHAAF,tron Q861V5_BOVIN | VNPTVFFDIADVGEPLGR | 95% | 63.4 | 54.54697 | Ref | -0.18                   | Value Missing (-0.5912971) | -0.56                         | -0.4                           | 0.31                           | -0.05                  | 0.67                    | 130                    | 130                     | Value Missing (-0.5912971) | 121                           | 150                            | 214                            | 174                    | 283                     | 750.7 | 2249.2 | 3 | 0.0096 | 4.249 |
| Peptidyl-prolyl cis-trans isomerase A OS=Bos taurus GN=PPIA PE=1 SV=2 | sp P62935 PPIA_BOVIN,sp P62936 PPIA_PIG,tron F1MN08 F1MN08_BOVIN,tron F2Q9A3 F2Q9A3_PIG,tron F2Q9A4 F2Q9A4_PHAAF,tron Q861V5_BOVIN | VNPTVFFDIADVGEPLGR | 95% | 67.2 | 54.55296 | Ref | No Values (-0.35357106) | No Values (-0.4712644)     | Reference Missing (0.6258415) | Reference Missing (0.31834987) | Reference Missing (0.36871627) | No Values (-0.6452326) | No Values (-0.63435876) | No Values (-0.5559613) | No Values (-0.35357106) | No Values (-0.4712644)     | Reference Missing (0.6258415) | Reference Missing (0.31834987) | Reference Missing (0.36871627) | No Values (-0.6452326) | No Values (-0.63435876) | 750.7 | 2249.2 | 3 | 0.0109 | 4.822 |
| Peptidyl-prolyl cis-trans isomerase A OS=Bos taurus GN=PPIA PE=1 SV=2 | sp P62935 PPIA_BOVIN,sp P62936 PPIA_PIG,tron F1MN08 F1MN08_BOVIN,tron F2Q9A3 F2Q9A3_PIG,tron F2Q9A4 F2Q9A4_PHAAF,tron Q861V5_BOVIN | VSFELFADK          | 90% | 42.5 | 52.60265 | Ref | 0.12                    | -0.31                      | 0.07                          | -0.16                          | 0.023                          | -0.28                  | -0.31                   | 66200                  | 59000                   | 47300                      | 69200                         | 65100                          | 64500                          | 54600                  | 53200                   | 832.5 | 1662.9 | 2 | 0.0126 | 7.547 |

|                                                                             |                                                                                                                                           |              |     |      |          |     |      |       |       |       |       |       |       |       |       |      |       |       |       |       |      |       |        |   |        |       |
|-----------------------------------------------------------------------------|-------------------------------------------------------------------------------------------------------------------------------------------|--------------|-----|------|----------|-----|------|-------|-------|-------|-------|-------|-------|-------|-------|------|-------|-------|-------|-------|------|-------|--------|---|--------|-------|
| Peptidyl-prolyl cis-trans isomerase A<br>OS=Bos taurus<br>GN=PPIA PE=1 SV=2 | sp P62935 PPIA_BOVIN,sp P62936 PPIA_PIG,tron F1MN08 F1MN08_BOVIN,tron F2Q9A3 F2Q9A3_PIG,tron F2Q9A4 F2Q9A4_PHAAF,tron Q861V5 Q861V5_BOVIN | vSFE<br>LFAD | 94% | 46   | 52.61037 | Ref | 0.31 | -0.33 | -0.08 | -0.2  | -0.11 | -0.33 | -0.17 | 11300 | 11300 | 7850 | 10500 | 10600 | 9820  | 8810  | 9790 | 832.5 | 1662.9 | 2 | 0.0078 | 4.686 |
| Peptidyl-prolyl cis-trans isomerase A<br>OS=Bos taurus<br>GN=PPIA PE=1 SV=2 | sp P62935 PPIA_BOVIN,sp P62936 PPIA_PIG,tron F1MN08 F1MN08_BOVIN,tron F2Q9A3 F2Q9A3_PIG,tron F2Q9A4 F2Q9A4_PHAAF,tron Q861V5 Q861V5_BOVIN | vSFE<br>LFAD | 90% | 42.7 | 52.61938 | Ref | 0.21 | -0.23 | 0.055 | -0.18 | -0.05 | -0.32 | -0.32 | 12500 | 11800 | 9480 | 13000 | 12100 | 11600 | 10100 | 9950 | 832.5 | 1662.9 | 2 | 0.0089 | 5.335 |
| Peptidyl-prolyl cis-trans isomerase A<br>OS=Bos taurus<br>GN=PPIA PE=1 SV=2 | sp P62935 PPIA_BOVIN,sp P62936 PPIA_PIG,tron F1MN08 F1MN08_BOVIN,tron F2Q9A3 F2Q9A3_PIG,tron F2Q9A4 F2Q9A4_PHAAF,tron Q861V5 Q861V5_BOVIN | vSFE<br>LFAD | 92% | 43.8 | 52.58309 | Ref | 0.11 | -0.4  | 0.041 | -0.2  | -0    | -0.22 | -0.23 | 1220  | 1040  | 789  | 1200  | 1120  | 1120  | 1010  | 996  | 832.5 | 1662.9 | 2 | 0.0094 | 5.636 |



|                                                                             |                                                                                                                                               |                                 |     |      |          |     |       |       |      |        |       |       |      |       |       |       |       |       |       |       |       |       |        |   |        |       |
|-----------------------------------------------------------------------------|-----------------------------------------------------------------------------------------------------------------------------------------------|---------------------------------|-----|------|----------|-----|-------|-------|------|--------|-------|-------|------|-------|-------|-------|-------|-------|-------|-------|-------|-------|--------|---|--------|-------|
| Peptidyl-prolyl cis-trans isomerase A<br>OS=Bos taurus<br>GN=PPIA PE=1 SV=2 | sp P62935 PPIA_BOVIN,sp P62936 PPIA_PIG,trans F1MN08 F1MN08_BOVIN,trans F2Q9A3 F2Q9A3_PIG,trans F2Q9A4 F2Q9A4_PHAAF,trans Q861V5 Q861V5_BOVIN | vSFE<br>LFAD<br>kVPK            | 66% | 31   | 50.7088  | Ref | -0.25 | -0.62 | 0.14 | -0.016 | 0.096 | -0.23 | 0.49 | 20700 | 23300 | 19600 | 37200 | 36800 | 34700 | 28900 | 47200 | 573.8 | 2291.4 | 4 | 0.0119 | 5.173 |
| Alpha-fetoprotein<br>OS=Bos taurus<br>GN=AFP PE=2 SV=1                      | sp Q3SZ57 FETA_BOVIN                                                                                                                          | dLcQ<br>VQG<br>VPL<br>QTM<br>k  | 74% | 38.6 | 54.38572 | Ref | 0.73  | 0.79  | 0.87 | 0.8    | 0.29  | 1.5   | 0.88 | 6930  | 8700  | 9820  | 11600 | 12200 | 7480  | 18100 | 11700 | 738.7 | 2213.2 | 3 | 0.0213 | 9.638 |
| Alpha-fetoprotein<br>OS=Bos taurus<br>GN=AFP PE=2 SV=1                      | sp Q3SZ57 FETA_BOVIN                                                                                                                          | dLcQ<br>VQG<br>VPL<br>QTM<br>k  | 83% | 42   | 54.36705 | Ref | 0.72  | 0.63  | 0.89 | 1      | -0.23 | 1.8   | 0.68 | 13700 | 18200 | 18500 | 25000 | 30000 | 11100 | 45600 | 21500 | 738.7 | 2213.2 | 3 | 0.0204 | 9.231 |
| Alpha-fetoprotein<br>OS=Bos taurus<br>GN=AFP PE=2 SV=1                      | sp Q3SZ57 FETA_BOVIN                                                                                                                          | dVLT<br>IIEkP<br>TGSK           | 65% | 30.3 | 48.32113 | Ref | 0.58  | 0.87  | 0.96 | 0.87   | 0.4   | 1.5   | 0.69 | 5600  | 6380  | 8450  | 10200 | 10500 | 6600  | 14800 | 8360  | 771.8 | 2312.4 | 3 | 0.0049 | 2.134 |
| Alpha-fetoprotein<br>OS=Bos taurus<br>GN=AFP PE=2 SV=1                      | sp Q3SZ57 FETA_BOVIN                                                                                                                          | eSSL<br>LNQ<br>HicA<br>VMG<br>k | 89% | 45.5 | 54.36015 | Ref | 0.49  | 0.61  | 0.92 | 0.91   | 0.31  | 1.6   | 1    | 5440  | 6690  | 7900  | 11000 | 12100 | 6920  | 17900 | 11600 | 762.1 | 2283.2 | 3 | 0.0219 | 9.588 |

|                                                        |                      |                                 |     |      |          |     |      |      |      |      |       |     |      |       |       |       |       |       |       |       |       |       |        |   |        |       |
|--------------------------------------------------------|----------------------|---------------------------------|-----|------|----------|-----|------|------|------|------|-------|-----|------|-------|-------|-------|-------|-------|-------|-------|-------|-------|--------|---|--------|-------|
| Alpha-fetoprotein<br>OS=Bos taurus<br>GN=AFP PE=2 SV=1 | sp Q3SZ57 FETA_BOVIN | eSSL<br>LNQ<br>HicA<br>VMG<br>k | 87% | 44.1 | 54.37208 | Ref | 0.82 | 0.75 | 0.77 | 0.95 | 0.49  | 1.4 | 0.69 | 1070  | 1300  | 1350  | 1530  | 1920  | 1210  | 2380  | 1450  | 762.1 | 2283.2 | 3 | 0.0228 | 9.982 |
| Alpha-fetoprotein<br>OS=Bos taurus<br>GN=AFP PE=2 SV=1 | sp Q3SZ57 FETA_BOVIN | eSSL<br>LNQ<br>HicA<br>VMG<br>k | 88% | 45.3 | 54.46677 | Ref | 0.62 | 0.73 | 0.89 | 0.99 | 0.34  | 1.6 | 0.85 | 1430  | 2120  | 2470  | 3110  | 3680  | 2040  | 5040  | 3010  | 762.1 | 2283.2 | 3 | 0.0151 | 6.62  |
| Alpha-fetoprotein<br>OS=Bos taurus<br>GN=AFP PE=2 SV=1 | sp Q3SZ57 FETA_BOVIN | eSSL<br>LNQ<br>HicA<br>VmG<br>k | 78% | 39.7 | 54.16504 | Ref | 0.82 | 0.88 | 0.86 | 0.82 | 0.53  | 1.3 | 0.85 | 2050  | 2890  | 3260  | 3610  | 3870  | 2760  | 4990  | 3570  | 767.4 | 2299.2 | 3 | 0.0243 | 10.58 |
| Alpha-fetoprotein<br>OS=Bos taurus<br>GN=AFP PE=2 SV=1 | sp Q3SZ57 FETA_BOVIN | gNVL<br>EcLQ<br>DGE<br>R        | 73% | 33.5 | 50.08455 | Ref | 0.79 | 0.66 | 0.85 | 0.77 | 0.069 | 1.8 | 0.71 | 8140  | 11400 | 11300 | 14500 | 15100 | 8110  | 27700 | 13100 | 841.9 | 1681.8 | 2 | 0.0096 | 5.712 |
| Alpha-fetoprotein<br>OS=Bos taurus<br>GN=AFP PE=2 SV=1 | sp Q3SZ57 FETA_BOVIN | gNVL<br>EcLQ<br>DGE<br>R        | 65% | 31.5 | 49.90192 | Ref | 0.76 | 0.78 | 0.8  | 0.92 | 0.24  | 1.6 | 0.72 | 1850  | 2700  | 2960  | 3380  | 4040  | 2200  | 6070  | 3180  | 841.9 | 1681.8 | 2 | 0.0138 | 8.184 |
| Alpha-fetoprotein<br>OS=Bos taurus<br>GN=AFP PE=2 SV=1 | sp Q3SZ57 FETA_BOVIN | gYQE<br>LLEk                    | 95% | 49.2 | 52.15614 | Ref | 0.29 | 0.66 | 0.92 | 1    | 0.21  | 1.7 | 0.97 | 24800 | 30800 | 43200 | 58100 | 68900 | 34300 | 1E+05 | 60100 | 794.5 | 1586.9 | 2 | 0.0183 | 11.52 |

|                                                        |                      |                                    |     |      |          |     |      |      |      |      |      |     |      |       |       |       |       |       |       |       |       |       |        |   |        |       |
|--------------------------------------------------------|----------------------|------------------------------------|-----|------|----------|-----|------|------|------|------|------|-----|------|-------|-------|-------|-------|-------|-------|-------|-------|-------|--------|---|--------|-------|
| Alpha-fetoprotein<br>OS=Bos taurus<br>GN=AFP PE=2 SV=1 | sp Q3SZ57 FETA_BOVIN | gYQELLEK                           | 95% | 48.9 | 52.30572 | Ref | 0.46 | 0.56 | 0.86 | 0.92 | 0.2  | 1.8 | 0.96 | 5040  | 7090  | 8210  | 11400 | 13100 | 6920  | 21900 | 12200 | 794.5 | 1586.9 | 2 | 0.025  | 15.75 |
| Alpha-fetoprotein<br>OS=Bos taurus<br>GN=AFP PE=2 SV=1 | sp Q3SZ57 FETA_BOVIN | gYQELLEK                           | 67% | 34.6 | 52.16665 | Ref | 0.28 | 0.55 | 0.99 | 1.1  | 0.14 | 1.8 | 0.85 | 11300 | 15600 | 20500 | 31100 | 36600 | 16700 | 55900 | 28200 | 530   | 1586.9 | 3 | 0.0175 | 10.99 |
| Alpha-fetoprotein<br>OS=Bos taurus<br>GN=AFP PE=2 SV=1 | sp Q3SZ57 FETA_BOVIN | hPVL<br>YAPT<br>ILSV<br>ANQ<br>YNk | 78% | 37.1 | 53.66459 | Ref | 0.85 | 0.83 | 0.81 | 0.82 | 0.35 | 1.3 | 0.88 | 1170  | 1440  | 1550  | 1710  | 1910  | 1200  | 2480  | 1790  | 659.9 | 2635.5 | 4 | 0.016  | 6.071 |
| Alpha-fetoprotein<br>OS=Bos taurus<br>GN=AFP PE=2 SV=1 | sp Q3SZ57 FETA_BOVIN | kAP<br>QLTS<br>PEL<br>MAL<br>TR    | 95% | 66.1 | 52.86025 | Ref | 0.31 | 0.69 | 0.88 | 1.1  | 0.32 | 1.7 | 0.83 | 7620  | 10400 | 14700 | 18700 | 24900 | 12300 | 33700 | 18100 | 755.4 | 2263.3 | 3 | 0.0209 | 9.214 |
| Alpha-fetoprotein<br>OS=Bos taurus<br>GN=AFP PE=2 SV=1 | sp Q3SZ57 FETA_BOVIN | kAP<br>QLTS<br>PEL<br>MAL<br>TR    | 85% | 39.3 | 52.84036 | Ref | 0.81 | 0.58 | 0.95 | 0.8  | 0.84 | 1.1 | 0.85 | 3750  | 4280  | 3960  | 5730  | 5690  | 5130  | 6440  | 5340  | 566.8 | 2263.3 | 4 | 0.0201 | 8.894 |
| Alpha-fetoprotein<br>OS=Bos taurus<br>GN=AFP PE=2 SV=1 | sp Q3SZ57 FETA_BOVIN | kAP<br>QLTS<br>PEL<br>MAL<br>TR    | 95% | 61.6 | 52.63821 | Ref | 0.57 | 0.79 | 0.91 | 0.9  | 0.41 | 1.6 | 0.86 | 2480  | 3620  | 4570  | 5570  | 6100  | 3780  | 8980  | 5350  | 755.4 | 2263.3 | 3 | 0.0143 | 6.299 |

|                                                        |                      |                                  |     |      |          |     |      |      |      |      |       |     |      |      |       |       |       |       |      |       |       |       |        |   |        |       |
|--------------------------------------------------------|----------------------|----------------------------------|-----|------|----------|-----|------|------|------|------|-------|-----|------|------|-------|-------|-------|-------|------|-------|-------|-------|--------|---|--------|-------|
| Alpha-fetoprotein<br>OS=Bos taurus<br>GN=AFP PE=2 SV=1 | sp Q3SZ57 FETA_BOVIN | kAP<br>QLTS<br>PEL<br>MAL<br>TR  | 68% | 35.3 | 52.51266 | Ref | 0.5  | 0.83 | 0.91 | 0.9  | 0.32  | 1.6 | 0.82 | 3610 | 4560  | 6210  | 7380  | 8080  | 4700 | 12100 | 6890  | 755.4 | 2263.3 | 3 | 0.0114 | 5.014 |
| Alpha-fetoprotein<br>OS=Bos taurus<br>GN=AFP PE=2 SV=1 | sp Q3SZ57 FETA_BOVIN | IAVPI<br>ILR                     | 55% | 16.9 | 36.93199 | Ref | 0.62 | 0.75 | 0.96 | 0.96 | 0.086 | 1.6 | 0.86 | 8070 | 11900 | 14000 | 18200 | 20100 | 9600 | 29500 | 17000 | 599.9 | 1197.8 | 2 | 0.0077 | 6.398 |
| Alpha-fetoprotein<br>OS=Bos taurus<br>GN=AFP PE=2 SV=1 | sp Q3SZ57 FETA_BOVIN | IAVPI<br>ILR                     | 94% | 34.1 | 36.03253 | Ref | 0.46 | 0.86 | 0.97 | 0.88 | -0.21 | 1.8 | 1    | 695  | 1130  | 1620  | 1970  | 2040  | 833  | 3400  | 2040  | 400.3 | 1197.8 | 3 | 0.0019 | 1.573 |
| Alpha-fetoprotein<br>OS=Bos taurus<br>GN=AFP PE=2 SV=1 | sp Q3SZ57 FETA_BOVIN | IAVPI<br>ILR                     | 92% | 34   | 40.04579 | Ref | 0.41 | 0.6  | 1.1  | 1    | 0.026 | 1.8 | 0.8  | 1530 | 2260  | 2800  | 4380  | 4710  | 2030 | 7130  | 3610  | 400.3 | 1197.8 | 3 | 0.0129 | 10.73 |
| Alpha-fetoprotein<br>OS=Bos taurus<br>GN=AFP PE=2 SV=1 | sp Q3SZ57 FETA_BOVIN | IGEY<br>YLQ<br>NAFL<br>VAYT<br>k | 91% | 47.4 | 54.70852 | Ref | 0.6  | 0.5  | 0.83 | 0.71 | 0.46  | 1.8 | 0.88 | 190  | 286   | 289   | 409   | 412   | 304  | 817   | 420   | 834.5 | 2500.4 | 3 | 0.0313 | 12.49 |
| Alpha-fetoprotein<br>OS=Bos taurus<br>GN=AFP PE=2 SV=1 | sp Q3SZ57 FETA_BOVIN | IVM<br>DVA<br>HIHE<br>Ecck       | 89% | 43.6 | 52.48402 | Ref | 0.62 | 0.68 | 0.96 | 1    | 0.3   | 1.6 | 0.84 | 552  | 855   | 963   | 1310  | 1520  | 800  | 2030  | 1210  | 776.4 | 2326.1 | 3 | 0.0083 | 3.566 |

|                                                        |                      |                            |     |      |          |     |      |      |      |      |      |     |      |      |      |      |      |      |      |      |      |       |        |   |        |       |
|--------------------------------------------------------|----------------------|----------------------------|-----|------|----------|-----|------|------|------|------|------|-----|------|------|------|------|------|------|------|------|------|-------|--------|---|--------|-------|
| Alpha-fetoprotein<br>OS=Bos taurus<br>GN=AFP PE=2 SV=1 | sp Q3SZ57 FETA_BOVIN | Ivm<br>DVA<br>HIHE<br>Eckc | 89% | 41.2 | 52.30191 | Ref | 0.57 | 0.89 | 0.83 | 0.82 | 0.36 | 1.5 | 0.83 | 1490 | 1680 | 2290 | 2450 | 2690 | 1710 | 4040 | 2440 | 586.5 | 2342.1 | 4 | 0.0062 | 2.651 |
| Alpha-fetoprotein<br>OS=Bos taurus<br>GN=AFP PE=2 SV=1 | sp Q3SZ57 FETA_BOVIN | qQFL<br>INLV<br>k          | 63% | 32.3 | 50.91252 | Ref | 0.76 | 0.6  | 0.85 | 0.83 | 0.32 | 1.2 | 1    | 294  | 275  | 267  | 355  | 386  | 237  | 468  | 396  | 695.4 | 1388.8 | 2 | 0.008  | 5.785 |
| Alpha-fetoprotein<br>OS=Bos taurus<br>GN=AFP PE=2 SV=1 | sp Q3SZ57 FETA_BOVIN | qQFL<br>INLV<br>k          | 95% | 59.7 | 48.85571 | Ref | 0.37 | 0.74 | 0.95 | 0.98 | 0.24 | 1.7 | 0.92 | 1860 | 2450 | 3430 | 4480 | 5040 | 2620 | 7440 | 4370 | 856   | 1710.1 | 2 | 0.0149 | 8.693 |
| Alpha-fetoprotein<br>OS=Bos taurus<br>GN=AFP PE=2 SV=1 | sp Q3SZ57 FETA_BOVIN | qQFL<br>INLV<br>k          | 56% | 29   | 48.62083 | Ref | 0.81 | 0.65 | 0.73 | 0.66 | 0.44 | 1.1 | 0.69 | 4160 | 2700 | 2630 | 3110 | 3280 | 2460 | 4020 | 3030 | 571   | 1710.1 | 3 | 0.0121 | 7.048 |
| Alpha-fetoprotein<br>OS=Bos taurus<br>GN=AFP PE=2 SV=1 | sp Q3SZ57 FETA_BOVIN | qQFL<br>INLV<br>k          | 78% | 34.5 | 48.9477  | Ref | 0.41 | 0.64 | 0.85 | 0.93 | 0.3  | 1.6 | 1.1  | 1690 | 1820 | 2320 | 3000 | 3520 | 1970 | 5050 | 3480 | 571   | 1710   | 3 | 0.0166 | 9.731 |
| Alpha-fetoprotein<br>OS=Bos taurus<br>GN=AFP PE=2 SV=1 | sp Q3SZ57 FETA_BOVIN | qQFL<br>INLV<br>k          | 64% | 30.4 | 48.61588 | Ref | 0.68 | 0.71 | 0.8  | 0.89 | 0.4  | 1.4 | 0.91 | 1470 | 1590 | 1760 | 2100 | 2480 | 1540 | 3260 | 2260 | 571   | 1710.1 | 3 | 0.0132 | 7.697 |

|                                                        |                      |                     |     |      |          |     |      |      |      |      |       |     |      |       |       |       |       |       |       |       |       |       |        |   |        |       |
|--------------------------------------------------------|----------------------|---------------------|-----|------|----------|-----|------|------|------|------|-------|-----|------|-------|-------|-------|-------|-------|-------|-------|-------|-------|--------|---|--------|-------|
| Alpha-fetoprotein<br>OS=Bos taurus<br>GN=AFP PE=2 SV=1 | sp Q3SZ57 FETA_BOVIN | qQFLINLVk           | 80% | 35.3 | 48.95754 | Ref | 0.67 | 0.72 | 0.8  | 0.67 | 0.58  | 1.3 | 0.85 | 929   | 801   | 899   | 1070  | 1070  | 884   | 1560  | 1100  | 571   | 1710   | 3 | 0.0185 | 10.8  |
| Alpha-fetoprotein<br>OS=Bos taurus<br>GN=AFP PE=2 SV=1 | sp Q3SZ57 FETA_BOVIN | rHPVLYAPTILSVANQYNk | 87% | 41.2 | 53.19081 | Ref | 0.61 | 0.65 | 0.8  | 0.84 | 0.53  | 1.5 | 1.1  | 693   | 855   | 953   | 1180  | 1340  | 949   | 1900  | 1410  | 698.9 | 2791.6 | 4 | 0.0158 | 5.643 |
| Alpha-fetoprotein<br>OS=Bos taurus<br>GN=AFP PE=2 SV=1 | sp Q3SZ57 FETA_BOVIN | rHPVLYAPTILSVANQYNk | 83% | 38.2 | 52.64719 | Ref | 0.62 | 0.59 | 1    | 0.91 | 0.36  | 1.7 | 0.88 | 979   | 1700  | 1800  | 2740  | 2790  | 1670  | 4260  | 2470  | 698.9 | 2791.6 | 4 | 0.004  | 1.446 |
| Alpha-fetoprotein<br>OS=Bos taurus<br>GN=AFP PE=2 SV=1 | sp Q3SZ57 FETA_BOVIN | rHPVLYAPTILSVANQYNk | 65% | 32.6 | 52.43601 | Ref | 0.84 | 0.62 | 0.78 | 0.98 | 0.68  | 1.3 | 0.8  | 471   | 622   | 580   | 730   | 920   | 655   | 1060  | 735   | 698.9 | 2791.6 | 4 | 0.0014 | 0.487 |
| Alpha-fetoprotein<br>OS=Bos taurus<br>GN=AFP PE=2 SV=1 | sp Q3SZ57 FETA_BOVIN | yGLSDccSR           | 72% | 25.1 | 41.95041 | Ref | 0.48 | 0.71 | 0.85 | 0.99 | 0.12  | 1.8 | 0.95 | 14400 | 22400 | 28600 | 35300 | 42900 | 20500 | 66700 | 37900 | 700.3 | 1398.6 | 2 | 0.0132 | 9.405 |
| Alpha-fetoprotein<br>OS=Bos taurus<br>GN=AFP PE=2 SV=1 | sp Q3SZ57 FETA_BOVIN | yIQESQALAk          | 95% | 56.2 | 52.78518 | Ref | 0.53 | 0.71 | 1    | 0.94 | 0.097 | 1.7 | 0.78 | 8210  | 13200 | 16200 | 22800 | 23500 | 11400 | 37400 | 19000 | 880   | 1758   | 2 | 0.0255 | 14.49 |

|                                                        |                       |                                                    |     |      |          |     |        |       |       |       |       |      |                            |       |       |       |       |       |       |       |                            |       |        |   |        |       |
|--------------------------------------------------------|-----------------------|----------------------------------------------------|-----|------|----------|-----|--------|-------|-------|-------|-------|------|----------------------------|-------|-------|-------|-------|-------|-------|-------|----------------------------|-------|--------|---|--------|-------|
| Alpha-fetoprotein<br>OS=Bos taurus<br>GN=AFP PE=2 SV=1 | sp Q3SZ57 FETA_BOVIN  | YIQE<br>SQAL<br>AK                                 | 95% | 57.3 | 52.70577 | Ref | 0.41   | 0.88  | 0.94  | 0.86  | 0.29  | 1.7  | 0.76                       | 4320  | 5700  | 8570  | 10000 | 10400 | 6140  | 17300 | 8810                       | 880   | 1758   | 2 | 0.02   | 11.37 |
| Alpha-fetoprotein<br>OS=Bos taurus<br>GN=AFP PE=2 SV=1 | sp Q3SZ57 FETA_BOVIN  | YIQE<br>SQAL<br>AK                                 | 58% | 31.1 | 52.17318 | Ref | 0.84   | 0.59  | 0.82  | 0.81  | 0.39  | 1.3  | 0.86                       | 11100 | 10900 | 9970  | 13100 | 14300 | 9410  | 18500 | 13500                      | 516.6 | 2062.2 | 4 | 0.0266 | 12.9  |
| Serpin H1 OS=Bos taurus<br>GN=SERPINH1 PE=2 SV=1       | sp Q2KJH6 SERPH_BOVIN | aATA<br>SQA<br>k                                   | 84% | 38.4 | 51.72142 | Ref | -0.018 | 0.22  | -0.09 | -0.23 | -0.2  | 0.1  | -0.52                      | 19400 | 16500 | 21000 | 19100 | 19200 | 17000 | 22000 | 14200                      | 678.4 | 1354.8 | 2 | 0.029  | 21.4  |
| Serpin H1 OS=Bos taurus<br>GN=SERPINH1 PE=2 SV=1       | sp Q2KJH6 SERPH_BOVIN | aVAI<br>SLPk                                       | 93% | 37.3 | 44.18152 | Ref | 0.25   | -0.18 | -0.13 | -0.17 | -0.35 | 0.19 | -0.2                       | 18600 | 20600 | 16600 | 19300 | 20600 | 16000 | 24200 | 18300                      | 704   | 1405.9 | 2 | 0.0033 | 2.322 |
| Serpin H1 OS=Bos taurus<br>GN=SERPINH1 PE=2 SV=1       | sp Q2KJH6 SERPH_BOVIN | dQA<br>VENI<br>LLSP<br>VVV<br>ASSL<br>GLVS<br>LGGk | 95% | 60.8 | 49.84815 | Ref | 0.014  | -0.08 | 0.055 | -0.03 | -0.3  | 0.3  | Value Missing (-1.9946213) | 178   | 118   | 120   | 148   | 153   | 111   | 176   | Value Missing (-1.9946213) | 1059  | 3172.9 | 3 | #####  | 0.244 |
| Serpin H1 OS=Bos taurus<br>GN=SERPINH1 PE=2 SV=1       | sp Q2KJH6 SERPH_BOVIN | dQA<br>VENI<br>LLSP<br>VVV<br>ASSL<br>GLVS<br>LGGk | 95% | 71.8 | 49.73423 | Ref | 0.014  | 0.38  | -0.5  | -0.3  | 0.055 | 0.18 | -0.68                      | 157   | 143   | 201   | 122   | 155   | 172   | 196   | 107                        | 1059  | 3172.9 | 3 | 0.0011 | 0.332 |

|                                                  |                       |                                |     |      |          |     |                        |                         |                         |                         |                              |                             |                         |                         |                         |                         |                         |                              |                             |                         |       |        |        |        |        |       |
|--------------------------------------------------|-----------------------|--------------------------------|-----|------|----------|-----|------------------------|-------------------------|-------------------------|-------------------------|------------------------------|-----------------------------|-------------------------|-------------------------|-------------------------|-------------------------|-------------------------|------------------------------|-----------------------------|-------------------------|-------|--------|--------|--------|--------|-------|
| Serpin H1 OS=Bos taurus<br>GN=SERPINH1 PE=2 SV=1 | sp Q2KJH6 SERPH_BOVIN | dQAVENILLSPVVV<br>ASLLGLVSLGGk | 81% | 37.4 | 50.75919 | Ref | No Values (0.14849877) | No Values (0.030805526) | No Values (-0.13578948) | No Values (-0.27626854) | No Values (-0.0803162859612) | No Values (-0.143162858878) | No Values (-0.05389126) | No Values (-0.14849877) | No Values (0.030805526) | No Values (-0.13578948) | No Values (-0.27626854) | No Values (-0.0803162859612) | No Values (-0.143162858878) | No Values (-0.13228878) | 1059  | 3172.8 | 3      | 0.0165 | 5.207  |       |
| Serpin H1 OS=Bos taurus<br>GN=SERPINH1 PE=2 SV=1 | sp Q2KJH6 SERPH_BOVIN | dQAVENILLSPVVV<br>ASLLGLVSLGGk | 90% | 42.4 | 50.37984 | Ref | No Values (0.14849861) | No Values (0.030805526) | No Values (-0.13578929) | No Values (-0.27626854) | No Values (-0.0803162859612) | No Values (-0.143162858887) | No Values (-0.05389135) | No Values (-0.14849861) | No Values (0.030805526) | No Values (-0.13578929) | No Values (-0.27626854) | No Values (-0.0803162859612) | No Values (-0.14316285887)  | No Values (-0.13228887) | 1059  | 3172.8 | 3      | 0.0096 | 3.014  |       |
| Serpin H1 OS=Bos taurus<br>GN=SERPINH1 PE=2 SV=1 | sp Q2KJH6 SERPH_BOVIN | gVVEVTHDLQk                    | 95% | 71.2 | 52.66605 | Ref | 0.059                  | -0                      | -0.09                   | -0.28                   | -0.47                        | 0.42                        | -0.64                   | 9860                    | 8230                    | 8540                    | 9050                    | 8710                         | 6690                        | 12900                   | 6170  | 917    | 1832   | 2      | 0.015  | 8.178 |
| Serpin H1 OS=Bos taurus<br>GN=SERPINH1 PE=2 SV=1 | sp Q2KJH6 SERPH_BOVIN | gVVEVTHDLQk                    | 92% | 47.4 | 52.66045 | Ref | 0.1                    | 0.038                   | -0.18                   | -0.076                  | -0.51                        | 0.26                        | -0.57                   | 30800                   | 26400                   | 27400                   | 26400                   | 31400                        | 20300                       | 36100                   | 20200 | 611.7  | 1832   | 3      | 0.0142 | 7.751 |
| Serpin H1 OS=Bos taurus<br>GN=SERPINH1 PE=2 SV=1 | sp Q2KJH6 SERPH_BOVIN | hLAGLGLTEAIDk                  | 66% | 32.5 | 52.10856 | Ref | 0.16                   | 0.002                   | -0.14                   | -0.29                   | -0.36                        | 0.13                        | -0.36                   | 8680                    | 7690                    | 7470                    | 7600                    | 7520                         | 6280                        | 9210                    | 6520  | 487.3  | 1945.1 | 4      | 0.0161 | 8.289 |
| Serpin H1 OS=Bos taurus<br>GN=SERPINH1 PE=2 SV=1 | sp Q2KJH6 SERPH_BOVIN | hLAGLGLTEAIDk                  | 95% | 63.6 | 51.97859 | Ref | 0.3                    | 0.013                   | 0.038                   | -0.41                   | -0.31                        | 0.026                       | -0.63                   | 14500                   | 14100                   | 12500                   | 14300                   | 11600                        | 10800                       | 14300                   | 8970  | 649.4  | 1945.1 | 3      | 0.0129 | 6.611 |



|                                                  |                       |                             |     |      |          |     |       |       |       |       |       |      |       |       |       |       |       |       |       |       |       |       |        |   |        |       |
|--------------------------------------------------|-----------------------|-----------------------------|-----|------|----------|-----|-------|-------|-------|-------|-------|------|-------|-------|-------|-------|-------|-------|-------|-------|-------|-------|--------|---|--------|-------|
| Serpin H1 OS=Bos taurus<br>GN=SERPINH1 PE=2 SV=1 | sp Q2KJH6 SERPH_BOVIN | hLAG<br>LGLT<br>EAID<br>knk | 82% | 36.9 | 49.99178 | Ref | 0.046 | -0.05 | -0.13 | -0.11 | -0.44 | 0.49 | -0.37 | 4140  | 4410  | 4480  | 4760  | 5300  | 3680  | 7350  | 4010  | 831.5 | 2491.5 | 3 | 0.0113 | 4.549 |
| Serpin H1 OS=Bos taurus<br>GN=SERPINH1 PE=2 SV=1 | sp Q2KJH6 SERPH_BOVIN | IFYA<br>DHP<br>FIFL<br>VR   | 88% | 44.4 | 53.58592 | Ref | 0.058 | 0.14  | 0.023 | -0.28 | -0.6  | 0.41 | -0.49 | 2980  | 2950  | 3390  | 3510  | 3130  | 2190  | 4610  | 2450  | 648   | 1941.1 | 3 | 0.0124 | 6.4   |
| Serpin H1 OS=Bos taurus<br>GN=SERPINH1 PE=2 SV=1 | sp Q2KJH6 SERPH_BOVIN | IFYA<br>DHP<br>FIFL<br>VR   | 64% | 35.3 | 53.46953 | Ref | 0.25  | -0.01 | -0.04 | -0.46 | -0.45 | 0.46 | -0.63 | 550   | 601   | 545   | 598   | 492   | 434   | 851   | 397   | 648   | 1941.1 | 3 | 0.0071 | 3.666 |
| Serpin H1 OS=Bos taurus<br>GN=SERPINH1 PE=2 SV=1 | sp Q2KJH6 SERPH_BOVIN | IQM<br>VEM<br>PLAH<br>k     | 91% | 46.4 | 53.12626 | Ref | 0.16  | -0.12 | -0.13 | -0.27 | -0.38 | 0.21 | -0.37 | 11300 | 9760  | 8730  | 9770  | 9730  | 7870  | 12400 | 8210  | 635.7 | 1904.1 | 3 | 0.0086 | 4.536 |
| Serpin H1 OS=Bos taurus<br>GN=SERPINH1 PE=2 SV=1 | sp Q2KJH6 SERPH_BOVIN | IQM<br>VEM<br>PLAH<br>k     | 77% | 36   | 52.76368 | Ref | 0.11  | -0.07 | -0.04 | -0.1  | -0.45 | 0.18 | -0.6  | 5820  | 4860  | 4660  | 5310  | 5620  | 3860  | 6240  | 3610  | 477   | 1904.1 | 4 | 0.0044 | 2.311 |
| Serpin H1 OS=Bos taurus<br>GN=SERPINH1 PE=2 SV=1 | sp Q2KJH6 SERPH_BOVIN | IQM<br>VEM<br>PLAH<br>k     | 89% | 44.7 | 53.23372 | Ref | 0.25  | -0.11 | -0.09 | -0.27 | -0.39 | 0.2  | -0.59 | 21200 | 19300 | 16300 | 18700 | 18100 | 14500 | 22900 | 13100 | 635.7 | 1904.1 | 3 | 0.0129 | 6.757 |

|                                                  |                       |                      |     |      |          |     |       |       |       |        |       |       |       |      |      |      |      |      |      |      |      |       |        |   |        |       |
|--------------------------------------------------|-----------------------|----------------------|-----|------|----------|-----|-------|-------|-------|--------|-------|-------|-------|------|------|------|------|------|------|------|------|-------|--------|---|--------|-------|
| Serpin H1 OS=Bos taurus<br>GN=SERPINH1 PE=2 SV=1 | sp Q2KJH6 SERPH_BOVIN | IQM VEM PLAHk        | 95% | 60.3 | 53.24387 | Ref | 0.17  | -0.14 | -0.07 | -0.14  | -0.32 | 0.19  | -0.39 | 4120 | 4060 | 3530 | 4180 | 4380 | 3370 | 5010 | 3330 | 635.7 | 1904.1 | 3 | 0.0116 | 6.08  |
| Serpin H1 OS=Bos taurus<br>GN=SERPINH1 PE=2 SV=1 | sp Q2KJH6 SERPH_BOVIN | ISSLII IMP HHV EPLER | 95% | 59.9 | 53.33061 | Ref | 0.17  | -0.11 | -0.05 | -0.23  | -0.41 | 0.22  | -0.37 | 1520 | 1430 | 1280 | 1500 | 1460 | 1130 | 1820 | 1200 | 763.4 | 2287.3 | 3 | 0.0094 | 4.125 |
| Serpin H1 OS=Bos taurus<br>GN=SERPINH1 PE=2 SV=1 | sp Q2KJH6 SERPH_BOVIN | ISSLII IMP HHV EPLER | 87% | 40.8 | 53.32651 | Ref | 0.034 | -0.01 | 0.086 | -0.44  | -0.68 | 0.14  | -0.49 | 2310 | 1530 | 1620 | 1930 | 1480 | 1100 | 2010 | 1300 | 572.8 | 2287.3 | 4 | 0.0094 | 4.105 |
| Serpin H1 OS=Bos taurus<br>GN=SERPINH1 PE=2 SV=1 | sp Q2KJH6 SERPH_BOVIN | ISSLII IMP HHV EPLER | 54% | 33.2 | 53.15929 | Ref | 0.18  | -0.35 | 0.041 | -0.002 | -0.14 | -0.1  | -0.14 | 249  | 274  | 205  | 302  | 323  | 256  | 274  | 266  | 763.4 | 2287.3 | 3 | 0.0043 | 1.883 |
| Serpin H1 OS=Bos taurus<br>GN=SERPINH1 PE=2 SV=1 | sp Q2KJH6 SERPH_BOVIN | ISSLII Imp HHV EPLER | 94% | 51.6 | 53.67085 | Ref | 0.11  | -0.24 | -0.06 | -0.24  | -0.25 | 0.16  | -0.21 | 1080 | 974  | 828  | 1060 | 1030 | 891  | 1240 | 946  | 768.8 | 2303.3 | 3 | 0.0092 | 3.971 |
| Serpin H1 OS=Bos taurus<br>GN=SERPINH1 PE=2 SV=1 | sp Q2KJH6 SERPH_BOVIN | ISSLII Imp HHV EPLER | 69% | 34.7 | 53.71666 | Ref | 0.037 | -0.18 | -0.1  | 0.024  | -0.28 | 0.085 | -0.16 | 541  | 506  | 472  | 562  | 673  | 476  | 640  | 536  | 576.8 | 2303.3 | 4 | 0.0113 | 4.924 |

|                                                  |                       |                    |     |      |          |     |                        |                                |                        |                       |                                   |                        |                        |                        |                                |                        |                       |                              |                                 |                        |      |       |        |   |        |       |
|--------------------------------------------------|-----------------------|--------------------|-----|------|----------|-----|------------------------|--------------------------------|------------------------|-----------------------|-----------------------------------|------------------------|------------------------|------------------------|--------------------------------|------------------------|-----------------------|------------------------------|---------------------------------|------------------------|------|-------|--------|---|--------|-------|
| Serpin H1 OS=Bos taurus<br>GN=SERPINH1 PE=2 SV=1 | sp Q2KJH6 SERPH_BOVIN | IYGP SSVS FAED FVR | 93% | 46   | 52.95712 | Ref | 0.091                  | 0.12                           | -0.14                  | -0.053                | -0.57                             | 0.35                   | -0.31                  | 2760                   | 3150                           | 3500                   | 3280                  | 3830                         | 2340                            | 4640                   | 2900 | 989.5 | 1977   | 2 | 0.022  | 11.1  |
| Serpin H1 OS=Bos taurus<br>GN=SERPINH1 PE=2 SV=1 | sp Q2KJH6 SERPH_BOVIN | IYGP SSVS FAED FVR | 95% | 57.5 | 53.04109 | Ref | 0.081                  | 0.074                          | -0.18                  | -0.22                 | -0.36                             | 0.29                   | -0.45                  | 5400                   | 4920                           | 5310                   | 4980                  | 5370                         | 4240                            | 6960                   | 4130 | 989.5 | 1977   | 2 | 0.0188 | 9.493 |
| Serpin H1 OS=Bos taurus<br>GN=SERPINH1 PE=2 SV=1 | sp Q2KJH6 SERPH_BOVIN | sAGL AFSL YQA MAK  | 91% | 46.7 | 53.89813 | Ref | No Values (-1.1003441) | Reference Missing (0.98178023) | No Values (-1.3846321) | No Values (-1.525114) | Reference Missing (0.87586626446) | No Values (-1.3811318) | No Values (-1.3027343) | No Values (-1.1003441) | Reference Missing (0.98178023) | No Values (-1.3846321) | No Values (-1.525114) | Reference Missing (0.875446) | Reference Missing (0.845866268) | No Values (-1.3811318) |      | 689.4 | 2065.1 | 3 | 0.0159 | 7.704 |
| Serpin H1 OS=Bos taurus<br>GN=SERPINH1 PE=2 SV=1 | sp Q2KJH6 SERPH_BOVIN | sAGL AFSL YQA MAK  | 95% | 89.7 | 53.80544 | Ref | -0.23                  | 0.14                           | -0.03                  | -0.25                 | -0.44                             | 0.2                    | -0.25                  | 2160                   | 1470                           | 2070                   | 2070                  | 1960                         | 1490                            | 2430                   | 1760 | 1034  | 2065.1 | 2 | 0.006  | 2.881 |
| Serpin H1 OS=Bos taurus<br>GN=SERPINH1 PE=2 SV=1 | sp Q2KJH6 SERPH_BOVIN | sAGL AFSL YQA MAK  | 95% | 60.1 | 53.84361 | Ref | -0.16                  | 0.1                            | -0.18                  | -0.2                  | -0.34                             | 0.31                   | -0.21                  | 1600                   | 1280                           | 1660                   | 1540                  | 1670                         | 1320                            | 2160                   | 1500 | 689.4 | 2065.1 | 3 | 0.0139 | 6.731 |
| Serpin H1 OS=Bos taurus<br>GN=SERPINH1 PE=2 SV=1 | sp Q2KJH6 SERPH_BOVIN | sAGL AFSL YQA MAK  | 95% | 64.3 | 53.81323 | Ref | 0.047                  | -0.01                          | -0.24                  | -0.29                 | -0.23                             | 0.37                   | -0.35                  | 1920                   | 1770                           | 1850                   | 1760                  | 1880                         | 1720                            | 2700                   | 1640 | 689.4 | 2065.1 | 3 | 0.0115 | 5.584 |

|                                                  |                       |                            |     |      |          |     |        |       |       |        |       |      |       |       |       |       |       |       |       |       |       |       |        |   |        |       |
|--------------------------------------------------|-----------------------|----------------------------|-----|------|----------|-----|--------|-------|-------|--------|-------|------|-------|-------|-------|-------|-------|-------|-------|-------|-------|-------|--------|---|--------|-------|
| Serpin H1 OS=Bos taurus<br>GN=SERPINH1 PE=2 SV=1 | sp Q2KJH6 SERPH_BOVIN | sAGL<br>AFSL<br>YQA<br>MAK | 79% | 39.8 | 53.95391 | Ref | -0.38  | -0.14 | -0.09 | -0.041 | -0.19 | 0.43 | -0    | 374   | 319   | 408   | 477   | 542   | 426   | 687   | 504   | 689.4 | 2065.1 | 3 | 0.0223 | 10.81 |
| Serpin H1 OS=Bos taurus<br>GN=SERPINH1 PE=2 SV=1 | sp Q2KJH6 SERPH_BOVIN | sAGL<br>AFSL<br>YQA<br>mAk | 95% | 60.5 | 53.94545 | Ref | -0.039 | 0.18  | -0.26 | -0.17  | -0.41 | 0.17 | -0.19 | 10800 | 9070  | 11500 | 9480  | 11100 | 8230  | 12900 | 9910  | 694.7 | 2081.1 | 3 | 0.0183 | 8.79  |
| Serpin H1 OS=Bos taurus<br>GN=SERPINH1 PE=2 SV=1 | sp Q2KJH6 SERPH_BOVIN | sAGL<br>AFSL<br>YQA<br>mAk | 95% | 57.9 | 53.93593 | Ref | 0.077  | -0.09 | -0.32 | -0.045 | -0.18 | 0.28 | -0.15 | 957   | 1050  | 1020  | 972   | 1300  | 1030  | 1480  | 1090  | 694.7 | 2081.1 | 3 | 0.0163 | 7.825 |
| Serpin H1 OS=Bos taurus<br>GN=SERPINH1 PE=2 SV=1 | sp Q2KJH6 SERPH_BOVIN | sYTV<br>GVT<br>MM<br>HR    | 71% | 34.9 | 51.34897 | Ref | 0.055  | -0.33 | 0.19  | -0.19  | -0.27 | 0.22 | -0.09 | 24400 | 27400 | 22800 | 36700 | 31000 | 25600 | 37700 | 30100 | 529.3 | 1584.8 | 3 | 0.0095 | 5.989 |
| Serpin H1 OS=Bos taurus<br>GN=SERPINH1 PE=2 SV=1 | sp Q2KJH6 SERPH_BOVIN | sYTV<br>GVT<br>MM<br>HR    | 77% | 35.8 | 51.35034 | Ref | 0.26   | -0.07 | -0.13 | -0.33  | -0.42 | 0.29 | -0.38 | 5450  | 5630  | 4870  | 5230  | 5040  | 4120  | 7060  | 4390  | 793.4 | 1584.8 | 2 | 0.0096 | 6.061 |
| Serpin H1 OS=Bos taurus<br>GN=SERPINH1 PE=2 SV=1 | sp Q2KJH6 SERPH_BOVIN | syTV<br>GVT<br>MM<br>HR    | 66% | 33.6 | 53.28412 | Ref | 0.34   | 0.11  | -0.08 | -0.39  | -0.48 | 0.19 | -0.53 | 30700 | 34400 | 31800 | 31200 | 27800 | 22700 | 38000 | 22800 | 473.3 | 1889   | 4 | 0.0183 | 9.696 |

|                                                                      |                               |                                             |     |      |          |     |       |      |       |        |       |       |       |       |       |       |       |        |       |       |       |       |        |   |        |       |
|----------------------------------------------------------------------|-------------------------------|---------------------------------------------|-----|------|----------|-----|-------|------|-------|--------|-------|-------|-------|-------|-------|-------|-------|--------|-------|-------|-------|-------|--------|---|--------|-------|
| Serpin H1 OS=Bos<br>taurus<br>GN=SERPINH1 PE=2<br>SV=1               | sp Q2KJH<br>6 SERPH_<br>BOVIN | tGLY<br>NYY<br>DDE<br>kEk                   | 69% | 37.9 | 55.04219 | Ref | 0.2   | 0.16 | -0.25 | -0.039 | -0.63 | 0.38  | -0.81 | 11100 | 11100 | 11800 | 9980  | 12700  | 7380  | 15500 | 6740  | 850.8 | 2549.3 | 3 | 0.0185 | 7.245 |
| Collagen alpha-1(I)<br>chain OS=Bos<br>taurus GN=COL1A1<br>PE=1 SV=3 | sp P0245<br>3 CO1A1<br>_BOVIN | aDD<br>ANV<br>VR                            | 66% | 32   | 49.75721 | Ref | -0.11 | 0.24 | -0.1  | -0.3   | -0.06 | 0.046 | -0.14 | 9980  | 8370  | 11600 | 10200 | 9860   | 10200 | 11400 | 9930  | 388.5 | 1162.6 | 3 | 0.0128 | 11.02 |
| Collagen alpha-1(I)<br>chain OS=Bos<br>taurus GN=COL1A1<br>PE=1 SV=3 | sp P0245<br>3 CO1A1<br>_BOVIN | aDD<br>ANV<br>VR                            | 51% | 29   | 49.60495 | Ref | -1.9  | 1.3  | -1.8  | 0.028  | -1.9  | 1.1   | -2    | 89800 | 22300 | 2E+05 | 27300 | 111000 | 25300 | 2E+05 | 23900 | 582.3 | 1162.6 | 2 | 0.0112 | 9.627 |
| Collagen alpha-1(I)<br>chain OS=Bos<br>taurus GN=COL1A1<br>PE=1 SV=3 | sp P0245<br>3 CO1A1<br>_BOVIN | dGE<br>AGA<br>QGP<br>PGP<br>AGP<br>AGE<br>R | 50% | 30.6 | 51.18652 | Ref | 0.43  | 0.74 | -0.57 | -0.58  | -0.39 | -0.12 | -0.43 | 1690  | 2130  | 2840  | 1300  | 1410   | 1400  | 1780  | 1420  | 665.7 | 1993.9 | 3 | 0.0265 | 13.3  |
| Collagen alpha-1(I)<br>chain OS=Bos<br>taurus GN=COL1A1<br>PE=1 SV=3 | sp P0245<br>3 CO1A1<br>_BOVIN | dGE<br>AGA<br>QGP<br>PGP<br>AGP<br>AGE<br>R | 94% | 49.7 | 51.66229 | Ref | -0.16 | 0.33 | -0.3  | 0.007  | -0.22 | 0.013 | -0.15 | 9500  | 7620  | 11700 | 8450  | 11500  | 8610  | 10500 | 9360  | 665.7 | 1994   | 3 | 0.0148 | 7.433 |
| Collagen alpha-1(I)<br>chain OS=Bos<br>taurus GN=COL1A1<br>PE=1 SV=3 | sp P0245<br>3 CO1A1<br>_BOVIN | dGE<br>AGA<br>QGP<br>PGP<br>AGP<br>AGE<br>R | 95% | 90.1 | 51.71047 | Ref | -2.1  | 1.5  | -2    | -0.1   | -1.7  | 1     | -2.1  | 11500 | 2490  | 33100 | 3180  | 13500  | 3780  | 26600 | 2950  | 998   | 1994   | 2 | 0.0143 | 7.149 |

|                                                                      |                               |                                        |     |      |          |     |       |      |       |        |       |      |       |       |      |       |      |       |      |       |       |       |        |   |        |       |
|----------------------------------------------------------------------|-------------------------------|----------------------------------------|-----|------|----------|-----|-------|------|-------|--------|-------|------|-------|-------|------|-------|------|-------|------|-------|-------|-------|--------|---|--------|-------|
| Collagen alpha-1(I)<br>chain OS=Bos<br>taurus GN=COL1A1<br>PE=1 SV=3 | sp P0245<br>3 CO1A1<br>_BOVIN | eGA<br>PGA<br>EGSP<br>GR               | 90% | 42   | 50.04085 | Ref | -0.81 | 0.56 | -0.73 | -0.015 | -0.58 | 0.41 | -0.41 | 17700 | 6620 | 18600 | 8530 | 15400 | 9120 | 18900 | 10600 | 463.6 | 1387.7 | 3 | 0.0125 | 8.988 |
| Collagen alpha-1(I)<br>chain OS=Bos<br>taurus GN=COL1A1<br>PE=1 SV=3 | sp P0245<br>3 CO1A1<br>_BOVIN | gAA<br>GEP<br>GK                       | 50% | 30.9 | 51.7376  | Ref | -0.88 | 1.1  | -1.3  | -0.11  | -1.1  | 0.84 | -1.4  | 14400 | 6120 | 25600 | 5470 | 14000 | 6270 | 24600 | 5050  | 647.9 | 1293.7 | 2 | 0.0241 | 18.65 |
| Collagen alpha-1(I)<br>chain OS=Bos<br>taurus GN=COL1A1<br>PE=1 SV=3 | sp P0245<br>3 CO1A1<br>_BOVIN | gAn<br>GAP<br>GIAG<br>APG<br>FPG<br>AR | 95% | 79.7 | 53.21725 | Ref | -1.8  | 1.4  | -1.4  | -0.16  | -1.2  | 0.87 | -1.7  | 11700 | 3000 | 28600 | 4620 | 12200 | 5040 | 22700 | 3670  | 922   | 1842   | 2 | 0.0133 | 7.207 |
| Collagen alpha-1(I)<br>chain OS=Bos<br>taurus GN=COL1A1<br>PE=1 SV=3 | sp P0245<br>3 CO1A1<br>_BOVIN | gAn<br>GAP<br>GND<br>GAK               | 89% | 43.8 | 52.2627  | Ref | -1.1  | 1.2  | -1.4  | 0.003  | -1.3  | 0.82 | -1.6  | 18500 | 6720 | 35500 | 6630 | 19500 | 6950 | 31300 | 5650  | 546.6 | 1636.8 | 3 | 0.024  | 14.64 |
| Collagen alpha-1(I)<br>chain OS=Bos<br>taurus GN=COL1A1<br>PE=1 SV=3 | sp P0245<br>3 CO1A1<br>_BOVIN | gAn<br>GAP<br>GND<br>GAK               | 79% | 37.4 | 52.27257 | Ref | -1.8  | 1.4  | -2.3  | 0.025  | -2    | 1.1  | -2.6  | 4870  | 1130 | 11700 | 1020 | 5510  | 1160 | 10300 | 781   | 819.4 | 1636.8 | 2 | 0.0215 | 13.1  |
| Collagen alpha-1(I)<br>chain OS=Bos<br>taurus GN=COL1A1<br>PE=1 SV=3 | sp P0245<br>3 CO1A1<br>_BOVIN | gDk<br>GET<br>GEQ<br>GDR               | 90% | 43   | 52.72584 | Ref | -1.2  | 0.78 | -0.81 | 0.098  | -0.78 | 0.78 | -1.2  | 6580  | 2130 | 9140  | 3410 | 7030  | 3350 | 10300 | 2620  | 465   | 1855.9 | 4 | 0.0143 | 7.684 |

|                                                                      |                       |                                                             |     |      |          |     |                                       |                                           |                                           |                                           |       |                                       |       |                                          |      |                                           |      |                                       |       |        |      |        |        |   |        |       |
|----------------------------------------------------------------------|-----------------------|-------------------------------------------------------------|-----|------|----------|-----|---------------------------------------|-------------------------------------------|-------------------------------------------|-------------------------------------------|-------|---------------------------------------|-------|------------------------------------------|------|-------------------------------------------|------|---------------------------------------|-------|--------|------|--------|--------|---|--------|-------|
| Collagen alpha-1(I)<br>chain OS=Bos<br>taurus GN=COL1A1<br>PE=1 SV=3 | sp P02453 CO1A1_BOVIN | gEPG<br>PPG<br>PAG<br>AAG<br>PAG<br>NPG<br>ADG<br>QPG<br>Ak | 81% | 41.8 | 55.13622 | Ref | Value<br>Missing (-<br>1.8960<br>222) | Value<br>Missi<br>ng (-<br>2.180<br>3102) | Value<br>Missin<br>g (-<br>2.1249<br>168) | Value<br>Missin<br>g (-<br>2.1768<br>095) | 267   | Value<br>Missing (-<br>1.896022<br>2) | 626   | Value<br>Missing<br>(-<br>2.1803<br>102) | 182  | Value<br>Missi<br>ng (-<br>2.124<br>9168) | 610  | Value<br>Missing (-<br>2.176809<br>5) | 954.2 | 2859.4 | 3    | 0.0312 | 10.9   |   |        |       |
| Collagen alpha-1(I)<br>chain OS=Bos<br>taurus GN=COL1A1<br>PE=1 SV=3 | sp P02453 CO1A1_BOVIN | gEPG<br>PPG<br>PAG<br>AAG<br>PAG<br>NPG<br>ADG<br>QPG<br>Ak | 55% | 35.3 | 55.16452 | Ref | Value<br>Missing (-<br>2.1065<br>753) | Value<br>Missi<br>ng (-<br>2.390<br>8637) | Value<br>Missin<br>g (-<br>2.3354<br>702) | Value<br>Missin<br>g (-<br>2.3873<br>63)  | 2000  | Value<br>Missing (-<br>2.106575<br>3) | 9250  | Value<br>Missing<br>(-<br>2.3908<br>637) | 3130 | Value<br>Missi<br>ng (-<br>2.335<br>4702) | 7330 | Value<br>Missing (-<br>2.387363)      | 954.2 | 2859.4 | 3    | 0.0282 | 9.873  |   |        |       |
| Collagen alpha-1(I)<br>chain OS=Bos<br>taurus GN=COL1A1<br>PE=1 SV=3 | sp P02453 CO1A1_BOVIN | gEPG<br>PTGI<br>QGP<br>PGP<br>AGE<br>EGk                    | 79% | 40.6 | 54.8339  | Ref | -0.42                                 | 0.96                                      | -1                                        | -0.14                                     | -0.86 | 0.62                                  | -0.94 | 5330                                     | 3380 | 9550                                      | 2680 | 5520                                  | 2930  | 8510   | 2860 | 814.1  | 2439.3 | 3 | 0.0245 | 10.05 |
| Collagen alpha-1(I)<br>chain OS=Bos<br>taurus GN=COL1A1<br>PE=1 SV=3 | sp P02453 CO1A1_BOVIN | gEPG<br>PTGI<br>QGP<br>PGP<br>AGE<br>EGkR                   | 90% | 47.5 | 55.1129  | Ref | -1.7                                  | 1.3                                       | -2.1                                      | -0.079                                    | -1.7  | 1.1                                   | -2    | 2770                                     | 704  | 5940                                      | 651  | 2810                                  | 811   | 5630   | 687  | 866.1  | 2595.4 | 3 | 0.0251 | 9.682 |
| Collagen alpha-1(I)<br>chain OS=Bos<br>taurus GN=COL1A1<br>PE=1 SV=3 | sp P02453 CO1A1_BOVIN | gETG<br>PAG<br>PAG<br>PIGP<br>VGA<br>R                      | 95% | 68.3 | 53.59234 | Ref | -1.2                                  | 1.1                                       | -1.3                                      | -0.12                                     | -1.3  | 0.77                                  | -1.3  | 4790                                     | 1480 | 8140                                      | 1720 | 4220                                  | 1670  | 7130   | 1640 | 933    | 1864   | 2 | 0.0137 | 7.321 |
| Collagen alpha-1(I)<br>chain OS=Bos<br>taurus GN=COL1A1<br>PE=1 SV=3 | sp P02453 CO1A1_BOVIN | gFPG<br>LPGP<br>SGEP<br>Gk                                  | 86% | 41.2 | 53.61441 | Ref | -0.84                                 | 1.2                                       | -1.2                                      | -0.078                                    | -1.1  | 0.81                                  | -1.4  | 4710                                     | 2420 | 10600                                     | 2270 | 5530                                  | 2390  | 9340   | 2000 | 953    | 1904   | 2 | 0.0223 | 11.71 |

|                                                                      |                       |                                                                |     |      |          |     |       |      |                            |        |       |      |                            |       |      |       |                            |       |       |       |                            |       |        |   |        |       |
|----------------------------------------------------------------------|-----------------------|----------------------------------------------------------------|-----|------|----------|-----|-------|------|----------------------------|--------|-------|------|----------------------------|-------|------|-------|----------------------------|-------|-------|-------|----------------------------|-------|--------|---|--------|-------|
| Collagen alpha-1(I)<br>chain OS=Bos<br>taurus GN=COL1A1<br>PE=1 SV=3 | sp P02453 CO1A1_BOVIN | gFSG<br>LQG<br>PPG<br>PPGS<br>PGE<br>QGP<br>SGAS<br>GPA<br>GPR | 95% | 81.7 | 54.13789 | Ref | -0.59 | 0.69 | -0.32                      | -0.069 | -0.18 | 0.4  | -0.43                      | 1170  | 905  | 2380  | 1330                       | 1750  | 1410  | 2200  | 1230                       | 987.8 | 2960.4 | 3 | 0.0372 | 12.57 |
| Collagen alpha-1(I)<br>chain OS=Bos<br>taurus GN=COL1A1<br>PE=1 SV=3 | sp P02453 CO1A1_BOVIN | gnSG<br>EPG<br>APG<br>Sk                                       | 51% | 31.8 | 52.49453 | Ref | -2.1  | 1.6  | -2.5                       | -0.23  | -1.9  | 1.1  | Value Missing (-2.9182823) | 4220  | 834  | 11800 | 813                        | 4200  | 1140  | 9380  | Value Missing (-2.9182823) | 833.9 | 1665.9 | 2 | 0.0229 | 13.75 |
| Collagen alpha-1(I)<br>chain OS=Bos<br>taurus GN=COL1A1<br>PE=1 SV=3 | sp P02453 CO1A1_BOVIN | gPA<br>GPP<br>GR                                               | 93% | 45.6 | 49.63259 | Ref | -0.63 | 0.73 | -0.3                       | -0.25  | -0.44 | 0.52 | -0.89                      | 6350  | 3420 | 9480  | 5230                       | 5980  | 4560  | 9300  | 3470                       | 338.2 | 1011.6 | 3 | 0.0093 | 9.16  |
| Collagen alpha-1(I)<br>chain OS=Bos<br>taurus GN=COL1A1<br>PE=1 SV=3 | sp P02453 CO1A1_BOVIN | gPSG<br>PQG<br>PSGP<br>PGPk                                    | 92% | 45.8 | 53.79316 | Ref | -2.2  | 1.4  | Value Missing (-3.1089942) | 0.14   | -2.1  | 1.2  | Value Missing (-3.1054938) | 5230  | 921  | 11700 | Value Missing (-3.1089942) | 6090  | 1120  | 11300 | Value Missing (-3.1054938) | 963   | 1924   | 2 | 0.0229 | 11.91 |
| Collagen alpha-1(I)<br>chain OS=Bos<br>taurus GN=COL1A1<br>PE=1 SV=3 | sp P02453 CO1A1_BOVIN | gPSG<br>PQG<br>PSGP<br>PGPk                                    | 87% | 43.4 | 53.79356 | Ref | -0.9  | 1.1  | -0.97                      | -0.15  | -0.7  | 0.65 | -0.81                      | 18400 | 9310 | 39600 | 10800                      | 21000 | 12600 | 33500 | 12000                      | 642.4 | 1924   | 3 | 0.0223 | 11.56 |
| Collagen alpha-1(I)<br>chain OS=Bos<br>taurus GN=COL1A1<br>PE=1 SV=3 | sp P02453 CO1A1_BOVIN | gQA<br>GVM<br>GFP<br>GPK                                       | 95% | 53.9 | 53.07106 | Ref | -0.42 | 0.61 | -0.55                      | -0.014 | -0.51 | 0.4  | -0.63                      | 13600 | 8020 | 17800 | 8950                       | 14300 | 8830  | 17400 | 8470                       | 585.3 | 1753   | 3 | 0.0158 | 9.005 |



|                                                                      |                               |                                       |     |      |          |     |       |      |       |        |       |      |      |       |        |       |        |        |       |       |       |       |        |   |        |       |
|----------------------------------------------------------------------|-------------------------------|---------------------------------------|-----|------|----------|-----|-------|------|-------|--------|-------|------|------|-------|--------|-------|--------|--------|-------|-------|-------|-------|--------|---|--------|-------|
| Collagen alpha-1(I)<br>chain OS=Bos<br>taurus GN=COL1A1<br>PE=1 SV=3 | sp P0245<br>3 CO1A1<br>_BOVIN | gQA<br>GVM<br>GFP<br>GPK              | 95% | 51.1 | 52.95145 | Ref | -0.89 | 0.95 | -1.2  | 0.046  | -1    | 0.73 | -1.1 | 3140  | 1310   | 5090  | 1310   | 3350   | 1400  | 4930  | 1400  | 877.5 | 1753   | 2 | 0.0169 | 9.657 |
| Collagen alpha-1(I)<br>chain OS=Bos<br>taurus GN=COL1A1<br>PE=1 SV=3 | sp P0245<br>3 CO1A1<br>_BOVIN | gRP<br>GAP<br>GPA<br>GAR              | 87% | 41.8 | 51.6714  | Ref | -1.5  | 1.4  | -0.84 | -0.19  | -1.5  | 0.86 | -2.2 | 4E+05 | 121000 | 9E+05 | 229000 | 395000 | 1E+05 | 7E+05 | 91800 | 456.6 | 1366.8 | 3 | 0.0137 | 10.04 |
| Collagen alpha-1(I)<br>chain OS=Bos<br>taurus GN=COL1A1<br>PE=1 SV=3 | sp P0245<br>3 CO1A1<br>_BOVIN | gSAG<br>PPG<br>ATG<br>FPG<br>AAG<br>R | 95% | 80.6 | 52.57976 | Ref | -1.7  | 1.4  | -2    | -0.33  | -1.9  | 1.2  | -2.3 | 9040  | 2420   | 22500 | 2430   | 8410   | 2470  | 21500 | 2000  | 866.5 | 1730.9 | 2 | 0.0128 | 7.392 |
| Collagen alpha-1(I)<br>chain OS=Bos<br>taurus GN=COL1A1<br>PE=1 SV=3 | sp P0245<br>3 CO1A1<br>_BOVIN | gSEG<br>PQG<br>VR                     | 88% | 40   | 49.81792 | Ref | -1.3  | 1.3  | -0.64 | -0.048 | -0.78 | 0.56 | -1.9 | 8880  | 3480   | 22500 | 6600   | 11000  | 5750  | 15200 | 2830  | 397.5 | 1189.6 | 3 | 0.0097 | 8.159 |
| Collagen alpha-1(I)<br>chain OS=Bos<br>taurus GN=COL1A1<br>PE=1 SV=3 | sp P0245<br>3 CO1A1<br>_BOVIN | gVP<br>GPP<br>GAV<br>GPA<br>Gk        | 95% | 52.9 | 52.20573 | Ref | -1.2  | 1.4  | -2.1  | -0.14  | -1.6  | 1    | -2.3 | 6680  | 2800   | 18800 | 1870   | 7810   | 2410  | 15700 | 1570  | 885   | 1768   | 2 | 0.0199 | 11.24 |
| Collagen alpha-1(I)<br>chain OS=Bos<br>taurus GN=COL1A1<br>PE=1 SV=3 | sp P0245<br>3 CO1A1<br>_BOVIN | gVQ<br>GPP<br>GPA<br>GPR              | 76% | 36.4 | 52.28662 | Ref | -1.1  | 1.3  | -1.5  | -0.07  | -1    | 0.93 | -1.8 | 19300 | 8750   | 48500 | 7830   | 24000  | 10700 | 43800 | 6600  | 697.4 | 1392.8 | 2 | 0.0138 | 9.874 |

|                                                                      |                               |                                         |     |      |          |     |       |      |       |        |       |      |       |       |       |       |       |       |       |       |       |       |        |   |        |       |
|----------------------------------------------------------------------|-------------------------------|-----------------------------------------|-----|------|----------|-----|-------|------|-------|--------|-------|------|-------|-------|-------|-------|-------|-------|-------|-------|-------|-------|--------|---|--------|-------|
| Collagen alpha-1(I)<br>chain OS=Bos<br>taurus GN=COL1A1<br>PE=1 SV=3 | sp P0245<br>3 CO1A1<br>_BOVIN | gVQ<br>GPP<br>GPA<br>GPR                | 76% | 36.4 | 52.22425 | Ref | -1.3  | 1.2  | -1.4  | 0.022  | -1.1  | 0.84 | -1.5  | 11700 | 4210  | 25900 | 4750  | 14000 | 5450  | 22400 | 4360  | 697.4 | 1392.8 | 2 | 0.014  | 10.06 |
| Collagen alpha-1(I)<br>chain OS=Bos<br>taurus GN=COL1A1<br>PE=1 SV=3 | sp P0245<br>3 CO1A1<br>_BOVIN | sGD<br>RGET<br>GPA<br>GPIG<br>PVG<br>AR | 95% | 62.1 | 54.47682 | Ref | -1.6  | 1.2  | -1.4  | -0.13  | -1.1  | 0.96 | -1.1  | 10100 | 2940  | 21200 | 3980  | 10700 | 4700  | 20800 | 4910  | 760.7 | 2279.2 | 3 | 0.0181 | 7.916 |
| Collagen alpha-1(I)<br>chain OS=Bos<br>taurus GN=COL1A1<br>PE=1 SV=3 | sp P0245<br>3 CO1A1<br>_BOVIN | sLSQ<br>QIEN<br>IR                      | 58% | 33   | 52.65033 | Ref | -0.9  | 0.86 | -0.97 | -0.027 | -0.97 | 0.9  | -1.1  | 33800 | 15300 | 56200 | 17800 | 37700 | 17100 | 65500 | 16300 | 746.4 | 1490.8 | 2 | 0.0133 | 8.903 |
| Collagen alpha-1(I)<br>chain OS=Bos<br>taurus GN=COL1A1<br>PE=1 SV=3 | sp P0245<br>3 CO1A1<br>_BOVIN | sLSQ<br>QIEN<br>IR                      | 76% | 36.7 | 52.65316 | Ref | -0.51 | 0.66 | -0.79 | -0.098 | -0.59 | 0.76 | -0.67 | 9090  | 5980  | 14600 | 5980  | 10700 | 6620  | 17600 | 6490  | 746.4 | 1490.8 | 2 | 0.0138 | 9.225 |
| Collagen alpha-1(I)<br>chain OS=Bos<br>taurus GN=COL1A1<br>PE=1 SV=3 | sp P0245<br>3 CO1A1<br>_BOVIN | sTGI<br>SVP<br>GPM<br>GPS<br>GPR        | 95% | 59.2 | 52.95345 | Ref | -1.6  | 1.3  | -1.8  | 0.13   | -1.4  | 0.94 | -1.7  | 13100 | 3860  | 29500 | 4110  | 16800 | 5030  | 26900 | 4380  | 901   | 1799.9 | 2 | 0.0149 | 8.257 |

|                                                 |                                                                                                                                                                                                                            |                     |     |      |          |     |       |      |      |        |       |       |       |     |     |     |     |     |     |     |     |       |        |   |        |       |
|-------------------------------------------------|----------------------------------------------------------------------------------------------------------------------------------------------------------------------------------------------------------------------------|---------------------|-----|------|----------|-----|-------|------|------|--------|-------|-------|-------|-----|-----|-----|-----|-----|-----|-----|-----|-------|--------|---|--------|-------|
| Cofilin-1 OS=Sus<br>scrofa GN=CFL1<br>PE=1 SV=3 | sp P10668 COF1_PIG,sp P23528 COF1_HUMAN,sp Q4R5C0 COF1_MACFA,sp Q5E9F7 COF1_BOVIN,sp Q6B7M7 COF1_SHEEP,tr B0JYL8 B0JYL8_BOVIN,tr D2H4P3 D2H4P3_AILME,tr E2RG49 E2RG49_CANFA,tr F7DXG8 F7DXG8_HORSE,tr F7GPI9 F7GPI9_CALJAK | aSGV<br>AVS<br>DGVI | 65% | 33.9 | 52.22332 | Ref | -0.11 | -0.3 | 0.62 | 0.74   | -0.16 | -0.46 | -0.66 | 135 | 143 | 136 | 290 | 346 | 162 | 137 | 119 | 724.9 | 1447.8 | 2 | 0.0149 | 10.27 |
| Cofilin-1 OS=Sus<br>scrofa GN=CFL1<br>PE=1 SV=3 | sp P10668 COF1_PIG,sp P23528 COF1_HUMAN,sp Q4R5C0 COF1_MACFA,sp Q5E9F7 COF1_BOVIN,sp Q6B7M7 COF1_SHEEP,tr B0JYL8 B0JYL8_BOVIN,tr D2H4P3 D2H4P3_AILME,tr E2RG49 E2RG49_CANFA,tr F7DXG8 F7DXG8_HORSE,tr F7GPI9 F7GPI9_CALJAK | aSGV<br>AVS<br>DGVI | 89% | 41.7 | 52.24551 | Ref | -0.25 | 0.25 | 0.15 | -0.039 | 0.084 | -0.18 | -0.06 | 189 | 148 | 227 | 238 | 230 | 219 | 190 | 205 | 724.9 | 1447.8 | 2 | 0.0069 | 4.786 |

|                                                 |                                                                                                                                                                                                                            |                     |     |      |          |     |                                     |       |       |      |       |       |       |       |                                  |      |      |      |      |      |      |       |        |   |        |       |
|-------------------------------------------------|----------------------------------------------------------------------------------------------------------------------------------------------------------------------------------------------------------------------------|---------------------|-----|------|----------|-----|-------------------------------------|-------|-------|------|-------|-------|-------|-------|----------------------------------|------|------|------|------|------|------|-------|--------|---|--------|-------|
| Cofilin-1 OS=Sus<br>scrofa GN=CFL1<br>PE=1 SV=3 | sp P10668 COF1_PIG,sp P23528 COF1_HUMAN,sp Q4R5C0 COF1_MACFA,sp Q5E9F7 COF1_BOVIN,sp Q6B7M7 COF1_SHEEP,tr B0JYL8 B0JYL8_BOVIN,triD2H4P3 D2H4P3_AILME,triE2RG49 E2RG49_CANFA,triF7DXG8 F7DXG8_HORSE,triF7GPI9 F7GPI9_CALJAK | aSGV<br>AVS<br>DGVI | 95% | 62   | 52.22927 | Ref | Value<br>Missing<br>(-<br>1.423038) | -0.22 | 0.33  | 0.15 | 0.26  | -0.15 | 0.31  | 2050  | Value<br>Missing (-<br>1.423038) | 1630 | 2690 | 2600 | 2460 | 1930 | 2640 | 724.9 | 1447.8 | 2 | 0.0152 | 10.51 |
| Cofilin-1 OS=Sus<br>scrofa GN=CFL1<br>PE=1 SV=3 | sp P10668 COF1_PIG,sp P23528 COF1_HUMAN,sp Q4R5C0 COF1_MACFA,sp Q5E9F7 COF1_BOVIN,sp Q6B7M7 COF1_SHEEP,tr B0JYL8 B0JYL8_BOVIN,triD2H4P3 D2H4P3_AILME,triE2RG49 E2RG49_CANFA,triF7DXG8 F7DXG8_HORSE,triF7GPI9 F7GPI9_CALJAK | aSGV<br>AVS<br>DGVI | 95% | 57.4 | 52.28172 | Ref | 0.23                                | -0.88 | -0.46 | -0.6 | -0.26 | -0.83 | -0.36 | 11800 | 4520                             | 2260 | 3410 | 3400 | 3770 | 2640 | 3630 | 724.9 | 1447.8 | 2 | 0.0129 | 8.913 |

|                                                 |                                                                                                                                                                                                                                     |                    |     |      |          |     |       |       |       |       |       |       |       |      |      |      |      |      |      |      |      |       |        |   |        |       |
|-------------------------------------------------|-------------------------------------------------------------------------------------------------------------------------------------------------------------------------------------------------------------------------------------|--------------------|-----|------|----------|-----|-------|-------|-------|-------|-------|-------|-------|------|------|------|------|------|------|------|------|-------|--------|---|--------|-------|
| Cofilin-1 OS=Sus<br>scrofa GN=CFL1<br>PE=1 SV=3 | sp P10668 COF1_PIG,sp P23528 COF1_HUMAN,sp Q4R5C0 COF1_MACFA,sp Q5E9F7 COF1_BOVIN,sp Q6B7M7 COF1_SHEEP,tr B0JYL8 B0JYL8_BOVIN,tron D2H4P3 D2H4P3_AILME,tron E2RG49 E2RG49_CANFA,tron F7DXG8 F7DXG8_HORSE,tron F7GPI9 F7GPI9_CALJADK | aVLF<br>cLSE<br>DK | 91% | 45.8 | 52.93581 | Ref | 0.1   | -0.26 | 0.066 | -0.15 | 0.18  | -0.31 | 0.23  | 7480 | 7100 | 5970 | 8430 | 8000 | 8770 | 6510 | 9420 | 593.6 | 1777.9 | 3 | 0.0334 | 18.76 |
| Cofilin-1 OS=Sus<br>scrofa GN=CFL1<br>PE=1 SV=3 | sp P10668 COF1_PIG,sp P23528 COF1_HUMAN,sp Q4R5C0 COF1_MACFA,sp Q5E9F7 COF1_BOVIN,sp Q6B7M7 COF1_SHEEP,tr B0JYL8 B0JYL8_BOVIN,tron D2H4P3 D2H4P3_AILME,tron E2RG49 E2RG49_CANFA,tron F7DXG8 F7DXG8_HORSE,tron F7GPI9 F7GPI9_CALJADK | aVLF<br>cLSE<br>DK | 51% | 32.8 | 53.35283 | Ref | 0.093 | -0.05 | -0.1  | -0.05 | -0.08 | -0.01 | -0.03 | 3720 | 3150 | 3090 | 3360 | 3830 | 3270 | 3590 | 3520 | 593.7 | 1777.9 | 3 | 0.0096 | 5.384 |

|                                                 |                                                                                                                                                                                                                                                   |     |      |          |     |      |       |       |        |       |       |       |      |      |      |      |      |      |      |      |       |        |   |        |       |
|-------------------------------------------------|---------------------------------------------------------------------------------------------------------------------------------------------------------------------------------------------------------------------------------------------------|-----|------|----------|-----|------|-------|-------|--------|-------|-------|-------|------|------|------|------|------|------|------|------|-------|--------|---|--------|-------|
| Cofilin-1 OS=Sus<br>scrofa GN=CFL1<br>PE=1 SV=3 | sp P10668 COF1_PIG,sp P23528 COF1_HUMAN,sp Q4R5C0 COF1_MACFA,sp Q5E9F7 COF1_BOVIN,sp Q6B7M7 COF1_SHEEP,tr B0JYL8 B0JYL8_BOVIN,tr D2H4P3 D2H4P3_AILME,tr E2RG49 E2RG49_CANFA,tr F7DXG8 F7DXG8_HORSE,tr F7GPI9 F7GPI9_CALJAEiLVGDV<br>GQTVDDPYATFVk | 95% | 70.5 | 55.17763 | Ref | 0.11 | -0.01 | -0.02 | -0.074 | -0.08 | 0.037 | -0.03 | 3980 | 3810 | 3810 | 4240 | 4490 | 3910 | 4420 | 4200 | 925.5 | 2773.5 | 3 | 0.0203 | 7.322 |
| Cofilin-1 OS=Sus<br>scrofa GN=CFL1<br>PE=1 SV=3 | sp P10668 COF1_PIG,sp P23528 COF1_HUMAN,sp Q4R5C0 COF1_MACFA,sp Q5E9F7 COF1_BOVIN,sp Q6B7M7 COF1_SHEEP,tr B0JYL8 B0JYL8_BOVIN,tr D2H4P3 D2H4P3_AILME,tr E2RG49 E2RG49_CANFA,tr F7DXG8 F7DXG8_HORSE,tr F7GPI9 F7GPI9_CALJAEiLVGDV<br>GQTVDDPYATFVk | 95% | 58.9 | 55.12124 | Ref | 0.4  | 0.14  | 0.044 | -0.34  | -0.11 | -0.03 | -0.15 | 3380 | 4260 | 3850 | 4060 | 3420 | 3500 | 3870 | 3530 | 925.5 | 2773.5 | 3 | 0.0183 | 6.597 |

|                                                 |                                                                                                                                                                                                                                              |     |      |          |     |       |       |      |        |       |       |       |       |       |       |       |       |       |       |       |       |        |   |        |       |
|-------------------------------------------------|----------------------------------------------------------------------------------------------------------------------------------------------------------------------------------------------------------------------------------------------|-----|------|----------|-----|-------|-------|------|--------|-------|-------|-------|-------|-------|-------|-------|-------|-------|-------|-------|-------|--------|---|--------|-------|
| Cofilin-1 OS=Sus<br>scrofa GN=CFL1<br>PE=1 SV=3 | sp P10668 COF1_PIG,sp P23528 COF1_HUMAN,sp Q4R5C0 COF1_MACFA,sp Q5E9F7 COF1_BOVIN,sp Q6B7M7 COF1_SHEEP,tr B0JYL8 B0JYL8_BOVIN,tron D2H4P3 D2H4P3_AILME,tron E2RG49 E2RG49_CANFA,tron F7DXG8 F7DXG8_HORSE,tron F7GPI9 F7GPI9_CALJAEVKhELQANcY | 86% | 42.3 | 53.06541 | Ref | 0.19  | -0.2  | 0.05 | 0.002  | 0.025 | -0.27 | 0.012 | 8690  | 8350  | 6910  | 9190  | 9800  | 8700  | 7430  | 8930  | 706.4 | 2116   | 3 | 0.0155 | 7.34  |
| Cofilin-1 OS=Sus<br>scrofa GN=CFL1<br>PE=1 SV=3 | sp P10668 COF1_PIG,sp P23528 COF1_HUMAN,sp Q4R5C0 COF1_MACFA,sp Q5E9F7 COF1_BOVIN,sp Q6B7M7 COF1_SHEEP,tr B0JYL8 B0JYL8_BOVIN,tron D2H4P3 D2H4P3_AILME,tron E2RG49 E2RG49_CANFA,tron F7DXG8 F7DXG8_HORSE,tron F7GPI9 F7GPI9_CALJAEVKhELQANcY | 74% | 35.6 | 53.19315 | Ref | 0.085 | -0.21 | 0.12 | -0.077 | 0.16  | -0.08 | -0.02 | 14800 | 14500 | 12900 | 18100 | 17400 | 17900 | 15900 | 16500 | 597.8 | 2387.2 | 4 | 0.0213 | 8.939 |

|                                                          |                                                                                                                                                                                                                                    |                               |     |      |          |     |       |       |      |        |       |       |       |       |       |       |       |       |       |       |       |       |        |   |        |       |
|----------------------------------------------------------|------------------------------------------------------------------------------------------------------------------------------------------------------------------------------------------------------------------------------------|-------------------------------|-----|------|----------|-----|-------|-------|------|--------|-------|-------|-------|-------|-------|-------|-------|-------|-------|-------|-------|-------|--------|---|--------|-------|
| <p>Cofilin-1 OS=Sus<br/>scrofa GN=CFL1<br/>PE=1 SV=3</p> | <p>sp P10668 COF1_PIG,sp P23528 COF1_HUMAN,sp Q4R5C0 COF1_MACFA,sp Q5E9F7 COF1_BOVIN,sp Q6B7M7 COF1_SHEEP,tr B0JYL8 B0JYL8_BOVIN,triD2H4P3 D2H4P3_AILME,triE2RG49 E2RG49_CANFA,triF7DXG8 F7DXG8_HORSE,triF7GPI9 F7GPI9_CALJADR</p> | <p>hELQ<br/>ANcY<br/>EEVK</p> | 83% | 40.8 | 53.25306 | Ref | 0.012 | -0.12 | 0.19 | -0.013 | 0.052 | -0.3  | -0.02 | 7500  | 6210  | 6130  | 8530  | 8200  | 7490  | 6130  | 7400  | 796.7 | 2387.2 | 3 | 0.0196 | 8.225 |
| <p>Cofilin-1 OS=Sus<br/>scrofa GN=CFL1<br/>PE=1 SV=3</p> | <p>sp P10668 COF1_PIG,sp P23528 COF1_HUMAN,sp Q4R5C0 COF1_MACFA,sp Q5E9F7 COF1_BOVIN,sp Q6B7M7 COF1_SHEEP,tr B0JYL8 B0JYL8_BOVIN,triD2H4P3 D2H4P3_AILME,triE2RG49 E2RG49_CANFA,triF7DXG8 F7DXG8_HORSE,triF7GPI9 F7GPI9_CALJADR</p> | <p>kLTG</p>                   | 59% | 23.6 | 44.55225 | Ref | 0.054 | -0.39 | 0.28 | -0.097 | 0.3   | -0.39 | -0.13 | 78200 | 64800 | 51600 | 92200 | 78300 | 90200 | 58400 | 69000 | 393.8 | 1571   | 4 | 0.0095 | 6.063 |



|                                                 |                                                                                                                                                                                                                             |                            |     |      |          |     |        |       |      |        |      |       |       |       |       |       |       |       |       |       |       |       |        |   |        |       |
|-------------------------------------------------|-----------------------------------------------------------------------------------------------------------------------------------------------------------------------------------------------------------------------------|----------------------------|-----|------|----------|-----|--------|-------|------|--------|------|-------|-------|-------|-------|-------|-------|-------|-------|-------|-------|-------|--------|---|--------|-------|
| Cofilin-1 OS=Sus<br>scrofa GN=CFL1<br>PE=1 SV=3 | sp P10668 COF1_PIG,sp P23528 COF1_HUMAN,sp Q4R5C0 COF1_MACFA,sp Q5E9F7 COF1_BOVIN,sp Q6B7M7 COF1_SHEEP,tr B0JYL8 B0JYL8_BOVIN,triD2H4P3 D2H4P3_AILME,triE2RG49 E2RG49_CANFA,triF7DXG8 F7DXG8_HORSE,triF7GPI9 F7GPI9_CALJAPL | IGGS<br>AVIS<br>LEGK<br>PL | 62% | 32   | 50.63048 | Ref | -0.27  | -0.22 | 0.36 | 0.02   | 0.25 | -0.16 | -0.13 | 42900 | 32100 | 36000 | 60400 | 52500 | 53600 | 42300 | 42800 | 650.4 | 1948.2 | 3 | 0.0152 | 7.791 |
| Cofilin-1 OS=Sus<br>scrofa GN=CFL1<br>PE=1 SV=3 | sp P10668 COF1_PIG,sp P23528 COF1_HUMAN,sp Q4R5C0 COF1_MACFA,sp Q5E9F7 COF1_BOVIN,sp Q6B7M7 COF1_SHEEP,tr B0JYL8 B0JYL8_BOVIN,triD2H4P3 D2H4P3_AILME,triE2RG49 E2RG49_CANFA,triF7DXG8 F7DXG8_HORSE,triF7GPI9 F7GPI9_CALJAPL | IGGS<br>AVIS<br>LEGK<br>PL | 95% | 63.3 | 50.41274 | Ref | -0.023 | -0.53 | 0.19 | -0.061 | 0.28 | -0.21 | 0.14  | 13700 | 11700 | 8930  | 16600 | 15300 | 17000 | 12600 | 15900 | 975.1 | 1948.2 | 2 | 0.0101 | 5.187 |

|                                                 |                                                                                                                                                                                                                                    |                            |     |      |          |     |       |       |      |       |      |       |       |       |       |       |       |       |       |       |       |       |        |   |        |       |
|-------------------------------------------------|------------------------------------------------------------------------------------------------------------------------------------------------------------------------------------------------------------------------------------|----------------------------|-----|------|----------|-----|-------|-------|------|-------|------|-------|-------|-------|-------|-------|-------|-------|-------|-------|-------|-------|--------|---|--------|-------|
| Cofilin-1 OS=Sus<br>scrofa GN=CFL1<br>PE=1 SV=3 | sp P10668 COF1_PIG,sp P23528 COF1_HUMAN,sp Q4R5C0 COF1_MACFA,sp Q5E9F7 COF1_BOVIN,sp Q6B7M7 COF1_SHEEP,tr B0JYL8 B0JYL8_BOVIN,tron D2H4P3 D2H4P3_AILME,tron E2RG49 E2RG49_CANFA,tron F7DXG8 F7DXG8_HORSE,tron F7GPI9 F7GPI9_CALJIA | IGGS<br>AVIS<br>LEGK<br>PL | 95% | 52.5 | 50.2419  | Ref | 0.057 | -0.32 | 0.11 | -0.15 | 0.31 | -0.35 | 0.099 | 70300 | 61600 | 51300 | 77500 | 71600 | 86100 | 57000 | 77000 | 650.4 | 1948.2 | 3 | 0.0089 | 4.59  |
| Cofilin-1 OS=Sus<br>scrofa GN=CFL1<br>PE=1 SV=3 | sp P10668 COF1_PIG,sp P23528 COF1_HUMAN,sp Q4R5C0 COF1_MACFA,sp Q5E9F7 COF1_BOVIN,sp Q6B7M7 COF1_SHEEP,tr B0JYL8 B0JYL8_BOVIN,tron D2H4P3 D2H4P3_AILME,tron E2RG49 E2RG49_CANFA,tron F7DXG8 F7DXG8_HORSE,tron F7GPI9 F7GPI9_CALJIA | IGGS<br>AVIS<br>LEGK<br>PL | 95% | 65.3 | 49.81279 | Ref | 0.026 | -0.28 | 0.12 | 0.005 | 0.2  | -0.23 | 0.033 | 7890  | 7050  | 6180  | 9190  | 9330  | 9330  | 7210  | 8610  | 975.1 | 1948.2 | 2 | 0.0016 | 0.806 |

|                                                 |                                                                                                                                                                                                                             |                            |     |      |          |     |        |       |      |       |      |       |       |       |       |       |       |       |       |       |       |       |        |   |        |       |
|-------------------------------------------------|-----------------------------------------------------------------------------------------------------------------------------------------------------------------------------------------------------------------------------|----------------------------|-----|------|----------|-----|--------|-------|------|-------|------|-------|-------|-------|-------|-------|-------|-------|-------|-------|-------|-------|--------|---|--------|-------|
| Cofilin-1 OS=Sus<br>scrofa GN=CFL1<br>PE=1 SV=3 | sp P10668 COF1_PIG,sp P23528 COF1_HUMAN,sp Q4R5C0 COF1_MACFA,sp Q5E9F7 COF1_BOVIN,sp Q6B7M7 COF1_SHEEP,tr B0JYL8 B0JYL8_BOVIN,triD2H4P3 D2H4P3_AILME,triE2RG49 E2RG49_CANFA,triF7DXG8 F7DXG8_HORSE,triF7GPI9 F7GPI9_CALJAPL | IGGS<br>AVIS<br>LEGK<br>PL | 95% | 56.4 | 50.70942 | Ref | -0.15  | -0.18 | 0.29 | -0.05 | 0.26 | -0.38 | -0.02 | 15400 | 11900 | 12600 | 19500 | 17000 | 18400 | 12400 | 15700 | 650.4 | 1948.2 | 3 | 0.0165 | 8.453 |
| Cofilin-1 OS=Sus<br>scrofa GN=CFL1<br>PE=1 SV=3 | sp P10668 COF1_PIG,sp P23528 COF1_HUMAN,sp Q4R5C0 COF1_MACFA,sp Q5E9F7 COF1_BOVIN,sp Q6B7M7 COF1_SHEEP,tr B0JYL8 B0JYL8_BOVIN,triD2H4P3 D2H4P3_AILME,triE2RG49 E2RG49_CANFA,triF7DXG8 F7DXG8_HORSE,triF7GPI9 F7GPI9_CALJAPL | IGGS<br>AVIS<br>LEGK<br>PL | 95% | 70.2 | 50.63048 | Ref | -0.033 | -0.15 | 0.1  | 0.009 | 0.18 | -0.3  | 0.027 | 6070  | 5000  | 4990  | 6670  | 6900  | 6780  | 5070  | 6330  | 975.1 | 1948.2 | 2 | 0.0152 | 7.814 |

|                                                          |                                                                                                                                                                                                                                          |                               |            |             |                 |            |             |              |              |               |             |              |              |              |              |              |              |              |              |              |              |              |               |          |               |              |
|----------------------------------------------------------|------------------------------------------------------------------------------------------------------------------------------------------------------------------------------------------------------------------------------------------|-------------------------------|------------|-------------|-----------------|------------|-------------|--------------|--------------|---------------|-------------|--------------|--------------|--------------|--------------|--------------|--------------|--------------|--------------|--------------|--------------|--------------|---------------|----------|---------------|--------------|
| <p>Cofilin-1 OS=Sus<br/>scrofa GN=CFL1<br/>PE=1 SV=3</p> | <p>sp P10668 COF1_PIG,sp P23528 COF1_HUMAN,sp Q4R5C0 COF1_MACFA,sp Q5E9F7 COF1_BOVIN,sp Q6B7M7 COF1_SHEEP,tr B0JYL8 B0JYL8_BOVIN,triD2H4P3 D2H4P3_AILME,triE2RG49 E2RG49_CANFA,triF7DXG8 F7DXG8_HORSE,triF7GPI9 F7GPI9_CALJAPL</p>       | <p>IGGS<br/>AVIS<br/>LEGK</p> | <p>79%</p> | <p>36.4</p> | <p>50.56299</p> | <p>Ref</p> | <p>0.03</p> | <p>-0.03</p> | <p>-0.04</p> | <p>-0.002</p> | <p>0.12</p> | <p>-0.14</p> | <p>-0.02</p> | <p>1710</p>  | <p>1520</p>  | <p>1580</p>  | <p>1760</p>  | <p>1990</p>  | <p>1890</p>  | <p>1650</p>  | <p>1780</p>  | <p>650.4</p> | <p>1948.2</p> | <p>3</p> | <p>0.0134</p> | <p>6.853</p> |
| <p>Cofilin-1 OS=Sus<br/>scrofa GN=CFL1<br/>PE=1 SV=3</p> | <p>sp P10668 COF1_PIG,sp P23528 COF1_HUMAN,sp Q4R5C0 COF1_MACFA,sp Q5E9F7 COF1_BOVIN,sp Q6B7M7 COF1_SHEEP,tr B0JYL8 B0JYL8_BOVIN,triD2H4P3 D2H4P3_AILME,triE2RG49 E2RG49_CANFA,triF7DXG8 F7DXG8_HORSE,triF7GPI9 F7GPI9_CALJAniILEEGK</p> | <p>nILE<br/>EGK</p>           | <p>57%</p> | <p>30.8</p> | <p>50.51504</p> | <p>Ref</p> | <p>0.14</p> | <p>-0.12</p> | <p>0.11</p>  | <p>-0.13</p>  | <p>0.1</p>  | <p>-0.37</p> | <p>-0.18</p> | <p>52200</p> | <p>41800</p> | <p>37800</p> | <p>49700</p> | <p>46500</p> | <p>47600</p> | <p>35700</p> | <p>40600</p> | <p>762.5</p> | <p>1522.9</p> | <p>2</p> | <p>0.0102</p> | <p>6.716</p> |

|                                                 |                                                                                                                                                                                                                                      |                                                   |     |      |          |     |                  |                       |                        |                               |                                |                                  |                        |                        |                       |                       |                               |                               |                                |                       |       |        |        |        |       |       |
|-------------------------------------------------|--------------------------------------------------------------------------------------------------------------------------------------------------------------------------------------------------------------------------------------|---------------------------------------------------|-----|------|----------|-----|------------------|-----------------------|------------------------|-------------------------------|--------------------------------|----------------------------------|------------------------|------------------------|-----------------------|-----------------------|-------------------------------|-------------------------------|--------------------------------|-----------------------|-------|--------|--------|--------|-------|-------|
| Cofilin-1 OS=Sus<br>scrofa GN=CFL1<br>PE=1 SV=3 | sp P10668 COF1_PIG,sp P23528 COF1_HUMAN,sp Q4R5C0 COF1_MACFA,sp Q5E9F7 COF1_BOVIN,sp Q6B7M7 COF1_SHEEP,tr B0JYL8 B0JYL8_BOVIN,tron D2H4P3 D2H4P3_AILME,tron E2RG49 E2RG49_CANFA,tron F7DXG8 F7DXG8_HORSE,tron F7GP19 F7GPI9_CALJAEgk | nILE                                              | 61% | 32   | 50.7501  | Ref | 0.19             | -0.31                 | 0.041                  | -0.13                         | 0.094                          | -0.2                             | 0.028                  | 32500                  | 29100                 | 22400                 | 32100                         | 31400                         | 32000                          | 27300                 | 31700 | 508.6  | 1522.9 | 3      | 0.019 | 12.49 |
| Cofilin-1 OS=Sus<br>scrofa GN=CFL1<br>PE=1 SV=3 | sp P10668 COF1_PIG,sp P23528 COF1_HUMAN,sp Q4R5C0 COF1_MACFA,sp Q5E9F7 COF1_BOVIN,sp Q6B7M7 COF1_SHEEP,tr B0JYL8 B0JYL8_BOVIN,tron D2H4P3 D2H4P3_AILME,tron E2RG49 E2RG49_CANFA,tron F7DXG8 F7DXG8_HORSE,tron F7GP19 F7GPI9_CALJAVk  | nILE<br>EGkE<br>ILVG<br>DVG<br>QTV<br>DDP<br>YATF | 73% | 36.2 | 54.28234 | Ref | No Values (-794) | No Values (-1.676073) | No Values (-1.8426678) | Reference Missing (1.0280646) | Reference Missing (1.39013763) | Reference Missing (0.8331839167) | No Values (-1.7607696) | No Values (-1.5583794) | No Values (-1.676073) | No Values (-1.842678) | Reference Missing (1.0280646) | Reference Missing (1.3905867) | Reference Missing (0.83313763) | No Values (-1.839167) | 994.6 | 3974.2 | 4      | 0.0304 | 7.65  |       |

|                                                 |                                                                                                                                                                                                                                      |                                                    |     |      |          |     |                                          |       |      |       |      |       |      |     |                                       |     |     |     |     |     |     |       |        |   |        |       |
|-------------------------------------------------|--------------------------------------------------------------------------------------------------------------------------------------------------------------------------------------------------------------------------------------|----------------------------------------------------|-----|------|----------|-----|------------------------------------------|-------|------|-------|------|-------|------|-----|---------------------------------------|-----|-----|-----|-----|-----|-----|-------|--------|---|--------|-------|
| Cofilin-1 OS=Sus<br>scrofa GN=CFL1<br>PE=1 SV=3 | sp P10668 COF1_PIG,sp P23528 COF1_HUMAN,sp Q4R5C0 COF1_MACFA,sp Q5E9F7 COF1_BOVIN,sp Q6B7M7 COF1_SHEEP,tr B0JYL8 B0JYL8_BOVIN,tron D2H4P3 D2H4P3_AILME,tron E2RG49 E2RG49_CANFA,tron F7DXG8 F7DXG8_HO RSE,tron F7GPI9 F7GPI9_CALJAVk | nHILE<br>EGkE<br>ILVG<br>DVG<br>QTV<br>DDP<br>YATF | 89% | 42.1 | 53.18314 | Ref | Value<br>Missing<br>(-<br>2.8399<br>367) | -0.44 | 0.18 | 0.45  | 0.34 | -0.2  | 0.41 | 194 | Value<br>Missing (-<br>2.839936<br>7) | 122 | 211 | 279 | 226 | 163 | 247 | 994.6 | 3974.2 | 4 | 0.0028 | 0.702 |
| Cofilin-1 OS=Sus<br>scrofa GN=CFL1<br>PE=1 SV=3 | sp P10668 COF1_PIG,sp P23528 COF1_HUMAN,sp Q4R5C0 COF1_MACFA,sp Q5E9F7 COF1_BOVIN,sp Q6B7M7 COF1_SHEEP,tr B0JYL8 B0JYL8_BOVIN,tron D2H4P3 D2H4P3_AILME,tron E2RG49 E2RG49_CANFA,tron F7DXG8 F7DXG8_HO RSE,tron F7GPI9 F7GPI9_CALJAVk | nHILE<br>EGkE<br>ILVG<br>DVG<br>QTV<br>DDP<br>YATF | 95% | 52.6 | 53.56573 | Ref | 0.061                                    | -0.54 | 0.25 | -0.19 | 0.49 | -0.35 | 0.21 | 208 | 234                                   | 167 | 325 | 263 | 369 | 215 | 314 | 994.6 | 3974.2 | 4 | 0.0082 | 2.055 |

|                                                 |                                                                                                                                                                                                                                              |                                                   |     |      |          |     |       |       |       |        |      |       |      |       |        |       |        |        |       |       |        |       |        |   |        |       |
|-------------------------------------------------|----------------------------------------------------------------------------------------------------------------------------------------------------------------------------------------------------------------------------------------------|---------------------------------------------------|-----|------|----------|-----|-------|-------|-------|--------|------|-------|------|-------|--------|-------|--------|--------|-------|-------|--------|-------|--------|---|--------|-------|
| Cofilin-1 OS=Sus<br>scrofa GN=CFL1<br>PE=1 SV=3 | sp P10668 COF1_PIG,sp P23528 COF1_HUMAN,sp Q4R5C0 COF1_MACFA,sp Q5E9F7 COF1_BOVIN,sp Q6B7M7 COF1_SHEEP,tr B0JYL8 B0JYL8_BOVIN,tr D2H4P3 D2H4P3_AILME,tr E2RG49 E2RG49_CANFA,tr F7DXG8 F7DXG8_HORSE,tr F7GPI9 F7GPI9_CALJAVk                  | nHLE<br>EGkE<br>ILVG<br>DVG<br>qTV<br>DDP<br>YATF | 84% | 39.9 | 53.81712 | Ref | -0.38 | -0.38 | 0.37  | -0.14  | 0.36 | -0.21 | 0.24 | 181   | 136    | 148   | 279    | 216    | 266   | 187   | 255    | 994.8 | 3975.2 | 4 | #####  | 0.035 |
| Cofilin-1 OS=Sus<br>scrofa GN=CFL1<br>PE=1 SV=3 | sp P10668 COF1_PIG,sp P23528 COF1_HUMAN,sp Q4R5C0 COF1_MACFA,sp Q5E9F7 COF1_BOVIN,sp Q6B7M7 COF1_SHEEP,tr B0JYL8 B0JYL8_BOVIN,tr D2H4P3 D2H4P3_AILME,tr E2RG49 E2RG49_CANFA,tr F7DXG8 F7DXG8_HORSE,tr F7GPI9 F7GPI9_CALJAYALY<br>DAT<br>YETK |                                                   | 94% | 51.7 | 53.79905 | Ref | 0.059 | -0.44 | 0.027 | -0.024 | 0.09 | 0.12  | -0   | 1E+05 | 112000 | 86000 | 134000 | 142000 | 1E+05 | 1E+05 | 131000 | 649.3 | 1945   | 3 | 0.0157 | 8.062 |

|                                                 |                                                                                                                                                                                                                           |                     |     |      |          |     |        |       |       |        |       |       |       |       |       |       |        |       |       |       |       |       |      |   |        |       |
|-------------------------------------------------|---------------------------------------------------------------------------------------------------------------------------------------------------------------------------------------------------------------------------|---------------------|-----|------|----------|-----|--------|-------|-------|--------|-------|-------|-------|-------|-------|-------|--------|-------|-------|-------|-------|-------|------|---|--------|-------|
| Cofilin-1 OS=Sus<br>scrofa GN=CFL1<br>PE=1 SV=3 | sp P10668 COF1_PIG,sp P23528 COF1_HUMAN,sp Q4R5C0 COF1_MACFA,sp Q5E9F7 COF1_BOVIN,sp Q6B7M7 COF1_SHEEP,tr B0JYL8 B0JYL8_BOVIN,tr D2H4P3 D2H4P3_AILME,tr E2RG49 E2RG49_CANFA,tr F7DXG8 F7DXG8_HORSE,tr F7GPI9 F7GPI9_CALJA | yALY<br>DAT<br>YETK | 88% | 44.6 | 53.79639 | Ref | -0.098 | -0.11 | 0.077 | -0.027 | -0.09 | -0.16 | 0.054 | 11700 | 8090  | 8730  | 11100  | 11400 | 9570  | 9500  | 10900 | 649.3 | 1945 | 3 | 0.0155 | 7.954 |
| Cofilin-1 OS=Sus<br>scrofa GN=CFL1<br>PE=1 SV=3 | sp P10668 COF1_PIG,sp P23528 COF1_HUMAN,sp Q4R5C0 COF1_MACFA,sp Q5E9F7 COF1_BOVIN,sp Q6B7M7 COF1_SHEEP,tr B0JYL8 B0JYL8_BOVIN,tr D2H4P3 D2H4P3_AILME,tr E2RG49 E2RG49_CANFA,tr F7DXG8 F7DXG8_HORSE,tr F7GPI9 F7GPI9_CALJA | yALY<br>DAT<br>YETK | 73% | 37.8 | 53.8072  | Ref | 0.026  | -0.63 | 0.29  | 0.028  | 0.11  | 0.005 | 0.12  | 73200 | 74000 | 50800 | 108000 | 99500 | 91700 | 89300 | 96200 | 649.3 | 1945 | 3 | 0.0148 | 7.584 |



|                                                          |                                                                                                                                                                                                                                      |                     |            |             |                 |            |               |              |              |              |              |              |              |              |              |              |              |              |              |              |              |              |             |          |               |              |
|----------------------------------------------------------|--------------------------------------------------------------------------------------------------------------------------------------------------------------------------------------------------------------------------------------|---------------------|------------|-------------|-----------------|------------|---------------|--------------|--------------|--------------|--------------|--------------|--------------|--------------|--------------|--------------|--------------|--------------|--------------|--------------|--------------|--------------|-------------|----------|---------------|--------------|
| <p>Cofilin-1 OS=Sus<br/>scrofa GN=CFL1<br/>PE=1 SV=3</p> | <p>sp P10668 COF1_PIG,sp P23528 COF1_HUMAN,sp Q4R5C0 COF1_MACFA,sp Q5E9F7 COF1_BOVIN,sp Q6B7M7 COF1_SHEEP,tr B0JYL8 B0JYL8_BOVIN,triD2H4P3 D2H4P3_AILME,triE2RG49 E2RG49_CANFA,triF7DXG8 F7DXG8_HORSE,triF7GPI9 F7GPI9_CALJAYETK</p> | <p>yALY<br/>DAT</p> | <p>93%</p> | <p>49.1</p> | <p>53.79567</p> | <p>Ref</p> | <p>0.011</p>  | <p>0.07</p>  | <p>0.046</p> | <p>-0.18</p> | <p>0.013</p> | <p>-0.1</p>  | <p>0.083</p> | <p>5340</p>  | <p>4810</p>  | <p>5440</p>  | <p>6010</p>  | <p>5660</p>  | <p>5650</p>  | <p>5480</p>  | <p>6150</p>  | <p>649.3</p> | <p>1945</p> | <p>3</p> | <p>0.0094</p> | <p>4.855</p> |
| <p>Cofilin-1 OS=Sus<br/>scrofa GN=CFL1<br/>PE=1 SV=3</p> | <p>sp P10668 COF1_PIG,sp P23528 COF1_HUMAN,sp Q4R5C0 COF1_MACFA,sp Q5E9F7 COF1_BOVIN,sp Q6B7M7 COF1_SHEEP,tr B0JYL8 B0JYL8_BOVIN,triD2H4P3 D2H4P3_AILME,triE2RG49 E2RG49_CANFA,triF7DXG8 F7DXG8_HORSE,triF7GPI9 F7GPI9_CALJAYETK</p> | <p>yALY<br/>DAT</p> | <p>95%</p> | <p>69.4</p> | <p>53.76858</p> | <p>Ref</p> | <p>-0.074</p> | <p>-0.34</p> | <p>0.14</p>  | <p>0.046</p> | <p>0.29</p>  | <p>-0.33</p> | <p>-0</p>    | <p>42300</p> | <p>33000</p> | <p>29700</p> | <p>46600</p> | <p>48100</p> | <p>49900</p> | <p>33800</p> | <p>42100</p> | <p>973.5</p> | <p>1945</p> | <p>2</p> | <p>0.0151</p> | <p>7.761</p> |

|                                                 |                                                                                                                                                                                                                           |                     |     |      |          |     |       |       |      |       |      |       |       |       |       |       |       |       |       |       |       |       |      |   |        |       |
|-------------------------------------------------|---------------------------------------------------------------------------------------------------------------------------------------------------------------------------------------------------------------------------|---------------------|-----|------|----------|-----|-------|-------|------|-------|------|-------|-------|-------|-------|-------|-------|-------|-------|-------|-------|-------|------|---|--------|-------|
| Cofilin-1 OS=Sus<br>scrofa GN=CFL1<br>PE=1 SV=3 | sp P10668 COF1_PIG,sp P23528 COF1_HUMAN,sp Q4R5C0 COF1_MACFA,sp Q5E9F7 COF1_BOVIN,sp Q6B7M7 COF1_SHEEP,tr B0JYL8 B0JYL8_BOVIN,tr D2H4P3 D2H4P3_AILME,tr E2RG49 E2RG49_CANFA,tr F7DXG8 F7DXG8_HORSE,tr F7GPI9 F7GPI9_CALJA | yALY<br>DAT<br>YETK | 95% | 56.3 | 53.85313 | Ref | 0.029 | -0.24 | 0.14 | 0.024 | 0.26 | -0.39 | 0.012 | 15600 | 13800 | 12500 | 18200 | 18500 | 19000 | 12700 | 16600 | 973.5 | 1945 | 2 | 0.0084 | 4.318 |
| Cofilin-1 OS=Sus<br>scrofa GN=CFL1<br>PE=1 SV=3 | sp P10668 COF1_PIG,sp P23528 COF1_HUMAN,sp Q4R5C0 COF1_MACFA,sp Q5E9F7 COF1_BOVIN,sp Q6B7M7 COF1_SHEEP,tr B0JYL8 B0JYL8_BOVIN,tr D2H4P3 D2H4P3_AILME,tr E2RG49 E2RG49_CANFA,tr F7DXG8 F7DXG8_HORSE,tr F7GPI9 F7GPI9_CALJA | yALY<br>DAT<br>YETK | 95% | 70.1 | 53.73537 | Ref | -0.11 | -0.29 | 0.15 | 0.13  | 0.32 | -0.4  | 0.09  | 3490  | 3050  | 2910  | 4430  | 4840  | 4820  | 3050  | 4250  | 973.5 | 1945 | 2 | 0.0189 | 9.714 |

|                                                                                                          |                                                                                                                                                                                                                                       |                               |     |      |          |     |       |       |       |       |      |       |       |       |       |       |       |       |       |       |       |       |        |   |        |       |
|----------------------------------------------------------------------------------------------------------|---------------------------------------------------------------------------------------------------------------------------------------------------------------------------------------------------------------------------------------|-------------------------------|-----|------|----------|-----|-------|-------|-------|-------|------|-------|-------|-------|-------|-------|-------|-------|-------|-------|-------|-------|--------|---|--------|-------|
| Plasminogen<br>activator inhibitor 1<br>RNA-binding<br>protein OS=Homo<br>sapiens GN=SERBP1<br>PE=1 SV=2 | sp Q8NC51 PAIRB_HUMAN, tr A1L5B7 A1L5B7_BOVIN, tr F1MFK6 F1MFK6_BOVIN, tr F6WZG6 F6WZG6_MACMU, tr F7EEX7 F7EEX7_C<br>ALJA, tr Q4R9B0 Q4R9B0_M<br>ACFA, tr Q4R9B2 Q4R9B2_M<br>ACFA, tr Q5VU21 Q5VU21_H<br>UMAN, tr Q63HR1 Q63HR1_HUMAN | eAG<br>GGG<br>VGG<br>PGA<br>k | 95% | 62.7 | 52.87445 | Ref | -0.49 | -0.42 | 0.061 | -0.14 | 0.39 | -0.93 | 0.11  | 22100 | 13500 | 15400 | 24100 | 23100 | 29100 | 12200 | 24900 | 811.5 | 1620.9 | 2 | 0.0139 | 8.562 |
| Plasminogen<br>activator inhibitor 1<br>RNA-binding<br>protein OS=Homo<br>sapiens GN=SERBP1<br>PE=1 SV=2 | sp Q8NC51 PAIRB_HUMAN, tr A1L5B7 A1L5B7_BOVIN, tr F1MFK6 F1MFK6_BOVIN, tr F6WZG6 F6WZG6_MACMU, tr F7EEX7 F7EEX7_C<br>ALJA, tr Q4R9B0 Q4R9B0_M<br>ACFA, tr Q4R9B2 Q4R9B2_M<br>ACFA, tr Q5VU21 Q5VU21_H<br>UMAN, tr Q63HR1 Q63HR1_HUMAN | eETQ<br>PPV<br>Alk            | 95% | 51.4 | 52.39877 | Ref | -0.22 | -0.33 | 0.024 | -0.28 | 0.2  | -0.64 | -0.15 | 20500 | 13400 | 13500 | 19300 | 17200 | 21000 | 12300 | 17100 | 860.5 | 1719   | 2 | 0.0051 | 2.961 |

|                                                                                           |                                                                                                                                                                                                                          |            |     |      |          |     |       |       |       |       |      |       |       |       |       |       |       |       |       |       |       |       |        |   |        |       |
|-------------------------------------------------------------------------------------------|--------------------------------------------------------------------------------------------------------------------------------------------------------------------------------------------------------------------------|------------|-----|------|----------|-----|-------|-------|-------|-------|------|-------|-------|-------|-------|-------|-------|-------|-------|-------|-------|-------|--------|---|--------|-------|
| Plasminogen activator inhibitor 1 RNA-binding protein OS=Homo sapiens GN=SERBP1 PE=1 SV=2 | sp Q8NC51 PAIRB_HUMAN, tr A1L5B7 A1L5B7_BOVIN, tr F1MFK6 F1MFK6_BOVIN, tr F6WZG6 F6WZG6_MACMU, tr F7EEX7 F7EEX7_C ALJA, tr Q4R9B0 Q4R9B0_M ACFA, tr Q4R9B2 Q4R9B2_M ACFA, tr Q5VU21 Q5VU21_HUMAN, tr Q63HR1 Q63HR1_HUMAN | eMT LDE Wk | 55% | 32.7 | 52.4718  | Ref | -0.65 | -0.39 | -0.04 | -0.21 | 0.37 | -0.61 | 0.16  | 22700 | 12200 | 15800 | 22700 | 22200 | 29100 | 15300 | 25900 | 554   | 1658.9 | 3 | 0.0194 | 11.71 |
| Plasminogen activator inhibitor 1 RNA-binding protein OS=Homo sapiens GN=SERBP1 PE=1 SV=2 | sp Q8NC51 PAIRB_HUMAN, tr A1L5B7 A1L5B7_BOVIN, tr F1MFK6 F1MFK6_BOVIN, tr F6WZG6 F6WZG6_MACMU, tr F7EEX7 F7EEX7_C ALJA, tr Q4R9B0 Q4R9B0_M ACFA, tr Q4R9B2 Q4R9B2_M ACFA, tr Q5VU21 Q5VU21_HUMAN, tr Q63HR1 Q63HR1_HUMAN | eMT LDE Wk | 55% | 32.6 | 52.64835 | Ref | -0.34 | -0.44 | -0.05 | -0.2  | 0.25 | -0.63 | 0.069 | 8440  | 5340  | 5400  | 7980  | 7930  | 9430  | 5360  | 8630  | 830.4 | 1658.9 | 2 | 0.0091 | 5.5   |

|                                                                                                          |                                                                                                                                                                                                                                   |                             |     |      |          |     |       |       |       |       |       |       |       |       |       |       |        |        |       |       |        |       |        |   |       |       |
|----------------------------------------------------------------------------------------------------------|-----------------------------------------------------------------------------------------------------------------------------------------------------------------------------------------------------------------------------------|-----------------------------|-----|------|----------|-----|-------|-------|-------|-------|-------|-------|-------|-------|-------|-------|--------|--------|-------|-------|--------|-------|--------|---|-------|-------|
| Plasminogen<br>activator inhibitor 1<br>RNA-binding<br>protein OS=Homo<br>sapiens GN=SERBP1<br>PE=1 SV=2 | sp Q8NC51 PAIRB_HUMAN, tr A1L5B7 A1L5B7_BOVIN, tr F1MFK6 F1MFK6_BOVIN, tr F6WZG6 F6WZG6_MACMU, tr F7EEX7 F7EEX7_C<br>ALJA, tr Q4R9B0 Q4R9B0_M<br>ACFA, tr Q4R9B2 Q4R9B2_M<br>ACFA, tr Q5VU21 Q5VU21_HUMAN, tr Q63HR1 Q63HR1_HUMAN | fDQL<br>FDD<br>ESDP<br>FEVL | 95% | 62   | 54.60533 | Ref | -0.21 | -0.35 | 0.21  | -0.29 | 0.057 | -0.58 | 0.003 | 2250  | 1680  | 1650  | 2730   | 2130   | 2370  | 1590  | 2360   | 851.4 | 2551.3 | 3 | 0.014 | 5.477 |
| Plasminogen<br>activator inhibitor 1<br>RNA-binding<br>protein OS=Homo<br>sapiens GN=SERBP1<br>PE=1 SV=2 | sp Q8NC51 PAIRB_HUMAN, tr A1L5B7 A1L5B7_BOVIN, tr F1MFK6 F1MFK6_BOVIN, tr F6WZG6 F6WZG6_MACMU, tr F7EEX7 F7EEX7_C<br>ALJA, tr Q4R9B0 Q4R9B0_M<br>ACFA, tr Q4R9B2 Q4R9B2_M<br>ACFA, tr Q5VU21 Q5VU21_HUMAN, tr Q63HR1 Q63HR1_HUMAN | gFVL<br>HK                  | 61% | 29.4 | 48.04555 | Ref | -0.66 | -0.35 | -0.05 | -0.14 | 0.38  | -0.9  | 0.17  | 1E+05 | 58000 | 78300 | 108000 | 111000 | 1E+05 | 60300 | 125000 | 436.9 | 1307.8 | 3 | 0.004 | 3.067 |

|                                                                                           |                                                                                                                                                                                                                          |         |     |      |          |     |       |       |       |       |      |       |       |       |        |       |        |        |       |       |        |       |        |   |        |       |
|-------------------------------------------------------------------------------------------|--------------------------------------------------------------------------------------------------------------------------------------------------------------------------------------------------------------------------|---------|-----|------|----------|-----|-------|-------|-------|-------|------|-------|-------|-------|--------|-------|--------|--------|-------|-------|--------|-------|--------|---|--------|-------|
| Plasminogen activator inhibitor 1 RNA-binding protein OS=Homo sapiens GN=SERBP1 PE=1 SV=2 | sp Q8NC51 PAIRB_HUMAN, tr A1L5B7 A1L5B7_BOVIN, tr F1MFK6 F1MFK6_BOVIN, tr F6WZG6 F6WZG6_MACMU, tr F7EEX7 F7EEX7_C ALJA, tr Q4R9B0 Q4R9B0_M ACFA, tr Q4R9B2 Q4R9B2_M ACFA, tr Q5VU21 Q5VU21_HUMAN, tr Q63HR1 Q63HR1_HUMAN | gFVL HK | 77% | 32.1 | 47.6003  | Ref | -0.43 | -0.4  | -0.04 | -0.12 | 0.25 | -0.41 | 0.085 | 31500 | 21800  | 24100 | 34600  | 36200  | 40800 | 27000 | 37700  | 654.9 | 1307.8 | 2 | 0.0029 | 2.222 |
| Plasminogen activator inhibitor 1 RNA-binding protein OS=Homo sapiens GN=SERBP1 PE=1 SV=2 | sp Q8NC51 PAIRB_HUMAN, tr A1L5B7 A1L5B7_BOVIN, tr F1MFK6 F1MFK6_BOVIN, tr F6WZG6 F6WZG6_MACMU, tr F7EEX7 F7EEX7_C ALJA, tr Q4R9B0 Q4R9B0_M ACFA, tr Q4R9B2 Q4R9B2_M ACFA, tr Q5VU21 Q5VU21_HUMAN, tr Q63HR1 Q63HR1_HUMAN | gFVL HK | 60% | 29.3 | 48.26955 | Ref | -0.42 | -0.43 | -0.13 | -0.11 | 0.31 | -0.76 | 0.11  | 3E+05 | 180000 | 2E+05 | 269000 | 299000 | 4E+05 | 2E+05 | 315000 | 436.9 | 1307.8 | 3 | 0.0128 | 9.784 |

|                                                                                           |                                                                                                                                                                                                                           |         |     |      |          |     |       |       |       |       |      |       |       |       |        |       |        |        |       |       |        |       |        |   |        |       |
|-------------------------------------------------------------------------------------------|---------------------------------------------------------------------------------------------------------------------------------------------------------------------------------------------------------------------------|---------|-----|------|----------|-----|-------|-------|-------|-------|------|-------|-------|-------|--------|-------|--------|--------|-------|-------|--------|-------|--------|---|--------|-------|
| Plasminogen activator inhibitor 1 RNA-binding protein OS=Homo sapiens GN=SERBP1 PE=1 SV=2 | sp Q8NC51 PAIRB_HUMAN, tr A1L5B7 A1L5B7_BOVIN, tr F1MFK6 F1MFK6_BOVIN, tr F6WZG6 F6WZG6_MACMU, tr F7EEX7 F7EEX7_C ALJA, tr Q4R9B0 Q4R9B0_M ACFA, tr Q4R9B2 Q4R9B2_M ACFA, tr Q5VU21 Q5VU21_H UMAN, tr Q63HR1 Q63HR1_HUMAN | gFVL HK | 60% | 29.3 | 48.16745 | Ref | -0.65 | -0.37 | 0.098 | -0.2  | 0.45 | -0.96 | 0.15  | 3E+05 | 182000 | 2E+05 | 373000 | 335000 | 5E+05 | 2E+05 | 385000 | 436.9 | 1307.8 | 3 | 0.0119 | 9.096 |
| Plasminogen activator inhibitor 1 RNA-binding protein OS=Homo sapiens GN=SERBP1 PE=1 SV=2 | sp Q8NC51 PAIRB_HUMAN, tr A1L5B7 A1L5B7_BOVIN, tr F1MFK6 F1MFK6_BOVIN, tr F6WZG6 F6WZG6_MACMU, tr F7EEX7 F7EEX7_C ALJA, tr Q4R9B0 Q4R9B0_M ACFA, tr Q4R9B2 Q4R9B2_M ACFA, tr Q5VU21 Q5VU21_H UMAN, tr Q63HR1 Q63HR1_HUMAN | gFVL HK | 65% | 29.4 | 47.65147 | Ref | -0.44 | -0.4  | -0.08 | -0.14 | 0.41 | -0.89 | 0.036 | 64400 | 37700  | 42000 | 59100  | 62300  | 79600 | 33800 | 63800  | 654.9 | 1307.8 | 2 | 0.0016 | 1.199 |

|                                                                                           |                                                                                                                                                                                                                          |                                |     |      |          |     |       |       |       |        |      |       |       |      |      |      |      |      |       |      |       |       |        |   |        |       |
|-------------------------------------------------------------------------------------------|--------------------------------------------------------------------------------------------------------------------------------------------------------------------------------------------------------------------------|--------------------------------|-----|------|----------|-----|-------|-------|-------|--------|------|-------|-------|------|------|------|------|------|-------|------|-------|-------|--------|---|--------|-------|
| Plasminogen activator inhibitor 1 RNA-binding protein OS=Homo sapiens GN=SERBP1 PE=1 SV=2 | sp Q8NC51 PAIRB_HUMAN, tr A1L5B7 A1L5B7_BOVIN, tr F1MFK6 F1MFK6_BOVIN, tr F6WZG6 F6WZG6_MACMU, tr F7EEX7 F7EEX7_C ALJA, tr Q4R9B0 Q4R9B0_M ACFA, tr Q4R9B2 Q4R9B2_M ACFA, tr Q5VU21 Q5VU21_HUMAN, tr Q63HR1 Q63HR1_HUMAN | gFVL<br>HK                     | 52% | 28.5 | 48.82297 | Ref | -0.57 | -0.32 | -0.04 | -0.23  | 0.46 | -0.75 | 0.058 | 2130 | 1210 | 1570 | 2130 | 2060 | 2900  | 1310 | 2280  | 436.9 | 1307.8 | 3 | 0.0187 | 14.25 |
|                                                                                           | sp Q8NC51 PAIRB_HUMAN, tr A1L5B7 A1L5B7_BOVIN, tr F1MFK6 F1MFK6_BOVIN, tr F6WZG6 F6WZG6_MACMU, tr F7EEX7 F7EEX7_C ALJA, tr Q4R9B0 Q4R9B0_M ACFA, tr Q4R9B2 Q4R9B2_M ACFA, tr Q5VU21 Q5VU21_HUMAN, tr Q63HR1 Q63HR1_HUMAN | kEAG<br>GGG<br>VGG<br>PGA<br>k | 95% | 51.9 | 53.00028 | Ref | -0.68 | -0.38 | -0.06 | -0.078 | 0.25 | -0.55 | 0.31  | 7910 | 4680 | 6230 | 8750 | 9500 | 10500 | 6230 | 11200 | 685.4 | 2053.2 | 3 | 0.0371 | 18.08 |



|                                                                                                          |                                                                                                                                                                                                                                       |                            |     |      |          |     |       |      |       |       |      |       |       |       |       |       |       |       |       |       |       |       |        |   |        |       |
|----------------------------------------------------------------------------------------------------------|---------------------------------------------------------------------------------------------------------------------------------------------------------------------------------------------------------------------------------------|----------------------------|-----|------|----------|-----|-------|------|-------|-------|------|-------|-------|-------|-------|-------|-------|-------|-------|-------|-------|-------|--------|---|--------|-------|
| Plasminogen<br>activator inhibitor 1<br>RNA-binding<br>protein OS=Homo<br>sapiens GN=SERBP1<br>PE=1 SV=2 | sp Q8NC51 PAIRB_HUMAN, tr A1L5B7 A1L5B7_BOVIN, tr F1MFK6 F1MFK6_BOVIN, tr F6WZG6 F6WZG6_MACMU, tr F7EEX7 F7EEX7_C<br>ALJA, tr Q4R9B0 Q4R9B0_M<br>ACFA, tr Q4R9B2 Q4R9B2_M<br>ACFA, tr Q5VU21 Q5VU21_H<br>UMAN, tr Q63HR1 Q63HR1_HUMAN | KNPL<br>PPSV<br>GVV<br>Dkk | 59% | 27.5 | 48.38093 | Ref | -0.15 | -0.3 | -0.21 | -0.14 | 0.16 | -0.69 | -0.03 | 28500 | 19800 | 19300 | 23100 | 26700 | 28800 | 16600 | 26100 | 566.4 | 2261.4 | 4 | 0.0082 | 3.621 |
| Plasminogen<br>activator inhibitor 1<br>RNA-binding<br>protein OS=Homo<br>sapiens GN=SERBP1<br>PE=1 SV=2 | sp Q8NC51 PAIRB_HUMAN, tr A1L5B7 A1L5B7_BOVIN, tr F1MFK6 F1MFK6_BOVIN, tr F6WZG6 F6WZG6_MACMU, tr F7EEX7 F7EEX7_C<br>ALJA, tr Q4R9B0 Q4R9B0_M<br>ACFA, tr Q4R9B2 Q4R9B2_M<br>ACFA, tr Q5VU21 Q5VU21_H<br>UMAN, tr Q63HR1 Q63HR1_HUMAN | KNPL<br>PPSV<br>GVV<br>Dkk | 55% | 21.6 | 46.68684 | Ref | -0.25 | -0.3 | 0.023 | -0.13 | 0.17 | -0.47 | -0.03 | 18400 | 14500 | 15200 | 21400 | 21100 | 22800 | 15200 | 20600 | 539.7 | 2693.6 | 5 | 0.0507 | 18.83 |

|                                                                                           |                                                                                                                                                                                                                          |                                         |     |      |          |     |       |       |       |       |       |       |       |      |      |      |      |      |      |      |      |       |        |   |        |       |
|-------------------------------------------------------------------------------------------|--------------------------------------------------------------------------------------------------------------------------------------------------------------------------------------------------------------------------|-----------------------------------------|-----|------|----------|-----|-------|-------|-------|-------|-------|-------|-------|------|------|------|------|------|------|------|------|-------|--------|---|--------|-------|
| Plasminogen activator inhibitor 1 RNA-binding protein OS=Homo sapiens GN=SERBP1 PE=1 SV=2 | sp Q8NC51 PAIRB_HUMAN, tr A1L5B7 A1L5B7_BOVIN, tr F1MFK6 F1MFK6_BOVIN, tr F6WZG6 F6WZG6_MACMU, tr F7EEX7 F7EEX7_C ALJA, tr Q4R9B0 Q4R9B0_M ACFA, tr Q4R9B2 Q4R9B2_M ACFA, tr Q5VU21 Q5VU21_HUMAN, tr Q63HR1 Q63HR1_HUMAN | kPA<br>NDIT<br>SQLE<br>INFG<br>DLG<br>R | 95% | 56   | 54.89431 | Ref | -0.15 | 0.068 | -0.17 | -0.25 | 0.085 | -0.5  | -0.09 | 4610 | 3770 | 4770 | 4540 | 4720 | 5210 | 3630 | 4770 | 899.5 | 2695.5 | 3 | 0.0242 | 8.981 |
| Plasminogen activator inhibitor 1 RNA-binding protein OS=Homo sapiens GN=SERBP1 PE=1 SV=2 | sp Q8NC51 PAIRB_HUMAN, tr A1L5B7 A1L5B7_BOVIN, tr F1MFK6 F1MFK6_BOVIN, tr F6WZG6 F6WZG6_MACMU, tr F7EEX7 F7EEX7_C ALJA, tr Q4R9B0 Q4R9B0_M ACFA, tr Q4R9B2 Q4R9B2_M ACFA, tr Q5VU21 Q5VU21_HUMAN, tr Q63HR1 Q63HR1_HUMAN | kPA<br>NDIT<br>SQLE<br>INFG<br>DLG<br>R | 74% | 39.2 | 54.87273 | Ref | -0.33 | -0.06 | 0.046 | -0.37 | -0.01 | -0.37 | 0.09  | 2280 | 1670 | 2190 | 2640 | 2180 | 2440 | 1990 | 2720 | 899.5 | 2695.5 | 3 | 0.0227 | 8.435 |

|                                                                                           |                                                                                                                                                                                                                          |                     |     |      |          |     |        |       |       |       |       |       |       |      |      |      |      |      |      |      |      |       |        |   |        |       |
|-------------------------------------------------------------------------------------------|--------------------------------------------------------------------------------------------------------------------------------------------------------------------------------------------------------------------------|---------------------|-----|------|----------|-----|--------|-------|-------|-------|-------|-------|-------|------|------|------|------|------|------|------|------|-------|--------|---|--------|-------|
| Plasminogen activator inhibitor 1 RNA-binding protein OS=Homo sapiens GN=SERBP1 PE=1 SV=2 | sp Q8NC51 PAIRB_HUMAN, tr A1L5B7 A1L5B7_BOVIN, tr F1MFK6 F1MFK6_BOVIN, tr F6WZG6 F6WZG6_MACMU, tr F7EEX7 F7EEX7_C ALJA, tr Q4R9B0 Q4R9B0_M ACFA, tr Q4R9B2 Q4R9B2_M ACFA, tr Q5VU21 Q5VU21_HUMAN, tr Q63HR1 Q63HR1_HUMAN | kPANDITSQLFINFGDLGR | 95% | 60.5 | 54.85212 | Ref | -0.23  | -0.46 | 0.27  | -0.14 | 0.18  | -0.79 | -0.3  | 6570 | 4370 | 4040 | 7530 | 6260 | 6830 | 3620 | 5060 | 899.5 | 2695.5 | 3 | 0.0222 | 8.235 |
| Plasminogen activator inhibitor 1 RNA-binding protein OS=Homo sapiens GN=SERBP1 PE=1 SV=2 | sp Q8NC51 PAIRB_HUMAN, tr A1L5B7 A1L5B7_BOVIN, tr F1MFK6 F1MFK6_BOVIN, tr F6WZG6 F6WZG6_MACMU, tr F7EEX7 F7EEX7_C ALJA, tr Q4R9B0 Q4R9B0_M ACFA, tr Q4R9B2 Q4R9B2_M ACFA, tr Q5VU21 Q5VU21_HUMAN, tr Q63HR1 Q63HR1_HUMAN | kPANDITSQLFINFGDLGR | 94% | 49.4 | 54.69044 | Ref | -0.035 | -0.24 | -0.02 | -0.4  | 0.099 | -0.61 | 0.036 | 4300 | 3610 | 3390 | 4450 | 3760 | 4640 | 2980 | 4610 | 674.9 | 2695.5 | 4 | 0.0128 | 4.748 |

|                                                                                           |                                                                                                                                                                                                                          |                                         |     |    |          |     |       |       |       |        |       |       |       |       |       |       |       |       |       |       |       |       |        |   |        |       |
|-------------------------------------------------------------------------------------------|--------------------------------------------------------------------------------------------------------------------------------------------------------------------------------------------------------------------------|-----------------------------------------|-----|----|----------|-----|-------|-------|-------|--------|-------|-------|-------|-------|-------|-------|-------|-------|-------|-------|-------|-------|--------|---|--------|-------|
| Plasminogen activator inhibitor 1 RNA-binding protein OS=Homo sapiens GN=SERBP1 PE=1 SV=2 | sp Q8NC51 PAIRB_HUMAN, tr A1L5B7 A1L5B7_BOVIN, tr F1MFK6 F1MFK6_BOVIN, tr F6WZG6 F6WZG6_MACMU, tr F7EEX7 F7EEX7_C ALJA, tr Q4R9B0 Q4R9B0_M ACFA, tr Q4R9B2 Q4R9B2_M ACFA, tr Q5VU21 Q5VU21_HUMAN, tr Q63HR1 Q63HR1_HUMAN | kPAn<br>DITS<br>QLEI<br>NFG<br>DLG<br>R | 91% | 48 | 55.12865 | Ref | 0.066 | -0.04 | -0.11 | -0.094 | 0.018 | -0.7  | -0.16 | 833   | 822   | 831   | 885   | 988   | 932   | 593   | 856   | 899.8 | 2696.4 | 3 | 0.0249 | 9.226 |
| Plasminogen activator inhibitor 1 RNA-binding protein OS=Homo sapiens GN=SERBP1 PE=1 SV=2 | sp Q8NC51 PAIRB_HUMAN, tr A1L5B7 A1L5B7_BOVIN, tr F1MFK6 F1MFK6_BOVIN, tr F6WZG6 F6WZG6_MACMU, tr F7EEX7 F7EEX7_C ALJA, tr Q4R9B0 Q4R9B0_M ACFA, tr Q4R9B2 Q4R9B2_M ACFA, tr Q5VU21 Q5VU21_HUMAN, tr Q63HR1 Q63HR1_HUMAN | kPnE<br>GAD<br>GQ<br>Wk                 | 69% | 37 | 53.97997 | Ref | -0.36 | -0.36 | 0.017 | -0.16  | 0.29  | -0.91 | 0.097 | 23000 | 14800 | 16100 | 23500 | 22800 | 27300 | 12400 | 24800 | 715.1 | 2142.2 | 3 | 0.0083 | 3.89  |

|                                                                                           |                                                                                                                                                                                                                          |                                 |     |      |          |     |        |       |       |       |       |       |       |       |       |       |       |       |       |       |       |       |      |   |        |       |
|-------------------------------------------------------------------------------------------|--------------------------------------------------------------------------------------------------------------------------------------------------------------------------------------------------------------------------|---------------------------------|-----|------|----------|-----|--------|-------|-------|-------|-------|-------|-------|-------|-------|-------|-------|-------|-------|-------|-------|-------|------|---|--------|-------|
| Plasminogen activator inhibitor 1 RNA-binding protein OS=Homo sapiens GN=SERBP1 PE=1 SV=2 | sp Q8NC51 PAIRB_HUMAN, tr A1L5B7 A1L5B7_BOVIN, tr F1MFK6 F1MFK6_BOVIN, tr F6WZG6 F6WZG6_MACMU, tr F7EEX7 F7EEX7_C ALJA, tr Q4R9B0 Q4R9B0_M ACFA, tr Q4R9B2 Q4R9B2_M ACFA, tr Q5VU21 Q5VU21_HUMAN, tr Q63HR1 Q63HR1_HUMAN | pGH<br>LQE<br>GFG<br>cVVT<br>NR | 95% | 57.5 | 52.10037 | Ref | -0.15  | -0.44 | 0.14  | -0.22 | 0.13  | -0.48 | -0.13 | 9250  | 7180  | 6390  | 10700 | 9220  | 10300 | 6990  | 8830  | 655.3 | 1963 | 3 | 0.0113 | 5.744 |
| Plasminogen activator inhibitor 1 RNA-binding protein OS=Homo sapiens GN=SERBP1 PE=1 SV=2 | sp Q8NC51 PAIRB_HUMAN, tr A1L5B7 A1L5B7_BOVIN, tr F1MFK6 F1MFK6_BOVIN, tr F6WZG6 F6WZG6_MACMU, tr F7EEX7 F7EEX7_C ALJA, tr Q4R9B0 Q4R9B0_M ACFA, tr Q4R9B2 Q4R9B2_M ACFA, tr Q5VU21 Q5VU21_HUMAN, tr Q63HR1 Q63HR1_HUMAN | pGH<br>LQE<br>GFG<br>cVVT<br>NR | 58% | 33   | 52.21907 | Ref | -0.014 | -0.22 | -0.11 | -0.21 | -0.18 | -0.1  | -0.06 | 13500 | 12800 | 12000 | 14500 | 15000 | 13400 | 14800 | 15000 | 655.3 | 1963 | 3 | 0.0087 | 4.43  |

|                                                                                           |                                                                                                                                                                                                                          |                                      |     |      |          |     |       |       |       |       |      |       |      |      |      |      |      |      |      |      |      |       |        |   |        |       |
|-------------------------------------------------------------------------------------------|--------------------------------------------------------------------------------------------------------------------------------------------------------------------------------------------------------------------------|--------------------------------------|-----|------|----------|-----|-------|-------|-------|-------|------|-------|------|------|------|------|------|------|------|------|------|-------|--------|---|--------|-------|
| Plasminogen activator inhibitor 1 RNA-binding protein OS=Homo sapiens GN=SERBP1 PE=1 SV=2 | sp Q8NC51 PAIRB_HUMAN, tr A1L5B7 A1L5B7_BOVIN, tr F1MFK6 F1MFK6_BOVIN, tr F6WZG6 F6WZG6_MACMU, tr F7EEX7 F7EEX7_C ALJA, tr Q4R9B0 Q4R9B0_M ACFA, tr Q4R9B2 Q4R9B2_M ACFA, tr Q5VU21 Q5VU21_HUMAN, tr Q63HR1 Q63HR1_HUMAN | SAA<br>QAA<br>AQT<br>NSN<br>AAG<br>k | 95% | 56.8 | 54.20263 | Ref | -0.83 | -0.24 | 0.15  | -0.13 | 0.46 | -1.2  | 0.17 | 6220 | 3140 | 5130 | 7550 | 6870 | 8980 | 3000 | 7640 | 1035  | 2068.1 | 2 | 0.03   | 14.5  |
| Plasminogen activator inhibitor 1 RNA-binding protein OS=Homo sapiens GN=SERBP1 PE=1 SV=2 | sp Q8NC51 PAIRB_HUMAN, tr A1L5B7 A1L5B7_BOVIN, tr F1MFK6 F1MFK6_BOVIN, tr F6WZG6 F6WZG6_MACMU, tr F7EEX7 F7EEX7_C ALJA, tr Q4R9B0 Q4R9B0_M ACFA, tr Q4R9B2 Q4R9B2_M ACFA, tr Q5VU21 Q5VU21_HUMAN, tr Q63HR1 Q63HR1_HUMAN | SAA<br>QAA<br>AQT<br>NSN<br>AAG<br>k | 95% | 58.9 | 54.10244 | Ref | -0.35 | 0.06  | -0.12 | -0.27 | 0.2  | -0.79 | 0.14 | 5110 | 3780 | 5450 | 5390 | 5370 | 6480 | 3420 | 6470 | 690.4 | 2068.1 | 3 | 0.0137 | 6.636 |

|                                                                                                          |                                                                                                                                                                                                                                       |                                      |     |      |          |     |       |       |       |       |       |       |      |       |       |       |       |       |       |       |       |       |        |   |        |       |
|----------------------------------------------------------------------------------------------------------|---------------------------------------------------------------------------------------------------------------------------------------------------------------------------------------------------------------------------------------|--------------------------------------|-----|------|----------|-----|-------|-------|-------|-------|-------|-------|------|-------|-------|-------|-------|-------|-------|-------|-------|-------|--------|---|--------|-------|
| Plasminogen<br>activator inhibitor 1<br>RNA-binding<br>protein OS=Homo<br>sapiens GN=SERBP1<br>PE=1 SV=2 | sp Q8NC51 PAIRB_HUMAN, tr A1L5B7 A1L5B7_BOVIN, tr F1MFK6 F1MFK6_BOVIN, tr F6WZG6 F6WZG6_MACMU, tr F7EEX7 F7EEX7_C<br>ALJA, tr Q4R9B0 Q4R9B0_M<br>ACFA, tr Q4R9B2 Q4R9B2_M<br>ACFA, tr Q5VU21 Q5VU21_H<br>UMAN, tr Q63HR1 Q63HR1_HUMAN | sAA<br>QAA<br>AQT<br>nSN<br>AAG<br>k | 95% | 66.9 | 53.94951 | Ref | 0.14  | -0.35 | -0.12 | -0.37 | -0.07 | -0.53 | 0.14 | 1720  | 1640  | 1280  | 1670  | 1550  | 1670  | 1260  | 2000  | 690.7 | 2069.1 | 3 | 0.0224 | 10.84 |
| Plasminogen<br>activator inhibitor 1<br>RNA-binding<br>protein OS=Homo<br>sapiens GN=SERBP1<br>PE=1 SV=2 | sp Q8NC51 PAIRB_HUMAN, tr A1L5B7 A1L5B7_BOVIN, tr F1MFK6 F1MFK6_BOVIN, tr F6WZG6 F6WZG6_MACMU, tr F7EEX7 F7EEX7_C<br>ALJA, tr Q4R9B0 Q4R9B0_M<br>ACFA, tr Q4R9B2 Q4R9B2_M<br>ACFA, tr Q5VU21 Q5VU21_H<br>UMAN, tr Q63HR1 Q63HR1_HUMAN | sAA<br>QAA<br>AQT<br>nSN<br>AAG<br>k | 95% | 61.8 | 53.99403 | Ref | -0.61 | -0.43 | -0.1  | -0.28 | 0.22  | -0.48 | 0.57 | 16000 | 11200 | 13800 | 19400 | 18900 | 23400 | 15000 | 30900 | 690.7 | 2069.1 | 3 | 0.0164 | 7.928 |

|                                                                                                          |                                                                                                                                                                                                                                       |                                      |     |      |          |     |       |       |       |       |      |       |       |       |       |       |       |       |       |       |       |       |        |   |        |       |
|----------------------------------------------------------------------------------------------------------|---------------------------------------------------------------------------------------------------------------------------------------------------------------------------------------------------------------------------------------|--------------------------------------|-----|------|----------|-----|-------|-------|-------|-------|------|-------|-------|-------|-------|-------|-------|-------|-------|-------|-------|-------|--------|---|--------|-------|
| Plasminogen<br>activator inhibitor 1<br>RNA-binding<br>protein OS=Homo<br>sapiens GN=SERBP1<br>PE=1 SV=2 | sp Q8NC51 PAIRB_HUMAN, tr A1L5B7 A1L5B7_BOVIN, tr F1MFK6 F1MFK6_BOVIN, tr F6WZG6 F6WZG6_MACMU, tr F7EEX7 F7EEX7_C<br>ALJA, tr Q4R9B0 Q4R9B0_M<br>ACFA, tr Q4R9B2 Q4R9B2_M<br>ACFA, tr Q5VU21 Q5VU21_H<br>UMAN, tr Q63HR1 Q63HR1_HUMAN | sAA<br>QAA<br>AQT<br>nSN<br>AAG<br>k | 95% | 63.2 | 53.98856 | Ref | -0.59 | 0.094 | -0.02 | -0.22 | 0.26 | -0.81 | 0.099 | 35300 | 22100 | 38500 | 39900 | 38200 | 46700 | 23200 | 43300 | 690.7 | 2069.1 | 3 | 0.0161 | 7.754 |
| Plasminogen<br>activator inhibitor 1<br>RNA-binding<br>protein OS=Homo<br>sapiens GN=SERBP1<br>PE=1 SV=2 | sp Q8NC51 PAIRB_HUMAN, tr A1L5B7 A1L5B7_BOVIN, tr F1MFK6 F1MFK6_BOVIN, tr F6WZG6 F6WZG6_MACMU, tr F7EEX7 F7EEX7_C<br>ALJA, tr Q4R9B0 Q4R9B0_M<br>ACFA, tr Q4R9B2 Q4R9B2_M<br>ACFA, tr Q5VU21 Q5VU21_H<br>UMAN, tr Q63HR1 Q63HR1_HUMAN | sAA<br>QAA<br>AQT<br>nSN<br>AAG<br>k | 85% | 42.6 | 54.01128 | Ref | 0.042 | 0.78  | -0.59 | -0.29 | -0.3 | -0.54 | -0.32 | 6320  | 7070  | 12800 | 5560  | 7560  | 6540  | 5780  | 6670  | 690.7 | 2069.1 | 3 | 0.0149 | 7.218 |



|                                                                                                          |                                                                                                                                                                                                                                       |                                      |     |      |          |     |       |       |       |       |      |       |       |       |      |       |       |       |       |      |       |       |        |   |        |       |
|----------------------------------------------------------------------------------------------------------|---------------------------------------------------------------------------------------------------------------------------------------------------------------------------------------------------------------------------------------|--------------------------------------|-----|------|----------|-----|-------|-------|-------|-------|------|-------|-------|-------|------|-------|-------|-------|-------|------|-------|-------|--------|---|--------|-------|
| Plasminogen<br>activator inhibitor 1<br>RNA-binding<br>protein OS=Homo<br>sapiens GN=SERBP1<br>PE=1 SV=2 | sp Q8NC51 PAIRB_HUMAN, tr A1L5B7 A1L5B7_BOVIN, tr F1MFK6 F1MFK6_BOVIN, tr F6WZG6 F6WZG6_MACMU, tr F7EEX7 F7EEX7_C<br>ALJA, tr Q4R9B0 Q4R9B0_M<br>ACFA, tr Q4R9B2 Q4R9B2_M<br>ACFA, tr Q5VU21 Q5VU21_H<br>UMAN, tr Q63HR1 Q63HR1_HUMAN | sAA<br>QAA<br>AQT<br>NSn<br>AAG<br>k | 95% | 86.8 | 53.97509 | Ref | -0.28 | -0.26 | -0.16 | -0.38 | 0.15 | -0.15 | 0.059 | 1980  | 1480 | 1620  | 1960  | 1850  | 2340  | 1980 | 2270  | 690.7 | 2069.1 | 3 | 0.027  | 13.06 |
| Plasminogen<br>activator inhibitor 1<br>RNA-binding<br>protein OS=Homo<br>sapiens GN=SERBP1<br>PE=1 SV=2 | sp Q8NC51 PAIRB_HUMAN, tr A1L5B7 A1L5B7_BOVIN, tr F1MFK6 F1MFK6_BOVIN, tr F6WZG6 F6WZG6_MACMU, tr F7EEX7 F7EEX7_C<br>ALJA, tr Q4R9B0 Q4R9B0_M<br>ACFA, tr Q4R9B2 Q4R9B2_M<br>ACFA, tr Q5VU21 Q5VU21_H<br>UMAN, tr Q63HR1 Q63HR1_HUMAN | sAA<br>QAA<br>AQT<br>NSn<br>AAG<br>k | 95% | 59.2 | 53.95194 | Ref | -0.37 | -0.08 | 0.027 | -0.37 | 0.26 | -0.71 | 0.084 | 11500 | 8120 | 10800 | 13000 | 10900 | 14700 | 7870 | 13500 | 690.7 | 2069.1 | 3 | 0.0221 | 10.67 |

|                                                                                                          |                                                                                                                                                                                                                                       |                                  |     |      |          |     |       |       |       |       |      |       |      |       |       |       |       |       |       |       |       |     |        |   |        |       |
|----------------------------------------------------------------------------------------------------------|---------------------------------------------------------------------------------------------------------------------------------------------------------------------------------------------------------------------------------------|----------------------------------|-----|------|----------|-----|-------|-------|-------|-------|------|-------|------|-------|-------|-------|-------|-------|-------|-------|-------|-----|--------|---|--------|-------|
| Plasminogen<br>activator inhibitor 1<br>RNA-binding<br>protein OS=Homo<br>sapiens GN=SERBP1<br>PE=1 SV=2 | sp Q8NC51 PAIRB_HUMAN, tr A1L5B7 A1L5B7_BOVIN, tr F1MFK6 F1MFK6_BOVIN, tr F6WZG6 F6WZG6_MACMU, tr F7EEX7 F7EEX7_C<br>ALJA, tr Q4R9B0 Q4R9B0_M<br>ACFA, tr Q4R9B2 Q4R9B2_M<br>ACFA, tr Q5VU21 Q5VU21_H<br>UMAN, tr Q63HR1 Q63HR1_HUMAN | sAA<br>QAA<br>AQT<br>nSnA<br>AGk | 88% | 44.2 | 53.63858 | Ref | -0.34 | -0.06 | -0.13 | -0.1  | 0.18 | -0.59 | -0.1 | 33800 | 23200 | 30500 | 32500 | 36500 | 38900 | 23800 | 33100 | 691 | 2070.1 | 3 | 0.0179 | 8.652 |
| Plasminogen<br>activator inhibitor 1<br>RNA-binding<br>protein OS=Homo<br>sapiens GN=SERBP1<br>PE=1 SV=2 | sp Q8NC51 PAIRB_HUMAN, tr A1L5B7 A1L5B7_BOVIN, tr F1MFK6 F1MFK6_BOVIN, tr F6WZG6 F6WZG6_MACMU, tr F7EEX7 F7EEX7_C<br>ALJA, tr Q4R9B0 Q4R9B0_M<br>ACFA, tr Q4R9B2 Q4R9B2_M<br>ACFA, tr Q5VU21 Q5VU21_H<br>UMAN, tr Q63HR1 Q63HR1_HUMAN | sAA<br>QAA<br>AQT<br>nSnA<br>AGk | 95% | 58   | 53.6523  | Ref | -0.54 | -0.15 | -0.07 | -0.14 | 0.29 | -0.5  | 0.18 | 22000 | 16000 | 22800 | 27000 | 28400 | 33200 | 20100 | 32000 | 691 | 2070.1 | 3 | 0.0168 | 8.13  |

|                                                                       |                                                                                                                                                                                                                                                           |         |     |      |          |     |       |       |       |        |       |       |       |       |        |       |        |        |       |       |        |       |        |   |        |       |
|-----------------------------------------------------------------------|-----------------------------------------------------------------------------------------------------------------------------------------------------------------------------------------------------------------------------------------------------------|---------|-----|------|----------|-----|-------|-------|-------|--------|-------|-------|-------|-------|--------|-------|--------|--------|-------|-------|--------|-------|--------|---|--------|-------|
| Myosin light polypeptide 6<br>OS=Homo sapiens<br>GN=MYL6 PE=1<br>SV=2 | 0 MYL6_HUMAN,sp P60661 MYL6_BOVIN,sp P60662 MYL6_PIG,sp Q5R844 MYL6_PONAB,sp Q60605 MYL6_MOUSE,sp Q64119 MYL6_RAT,transcript B0FZM4 B0FZM4_SHEEP,transcript B2GV99 B2GV99_RAT,transcript B7Z6Z4 B7Z6Z4_HUMAN,transcript D2H345 D2H345_AILME,transcript D3 | aLGEVlk | 72% | 36.7 | 52.86564 | Ref | -0.66 | 0.028 | -0.25 | -0.22  | -0.09 | -0.33 | -0.31 | 3E+05 | 179000 | 3E+05 | 290000 | 325000 | 3E+05 | 3E+05 | 276000 | 655   | 1962.1 | 3 | 0.0231 | 11.78 |
| Myosin light polypeptide 6<br>OS=Homo sapiens<br>GN=MYL6 PE=1<br>SV=2 | 0 MYL6_HUMAN,sp P60661 MYL6_BOVIN,sp P60662 MYL6_PIG,sp Q5R844 MYL6_PONAB,sp Q60605 MYL6_MOUSE,sp Q64119 MYL6_RAT,transcript B0FZM4 B0FZM4_SHEEP,transcript B2GV99 B2GV99_RAT,transcript B7Z6Z4 B7Z6Z4_HUMAN,transcript D2H345 D2H345_AILME,transcript D3 | aLGEVlk | 95% | 51.9 | 52.3979  | Ref | -0.79 | 0.026 | -0.44 | -0.051 | 0.011 | -0.39 | -0.15 | 15900 | 8510   | 16300 | 13200  | 19100  | 17400 | 13800 | 16100  | 982.1 | 1962.1 | 2 | 0.0056 | 2.848 |

|                                                                       |                                                                                                                                                                                                                                                           |         |     |      |          |     |       |       |       |        |      |      |       |       |       |       |       |       |       |       |       |       |        |   |        |       |
|-----------------------------------------------------------------------|-----------------------------------------------------------------------------------------------------------------------------------------------------------------------------------------------------------------------------------------------------------|---------|-----|------|----------|-----|-------|-------|-------|--------|------|------|-------|-------|-------|-------|-------|-------|-------|-------|-------|-------|--------|---|--------|-------|
| Myosin light polypeptide 6<br>OS=Homo sapiens<br>GN=MYL6 PE=1<br>SV=2 | 0 MYL6_HUMAN,sp P60661 MYL6_BOVIN,sp P60662 MYL6_PIG,sp Q5R844 MYL6_PONAB,sp Q60605 MYL6_MOUSE,sp Q64119 MYL6_RAT,transcript B0FZM4 B0FZM4_SHEEP,transcript B2GV99 B2GV99_RAT,transcript B7Z6Z4 B7Z6Z4_HUMAN,transcript D2H345 D2H345_AILME,transcript D3 | aLGNPNA | 95% | 64   | 52.909   | Ref | -0.56 | 0.048 | -0.58 | -0.027 | 0.12 | -0.3 | -0.49 | 5650  | 3580  | 5900  | 4280  | 6930  | 6710  | 5230  | 4560  | 982.1 | 1962.1 | 2 | 0.0184 | 9.378 |
| Myosin light polypeptide 6<br>OS=Homo sapiens<br>GN=MYL6 PE=1<br>SV=2 | 0 MYL6_HUMAN,sp P60661 MYL6_BOVIN,sp P60662 MYL6_PIG,sp Q5R844 MYL6_PONAB,sp Q60605 MYL6_MOUSE,sp Q64119 MYL6_RAT,transcript B0FZM4 B0FZM4_SHEEP,transcript B2GV99 B2GV99_RAT,transcript B7Z6Z4 B7Z6Z4_HUMAN,transcript D2H345 D2H345_AILME,transcript D3 | aLGNPNA | 93% | 48.4 | 52.82026 | Ref | -0.35 | -0.09 | -0.62 | -0.12  | -0.1 | -0.2 | -0.28 | 44000 | 30300 | 39600 | 30800 | 47800 | 42500 | 41300 | 38700 | 655   | 1962.1 | 3 | 0.018  | 9.167 |

|                                                                       |                                                                                                                                                                                                                                  |          |     |      |          |     |       |       |       |       |       |       |       |       |       |       |       |       |       |       |       |       |        |   |        |       |
|-----------------------------------------------------------------------|----------------------------------------------------------------------------------------------------------------------------------------------------------------------------------------------------------------------------------|----------|-----|------|----------|-----|-------|-------|-------|-------|-------|-------|-------|-------|-------|-------|-------|-------|-------|-------|-------|-------|--------|---|--------|-------|
| Myosin light polypeptide 6<br>OS=Homo sapiens<br>GN=MYL6 PE=1<br>SV=2 | 0 MYL6_HUMAN,sp P60661 MYL6_BOVIN,sp P60662 MYL6_PIG,sp Q5R844 MYL6_PONAB,sp Q60605 MYL6_MOUSE,sp Q64119 MYL6_RAT,trans B0FZM4 B0FZM4_SHEEP,trans B2GV99 B2GV99_RAT,trans B7Z6Z4 B7Z6Z4_HUMAN,trans D2H345 D2H345_AILME,trans D3 | aLGNPnAE | 94% | 50.3 | 53.15777 | Ref | -0.59 | -0.07 | -0.55 | -0.2  | -0.09 | -0.21 | -0.09 | 29300 | 17100 | 26600 | 21400 | 30000 | 28300 | 27200 | 29300 | 655.4 | 1963.1 | 3 | 0.0151 | 7.67  |
| Myosin light polypeptide 6<br>OS=Homo sapiens<br>GN=MYL6 PE=1<br>SV=2 | 0 MYL6_HUMAN,sp P60661 MYL6_BOVIN,sp P60662 MYL6_PIG,sp Q5R844 MYL6_PONAB,sp Q60605 MYL6_MOUSE,sp Q64119 MYL6_RAT,trans B0FZM4 B0FZM4_SHEEP,trans B2GV99 B2GV99_RAT,trans B7Z6Z4 B7Z6Z4_HUMAN,trans D2H345 D2H345_AILME,trans D3 | aLGNPnAE | 95% | 52.1 | 53.09547 | Ref | -0.71 | 0.046 | -0.54 | -0.06 | -0.04 | -0.31 | -0.21 | 6030  | 3290  | 6020  | 4490  | 6920  | 6140  | 5310  | 5630  | 982.6 | 1963.1 | 2 | 0.0136 | 6.944 |

|                                                                       |                                                                                                                                                                                                                      |                    |     |      |          |     |                           |       |                            |        |       |       |       |       |                           |       |                            |       |       |       |       |       |        |   |        |       |
|-----------------------------------------------------------------------|----------------------------------------------------------------------------------------------------------------------------------------------------------------------------------------------------------------------|--------------------|-----|------|----------|-----|---------------------------|-------|----------------------------|--------|-------|-------|-------|-------|---------------------------|-------|----------------------------|-------|-------|-------|-------|-------|--------|---|--------|-------|
| Myosin light polypeptide 6<br>OS=Homo sapiens<br>GN=MYL6 PE=1<br>SV=2 | 0 MYL6_HUMAN,sp P60661 MYL6_BOVIN,sp P60662 MYL6_PIG,sp Q5R844 MYL6_PONAB,sp Q60605 MYL6_MOUSE,sp Q64119 MYL6_RAT,sp B0FZM4 B0FZM4_SHEEP,sp B2GV99 B2GV99_RAT,sp B7Z6Z4 B7Z6Z4_HUMAN,sp D2H345 D2H345_AILME,sp D3GLR | dQG<br>TYED<br>YVE | 95% | 49.4 | 50.61615 | Ref | -0.27                     | 0.18  | -0.61                      | -0.24  | -0.19 | -0.49 | -0.52 | 18600 | 11600                     | 17200 | 11200                      | 15800 | 14300 | 12200 | 11800 | 924.9 | 1847.9 | 2 | 0.0127 | 6.85  |
| Myosin light polypeptide 6<br>OS=Homo sapiens<br>GN=MYL6 PE=1<br>SV=2 | 0 MYL6_HUMAN,sp P60661 MYL6_BOVIN,sp P60662 MYL6_PIG,sp Q5R844 MYL6_PONAB,sp Q60605 MYL6_MOUSE,sp Q64119 MYL6_RAT,sp B0FZM4 B0FZM4_SHEEP,sp B2GV99 B2GV99_RAT,sp B7Z6Z4 B7Z6Z4_HUMAN,sp D2H345 D2H345_AILME,sp D3QLF | eAF<br>QLF         | 90% | 43.3 | 51.12109 | Ref | Value Missing (-0.403940) | -0.01 | Value Missing (-0.6882284) | -0.049 | -0.08 | -0.6  | 0.12  | 75404 | Value Missing (-0.403940) | 8070  | Value Missing (-0.6882284) | 9700  | 8300  | 6050  | 9870  | 443.9 | 1328.7 | 3 | 0.0098 | 7.336 |

|                                                                       |                                                                                                                                                                                                                                   |              |     |      |          |     |       |       |       |      |       |       |       |       |      |       |      |       |       |       |      |       |      |   |        |       |
|-----------------------------------------------------------------------|-----------------------------------------------------------------------------------------------------------------------------------------------------------------------------------------------------------------------------------|--------------|-----|------|----------|-----|-------|-------|-------|------|-------|-------|-------|-------|------|-------|------|-------|-------|-------|------|-------|------|---|--------|-------|
| Myosin light polypeptide 6<br>OS=Homo sapiens<br>GN=MYL6 PE=1<br>SV=2 | 0 MYL6_HUMAN,sp P60661 MYL6_BOVIN,sp P60662 MYL6_PIG,sp Q5R844 MYL6_PONAB,sp Q60605 MYL6_MOUSE,sp Q64119 MYL6_RAT,trans B0FZM4 B0FZM4_SHEEP,trans B2GV99 B2GV99_RAT,trans B7Z6Z4 B7Z6Z4_HUMAN,trans D2H345 D2H345_AILME,trans D3k | hVLV<br>TLGE | 56% | 28.6 | 50.03223 | Ref | -0.39 | 0.097 | -0.71 | -0.1 | -0.02 | -0.34 | -0.45 | 13200 | 8560 | 13000 | 8350 | 14000 | 12900 | 10800 | 9950 | 401.7 | 1603 | 4 | 0.025  | 15.61 |
| Myosin light polypeptide 6<br>OS=Homo sapiens<br>GN=MYL6 PE=1<br>SV=2 | 0 MYL6_HUMAN,sp P60661 MYL6_BOVIN,sp P60662 MYL6_PIG,sp Q5R844 MYL6_PONAB,sp Q60605 MYL6_MOUSE,sp Q64119 MYL6_RAT,trans B0FZM4 B0FZM4_SHEEP,trans B2GV99 B2GV99_RAT,trans B7Z6Z4 B7Z6Z4_HUMAN,trans D2H345 D2H345_AILME,trans D3k | hVLV<br>TLGE | 83% | 36.3 | 49.81094 | Ref | -0.4  | 0.087 | -0.47 | -0.2 | -0.03 | -0.42 | -0.32 | 9810  | 6660 | 10200 | 7750 | 10300 | 10100 | 8070  | 8560 | 802.5 | 1603 | 2 | 0.0168 | 10.49 |

|                                                                       |                                                                                                                                                                                                                                   |              |     |      |          |     |       |       |       |       |       |       |       |       |       |       |       |       |       |       |       |       |      |   |        |       |
|-----------------------------------------------------------------------|-----------------------------------------------------------------------------------------------------------------------------------------------------------------------------------------------------------------------------------|--------------|-----|------|----------|-----|-------|-------|-------|-------|-------|-------|-------|-------|-------|-------|-------|-------|-------|-------|-------|-------|------|---|--------|-------|
| Myosin light polypeptide 6<br>OS=Homo sapiens<br>GN=MYL6 PE=1<br>SV=2 | 0 MYL6_HUMAN,sp P60661 MYL6_BOVIN,sp P60662 MYL6_PIG,sp Q5R844 MYL6_PONAB,sp Q60605 MYL6_MOUSE,sp Q64119 MYL6_RAT,trans B0FZM4 B0FZM4_SHEEP,trans B2GV99 B2GV99_RAT,trans B7Z6Z4 B7Z6Z4_HUMAN,trans D2H345 D2H345_AILME,trans D3k | hVLV<br>TLGE | 94% | 47   | 49.48384 | Ref | -0.36 | 0.12  | -0.58 | -0.12 | -0.19 | -0.41 | -0.33 | 86100 | 56700 | 85300 | 59200 | 89700 | 74500 | 67000 | 70100 | 535.3 | 1603 | 3 | 0.0156 | 9.703 |
| Myosin light polypeptide 6<br>OS=Homo sapiens<br>GN=MYL6 PE=1<br>SV=2 | 0 MYL6_HUMAN,sp P60661 MYL6_BOVIN,sp P60662 MYL6_PIG,sp Q5R844 MYL6_PONAB,sp Q60605 MYL6_MOUSE,sp Q64119 MYL6_RAT,trans B0FZM4 B0FZM4_SHEEP,trans B2GV99 B2GV99_RAT,trans B7Z6Z4 B7Z6Z4_HUMAN,trans D2H345 D2H345_AILME,trans D3k | hVLV<br>TLGE | 82% | 36.2 | 50.00235 | Ref | -0.52 | 0.049 | -0.62 | -0.18 | -0.05 | -0.3  | -0.22 | 13700 | 8240  | 13200 | 9320  | 14000 | 13400 | 11700 | 12300 | 802.5 | 1603 | 2 | 0.0206 | 12.85 |



|                                                                       |                                                                                                                                                                                                                   |              |     |      |          |     |       |       |       |       |       |       |       |       |       |       |       |       |       |       |       |       |      |   |        |       |
|-----------------------------------------------------------------------|-------------------------------------------------------------------------------------------------------------------------------------------------------------------------------------------------------------------|--------------|-----|------|----------|-----|-------|-------|-------|-------|-------|-------|-------|-------|-------|-------|-------|-------|-------|-------|-------|-------|------|---|--------|-------|
| Myosin light polypeptide 6<br>OS=Homo sapiens<br>GN=MYL6 PE=1<br>SV=2 | 0 MYL6_HUMAN,sp P60661 MYL6_BOVIN,sp P60662 MYL6_PIG,sp Q5R844 MYL6_PONAB,sp Q60605 MYL6_MOUSE,sp Q64119 MYL6_RAT,tr B0FZM4 B0FZM4_SHEEP,tr B2GV99 B2GV99_RAT,tr B7Z6Z4 B7Z6Z4_HUMAN,tr D2H345 D2H345_AILME,tr D3 | hVLV<br>TLGE | 95% | 49.5 | 49.3862  | Ref | -0.58 | -0.02 | -0.51 | -0.2  | -0.13 | -0.21 | -0.09 | 33900 | 20300 | 32500 | 25900 | 35400 | 32400 | 32000 | 34700 | 535.3 | 1603 | 3 | 0.0128 | 7.982 |
| Myosin light polypeptide 6<br>OS=Homo sapiens<br>GN=MYL6 PE=1<br>SV=2 | 0 MYL6_HUMAN,sp P60661 MYL6_BOVIN,sp P60662 MYL6_PIG,sp Q5R844 MYL6_PONAB,sp Q60605 MYL6_MOUSE,sp Q64119 MYL6_RAT,tr B0FZM4 B0FZM4_SHEEP,tr B2GV99 B2GV99_RAT,tr B7Z6Z4 B7Z6Z4_HUMAN,tr D2H345 D2H345_AILME,tr D3 | hVLV<br>TLGE | 78% | 32.4 | 48.70819 | Ref | -0.49 | 0.033 | -0.56 | -0.17 | 0.008 | -0.26 | -0.43 | 20400 | 12300 | 19100 | 14200 | 20500 | 20300 | 17500 | 15500 | 401.8 | 1603 | 4 | 0.004  | 2.518 |

|                                                                       |                                                                                                                                                                                                                                   |              |     |      |          |     |       |       |       |       |       |       |       |       |       |       |       |       |       |       |       |       |      |   |        |       |
|-----------------------------------------------------------------------|-----------------------------------------------------------------------------------------------------------------------------------------------------------------------------------------------------------------------------------|--------------|-----|------|----------|-----|-------|-------|-------|-------|-------|-------|-------|-------|-------|-------|-------|-------|-------|-------|-------|-------|------|---|--------|-------|
| Myosin light polypeptide 6<br>OS=Homo sapiens<br>GN=MYL6 PE=1<br>SV=2 | 0 MYL6_HUMAN,sp P60661 MYL6_BOVIN,sp P60662 MYL6_PIG,sp Q5R844 MYL6_PONAB,sp Q60605 MYL6_MOUSE,sp Q64119 MYL6_RAT,trans B0FZM4 B0FZM4_SHEEP,trans B2GV99 B2GV99_RAT,trans B7Z6Z4 B7Z6Z4_HUMAN,trans D2H345 D2H345_AILME,trans D3k | hVLV<br>TLGE | 87% | 37.1 | 48.86045 | Ref | -0.48 | 0.047 | -0.56 | -0.11 | -0.06 | -0.32 | -0.33 | 16000 | 9960  | 15600 | 11400 | 17200 | 15700 | 13600 | 13400 | 802.5 | 1603 | 2 | 0.0072 | 4.481 |
| Myosin light polypeptide 6<br>OS=Homo sapiens<br>GN=MYL6 PE=1<br>SV=2 | 0 MYL6_HUMAN,sp P60661 MYL6_BOVIN,sp P60662 MYL6_PIG,sp Q5R844 MYL6_PONAB,sp Q60605 MYL6_MOUSE,sp Q64119 MYL6_RAT,trans B0FZM4 B0FZM4_SHEEP,trans B2GV99 B2GV99_RAT,trans B7Z6Z4 B7Z6Z4_HUMAN,trans D2H345 D2H345_AILME,trans D3k | hVLV<br>TLGE | 69% | 29.9 | 48.7505  | Ref | -0.36 | 0.013 | -0.59 | -0.17 | -0.04 | -0.47 | -0.38 | 26700 | 16300 | 22900 | 16900 | 25000 | 23900 | 18500 | 19500 | 401.8 | 1603 | 4 | 0.003  | 1.895 |

|                                                                       |                                                                                                                                                                                                                                   |                         |     |      |          |     |      |       |       |       |       |       |       |       |       |       |       |       |       |       |       |       |        |   |        |       |
|-----------------------------------------------------------------------|-----------------------------------------------------------------------------------------------------------------------------------------------------------------------------------------------------------------------------------|-------------------------|-----|------|----------|-----|------|-------|-------|-------|-------|-------|-------|-------|-------|-------|-------|-------|-------|-------|-------|-------|--------|---|--------|-------|
| Myosin light polypeptide 6<br>OS=Homo sapiens<br>GN=MYL6 PE=1<br>SV=2 | 0 MYL6_HUMAN,sp P60661 MYL6_BOVIN,sp P60662 MYL6_PIG,sp Q5R844 MYL6_PONAB,sp Q60605 MYL6_MOUSE,sp Q64119 MYL6_RAT,trans B0FZM4 B0FZM4_SHEEP,trans B2GV99 B2GV99_RAT,trans B7Z6Z4 B7Z6Z4_HUMAN,trans D2H345 D2H345_AILME,trans D3k | hVLV<br>TLGE            | 90% | 40.3 | 49.96394 | Ref | -0.3 | -0.06 | -0.34 | -0.3  | -0.12 | -0.39 | -0.33 | 5260  | 3490  | 4470  | 4130  | 4700  | 4650  | 4010  | 4160  | 401.8 | 1603   | 4 | 0.0182 | 11.35 |
| Myosin light polypeptide 6<br>OS=Homo sapiens<br>GN=MYL6 PE=1<br>SV=2 | 0 MYL6_HUMAN,sp P60661 MYL6_BOVIN,sp P60662 MYL6_PIG,sp Q5R844 MYL6_PONAB,sp Q60605 MYL6_MOUSE,sp Q64119 MYL6_RAT,trans B0FZM4 B0FZM4_SHEEP,trans B2GV99 B2GV99_RAT,trans B7Z6Z4 B7Z6Z4_HUMAN,trans D2H345 D2H345_AILME,trans D3k | iLYS<br>QcG<br>DVM<br>R | 75% | 33.9 | 50.08788 | Ref | -0.4 | 0.098 | -0.47 | -0.14 | -0.23 | -0.34 | -0.37 | 51100 | 32300 | 49400 | 37500 | 51700 | 42500 | 41000 | 39900 | 817.9 | 1633.8 | 2 | 0.0119 | 7.303 |

|                                                                       |                                                                                                                                                                                                                   |                    |   |     |      |          |     |       |       |       |       |       |       |       |      |      |      |      |      |      |      |      |       |        |   |        |       |
|-----------------------------------------------------------------------|-------------------------------------------------------------------------------------------------------------------------------------------------------------------------------------------------------------------|--------------------|---|-----|------|----------|-----|-------|-------|-------|-------|-------|-------|-------|------|------|------|------|------|------|------|------|-------|--------|---|--------|-------|
| Myosin light polypeptide 6<br>OS=Homo sapiens<br>GN=MYL6 PE=1<br>SV=2 | 0 MYL6_HUMAN,sp P60661 MYL6_BOVIN,sp P60662 MYL6_PIG,sp Q5R844 MYL6_PONAB,sp Q60605 MYL6_MOUSE,sp Q64119 MYL6_RAT,sp B0FZM4 B0FZM4_SHEEP,sp B2GV99 B2GV99_RAT,sp B7Z6Z4 B7Z6Z4_HUMAN,sp D2H345 D2H345_AILME,sp D3 | iLYS<br>QcG<br>DVM | R | 95% | 45   | 50.09562 | Ref | -0.43 | 0.051 | -0.46 | -0.25 | -0.14 | -0.34 | -0.23 | 7390 | 4670 | 7070 | 5580 | 7090 | 6670 | 6080 | 6500 | 817.9 | 1633.8 | 2 | 0.0115 | 7.009 |
| Myosin light polypeptide 6<br>OS=Homo sapiens<br>GN=MYL6 PE=1<br>SV=2 | 0 MYL6_HUMAN,sp P60661 MYL6_BOVIN,sp P60662 MYL6_PIG,sp Q5R844 MYL6_PONAB,sp Q60605 MYL6_MOUSE,sp Q64119 MYL6_RAT,sp B0FZM4 B0FZM4_SHEEP,sp B2GV99 B2GV99_RAT,sp B7Z6Z4 B7Z6Z4_HUMAN,sp D2H345 D2H345_AILME,sp D3 | iLYS<br>QcG<br>DVM | R | 93% | 42.7 | 50.24945 | Ref | -0.27 | -0.19 | -0.48 | -0.16 | -0.19 | -0.16 | -0.26 | 1410 | 1040 | 1190 | 1090 | 1490 | 1280 | 1360 | 1270 | 817.9 | 1633.8 | 2 | 0.0064 | 3.939 |

|                                                                       |                                                                                                                                                                                               |                                 |     |    |          |     |        |       |       |       |       |       |       |       |       |       |       |       |       |       |       |       |        |   |        |       |
|-----------------------------------------------------------------------|-----------------------------------------------------------------------------------------------------------------------------------------------------------------------------------------------|---------------------------------|-----|----|----------|-----|--------|-------|-------|-------|-------|-------|-------|-------|-------|-------|-------|-------|-------|-------|-------|-------|--------|---|--------|-------|
| Myosin light polypeptide 6<br>OS=Homo sapiens<br>GN=MYL6 PE=1<br>SV=2 | 0 MYL6_HUMAN,sp P60661 MYL6_BOVIN,sp P60662 MYL6_PIG,sp Q5R844 MYL6_PONAB,sp Q60605 MYL6_MOUSE,sp Q64119 MYL6_RAT,transcript B7Z6Z4 B7Z6Z4_HUMAN,transcript D2H345 D2H345_AILME,transcript D3 | nkD<br>QGT<br>YEDY<br>VEGL<br>R | 85% | 43 | 54.43546 | Ref | -0.35  | -0.07 | -0.55 | -0.15 | 0.056 | -0.47 | -0.26 | 26900 | 18400 | 24200 | 19400 | 28300 | 28500 | 20800 | 23700 | 799.1 | 2394.2 | 3 | 0.0219 | 9.14  |
| Myosin light polypeptide 6<br>OS=Homo sapiens<br>GN=MYL6 PE=1<br>SV=2 | 0 MYL6_HUMAN,sp P60661 MYL6_BOVIN,sp P60662 MYL6_PIG,sp Q5R844 MYL6_PONAB,sp Q60605 MYL6_MOUSE,sp Q64119 MYL6_RAT,transcript B7Z6Z4 B7Z6Z4_HUMAN,transcript D2H345 D2H345_AILME,transcript D3 | nkD<br>QGT<br>YEDY<br>VEGL<br>R | 51% | 34 | 54.44819 | Ref | -0.036 | 0.16  | -0.39 | -0.31 | -0.37 | -0.2  | -0.43 | 10900 | 10700 | 13300 | 10200 | 11900 | 9980  | 11700 | 9880  | 799.1 | 2394.2 | 3 | 0.0204 | 8.527 |

|                                                                       |                                                                                                                                                                                                |                            |     |      |          |     |       |       |       |       |       |       |       |       |       |       |       |       |       |       |       |       |        |   |        |       |
|-----------------------------------------------------------------------|------------------------------------------------------------------------------------------------------------------------------------------------------------------------------------------------|----------------------------|-----|------|----------|-----|-------|-------|-------|-------|-------|-------|-------|-------|-------|-------|-------|-------|-------|-------|-------|-------|--------|---|--------|-------|
| Myosin light polypeptide 6<br>OS=Homo sapiens<br>GN=MYL6 PE=1<br>SV=2 | 0 MYL6_HUMAN,sp P60661 MYL6_BOVIN,sp P60662 MYL6_PIG,sp Q5R844 MYL6_PONAB,sp Q60605 MYL6_MOUSE,sp Q64119 MYL6_RAT,transcript B7Z6Z4 B7Z6Z4_HUMAN,transcript D2H345 D2H345_AILME,transcript D3R | nkD<br>QGT<br>YEDY<br>VEGL | 57% | 32.7 | 54.07868 | Ref | -0.17 | -0.36 | -0.41 | -0.17 | -0.04 | -0.13 | -0.17 | 7210  | 6720  | 6370  | 6900  | 8980  | 8580  | 8410  | 8120  | 599.8 | 2395.2 | 4 | 0.0221 | 9.219 |
| Myosin light polypeptide 6<br>OS=Homo sapiens<br>GN=MYL6 PE=1<br>SV=2 | 0 MYL6_HUMAN,sp P60661 MYL6_BOVIN,sp P60662 MYL6_PIG,sp Q5R844 MYL6_PONAB,sp Q60605 MYL6_MOUSE,sp Q64119 MYL6_RAT,transcript B7Z6Z4 B7Z6Z4_HUMAN,transcript D2H345 D2H345_AILME,transcript D3R | nkD<br>QGT<br>YEDY<br>VEGL | 54% | 34.2 | 54.1572  | Ref | -0.42 | 0.066 | -0.7  | -0.2  | 0.023 | -0.3  | -0.35 | 60700 | 38700 | 58800 | 38900 | 60400 | 61600 | 51400 | 49200 | 799.4 | 2395.2 | 3 | 0.0189 | 7.889 |

|                                                                       |                                                                                                                                                                                                                                   |            |     |      |          |     |       |       |       |       |       |       |       |       |       |       |        |        |       |       |        |       |        |   |        |       |
|-----------------------------------------------------------------------|-----------------------------------------------------------------------------------------------------------------------------------------------------------------------------------------------------------------------------------|------------|-----|------|----------|-----|-------|-------|-------|-------|-------|-------|-------|-------|-------|-------|--------|--------|-------|-------|--------|-------|--------|---|--------|-------|
| Myosin light polypeptide 6<br>OS=Homo sapiens<br>GN=MYL6 PE=1<br>SV=2 | 0 MYL6_HUMAN,sp P60661 MYL6_BOVIN,sp P60662 MYL6_PIG,sp Q5R844 MYL6_PONAB,sp Q60605 MYL6_MOUSE,sp Q64119 MYL6_RAT,trans B0FZM4 B0FZM4_SHEEP,trans B2GV99 B2GV99_RAT,trans B7Z6Z4 B7Z6Z4_HUMAN,trans D2H345 D2H345_AILME,trans D3k | sDE<br>MNV | 91% | 42.5 | 51.61904 | Ref | -0.63 | 0.052 | -0.46 | -0.19 | -0.04 | -0.3  | -0.28 | 1E+05 | 73400 | 1E+05 | 101000 | 133000 | 1E+05 | 1E+05 | 113000 | 715.9 | 1429.8 | 2 | 0.0174 | 12.19 |
| Myosin light polypeptide 6<br>OS=Homo sapiens<br>GN=MYL6 PE=1<br>SV=2 | 0 MYL6_HUMAN,sp P60661 MYL6_BOVIN,sp P60662 MYL6_PIG,sp Q5R844 MYL6_PONAB,sp Q60605 MYL6_MOUSE,sp Q64119 MYL6_RAT,trans B0FZM4 B0FZM4_SHEEP,trans B2GV99 B2GV99_RAT,trans B7Z6Z4 B7Z6Z4_HUMAN,trans D2H345 D2H345_AILME,trans D3k | sDE<br>mNV | 68% | 34   | 51.32208 | Ref | -0.55 | -0.01 | -0.38 | -0.2  | -0.04 | -0.34 | -0.18 | 39300 | 24400 | 38500 | 33500  | 41900  | 41000 | 34600 | 38400  | 482.9 | 1445.7 | 3 | 0.0214 | 14.82 |

|                                                                       |                                                                                                                                                                                                                                  |                                  |     |      |          |     |       |       |       |       |       |       |       |       |       |       |       |       |       |       |       |       |        |   |        |       |
|-----------------------------------------------------------------------|----------------------------------------------------------------------------------------------------------------------------------------------------------------------------------------------------------------------------------|----------------------------------|-----|------|----------|-----|-------|-------|-------|-------|-------|-------|-------|-------|-------|-------|-------|-------|-------|-------|-------|-------|--------|---|--------|-------|
| Myosin light polypeptide 6<br>OS=Homo sapiens<br>GN=MYL6 PE=1<br>SV=2 | 0 MYL6_HUMAN,sp P60661 MYL6_BOVIN,sp P60662 MYL6_PIG,sp Q5R844 MYL6_PONAB,sp Q60605 MYL6_MOUSE,sp Q64119 MYL6_RAT,trans B0FZM4 B0FZM4_SHEEP,trans B2GV99 B2GV99_RAT,trans B7Z6Z4 B7Z6Z4_HUMAN,trans D2H345 D2H345_AILME,trans D3 | sDE<br>MnV                       | 55% | 31.4 | 51.4129  | Ref | -0.48 | -0.04 | -0.34 | -0.13 | -0.05 | -0.46 | -0.16 | 19800 | 13300 | 19500 | 17800 | 22700 | 20900 | 16500 | 20100 | 716.4 | 1430.8 | 2 | 0.0034 | 2.365 |
| Myosin light polypeptide 6<br>OS=Homo sapiens<br>GN=MYL6 PE=1<br>SV=2 | 0 MYL6_HUMAN,sp P60661 MYL6_BOVIN,sp P60662 MYL6_PIG,sp Q5R844 MYL6_PONAB,sp Q60605 MYL6_MOUSE,sp Q64119 MYL6_RAT,trans B0FZM4 B0FZM4_SHEEP,trans B2GV99 B2GV99_RAT,trans B7Z6Z4 B7Z6Z4_HUMAN,trans D2H345 D2H345_AILME,trans D3 | vFDK<br>EGn<br>GTV<br>MGA<br>EIR | 52% | 34.3 | 54.62952 | Ref | -0.63 | 0.13  | -0.54 | -0.19 | 0.031 | -0.32 | -0.33 | 25300 | 14300 | 26500 | 18600 | 26200 | 26600 | 21800 | 21500 | 778.1 | 2331.2 | 3 | 0.0237 | 10.15 |



|                                                                       |                                                                                                                                                                                                                                                           |                                  |     |      |          |     |       |       |       |        |       |       |       |     |     |     |     |     |     |     |     |       |        |   |        |      |
|-----------------------------------------------------------------------|-----------------------------------------------------------------------------------------------------------------------------------------------------------------------------------------------------------------------------------------------------------|----------------------------------|-----|------|----------|-----|-------|-------|-------|--------|-------|-------|-------|-----|-----|-----|-----|-----|-----|-----|-----|-------|--------|---|--------|------|
| Myosin light polypeptide 6<br>OS=Homo sapiens<br>GN=MYL6 PE=1<br>SV=2 | 0 MYL6_HUMAN,sp P60661 MYL6_BOVIN,sp P60662 MYL6_PIG,sp Q5R844 MYL6_PONAB,sp Q60605 MYL6_MOUSE,sp Q64119 MYL6_RAT,transcript B0FZM4 B0FZM4_SHEEP,transcript B2GV99 B2GV99_RAT,transcript B7Z6Z4 B7Z6Z4_HUMAN,transcript D2H345 D2H345_AILME,transcript D3 | vLDF<br>EHFL<br>PML<br>QTV<br>AK | 88% | 44.5 | 53.77323 | Ref | -0.46 | -0.05 | -0.59 | -0.097 | -0.05 | -0.29 | -0.31 | 892 | 548 | 794 | 609 | 948 | 856 | 758 | 739 | 832.8 | 2495.4 | 3 | 0.0125 | 5.01 |
| Myosin light polypeptide 6<br>OS=Homo sapiens<br>GN=MYL6 PE=1<br>SV=2 | 0 MYL6_HUMAN,sp P60661 MYL6_BOVIN,sp P60662 MYL6_PIG,sp Q5R844 MYL6_PONAB,sp Q60605 MYL6_MOUSE,sp Q64119 MYL6_RAT,transcript B0FZM4 B0FZM4_SHEEP,transcript B2GV99 B2GV99_RAT,transcript B7Z6Z4 B7Z6Z4_HUMAN,transcript D2H345 D2H345_AILME,transcript D3 | vLDF<br>EHFL<br>PmL<br>QTV<br>AK | 91% | 47.6 | 54.28543 | Ref | -0.45 | -0.06 | -0.51 | -0.26  | 0.047 | -0.36 | -0.35 | 660 | 388 | 550 | 453 | 595 | 642 | 507 | 505 | 838.1 | 2511.4 | 3 | 0.019  | 7.55 |

|                                                                                 |                                                                                                                                                                                                                   |                                          |     |      |          |     |       |       |       |        |       |       |       |       |       |       |       |       |       |       |       |       |        |   |        |       |
|---------------------------------------------------------------------------------|-------------------------------------------------------------------------------------------------------------------------------------------------------------------------------------------------------------------|------------------------------------------|-----|------|----------|-----|-------|-------|-------|--------|-------|-------|-------|-------|-------|-------|-------|-------|-------|-------|-------|-------|--------|---|--------|-------|
| Myosin light polypeptide 6<br>OS=Homo sapiens<br>GN=MYL6 PE=1<br>SV=2           | 0 MYL6_HUMAN,sp P60661 MYL6_BOVIN,sp P60662 MYL6_PIG,sp Q5R844 MYL6_PONAB,sp Q60605 MYL6_MOUSE,sp Q64119 MYL6_RAT,tr B0FZM4 B0FZM4_SHEEP,tr B2GV99 B2GV99_RAT,tr B7Z6Z4 B7Z6Z4_HUMAN,tr D2H345 D2H345_AILME,tr D3 | vLDF<br>EHFL<br>PmL<br>QTV<br>AK         | 95% | 53.8 | 54.32613 | Ref | -0.66 | 0.006 | -0.63 | 0.008  | -0.18 | -0.31 | -0.25 | 514   | 260   | 447   | 324   | 554   | 426   | 406   | 418   | 838.1 | 2511.4 | 3 | 0.0206 | 8.207 |
| Uncharacterized protein (Fragment)<br>OS=Bos taurus<br>GN=Bt.59726 PE=4<br>SV=1 | tr F1MLW0 F1MLW0_BOVIN,tr Q8HY3 Q8HY3_BOVIN                                                                                                                                                                       | aAkP<br>TkPA<br>ASDL<br>PVP<br>AEG<br>VR | 74% | 33.3 | 51.0152  | Ref | -0.52 | 0.13  | -0.59 | -0.11  | -0.47 | -0.18 | -0.38 | 15700 | 9780  | 16700 | 11300 | 17400 | 11900 | 15100 | 13100 | 722.7 | 2886.7 | 4 | 0.0309 | 10.69 |
| Uncharacterized protein (Fragment)<br>OS=Bos taurus<br>GN=Bt.59726 PE=4<br>SV=1 | tr F1MLW0 F1MLW0_BOVIN,tr Q8HY3 Q8HY3_BOVIN                                                                                                                                                                       | aAkP<br>TkPA<br>ASDL<br>PVP<br>AEG<br>VR | 95% | 52.5 | 50.68182 | Ref | -1.1  | 0.48  | -0.9  | -0.094 | -0.7  | -0.08 | -0.38 | 77400 | 29400 | 95100 | 41100 | 79200 | 45300 | 73200 | 58700 | 722.7 | 2886.7 | 4 | 0.0258 | 8.917 |

|                                                                                 |                                                                   |                                          |     |      |          |     |       |       |       |       |       |       |       |       |       |       |       |       |       |       |       |       |        |   |        |       |
|---------------------------------------------------------------------------------|-------------------------------------------------------------------|------------------------------------------|-----|------|----------|-----|-------|-------|-------|-------|-------|-------|-------|-------|-------|-------|-------|-------|-------|-------|-------|-------|--------|---|--------|-------|
| Uncharacterized protein (Fragment)<br>OS=Bos taurus<br>GN=Bt.59726 PE=4<br>SV=1 | tr F1ML<br>W0 F1ML<br>W0_BOVI<br>N,tr Q8H<br>YY3 Q8HY<br>Y3_BOVIN | aAkP<br>TkPA<br>ASDL<br>PVP<br>AEG<br>VR | 95% | 56.6 | 49.90166 | Ref | -0.63 | 0.26  | -0.64 | -0.1  | -0.37 | -0.2  | -0.42 | 12700 | 7770  | 15600 | 9410  | 15000 | 10900 | 12800 | 10900 | 722.7 | 2886.7 | 4 | 0.0116 | 4.014 |
| Uncharacterized protein (Fragment)<br>OS=Bos taurus<br>GN=Bt.59726 PE=4<br>SV=1 | tr F1ML<br>W0 F1ML<br>W0_BOVI<br>N,tr Q8H<br>YY3 Q8HY<br>Y3_BOVIN | aEFL<br>Nk                               | 59% | 31.5 | 50.9332  | Ref | -0.79 | 0.41  | -0.78 | -0.17 | -0.57 | -0.11 | -0.51 | 33500 | 16100 | 40100 | 19700 | 33100 | 22000 | 31500 | 23600 | 665.4 | 1328.8 | 2 | 0.0246 | 18.52 |
| Uncharacterized protein (Fragment)<br>OS=Bos taurus<br>GN=Bt.59726 PE=4<br>SV=1 | tr F1ML<br>W0 F1ML<br>W0_BOVI<br>N,tr Q8H<br>YY3 Q8HY<br>Y3_BOVIN | eAE<br>GTS<br>QVE<br>AGk                 | 74% | 37.2 | 53.05605 | Ref | -0.24 | -0.19 | -0.59 | -0.05 | -0.31 | -0.45 | -0.36 | 10000 | 6990  | 7840  | 6680  | 10700 | 7790  | 7400  | 7800  | 605.3 | 1812.9 | 3 | 0.0228 | 12.57 |
| Uncharacterized protein (Fragment)<br>OS=Bos taurus<br>GN=Bt.59726 PE=4<br>SV=1 | tr F1ML<br>W0 F1ML<br>W0_BOVI<br>N,tr Q8H<br>YY3 Q8HY<br>Y3_BOVIN | eAE<br>GTS<br>QVE<br>AGk                 | 94% | 51.2 | 53.05964 | Ref | -0.88 | 0.45  | -0.72 | -0.28 | -0.46 | -0.16 | -0.49 | 37500 | 16700 | 45500 | 22700 | 33900 | 26200 | 33700 | 26500 | 605.3 | 1812.9 | 3 | 0.0226 | 12.47 |
| Uncharacterized protein (Fragment)<br>OS=Bos taurus<br>GN=Bt.59726 PE=4<br>SV=1 | tr F1ML<br>W0 F1ML<br>W0_BOVI<br>N,tr Q8H<br>YY3 Q8HY<br>Y3_BOVIN | eAE<br>GTS<br>QVE<br>AGk                 | 95% | 62.4 | 53.08445 | Ref | -0.83 | 0.56  | -0.95 | -0.17 | -0.48 | -0.18 | -0.7  | 28800 | 13100 | 37200 | 14700 | 27900 | 19600 | 25300 | 17400 | 907.5 | 1813   | 2 | 0.0165 | 9.074 |

|                                                                                 |                                                                   |                      |     |      |          |     |       |      |       |       |       |       |       |       |       |       |       |       |       |       |       |       |        |   |        |       |
|---------------------------------------------------------------------------------|-------------------------------------------------------------------|----------------------|-----|------|----------|-----|-------|------|-------|-------|-------|-------|-------|-------|-------|-------|-------|-------|-------|-------|-------|-------|--------|---|--------|-------|
| Uncharacterized protein (Fragment)<br>OS=Bos taurus<br>GN=Bt.59726 PE=4<br>SV=1 | tr F1ML<br>W0 F1ML<br>W0_BOVI<br>N,tr Q8H<br>YY3 Q8HY<br>Y3_BOVIN | gETE<br>SEEF<br>Ek   | 86% | 40.8 | 51.7376  | Ref | -0.84 | 0.5  | -1    | -0.12 | -0.8  | -0.26 | -0.33 | 89900 | 38200 | 1E+05 | 41100 | 84100 | 46000 | 69600 | 66100 | 598.3 | 1791.9 | 3 | 0.0149 | 8.301 |
| Uncharacterized protein (Fragment)<br>OS=Bos taurus<br>GN=Bt.59726 PE=4<br>SV=1 | tr F1ML<br>W0 F1ML<br>W0_BOVI<br>N,tr Q8H<br>YY3 Q8HY<br>Y3_BOVIN | gETE<br>SEEF<br>Ek   | 91% | 42.3 | 51.83403 | Ref | -1.1  | 0.58 | -0.9  | -0.13 | -0.62 | -0.07 | -0.66 | 21600 | 8330  | 28200 | 11300 | 21300 | 13300 | 20300 | 13400 | 897   | 1791.9 | 2 | 0.0125 | 6.999 |
| Uncharacterized protein (Fragment)<br>OS=Bos taurus<br>GN=Bt.59726 PE=4<br>SV=1 | tr F1ML<br>W0 F1ML<br>W0_BOVI<br>N,tr Q8H<br>YY3 Q8HY<br>Y3_BOVIN | IEQY<br>TSAI<br>EGTk | 95% | 59.3 | 53.73842 | Ref | -1.1  | 0.31 | -0.96 | -0.11 | -0.57 | 0.19  | -0.41 | 31500 | 12900 | 36600 | 17000 | 33900 | 21400 | 38000 | 24700 | 650   | 1947.1 | 3 | 0.0194 | 9.961 |
| Uncharacterized protein (Fragment)<br>OS=Bos taurus<br>GN=Bt.59726 PE=4<br>SV=1 | tr F1ML<br>W0 F1ML<br>W0_BOVI<br>N,tr Q8H<br>YY3 Q8HY<br>Y3_BOVIN | IEQY<br>TSAI<br>EGTk | 91% | 44.7 | 53.7644  | Ref | -0.77 | 0.17 | -0.72 | -0.23 | -0.55 | 0.08  | -0.23 | 10400 | 5500  | 11400 | 6900  | 10700 | 7500  | 12100 | 9680  | 974.5 | 1947.1 | 2 | 0.0174 | 8.952 |
| Uncharacterized protein (Fragment)<br>OS=Bos taurus<br>GN=Bt.59726 PE=4<br>SV=1 | tr F1ML<br>W0 F1ML<br>W0_BOVI<br>N,tr Q8H<br>YY3 Q8HY<br>Y3_BOVIN | IEQY<br>TSAI<br>EGTk | 95% | 57.1 | 53.6549  | Ref | -0.69 | 0.27 | -0.84 | -0.28 | -0.6  | 0.053 | -0.16 | 5270  | 3060  | 6480  | 3350  | 5440  | 3830  | 6270  | 5390  | 974.5 | 1947.1 | 2 | 0.0071 | 3.623 |

|                                                                                 |                                                                   |                           |     |      |          |     |       |      |       |       |       |       |       |       |      |       |      |       |       |       |       |       |        |   |        |       |
|---------------------------------------------------------------------------------|-------------------------------------------------------------------|---------------------------|-----|------|----------|-----|-------|------|-------|-------|-------|-------|-------|-------|------|-------|------|-------|-------|-------|-------|-------|--------|---|--------|-------|
| Uncharacterized protein (Fragment)<br>OS=Bos taurus<br>GN=Bt.59726 PE=4<br>SV=1 | tr F1ML<br>W0 F1ML<br>W0_BOVI<br>N,tr Q8H<br>YY3 Q8HY<br>Y3_BOVIN | IEQY<br>TSAI<br>EGTk      | 93% | 49.5 | 53.72918 | Ref | -0.53 | 0.34 | -0.7  | -0.24 | -0.63 | -0.12 | -0.39 | 8990  | 5590 | 11100 | 6040 | 9150  | 6110  | 9080  | 7480  | 650   | 1947.1 | 3 | 0.017  | 8.729 |
| Uncharacterized protein (Fragment)<br>OS=Bos taurus<br>GN=Bt.59726 PE=4<br>SV=1 | tr F1ML<br>W0 F1ML<br>W0_BOVI<br>N,tr Q8H<br>YY3 Q8HY<br>Y3_BOVIN | mQN<br>DTT<br>DnET<br>AEk | 85% | 39.7 | 51.04347 | Ref | -0.83 | 0.4  | -0.88 | -0.18 | -0.45 | -0.11 | -0.66 | 18700 | 8040 | 20500 | 9490 | 17000 | 12300 | 16200 | 11000 | 702.7 | 2105   | 3 | 0.023  | 10.92 |
| Uncharacterized protein (Fragment)<br>OS=Bos taurus<br>GN=Bt.59726 PE=4<br>SV=1 | tr F1ML<br>W0 F1ML<br>W0_BOVI<br>N,tr Q8H<br>YY3 Q8HY<br>Y3_BOVIN | nDD<br>DEEE<br>AAR        | 95% | 41.3 | 45.50827 | Ref | -0.97 | 0.65 | -0.78 | -0.22 | -0.54 | -0.12 | -0.62 | 10200 | 4730 | 15700 | 6550 | 10700 | 7450  | 10400 | 7290  | 734.3 | 1466.6 | 2 | 0.0079 | 5.387 |
| Uncharacterized protein (Fragment)<br>OS=Bos taurus<br>GN=Bt.59726 PE=4<br>SV=1 | tr F1ML<br>W0 F1ML<br>W0_BOVI<br>N,tr Q8H<br>YY3 Q8HY<br>Y3_BOVIN | nDD<br>DEEE<br>AAR        | 95% | 57.1 | 45.5234  | Ref | -0.85 | 0.45 | -0.36 | -0.29 | -0.44 | -0.27 | -0.37 | 3440  | 1900 | 5070  | 3240 | 3770  | 2970  | 3470  | 3220  | 489.9 | 1466.6 | 3 | 0.0077 | 5.234 |
| Uncharacterized protein (Fragment)<br>OS=Bos taurus<br>GN=Bt.59726 PE=4<br>SV=1 | tr F1ML<br>W0 F1ML<br>W0_BOVI<br>N,tr Q8H<br>YY3 Q8HY<br>Y3_BOVIN | nDW<br>MEA<br>EEk         | 95% | 51.7 | 51.47942 | Ref | -0.87 | 0.36 | -0.87 | -0.15 | -0.55 | -0.05 | -0.46 | 12600 | 5560 | 14200 | 6810 | 12300 | 8180  | 12100 | 9030  | 880.4 | 1758.8 | 2 | 0.0242 | 13.72 |

|                                                                                 |                                                                   |                                                               |     |      |          |     |                          |                          |                          |                        |                         |                         |                         |                         |                          |                          |                         |                        |                          |                        |                         |       |        |   |        |       |
|---------------------------------------------------------------------------------|-------------------------------------------------------------------|---------------------------------------------------------------|-----|------|----------|-----|--------------------------|--------------------------|--------------------------|------------------------|-------------------------|-------------------------|-------------------------|-------------------------|--------------------------|--------------------------|-------------------------|------------------------|--------------------------|------------------------|-------------------------|-------|--------|---|--------|-------|
| Uncharacterized protein (Fragment)<br>OS=Bos taurus<br>GN=Bt.59726 PE=4<br>SV=1 | tr F1ML<br>W0 F1ML<br>W0_BOVI<br>N,tr Q8H<br>YY3 Q8HY<br>Y3_BOVIN | qkEF<br>DPTI<br>TDAS<br>LSLS<br>SR                            | 79% | 41.1 | 55.05836 | Ref | -0.49                    | 0.13                     | -0.6                     | -0.19                  | -0.26                   | -0.21                   | -0.28                   | 6760                    | 4860                     | 8090                     | 5470                    | 8020                   | 6650                     | 7210                   | 6820                    | 868.5 | 2602.4 | 3 | 0.0247 | 9.485 |
| Uncharacterized protein (Fragment)<br>OS=Bos taurus<br>GN=Bt.59726 PE=4<br>SV=1 | tr F1ML<br>W0 F1ML<br>W0_BOVI<br>N,tr Q8H<br>YY3 Q8HY<br>Y3_BOVIN | qkEF<br>DPTI<br>TDAS<br>LSLS<br>SR                            | 59% | 36   | 55.0268  | Ref | -0.76                    | 0.25                     | -0.71                    | -0.26                  | -0.45                   | -0.01                   | -0.44                   | 5280                    | 2610                     | 5690                     | 3290                    | 4960                   | 3780                     | 5360                   | 3940                    | 868.5 | 2602.4 | 3 | 0.0188 | 7.238 |
| Uncharacterized protein (Fragment)<br>OS=Bos taurus<br>GN=Bt.59726 PE=4<br>SV=1 | tr F1ML<br>W0 F1ML<br>W0_BOVI<br>N,tr Q8H<br>YY3 Q8HY<br>Y3_BOVIN | qkEF<br>DPTI<br>TDAS<br>LSLS<br>SR                            | 95% | 54.1 | 55.0276  | Ref | -0.73                    | 0.42                     | -0.65                    | -0.2                   | -0.41                   | -0.02                   | -0.52                   | 4080                    | 2550                     | 6130                     | 3270                    | 4940                   | 3710                     | 5100                   | 3580                    | 868.5 | 2602.4 | 3 | 0.0196 | 7.526 |
| Uncharacterized protein (Fragment)<br>OS=Bos taurus<br>GN=Bt.59726 PE=4<br>SV=1 | tr F1ML<br>W0 F1ML<br>W0_BOVI<br>N,tr Q8H<br>YY3 Q8HY<br>Y3_BOVIN | qkQE<br>EEAL<br>GQV<br>TDQ<br>VEV<br>NTQ<br>NSV<br>PDEE<br>Vk | 72% | 34.4 | 56.21809 | Ref | -0.49                    | -0.03                    | -0.54                    | -0.34                  | -0.23                   | -0.11                   | -0.35                   | 1790                    | 1110                     | 1660                     | 1310                    | 1660                   | 1570                     | 1770                   | 1500                    | 837.4 | 4182.1 | 5 | 0.0549 | 13.13 |
| Uncharacterized protein (Fragment)<br>OS=Bos taurus<br>GN=Bt.59726 PE=4<br>SV=1 | tr F1ML<br>W0 F1ML<br>W0_BOVI<br>N,tr Q8H<br>YY3 Q8HY<br>Y3_BOVIN | qkQE<br>EEAL<br>GQV<br>TDQ<br>VEV<br>NTQ<br>NSV<br>PDEE<br>Vk | 58% | 35.2 | 56.21319 | Ref | No Values (-0.025164016) | No Value s (-0.14285748) | No Value s (-0.30945227) | No Values (-0.4499314) | No Values (-0.25405902) | No Value s (-0.3168257) | No Values (-0.30595154) | No Values (-0.22755413) | No Values (-0.025164016) | No Value s (-0.14285748) | No Values (-0.30945227) | No Values (-0.4499314) | No Value s (-0.25405902) | No Values (-0.3168257) | No Values (-0.30595154) | 1047  | 4182.1 | 4 | 0.0367 | 8.781 |

|                                                                                 |                                                                   |                                                               |     |      |          |     |                          |                          |                          |                        |                              |                          |                         |                          |                          |                          |                          |                          |                          |                         |        |        |        |        |        |       |
|---------------------------------------------------------------------------------|-------------------------------------------------------------------|---------------------------------------------------------------|-----|------|----------|-----|--------------------------|--------------------------|--------------------------|------------------------|------------------------------|--------------------------|-------------------------|--------------------------|--------------------------|--------------------------|--------------------------|--------------------------|--------------------------|-------------------------|--------|--------|--------|--------|--------|-------|
| Uncharacterized protein (Fragment)<br>OS=Bos taurus<br>GN=Bt.59726 PE=4<br>SV=1 | tr F1ML<br>W0 F1ML<br>W0_BOVI<br>N,tr Q8H<br>YY3 Q8HY<br>Y3_BOVIN | qkQE<br>EEAL<br>GQV<br>TDQ<br>VEV<br>NTQ<br>NSV<br>PDEE<br>Vk | 78% | 39.7 | 56.2077  | Ref | No Values (-0.025164278) | No Value s (-0.14285767) | No Value s (-0.30945247) | No Values (-0.4499315) | No Values (-0.25405923)      | No Value s (-0.31682578) | No Values (-0.30595186) | No Values (-0.22755413)  | No Values (-0.025164278) | No Value s (-0.14285767) | No Values (-0.309452475) | No Value s (-0.25405923) | No Values (-0.316825786) | No Values (-0.30595186) | 1047   | 4182.1 | 4      | 0.0265 | 6.333  |       |
| Uncharacterized protein (Fragment)<br>OS=Bos taurus<br>GN=Bt.59726 PE=4<br>SV=1 | tr F1ML<br>W0 F1ML<br>W0_BOVI<br>N,tr Q8H<br>YY3 Q8HY<br>Y3_BOVIN | qkQE<br>EEAL<br>GQV<br>TDQ<br>VEV<br>NTQ<br>nSVP<br>DEEV<br>k | 82% | 41.5 | 56.23902 | Ref | No Values (-0.025164103) | No Value s (-0.14285748) | No Value s (-0.30945247) | No Values (-0.4499315) | No Value s (-0.316825785902) | No Values (-0.30595186)  | No Values (-0.22755413) | No Values (-0.025164103) | No Value s (-0.14285748) | No Values (-0.309452475) | No Value s (-0.25405902) | No Values (-0.316825786) | No Values (-0.30595186)  | 1047                    | 4183.1 | 4      | 0.0294 | 7.033  |        |       |
| Uncharacterized protein (Fragment)<br>OS=Bos taurus<br>GN=Bt.59726 PE=4<br>SV=1 | tr F1ML<br>W0 F1ML<br>W0_BOVI<br>N,tr Q8H<br>YY3 Q8HY<br>Y3_BOVIN | qQE<br>AALE<br>LEEL<br>k                                      | 77% | 38.5 | 53.32109 | Ref | -0.27                    | -0.05                    | -0.3                     | -0.18                  | -0.6                         | 0.18                     | -0.43                   | 55900                    | 56900                    | 71900                    | 68200                    | 81700                    | 53100                    | 95400                   | 62100  | 670.4  | 2008.1 | 3      | 0.0081 | 4.031 |
| Uncharacterized protein (Fragment)<br>OS=Bos taurus<br>GN=Bt.59726 PE=4<br>SV=1 | tr F1ML<br>W0 F1ML<br>W0_BOVI<br>N,tr Q8H<br>YY3 Q8HY<br>Y3_BOVIN | qQE<br>AALE<br>LEEL<br>k                                      | 61% | 34.4 | 53.13992 | Ref | -0.2                     | -0.09                    | -0.34                    | -0.29                  | -0.36                        | -0.07                    | -0.34                   | 6900                     | 6570                     | 7720                     | 7300                     | 8300                     | 6930                     | 8800                    | 7250   | 670.4  | 2008.1 | 3      | 0.0046 | 2.299 |
| Uncharacterized protein (Fragment)<br>OS=Bos taurus<br>GN=Bt.59726 PE=4<br>SV=1 | tr F1ML<br>W0 F1ML<br>W0_BOVI<br>N,tr Q8H<br>YY3 Q8HY<br>Y3_BOVIN | qQE<br>AALE<br>LEEL<br>kk                                     | 52% | 33.2 | 53.59551 | Ref | -0.58                    | 0.24                     | -0.65                    | -0.24                  | -0.4                         | -0.13                    | -0.28                   | 17000                    | 11000                    | 21100                    | 12700                    | 18600                    | 14600                    | 18400                   | 16400  | 707.4  | 2119.2 | 3      | 0.0178 | 8.4   |

|                                                                                 |                                                                                                   |                                         |     |      |          |     |       |      |       |        |       |       |       |       |       |       |       |        |       |       |       |       |        |   |        |       |
|---------------------------------------------------------------------------------|---------------------------------------------------------------------------------------------------|-----------------------------------------|-----|------|----------|-----|-------|------|-------|--------|-------|-------|-------|-------|-------|-------|-------|--------|-------|-------|-------|-------|--------|---|--------|-------|
| Uncharacterized protein (Fragment)<br>OS=Bos taurus<br>GN=Bt.59726 PE=4<br>SV=1 | tr F1ML<br>W0 F1ML<br>W0_BOVI<br>N,tr Q8H<br>YY3 Q8HY<br>Y3_BOVIN                                 | sQn<br>GEF<br>MTH<br>k                  | 84% | 40.3 | 52.43576 | Ref | -0.7  | 0.33 | -0.92 | -0.15  | -0.58 | -0.14 | -0.32 | 39200 | 20000 | 44400 | 20900 | 39400  | 25500 | 36200 | 31600 | 596.6 | 1786.9 | 3 | 0.0176 | 9.827 |
| Uncharacterized protein (Fragment)<br>OS=Bos taurus<br>GN=Bt.59726 PE=4<br>SV=1 | tr F1ML<br>W0 F1ML<br>W0_BOVI<br>N,tr Q8H<br>YY3 Q8HY<br>Y3_BOVIN                                 | tTTT<br>NTQ<br>AEG<br>DDE<br>AALL<br>ER | 95% | 48.3 | 52.40147 | Ref | -1.1  | 0.5  | -1    | -0.073 | -0.57 | -0    | -0.47 | 9140  | 3700  | 12200 | 4760  | 10100  | 6250  | 9640  | 6930  | 1171  | 2339.1 | 2 | 0.021  | 8.962 |
| Uncharacterized protein (Fragment)<br>OS=Bos taurus<br>GN=Bt.59726 PE=4<br>SV=1 | tr F1ML<br>W0 F1ML<br>W0_BOVI<br>N,tr Q8H<br>YY3 Q8HY<br>Y3_BOVIN                                 | vLEE<br>EEQ<br>ER                       | 81% | 36.4 | 50.61203 | Ref | -0.91 | 0.4  | -0.73 | -0.23  | -0.42 | -0    | -0.49 | 54400 | 25900 | 69800 | 35800 | 55700  | 42600 | 59600 | 42000 | 668.4 | 1334.7 | 2 | 0.0115 | 8.572 |
| Uncharacterized protein (Fragment)<br>OS=Bos taurus<br>GN=Bt.59726 PE=4<br>SV=1 | tr F1ML<br>W0 F1ML<br>W0_BOVI<br>N,tr Q8H<br>YY3 Q8HY<br>Y3_BOVIN                                 | vLEE<br>EEQ<br>R                        | 68% | 32.9 | 50.75365 | Ref | -0.92 | 0.43 | -0.74 | -0.19  | -0.52 | -0.1  | -0.51 | 1E+05 | 60900 | 2E+05 | 83900 | 136000 | 94300 | 1E+05 | 98200 | 668.4 | 1334.7 | 2 | 0.0104 | 7.749 |
| Histone H1.4<br>OS=Homo sapiens<br>GN=HIST1H1E PE=1<br>SV=2                     | sp P1041<br>2 H14_H<br>UMAN,tr <br>A3R0T8 A<br>3R0T8_H<br>UMAN,tr <br>Q4VB24 <br>Q4VB24_<br>HUMAN | aLAA<br>AGY<br>DVEk                     | 95% | 72.8 | 52.92502 | Ref | -1.2  | 0.2  | -1.5  | -0.25  | -0.47 | -0.36 | -0.45 | 29500 | 10800 | 30600 | 10500 | 27800  | 20800 | 23400 | 21800 | 858.5 | 1715   | 2 | 0.0208 | 12.15 |



|                                                             |                                                                     |                      |     |      |          |     |      |       |       |       |       |       |       |       |       |       |       |        |       |       |        |       |        |   |        |       |
|-------------------------------------------------------------|---------------------------------------------------------------------|----------------------|-----|------|----------|-----|------|-------|-------|-------|-------|-------|-------|-------|-------|-------|-------|--------|-------|-------|--------|-------|--------|---|--------|-------|
| Histone H1.4<br>OS=Homo sapiens<br>GN=HIST1H1E PE=1<br>SV=2 | sp P10412 H14_HUMAN, tr A3ROT8 A3ROT8_HUMAN, tr Q4VB24 Q4VB24_HUMAN | aLAAAGYDVEK          | 67% | 35.5 | 52.93102 | Ref | -1.4 | 0.2   | -1.9  | -0.45 | -0.36 | -0.25 | -0.28 | 1E+05 | 38400 | 1E+05 | 33200 | 101000 | 93000 | 1E+05 | 102000 | 572.7 | 1715   | 3 | 0.0189 | 10.99 |
| Histone H1.4<br>OS=Homo sapiens<br>GN=HIST1H1E PE=1<br>SV=2 | sp P10412 H14_HUMAN, tr A3ROT8 A3ROT8_HUMAN, tr Q4VB24 Q4VB24_HUMAN | aSGP<br>PVSE<br>LITk | 94% | 49.5 | 51.77    | Ref | -1.3 | 0.23  | -1.5  | -0.21 | -0.51 | -0.35 | -0.32 | 1E+05 | 36700 | 1E+05 | 39200 | 106000 | 75300 | 87900 | 89600  | 603   | 1806   | 3 | 0.0214 | 11.84 |
| Histone H1.4<br>OS=Homo sapiens<br>GN=HIST1H1E PE=1<br>SV=2 | sp P10412 H14_HUMAN, tr A3ROT8 A3ROT8_HUMAN, tr Q4VB24 Q4VB24_HUMAN | aSGP<br>PVSE<br>LITk | 95% | 58.8 | 51.47642 | Ref | -1.6 | 0.41  | -2.4  | -0.2  | -0.5  | -0.4  | -0.54 | 31600 | 7970  | 34400 | 5660  | 27900  | 19700 | 22100 | 19900  | 904   | 1806.1 | 2 | 0.0151 | 8.363 |
| Histone H1.4<br>OS=Homo sapiens<br>GN=HIST1H1E PE=1<br>SV=2 | sp P10412 H14_HUMAN, tr A3ROT8 A3ROT8_HUMAN, tr Q4VB24 Q4VB24_HUMAN | aSGP<br>PVSE<br>LITk | 93% | 43.7 | 51.47642 | Ref | -1.6 | 0.36  | -2.2  | -0.16 | -0.49 | -0.31 | -0.43 | 16700 | 4630  | 19400 | 3730  | 16700  | 11600 | 13800 | 12500  | 904   | 1806.1 | 2 | 0.0151 | 8.363 |
| Histone H1.4<br>OS=Homo sapiens<br>GN=HIST1H1E PE=1<br>SV=2 | sp P10412 H14_HUMAN, tr A3ROT8 A3ROT8_HUMAN, tr Q4VB24 Q4VB24_HUMAN | aSGP<br>PVSE<br>LITk | 93% | 47.6 | 51.25943 | Ref | -1   | -0.06 | -0.72 | -0.4  | -0.62 | -0.23 | -0.41 | 10700 | 4680  | 9930  | 7090  | 9710   | 7310  | 9940  | 8730   | 603   | 1806.1 | 3 | 0.0089 | 4.952 |

|                                                             |                                                                     |                      |     |      |          |     |       |       |       |       |       |       |       |       |       |       |       |       |       |       |       |       |        |   |        |       |
|-------------------------------------------------------------|---------------------------------------------------------------------|----------------------|-----|------|----------|-----|-------|-------|-------|-------|-------|-------|-------|-------|-------|-------|-------|-------|-------|-------|-------|-------|--------|---|--------|-------|
| Histone H1.4<br>OS=Homo sapiens<br>GN=HIST1H1E PE=1<br>SV=2 | sp P10412 H14_HUMAN, tr A3ROT8 A3ROT8_HUMAN, tr Q4VB24 Q4VB24_HUMAN | aSGP<br>PVSE<br>LITk | 92% | 45.6 | 51.75314 | Ref | -0.69 | -0.03 | -0.93 | -0.26 | -0.64 | -0.31 | -0.44 | 17700 | 10600 | 18300 | 10900 | 19300 | 12900 | 16900 | 15400 | 603   | 1806.1 | 3 | 0.021  | 11.64 |
| Histone H1.4<br>OS=Homo sapiens<br>GN=HIST1H1E PE=1<br>SV=2 | sp P10412 H14_HUMAN, tr A3ROT8 A3ROT8_HUMAN, tr Q4VB24 Q4VB24_HUMAN | gTG<br>ASGS<br>Fk    | 90% | 42.3 | 52.11967 | Ref | -1.4  | 0.47  | -2    | -0.29 | -0.64 | -0.29 | -0.47 | 44300 | 14500 | 56700 | 11400 | 41300 | 28400 | 37800 | 33000 | 710.4 | 1418.8 | 2 | 0.024  | 16.91 |
| Histone H1.4<br>OS=Homo sapiens<br>GN=HIST1H1E PE=1<br>SV=2 | sp P10412 H14_HUMAN, tr A3ROT8 A3ROT8_HUMAN, tr Q4VB24 Q4VB24_HUMAN | gTG<br>ASGS<br>Fk    | 95% | 50.6 | 52.10888 | Ref | -1.4  | 0.27  | -1.7  | -0.13 | -0.61 | -0.26 | -0.32 | 50200 | 17200 | 60800 | 17800 | 56700 | 35500 | 47400 | 45000 | 473.9 | 1418.8 | 3 | 0.0225 | 15.82 |
| Histone H1.4<br>OS=Homo sapiens<br>GN=HIST1H1E PE=1<br>SV=2 | sp P10412 H14_HUMAN, tr A3ROT8 A3ROT8_HUMAN, tr Q4VB24 Q4VB24_HUMAN | gTG<br>ASGS<br>Fk    | 95% | 54.9 | 52.13353 | Ref | -1.6  | 0.5   | -2    | -0.23 | -0.59 | -0.32 | -0.53 | 20200 | 5820  | 26100 | 5230  | 19500 | 13300 | 16700 | 14300 | 710.4 | 1418.8 | 2 | 0.0245 | 17.27 |
| Histone H1.4<br>OS=Homo sapiens<br>GN=HIST1H1E PE=1<br>SV=2 | sp P10412 H14_HUMAN, tr A3ROT8 A3ROT8_HUMAN, tr Q4VB24 Q4VB24_HUMAN | gTLV<br>Qtk          | 86% | 38.7 | 51.03071 | Ref | -1.3  | 0.39  | -1.6  | -0.26 | -0.61 | -0.34 | -0.49 | 28500 | 9910  | 35300 | 10200 | 27800 | 19100 | 24000 | 21400 | 677.9 | 1353.8 | 2 | 0.023  | 17.01 |

|                                                             |                                                                     |                          |     |      |          |     |       |       |      |        |       |       |       |       |       |       |       |        |       |       |        |       |        |   |        |       |
|-------------------------------------------------------------|---------------------------------------------------------------------|--------------------------|-----|------|----------|-----|-------|-------|------|--------|-------|-------|-------|-------|-------|-------|-------|--------|-------|-------|--------|-------|--------|---|--------|-------|
| Histone H1.4<br>OS=Homo sapiens<br>GN=HIST1H1E PE=1<br>SV=2 | sp P10412 H14_HUMAN, tr A3ROT8 A3ROT8_HUMAN, tr Q4VB24 Q4VB24_HUMAN | gTLV<br>QTK              | 84% | 38.3 | 51.40637 | Ref | -0.99 | 0.19  | -1.4 | -0.28  | -0.6  | -0.38 | -0.42 | 32400 | 14000 | 34400 | 12700 | 30600  | 21400 | 26200 | 25200  | 677.9 | 1353.8 | 2 | 0.0205 | 15.12 |
| Histone H1.4<br>OS=Homo sapiens<br>GN=HIST1H1E PE=1<br>SV=2 | sp P10412 H14_HUMAN, tr A3ROT8 A3ROT8_HUMAN, tr Q4VB24 Q4VB24_HUMAN | kALA<br>AAG<br>YDVE<br>k | 87% | 39.7 | 52.1765  | Ref | -1.3  | 0.16  | -1.6 | -0.086 | -0.49 | -0.17 | -0.4  | 54200 | 21500 | 64200 | 21800 | 67100  | 44200 | 57700 | 48700  | 537.8 | 2147.2 | 4 | 0.0262 | 12.21 |
| Histone H1.4<br>OS=Homo sapiens<br>GN=HIST1H1E PE=1<br>SV=2 | sp P10412 H14_HUMAN, tr A3ROT8 A3ROT8_HUMAN, tr Q4VB24 Q4VB24_HUMAN | kASG<br>PPVS<br>ELITk    | 92% | 44.7 | 50.22738 | Ref | -1.2  | 0.096 | -1.3 | -0.052 | -0.59 | -0.24 | -0.37 | 16700 | 6950  | 18900 | 7990  | 21000  | 12700 | 16800 | 15300  | 747.1 | 2238.3 | 3 | 0.0399 | 17.82 |
| Histone H1.4<br>OS=Homo sapiens<br>GN=HIST1H1E PE=1<br>SV=2 | sp P10412 H14_HUMAN, tr A3ROT8 A3ROT8_HUMAN, tr Q4VB24 Q4VB24_HUMAN | kATG<br>AAT<br>Pk        | 71% | 32.9 | 49.5789  | Ref | -1.3  | 0.22  | -1.5 | -0.17  | -0.6  | -0.34 | -0.39 | 2E+05 | 79800 | 2E+05 | 87700 | 235000 | 2E+05 | 2E+05 | 182000 | 586.4 | 1756.1 | 3 | 0.0263 | 14.96 |
| Histone H1.4<br>OS=Homo sapiens<br>GN=HIST1H1E PE=1<br>SV=2 | sp P10412 H14_HUMAN, tr A3ROT8 A3ROT8_HUMAN, tr Q4VB24 Q4VB24_HUMAN | kPAA<br>AAG<br>Ak        | 87% | 36   | 48.5091  | Ref | -1    | 0.16  | -1.3 | -0.23  | -0.48 | -0.38 | -0.49 | 34000 | 15100 | 37200 | 15500 | 35100  | 25800 | 28900 | 26500  | 425   | 1696   | 4 | 0.0319 | 18.78 |

|                                                             |                                                                     |                                  |     |      |          |     |                            |                            |      |                            |                            |                            |                            |       |        |                            |        |        |                            |                            |                            |       |        |   |        |       |
|-------------------------------------------------------------|---------------------------------------------------------------------|----------------------------------|-----|------|----------|-----|----------------------------|----------------------------|------|----------------------------|----------------------------|----------------------------|----------------------------|-------|--------|----------------------------|--------|--------|----------------------------|----------------------------|----------------------------|-------|--------|---|--------|-------|
| Histone H1.4<br>OS=Homo sapiens<br>GN=HIST1H1E PE=1<br>SV=2 | sp P10412 H14_HUMAN, tr A3ROT8 A3ROT8_HUMAN, tr Q4VB24 Q4VB24_HUMAN | kPAA<br>AAG<br>Ak                | 81% | 32.5 | 45.92654 | Ref | -1.4                       | 0.2                        | -1.3 | -0.21                      | -0.55                      | -0.42                      | -0.34                      | 77200 | 24900  | 81800                      | 33200  | 76300  | 52700                      | 60300                      | 63000                      | 566.4 | 1696.1 | 3 | 0.0037 | 2.184 |
| Histone H1.4<br>OS=Homo sapiens<br>GN=HIST1H1E PE=1<br>SV=2 | sp P10412 H14_HUMAN, tr A3ROT8 A3ROT8_HUMAN, tr Q4VB24 Q4VB24_HUMAN | kPA<br>GAA<br>k                  | 51% | 24.4 | 46.72966 | Ref | -1.8                       | 0.4                        | -2   | -0.11                      | -0.81                      | -0.22                      | -0.45                      | 6E+05 | 150000 | 7E+05                      | 152000 | 632000 | 3E+05                      | 5E+05                      | 454000                     | 389.5 | 1554   | 4 | 0.0221 | 14.21 |
| Histone H1.4<br>OS=Homo sapiens<br>GN=HIST1H1E PE=1<br>SV=2 | sp P10412 H14_HUMAN, tr A3ROT8 A3ROT8_HUMAN, tr Q4VB24 Q4VB24_HUMAN | sETA<br>PAA<br>PAA<br>PAP<br>AEk | 63% | 34.4 | 53.15775 | Ref | Value Missing (-0.9699349) | Value Missing (-1.2542233) | 0.42 | Value Missing (-1.1988299) | Value Missing (-1.2615968) | Value Missing (-1.2507226) | Value Missing (-0.9699349) | 112   | 9)     | Value Missing (-1.2542119) | 233)   | 149    | Value Missing (-1.1988299) | Value Missing (-1.2615968) | Value Missing (-1.2507226) | 913   | 1823.9 | 2 | 0.0188 | 10.29 |
| Histone H1.4<br>OS=Homo sapiens<br>GN=HIST1H1E PE=1<br>SV=2 | sp P10412 H14_HUMAN, tr A3ROT8 A3ROT8_HUMAN, tr Q4VB24 Q4VB24_HUMAN | sETA<br>PAA<br>PAA<br>PAP<br>AEk | 65% | 36.2 | 54.12311 | Ref | -0.6                       | -0.09                      | -1.4 | -0.34                      | -0.56                      | -0.51                      | -0.17                      | 2380  | 1370   | 2110                       | 964    | 2190   | 1640                       | 1770                       | 2240                       | 696.4 | 2086.1 | 3 | 0.0256 | 12.25 |
| Histone H1.4<br>OS=Homo sapiens<br>GN=HIST1H1E PE=1<br>SV=2 | sp P10412 H14_HUMAN, tr A3ROT8 A3ROT8_HUMAN, tr Q4VB24 Q4VB24_HUMAN | sGVS<br>LAAL<br>k                | 95% | 47.9 | 49.78212 | Ref | -0.96                      | 0.23                       | -1.4 | -0.29                      | -0.64                      | -0.43                      | -0.49                      | 1E+05 | 57000  | 1E+05                      | 49500  | 122000 | 83500                      | 1E+05                      | 96000                      | 727.5 | 1452.9 | 2 | 0.0075 | 5.186 |

|                                                             |                                                                     |                    |     |      |          |     |       |       |       |        |       |       |       |       |       |       |       |        |       |       |        |       |        |   |        |       |
|-------------------------------------------------------------|---------------------------------------------------------------------|--------------------|-----|------|----------|-----|-------|-------|-------|--------|-------|-------|-------|-------|-------|-------|-------|--------|-------|-------|--------|-------|--------|---|--------|-------|
| Histone H1.4<br>OS=Homo sapiens<br>GN=HIST1H1E PE=1<br>SV=2 | sp P10412 H14_HUMAN, tr A3ROT8 A3ROT8_HUMAN, tr Q4VB24 Q4VB24_HUMAN | sGVS<br>LAAL<br>k  | 95% | 48.3 | 50.8147  | Ref | -0.93 | 0.32  | -1.6  | -0.33  | -0.56 | -0.32 | -0.62 | 37000 | 16900 | 43600 | 13400 | 34300  | 25700 | 31600 | 25500  | 727.5 | 1452.9 | 2 | 0.0229 | 15.76 |
| Histone H1.4<br>OS=Homo sapiens<br>GN=HIST1H1E PE=1<br>SV=2 | sp P10412 H14_HUMAN, tr A3ROT8 A3ROT8_HUMAN, tr Q4VB24 Q4VB24_HUMAN | sGVS<br>LAAL<br>k  | 95% | 58.2 | 50.43056 | Ref | -1.7  | 0.52  | -2.6  | -0.2   | -0.61 | -0.35 | -0.42 | 4E+05 | 89500 | 5E+05 | 57300 | 343000 | 2E+05 | 3E+05 | 266000 | 485.3 | 1452.9 | 3 | 0.0152 | 10.44 |
| Histone H1.4<br>OS=Homo sapiens<br>GN=HIST1H1E PE=1<br>SV=2 | sp P10412 H14_HUMAN, tr A3ROT8 A3ROT8_HUMAN, tr Q4VB24 Q4VB24_HUMAN | sGVS<br>LAAL<br>kk | 71% | 29.2 | 47.59396 | Ref | -0.89 | 0.037 | -0.93 | -0.29  | -0.44 | -0.35 | -0.35 | 7130  | 4040  | 8330  | 4770  | 8220   | 6440  | 7180  | 7150   | 472.3 | 1885.2 | 4 | 0.0332 | 17.59 |
| Histone H1.4<br>OS=Homo sapiens<br>GN=HIST1H1E PE=1<br>SV=2 | sp P10412 H14_HUMAN, tr A3ROT8 A3ROT8_HUMAN, tr Q4VB24 Q4VB24_HUMAN | sGVS<br>LAAL<br>kk | 93% | 40.6 | 47.89087 | Ref | -2    | 0.25  | -1.8  | -0.064 | -0.44 | -0.08 | -0.23 | 3950  | 1050  | 5410  | 1480  | 5370   | 3600  | 4840  | 4320   | 943.6 | 1885.2 | 2 | 0.0375 | 19.86 |
| Histone H1.4<br>OS=Homo sapiens<br>GN=HIST1H1E PE=1<br>SV=2 | sp P10412 H14_HUMAN, tr A3ROT8 A3ROT8_HUMAN, tr Q4VB24 Q4VB24_HUMAN | sGVS<br>LAAL<br>kk | 59% | 27.6 | 46.83047 | Ref | -1.6  | 0.13  | -1.9  | -0.082 | -0.42 | -0.13 | -0.15 | 52000 | 17400 | 64000 | 17900 | 68200  | 47200 | 60300 | 58800  | 629.4 | 1885.2 | 3 | 0.0228 | 12.1  |

|                                                             |                                                                     |                                   |     |      |          |     |      |       |       |       |       |       |       |       |       |       |       |        |       |       |        |       |        |   |        |       |
|-------------------------------------------------------------|---------------------------------------------------------------------|-----------------------------------|-----|------|----------|-----|------|-------|-------|-------|-------|-------|-------|-------|-------|-------|-------|--------|-------|-------|--------|-------|--------|---|--------|-------|
| Histone H1.4<br>OS=Homo sapiens<br>GN=HIST1H1E PE=1<br>SV=2 | sp P10412 H14_HUMAN, tr A3R0T8 A3R0T8_HUMAN, tr Q4VB24 Q4VB24_HUMAN | sGVS<br>LAAL<br>kk                | 92% | 38.8 | 46.70923 | Ref | -2.1 | 0.25  | -2.1  | 0.03  | -0.4  | -0.08 | -0.15 | 1E+05 | 32900 | 2E+05 | 41400 | 195000 | 1E+05 | 2E+05 | 155000 | 472.3 | 1885.2 | 4 | 0.0206 | 10.94 |
| Histone H1.4<br>OS=Homo sapiens<br>GN=HIST1H1E PE=1<br>SV=2 | sp P10412 H14_HUMAN, tr A3R0T8 A3R0T8_HUMAN, tr Q4VB24 Q4VB24_HUMAN | sGVS<br>LAAL<br>kk                | 84% | 35.5 | 47.67482 | Ref | -1.1 | 0.055 | -1.1  | -0.11 | -0.62 | -0.22 | -0.23 | 29200 | 16000 | 37800 | 19700 | 41600  | 25700 | 35400 | 34700  | 629.4 | 1885.2 | 3 | 0.0355 | 18.79 |
| Histone H1.4<br>OS=Homo sapiens<br>GN=HIST1H1E PE=1<br>SV=2 | sp P10412 H14_HUMAN, tr A3R0T8 A3R0T8_HUMAN, tr Q4VB24 Q4VB24_HUMAN | sGVS<br>LAAL<br>kk                | 94% | 39.8 | 45.39741 | Ref | -1.7 | 0.19  | -1.8  | 0.011 | -0.48 | -0.13 | -0.28 | 7640  | 2460  | 9700  | 2710  | 10600  | 6600  | 8770  | 7870   | 943.6 | 1885.2 | 2 | 0.0058 | 3.093 |
| Uncharacterized protein OS=Bos taurus GN=Bt.24937 PE=4 SV=1 | tr E1BKK7 E1BKK7_BOVIN                                              | aPLN<br>VQF<br>SSPG<br>PGD<br>AVk | 56% | 34.5 | 54.08703 | Ref | 0.62 | -0.89 | -1.2  | 0.16  | 0.43  | -0.84 | -1.3  | 23700 | 25300 | 9660  | 8750  | 24700  | 26000 | 11200 | 8370   | 764.8 | 2291.3 | 3 | 0.0147 | 6.392 |
| Uncharacterized protein OS=Bos taurus GN=Bt.24937 PE=4 SV=1 | tr E1BKK7 E1BKK7_BOVIN                                              | aTQT<br>GDA<br>Sk                 | 86% | 41.3 | 52.39197 | Ref | 0.21 | -0.62 | -0.14 | -0.25 | 0.14  | -0.27 | -0.39 | 27100 | 28100 | 17200 | 26900 | 27400  | 31400 | 24700 | 22600  | 496.3 | 1485.8 | 3 | 0.0113 | 7.574 |
| Uncharacterized protein OS=Bos taurus GN=Bt.24937 PE=4 SV=1 | tr E1BKK7 E1BKK7_BOVIN                                              | aTQT<br>GDA<br>Sk                 | 51% | 31.5 | 52.27966 | Ref | 0.23 | -0.54 | -0.1  | -0.26 | 0.2   | -0.85 | -0.21 | 20700 | 20700 | 13100 | 19900 | 19600  | 23600 | 11900 | 18400  | 743.9 | 1485.8 | 2 | 0.0085 | 5.727 |

|                                                             |                        |                                         |     |      |          |     |        |       |       |        |       |       |       |       |       |       |       |       |       |       |       |       |        |   |        |       |
|-------------------------------------------------------------|------------------------|-----------------------------------------|-----|------|----------|-----|--------|-------|-------|--------|-------|-------|-------|-------|-------|-------|-------|-------|-------|-------|-------|-------|--------|---|--------|-------|
| Uncharacterized protein OS=Bos taurus GN=Bt.24937 PE=4 SV=1 | tr E1BKK7 E1BKK7_BOVIN | aWG<br>PGL<br>HGGL<br>VGR               | 95% | 57.2 | 52.42424 | Ref | 0.37   | -0.52 | -0.22 | -0.25  | -0.12 | -0.29 | -0.27 | 26800 | 31600 | 18500 | 25600 | 27500 | 26400 | 24400 | 24600 | 527.6 | 1579.9 | 3 | 0.0097 | 6.13  |
| Uncharacterized protein OS=Bos taurus GN=Bt.24937 PE=4 SV=1 | tr E1BKK7 E1BKK7_BOVIN | dAG<br>EGLL<br>AVQI<br>TDQ<br>EGkP<br>k | 83% | 39   | 53.3101  | Ref | -0.045 | -0.43 | -0.04 | -0.093 | 0.062 | -0.43 | -0.25 | 9030  | 7870  | 6550  | 9650  | 10200 | 9940  | 7360  | 8280  | 721.2 | 2880.6 | 4 | 0.0126 | 4.369 |
| Uncharacterized protein OS=Bos taurus GN=Bt.24937 PE=4 SV=1 | tr E1BKK7 E1BKK7_BOVIN | dAG<br>YGGI<br>SLAV<br>EGPS<br>k        | 95% | 68.9 | 54.18816 | Ref | 0.087  | -0.27 | -0.29 | -0.064 | 0.052 | -0.75 | -0.3  | 14600 | 12200 | 10400 | 11400 | 14800 | 14000 | 8380  | 11400 | 710.4 | 2128.2 | 3 | 0.0126 | 5.921 |
| Uncharacterized protein OS=Bos taurus GN=Bt.24937 PE=4 SV=1 | tr E1BKK7 E1BKK7_BOVIN | dLDII<br>DNY<br>DYS<br>HTVk             | 79% | 40.4 | 54.44479 | Ref | 0.12   | -0.17 | -0.18 | -0.21  | -0.07 | -0.48 | -0.15 | 6350  | 6530  | 5790  | 6470  | 6970  | 6690  | 5290  | 6580  | 807.1 | 2418.2 | 3 | 0.0172 | 7.105 |
| Uncharacterized protein OS=Bos taurus GN=Bt.24937 PE=4 SV=1 | tr E1BKK7 E1BKK7_BOVIN | eAG<br>AGG<br>LSIA<br>VEG<br>PSK        | 95% | 82   | 53.56882 | Ref | 0.3    | -0.37 | -0.1  | -0.4   | -0.37 | -0.37 | -0.22 | 9060  | 8660  | 5920  | 7980  | 7190  | 6390  | 6700  | 7360  | 684.4 | 2050.1 | 3 | 0.0158 | 7.727 |
| Uncharacterized protein OS=Bos taurus GN=Bt.24937 PE=4 SV=1 | tr E1BKK7 E1BKK7_BOVIN | eATT<br>DFTV<br>DSR                     | 88% | 39   | 50.26386 | Ref | 0.39   | -0.43 | -0.09 | -0.28  | -0.11 | -0.77 | -0.38 | 23000 | 23400 | 14400 | 20400 | 19700 | 19300 | 12800 | 16700 | 773.4 | 1544.7 | 2 | 0.0128 | 8.279 |

|                                                             |                        |                               |     |      |          |     |                               |                               |                                |                        |                               |                        |                              |                               |                                |                        |                               |                        |                              |       |        |       |        |       |        |       |
|-------------------------------------------------------------|------------------------|-------------------------------|-----|------|----------|-----|-------------------------------|-------------------------------|--------------------------------|------------------------|-------------------------------|------------------------|------------------------------|-------------------------------|--------------------------------|------------------------|-------------------------------|------------------------|------------------------------|-------|--------|-------|--------|-------|--------|-------|
| Uncharacterized protein OS=Bos taurus GN=Bt.24937 PE=4 SV=1 | tr E1BKK7 E1BKK7_BOVIN | fNDE HIPE SPVV VPVI APS DDA R | 92% | 48.5 | 54.71384 | Ref | Reference Missing (0.1466588) | Reference Missing (0.0182687) | Reference Missing (0.38146585) | No Values (-1.2688136) | Reference Missing (0.2994485) | No Values (-1.1357077) | Reference Missing (0.273898) | Reference Missing (0.0182687) | Reference Missing (0.38146585) | No Values (-1.2688136) | Reference Missing (0.2994485) | No Values (-1.1357077) | Reference Missing (0.273898) | 957.8 | 2870.4 | 3     | 0.0218 | 7.607 |        |       |
| Uncharacterized protein OS=Bos taurus GN=Bt.24937 PE=4 SV=1 | tr E1BKK7 E1BKK7_BOVIN | gAG TGG LGLT VEG PcEA k       | 83% | 41.9 | 54.37994 | Ref | -0.16                         | -0.17                         | -0.07                          | -0.038                 | -0.17                         | -0.82                  | -0.19                        | 5720                          | 3810                           | 4100                   | 4920                          | 5550                   | 4410                         | 2940  | 4520   | 757.7 | 2270.2 | 3     | 0.014  | 6.181 |
| Uncharacterized protein OS=Bos taurus GN=Bt.24937 PE=4 SV=1 | tr E1BKK7 E1BKK7_BOVIN | gLHV VEVY YDD VPV PNSP Fk     | 95% | 63.8 | 55.05881 | Ref | 0.23                          | -0.5                          | -0.33                          | -0.25                  | 0.14                          | -0.46                  | -0.11                        | 787                           | 846                            | 552                    | 702                           | 815                    | 933                          | 643   | 810    | 940.8 | 2819.5 | 3     | 0.0213 | 7.567 |
| Uncharacterized protein OS=Bos taurus GN=Bt.24937 PE=4 SV=1 | tr E1BKK7 E1BKK7_BOVIN | hVG NQQ YNV TYVV k            | 90% | 46.3 | 54.32761 | Ref | 0.21                          | -0.59                         | -0.06                          | -0.25                  | -0.01                         | -0.42                  | -0.07                        | 7690                          | 8610                           | 5360                   | 8710                          | 8380                   | 8670                         | 6800  | 8600   | 753.1 | 2256.2 | 3     | 0.0166 | 7.349 |
| Uncharacterized protein OS=Bos taurus GN=Bt.24937 PE=4 SV=1 | tr E1BKK7 E1BKK7_BOVIN | rLTV LSLQ ESGL k              | 87% | 36.9 | 49.29557 | Ref | 0.19                          | -0.19                         | -0.34                          | -0.23                  | -0.21                         | -0.39                  | -0.02                        | 5100                          | 5400                           | 4510                   | 4540                          | 5410                   | 4810                         | 4430  | 5650   | 513.8 | 2051.2 | 4     | 0.0129 | 6.298 |
| Uncharacterized protein OS=Bos taurus GN=Bt.24937 PE=4 SV=1 | tr E1BKK7 E1BKK7_BOVIN | sPFE VNV DK                   | 91% | 43.8 | 52.7114  | Ref | 0.48                          | -0.48                         | -0.11                          | -0.31                  | 0.035                         | -0.96                  | -0.37                        | 25500                         | 29400                          | 16400                  | 23800                         | 22800                  | 25300                        | 13300 | 19800  | 822   | 1641.9 | 2     | 0.0134 | 8.159 |



|                                                             |                        |                             |     |      |          |     |      |       |       |       |       |       |       |       |       |       |       |       |       |       |       |       |        |   |        |       |
|-------------------------------------------------------------|------------------------|-----------------------------|-----|------|----------|-----|------|-------|-------|-------|-------|-------|-------|-------|-------|-------|-------|-------|-------|-------|-------|-------|--------|---|--------|-------|
| Uncharacterized protein OS=Bos taurus GN=Bt.24937 PE=4 SV=1 | tr E1BKK7 E1BKK7_BOVIN | sPFT<br>VGV<br>AAPL<br>DLSR | 95% | 55.2 | 53.29502 | Ref | 0.35 | -0.37 | -0.12 | -0.28 | -0.07 | -0.56 | -0.24 | 5740  | 6740  | 4420  | 5920  | 5850  | 5890  | 4380  | 5410  | 917.5 | 1833   | 2 | 0.0061 | 3.315 |
| Uncharacterized protein OS=Bos taurus GN=Bt.24937 PE=4 SV=1 | tr E1BKK7 E1BKK7_BOVIN | tFEM<br>SDFI<br>VDT<br>R    | 90% | 41.4 | 51.63212 | Ref | 0.3  | -0.26 | -0.12 | -0.25 | -0.04 | -0.58 | -0.16 | 9370  | 11700 | 8650  | 10700 | 10800 | 10900 | 7830  | 10300 | 882.9 | 1763.9 | 2 | 0.0091 | 5.174 |
| Uncharacterized protein OS=Bos taurus GN=Bt.24937 PE=4 SV=1 | tr E1BKK7 E1BKK7_BOVIN | tGEE<br>VGF<br>VVD<br>AK    | 88% | 43.9 | 53.5306  | Ref | 0.16 | -0.55 | 0.13  | -0.44 | 0.028 | -1    | -0.2  | 33200 | 27100 | 17900 | 32100 | 23900 | 28900 | 14800 | 25600 | 620.3 | 1858   | 3 | 0.0171 | 9.217 |
| Uncharacterized protein OS=Bos taurus GN=Bt.24937 PE=4 SV=1 | tr E1BKK7 E1BKK7_BOVIN | vDIQ<br>TEDL<br>EDG<br>Tck  | 95% | 59.2 | 52.59549 | Ref | 0.27 | -0.45 | -0.12 | -0.12 | -0.09 | -0.44 | -0.52 | 20700 | 20600 | 13600 | 19100 | 21100 | 18700 | 15300 | 14400 | 740.7 | 2219.1 | 3 | 0.0187 | 8.409 |
| Uncharacterized protein OS=Bos taurus GN=Bt.24937 PE=4 SV=1 | tr E1BKK7 E1BKK7_BOVIN | vEPA<br>VDTS<br>R           | 74% | 34.5 | 50.89035 | Ref | 0.26 | -0.39 | -0.22 | -0.21 | -0.06 | -0.68 | -0.2  | 8690  | 8420  | 5790  | 7310  | 8140  | 7890  | 5360  | 7410  | 639.3 | 1276.7 | 2 | 0.0107 | 8.388 |
| Uncharacterized protein OS=Bos taurus GN=Bt.24937 PE=4 SV=1 | tr E1BKK7 E1BKK7_BOVIN | VLPT<br>VDAS<br>k           | 80% | 37.2 | 52.02191 | Ref | 0.2  | -0.49 | -0.2  | -0.1  | 0.079 | -0.69 | -0.2  | 28100 | 28000 | 18900 | 25900 | 30500 | 30200 | 18500 | 25800 | 801.5 | 1600.9 | 2 | 0.0148 | 9.209 |

|                                                                                |                        |                               |     |      |          |     |      |       |       |        |       |       |       |       |       |       |       |       |       |       |       |       |        |   |        |       |
|--------------------------------------------------------------------------------|------------------------|-------------------------------|-----|------|----------|-----|------|-------|-------|--------|-------|-------|-------|-------|-------|-------|-------|-------|-------|-------|-------|-------|--------|---|--------|-------|
| Uncharacterized protein OS=Bos taurus GN=Bt.24937 PE=4 SV=1                    | tr E1BKX7 E1BKX7_BOVIN | vLQS<br>FTVD<br>SSk           | 93% | 48.5 | 53.11067 | Ref | 0.14 | -0.38 | -0.28 | -0.35  | -0.1  | -0.6  | 0.17  | 4880  | 4550  | 3440  | 4160  | 4370  | 4510  | 3330  | 5650  | 607   | 1818   | 3 | 0.0127 | 7.004 |
| Uncharacterized protein OS=Bos taurus GN=Bt.24937 PE=4 SV=1                    | tr E1BKX7 E1BKX7_BOVIN | vQA<br>QGP<br>GLk             | 78% | 35.1 | 49.45936 | Ref | 0.12 | -0.4  | -0.1  | -0.064 | 0.013 | -0.39 | -0.17 | 22800 | 26400 | 19900 | 27600 | 31100 | 28700 | 22600 | 26200 | 502.6 | 1504.9 | 3 | 0.0062 | 4.119 |
| Uncharacterized protein OS=Bos taurus GN=Bt.24937 PE=4 SV=1                    | tr E1BKX7 E1BKX7_BOVIN | vTGL<br>HK                    | 52% | 27.7 | 48.08332 | Ref | 0.31 | -0.62 | -0.02 | -0.35  | 0.13  | -0.64 | -0.26 | 44600 | 48900 | 27900 | 47300 | 41600 | 50800 | 31000 | 40200 | 421.6 | 1261.8 | 3 | 0.0046 | 3.653 |
| Uncharacterized protein OS=Bos taurus GN=Bt.24937 PE=4 SV=1                    | tr E1BKX7 E1BKX7_BOVIN | yADE<br>EIPR                  | 76% | 34.4 | 50.34376 | Ref | 0.25 | -0.44 | -0.09 | -0.26  | 0.059 | -0.77 | -0.17 | 92700 | 95900 | 64500 | 92400 | 90700 | 98500 | 57800 | 87200 | 648.8 | 1295.7 | 2 | 0.01   | 7.703 |
| Heterogeneous nuclear ribonucleoprotein A/B OS=Bos taurus GN=HNRNPAB PE=2 SV=1 | tr Q3ZC44 Q3ZC44_BOVIN | eVY<br>QQQ<br>QYG<br>SGG<br>R | 92% | 45.7 | 51.18906 | Ref | -0.1 | 0.16  | -0.17 | -0.28  | 0.22  | -0.51 | 0.28  | 10100 | 8150  | 10600 | 9470  | 9670  | 12000 | 7550  | 12900 | 602   | 1802.9 | 3 | 0.0152 | 8.453 |

|                                                                                |                        |                               |     |      |          |     |        |       |       |        |      |       |       |       |       |       |       |       |       |       |       |       |        |   |        |       |
|--------------------------------------------------------------------------------|------------------------|-------------------------------|-----|------|----------|-----|--------|-------|-------|--------|------|-------|-------|-------|-------|-------|-------|-------|-------|-------|-------|-------|--------|---|--------|-------|
| Heterogeneous nuclear ribonucleoprotein A/B OS=Bos taurus GN=HNRNPAB PE=2 SV=1 | tr Q3ZC44 Q3ZC44_BOVIN | eVY<br>QQQ<br>QYG<br>SGG<br>R | 59% | 31.8 | 51.23231 | Ref | -0.1   | 0.058 | -0.06 | -0.25  | 0.34 | -0.51 | 0.22  | 8220  | 7050  | 8570  | 8860  | 8580  | 11300 | 6520  | 10700 | 902.4 | 1802.9 | 2 | 0.0129 | 7.163 |
| Heterogeneous nuclear ribonucleoprotein A/B OS=Bos taurus GN=HNRNPAB PE=2 SV=1 | tr Q3ZC44 Q3ZC44_BOVIN | fGEV<br>VDcT<br>lk            | 85% | 41.8 | 53.23683 | Ref | -0.22  | -0.28 | 0.085 | -0.18  | 0.28 | -0.35 | 0.25  | 29900 | 21600 | 22500 | 32500 | 29800 | 35900 | 24300 | 36400 | 589   | 1763.9 | 3 | 0.0137 | 7.782 |
| Heterogeneous nuclear ribonucleoprotein A/B OS=Bos taurus GN=HNRNPAB PE=2 SV=1 | tr Q3ZC44 Q3ZC44_BOVIN | fGEV<br>VDcT<br>lk            | 88% | 43.9 | 53.25087 | Ref | 0.063  | -0.37 | 0.054 | -0.083 | 0.24 | -0.47 | 0.014 | 14400 | 11600 | 9280  | 14000 | 14000 | 15300 | 9800  | 13600 | 589   | 1763.9 | 3 | 0.0128 | 7.255 |
| Heterogeneous nuclear ribonucleoprotein A/B OS=Bos taurus GN=HNRNPAB PE=2 SV=1 | tr Q3ZC44 Q3ZC44_BOVIN | fGEV<br>VDcT<br>lk            | 87% | 41.6 | 53.2035  | Ref | -4E-04 | -0.09 | -0.11 | -0.061 | 0.13 | -0.36 | 0.21  | 3490  | 3050  | 3120  | 3450  | 3930  | 3910  | 2910  | 4290  | 883   | 1763.9 | 2 | 0.0164 | 9.319 |

|                                                                                |                        |              |     |      |          |     |        |       |       |        |       |       |       |       |      |       |      |       |       |      |       |     |        |   |        |       |
|--------------------------------------------------------------------------------|------------------------|--------------|-----|------|----------|-----|--------|-------|-------|--------|-------|-------|-------|-------|------|-------|------|-------|-------|------|-------|-----|--------|---|--------|-------|
| Heterogeneous nuclear ribonucleoprotein A/B OS=Bos taurus GN=HNRNPAB PE=2 SV=1 | tr Q3ZC44 Q3ZC44_BOVIN | fGEV VDcT lk | 93% | 49   | 53.24663 | Ref | -0.16  | -0.01 | -0.32 | -0.14  | 0.19  | -0.19 | 0.19  | 8350  | 5910 | 7150  | 6470 | 8030  | 8820  | 7090 | 9140  | 589 | 1763.9 | 3 | 0.0113 | 6.422 |
| Heterogeneous nuclear ribonucleoprotein A/B OS=Bos taurus GN=HNRNPAB PE=2 SV=1 | tr Q3ZC44 Q3ZC44_BOVIN | fGEV VDcT lk | 70% | 36.5 | 53.23327 | Ref | 0.082  | -0.38 | -0.02 | -0.17  | 0.19  | -0.29 | 0.035 | 6400  | 5060 | 3990  | 5750 | 5710  | 6370  | 4770 | 5950  | 589 | 1763.9 | 3 | 0.011  | 6.218 |
| Heterogeneous nuclear ribonucleoprotein A/B OS=Bos taurus GN=HNRNPAB PE=2 SV=1 | tr Q3ZC44 Q3ZC44_BOVIN | fGEV VDcT lk | 83% | 40.8 | 53.23683 | Ref | -0.081 | -0.16 | -0.13 | -0.049 | 0.007 | -0.11 | 0.21  | 3070  | 2440 | 2500  | 2880 | 3350  | 3040  | 2930 | 3630  | 589 | 1763.9 | 3 | 0.0137 | 7.782 |
| Heterogeneous nuclear ribonucleoprotein A/B OS=Bos taurus GN=HNRNPAB PE=2 SV=1 | tr Q3ZC44 Q3ZC44_BOVIN | gFGF lLFk    | 54% | 30.4 | 50.43103 | Ref | -0.31  | 0.082 | -0.31 | -0.29  | 0.23  | -0.35 | 0.21  | 14400 | 8170 | 11600 | 9940 | 11100 | 13900 | 9710 | 14200 | 513 | 1535.9 | 3 | 0.0153 | 9.953 |

|                                                                                |                        |           |     |      |          |     |       |       |       |       |       |       |      |       |       |       |       |       |       |       |       |     |        |   |        |       |
|--------------------------------------------------------------------------------|------------------------|-----------|-----|------|----------|-----|-------|-------|-------|-------|-------|-------|------|-------|-------|-------|-------|-------|-------|-------|-------|-----|--------|---|--------|-------|
| Heterogeneous nuclear ribonucleoprotein A/B OS=Bos taurus GN=HNRNPAB PE=2 SV=1 | tr Q3ZC44 Q3ZC44_BOVIN | gFGF ILFk | 87% | 38.4 | 50.40741 | Ref | -0.44 | 0.07  | -0.09 | -0.13 | 0.3   | -0.42 | 0.27 | 39900 | 24900 | 38500 | 38700 | 41400 | 48700 | 30900 | 49600 | 769 | 1535.9 | 2 | 0.0136 | 8.876 |
| Heterogeneous nuclear ribonucleoprotein A/B OS=Bos taurus GN=HNRNPAB PE=2 SV=1 | tr Q3ZC44 Q3ZC44_BOVIN | gFGF ILFk | 61% | 31.6 | 50.40741 | Ref | -0.47 | -0.13 | -0.17 | -0.2  | 0.29  | -0.46 | 0.65 | 27100 | 18200 | 25100 | 27500 | 29600 | 36200 | 22500 | 48300 | 513 | 1535.9 | 3 | 0.014  | 9.133 |
| Heterogeneous nuclear ribonucleoprotein A/B OS=Bos taurus GN=HNRNPAB PE=2 SV=1 | tr Q3ZC44 Q3ZC44_BOVIN | gFGF ILFk | 87% | 38.6 | 50.40741 | Ref | -0.33 | 0.071 | -0.1  | -0.15 | 0.27  | -0.34 | 0.25 | 2400  | 1690  | 2420  | 2410  | 2560  | 2990  | 2050  | 3060  | 769 | 1535.9 | 2 | 0.0138 | 8.954 |
| Heterogeneous nuclear ribonucleoprotein A/B OS=Bos taurus GN=HNRNPAB PE=2 SV=1 | tr Q3ZC44 Q3ZC44_BOVIN | gFGF ILFk | 63% | 31.5 | 49.92845 | Ref | -0.41 | -0.05 | -0.19 | -0.19 | 0.077 | -0.32 | 0.65 | 4390  | 3030  | 4200  | 4300  | 4720  | 4970  | 3940  | 7680  | 513 | 1535.9 | 3 | 0.0027 | 1.735 |

|                                                                                |                        |                         |     |      |          |     |       |      |       |        |      |       |       |       |      |       |       |       |       |      |       |       |        |   |        |       |
|--------------------------------------------------------------------------------|------------------------|-------------------------|-----|------|----------|-----|-------|------|-------|--------|------|-------|-------|-------|------|-------|-------|-------|-------|------|-------|-------|--------|---|--------|-------|
| Heterogeneous nuclear ribonucleoprotein A/B OS=Bos taurus GN=HNRNPAB PE=2 SV=1 | tr Q3ZC44 Q3ZC44_BOVIN | gFGF ILFk               | 62% | 31.6 | 50.52948 | Ref | -0.2  | 0.11 | -0.17 | -0.13  | 0.36 | -0.44 | 0.11  | 1100  | 841  | 1130  | 1050  | 1180  | 1450  | 869  | 1260  | 769   | 1535.9 | 2 | 0.0179 | 11.66 |
| Heterogeneous nuclear ribonucleoprotein A/B OS=Bos taurus GN=HNRNPAB PE=2 SV=1 | tr Q3ZC44 Q3ZC44_BOVIN | gSG GGG GSG GQG STNy Gk | 95% | 85.9 | 52.28167 | Ref | -0.36 | 0.26 | -0.05 | -0.084 | 0.31 | -0.49 | 0.085 | 5060  | 3560 | 5940  | 5370  | 5800  | 6640  | 3980 | 5900  | 698.3 | 2092   | 3 | 0.022  | 10.52 |
| Heterogeneous nuclear ribonucleoprotein A/B OS=Bos taurus GN=HNRNPAB PE=2 SV=1 | tr Q3ZC44 Q3ZC44_BOVIN | gSG GGG GSG GQG STNy Gk | 95% | 71.4 | 51.87811 | Ref | -0.26 | 0.14 | 0.005 | -0.15  | 0.29 | -0.38 | 0.077 | 10400 | 7840 | 11200 | 11500 | 11300 | 13500 | 8870 | 12100 | 698.7 | 2093   | 3 | 0.017  | 8.095 |
| Heterogeneous nuclear ribonucleoprotein A/B OS=Bos taurus GN=HNRNPAB PE=2 SV=1 | tr Q3ZC44 Q3ZC44_BOVIN | gSG GGG GSG GQG STNy Gk | 95% | 51.9 | 54.4576  | Ref | -0.26 | 0.39 | -0.14 | -0.33  | 0.28 | -0.51 | 0.19  | 5530  | 4250 | 7260  | 5660  | 5440  | 7290  | 4390 | 7060  | 600.1 | 2396.2 | 4 | 0.0219 | 9.116 |

|                                                                                |                        |                                        |     |      |          |     |        |       |       |       |      |       |       |       |       |       |       |       |       |       |       |       |        |   |        |       |
|--------------------------------------------------------------------------------|------------------------|----------------------------------------|-----|------|----------|-----|--------|-------|-------|-------|------|-------|-------|-------|-------|-------|-------|-------|-------|-------|-------|-------|--------|---|--------|-------|
| Heterogeneous nuclear ribonucleoprotein A/B OS=Bos taurus GN=HNRNPAB PE=2 SV=1 | tr Q3ZC44 Q3ZC44_BOVIN | gSG<br>GGG<br>GSG<br>GQG<br>STNy<br>Gk | 95% | 56.6 | 54.39514 | Ref | -0.21  | 0.43  | -0.04 | -0.48 | 0.16 | -0.46 | 0.23  | 11400 | 9250  | 15700 | 12700 | 10300 | 14000 | 9530  | 15300 | 600.1 | 2396.2 | 4 | 0.0275 | 11.45 |
| Heterogeneous nuclear ribonucleoprotein A/B OS=Bos taurus GN=HNRNPAB PE=2 SV=1 | tr Q3ZC44 Q3ZC44_BOVIN | iFVG<br>GLN<br>PEAT<br>EEk             | 89% | 45.4 | 54.02774 | Ref | -0.27  | -0.01 | -0.12 | -0.14 | 0.27 | -0.37 | 0.28  | 30000 | 21700 | 28100 | 29100 | 31800 | 36700 | 24700 | 38300 | 704.7 | 2111.1 | 3 | 0.0333 | 15.77 |
| Heterogeneous nuclear ribonucleoprotein A/B OS=Bos taurus GN=HNRNPAB PE=2 SV=1 | tr Q3ZC44 Q3ZC44_BOVIN | iFVG<br>GLN<br>PEAT<br>EEk             | 95% | 48.7 | 54.00593 | Ref | -0.37  | 0.077 | 4E-04 | -0.18 | 0.27 | -0.49 | 0.26  | 2450  | 1610  | 2390  | 2540  | 2470  | 2950  | 1820  | 3040  | 1057  | 2111.2 | 2 | 0.0207 | 9.815 |
| Heterogeneous nuclear ribonucleoprotein A/B OS=Bos taurus GN=HNRNPAB PE=2 SV=1 | tr Q3ZC44 Q3ZC44_BOVIN | iFVG<br>GLN<br>PEAT<br>EEk             | 92% | 48.2 | 53.96759 | Ref | 0.0039 | -0.02 | 0.048 | -0.23 | 0.17 | -0.3  | -0.07 | 10300 | 8340  | 8930  | 10500 | 9540  | 11000 | 8300  | 9640  | 704.7 | 2111.2 | 3 | 0.0196 | 9.264 |

|                                                                                |                        |                            |     |      |           |     |       |       |       |        |      |       |       |       |       |       |       |       |       |       |       |       |        |   |        |       |
|--------------------------------------------------------------------------------|------------------------|----------------------------|-----|------|-----------|-----|-------|-------|-------|--------|------|-------|-------|-------|-------|-------|-------|-------|-------|-------|-------|-------|--------|---|--------|-------|
| Heterogeneous nuclear ribonucleoprotein A/B OS=Bos taurus GN=HNRNPAB PE=2 SV=1 | tr Q3ZC44 Q3ZC44_BOVIN | iFVG<br>GLN<br>PEAT<br>EEk | 95% | 55.1 | 53.9909   | Ref | -0.28 | -0.02 | -0.26 | -0.093 | 0.14 | -0.14 | 0.25  | 36600 | 24400 | 31700 | 30000 | 37300 | 38300 | 32900 | 42900 | 704.7 | 2111.2 | 3 | 0.0188 | 8.923 |
| Heterogeneous nuclear ribonucleoprotein A/B OS=Bos taurus GN=HNRNPAB PE=2 SV=1 | tr Q3ZC44 Q3ZC44_BOVIN | iFVG<br>GLN<br>PEAT<br>EEk | 79% | 38.8 | 53.97575  | Ref | -0.2  | 0.28  | -0.28 | -0.33  | 0.29 | -0.43 | 0.079 | 3210  | 2150  | 3240  | 2480  | 2650  | 3540  | 2240  | 3170  | 1057  | 2111.2 | 2 | 0.0188 | 8.887 |
| Heterogeneous nuclear ribonucleoprotein A/B OS=Bos taurus GN=HNRNPAB PE=2 SV=1 | tr Q3ZC44 Q3ZC44_BOVIN | iFVG<br>GLN<br>PEAT<br>EEk | 86% | 43   | 53.976801 | Ref | -0.19 | -0.07 | -0.11 | -0.16  | 0.22 | -0.29 | 0.23  | 12800 | 9420  | 11100 | 12100 | 12900 | 14700 | 10700 | 15300 | 704.7 | 2111.2 | 3 | 0.008  | 3.81  |
| Heterogeneous nuclear ribonucleoprotein A/B OS=Bos taurus GN=HNRNPAB PE=2 SV=1 | tr Q3ZC44 Q3ZC44_BOVIN | iFVG<br>GLN<br>PEAT<br>EEk | 67% | 36.4 | 53.97971  | Ref | -0.22 | -0.34 | -0.15 | -0.021 | 0.05 | 0.33  | 0.32  | 7960  | 7610  | 7630  | 9740  | 11800 | 10800 | 13600 | 13500 | 704.7 | 2111.2 | 3 | 0.0203 | 9.619 |



|                                                                                |                        |                                 |     |      |          |     |        |       |       |        |       |       |       |      |      |      |      |      |       |      |      |       |        |   |        |       |
|--------------------------------------------------------------------------------|------------------------|---------------------------------|-----|------|----------|-----|--------|-------|-------|--------|-------|-------|-------|------|------|------|------|------|-------|------|------|-------|--------|---|--------|-------|
| Heterogeneous nuclear ribonucleoprotein A/B OS=Bos taurus GN=HNRNPAB PE=2 SV=1 | tr Q3ZC44 Q3ZC44_BOVIN | kIFV<br>GGL<br>NPE<br>ATEE<br>k | 64% | 33.2 | 53.13467 | Ref | -0.18  | -0.15 | 0.024 | -0.13  | 0.25  | -0.08 | 0.011 | 8890 | 6880 | 7600 | 9650 | 9560 | 10900 | 9050 | 9540 | 636.9 | 2543.4 | 4 | 0.0294 | 11.57 |
| Heterogeneous nuclear ribonucleoprotein A/B OS=Bos taurus GN=HNRNPAB PE=2 SV=1 | tr Q3ZC44 Q3ZC44_BOVIN | kIFV<br>GGL<br>NPE<br>ATEE<br>k | 89% | 43.5 | 52.11211 | Ref | -0.12  | -0.13 | 0.08  | -0.007 | 0.13  | -0.19 | 0.055 | 5450 | 4560 | 4940 | 6400 | 6640 | 6350  | 5340 | 6270 | 848.8 | 2543.5 | 3 | 0.0051 | 2.004 |
| Heterogeneous nuclear ribonucleoprotein A/B OS=Bos taurus GN=HNRNPAB PE=2 SV=1 | tr Q3ZC44 Q3ZC44_BOVIN | mDP<br>nTG<br>R                 | 53% | 25.8 | 46.08494 | Ref | -0.4   | 0.059 | -0.23 | -0.088 | 0.34  | -0.47 | 0.34  | 1280 | 845  | 1260 | 1160 | 1400 | 1650  | 984  | 1710 | 556.3 | 1110.5 | 2 | 0.0058 | 5.258 |
| Triosephosphate isomerase OS=Bos taurus GN=TP11 PE=2 SV=3                      | sp Q5E956 TPIS_BOVIN   | dLGA<br>TWV<br>VLG<br>HSER      | 91% | 46.8 | 53.50758 | Ref | 0.0034 | -0.07 | -0.08 | -0.037 | -0.07 | 0.068 | -0.1  | 2270 | 2140 | 2210 | 2460 | 2800 | 2380  | 2740 | 2420 | 615.3 | 1843   | 3 | 0.0054 | 2.935 |
| Triosephosphate isomerase OS=Bos taurus GN=TP11 PE=2 SV=3                      | sp Q5E956 TPIS_BOVIN   | dLGA<br>TWV<br>VLG<br>HSER      | 95% | 63.4 | 53.48922 | Ref | 0.38   | -0.33 | 0.086 | -0.069 | -0.13 | 0.029 | -0.53 | 5250 | 6030 | 4000 | 5980 | 5920 | 4970  | 5780 | 3910 | 615.3 | 1843   | 3 | 0.0131 | 7.116 |

|                                                           |                      |                            |     |      |          |     |        |       |       |        |       |       |       |      |      |      |      |      |      |      |      |       |      |   |        |       |
|-----------------------------------------------------------|----------------------|----------------------------|-----|------|----------|-----|--------|-------|-------|--------|-------|-------|-------|------|------|------|------|------|------|------|------|-------|------|---|--------|-------|
| Triosephosphate isomerase OS=Bos taurus GN=TPI1 PE=2 SV=3 | sp Q5E956 TPI5_BOVIN | dLGA<br>TWV<br>VLG<br>HSER | 95% | 71.6 | 53.42774 | Ref | -0.099 | 0.032 | -0.19 | -0.089 | 0.036 | 0.11  | -0.24 | 2320 | 1850 | 2200 | 2120 | 2510 | 2390 | 2610 | 2040 | 922.5 | 1843 | 2 | 0.0107 | 5.817 |
| Triosephosphate isomerase OS=Bos taurus GN=TPI1 PE=2 SV=3 | sp Q5E956 TPI5_BOVIN | dLGA<br>TWV<br>VLG<br>HSER | 95% | 51.8 | 53.48889 | Ref | 0.074  | 0.065 | -0.14 | -0.045 | -0.26 | 0.19  | -0.23 | 2280 | 2260 | 2430 | 2370 | 2790 | 2090 | 3000 | 2220 | 615.3 | 1843 | 3 | 0.0129 | 7.018 |
| Triosephosphate isomerase OS=Bos taurus GN=TPI1 PE=2 SV=3 | sp Q5E956 TPI5_BOVIN | dLGA<br>TWV<br>VLG<br>HSER | 95% | 56.7 | 53.42713 | Ref | -0.022 | -0.29 | 0.047 | -0.078 | -0.08 | 0.052 | 0.042 | 1890 | 1730 | 1570 | 2220 | 2240 | 1950 | 2230 | 2200 | 615.3 | 1843 | 3 | 0.0098 | 5.326 |
| Triosephosphate isomerase OS=Bos taurus GN=TPI1 PE=2 SV=3 | sp Q5E956 TPI5_BOVIN | dLGA<br>TWV<br>VLG<br>HSER | 77% | 38.5 | 53.46799 | Ref | 0.24   | -0.32 | 0.095 | -0.21  | -0.12 | -0.06 | -0.09 | 4920 | 5040 | 3710 | 5560 | 4960 | 4610 | 5020 | 4880 | 615.3 | 1843 | 3 | 0.0084 | 4.529 |
| Triosephosphate isomerase OS=Bos taurus GN=TPI1 PE=2 SV=3 | sp Q5E956 TPI5_BOVIN | dLGA<br>TWV<br>VLG<br>HSER | 90% | 46.1 | 53.42713 | Ref | 0.14   | -0.25 | 0.029 | -0.16  | -0.17 | -0.13 | -0.27 | 1670 | 1300 | 1070 | 1460 | 1410 | 1230 | 1320 | 1180 | 615.3 | 1843 | 3 | 0.0098 | 5.326 |
| Triosephosphate isomerase OS=Bos taurus GN=TPI1 PE=2 SV=3 | sp Q5E956 TPI5_BOVIN | dLGA<br>TWV<br>VLG<br>HSER | 60% | 34.6 | 53.45207 | Ref | 0.14   | 0.17  | -0.4  | -0.26  | -0.11 | -0.05 | 0.11  | 289  | 295  | 327  | 247  | 300  | 291  | 318  | 351  | 615.3 | 1843 | 3 | 0.0093 | 5.017 |

|                                                           |                      |                     |     |      |          |     |       |       |       |        |       |       |       |      |      |      |      |       |      |      |      |       |        |   |        |       |
|-----------------------------------------------------------|----------------------|---------------------|-----|------|----------|-----|-------|-------|-------|--------|-------|-------|-------|------|------|------|------|-------|------|------|------|-------|--------|---|--------|-------|
| Triosephosphate isomerase OS=Bos taurus GN=TPI1 PE=2 SV=3 | sp Q5E956 TPIS_BOVIN | dLGA TWV VLG HSER   | 60% | 34.6 | 53.44286 | Ref | -0.31 | 0.18  | -0.03 | -0.2   | -0.01 | -0.09 | -0.14 | 382  | 243  | 370  | 359  | 352   | 351  | 346  | 331  | 615.3 | 1843   | 3 | 0.0058 | 3.13  |
| Triosephosphate isomerase OS=Bos taurus GN=TPI1 PE=2 SV=3 | sp Q5E956 TPIS_BOVIN | iiYG GSVT GATc k    | 95% | 53.3 | 53.77747 | Ref | 0.12  | -0    | -0.06 | -0.07  | -0.13 | -0.05 | -0.18 | 9080 | 8830 | 8830 | 9520 | 10400 | 8730 | 9640 | 8720 | 642   | 1923   | 3 | 0.0165 | 8.556 |
| Triosephosphate isomerase OS=Bos taurus GN=TPI1 PE=2 SV=3 | sp Q5E956 TPIS_BOVIN | iiYG GSVT GATc k    | 95% | 55.4 | 53.7897  | Ref | 0.11  | 0.012 | 0.027 | -0.18  | -0.11 | 0.099 | -0.31 | 4260 | 4270 | 4330 | 4910 | 4690  | 4300 | 5180 | 3870 | 962.5 | 1923   | 2 | 0.0151 | 7.856 |
| Triosephosphate isomerase OS=Bos taurus GN=TPI1 PE=2 SV=3 | sp Q5E956 TPIS_BOVIN | kNNL GELI NTL NAA k | 90% | 39.2 | 49.18329 | Ref | 0.041 | -0.01 | -0.07 | -0.077 | -0.38 | 0.052 | -0.16 | 1430 | 1160 | 1210 | 1310 | 1430  | 1010 | 1430 | 1220 | 632.1 | 2524.5 | 4 | 0.0033 | 1.312 |
| Triosephosphate isomerase OS=Bos taurus GN=TPI1 PE=2 SV=3 | sp Q5E956 TPIS_BOVIN | nNL GELI NTL NAA k  | 94% | 51   | 52.79206 | Ref | 0.13  | -0.01 | 3E-04 | -0.056 | -0.15 | -0.18 | -0.28 | 3730 | 3330 | 3280 | 3700 | 3920  | 3210 | 3280 | 3030 | 698.4 | 2092.2 | 3 | 0.0139 | 6.638 |
| Triosephosphate isomerase OS=Bos taurus GN=TPI1 PE=2 SV=3 | sp Q5E956 TPIS_BOVIN | sNVS DAV AQS AR     | 89% | 41.6 | 52.19731 | Ref | 0.072 | 0.093 | -0.35 | -0.051 | -0.05 | -0.1  | -0.28 | 5650 | 4530 | 4990 | 4130 | 5590  | 4870 | 4930 | 4330 | 754.9 | 1507.8 | 2 | 0.0117 | 7.751 |

|                                                           |                      |                        |     |      |          |     |        |       |       |        |       |                            |       |       |       |       |       |       |       |                            |       |       |        |   |        |       |
|-----------------------------------------------------------|----------------------|------------------------|-----|------|----------|-----|--------|-------|-------|--------|-------|----------------------------|-------|-------|-------|-------|-------|-------|-------|----------------------------|-------|-------|--------|---|--------|-------|
| Triosephosphate isomerase OS=Bos taurus GN=TPI1 PE=2 SV=3 | sp Q5E956 TPIS_BOVIN | sNVS DAV AQS AR        | 81% | 37.6 | 52.02687 | Ref | 0.076  | 0.1   | -0.13 | -0.089 | -0.28 | 0.03                       | -0.22 | 30300 | 26600 | 29400 | 28000 | 31800 | 24400 | 31500                      | 26400 | 754.9 | 1507.8 | 2 | 0.0141 | 9.368 |
| Triosephosphate isomerase OS=Bos taurus GN=TPI1 PE=2 SV=3 | sp Q5E956 TPIS_BOVIN | sNVS DAV AQS AR        | 74% | 35.7 | 52.19731 | Ref | 0.11   | 0.025 | -0.19 | -0.093 | -0.1  | 0.036                      | -0.12 | 6520  | 6550  | 6690  | 6470  | 7630  | 6650  | 7610                       | 6800  | 754.9 | 1507.8 | 2 | 0.0117 | 7.751 |
| Triosephosphate isomerase OS=Bos taurus GN=TPI1 PE=2 SV=3 | sp Q5E956 TPIS_BOVIN | tATP QQA QEV HEK       | 95% | 60   | 54.1061  | Ref | -0.016 | 0.42  | -0.17 | -0.19  | -0.28 | 0.061                      | -0.36 | 22600 | 19600 | 28900 | 21400 | 23300 | 19100 | 25300                      | 18800 | 692.4 | 2074.1 | 3 | 0.0174 | 8.401 |
| Triosephosphate isomerase OS=Bos taurus GN=TPI1 PE=2 SV=3 | sp Q5E956 TPIS_BOVIN | vAH ALAE GLG VIAcl GEK | 95% | 51   | 53.84876 | Ref | 0.21   | 0.075 | 0.16  | 0.25   | -0.5  | Value Missing (-1.8477726) | -0.04 | 244   | 195   | 193   | 230   | 269   | 140   | Value Missing (-1.8477726) | 200   | 602.1 | 2404.3 | 4 | 0.0055 | 2.277 |
| Triosephosphate isomerase OS=Bos taurus GN=TPI1 PE=2 SV=3 | sp Q5E956 TPIS_BOVIN | vAn GAF TGEI SPG MIK   | 95% | 75.2 | 54.36276 | Ref | -0.067 | -0.01 | -0.12 | -0.094 | -0.11 | 0.054                      | -0.09 | 29500 | 24000 | 27200 | 28200 | 31700 | 27300 | 32000                      | 28800 | 734.4 | 2200.2 | 3 | 0.0261 | 11.84 |
| Triosephosphate isomerase OS=Bos taurus GN=TPI1 PE=2 SV=3 | sp Q5E956 TPIS_BOVIN | vAn GAF TGEI SPG MIK   | 95% | 69.7 | 54.30511 | Ref | 0.0054 | -0.29 | -0.08 | 0.056  | -0.02 | -0.01                      | -0.18 | 4740  | 3890  | 3450  | 4470  | 5410  | 4480  | 4710                       | 4150  | 734.4 | 2200.2 | 3 | 0.0204 | 9.251 |

|                                                           |                      |                                  |     |      |          |     |        |       |       |        |       |       |       |       |      |      |      |       |       |      |      |       |        |   |        |       |
|-----------------------------------------------------------|----------------------|----------------------------------|-----|------|----------|-----|--------|-------|-------|--------|-------|-------|-------|-------|------|------|------|-------|-------|------|------|-------|--------|---|--------|-------|
| Triosephosphate isomerase OS=Bos taurus GN=TPI1 PE=2 SV=3 | sp Q5E956 TPIS_BOVIN | vAn<br>GAF<br>TGEI<br>SPG<br>MIK | 95% | 58.9 | 54.30511 | Ref | 0.16   | -0.21 | -0.14 | 0.069  | -0.16 | -0.05 | -0.13 | 6710  | 6430 | 5390 | 6320 | 8070  | 5990  | 6800 | 6350 | 734.4 | 2200.2 | 3 | 0.0204 | 9.251 |
| Triosephosphate isomerase OS=Bos taurus GN=TPI1 PE=2 SV=3 | sp Q5E956 TPIS_BOVIN | vAn<br>GAF<br>TGEI<br>SPG<br>MIK | 57% | 34.4 | 54.25427 | Ref | 0.066  | -0.03 | -0.13 | -0.051 | 0.088 | -0.1  | -0.12 | 790   | 792  | 804  | 842  | 980   | 942   | 863  | 847  | 1101  | 2200.2 | 2 | 0.0183 | 8.303 |
| Triosephosphate isomerase OS=Bos taurus GN=TPI1 PE=2 SV=3 | sp Q5E956 TPIS_BOVIN | vAn<br>GAF<br>TGEI<br>SPG<br>mik | 95% | 54.6 | 54.46769 | Ref | 0.036  | -0.05 | -0.19 | -0.13  | 0.015 | -0.08 | -0.17 | 10800 | 8710 | 8870 | 9060 | 10400 | 10100 | 9830 | 9200 | 739.7 | 2216.2 | 3 | 0.0188 | 8.473 |
| Triosephosphate isomerase OS=Bos taurus GN=TPI1 PE=2 SV=3 | sp Q5E956 TPIS_BOVIN | vVLA<br>YEPV<br>WAI<br>GTG<br>k  | 95% | 53.2 | 52.74162 | Ref | 0.056  | 0.2   | -0.09 | -0.036 | -0.15 | -0.36 | 0.15  | 674   | 731  | 875  | 805  | 920   | 742   | 672  | 949  | 737.8 | 2210.3 | 3 | 0.0269 | 12.14 |
| Triosephosphate isomerase OS=Bos taurus GN=TPI1 PE=2 SV=3 | sp Q5E956 TPIS_BOVIN | vVLA<br>YEPV<br>WAI<br>GTG<br>k  | 95% | 56.9 | 52.48299 | Ref | 0.039  | -0.11 | -0.08 | -0.16  | 0.034 | 0.017 | -0.14 | 2270  | 2040 | 2000 | 2290 | 2390  | 2390  | 2460 | 2200 | 737.8 | 2210.3 | 3 | 0.0204 | 9.239 |
| Triosephosphate isomerase OS=Bos taurus GN=TPI1 PE=2 SV=3 | sp Q5E956 TPIS_BOVIN | vVLA<br>YEPV<br>WAI<br>GTG<br>k  | 52% | 32   | 52.28041 | Ref | -0.012 | -0.03 | -0.22 | -0.24  | -0.04 | -0.04 | -0.12 | 806   | 590  | 634  | 623  | 678   | 679   | 711  | 663  | 737.8 | 2210.3 | 3 | 0.0157 | 7.082 |

|                                                                      |                        |                  |     |      |          |     |       |       |       |        |       |      |       |      |      |      |      |      |      |      |      |       |        |   |        |       |
|----------------------------------------------------------------------|------------------------|------------------|-----|------|----------|-----|-------|-------|-------|--------|-------|------|-------|------|------|------|------|------|------|------|------|-------|--------|---|--------|-------|
| Triosephosphate isomerase OS=Bos taurus GN=TP11 PE=2 SV=3            | sp Q5E956 TPIS_BOVIN   | vVLAyEPVWAI GTGk | 52% | 28.1 | 50.17459 | Ref | -0.16 | -0.01 | -0.11 | -0.16  | -0.19 | 0.14 | 0.061 | 1100 | 858  | 1030 | 1080 | 1150 | 983  | 1290 | 1210 | 629.6 | 2514.5 | 4 | 0.0087 | 3.442 |
| Elongation factor 1-alpha OS=Canis familiaris GN=LOC476546 PE=3 SV=1 | tr E2RGE2 E2RGE2_CANFA | eHAL LAYT LGVk   | 66% | 32   | 51.68934 | Ref | 0.47  | -0.19 | -0.05 | -0.14  | -0.46 | 0.17 | -0.28 | 1070 | 1140 | 785  | 968  | 1000 | 703  | 1130 | 823  | 481.5 | 1922.1 | 4 | 0.0189 | 9.837 |
| Elongation factor 1-alpha OS=Canis familiaris GN=LOC476546 PE=3 SV=1 | tr E2RGE2 E2RGE2_CANFA | eHAL LAYT LGVk   | 85% | 38.4 | 51.59354 | Ref | 0.61  | -0.49 | 0.073 | -0.3   | -0.47 | 0.26 | -0.29 | 4950 | 6010 | 3040 | 5030 | 4280 | 3310 | 5760 | 3910 | 481.5 | 1922.1 | 4 | 0.015  | 7.798 |
| Elongation factor 1-alpha OS=Canis familiaris GN=LOC476546 PE=3 SV=1 | tr E2RGE2 E2RGE2_CANFA | eHAL LAYT LGVk   | 95% | 52.2 | 51.60246 | Ref | 0.4   | -0.2  | 0.029 | -0.049 | -0.35 | 0.19 | -0.26 | 3150 | 3620 | 2590 | 3400 | 3560 | 2520 | 3830 | 2780 | 641.7 | 1922.1 | 3 | 0.0137 | 7.14  |
| Elongation factor 1-alpha OS=Canis familiaris GN=LOC476546 PE=3 SV=1 | tr E2RGE2 E2RGE2_CANFA | eHAL LAYT LGVk   | 95% | 60.5 | 51.57967 | Ref | 0.46  | -0.33 | -0.06 | -0.052 | -0.33 | 0.34 | -0.31 | 1080 | 1320 | 828  | 1130 | 1250 | 899  | 1490 | 945  | 962.1 | 1922.1 | 2 | 0.0144 | 7.48  |

|                                                                            |                        |                |     |      |          |     |      |       |       |       |       |       |       |       |        |       |        |       |       |       |       |       |        |   |        |       |
|----------------------------------------------------------------------------|------------------------|----------------|-----|------|----------|-----|------|-------|-------|-------|-------|-------|-------|-------|--------|-------|--------|-------|-------|-------|-------|-------|--------|---|--------|-------|
| Elongation factor 1-alpha OS=Canis familiaris<br>GN=LOC476546<br>PE=3 SV=1 | tr E2RGE2 E2RGE2_CANFA | eHAL LAYT LGVk | 90% | 43.8 | 51.17043 | Ref | 0.42 | -0.06 | 0.021 | 0.037 | -0.62 | 0.29  | -0.36 | 4160  | 5080   | 3950  | 4700   | 5230  | 2900  | 5700  | 3590  | 641.7 | 1922.1 | 3 | 0.0055 | 2.85  |
| Elongation factor 1-alpha OS=Canis familiaris<br>GN=LOC476546<br>PE=3 SV=1 | tr E2RGE2 E2RGE2_CANFA | eHAL LAYT LGVk | 88% | 39.2 | 51.02018 | Ref | 0.44 | -0.07 | -0.1  | -0.15 | -0.35 | 0.13  | -0.39 | 2950  | 3020   | 2300  | 2540   | 2690  | 2050  | 2990  | 2060  | 481.5 | 1922.1 | 4 | 0.003  | 1.579 |
| Elongation factor 1-alpha OS=Canis familiaris<br>GN=LOC476546<br>PE=3 SV=1 | tr E2RGE2 E2RGE2_CANFA | eHAL LAYT LGVk | 71% | 33.4 | 51.82383 | Ref | 0.35 | -0.11 | -0.04 | -0.22 | -0.37 | 0.076 | -0.15 | 822   | 767    | 606   | 713    | 694   | 548   | 779   | 663   | 481.5 | 1922.1 | 4 | 0.0199 | 10.36 |
| Elongation factor 1-alpha OS=Canis familiaris<br>GN=LOC476546<br>PE=3 SV=1 | tr E2RGE2 E2RGE2_CANFA | iGGI GTV PVG R | 83% | 36.2 | 49.91248 | Ref | 0.54 | -0.39 | 0.12  | -0.15 | -0.21 | -0.07 | -0.14 | 95800 | 120000 | 68600 | 109000 | 99900 | 83900 | 96500 | 90900 | 665.4 | 1328.8 | 2 | 0.0116 | 8.705 |
| Elongation factor 1-alpha OS=Canis familiaris<br>GN=LOC476546<br>PE=3 SV=1 | tr E2RGE2 E2RGE2_CANFA | iGGI GTV PVG R | 79% | 35   | 50.01937 | Ref | 0.33 | -0.26 | 0.064 | -0.16 | -0.16 | 0.23  | -0.11 | 31300 | 37500  | 27000 | 37900  | 35800 | 31100 | 42600 | 33500 | 665.4 | 1328.8 | 2 | 0.0173 | 13.02 |

|                                                                            |                        |                  |     |      |          |     |      |       |       |        |       |       |       |       |       |       |       |       |       |       |       |       |        |   |        |       |
|----------------------------------------------------------------------------|------------------------|------------------|-----|------|----------|-----|------|-------|-------|--------|-------|-------|-------|-------|-------|-------|-------|-------|-------|-------|-------|-------|--------|---|--------|-------|
| Elongation factor 1-alpha OS=Canis familiaris<br>GN=LOC476546<br>PE=3 SV=1 | tr E2RGE2 E2RGE2_CANFA | IPLQ<br>DVK      | 74% | 34.2 | 50.69202 | Ref | 0.54 | -0.24 | 0.11  | -0.3   | -0.08 | -0.07 | -0.38 | 18500 | 21600 | 13700 | 19500 | 16200 | 16500 | 17400 | 13900 | 792.5 | 1582.9 | 2 | 0.0084 | 5.298 |
| Elongation factor 1-alpha OS=Canis familiaris<br>GN=LOC476546<br>PE=3 SV=1 | tr E2RGE2 E2RGE2_CANFA | qLIV<br>GVN<br>k | 89% | 38   | 48.40301 | Ref | 0.68 | -0.13 | -0.19 | -0.29  | -0.54 | -0.06 | 0.012 | 2140  | 2780  | 1720  | 1860  | 1910  | 1400  | 2040  | 2120  | 579.4 | 1156.7 | 2 | 0.0096 | 8.313 |
| Elongation factor 1-alpha OS=Canis familiaris<br>GN=LOC476546<br>PE=3 SV=1 | tr E2RGE2 E2RGE2_CANFA | qLIV<br>GVN<br>k | 89% | 37.9 | 48.36862 | Ref | 0.51 | -0.43 | -0.12 | -0.56  | -0.4  | 0.49  | -0    | 1140  | 1410  | 794   | 1100  | 900   | 874   | 1700  | 1200  | 579.4 | 1156.7 | 2 | 0.0084 | 7.259 |
| Elongation factor 1-alpha OS=Canis familiaris<br>GN=LOC476546<br>PE=3 SV=1 | tr E2RGE2 E2RGE2_CANFA | qLIV<br>GVN<br>k | 83% | 33.7 | 47.31573 | Ref | 0.57 | -0.22 | 0.024 | -0.016 | -0.44 | 0.031 | -0.22 | 17900 | 23800 | 15000 | 19900 | 21300 | 13900 | 20100 | 16800 | 740   | 1477.9 | 2 | 0.0052 | 3.528 |
| Elongation factor 1-alpha OS=Canis familiaris<br>GN=LOC476546<br>PE=3 SV=1 | tr E2RGE2 E2RGE2_CANFA | qLIV<br>GVN<br>k | 71% | 30.9 | 47.38773 | Ref | 0.31 | -0.06 | 0.023 | 0.006  | -0.08 | -0.16 | -0.13 | 4770  | 5270  | 4430  | 5270  | 5740  | 4720  | 4680  | 4720  | 493.7 | 1477.9 | 3 | 0.0059 | 3.978 |



|                                                                            |                        |                             |     |      |          |     |      |       |       |        |       |       |       |       |       |       |       |       |       |       |       |       |        |   |        |       |
|----------------------------------------------------------------------------|------------------------|-----------------------------|-----|------|----------|-----|------|-------|-------|--------|-------|-------|-------|-------|-------|-------|-------|-------|-------|-------|-------|-------|--------|---|--------|-------|
| Elongation factor 1-alpha OS=Canis familiaris<br>GN=LOC476546<br>PE=3 SV=1 | tr E2RGE2 E2RGE2_CANFA | qTVA<br>VGVI<br>k           | 73% | 31.9 | 48.52663 | Ref | 0.24 | -0.28 | -0.02 | -0.27  | -0.22 | 0.21  | 0.023 | 1180  | 1120  | 846   | 1140  | 1060  | 952   | 1340  | 1170  | 601.4 | 1200.7 | 2 | 0.0095 | 7.896 |
| Elongation factor 1-alpha OS=Canis familiaris<br>GN=LOC476546<br>PE=3 SV=1 | tr E2RGE2 E2RGE2_CANFA | qTVA<br>VGVI<br>k           | 95% | 43.6 | 48.8377  | Ref | 0.51 | -0.33 | 0.13  | -0.31  | -0.1  | -0.01 | -0.43 | 1590  | 1690  | 1020  | 1580  | 1280  | 1300  | 1450  | 1070  | 601.4 | 1200.7 | 2 | 0.0136 | 11.36 |
| Elongation factor 1-alpha OS=Canis familiaris<br>GN=LOC476546<br>PE=3 SV=1 | tr E2RGE2 E2RGE2_CANFA | qTVA<br>VGVI<br>k           | 95% | 43.7 | 48.61254 | Ref | 0.69 | -0.28 | 0.021 | -0.33  | -0.13 | -0.15 | -0.41 | 1550  | 1930  | 1070  | 1480  | 1280  | 1280  | 1320  | 1090  | 601.4 | 1200.7 | 2 | 0.0113 | 9.427 |
| Elongation factor 1-alpha OS=Canis familiaris<br>GN=LOC476546<br>PE=3 SV=1 | tr E2RGE2 E2RGE2_CANFA | qTVA<br>VGVI<br>k           | 95% | 50.4 | 47.92889 | Ref | 0.32 | -0.25 | 0.12  | -0.095 | -0.1  | 0.023 | -0.07 | 40700 | 47600 | 34700 | 50400 | 48000 | 41900 | 47500 | 44200 | 762   | 1522   | 2 | 0.0122 | 7.999 |
| Elongation factor 1-alpha OS=Canis familiaris<br>GN=LOC476546<br>PE=3 SV=1 | tr E2RGE2 E2RGE2_CANFA | tHINI<br>VVIG<br>HVn<br>SGk | 95% | 48.5 | 52.60355 | Ref | 0.36 | -0.3  | 0.037 | -0.16  | -0.14 | 0.042 | -0.08 | 13200 | 14200 | 9770  | 13800 | 13300 | 11800 | 13900 | 12700 | 550.1 | 2196.3 | 4 | 0.0226 | 10.28 |

|                                                                            |                        |                             |     |      |          |     |      |       |       |        |       |       |       |       |       |       |       |       |       |       |       |       |        |   |        |       |
|----------------------------------------------------------------------------|------------------------|-----------------------------|-----|------|----------|-----|------|-------|-------|--------|-------|-------|-------|-------|-------|-------|-------|-------|-------|-------|-------|-------|--------|---|--------|-------|
| Elongation factor 1-alpha OS=Canis familiaris<br>GN=LOC476546<br>PE=3 SV=1 | tr E2RGE2 E2RGE2_CANFA | tHINI<br>VVIG<br>HVn<br>SGk | 95% | 53.5 | 52.36031 | Ref | 0.21 | -0.02 | -0.1  | -0.087 | -0.18 | 0.19  | -0.09 | 13800 | 14400 | 13300 | 14000 | 15700 | 12800 | 17300 | 14100 | 550.1 | 2196.3 | 4 | 0.0175 | 7.951 |
| Elongation factor 1-alpha OS=Canis familiaris<br>GN=LOC476546<br>PE=3 SV=1 | tr E2RGE2 E2RGE2_CANFA | tHINI<br>VVIG<br>HVn<br>SGk | 93% | 47.4 | 52.38896 | Ref | 0.18 | -0.17 | 0.085 | -0.059 | -0.13 | 0.013 | 4E-04 | 2550  | 2600  | 2220  | 2960  | 2950  | 2450  | 2830  | 2780  | 733.1 | 2196.3 | 3 | 0.0178 | 8.103 |
| Elongation factor 1-alpha OS=Canis familiaris<br>GN=LOC476546<br>PE=3 SV=1 | tr E2RGE2 E2RGE2_CANFA | tHINI<br>VVIG<br>HVn<br>SGk | 84% | 38.5 | 52.30602 | Ref | 0.16 | -0.08 | 0.048 | -0.14  | -0.15 | 0.12  | -0.03 | 7880  | 7970  | 7320  | 8980  | 8710  | 7520  | 9520  | 8520  | 550.1 | 2196.3 | 4 | 0.015  | 6.841 |
| Elongation factor 1-alpha OS=Canis familiaris<br>GN=LOC476546<br>PE=3 SV=1 | tr E2RGE2 E2RGE2_CANFA | tHINI<br>VVIG<br>HVn<br>SGk | 95% | 53.6 | 52.09413 | Ref | 0.3  | -0.12 | 0.025 | 0.036  | -0.12 | 0.14  | -0.38 | 2400  | 2690  | 2180  | 2710  | 3010  | 2350  | 2950  | 2050  | 550.1 | 2196.3 | 4 | 0.0104 | 4.729 |
| Elongation factor 1-alpha OS=Canis familiaris<br>GN=LOC476546<br>PE=3 SV=1 | tr E2RGE2 E2RGE2_CANFA | tHINI<br>VVIG<br>HVn<br>SGk | 95% | 54.2 | 52.14682 | Ref | 0.42 | -0.19 | 0.016 | -0.1   | -0.2  | 0.023 | -0.16 | 1440  | 1670  | 1190  | 1540  | 1560  | 1270  | 1550  | 1360  | 550.1 | 2196.3 | 4 | 0.0106 | 4.838 |

|                                                                         |                        |                             |     |      |          |     |       |       |       |       |       |       |       |       |       |       |        |        |       |       |        |       |        |   |        |       |
|-------------------------------------------------------------------------|------------------------|-----------------------------|-----|------|----------|-----|-------|-------|-------|-------|-------|-------|-------|-------|-------|-------|--------|--------|-------|-------|--------|-------|--------|---|--------|-------|
| Elongation factor 1-alpha OS=Canis familiaris GN=LOC476546 PE=3 SV=1    | tr E2RGE2 E2RGE2_CANFA | yYVT<br>IIDA<br>PGH<br>R    | 84% | 39.7 | 53.07464 | Ref | 0.66  | -0.27 | 0.032 | -0.23 | -0.33 | 0.071 | -0.29 | 2230  | 3080  | 1750  | 2430   | 2240   | 1820  | 2510  | 1940   | 855   | 1707.9 | 2 | 0.014  | 8.201 |
| Uncharacterized protein (Fragment) OS=Macaca mulatta GN=AHNAK PE=4 SV=1 | tr F6S2X3 F6S2X3_MACMU | aDID<br>ISAP<br>k           | 93% | 44.1 | 51.04357 | Ref | -0.38 | -0.2  | -0.31 | -0.11 | -0.06 | -0.48 | -0.3  | 22000 | 14900 | 18300 | 19000  | 24100  | 21800 | 16900 | 19100  | 769.5 | 1536.9 | 2 | 0.0083 | 5.387 |
| Uncharacterized protein (Fragment) OS=Macaca mulatta GN=AHNAK PE=4 SV=1 | tr F6S2X3 F6S2X3_MACMU | aDID<br>VSG<br>Pk           | 93% | 44.2 | 51.98503 | Ref | -0.64 | -0.32 | -0.15 | 0.049 | 0.006 | -0.76 | -0.31 | 2E+05 | 82600 | 1E+05 | 141000 | 178000 | 2E+05 | 92800 | 126000 | 755.4 | 1508.9 | 2 | 0.0151 | 10.01 |
| Uncharacterized protein (Fragment) OS=Macaca mulatta GN=AHNAK PE=4 SV=1 | tr F6S2X3 F6S2X3_MACMU | aDLD<br>ISGP<br>k           | 89% | 41.2 | 51.56422 | Ref | -0.45 | -0.23 | -0.32 | -0.19 | 9E-04 | -0.42 | -0.23 | 18600 | 12000 | 15200 | 16000  | 19300  | 19200 | 15000 | 17000  | 762.4 | 1522.9 | 2 | 0.0102 | 6.706 |
| Uncharacterized protein (Fragment) OS=Macaca mulatta GN=AHNAK PE=4 SV=1 | tr F6S2X3 F6S2X3_MACMU | gEVD<br>VSLP<br>NVE<br>GDLk | 94% | 52   | 54.22237 | Ref | -0.34 | -0.4  | -0.29 | -0.15 | -0.07 | -0.5  | -0.26 | 7080  | 4420  | 4620  | 5580   | 6790   | 6260  | 4850  | 5680   | 727.1 | 2178.2 | 3 | 0.0112 | 5.118 |

|                                                                                  |                            |                                        |     |      |          |     |       |       |       |        |       |       |       |       |       |       |       |       |       |       |       |       |        |   |        |       |
|----------------------------------------------------------------------------------|----------------------------|----------------------------------------|-----|------|----------|-----|-------|-------|-------|--------|-------|-------|-------|-------|-------|-------|-------|-------|-------|-------|-------|-------|--------|---|--------|-------|
| Uncharacterized protein (Fragment)<br>OS=Macaca mulatta<br>GN=AHNAK PE=4<br>SV=1 | tr F6S2X3_1 F6S2X3_1 MACMU | iSMP<br>DIDL<br>NLkG<br>Pk             | 66% | 31.4 | 50.98433 | Ref | -0.8  | -0.36 | -0.15 | 0.079  | 0.007 | -0.42 | -0.15 | 13800 | 7750  | 11400 | 14800 | 19100 | 15900 | 12300 | 14800 | 614.1 | 2452.4 | 4 | 0.0072 | 2.934 |
| Uncharacterized protein (Fragment)<br>OS=Macaca mulatta<br>GN=AHNAK PE=4<br>SV=1 | tr F6S2X3_2 F6S2X3_2 MACMU | iSMP<br>DIDL<br>nLkG<br>Pk             | 55% | 30.5 | 52.07734 | Ref | -0.52 | -0.46 | -0.35 | -0.058 | 0.13  | -0.26 | -0.12 | 3520  | 2540  | 2870  | 3490  | 4700  | 4670  | 3740  | 4090  | 614.4 | 2453.4 | 4 | 0.0167 | 6.816 |
| Uncharacterized protein (Fragment)<br>OS=Macaca mulatta<br>GN=AHNAK PE=4<br>SV=1 | tr F6S2X3_3 F6S2X3_3 MACMU | vDID<br>APD<br>VDV<br>HGP<br>DWH<br>Lk | 93% | 47.8 | 55.18826 | Ref | -0.42 | -0.47 | -0.32 | -0.074 | -0.03 | -0.43 | -0.5  | 29300 | 15800 | 16500 | 20500 | 26800 | 24100 | 19100 | 18100 | 659.8 | 2635.4 | 4 | 0.0233 | 8.846 |
| Uncharacterized protein (Fragment)<br>OS=Macaca mulatta<br>GN=AHNAK PE=4<br>SV=1 | tr F6S2X3_4 F6S2X3_4 MACMU | vDID<br>TPDI<br>DIHG<br>PEGk           | 95% | 53.4 | 54.66536 | Ref | -0.81 | -0.05 | -0.31 | -0.082 | 0.082 | -0.73 | -0.27 | 30200 | 13900 | 25500 | 23900 | 30900 | 30200 | 18000 | 24500 | 777.1 | 2328.2 | 3 | 0.0205 | 8.799 |
| Uncharacterized protein (Fragment)<br>OS=Macaca mulatta<br>GN=AHNAK PE=4<br>SV=1 | tr F6S2X3_5 F6S2X3_5 MACMU | vDID<br>TPDI<br>DIHG<br>PEGk           | 94% | 52.7 | 54.64451 | Ref | -0.62 | -0.22 | -0.35 | -0.15  | 0.14  | -0.63 | -0.11 | 8480  | 4880  | 6970  | 7130  | 9070  | 9650  | 5920  | 8410  | 777.1 | 2328.2 | 3 | 0.0196 | 8.4   |

|                                                                                  |                          |                                        |     |      |          |     |       |       |       |        |       |       |       |      |      |      |      |      |      |      |      |       |        |   |        |       |
|----------------------------------------------------------------------------------|--------------------------|----------------------------------------|-----|------|----------|-----|-------|-------|-------|--------|-------|-------|-------|------|------|------|------|------|------|------|------|-------|--------|---|--------|-------|
| Uncharacterized protein (Fragment)<br>OS=Macaca mulatta<br>GN=AHNAK PE=4<br>SV=1 | tr F6S2X3_1 F6S2X3_MACMU | vDID<br>TPDI<br>DIHG<br>PEGk           | 93% | 51.1 | 54.67808 | Ref | -0.76 | -0.25 | -0.34 | 0.043  | -0.03 | -0.39 | -0.22 | 6020 | 3100 | 4770 | 5020 | 7230 | 6000 | 4900 | 5450 | 777.1 | 2328.2 | 3 | 0.0185 | 7.936 |
| Uncharacterized protein (Fragment)<br>OS=Macaca mulatta<br>GN=AHNAK PE=4<br>SV=1 | tr F6S2X3_2 F6S2X3_MACMU | vDID<br>TPDI<br>DIHG<br>PEGk           | 95% | 53.1 | 54.68169 | Ref | -0.63 | -0.14 | -0.29 | -0.15  | 0.15  | -0.62 | -0.18 | 3710 | 2220 | 3380 | 3420 | 4150 | 4480 | 2740 | 3670 | 777.1 | 2328.2 | 3 | 0.0145 | 6.21  |
| Uncharacterized protein (Fragment)<br>OS=Macaca mulatta<br>GN=AHNAK PE=4<br>SV=1 | tr F6S2X3_3 F6S2X3_MACMU | vDID<br>VPD<br>VDV<br>QGP<br>DWH<br>Lk | 95% | 62.3 | 55.13693 | Ref | -0.57 | -0.32 | -0.18 | -0.044 | -0    | -0.81 | -0.15 | 5840 | 3260 | 4200 | 5200 | 6290 | 5660 | 3380 | 5300 | 885.8 | 2654.4 | 3 | 0.0237 | 8.941 |
| Uncharacterized protein (Fragment)<br>OS=Macaca mulatta<br>GN=AHNAK PE=4<br>SV=1 | tr F6S2X3_4 F6S2X3_MACMU | vDID<br>VPD<br>VDV<br>QGP<br>DWH<br>Lk | 95% | 62.4 | 55.13592 | Ref | -0.63 | -0.5  | -0.15 | -0.044 | 0.058 | -0.67 | -0.05 | 3090 | 1730 | 2060 | 2950 | 3500 | 3270 | 2060 | 3150 | 885.8 | 2654.4 | 3 | 0.016  | 6.038 |
| Uncharacterized protein (Fragment)<br>OS=Macaca mulatta<br>GN=AHNAK PE=4<br>SV=1 | tr F6S2X3_5 F6S2X3_MACMU | vDIE<br>GPD<br>VNIE<br>GPD<br>Gk       | 95% | 59.2 | 54.45906 | Ref | -0.33 | -0.1  | -0.41 | -0.088 | -0.02 | -0.38 | -0.5  | 5900 | 4190 | 5330 | 4840 | 6670 | 6120 | 4960 | 4540 | 754.7 | 2261.2 | 3 | 0.0234 | 10.36 |

|                                                                                  |                            |                                        |     |      |          |     |       |       |       |       |       |       |       |       |       |       |       |       |       |       |       |       |        |   |        |       |
|----------------------------------------------------------------------------------|----------------------------|----------------------------------------|-----|------|----------|-----|-------|-------|-------|-------|-------|-------|-------|-------|-------|-------|-------|-------|-------|-------|-------|-------|--------|---|--------|-------|
| Uncharacterized protein (Fragment)<br>OS=Macaca mulatta<br>GN=AHNAK PE=4<br>SV=1 | tr F6S2X3_1 F6S2X3_1 MACMU | vDIE<br>GPD<br>VNIE<br>GPD<br>Gk       | 95% | 63.1 | 54.52889 | Ref | -0.45 | -0.25 | -0.13 | -0.25 | 0.09  | -0.72 | -0.27 | 35500 | 22100 | 27500 | 33500 | 34000 | 37500 | 22400 | 30300 | 754.7 | 2261.2 | 3 | 0.0155 | 6.869 |
| Uncharacterized protein (Fragment)<br>OS=Macaca mulatta<br>GN=AHNAK PE=4<br>SV=1 | tr F6S2X3_2 F6S2X3_2 MACMU | vDV<br>DVP<br>DVD<br>VQG<br>PDW<br>Hlk | 84% | 43.3 | 55.07481 | Ref | -0.47 | -0.35 | -0.2  | -0.18 | -0.15 | -0.52 | -0.03 | 8540  | 5260  | 6190  | 7710  | 8640  | 7690  | 6210  | 8680  | 881.1 | 2640.4 | 3 | 0.009  | 3.416 |
| Uncharacterized protein (Fragment)<br>OS=Macaca mulatta<br>GN=AHNAK PE=4<br>SV=1 | tr F6S2X3_3 F6S2X3_3 MACMU | vDV<br>DVP<br>DVD<br>VqG<br>PDW<br>Hlk | 93% | 50.7 | 55.0189  | Ref | -0.19 | -0.31 | -0.33 | -0.33 | -0.29 | -0.34 | -0.12 | 2420  | 1760  | 1750  | 1950  | 2140  | 1930  | 1940  | 2250  | 881.5 | 2641.4 | 3 | 0.0154 | 5.814 |
| Uncharacterized protein (Fragment)<br>OS=Macaca mulatta<br>GN=AHNAK PE=4<br>SV=1 | tr F6S2X3_4 F6S2X3_4 MACMU | vDVS<br>VPD<br>VSIE<br>GPE<br>Gk       | 90% | 46.3 | 54.3183  | Ref | -0.19 | -0.04 | -0.51 | -0.22 | -0.44 | -0.26 | -0.46 | 14800 | 9850  | 11800 | 9560  | 12900 | 9650  | 11500 | 9880  | 745.7 | 2234.2 | 3 | 0.0202 | 9.035 |
| Uncharacterized protein (Fragment)<br>OS=Macaca mulatta<br>GN=AHNAK PE=4<br>SV=1 | tr F6S2X3_5 F6S2X3_5 MACMU | vDVS<br>VPD<br>VSIE<br>GPE<br>Gk       | 89% | 46   | 54.3058  | Ref | -0.21 | -0.2  | -0.32 | -0.16 | -0.08 | -0.5  | -0.26 | 7730  | 6220  | 6810  | 7060  | 8690  | 7980  | 6250  | 7340  | 745.7 | 2234.2 | 3 | 0.0171 | 7.639 |

|                                                                                  |                                       |                          |     |      |          |     |        |       |       |        |       |       |       |       |       |       |       |       |       |       |       |       |        |   |        |       |
|----------------------------------------------------------------------------------|---------------------------------------|--------------------------|-----|------|----------|-----|--------|-------|-------|--------|-------|-------|-------|-------|-------|-------|-------|-------|-------|-------|-------|-------|--------|---|--------|-------|
| Uncharacterized protein (Fragment)<br>OS=Macaca mulatta<br>GN=AHNAK PE=4<br>SV=1 | tr F6S2X3 F6S2X3_MACMU                | vSAP<br>GVQ<br>GDV<br>k  | 95% | 59.2 | 52.09539 | Ref | -0.55  | -0.24 | -0.22 | -0.035 | -0.05 | -0.41 | -0.35 | 31000 | 18700 | 25200 | 28800 | 36000 | 31100 | 25300 | 26300 | 833   | 1664   | 2 | 0.0146 | 8.786 |
| Calreticulin OS=Bos taurus GN=CALR PE=1 SV=2                                     | sp P52193 CALR_BOVIN, tr A5D7J6_BOVIN | eQFL<br>DGD<br>GWT<br>ER | 95% | 50.6 | 51.62511 | Ref | 0.11   | -0.08 | 0.059 | -0.15  | -0.09 | -0.1  | -0.16 | 10600 | 9310  | 8910  | 11000 | 10500 | 9520  | 9880  | 9410  | 878.9 | 1755.8 | 2 | 0.0157 | 8.95  |
| Calreticulin OS=Bos taurus GN=CALR PE=1 SV=2                                     | sp P52193 CALR_BOVIN, tr A5D7J6_BOVIN | eQFL<br>DGD<br>GWT<br>ER | 92% | 46.6 | 51.66913 | Ref | -0.12  | -0.04 | -0.32 | -0.011 | -0.34 | 0.018 | 0.27  | 7360  | 5320  | 6090  | 5650  | 7700  | 5360  | 7160  | 8460  | 586.3 | 1755.8 | 3 | 0.0145 | 8.254 |
| Calreticulin OS=Bos taurus GN=CALR PE=1 SV=2                                     | sp P52193 CALR_BOVIN, tr A5D7J6_BOVIN | eQFL<br>DGD<br>GWT<br>ER | 80% | 37.1 | 51.66951 | Ref | 0.045  | -0.26 | -0.05 | 0.043  | 0.081 | -0.09 | -0.03 | 11100 | 10400 | 9130  | 11800 | 13900 | 12500 | 11500 | 11900 | 878.9 | 1755.8 | 2 | 0.014  | 7.971 |
| Calreticulin OS=Bos taurus GN=CALR PE=1 SV=2                                     | sp P52193 CALR_BOVIN, tr A5D7J6_BOVIN | eQFL<br>DGD<br>GWT<br>ER | 87% | 40   | 51.71341 | Ref | 0.12   | -0.07 | -0.02 | 0.031  | -0.11 | -0.08 | -0.13 | 20600 | 20100 | 19100 | 22100 | 25300 | 20000 | 21400 | 20400 | 878.9 | 1755.8 | 2 | 0.0129 | 7.357 |
| Calreticulin OS=Bos taurus GN=CALR PE=1 SV=2                                     | sp P52193 CALR_BOVIN, tr A5D7J6_BOVIN | eQFL<br>DGD<br>GWT<br>ER | 59% | 32.3 | 51.76685 | Ref | 0.068  | -0.08 | -0.02 | -0.058 | -0    | 0.01  | -0.17 | 4650  | 4390  | 4290  | 5040  | 5400  | 4890  | 5160  | 4520  | 878.9 | 1755.8 | 2 | 0.0119 | 6.799 |
| Calreticulin OS=Bos taurus GN=CALR PE=1 SV=2                                     | sp P52193 CALR_BOVIN, tr A5D7J6_BOVIN | eQFL<br>DGD<br>GWT<br>ER | 77% | 36.9 | 51.7942  | Ref | -0.048 | -0.05 | -0.29 | -0.042 | -0.33 | 0.091 | 0.046 | 8610  | 6090  | 6600  | 6280  | 8210  | 5870  | 8210  | 7900  | 586.3 | 1755.8 | 3 | 0.0118 | 6.7   |

|                                              |                                              |                 |     |      |          |     |       |       |       |        |       |       |       |       |       |       |       |       |       |       |       |       |        |   |        |       |
|----------------------------------------------|----------------------------------------------|-----------------|-----|------|----------|-----|-------|-------|-------|--------|-------|-------|-------|-------|-------|-------|-------|-------|-------|-------|-------|-------|--------|---|--------|-------|
| Calreticulin OS=Bos taurus GN=CALR PE=1 SV=2 | sp P52193 CALR_BOVIN, tr A5D7J6 A5D7J6_BOVIN | eQFL DGD GWT ER | 78% | 36.5 | 51.82794 | Ref | 0.11  | -0.05 | 0.096 | -0.09  | -0.1  | -0.06 | -0.26 | 3260  | 3010  | 2920  | 3630  | 3510  | 3040  | 3280  | 2840  | 878.9 | 1755.8 | 2 | 0.0105 | 5.956 |
| Calreticulin OS=Bos taurus GN=CALR PE=1 SV=2 | sp P52193 CALR_BOVIN, tr A5D7J6 A5D7J6_BOVIN | eQFL DGD GWT ER | 79% | 37.1 | 51.97316 | Ref | 0.036 | -0.1  | 0.031 | -0.06  | 0.035 | -0.19 | -0.25 | 25000 | 20000 | 19700 | 24200 | 25100 | 23400 | 20900 | 19900 | 878.9 | 1755.8 | 2 | 0.005  | 2.837 |
| Calreticulin OS=Bos taurus GN=CALR PE=1 SV=2 | sp P52193 CALR_BOVIN, tr A5D7J6 A5D7J6_BOVIN | gQTL VVQ FTVK   | 87% | 40.9 | 50.93257 | Ref | 0.059 | -0.09 | -0.09 | 0.16   | -0.22 | -0.12 | -0.02 | 15500 | 14000 | 13700 | 15400 | 20100 | 13500 | 15200 | 16100 | 610   | 1827.1 | 3 | 0.0243 | 13.28 |
| Calreticulin OS=Bos taurus GN=CALR PE=1 SV=2 | sp P52193 CALR_BOVIN, tr A5D7J6 A5D7J6_BOVIN | gQTL VVQ FTVK   | 85% | 38.7 | 50.19444 | Ref | 0.14  | 0.033 | 0.11  | 0.016  | -0.27 | -0.11 | -0.27 | 12100 | 11600 | 11700 | 13900 | 14300 | 10300 | 12000 | 10600 | 610   | 1827.1 | 3 | 0.0124 | 6.779 |
| Calreticulin OS=Bos taurus GN=CALR PE=1 SV=2 | sp P52193 CALR_BOVIN, tr A5D7J6 A5D7J6_BOVIN | gQTL VVQ FTVK   | 78% | 35.6 | 50.08307 | Ref | 0.14  | -0.06 | -0.09 | 0.045  | -0.12 | -0.12 | 0.002 | 10500 | 11000 | 10400 | 11400 | 13700 | 10700 | 11200 | 12100 | 610   | 1827.1 | 3 | 0.0091 | 4.974 |
| Calreticulin OS=Bos taurus GN=CALR PE=1 SV=2 | sp P52193 CALR_BOVIN, tr A5D7J6 A5D7J6_BOVIN | gQTL VVQ FTVK   | 95% | 65.6 | 50.0552  | Ref | 0.14  | -0.14 | 0.058 | -0.071 | -0.09 | -0.1  | -0.21 | 3850  | 3470  | 3110  | 3990  | 4030  | 3470  | 3610  | 3310  | 914.6 | 1827.1 | 2 | 0.0078 | 4.265 |
| Calreticulin OS=Bos taurus GN=CALR PE=1 SV=2 | sp P52193 CALR_BOVIN, tr A5D7J6 A5D7J6_BOVIN | gQTL VVQ FTVK   | 95% | 74   | 50.54356 | Ref | 0.03  | -0.13 | 0.12  | 0.018  | -0.09 | -0.06 | -0.17 | 8240  | 7510  | 7290  | 9740  | 10000 | 8100  | 8660  | 7960  | 914.6 | 1827.1 | 2 | 0.0162 | 8.87  |



|                                              |                                              |                   |     |      |          |     |        |       |       |        |       |       |       |       |        |       |        |        |       |       |        |       |        |   |        |       |
|----------------------------------------------|----------------------------------------------|-------------------|-----|------|----------|-----|--------|-------|-------|--------|-------|-------|-------|-------|--------|-------|--------|--------|-------|-------|--------|-------|--------|---|--------|-------|
| Calreticulin OS=Bos taurus GN=CALR PE=1 SV=2 | sp P52193 CALR_BOVIN, tr A5D7J6 A5D7J6_BOVIN | gQTL VVQ FTVk     | 63% | 31.7 | 50.0512  | Ref | -0.075 | -0.23 | 0.13  | 0.12   | -0.09 | 0.084 | 0.059 | 8600  | 9080   | 8820  | 12700  | 14000  | 10500 | 12400 | 12100  | 610   | 1827.1 | 3 | 0.0067 | 3.661 |
| Calreticulin OS=Bos taurus GN=CALR PE=1 SV=2 | sp P52193 CALR_BOVIN, tr A5D7J6 A5D7J6_BOVIN | gQTL VVQ FTVk     | 88% | 40.6 | 50.08302 | Ref | 0.15   | -0    | -0.04 | 0.065  | -0.32 | -0.13 | -0.04 | 2190  | 2140   | 2090  | 2280   | 2710   | 1810  | 2160  | 2280   | 610   | 1827.1 | 3 | 0.0095 | 5.17  |
| Calreticulin OS=Bos taurus GN=CALR PE=1 SV=2 | sp P52193 CALR_BOVIN, tr A5D7J6 A5D7J6_BOVIN | gQTL VVQ FTVk     | 89% | 41.6 | 50.07031 | Ref | 0.095  | -0.09 | -0.04 | 0.29   | -0.27 | -0.12 | -0.24 | 1830  | 1690   | 1610  | 1880   | 2610   | 1540  | 1780  | 1630   | 610   | 1827.1 | 3 | 0.0087 | 4.76  |
| Calreticulin OS=Bos taurus GN=CALR PE=1 SV=2 | sp P52193 CALR_BOVIN, tr A5D7J6 A5D7J6_BOVIN | hEQ NIDc GGG YVvk | 95% | 51.1 | 52.3148  | Ref | 0.28   | 0.02  | -0.02 | -0.084 | -0.01 | -0.28 | -0.21 | 30200 | 33300  | 30100 | 32800  | 34600  | 31800 | 27600 | 28600  | 692   | 2073   | 3 | 0.0184 | 8.885 |
| Calreticulin OS=Bos taurus GN=CALR PE=1 SV=2 | sp P52193 CALR_BOVIN, tr A5D7J6 A5D7J6_BOVIN | hEQ NIDc GGG YVvk | 95% | 59.1 | 52.15357 | Ref | -0.039 | -0.24 | 0.17  | -0.015 | -0.05 | -0.02 | -0.17 | 3170  | 2620   | 2460  | 3690   | 3570   | 3040  | 3260  | 2910   | 1038  | 2073   | 2 | 0.0229 | 11.05 |
| Calreticulin OS=Bos taurus GN=CALR PE=1 SV=2 | sp P52193 CALR_BOVIN, tr A5D7J6 A5D7J6_BOVIN | hEQ NIDc GGG YVvk | 89% | 43.5 | 52.29836 | Ref | 0.1    | 0.15  | -0    | -0.14  | -0.09 | -0.19 | -0.12 | 9740  | 9330   | 10400 | 10600  | 10600  | 9600  | 9300  | 9740   | 692   | 2073   | 3 | 0.0193 | 9.319 |
| Calreticulin OS=Bos taurus GN=CALR PE=1 SV=2 | sp P52193 CALR_BOVIN, tr A5D7J6 A5D7J6_BOVIN | kVH VIFN Yk       | 56% | 27.4 | 48.9161  | Ref | 0.081  | -0.2  | 0.098 | -0.068 | -0.03 | 0.015 | -0.2  | 2E+05 | 180000 | 2E+05 | 222000 | 218000 | 2E+05 | 2E+05 | 180000 | 515.8 | 2059.3 | 4 | 0.0185 | 8.956 |

|                                              |                                              |                 |     |      |          |     |       |       |       |        |       |       |       |       |       |       |       |       |       |       |       |       |        |   |        |       |
|----------------------------------------------|----------------------------------------------|-----------------|-----|------|----------|-----|-------|-------|-------|--------|-------|-------|-------|-------|-------|-------|-------|-------|-------|-------|-------|-------|--------|---|--------|-------|
| Calreticulin OS=Bos taurus GN=CALR PE=1 SV=2 | sp P52193 CALR_BOVIN, tr A5D7J6 A5D7J6_BOVIN | qIDN PEyK       | 73% | 36.2 | 52.89101 | Ref | -0.11 | 0.01  | 0.083 | -0.086 | 0.034 | -0.22 | -0.19 | 82400 | 60100 | 70700 | 83500 | 81900 | 77700 | 67900 | 69100 | 807.9 | 1613.9 | 2 | 0.013  | 8.072 |
| Calreticulin OS=Bos taurus GN=CALR PE=1 SV=2 | sp P52193 CALR_BOVIN, tr A5D7J6 A5D7J6_BOVIN | vHVI FNYK       | 75% | 35.5 | 50.85983 | Ref | 0.12  | -0.13 | 0.12  | -0.1   | -0.18 | -0    | -0.15 | 16800 | 15800 | 14400 | 19300 | 18200 | 15100 | 17800 | 15900 | 543.3 | 1627   | 3 | 0.0037 | 2.279 |
| Calreticulin OS=Bos taurus GN=CALR PE=1 SV=2 | sp P52193 CALR_BOVIN, tr A5D7J6 A5D7J6_BOVIN | vHVI FNYK       | 83% | 37.8 | 51.28567 | Ref | 0.063 | -0    | 0.16  | -0.12  | -0.14 | 0.014 | -0.24 | 3410  | 3230  | 3340  | 4200  | 3810  | 3280  | 3820  | 3180  | 814.5 | 1627   | 2 | 0.0125 | 7.706 |
| Calreticulin OS=Bos taurus GN=CALR PE=1 SV=2 | sp P52193 CALR_BOVIN, tr A5D7J6 A5D7J6_BOVIN | vHVI FNYK       | 92% | 43.6 | 51.48251 | Ref | 0.12  | -0.22 | 0.015 | -0.027 | -0.13 | 0.012 | -0.11 | 1820  | 1690  | 1450  | 1910  | 2050  | 1670  | 1920  | 1750  | 814.5 | 1627   | 2 | 0.0172 | 10.56 |
| Calreticulin OS=Bos taurus GN=CALR PE=1 SV=2 | sp P52193 CALR_BOVIN, tr A5D7J6 A5D7J6_BOVIN | vHVI FNYK       | 54% | 30.6 | 50.57955 | Ref | -0.1  | -0.33 | -0    | -0.096 | 0.11  | -0.11 | 0.029 | 839   | 609   | 565   | 796   | 822   | 829   | 741   | 811   | 543.3 | 1627   | 3 | #####  | 0.3   |
| ALB protein OS=Bos taurus GN=ALB PE=2 SV=1   | tr B0JYQ0 B0JYQ0_BOVIN                       | eTYG DMA DccA k | 53% | 23.8 | 43.94522 | Ref | 1.3   | 0.79  | 1.1   | 0.93   | 0.73  | 1.3   | 0.84  | 3740  | 5120  | 4030  | 5450  | 5500  | 4170  | 6320  | 4680  | 669.6 | 2005.8 | 3 | 0.0189 | 9.419 |
| ALB protein OS=Bos taurus GN=ALB PE=2 SV=1   | tr B0JYQ0 B0JYQ0_BOVIN                       | eTYG DMA DccA k | 88% | 32.5 | 44.03258 | Ref | 1.2   | 0.54  | 1.3   | 0.93   | 0.8   | 1.5   | 0.89  | 4810  | 11300 | 7770  | 15200 | 12700 | 10100 | 17200 | 11200 | 1004  | 2005.8 | 2 | 0.0171 | 8.504 |

|                                                  |                                |                           |     |      |          |     |      |      |      |      |      |     |      |      |       |       |       |       |       |       |       |       |        |   |        |       |
|--------------------------------------------------|--------------------------------|---------------------------|-----|------|----------|-----|------|------|------|------|------|-----|------|------|-------|-------|-------|-------|-------|-------|-------|-------|--------|---|--------|-------|
| ALB protein OS=Bos<br>taurus GN=ALB<br>PE=2 SV=1 | tr BOJYQO<br> BOJYQO_<br>BOVIN | eTYG<br>DMA<br>DccA<br>k  | 65% | 25.8 | 44.11081 | Ref | 1.5  | 0.47 | 1.2  | 1.1  | 0.71 | 1.3 | 0.77 | 5270 | 11800 | 6270  | 11500 | 11900 | 7980  | 12300 | 8610  | 1004  | 2005.8 | 2 | 0.016  | 7.956 |
| ALB protein OS=Bos<br>taurus GN=ALB<br>PE=2 SV=1 | tr BOJYQO<br> BOJYQO_<br>BOVIN | eTYG<br>DMA<br>DccA<br>k  | 95% | 52.3 | 44.16973 | Ref | 1.5  | 0.6  | 1.3  | 0.97 | 0.83 | 1.4 | 0.67 | 8200 | 30800 | 17500 | 32100 | 28100 | 22300 | 33900 | 20700 | 669.6 | 2005.8 | 3 | 0.0156 | 7.774 |
| ALB protein OS=Bos<br>taurus GN=ALB<br>PE=2 SV=1 | tr BOJYQO<br> BOJYQO_<br>BOVIN | eTYG<br>DMA<br>DccA<br>k  | 50% | 23.3 | 43.94522 | Ref | 1.1  | 1    | 0.96 | 0.87 | 0.82 | 1.4 | 0.79 | 6550 | 8210  | 8410  | 9120  | 9470  | 7990  | 12200 | 8100  | 669.6 | 2005.8 | 3 | 0.0189 | 9.419 |
| ALB protein OS=Bos<br>taurus GN=ALB<br>PE=2 SV=1 | tr BOJYQO<br> BOJYQO_<br>BOVIN | IGFY<br>GFQ<br>NELI<br>VR | 89% | 44.6 | 53.45001 | Ref | 0.98 | 0.74 | 0.86 | 0.94 | 1.1  | 1   | 1.2  | 8220 | 8230  | 7600  | 9270  | 10800 | 10200 | 10300 | 11700 | 614.7 | 1841   | 3 | 0.0027 | 1.484 |
| ALB protein OS=Bos<br>taurus GN=ALB<br>PE=2 SV=1 | tr BOJYQO<br> BOJYQO_<br>BOVIN | IGFY<br>GFQ<br>NELI<br>VR | 95% | 48.8 | 53.48095 | Ref | 1.5  | 0.46 | 1.2  | 0.92 | 0.78 | 1.5 | 0.91 | 7930 | 24500 | 13100 | 24300 | 22200 | 17600 | 29300 | 20000 | 921.5 | 1841   | 2 | 0.0018 | 0.981 |
| ALB protein OS=Bos<br>taurus GN=ALB<br>PE=2 SV=1 | tr BOJYQO<br> BOJYQO_<br>BOVIN | IGFY<br>GFQ<br>NELI<br>VR | 95% | 52.9 | 53.42257 | Ref | 1.5  | 0.55 | 1.2  | 0.86 | 0.83 | 1.4 | 0.9  | 765  | 2120  | 1210  | 2080  | 1860  | 1590  | 2490  | 1730  | 921.5 | 1841   | 2 | 0.0114 | 6.215 |
| ALB protein OS=Bos<br>taurus GN=ALB<br>PE=2 SV=1 | tr BOJYQO<br> BOJYQO_<br>BOVIN | IGFY<br>GFQ<br>NELI<br>VR | 74% | 37   | 53.45382 | Ref | 1.4  | 0.5  | 1.2  | 0.85 | 0.87 | 1.3 | 0.93 | 632  | 1490  | 836   | 1520  | 1330  | 1170  | 1670  | 1270  | 921.5 | 1841   | 2 | 0.0069 | 3.761 |

|                                            |                        |                   |     |      |          |     |                               |                               |                                |                                |                               |                               |                                |                        |                               |                               |                                |                                |                               |                               |                                |       |      |   |        |       |
|--------------------------------------------|------------------------|-------------------|-----|------|----------|-----|-------------------------------|-------------------------------|--------------------------------|--------------------------------|-------------------------------|-------------------------------|--------------------------------|------------------------|-------------------------------|-------------------------------|--------------------------------|--------------------------------|-------------------------------|-------------------------------|--------------------------------|-------|------|---|--------|-------|
| ALB protein OS=Bos taurus GN=ALB PE=2 SV=1 | tr BOJYQO BOJYQO_BOVIN | mPc AED YLSLI LNR | 84% | 40.5 | 52.50937 | Ref | 1.2                           | 0.59                          | 0.98                           | 1.2                            | 0.68                          | 1.3                           | 0.8                            | 198                    | 266                           | 184                           | 271                            | 339                            | 211                           | 347                           | 238                            | 663.3 | 1987 | 3 | 0.0114 | 5.732 |
| ALB protein OS=Bos taurus GN=ALB PE=2 SV=1 | tr BOJYQO BOJYQO_BOVIN | mPc AED YLSLI LNR | 95% | 59.5 | 52.50639 | Ref | 1.9                           | Value Missing (-0.29801834)   | 0.92                           | 0.97                           | 0.61                          | 1.2                           | 0.85                           | 142                    | 370                           | Value Missing (-0.29801834)   | 222                            | 253                            | 172                           | 276                           | 210                            | 663.3 | 1987 | 3 | 0.0116 | 5.823 |
| ALB protein OS=Bos taurus GN=ALB PE=2 SV=1 | tr BOJYQO BOJYQO_BOVIN | mPc AED YLSLI LNR | 93% | 49   | 52.71635 | Ref | 1.3                           | 0.46                          | 0.98                           | 0.88                           | 0.75                          | 1.3                           | 1.2                            | 190                    | 257                           | 160                           | 257                            | 264                            | 211                           | 315                           | 293                            | 663.3 | 1987 | 3 | 0.0055 | 2.789 |
| ALB protein OS=Bos taurus GN=ALB PE=2 SV=1 | tr BOJYQO BOJYQO_BOVIN | mPc AED YLSLI LNR | 95% | 73   | 51.97187 | Ref | Reference Missing (1.3602957) | Reference Missing (0.3364616) | Reference Missing (0.8699256)  | Reference Missing (0.8374492)  | Reference Missing (0.8517555) | Reference Missing (1.7116258) | Reference Missing (0.8637019)  | No Values (0.16747573) | Reference Missing (1.3602957) | Reference Missing (0.3364616) | Reference Missing (0.8699256)  | Reference Missing (0.8374492)  | Reference Missing (0.8517555) | Reference Missing (1.7116258) | Reference Missing (0.8637019)  | 668.7 | 2003 | 3 | 0.0129 | 6.456 |
| ALB protein OS=Bos taurus GN=ALB PE=2 SV=1 | tr BOJYQO BOJYQO_BOVIN | mPc AED YLSLI LNR | 95% | 72.4 | 51.99604 | Ref | 1.7                           | 0.34                          | 1.2                            | 0.89                           | 0.82                          | 1.6                           | 0.68                           | 370                    | 1550                          | 678                           | 1350                           | 1220                           | 1020                          | 1770                          | 961                            | 1002  | 2003 | 2 | 0.0124 | 6.199 |
| ALB protein OS=Bos taurus GN=ALB PE=2 SV=1 | tr BOJYQO BOJYQO_BOVIN | mPc AED YLSLI LNR | 95% | 70.2 | 52.00364 | Ref | Reference Missing (1.3924317) | No Values (0.4325374)         | Reference Missing (0.96123844) | Reference Missing (0.61458147) | Reference Missing (0.7273222) | Reference Missing (1.7556298) | Reference Missing (0.77350223) | No Values (0.34784085) | Reference Missing (1.3924317) | No Values (0.4325374)         | Reference Missing (0.96123844) | Reference Missing (0.61458147) | Reference Missing (0.7273222) | Reference Missing (1.7556298) | Reference Missing (0.77350223) | 668.7 | 2003 | 3 | 0.0118 | 5.902 |
| ALB protein OS=Bos taurus GN=ALB PE=2 SV=1 | tr BOJYQO BOJYQO_BOVIN | mPc AED YLSLI LNR | 90% | 42.3 | 52.02848 | Ref | 1.5                           | 0.37                          | 1.2                            | 0.99                           | 0.64                          | 1.5                           | 0.91                           | 300                    | 924                           | 474                           | 952                            | 898                            | 616                           | 1200                          | 771                            | 1002  | 2003 | 2 | 0.011  | 5.47  |

|                                            |                        |                 |     |      |          |     |                               |                      |                               |                               |                               |                               |                               |                         |                               |                                |                               |                               |                               |                               |                               |       |        |   |        |       |
|--------------------------------------------|------------------------|-----------------|-----|------|----------|-----|-------------------------------|----------------------|-------------------------------|-------------------------------|-------------------------------|-------------------------------|-------------------------------|-------------------------|-------------------------------|--------------------------------|-------------------------------|-------------------------------|-------------------------------|-------------------------------|-------------------------------|-------|--------|---|--------|-------|
| ALB protein OS=Bos taurus GN=ALB PE=2 SV=1 | tr BOJYQO BOJYQO_BOVIN | tVM ENFV AFV Gk | 95% | 56.1 | 53.55158 | Ref | 1.3                           | 0.3                  | 1                             | 0.92                          | 0.6                           | 1.4                           | 1.5                           | 11400                   | 30300                         | 16000                          | 29400                         | 30400                         | 21300                         | 38400                         | 41200                         | 650.7 | 1949.1 | 3 | 0.0158 | 8.104 |
| ALB protein OS=Bos taurus GN=ALB PE=2 SV=1 | tr BOJYQO BOJYQO_BOVIN | tVM ENFV AFV Gk | 95% | 63.9 | 53.47038 | Ref | 1.3                           | 0.41                 | 1.3                           | 1                             | 0.75                          | 1.5                           | 0.79                          | 2160                    | 5140                          | 3000                           | 6430                          | 5620                          | 4090                          | 7050                          | 4350                          | 975.6 | 1949.1 | 2 | 0.0047 | 2.43  |
| ALB protein OS=Bos taurus GN=ALB PE=2 SV=1 | tr BOJYQO BOJYQO_BOVIN | tVM ENFV AFV Gk | 95% | 73.6 | 53.67102 | Ref | 1.3                           | 0.4                  | 1.2                           | 0.87                          | 0.74                          | 1.6                           | 0.84                          | 631                     | 1610                          | 919                            | 1840                          | 1570                          | 1260                          | 2440                          | 1390                          | 975.5 | 1949.1 | 2 | 0.021  | 10.76 |
| ALB protein OS=Bos taurus GN=ALB PE=2 SV=1 | tr BOJYQO BOJYQO_BOVIN | tVM ENFV AFV Gk | 92% | 47.7 | 53.56707 | Ref | Reference Missing (1.3318381) | Missing (0.36775294) | Reference Missing (1.1719851) | Reference Missing (0.8815356) | Reference Missing (0.6959952) | Reference Missing (1.4182385) | Reference Missing (1.318014)  | No Values (-0.36153835) | Reference Missing (1.3318381) | Reference Missing (0.36775294) | Reference Missing (1.1719851) | Reference Missing (0.8815356) | Reference Missing (0.6959952) | Reference Missing (1.4182385) | Reference Missing (1.318014)  | 650.7 | 1949.1 | 3 | 0.0132 | 6.781 |
| ALB protein OS=Bos taurus GN=ALB PE=2 SV=1 | tr BOJYQO BOJYQO_BOVIN | tVM ENFV AFV Gk | 94% | 50.4 | 53.58319 | Ref | Reference Missing (1.4688914) | Missing (0.46078658) | Reference Missing (1.1742151) | Reference Missing (0.8275526) | Reference Missing (0.5245116) | Reference Missing (1.3839763) | Reference Missing (1.2986054) | No Values (-0.34859362) | Reference Missing (1.4688914) | Reference Missing (0.46078658) | Reference Missing (1.1742151) | Reference Missing (0.8275526) | Reference Missing (0.5245116) | Reference Missing (1.3839763) | Reference Missing (1.2986054) | 650.7 | 1949.1 | 3 | 0.0138 | 7.074 |
| ALB protein OS=Bos taurus GN=ALB PE=2 SV=1 | tr BOJYQO BOJYQO_BOVIN | tVM ENFV AFV Gk | 93% | 49.7 | 53.69023 | Ref | 1.3                           | 0.34                 | 1.1                           | 0.72                          | 0.79                          | 1.4                           | 1.4                           | 1010                    | 2040                          | 1130                           | 2120                          | 1820                          | 1670                          | 2590                          | 2550                          | 650.7 | 1949.1 | 3 | 0.0184 | 9.412 |
| ALB protein OS=Bos taurus GN=ALB PE=2 SV=1 | tr BOJYQO BOJYQO_BOVIN | tVM ENFV AFV Gk | 92% | 47.7 | 53.57466 | Ref | 1.3                           | 0.3                  | 1.2                           | 0.76                          | 0.64                          | 1.4                           | 1.4                           | 629                     | 1470                          | 769                            | 1600                          | 1310                          | 1050                          | 1800                          | 1870                          | 650.7 | 1949.1 | 3 | 0.0149 | 7.627 |

|                                                              |                        |                                       |     |      |          |     |       |                            |       |        |       |       |       |      |      |                            |      |      |      |      |      |       |        |   |        |       |
|--------------------------------------------------------------|------------------------|---------------------------------------|-----|------|----------|-----|-------|----------------------------|-------|--------|-------|-------|-------|------|------|----------------------------|------|------|------|------|------|-------|--------|---|--------|-------|
| ALB protein OS=Bos taurus GN=ALB PE=2 SV=1                   | tr BOJYQ0 BOJYQ0_BOVIN | tVM<br>ENFV<br>AFV<br>Gk              | 95% | 58.3 | 53.51967 | Ref | 1.2   | 0.4                        | 1.2   | 1      | 0.77  | 1.1   | 1.4   | 239  | 468  | 298                        | 593  | 557  | 416  | 552  | 675  | 650.7 | 1949.1 | 3 | 0.0105 | 5.381 |
| ALB protein OS=Bos taurus GN=ALB PE=2 SV=1                   | tr BOJYQ0 BOJYQ0_BOVIN | tVm<br>EnFV<br>AFV<br>Gk              | 84% | 41.8 | 53.73578 | Ref | 1.1   | 0.87                       | 0.88  | 0.92   | 0.85  | 1.1   | 1.1   | 5300 | 6110 | 5490                       | 6240 | 7040 | 5880 | 7270 | 7110 | 656.4 | 1966.1 | 3 | 0.0134 | 6.826 |
| Uncharacterized protein OS=Bos taurus GN=LOC787568 PE=3 SV=1 | tr F1MNF8 F1MNF8_BOVIN | aVc<br>MLS<br>NTT<br>AIAE<br>AWA<br>R | 95% | 65.7 | 53.13211 | Ref | 0.84  | Value Missing (-1.9129511) | 0.024 | -0.41  | -0.27 | -0.02 | -0.38 | 289  | 346  | Value Missing (-1.9129511) | 240  | 196  | 189  | 234  | 181  | 720   | 2157.1 | 3 | 0.0052 | 2.402 |
| Uncharacterized protein OS=Bos taurus GN=LOC787568 PE=3 SV=1 | tr F1MNF8 F1MNF8_BOVIN | aVc<br>MLS<br>NTT<br>AIAE<br>AWA<br>R | 73% | 37.1 | 53.01521 | Ref | 0.091 | Value Missing (-2.881796)  | 0.34  | -0.045 | -0.04 | 0.24  | -0.29 | 164  | 118  | Value Missing (-2.881796)  | 171  | 144  | 126  | 160  | 110  | 720   | 2157.1 | 3 | 0.0101 | 4.696 |
| Uncharacterized protein OS=Bos taurus GN=LOC787568 PE=3 SV=1 | tr F1MNF8 F1MNF8_BOVIN | aVFV<br>DLEP<br>TVID<br>EVR           | 95% | 60.1 | 53.84327 | Ref | 0.31  | 0.36                       | -0.14 | -0.29  | -0.38 | -0.01 | -0.11 | 4960 | 6980 | 7820                       | 6200 | 6180 | 5080 | 6830 | 6340 | 669.4 | 2005.1 | 3 | 0.0155 | 7.748 |
| Uncharacterized protein OS=Bos taurus GN=LOC787568 PE=3 SV=1 | tr F1MNF8 F1MNF8_BOVIN | aVFV<br>DLEP<br>TVID<br>EVR           | 95% | 49.4 | 53.71812 | Ref | 0.2   | 0.081                      | -0.16 | -0.075 | -0.25 | 0.11  | -0.28 | 2610 | 2860 | 2860                       | 2720 | 3180 | 2470 | 3290 | 2500 | 1004  | 2005.1 | 2 | 0.0016 | 0.782 |

|                                                                    |                                |                              |     |      |          |     |        |       |       |        |       |       |       |       |       |       |       |       |       |       |       |       |        |   |        |       |
|--------------------------------------------------------------------|--------------------------------|------------------------------|-----|------|----------|-----|--------|-------|-------|--------|-------|-------|-------|-------|-------|-------|-------|-------|-------|-------|-------|-------|--------|---|--------|-------|
| Uncharacterized protein OS=Bos taurus<br>GN=LOC787568<br>PE=3 SV=1 | tr F1MNF<br>8 F1MNF<br>8_BOVIN | dVN<br>AAIA<br>TIk           | 95% | 68.3 | 51.04702 | Ref | 0.11   | -0.32 | 0.054 | -0.062 | -0    | -0.07 | -0.29 | 32300 | 28700 | 23000 | 33600 | 34200 | 31100 | 31000 | 26400 | 812.5 | 1623   | 2 | 0.0168 | 10.35 |
| Uncharacterized protein OS=Bos taurus<br>GN=LOC787568<br>PE=3 SV=1 | tr F1MNF<br>8 F1MNF<br>8_BOVIN | dVN<br>AAIA<br>TIk           | 95% | 51.8 | 50.94128 | Ref | 0.19   | -0.21 | 0.082 | -0.1   | -0.11 | -0.07 | -0.29 | 66300 | 65400 | 53800 | 73800 | 71600 | 62300 | 66900 | 56700 | 542   | 1623   | 3 | 0.0114 | 7.05  |
| Uncharacterized protein OS=Bos taurus<br>GN=LOC787568<br>PE=3 SV=1 | tr F1MNF<br>8 F1MNF<br>8_BOVIN | dVn<br>AAIA<br>TIk           | 95% | 58.4 | 51.43646 | Ref | 0.23   | -0.27 | -0.05 | -0.006 | -0.08 | -0.12 | -0.18 | 15300 | 15800 | 12100 | 15900 | 18100 | 15000 | 15300 | 14500 | 813   | 1624   | 2 | 0.0072 | 4.42  |
| Uncharacterized protein OS=Bos taurus<br>GN=LOC787568<br>PE=3 SV=1 | tr F1MNF<br>8 F1MNF<br>8_BOVIN | iHFP<br>LATY<br>APVI<br>SAEK | 67% | 35.5 | 53.08163 | Ref | 0.2    | -0.26 | 0.056 | -0.11  | -0.18 | 0.043 | -0.14 | 1390  | 1490  | 1180  | 1640  | 1610  | 1340  | 1640  | 1430  | 789.1 | 2364.3 | 3 | 0.0211 | 8.92  |
| Uncharacterized protein OS=Bos taurus<br>GN=LOC787568<br>PE=3 SV=1 | tr F1MNF<br>8 F1MNF<br>8_BOVIN | iHFP<br>LATY<br>APVI<br>SAEK | 92% | 44.5 | 52.86187 | Ref | 0.34   | -0.19 | -0.05 | -0.25  | -0.33 | -0.03 | -0.18 | 7750  | 7800  | 5880  | 7240  | 6980  | 5740  | 7410  | 6610  | 592.1 | 2364.4 | 4 | 0.0165 | 6.965 |
| Uncharacterized protein OS=Bos taurus<br>GN=LOC787568<br>PE=3 SV=1 | tr F1MNF<br>8 F1MNF<br>8_BOVIN | iHFP<br>LATY<br>APVI<br>SAEK | 93% | 45.9 | 52.8658  | Ref | -0.015 | -0.41 | 0.049 | -0.35  | -0.23 | 0.3   | -0.15 | 6230  | 4640  | 3830  | 5910  | 4930  | 4700  | 7080  | 5130  | 592.1 | 2364.4 | 4 | 0.0167 | 7.067 |

|                                                                    |                                |                              |     |      |          |     |        |       |       |        |       |       |       |      |      |      |       |       |      |       |      |       |        |   |        |       |
|--------------------------------------------------------------------|--------------------------------|------------------------------|-----|------|----------|-----|--------|-------|-------|--------|-------|-------|-------|------|------|------|-------|-------|------|-------|------|-------|--------|---|--------|-------|
| Uncharacterized protein OS=Bos taurus<br>GN=LOC787568<br>PE=3 SV=1 | tr F1MNF<br>8 F1MNF<br>8_BOVIN | iHFP<br>LATY<br>APVI<br>SAEK | 94% | 50.5 | 52.84128 | Ref | 0.21   | -0.17 | -0    | -0.18  | -0.32 | 0.073 | -0.17 | 1070 | 1030 | 862  | 1090  | 1060  | 836  | 1150  | 961  | 789.1 | 2364.4 | 3 | 0.0161 | 6.827 |
| Uncharacterized protein OS=Bos taurus<br>GN=LOC787568<br>PE=3 SV=1 | tr F1MNF<br>8 F1MNF<br>8_BOVIN | iHFP<br>LATY<br>APVI<br>SAEK | 93% | 45.3 | 52.67172 | Ref | 0.23   | -0.37 | 0.18  | -0.098 | -0.4  | 0.12  | -0.24 | 9190 | 9350 | 6690 | 11000 | 10000 | 7110 | 10600 | 8190 | 592.1 | 2364.4 | 4 | 0.0114 | 4.801 |
| Uncharacterized protein OS=Bos taurus<br>GN=LOC787568<br>PE=3 SV=1 | tr F1MNF<br>8 F1MNF<br>8_BOVIN | iHFP<br>LATY<br>APVI<br>SAEK | 94% | 50.2 | 52.59245 | Ref | 0.24   | -0.22 | 0.11  | -0.12  | -0.25 | 0.014 | -0.17 | 683  | 754  | 594  | 842   | 789   | 628  | 790   | 691  | 789.1 | 2364.4 | 3 | 0.0098 | 4.126 |
| Uncharacterized protein OS=Bos taurus<br>GN=LOC787568<br>PE=3 SV=1 | tr F1MNF<br>8 F1MNF<br>8_BOVIN | iHFP<br>LATY<br>APVI<br>SAEK | 91% | 41.5 | 51.02365 | Ref | 0.25   | -0.26 | 0.13  | -0.2   | -0.28 | 0.047 | -0.14 | 4310 | 4750 | 3620 | 5330  | 4670  | 3840 | 5040  | 4410 | 668.1 | 2668.6 | 4 | 0.0155 | 5.813 |
| Uncharacterized protein OS=Bos taurus<br>GN=LOC787568<br>PE=3 SV=1 | tr F1MNF<br>8 F1MNF<br>8_BOVIN | iHFP<br>LATY<br>APVI<br>SAEK | 81% | 36.2 | 51.37234 | Ref | -0.055 | -0.32 | 0.19  | -0.15  | -0.33 | 0.2   | -0.02 | 2450 | 2110 | 1900 | 3040  | 2640  | 2040 | 3080  | 2620 | 668.1 | 2668.6 | 4 | 0.0211 | 7.91  |
| Uncharacterized protein OS=Bos taurus<br>GN=LOC787568<br>PE=3 SV=1 | tr F1MNF<br>8 F1MNF<br>8_BOVIN | qLFH<br>PEQL<br>ISGK         | 61% | 33.9 | 52.64986 | Ref | 0.21   | -0.17 | -0.05 | -0.14  | -0.38 | 0.1   | -0.13 | 3060 | 3000 | 2510 | 3070  | 3180  | 2340 | 3420  | 2890 | 669.1 | 2004.1 | 3 | 0.0122 | 6.082 |



|                                                                    |                                |                                          |     |      |          |     |       |       |       |        |       |       |       |      |       |      |       |       |      |      |       |       |        |   |        |       |
|--------------------------------------------------------------------|--------------------------------|------------------------------------------|-----|------|----------|-----|-------|-------|-------|--------|-------|-------|-------|------|-------|------|-------|-------|------|------|-------|-------|--------|---|--------|-------|
| Uncharacterized protein OS=Bos taurus<br>GN=LOC787568<br>PE=3 SV=1 | tr F1MNF<br>8 F1MNF<br>8_BOVIN | tIGG<br>GDD<br>SFNT<br>FFSE<br>TGA<br>Gk | 95% | 56   | 53.7495  | Ref | 0.23  | -0.53 | -0.04 | -0.096 | -0.3  | -0.04 | -0.08 | 2430 | 2070  | 1330 | 2100  | 2220  | 1680 | 2110 | 2030  | 872.8 | 2615.3 | 3 | 0.0259 | 9.888 |
| Uncharacterized protein OS=Bos taurus<br>GN=LOC787568<br>PE=3 SV=1 | tr F1MNF<br>8 F1MNF<br>8_BOVIN | tIGG<br>GDD<br>SFNT<br>FFSE<br>TGA<br>Gk | 95% | 66.6 | 53.94405 | Ref | 0.1   | -0.22 | -0.03 | -0.2   | 0.03  | -0.12 | 0.15  | 5670 | 6100  | 5280 | 6750  | 6630  | 6790 | 6390 | 7650  | 872.8 | 2615.3 | 3 | 0.0193 | 7.366 |
| Uncharacterized protein OS=Bos taurus<br>GN=LOC787568<br>PE=3 SV=1 | tr F1MNF<br>8 F1MNF<br>8_BOVIN | tIGG<br>GDD<br>SFNT<br>FFSE<br>TGA<br>Gk | 95% | 85.3 | 53.95564 | Ref | 0.21  | -0.15 | -0.17 | -0.21  | -0.43 | -0.05 | 0.13  | 9540 | 8880  | 7500 | 8310  | 8920  | 6670 | 9090 | 10200 | 872.8 | 2615.3 | 3 | 0.0184 | 7.022 |
| Uncharacterized protein OS=Bos taurus<br>GN=LOC787568<br>PE=3 SV=1 | tr F1MNF<br>8 F1MNF<br>8_BOVIN | tIGG<br>GDD<br>SFNT<br>FFSE<br>TGA<br>Gk | 95% | 62.1 | 53.29884 | Ref | -0.23 | 0.042 | 0.24  | -0.19  | -0.14 | -0.37 | 0.33  | 1740 | 1550  | 2030 | 2620  | 2140  | 1930 | 1720 | 2780  | 873.1 | 2616.3 | 3 | 0.0229 | 8.743 |
| Uncharacterized protein OS=Bos taurus<br>GN=LOC787568<br>PE=3 SV=1 | tr F1MNF<br>8 F1MNF<br>8_BOVIN | vGIN<br>YQP<br>PTVV<br>PGG<br>DLAK       | 92% | 47.7 | 53.42247 | Ref | 0.56  | -0.63 | 0.007 | -0.25  | -0.36 | -0.46 | -0    | 6230 | 6430  | 3060 | 5350  | 4930  | 3980 | 3880 | 5310  | 811.8 | 2432.4 | 3 | 0.0177 | 7.27  |
| Uncharacterized protein OS=Bos taurus<br>GN=LOC787568<br>PE=3 SV=1 | tr F1MNF<br>8 F1MNF<br>8_BOVIN | vGIN<br>YQP<br>PTVV<br>PGG<br>DLAK       | 86% | 42.8 | 53.42247 | Ref | 0.53  | -0.34 | 0.13  | -0.027 | -0.28 | -0.29 | -0.34 | 8820 | 11600 | 6860 | 10600 | 10500 | 7730 | 7990 | 7670  | 811.8 | 2432.4 | 3 | 0.0177 | 7.27  |

|                                                                      |                                                                                                                                                                                                                     |                        |     |      |          |     |        |       |       |        |       |       |       |       |       |       |       |       |       |       |       |       |        |   |        |       |
|----------------------------------------------------------------------|---------------------------------------------------------------------------------------------------------------------------------------------------------------------------------------------------------------------|------------------------|-----|------|----------|-----|--------|-------|-------|--------|-------|-------|-------|-------|-------|-------|-------|-------|-------|-------|-------|-------|--------|---|--------|-------|
| Uncharacterized protein OS=Bos taurus GN=LOC787568 PE=3 SV=1         | tr F1MNF8 F1MNF8_BOVIN                                                                                                                                                                                              | vGIN YQP PTVV PGG DLAK | 77% | 36.6 | 53.43231 | Ref | 0.31   | -0.57 | 0.16  | -0.31  | -0.07 | -0.02 | -0.11 | 19100 | 20600 | 12100 | 22600 | 18000 | 18500 | 20000 | 18700 | 609.1 | 2432.4 | 4 | 0.0175 | 7.174 |
| Uncharacterized protein OS=Bos taurus GN=LOC787568 PE=3 SV=1         | tr F1MNF8 F1MNF8_BOVIN                                                                                                                                                                                              | vGIN YQP PTVV PGG DLAK | 79% | 37.2 | 53.10394 | Ref | 0.39   | -0.32 | 0.1   | -0.076 | -0.19 | 0.084 | -0.35 | 9260  | 12500 | 8300  | 12500 | 12100 | 9800  | 12400 | 9080  | 609.1 | 2432.4 | 4 | 0.0072 | 2.965 |
| Heat shock protein HSP 90-beta OS=Homo sapiens GN=HSP90AB1 PE=1 SV=4 | 8 HS90B_HUMAN,sp P11499 HS90B_MOUSE,sp P34058 HS90B_RAT,sp Q4R4T5 HS90B_MACFA,sp Q5R710 HS90B_PONAB,sp Q76LV1 HS90B_BOVIN,sp Q9GKX8 HS90B_HORSE, tr F1RQU2 F1RQU2_PIG, tr F4NAS1 F4NAS1_BOVIN, tr F7GST0 F7GSTO_MAC | aDH GEPI GR            | 66% | 32.8 | 50.5182  | Ref | -0.037 | -0.04 | -0.08 | -0.2   | -0.06 | -0.29 | -0.12 | 22000 | 17500 | 19000 | 20700 | 21000 | 20200 | 18000 | 20000 | 419.2 | 1254.7 | 3 | 0.0104 | 8.255 |

|                                                                      |                                                                                                                                                                                                                   |              |     |      |          |     |      |      |       |       |       |       |       |       |       |       |       |       |       |       |       |       |        |   |        |       |
|----------------------------------------------------------------------|-------------------------------------------------------------------------------------------------------------------------------------------------------------------------------------------------------------------|--------------|-----|------|----------|-----|------|------|-------|-------|-------|-------|-------|-------|-------|-------|-------|-------|-------|-------|-------|-------|--------|---|--------|-------|
| Heat shock protein HSP 90-beta OS=Homo sapiens GN=HSP90AB1 PE=1 SV=4 | 8 HS90B_HUMAN,sp P11499 HS90B_MOUSE,sp P34058 HS90B_RAT,sp Q4R4T5 HS90B_MACFA,sp Q5R710 HS90B_PONAB,sp Q76LV1 HS90B_BOVIN,sp Q9GKX8 HS90B_HORSE,tr F1RQU2 F1RQU2_PIG,tr F4NAS1 F4NAS1_BO SIN,tr F7GSTO F7GSTO_MAC | aLLFI PR     | 53% | 28.5 | 48.80516 | Ref | 0.19 | -0.4 | 0.069 | -0.21 | -0.48 | 0.071 | -0.22 | 21400 | 19400 | 14100 | 21800 | 19900 | 14400 | 22000 | 17900 | 567.4 | 1132.7 | 2 | 0.0105 | 9.246 |
| Heat shock protein HSP 90-beta OS=Homo sapiens GN=HSP90AB1 PE=1 SV=4 | 8 HS90B_HUMAN,sp P11499 HS90B_MOUSE,sp P34058 HS90B_RAT,sp Q4R4T5 HS90B_MACFA,sp Q5R710 HS90B_PONAB,sp Q76LV1 HS90B_BOVIN,sp Q9GKX8 HS90B_HORSE,tr F1RQU2 F1RQU2_PIG,tr F4NAS1 F4NAS1_BO SIN,tr F7GSTO F7GSTO_MAC | eDQ TEYL EER | 81% | 34.4 | 48.92162 | Ref | 0.24 | -0.2 | 0.056 | -0.14 | -0.17 | -0.22 | -0.41 | 22900 | 23000 | 18400 | 24600 | 23700 | 20300 | 20400 | 17800 | 808.4 | 1614.8 | 2 | 0.0134 | 8.3   |

|                                                                      |                                                                                                                                                                                                                  |                   |     |      |          |     |        |       |       |        |       |       |       |       |       |       |       |       |       |       |       |       |        |   |        |       |
|----------------------------------------------------------------------|------------------------------------------------------------------------------------------------------------------------------------------------------------------------------------------------------------------|-------------------|-----|------|----------|-----|--------|-------|-------|--------|-------|-------|-------|-------|-------|-------|-------|-------|-------|-------|-------|-------|--------|---|--------|-------|
| Heat shock protein HSP 90-beta OS=Homo sapiens GN=HSP90AB1 PE=1 SV=4 | 8 HS90B_HUMAN,sp P11499 HS90B_MOUSE,sp P34058 HS90B_RAT,sp Q4R4T5 HS90B_MACFA,sp Q5R710 HS90B_PONAB,sp Q76LV1 HS90B_BOVIN,sp Q9GKX8 HS90B_HORSE,tr F1RQU2 F1RQU2_PIG,tr F4NAS1 F4NAS1_BOVIN,tr F7GST0 F7GST0_MAC | eLIS NAS DAL Dk   | 95% | 55.7 | 53.42047 | Ref | -0.013 | -0.12 | -0.27 | -0.096 | -0.24 | -0.23 | -0.29 | 27700 | 17900 | 18000 | 18200 | 22700 | 17900 | 18900 | 18000 | 628.7 | 1883   | 3 | 0.013  | 6.892 |
| Heat shock protein HSP 90-beta OS=Homo sapiens GN=HSP90AB1 PE=1 SV=4 | 8 HS90B_HUMAN,sp P11499 HS90B_MOUSE,sp P34058 HS90B_RAT,sp Q4R4T5 HS90B_MACFA,sp Q5R710 HS90B_PONAB,sp Q76LV1 HS90B_BOVIN,sp Q9GKX8 HS90B_HORSE,tr F1RQU2 F1RQU2_PIG,tr F4NAS1 F4NAS1_BOVIN,tr F7GST0 F7GST0_MAC | eLIS NAS DAL DKIR | 51% | 33   | 53.48887 | Ref | 0.12   | -0.11 | 0.022 | -0.1   | -0.2  | -0.14 | -0.38 | 8980  | 8350  | 7740  | 9490  | 9580  | 7810  | 8540  | 7170  | 718.4 | 2152.2 | 3 | 0.0196 | 9.1   |

|                                                                      |                                                                                                                                                                                                                   |              |     |      |          |     |       |       |       |        |       |       |       |       |      |      |      |       |      |       |      |       |        |   |        |       |
|----------------------------------------------------------------------|-------------------------------------------------------------------------------------------------------------------------------------------------------------------------------------------------------------------|--------------|-----|------|----------|-----|-------|-------|-------|--------|-------|-------|-------|-------|------|------|------|-------|------|-------|------|-------|--------|---|--------|-------|
| Heat shock protein HSP 90-beta OS=Homo sapiens GN=HSP90AB1 PE=1 SV=4 | 8 HS90B_HUMAN,sp P11499 HS90B_MOUSE,sp P34058 HS90B_RAT,sp Q4R4T5 HS90B_MACFA,sp Q5R710 HS90B_PONAB,sp Q76LV1 HS90B_BOVIN,sp Q9GKX8 HS90B_HORSE,tr F1RQU2 F1RQU2_PIG,tr F4NAS1 F4NAS1_BOVIN,tr F7GSTO F7GSTO_MACR | eQVANS AFVE  | 93% | 44.9 | 52.10915 | Ref | 0.031 | -0.26 | -0.14 | -0.023 | -0.35 | 0.064 | -0.15 | 8680  | 7360 | 6550 | 7950 | 9510  | 6630 | 9210  | 7870 | 777.4 | 1552.8 | 2 | 0.0091 | 5.874 |
| Heat shock protein HSP 90-beta OS=Homo sapiens GN=HSP90AB1 PE=1 SV=4 | 8 HS90B_HUMAN,sp P11499 HS90B_MOUSE,sp P34058 HS90B_RAT,sp Q4R4T5 HS90B_MACFA,sp Q5R710 HS90B_PONAB,sp Q76LV1 HS90B_BOVIN,sp Q9GKX8 HS90B_HORSE,tr F1RQU2 F1RQU2_PIG,tr F4NAS1 F4NAS1_BOVIN,tr F7GSTO F7GSTO_MACR | eQVAnSA FVER | 67% | 33.8 | 51.65236 | Ref | 0.082 | -0.23 | -0.11 | -0.021 | -0.36 | -0.06 | -0.15 | 10500 | 9090 | 7960 | 9700 | 11400 | 7850 | 10100 | 9380 | 777.9 | 1553.8 | 2 | 0.0124 | 7.999 |

|                                                                      |                                                                                                                                                                                                                  |                            |     |      |          |     |      |       |       |       |       |       |       |      |      |      |      |      |      |      |      |       |      |   |        |       |
|----------------------------------------------------------------------|------------------------------------------------------------------------------------------------------------------------------------------------------------------------------------------------------------------|----------------------------|-----|------|----------|-----|------|-------|-------|-------|-------|-------|-------|------|------|------|------|------|------|------|------|-------|------|---|--------|-------|
| Heat shock protein HSP 90-beta OS=Homo sapiens GN=HSP90AB1 PE=1 SV=4 | 8 HS90B_HUMAN,sp P11499 HS90B_MOUSE,sp P34058 HS90B_RAT,sp Q4R4T5 HS90B_MACFA,sp Q5R710 HS90B_PONAB,sp Q76LV1 HS90B_BOVIN,sp Q9GKX8 HS90B_HORSE,tr F1RQU2 F1RQU2_PIG,tr F4NAS1 F4NAS1_BOVIN,tr F7GST0 F7GST0_MAC | gVV<br>DSE<br>DLPL<br>NISR | 67% | 35.3 | 53.3027  | Ref | 0.14 | -0.4  | -0.14 | 0.37  | -0.4  | 0.022 | -0.37 | 4160 | 4310 | 3210 | 4300 | 6780 | 3460 | 4850 | 3660 | 909.5 | 1817 | 2 | 0.017  | 9.324 |
| Heat shock protein HSP 90-beta OS=Homo sapiens GN=HSP90AB1 PE=1 SV=4 | 8 HS90B_HUMAN,sp P11499 HS90B_MOUSE,sp P34058 HS90B_RAT,sp Q4R4T5 HS90B_MACFA,sp Q5R710 HS90B_PONAB,sp Q76LV1 HS90B_BOVIN,sp Q9GKX8 HS90B_HORSE,tr F1RQU2 F1RQU2_PIG,tr F4NAS1 F4NAS1_BOVIN,tr F7GST0 F7GST0_MAC | gVV<br>DSE<br>DLPL<br>NISR | 95% | 49.9 | 53.42202 | Ref | 0.15 | -0.29 | -0.11 | 0.023 | -0.47 | 0.076 | -0.36 | 8920 | 7810 | 6260 | 7930 | 9580 | 5940 | 9070 | 6640 | 909.5 | 1817 | 2 | 0.0124 | 6.838 |

|                                                                      |                                                                                                                                                                                                                  |                             |     |      |          |     |       |       |       |       |       |       |       |      |      |      |      |      |      |      |      |       |        |   |        |       |
|----------------------------------------------------------------------|------------------------------------------------------------------------------------------------------------------------------------------------------------------------------------------------------------------|-----------------------------|-----|------|----------|-----|-------|-------|-------|-------|-------|-------|-------|------|------|------|------|------|------|------|------|-------|--------|---|--------|-------|
| Heat shock protein HSP 90-beta OS=Homo sapiens GN=HSP90AB1 PE=1 SV=4 | 8 HS90B_HUMAN,sp P11499 HS90B_MOUSE,sp P34058 HS90B_RAT,sp Q4R4T5 HS90B_MACFA,sp Q5R710 HS90B_PONAB,sp Q76LV1 HS90B_BOVIN,sp Q9GKX8 HS90B_HORSE,tr F1RQU2 F1RQU2_PIG,tr F4NAS1 F4NAS1_BOVIN,tr F7GST0 F7GSTO_MAC | hLEI<br>NPD<br>HPIV<br>ETLR | 95% | 54.3 | 53.99609 | Ref | 0.079 | -0.09 | -0.06 | -0.16 | -0.2  | -0.02 | -0.03 | 5210 | 5730 | 5520 | 6360 | 6530 | 5550 | 6560 | 6480 | 696.4 | 2086.1 | 3 | 0.0145 | 6.928 |
| Heat shock protein HSP 90-beta OS=Homo sapiens GN=HSP90AB1 PE=1 SV=4 | 8 HS90B_HUMAN,sp P11499 HS90B_MOUSE,sp P34058 HS90B_RAT,sp Q4R4T5 HS90B_MACFA,sp Q5R710 HS90B_PONAB,sp Q76LV1 HS90B_BOVIN,sp Q9GKX8 HS90B_HORSE,tr F1RQU2 F1RQU2_PIG,tr F4NAS1 F4NAS1_BOVIN,tr F7GST0 F7GSTO_MAC | hLEI<br>NPD<br>HPIV<br>ETLR | 95% | 60.5 | 53.99823 | Ref | 0.31  | 0.044 | -0.09 | -0.23 | -0.25 | -0.28 | -0.09 | 6580 | 8260 | 7430 | 7620 | 7580 | 6540 | 6710 | 7570 | 696.4 | 2086.1 | 3 | 0.0143 | 6.841 |

|                                                                      |                                                                                                                                                                                                                  |                             |     |      |          |     |       |       |       |       |       |       |       |       |       |       |       |       |       |       |       |       |        |   |        |       |
|----------------------------------------------------------------------|------------------------------------------------------------------------------------------------------------------------------------------------------------------------------------------------------------------|-----------------------------|-----|------|----------|-----|-------|-------|-------|-------|-------|-------|-------|-------|-------|-------|-------|-------|-------|-------|-------|-------|--------|---|--------|-------|
| Heat shock protein HSP 90-beta OS=Homo sapiens GN=HSP90AB1 PE=1 SV=4 | 8 HS90B_HUMAN,sp P11499 HS90B_MOUSE,sp P34058 HS90B_RAT,sp Q4R4T5 HS90B_MACFA,sp Q5R710 HS90B_PONAB,sp Q76LV1 HS90B_BOVIN,sp Q9GKX8 HS90B_HORSE,tr F1RQU2 F1RQU2_PIG,tr F4NAS1 F4NAS1_BOVIN,tr F7GST0 F7GST0_MAC | hLEI<br>NPD<br>HPIV<br>ETLR | 95% | 57.7 | 53.93677 | Ref | -0.24 | -0.52 | 0.3   | -0.15 | 0.097 | -0.21 | -0.01 | 26700 | 21400 | 19100 | 37900 | 30500 | 31600 | 26700 | 30500 | 522.5 | 2086.1 | 4 | 0.0121 | 5.79  |
| Heat shock protein HSP 90-beta OS=Homo sapiens GN=HSP90AB1 PE=1 SV=4 | 8 HS90B_HUMAN,sp P11499 HS90B_MOUSE,sp P34058 HS90B_RAT,sp Q4R4T5 HS90B_MACFA,sp Q5R710 HS90B_PONAB,sp Q76LV1 HS90B_BOVIN,sp Q9GKX8 HS90B_HORSE,tr F1RQU2 F1RQU2_PIG,tr F4NAS1 F4NAS1_BOVIN,tr F7GST0 F7GST0_MAC | hLEI<br>NPD<br>HPIV<br>ETLR | 95% | 73.5 | 54.04345 | Ref | 0.081 | 0.048 | -0.01 | -0.18 | -0.22 | -0.12 | -0.12 | 4360  | 4670  | 4950  | 5320  | 5240  | 4440  | 4980  | 4940  | 696.4 | 2086.1 | 3 | 0.0172 | 8.236 |



|                                                                      |                                                                                                                                                                                                                     |                              |     |      |          |     |        |       |      |        |       |       |       |       |       |       |       |       |       |       |       |       |        |   |        |       |
|----------------------------------------------------------------------|---------------------------------------------------------------------------------------------------------------------------------------------------------------------------------------------------------------------|------------------------------|-----|------|----------|-----|--------|-------|------|--------|-------|-------|-------|-------|-------|-------|-------|-------|-------|-------|-------|-------|--------|---|--------|-------|
| Heat shock protein HSP 90-beta OS=Homo sapiens GN=HSP90AB1 PE=1 SV=4 | 8 HS90B_HUMAN,sp P11499 HS90B_MOUSE,sp P34058 HS90B_RAT,sp Q4R4T5 HS90B_MACFA,sp Q5R710 HS90B_PONAB,sp Q76LV1 HS90B_BOVIN,sp Q9GKX8 HS90B_HORSE,trl F1RQU2 F1RQU2_PIG,trl F4NAS1 F4NAS1_BOVIN,trl F7GSTO F7GSTO_MAC | hSQF<br>IGYPI<br>TLYL<br>Ek  | 76% | 38.5 | 53.70395 | Ref | -0.058 | -0.24 | 0.13 | -0.27  | -0.2  | -0.01 | -0.06 | 796   | 679   | 648   | 939   | 787   | 719   | 861   | 821   | 806.5 | 2416.3 | 3 | 0.0124 | 5.149 |
| Heat shock protein HSP 90-beta OS=Homo sapiens GN=HSP90AB1 PE=1 SV=4 | 8 HS90B_HUMAN,sp P11499 HS90B_MOUSE,sp P34058 HS90B_RAT,sp Q4R4T5 HS90B_MACFA,sp Q5R710 HS90B_PONAB,sp Q76LV1 HS90B_BOVIN,sp Q9GKX8 HS90B_HORSE,trl F1RQU2 F1RQU2_PIG,trl F4NAS1 F4NAS1_BOVIN,trl F7GSTO F7GSTO_MAC | kHLE<br>INPD<br>HPIV<br>ETLR | 77% | 32.6 | 52.89022 | Ref | -0.21  | -0.39 | 0.16 | -0.066 | 0.042 | -0.41 | 0.24  | 28200 | 24400 | 23500 | 38400 | 36300 | 34200 | 26200 | 40800 | 504.7 | 2518.4 | 5 | 0.0159 | 6.309 |

|                                                                      |                                                                                                                                                                                                                  |      |     |      |          |     |       |       |       |        |       |       |       |      |      |      |      |      |      |      |      |       |        |   |        |       |
|----------------------------------------------------------------------|------------------------------------------------------------------------------------------------------------------------------------------------------------------------------------------------------------------|------|-----|------|----------|-----|-------|-------|-------|--------|-------|-------|-------|------|------|------|------|------|------|------|------|-------|--------|---|--------|-------|
| Heat shock protein HSP 90-beta OS=Homo sapiens GN=HSP90AB1 PE=1 SV=4 | 8 HS90B_HUMAN,sp P11499 HS90B_MOUSE,sp P34058 HS90B_RAT,sp Q4R4T5 HS90B_MACFA,sp Q5R710 HS90B_PONAB,sp Q76LV1 HS90B_BOVIN,sp Q9GKX8 HS90B_HORSE,tr F1RQU2 F1RQU2_PIG,tr F4NAS1 F4NAS1_BOVIN,tr F7GST0 F7GST0_MAC | ETLR | 92% | 46.6 | 52.77525 | Ref | -0.14 | -0.43 | 0.047 | -0.11  | 0.21  | -0.49 | 0.067 | 4070 | 3220 | 2850 | 4450 | 4390 | 4810 | 3080 | 4500 | 840.5 | 2518.4 | 3 | 0.0137 | 5.45  |
| Heat shock protein HSP 90-beta OS=Homo sapiens GN=HSP90AB1 PE=1 SV=4 | 8 HS90B_HUMAN,sp P11499 HS90B_MOUSE,sp P34058 HS90B_RAT,sp Q4R4T5 HS90B_MACFA,sp Q5R710 HS90B_PONAB,sp Q76LV1 HS90B_BOVIN,sp Q9GKX8 HS90B_HORSE,tr F1RQU2 F1RQU2_PIG,tr F4NAS1 F4NAS1_BOVIN,tr F7GST0 F7GST0_MAC | ETLR | 92% | 46.9 | 52.91591 | Ref | -0.17 | -0.27 | 0.11  | -0.022 | 0.052 | -0.31 | 0.028 | 3910 | 3390 | 3430 | 5010 | 5050 | 4640 | 3770 | 4730 | 840.5 | 2518.4 | 3 | 0.0163 | 6.463 |

|                                                                      |                                                                                                                                                                                                                     |       |     |      |          |     |       |       |      |       |       |       |       |       |       |       |       |       |       |       |       |       |        |   |        |       |
|----------------------------------------------------------------------|---------------------------------------------------------------------------------------------------------------------------------------------------------------------------------------------------------------------|-------|-----|------|----------|-----|-------|-------|------|-------|-------|-------|-------|-------|-------|-------|-------|-------|-------|-------|-------|-------|--------|---|--------|-------|
| Heat shock protein HSP 90-beta OS=Homo sapiens GN=HSP90AB1 PE=1 SV=4 | 8 HS90B_HUMAN,sp P11499 HS90B_MOUSE,sp P34058 HS90B_RAT,sp Q4R4T5 HS90B_MACFA,sp Q5R710 HS90B_PONAB,sp Q76LV1 HS90B_BOVIN,sp Q9GKX8 HS90B_HORSE,trl F1RQU2 F1RQU2_PIG,trl F4NAS1 F4NAS1_BOVIN,trl F7GST0 F7GST0_MAC | ETLR  | 78% | 32.8 | 52.77242 | Ref | -0.21 | -0.53 | 0.05 | 0.014 | 0.12  | -0.43 | 0.094 | 76700 | 55900 | 48800 | 81600 | 87800 | 82600 | 58900 | 84000 | 504.7 | 2518.4 | 5 | 0.0136 | 5.416 |
| Heat shock protein HSP 90-beta OS=Homo sapiens GN=HSP90AB1 PE=1 SV=4 | 8 HS90B_HUMAN,sp P11499 HS90B_MOUSE,sp P34058 HS90B_RAT,sp Q4R4T5 HS90B_MACFA,sp Q5R710 HS90B_PONAB,sp Q76LV1 HS90B_BOVIN,sp Q9GKX8 HS90B_HORSE,trl F1RQU2 F1RQU2_PIG,trl F4NAS1 F4NAS1_BOVIN,trl F7GST0 F7GST0_MAC | VLHLk | 81% | 26   | 39.42703 | Ref | 0.17  | -0.24 | 0.17 | -0.18 | -0.22 | -0.24 | -0.56 | 44700 | 37300 | 30600 | 45500 | 39300 | 33400 | 34400 | 27300 | 444.3 | 1329.9 | 3 | 0.0037 | 2.759 |



|                                                                                  |                                                                                                                                                                                                                                                                                                              |                   |     |      |          |     |      |       |       |       |       |       |       |       |       |       |       |       |       |       |       |       |        |   |        |       |
|----------------------------------------------------------------------------------|--------------------------------------------------------------------------------------------------------------------------------------------------------------------------------------------------------------------------------------------------------------------------------------------------------------|-------------------|-----|------|----------|-----|------|-------|-------|-------|-------|-------|-------|-------|-------|-------|-------|-------|-------|-------|-------|-------|--------|---|--------|-------|
| Heat shock protein<br>HSP 90-beta<br>OS=Homo sapiens<br>GN=HSP90AB1<br>PE=1 SV=4 | 8 HS90B_                                                                                                                                                                                                                                                                                                     | VIDQ<br>EELN<br>k | 94% | 46.8 | 53.12691 | Ref | 0.31 | -0.22 | 0.012 | -0.22 | -0.28 | -0.08 | -0.21 | 21500 | 25100 | 18800 | 24900 | 23400 | 19600 | 23500 | 21200 | 880.5 | 1758.9 | 2 | 0.0147 | 8.381 |
|                                                                                  | HUMAN,s<br>p P11499<br> HS90B_<br>MOUSE,s<br>p P34058<br> HS90B_R<br>AT,sp Q4<br>R4T5 HS9<br>OB_MACF<br>A,sp Q5R<br>710 HS90<br>B_PONAB<br>,sp Q76L<br>V1 HS90B<br>_BOVIN,s<br>p Q9GKX<br>8 HS90B_<br>HORSE,tr <br>F1RQU2 <br>F1RQU2_<br>PIG,tr F4<br>NAS1 F4<br>NAS1_BO<br>SIN,tr F7<br>GST0 F7G<br>STO_MAC |                   |     |      |          |     |      |       |       |       |       |       |       |       |       |       |       |       |       |       |       |       |        |   |        |       |
| Heat shock protein<br>HSP 90-beta<br>OS=Homo sapiens<br>GN=HSP90AB1<br>PE=1 SV=4 | 8 HS90B_                                                                                                                                                                                                                                                                                                     | VIDQ<br>EELn<br>k | 58% | 34   | 53.20192 | Ref | 0.27 | -0.05 | -0.19 | -0.12 | -0.15 | -0.27 | -0.28 | 16700 | 17600 | 15300 | 15600 | 17900 | 15400 | 14800 | 14500 | 587.7 | 1759.9 | 3 | 0.0067 | 3.779 |
|                                                                                  | HUMAN,s<br>p P11499<br> HS90B_<br>MOUSE,s<br>p P34058<br> HS90B_R<br>AT,sp Q4<br>R4T5 HS9<br>OB_MACF<br>A,sp Q5R<br>710 HS90<br>B_PONAB<br>,sp Q76L<br>V1 HS90B<br>_BOVIN,s<br>p Q9GKX<br>8 HS90B_<br>HORSE,tr <br>F1RQU2 <br>F1RQU2_<br>PIG,tr F4<br>NAS1 F4<br>NAS1_BO<br>SIN,tr F7<br>GST0 F7G<br>STO_MAC |                   |     |      |          |     |      |       |       |       |       |       |       |       |       |       |       |       |       |       |       |       |        |   |        |       |

|                                                                                    |                                                                                                                                                                                                                                                   |                         |     |      |          |     |      |       |       |       |       |       |      |       |       |       |       |       |       |       |       |       |        |   |        |       |
|------------------------------------------------------------------------------------|---------------------------------------------------------------------------------------------------------------------------------------------------------------------------------------------------------------------------------------------------|-------------------------|-----|------|----------|-----|------|-------|-------|-------|-------|-------|------|-------|-------|-------|-------|-------|-------|-------|-------|-------|--------|---|--------|-------|
| Heat shock cognate<br>71 kDa protein<br>OS=Equus caballus<br>GN=HSPA8 PE=2<br>SV=1 | 1 HSP7C_ HORSE,sp  P11142  HSP7C_H UMAN,sp  P19120  HSP7C_B OVIN,sp  P19378 H SP7C_CRI GR,sp P6 3017 HSP 7C_MOUS E,sp P630 18 HSP7C _RAT,sp  Q71U34  HSP7C_SA GOE,tr B2 KI81 B2KI 81_RHIFE, tr D2GYC 0 D2GYC 0_AILME,t r E2R0T6  E2R0T6_ CANFA,tr | eIAE<br>AYLG<br>k       | 82% | 38   | 51.83162 | Ref | 0.1  | -0.04 | 0.017 | -0.2  | -0.37 | -0.17 | -0.3 | 19500 | 15000 | 14700 | 17200 | 16400 | 12700 | 15200 | 13700 | 801.5 | 1600.9 | 2 | 0.0062 | 3.866 |
| Heat shock cognate<br>71 kDa protein<br>OS=Equus caballus<br>GN=HSPA8 PE=2<br>SV=1 | 1 HSP7C_ HORSE,sp  P11142  HSP7C_H UMAN,sp  P19120  HSP7C_B OVIN,sp  P19378 H SP7C_CRI GR,sp P6 3017 HSP 7C_MOUS E,sp P630 18 HSP7C _RAT,sp  Q71U34  HSP7C_SA GOE,tr B2 KI81 B2KI 81_RHIFE, tr D2GYC 0 D2GYC 0_AILME,t r E2R0T6  E2R0T6_ CANFA,tr | fDDA<br>VVQ<br>SDM<br>k | 82% | 40.4 | 53.16599 | Ref | 0.05 | -0.17 | -0.39 | -0.11 | -0.14 | -0.02 | 0.15 | 10600 | 9530  | 8900  | 8530  | 11500 | 9770  | 11100 | 12400 | 621.7 | 1862   | 3 | 0.0104 | 5.556 |

|                                                                                    |                                                                                                                                                                                                                                                   |                 |     |     |      |          |     |       |       |      |       |       |       |       |       |       |       |       |       |       |       |       |       |        |   |        |       |
|------------------------------------------------------------------------------------|---------------------------------------------------------------------------------------------------------------------------------------------------------------------------------------------------------------------------------------------------|-----------------|-----|-----|------|----------|-----|-------|-------|------|-------|-------|-------|-------|-------|-------|-------|-------|-------|-------|-------|-------|-------|--------|---|--------|-------|
| Heat shock cognate<br>71 kDa protein<br>OS=Equus caballus<br>GN=HSPA8 PE=2<br>SV=1 | 1 HSP7C_ HORSE,sp  P11142  HSP7C_H UMAN,sp  P19120  HSP7C_B OVIN,sp  P19378 H SP7C_CRI GR,sp P6 3017 HSP 7C_MOUS E,sp P630 18 HSP7C _RAT,sp  Q71U34  HSP7C_SA GOE,tr B2 KI81 B2KI 81_RHIFE, tr D2GYC 0 D2GYC 0_AILME,t r E2R0T6  E2R0T6_ CANFA,tr | FEEL NAD        | LFR | 84% | 38.8 | 51.8608  | Ref | 0.1   | -0.39 | 0.22 | -0.21 | -0.25 | -0.06 | -0.17 | 5190  | 4530  | 3500  | 5970  | 4900  | 4170  | 4960  | 4550  | 779.4 | 1556.8 | 2 | 0.0117 | 7.506 |
| Heat shock cognate<br>71 kDa protein<br>OS=Equus caballus<br>GN=HSPA8 PE=2<br>SV=1 | 1 HSP7C_ HORSE,sp  P11142  HSP7C_H UMAN,sp  P19120  HSP7C_B OVIN,sp  P19378 H SP7C_CRI GR,sp P6 3017 HSP 7C_MOUS E,sp P630 18 HSP7C _RAT,sp  Q71U34  HSP7C_SA GOE,tr B2 KI81 B2KI 81_RHIFE, tr D2GYC 0 D2GYC 0_AILME,t r E2R0T6  E2R0T6_ CANFA,tr | hWP FMV VND AGR | Pk  | 91% | 45.6 | 54.40098 | Ref | 0.084 | -0.43 | 0.11 | -0.1  | -0.23 | 0.2   | -0.07 | 17800 | 19300 | 14600 | 23900 | 22700 | 18100 | 25600 | 21100 | 566.3 | 2261.2 | 4 | 0.0067 | 2.974 |

|                                                                                    |                                                                                                                                                                                                                                                                                                                     |     |     |      |          |     |       |       |      |      |       |       |       |       |      |      |       |       |      |       |       |       |        |   |        |       |
|------------------------------------------------------------------------------------|---------------------------------------------------------------------------------------------------------------------------------------------------------------------------------------------------------------------------------------------------------------------------------------------------------------------|-----|-----|------|----------|-----|-------|-------|------|------|-------|-------|-------|-------|------|------|-------|-------|------|-------|-------|-------|--------|---|--------|-------|
| Heat shock cognate<br>71 kDa protein<br>OS=Equus caballus<br>GN=HSPA8 PE=2<br>SV=1 | 1 HSP7C_                                                                                                                                                                                                                                                                                                            | hWP | 84% | 40.3 | 54.46125 | Ref | 0.081 | -0.3  | 0.14 | -0.3 | -0.17 | 0.053 | -0.16 | 10300 | 9380 | 7810 | 11900 | 9670  | 9240 | 11300 | 9660  | 566.3 | 2261.2 | 4 | 0.013  | 5.768 |
|                                                                                    | HORSE,sp<br> P11142 <br>HSP7C_H<br>UMAN,sp<br> P19120 <br>HSP7C_B<br>OVIN,sp <br>P19378 H<br>SP7C_CRI<br>GR,sp P6<br>3017 HSP<br>7C_MOUS<br>E,sp P630<br>18 HSP7C<br>_RAT,sp <br>Q71U34 <br>HSP7C_SA<br>GOE,tr B2<br>KI81 B2KI<br>81_RHIFE,<br>tr D2GYC<br>0 D2GYC<br>0_AILME,t<br>r E2R0T6<br> E2R0T6_<br>CANFA,tr |     |     |      |          |     |       |       |      |      |       |       |       |       |      |      |       |       |      |       |       |       |        |   |        |       |
| Heat shock cognate<br>71 kDa protein<br>OS=Equus caballus<br>GN=HSPA8 PE=2<br>SV=1 | 1 HSP7C_                                                                                                                                                                                                                                                                                                            | hWP | 70% | 35.7 | 54.44828 | Ref | -0.1  | -0.22 | 0.13 | -0.1 | -0.2  | 0.14  | -0.02 | 9330  | 8930 | 8910 | 12800 | 12000 | 9760 | 12900 | 11500 | 570.3 | 2277.2 | 4 | 0.0087 | 3.81  |
|                                                                                    | HORSE,sp<br> P11142 <br>HSP7C_H<br>UMAN,sp<br> P19120 <br>HSP7C_B<br>OVIN,sp <br>P19378 H<br>SP7C_CRI<br>GR,sp P6<br>3017 HSP<br>7C_MOUS<br>E,sp P630<br>18 HSP7C<br>_RAT,sp <br>Q71U34 <br>HSP7C_SA<br>GOE,tr B2<br>KI81 B2KI<br>81_RHIFE,<br>tr D2GYC<br>0 D2GYC<br>0_AILME,t<br>r E2R0T6<br> E2R0T6_<br>CANFA,tr |     |     |      |          |     |       |       |      |      |       |       |       |       |      |      |       |       |      |       |       |       |        |   |        |       |



|                                                                                    |                                                                                                                                                                                                                                                                                                                     |     |     |      |          |     |       |       |       |       |       |       |       |      |       |      |       |       |      |       |       |       |        |   |        |       |
|------------------------------------------------------------------------------------|---------------------------------------------------------------------------------------------------------------------------------------------------------------------------------------------------------------------------------------------------------------------------------------------------------------------|-----|-----|------|----------|-----|-------|-------|-------|-------|-------|-------|-------|------|-------|------|-------|-------|------|-------|-------|-------|--------|---|--------|-------|
| Heat shock cognate<br>71 kDa protein<br>OS=Equus caballus<br>GN=HSPA8 PE=2<br>SV=1 | 1 HSP7C_                                                                                                                                                                                                                                                                                                            | hWP | 94% | 49.8 | 54.77962 | Ref | 0.23  | -0.07 | 0.045 | -0.2  | -0.25 | -0.07 | -0.18 | 9970 | 11100 | 9770 | 11900 | 11100 | 9350 | 11100 | 10100 | 566.6 | 2262.2 | 4 | 0.0179 | 7.924 |
|                                                                                    | HORSE,sp<br> P11142 <br>HSP7C_H<br>UMAN,sp<br> P19120 <br>HSP7C_B<br>OVIN,sp <br>P19378 H<br>SP7C_CRI<br>GR,sp P6<br>3017 HSP<br>7C_MOUS<br>E,sp P630<br>18 HSP7C<br>_RAT,sp <br>Q71U34 <br>HSP7C_SA<br>GOE,tr B2<br>KI81 B2KI<br>81_RHIFE,<br>tr D2GYC<br>0 D2GYC<br>0_AILME,t<br>r E2R0T6<br> E2R0T6_<br>CANFA,tr |     |     |      |          |     |       |       |       |       |       |       |       |      |       |      |       |       |      |       |       |       |        |   |        |       |
| Heat shock cognate<br>71 kDa protein<br>OS=Equus caballus<br>GN=HSPA8 PE=2<br>SV=1 | 1 HSP7C_                                                                                                                                                                                                                                                                                                            | hWP | 95% | 53.2 | 54.70037 | Ref | 0.075 | -0.28 | 0.013 | -0.11 | -0.12 | -0.1  | -0.03 | 2760 | 2610  | 2220 | 3040  | 3090  | 2670 | 2830  | 2950  | 755.1 | 2262.2 | 3 | 0.0067 | 2.982 |
|                                                                                    | HORSE,sp<br> P11142 <br>HSP7C_H<br>UMAN,sp<br> P19120 <br>HSP7C_B<br>OVIN,sp <br>P19378 H<br>SP7C_CRI<br>GR,sp P6<br>3017 HSP<br>7C_MOUS<br>E,sp P630<br>18 HSP7C<br>_RAT,sp <br>Q71U34 <br>HSP7C_SA<br>GOE,tr B2<br>KI81 B2KI<br>81_RHIFE,<br>tr D2GYC<br>0 D2GYC<br>0_AILME,t<br>r E2R0T6<br> E2R0T6_<br>CANFA,tr |     |     |      |          |     |       |       |       |       |       |       |       |      |       |      |       |       |      |       |       |       |        |   |        |       |

|                                                                                    |                                                                                                                                                                                                                                                   |                     |     |      |          |     |        |       |      |        |       |       |       |       |       |       |       |       |       |       |       |       |        |   |        |       |
|------------------------------------------------------------------------------------|---------------------------------------------------------------------------------------------------------------------------------------------------------------------------------------------------------------------------------------------------|---------------------|-----|------|----------|-----|--------|-------|------|--------|-------|-------|-------|-------|-------|-------|-------|-------|-------|-------|-------|-------|--------|---|--------|-------|
| Heat shock cognate<br>71 kDa protein<br>OS=Equus caballus<br>GN=HSPA8 PE=2<br>SV=1 | 1 HSP7C_ HORSE,sp  P11142  HSP7C_H UMAN,sp  P19120  HSP7C_B OVIN,sp  P19378 H SP7C_CRI GR,sp P6 3017 HSP 7C_MOUS E,sp P630 18 HSP7C _RAT,sp  Q71U34  HSP7C_SA GOE,tr B2 KI81 B2KI 81_RHIFE, tr D2GYC 0 D2GYC 0_AILME,t r E2R0T6  E2R0T6_ CANFA,tr | iINEP TAA AIAY GLDk | 93% | 44.4 | 51.14281 | Ref | -0.075 | -0.63 | 0.03 | -0.002 | 0.045 | 0.086 | -0.26 | 44900 | 34400 | 25500 | 45100 | 48600 | 43900 | 47100 | 36700 | 675.9 | 2699.6 | 4 | 0.0228 | 8.449 |
| Heat shock cognate<br>71 kDa protein<br>OS=Equus caballus<br>GN=HSPA8 PE=2<br>SV=1 | 1 HSP7C_ HORSE,sp  P11142  HSP7C_H UMAN,sp  P19120  HSP7C_B OVIN,sp  P19378 H SP7C_CRI GR,sp P6 3017 HSP 7C_MOUS E,sp P630 18 HSP7C _RAT,sp  Q71U34  HSP7C_SA GOE,tr B2 KI81 B2KI 81_RHIFE, tr D2GYC 0 D2GYC 0_AILME,t r E2R0T6  E2R0T6_ CANFA,tr | iINEP TAA AIAY GLDk | 95% | 53.9 | 50.89082 | Ref | -0.006 | -0.43 | 0.18 | -0.016 | -0.14 | -0.23 | -0.09 | 5550  | 4530  | 3660  | 6260  | 6040  | 4850  | 4730  | 5190  | 900.9 | 2699.6 | 3 | 0.0176 | 6.525 |

|                                                                                    |                                                                                                                                                                                                                                                   |                       |     |      |          |     |       |       |       |       |       |       |       |       |       |       |       |       |       |       |       |       |        |   |        |       |
|------------------------------------------------------------------------------------|---------------------------------------------------------------------------------------------------------------------------------------------------------------------------------------------------------------------------------------------------|-----------------------|-----|------|----------|-----|-------|-------|-------|-------|-------|-------|-------|-------|-------|-------|-------|-------|-------|-------|-------|-------|--------|---|--------|-------|
| Heat shock cognate<br>71 kDa protein<br>OS=Equus caballus<br>GN=HSPA8 PE=2<br>SV=1 | 1 HSP7C_ HORSE,sp  P11142  HSP7C_H UMAN,sp  P19120  HSP7C_B OVIN,sp  P19378 H SP7C_CRI GR,sp P6 3017 HSP 7C_MOUS E,sp P630 18 HSP7C _RAT,sp  Q71U34  HSP7C_SA GOE,tr B2 KI81 B2KI 81_RHIFE, tr D2GYC 0 D2GYC 0_AILME,t r E2R0T6  E2R0T6_ CANFA,tr | IDkS QIH DIVL VGG STR | 88% | 43.3 | 52.45293 | Ref | -0.06 | -0.28 | 0.099 | -0.08 | -0.18 | 0.083 | 0.003 | 3030  | 2880  | 2680  | 3920  | 3820  | 3110  | 3900  | 3660  | 816.1 | 2445.4 | 3 | 0.0117 | 4.765 |
| Heat shock cognate<br>71 kDa protein<br>OS=Equus caballus<br>GN=HSPA8 PE=2<br>SV=1 | 1 HSP7C_ HORSE,sp  P11142  HSP7C_H UMAN,sp  P19120  HSP7C_B OVIN,sp  P19378 H SP7C_CRI GR,sp P6 3017 HSP 7C_MOUS E,sp P630 18 HSP7C _RAT,sp  Q71U34  HSP7C_SA GOE,tr B2 KI81 B2KI 81_RHIFE, tr D2GYC 0 D2GYC 0_AILME,t r E2R0T6  E2R0T6_ CANFA,tr | nQV AMN PTNT VFD Ak   | 95% | 60.5 | 54.44956 | Ref | -0.18 | -0.25 | 0.074 | 0.026 | -0.32 | 0.033 | -0.14 | 15600 | 11000 | 11300 | 15900 | 16900 | 11600 | 15500 | 13600 | 753.4 | 2257.2 | 3 | 0.0187 | 8.27  |

|                                                                                    |                                                                                                                                                                                                                                                   |               |     |      |          |     |        |       |       |        |       |       |       |      |      |      |      |      |      |      |      |       |      |   |        |       |
|------------------------------------------------------------------------------------|---------------------------------------------------------------------------------------------------------------------------------------------------------------------------------------------------------------------------------------------------|---------------|-----|------|----------|-----|--------|-------|-------|--------|-------|-------|-------|------|------|------|------|------|------|------|------|-------|------|---|--------|-------|
| Heat shock cognate<br>71 kDa protein<br>OS=Equus caballus<br>GN=HSPA8 PE=2<br>SV=1 | 1 HSP7C_ HORSE,sp  P11142  HSP7C_H UMAN,sp  P19120  HSP7C_B OVIN,sp  P19378 H SP7C_CRI GR,sp P6 3017 HSP 7C_MOUS E,sp P630 18 HSP7C _RAT,sp  Q71U34  HSP7C_SA GOE,tr B2 KI81 B2KI 81_RHIFE, tr D2GYC 0 D2GYC 0_AILME,t r E2R0T6  E2R0T6_ CANFA,tr | nSLE SYAF NMk | 82% | 40.4 | 53.3997  | Ref | -0.054 | -0.31 | -0.01 | -0.19  | -0.16 | -0.18 | 0.49  | 4120 | 4340 | 3940 | 5460 | 5300 | 4740 | 4860 | 7670 | 638   | 1911 | 3 | 0.0174 | 9.118 |
| Heat shock cognate<br>71 kDa protein<br>OS=Equus caballus<br>GN=HSPA8 PE=2<br>SV=1 | 1 HSP7C_ HORSE,sp  P11142  HSP7C_H UMAN,sp  P19120  HSP7C_B OVIN,sp  P19378 H SP7C_CRI GR,sp P6 3017 HSP 7C_MOUS E,sp P630 18 HSP7C _RAT,sp  Q71U34  HSP7C_SA GOE,tr B2 KI81 B2KI 81_RHIFE, tr D2GYC 0 D2GYC 0_AILME,t r E2R0T6  E2R0T6_ CANFA,tr | nSLE SYAF NMk | 87% | 43   | 53.06103 | Ref | -0.17  | -0.2  | -0.06 | -0.088 | 0.042 | -0.27 | 0.031 | 8820 | 6300 | 6700 | 8260 | 8950 | 8550 | 7190 | 8800 | 638.3 | 1912 | 3 | 0.0186 | 9.698 |

|                                                                                    |                                                                                                                                                                                                                                                   |                   |     |      |          |     |       |       |       |       |       |       |       |       |       |       |       |       |       |       |       |       |        |   |        |       |
|------------------------------------------------------------------------------------|---------------------------------------------------------------------------------------------------------------------------------------------------------------------------------------------------------------------------------------------------|-------------------|-----|------|----------|-----|-------|-------|-------|-------|-------|-------|-------|-------|-------|-------|-------|-------|-------|-------|-------|-------|--------|---|--------|-------|
| Heat shock cognate<br>71 kDa protein<br>OS=Equus caballus<br>GN=HSPA8 PE=2<br>SV=1 | 1 HSP7C_ HORSE,sp  P11142  HSP7C_H UMAN,sp  P19120  HSP7C_B OVIN,sp  P19378 H SP7C_CRI GR,sp P6 3017 HSP 7C_MOUS E,sp P630 18 HSP7C _RAT,sp  Q71U34  HSP7C_SA GOE,tr B2 KI81 B2KI 81_RHIFE, tr D2GYC 0 D2GYC 0_AILME,t r E2R0T6  E2R0T6_ CANFA,tr | nSLE SYAF NMc     | 73% | 37.4 | 53.29447 | Ref | -0.18 | -0.21 | -0.13 | -0.24 | -0.06 | -0.15 | 0.086 | 7070  | 4540  | 4850  | 5740  | 5850  | 5810  | 5670  | 6650  | 638.3 | 1912   | 3 | 0.0074 | 3.848 |
| Heat shock cognate<br>71 kDa protein<br>OS=Equus caballus<br>GN=HSPA8 PE=2<br>SV=1 | 1 HSP7C_ HORSE,sp  P11142  HSP7C_H UMAN,sp  P19120  HSP7C_B OVIN,sp  P19378 H SP7C_CRI GR,sp P6 3017 HSP 7C_MOUS E,sp P630 18 HSP7C _RAT,sp  Q71U34  HSP7C_SA GOE,tr B2 KI81 B2KI 81_RHIFE, tr D2GYC 0 D2GYC 0_AILME,t r E2R0T6  E2R0T6_ CANFA,tr | sFYP EEVS SMV LTK | 92% | 48.9 | 54.43473 | Ref | 0.18  | -0.35 | 0.2   | 0.029 | -0.33 | -0.09 | -0.24 | 29700 | 30800 | 23100 | 37900 | 37200 | 25300 | 31200 | 27900 | 742.4 | 2224.2 | 3 | 0.017  | 7.621 |

|                                                                                    |                                                                                                                                                                                                                                                   |                            |     |      |          |     |       |       |       |       |       |       |       |      |      |      |      |      |      |       |      |       |        |   |        |       |
|------------------------------------------------------------------------------------|---------------------------------------------------------------------------------------------------------------------------------------------------------------------------------------------------------------------------------------------------|----------------------------|-----|------|----------|-----|-------|-------|-------|-------|-------|-------|-------|------|------|------|------|------|------|-------|------|-------|--------|---|--------|-------|
| Heat shock cognate<br>71 kDa protein<br>OS=Equus caballus<br>GN=HSPA8 PE=2<br>SV=1 | 1 HSP7C_ HORSE,sp  P11142  HSP7C_H UMAN,sp  P19120  HSP7C_B OVIN,sp  P19378 H SP7C_CRI GR,sp P6 3017 HSP 7C_MOUS E,sp P630 18 HSP7C _RAT,sp  Q71U34  HSP7C_SA GOE,tr B2 KI81 B2KI 81_RHIFE, tr D2GYC 0 D2GYC 0_AILME,t r E2R0T6  E2R0T6_ CANFA,tr | sFYP<br>EEVS<br>SMV<br>LTK | 84% | 42.7 | 54.49525 | Ref | 0.19  | -0.17 | 0.045 | 0.005 | -0.26 | -0.23 | -0.2  | 7900 | 7800 | 6620 | 8620 | 9240 | 6710 | 7150  | 7250 | 742.4 | 2224.2 | 3 | 0.0151 | 6.798 |
| Heat shock cognate<br>71 kDa protein<br>OS=Equus caballus<br>GN=HSPA8 PE=2<br>SV=1 | 1 HSP7C_ HORSE,sp  P11142  HSP7C_H UMAN,sp  P19120  HSP7C_B OVIN,sp  P19378 H SP7C_CRI GR,sp P6 3017 HSP 7C_MOUS E,sp P630 18 HSP7C _RAT,sp  Q71U34  HSP7C_SA GOE,tr B2 KI81 B2KI 81_RHIFE, tr D2GYC 0 D2GYC 0_AILME,t r E2R0T6  E2R0T6_ CANFA,tr | sFYP<br>EEVS<br>SmV<br>LTK | 65% | 36.6 | 54.48235 | Ref | 0.052 | -0.41 | -0.14 | -0.19 | -0.26 | 0.42  | -0.12 | 7310 | 6920 | 5440 | 7390 | 7830 | 6520 | 10900 | 7470 | 747.7 | 2240.2 | 3 | 0.007  | 3.13  |

|                                                                                    |                                                                                                                                                                                                                                                   |                      |     |      |          |     |      |       |       |       |       |       |       |       |       |       |       |       |       |       |       |       |        |   |        |       |
|------------------------------------------------------------------------------------|---------------------------------------------------------------------------------------------------------------------------------------------------------------------------------------------------------------------------------------------------|----------------------|-----|------|----------|-----|------|-------|-------|-------|-------|-------|-------|-------|-------|-------|-------|-------|-------|-------|-------|-------|--------|---|--------|-------|
| Heat shock cognate<br>71 kDa protein<br>OS=Equus caballus<br>GN=HSPA8 PE=2<br>SV=1 | 1 HSP7C_ HORSE,sp  P11142  HSP7C_H UMAN,sp  P19120  HSP7C_B OVIN,sp  P19378 H SP7C_CRI GR,sp P6 3017 HSP 7C_MOUS E,sp P630 18 HSP7C _RAT,sp  Q71U34  HSP7C_SA GOE,tr B2 KI81 B2KI 81_RHIFE, tr D2GYC 0 D2GYC 0_AILME,t r E2R0T6  E2R0T6_ CANFA,tr | STAG DTHL GGE DFD NR | 76% | 34.2 | 49.24677 | Ref | 0.36 | -0.11 | -0.09 | -0.27 | -0.16 | -0.2  | 0.074 | 36600 | 49000 | 38500 | 43700 | 42600 | 40200 | 40700 | 49000 | 666   | 1994.9 | 3 | 0.0131 | 6.567 |
| Heat shock cognate<br>71 kDa protein<br>OS=Equus caballus<br>GN=HSPA8 PE=2<br>SV=1 | 1 HSP7C_ HORSE,sp  P11142  HSP7C_H UMAN,sp  P19120  HSP7C_B OVIN,sp  P19378 H SP7C_CRI GR,sp P6 3017 HSP 7C_MOUS E,sp P630 18 HSP7C _RAT,sp  Q71U34  HSP7C_SA GOE,tr B2 KI81 B2KI 81_RHIFE, tr D2GYC 0 D2GYC 0_AILME,t r E2R0T6  E2R0T6_ CANFA,tr | TPS YVAF TDTE R      | 95% | 70.7 | 51.89122 | Ref | 0.11 | -0.43 | 0.081 | -0.21 | -0.1  | -0.18 | 0.005 | 3780  | 3350  | 2510  | 4010  | 3610  | 3420  | 3370  | 3800  | 896.5 | 1790.9 | 2 | 0.0124 | 6.94  |

|                                                                                   |                                                                                                                                                                                                                        |                          |     |      |          |     |                         |                         |                                |                        |                         |                       |                        |                         |                         |                         |                                |                        |                         |                       |                        |       |        |   |        |       |
|-----------------------------------------------------------------------------------|------------------------------------------------------------------------------------------------------------------------------------------------------------------------------------------------------------------------|--------------------------|-----|------|----------|-----|-------------------------|-------------------------|--------------------------------|------------------------|-------------------------|-----------------------|------------------------|-------------------------|-------------------------|-------------------------|--------------------------------|------------------------|-------------------------|-----------------------|------------------------|-------|--------|---|--------|-------|
| Heat shock cognate 71 kDa protein OS=Equus caballus GN=HSPA8 PE=2 SV=1            | 1 HSP7C_HORSE,sp P11142 HSP7C_HUMAN,sp P19120 HSP7C_BOVIN,sp P19378 HSP7C_CRIGR,sp P63017 HSP7C_MOUSE,sp P63018 HSP7C_RAT,sp Q71U34 HSP7C_SAGO,sp B2KI81 B2KI81_RHIFE,sp D2GYC0 D2GYC0_AILME,sp E2R0T6 E2R0T6_CANFA,sp | vcNP                     | 63% | 33.8 | 52.13396 | Ref | -0.3                    | -0.33                   | -0.08                          | 0.13                   | -0.01                   | -0.19                 | 0.15                   | 39300                   | 27900                   | 29800                   | 39600                          | 50700                  | 40100                   | 36900                 | 46600                  | 514.6 | 1540.9 | 3 | 0.0129 | 8.351 |
| 60 kDa heat shock protein, mitochondrial OS=Cricetulus griseus GN=HSPD1 PE=2 SV=1 | 7 CH60_C RIGR,sp P63038 CH60_MOUSE,sp P63039 CH60_RAT,sp E2QUU5 E2QUU5_CANFA,sp E2REN7 E2REN7_CANFA,sp F1MUZ9 F1MUZ9_BOVIN,sp F1SMZ7 F1SMZ7_PIG,sp F6Z587 F6Z587_HORSE,sp F7BGB7 F7BGB7_MACMU,sp F7I3J9 F7I3J9_CALI    | aLM LQG VDLL ADA VAV TmG | 95% | 55.5 | 54.10176 | Ref | No Values (-0.35774875) | No Values (-0.47544202) | Reference Missing (-1.3617414) | No Values (-0.7825161) | No Values (-0.58664364) | No Values (-0.649362) | No Values (-0.6385387) | No Values (-0.56013875) | No Values (-0.35774875) | No Values (-0.47544202) | Reference Missing (-1.3617414) | No Values (-0.7825161) | No Values (-0.58664364) | No Values (-0.649362) | No Values (-0.6385387) | 913.2 | 2736.5 | 3 | 0.0203 | 7.401 |



|                                                                                   |                                                                                                                                                                                               |                             |     |      |          |     |                        |                     |                        |                        |                        |                         |                        |                         |                         |                     |                         |                        |                        |                         |                        |       |        |   |        |       |
|-----------------------------------------------------------------------------------|-----------------------------------------------------------------------------------------------------------------------------------------------------------------------------------------------|-----------------------------|-----|------|----------|-----|------------------------|---------------------|------------------------|------------------------|------------------------|-------------------------|------------------------|-------------------------|-------------------------|---------------------|-------------------------|------------------------|------------------------|-------------------------|------------------------|-------|--------|---|--------|-------|
| 60 kDa heat shock protein, mitochondrial OS=Cricetulus griseus GN=HSPD1 PE=2 SV=1 | 7 CH60_C RIGR,sp P63038 CH60_MOUSE,sp P63039 CH60_RAT,tr E2QUU5 E2QUU5_CANFA,tr F1MUZ9 F1MUZ9_BOVIN,tr F1SMZ7 F1SMZ7_PIG,tr F6Z587 F6Z587_HORSE,tr F7BGB7 F7BGB7_MACMU,tr F713J9 F713J9_CALIA | aLM LQG VDLL ADA VAV TmG Pk | 53% | 33.7 | 53.83576 | Ref | No Values (0.08678025) | No Values (-0.0304) | No Values (-0.1975078) | No Values (-0.3379871) | No Values (-0.1421446) | No Values (-0.20488144) | No Values (-0.1940734) | No Values (-0.11560978) | No Values (-0.08678025) | No Values (-0.0304) | No Values (-0.1975078)  | No Values (-0.3379871) | No Values (-0.1421446) | No Values (-0.20488144) | No Values (-0.1940734) | 913.2 | 2736.5 | 3 | 0.0104 | 3.784 |
| 60 kDa heat shock protein, mitochondrial OS=Cricetulus griseus GN=HSPD1 PE=2 SV=1 | 7 CH60_C RIGR,sp P63038 CH60_MOUSE,sp P63039 CH60_RAT,tr E2QUU5 E2QUU5_CANFA,tr F1MUZ9 F1MUZ9_BOVIN,tr F1SMZ7 F1SMZ7_PIG,tr F6Z587 F6Z587_HORSE,tr F7BGB7 F7BGB7_MACMU,tr F713J9 F713J9_CALIA | aLM LQG VDLL ADA VAV TmG Pk | 95% | 53.9 | 53.95089 | Ref | No Values (0.08678025) | No Values (-0.0306) | No Values (-0.1979)    | No Values (-0.3379871) | No Values (-0.1421474) | No Values (-0.20488136) | No Values (-0.1940723) | No Values (-0.11560978) | No Values (-0.08678025) | No Values (-0.0306) | No Values (-0.19750799) | No Values (-0.3379871) | No Values (-0.1421474) | No Values (-0.20488136) | No Values (-0.1940723) | 913.2 | 2736.5 | 3 | 0.0153 | 5.593 |

|                                                                                   |                                                                                                                                                                                                                       |                            |     |      |          |     |                            |                            |       |       |                            |                            |                            |     |                            |                            |     |     |                            |                            |                            |       |        |   |        |       |
|-----------------------------------------------------------------------------------|-----------------------------------------------------------------------------------------------------------------------------------------------------------------------------------------------------------------------|----------------------------|-----|------|----------|-----|----------------------------|----------------------------|-------|-------|----------------------------|----------------------------|----------------------------|-----|----------------------------|----------------------------|-----|-----|----------------------------|----------------------------|----------------------------|-------|--------|---|--------|-------|
| 60 kDa heat shock protein, mitochondrial OS=Cricetulus griseus GN=HSPD1 PE=2 SV=1 | 7 CH60_C RIGR,sp P63038 CH60_MOUSE,sp P63039 CH60_RAT,tr E2QUU5 E2QUU5_CANFA,tr E2REN7 E2REN7_CANFA,tr F1MUZ9 F1MUZ9_BOVIN,tr F1SMZ7 F1SMZ7_PIG,tr F6Z587 F6Z587_HORSE,tr F7BGB7 F7BGB7_MACMU,tr F713J9 F713J9_CALJAK | aLmL QGV DLLA DAV AVT mGPK | 79% | 40.5 | 54.39454 | Ref | Value Missing (-1.5297354) | Value Missing (-1.6474285) | 0.7   | 1.1   | Value Missing (-1.7586304) | Value Missing (-1.8213968) | Value Missing (-1.8105226) | 121 | Value Missing (-1.5297354) | Value Missing (-1.6474285) | 105 | 153 | Value Missing (-1.7586304) | Value Missing (-1.8213968) | Value Missing (-1.8105226) | 918.5 | 2752.5 | 3 | 0.0172 | 6.251 |
| 60 kDa heat shock protein, mitochondrial OS=Cricetulus griseus GN=HSPD1 PE=2 SV=1 | 7 CH60_C RIGR,sp P63038 CH60_MOUSE,sp P63039 CH60_RAT,tr E2QUU5 E2QUU5_CANFA,tr E2REN7 E2REN7_CANFA,tr F1MUZ9 F1MUZ9_BOVIN,tr F1SMZ7 F1SMZ7_PIG,tr F6Z587 F6Z587_HORSE,tr F7BGB7 F7BGB7_MACMU,tr F713J9 F713J9_CALJAK | gVM LAV DAVI AELK          | 95% | 61.9 | 51.28047 | Ref | -0.17                      | -0.24                      | -0.08 | -0.43 | -0.02                      | -0.12                      | -0.67                      | 344 | 202                        | 208                        | 262 | 226 | 263                        | 255                        | 173                        | 679.7 | 2036.2 | 3 | 0.0159 | 7.821 |

|                                                                                   |                                                                                                                                                                                                                       |                   |     |      |          |     |       |       |       |       |       |      |       |     |     |     |     |     |     |     |     |       |        |   |        |       |
|-----------------------------------------------------------------------------------|-----------------------------------------------------------------------------------------------------------------------------------------------------------------------------------------------------------------------|-------------------|-----|------|----------|-----|-------|-------|-------|-------|-------|------|-------|-----|-----|-----|-----|-----|-----|-----|-----|-------|--------|---|--------|-------|
| 60 kDa heat shock protein, mitochondrial OS=Cricetulus griseus GN=HSPD1 PE=2 SV=1 | 7 CH60_C RIGR,sp P63038 CH60_MOUSE,sp P63039 CH60_RAT,tr E2QUU5 E2QUU5_CANFA,tr E2REN7 E2REN7_CANFA,tr F1MUZ9 F1MUZ9_BOVIN,tr F1SMZ7 F1SMZ7_PIG,tr F6Z587 F6Z587_HORSE,tr F7BGB7 F7BGB7_MACMU,tr F713J9 F713J9_CALJ A | gVm LAV DAVI AELK | 94% | 49   | 51.79736 | Ref | 0.13  | -0.28 | -0.12 | -0.36 | -0.58 | 0.07 | -0.43 | 433 | 347 | 283 | 356 | 332 | 248 | 407 | 286 | 685.1 | 2052.2 | 3 | 0.009  | 4.363 |
| 60 kDa heat shock protein, mitochondrial OS=Cricetulus griseus GN=HSPD1 PE=2 SV=1 | 7 CH60_C RIGR,sp P63038 CH60_MOUSE,sp P63039 CH60_RAT,tr E2QUU5 E2QUU5_CANFA,tr E2REN7 E2REN7_CANFA,tr F1MUZ9 F1MUZ9_BOVIN,tr F1SMZ7 F1SMZ7_PIG,tr F6Z587 F6Z587_HORSE,tr F7BGB7 F7BGB7_MACMU,tr F713J9 F713J9_CALJ A | gVm LAV DAVI AELK | 69% | 34.6 | 51.69077 | Ref | 0.025 | -0.36 | -0.02 | -0.44 | -0.33 | 0.13 | -0.19 | 256 | 230 | 191 | 271 | 224 | 211 | 302 | 240 | 685.1 | 2052.2 | 3 | 0.0068 | 3.296 |

|                                                                                   |                                                                                                                                                                                                                     |                                    |     |      |          |     |        |       |      |       |       |       |       |      |      |      |      |      |      |      |      |       |        |   |        |       |
|-----------------------------------------------------------------------------------|---------------------------------------------------------------------------------------------------------------------------------------------------------------------------------------------------------------------|------------------------------------|-----|------|----------|-----|--------|-------|------|-------|-------|-------|-------|------|------|------|------|------|------|------|------|-------|--------|---|--------|-------|
| 60 kDa heat shock protein, mitochondrial OS=Cricetulus griseus GN=HSPD1 PE=2 SV=1 | 7 CH60_C RIGR,sp P63038 CH60_MOUSE,sp P63039 CH60_RAT,tr E2QUU5 E2QUU5_CANFA,tr E2REN7 E2REN7_CANFA,tr F1MUZ9 F1MUZ9_BOVIN,tr F1SMZ7 F1SMZ7_PIG,tr F6Z587 F6Z587_HORSE,tr F7BGB7 F7BGB7_MACMU,tr F713J9 F713J9_CALI | gYIS<br>PYFI                       | 64% | 35.7 | 53.78607 | Ref | -0.032 | -0.17 | -0.1 | -0.46 | -0.32 | -0.06 | 0.023 | 4540 | 3970 | 3920 | 4610 | 3950 | 3800 | 4760 | 5010 | 666.7 | 1997.1 | 3 | 0.0199 | 9.953 |
| 60 kDa heat shock protein, mitochondrial OS=Cricetulus griseus GN=HSPD1 PE=2 SV=1 | 7 CH60_C RIGR,sp P63038 CH60_MOUSE,sp P63039 CH60_RAT,tr E2QUU5 E2QUU5_CANFA,tr E2REN7 E2REN7_CANFA,tr F1MUZ9 F1MUZ9_BOVIN,tr F1SMZ7 F1SMZ7_PIG,tr F6Z587 F6Z587_HORSE,tr F7BGB7 F7BGB7_MACMU,tr F713J9 F713J9_CALI | iSSV<br>QsIV<br>PALE<br>IANA<br>HR | 95% | 67.9 | 53.3654  | Ref | 0.36   | -0.16 | -0.1 | -0.23 | -0.22 | -0.45 | -0.18 | 1210 | 1610 | 1220 | 1430 | 1440 | 1270 | 1130 | 1350 | 737.1 | 2208.2 | 3 | 0.0112 | 5.08  |

|                                                                                   |                                                                                                                                                                                                 |                                      |     |      |          |     |       |       |       |       |       |       |       |      |      |      |      |      |      |      |      |       |        |   |        |       |
|-----------------------------------------------------------------------------------|-------------------------------------------------------------------------------------------------------------------------------------------------------------------------------------------------|--------------------------------------|-----|------|----------|-----|-------|-------|-------|-------|-------|-------|-------|------|------|------|------|------|------|------|------|-------|--------|---|--------|-------|
| 60 kDa heat shock protein, mitochondrial OS=Cricetulus griseus GN=HSPD1 PE=2 SV=1 | 7 CH60_C RIGR,sp P63038 CH60_MOUSE,sp P63039 CH60_RAT,tr E2QUU5 E2QUU5_CANFA,tr F1MUZ9 F1MUZ9_BOVIN,tr F1SMZ7 F1SMZ7_PIG,tr F6Z587 F6Z587_HORSE,tr F7BGB7 F7BGB7_MACMU,tr F713J9 F713J9_CALJANA | ISSV<br>QSIV<br>PALE<br>IANA         | 95% | 53.9 | 52.58412 | Ref | 0.32  | -0.28 | -0.05 | -0.27 | -0.14 | -0.46 | -0.07 | 1220 | 1620 | 1160 | 1530 | 1440 | 1390 | 1150 | 1510 | 737.1 | 2208.3 | 3 | 0.0163 | 7.358 |
| 60 kDa heat shock protein, mitochondrial OS=Cricetulus griseus GN=HSPD1 PE=2 SV=1 | 7 CH60_C RIGR,sp P63038 CH60_MOUSE,sp P63039 CH60_RAT,tr E2QUU5 E2QUU5_CANFA,tr F1MUZ9 F1MUZ9_BOVIN,tr F1SMZ7 F1SMZ7_PIG,tr F6Z587 F6Z587_HORSE,tr F7BGB7 F7BGB7_MACMU,tr F713J9 F713J9_CALJANA | KISS<br>VQSI<br>VPAL<br>EIAAn<br>AHR | 95% | 52.9 | 52.13411 | Ref | -0.12 | -0.19 | -0.04 | -0.25 | -0.21 | -0.12 | -0.16 | 1140 | 929  | 956  | 1200 | 1140 | 1020 | 1130 | 1090 | 661.4 | 2641.5 | 4 | 0.0194 | 7.347 |

|                                                                                   |                                                                                                                                                                                                |                |     |      |          |     |       |       |       |       |       |       |       |       |       |      |       |       |      |       |       |       |        |   |        |       |
|-----------------------------------------------------------------------------------|------------------------------------------------------------------------------------------------------------------------------------------------------------------------------------------------|----------------|-----|------|----------|-----|-------|-------|-------|-------|-------|-------|-------|-------|-------|------|-------|-------|------|-------|-------|-------|--------|---|--------|-------|
| 60 kDa heat shock protein, mitochondrial OS=Cricetulus griseus GN=HSPD1 PE=2 SV=1 | 7 CH60_C RIGR,sp P63038 CH60_MOUSE,sp P63039 CH60_RAT,tr E2QUU5 E2QUU5_CANFA,tr F1MUZ9 F1MUZ9_BOVIN,tr F1SMZ7 F1SMZ7_PIG,tr F6Z587 F6Z587_HORSE,tr F7BGB7 F7BGB7_MACMU,tr F713J9 F713J9_CALJ A | IkVG LQV VAV k | 75% | 19.5 | 36.74677 | Ref | -0.15 | -0.33 | -0.04 | -0.16 | -0.15 | -0.03 | -0.12 | 3020  | 2590  | 2480 | 3400  | 3450  | 3040 | 3460  | 3210  | 517.4 | 2065.4 | 4 | 0.0012 | 0.593 |
| 60 kDa heat shock protein, mitochondrial OS=Cricetulus griseus GN=HSPD1 PE=2 SV=1 | 7 CH60_C RIGR,sp P63038 CH60_MOUSE,sp P63039 CH60_RAT,tr E2QUU5 E2QUU5_CANFA,tr F1MUZ9 F1MUZ9_BOVIN,tr F1SMZ7 F1SMZ7_PIG,tr F6Z587 F6Z587_HORSE,tr F7BGB7 F7BGB7_MACMU,tr F713J9 F713J9_CALJ A | ISDG VAVL k    | 95% | 45.6 | 49.97513 | Ref | 0.039 | -0.16 | -0.18 | -0.29 | -0.24 | -0.17 | -0.27 | 12600 | 10400 | 9820 | 10800 | 11100 | 9990 | 11000 | 10200 | 755.5 | 1508.9 | 2 | 0.0039 | 2.574 |

|                                                                                   |                                                                                                                                                                                                                       |                          |     |    |          |     |       |       |       |        |       |       |       |       |       |       |       |       |       |       |       |       |        |   |        |       |
|-----------------------------------------------------------------------------------|-----------------------------------------------------------------------------------------------------------------------------------------------------------------------------------------------------------------------|--------------------------|-----|----|----------|-----|-------|-------|-------|--------|-------|-------|-------|-------|-------|-------|-------|-------|-------|-------|-------|-------|--------|---|--------|-------|
| 60 kDa heat shock protein, mitochondrial OS=Cricetulus griseus GN=HSPD1 PE=2 SV=1 | 7 CH60_C RIGR,sp P63038 CH60_MOUSE,sp P63039 CH60_RAT,tr E2QUU5 E2QUU5_CANFA,tr E2REN7 E2REN7_CANFA,tr F1MUZ9 F1MUZ9_BOVIN,tr F1SMZ7 F1SMZ7_PIG,tr F6Z587 F6Z587_HORSE,tr F7BGB7 F7BGB7_MACMU,tr F713J9 F713J9_CALJ A | nAG<br>VEGS<br>LIVE<br>k | 95% | 63 | 52.45152 | Ref | -0.14 | -0.24 | -0.05 | -0.044 | -0.36 | -0.11 | -0.35 | 9490  | 6810  | 6870  | 8820  | 9770  | 6840  | 8490  | 7170  | 912.5 | 1823   | 2 | 0.0151 | 8.281 |
| 60 kDa heat shock protein, mitochondrial OS=Cricetulus griseus GN=HSPD1 PE=2 SV=1 | 7 CH60_C RIGR,sp P63038 CH60_MOUSE,sp P63039 CH60_RAT,tr E2QUU5 E2QUU5_CANFA,tr E2REN7 E2REN7_CANFA,tr F1MUZ9 F1MUZ9_BOVIN,tr F1SMZ7 F1SMZ7_PIG,tr F6Z587 F6Z587_HORSE,tr F7BGB7 F7BGB7_MACMU,tr F713J9 F713J9_CALJ A | tVIIIE<br>QSW<br>GSPK    | 91% | 46 | 53.18796 | Ref | -0.17 | 0.037 | -0    | -0.49  | 0.004 | -0.35 | -0.24 | 13800 | 10600 | 13200 | 14400 | 11400 | 13900 | 11400 | 12200 | 651.7 | 1952.1 | 3 | 0.0153 | 7.835 |

|                                                                                   |                                                                                                                                                                                                                      |           |     |      |          |     |        |       |       |       |       |       |       |       |       |       |       |       |       |       |       |       |        |   |        |       |
|-----------------------------------------------------------------------------------|----------------------------------------------------------------------------------------------------------------------------------------------------------------------------------------------------------------------|-----------|-----|------|----------|-----|--------|-------|-------|-------|-------|-------|-------|-------|-------|-------|-------|-------|-------|-------|-------|-------|--------|---|--------|-------|
| 60 kDa heat shock protein, mitochondrial OS=Cricetulus griseus GN=HSPD1 PE=2 SV=1 | 7 CH60_C RIGR,sp P63038 CH60_MOUSE,sp P63039 CH60_RAT,tr E2QUU5 E2QUU5_CANFA,tr E2REN7 E2REN7_CANFA,tr F1MUZ9 F1MUZ9_BOVIN,tr F1SMZ7 F1SMZ7_PIG,tr F6Z587 F6Z587_HORSE,tr F7BGB7 F7BGB7_MACMU,tr F713J9 F713J9_CALJA | tVIIIEQSW | 95% | 54.2 | 53.1212  | Ref | -0.006 | -0.16 | -0.01 | -0.32 | -0.17 | -0.3  | -0.15 | 2900  | 2550  | 2480  | 3080  | 2750  | 2650  | 2550  | 2810  | 977.1 | 1952.1 | 2 | 0.0123 | 6.301 |
| 60 kDa heat shock protein, mitochondrial OS=Cricetulus griseus GN=HSPD1 PE=2 SV=1 | 7 CH60_C RIGR,sp P63038 CH60_MOUSE,sp P63039 CH60_RAT,tr E2QUU5 E2QUU5_CANFA,tr E2REN7 E2REN7_CANFA,tr F1MUZ9 F1MUZ9_BOVIN,tr F1SMZ7 F1SMZ7_PIG,tr F6Z587 F6Z587_HORSE,tr F7BGB7 F7BGB7_MACMU,tr F713J9 F713J9_CALJA | vGEVIVTK  | 90% | 39.2 | 49.26569 | Ref | 0.0053 | -0.07 | -0.12 | -0.29 | -0.27 | -0.15 | -0.44 | 37000 | 29100 | 30000 | 32500 | 31700 | 28100 | 32000 | 25900 | 727   | 1451.9 | 2 | 0.0046 | 3.181 |



|                                                                                   |                                                                                                                                                                                                                       |                 |     |      |          |     |        |       |       |       |       |       |       |       |       |       |       |       |       |       |       |       |      |   |        |       |
|-----------------------------------------------------------------------------------|-----------------------------------------------------------------------------------------------------------------------------------------------------------------------------------------------------------------------|-----------------|-----|------|----------|-----|--------|-------|-------|-------|-------|-------|-------|-------|-------|-------|-------|-------|-------|-------|-------|-------|------|---|--------|-------|
| 60 kDa heat shock protein, mitochondrial OS=Cricetulus griseus GN=HSPD1 PE=2 SV=1 | 7 CH60_C RIGR,sp P63038 CH60_MOUSE,sp P63039 CH60_RAT,tr E2QUU5 E2QUU5_CANFA,tr E2REN7 E2REN7_CANFA,tr F1MUZ9 F1MUZ9_BOVIN,tr F1SMZ7 F1SMZ7_PIG,tr F6Z587 F6Z587_HORSE,tr F7BGB7 F7BGB7_MACMU,tr F713J9 F713J9_CALJ A | VGG TSDV EVN Ek | 95% | 55.8 | 53.49526 | Ref | 0.04   | -0.21 | 0.059 | -0.23 | -0.41 | -0.14 | -0.37 | 11600 | 9760  | 8900  | 12100 | 10900 | 8390  | 10600 | 8900  | 921.5 | 1841 | 2 | 0.0095 | 5.152 |
| 60 kDa heat shock protein, mitochondrial OS=Cricetulus griseus GN=HSPD1 PE=2 SV=1 | 7 CH60_C RIGR,sp P63038 CH60_MOUSE,sp P63039 CH60_RAT,tr E2QUU5 E2QUU5_CANFA,tr E2REN7 E2REN7_CANFA,tr F1MUZ9 F1MUZ9_BOVIN,tr F1SMZ7 F1SMZ7_PIG,tr F6Z587 F6Z587_HORSE,tr F7BGB7 F7BGB7_MACMU,tr F713J9 F713J9_CALJ A | VGL QVV AVk     | 62% | 25.2 | 43.83869 | Ref | -0.022 | -0.16 | -0.08 | -0.27 | -0.2  | -0.12 | -0.2  | 12200 | 10900 | 10800 | 12800 | 12300 | 11300 | 12500 | 11700 | 507.7 | 1520 | 3 | 0.0016 | 1.038 |

|                                                                                   |                                                                                                                                                                                                                       |             |     |      |          |     |       |       |       |       |       |       |       |       |       |       |       |       |       |       |       |       |      |   |        |       |
|-----------------------------------------------------------------------------------|-----------------------------------------------------------------------------------------------------------------------------------------------------------------------------------------------------------------------|-------------|-----|------|----------|-----|-------|-------|-------|-------|-------|-------|-------|-------|-------|-------|-------|-------|-------|-------|-------|-------|------|---|--------|-------|
| 60 kDa heat shock protein, mitochondrial OS=Cricetulus griseus GN=HSPD1 PE=2 SV=1 | 7 CH60_C RIGR,sp P63038 CH60_MOUSE,sp P63039 CH60_RAT,tr E2QUU5 E2QUU5_CANFA,tr E2REN7 E2REN7_CANFA,tr F1MUZ9 F1MUZ9_BOVIN,tr F1SMZ7 F1SMZ7_PIG,tr F6Z587 F6Z587_HORSE,tr F7BGB7 F7BGB7_MACMU,tr F713J9 F713J9_CALJ A | VGL QVV AVk | 93% | 37.8 | 44.84983 | Ref | 0.038 | -0.19 | -0.12 | -0.24 | -0.36 | 0.005 | -0.18 | 10400 | 9830  | 9130  | 10700 | 10900 | 8730  | 11800 | 10300 | 761   | 1520 | 2 | 0.0078 | 5.123 |
| 60 kDa heat shock protein, mitochondrial OS=Cricetulus griseus GN=HSPD1 PE=2 SV=1 | 7 CH60_C RIGR,sp P63038 CH60_MOUSE,sp P63039 CH60_RAT,tr E2QUU5 E2QUU5_CANFA,tr E2REN7 E2REN7_CANFA,tr F1MUZ9 F1MUZ9_BOVIN,tr F1SMZ7 F1SMZ7_PIG,tr F6Z587 F6Z587_HORSE,tr F7BGB7 F7BGB7_MACMU,tr F713J9 F713J9_CALJ A | VGL QVV AVk | 80% | 30.2 | 44.00987 | Ref | 0.06  | -0.24 | -0.06 | -0.26 | -0.31 | -0.09 | -0.3  | 14500 | 12600 | 11100 | 14200 | 13600 | 11500 | 13900 | 11900 | 507.7 | 1520 | 3 | 0.0027 | 1.768 |

|                                                        |                                              |                                         |     |      |          |     |       |       |       |        |       |       |       |       |       |       |       |       |       |       |       |       |        |   |        |       |
|--------------------------------------------------------|----------------------------------------------|-----------------------------------------|-----|------|----------|-----|-------|-------|-------|--------|-------|-------|-------|-------|-------|-------|-------|-------|-------|-------|-------|-------|--------|---|--------|-------|
| Alpha-enolase<br>OS=Bos taurus<br>GN=ENO1 PE=1<br>SV=4 | sp Q9XSJ4 ENOA_BOVIN, tr F1MB08 F1MB08_BOVIN | aAVP<br>SGAS<br>TGIY<br>EALE<br>LR      | 95% | 48.8 | 54.15155 | Ref | 0.062 | 0.1   | -0.17 | 0.014  | 0.063 | -0.07 | -0.37 | 3240  | 3040  | 3390  | 3160  | 3950  | 3570  | 3400  | 2740  | 1055  | 2108.1 | 2 | 0.0151 | 7.166 |
| Alpha-enolase<br>OS=Bos taurus<br>GN=ENO1 PE=1<br>SV=4 | sp Q9XSJ4 ENOA_BOVIN, tr F1MB08 F1MB08_BOVIN | aAVP<br>SGAS<br>TGIY<br>EALE<br>LR      | 95% | 70.8 | 54.15476 | Ref | 0.22  | 0.39  | -0.24 | -0.27  | -0.15 | -0.05 | -0.11 | 1420  | 1750  | 2140  | 1550  | 1670  | 1590  | 1790  | 1690  | 703.7 | 2108.1 | 3 | 0.0152 | 7.226 |
| Alpha-enolase<br>OS=Bos taurus<br>GN=ENO1 PE=1<br>SV=4 | sp Q9XSJ4 ENOA_BOVIN, tr F1MB08 F1MB08_BOVIN | aVEH<br>INK                             | 65% | 32.5 | 50.76393 | Ref | 0.13  | 0.12  | -0.24 | -0.077 | -0.2  | 0.22  | -0.33 | 9030  | 9090  | 9800  | 8580  | 10600 | 8450  | 11900 | 8040  | 709.9 | 1417.8 | 2 | 0.0074 | 5.232 |
| Alpha-enolase<br>OS=Bos taurus<br>GN=ENO1 PE=1<br>SV=4 | sp Q9XSJ4 ENOA_BOVIN, tr F1MB08 F1MB08_BOVIN | dAT<br>NVG<br>DEG<br>GFA<br>PNIL<br>ENK | 95% | 80.1 | 54.8605  | Ref | -0.18 | 0.069 | -0.25 | 0.12   | -0.27 | 0.029 | -0.36 | 6060  | 3680  | 4730  | 4260  | 6070  | 4050  | 5200  | 3930  | 857.1 | 2568.3 | 3 | 0.0205 | 7.982 |
| Alpha-enolase<br>OS=Bos taurus<br>GN=ENO1 PE=1<br>SV=4 | sp Q9XSJ4 ENOA_BOVIN, tr F1MB08 F1MB08_BOVIN | eALE<br>LLk                             | 74% | 32.7 | 49.00143 | Ref | 0.18  | 0.12  | -0.17 | -0.2   | -0.25 | 0.13  | -0.61 | 48700 | 40300 | 42100 | 38500 | 41600 | 35100 | 47800 | 28300 | 712.5 | 1422.9 | 2 | 0.0051 | 3.589 |
| Alpha-enolase<br>OS=Bos taurus<br>GN=ENO1 PE=1<br>SV=4 | sp Q9XSJ4 ENOA_BOVIN, tr F1MB08 F1MB08_BOVIN | fGA<br>NAIL<br>GVSL<br>AVck             | 95% | 58.7 | 54.19308 | Ref | 0.073 | -0.04 | -0.17 | -0.059 | -0.34 | 0.37  | -0.42 | 1240  | 1070  | 1070  | 1100  | 1310  | 939   | 1610  | 922   | 706.4 | 2116.2 | 3 | 0.0219 | 10.35 |
| Alpha-enolase<br>OS=Bos taurus<br>GN=ENO1 PE=1<br>SV=4 | sp Q9XSJ4 ENOA_BOVIN, tr F1MB08 F1MB08_BOVIN | fGA<br>NAIL<br>GVSL<br>AVck             | 95% | 53   | 53.97222 | Ref | 0.3   | 0.16  | -0.21 | -0.2   | -0.46 | 0.1   | -0.56 | 502   | 449   | 442   | 384   | 425   | 312   | 480   | 302   | 706.4 | 2116.2 | 3 | 0.0118 | 5.586 |

|                                                        |                                              |                                         |     |      |          |     |       |       |       |        |       |       |       |       |       |       |       |       |       |       |       |       |        |   |        |       |
|--------------------------------------------------------|----------------------------------------------|-----------------------------------------|-----|------|----------|-----|-------|-------|-------|--------|-------|-------|-------|-------|-------|-------|-------|-------|-------|-------|-------|-------|--------|---|--------|-------|
| Alpha-enolase<br>OS=Bos taurus<br>GN=ENO1 PE=1<br>SV=4 | sp Q9XSL4 ENOA_BOVIN, tr F1MB08 F1MB08_BOVIN | fGA<br>NAIL<br>GVSL<br>AVck             | 90% | 45.8 | 54.02721 | Ref | 0.33  | 0.093 | -0.09 | -0.089 | -0.28 | -0.06 | -0.53 | 315   | 318   | 293   | 290   | 320   | 245   | 298   | 213   | 706.4 | 2116.2 | 3 | 0.0144 | 6.805 |
| Alpha-enolase<br>OS=Bos taurus<br>GN=ENO1 PE=1<br>SV=4 | sp Q9XSL4 ENOA_BOVIN, tr F1MB08 F1MB08_BOVIN | fTAS<br>AGIQ<br>VVG<br>DDL<br>VTN<br>Pk | 92% | 49.6 | 54.60375 | Ref | 0.093 | 0.21  | 0.17  | -0.37  | -0.38 | 0.11  | -0.34 | 3460  | 3230  | 3800  | 4160  | 3150  | 2730  | 4010  | 2910  | 881.2 | 2640.4 | 3 | 0.0228 | 8.634 |
| Alpha-enolase<br>OS=Bos taurus<br>GN=ENO1 PE=1<br>SV=4 | sp Q9XSL4 ENOA_BOVIN, tr F1MB08 F1MB08_BOVIN | gNPT<br>VEV<br>DLFT<br>Ak               | 95% | 73.3 | 53.622   | Ref | 0.023 | 0.063 | -0.22 | -0.067 | -0.12 | 0.21  | -0.49 | 4790  | 3860  | 4310  | 3980  | 4870  | 4090  | 5390  | 3280  | 1000  | 1998.1 | 2 | 0.0216 | 10.79 |
| Alpha-enolase<br>OS=Bos taurus<br>GN=ENO1 PE=1<br>SV=4 | sp Q9XSL4 ENOA_BOVIN, tr F1MB08 F1MB08_BOVIN | gNPT<br>VEV<br>DLFT<br>Ak               | 83% | 41   | 53.48247 | Ref | -0.21 | 0.35  | -0.32 | -0.11  | -0.12 | 0.094 | -0.42 | 1E+05 | 67100 | 1E+05 | 75500 | 96200 | 83900 | 1E+05 | 70300 | 667   | 1998.1 | 3 | 0.0157 | 7.871 |
| Alpha-enolase<br>OS=Bos taurus<br>GN=ENO1 PE=1<br>SV=4 | sp Q9XSL4 ENOA_BOVIN, tr F1MB08 F1MB08_BOVIN | gNPT<br>VEV<br>DLFT<br>Ak               | 63% | 34.9 | 53.25243 | Ref | -0.17 | -0.11 | -0.1  | -0.11  | 0.059 | 0.044 | -0.08 | 3950  | 2890  | 3260  | 3670  | 4040  | 3960  | 4090  | 3740  | 667   | 1998.1 | 3 | 0.0049 | 2.469 |
| Alpha-enolase<br>OS=Bos taurus<br>GN=ENO1 PE=1<br>SV=4 | sp Q9XSL4 ENOA_BOVIN, tr F1MB08 F1MB08_BOVIN | gNPT<br>VEV<br>DLFT<br>Ak               | 53% | 33.3 | 53.34448 | Ref | 0.27  | -0.28 | 0.018 | -0.19  | -0.11 | 0.18  | -0.16 | 292   | 344   | 255   | 353   | 336   | 311   | 396   | 312   | 667   | 1998.1 | 3 | 0.0073 | 3.654 |
| Alpha-enolase<br>OS=Bos taurus<br>GN=ENO1 PE=1<br>SV=4 | sp Q9XSL4 ENOA_BOVIN, tr F1MB08 F1MB08_BOVIN | iGAE<br>VYH<br>NLk                      | 57% | 32.7 | 52.08288 | Ref | 0.056 | 0.16  | -0.05 | -0.12  | -0.46 | 0.23  | -0.25 | 6870  | 6330  | 7380  | 7150  | 7510  | 5180  | 8740  | 6210  | 584.7 | 1751   | 3 | 0.0127 | 7.233 |

|                                                        |                                              |                |     |      |          |     |       |       |       |        |       |      |       |       |       |       |       |       |      |       |       |       |        |   |        |       |
|--------------------------------------------------------|----------------------------------------------|----------------|-----|------|----------|-----|-------|-------|-------|--------|-------|------|-------|-------|-------|-------|-------|-------|------|-------|-------|-------|--------|---|--------|-------|
| Alpha-enolase<br>OS=Bos taurus<br>GN=ENO1 PE=1<br>SV=4 | sp Q9XSJ4 ENOA_BOVIN, tr F1MB08 F1MB08_BOVIN | IAQSnGWGVMVSHR | 53% | 32.7 | 52.81347 | Ref | 0.18  | 0.22  | -0.08 | 0.004  | -0.36 | 0.24 | -0.23 | 2100  | 2990  | 3320  | 3040  | 3550  | 2410 | 3820  | 2740  | 616.3 | 1845.9 | 3 | 0.0108 | 5.846 |
| Alpha-enolase<br>OS=Bos taurus<br>GN=ENO1 PE=1<br>SV=4 | sp Q9XSJ4 ENOA_BOVIN, tr F1MB08 F1MB08_BOVIN | vVIGMDVAASEFYR | 95% | 57.5 | 53.10704 | Ref | 0.15  | 0.012 | -0.21 | -0.013 | -0.39 | 0.3  | -0.35 | 8290  | 8000  | 7890  | 7600  | 9590  | 6450 | 10900 | 6850  | 931   | 1860   | 2 | 0.0188 | 10.09 |
| Alpha-enolase<br>OS=Bos taurus<br>GN=ENO1 PE=1<br>SV=4 | sp Q9XSJ4 ENOA_BOVIN, tr F1MB08 F1MB08_BOVIN | vVIGMDVAASEFYR | 95% | 49.8 | 53.33066 | Ref | 0.091 | 0.13  | -0.19 | 0.036  | -0.36 | 0.22 | -0.57 | 2160  | 1860  | 2070  | 1860  | 2400  | 1590 | 2480  | 1420  | 931   | 1860   | 2 | 0.0097 | 5.229 |
| Alpha-enolase<br>OS=Bos taurus<br>GN=ENO1 PE=1<br>SV=4 | sp Q9XSJ4 ENOA_BOVIN, tr F1MB08 F1MB08_BOVIN | vVIGMDVAASEFYR | 81% | 41   | 54.37075 | Ref | 0.049 | -0.03 | -0.2  | -0.006 | -0.34 | 0.24 | -0.24 | 1300  | 1100  | 1140  | 1130  | 1420  | 985  | 1540  | 1090  | 722.4 | 2164.2 | 3 | 0.0165 | 7.631 |
| Alpha-enolase<br>OS=Bos taurus<br>GN=ENO1 PE=1<br>SV=4 | sp Q9XSJ4 ENOA_BOVIN, tr F1MB08 F1MB08_BOVIN | yITPDELAnLYk   | 80% | 40.5 | 54.11433 | Ref | 0.19  | 0.005 | -0.14 | -0.009 | -0.32 | 0.17 | -0.23 | 10500 | 11200 | 10700 | 10800 | 13100 | 9240 | 13500 | 10200 | 683.7 | 2048.1 | 3 | 0.0116 | 5.647 |
| Alpha-enolase<br>OS=Bos taurus<br>GN=ENO1 PE=1<br>SV=4 | sp Q9XSJ4 ENOA_BOVIN, tr F1MB08 F1MB08_BOVIN | yITPDELAnLYk   | 82% | 41.4 | 54.1152  | Ref | 0.15  | -0.08 | -0.05 | -0.053 | -0.23 | 0.13 | -0.23 | 4470  | 4470  | 4130  | 4730  | 5200  | 4010 | 5400  | 4170  | 683.7 | 2048.1 | 3 | 0.0178 | 8.693 |
| Alpha-enolase<br>OS=Bos taurus<br>GN=ENO1 PE=1<br>SV=4 | sp Q9XSJ4 ENOA_BOVIN, tr F1MB08 F1MB08_BOVIN | yITPDELAnLYk   | 92% | 45.8 | 54.09443 | Ref | 0.17  | 0.045 | -0.06 | -0.078 | -0.21 | 0.21 | -0.55 | 5510  | 5390  | 5380  | 5600  | 6110  | 4870 | 6780  | 3990  | 1025  | 2048.1 | 2 | 0.0123 | 6.001 |

|                                                                              |                                                                                                                                                                                                                                                                                                                             |             |     |      |          |     |       |      |       |        |      |       |       |       |        |       |        |        |       |       |        |       |        |   |        |       |
|------------------------------------------------------------------------------|-----------------------------------------------------------------------------------------------------------------------------------------------------------------------------------------------------------------------------------------------------------------------------------------------------------------------------|-------------|-----|------|----------|-----|-------|------|-------|--------|------|-------|-------|-------|--------|-------|--------|--------|-------|-------|--------|-------|--------|---|--------|-------|
| Myosin regulatory light chain 12B<br>OS=Bos taurus<br>GN=MYL12B PE=2<br>SV=1 | ML12B_<br>BOVIN,sp<br> O14950 <br>ML12B_H<br>UMAN,sp<br> P18666 <br>ML12B_R<br>AT,sp P19<br>105 ML1<br>2A_HUM<br>AN,sp Q3<br>THE2 ML<br>12B_MOU<br>SE,sp Q5E<br>9E2 MYL9<br>_BOVIN,s<br>p Q5RC3<br>4 ML12A<br>_PONAB,t<br>r B9VH05<br> B9VH05_<br>SHEEP,tr <br>D2HXX5 <br>D2HXX5_<br>AILME,tr <br>D2HXX6 <br>D2HXX6_<br>QNR | eAFn<br>MID | 94% | 43.3 | 49.72767 | Ref | -0.48 | 0.36 | -0.62 | -0.084 | 0.3  | -0.17 | 0.018 | 24400 | 13100  | 25400 | 14500  | 23100  | 26300 | 19900 | 22500  | 771.9 | 1541.7 | 2 | 0.013  | 8.453 |
| Myosin regulatory light chain 12B<br>OS=Bos taurus<br>GN=MYL12B PE=2<br>SV=1 | ML12B_<br>BOVIN,sp<br> O14950 <br>ML12B_H<br>UMAN,sp<br> P18666 <br>ML12B_R<br>AT,sp P19<br>105 ML1<br>2A_HUM<br>AN,sp Q3<br>THE2 ML<br>12B_MOU<br>SE,sp Q5E<br>9E2 MYL9<br>_BOVIN,s<br>p Q5RC3<br>4 ML12A<br>_PONAB,t<br>r B9VH05<br> B9VH05_<br>SHEEP,tr <br>D2HXX5 <br>D2HXX5_<br>AILME,tr <br>D2HXX6 <br>D2HXX6_<br>DR  | eLLT<br>TMG | 74% | 34.8 | 51.05231 | Ref | -0.45 | 0.49 | -0.41 | 0.085  | 0.12 | -0.28 | -0.1  | 3E+05 | 177000 | 4E+05 | 223000 | 346000 | 3E+05 | 2E+05 | 276000 | 670.4 | 1338.7 | 2 | 0.0094 | 7.003 |

|                                                                                 |                                                                                                                                                                                                                                                                                                                             |              |     |      |          |     |       |      |       |      |      |       |       |       |       |       |       |       |       |       |       |       |        |   |        |       |
|---------------------------------------------------------------------------------|-----------------------------------------------------------------------------------------------------------------------------------------------------------------------------------------------------------------------------------------------------------------------------------------------------------------------------|--------------|-----|------|----------|-----|-------|------|-------|------|------|-------|-------|-------|-------|-------|-------|-------|-------|-------|-------|-------|--------|---|--------|-------|
| Myosin regulatory<br>light chain 12B<br>OS=Bos taurus<br>GN=MYL12B PE=2<br>SV=1 | ML12B_<br>BOVIN,sp<br> O14950 <br>ML12B_H<br>UMAN,sp<br> P18666 <br>ML12B_R<br>AT,sp P19<br>105 ML1<br>2A_HUM<br>AN,sp Q3<br>THE2 ML<br>12B_MOU<br>SE,sp Q5E<br>9E2 MYL9<br>_BOVIN,s<br>p Q5RC3<br>4 ML12A<br>_PONAB,t<br>r B9VH05<br> B9VH05_<br>SHEEP,tr <br>D2HKK5 <br>D2HKK5_<br>AILME,tr <br>D2HKK6 <br>D2HKK6_<br>LYR | fTDE<br>EVDE | 95% | 56.5 | 50.15419 | Ref | -0.67 | 0.33 | -0.59 | 0.2  | 0.33 | -0.27 | 0.1   | 42600 | 22700 | 49200 | 29300 | 55600 | 53000 | 36500 | 47000 | 860.4 | 1718.8 | 2 | 0.014  | 8.148 |
| Myosin regulatory<br>light chain 12B<br>OS=Bos taurus<br>GN=MYL12B PE=2<br>SV=1 | ML12B_<br>BOVIN,sp<br> O14950 <br>ML12B_H<br>UMAN,sp<br> P18666 <br>ML12B_R<br>AT,sp P19<br>105 ML1<br>2A_HUM<br>AN,sp Q3<br>THE2 ML<br>12B_MOU<br>SE,sp Q5E<br>9E2 MYL9<br>_BOVIN,s<br>p Q5RC3<br>4 ML12A<br>_PONAB,t<br>r B9VH05<br> B9VH05_<br>SHEEP,tr <br>D2HKK5 <br>D2HKK5_<br>AILME,tr <br>D2HKK6 <br>D2HKK6_<br>LYR | fTDE<br>EVDE | 95% | 47.2 | 50.21243 | Ref | -0.54 | 0.4  | -0.51 | 0.13 | 0.38 | -0.43 | 0.082 | 20500 | 12600 | 26200 | 15700 | 26900 | 28000 | 16700 | 23600 | 860.4 | 1718.8 | 2 | 0.0133 | 7.717 |

|                                                                                 |                                                                                                                                                                                                                                                                                                                             |              |     |      |          |     |       |      |       |        |      |       |       |       |       |       |       |       |       |       |       |       |        |   |        |       |
|---------------------------------------------------------------------------------|-----------------------------------------------------------------------------------------------------------------------------------------------------------------------------------------------------------------------------------------------------------------------------------------------------------------------------|--------------|-----|------|----------|-----|-------|------|-------|--------|------|-------|-------|-------|-------|-------|-------|-------|-------|-------|-------|-------|--------|---|--------|-------|
| Myosin regulatory<br>light chain 12B<br>OS=Bos taurus<br>GN=MYL12B PE=2<br>SV=1 | ML12B_<br>BOVIN,sp<br> O14950 <br>ML12B_H<br>UMAN,sp<br> P18666 <br>ML12B_R<br>AT,sp P19<br>105 ML1<br>2A_HUM<br>AN,sp Q3<br>THE2 ML<br>12B_MOU<br>SE,sp Q5E<br>9E2 MYL9<br>_BOVIN,s<br>p Q5RC3<br>4 ML12A<br>_PONAB,t<br>r B9VH05<br> B9VH05_<br>SHEEP,tr <br>D2HXX5 <br>D2HXX5_<br>AILME,tr <br>D2HXX6 <br>D2HXX6_<br>LYR | fTDE<br>EVDE | 94% | 46.8 | 50.29408 | Ref | -0.21 | 0.17 | -0.45 | -0.075 | 0.36 | -0.24 | -0.11 | 8810  | 5690  | 8020  | 5850  | 8390  | 9890  | 6820  | 7390  | 573.9 | 1718.8 | 3 | 0.0106 | 6.162 |
| Myosin regulatory<br>light chain 12B<br>OS=Bos taurus<br>GN=MYL12B PE=2<br>SV=1 | ML12B_<br>BOVIN,sp<br> O14950 <br>ML12B_H<br>UMAN,sp<br> P18666 <br>ML12B_R<br>AT,sp P19<br>105 ML1<br>2A_HUM<br>AN,sp Q3<br>THE2 ML<br>12B_MOU<br>SE,sp Q5E<br>9E2 MYL9<br>_BOVIN,s<br>p Q5RC3<br>4 ML12A<br>_PONAB,t<br>r B9VH05<br> B9VH05_<br>SHEEP,tr <br>D2HXX5 <br>D2HXX5_<br>AILME,tr <br>D2HXX6 <br>D2HXX6_<br>LYR | fTDE<br>EVDE | 95% | 58.2 | 50.35302 | Ref | -0.91 | 0.34 | -0.67 | 0.3    | 0.4  | -0.42 | -0.07 | 42200 | 16200 | 41800 | 23300 | 50300 | 47100 | 27900 | 35300 | 860.4 | 1718.8 | 2 | 0.0096 | 5.589 |



|                                                                                 |                                                                                                                                                                                                                                                                                                                             |              |     |      |          |     |       |      |       |       |      |       |       |       |       |       |       |       |       |       |       |       |        |   |        |       |
|---------------------------------------------------------------------------------|-----------------------------------------------------------------------------------------------------------------------------------------------------------------------------------------------------------------------------------------------------------------------------------------------------------------------------|--------------|-----|------|----------|-----|-------|------|-------|-------|------|-------|-------|-------|-------|-------|-------|-------|-------|-------|-------|-------|--------|---|--------|-------|
| Myosin regulatory<br>light chain 12B<br>OS=Bos taurus<br>GN=MYL12B PE=2<br>SV=1 | ML12B_<br>BOVIN,sp<br> O14950 <br>ML12B_H<br>UMAN,sp<br> P18666 <br>ML12B_R<br>AT,sp P19<br>105 ML1<br>2A_HUM<br>AN,sp Q3<br>THE2 ML<br>12B_MOU<br>SE,sp Q5E<br>9E2 MYL9<br>_BOVIN,s<br>p Q5RC3<br>4 ML12A<br>_PONAB,t<br>r B9VH05<br> B9VH05_<br>SHEEP,tr <br>D2HXX5 <br>D2HXX5_<br>AILME,tr <br>D2HXX6 <br>D2HXX6_<br>LYR | fTDE<br>EVDE | 95% | 46.3 | 50.35582 | Ref | -0.29 | 0.37 | -0.5  | 0.056 | 0.25 | -0.29 | 0.022 | 4310  | 3080  | 5250  | 3220  | 5230  | 5230  | 3760  | 4630  | 860.4 | 1718.8 | 2 | 0.0095 | 5.519 |
| Myosin regulatory<br>light chain 12B<br>OS=Bos taurus<br>GN=MYL12B PE=2<br>SV=1 | ML12B_<br>BOVIN,sp<br> O14950 <br>ML12B_H<br>UMAN,sp<br> P18666 <br>ML12B_R<br>AT,sp P19<br>105 ML1<br>2A_HUM<br>AN,sp Q3<br>THE2 ML<br>12B_MOU<br>SE,sp Q5E<br>9E2 MYL9<br>_BOVIN,s<br>p Q5RC3<br>4 ML12A<br>_PONAB,t<br>r B9VH05<br> B9VH05_<br>SHEEP,tr <br>D2HXX5 <br>D2HXX5_<br>AILME,tr <br>D2HXX6 <br>D2HXX6_<br>LYR | fTDE<br>EVDE | 95% | 47.4 | 50.53539 | Ref | -0.59 | 0.37 | -0.49 | 0.084 | 0.34 | -0.52 | 0.083 | 42700 | 21700 | 45700 | 28400 | 46500 | 48400 | 27900 | 42100 | 860.4 | 1718.8 | 2 | 0.0051 | 2.973 |

|                                                                                 |                                                                                                                                                                                                                                                                                                                             |              |     |      |          |     |       |      |       |       |      |       |       |       |       |       |       |       |       |       |       |       |        |   |        |       |
|---------------------------------------------------------------------------------|-----------------------------------------------------------------------------------------------------------------------------------------------------------------------------------------------------------------------------------------------------------------------------------------------------------------------------|--------------|-----|------|----------|-----|-------|------|-------|-------|------|-------|-------|-------|-------|-------|-------|-------|-------|-------|-------|-------|--------|---|--------|-------|
| Myosin regulatory<br>light chain 12B<br>OS=Bos taurus<br>GN=MYL12B PE=2<br>SV=1 | ML12B_<br>BOVIN,sp<br> O14950 <br>ML12B_H<br>UMAN,sp<br> P18666 <br>ML12B_R<br>AT,sp P19<br>105 ML1<br>2A_HUM<br>AN,sp Q3<br>THE2 ML<br>12B_MOU<br>SE,sp Q5E<br>9E2 MYL9<br>_BOVIN,s<br>p Q5RC3<br>4 ML12A<br>_PONAB,t<br>r B9VH05<br> B9VH05_<br>SHEEP,tr <br>D2HXX5 <br>D2HXX5_<br>AILME,tr <br>D2HXX6 <br>D2HXX6_<br>LYR | fTDE<br>EVDE | 95% | 46.1 | 49.8867  | Ref | -0.43 | 0.37 | -0.35 | 0.055 | 0.24 | -0.28 | 0.024 | 6670  | 4270  | 8080  | 5520  | 8040  | 7980  | 5810  | 7120  | 860.4 | 1718.8 | 2 | 0.019  | 11.05 |
| Myosin regulatory<br>light chain 12B<br>OS=Bos taurus<br>GN=MYL12B PE=2<br>SV=1 | ML12B_<br>BOVIN,sp<br> O14950 <br>ML12B_H<br>UMAN,sp<br> P18666 <br>ML12B_R<br>AT,sp P19<br>105 ML1<br>2A_HUM<br>AN,sp Q3<br>THE2 ML<br>12B_MOU<br>SE,sp Q5E<br>9E2 MYL9<br>_BOVIN,s<br>p Q5RC3<br>4 ML12A<br>_PONAB,t<br>r B9VH05<br> B9VH05_<br>SHEEP,tr <br>D2HXX5 <br>D2HXX5_<br>AILME,tr <br>D2HXX6 <br>D2HXX6_<br>FTR | gNF<br>NYIE  | 88% | 39.9 | 51.36689 | Ref | -0.79 | 0.42 | -0.65 | 0.2   | 0.31 | -0.27 | 0.12  | 64100 | 31500 | 79200 | 42400 | 83700 | 78900 | 55300 | 72000 | 782.9 | 1563.8 | 2 | 0.0127 | 8.097 |

|                                                                                 |                                                                                                                                                                                                                                                                                                                             |             |     |      |          |     |       |      |       |       |      |       |      |       |      |       |      |       |       |       |       |       |        |   |        |       |
|---------------------------------------------------------------------------------|-----------------------------------------------------------------------------------------------------------------------------------------------------------------------------------------------------------------------------------------------------------------------------------------------------------------------------|-------------|-----|------|----------|-----|-------|------|-------|-------|------|-------|------|-------|------|-------|------|-------|-------|-------|-------|-------|--------|---|--------|-------|
| Myosin regulatory<br>light chain 12B<br>OS=Bos taurus<br>GN=MYL12B PE=2<br>SV=1 | ML12B_<br>BOVIN,sp<br> O14950 <br>ML12B_H<br>UMAN,sp<br> P18666 <br>ML12B_R<br>AT,sp P19<br>105 ML1<br>2A_HUM<br>AN,sp Q3<br>THE2 ML<br>12B_MOU<br>SE,sp Q5E<br>9E2 MYL9<br>_BOVIN,s<br>p Q5RC3<br>4 ML12A<br>_PONAB,t<br>r B9VH05<br> B9VH05_<br>SHEEP,tr <br>D2HXX5 <br>D2HXX5_<br>AILME,tr <br>D2HXX6 <br>D2HXX6_<br>FTR | gNF<br>NYIE | 82% | 37.4 | 51.409   | Ref | -0.66 | 0.35 | -0.56 | 0.18  | 0.35 | -0.31 | 0.18 | 12700 | 7390 | 16100 | 9630 | 17700 | 17500 | 11500 | 16000 | 782.9 | 1563.8 | 2 | 0.0114 | 7.317 |
| Myosin regulatory<br>light chain 12B<br>OS=Bos taurus<br>GN=MYL12B PE=2<br>SV=1 | ML12B_<br>BOVIN,sp<br> O14950 <br>ML12B_H<br>UMAN,sp<br> P18666 <br>ML12B_R<br>AT,sp P19<br>105 ML1<br>2A_HUM<br>AN,sp Q3<br>THE2 ML<br>12B_MOU<br>SE,sp Q5E<br>9E2 MYL9<br>_BOVIN,s<br>p Q5RC3<br>4 ML12A<br>_PONAB,t<br>r B9VH05<br> B9VH05_<br>SHEEP,tr <br>D2HXX5 <br>D2HXX5_<br>AILME,tr <br>D2HXX6 <br>D2HXX6_<br>FTR | gNF<br>NYIE | 87% | 39.7 | 51.48229 | Ref | -0.53 | 0.32 | -0.59 | 0.062 | 0.35 | -0.18 | 0.14 | 8130  | 4990 | 9770  | 5840 | 10100 | 10800 | 7780  | 9680  | 782.9 | 1563.8 | 2 | 0.0107 | 6.844 |

|                                                                                 |                                                                                                                                                                                                                                                                                                                      |                    |     |      |          |     |       |      |       |       |      |       |      |      |      |       |      |       |       |      |       |       |        |   |        |       |
|---------------------------------------------------------------------------------|----------------------------------------------------------------------------------------------------------------------------------------------------------------------------------------------------------------------------------------------------------------------------------------------------------------------|--------------------|-----|------|----------|-----|-------|------|-------|-------|------|-------|------|------|------|-------|------|-------|-------|------|-------|-------|--------|---|--------|-------|
| Myosin regulatory<br>light chain 12B<br>OS=Bos taurus<br>GN=MYL12B PE=2<br>SV=1 | ML12B_<br>BOVIN,sp<br> O14950 <br>ML12B_H<br>UMAN,sp<br> P18666 <br>ML12B_R<br>AT,sp P19<br>105 ML1<br>2A_HUM<br>AN,sp Q3<br>THE2 ML<br>12B_MOU<br>SE,sp Q5E<br>9E2 MYL9<br>_BOVIN,s<br>p Q5RC3<br>4 ML12A<br>_PONAB,t<br>r B9VH05<br> B9VH05_<br>SHEEP,tr <br>D2HXX5 <br>D2HXX5_<br>AILME,tr <br>D2HXX6 <br>D2HXX6_ | gNF<br>NYIE<br>FTR | 81% | 37.2 | 51.48229 | Ref | -0.48 | 0.25 | -0.4  | 0.087 | 0.23 | -0.18 | 0.15 | 5210 | 3260 | 5880  | 4190 | 6490  | 6250  | 4920 | 6140  | 782.9 | 1563.8 | 2 | 0.0107 | 6.844 |
| Myosin regulatory<br>light chain 12B<br>OS=Bos taurus<br>GN=MYL12B PE=2<br>SV=1 | ML12B_<br>BOVIN,sp<br> O14950 <br>ML12B_H<br>UMAN,sp<br> P18666 <br>ML12B_R<br>AT,sp P19<br>105 ML1<br>2A_HUM<br>AN,sp Q3<br>THE2 ML<br>12B_MOU<br>SE,sp Q5E<br>9E2 MYL9<br>_BOVIN,s<br>p Q5RC3<br>4 ML12A<br>_PONAB,t<br>r B9VH05<br> B9VH05_<br>SHEEP,tr <br>D2HXX5 <br>D2HXX5_<br>AILME,tr <br>D2HXX6 <br>D2HXX6_ | gNF<br>NYIE<br>FTR | 72% | 34.7 | 51.49271 | Ref | -0.47 | 0.35 | -0.45 | 0.11  | 0.24 | -0.36 | 0.17 | 9940 | 6290 | 12000 | 7740 | 12600 | 12000 | 8310 | 11800 | 782.9 | 1563.8 | 2 | 0.0099 | 6.307 |

|                                                                              |                                                                                                                                                                                                                                                                                                                             |             |     |      |          |     |       |      |       |       |      |       |      |       |      |       |       |       |       |       |       |       |        |   |        |       |
|------------------------------------------------------------------------------|-----------------------------------------------------------------------------------------------------------------------------------------------------------------------------------------------------------------------------------------------------------------------------------------------------------------------------|-------------|-----|------|----------|-----|-------|------|-------|-------|------|-------|------|-------|------|-------|-------|-------|-------|-------|-------|-------|--------|---|--------|-------|
| Myosin regulatory light chain 12B<br>OS=Bos taurus<br>GN=MYL12B PE=2<br>SV=1 | ML12B_<br>BOVIN,sp<br> O14950 <br>ML12B_H<br>UMAN,sp<br> P18666 <br>ML12B_R<br>AT,sp P19<br>105 ML1<br>2A_HUM<br>AN,sp Q3<br>THE2 ML<br>12B_MOU<br>SE,sp Q5E<br>9E2 MYL9<br>_BOVIN,s<br>p Q5RC3<br>4 ML12A<br>_PONAB,t<br>r B9VH05<br> B9VH05_<br>SHEEP,tr <br>D2HXX5 <br>D2HXX5_<br>AILME,tr <br>D2HXX6 <br>D2HXX6_<br>FTR | gNF<br>NYIE | 64% | 32.6 | 51.08886 | Ref | -0.5  | 0.29 | -0.33 | 0.078 | 0.26 | -0.18 | 0.15 | 12300 | 8280 | 15500 | 11300 | 16600 | 16400 | 12700 | 15700 | 782.9 | 1563.8 | 2 | 0.0194 | 12.39 |
| Myosin regulatory light chain 12B<br>OS=Bos taurus<br>GN=MYL12B PE=2<br>SV=1 | ML12B_<br>BOVIN,sp<br> O14950 <br>ML12B_H<br>UMAN,sp<br> P18666 <br>ML12B_R<br>AT,sp P19<br>105 ML1<br>2A_HUM<br>AN,sp Q3<br>THE2 ML<br>12B_MOU<br>SE,sp Q5E<br>9E2 MYL9<br>_BOVIN,s<br>p Q5RC3<br>4 ML12A<br>_PONAB,t<br>r B9VH05<br> B9VH05_<br>SHEEP,tr <br>D2HXX5 <br>D2HXX5_<br>AILME,tr <br>D2HXX6 <br>D2HXX6_<br>FTR | gNF<br>NYIE | 67% | 33.3 | 51.30121 | Ref | -0.34 | 0.23 | -0.42 | 0.051 | 0.26 | -0.25 | 0.15 | 5050  | 3540 | 5720  | 4080  | 6230  | 6280  | 4620  | 6050  | 782.9 | 1563.8 | 2 | 0.0142 | 9.107 |

|                                                                              |                                                                                                                                                                                                                                                                                                                             |              |     |      |          |     |       |      |       |       |      |       |      |      |      |      |      |      |      |      |      |       |        |   |        |       |
|------------------------------------------------------------------------------|-----------------------------------------------------------------------------------------------------------------------------------------------------------------------------------------------------------------------------------------------------------------------------------------------------------------------------|--------------|-----|------|----------|-----|-------|------|-------|-------|------|-------|------|------|------|------|------|------|------|------|------|-------|--------|---|--------|-------|
| Myosin regulatory light chain 12B<br>OS=Bos taurus<br>GN=MYL12B PE=2<br>SV=1 | ML12B_<br>BOVIN,sp<br> O14950 <br>ML12B_H<br>UMAN,sp<br> P18666 <br>ML12B_R<br>AT,sp P19<br>105 ML1<br>2A_HUM<br>AN,sp Q3<br>THE2 ML<br>12B_MOU<br>SE,sp Q5E<br>9E2 MYL9<br>_BOVIN,s<br>p Q5RC3<br>4 ML12A<br>_PONAB,t<br>r B9VH05<br> B9VH05_<br>SHEEP,tr <br>D2HXX5 <br>D2HXX5_<br>AILME,tr <br>D2HXX6 <br>D2HXX6_<br>FTR | gNF<br>NYIE  | 64% | 33.1 | 51.67873 | Ref | -0.46 | 0.18 | -0.41 | 0.085 | 0.29 | -0.14 | 0.2  | 2760 | 1880 | 3180 | 2370 | 3680 | 3720 | 2870 | 3600 | 782.9 | 1563.8 | 2 | 0.0042 | 2.716 |
| Myosin regulatory light chain 12B<br>OS=Bos taurus<br>GN=MYL12B PE=2<br>SV=1 | ML12B_<br>BOVIN,sp<br> O14950 <br>ML12B_H<br>UMAN,sp<br> P18666 <br>ML12B_R<br>AT,sp P19<br>105 ML1<br>2A_HUM<br>AN,sp Q3<br>THE2 ML<br>12B_MOU<br>SE,sp Q5E<br>9E2 MYL9<br>_BOVIN,s<br>p Q5RC3<br>4 ML12A<br>_PONAB,t<br>r B9VH05<br> B9VH05_<br>SHEEP,tr <br>D2HXX5 <br>D2HXX5_<br>AILME,tr <br>D2HXX6 <br>D2HXX6_<br>TR  | gNFn<br>YIEF | 72% | 33.6 | 50.47684 | Ref | -0.49 | 0.16 | -0.45 | 0.089 | 0.33 | -0.32 | 0.28 | 7100 | 4470 | 7610 | 5610 | 8960 | 9260 | 6140 | 9270 | 783.4 | 1564.8 | 2 | 0.0184 | 11.75 |

|                                                                                 |                                                                                                                                                                                                                                                                                                                            |              |     |      |          |     |       |      |       |       |      |       |       |       |      |       |       |       |       |       |       |       |        |   |        |       |
|---------------------------------------------------------------------------------|----------------------------------------------------------------------------------------------------------------------------------------------------------------------------------------------------------------------------------------------------------------------------------------------------------------------------|--------------|-----|------|----------|-----|-------|------|-------|-------|------|-------|-------|-------|------|-------|-------|-------|-------|-------|-------|-------|--------|---|--------|-------|
| Myosin regulatory<br>light chain 12B<br>OS=Bos taurus<br>GN=MYL12B PE=2<br>SV=1 | ML12B_<br>BOVIN,sp<br> O14950 <br>ML12B_H<br>UMAN,sp<br> P18666 <br>ML12B_R<br>AT,sp P19<br>105 ML1<br>2A_HUM<br>AN,sp Q3<br>THE2 ML<br>12B_MOU<br>SE,sp Q5E<br>9E2 MYL9<br>_BOVIN,s<br>p Q5RC3<br>4 ML12A<br>_PONAB,t<br>r B9VH05<br> B9VH05_<br>SHEEP,tr <br>D2HXX5 <br>D2HXX5_<br>AILME,tr <br>D2HXX6 <br>D2HXX6_<br>TR | gNFn<br>YIEF | 55% | 30.5 | 50.47668 | Ref | -0.41 | 0.15 | -0.24 | 0.067 | 0.28 | -0.21 | 0.11  | 3740  | 2520 | 4040  | 3450  | 4720  | 4770  | 3540  | 4410  | 783.4 | 1564.8 | 2 | 0.0182 | 11.6  |
| Myosin regulatory<br>light chain 12B<br>OS=Bos taurus<br>GN=MYL12B PE=2<br>SV=1 | ML12B_<br>BOVIN,sp<br> O14950 <br>ML12B_H<br>UMAN,sp<br> P18666 <br>ML12B_R<br>AT,sp P19<br>105 ML1<br>2A_HUM<br>AN,sp Q3<br>THE2 ML<br>12B_MOU<br>SE,sp Q5E<br>9E2 MYL9<br>_BOVIN,s<br>p Q5RC3<br>4 ML12A<br>_PONAB,t<br>r B9VH05<br> B9VH05_<br>SHEEP,tr <br>D2HXX5 <br>D2HXX5_<br>AILME,tr <br>D2HXX6 <br>D2HXX6_<br>TR | gNFn<br>YIEF | 87% | 38.9 | 50.71289 | Ref | -0.44 | 0.28 | -0.5  | 0.13  | 0.24 | -0.25 | 0.078 | 15000 | 9050 | 16200 | 10600 | 18100 | 17000 | 12700 | 15800 | 783.4 | 1564.8 | 2 | 0.0115 | 7.318 |

|                                                                                      |                                                                                                                                                                                                                         |                                     |     |      |          |     |        |       |                            |        |      |       |       |       |       |       |                            |       |       |       |       |       |        |   |        |       |
|--------------------------------------------------------------------------------------|-------------------------------------------------------------------------------------------------------------------------------------------------------------------------------------------------------------------------|-------------------------------------|-----|------|----------|-----|--------|-------|----------------------------|--------|------|-------|-------|-------|-------|-------|----------------------------|-------|-------|-------|-------|-------|--------|---|--------|-------|
| Myosin regulatory light chain 12B<br>OS=Bos taurus<br>GN=MYL12B PE=2<br>SV=1         | ML12B_ BOVIN,sp  O14950  ML12B_H UMAN,sp  P18666  ML12B_R AT,sp P19105 ML12A_HUMAN,sp Q3THE2 ML12B_MOUSE,sp Q5E9E2 MYL9_BOVIN,sp Q5RC34 ML12A_PONAB, tr B9VH05 B9VH05_SHEEP, tr D2HXK5 D2HXK5_AILME, tr D2HXK6 D2HXK6_R | nAFA<br>cFDE<br>EAT<br>GTIQ<br>EDYL | 84% | 37.7 | 49.70333 | Ref | -0.27  | 0.22  | Value Missing (-3.0083933) | -0.025 | 0.25 | 0.32  | 0.007 | 212   | 114   | 174   | Value Missing (-3.0083933) | 181   | 191   | 210   | 168   | 881.7 | 2642.2 | 3 | 0.014  | 5.302 |
| Heterogeneous nuclear ribonucleoprotein K<br>OS=Bos taurus<br>GN=HNRNPK PE=2<br>SV=1 | 0 HNRPK_BOVIN,sp Q4R4M6 HNRPK_MACFA,sp Q5R5H8 HNRPK_PONAB, tr B2M1R6 B2M1R6_MOUSE, tr F6WZ02 F6WZ02_MACMU, tr F6WZ20 F6WZ20_MACMU, tr F7BUQ2 F7BUQ2_MONDO, tr F7BUZ6 F7BUZ6_MONDO, tr F7IK44 F7IK44_CALA, tr Q3TL       | dLAG<br>SIIGK                       | 69% | 33.9 | 51.01537 | Ref | -0.073 | -0.24 | -0.16                      | -0.12  | 0.12 | -0.38 | -0.23 | 33500 | 32200 | 31200 | 36900                      | 41900 | 43100 | 31900 | 35100 | 494.6 | 1480.9 | 3 | 0.0058 | 3.895 |



|                                                                             |                                                                                                                                                                                                                                                 |             |     |      |          |     |      |       |       |       |       |       |       |       |       |       |       |       |       |       |       |       |        |   |        |       |
|-----------------------------------------------------------------------------|-------------------------------------------------------------------------------------------------------------------------------------------------------------------------------------------------------------------------------------------------|-------------|-----|------|----------|-----|------|-------|-------|-------|-------|-------|-------|-------|-------|-------|-------|-------|-------|-------|-------|-------|--------|---|--------|-------|
| Heterogeneous nuclear ribonucleoprotein K OS=Bos taurus GN=HNRNPK PE=2 SV=1 | 0 HNRPK_BOVIN,s<br>p Q4R4M6 HNRPK_MACFA,s<br>p Q5R5H8 HNRPK_PONAB,t<br>r B2M1R6 B2M1R6_MOUSE<br>,tr F6WZ02 F6WZ02_MACM<br>U,tr F6WZ20 F6WZ20_MAC<br>MU,tr F7BUQ2 F7BUQ2_M<br>ONDO,tr F7BUZ6 F7BUZ6_M<br>ONDO,tr F7IK44 F7IK44_CALJ<br>A,tr Q3TL | eNT<br>QTTI | 83% | 38.5 | 51.97818 | Ref | 0.2  | -0.26 | -0.15 | -0.24 | -0.11 | -0.4  | -0.39 | 23200 | 23000 | 18200 | 22000 | 22900 | 21800 | 18600 | 18700 | 771.9 | 1541.9 | 2 | 0.0065 | 4.184 |
|                                                                             | 0 HNRPK_BOVIN,s<br>p Q4R4M6 HNRPK_MACFA,s<br>p Q5R5H8 HNRPK_PONAB,t<br>r B2M1R6 B2M1R6_MOUSE<br>,tr F6WZ02 F6WZ02_MACM<br>U,tr F6WZ20 F6WZ20_MAC<br>MU,tr F7BUQ2 F7BUQ2_M<br>ONDO,tr F7BUZ6 F7BUZ6_M<br>ONDO,tr F7IK44 F7IK44_CALJ<br>A,tr Q3TL | eNT<br>QTTI | 89% | 41.3 | 52.01053 | Ref | 0.17 | -0.27 | -0.11 | -0.3  | -0.09 | -0.46 | -0.24 | 8870  | 8840  | 7070  | 8840  | 8590  | 8630  | 7010  | 8060  | 771.9 | 1541.9 | 2 | 0.0088 | 5.674 |

|                                                                             |                                                                                                                                                                                                                                                 |                                                                                                                                                                                                                                                 |                   |      |          |          |      |       |       |       |       |       |       |       |       |       |       |        |        |       |       |       |        |        |        |        |
|-----------------------------------------------------------------------------|-------------------------------------------------------------------------------------------------------------------------------------------------------------------------------------------------------------------------------------------------|-------------------------------------------------------------------------------------------------------------------------------------------------------------------------------------------------------------------------------------------------|-------------------|------|----------|----------|------|-------|-------|-------|-------|-------|-------|-------|-------|-------|-------|--------|--------|-------|-------|-------|--------|--------|--------|--------|
| Heterogeneous nuclear ribonucleoprotein K OS=Bos taurus GN=HNRNPK PE=2 SV=1 | 0 HNRPK_BOVIN,s<br>p Q4R4M6 HNRPK_MACFA,s<br>p Q5R5H8 HNRPK_PONAB,t<br>r B2M1R6 B2M1R6_MOUSE<br>,tr F6WZ02 F6WZ02_MACM<br>U,tr F6WZ20 F6WZ20_MAC<br>MU,tr F7BUQ2 F7BUQ2_M<br>ONDO,tr F7BUZ6 F7BUZ6_M<br>ONDO,tr F7IK44 F7IK44_CALJ<br>A,tr Q3TL | gGDL<br>MAY<br>DR                                                                                                                                                                                                                               | 85%               | 35.8 | 48.69918 | Ref      | 0.12 | -0.28 | -0.06 | -0.28 | -0.04 | -0.52 | -0.17 | 71400 | 72900 | 60100 | 78400 | 74100  | 76600  | 57000 | 72100 | 651.3 | 1300.6 | 2      | 0.0104 | 7.959  |
|                                                                             | Heterogeneous nuclear ribonucleoprotein K OS=Bos taurus GN=HNRNPK PE=2 SV=1                                                                                                                                                                     | 0 HNRPK_BOVIN,s<br>p Q4R4M6 HNRPK_MACFA,s<br>p Q5R5H8 HNRPK_PONAB,t<br>r B2M1R6 B2M1R6_MOUSE<br>,tr F6WZ02 F6WZ02_MACM<br>U,tr F6WZ20 F6WZ20_MAC<br>MU,tr F7BUQ2 F7BUQ2_M<br>ONDO,tr F7BUZ6 F7BUZ6_M<br>ONDO,tr F7IK44 F7IK44_CALJ<br>A,tr Q3TL | gSDF<br>DcEL<br>R | 95%  | 46.1     | 45.12804 | Ref  | 0.09  | -0.27 | -0.08 | -0.24 | -0.16 | -0.22 | -0.29 | 97800 | 97700 | 82300 | 106000 | 104000 | 96300 | 96300 | 91200 | 696.3  | 1390.6 | 2      | 0.0067 |

|                                                                             |                                                                                                                                                                                                                                                 |                                                                                                                                                                                                                                                 |                     |      |          |          |      |       |       |       |       |       |       |      |       |       |       |       |       |       |       |       |        |        |       |        |
|-----------------------------------------------------------------------------|-------------------------------------------------------------------------------------------------------------------------------------------------------------------------------------------------------------------------------------------------|-------------------------------------------------------------------------------------------------------------------------------------------------------------------------------------------------------------------------------------------------|---------------------|------|----------|----------|------|-------|-------|-------|-------|-------|-------|------|-------|-------|-------|-------|-------|-------|-------|-------|--------|--------|-------|--------|
| Heterogeneous nuclear ribonucleoprotein K OS=Bos taurus GN=HNRNPK PE=2 SV=1 | 0 HNRPK_BOVIN,s<br>p Q4R4M6 HNRPK_MACFA,s<br>p Q5R5H8 HNRPK_PONAB,t<br>r B2M1R6 B2M1R6_MOUSE<br>,tr F6WZ02 F6WZ02_MACM<br>U,tr F6WZ20 F6WZ20_MAC<br>MU,tr F7BUQ2 F7BUQ2_M<br>ONDO,tr F7BUZ6 F7BUZ6_M<br>ONDO,tr F7IK44 F7IK44_CALJ<br>A,tr Q3TL | gSYG<br>DLG<br>GPIIT<br>TQV                                                                                                                                                                                                                     | 95%                 | 49.8 | 53.00776 | Ref      | 0.16 | -0.56 | -0.45 | -0.17 | -0.05 | -0.48 | -0.07 | 748  | 645   | 425   | 512   | 686   | 651   | 504   | 668   | 1263  | 2524.4 | 2      | ##### | 0.375  |
|                                                                             | Heterogeneous nuclear ribonucleoprotein K OS=Bos taurus GN=HNRNPK PE=2 SV=1                                                                                                                                                                     | 0 HNRPK_BOVIN,s<br>p Q4R4M6 HNRPK_MACFA,s<br>p Q5R5H8 HNRPK_PONAB,t<br>r B2M1R6 B2M1R6_MOUSE<br>,tr F6WZ02 F6WZ02_MACM<br>U,tr F6WZ20 F6WZ20_MAC<br>MU,tr F7BUQ2 F7BUQ2_M<br>ONDO,tr F7BUZ6 F7BUZ6_M<br>ONDO,tr F7IK44 F7IK44_CALJ<br>A,tr Q3TL | iDEP<br>LEGS<br>EDR | 73%  | 33.9     | 50.48718 | Ref  | -0.02 | -0.3  | -0.05 | -0.16 | 0.054 | -0.55 | -0.2 | 32200 | 29600 | 26400 | 35200 | 36000 | 36500 | 25100 | 31700 | 782.4  | 1562.8 | 2     | 0.0117 |

|                                                                             |                                                                                                                                                                                                                                                 |                                                                                                                                                                                                                                                 |                      |     |      |         |          |      |       |       |        |                         |       |       |       |      |      |      |      |                            |      |      |       |        |        |        |        |
|-----------------------------------------------------------------------------|-------------------------------------------------------------------------------------------------------------------------------------------------------------------------------------------------------------------------------------------------|-------------------------------------------------------------------------------------------------------------------------------------------------------------------------------------------------------------------------------------------------|----------------------|-----|------|---------|----------|------|-------|-------|--------|-------------------------|-------|-------|-------|------|------|------|------|----------------------------|------|------|-------|--------|--------|--------|--------|
| Heterogeneous nuclear ribonucleoprotein K OS=Bos taurus GN=HNRNPK PE=2 SV=1 | 0 HNRPK_BOVIN,s<br>p Q4R4M6 HNRPK_MACFA,s<br>p Q5R5H8 HNRPK_PONAB,t<br>r B2M1R6 B2M1R6_MOUSE<br>,tr F6WZ02 F6WZ02_MACM<br>U,tr F6WZ20 F6WZ20_MAC<br>MU,tr F7BUQ2 F7BUQ2_M<br>ONDO,tr F7BUZ6 F7BUZ6_M<br>ONDO,tr F7IK44 F7IK44_CALJ<br>A,tr Q3TL | iLSIS<br>ADIE<br>TIGEI                                                                                                                                                                                                                          | Lk                   | 95% | 54.8 | 50.0843 | Ref      | 0.63 | -0.18 | -0.46 | -0.022 | Value Missing (-1.8316) | -0.19 | -0.39 | 162   | 194  | 120  | 111  | 166  | Value Missing (-1.8316469) | 134  | 116  | 775.1 | 2322.4 | 3      | 0.0067 | 2.88   |
|                                                                             | Heterogeneous nuclear ribonucleoprotein K OS=Bos taurus GN=HNRNPK PE=2 SV=1                                                                                                                                                                     | 0 HNRPK_BOVIN,s<br>p Q4R4M6 HNRPK_MACFA,s<br>p Q5R5H8 HNRPK_PONAB,t<br>r B2M1R6 B2M1R6_MOUSE<br>,tr F6WZ02 F6WZ02_MACM<br>U,tr F6WZ20 F6WZ20_MAC<br>MU,tr F7BUQ2 F7BUQ2_M<br>ONDO,tr F7BUZ6 F7BUZ6_M<br>ONDO,tr F7IK44 F7IK44_CALJ<br>A,tr Q3TL | ILIH<br>QSLA<br>GGII | Gvk | 87%  | 34.5    | 46.60999 | Ref  | 0.026 | -0.21 | -0.15  | -0.33                   | -0.2  | -0.24 | -0.23 | 2710 | 2340 | 2160 | 2530 | 2450                       | 2350 | 2380 | 2390  | 532.6  | 2126.3 | 4      | 0.0175 |

|                                                                             |                                                                                                                                                                                                                                                 |                      |     |      |          |     |       |       |       |        |       |       |       |      |      |      |      |      |      |      |      |       |        |   |        |       |
|-----------------------------------------------------------------------------|-------------------------------------------------------------------------------------------------------------------------------------------------------------------------------------------------------------------------------------------------|----------------------|-----|------|----------|-----|-------|-------|-------|--------|-------|-------|-------|------|------|------|------|------|------|------|------|-------|--------|---|--------|-------|
| Heterogeneous nuclear ribonucleoprotein K OS=Bos taurus GN=HNRNPK PE=2 SV=1 | 0 HNRPK_BOVIN,s<br>p Q4R4M6 HNRPK_MACFA,s<br>p Q5R5H8 HNRPK_PONAB,t<br>r B2M1R6 B2M1R6_MOUSE<br>,tr F6WZ02 F6WZ02_MACM<br>U,tr F6WZ20 F6WZ20_MAC<br>MU,tr F7BUQ2 F7BUQ2_M<br>ONDO,tr F7BUZ6 F7BUZ6_M<br>ONDO,tr F7IK44 F7IK44_CALJ<br>A,tr Q3TL | ILIH<br>QSLA<br>GGII | 95% | 60.5 | 46.36187 | Ref | 0.22  | -0.34 | -0.22 | -0.13  | -0.13 | -0.34 | -0.11 | 1720 | 2130 | 1570 | 1910 | 2250 | 1960 | 1760 | 2060 | 709.8 | 2126.3 | 3 | 0.0145 | 6.798 |
|                                                                             | 0 HNRPK_BOVIN,s<br>p Q4R4M6 HNRPK_MACFA,s<br>p Q5R5H8 HNRPK_PONAB,t<br>r B2M1R6 B2M1R6_MOUSE<br>,tr F6WZ02 F6WZ02_MACM<br>U,tr F6WZ20 F6WZ20_MAC<br>MU,tr F7BUQ2 F7BUQ2_M<br>ONDO,tr F7BUZ6 F7BUZ6_M<br>ONDO,tr F7IK44 F7IK44_CALJ<br>A,tr Q3TL | ILIH<br>QSLA<br>GGII | 90% | 34.9 | 45.1403  | Ref | -0.03 | -0.37 | -0.15 | -0.041 | -0.28 | -0.12 | -0.28 | 820  | 700  | 601  | 782  | 932  | 688  | 803  | 714  | 532.6 | 2126.3 | 4 | 0.0045 | 2.119 |

|                                                                             |                                                                                                                                                                                                                                                 |                                                                                                                                                                                                                                                 |             |      |          |          |       |       |       |       |       |       |       |       |       |       |       |       |       |       |       |       |        |        |        |        |
|-----------------------------------------------------------------------------|-------------------------------------------------------------------------------------------------------------------------------------------------------------------------------------------------------------------------------------------------|-------------------------------------------------------------------------------------------------------------------------------------------------------------------------------------------------------------------------------------------------|-------------|------|----------|----------|-------|-------|-------|-------|-------|-------|-------|-------|-------|-------|-------|-------|-------|-------|-------|-------|--------|--------|--------|--------|
| Heterogeneous nuclear ribonucleoprotein K OS=Bos taurus GN=HNRNPK PE=2 SV=1 | 0 HNRPK_BOVIN,s<br>p Q4R4M6 HNRPK_MACFA,s<br>p Q5R5H8 HNRPK_PONAB,t<br>r B2M1R6 B2M1R6_MOUSE<br>,tr F6WZ02 F6WZ02_MACM<br>U,tr F6WZ20 F6WZ20_MAC<br>MU,tr F7BUQ2 F7BUQ2_M<br>ONDO,tr F7BUZ6 F7BUZ6_M<br>ONDO,tr F7IK44 F7IK44_CALJ<br>A,tr Q3TL | ILIH<br>QSLA<br>GGII                                                                                                                                                                                                                            | 93%         | 41.2 | 45.14016 | Ref      | 0.035 | -0.49 | -0.06 | -0.24 | -0.23 | -0.15 | -0.21 | 715   | 624   | 471   | 713   | 690   | 606   | 674   | 640   | 709.8 | 2126.3 | 3      | 0.0038 | 1.806  |
|                                                                             | Heterogeneous nuclear ribonucleoprotein K OS=Bos taurus GN=HNRNPK PE=2 SV=1                                                                                                                                                                     | 0 HNRPK_BOVIN,s<br>p Q4R4M6 HNRPK_MACFA,s<br>p Q5R5H8 HNRPK_PONAB,t<br>r B2M1R6 B2M1R6_MOUSE<br>,tr F6WZ02 F6WZ02_MACM<br>U,tr F6WZ20 F6WZ20_MAC<br>MU,tr F7BUQ2 F7BUQ2_M<br>ONDO,tr F7BUZ6 F7BUZ6_M<br>ONDO,tr F7IK44 F7IK44_CALJ<br>A,tr Q3TL | nAG<br>AVIG | 77%  | 33.3     | 49.01856 | Ref   | -0.09 | -0.29 | -0.17 | -0.28 | -0.09 | -0.37 | -0.05 | 24300 | 19200 | 18200 | 22100 | 22600 | 22500 | 19400 | 24100 | 669.4  | 1336.8 | 2      | 0.0014 |

|                                                                             |                                                                                                                                                                                                                                                 |                                                                                                                                                                                                                                                 |              |      |          |         |       |        |       |       |       |       |       |       |       |       |       |       |       |       |       |       |        |        |        |        |
|-----------------------------------------------------------------------------|-------------------------------------------------------------------------------------------------------------------------------------------------------------------------------------------------------------------------------------------------|-------------------------------------------------------------------------------------------------------------------------------------------------------------------------------------------------------------------------------------------------|--------------|------|----------|---------|-------|--------|-------|-------|-------|-------|-------|-------|-------|-------|-------|-------|-------|-------|-------|-------|--------|--------|--------|--------|
| Heterogeneous nuclear ribonucleoprotein K OS=Bos taurus GN=HNRNPK PE=2 SV=1 | 0 HNRPK_BOVIN,s<br>p Q4R4M6 HNRPK_MACFA,s<br>p Q5R5H8 HNRPK_PONAB,t<br>r B2M1R6 B2M1R6_MOUSE<br>,tr F6WZ02 F6WZ02_MACM<br>U,tr F6WZ20 F6WZ20_MAC<br>MU,tr F7BUQ2 F7BUQ2_M<br>ONDO,tr F7BUZ6 F7BUZ6_M<br>ONDO,tr F7IK44 F7IK44_CALJ<br>A,tr Q3TL | nLPL<br>PPPP                                                                                                                                                                                                                                    | 95%          | 46.9 | 51.23329 | Ref     | 0.058 | -0.26  | -0.17 | -0.25 | -0.3  | -0.13 | -0.19 | 15700 | 14600 | 12700 | 15200 | 15800 | 13400 | 15700 | 15000 | 749.9 | 1497.9 | 2      | 0.0141 | 9.426  |
|                                                                             | Heterogeneous nuclear ribonucleoprotein K OS=Bos taurus GN=HNRNPK PE=2 SV=1                                                                                                                                                                     | 0 HNRPK_BOVIN,s<br>p Q4R4M6 HNRPK_MACFA,s<br>p Q5R5H8 HNRPK_PONAB,t<br>r B2M1R6 B2M1R6_MOUSE<br>,tr F6WZ02 F6WZ02_MACM<br>U,tr F6WZ20 F6WZ20_MAC<br>MU,tr F7BUQ2 F7BUQ2_M<br>ONDO,tr F7BUZ6 F7BUZ6_M<br>ONDO,tr F7IK44 F7IK44_CALJ<br>A,tr Q3TL | nLPL<br>PPPP | 83%  | 37.6     | 51.2237 | Ref   | -0.077 | -0.27 | -0.23 | -0.16 | -0.29 | -0.1  | -0.27 | 26200 | 20100 | 19200 | 22000 | 25500 | 20400 | 24300 | 21500 | 750    | 1497.9 | 2      | 0.0118 |

|                                                                             |                                                                                                                                                                                                                                                 |                                                                                                                                                                                                                                                 |                  |      |          |          |       |        |       |       |       |       |       |       |       |       |        |        |       |       |        |       |        |        |        |       |
|-----------------------------------------------------------------------------|-------------------------------------------------------------------------------------------------------------------------------------------------------------------------------------------------------------------------------------------------|-------------------------------------------------------------------------------------------------------------------------------------------------------------------------------------------------------------------------------------------------|------------------|------|----------|----------|-------|--------|-------|-------|-------|-------|-------|-------|-------|-------|--------|--------|-------|-------|--------|-------|--------|--------|--------|-------|
| Heterogeneous nuclear ribonucleoprotein K OS=Bos taurus GN=HNRNPK PE=2 SV=1 | 0 HNRPK_BOVIN,s<br>p Q4R4M6 HNRPK_MACFA,s<br>p Q5R5H8 HNRPK_PONAB,t<br>r B2M1R6 B2M1R6_MOUSE<br>,tr F6WZ02 F6WZ02_MACM<br>U,tr F6WZ20 F6WZ20_MAC<br>MU,tr F7BUQ2 F7BUQ2_M<br>ONDO,tr F7BUZ6 F7BUZ6_M<br>ONDO,tr F7IK44 F7IK44_CALJ<br>A,tr Q3TL | nTDE<br>MVE<br>LR                                                                                                                                                                                                                               | 87%              | 38.7 | 50.56966 | Ref      | -0.01 | -0.41  | -0.02 | -0.29 | -0.2  | -0.36 | 0.027 | 1E+05 | 92900 | 76500 | 113000 | 103000 | 95500 | 89400 | 116000 | 705.9 | 1409.7 | 2      | 0.0093 | 6.559 |
|                                                                             | Heterogeneous nuclear ribonucleoprotein K OS=Bos taurus GN=HNRNPK PE=2 SV=1                                                                                                                                                                     | 0 HNRPK_BOVIN,s<br>p Q4R4M6 HNRPK_MACFA,s<br>p Q5R5H8 HNRPK_PONAB,t<br>r B2M1R6 B2M1R6_MOUSE<br>,tr F6WZ02 F6WZ02_MACM<br>U,tr F6WZ20 F6WZ20_MAC<br>MU,tr F7BUQ2 F7BUQ2_M<br>ONDO,tr F7BUZ6 F7BUZ6_M<br>ONDO,tr F7IK44 F7IK44_CALJ<br>A,tr Q3TL | qYA<br>DVE<br>GF | 95%  | 55.9     | 48.47468 | Ref   | -0.076 | -0.28 | -0.34 | -0.28 | -0.03 | -0.09 | -0.42 | 408   | 299   | 280    | 303    | 348   | 361   | 363    | 286   | 616.8  | 1231.6 | 2      | 0.01  |



|                                                                             |                                                                                                                                                                                                                                                 |            |     |      |          |     |       |                            |       |       |       |       |       |      |      |                            |      |      |      |      |      |       |        |   |        |       |
|-----------------------------------------------------------------------------|-------------------------------------------------------------------------------------------------------------------------------------------------------------------------------------------------------------------------------------------------|------------|-----|------|----------|-----|-------|----------------------------|-------|-------|-------|-------|-------|------|------|----------------------------|------|------|------|------|------|-------|--------|---|--------|-------|
| Heterogeneous nuclear ribonucleoprotein K OS=Bos taurus GN=HNRNPK PE=2 SV=1 | 0 HNRPK_BOVIN,s<br>p Q4R4M6 HNRPK_MACFA,s<br>p Q5R5H8 HNRPK_PONAB,t<br>r B2M1R6 B2M1R6_MOUSE<br>,tr F6WZ02 F6WZ02_MACM<br>U,tr F6WZ20 F6WZ20_MAC<br>MU,tr F7BUQ2 F7BUQ2_M<br>ONDO,tr F7BUZ6 F7BUZ6_M<br>ONDO,tr F7IK44 F7IK44_CALJ<br>A,tr Q3TL | qYA<br>DVE | 95% | 56.3 | 48.2893  | Ref | -0.07 | Value Missing (-1.3238099) | 0.05  | -0.32 | 0.32  | -0.24 | -0.24 | 1830 | 1440 | Value Missing (-1.3238099) | 1910 | 1630 | 2220 | 1570 | 1560 | 616.8 | 1231.6 | 2 | 0.0133 | 10.78 |
|                                                                             | 0 HNRPK_BOVIN,s<br>p Q4R4M6 HNRPK_MACFA,s<br>p Q5R5H8 HNRPK_PONAB,t<br>r B2M1R6 B2M1R6_MOUSE<br>,tr F6WZ02 F6WZ02_MACM<br>U,tr F6WZ20 F6WZ20_MAC<br>MU,tr F7BUQ2 F7BUQ2_M<br>ONDO,tr F7BUZ6 F7BUZ6_M<br>ONDO,tr F7IK44 F7IK44_CALJ<br>A,tr Q3TL | qYA<br>DVE | 95% | 55.2 | 48.67909 | Ref | 0.12  | -0.45                      | -0.36 | -0.72 | -0.07 | 0.21  | -0.06 | 439  | 456  | 334                        | 398  | 343  | 469  | 594  | 488  | 616.8 | 1231.6 | 2 | 0.0086 | 7.015 |

|                                                                                       |                                                                                                                                                                                                                                                                      |                                                     |            |             |                 |            |                                    |              |              |              |              |              |              |              |                                    |              |              |              |              |              |              |              |               |          |               |              |
|---------------------------------------------------------------------------------------|----------------------------------------------------------------------------------------------------------------------------------------------------------------------------------------------------------------------------------------------------------------------|-----------------------------------------------------|------------|-------------|-----------------|------------|------------------------------------|--------------|--------------|--------------|--------------|--------------|--------------|--------------|------------------------------------|--------------|--------------|--------------|--------------|--------------|--------------|--------------|---------------|----------|---------------|--------------|
| <p>Heterogeneous nuclear ribonucleoprotein K OS=Bos taurus GN=HNRNPK PE=2 SV=1</p>    | <p>0 HNRPK_BOVIN,s<br/>p Q4R4M6 HNRPK_MACFA,s<br/>p Q5R5H8 HNRPK_PONAB,t<br/>r B2M1R6 B2M1R6_MOUSE<br/>,tr F6WZ02 F6WZ02_MACM<br/>U, tr F6WZ20 F6WZ20_MAC<br/>MU, tr F7BUQ2 F7BUQ2_M<br/>ONDO, tr F7BUZ6 F7BUZ6_M<br/>ONDO, tr F7IK44 F7IK44_CALJ<br/>A, tr Q3TL</p> | <p>tDYN<br/>ASVS<br/>VPD<br/>SSGP<br/>ER</p>        | <p>95%</p> | <p>66.4</p> | <p>51.41704</p> | <p>Ref</p> | <p>-0.002</p>                      | <p>-0.28</p> | <p>-0.39</p> | <p>-0.15</p> | <p>0.002</p> | <p>-0.29</p> | <p>-0.25</p> | <p>6650</p>  | <p>5610</p>                        | <p>5020</p>  | <p>5240</p>  | <p>6820</p>  | <p>6590</p>  | <p>5640</p>  | <p>5730</p>  | <p>1043</p>  | <p>2084</p>   | <p>2</p> | <p>0.0119</p> | <p>5.727</p> |
| <p>Nuclease-sensitive element-binding protein 1 OS=Mus musculus GN=Ybx1 PE=1 SV=3</p> | <p>0 YBOX1_MOUSE,s<br/>p P62961 YBOX1_RAT,sp P67808 YBOX1_BOVIN,sp P67809 YBOX1_HUMAN,s<br/>p Q28618 YBOX1_RABIT, tr A2BGG7 A2BGG7_MOUSE, tr A4UTS9 A4UTS9_SHEEP, tr D2HX94 D2HX94_AILME, tr D3ZEV0 D3ZEV0_RAT, tr E2R1A0 E2R1A0_CANFA, tr E</p>                     | <p>gAEA<br/>ANV<br/>TGP<br/>GGV<br/>PVQ<br/>GSK</p> | <p>95%</p> | <p>64.3</p> | <p>54.45651</p> | <p>Ref</p> | <p>Value Missing (-0.94642276)</p> | <p>0.31</p>  | <p>0.29</p>  | <p>0.18</p>  | <p>1.1</p>   | <p>-0.55</p> | <p>0.67</p>  | <p>19100</p> | <p>Value Missing (-0.94642276)</p> | <p>22300</p> | <p>24500</p> | <p>25100</p> | <p>41300</p> | <p>13800</p> | <p>32000</p> | <p>768.8</p> | <p>2303.3</p> | <p>3</p> | <p>0.0195</p> | <p>8.45</p>  |

|                                                                                |                                                                                                                                                                                                                           |                                         |     |      |          |     |                            |      |       |       |      |       |      |      |                            |      |      |      |      |      |      |       |        |   |        |       |
|--------------------------------------------------------------------------------|---------------------------------------------------------------------------------------------------------------------------------------------------------------------------------------------------------------------------|-----------------------------------------|-----|------|----------|-----|----------------------------|------|-------|-------|------|-------|------|------|----------------------------|------|------|------|------|------|------|-------|--------|---|--------|-------|
| Nuclease-sensitive element-binding protein 1 OS=Mus musculus GN=Ybx1 PE=1 SV=3 | 0 YBOX1_MOUSE,sp P62961 YBOX1_RAT,sp P67808 YBOX1_BOVIN,sp P67809 YBOX1_HUMAN,sp Q28618 YBOX1_RABIT,tr A2BGG7 A2BGG7_MOUSE,tr A4UTS9 A4UTS9_SHEEP,tr D2HX94 D2HX94_AILME,tr D3ZEV0 D3ZEV0_RAT,tr E2R1A0 E2R1A0_CANFA,tr E | gAEA<br>ANV<br>TGP<br>GGV<br>PVQ<br>GSK | 95% | 51.6 | 54.38155 | Ref | Value Missing (-2.9491067) | 0.39 | 0.39  | 0.37  | 1.1  | -0.81 | 0.98 | 2500 | Value Missing (-2.9491067) | 4170 | 4680 | 5100 | 7620 | 2060 | 7030 | 1153  | 2303.3 | 2 | 0.0149 | 6.455 |
| Nuclease-sensitive element-binding protein 1 OS=Mus musculus GN=Ybx1 PE=1 SV=3 | 0 YBOX1_MOUSE,sp P62961 YBOX1_RAT,sp P67808 YBOX1_BOVIN,sp P67809 YBOX1_HUMAN,sp Q28618 YBOX1_RABIT,tr A2BGG7 A2BGG7_MOUSE,tr A4UTS9 A4UTS9_SHEEP,tr D2HX94 D2HX94_AILME,tr D3ZEV0 D3ZEV0_RAT,tr E2R1A0 E2R1A0_CANFA,tr E | gAEA<br>ANV<br>TGP<br>GGV<br>PVQ<br>GSK | 95% | 71.9 | 54.48881 | Ref | -0.029                     | 0.23 | -0.09 | 0.022 | 0.69 | -0.08 | 0.77 | 5850 | 4380                       | 5700 | 5110 | 6090 | 8450 | 5180 | 9260 | 768.8 | 2303.2 | 3 | 0.0211 | 9.166 |

|                                                                                |                                                                                                                                                                                                                           |                                         |     |      |          |     |        |      |       |        |      |       |      |      |      |       |       |       |       |      |       |       |        |   |        |       |
|--------------------------------------------------------------------------------|---------------------------------------------------------------------------------------------------------------------------------------------------------------------------------------------------------------------------|-----------------------------------------|-----|------|----------|-----|--------|------|-------|--------|------|-------|------|------|------|-------|-------|-------|-------|------|-------|-------|--------|---|--------|-------|
| Nuclease-sensitive element-binding protein 1 OS=Mus musculus GN=Ybx1 PE=1 SV=3 | 0 YBOX1_MOUSE,sp P62961 YBOX1_RAT,sp P67808 YBOX1_BOVIN,sp P67809 YBOX1_HUMAN,sp Q28618 YBOX1_RABIT,tr A2BGG7 A2BGG7_MOUSE,tr A4UTS9 A4UTS9_SHEEP,tr D2HX94 D2HX94_AILME,tr D3ZEV0 D3ZEV0_RAT,tr E2R1A0 E2R1A0_CANFA,tr E | gAEA<br>AnVT<br>GPG<br>GVP<br>VQG<br>Sk | 95% | 61.5 | 54.55586 | Ref | 0.0033 | 0.12 | 0.38  | 0.31   | 0.54 | -0.25 | 0.71 | 9600 | 8650 | 10200 | 13700 | 14400 | 14700 | 8870 | 17100 | 769.1 | 2304.2 | 3 | 0.0227 | 9.844 |
| Nuclease-sensitive element-binding protein 1 OS=Mus musculus GN=Ybx1 PE=1 SV=3 | 0 YBOX1_MOUSE,sp P62961 YBOX1_RAT,sp P67808 YBOX1_BOVIN,sp P67809 YBOX1_HUMAN,sp Q28618 YBOX1_RABIT,tr A2BGG7 A2BGG7_MOUSE,tr A4UTS9 A4UTS9_SHEEP,tr D2HX94 D2HX94_AILME,tr D3ZEV0 D3ZEV0_RAT,tr E2R1A0 E2R1A0_CANFA,tr E | nEGS<br>ESAP<br>EGQ<br>AQQ<br>R         | 93% | 46.3 | 50.31441 | Ref | 0.12   | 0.39 | 0.052 | -0.021 | 0.52 | -0.14 | 0.41 | 5770 | 3830 | 5010  | 4450  | 4660  | 5930  | 3910 | 5690  | 631.3 | 1890.9 | 3 | 0.0123 | 6.475 |

|                                                                                |                                                                                                                                                                                                                            |                                                               |     |      |          |     |                            |       |      |      |      |       |      |      |      |      |      |      |      |      |       |        |        |        |        |      |
|--------------------------------------------------------------------------------|----------------------------------------------------------------------------------------------------------------------------------------------------------------------------------------------------------------------------|---------------------------------------------------------------|-----|------|----------|-----|----------------------------|-------|------|------|------|-------|------|------|------|------|------|------|------|------|-------|--------|--------|--------|--------|------|
| Nuclease-sensitive element-binding protein 1 OS=Mus musculus GN=Ybx1 PE=1 SV=3 | 0 YBOX1_MOUSE,sp P62961 YBOX1_RAT,sp P67808 YBOX1_BOVIN,sp P67809 YBOX1_HUMAN,sp Q28618 YBOX1_RABIT,tr A2BGG7 A2BGG7_MOUSE,tr A44UTS9 A4UTS9_SHEEP,tr D2HX94 D2HX94_AILME,tr D3ZEV0 D3ZEV0_RAT,tr E2R1A0 E2R1A0_CANFA,tr E | nEGS<br>ESAP<br>EGQ<br>AQQ<br>R                               | 95% | 52.1 | 50.30373 | Ref | -0.64                      | 0.26  | 0.39 | 0.17 | 0.7  | -0.41 | 0.73 | 4610 | 2120 | 4310 | 5270 | 4980 | 6310 | 3040 | 6660  | 946.5  | 1890.9 | 2      | 0.0118 | 6.25 |
| Nuclease-sensitive element-binding protein 1 OS=Mus musculus GN=Ybx1 PE=1 SV=3 | 0 YBOX1_MOUSE,sp P62961 YBOX1_RAT,sp P67808 YBOX1_BOVIN,sp P67809 YBOX1_HUMAN,sp Q28618 YBOX1_RABIT,tr A2BGG7 A2BGG7_MOUSE,tr A44UTS9 A4UTS9_SHEEP,tr D2HX94 D2HX94_AILME,tr D3ZEV0 D3ZEV0_RAT,tr E2R1A0 E2R1A0_CANFA,tr E | nYQ<br>QNY<br>QNS<br>ESGE<br>kNE<br>GSES<br>APE<br>GQA<br>QQR | 71% | 34.2 | 52.76211 | Ref | Value Missing (-0.9304516) | 0.018 | 0.39 | 0.11 | 0.65 | -0.52 | 1.2  | 6626 | 650  | 946  | 857  | 1090 | 505  | 1690 | 967.2 | 3864.8 | 4      | 0.0258 | 6.668  |      |

|                                                                                |                                                                                                                                                                                                                      |                                       |     |      |          |     |              |              |              |                |              |                  |                                |                        |                            |                           |                       |                            |                         |                              |      |        |        |        |        |       |
|--------------------------------------------------------------------------------|----------------------------------------------------------------------------------------------------------------------------------------------------------------------------------------------------------------------|---------------------------------------|-----|------|----------|-----|--------------|--------------|--------------|----------------|--------------|------------------|--------------------------------|------------------------|----------------------------|---------------------------|-----------------------|----------------------------|-------------------------|------------------------------|------|--------|--------|--------|--------|-------|
| Nuclease-sensitive element-binding protein 1 OS=Mus musculus GN=Ybx1 PE=1 SV=3 | 0 YBOX1_MOUSE,sp P62961 YBOX1_RAT,sp P67808 YBOX1_BOVIN,sp P67809 YBOX1_HUMAN,sp Q28618 YBOX1_RABIT,tr A2BGG7 A2BGG7_MOUSE,tr A44UTS9 A4EP,tr D2HX94 D2HX94_AILM E,tr D3ZEV0 D3ZEV0_RAT,tr E2R1A0 E2R1A0_C ANFA,tr E | nYQ QNY QnSE SGEK NEG SESA PEG QAQ QR | 73% | 34.4 | 52.17479 | Ref | -0.41        | 0.28         | 0.18         | 0.36           | 0.81         | -0.75            | 0.79                           | 1060                   | 653                        | 1150                      | 1200                  | 1490                       | 1790                    | 632                          | 1820 | 967.4  | 3865.8 | 4      | 0.0289 | 7.486 |
| Nuclease-sensitive element-binding protein 1 OS=Mus musculus GN=Ybx1 PE=1 SV=3 | 0 YBOX1_MOUSE,sp P62961 YBOX1_RAT,sp P67808 YBOX1_BOVIN,sp P67809 YBOX1_HUMAN,sp Q28618 YBOX1_RABIT,tr A2BGG7 A2BGG7_MOUSE,tr A44UTS9 A4EP,tr D2HX94 D2HX94_AILM E,tr D3ZEV0 D3ZEV0_RAT,tr E2R1A0 E2R1A0_C ANFA,tr E | rPQY SNPP VqG EVM EGA DNQ GAG EQG R   | 95% | 52.5 | 53.16285 | Ref | (0.42246917) | (0.30477577) | (0.13818116) | (0.0022981418) | (0.19357438) | (0.130807614789) | Reference Missing (0.52907921) | No Values (0.22007921) | No Values (0.422469477577) | No Values (0.30477578116) | No Values (0.1381418) | No Values (0.002298357438) | No Values (0.130807619) | Reference Missing (0.529478) | 1060 | 3175.5 | 3      | 0.0036 | 1.126  |       |

|                                                                                |                                                                                                                                                                                                                                 |                                       |     |      |          |     |                       |                        |                         |                                |                        |                                |                       |                            |                        |                         |                                |                        |                        |                               |                        |        |        |        |        |       |
|--------------------------------------------------------------------------------|---------------------------------------------------------------------------------------------------------------------------------------------------------------------------------------------------------------------------------|---------------------------------------|-----|------|----------|-----|-----------------------|------------------------|-------------------------|--------------------------------|------------------------|--------------------------------|-----------------------|----------------------------|------------------------|-------------------------|--------------------------------|------------------------|------------------------|-------------------------------|------------------------|--------|--------|--------|--------|-------|
| Nuclease-sensitive element-binding protein 1 OS=Mus musculus GN=Ybx1 PE=1 SV=3 | 0 YBOX1_MOUSE,sp P62961 YBOX1_RAT,sp P67808 YBOX1_BOVIN,sp P67809 YBOX1_HUMAN,sp Q28618 YBOX1_RABIT,tr A2BGG7 A2BGG7_MOUSE,tr A44UTS9 A4EP,tr D2HX94 D2HX94_AILM, E, tr D3ZEV0 D3ZEV0_RAT, tr E2R1A0 E2R1A0_C2R1A0_C ANFA, tr E | rPQY SNPP VQG EVM EGA DnQ GAG EQG     | 84% | 41.5 | 53.3309  | Ref | No Values (0.4749647) | No Values (0.3572713)  | No Values (0.19067651)  | No Values (0.0501974)          | No Values (0.2406977)  | No Values (0.18317717)         | No Values (0.1945747) | Values (0.2725747)         | No Values (0.4749647)  | No Values (0.3572713)   | No Values (0.19067651)         | No Values (0.0501974)  | No Values (0.2406977)  | No Values (0.18330327)        | No Values (0.19417717) | 1060   | 3175.5 | 3      | 0.0012 | 0.366 |
|                                                                                | 0 YBOX1_MOUSE,sp P62961 YBOX1_RAT,sp P67808 YBOX1_BOVIN,sp P67809 YBOX1_HUMAN,sp Q28618 YBOX1_RABIT,tr A2BGG7 A2BGG7_MOUSE,tr A44UTS9 A4EP,tr D2HX94 D2HX94_AILM, E, tr D3ZEV0 D3ZEV0_RAT, tr E2R1A0 E2R1A0_C2R1A0_C ANFA, tr E | rPQY SNPP VQG EVM EGA DnQ GAG EQG RPV | 68% | 35.7 | 54.96185 | Ref | No Values (0.2878737) | No Values (0.17018013) | No Values (0.003585335) | Reference Missing (0.27372235) | No Values (0.05897882) | Reference Missing (0.89778798) | No Values (0.0859959) | No Values (0.287873483647) | No Values (0.17018013) | No Values (0.003585335) | Reference Missing (0.27372226) | No Values (0.05897882) | No Values (0.00379959) | Reference Missing (0.8979959) | 882.7                  | 3526.7 | 4      | 0.0192 | 5.432  |       |

|                                                                                       |                                                                                                                                                                                                                                  |                                                |            |             |                 |            |               |             |              |              |              |              |               |              |              |              |              |               |                 |              |              |              |                 |              |               |             |               |              |
|---------------------------------------------------------------------------------------|----------------------------------------------------------------------------------------------------------------------------------------------------------------------------------------------------------------------------------|------------------------------------------------|------------|-------------|-----------------|------------|---------------|-------------|--------------|--------------|--------------|--------------|---------------|--------------|--------------|--------------|--------------|---------------|-----------------|--------------|--------------|--------------|-----------------|--------------|---------------|-------------|---------------|--------------|
| <p>Nuclease-sensitive element-binding protein 1 OS=Mus musculus GN=Ybx1 PE=1 SV=3</p> | <p>0 YBOX1_MOUSE,sp P62961 YBOX1_RAT,sp P67808 YBOX1_BOVIN,sp P67809 YBOX1_HUMAN,sp Q28618 YBOX1_RABIT,tr A2BGG7 A2BGG7_MOUSE,tr A44UTS9 A4UTS9_SHEP,tr D2HX94 D2HX94_AILME,tr D3ZEV0 D3ZEV0_RAT,tr E2R1A0 E2R1A0_CANFA,tr E</p> | <p>rPQy SNPP VQG EVM EGA DNQ GAG EQG RPV R</p> | <p>57%</p> | <p>30.8</p> | <p>55.67691</p> | <p>Ref</p> | <p>0.14</p>   | <p>0.13</p> | <p>0.28</p>  | <p>0.19</p>  | <p>0.56</p>  | <p>0.066</p> | <p>0.52</p>   | <p>2070</p>  | <p>1960</p>  | <p>2110</p>  | <p>2620</p>  | <p>2730</p>   | <p>3080</p>     | <p>2280</p>  | <p>3100</p>  | <p>767.2</p> | <p>3830.9</p>   | <p>5</p>     | <p>0.0433</p> | <p>11.3</p> |               |              |
| <p>Nuclease-sensitive element-binding protein 1 OS=Mus musculus GN=Ybx1 PE=1 SV=3</p> | <p>0 YBOX1_MOUSE,sp P62961 YBOX1_RAT,sp P67808 YBOX1_BOVIN,sp P67809 YBOX1_HUMAN,sp Q28618 YBOX1_RABIT,tr A2BGG7 A2BGG7_MOUSE,tr A44UTS9 A4UTS9_SHEP,tr D2HX94 D2HX94_AILME,tr D3ZEV0 D3ZEV0_RAT,tr E2R1A0 E2R1A0_CANFA,tr E</p> | <p>rPQY SNPP VQG EVM EGA DNQ GAG EQG RPV R</p> | <p>64%</p> | <p>34.9</p> | <p>54.93355</p> | <p>Ref</p> | <p>0.0947</p> | <p>0.21</p> | <p>0.086</p> | <p>0.190</p> | <p>0.446</p> | <p>0.582</p> | <p>0.8369</p> | <p>49204</p> | <p>38708</p> | <p>35522</p> | <p>35522</p> | <p>0.0860</p> | <p>0.190789</p> | <p>63870</p> | <p>63870</p> | <p>0.582</p> | <p>0.838492</p> | <p>882.9</p> | <p>3527.7</p> | <p>4</p>    | <p>0.0057</p> | <p>1.625</p> |



|                                                                                |                                                                                                                                                                                                                                     |                        |     |      |          |     |       |      |       |      |      |       |      |      |      |      |      |      |       |      |      |       |        |   |        |       |
|--------------------------------------------------------------------------------|-------------------------------------------------------------------------------------------------------------------------------------------------------------------------------------------------------------------------------------|------------------------|-----|------|----------|-----|-------|------|-------|------|------|-------|------|------|------|------|------|------|-------|------|------|-------|--------|---|--------|-------|
| Nuclease-sensitive element-binding protein 1 OS=Mus musculus GN=Ybx1 PE=1 SV=3 | 0 YBOX1_MOUSE,s p P62961  YBOX1_R AT,sp P67808 YBOX1_BOVIN, sp P67809 YBOX1_HUMAN,s p Q28618  YBOX1_R ABIT,tr A2BGG7 A2BGG7_MOUSE,tr A44UTS9 A4UTS9_SHE EP,tr D2HX94 D2HX94_AILME,tr D3ZEV0 D3ZEV0_RAT,tr E2R1A0 E2R1A0_C ANFA,tr E | SVG DGE TVEF DVV EG EK | 95% | 50.5 | 54.10469 | Ref | -0.74 | 0.23 | 0.28  | 0.22 | 0.86 | -0.44 | 0.92 | 2280 | 1280 | 2720 | 3150 | 3340 | 4520  | 1920 | 4910 | 1203  | 2403.2 | 2 | 0.0212 | 8.822 |
| Nuclease-sensitive element-binding protein 1 OS=Mus musculus GN=Ybx1 PE=1 SV=3 | 0 YBOX1_MOUSE,s p P62961  YBOX1_R AT,sp P67808 YBOX1_BOVIN, sp P67809 YBOX1_HUMAN,s p Q28618  YBOX1_R ABIT,tr A2BGG7 A2BGG7_MOUSE,tr A44UTS9 A4UTS9_SHE EP,tr D2HX94 D2HX94_AILME,tr D3ZEV0 D3ZEV0_RAT,tr E2R1A0 E2R1A0_C ANFA,tr E | SVG DGE TVEF DVV EG EK | 83% | 41.6 | 54.12408 | Ref | -0.29 | 0.34 | 0.045 | 0.22 | 0.96 | -0.14 | 0.5  | 5210 | 3800 | 6390 | 5840 | 7250 | 10600 | 5180 | 7980 | 802.1 | 2403.2 | 3 | 0.0204 | 8.475 |

|                                                                                |                                                                                                                                                                                                                                  |                                   |     |      |          |     |        |     |      |      |      |      |      |       |       |       |       |       |       |       |        |       |        |   |        |       |
|--------------------------------------------------------------------------------|----------------------------------------------------------------------------------------------------------------------------------------------------------------------------------------------------------------------------------|-----------------------------------|-----|------|----------|-----|--------|-----|------|------|------|------|------|-------|-------|-------|-------|-------|-------|-------|--------|-------|--------|---|--------|-------|
| Nuclease-sensitive element-binding protein 1 OS=Mus musculus GN=Ybx1 PE=1 SV=3 | 0 YBOX1_MOUSE,s p P62961  YBOX1_R AT,sp P67808 YBOX1_BOVIN, sp P67809 YBOX1_HUMAN,s p Q28618  YBOX1_R ABIT,tr A2BGG7 A2BGG7_MOUSE,tr A4UTS9 A4UTS9_SHEP,tr D2HX94 D2HX94_AILME,tr D3ZEV0 D3ZEV0_RAT,tr E2R1A0 E2R1A0_C ANFA,tr E | SVG<br>DGE<br>TVEF<br>DVV<br>EGEK | 73% | 38.2 | 54.12506 | Ref | -0.29  | 0.3 | 0.34 | 0.28 | 0.67 | -0.5 | 0.97 | 44700 | 43300 | 71000 | 81600 | 86700 | 99200 | 45900 | 126000 | 802.1 | 2403.2 | 3 | 0.0197 | 8.176 |
| Nuclease-sensitive element-binding protein 1 OS=Mus musculus GN=Ybx1 PE=1 SV=3 | 0 YBOX1_MOUSE,s p P62961  YBOX1_R AT,sp P67808 YBOX1_BOVIN, sp P67809 YBOX1_HUMAN,s p Q28618  YBOX1_R ABIT,tr A2BGG7 A2BGG7_MOUSE,tr A4UTS9 A4UTS9_SHEP,tr D2HX94 D2HX94_AILME,tr D3ZEV0 D3ZEV0_RAT,tr E2R1A0 E2R1A0_C ANFA,tr E | SVG<br>DGE<br>TVEF<br>DVV<br>EGEK | 91% | 47.4 | 54.0917  | Ref | -0.087 | 0.4 | 0.32 | 0.37 | 0.43 | 0.26 | 0.24 | 2890  | 2380  | 3620  | 3830  | 4370  | 3990  | 3710  | 3640   | 802.1 | 2403.2 | 3 | 0.0226 | 9.386 |

|                                                                                |                                                                                                                                                                                                                                    |                        |     |      |          |     |       |      |       |      |      |      |      |     |     |     |     |     |      |     |      |       |        |   |        |       |
|--------------------------------------------------------------------------------|------------------------------------------------------------------------------------------------------------------------------------------------------------------------------------------------------------------------------------|------------------------|-----|------|----------|-----|-------|------|-------|------|------|------|------|-----|-----|-----|-----|-----|------|-----|------|-------|--------|---|--------|-------|
| Nuclease-sensitive element-binding protein 1 OS=Mus musculus GN=Ybx1 PE=1 SV=3 | 0 YBOX1_MOUSE,s p P62961  YBOX1_R AT,sp P67808 YBOX1_BOVIN, sp P67809 YBOX1_HUMAN,s p Q28618  YBOX1_R ABIT,tr A2BGG7 A2BGG7_MOUSE,tr A4UTS9 A4UTS9_SHE EP,tr D2HX94 D2HX94_AILME,tr D3ZEV0 D3ZEV0_RAT,tr E2R1A0 E2R1A0_C ANFA,tr E | SVG DGE TVEF DVV EG EK | 81% | 40.8 | 54.19119 | Ref | 0.15  | 0.21 | -0.03 | 0.13 | 0.45 | 0.19 | 0.74 | 743 | 716 | 812 | 772 | 949 | 1030 | 902 | 1310 | 802.1 | 2403.2 | 3 | 0.0162 | 6.728 |
| Nuclease-sensitive element-binding protein 1 OS=Mus musculus GN=Ybx1 PE=1 SV=3 | 0 YBOX1_MOUSE,s p P62961  YBOX1_R AT,sp P67808 YBOX1_BOVIN, sp P67809 YBOX1_HUMAN,s p Q28618  YBOX1_R ABIT,tr A2BGG7 A2BGG7_MOUSE,tr A4UTS9 A4UTS9_SHE EP,tr D2HX94 D2HX94_AILME,tr D3ZEV0 D3ZEV0_RAT,tr E2R1A0 E2R1A0_C ANFA,tr E | SVG DGE TVEF DVV EG EK | 76% | 39.1 | 54.30971 | Ref | -0.34 | 0.22 | 0.29  | 0.18 | 0.44 | 0.18 | 0.73 | 406 | 262 | 421 | 494 | 504 | 529  | 462 | 670  | 802.1 | 2403.2 | 3 | 0.0109 | 4.52  |

|                                                                                |                                                                                                                                                                                                                             |                       |     |      |          |     |                        |                               |                              |                              |                              |                       |                                |                        |                        |                               |                             |                              |                       |                                |        |        |        |        |        |       |
|--------------------------------------------------------------------------------|-----------------------------------------------------------------------------------------------------------------------------------------------------------------------------------------------------------------------------|-----------------------|-----|------|----------|-----|------------------------|-------------------------------|------------------------------|------------------------------|------------------------------|-----------------------|--------------------------------|------------------------|------------------------|-------------------------------|-----------------------------|------------------------------|-----------------------|--------------------------------|--------|--------|--------|--------|--------|-------|
| Nuclease-sensitive element-binding protein 1 OS=Mus musculus GN=Ybx1 PE=1 SV=3 | 0 YBOX1_MOUSE,sp P62961 YBOX1_RAT,sp P67808 YBOX1_BOVIN,sp P67809 YBOX1_HUMAN,sp Q28618 YBOX1_RABIT,tr A2BGG7 A2BGG7_MOUSE,tr A44UTS9 A44UTS9_SHEEP,tr D2HX94 D2HX94_AILME,tr D3ZEV0 D3ZEV0_RAT,tr E2R1A0 E2R1A0_CANFA,tr E | SVG DGE TVEF DVV EGEK | 95% | 55.7 | 54.07326 | Ref | No Values (-2.7551253) | Reference Missing (0.5045076) | Reference Missing (0.991224) | Reference Missing (0.881822) | Reference Missing (1.209106) | No Values (-3.046787) | Reference Missing (0.64344174) | No Values (-2.9575152) | No Values (-2.7551253) | Reference Missing (0.5045076) | Reference Missing (0.99124) | Reference Missing (0.881822) | No Values (-3.046787) | Reference Missing (0.64344174) | 802.1  | 2403.2 | 3      | 0.0227 | 9.461  |       |
| Elongation factor 1-delta OS=Ovis aries GN=EEF1D PE=2 SV=1                     | sp Q717R8 EF1D_SHEEP,tr F1SEV8 F1SEV8_PIG                                                                                                                                                                                   | aTNF LVHE             | 80% | 37.5 | 52.04454 | Ref | 0.41                   | -0.31                         | 0.083                        | -0.17                        | 0.091                        | -0.55                 | -0.13                          | 1E+05                  | 125000                 | 82300                         | 121000                      | 112000                       | 1E+05                 | 78400                          | 105000 | 702.9  | 1403.8 | 2      | 0.0111 | 7.893 |
| Elongation factor 1-delta OS=Ovis aries GN=EEF1D PE=2 SV=1                     | sp Q717R8 EF1D_SHEEP,tr F1SEV8 F1SEV8_PIG                                                                                                                                                                                   | aTnF LVHE             | 77% | 36   | 51.68321 | Ref | 0.12                   | -0.16                         | 0.036                        | -0.11                        | 0.033                        | -0.1                  | -0.01                          | 14200                  | 15400                  | 13700                         | 17700                       | 17700                        | 17000                 | 16300                          | 17200  | 703.4  | 1404.7 | 2      | 0.0128 | 9.103 |
| Elongation factor 1-delta OS=Ovis aries GN=EEF1D PE=1 SV=1                     | sp Q717R8 EF1D_SHEEP,tr F1SEV8 F1SEV8_PIG                                                                                                                                                                                   | gVV QDL QQA VSK       | 95% | 87.7 | 52.18165 | Ref | 0.027                  | -0.29                         | 0.1                          | -0.11                        | 0.21                         | -0.31                 | -0.05                          | 9840                   | 8730                   | 7600                          | 11200                       | 10700                        | 11600                 | 8450                           | 10000  | 940.5  | 1879.1 | 2      | 0.0144 | 7.649 |

|                                                            |                                    |                                 |     |      |          |     |        |       |       |        |       |       |       |       |       |       |       |       |       |       |       |       |        |   |        |       |
|------------------------------------------------------------|------------------------------------|---------------------------------|-----|------|----------|-----|--------|-------|-------|--------|-------|-------|-------|-------|-------|-------|-------|-------|-------|-------|-------|-------|--------|---|--------|-------|
| Elongation factor 1-delta OS=Ovis aries GN=EEF1D PE=2 SV=1 | sp Q717R8 EF1D_SHEEP,tr F1SEV8_PIG | iASL<br>EVE<br>NQS<br>LR        | 95% | 48.1 | 53.09268 | Ref | -0.036 | -0.29 | 0.15  | -0.089 | 0.13  | -0.42 | -0.03 | 8710  | 6760  | 6160  | 9350  | 8740  | 8860  | 6320  | 8270  | 832   | 1661.9 | 2 | 0.0157 | 9.453 |
| Elongation factor 1-delta OS=Ovis aries GN=EEF1D PE=2 SV=1 | sp Q717R8 EF1D_SHEEP,tr F1SEV8_PIG | iASL<br>EVE<br>NQS<br>LR        | 95% | 49.7 | 52.9414  | Ref | -0.014 | -0.22 | 0.068 | -0.061 | 0.17  | -0.4  | 0.049 | 25200 | 22100 | 20800 | 28400 | 28700 | 29400 | 20600 | 28000 | 832   | 1661.9 | 2 | 0.0119 | 7.179 |
| Elongation factor 1-delta OS=Ovis aries GN=EEF1D PE=2 SV=1 | sp Q717R8 EF1D_SHEEP,tr F1SEV8_PIG | iASL<br>EVE<br>NQS<br>LR        | 95% | 60.9 | 52.94078 | Ref | -0.035 | -0.2  | 0.057 | -0.069 | -0.04 | -0.48 | 0.11  | 18700 | 13900 | 13500 | 18100 | 18200 | 16200 | 12600 | 18700 | 555   | 1661.9 | 3 | 0.0099 | 5.968 |
| Elongation factor 1-delta OS=Ovis aries GN=EEF1D PE=2 SV=1 | sp Q717R8 EF1D_SHEEP,tr F1SEV8_PIG | iASL<br>EVE<br>NQS<br>LR        | 90% | 43.1 | 52.85931 | Ref | 0.069  | -0.27 | 0.098 | -0.16  | 0.081 | -0.59 | 0.16  | 4240  | 3610  | 3100  | 4480  | 4130  | 4260  | 2800  | 4670  | 832   | 1661.9 | 2 | 0.0045 | 2.705 |
| Elongation factor 1-delta OS=Ovis aries GN=EEF1D PE=2 SV=1 | sp Q717R8 EF1D_SHEEP,tr F1SEV8_PIG | iASL<br>EVE<br>NQS<br>LR        | 95% | 47.6 | 52.97944 | Ref | 0.1    | -0.2  | 0.017 | -0.2   | 0.099 | -0.27 | 0.034 | 5330  | 4960  | 4380  | 5700  | 5410  | 5810  | 4710  | 5760  | 832   | 1661.9 | 2 | 0.0105 | 6.302 |
| Elongation factor 1-delta OS=Ovis aries GN=EEF1D PE=2 SV=1 | sp Q717R8 EF1D_SHEEP,tr F1SEV8_PIG | kFYE<br>QMn<br>GPV<br>AGSS<br>R | 95% | 55.1 | 54.31509 | Ref | -0.086 | -0.06 | 0.13  | 0.059  | 0.022 | -0.42 | -0.02 | 14200 | 12100 | 13300 | 17100 | 17900 | 15200 | 11700 | 15400 | 760.7 | 2279.2 | 3 | 0.0194 | 8.513 |

|                                                            |                                    |                      |     |      |          |     |        |       |       |        |       |       |       |       |      |      |       |       |       |       |       |       |        |   |        |       |
|------------------------------------------------------------|------------------------------------|----------------------|-----|------|----------|-----|--------|-------|-------|--------|-------|-------|-------|-------|------|------|-------|-------|-------|-------|-------|-------|--------|---|--------|-------|
| Elongation factor 1-delta OS=Ovis aries GN=EEF1D PE=2 SV=1 | sp Q717R8 EF1D_SHEEP,tr F1SEV8_PIG | kFYE QMn GPV AGSS R  | 94% | 50.9 | 54.33714 | Ref | -0.13  | -0.2  | 0.13  | -0.043 | -0.02 | 0.045 | -0.05 | 11000 | 9540 | 9800 | 13900 | 13600 | 12000 | 13100 | 12200 | 760.7 | 2279.2 | 3 | 0.0168 | 7.382 |
| Elongation factor 1-delta OS=Ovis aries GN=EEF1D PE=2 SV=1 | sp Q717R8 EF1D_SHEEP,tr F1SEV8_PIG | kFYE QMn GPV AGSS R  | 89% | 45.7 | 54.3028  | Ref | -0.16  | -0.12 | -0    | -0.028 | -0.04 | 0.005 | 0.072 | 5330  | 4470 | 4980 | 6070  | 6570  | 5700  | 6130  | 6370  | 760.7 | 2279.2 | 3 | 0.0198 | 8.671 |
| Elongation factor 1-delta OS=Ovis aries GN=EEF1D PE=2 SV=1 | sp Q717R8 EF1D_SHEEP,tr F1SEV8_PIG | kFYE QMn GPV AGSS R  | 95% | 56.6 | 54.31759 | Ref | -0.11  | -0.21 | -0    | -0.083 | 0.15  | -0.16 | 0.12  | 6680  | 5770 | 5840 | 7570  | 7900  | 8130  | 6850  | 8230  | 760.7 | 2279.2 | 3 | 0.0183 | 8.026 |
| Elongation factor 1-delta OS=Ovis aries GN=EEF1D PE=2 SV=1 | sp Q717R8 EF1D_SHEEP,tr F1SEV8_PIG | kFYE QMn GPV AGSS R  | 93% | 50.2 | 54.41391 | Ref | -0.028 | -0.1  | -0.01 | -0.081 | 0.25  | -0.2  | 0.016 | 5160  | 5270 | 5430 | 6500  | 6820  | 7490  | 5740  | 6600  | 760.7 | 2279.2 | 3 | 0.0139 | 6.092 |
| Elongation factor 1-delta OS=Ovis aries GN=EEF1D PE=2 SV=1 | sp Q717R8 EF1D_SHEEP,tr F1SEV8_PIG | kFYE QMn GPV AGSS R  | 72% | 38.1 | 54.41391 | Ref | -0.093 | -0.25 | 0.012 | 0.023  | 0.083 | -0.04 | 0.069 | 5850  | 5500 | 5350 | 7200  | 8000  | 7280  | 7010  | 7470  | 760.7 | 2279.2 | 3 | 0.0139 | 6.092 |
| Elongation factor 1-delta OS=Ovis aries GN=EEF1D PE=2 SV=1 | sp Q717R8 EF1D_SHEEP,tr F1SEV8_PIG | kFYE Qm n GPV AGSS R | 82% | 41.2 | 54.08566 | Ref | -0.17  | -0.37 | 0.17  | 0.022  | 0.2   | -0.49 | 0.12  | 8020  | 6190 | 5860 | 9590  | 9510  | 9390  | 6100  | 9240  | 766.1 | 2295.2 | 3 | 0.0147 | 6.395 |

|                                                            |                                     |               |     |      |          |     |        |       |       |        |       |       |       |       |        |       |        |         |       |       |         |       |        |   |        |       |
|------------------------------------------------------------|-------------------------------------|---------------|-----|------|----------|-----|--------|-------|-------|--------|-------|-------|-------|-------|--------|-------|--------|---------|-------|-------|---------|-------|--------|---|--------|-------|
| Elongation factor 1-delta OS=Ovis aries GN=EEF1D PE=2 SV=1 | sp Q717R8 EF1D_S HEEP,tr F1SEV8_PIG | kPAL VAK      | 84% | 26.4 | 38.37525 | Ref | -0.12  | -0.05 | 0.025 | -0.16  | 0.19  | -0.42 | -0.11 | 49300 | 34600  | 39500 | 46700  | 45500   | 50500 | 34500 | 42500   | 547   | 1638.1 | 3 | 0.0076 | 4.618 |
| Elongation factor 1-delta OS=Ovis aries GN=EEF1D PE=2 SV=1 | sp Q717R8 EF1D_S HEEP,tr F1SEV8_PIG | kPAL VAK      | 52% | 20.7 | 40.93702 | Ref | -0.25  | -0.2  | 0.11  | -0.14  | 0.33  | -0.49 | 0.02  | 1E+06 | 725000 | 8E+05 | 1E+06  | 1050000 | 1E+06 | 8E+05 | 1060000 | 547   | 1638.1 | 3 | 0.0189 | 11.54 |
| Elongation factor 1-delta OS=Ovis aries GN=EEF1D PE=2 SV=1 | sp Q717R8 EF1D_S HEEP,tr F1SEV8_PIG | kPAL VAK      | 69% | 21.3 | 38.35183 | Ref | -0.3   | -0.25 | 0.084 | -0.12  | 0.27  | -0.28 | 0.076 | 33500 | 22900  | 25800 | 36300  | 34800   | 39700 | 28400 | 36000   | 547   | 1638.1 | 3 | 0.0063 | 3.831 |
| Elongation factor 1-delta OS=Ovis aries GN=EEF1D PE=2 SV=1 | sp Q717R8 EF1D_S HEEP,tr F1SEV8_PIG | kPAL VAK      | 87% | 28.1 | 38.3512  | Ref | -0.24  | -0.06 | -0.05 | -0.076 | 0.25  | -0.29 | -0.01 | 30500 | 21500  | 26500 | 29900  | 32300   | 35300 | 25400 | 30500   | 547   | 1638.1 | 3 | 0.0059 | 3.611 |
| Elongation factor 1-delta OS=Ovis aries GN=EEF1D PE=2 SV=1 | sp Q717R8 EF1D_S HEEP,tr F1SEV8_PIG | qEnG ASVI LR  | 75% | 36.1 | 52.22326 | Ref | -0.002 | -0.21 | 0.009 | -0.084 | 0.14  | -0.39 | 0.026 | 1E+05 | 98200  | 92100 | 121000 | 125000  | 1E+05 | 92100 | 122000  | 696.4 | 1390.8 | 2 | 0.0088 | 6.295 |
| Fetuin-B OS=Bos taurus GN=FETUB PE=2 SV=1                  | sp Q58D62 FETUB_BOVIN               | fMET ATES LAK | 86% | 42.6 | 53.53012 | Ref | 0.61   | 0.15  | 0.38  | 0.28   | -0.03 | 0.66  | 0.19  | 3350  | 3700   | 2920  | 3820   | 3950    | 2780  | 4680  | 3350    | 612.7 | 1835   | 3 | 0.0191 | 10.4  |
| Fetuin-B OS=Bos taurus GN=FETUB PE=2 SV=1                  | sp Q58D62 FETUB_BOVIN               | fMET ATES LAK | 92% | 45   | 53.5107  | Ref | 0.33   | 0.36  | 0.42  | 0.38   | -0.11 | 0.79  | 0.31  | 3860  | 4230   | 4700  | 5480   | 5880    | 3670  | 7130  | 5070    | 918.5 | 1835   | 2 | 0.0141 | 7.699 |

|                                           |                       |              |     |      |          |     |      |       |      |      |       |      |       |       |        |       |        |        |       |       |        |       |        |   |        |       |
|-------------------------------------------|-----------------------|--------------|-----|------|----------|-----|------|-------|------|------|-------|------|-------|-------|--------|-------|--------|--------|-------|-------|--------|-------|--------|---|--------|-------|
| Fetuin-B OS=Bos taurus GN=FETUB PE=2 SV=1 | sp Q58D62 FETUB_BOVIN | fMETATES LAK | 95% | 62.7 | 53.49064 | Ref | 0.56 | 0.044 | 0.46 | 0.32 | 0.031 | 0.85 | 0.21  | 5640  | 7680   | 5810  | 8730   | 8730   | 6220  | 11500 | 7300   | 918.5 | 1835   | 2 | 0.0132 | 7.165 |
| Fetuin-B OS=Bos taurus GN=FETUB PE=2 SV=1 | sp Q58D62 FETUB_BOVIN | fMETATES LAK | 81% | 40   | 53.51118 | Ref | 0.41 | 0.006 | 0.47 | 0.45 | -0.14 | 0.8  | 0.29  | 23300 | 24800  | 20300 | 31500  | 34200  | 19800 | 39700 | 27700  | 612.7 | 1835   | 3 | 0.0123 | 6.706 |
| Fetuin-B OS=Bos taurus GN=FETUB PE=2 SV=1 | sp Q58D62 FETUB_BOVIN | fMETATES LAK | 92% | 47.7 | 53.51118 | Ref | 0.54 | 0.061 | 0.44 | 0.53 | -0.21 | 0.82 | 0.38  | 4050  | 6110   | 4750  | 6930   | 8110   | 4240  | 9040  | 6650   | 612.7 | 1835   | 3 | 0.0123 | 6.706 |
| Fetuin-B OS=Bos taurus GN=FETUB PE=2 SV=1 | sp Q58D62 FETUB_BOVIN | gSVQYLP DWDk | 70% | 36.8 | 53.52032 | Ref | 0.59 | 0.23  | 0.47 | 0.32 | -0.01 | 0.72 | -0.03 | 32600 | 37300  | 31500 | 41700  | 41400  | 28900 | 49900 | 29500  | 639.3 | 1915   | 3 | 0.0171 | 8.946 |
| Fetuin-B OS=Bos taurus GN=FETUB PE=2 SV=1 | sp Q58D62 FETUB_BOVIN | gSVQYLP DWDk | 81% | 39.3 | 53.51812 | Ref | 0.38 | 0.16  | 0.32 | 0.47 | 0.15  | 0.82 | 0.24  | 2900  | 3410   | 3170  | 3990   | 4880   | 3410  | 5660  | 3770   | 958.5 | 1915   | 2 | 0.0169 | 8.839 |
| Fetuin-B OS=Bos taurus GN=FETUB PE=2 SV=1 | sp Q58D62 FETUB_BOVIN | gSVQYLP DWDk | 89% | 43.1 | 53.55724 | Ref | 0.44 | 0.23  | 0.45 | 0.48 | 0.043 | 0.79 | 0.044 | 6480  | 7880   | 7370  | 9650   | 10900  | 7000  | 12300 | 7260   | 958.5 | 1915   | 2 | 0.0144 | 7.503 |
| Fetuin-B OS=Bos taurus GN=FETUB PE=2 SV=1 | sp Q58D62 FETUB_BOVIN | gSVQYLP DWDk | 94% | 47.4 | 53.56647 | Ref | 0.51 | 0.15  | 0.43 | 0.42 | -0.03 | 0.68 | 0.22  | 5610  | 6410   | 5420  | 7380   | 8040   | 5160  | 8800  | 6350   | 958.5 | 1915   | 2 | 0.0141 | 7.377 |
| Fetuin-B OS=Bos taurus GN=FETUB PE=2 SV=1 | sp Q58D62 FETUB_BOVIN | sAecPGP AQk  | 86% | 39.7 | 52.03952 | Ref | 0.33 | 0.28  | 0.56 | 0.38 | 0.008 | 0.78 | 0.23  | 16800 | 20100  | 21100 | 28700  | 28000  | 18900 | 33700 | 22800  | 821.4 | 1640.8 | 2 | 0.0152 | 9.282 |
| Fetuin-B OS=Bos taurus GN=FETUB PE=2 SV=1 | sp Q58D62 FETUB_BOVIN | sAecPGP AQk  | 83% | 39.7 | 52.07834 | Ref | 0.46 | -0.11 | 0.48 | 0.47 | 0.082 | 0.75 | 0.37  | 1E+05 | 168000 | 1E+05 | 207000 | 226000 | 2E+05 | 3E+05 | 191000 | 548   | 1640.8 | 3 | 0.0136 | 8.311 |



|                                           |                       |              |     |      |          |     |      |       |      |      |       |      |      |       |       |       |       |       |       |       |       |       |        |   |        |       |
|-------------------------------------------|-----------------------|--------------|-----|------|----------|-----|------|-------|------|------|-------|------|------|-------|-------|-------|-------|-------|-------|-------|-------|-------|--------|---|--------|-------|
| Fetuin-B OS=Bos taurus GN=FETUB PE=2 SV=1 | sp Q58D62 FETUB_BOVIN | sAec PGP Aqk | 81% | 37.5 | 51.92907 | Ref | 0.39 | 0.24  | 0.43 | 0.37 | 0.21  | 0.68 | 0.22 | 7810  | 8650  | 8450  | 10800 | 11500 | 8970  | 13000 | 9330  | 821.4 | 1640.8 | 2 | 0.02   | 12.18 |
| Fetuin-B OS=Bos taurus GN=FETUB PE=2 SV=1 | sp Q58D62 FETUB_BOVIN | vVVL PFPS k  | 90% | 39.2 | 49.28677 | Ref | 0.38 | 0.21  | 0.52 | 0.42 | 0.088 | 0.74 | 0.14 | 16000 | 18000 | 17300 | 24200 | 24800 | 17200 | 28300 | 18600 | 797.5 | 1593   | 2 | 0.0254 | 15.91 |
| Fetuin-B OS=Bos taurus GN=FETUB PE=2 SV=1 | sp Q58D62 FETUB_BOVIN | vVVL PFPS k  | 95% | 47.2 | 48.41404 | Ref | 0.37 | 0.053 | 0.58 | 0.42 | 0.15  | 0.88 | 0.16 | 20300 | 27400 | 23800 | 38500 | 38000 | 27500 | 47900 | 28700 | 532   | 1593   | 3 | 0.0127 | 7.951 |
| Fetuin-B OS=Bos taurus GN=FETUB PE=2 SV=1 | sp Q58D62 FETUB_BOVIN | vVVL PFPS k  | 85% | 36.8 | 48.19636 | Ref | 0.25 | 0.27  | 0.57 | 0.29 | -0.25 | 0.98 | 0.13 | 22600 | 22100 | 24300 | 33500 | 30500 | 18400 | 44800 | 24700 | 532   | 1593   | 3 | 0.0101 | 6.352 |
| Fetuin-B OS=Bos taurus GN=FETUB PE=2 SV=1 | sp Q58D62 FETUB_BOVIN | vVVL PFPS k  | 57% | 25.7 | 47.04803 | Ref | 0.23 | 0.019 | 0.71 | 0.28 | 0.17  | 0.55 | 0.23 | 753   | 613   | 572   | 1040  | 850   | 686   | 931   | 740   | 399.3 | 1593   | 4 | 0.0052 | 3.281 |
| Fetuin-B OS=Bos taurus GN=FETUB PE=2 SV=1 | sp Q58D62 FETUB_BOVIN | vVVL PFPS k  | 92% | 39.4 | 48.14873 | Ref | 0.47 | 0.34  | 0.43 | 0.51 | 0.1   | 0.67 | 0.12 | 5960  | 8080  | 7990  | 9600  | 11200 | 7350  | 11300 | 7730  | 797.5 | 1593   | 2 | 0.0086 | 5.419 |
| Fetuin-B OS=Bos taurus GN=FETUB PE=2 SV=1 | sp Q58D62 FETUB_BOVIN | vVVL PFPS k  | 83% | 34.6 | 47.19961 | Ref | 0.29 | 0.23  | 0.46 | 0.41 | 0.056 | 0.63 | 0.32 | 1670  | 1570  | 1640  | 2150  | 2290  | 1560  | 2430  | 1950  | 532   | 1593   | 3 | #####  | 0.254 |
| Fetuin-B OS=Bos taurus GN=FETUB PE=2 SV=1 | sp Q58D62 FETUB_BOVIN | vVVL PFPS k  | 68% | 29.9 | 47.21266 | Ref | 0.36 | 0.21  | 0.38 | 0.39 | 0.077 | 0.54 | 0.36 | 1980  | 1820  | 1770  | 2240  | 2480  | 1740  | 2510  | 2190  | 532   | 1593   | 3 | 0.0045 | 2.833 |
| Fetuin-B OS=Bos taurus GN=FETUB PE=2 SV=1 | sp Q58D62 FETUB_BOVIN | yNSE SPSk    | 66% | 34   | 52.14298 | Ref | 0.45 | 0.18  | 0.5  | 0.42 | -0.15 | 0.92 | 0.2  | 4310  | 5890  | 5290  | 7460  | 7730  | 4550  | 10000 | 6020  | 760.4 | 1518.8 | 2 | 0.0058 | 3.834 |

|                                                                            |                                                                                                                                                                                                                           |             |     |      |          |     |       |       |      |       |      |       |      |      |      |      |      |      |      |      |      |     |        |   |        |       |
|----------------------------------------------------------------------------|---------------------------------------------------------------------------------------------------------------------------------------------------------------------------------------------------------------------------|-------------|-----|------|----------|-----|-------|-------|------|-------|------|-------|------|------|------|------|------|------|------|------|------|-----|--------|---|--------|-------|
| 40S ribosomal protein S19<br>OS=Rattus norvegicus<br>GN=Rps19 PE=2<br>SV=3 | 4 RS19_R<br>AT,sp P39019 RS19_HUMAN,sp Q32PD5 RS19_BOVIN,sp Q5R8M9 RS19_PONAB,sp Q9CZX8 RS19_MOUSE,tr B0ZBD0 B0ZBD0_HUMAN,tr B7SBG1 B7SBG1_AILME,tr D4A6G6 D4A6G6_RAT,tr F1P680 F1P680_CANFA,tr F1RGG1 F1RGG1_PIG,tr F6YV | aLAA<br>Flk | 69% | 28.3 | 45.38712 | Ref | -0.19 | -0.07 | 0.48 | 0.088 | 0.35 | -0.37 | 0.71 | 3970 | 3130 | 3690 | 6080 | 5090 | 5330 | 3370 | 7090 | 448 | 1340.9 | 3 | 0.0038 | 2.821 |
| 40S ribosomal protein S19<br>OS=Rattus norvegicus<br>GN=Rps19 PE=2<br>SV=3 | 4 RS19_R<br>AT,sp P39019 RS19_HUMAN,sp Q32PD5 RS19_BOVIN,sp Q5R8M9 RS19_PONAB,sp Q9CZX8 RS19_MOUSE,tr B0ZBD0 B0ZBD0_HUMAN,tr B7SBG1 B7SBG1_AILME,tr D4A6G6 D4A6G6_RAT,tr F1P680 F1P680_CANFA,tr F1RGG1 F1RGG1_PIG,tr F6YV | aLAA<br>Flk | 70% | 28.5 | 45.38712 | Ref | -0.63 | -0.03 | 0.25 | 0.24  | 0.47 | -0    | 0.69 | 3880 | 2280 | 3750 | 5080 | 5600 | 5700 | 4300 | 6880 | 448 | 1340.9 | 3 | 0.0031 | 2.329 |

|                                                                            |                                                                                                                                                                                                                           |             |     |      |          |     |       |       |      |      |      |       |      |       |       |       |       |       |       |       |       |     |        |   |        |       |
|----------------------------------------------------------------------------|---------------------------------------------------------------------------------------------------------------------------------------------------------------------------------------------------------------------------|-------------|-----|------|----------|-----|-------|-------|------|------|------|-------|------|-------|-------|-------|-------|-------|-------|-------|-------|-----|--------|---|--------|-------|
| 40S ribosomal protein S19<br>OS=Rattus norvegicus<br>GN=Rps19 PE=2<br>SV=3 | 4 RS19_R<br>AT,sp P39019 RS19_HUMAN,sp Q32PD5 RS19_BOVIN,sp Q5R8M9 RS19_PONAB,sp Q9CZX8 RS19_MOUSE,tr B0ZBD0 B0ZBD0_HUMAN,tr B7SBG1 B7SBG1_AILME,tr D4A6G6 D4A6G6_RAT,tr F1P680 F1P680_CANFA,tr F1RGG1 F1RGG1_PIG,tr F6YV | aLAA<br>Flk | 55% | 28.5 | 48.23285 | Ref | -0.57 | -0.03 | 0.28 | 0.27 | 0.42 | -0.23 | 0.76 | 17400 | 10300 | 16200 | 22700 | 24700 | 23900 | 16000 | 31400 | 448 | 1340.8 | 3 | 0.0224 | 16.73 |
| 40S ribosomal protein S19<br>OS=Rattus norvegicus<br>GN=Rps19 PE=2<br>SV=3 | 4 RS19_R<br>AT,sp P39019 RS19_HUMAN,sp Q32PD5 RS19_BOVIN,sp Q5R8M9 RS19_PONAB,sp Q9CZX8 RS19_MOUSE,tr B0ZBD0 B0ZBD0_HUMAN,tr B7SBG1 B7SBG1_AILME,tr D4A6G6 D4A6G6_RAT,tr F1P680 F1P680_CANFA,tr F1RGG1 F1RGG1_PIG,tr F6YV | aLAA<br>Flk | 70% | 28.6 | 45.40329 | Ref | -0.47 | -0.04 | 0.36 | 0.16 | 0.53 | -0.34 | 0.74 | 15600 | 10400 | 15200 | 22400 | 21600 | 24200 | 13900 | 29200 | 448 | 1340.9 | 3 | 0.0059 | 4.386 |

|                                                                            |                                                                                                                                                                                                                                 |                        |     |      |          |     |       |       |      |      |      |       |      |       |       |       |       |       |       |       |       |       |        |   |        |       |
|----------------------------------------------------------------------------|---------------------------------------------------------------------------------------------------------------------------------------------------------------------------------------------------------------------------------|------------------------|-----|------|----------|-----|-------|-------|------|------|------|-------|------|-------|-------|-------|-------|-------|-------|-------|-------|-------|--------|---|--------|-------|
| 40S ribosomal protein S19<br>OS=Rattus norvegicus<br>GN=Rps19 PE=2<br>SV=3 | 4 RS19_R<br>AT,sp P39019 RS19_HUMAN,sp Q32PD5 RS19_BOVIN,sp Q5R8M9 RS19_PONAB,sp Q9CZX8 RS19_MOUSE, tr B0ZBD0 B0ZBD0_HUMAN, tr B7SBG1 B7SBG1_AILME, tr D4A6G6 D4A6G6_RAT, tr F1P680 F1P680_CANFA, tr F1RGG1 F1RGG1_PIG, tr F6YV | aLAA<br>Flk            | 89% | 34.9 | 45.39578 | Ref | -0.34 | -0.03 | 0.41 | 0.27 | 0.5  | -0.17 | 0.36 | 23200 | 15000 | 20100 | 30700 | 30700 | 31400 | 20600 | 29600 | 671.4 | 1340.9 | 2 | 0.005  | 3.711 |
| 40S ribosomal protein S19<br>OS=Rattus norvegicus<br>GN=Rps19 PE=2<br>SV=3 | 4 RS19_R<br>AT,sp P39019 RS19_HUMAN,sp Q32PD5 RS19_BOVIN,sp Q5R8M9 RS19_PONAB,sp Q9CZX8 RS19_MOUSE, tr B0ZBD0 B0ZBD0_HUMAN, tr B7SBG1 B7SBG1_AILME, tr D4A6G6 D4A6G6_RAT, tr F1P680 F1P680_CANFA, tr F1RGG1 F1RGG1_PIG, tr F6YV | gGA<br>GVG<br>SMT<br>k | 93% | 44.5 | 52.04524 | Ref | -0.21 | 0.19  | 0.32 | 0.23 | 0.42 | -0.13 | 0.34 | 20300 | 15100 | 21600 | 26500 | 27400 | 27400 | 19500 | 26800 | 736.9 | 1471.8 | 2 | 0.0241 | 16.39 |

|                                                                            |                                                                                                                                                                                                                           |                        |     |      |          |     |       |      |      |       |      |       |      |       |       |       |       |       |       |       |       |       |        |   |        |       |
|----------------------------------------------------------------------------|---------------------------------------------------------------------------------------------------------------------------------------------------------------------------------------------------------------------------|------------------------|-----|------|----------|-----|-------|------|------|-------|------|-------|------|-------|-------|-------|-------|-------|-------|-------|-------|-------|--------|---|--------|-------|
| 40S ribosomal protein S19<br>OS=Rattus norvegicus<br>GN=Rps19 PE=2<br>SV=3 | 4 RS19_R<br>AT,sp P39019 RS19_HUMAN,sp Q32PD5 RS19_BOVIN,sp Q5R8M9 RS19_PONAB,sp Q9CZX8 RS19_MOUSE,tr B0ZBD0 B0ZBD0_HUMAN,tr B7SBG1 B7SBG1_AILME,tr D4A6G6 D4A6G6_RAT,tr F1P680 F1P680_CANFA,tr F1RGG1 F1RGG1_PIG,tr F6YV | gGA<br>GVG<br>SMT<br>k | 83% | 39.5 | 52.09236 | Ref | 0.099 | 0.26 | 0.36 | 0.039 | 0.43 | -0.27 | 0.19 | 58800 | 51700 | 62500 | 75300 | 66500 | 76000 | 48900 | 67000 | 491.6 | 1471.8 | 3 | 0.0083 | 5.629 |
| 40S ribosomal protein S19<br>OS=Rattus norvegicus<br>GN=Rps19 PE=2<br>SV=3 | 4 RS19_R<br>AT,sp P39019 RS19_HUMAN,sp Q32PD5 RS19_BOVIN,sp Q5R8M9 RS19_PONAB,sp Q9CZX8 RS19_MOUSE,tr B0ZBD0 B0ZBD0_HUMAN,tr B7SBG1 B7SBG1_AILME,tr D4A6G6 D4A6G6_RAT,tr F1P680 F1P680_CANFA,tr F1RGG1 F1RGG1_PIG,tr F6YV | gGA<br>GVG<br>SMT<br>k | 95% | 48   | 52.06853 | Ref | -0.33 | 0.12 | 0.4  | 0.25  | 0.49 | -0.13 | 0.31 | 9610  | 6640  | 9860  | 13400 | 13300 | 13700 | 9330  | 12600 | 736.9 | 1471.8 | 2 | 0.0055 | 3.71  |

|                                                                            |                                                                                                                                                                                                                           |                                 |     |      |          |     |       |       |      |      |      |       |      |       |       |       |       |       |       |       |       |       |        |   |        |       |
|----------------------------------------------------------------------------|---------------------------------------------------------------------------------------------------------------------------------------------------------------------------------------------------------------------------|---------------------------------|-----|------|----------|-----|-------|-------|------|------|------|-------|------|-------|-------|-------|-------|-------|-------|-------|-------|-------|--------|---|--------|-------|
| 40S ribosomal protein S19<br>OS=Rattus norvegicus<br>GN=Rps19 PE=2<br>SV=3 | 4 RS19_R<br>AT,sp P39019 RS19_HUMAN,sp Q32PD5 RS19_BOVIN,sp Q5R8M9 RS19_PONAB,sp Q9CZX8 RS19_MOUSE,tr B0ZBD0 B0ZBD0_HUMAN,tr B7SBG1 B7SBG1_AILME,tr D4A6G6 D4A6G6_RAT,tr F1P680 F1P680_CANFA,tr F1RGG1 F1RGG1_PIG,tr F6YV | hkEL<br>APY<br>DEN<br>WFY<br>TR | 95% | 53.5 | 54.83075 | Ref | -0.22 | 0.14  | 0.16 | 0.21 | 0.44 | -0.08 | 0.5  | 10900 | 8130  | 11300 | 12900 | 14700 | 15100 | 11000 | 16300 | 645.1 | 2576.3 | 4 | 0.015  | 5.823 |
| 40S ribosomal protein S19<br>OS=Rattus norvegicus<br>GN=Rps19 PE=2<br>SV=3 | 4 RS19_R<br>AT,sp P39019 RS19_HUMAN,sp Q32PD5 RS19_BOVIN,sp Q5R8M9 RS19_PONAB,sp Q9CZX8 RS19_MOUSE,tr B0ZBD0 B0ZBD0_HUMAN,tr B7SBG1 B7SBG1_AILME,tr D4A6G6 D4A6G6_RAT,tr F1P680 F1P680_CANFA,tr F1RGG1 F1RGG1_PIG,tr F6YV | iAGQ<br>VAA<br>ANK              | 95% | 66.8 | 50.51731 | Ref | -0.34 | -0.02 | 0.41 | 0.12 | 0.44 | 0.032 | 0.33 | 17200 | 10500 | 14200 | 21500 | 19400 | 21100 | 16600 | 20300 | 776   | 1549.9 | 2 | 0.0147 | 9.509 |

|                                                                            |                                                                                                                                                                                                                           |                    |     |      |          |     |       |      |      |      |      |       |      |       |       |       |        |        |       |       |        |       |        |   |        |       |
|----------------------------------------------------------------------------|---------------------------------------------------------------------------------------------------------------------------------------------------------------------------------------------------------------------------|--------------------|-----|------|----------|-----|-------|------|------|------|------|-------|------|-------|-------|-------|--------|--------|-------|-------|--------|-------|--------|---|--------|-------|
| 40S ribosomal protein S19<br>OS=Rattus norvegicus<br>GN=Rps19 PE=2<br>SV=3 | 4 RS19_R<br>AT,sp P39019 RS19_HUMAN,sp Q32PD5 RS19_BOVIN,sp Q5R8M9 RS19_PONAB,sp Q9CZX8 RS19_MOUSE,tr B0ZBD0 B0ZBD0_HUMAN,tr B7SBG1 B7SBG1_AILME,tr D4A6G6 D4A6G6_RAT,tr F1P680 F1P680_CANFA,tr F1RGG1 F1RGG1_PIG,tr F6YV | iAGQ<br>VAA<br>ANK | 94% | 47.3 | 50.55562 | Ref | 0.03  | 0.41 | 0.27 | 0.15 | 0.13 | 0.093 | 0.23 | 80000 | 74700 | 1E+05 | 107000 | 109000 | 93700 | 95600 | 104000 | 517.6 | 1549.9 | 3 | 0.0161 | 10.38 |
| 40S ribosomal protein S19<br>OS=Rattus norvegicus<br>GN=Rps19 PE=2<br>SV=3 | 4 RS19_R<br>AT,sp P39019 RS19_HUMAN,sp Q32PD5 RS19_BOVIN,sp Q5R8M9 RS19_PONAB,sp Q9CZX8 RS19_MOUSE,tr B0ZBD0 B0ZBD0_HUMAN,tr B7SBG1 B7SBG1_AILME,tr D4A6G6 D4A6G6_RAT,tr F1P680 F1P680_CANFA,tr F1RGG1 F1RGG1_PIG,tr F6YV | iAGQ<br>VAA<br>ANK | 95% | 65   | 50.1728  | Ref | -0.29 | 0.16 | 0.31 | 0.1  | 0.43 | -0.02 | 0.41 | 8370  | 5780  | 8560  | 10700  | 10200  | 11200 | 8550  | 11400  | 776   | 1549.9 | 2 | 0.0077 | 4.944 |

|                                                                            |                                                                                                                                                                                                                           |                    |     |      |          |     |       |       |      |      |      |       |      |      |      |      |      |      |      |      |      |       |        |   |        |       |
|----------------------------------------------------------------------------|---------------------------------------------------------------------------------------------------------------------------------------------------------------------------------------------------------------------------|--------------------|-----|------|----------|-----|-------|-------|------|------|------|-------|------|------|------|------|------|------|------|------|------|-------|--------|---|--------|-------|
| 40S ribosomal protein S19<br>OS=Rattus norvegicus<br>GN=Rps19 PE=2<br>SV=3 | 4 RS19_R<br>AT,sp P39019 RS19_HUMAN,sp Q32PD5 RS19_BOVIN,sp Q5R8M9 RS19_PONAB,sp Q9CZX8 RS19_MOUSE,tr B0ZBD0 B0ZBD0_HUMAN,tr B7SBG1 B7SBG1_AILME,tr D4A6G6 D4A6G6_RAT,tr F1P680 F1P680_CANFA,tr F1RGG1 F1RGG1_PIG,tr F6YV | rVLQ<br>ALEG<br>Lk | 69% | 30.5 | 47.51756 | Ref | -0.14 | 0.028 | 0.29 | 0.26 | 0.46 | -0.1  | 0.43 | 1780 | 1490 | 1810 | 2440 | 2620 | 2630 | 1860 | 2670 | 579   | 1734.1 | 3 | 0.012  | 6.921 |
| 40S ribosomal protein S19<br>OS=Rattus norvegicus<br>GN=Rps19 PE=2<br>SV=3 | 4 RS19_R<br>AT,sp P39019 RS19_HUMAN,sp Q32PD5 RS19_BOVIN,sp Q5R8M9 RS19_PONAB,sp Q9CZX8 RS19_MOUSE,tr B0ZBD0 B0ZBD0_HUMAN,tr B7SBG1 B7SBG1_AILME,tr D4A6G6 D4A6G6_RAT,tr F1P680 F1P680_CANFA,tr F1RGG1 F1RGG1_PIG,tr F6YV | rVLQ<br>ALEG<br>Lk | 51% | 25   | 47.21531 | Ref | -0.5  | 0.15  | 0.43 | 0.27 | 0.49 | -0.07 | 0.33 | 5670 | 3640 | 6210 | 8460 | 8330 | 8480 | 5990 | 7870 | 434.5 | 1734.1 | 4 | 0.0087 | 4.999 |



|                                                                   |                                                                                                                                                                                                                                |             |     |      |          |     |        |       |      |      |      |       |      |      |      |      |      |      |      |      |      |     |        |   |        |       |
|-------------------------------------------------------------------|--------------------------------------------------------------------------------------------------------------------------------------------------------------------------------------------------------------------------------|-------------|-----|------|----------|-----|--------|-------|------|------|------|-------|------|------|------|------|------|------|------|------|------|-----|--------|---|--------|-------|
| 40S ribosomal protein S19 OS=Rattus norvegicus GN=Rps19 PE=2 SV=3 | 4 RS19_R AT,sp P39019 RS19_HUMAN,sp Q32PD5 RS19_BOVIN,sp Q5R8M9 RS19_PONAB,sp Q9CZX8 RS19_MOUSE, tr B0ZBD0 B0ZBD0_HUMAN, tr B7SBG1 B7SBG1_AILM E, tr D4A6G6 D4A6G6_RAT, tr F1P680 F1P680_C ANFA, tr F1RGG1 F1RGG1_PIG, tr F6YV | rVLQ ALEGLk | 60% | 28.6 | 47.60121 | Ref | -0.036 | -0.03 | 0.12 | 0.17 | 0.75 | -0.14 | 0.24 | 363  | 304  | 332  | 412  | 471  | 615  | 347  | 446  | 579 | 1734.1 | 3 | 0.0148 | 8.511 |
| 40S ribosomal protein S19 OS=Rattus norvegicus GN=Rps19 PE=2 SV=3 | 4 RS19_R AT,sp P39019 RS19_HUMAN,sp Q32PD5 RS19_BOVIN,sp Q5R8M9 RS19_PONAB,sp Q9CZX8 RS19_MOUSE, tr B0ZBD0 B0ZBD0_HUMAN, tr B7SBG1 B7SBG1_AILM E, tr D4A6G6 D4A6G6_RAT, tr F1P680 F1P680_C ANFA, tr F1RGG1 F1RGG1_PIG, tr F6YV | vLQA LEGLk  | 92% | 40.3 | 49.00689 | Ref | -0.13  | 0.13  | 0.37 | 0.18 | 0.27 | -0    | 0.18 | 2900 | 1940 | 2520 | 3360 | 3230 | 3020 | 2600 | 2930 | 790 | 1578   | 2 | 0.0134 | 8.491 |

|                                                                   |                                                                                                                                                                                                                           |   |     |      |          |     |       |       |      |      |      |      |      |      |      |      |      |      |      |      |      |     |      |   |        |       |
|-------------------------------------------------------------------|---------------------------------------------------------------------------------------------------------------------------------------------------------------------------------------------------------------------------|---|-----|------|----------|-----|-------|-------|------|------|------|------|------|------|------|------|------|------|------|------|------|-----|------|---|--------|-------|
| 40S ribosomal protein S19 OS=Rattus norvegicus GN=Rps19 PE=2 SV=3 | 4 RS19_R<br>AT,sp P39019 RS19_HUMAN,sp Q32PD5 RS19_BOVIN,sp Q5R8M9 RS19_PONAB,sp Q9CZX8 RS19_MOUSE,tr B0ZBD0 B0ZBD0_HUMAN,tr B7SBG1 B7SBG1_AILME,tr D4A6G6 D4A6G6_RAT,tr F1P680 F1P680_CANFA,tr F1RGG1 F1RGG1_PIG,tr F6YV | k | 91% | 42.4 | 48.6828  | Ref | -0.12 | -0.01 | 0.36 | 0.1  | 0.21 | 0.33 | 0.23 | 1610 | 1170 | 1370 | 1980 | 1830 | 1720 | 1960 | 1810 | 527 | 1578 | 3 | 0.0095 | 5.987 |
| 40S ribosomal protein S19 OS=Rattus norvegicus GN=Rps19 PE=2 SV=3 | 4 RS19_R<br>AT,sp P39019 RS19_HUMAN,sp Q32PD5 RS19_BOVIN,sp Q5R8M9 RS19_PONAB,sp Q9CZX8 RS19_MOUSE,tr B0ZBD0 B0ZBD0_HUMAN,tr B7SBG1 B7SBG1_AILME,tr D4A6G6 D4A6G6_RAT,tr F1P680 F1P680_CANFA,tr F1RGG1 F1RGG1_PIG,tr F6YV | k | 59% | 29.3 | 48.31761 | Ref | 0.31  | -0.5  | 0.3  | 0.11 | 0.46 | 0.19 | 0.35 | 282  | 339  | 209  | 409  | 395  | 438  | 381  | 423  | 527 | 1578 | 3 | 0.0049 | 3.08  |

|                                                                                            |                                                                                                                                                                                                                       |                   |     |      |          |     |       |       |      |       |       |       |       |       |       |       |       |       |       |       |       |       |        |   |        |       |
|--------------------------------------------------------------------------------------------|-----------------------------------------------------------------------------------------------------------------------------------------------------------------------------------------------------------------------|-------------------|-----|------|----------|-----|-------|-------|------|-------|-------|-------|-------|-------|-------|-------|-------|-------|-------|-------|-------|-------|--------|---|--------|-------|
| 40S ribosomal protein S19 OS=Rattus norvegicus GN=Rps19 PE=2 SV=3                          | 4 RS19_RAT,sp P39019 RS19_HUMAN,sp Q32PD5 RS19_BOVIN,sp Q5R8M9 RS19_PONAB,sp Q9CZX8 RS19_MOUSE,tr B0ZBD0 B0ZBD0_HUMAN,tr B7SBG1 B7SBG1_AILME,tr D4A6G6 D4A6G6_RAT,tr F1P680 F1P680_CANFA,tr F1RGG1 F1RGG1_PIG,tr F6YV | VPE<br>WVD<br>TVk | 95% | 52.6 | 52.75763 | Ref | -0.27 | 0.13  | 0.34 | 0.13  | 0.42  | -0.13 | 0.34  | 16400 | 10400 | 14800 | 19300 | 18400 | 19600 | 14000 | 19200 | 841   | 1680   | 2 | 0.0103 | 6.157 |
| Heterogeneous nuclear ribonucleoproteins A2/B1 OS=Rattus norvegicus GN=Hnrnpa2b1 PE=1 SV=1 | 2 ROA2_RAT,sp O88569 ROA2_MOUSE,sp P22626 ROA2_HUMAN,sp Q2HJ60 ROA2_BOVIN,sp Q9TTV2 ROA2_SAGOE,tr B7ZP22 B7ZP22_MOUSE,tr D2GVC7 D2GVC7_AILME,tr E2QXD3 E2QXD3_CANFA,tr F1LM82 F1LM82_RAT,tr F                         | eDTE<br>EHHL<br>R | 62% | 30.6 | 49.49209 | Ref | 0.48  | -0.14 | -0.4 | -0.36 | -0.01 | -0.58 | -0.14 | 2910  | 3070  | 2160  | 2040  | 2310  | 2570  | 1800  | 2430  | 735.4 | 1468.7 | 2 | 0.0129 | 8.789 |

|                                                                                            |                                                                                                                                                                                                                         |                    |     |      |          |     |      |       |       |       |       |       |       |       |       |       |      |       |       |       |       |       |        |   |        |       |
|--------------------------------------------------------------------------------------------|-------------------------------------------------------------------------------------------------------------------------------------------------------------------------------------------------------------------------|--------------------|-----|------|----------|-----|------|-------|-------|-------|-------|-------|-------|-------|-------|-------|------|-------|-------|-------|-------|-------|--------|---|--------|-------|
| Heterogeneous nuclear ribonucleoproteins A2/B1 OS=Rattus norvegicus GN=Hnrnpa2b1 PE=1 SV=1 | 2 ROA2_RAT,sp O88569 ROA2_MOUSE,sp P22626 ROA2_HUMAN,sp Q2HJ60 ROA2_BOVIN,sp Q9TTV2 ROA2_SAGOE,tr B7ZP22 B7ZP22_MOUSE,SE,tr D2GVC7 D2GVC7_AILME,tr E2QXD3 E2QXD3_CANFA,tr E2QXF7 E2QXF7_CANFA,tr F1LM82 F1LM82_RAT,tr F | eDTE EHHL          | 93% | 42.4 | 49.68996 | Ref | 0.77 | 0.23  | 2623) | -0.23 | 692)  | -0.24 | 0.026 | 9740  | 11800 | 8860  | 623) | 7960  | 8692) | 7210  | 8600  | 368.2 | 1468.7 | 4 | 0.0096 | 6.565 |
| Heterogeneous nuclear ribonucleoproteins A2/B1 OS=Rattus norvegicus GN=Hnrnpa2b1 PE=1 SV=1 | 2 ROA2_RAT,sp O88569 ROA2_MOUSE,sp P22626 ROA2_HUMAN,sp Q2HJ60 ROA2_BOVIN,sp Q9TTV2 ROA2_SAGOE,tr B7ZP22 B7ZP22_MOUSE,SE,tr D2GVC7 D2GVC7_AILME,tr E2QXD3 E2QXD3_CANFA,tr E2QXF7 E2QXF7_CANFA,tr F1LM82 F1LM82_RAT,tr F | gFGF VTFD DHD PVDK | 95% | 56.1 | 53.77512 | Ref | 0.4  | -0.05 | -0.38 | -0.2  | -0.08 | -0.23 | -0.25 | 12200 | 14200 | 11300 | 9990 | 12500 | 11900 | 11200 | 11000 | 768.7 | 2303.1 | 3 | 0.0226 | 9.818 |

|                                                                                                   |                                                                                                                                                                                                                                                                             |                                            |     |      |          |     |        |       |       |       |       |       |       |      |      |      |      |      |      |      |      |       |        |   |        |       |
|---------------------------------------------------------------------------------------------------|-----------------------------------------------------------------------------------------------------------------------------------------------------------------------------------------------------------------------------------------------------------------------------|--------------------------------------------|-----|------|----------|-----|--------|-------|-------|-------|-------|-------|-------|------|------|------|------|------|------|------|------|-------|--------|---|--------|-------|
| <p>Heterogeneous nuclear ribonucleoproteins A2/B1 OS=Rattus norvegicus GN=Hnrnpa2b1 PE=1 SV=1</p> | <p>2 ROA2_RAT,sp O88569 ROA2_MOUSE,sp P22626 ROA2_HUMAN,sp Q2HJ60 ROA2_BOVIN,sp Q9TTV2 ROA2_SAGOE,transcript B7ZP22 B7ZP22_MOUSE,transcript D2GVC7 D2GVC7_AILME,transcript E2QXD3 E2QXD3_CANFA,transcript E2QXF7 E2QXF7_CANFA,transcript F1LM82 F1LM82_RAT,transcript F</p> | <p>gFGF<br/>VTFD<br/>DHD<br/>PVDk</p>      | 95% | 61.5 | 53.87883 | Ref | 0.16   | 0.073 | -0.3  | -0.34 | -0.14 | -0.19 | -0.03 | 7390 | 7040 | 7170 | 6230 | 6670 | 6690 | 6730 | 7450 | 768.7 | 2303.1 | 3 | 0.0194 | 8.398 |
| <p>Heterogeneous nuclear ribonucleoproteins A2/B1 OS=Rattus norvegicus GN=Hnrnpa2b1 PE=1 SV=1</p> | <p>2 ROA2_RAT,sp O88569 ROA2_MOUSE,sp P22626 ROA2_HUMAN,sp Q2HJ60 ROA2_BOVIN,sp Q9TTV2 ROA2_SAGOE,transcript B7ZP22 B7ZP22_MOUSE,transcript D2GVC7 D2GVC7_AILME,transcript E2QXD3 E2QXD3_CANFA,transcript E2QXF7 E2QXF7_CANFA,transcript F1LM82 F1LM82_RAT,transcript F</p> | <p>gGG<br/>GNF<br/>GPG<br/>PGS<br/>NFR</p> | 64% | 32.3 | 50.81297 | Ref | 0.0002 | -0.05 | -0.19 | -0.23 | 0.076 | -0.23 | -0.03 | 8300 | 7400 | 7760 | 7920 | 8470 | 9140 | 7740 | 8810 | 841.4 | 1680.8 | 2 | 0.014  | 8.337 |

|                                                                                                              |                                                                                                                                                                                                                       |                        |     |      |          |     |      |       |       |       |       |       |       |       |       |       |       |       |       |       |       |       |        |   |        |       |
|--------------------------------------------------------------------------------------------------------------|-----------------------------------------------------------------------------------------------------------------------------------------------------------------------------------------------------------------------|------------------------|-----|------|----------|-----|------|-------|-------|-------|-------|-------|-------|-------|-------|-------|-------|-------|-------|-------|-------|-------|--------|---|--------|-------|
| Heterogeneous<br>nuclear<br>ribonucleoproteins<br>A2/B1 OS=Rattus<br>norvegicus<br>GN=Hnrnpa2b1<br>PE=1 SV=1 | 2 ROA2_ RAT,sp O88569 ROA2_MOUSE,sp P22626 ROA2_HUMAN,sp Q2HJ60 ROA2_BOVIN,sp Q9TTV2 ROA2_SAGOE,tr B7ZP22 B7ZP22_MOUSE,tr D2GVC7 D2GVC7_AILME,tr E2QXD3 E2QXD3_CANFA,tr E2QXF7 E2QXF7_CANFA,tr F1LM82 F1LM82_RAT,tr F | gGN<br>FGF<br>GDS<br>R | 91% | 39.5 | 48.59222 | Ref | 0.18 | 0.045 | -0.37 | -0.23 | -0.12 | -0.2  | -0.08 | 19100 | 18100 | 17900 | 15100 | 18300 | 17200 | 17100 | 18400 | 659.3 | 1316.6 | 2 | 0.0121 | 9.157 |
|                                                                                                              |                                                                                                                                                                                                                       |                        | 95% | 75.7 | 54.07671 | Ref | 0.38 | -0.18 | -0.46 | -0.27 | 0.012 | -0.18 | -0.14 | 6810  | 7550  | 5530  | 5110  | 6420  | 6830  | 6260  | 6360  | 845.8 | 2534.4 | 3 | 0.0175 | 6.904 |

|                                                                                            |                                                                                                                                                                                                                         |                              |     |      |          |     |      |       |       |       |       |       |       |     |     |     |     |     |     |     |     |       |        |   |        |       |
|--------------------------------------------------------------------------------------------|-------------------------------------------------------------------------------------------------------------------------------------------------------------------------------------------------------------------------|------------------------------|-----|------|----------|-----|------|-------|-------|-------|-------|-------|-------|-----|-----|-----|-----|-----|-----|-----|-----|-------|--------|---|--------|-------|
| Heterogeneous nuclear ribonucleoproteins A2/B1 OS=Rattus norvegicus GN=Hnrnpa2b1 PE=1 SV=1 | 2 ROA2_RAT,sp O88569 ROA2_MOUSE,sp P22626 ROA2_HUMAN,sp Q2HJ60 ROA2_BOVIN,sp Q9TTV2 ROA2_SAGOE,tr B7ZP22 B7ZP22_MOUSE,SE,tr D2GVC7 D2GVC7_AILME,tr E2QXD3 E2QXD3_CANFA,tr E2QXF7 E2QXF7_CANFA,tr F1LM82 F1LM82_RAT,tr F | KLFI<br>GGLS<br>FETT<br>EESL | 95% | 62   | 54.01361 | Ref | 0.27 | -0.06 | -0.26 | -0.31 | 0.11  | -0.22 | -0.1  | 486 | 585 | 505 | 492 | 525 | 611 | 510 | 550 | 845.8 | 2534.4 | 3 | 0.0142 | 5.602 |
| Heterogeneous nuclear ribonucleoproteins A2/B1 OS=Rattus norvegicus GN=Hnrnpa2b1 PE=1 SV=1 | 2 ROA2_RAT,sp O88569 ROA2_MOUSE,sp P22626 ROA2_HUMAN,sp Q2HJ60 ROA2_BOVIN,sp Q9TTV2 ROA2_SAGOE,tr B7ZP22 B7ZP22_MOUSE,SE,tr D2GVC7 D2GVC7_AILME,tr E2QXD3 E2QXD3_CANFA,tr E2QXF7 E2QXF7_CANFA,tr F1LM82 F1LM82_RAT,tr F | KLFI<br>GGLS<br>FETT<br>EESL | 95% | 64.5 | 54.01361 | Ref | 0.26 | -0.23 | -0.29 | -0.23 | 0.005 | -0.08 | -0.03 | 595 | 680 | 525 | 564 | 648 | 667 | 658 | 673 | 845.8 | 2534.4 | 3 | 0.0142 | 5.602 |

|                                                                                            |                                                                                                                                                                                                                         |                              |     |      |          |     |      |       |       |       |       |       |       |       |       |       |       |       |       |       |       |       |        |   |        |       |
|--------------------------------------------------------------------------------------------|-------------------------------------------------------------------------------------------------------------------------------------------------------------------------------------------------------------------------|------------------------------|-----|------|----------|-----|------|-------|-------|-------|-------|-------|-------|-------|-------|-------|-------|-------|-------|-------|-------|-------|--------|---|--------|-------|
| Heterogeneous nuclear ribonucleoproteins A2/B1 OS=Rattus norvegicus GN=Hnrnpa2b1 PE=1 SV=1 | 2 ROA2_RAT,sp O88569 ROA2_MOUSE,sp P22626 ROA2_HUMAN,sp Q2HJ60 ROA2_BOVIN,sp Q9TTV2 ROA2_SAGOE,tr B7ZP22 B7ZP22_MOUSE,SE,tr D2GVC7 D2GVC7_AILME,tr E2QXD3 E2QXD3_CANFA,tr E2QXF7 E2QXF7_CANFA,tr F1LM82 F1LM82_RAT,tr F | KLF1<br>GGLS<br>FETT<br>EESL | 95% | 64.6 | 53.95838 | Ref | 0.12 | -0.06 | -0.07 | -0.11 | -0.26 | -0.19 | -0.21 | 1100  | 974   | 934   | 1040  | 1120  | 876   | 963   | 941   | 845.8 | 2534.4 | 3 | 0.0107 | 4.23  |
|                                                                                            | 2 ROA2_RAT,sp O88569 ROA2_MOUSE,sp P22626 ROA2_HUMAN,sp Q2HJ60 ROA2_BOVIN,sp Q9TTV2 ROA2_SAGOE,tr B7ZP22 B7ZP22_MOUSE,SE,tr D2GVC7 D2GVC7_AILME,tr E2QXD3 E2QXD3_CANFA,tr E2QXF7 E2QXF7_CANFA,tr F1LM82 F1LM82_RAT,tr F | KLFV<br>GGIK<br>EDTE<br>EHHL | 94% | 45.1 | 53.01317 | Ref | 0.3  | -0.14 | -0.53 | -0.22 | -0.04 | -0.01 | -0.13 | 30500 | 32900 | 26400 | 22500 | 30800 | 30400 | 32400 | 29500 | 584.9 | 2919.6 | 5 | 0.0216 | 7.385 |



|                                                                                            |                                                                                                                                                                                                                  |                              |     |      |          |     |      |       |       |        |       |       |       |       |       |      |      |      |      |      |      |       |        |  |   |        |       |  |  |  |  |  |  |  |  |  |  |  |  |  |  |  |  |  |  |
|--------------------------------------------------------------------------------------------|------------------------------------------------------------------------------------------------------------------------------------------------------------------------------------------------------------------|------------------------------|-----|------|----------|-----|------|-------|-------|--------|-------|-------|-------|-------|-------|------|------|------|------|------|------|-------|--------|--|---|--------|-------|--|--|--|--|--|--|--|--|--|--|--|--|--|--|--|--|--|--|
| Heterogeneous nuclear ribonucleoproteins A2/B1 OS=Rattus norvegicus GN=Hnrnpa2b1 PE=1 SV=1 | 2 ROA2_                                                                                                                                                                                                          |                              |     |      |          |     |      |       |       |        |       |       |       |       |       |      |      |      |      |      |      |       |        |  |   |        |       |  |  |  |  |  |  |  |  |  |  |  |  |  |  |  |  |  |  |
|                                                                                            | RAT,sp O88569 ROA2_MOUSE,sp P22626 ROA2_HUMAN,sp Q2HJ60 ROA2_BOVIN,sp Q9TTV2 ROA2_SAGOE,tr B7ZP22 B7ZP22_MOUSE,SE,tr D2GVC7 D2GVC7_AILME,tr E2QXD3 E2QXD3_CANFA,tr E2QXF7 E2QXF7_CANFA,tr F1LM82 F1LM82_RAT,tr F | IFIG<br>GLSF<br>ETTE<br>ESLR | 79% | 39.9 | 54.06739 | Ref | 0.15 | -0.4  | 0.021 | -0.082 | -0.16 | -0.31 | 0.16  | 3100  | 3250  | 2410 | 3620 | 3710 | 3070 | 2880 | 3980 | 701.7 | 2102.1 |  | 3 | 0.0169 | 8.055 |  |  |  |  |  |  |  |  |  |  |  |  |  |  |  |  |  |  |
| Heterogeneous nuclear ribonucleoproteins A2/B1 OS=Rattus norvegicus GN=Hnrnpa2b1 PE=1 SV=1 | 2 ROA2_                                                                                                                                                                                                          |                              |     |      |          |     |      |       |       |        |       |       |       |       |       |      |      |      |      |      |      |       |        |  |   |        |       |  |  |  |  |  |  |  |  |  |  |  |  |  |  |  |  |  |  |
|                                                                                            | RAT,sp O88569 ROA2_MOUSE,sp P22626 ROA2_HUMAN,sp Q2HJ60 ROA2_BOVIN,sp Q9TTV2 ROA2_SAGOE,tr B7ZP22 B7ZP22_MOUSE,SE,tr D2GVC7 D2GVC7_AILME,tr E2QXD3 E2QXD3_CANFA,tr E2QXF7 E2QXF7_CANFA,tr F1LM82 F1LM82_RAT,tr F | IFVG<br>Gik                  | 68% | 27.6 | 45.00676 | Ref | 0.45 | -0.13 | -0.4  | -0.41  | -0.14 | -0.4  | -0.26 | 13600 | 12600 | 9140 | 8500 | 9310 | 9830 | 8550 | 9360 | 448   | 1340.9 |  | 3 | 0.0027 | 2.018 |  |  |  |  |  |  |  |  |  |  |  |  |  |  |  |  |  |  |

|                                                                                                   |                                                                                                                                                                                                                                                                             |                     |            |             |                 |            |             |              |              |               |              |              |              |             |             |             |             |             |             |             |             |              |               |          |               |              |
|---------------------------------------------------------------------------------------------------|-----------------------------------------------------------------------------------------------------------------------------------------------------------------------------------------------------------------------------------------------------------------------------|---------------------|------------|-------------|-----------------|------------|-------------|--------------|--------------|---------------|--------------|--------------|--------------|-------------|-------------|-------------|-------------|-------------|-------------|-------------|-------------|--------------|---------------|----------|---------------|--------------|
| <p>Heterogeneous nuclear ribonucleoproteins A2/B1 OS=Rattus norvegicus GN=Hnrnpa2b1 PE=1 SV=1</p> | <p>2 ROA2_RAT,sp O88569 ROA2_MOUSE,sp P22626 ROA2_HUMAN,sp Q2HJ60 ROA2_BOVIN,sp Q9TTV2 ROA2_SAGOE,transcript B7ZP22 B7ZP22_MOUSE,transcript D2GVC7 D2GVC7_AILME,transcript E2QXD3 E2QXD3_CANFA,transcript E2QXF7 E2QXF7_CANFA,transcript F1LM82 F1LM82_RAT,transcript F</p> | <p>nYYE QW Gk</p>   | <p>54%</p> | <p>32.4</p> | <p>52.53088</p> | <p>Ref</p> | <p>0.26</p> | <p>-0.04</p> | <p>-0.39</p> | <p>-0.29</p>  | <p>0.058</p> | <p>-0.23</p> | <p>-0.1</p>  | <p>6680</p> | <p>7010</p> | <p>6200</p> | <p>5440</p> | <p>6440</p> | <p>7150</p> | <p>6100</p> | <p>6630</p> | <p>848.4</p> | <p>1694.9</p> | <p>2</p> | <p>0.0202</p> | <p>11.93</p> |
| <p>Heterogeneous nuclear ribonucleoproteins A2/B1 OS=Rattus norvegicus GN=Hnrnpa2b1 PE=1 SV=1</p> | <p>2 ROA2_RAT,sp O88569 ROA2_MOUSE,sp P22626 ROA2_HUMAN,sp Q2HJ60 ROA2_BOVIN,sp Q9TTV2 ROA2_SAGOE,transcript B7ZP22 B7ZP22_MOUSE,transcript D2GVC7 D2GVC7_AILME,transcript E2QXD3 E2QXD3_CANFA,transcript E2QXF7 E2QXF7_CANFA,transcript F1LM82 F1LM82_RAT,transcript F</p> | <p>qEM QEV QSSR</p> | <p>79%</p> | <p>34.9</p> | <p>50.06411</p> | <p>Ref</p> | <p>0.24</p> | <p>-0.09</p> | <p>-0.51</p> | <p>-0.044</p> | <p>0.001</p> | <p>-0.31</p> | <p>-0.07</p> | <p>4510</p> | <p>4640</p> | <p>3980</p> | <p>3350</p> | <p>5090</p> | <p>4590</p> | <p>3870</p> | <p>4540</p> | <p>763.4</p> | <p>1524.7</p> | <p>2</p> | <p>0.0112</p> | <p>7.34</p>  |

|                                                                                                   |                                                                                                                                                                                                                                |                     |            |             |                 |            |              |              |              |               |              |              |              |              |              |              |              |              |              |              |              |              |               |          |               |              |
|---------------------------------------------------------------------------------------------------|--------------------------------------------------------------------------------------------------------------------------------------------------------------------------------------------------------------------------------|---------------------|------------|-------------|-----------------|------------|--------------|--------------|--------------|---------------|--------------|--------------|--------------|--------------|--------------|--------------|--------------|--------------|--------------|--------------|--------------|--------------|---------------|----------|---------------|--------------|
| <p>Heterogeneous nuclear ribonucleoproteins A2/B1 OS=Rattus norvegicus GN=Hnrnpa2b1 PE=1 SV=1</p> | <p>2 ROA2_RAT,sp O88569 ROA2_MOUSE,sp P22626 ROA2_HUMAN,sp Q2HJ60 ROA2_BOVIN,sp Q9TTV2 ROA2_SAGOE,tr B7ZP22 B7ZP22_MOUSE,SE,tr D2GVC7 D2GVC7_AILME,tr E2QXD3 E2QXD3_CANFA,tr E2QXF7 E2QXF7_CANFA,tr F1LM82 F1LM82_RAT,tr F</p> | <p>yHTInGHNAEVR</p> | <p>95%</p> | <p>50.4</p> | <p>51.96179</p> | <p>Ref</p> | <p>0.091</p> | <p>-0.25</p> | <p>-0.41</p> | <p>-0.032</p> | <p>0.002</p> | <p>-0.05</p> | <p>-0.06</p> | <p>2710</p>  | <p>2510</p>  | <p>2150</p>  | <p>2170</p>  | <p>3100</p>  | <p>2770</p>  | <p>2800</p>  | <p>2740</p>  | <p>858.4</p> | <p>1714.9</p> | <p>2</p> | <p>0.0106</p> | <p>6.17</p>  |
| <p>Heterogeneous nuclear ribonucleoproteins A2/B1 OS=Rattus norvegicus GN=Hnrnpa2b1 PE=1 SV=1</p> | <p>2 ROA2_RAT,sp O88569 ROA2_MOUSE,sp P22626 ROA2_HUMAN,sp Q2HJ60 ROA2_BOVIN,sp Q9TTV2 ROA2_SAGOE,tr B7ZP22 B7ZP22_MOUSE,SE,tr D2GVC7 D2GVC7_AILME,tr E2QXD3 E2QXD3_CANFA,tr E2QXF7 E2QXF7_CANFA,tr F1LM82 F1LM82_RAT,tr F</p> | <p>yHTInGHNAEVR</p> | <p>85%</p> | <p>40.4</p> | <p>53.94537</p> | <p>Ref</p> | <p>0.08</p>  | <p>-0.13</p> | <p>-0.35</p> | <p>-0.18</p>  | <p>0.013</p> | <p>-0.06</p> | <p>-0.06</p> | <p>49900</p> | <p>45800</p> | <p>42800</p> | <p>41400</p> | <p>51300</p> | <p>51200</p> | <p>50800</p> | <p>50700</p> | <p>505.8</p> | <p>2019.1</p> | <p>4</p> | <p>0.0159</p> | <p>7.862</p> |

|                                                            |                                                                                                                                                                                                                             |          |     |      |          |     |      |                        |       |       |      |       |       |     |                        |     |     |     |     |     |     |       |        |   |        |       |
|------------------------------------------------------------|-----------------------------------------------------------------------------------------------------------------------------------------------------------------------------------------------------------------------------|----------|-----|------|----------|-----|------|------------------------|-------|-------|------|-------|-------|-----|------------------------|-----|-----|-----|-----|-----|-----|-------|--------|---|--------|-------|
| 14-3-3 protein zeta/delta OS=Ovis aries GN=YWHAZ PE=1 SV=1 | 1 1433Z_SHEEP,sp P63101 1433Z_MOUSE,sp P63102 1433Z_RAT,sp P63103 1433Z_BOVIN,sp P63104 1433Z_HUMAN,sp Q5R651 1433Z_POB,sp D0PNI1 D0PNI1_HUMAN,sp D2GY30 D2GY30_AILME,sp F1PBL1 F1PBL1_CANFA,sp F2Z558 F2Z558_PIG,sp F1LLEK | dicNDVLS | 82% | 41.2 | 53.94707 | Ref | 0.57 | -0.24                  | -0.09 | -0.31 | -0.1 | -0.23 | -0.66 | 498 | 478                    | 297 | 369 | 349 | 354 | 336 | 249 | 672.7 | 2015.1 | 3 | 0.0157 | 7.801 |
| 14-3-3 protein zeta/delta OS=Ovis aries GN=YWHAZ PE=1 SV=1 | 1 1433Z_SHEEP,sp P63101 1433Z_MOUSE,sp P63102 1433Z_RAT,sp P63103 1433Z_BOVIN,sp P63104 1433Z_HUMAN,sp Q5R651 1433Z_POB,sp D0PNI1 D0PNI1_HUMAN,sp D2GY30 D2GY30_AILME,sp F1PBL1 F1PBL1_CANFA,sp F2Z558 F2Z558_PIG,sp F1LLEK | dicNDVLS | 67% | 36.4 | 53.98743 | Ref | 0.61 | Value Missing (-1.586) | 0.3   | -0.39 | 0.22 | 0.085 | -0.47 | 280 | Value Missing (-1.586) | 359 | 352 | 240 | 320 | 304 | 205 | 672.7 | 2015.1 | 3 | 0.002  | 0.986 |

|                                                            |                                                                                                                                                                                                                               |                    |     |    |          |     |      |       |      |        |       |       |       |       |       |       |       |       |       |       |       |       |        |   |        |       |
|------------------------------------------------------------|-------------------------------------------------------------------------------------------------------------------------------------------------------------------------------------------------------------------------------|--------------------|-----|----|----------|-----|------|-------|------|--------|-------|-------|-------|-------|-------|-------|-------|-------|-------|-------|-------|-------|--------|---|--------|-------|
| 14-3-3 protein zeta/delta OS=Ovis aries GN=YWHAZ PE=1 SV=1 | 1 1433Z_SHEEP,sp P63101 1433Z_MOUSE,sp P63102 1433Z_RAT,sp P63103 1433Z_BOVIN,sp P63104 1433Z_HUMAN,sp Q5R651 1433Z_POB,sp D00PNI1 D00PNI1_HUMAN,sp D02GY30 D2GY30_AILME,sp F1PBL1 F1PBL1_CANFAL1,sp F2Z558 F2Z558_PIG,sp F1R | dSTLI<br>MQL<br>LR | 95% | 54 | 51.78658 | Ref | 0.44 | -0.07 | 0.11 | -0.22  | -0.12 | -0.23 | -0.24 | 956   | 1150  | 878   | 1120  | 976   | 914   | 885   | 873   | 498.6 | 1492.8 | 3 | 0.0153 | 10.22 |
| 14-3-3 protein zeta/delta OS=Ovis aries GN=YWHAZ PE=1 SV=1 | 1 1433Z_SHEEP,sp P63101 1433Z_MOUSE,sp P63102 1433Z_RAT,sp P63103 1433Z_BOVIN,sp P63104 1433Z_HUMAN,sp Q5R651 1433Z_POB,sp D00PNI1 D00PNI1_HUMAN,sp D02GY30 D2GY30_AILME,sp F1PBL1 F1PBL1_CANFAL1,sp F2Z558 F2Z558_PIG,sp F1R | eMQ<br>PTHP<br>IR  | 77% | 37 | 51.75558 | Ref | 0.3  | -0.3  | 0.12 | -0.009 | 0.16  | -0.39 | -0.05 | 41000 | 51300 | 36700 | 55000 | 55400 | 54500 | 38900 | 48800 | 471.6 | 1411.7 | 3 | 0.0125 | 8.858 |

|                                                                     |                                                                                                                                                                                                                                                                                                                                  |                                    |     |      |          |     |      |       |       |       |       |       |       |       |       |       |       |       |       |       |       |       |        |   |        |       |
|---------------------------------------------------------------------|----------------------------------------------------------------------------------------------------------------------------------------------------------------------------------------------------------------------------------------------------------------------------------------------------------------------------------|------------------------------------|-----|------|----------|-----|------|-------|-------|-------|-------|-------|-------|-------|-------|-------|-------|-------|-------|-------|-------|-------|--------|---|--------|-------|
| 14-3-3 protein<br>zeta/delta OS=Ovis<br>aries GN=YWHAZ<br>PE=1 SV=1 | 1 1433Z_<br>SHEEP,sp <br>P63101 1<br>433Z_MO<br>USE,sp P6<br>3102 143<br>3Z_RAT,s<br>p P63103<br> 1433Z_B<br>OVIN,sp <br>P63104 1<br>433Z_HU<br>MAN,sp <br>Q5R651 1<br>433Z_PO<br>NAB,tr D<br>OPNI1 D0<br>PNI1_HU<br>MAN,tr D<br>2GY30 D2<br>GY30_AIL<br>ME,tr F1P<br>BL1 F1PB<br>L1_CANFA<br>,tr F2Z55<br>8 F2Z558<br>_PIG,tr F | g VD<br>QSQ<br>QAY<br>QEA<br>FEISk | 95% | 79.8 | 55.18247 | Ref | 0.28 | -0.1  | 0.054 | 0.086 | 0.22  | -0.56 | -0.33 | 11500 | 12700 | 10500 | 13200 | 14900 | 14200 | 8640  | 10100 | 883.8 | 2648.4 | 3 | 0.0179 | 6.767 |
| 14-3-3 protein<br>zeta/delta OS=Ovis<br>aries GN=YWHAZ<br>PE=1 SV=1 | 1 1433Z_<br>SHEEP,sp <br>P63101 1<br>433Z_MO<br>USE,sp P6<br>3102 143<br>3Z_RAT,s<br>p P63103<br> 1433Z_B<br>OVIN,sp <br>P63104 1<br>433Z_HU<br>MAN,sp <br>Q5R651 1<br>433Z_PO<br>NAB,tr D<br>OPNI1 D0<br>PNI1_HU<br>MAN,tr D<br>2GY30 D2<br>GY30_AIL<br>ME,tr F1P<br>BL1 F1PB<br>L1_CANFA<br>,tr F2Z55<br>8 F2Z558<br>_PIG,tr F | g VD<br>QSQ<br>QAY<br>QEA<br>FEISk | 95% | 70.6 | 55.19369 | Ref | 0.24 | -0.19 | -0.21 | -0.16 | 0.024 | -0.01 | 0.064 | 10300 | 10900 | 8810  | 9730  | 11100 | 11000 | 11200 | 11700 | 663.1 | 2648.4 | 4 | 0.017  | 6.403 |

|                                                                     |                                                                                                                                                                                                                                                                                                                                  |                                    |    |     |      |          |     |       |      |       |      |       |       |       |      |      |      |      |      |      |      |      |       |        |   |        |       |
|---------------------------------------------------------------------|----------------------------------------------------------------------------------------------------------------------------------------------------------------------------------------------------------------------------------------------------------------------------------------------------------------------------------|------------------------------------|----|-----|------|----------|-----|-------|------|-------|------|-------|-------|-------|------|------|------|------|------|------|------|------|-------|--------|---|--------|-------|
| 14-3-3 protein<br>zeta/delta OS=Ovis<br>aries GN=YWHAZ<br>PE=1 SV=1 | 1 1433Z_<br>SHEEP,sp <br>P63101 1<br>433Z_MO<br>USE,sp P6<br>3102 143<br>3Z_RAT,s<br>p P63103<br> 1433Z_B<br>OVIN,sp <br>P63104 1<br>433Z_HU<br>MAN,sp <br>Q5R651 1<br>433Z_PO<br>NAB,tr D<br>OPNI1 D0<br>PNI1_HU<br>MAN,tr D<br>2GY30 D2<br>GY30_AIL<br>ME,tr F1P<br>BL1 F1PB<br>L1_CANFA<br>,tr F2Z55<br>8 F2Z558<br>_PIG,tr F | gIVD<br>QSQ<br>QAY<br>QEA<br>FEISK | k  | 82% | 40.5 | 55.15419 | Ref | -0.19 | -0.3 | 0.016 | 0.12 | 0.27  | 0.074 | 0.081 | 2660 | 2740 | 2750 | 3850 | 4560 | 4400 | 4020 | 4020 | 771.2 | 3080.7 | 4 | 0.0311 | 10.1  |
| 14-3-3 protein<br>zeta/delta OS=Ovis<br>aries GN=YWHAZ<br>PE=1 SV=1 | 1 1433Z_<br>SHEEP,sp <br>P63101 1<br>433Z_MO<br>USE,sp P6<br>3102 143<br>3Z_RAT,s<br>p P63103<br> 1433Z_B<br>OVIN,sp <br>P63104 1<br>433Z_HU<br>MAN,sp <br>Q5R651 1<br>433Z_PO<br>NAB,tr D<br>OPNI1 D0<br>PNI1_HU<br>MAN,tr D<br>2GY30 D2<br>GY30_AIL<br>ME,tr F1P<br>BL1 F1PB<br>L1_CANFA<br>,tr F2Z55<br>8 F2Z558<br>_PIG,tr F | kGIV<br>DQS<br>QQA<br>YQE<br>AFEI  | Sk | 91% | 46.4 | 55.05591 | Ref | 0.13  | -0.3 | -0.1  | 0.13 | -0.04 | -0.11 | -0.09 | 2950 | 2650 | 2120 | 2750 | 3550 | 2760 | 2740 | 2770 | 771.2 | 3080.7 | 4 | 0.0265 | 8.599 |

|                                                            |                                                                                                                                                                                                                           |      |     |      |          |     |       |       |       |       |      |       |       |       |        |       |        |        |       |       |        |     |        |   |        |       |
|------------------------------------------------------------|---------------------------------------------------------------------------------------------------------------------------------------------------------------------------------------------------------------------------|------|-----|------|----------|-----|-------|-------|-------|-------|------|-------|-------|-------|--------|-------|--------|--------|-------|-------|--------|-----|--------|---|--------|-------|
| 14-3-3 protein zeta/delta OS=Ovis aries GN=YWHAZ PE=1 SV=1 | 1 1433Z_SHEEP,sp P63101 1433Z_MOUSE,sp P63102 1433Z_RAT,sp P63103 1433Z_BOVIN,sp P63104 1433Z_HUMAN,sp Q5R651 1433Z_POONAB,tr DOPNI1 DOPNI1_HUMAN,tr D2GY30 D2GY30_AILME,tr F1PBL1 F1PBL1_CANFA,tr F2Z558 F2Z558_PIG,tr F | nLLS | 70% | 33.9 | 50.6875  | Ref | 0.097 | -0.39 | 0.14  | -0.14 | 0.33 | -0.3  | -0.11 | 1E+05 | 126000 | 97300 | 157000 | 143000 | 2E+05 | 1E+05 | 133000 | 506 | 1514.9 | 3 | 0.018  | 11.88 |
| 14-3-3 protein zeta/delta OS=Ovis aries GN=YWHAZ PE=1 SV=1 | 1 1433Z_SHEEP,sp P63101 1433Z_MOUSE,sp P63102 1433Z_RAT,sp P63103 1433Z_BOVIN,sp P63104 1433Z_HUMAN,sp Q5R651 1433Z_POONAB,tr DOPNI1 DOPNI1_HUMAN,tr D2GY30 D2GY30_AILME,tr F1PBL1 F1PBL1_CANFA,tr F2Z558 F2Z558_PIG,tr F | nLLS | 65% | 33.1 | 51.06181 | Ref | 0.23  | -0.37 | 0.082 | -0.06 | 0.12 | -0.06 | -0.31 | 3960  | 3980   | 2850  | 4370   | 4360   | 4320  | 3980  | 3330   | 506 | 1514.9 | 3 | 0.0255 | 16.85 |



|                                                            |                                                                                                                                                                                                                           |              |     |      |          |     |       |       |       |        |       |       |       |       |       |      |       |       |       |       |       |       |        |   |        |       |
|------------------------------------------------------------|---------------------------------------------------------------------------------------------------------------------------------------------------------------------------------------------------------------------------|--------------|-----|------|----------|-----|-------|-------|-------|--------|-------|-------|-------|-------|-------|------|-------|-------|-------|-------|-------|-------|--------|---|--------|-------|
| 14-3-3 protein zeta/delta OS=Ovis aries GN=YWHAZ PE=1 SV=1 | 1 1433Z_SHEEP,sp P63101 1433Z_MOUSE,sp P63102 1433Z_RAT,sp P63103 1433Z_BOVIN,sp P63104 1433Z_HUMAN,sp Q5R651 1433Z_POONAB,tr DOPNI1 DOPNI1_HUMAN,tr D2GY30 D2GY30_AILME,tr F1PBL1 F1PBL1_CANFA,tr F2Z558 F2Z558_PIG,tr F | nLLS<br>VAYk | 79% | 36.1 | 50.20879 | Ref | 0.11  | -0.23 | 0.019 | -0.2   | 0.072 | -0.04 | 0.063 | 4180  | 4090  | 3510 | 4690  | 4440  | 4680  | 4540  | 4820  | 506   | 1514.9 | 3 | 0.0043 | 2.837 |
| 14-3-3 protein zeta/delta OS=Ovis aries GN=YWHAZ PE=1 SV=1 | 1 1433Z_SHEEP,sp P63101 1433Z_MOUSE,sp P63102 1433Z_RAT,sp P63103 1433Z_BOVIN,sp P63104 1433Z_HUMAN,sp Q5R651 1433Z_POONAB,tr DOPNI1 DOPNI1_HUMAN,tr D2GY30 D2GY30_AILME,tr F1PBL1 F1PBL1_CANFA,tr F2Z558 F2Z558_PIG,tr F | nLLS<br>VAYk | 67% | 33.7 | 51.08906 | Ref | 0.076 | -0.27 | -0.08 | -0.082 | 0.32  | -0.11 | -0.09 | 11600 | 11100 | 9500 | 12200 | 13400 | 15500 | 12000 | 12100 | 506.3 | 1515.9 | 3 | 0.0018 | 1.199 |

|                                                            |                                                                                                                                                                                                                           |                   |     |      |         |     |        |       |       |       |      |       |      |      |      |      |      |      |      |      |      |       |        |   |        |       |
|------------------------------------------------------------|---------------------------------------------------------------------------------------------------------------------------------------------------------------------------------------------------------------------------|-------------------|-----|------|---------|-----|--------|-------|-------|-------|------|-------|------|------|------|------|------|------|------|------|------|-------|--------|---|--------|-------|
| 14-3-3 protein zeta/delta OS=Ovis aries GN=YWHAZ PE=1 SV=1 | 1 1433Z_SHEEP,sp P63101 1433Z_MOUSE,sp P63102 1433Z_RAT,sp P63103 1433Z_BOVIN,sp P63104 1433Z_HUMAN,sp Q5R651 1433Z_POONAB,tr D0PNI1 D0PNI1_HUMAN,tr D2GY30 D2GY30_AILME,tr F1PBL1 F1PBL1_CANFA,tr F2Z558 F2Z558_PIG,tr F | nLLS VAYK NVV GAR | 93% | 47.3 | 51.8956 | Ref | 0.13   | -0.1  | -0.15 | -0.25 | 0.09 | -0.11 | -0   | 832  | 735  | 678  | 738  | 759  | 837  | 759  | 813  | 603.4 | 1807.1 | 3 | 0.0083 | 4.587 |
| 14-3-3 protein zeta/delta OS=Ovis aries GN=YWHAZ PE=1 SV=1 | 1 1433Z_SHEEP,sp P63101 1433Z_MOUSE,sp P63102 1433Z_RAT,sp P63103 1433Z_BOVIN,sp P63104 1433Z_HUMAN,sp Q5R651 1433Z_POONAB,tr D0PNI1 D0PNI1_HUMAN,tr D2GY30 D2GY30_AILME,tr F1PBL1 F1PBL1_CANFA,tr F2Z558 F2Z558_PIG,tr F | nLLS VAYK NVV GAR | 95% | 62.5 | 51.7232 | Ref | -0.084 | -0.05 | -0    | -0.18 | 0.1  | -0.03 | 0.13 | 2080 | 1890 | 2100 | 2440 | 2380 | 2520 | 2400 | 2670 | 603.4 | 1807.1 | 3 | 0.0059 | 3.26  |

|                                                            |                                                                                                                                                                                                                               |                            |     |      |          |     |      |       |       |        |       |       |       |       |       |       |       |       |       |       |       |       |        |   |        |       |
|------------------------------------------------------------|-------------------------------------------------------------------------------------------------------------------------------------------------------------------------------------------------------------------------------|----------------------------|-----|------|----------|-----|------|-------|-------|--------|-------|-------|-------|-------|-------|-------|-------|-------|-------|-------|-------|-------|--------|---|--------|-------|
| 14-3-3 protein zeta/delta OS=Ovis aries GN=YWHAZ PE=1 SV=1 | 1 1433Z_SHEEP,sp P63101 1433Z_MOUSE,sp P63102 1433Z_RAT,sp P63103 1433Z_BOVIN,sp P63104 1433Z_HUMAN,sp Q5R651 1433Z_POONAB,tr D0PNI1 D0PNI1_HUMAN,MAN,tr D2GY30 D2GY30_AILME,tr F1PBL1 F1PBL1_CANFA,tr F2Z558 F2Z558_PIG,tr F | svTE<br>QGA<br>ELSN<br>EER | 95% | 64.1 | 51.42246 | Ref | 0.14 | -0.04 | -0.15 | 0.021  | 0.12  | -0.14 | -0.23 | 22800 | 21900 | 21000 | 21800 | 27000 | 25300 | 22100 | 20600 | 927   | 1851.9 | 2 | 0.0129 | 6.965 |
| 14-3-3 protein zeta/delta OS=Ovis aries GN=YWHAZ PE=1 SV=1 | 1 1433Z_SHEEP,sp P63101 1433Z_MOUSE,sp P63102 1433Z_RAT,sp P63103 1433Z_BOVIN,sp P63104 1433Z_HUMAN,sp Q5R651 1433Z_POONAB,tr D0PNI1 D0PNI1_HUMAN,MAN,tr D2GY30 D2GY30_AILME,tr F1PBL1 F1PBL1_CANFA,tr F2Z558 F2Z558_PIG,tr F | svTE<br>QGA<br>ELSN<br>EER | 95% | 59   | 51.47095 | Ref | 0.42 | -0.17 | -0.27 | -0.018 | -0.14 | 0.24  | -0.77 | 28400 | 29300 | 21100 | 22100 | 29100 | 23400 | 31600 | 15700 | 618.3 | 1851.9 | 3 | 0.0121 | 6.547 |

|                                                            |                                                                                                                                                                                                                           |                   |     |      |          |     |       |       |       |       |       |       |       |      |      |      |      |      |      |      |      |       |        |   |        |       |
|------------------------------------------------------------|---------------------------------------------------------------------------------------------------------------------------------------------------------------------------------------------------------------------------|-------------------|-----|------|----------|-----|-------|-------|-------|-------|-------|-------|-------|------|------|------|------|------|------|------|------|-------|--------|---|--------|-------|
| 14-3-3 protein zeta/delta OS=Ovis aries GN=YWHAZ PE=1 SV=1 | 1 1433Z_SHEEP,sp P63101 1433Z_MOUSE,sp P63102 1433Z_RAT,sp P63103 1433Z_BOVIN,sp P63104 1433Z_HUMAN,sp Q5R651 1433Z_POB,sp D00PNI1 D00PNI1_HUMAN,sp D02GY30 D2GY30_AILME,sp F1PBL1 F1PBL1_CANFAL1 F22558 F22558_PIG,sp F1 | yDD<br>MAA<br>cMk | 87% | 38.4 | 48.35552 | Ref | 0.28  | 0.14  | -0.12 | -0.15 | 0.003 | -0.33 | -0.16 | 7340 | 7690 | 7560 | 7080 | 7630 | 7410 | 6130 | 6870 | 567.9 | 1700.8 | 3 | 0.0124 | 7.313 |
| 14-3-3 protein zeta/delta OS=Ovis aries GN=YWHAZ PE=1 SV=1 | 1 1433Z_SHEEP,sp P63101 1433Z_MOUSE,sp P63102 1433Z_RAT,sp P63103 1433Z_BOVIN,sp P63104 1433Z_HUMAN,sp Q5R651 1433Z_POB,sp D00PNI1 D00PNI1_HUMAN,sp D02GY30 D2GY30_AILME,sp F1PBL1 F1PBL1_CANFAL1 F22558 F22558_PIG,sp F1 | yDD<br>MAA<br>cMk | 68% | 31.4 | 48.79263 | Ref | 0.078 | -0.22 | 0.033 | -0.11 | -0.03 | 0.076 | -0.22 | 3660 | 3110 | 2740 | 3670 | 3670 | 3380 | 3800 | 3080 | 567.9 | 1700.8 | 3 | 0.0062 | 3.646 |

|                                                                         |                                               |                                |     |      |          |     |        |       |       |       |       |       |       |       |       |       |       |       |       |       |       |       |        |   |        |       |
|-------------------------------------------------------------------------|-----------------------------------------------|--------------------------------|-----|------|----------|-----|--------|-------|-------|-------|-------|-------|-------|-------|-------|-------|-------|-------|-------|-------|-------|-------|--------|---|--------|-------|
| Proteasome activator complex subunit 1 OS=Bos taurus GN=PSME1 PE=1 SV=1 | sp Q4U5R3 PSME1_BOVIN, tr Q2KJE7 Q2KJE7_BOVIN | aPLD<br>IPVP<br>DPV<br>k       | 54% | 29.4 | 49.31956 | Ref | -0.41  | -0.55 | 0.057 | -0.23 | 0.12  | -1.1  | -0.22 | 12200 | 7960  | 7830  | 13400 | 12200 | 13500 | 5930  | 11000 | 810.8 | 2429.5 | 3 | 0.0163 | 6.72  |
| Proteasome activator complex subunit 1 OS=Bos taurus GN=PSME1 PE=1 SV=1 | sp Q4U5R3 PSME1_BOVIN, tr Q2KJE7 Q2KJE7_BOVIN | iEDG<br>NNF<br>GVA<br>VQE<br>k | 90% | 46.7 | 54.09481 | Ref | -0.002 | -0.43 | -0.09 | -0.34 | -0.39 | -0.77 | -0.1  | 11600 | 10400 | 8340  | 11900 | 11000 | 9290  | 7450  | 11700 | 710   | 2127.1 | 3 | 0.0175 | 8.223 |
| Proteasome activator complex subunit 1 OS=Bos taurus GN=PSME1 PE=1 SV=1 | sp Q4U5R3 PSME1_BOVIN, tr Q2KJE7 Q2KJE7_BOVIN | iEDG<br>nNF<br>GVA<br>VQE<br>k | 95% | 55.1 | 54.12956 | Ref | 0.098  | -0.64 | -0.27 | -0.24 | -0.06 | -0.69 | -0.5  | 13600 | 12000 | 7810  | 11400 | 12800 | 12700 | 8540  | 9630  | 710.4 | 2128.1 | 3 | 0.0189 | 8.887 |
| Proteasome activator complex subunit 1 OS=Bos taurus GN=PSME1 PE=1 SV=1 | sp Q4U5R3 PSME1_BOVIN, tr Q2KJE7 Q2KJE7_BOVIN | iEDG<br>nNF<br>GVA<br>VQE<br>k | 87% | 44   | 54.15619 | Ref | -0.22  | -0.57 | -0.16 | -0.25 | -0.25 | -0.32 | -0.12 | 14800 | 12300 | 10500 | 15600 | 16200 | 14200 | 14100 | 16100 | 710.4 | 2128.1 | 3 | 0.0163 | 7.675 |
| Proteasome activator complex subunit 1 OS=Bos taurus GN=PSME1 PE=1 SV=1 | sp Q4U5R3 PSME1_BOVIN, tr Q2KJE7 Q2KJE7_BOVIN | ivVL<br>LQR                    | 95% | 50.7 | 44.57185 | Ref | -0.42  | -0.88 | -0.14 | -0.28 | 0.09  | -0.82 | -0.28 | 1820  | 947   | 747   | 1390  | 1390  | 1580  | 878   | 1260  | 382.3 | 1143.8 | 3 | 0.0084 | 7.371 |

|                                                                         |                                               |              |     |      |          |     |       |       |       |       |       |       |       |      |      |      |      |      |      |      |      |       |        |   |        |       |
|-------------------------------------------------------------------------|-----------------------------------------------|--------------|-----|------|----------|-----|-------|-------|-------|-------|-------|-------|-------|------|------|------|------|------|------|------|------|-------|--------|---|--------|-------|
| Proteasome activator complex subunit 1 OS=Bos taurus GN=PSME1 PE=1 SV=1 | sp Q4U5R3 PSME1_BOVIN, tr Q2KJE7 Q2KJE7_BOVIN | kISELDAFLk   | 53% | 28.4 | 48.56433 | Ref | -0.31 | -0.67 | -0.03 | -0.29 | 0.11  | -0.92 | -0.2  | 4710 | 3230 | 2730 | 4800 | 4400 | 5060 | 2600 | 4240 | 692.8 | 2075.3 | 3 | 0.0038 | 1.844 |
| Proteasome activator complex subunit 1 OS=Bos taurus GN=PSME1 PE=1 SV=1 | sp Q4U5R3 PSME1_BOVIN, tr Q2KJE7 Q2KJE7_BOVIN | kISELDAFLk   | 80% | 32.5 | 48.22076 | Ref | -0.29 | -1.1  | 0.006 | -0.41 | 0.1   | -1.2  | 0.028 | 6400 | 3990 | 2490 | 5950 | 4920 | 6120 | 2640 | 6020 | 519.8 | 2075.3 | 4 | #####  | 0.181 |
| Proteasome activator complex subunit 1 OS=Bos taurus GN=PSME1 PE=1 SV=1 | sp Q4U5R3 PSME1_BOVIN, tr Q2KJE7 Q2KJE7_BOVIN | nAYAVLYDIILk | 89% | 42.1 | 50.95078 | Ref | 0.22  | -0.35 | 0.06  | -0.4  | -0.2  | -1    | -0.82 | 787  | 762  | 555  | 829  | 666  | 668  | 392  | 451  | 668.7 | 2003.2 | 3 | 0.0051 | 2.545 |
| Proteasome activator complex subunit 1 OS=Bos taurus GN=PSME1 PE=1 SV=1 | sp Q4U5R3 PSME1_BOVIN, tr Q2KJE7 Q2KJE7_BOVIN | nAYAVLYDIILk | 81% | 38   | 51.37135 | Ref | 0.14  | -0.82 | -0.04 | -0.32 | -0.18 | -0.9  | -0.44 | 404  | 344  | 191  | 369  | 334  | 322  | 205  | 279  | 668.7 | 2003.2 | 3 | 0.0134 | 6.661 |
| Proteasome activator complex subunit 1 OS=Bos taurus GN=PSME1 PE=1 SV=1 | sp Q4U5R3 PSME1_BOVIN, tr Q2KJE7 Q2KJE7_BOVIN | nAYAVLYDIILk | 86% | 40.1 | 51.07244 | Ref | -0.52 | -0.32 | -0.08 | -0.29 | -0.01 | -0.97 | -0.11 | 568  | 330  | 409  | 543  | 517  | 549  | 294  | 530  | 668.7 | 2003.2 | 3 | 0.0066 | 3.278 |

|                                                                         |                                               |                |     |      |          |     |       |                            |       |       |       |       |       |       |       |                            |       |       |       |       |       |       |        |   |        |       |
|-------------------------------------------------------------------------|-----------------------------------------------|----------------|-----|------|----------|-----|-------|----------------------------|-------|-------|-------|-------|-------|-------|-------|----------------------------|-------|-------|-------|-------|-------|-------|--------|---|--------|-------|
| Proteasome activator complex subunit 1 OS=Bos taurus GN=PSME1 PE=1 SV=1 | sp Q4U5R3 PSME1_BOVIN, tr Q2KJE7 Q2KJE7_BOVIN | nAY AVLY DIILK | 85% | 39.7 | 51.2919  | Ref | 0.11  | -0.49                      | -0.13 | -0.13 | -0.13 | -0.34 | -0.32 | 159   | 245   | 174                        | 251   | 277   | 243   | 219   | 220   | 668.7 | 2003.2 | 3 | 0.0102 | 5.104 |
| Proteasome activator complex subunit 1 OS=Bos taurus GN=PSME1 PE=1 SV=1 | sp Q4U5R3 PSME1_BOVIN, tr Q2KJE7 Q2KJE7_BOVIN | qLVH ELDE AEYR | 93% | 48.7 | 52.46326 | Ref | -0.47 | Value Missing (-1.1260751) | 0.057 | -0.43 | 0.41  | -0.71 | -0.15 | 9290  | 6300  | Value Missing (-1.1260751) | 11100 | 8710  | 13500 | 6530  | 9580  | 602.6 | 1804.9 | 3 | 0.0148 | 8.173 |
| Proteasome activator complex subunit 1 OS=Bos taurus GN=PSME1 PE=1 SV=1 | sp Q4U5R3 PSME1_BOVIN, tr Q2KJE7 Q2KJE7_BOVIN | qPH VGD YR     | 79% | 36.4 | 50.59885 | Ref | -0.33 | -0.37                      | -0.24 | -0.3  | -0.04 | -0.62 | -0.13 | 3220  | 2310  | 2430                       | 3000  | 3160  | 3300  | 2310  | 3230  | 425.9 | 1274.7 | 3 | 0.0082 | 6.397 |
| Proteasome activator complex subunit 1 OS=Bos taurus GN=PSME1 PE=1 SV=1 | sp Q4U5R3 PSME1_BOVIN, tr Q2KJE7 Q2KJE7_BOVIN | qPH VGD YR     | 80% | 36.8 | 50.60781 | Ref | -0.38 | -0.51                      | -0.08 | -0.32 | 0.17  | -1.1  | -0.07 | 37200 | 25900 | 25600                      | 38700 | 36100 | 44300 | 19700 | 39000 | 425.9 | 1274.7 | 3 | 0.0084 | 6.609 |
| Proteasome activator complex subunit 1 OS=Bos taurus GN=PSME1 PE=1 SV=1 | sp Q4U5R3 PSME1_BOVIN, tr Q2KJE7 Q2KJE7_BOVIN | vFEL MTA LHTK  | 95% | 53.7 | 52.53699 | Ref | -0.2  | -0.74                      | -0.04 | -0.46 | -0.17 | -0.83 | -0.34 | 4130  | 2380  | 1780                       | 3240  | 2660  | 2830  | 1880  | 2610  | 633.4 | 1897.1 | 3 | 0.0078 | 4.116 |

|                                                                                                     |                                                                                                                                                                                              |              |     |      |          |     |       |       |       |       |      |       |       |       |       |       |       |       |       |       |       |       |        |   |        |       |
|-----------------------------------------------------------------------------------------------------|----------------------------------------------------------------------------------------------------------------------------------------------------------------------------------------------|--------------|-----|------|----------|-----|-------|-------|-------|-------|------|-------|-------|-------|-------|-------|-------|-------|-------|-------|-------|-------|--------|---|--------|-------|
| Proteasome activator complex subunit 1 OS=Bos taurus GN=PSME1 PE=1 SV=1                             | sp Q4U5R3 PSME1_BOVIN, tr Q2KJE7 Q2KJE7_BOVIN                                                                                                                                                | VLPE AQA k   | 79% | 34.1 | 49.00738 | Ref | -0.44 | -0.9  | -0.02 | -0.18 | 0.29 | -1.2  | 0.013 | 57800 | 40800 | 32100 | 66400 | 65600 | 79300 | 30200 | 67800 | 732.5 | 1462.9 | 2 | 0.0068 | 4.655 |
| Proteasome activator complex subunit 1 OS=Bos taurus GN=PSME1 PE=1 SV=1                             | sp Q4U5R3 PSME1_BOVIN, tr Q2KJE7 Q2KJE7_BOVIN                                                                                                                                                | VLPE AQA k   | 82% | 35.2 | 49.00738 | Ref | -0.36 | -0.7  | -0.11 | -0.18 | 0.11 | -0.84 | -0.01 | 9720  | 7420  | 6370  | 10700 | 11300 | 12100 | 6490  | 11500 | 732.5 | 1462.9 | 2 | 0.0071 | 4.819 |
| cDNA, FLJ96568, highly similar to Homo sapiens tropomyosin 3 (TPM3), mRNA OS=Homo sapiens PE=2 SV=1 | tr B2RDE1 B2RDE1_HUMAN, tr E2RB38 E2RB38_CANFA, tr F1RFX8 F1RFX8_PI G, tr F6VQW8 F6VQW8_MAC MU, tr F7IC11 F7IC11_CALJA, tr Q5HYB6 Q5HYB6_HUMAN, tr Q5VU59 Q5VU59_HUMAN, tr Q6QA25 Q6QA25_PIG | aGIT TIEA Vk | 95% | 52.7 | 52.09013 | Ref | -0.24 | -0.23 | -0.47 | -0.36 | 0.14 | -0.88 | -0.1  | 450   | 299   | 326   | 310   | 368   | 455   | 234   | 399   | 674.9 | 1347.8 | 2 | 0.0139 | 10.3  |



|                                                                                                            |                                                                                                                                                                                                      |                                    |            |             |                 |            |              |              |              |              |             |              |              |              |              |              |              |              |              |              |              |              |               |          |               |              |
|------------------------------------------------------------------------------------------------------------|------------------------------------------------------------------------------------------------------------------------------------------------------------------------------------------------------|------------------------------------|------------|-------------|-----------------|------------|--------------|--------------|--------------|--------------|-------------|--------------|--------------|--------------|--------------|--------------|--------------|--------------|--------------|--------------|--------------|--------------|---------------|----------|---------------|--------------|
| <p>cDNA, FLJ96568, highly similar to Homo sapiens tropomyosin 3 (TPM3), mRNA OS=Homo sapiens PE=2 SV=1</p> | <p>tr B2RDE1 B2RDE1_HUMAN, tr E2RB38 E2RB38_CANFA, tr F1RFX8 F1RFX8_PI G, tr F6VQW8 F6VQW8_MAC MU, tr F7IC11 F7IC11_CALJA, tr Q5HYB6 Q5HYB6_HUMAN, tr Q5VU59 Q5VU59_HUMAN, tr Q6QA25 Q6QA25_PI G</p> | <p>cLSA<br/>AEK</p>                | <p>87%</p> | <p>39.6</p> | <p>51.52998</p> | <p>Ref</p> | <p>-0.23</p> | <p>-0.32</p> | <p>-0.36</p> | <p>-0.35</p> | <p>0.03</p> | <p>-0.51</p> | <p>-0.03</p> | <p>9110</p>  | <p>6930</p>  | <p>7090</p>  | <p>7760</p>  | <p>8580</p>  | <p>9750</p>  | <p>6990</p>  | <p>9670</p>  | <p>752.9</p> | <p>1503.8</p> | <p>2</p> | <p>0.0106</p> | <p>7.043</p> |
| <p>cDNA, FLJ96568, highly similar to Homo sapiens tropomyosin 3 (TPM3), mRNA OS=Homo sapiens PE=2 SV=1</p> | <p>tr B2RDE1 B2RDE1_HUMAN, tr E2RB38 E2RB38_CANFA, tr F1RFX8 F1RFX8_PI G, tr F6VQW8 F6VQW8_MAC MU, tr F7IC11 F7IC11_CALJA, tr Q5HYB6 Q5HYB6_HUMAN, tr Q5VU59 Q5VU59_HUMAN, tr Q6QA25 Q6QA25_PI G</p> | <p>eQA<br/>EAEV<br/>ASLN<br/>R</p> | <p>92%</p> | <p>44</p>   | <p>51.99429</p> | <p>Ref</p> | <p>-0.42</p> | <p>-0.37</p> | <p>-0.37</p> | <p>-0.25</p> | <p>0.26</p> | <p>-0.75</p> | <p>0.002</p> | <p>64500</p> | <p>43800</p> | <p>49400</p> | <p>55500</p> | <p>66200</p> | <p>82200</p> | <p>42900</p> | <p>71400</p> | <p>810.9</p> | <p>1619.8</p> | <p>2</p> | <p>0.0124</p> | <p>7.666</p> |

|                                                                                                            |                                                                                                                                                                                                      |                        |            |             |                 |            |              |              |              |               |              |              |              |              |              |              |              |              |              |             |              |              |               |          |               |              |
|------------------------------------------------------------------------------------------------------------|------------------------------------------------------------------------------------------------------------------------------------------------------------------------------------------------------|------------------------|------------|-------------|-----------------|------------|--------------|--------------|--------------|---------------|--------------|--------------|--------------|--------------|--------------|--------------|--------------|--------------|--------------|-------------|--------------|--------------|---------------|----------|---------------|--------------|
| <p>cDNA, FLJ96568, highly similar to Homo sapiens tropomyosin 3 (TPM3), mRNA OS=Homo sapiens PE=2 SV=1</p> | <p>tr B2RDE1 B2RDE1_HUMAN, tr E2RB38 E2RB38_CANFA, tr F1RFX8 F1RFX8_PI G, tr F6VQW8 F6VQW8_MAC MU, tr F7IC11 F7IC11_CALJA, tr Q5HYB6 Q5HYB6_HUMAN, tr Q5VU59 Q5VU59_HUMAN, tr Q6QA25 Q6QA25_PI G</p> | <p>eQA EAEV ASLn R</p> | <p>95%</p> | <p>57.6</p> | <p>51.54558</p> | <p>Ref</p> | <p>-0.32</p> | <p>-0.26</p> | <p>-0.42</p> | <p>-0.27</p>  | <p>0.15</p>  | <p>-0.73</p> | <p>0.027</p> | <p>13600</p> | <p>10100</p> | <p>11400</p> | <p>11500</p> | <p>14000</p> | <p>16400</p> | <p>9260</p> | <p>15600</p> | <p>811.4</p> | <p>1620.8</p> | <p>2</p> | <p>0.0124</p> | <p>7.667</p> |
| <p>cDNA, FLJ96568, highly similar to Homo sapiens tropomyosin 3 (TPM3), mRNA OS=Homo sapiens PE=2 SV=1</p> | <p>tr B2RDE1 B2RDE1_HUMAN, tr E2RB38 E2RB38_CANFA, tr F1RFX8 F1RFX8_PI G, tr F6VQW8 F6VQW8_MAC MU, tr F7IC11 F7IC11_CALJA, tr Q5HYB6 Q5HYB6_HUMAN, tr Q5VU59 Q5VU59_HUMAN, tr Q6QA25 Q6QA25_PI G</p> | <p>eQA EAEV ASLn R</p> | <p>95%</p> | <p>51.2</p> | <p>51.56416</p> | <p>Ref</p> | <p>-0.34</p> | <p>-0.43</p> | <p>-0.3</p>  | <p>-0.086</p> | <p>0.083</p> | <p>-0.73</p> | <p>0.019</p> | <p>10200</p> | <p>7540</p>  | <p>7640</p>  | <p>9410</p>  | <p>12000</p> | <p>11800</p> | <p>7000</p> | <p>11700</p> | <p>811.4</p> | <p>1620.8</p> | <p>2</p> | <p>0.0117</p> | <p>7.21</p>  |

|                                                                                                                                    |                                                                                                                                                                                                      |                             |             |            |             |                 |            |              |              |              |              |             |              |              |             |             |             |             |             |             |             |             |            |             |          |               |              |
|------------------------------------------------------------------------------------------------------------------------------------|------------------------------------------------------------------------------------------------------------------------------------------------------------------------------------------------------|-----------------------------|-------------|------------|-------------|-----------------|------------|--------------|--------------|--------------|--------------|-------------|--------------|--------------|-------------|-------------|-------------|-------------|-------------|-------------|-------------|-------------|------------|-------------|----------|---------------|--------------|
| <p>cDNA, FLJ96568,<br/>highly similar to<br/>Homo sapiens<br/>tropomyosin 3<br/>(TPM3), mRNA<br/>OS=Homo sapiens<br/>PE=2 SV=1</p> | <p>tr B2RDE1 B2RDE1_HUMAN, tr E2RB38 E2RB38_CANFA, tr F1RFX8 F1RFX8_PI G, tr F6VQW8 F6VQW8_MAC MU, tr F7IC11 F7IC11_CALJA, tr Q5HYB6 Q5HYB6_HUMAN, tr Q5VU59 Q5VU59_HUMAN, tr Q6QA25 Q6QA25_PI G</p> | <p>iQVL<br/>QQQ<br/>ADD</p> | <p>AEER</p> | <p>95%</p> | <p>70.6</p> | <p>53.09409</p> | <p>Ref</p> | <p>-0.31</p> | <p>-0.28</p> | <p>-0.39</p> | <p>-0.27</p> | <p>0.1</p>  | <p>-0.63</p> | <p>-0.05</p> | <p>4220</p> | <p>3040</p> | <p>3370</p> | <p>3500</p> | <p>4190</p> | <p>4740</p> | <p>2980</p> | <p>4410</p> | <p>974</p> | <p>1946</p> | <p>2</p> | <p>0.0145</p> | <p>7.451</p> |
| <p>cDNA, FLJ96568,<br/>highly similar to<br/>Homo sapiens<br/>tropomyosin 3<br/>(TPM3), mRNA<br/>OS=Homo sapiens<br/>PE=2 SV=1</p> | <p>tr B2RDE1 B2RDE1_HUMAN, tr E2RB38 E2RB38_CANFA, tr F1RFX8 F1RFX8_PI G, tr F6VQW8 F6VQW8_MAC MU, tr F7IC11 F7IC11_CALJA, tr Q5HYB6 Q5HYB6_HUMAN, tr Q5VU59 Q5VU59_HUMAN, tr Q6QA25 Q6QA25_PI G</p> | <p>iQVL<br/>QQQ<br/>ADD</p> | <p>AEER</p> | <p>95%</p> | <p>66.6</p> | <p>53.20537</p> | <p>Ref</p> | <p>-0.29</p> | <p>-0.28</p> | <p>-0.44</p> | <p>-0.45</p> | <p>0.16</p> | <p>-0.95</p> | <p>0.03</p>  | <p>6050</p> | <p>3870</p> | <p>4230</p> | <p>4250</p> | <p>4660</p> | <p>6210</p> | <p>3000</p> | <p>5870</p> | <p>974</p> | <p>1946</p> | <p>2</p> | <p>0.0114</p> | <p>5.879</p> |

|                                                                                                            |                                                                                                                                                                                                      |                            |            |             |                 |            |              |              |              |              |              |              |              |             |             |             |             |             |             |             |             |              |               |          |               |              |
|------------------------------------------------------------------------------------------------------------|------------------------------------------------------------------------------------------------------------------------------------------------------------------------------------------------------|----------------------------|------------|-------------|-----------------|------------|--------------|--------------|--------------|--------------|--------------|--------------|--------------|-------------|-------------|-------------|-------------|-------------|-------------|-------------|-------------|--------------|---------------|----------|---------------|--------------|
| <p>cDNA, FLJ96568, highly similar to Homo sapiens tropomyosin 3 (TPM3), mRNA OS=Homo sapiens PE=2 SV=1</p> | <p>tr B2RDE1 B2RDE1_HUMAN, tr E2RB38 E2RB38_CANFA, tr F1RFX8 F1RFX8_PI G, tr F6VQW8 F6VQW8_MAC MU, tr F7IC11 F7IC11_CALJA, tr Q5HYB6 Q5HYB6_HUMAN, tr Q5VU59 Q5VU59_HUMAN, tr Q6QA25 Q6QA25_PI G</p> | <p>KIQV LQQ QAD DAE ER</p> | <p>95%</p> | <p>69.7</p> | <p>54.47338</p> | <p>Ref</p> | <p>-0.48</p> | <p>-0.35</p> | <p>-0.4</p>  | <p>-0.28</p> | <p>0.089</p> | <p>-0.74</p> | <p>0.29</p>  | <p>6110</p> | <p>4120</p> | <p>4880</p> | <p>5290</p> | <p>6340</p> | <p>7160</p> | <p>4200</p> | <p>8520</p> | <p>793.8</p> | <p>2378.3</p> | <p>3</p> | <p>0.0149</p> | <p>6.257</p> |
| <p>cDNA, FLJ96568, highly similar to Homo sapiens tropomyosin 3 (TPM3), mRNA OS=Homo sapiens PE=2 SV=1</p> | <p>tr B2RDE1 B2RDE1_HUMAN, tr E2RB38 E2RB38_CANFA, tr F1RFX8 F1RFX8_PI G, tr F6VQW8 F6VQW8_MAC MU, tr F7IC11 F7IC11_CALJA, tr Q5HYB6 Q5HYB6_HUMAN, tr Q5VU59 Q5VU59_HUMAN, tr Q6QA25 Q6QA25_PI G</p> | <p>KIQV LQQ QAD DAE ER</p> | <p>89%</p> | <p>43.5</p> | <p>54.53375</p> | <p>Ref</p> | <p>-0.36</p> | <p>-0.15</p> | <p>-0.16</p> | <p>-0.22</p> | <p>-0.13</p> | <p>-0.61</p> | <p>-0.07</p> | <p>5710</p> | <p>4200</p> | <p>5250</p> | <p>5870</p> | <p>6210</p> | <p>5770</p> | <p>4320</p> | <p>6220</p> | <p>595.6</p> | <p>2378.3</p> | <p>4</p> | <p>0.0179</p> | <p>7.537</p> |

|                                                                                                                       |                                                                                                                                                                                                             |                                                                                                                                                                                                                 |                   |     |          |          |       |       |       |       |       |       |       |       |      |       |      |       |       |      |       |       |        |      |        |        |
|-----------------------------------------------------------------------------------------------------------------------|-------------------------------------------------------------------------------------------------------------------------------------------------------------------------------------------------------------|-----------------------------------------------------------------------------------------------------------------------------------------------------------------------------------------------------------------|-------------------|-----|----------|----------|-------|-------|-------|-------|-------|-------|-------|-------|------|-------|------|-------|-------|------|-------|-------|--------|------|--------|--------|
| cDNA, FLJ96568,<br>highly similar to<br>Homo sapiens<br>tropomyosin 3<br>(TPM3), mRNA<br>OS=Homo sapiens<br>PE=2 SV=1 | tr B2RDE1 B2RDE1_HUMAN,<br>tr E2RB38 E2RB38_CANFA,tr F1RFX8 F1RFX8_PI<br>G,tr F6VQW8 F6VQW8_MAC<br>MU,tr F7IC11 F7IC11_CALJA,<br>tr Q5HYB6 Q5HYB6_HUMAN,<br>tr Q5VU59 Q5VU59_HUMAN,tr Q6QA25 Q6QA25_PI<br>G | klQV<br>LQQ<br>QAD<br>DAE<br>ER                                                                                                                                                                                 | 95%               | 75  | 54.45844 | Ref      | -0.48 | -0.15 | -0.54 | -0.36 | 0.11  | -0.6  | 0.023 | 13100 | 7850 | 10700 | 9180 | 11400 | 13800 | 8830 | 13500 | 793.8 | 2378.3 | 3    | 0.0161 | 6.787  |
|                                                                                                                       | cDNA, FLJ96568,<br>highly similar to<br>Homo sapiens<br>tropomyosin 3<br>(TPM3), mRNA<br>OS=Homo sapiens<br>PE=2 SV=1                                                                                       | tr B2RDE1 B2RDE1_HUMAN,<br>tr E2RB38 E2RB38_CANFA,tr F1RFX8 F1RFX8_PI<br>G,tr F6VQW8 F6VQW8_MAC<br>MU,tr F7IC11 F7IC11_CALJA,<br>tr Q5HYB6 Q5HYB6_HUMAN,<br>tr Q5VU59 Q5VU59_HUMAN,<br>tr Q6QA25 Q6QA25_PI<br>G | mEL<br>QEIQ<br>Lk | 52% | 32.1     | 52.65002 | Ref   | -0.43 | -0.08 | -0.56 | -0.24 | 0.036 | -0.54 | -0.1  | 6570 | 4140  | 5720 | 4590  | 6360  | 6700 | 4690  | 6330  | 870.5  | 1739 | 2      | 0.0215 |

|                                                                                                            |                                                                                                                                                                                                      |                            |            |             |                 |            |              |              |              |              |             |              |              |              |              |              |              |              |              |              |              |              |             |          |               |              |
|------------------------------------------------------------------------------------------------------------|------------------------------------------------------------------------------------------------------------------------------------------------------------------------------------------------------|----------------------------|------------|-------------|-----------------|------------|--------------|--------------|--------------|--------------|-------------|--------------|--------------|--------------|--------------|--------------|--------------|--------------|--------------|--------------|--------------|--------------|-------------|----------|---------------|--------------|
| <p>cDNA, FLJ96568, highly similar to Homo sapiens tropomyosin 3 (TPM3), mRNA OS=Homo sapiens PE=2 SV=1</p> | <p>tr B2RDE1 B2RDE1_HUMAN, tr E2RB38 E2RB38_CANFA, tr F1RFX8 F1RFX8_PI G, tr F6VQW8 F6VQW8_MAC MU, tr F7IC11 F7IC11_CALJA, tr Q5HYB6 Q5HYB6_HUMAN, tr Q5VU59 Q5VU59_HUMAN, tr Q6QA25 Q6QA25_PI G</p> | <p>mEL<br/>QEIQ<br/>Lk</p> | <p>83%</p> | <p>39</p>   | <p>52.67197</p> | <p>Ref</p> | <p>-0.42</p> | <p>-0.28</p> | <p>-0.44</p> | <p>-0.33</p> | <p>0.17</p> | <p>-0.65</p> | <p>-0.09</p> | <p>9520</p>  | <p>5690</p>  | <p>6810</p>  | <p>6870</p>  | <p>8170</p>  | <p>10100</p> | <p>5970</p>  | <p>8710</p>  | <p>870.5</p> | <p>1739</p> | <p>2</p> | <p>0.0211</p> | <p>12.12</p> |
| <p>cDNA, FLJ96568, highly similar to Homo sapiens tropomyosin 3 (TPM3), mRNA OS=Homo sapiens PE=2 SV=1</p> | <p>tr B2RDE1 B2RDE1_HUMAN, tr E2RB38 E2RB38_CANFA, tr F1RFX8 F1RFX8_PI G, tr F6VQW8 F6VQW8_MAC MU, tr F7IC11 F7IC11_CALJA, tr Q5HYB6 Q5HYB6_HUMAN, tr Q5VU59 Q5VU59_HUMAN, tr Q6QA25 Q6QA25_PI G</p> | <p>mEL<br/>QEIQ<br/>Lk</p> | <p>83%</p> | <p>39.9</p> | <p>52.44351</p> | <p>Ref</p> | <p>-0.48</p> | <p>-0.21</p> | <p>-0.56</p> | <p>-0.38</p> | <p>0.18</p> | <p>-0.78</p> | <p>0.11</p>  | <p>28800</p> | <p>17000</p> | <p>22200</p> | <p>19600</p> | <p>24500</p> | <p>31500</p> | <p>16900</p> | <p>31100</p> | <p>580.7</p> | <p>1739</p> | <p>3</p> | <p>0.0158</p> | <p>9.07</p>  |

|                                                                                                                                    |                                                                                                                                                                                                      |                            |            |             |                 |            |              |            |              |               |              |              |              |             |             |             |             |             |             |             |             |              |             |          |               |              |
|------------------------------------------------------------------------------------------------------------------------------------|------------------------------------------------------------------------------------------------------------------------------------------------------------------------------------------------------|----------------------------|------------|-------------|-----------------|------------|--------------|------------|--------------|---------------|--------------|--------------|--------------|-------------|-------------|-------------|-------------|-------------|-------------|-------------|-------------|--------------|-------------|----------|---------------|--------------|
| <p>cDNA, FLJ96568,<br/>highly similar to<br/>Homo sapiens<br/>tropomyosin 3<br/>(TPM3), mRNA<br/>OS=Homo sapiens<br/>PE=2 SV=1</p> | <p>tr B2RDE1 B2RDE1_HUMAN, tr E2RB38 E2RB38_CANFA, tr F1RFX8 F1RFX8_PI G, tr F6VQW8 F6VQW8_MAC MU, tr F7IC11 F7IC11_CALJA, tr Q5HYB6 Q5HYB6_HUMAN, tr Q5VU59 Q5VU59_HUMAN, tr Q6QA25 Q6QA25_PI G</p> | <p>mEL<br/>QEIQ<br/>Lk</p> | <p>95%</p> | <p>50.6</p> | <p>52.61841</p> | <p>Ref</p> | <p>-0.95</p> | <p>0.6</p> | <p>-1.1</p>  | <p>0.072</p>  | <p>-0.6</p>  | <p>0.009</p> | <p>-0.66</p> | <p>6330</p> | <p>2780</p> | <p>8800</p> | <p>3130</p> | <p>7570</p> | <p>4160</p> | <p>6610</p> | <p>4120</p> | <p>870.5</p> | <p>1739</p> | <p>2</p> | <p>0.0135</p> | <p>7.768</p> |
| <p>cDNA, FLJ96568,<br/>highly similar to<br/>Homo sapiens<br/>tropomyosin 3<br/>(TPM3), mRNA<br/>OS=Homo sapiens<br/>PE=2 SV=1</p> | <p>tr B2RDE1 B2RDE1_HUMAN, tr E2RB38 E2RB38_CANFA, tr F1RFX8 F1RFX8_PI G, tr F6VQW8 F6VQW8_MAC MU, tr F7IC11 F7IC11_CALJA, tr Q5HYB6 Q5HYB6_HUMAN, tr Q5VU59 Q5VU59_HUMAN, tr Q6QA25 Q6QA25_PI G</p> | <p>mEL<br/>QEIQ<br/>Lk</p> | <p>95%</p> | <p>47.7</p> | <p>52.67817</p> | <p>Ref</p> | <p>-0.71</p> | <p>0.1</p> | <p>-0.75</p> | <p>-0.046</p> | <p>-0.15</p> | <p>-0.21</p> | <p>-0.25</p> | <p>7080</p> | <p>3630</p> | <p>6930</p> | <p>4320</p> | <p>7740</p> | <p>6270</p> | <p>6300</p> | <p>6090</p> | <p>870.5</p> | <p>1739</p> | <p>2</p> | <p>0.0129</p> | <p>7.423</p> |

|                                                                                                                                    |                                                                                                                                                                                                      |                            |            |             |                 |            |              |             |              |               |              |              |              |              |              |              |              |              |              |              |              |              |             |          |               |              |
|------------------------------------------------------------------------------------------------------------------------------------|------------------------------------------------------------------------------------------------------------------------------------------------------------------------------------------------------|----------------------------|------------|-------------|-----------------|------------|--------------|-------------|--------------|---------------|--------------|--------------|--------------|--------------|--------------|--------------|--------------|--------------|--------------|--------------|--------------|--------------|-------------|----------|---------------|--------------|
| <p>cDNA, FLJ96568,<br/>highly similar to<br/>Homo sapiens<br/>tropomyosin 3<br/>(TPM3), mRNA<br/>OS=Homo sapiens<br/>PE=2 SV=1</p> | <p>tr B2RDE1 B2RDE1_HUMAN, tr E2RB38 E2RB38_CANFA, tr F1RFX8 F1RFX8_PI G, tr F6VQW8 F6VQW8_MAC MU, tr F7IC11 F7IC11_CALJA, tr Q5HYB6 Q5HYB6_HUMAN, tr Q5VU59 Q5VU59_HUMAN, tr Q6QA25 Q6QA25_PI G</p> | <p>mEL<br/>QEIQ<br/>Lk</p> | <p>54%</p> | <p>32.5</p> | <p>52.46843</p> | <p>Ref</p> | <p>-0.83</p> | <p>0.59</p> | <p>-1.2</p>  | <p>0.034</p>  | <p>-0.48</p> | <p>-0.07</p> | <p>-0.4</p>  | <p>27500</p> | <p>14500</p> | <p>42300</p> | <p>13900</p> | <p>35500</p> | <p>21700</p> | <p>30200</p> | <p>23800</p> | <p>580.7</p> | <p>1739</p> | <p>3</p> | <p>0.0076</p> | <p>4.346</p> |
| <p>cDNA, FLJ96568,<br/>highly similar to<br/>Homo sapiens<br/>tropomyosin 3<br/>(TPM3), mRNA<br/>OS=Homo sapiens<br/>PE=2 SV=1</p> | <p>tr B2RDE1 B2RDE1_HUMAN, tr E2RB38 E2RB38_CANFA, tr F1RFX8 F1RFX8_PI G, tr F6VQW8 F6VQW8_MAC MU, tr F7IC11 F7IC11_CALJA, tr Q5HYB6 Q5HYB6_HUMAN, tr Q5VU59 Q5VU59_HUMAN, tr Q6QA25 Q6QA25_PI G</p> | <p>mEL<br/>QEIQ<br/>Lk</p> | <p>65%</p> | <p>34</p>   | <p>52.38749</p> | <p>Ref</p> | <p>-0.92</p> | <p>0.34</p> | <p>-0.64</p> | <p>-0.029</p> | <p>-0.34</p> | <p>-0.02</p> | <p>-0.14</p> | <p>5630</p>  | <p>3270</p>  | <p>8480</p>  | <p>4810</p>  | <p>8120</p>  | <p>5700</p>  | <p>7440</p>  | <p>6790</p>  | <p>870.5</p> | <p>1739</p> | <p>2</p> | <p>0.0028</p> | <p>1.596</p> |



|                                                                                                            |                                                                                                                                                                                                                           |                            |            |             |                 |            |              |              |              |              |              |              |              |              |              |              |              |              |              |              |              |              |               |          |               |              |
|------------------------------------------------------------------------------------------------------------|---------------------------------------------------------------------------------------------------------------------------------------------------------------------------------------------------------------------------|----------------------------|------------|-------------|-----------------|------------|--------------|--------------|--------------|--------------|--------------|--------------|--------------|--------------|--------------|--------------|--------------|--------------|--------------|--------------|--------------|--------------|---------------|----------|---------------|--------------|
| <p>cDNA, FLJ96568, highly similar to Homo sapiens tropomyosin 3 (TPM3), mRNA OS=Homo sapiens PE=2 SV=1</p> | <p>tr B2RDE1 B2RDE1_HUMAN, tr E2RB38 E2RB38_CANFA, tr F1RFX8 F1RFX8_PI G, tr F6VQW8 F6VQW8_MAC MU, tr F71C11 F71C11_CALJA, tr Q5HYB6 Q5HYB6_HUMAN, tr Q5VU59 Q5VU59_HUMAN, tr Q6QA25 Q6QA25_PI G</p>                      | <p>tIDD LEDK</p>           | <p>79%</p> | <p>37.4</p> | <p>52.49502</p> | <p>Ref</p> | <p>-0.32</p> | <p>-0.18</p> | <p>-0.62</p> | <p>-0.26</p> | <p>0.16</p>  | <p>-0.87</p> | <p>-0.08</p> | <p>20600</p> | <p>12800</p> | <p>15300</p> | <p>12700</p> | <p>18000</p> | <p>21000</p> | <p>10800</p> | <p>18400</p> | <p>778.9</p> | <p>1555.8</p> | <p>2</p> | <p>0.0102</p> | <p>6.575</p> |
| <p>Histone H2B type 1-K OS=Homo sapiens GN=HIST1H2BK PE=1 SV=3</p>                                         | <p>4 H2B1K_HUMAN, sp P10853 H2B1F_MOUSE, sp P10854 H2B1M_MOUSE, sp P57053 H2BFS_HUMAN, sp P58876 H2B1D_HUMAN, sp P62807 H2B1C_HUMAN, sp P62808 H2B1_BOVIN, sp Q00715 H2B1_RAT, sp Q2M2T1 H2B1K_BOVIN, sp Q5QNW6 H2B2F</p> | <p>aMG IMN SFVN DIFE R</p> | <p>65%</p> | <p>34.7</p> | <p>52.69569</p> | <p>Ref</p> | <p>0.067</p> | <p>-0.58</p> | <p>-0.86</p> | <p>-0.62</p> | <p>-0.32</p> | <p>-0.21</p> | <p>-0.23</p> | <p>237</p>   | <p>167</p>   | <p>116</p>   | <p>107</p>   | <p>139</p>   | <p>150</p>   | <p>168</p>   | <p>165</p>   | <p>683.3</p> | <p>2047</p>   | <p>3</p> | <p>0.0124</p> | <p>6.037</p> |

|                                                             |                                                                                                                                                                                                           |            |     |      |          |     |       |       |        |       |       |       |       |       |       |       |       |        |       |       |       |       |        |   |        |       |
|-------------------------------------------------------------|-----------------------------------------------------------------------------------------------------------------------------------------------------------------------------------------------------------|------------|-----|------|----------|-----|-------|-------|--------|-------|-------|-------|-------|-------|-------|-------|-------|--------|-------|-------|-------|-------|--------|---|--------|-------|
| Histone H2B type 1-K OS=Homo sapiens GN=HIST1H2BK PE=1 SV=3 | 4 H2B1K_HUMAN,sp P10853 H2B1F_MOUSE,s P10854 H2B1M_MOUSE,s P57053 H2BFS_HUMAN,sp P58876 H2B1D_HUMAN,sp P62807 H2B1C_HUMAN,sp P62808 H2B1_BOVIN,sp Q00715 H2B1_RAT,sp Q2M2T1 H2B1K_BOVIN,sp Q5QNW6 H2B2F_k | eSYS VVYVY | 95% | 49.6 | 53.15968 | Ref | -0.49 | -0.05 | -1.4   | -0.05 | -0.15 | -0.19 | -0.14 | 47500 | 29100 | 42900 | 18700 | 53000  | 43200 | 43900 | 45200 | 873.5 | 1744.9 | 2 | 0.0167 | 9.569 |
| Histone H2B type 1-K OS=Homo sapiens GN=HIST1H2BK PE=1 SV=3 | 4 H2B1K_HUMAN,sp P10853 H2B1F_MOUSE,s P10854 H2B1M_MOUSE,s P57053 H2BFS_HUMAN,sp P58876 H2B1D_HUMAN,sp P62807 H2B1C_HUMAN,sp P62808 H2B1_BOVIN,sp Q00715 H2B1_RAT,sp Q2M2T1 H2B1K_BOVIN,sp Q5QNW6 H2B2F_k | eSYS VVYVY | 61% | 34.4 | 53.10185 | Ref | -0.43 | 0.01  | 0.0667 | -0.33 | -0.14 | 0.13  | -0.28 | 1E+05 | 72700 | 1E+05 | 667   | 105000 | 1E+05 | 1E+05 | 98000 | 582.7 | 1744.9 | 3 | 0.0156 | 8.937 |

|                                                             |                                                                                                                                                                                                                           |                                                                                                                                                                                                                           |           |      |          |          |       |      |       |        |       |       |       |       |       |       |       |       |       |       |       |       |        |        |        |        |
|-------------------------------------------------------------|---------------------------------------------------------------------------------------------------------------------------------------------------------------------------------------------------------------------------|---------------------------------------------------------------------------------------------------------------------------------------------------------------------------------------------------------------------------|-----------|------|----------|----------|-------|------|-------|--------|-------|-------|-------|-------|-------|-------|-------|-------|-------|-------|-------|-------|--------|--------|--------|--------|
| Histone H2B type 1-K OS=Homo sapiens GN=HIST1H2BK PE=1 SV=3 | 4 H2B1K_HUMAN,s p P10853  H2B1F_MOUSE,s p P10854  H2B1M_MOUSE,s p P57053  H2BFS_HUMAN,sp  P58876  H2B1D_HUMAN,sp  P62807  H2B1C_HUMAN,sp  P62808  H2B1_BOVIN,sp Q00715 H2B1_RAT,s p Q2M2T1 H2B1K_BOVIN,sp  Q5QNW6 H2B2F_k | eSYS VYVY                                                                                                                                                                                                                 | 95%       | 49.2 | 53.10296 | Ref      | -0.63 | -0.1 | -1.5  | -0.018 | -0.02 | -0.26 | 0.086 | 20500 | 12400 | 19500 | 8150  | 25500 | 22300 | 19600 | 24800 | 873.5 | 1744.9 | 2      | 0.0157 | 9.008  |
|                                                             | Histone H2B type 1-K OS=Homo sapiens GN=HIST1H2BK PE=1 SV=3                                                                                                                                                               | 4 H2B1K_HUMAN,s p P10853  H2B1F_MOUSE,s p P10854  H2B1M_MOUSE,s p P57053  H2BFS_HUMAN,sp  P58876  H2B1D_HUMAN,sp  P62807  H2B1C_HUMAN,sp  P62808  H2B1_BOVIN,sp Q00715 H2B1_RAT,s p Q2M2T1 H2B1K_BOVIN,sp  Q5QNW6 H2B2F_k | hAVS EGTK | 95%  | 56.1     | 52.16359 | Ref   | -0.5 | -0.07 | -1.3   | -0.23 | -0.04 | -0.22 | -0.09 | 18500 | 11000 | 16100 | 7760  | 17900 | 17700 | 16300 | 17800 | 479.6  | 1435.8 | 3      | 0.0232 |

|                                                             |                                                                                                                                                                                                                         |              |     |      |          |     |       |       |      |       |       |       |       |       |       |       |       |        |       |       |        |       |        |   |        |       |
|-------------------------------------------------------------|-------------------------------------------------------------------------------------------------------------------------------------------------------------------------------------------------------------------------|--------------|-----|------|----------|-----|-------|-------|------|-------|-------|-------|-------|-------|-------|-------|-------|--------|-------|-------|--------|-------|--------|---|--------|-------|
| Histone H2B type 1-K OS=Homo sapiens GN=HIST1H2BK PE=1 SV=3 | 4 H2B1K_HUMAN,s p P10853  H2B1F_MOUSE,s p P10854  H2B1M_MOUSE,s p P57053  H2BFS_HUMAN,sp  P58876  H2B1D_HUMAN,sp  P62807  H2B1C_HUMAN,sp  P62808  H2B1_BOVIN,sp Q00715 H2B1_RAT,s p Q2M2T1 H2B1K_BOVIN,sp  Q5QNW6 H2B2F | hAVS         | 90% | 44   | 52.07295 | Ref | -0.33 | -0.03 | -1.4 | -0.23 | -0.04 | -0.16 | -0.19 | 1E+05 | 82800 | 1E+05 | 47700 | 120000 | 1E+05 | 1E+05 | 111000 | 479.6 | 1435.8 | 3 | 0.0268 | 18.68 |
| Histone H2B type 1-K OS=Homo sapiens GN=HIST1H2BK PE=1 SV=3 | 4 H2B1K_HUMAN,s p P10853  H2B1F_MOUSE,s p P10854  H2B1M_MOUSE,s p P57053  H2BFS_HUMAN,sp  P58876  H2B1D_HUMAN,sp  P62807  H2B1C_HUMAN,sp  P62808  H2B1_BOVIN,sp Q00715 H2B1_RAT,s p Q2M2T1 H2B1K_BOVIN,sp  Q5QNW6 H2B2F | kESY SVYV Yk | 85% | 40.8 | 53.52993 | Ref | -0.6  | 0.016 | -1.8 | 0.083 | -0.25 | -0.26 | 0.012 | 3000  | 1690  | 2820  | 907   | 3650   | 2530  | 2630  | 3150   | 1090  | 2177.2 | 2 | 0.0273 | 12.54 |

|                                                             |                                                                                                                                                                                                                           |                   |     |      |          |     |       |       |      |       |       |       |       |       |        |       |        |        |       |       |        |       |      |   |        |       |
|-------------------------------------------------------------|---------------------------------------------------------------------------------------------------------------------------------------------------------------------------------------------------------------------------|-------------------|-----|------|----------|-----|-------|-------|------|-------|-------|-------|-------|-------|--------|-------|--------|--------|-------|-------|--------|-------|------|---|--------|-------|
| Histone H2B type 1-K OS=Homo sapiens GN=HIST1H2BK PE=1 SV=3 | 4 H2B1K_HUMAN,s p P10853  H2B1F_MOUSE,s p P10854  H2B1M_MOUSE,s p P57053  H2BFS_HUMAN,sp  P58876  H2B1D_HUMAN,sp  P62807  H2B1C_HUMAN,sp  P62808  H2B1_BOVIN,sp Q00715 H2B1_RAT,s p Q2M2T1 H2B1K_BOVIN,sp  Q5QNW6 H2B2F_k | ILLP<br>GELA<br>k | 88% | 35.2 | 46.58355 | Ref | -0.5  | 0.097 | -2   | -0.1  | -0.08 | -0.21 | -0.06 | 96300 | 60300  | 99100 | 26800  | 107000 | 95000 | 90300 | 99400  | 781.5 | 1561 | 2 | 0.0166 | 10.61 |
| Histone H2B type 1-K OS=Homo sapiens GN=HIST1H2BK PE=1 SV=3 | 4 H2B1K_HUMAN,s p P10853  H2B1F_MOUSE,s p P10854  H2B1M_MOUSE,s p P57053  H2BFS_HUMAN,sp  P58876  H2B1D_HUMAN,sp  P62807  H2B1C_HUMAN,sp  P62808  H2B1_BOVIN,sp Q00715 H2B1_RAT,s p Q2M2T1 H2B1K_BOVIN,sp  Q5QNW6 H2B2F_k | ILLP<br>GELA<br>k | 80% | 32.9 | 46.44321 | Ref | -0.66 | 0.028 | -1.8 | -0.11 | -0.05 | -0.17 | 0.069 | 4E+05 | 219000 | 4E+05 | 123000 | 432000 | 4E+05 | 4E+05 | 442000 | 521.3 | 1561 | 3 | 0.013  | 8.317 |

|                                                             |                                                                                                                                                                                                                          |                                                                                                                                                                                                                          |            |      |          |          |       |       |       |       |       |       |       |       |       |       |       |       |       |       |       |       |       |      |        |        |
|-------------------------------------------------------------|--------------------------------------------------------------------------------------------------------------------------------------------------------------------------------------------------------------------------|--------------------------------------------------------------------------------------------------------------------------------------------------------------------------------------------------------------------------|------------|------|----------|----------|-------|-------|-------|-------|-------|-------|-------|-------|-------|-------|-------|-------|-------|-------|-------|-------|-------|------|--------|--------|
| Histone H2B type 1-K OS=Homo sapiens GN=HIST1H2BK PE=1 SV=3 | 4 H2B1K_HUMAN,s p P10853  H2B1F_MOUSE,s p P10854  H2B1M_MOUSE,s p P57053  H2BFS_HUMAN,sp  P58876  H2B1D_HUMAN,sp  P62807  H2B1C_HUMAN,sp  P62808  H2B1_BOVIN,sp Q00715 H2B1_RAT,s p Q2M2T1 H2B1K_BOVIN,sp Q5QNW6 H2B2F_k | ILLP GELAK                                                                                                                                                                                                               | 70%        | 28.3 | 45.66284 | Ref      | -0.45 | -0.16 | -1.3  | -0.16 | -0.13 | -0.18 | -0.14 | 25000 | 14300 | 18900 | 9370  | 23400 | 20900 | 21100 | 21500 | 781.5 | 1561  | 2    | 0.0069 | 4.44   |
|                                                             | Histone H2B type 1-K OS=Homo sapiens GN=HIST1H2BK PE=1 SV=3                                                                                                                                                              | 4 H2B1K_HUMAN,s p P10853  H2B1F_MOUSE,s p P10854  H2B1M_MOUSE,s p P57053  H2BFS_HUMAN,sp  P58876  H2B1D_HUMAN,sp  P62807  H2B1C_HUMAN,sp  P62808  H2B1_BOVIN,sp Q00715 H2B1_RAT,s p Q2M2T1 H2B1K_BOVIN,sp Q5QNW6 H2B2F_k | ILLP GELAK | 82%  | 33.2     | 47.08412 | Ref   | -0.53 | -0.01 | -1.6  | -0.12 | -0.14 | -0.17 | -0.08 | 15400 | 8950  | 13900 | 5360  | 15900 | 13700 | 14100 | 14900 | 781.5 | 1561 | 2      | 0.0224 |

|                                                             |                                                                                                                                                                                                                          |                                                                                                                                                                                                                          |            |      |          |          |      |       |       |       |       |       |       |       |      |      |      |      |      |      |      |       |       |      |        |        |
|-------------------------------------------------------------|--------------------------------------------------------------------------------------------------------------------------------------------------------------------------------------------------------------------------|--------------------------------------------------------------------------------------------------------------------------------------------------------------------------------------------------------------------------|------------|------|----------|----------|------|-------|-------|-------|-------|-------|-------|-------|------|------|------|------|------|------|------|-------|-------|------|--------|--------|
| Histone H2B type 1-K OS=Homo sapiens GN=HIST1H2BK PE=1 SV=3 | 4 H2B1K_HUMAN,s p P10853  H2B1F_MOUSE,s p P10854  H2B1M_MOUSE,s p P57053  H2BFS_HUMAN,sp  P58876  H2B1D_HUMAN,sp  P62807  H2B1C_HUMAN,sp  P62808  H2B1_BOVIN,sp Q00715 H2B1_RAT,s p Q2M2T1 H2B1K_BOVIN,sp Q5QNW6 H2B2F_k | ILLP GELAK                                                                                                                                                                                                               | 73%        | 30.5 | 46.57056 | Ref      | -0.4 | 0.052 | -1.2  | -0.13 | -0.19 | -0.19 | -0.13 | 7280  | 5280 | 7810 | 3610 | 8530 | 7150 | 7470 | 7710 | 521.3 | 1561  | 3    | 0.0157 | 10.07  |
|                                                             | Histone H2B type 1-K OS=Homo sapiens GN=HIST1H2BK PE=1 SV=3                                                                                                                                                              | 4 H2B1K_HUMAN,s p P10853  H2B1F_MOUSE,s p P10854  H2B1M_MOUSE,s p P57053  H2BFS_HUMAN,sp  P58876  H2B1D_HUMAN,sp  P62807  H2B1C_HUMAN,sp  P62808  H2B1_BOVIN,sp Q00715 H2B1_RAT,s p Q2M2T1 H2B1K_BOVIN,sp Q5QNW6 H2B2F_k | ILLP GELAK | 71%  | 30.4     | 47.04794 | Ref  | -0.47 | -0.12 | -1    | -0.19 | -0.22 | -0.11 | -0.07 | 5140 | 3340 | 4620 | 2840 | 5480 | 4670 | 5250 | 5390  | 521.3 | 1561 | 3      | 0.0205 |





|                                                             |                                                                                                                                                                                                            |                |     |    |          |     |       |       |       |       |       |       |       |      |      |      |      |      |      |      |      |       |        |   |        |       |
|-------------------------------------------------------------|------------------------------------------------------------------------------------------------------------------------------------------------------------------------------------------------------------|----------------|-----|----|----------|-----|-------|-------|-------|-------|-------|-------|-------|------|------|------|------|------|------|------|------|-------|--------|---|--------|-------|
| Histone H2B type 1-K OS=Homo sapiens GN=HIST1H2BK PE=1 SV=3 | 4 H2B1K_HUMAN,sp P10853 H2B1F_MOUSE,s P10854 H2B1M_MOUSE,s P57053 H2BFS_HUMAN,sp P58876 H2B1D_HUMAN,sp P62807 H2B1C_HUMAN,sp P62808 H2B1_BOVIN,sp Q00715 H2B1_RAT,s P Q2M2T1 H2B1K_BOVIN,sp Q5QNW6 H2B2F_k | qVH PDT GISS k | 59% | 32 | 51.52047 | Ref | -0.35 | -0.1  | -0.78 | -0.23 | -0.25 | -0.17 | -0.06 | 4300 | 3340 | 4310 | 3030 | 4870 | 4200 | 4640 | 4950 | 728.4 | 1454.8 | 2 | 0.0115 | 7.871 |
| Histone H2B type 1-K OS=Homo sapiens GN=HIST1H2BK PE=1 SV=3 | 4 H2B1K_HUMAN,sp P10853 H2B1F_MOUSE,s P10854 H2B1M_MOUSE,s P57053 H2BFS_HUMAN,sp P58876 H2B1D_HUMAN,sp P62807 H2B1C_HUMAN,sp P62808 H2B1_BOVIN,sp Q00715 H2B1_RAT,s P Q2M2T1 H2B1K_BOVIN,sp Q5QNW6 H2B2F_k | qVH PDT GISS k | 88% | 42 | 53.3284  | Ref | -0.29 | -0.11 | -1.8  | -0.12 | -0.11 | -0.22 | -0    | 5890 | 4320 | 5320 | 1910 | 6550 | 5750 | 5560 | 6420 | 889   | 1776   | 2 | 0.0228 | 12.84 |

|                                                             |                                                                                                                                                                                                             |                    |     |      |          |     |       |       |       |       |       |       |       |       |       |       |       |       |       |       |       |       |      |   |        |       |
|-------------------------------------------------------------|-------------------------------------------------------------------------------------------------------------------------------------------------------------------------------------------------------------|--------------------|-----|------|----------|-----|-------|-------|-------|-------|-------|-------|-------|-------|-------|-------|-------|-------|-------|-------|-------|-------|------|---|--------|-------|
| Histone H2B type 1-K OS=Homo sapiens GN=HIST1H2BK PE=1 SV=3 | 4 H2B1K_HUMAN,sp P10853 H2B1F_MOUSE,sp P10854 H2B1M_MOUSE,sp P57053 H2BFS_HUMAN,sp P58876 H2B1D_HUMAN,sp P62807 H2B1C_HUMAN,sp P62808 H2B1_BOVIN,sp Q00715 H2B1_RAT,sp Q2M2T1 H2B1K_BOVIN,sp Q5QNW6 H2B2F_k | qVH<br>PDT<br>GISS | 87% | 41.6 | 53.2677  | Ref | -0.7  | 0.043 | -1.3  | -0.12 | -0.13 | -0.25 | -0.14 | 4740  | 2310  | 4210  | 1820  | 4640  | 4040  | 3880  | 4140  | 889   | 1776 | 2 | 0.0182 | 10.22 |
| Moesin OS=Bos taurus GN=MSN PE=2 SV=3                       | sp Q2HJ49 MOES_BOVIN,tr F1MZW0 F1MZW0_BOVIN,tr F6PUX2 F6PUX2_HORSE                                                                                                                                          | aQM<br>VQE<br>DLEK | 90% | 45.3 | 53.19312 | Ref | -0.39 | -0.04 | -0.15 | -0.23 | 0.075 | -0.55 | -0.2  | 24000 | 16400 | 22600 | 23500 | 24500 | 26500 | 17900 | 22700 | 600.3 | 1798 | 3 | 0.0189 | 10.52 |
| Moesin OS=Bos taurus GN=MSN PE=2 SV=3                       | sp Q2HJ49 MOES_BOVIN,tr F1MZW0 F1MZW0_BOVIN,tr F6PUX2 F6PUX2_HORSE                                                                                                                                          | aQM<br>VQE<br>DLEK | 95% | 61.6 | 53.23046 | Ref | -0.26 | -0.06 | -0.22 | -0.16 | -0.05 | -0.45 | -0.34 | 14800 | 10300 | 12900 | 12900 | 14900 | 14000 | 11100 | 11900 | 900   | 1798 | 2 | 0.0163 | 9.078 |

|                                             |                                                                                                    |                         |     |      |          |     |        |       |       |        |       |       |       |       |       |       |       |       |       |       |       |       |        |   |        |       |
|---------------------------------------------|----------------------------------------------------------------------------------------------------|-------------------------|-----|------|----------|-----|--------|-------|-------|--------|-------|-------|-------|-------|-------|-------|-------|-------|-------|-------|-------|-------|--------|---|--------|-------|
| Moesin OS=Bos<br>taurus GN=MSN<br>PE=2 SV=3 | sp Q2HJ4<br>9 MOES_<br>BOVIN,tr <br>F1MZW0 <br>F1MZW0_<br>BOVIN,tr <br>F6PUX2 F<br>6PUX2_H<br>ORSE | aQM<br>VQE<br>DLEK      | 95% | 62.2 | 53.21062 | Ref | -0.37  | -0.18 | -0.36 | -0.007 | 0.079 | -0.41 | -0.3  | 24300 | 16200 | 19900 | 19800 | 27800 | 25800 | 19200 | 20600 | 900   | 1798   | 2 | 0.0133 | 7.378 |
| Moesin OS=Bos<br>taurus GN=MSN<br>PE=2 SV=3 | sp Q2HJ4<br>9 MOES_<br>BOVIN,tr <br>F1MZW0 <br>F1MZW0_<br>BOVIN,tr <br>F6PUX2 F<br>6PUX2_H<br>ORSE | aQm<br>VQE<br>DLEK      | 77% | 38.2 | 53.16928 | Ref | -0.2   | -0.07 | -0.15 | -0.081 | -0.1  | -0.53 | -0.23 | 27200 | 22400 | 26700 | 28200 | 32700 | 28200 | 21900 | 26800 | 605.7 | 1814   | 3 | 0.0155 | 8.53  |
| Moesin OS=Bos<br>taurus GN=MSN<br>PE=2 SV=3 | sp Q2HJ4<br>9 MOES_<br>BOVIN,tr <br>F1MZW0 <br>F1MZW0_<br>BOVIN,tr <br>F6PUX2 F<br>6PUX2_H<br>ORSE | aQm<br>VQE<br>DLEK      | 87% | 41.2 | 53.16224 | Ref | -0.18  | -0.3  | -0.24 | -0.039 | 0.19  | -0.6  | -0.34 | 9410  | 7540  | 7490  | 8800  | 11100 | 11400 | 6860  | 8150  | 908   | 1814   | 2 | 0.0094 | 5.16  |
| Moesin OS=Bos<br>taurus GN=MSN<br>PE=2 SV=3 | sp Q2HJ4<br>9 MOES_<br>BOVIN,tr <br>F1MZW0 <br>F1MZW0_<br>BOVIN,tr <br>F6PUX2 F<br>6PUX2_H<br>ORSE | aQQ<br>ELEEE<br>QTR     | 95% | 53.8 | 51.46903 | Ref | -0.09  | -0.21 | -0.12 | -0.29  | -0.13 | -0.37 | -0.38 | 39200 | 30100 | 30100 | 35800 | 35100 | 34400 | 30300 | 29800 | 768.4 | 1534.8 | 2 | 0.013  | 8.486 |
| Moesin OS=Bos<br>taurus GN=MSN<br>PE=2 SV=3 | sp Q2HJ4<br>9 MOES_<br>BOVIN,tr <br>F1MZW0 <br>F1MZW0_<br>BOVIN,tr <br>F6PUX2 F<br>6PUX2_H<br>ORSE | eALL<br>QAS<br>QDQ<br>k | 94% | 50.5 | 53.01336 | Ref | -0.007 | -0.29 | -0.11 | -0.22  | -0.12 | -0.25 | -0.6  | 17200 | 14300 | 12800 | 16200 | 16600 | 15500 | 14800 | 11500 | 613.7 | 1838   | 3 | 0.0139 | 7.553 |

|                                             |                                                                                                    |                                  |     |      |          |     |        |       |       |        |       |       |       |       |       |       |       |       |       |       |       |       |        |   |        |       |
|---------------------------------------------|----------------------------------------------------------------------------------------------------|----------------------------------|-----|------|----------|-----|--------|-------|-------|--------|-------|-------|-------|-------|-------|-------|-------|-------|-------|-------|-------|-------|--------|---|--------|-------|
| Moesin OS=Bos<br>taurus GN=MSN<br>PE=2 SV=3 | sp Q2HJ4<br>9 MOES_<br>BOVIN,tr <br>F1MZW0 <br>F1MZW0_<br>BOVIN,tr <br>F6PUX2 F<br>6PUX2_H<br>ORSE | eALL<br>QAS<br>QDQ<br>k          | 95% | 54.5 | 53.01369 | Ref | -0.27  | -0.23 | -0.06 | -0.19  | -0.05 | -0.5  | -0.24 | 14500 | 10100 | 11300 | 14100 | 14200 | 13700 | 10500 | 12400 | 920   | 1838   | 2 | 0.0137 | 7.425 |
| Moesin OS=Bos<br>taurus GN=MSN<br>PE=2 SV=3 | sp Q2HJ4<br>9 MOES_<br>BOVIN,tr <br>F1MZW0 <br>F1MZW0_<br>BOVIN,tr <br>F6PUX2 F<br>6PUX2_H<br>ORSE | eRQ<br>EAEE<br>Ak                | 51% | 30.8 | 53.08761 | Ref | -0.074 | -0.3  | -0.28 | 0.045  | -0.05 | -0.43 | -0.44 | 32500 | 26800 | 24900 | 28300 | 39100 | 32100 | 25700 | 25200 | 425.2 | 1696.9 | 4 | 0.0095 | 5.6   |
| Moesin OS=Bos<br>taurus GN=MSN<br>PE=2 SV=3 | sp Q2HJ4<br>9 MOES_<br>BOVIN,tr <br>F1MZW0 <br>F1MZW0_<br>BOVIN,tr <br>F6PUX2 F<br>6PUX2_H<br>ORSE | eSEA<br>VEW<br>Qqk               | 95% | 59.4 | 53.42114 | Ref | -0.32  | -0.31 | -0.17 | -0.074 | 0.035 | -0.53 | -0.15 | 10300 | 7230  | 7860  | 9740  | 11500 | 10800 | 7650  | 9870  | 921.5 | 1841   | 2 | 0.0139 | 7.542 |
| Moesin OS=Bos<br>taurus GN=MSN<br>PE=2 SV=3 | sp Q2HJ4<br>9 MOES_<br>BOVIN,tr <br>F1MZW0 <br>F1MZW0_<br>BOVIN,tr <br>F6PUX2 F<br>6PUX2_H<br>ORSE | iDEF<br>ESm                      | 88% | 34   | 45.37995 | Ref | -1     | -0.55 | -0.05 | -0.59  | 0.23  | 0.75  | -0.32 | 1240  | 867   | 1320  | 2090  | 1580  | 2440  | 3670  | 1730  | 595.8 | 1189.5 | 2 | 0.0124 | 10.43 |
| Moesin OS=Bos<br>taurus GN=MSN<br>PE=2 SV=3 | sp Q2HJ4<br>9 MOES_<br>BOVIN,tr <br>F1MZW0 <br>F1MZW0_<br>BOVIN,tr <br>F6PUX2 F<br>6PUX2_H<br>ORSE | kTQE<br>QLAL<br>EMA<br>ELTA<br>R | 95% | 55.6 | 54.2453  | Ref | -0.016 | -0.2  | -0.18 | -0.095 | -0.04 | -0.4  | -0.45 | 11100 | 10400 | 9880  | 11300 | 13200 | 12000 | 9680  | 9290  | 814.1 | 2439.3 | 3 | 0.0168 | 6.879 |

|                                             |                                                                                                    |                                  |     |      |          |     |        |       |       |       |       |       |       |       |      |      |      |      |      |      |      |       |        |   |        |       |
|---------------------------------------------|----------------------------------------------------------------------------------------------------|----------------------------------|-----|------|----------|-----|--------|-------|-------|-------|-------|-------|-------|-------|------|------|------|------|------|------|------|-------|--------|---|--------|-------|
| Moesin OS=Bos<br>taurus GN=MSN<br>PE=2 SV=3 | sp Q2HJ4<br>9 MOES_<br>BOVIN,tr <br>F1MZW0 <br>F1MZW0_<br>BOVIN,tr <br>F6PUX2 F<br>6PUX2_H<br>ORSE | KTQE<br>QLAL<br>EMA<br>ELTA<br>R | 89% | 45.5 | 54.1288  | Ref | 0.052  | -0.41 | -0.13 | -0.19 | -0.09 | -0.39 | -0.26 | 2540  | 2410 | 1900 | 2590 | 2730 | 2560 | 2170 | 2370 | 814.1 | 2439.3 | 3 | 0.0131 | 5.367 |
| Moesin OS=Bos<br>taurus GN=MSN<br>PE=2 SV=3 | sp Q2HJ4<br>9 MOES_<br>BOVIN,tr <br>F1MZW0 <br>F1MZW0_<br>BOVIN,tr <br>F6PUX2 F<br>6PUX2_H<br>ORSE | KTQE<br>QLAL<br>EMA<br>ELTA<br>R | 92% | 48.6 | 54.07641 | Ref | 0.058  | -0.32 | -0.21 | -0.22 | -0.16 | -0.13 | -0.32 | 608   | 617  | 515  | 625  | 683  | 621  | 663  | 579  | 814.1 | 2439.4 | 3 | 0.0104 | 4.248 |
| Moesin OS=Bos<br>taurus GN=MSN<br>PE=2 SV=3 | sp Q2HJ4<br>9 MOES_<br>BOVIN,tr <br>F1MZW0 <br>F1MZW0_<br>BOVIN,tr <br>F6PUX2 F<br>6PUX2_H<br>ORSE | IFFL<br>QVk                      | 50% | 28   | 48.76201 | Ref | 0.33   | -0.55 | -0.16 | -0.2  | -0.46 | -0.13 | -0.64 | 8590  | 8720 | 5150 | 7550 | 8100 | 5920 | 7760 | 5390 | 752   | 1501.9 | 2 | 0.004  | 2.665 |
| Moesin OS=Bos<br>taurus GN=MSN<br>PE=2 SV=3 | sp Q2HJ4<br>9 MOES_<br>BOVIN,tr <br>F1MZW0 <br>F1MZW0_<br>BOVIN,tr <br>F6PUX2 F<br>6PUX2_H<br>ORSE | IFFL<br>QVk                      | 50% | 27.6 | 48.20747 | Ref | 0.29   | -0.57 | -0.24 | -0.39 | -0.42 | -0.18 | -0.11 | 2470  | 2630 | 1570 | 2220 | 2210 | 1880 | 2320 | 2420 | 501.7 | 1501.9 | 3 | 0.0023 | 1.545 |
| Moesin OS=Bos<br>taurus GN=MSN<br>PE=2 SV=3 | sp Q2HJ4<br>9 MOES_<br>BOVIN,tr <br>F1MZW0 <br>F1MZW0_<br>BOVIN,tr <br>F6PUX2 F<br>6PUX2_H<br>ORSE | qEAE<br>EAk                      | 52% | 31.4 | 51.96494 | Ref | -0.037 | -0.16 | -0.15 | -0.25 | -0.11 | -0.47 | -0.54 | 11400 | 8630 | 8570 | 9710 | 9980 | 9600 | 7840 | 7400 | 706.9 | 1411.8 | 2 | 0.0046 | 3.27  |

|                                                                                          |                                               |                                  |     |      |          |     |       |       |       |        |       |       |       |       |       |       |       |       |       |       |       |       |        |   |        |       |
|------------------------------------------------------------------------------------------|-----------------------------------------------|----------------------------------|-----|------|----------|-----|-------|-------|-------|--------|-------|-------|-------|-------|-------|-------|-------|-------|-------|-------|-------|-------|--------|---|--------|-------|
| Ras GTPase-activating protein-binding protein 1<br>OS=Bos taurus<br>GN=G3BP PE=2<br>SV=1 | sp Q32LC7 G3BP1_BOVIN, tr F1MQ98 F1MQ98_BOVIN | eAG<br>EQG<br>DVE<br>PR          | 95% | 49.1 | 49.8913  | Ref | 0.18  | -0.11 | 0.41  | -0.071 | 0.21  | -0.55 | 0.22  | 15600 | 15700 | 14000 | 22400 | 17700 | 18900 | 11600 | 19600 | 745.9 | 1489.7 | 2 | 0.0116 | 7.764 |
| Ras GTPase-activating protein-binding protein 1<br>OS=Bos taurus<br>GN=G3BP PE=2<br>SV=1 | sp Q32LC7 G3BP1_BOVIN, tr F1MQ98 F1MQ98_BOVIN | eAG<br>EQG<br>DVE<br>PR          | 94% | 47.8 | 49.97605 | Ref | 0.067 | -0.01 | 0.43  | -0.22  | 0.28  | -0.22 | 0.17  | 30600 | 32100 | 33100 | 50200 | 35400 | 43600 | 32200 | 41800 | 497.6 | 1489.7 | 3 | 0.0111 | 7.425 |
| Ras GTPase-activating protein-binding protein 1<br>OS=Bos taurus<br>GN=G3BP PE=2<br>SV=1 | sp Q32LC7 G3BP1_BOVIN, tr F1MQ98 F1MQ98_BOVIN | fMQ<br>TFVL<br>APE<br>GSV<br>Ank | 78% | 40.2 | 54.48298 | Ref | 0.39  | -0.31 | -0.06 | -0.013 | -0.07 | 0.23  | 0.064 | 854   | 902   | 601   | 801   | 914   | 768   | 990   | 873   | 783.1 | 2346.3 | 3 | 0.0126 | 5.381 |
| Ras GTPase-activating protein-binding protein 1<br>OS=Bos taurus<br>GN=G3BP PE=2<br>SV=1 | sp Q32LC7 G3BP1_BOVIN, tr F1MQ98 F1MQ98_BOVIN | fYVH<br>NDIF<br>R                | 64% | 33.6 | 51.86538 | Ref | 0.2   | -0.15 | 0.4   | -0.23  | 0.14  | -0.18 | 0.19  | 6570  | 6770  | 5760  | 9420  | 6710  | 7580  | 6350  | 8160  | 505.6 | 1513.8 | 3 | 0.0113 | 7.479 |
| Ras GTPase-activating protein-binding protein 1<br>OS=Bos taurus<br>GN=G3BP PE=2<br>SV=1 | sp Q32LC7 G3BP1_BOVIN, tr F1MQ98 F1MQ98_BOVIN | fYVH<br>NDIF<br>R                | 81% | 38.7 | 51.91359 | Ref | 0.15  | -0.27 | 0.37  | -0.18  | 0.077 | -0.13 | 0.35  | 11500 | 11600 | 9390  | 16400 | 12400 | 12900 | 11700 | 16200 | 505.6 | 1513.8 | 3 | 0.0093 | 6.152 |

|                                                                                          |                                               |                                         |     |      |          |     |      |       |       |       |       |       |       |       |       |       |       |       |       |       |       |       |        |   |        |       |
|------------------------------------------------------------------------------------------|-----------------------------------------------|-----------------------------------------|-----|------|----------|-----|------|-------|-------|-------|-------|-------|-------|-------|-------|-------|-------|-------|-------|-------|-------|-------|--------|---|--------|-------|
| Ras GTPase-activating protein-binding protein 1<br>OS=Bos taurus<br>GN=G3BP PE=2<br>SV=1 | sp Q32LC7 G3BP1_BOVIN, tr F1MQ98 F1MQ98_BOVIN | kVM<br>SQN<br>FTNc<br>HTk               | 83% | 40.5 | 54.87616 | Ref | 0.19 | -0.21 | 0.29  | 0.004 | 0.11  | -0.05 | 0.08  | 25400 | 25500 | 20800 | 33100 | 30000 | 28100 | 26300 | 28600 | 624.8 | 2495.3 | 4 | 0.0336 | 13.46 |
| Ras GTPase-activating protein-binding protein 1<br>OS=Bos taurus<br>GN=G3BP PE=2<br>SV=1 | sp Q32LC7 G3BP1_BOVIN, tr F1MQ98 F1MQ98_BOVIN | nLPP<br>SGA<br>VPVT<br>GIPP<br>HVV<br>k | 95% | 52.6 | 50.53989 | Ref | 0.14 | 0.038 | 0.029 | -0.12 | -0    | 0.054 | 0.16  | 1350  | 1190  | 1200  | 1340  | 1330  | 1260  | 1370  | 1460  | 829.8 | 2486.5 | 3 | 0.0193 | 7.768 |
| Ras GTPase-activating protein-binding protein 1<br>OS=Bos taurus<br>GN=G3BP PE=2<br>SV=1 | sp Q32LC7 G3BP1_BOVIN, tr F1MQ98 F1MQ98_BOVIN | nLPP<br>SGA<br>VPVT<br>GIPP<br>HVV<br>k | 95% | 49.3 | 50.45499 | Ref | 0.34 | -0.21 | 0.18  | -0.12 | 0.18  | -0.17 | 0.11  | 1340  | 1430  | 1060  | 1560  | 1390  | 1490  | 1220  | 1470  | 829.8 | 2486.5 | 3 | 0.0181 | 7.261 |
| Ras GTPase-activating protein-binding protein 1<br>OS=Bos taurus<br>GN=G3BP PE=2<br>SV=1 | sp Q32LC7 G3BP1_BOVIN, tr F1MQ98 F1MQ98_BOVIN | qYYT<br>LLNQ<br>APD<br>MLH<br>R         | 95% | 68.4 | 53.90262 | Ref | 0.27 | -0.02 | -0.06 | 0.13  | -0.2  | 0.053 | 0.077 | 4200  | 4000  | 3560  | 3880  | 4870  | 3390  | 4210  | 4250  | 723   | 2166.1 | 3 | 0.0145 | 6.697 |
| Ras GTPase-activating protein-binding protein 1<br>OS=Bos taurus<br>GN=G3BP PE=2<br>SV=1 | sp Q32LC7 G3BP1_BOVIN, tr F1MQ98 F1MQ98_BOVIN | qYYT<br>LLNQ<br>APD<br>MLH<br>R         | 95% | 62.5 | 53.94289 | Ref | 0.4  | 0.079 | 0.008 | 0.076 | 0.029 | -0.16 | 0.063 | 781   | 980   | 849   | 907   | 1050  | 885   | 812   | 940   | 723   | 2166.1 | 3 | 0.0136 | 6.282 |

|                                                                                          |                                               |                                 |     |      |          |     |      |       |       |       |       |       |      |      |      |      |       |       |       |      |       |       |        |   |        |       |
|------------------------------------------------------------------------------------------|-----------------------------------------------|---------------------------------|-----|------|----------|-----|------|-------|-------|-------|-------|-------|------|------|------|------|-------|-------|-------|------|-------|-------|--------|---|--------|-------|
| Ras GTPase-activating protein-binding protein 1<br>OS=Bos taurus<br>GN=G3BP PE=2<br>SV=1 | sp Q32LC7 G3BP1_BOVIN, tr F1MQ98 F1MQ98_BOVIN | qYYT<br>LLNQ<br>APD<br>MLH<br>R | 89% | 45.5 | 53.97194 | Ref | 0.45 | 0.15  | -0.05 | 0.002 | -0.28 | -0.02 | 0.16 | 858  | 1080 | 955  | 933   | 1060  | 765   | 957  | 1070  | 723   | 2166.1 | 3 | 0.0107 | 4.925 |
| Ras GTPase-activating protein-binding protein 1<br>OS=Bos taurus<br>GN=G3BP PE=2<br>SV=1 | sp Q32LC7 G3BP1_BOVIN, tr F1MQ98 F1MQ98_BOVIN | qYYT<br>LLNQ<br>APD<br>MLH<br>R | 78% | 38.4 | 54.85584 | Ref | 0.33 | -0.21 | 0.23  | -0.19 | -0.12 | 0.078 | 0.21 | 1140 | 1240 | 924  | 1410  | 1160  | 1060  | 1270 | 1390  | 618.6 | 2470.3 | 4 | 0.0155 | 6.268 |
| Ras GTPase-activating protein-binding protein 1<br>OS=Bos taurus<br>GN=G3BP PE=2<br>SV=1 | sp Q32LC7 G3BP1_BOVIN, tr F1MQ98 F1MQ98_BOVIN | qYYT<br>LLNQ<br>APD<br>MLH<br>R | 94% | 52   | 54.81725 | Ref | 0.28 | -0.25 | 0.37  | -0.15 | -0.04 | -0.17 | 0.22 | 1040 | 1060 | 790  | 1360  | 1050  | 987   | 944  | 1220  | 824.4 | 2470.3 | 3 | 0.0092 | 3.705 |
| Ras GTPase-activating protein-binding protein 1<br>OS=Bos taurus<br>GN=G3BP PE=2<br>SV=1 | sp Q32LC7 G3BP1_BOVIN, tr F1MQ98 F1MQ98_BOVIN | sEPV<br>LEET<br>APE<br>DVQ<br>k | 94% | 51.2 | 54.59955 | Ref | 0.19 | -0.13 | 0.26  | -0.14 | 0.27  | -0.23 | 0.11 | 9810 | 9570 | 8310 | 12200 | 10200 | 11900 | 8760 | 11000 | 760.4 | 2278.2 | 3 | 0.0107 | 4.675 |
| Ras GTPase-activating protein-binding protein 1<br>OS=Bos taurus<br>GN=G3BP PE=2<br>SV=1 | sp Q32LC7 G3BP1_BOVIN, tr F1MQ98 F1MQ98_BOVIN | tFSW<br>ASVT<br>Sk              | 95% | 59.2 | 52.8693  | Ref | 0.18 | -0.35 | 0.48  | -0.14 | 0.1   | -0.29 | 0.17 | 5880 | 5380 | 4050 | 8110  | 5800  | 5990  | 4750 | 6510  | 861.5 | 1720.9 | 2 | 0.0172 | 9.977 |



|                                                                                 |                                                                                                                                                                                                                             |                  |     |      |          |     |                            |      |       |       |      |       |      |      |                            |      |      |      |      |      |      |       |        |   |        |       |
|---------------------------------------------------------------------------------|-----------------------------------------------------------------------------------------------------------------------------------------------------------------------------------------------------------------------------|------------------|-----|------|----------|-----|----------------------------|------|-------|-------|------|-------|------|------|----------------------------|------|------|------|------|------|------|-------|--------|---|--------|-------|
| Ras GTPase-activating protein-binding protein 1 OS=Bos taurus GN=G3BP PE=2 SV=1 | sp Q32LC7 G3BP1_BOVIN, tr F1MQ98 F1MQ98_BOVIN                                                                                                                                                                               | tFSW ASVT Sk     | 58% | 33.5 | 52.84679 | Ref | 0.15                       | 0.06 | 0.082 | -0.12 | 0.12 | -0.08 | 0.25 | 4630 | 4630                       | 4730 | 5390 | 5150 | 5330 | 4860 | 6050 | 574.7 | 1721   | 3 | 0.0098 | 5.671 |
| Calmodulin OS=Bos taurus GN=CALM PE=1 SV=2                                      | 7 CALM_BOVIN, sp P62158 CALM_HUMAN, sp P62160 CALM_RABBIT, sp P62161 CALM_RAT, sp P62204 CALM_MOUSE, sp Q5RAD2 CALM_PONAB, sp Q6YNX6 CALM_SHEEP, tr A5A6L2 A5A6L2_PANTR, tr B2RDW0 B2RDW0_HUMAN, tr B2ZPE9 B2ZPE9_CAVPO, tr | aDQ LTEE QIAE Fk | 95% | 70.3 | 52.67719 | Ref | Value Missing (-1.7200047) | 0.54 | 0.16  | 0.48  | 1.1  | -0.23 | 0.7  | 233  | Value Missing (-1.7200047) | 406  | 349  | 480  | 646  | 267  | 507  | 934.5 | 1866.9 | 2 | 0.0162 | 8.677 |

|                                            |                                                                                                                                                                                                                      |               |     |      |          |     |                            |      |      |      |      |       |      |       |       |       |       |       |       |       |       |        |        |        |        |       |
|--------------------------------------------|----------------------------------------------------------------------------------------------------------------------------------------------------------------------------------------------------------------------|---------------|-----|------|----------|-----|----------------------------|------|------|------|------|-------|------|-------|-------|-------|-------|-------|-------|-------|-------|--------|--------|--------|--------|-------|
| Calmodulin OS=Bos taurus GN=CALM PE=1 SV=2 | 7 CALM_BOVIN,sp P62158 CALM_HUMAN,sp P62160 CALM_RABIT,sp P62161 CALM_RAT,sp P62204 CALM_MOUSE,sp Q5RAD2 CALM_PONAB,sp Q6YNX6 CALM_SHEEP, tr A5A6L2 A5A6L2_PANTR, tr B2RDW0 B2RDW0_HUMAN, tr B2ZPE9 B2ZPE9_CAVPO, tr | aDQ LTEE QIAE | 95% | 56.1 | 52.66805 | Ref | Value Missing (-1.7627269) | 0.44 | 0.27 | 0.79 | 1.1  | -0.25 | 0.31 | 1889) | 257   | 258   | 406   | 426   | 180   | 263   | 934.5 | 1866.9 | 2      | 0.0151 | 8.088  |       |
| Calmodulin OS=Bos taurus GN=CALM PE=1 SV=2 | 7 CALM_BOVIN,sp P62158 CALM_HUMAN,sp P62160 CALM_RABIT,sp P62161 CALM_RAT,sp P62204 CALM_MOUSE,sp Q5RAD2 CALM_PONAB,sp Q6YNX6 CALM_SHEEP, tr A5A6L2 A5A6L2_PANTR, tr B2RDW0 B2RDW0_HUMAN, tr B2ZPE9 B2ZPE9_CAVPO, tr | dGD GTIT Tk   | 86% | 39.6 | 52.07411 | Ref | -0.44                      | 0.41 | 0.29 | 0.27 | 0.74 | -0.3  | 0.43 | 36900 | 17400 | 34100 | 35200 | 38300 | 46400 | 23500 | 38600 | 758.4  | 1514.8 | 2      | 0.0216 | 14.24 |

|                                            |                                                                                                                                                                                                                      |                                   |     |      |          |     |       |      |      |      |      |      |      |       |       |       |        |        |       |       |        |       |        |   |        |       |
|--------------------------------------------|----------------------------------------------------------------------------------------------------------------------------------------------------------------------------------------------------------------------|-----------------------------------|-----|------|----------|-----|-------|------|------|------|------|------|------|-------|-------|-------|--------|--------|-------|-------|--------|-------|--------|---|--------|-------|
| Calmodulin OS=Bos taurus GN=CALM PE=1 SV=2 | 7 CALM_BOVIN,sp P62158 CALM_HUMAN,sp P62160 CALM_RABIT,sp P62161 CALM_RAT,sp P62204 CALM_MOUSE,sp Q5RAD2 CALM_PONAB,sp Q6YNX6 CALM_SHEEP, tr A5A6L2 A5A6L2_PANTR, tr B2RDW0 B2RDW0_HUMAN, tr B2ZPE9 B2ZPE9_CAVPO, tr | dTDS<br>EEEI<br>R                 | 55% | 28   | 48.02486 | Ref | -0.58 | 0.57 | 0.34 | 0.27 | 0.67 | 0.16 | 0.42 | 40700 | 23800 | 57200 | 54600  | 57400  | 66200 | 48300 | 57400  | 699.3 | 1396.7 | 2 | 0.0108 | 7.757 |
| Calmodulin OS=Bos taurus GN=CALM PE=1 SV=2 | 7 CALM_BOVIN,sp P62158 CALM_HUMAN,sp P62160 CALM_RABIT,sp P62161 CALM_RAT,sp P62204 CALM_MOUSE,sp Q5RAD2 CALM_PONAB,sp Q6YNX6 CALM_SHEEP, tr A5A6L2 A5A6L2_PANTR, tr B2RDW0 B2RDW0_HUMAN, tr B2ZPE9 B2ZPE9_CAVPO, tr | eAFS<br>LFDK<br>DGD<br>GTIT<br>TK | 90% | 47.7 | 55.19257 | Ref | -1.1  | 0.33 | 0.36 | 0.45 | 0.91 | -0.2 | 0.58 | 79700 | 30900 | 89500 | 103000 | 120000 | 1E+05 | 69600 | 119000 | 919.8 | 2756.5 | 3 | 0.0367 | 13.3  |

|                                            |                                                                                                                                                                                                                      |                      |     |      |          |     |       |      |      |      |      |       |      |       |       |       |       |       |       |       |       |       |        |   |        |       |
|--------------------------------------------|----------------------------------------------------------------------------------------------------------------------------------------------------------------------------------------------------------------------|----------------------|-----|------|----------|-----|-------|------|------|------|------|-------|------|-------|-------|-------|-------|-------|-------|-------|-------|-------|--------|---|--------|-------|
| Calmodulin OS=Bos taurus GN=CALM PE=1 SV=2 | 7 CALM_BOVIN,sp P62158 CALM_HUMAN,sp P62160 CALM_RABIT,sp P62161 CALM_RAT,sp P62204 CALM_MOUSE,sp Q5RAD2 CALM_PONAB,sp Q6YNX6 CALM_SHEEP, tr A5A6L2 A5A6L2_PANTR, tr B2RDW0 B2RDW0_HUMAN, tr B2ZPE9 B2ZPE9_CAVPO, tr | eAFSLFDK DGD GTIT Tk | 74% | 37.2 | 54.93047 | Ref | -0.72 | 0.28 | 0.25 | 0.6  | 0.66 | 0.081 | 0.55 | 59100 | 29600 | 64500 | 70900 | 99400 | 90700 | 63300 | 86700 | 690.1 | 2756.5 | 4 | 0.016  | 5.795 |
| Calmodulin OS=Bos taurus GN=CALM PE=1 SV=2 | 7 CALM_BOVIN,sp P62158 CALM_HUMAN,sp P62160 CALM_RABIT,sp P62161 CALM_RAT,sp P62204 CALM_MOUSE,sp Q5RAD2 CALM_PONAB,sp Q6YNX6 CALM_SHEEP, tr A5A6L2 A5A6L2_PANTR, tr B2RDW0 B2RDW0_HUMAN, tr B2ZPE9 B2ZPE9_CAVPO, tr | eAFSLFDK DGD GTIT Tk | 64% | 35.2 | 55.15113 | Ref | -0.2  | 0.34 | 0.25 | 0.33 | 0.55 | 0.17  | 0.57 | 5430  | 4020  | 6350  | 6690  | 7770  | 7900  | 6340  | 8350  | 690.1 | 2756.5 | 4 | 0.0348 | 12.61 |

|                                            |                                                                                                                                                                                                                      |                                   |     |      |          |     |       |      |      |      |      |       |      |      |      |       |       |       |       |      |       |       |        |   |        |       |
|--------------------------------------------|----------------------------------------------------------------------------------------------------------------------------------------------------------------------------------------------------------------------|-----------------------------------|-----|------|----------|-----|-------|------|------|------|------|-------|------|------|------|-------|-------|-------|-------|------|-------|-------|--------|---|--------|-------|
| Calmodulin OS=Bos taurus GN=CALM PE=1 SV=2 | 7 CALM_BOVIN,sp P62158 CALM_HUMAN,sp P62160 CALM_RABIT,sp P62161 CALM_RAT,sp P62204 CALM_MOUSE,sp Q5RAD2 CALM_PONAB,sp Q6YNX6 CALM_SHEEP, tr A5A6L2 A5A6L2_PANTR, tr B2RDW0 B2RDW0_HUMAN, tr B2ZPE9 B2ZPE9_CAVPO, tr | eAFS<br>LFDK<br>DGD<br>GTIT<br>Tk | 89% | 46.1 | 55.03033 | Ref | -0.77 | 0.42 | 0.42 | 0.42 | 0.76 | -0.04 | 0.55 | 7730 | 4140 | 10200 | 11500 | 12700 | 14000 | 8400 | 12500 | 919.8 | 2756.5 | 3 | 0.0242 | 8.785 |
| Calmodulin OS=Bos taurus GN=CALM PE=1 SV=2 | 7 CALM_BOVIN,sp P62158 CALM_HUMAN,sp P62160 CALM_RABIT,sp P62161 CALM_RAT,sp P62204 CALM_MOUSE,sp Q5RAD2 CALM_PONAB,sp Q6YNX6 CALM_SHEEP, tr A5A6L2 A5A6L2_PANTR, tr B2RDW0 B2RDW0_HUMAN, tr B2ZPE9 B2ZPE9_CAVPO, tr | eAFS<br>LFDK<br>DGD<br>GTIT<br>Tk | 67% | 37.4 | 55.02775 | Ref | -0.63 | 0.19 | 0.21 | 0.46 | 0.91 | 0.019 | 0.52 | 964  | 526  | 1010  | 1150  | 1510  | 1790  | 1010 | 1420  | 919.8 | 2756.5 | 3 | 0.0237 | 8.589 |

|                                            |                                                                                                                                                                                                                      |                 |     |      |          |     |       |      |      |      |      |       |      |       |       |       |       |       |       |       |       |       |        |   |        |       |
|--------------------------------------------|----------------------------------------------------------------------------------------------------------------------------------------------------------------------------------------------------------------------|-----------------|-----|------|----------|-----|-------|------|------|------|------|-------|------|-------|-------|-------|-------|-------|-------|-------|-------|-------|--------|---|--------|-------|
| Calmodulin OS=Bos taurus GN=CALM PE=1 SV=2 | 7 CALM_BOVIN,sp P62158 CALM_HUMAN,sp P62160 CALM_RABIT,sp P62161 CALM_RAT,sp P62204 CALM_MOUSE,sp Q5RAD2 CALM_PONAB,sp Q6YNX6 CALM_SHEEP, tr A5A6L2 A5A6L2_PANTR, tr B2RDW0 B2RDW0_HUMAN, tr B2ZPE9 B2ZPE9_CAVPO, tr | kMk DTD SEEE IR | 52% | 29   | 54.66858 | Ref | -0.72 | 0.17 | 0.34 | 0.44 | 0.96 | 0.041 | 0.68 | 36400 | 25700 | 51600 | 65300 | 76900 | 96100 | 53200 | 82300 | 479.5 | 2392.3 | 5 | 0.032  | 13.36 |
| Calmodulin OS=Bos taurus GN=CALM PE=1 SV=2 | 7 CALM_BOVIN,sp P62158 CALM_HUMAN,sp P62160 CALM_RABIT,sp P62161 CALM_RAT,sp P62204 CALM_MOUSE,sp Q5RAD2 CALM_PONAB,sp Q6YNX6 CALM_SHEEP, tr A5A6L2 A5A6L2_PANTR, tr B2RDW0 B2RDW0_HUMAN, tr B2ZPE9 B2ZPE9_CAVPO, tr | mkD TDSE EEIR   | 55% | 32.7 | 52.86337 | Ref | -1.1  | 0.34 | 0.37 | 0.45 | 0.75 | -0.1  | 0.6  | 4790  | 1720  | 4960  | 5680  | 6630  | 7110  | 4130  | 6650  | 981   | 1960   | 2 | 0.0188 | 9.578 |

|                                            |                                                                                                                                                                                                                      |                                  |     |      |          |     |       |      |      |      |      |       |      |       |      |       |       |       |       |       |       |       |        |   |        |       |
|--------------------------------------------|----------------------------------------------------------------------------------------------------------------------------------------------------------------------------------------------------------------------|----------------------------------|-----|------|----------|-----|-------|------|------|------|------|-------|------|-------|------|-------|-------|-------|-------|-------|-------|-------|--------|---|--------|-------|
| Calmodulin OS=Bos taurus GN=CALM PE=1 SV=2 | 7 CALM_BOVIN,sp P62158 CALM_HUMAN,sp P62160 CALM_RABIT,sp P62161 CALM_RAT,sp P62204 CALM_MOUSE,sp Q5RAD2 CALM_PONAB,sp Q6YNX6 CALM_SHEEP, tr A5A6L2 A5A6L2_PANTR, tr B2RDW0 B2RDW0_HUMAN, tr B2ZPE9 B2ZPE9_CAVPO, tr | mkD<br>TDSE<br>EEIR              | 76% | 37.1 | 52.87388 | Ref | -0.85 | 0.63 | 0.31 | 0.45 | 0.77 | -0.24 | 0.45 | 4320  | 1980 | 6010  | 5390  | 6530  | 7160  | 3710  | 5920  | 981   | 1960   | 2 | 0.0187 | 9.517 |
| Calmodulin OS=Bos taurus GN=CALM PE=1 SV=2 | 7 CALM_BOVIN,sp P62158 CALM_HUMAN,sp P62160 CALM_RABIT,sp P62161 CALM_RAT,sp P62204 CALM_MOUSE,sp Q5RAD2 CALM_PONAB,sp Q6YNX6 CALM_SHEEP, tr A5A6L2 A5A6L2_PANTR, tr B2RDW0 B2RDW0_HUMAN, tr B2ZPE9 B2ZPE9_CAVPO, tr | vFDK<br>DGn<br>GYIS<br>AAEL<br>R | 51% | 34.4 | 54.82635 | Ref | -1.3  | 0.27 | 0.28 | 0.45 | 0.82 | 0.22  | 0.84 | 20300 | 9360 | 29900 | 33900 | 41900 | 47400 | 32700 | 49700 | 788.8 | 2363.2 | 3 | 0.0232 | 9.83  |

|                                            |                                                                                                                                                                                                                      |                                  |     |      |          |     |       |      |       |      |      |       |      |       |       |       |        |        |       |       |        |       |        |   |        |       |
|--------------------------------------------|----------------------------------------------------------------------------------------------------------------------------------------------------------------------------------------------------------------------|----------------------------------|-----|------|----------|-----|-------|------|-------|------|------|-------|------|-------|-------|-------|--------|--------|-------|-------|--------|-------|--------|---|--------|-------|
| Calmodulin OS=Bos taurus GN=CALM PE=1 SV=2 | 7 CALM_BOVIN,sp P62158 CALM_HUMAN,sp P62160 CALM_RABIT,sp P62161 CALM_RAT,sp P62204 CALM_MOUSE,sp Q5RAD2 CALM_PONAB,sp Q6YNX6 CALM_SHEEP, tr A5A6L2 A5A6L2_PANTR, tr B2RDW0 B2RDW0_HUMAN, tr B2ZPE9 B2ZPE9_CAVPO, tr | vFDK<br>DGn<br>GYIS<br>AAEL<br>R | 73% | 37.1 | 54.94635 | Ref | -0.82 | 0.34 | 0.19  | 0.48 | 0.87 | 0.12  | 0.61 | 12400 | 6930  | 16800 | 17000  | 23000  | 26300 | 16400 | 22700  | 591.8 | 2363.2 | 4 | 0.018  | 7.595 |
| Calmodulin OS=Bos taurus GN=CALM PE=1 SV=2 | 7 CALM_BOVIN,sp P62158 CALM_HUMAN,sp P62160 CALM_RABIT,sp P62161 CALM_RAT,sp P62204 CALM_MOUSE,sp Q5RAD2 CALM_PONAB,sp Q6YNX6 CALM_SHEEP, tr A5A6L2 A5A6L2_PANTR, tr B2RDW0 B2RDW0_HUMAN, tr B2ZPE9 B2ZPE9_CAVPO, tr | vFDK<br>DGn<br>GYIS<br>AAEL<br>R | 56% | 35.3 | 54.94844 | Ref | -0.82 | 0.24 | 0.099 | 0.5  | 0.83 | 0.002 | 0.69 | 99900 | 46600 | 1E+05 | 107000 | 156000 | 2E+05 | 1E+05 | 161000 | 788.8 | 2363.3 | 3 | 0.0066 | 2.788 |



|                                            |                                                                                                                                                                                                                      |                      |     |      |          |     |       |      |      |      |      |       |      |      |      |      |      |       |       |      |       |       |        |   |        |       |
|--------------------------------------------|----------------------------------------------------------------------------------------------------------------------------------------------------------------------------------------------------------------------|----------------------|-----|------|----------|-----|-------|------|------|------|------|-------|------|------|------|------|------|-------|-------|------|-------|-------|--------|---|--------|-------|
| Calmodulin OS=Bos taurus GN=CALM PE=1 SV=2 | 7 CALM_BOVIN,sp P62158 CALM_HUMAN,sp P62160 CALM_RABIT,sp P62161 CALM_RAT,sp P62204 CALM_MOUSE,sp Q5RAD2 CALM_PONAB,sp Q6YNX6 CALM_SHEEP, tr A5A6L2 A5A6L2_PANTR, tr B2RDW0 B2RDW0_HUMAN, tr B2ZPE9 B2ZPE9_CAVPO, tr | vFDK DGn GYIS AAEL R | 74% | 37.3 | 54.94664 | Ref | -0.81 | 0.38 | 0.24 | 0.45 | 0.74 | -0    | 0.73 | 6430 | 3390 | 8400 | 8550 | 10900 | 11600 | 7270 | 12000 | 591.8 | 2363.3 | 4 | 0.0033 | 1.403 |
| Calmodulin OS=Bos taurus GN=CALM PE=1 SV=2 | 7 CALM_BOVIN,sp P62158 CALM_HUMAN,sp P62160 CALM_RABIT,sp P62161 CALM_RAT,sp P62204 CALM_MOUSE,sp Q5RAD2 CALM_PONAB,sp Q6YNX6 CALM_SHEEP, tr A5A6L2 A5A6L2_PANTR, tr B2RDW0 B2RDW0_HUMAN, tr B2ZPE9 B2ZPE9_CAVPO, tr | vFDK DGn GYIS AAEL R | 64% | 36.7 | 54.94772 | Ref | -0.48 | 0.24 | 0.33 | 0.39 | 0.69 | 0.089 | 0.68 | 1740 | 1150 | 2060 | 2460 | 2820  | 3040  | 2090 | 3120  | 788.8 | 2363.2 | 3 | 0.0117 | 4.957 |

|                                                                  |                                |                            |     |      |          |     |       |       |       |        |       |       |       |       |       |       |        |        |       |       |        |       |        |   |        |       |
|------------------------------------------------------------------|--------------------------------|----------------------------|-----|------|----------|-----|-------|-------|-------|--------|-------|-------|-------|-------|-------|-------|--------|--------|-------|-------|--------|-------|--------|---|--------|-------|
| Uncharacterized protein (Fragment)<br>OS=Bos taurus PE=4<br>SV=1 | tr F1MCK<br>2 F1MCK<br>2_BOVIN | aDID<br>ISGP<br>k          | 89% | 41.2 | 51.56422 | Ref | -0.5  | -0.28 | -0.37 | -0.24  | -0.05 | -0.48 | -0.28 | 18600 | 12000 | 15200 | 16000  | 19300  | 19200 | 15000 | 17000  | 762.4 | 1522.9 | 2 | 0.0102 | 6.706 |
| Uncharacterized protein (Fragment)<br>OS=Bos taurus PE=4<br>SV=1 | tr F1MCK<br>2 F1MCK<br>2_BOVIN | aDID<br>VSAP<br>k          | 93% | 44.5 | 51.5122  | Ref | -0.65 | -0.32 | -0.4  | -0.24  | -0.01 | -0.67 | -0.15 | 28500 | 15400 | 20900 | 22300  | 27300  | 28100 | 18500 | 26300  | 762.4 | 1522.9 | 2 | 0.0084 | 5.511 |
| Uncharacterized protein (Fragment)<br>OS=Bos taurus PE=4<br>SV=1 | tr F1MCK<br>2 F1MCK<br>2_BOVIN | aDID<br>VSG<br>Pk          | 93% | 44.2 | 51.98503 | Ref | -0.69 | -0.38 | -0.21 | -0.006 | -0.05 | -0.82 | -0.37 | 2E+05 | 82600 | 1E+05 | 141000 | 178000 | 2E+05 | 92800 | 126000 | 755.4 | 1508.9 | 2 | 0.0151 | 10.01 |
| Uncharacterized protein (Fragment)<br>OS=Bos taurus PE=4<br>SV=1 | tr F1MCK<br>2 F1MCK<br>2_BOVIN | aEGP<br>DMA<br>VDLP<br>k   | 90% | 43.8 | 53.61519 | Ref | -1    | -0.18 | -0.48 | -0.082 | -0.17 | -0.53 | -0.49 | 14400 | 4800  | 9410  | 8570   | 12500  | 10200 | 8350  | 8510   | 926   | 1850   | 2 | 0.0161 | 8.689 |
| Uncharacterized protein (Fragment)<br>OS=Bos taurus PE=4<br>SV=1 | tr F1MCK<br>2 F1MCK<br>2_BOVIN | aEGP<br>DMA<br>VDLP<br>k   | 91% | 46.5 | 53.63033 | Ref | -0.59 | -0.25 | -0.3  | -0.1   | 0.064 | -0.66 | 0.067 | 8660  | 8030  | 11000 | 11900  | 15000  | 14800 | 9310  | 15300  | 617.7 | 1850   | 3 | 0.015  | 8.098 |
| Uncharacterized protein (Fragment)<br>OS=Bos taurus PE=4<br>SV=1 | tr F1MCK<br>2 F1MCK<br>2_BOVIN | iSMP<br>DIDL<br>NLkG<br>Pk | 66% | 31.4 | 50.98433 | Ref | -0.86 | -0.41 | -0.21 | 0.023  | -0.05 | -0.48 | -0.2  | 13800 | 7750  | 11400 | 14800  | 19100  | 15900 | 12300 | 14800  | 614.1 | 2452.4 | 4 | 0.0072 | 2.934 |

|                                                                  |                                |                                        |     |      |          |     |       |       |       |        |       |       |       |       |       |       |       |       |       |       |       |       |        |   |        |       |
|------------------------------------------------------------------|--------------------------------|----------------------------------------|-----|------|----------|-----|-------|-------|-------|--------|-------|-------|-------|-------|-------|-------|-------|-------|-------|-------|-------|-------|--------|---|--------|-------|
| Uncharacterized protein (Fragment)<br>OS=Bos taurus PE=4<br>SV=1 | tr F1MCK<br>2 F1MCK<br>2_BOVIN | iSMP<br>DIDL<br>nLkG<br>Pk             | 55% | 30.5 | 52.07734 | Ref | -0.58 | -0.52 | -0.41 | -0.11  | 0.071 | -0.31 | -0.17 | 3520  | 2540  | 2870  | 3490  | 4700  | 4670  | 3740  | 4090  | 614.4 | 2453.4 | 4 | 0.0167 | 6.816 |
| Uncharacterized protein (Fragment)<br>OS=Bos taurus PE=4<br>SV=1 | tr F1MCK<br>2 F1MCK<br>2_BOVIN | mDIE<br>GPE<br>Vk                      | 83% | 39.1 | 52.61085 | Ref | -0.65 | -0.25 | -0.4  | -0.15  | 0.009 | -0.61 | -0.35 | 49500 | 27000 | 38800 | 39300 | 51300 | 50100 | 34100 | 40600 | 813.4 | 1624.9 | 2 | 0.0228 | 14.02 |
| Uncharacterized protein (Fragment)<br>OS=Bos taurus PE=4<br>SV=1 | tr F1MCK<br>2 F1MCK<br>2_BOVIN | mDIE<br>GPE<br>Vk                      | 64% | 34.5 | 52.54983 | Ref | -0.13 | -0.07 | -0.43 | -0.38  | -0.49 | -0.57 | -0.35 | 14900 | 11300 | 12800 | 11200 | 12800 | 10300 | 10200 | 11800 | 542.6 | 1624.9 | 3 | 0.006  | 3.704 |
| Uncharacterized protein (Fragment)<br>OS=Bos taurus PE=4<br>SV=1 | tr F1MCK<br>2 F1MCK<br>2_BOVIN | vDID<br>APD<br>VNV<br>HGP<br>DWH<br>Lk | 95% | 55.9 | 55.29953 | Ref | -0.7  | -0.43 | -0.54 | -0.065 | -0.04 | -0.3  | -0.28 | 6750  | 3650  | 4770  | 4970  | 7610  | 6780  | 5880  | 5940  | 879.1 | 2634.4 | 3 | 0.0185 | 7.037 |
| Uncharacterized protein (Fragment)<br>OS=Bos taurus PE=4<br>SV=1 | tr F1MCK<br>2 F1MCK<br>2_BOVIN | vDID<br>APD<br>VnV<br>HGP<br>DWH<br>Lk | 93% | 47.8 | 55.18826 | Ref | -0.47 | -0.53 | -0.38 | -0.13  | -0.09 | -0.49 | -0.55 | 29300 | 15800 | 16500 | 20500 | 26800 | 24100 | 19100 | 18100 | 659.8 | 2635.4 | 4 | 0.0231 | 8.754 |
| Uncharacterized protein (Fragment)<br>OS=Bos taurus PE=4<br>SV=1 | tr F1MCK<br>2 F1MCK<br>2_BOVIN | vDIE<br>GPD<br>VHLE<br>GPE<br>Gk       | 92% | 49   | 54.47679 | Ref | -0.66 | -0.2  | -0.28 | -0.18  | -0.22 | -0.53 | -0.17 | 10600 | 6160  | 9150  | 9740  | 11500 | 9780  | 8230  | 10500 | 767.1 | 2298.2 | 3 | 0.0198 | 8.626 |

|                                                                                  |                        |                                   |     |      |          |     |       |       |       |        |       |       |       |       |       |       |        |        |       |       |        |       |        |   |        |       |
|----------------------------------------------------------------------------------|------------------------|-----------------------------------|-----|------|----------|-----|-------|-------|-------|--------|-------|-------|-------|-------|-------|-------|--------|--------|-------|-------|--------|-------|--------|---|--------|-------|
| Uncharacterized protein (Fragment)<br>OS=Bos taurus PE=4<br>SV=1                 | tr F1MCK2 F1MCK2_BOVIN | vDIE<br>GPD<br>VHLE<br>GPE<br>Gk  | 95% | 53.5 | 54.48454 | Ref | -0.5  | -0.44 | -0.39 | -0.059 | -0.15 | -0.49 | -0.34 | 16500 | 9880  | 11200 | 13000  | 18000  | 14700 | 12100 | 13400  | 767.1 | 2298.2 | 3 | 0.014  | 6.069 |
| Uncharacterized protein (Fragment)<br>OS=Bos taurus PE=4<br>SV=1                 | tr F1MCK2 F1MCK2_BOVIN | vkGE<br>VDV<br>SLPN<br>VEG<br>DLk | 67% | 32.8 | 52.25149 | Ref | -0.31 | -0.34 | -0.41 | -0.24  | -0.25 | -0.16 | -0.24 | 5150  | 4440  | 4720  | 5040   | 6230   | 5420  | 6010  | 5670   | 678.4 | 2709.6 | 4 | 0.0123 | 4.551 |
| Uncharacterized protein (Fragment)<br>OS=Equus caballus<br>GN=AHNAK PE=4<br>SV=1 | tr F7AJD4 F7AJD4_HORSE | aDID<br>ISGP<br>k                 | 89% | 41.2 | 51.56422 | Ref | -0.46 | -0.24 | -0.33 | -0.2   | -0.01 | -0.43 | -0.24 | 18600 | 12000 | 15200 | 16000  | 19300  | 19200 | 15000 | 17000  | 762.4 | 1522.9 | 2 | 0.0102 | 6.706 |
| Uncharacterized protein (Fragment)<br>OS=Equus caballus<br>GN=AHNAK PE=4<br>SV=1 | tr F7AJD4 F7AJD4_HORSE | aDID<br>VSG<br>Pk                 | 93% | 44.2 | 51.98503 | Ref | -0.65 | -0.33 | -0.16 | 0.039  | -0    | -0.77 | -0.32 | 2E+05 | 82600 | 1E+05 | 141000 | 178000 | 2E+05 | 92800 | 126000 | 755.4 | 1508.9 | 2 | 0.0151 | 10.01 |
| Uncharacterized protein (Fragment)<br>OS=Equus caballus<br>GN=AHNAK PE=4<br>SV=1 | tr F7AJD4 F7AJD4_HORSE | gPQ<br>VTG<br>Elk                 | 72% | 34.4 | 51.25227 | Ref | -0.55 | 0.037 | -0.38 | -0.25  | -0.09 | -0.56 | -0.25 | 27100 | 15600 | 25400 | 21400  | 25800  | 25200 | 18900 | 23200  | 769   | 1535.9 | 2 | 0.0237 | 15.39 |

|                                                                                  |                               |                                        |     |      |          |     |       |       |       |        |       |       |       |       |       |       |       |       |       |       |       |       |        |   |        |       |
|----------------------------------------------------------------------------------|-------------------------------|----------------------------------------|-----|------|----------|-----|-------|-------|-------|--------|-------|-------|-------|-------|-------|-------|-------|-------|-------|-------|-------|-------|--------|---|--------|-------|
| Uncharacterized protein (Fragment)<br>OS=Equus caballus<br>GN=AHNAK PE=4<br>SV=1 | tr F7AJD4_1 F7AJD4_1<br>HORSE | iSLP<br>DVD<br>LHLk                    | 59% | 31.4 | 50.88667 | Ref | -0.34 | -0.33 | -0.44 | -0.21  | 0.002 | -0.23 | -0.22 | 1920  | 1460  | 1600  | 1660  | 2140  | 2170  | 1930  | 1930  | 929.6 | 1857.1 | 2 | 0.0138 | 7.414 |
| Uncharacterized protein (Fragment)<br>OS=Equus caballus<br>GN=AHNAK PE=4<br>SV=1 | tr F7AJD4_2 F7AJD4_2<br>HORSE | iSLP<br>DVD<br>LHLk                    | 82% | 38   | 50.88717 | Ref | -0.37 | -0.34 | -0.25 | -0.24  | -0.12 | -0.39 | -0.17 | 2260  | 1560  | 1730  | 2070  | 2290  | 2180  | 1890  | 2180  | 620   | 1857.1 | 3 | 0.0126 | 6.766 |
| Uncharacterized protein (Fragment)<br>OS=Equus caballus<br>GN=AHNAK PE=4<br>SV=1 | tr F7AJD4_3 F7AJD4_3<br>HORSE | iSMP<br>DIDL<br>NLkG<br>Pk             | 66% | 31.4 | 50.98433 | Ref | -0.81 | -0.37 | -0.16 | 0.069  | -0    | -0.43 | -0.16 | 13800 | 7750  | 11400 | 14800 | 19100 | 15900 | 12300 | 14800 | 614.1 | 2452.4 | 4 | 0.0072 | 2.934 |
| Uncharacterized protein (Fragment)<br>OS=Equus caballus<br>GN=AHNAK PE=4<br>SV=1 | tr F7AJD4_4 F7AJD4_4<br>HORSE | iSMP<br>DIDL<br>nLkG<br>Pk             | 55% | 30.5 | 52.07734 | Ref | -0.53 | -0.47 | -0.36 | -0.068 | 0.12  | -0.27 | -0.13 | 3520  | 2540  | 2870  | 3490  | 4700  | 4670  | 3740  | 4090  | 614.4 | 2453.4 | 4 | 0.0167 | 6.816 |
| Uncharacterized protein (Fragment)<br>OS=Equus caballus<br>GN=AHNAK PE=4<br>SV=1 | tr F7AJD4_5 F7AJD4_5<br>HORSE | vDID<br>APD<br>VDV<br>HGP<br>DWH<br>Lk | 93% | 47.8 | 55.18826 | Ref | -0.43 | -0.48 | -0.33 | -0.084 | -0.04 | -0.44 | -0.51 | 29300 | 15800 | 16500 | 20500 | 26800 | 24100 | 19100 | 18100 | 659.8 | 2635.4 | 4 | 0.0233 | 8.846 |

|                                                                                  |                                |                                  |     |      |          |     |       |       |       |       |       |       |       |       |       |       |       |       |       |       |       |       |        |   |        |       |
|----------------------------------------------------------------------------------|--------------------------------|----------------------------------|-----|------|----------|-----|-------|-------|-------|-------|-------|-------|-------|-------|-------|-------|-------|-------|-------|-------|-------|-------|--------|---|--------|-------|
| Uncharacterized protein (Fragment)<br>OS=Equus caballus<br>GN=AHNAK PE=4<br>SV=1 | tr F7AJD4<br> F7AJD4_<br>HORSE | vDID<br>APD<br>VNIE<br>GPE<br>Gk | 95% | 88.6 | 54.56036 | Ref | -0.48 | -0.08 | -0.85 | 0.009 | 0.17  | -0.41 | -0.76 | 3000  | 1670  | 2410  | 1590  | 3160  | 3090  | 2150  | 1680  | 1139  | 2275.2 | 2 | 0.0163 | 7.173 |
| Uncharacterized protein (Fragment)<br>OS=Equus caballus<br>GN=AHNAK PE=4<br>SV=1 | tr F7AJD4<br> F7AJD4_<br>HORSE | vDID<br>APD<br>VNIE<br>GPE<br>Gk | 94% | 51.6 | 54.60773 | Ref | -0.31 | -0.28 | -0.41 | -0.15 | -0.11 | -0.27 | -0.42 | 26300 | 18100 | 20000 | 20500 | 27100 | 24400 | 22700 | 20300 | 759.4 | 2275.2 | 3 | 0.0134 | 5.871 |
| Uncharacterized protein (Fragment)<br>OS=Equus caballus<br>GN=AHNAK PE=4<br>SV=1 | tr F7AJD4<br> F7AJD4_<br>HORSE | vDID<br>VPD<br>VNIE<br>GPD<br>Ak | 70% | 37.7 | 54.54792 | Ref | -0.3  | -0.23 | -0.08 | -0.21 | -0.01 | -0.64 | -0.12 | 7560  | 6810  | 7750  | 9640  | 9690  | 9730  | 6600  | 9330  | 768.8 | 2303.2 | 3 | 0.0111 | 4.836 |
| Uncharacterized protein (Fragment)<br>OS=Equus caballus<br>GN=AHNAK PE=4<br>SV=1 | tr F7AJD4<br> F7AJD4_<br>HORSE | vDVE<br>VPD<br>VNIE<br>GPn<br>Ak | 86% | 43.7 | 54.59988 | Ref | -0.59 | -0.31 | -0.37 | -0.18 | -0.1  | -0.32 | -0.18 | 10000 | 5420  | 7160  | 7680  | 9700  | 8970  | 8010  | 8790  | 768.8 | 2303.2 | 3 | 0.017  | 7.36  |
| Uncharacterized protein (Fragment)<br>OS=Equus caballus<br>GN=AHNAK PE=4<br>SV=1 | tr F7AJD4<br> F7AJD4_<br>HORSE | vDVE<br>VPD<br>VNIE<br>GPn<br>Ak | 90% | 47.1 | 54.58472 | Ref | -0.39 | -0.38 | -0.18 | -0.3  | 0.17  | -0.53 | -0.22 | 9690  | 7030  | 7680  | 9960  | 10100 | 12200 | 7810  | 9620  | 768.8 | 2303.2 | 3 | 0.0151 | 6.566 |

|                                                                                  |                                                                                                                                                                                                                         |                     |     |      |          |     |       |       |       |       |       |       |       |       |       |       |       |       |       |       |       |       |        |   |        |       |
|----------------------------------------------------------------------------------|-------------------------------------------------------------------------------------------------------------------------------------------------------------------------------------------------------------------------|---------------------|-----|------|----------|-----|-------|-------|-------|-------|-------|-------|-------|-------|-------|-------|-------|-------|-------|-------|-------|-------|--------|---|--------|-------|
| Uncharacterized protein (Fragment)<br>OS=Equus caballus<br>GN=AHNAK PE=4<br>SV=1 | tr F7AJD4 F7AJD4_HORSE                                                                                                                                                                                                  | vTAP<br>DIDL<br>HLk | 57% | 30.7 | 52.07333 | Ref | -0.42 | -0.23 | -0.18 | -0.16 | -0.11 | -0.51 | -0.37 | 15600 | 9820  | 12200 | 14200 | 15800 | 14300 | 11300 | 12400 | 458.3 | 1829.1 | 4 | 0.0183 | 9.999 |
| 40S ribosomal protein S18<br>OS=Capra hircus<br>GN=RPS18 PE=2<br>SV=1            | 6 RS18_CAPHI,sp P62269 RS18_HUMAN,sp P62270 RS18_MOUSE,sp P62271 RS18_RAT,sp P62272 RS18_PIG,sp Q3TOR1 RS18_BOVIN,sp Q5TJE9 RS18_CANFA,tr D3ZM33 D3ZM33_RAT,tr F2X217 F2X217_AILME,tr F5H8M6 F5H8M6_MOUSE,tr F6TQC9 F6T | aGEL<br>TEDE<br>VER | 95% | 46   | 50.62586 | Ref | 0.3   | -0.04 | 0.35  | -0.14 | 0.31  | -0.13 | 0.37  | 40600 | 40500 | 34800 | 51300 | 40000 | 48000 | 36800 | 51800 | 776.4 | 1550.8 | 2 | 0.0117 | 7.538 |

|                                                                       |                                                                                                                                                                                                                                                                                                                                 |               |     |      |          |     |      |       |      |        |      |       |      |       |       |       |       |       |       |       |       |       |      |   |       |       |
|-----------------------------------------------------------------------|---------------------------------------------------------------------------------------------------------------------------------------------------------------------------------------------------------------------------------------------------------------------------------------------------------------------------------|---------------|-----|------|----------|-----|------|-------|------|--------|------|-------|------|-------|-------|-------|-------|-------|-------|-------|-------|-------|------|---|-------|-------|
| 40S ribosomal protein S18<br>OS=Capra hircus<br>GN=RPS18 PE=2<br>SV=1 | 6 RS18_C<br>APHI,sp P<br>62269 RS<br>18_HUMA<br>N,sp P62<br>270 RS18<br>_MOUSE,<br>sp P6227<br>1 RS18_R<br>AT,sp P62<br>272 RS18<br>_PIG,sp Q<br>3TOR1 RS<br>18_BOVIN<br>,sp Q5TJE<br>9 RS18_C<br>ANFA,tr <br>D3ZM33 <br>D3ZM33_<br>RAT,tr F2<br>X217 F2X<br>217_AILM<br>E,tr F5H8<br>M6 F5H8<br>M6_MOU<br>SE,tr F6T<br>QC9 F6T | iAFAI<br>TAlk | 73% | 29.3 | 45.19303 | Ref | 0.28 | 0.16  | 0.24 | 0.013  | 0.22 | -0.13 | 0.17 | 5060  | 4490  | 4480  | 5340  | 5020  | 5060  | 4140  | 5050  | 519.3 | 1555 | 3 | 0.003 | 1.908 |
| 40S ribosomal protein S18<br>OS=Capra hircus<br>GN=RPS18 PE=2<br>SV=1 | 6 RS18_C<br>APHI,sp P<br>62269 RS<br>18_HUMA<br>N,sp P62<br>270 RS18<br>_MOUSE,<br>sp P6227<br>1 RS18_R<br>AT,sp P62<br>272 RS18<br>_PIG,sp Q<br>3TOR1 RS<br>18_BOVIN<br>,sp Q5TJE<br>9 RS18_C<br>ANFA,tr <br>D3ZM33 <br>D3ZM33_<br>RAT,tr F2<br>X217 F2X<br>217_AILM<br>E,tr F5H8<br>M6 F5H8<br>M6_MOU<br>SE,tr F6T<br>QC9 F6T | iAFAI<br>TAlk | 70% | 29.3 | 45.97136 | Ref | 0.22 | -0.06 | 0.38 | -0.031 | 0.22 | -0.11 | 0.39 | 16500 | 15300 | 13700 | 20800 | 17200 | 17800 | 14800 | 20900 | 519.3 | 1555 | 3 | 0.011 | 7.095 |



|                                                                       |                                                                                                                                                                                                                                                                                                                                 |                    |     |      |          |     |      |       |      |       |      |       |      |      |      |      |      |      |      |      |      |       |        |   |        |       |
|-----------------------------------------------------------------------|---------------------------------------------------------------------------------------------------------------------------------------------------------------------------------------------------------------------------------------------------------------------------------------------------------------------------------|--------------------|-----|------|----------|-----|------|-------|------|-------|------|-------|------|------|------|------|------|------|------|------|------|-------|--------|---|--------|-------|
| 40S ribosomal protein S18<br>OS=Capra hircus<br>GN=RPS18 PE=2<br>SV=1 | 6 RS18_C<br>APHI,sp P<br>62269 RS<br>18_HUMA<br>N,sp P62<br>270 RS18<br>_MOUSE,<br>sp P6227<br>1 RS18_R<br>AT,sp P62<br>272 RS18<br>_PIG,sp Q<br>3TOR1 RS<br>18_BOVIN<br>,sp Q5TJE<br>9 RS18_C<br>ANFA,tr <br>D3ZM33 <br>D3ZM33_<br>RAT,tr F2<br>X217 F2X<br>217_AILM<br>E,tr F5H8<br>M6 F5H8<br>M6_MOU<br>SE,tr F6T<br>QC9 F6T | kiAF<br>AITA<br>Ik | 95% | 51.1 | 44.27372 | Ref | 0.11 | -0.05 | 0.45 | 0.076 | 0.35 | -0.02 | 0.3  | 2670 | 2620 | 2550 | 4050 | 3450 | 3650 | 2940 | 3650 | 663.4 | 1987.3 | 3 | 0.0322 | 16.2  |
| 40S ribosomal protein S18<br>OS=Capra hircus<br>GN=RPS18 PE=2<br>SV=1 | 6 RS18_C<br>APHI,sp P<br>62269 RS<br>18_HUMA<br>N,sp P62<br>270 RS18<br>_MOUSE,<br>sp P6227<br>1 RS18_R<br>AT,sp P62<br>272 RS18<br>_PIG,sp Q<br>3TOR1 RS<br>18_BOVIN<br>,sp Q5TJE<br>9 RS18_C<br>ANFA,tr <br>D3ZM33 <br>D3ZM33_<br>RAT,tr F2<br>X217 F2X<br>217_AILM<br>E,tr F5H8<br>M6 F5H8<br>M6_MOU<br>SE,tr F6T<br>QC9 F6T | kiAF<br>AITA<br>Ik | 89% | 30.1 | 41.00922 | Ref | 0.11 | 0.025 | 0.43 | 0.054 | 0.37 | -0.04 | 0.29 | 1710 | 1720 | 1760 | 2610 | 2220 | 2420 | 1890 | 2370 | 497.8 | 1987.3 | 4 | 0.0038 | 1.911 |

|                                                                       |                                                                                                                                                                                                                                                                                                                                 |                    |     |      |          |     |      |       |      |       |      |       |      |      |      |      |      |      |      |      |      |       |        |   |        |       |
|-----------------------------------------------------------------------|---------------------------------------------------------------------------------------------------------------------------------------------------------------------------------------------------------------------------------------------------------------------------------------------------------------------------------|--------------------|-----|------|----------|-----|------|-------|------|-------|------|-------|------|------|------|------|------|------|------|------|------|-------|--------|---|--------|-------|
| 40S ribosomal protein S18<br>OS=Capra hircus<br>GN=RPS18 PE=2<br>SV=1 | 6 RS18_C<br>APHI,sp P<br>62269 RS<br>18_HUMA<br>N,sp P62<br>270 RS18<br>_MOUSE,<br>sp P6227<br>1 RS18_R<br>AT,sp P62<br>272 RS18<br>_PIG,sp Q<br>3TOR1 RS<br>18_BOVIN<br>,sp Q5TJE<br>9 RS18_C<br>ANFA,tr <br>D3ZM33 <br>D3ZM33_<br>RAT,tr F2<br>X217 F2X<br>217_AILM<br>E,tr F5H8<br>M6 F5H8<br>M6_MOU<br>SE,tr F6T<br>QC9 F6T | kiAF<br>AITA<br>ik | 78% | 23.6 | 40.10682 | Ref | 0.13 | -0.07 | 0.37 | 0.049 | 0.31 | 0.006 | 0.38 | 1890 | 1810 | 1710 | 2600 | 2300 | 2400 | 2030 | 2610 | 497.8 | 1987.3 | 4 | 0.0017 | 0.865 |
| 40S ribosomal protein S18<br>OS=Capra hircus<br>GN=RPS18 PE=2<br>SV=1 | 6 RS18_C<br>APHI,sp P<br>62269 RS<br>18_HUMA<br>N,sp P62<br>270 RS18<br>_MOUSE,<br>sp P6227<br>1 RS18_R<br>AT,sp P62<br>272 RS18<br>_PIG,sp Q<br>3TOR1 RS<br>18_BOVIN<br>,sp Q5TJE<br>9 RS18_C<br>ANFA,tr <br>D3ZM33 <br>D3ZM33_<br>RAT,tr F2<br>X217 F2X<br>217_AILM<br>E,tr F5H8<br>M6 F5H8<br>M6_MOU<br>SE,tr F6T<br>QC9 F6T | kiAF<br>AITA<br>ik | 94% | 40.6 | 44.07442 | Ref | 0.24 | -0.18 | 0.4  | 0.08  | 0.27 | 0.021 | 0.32 | 4000 | 4100 | 3340 | 5600 | 4940 | 4930 | 4320 | 5270 | 663.4 | 1987.3 | 3 | 0.0307 | 15.46 |

|                                                                       |                                                                                                                                                                                                                                                                                                                                 |                    |     |      |          |     |        |       |      |      |      |       |      |      |      |      |       |       |       |      |       |       |        |   |        |       |
|-----------------------------------------------------------------------|---------------------------------------------------------------------------------------------------------------------------------------------------------------------------------------------------------------------------------------------------------------------------------------------------------------------------------|--------------------|-----|------|----------|-----|--------|-------|------|------|------|-------|------|------|------|------|-------|-------|-------|------|-------|-------|--------|---|--------|-------|
| 40S ribosomal protein S18<br>OS=Capra hircus<br>GN=RPS18 PE=2<br>SV=1 | 6 RS18_C<br>APHI,sp P<br>62269 RS<br>18_HUMA<br>N,sp P62<br>270 RS18<br>_MOUSE,<br>sp P6227<br>1 RS18_R<br>AT,sp P62<br>272 RS18<br>_PIG,sp Q<br>3TOR1 RS<br>18_BOVIN<br>,sp Q5TJE<br>9 RS18_C<br>ANFA,tr <br>D3ZM33 <br>D3ZM33_<br>RAT,tr F2<br>X217 F2X<br>217_AILM<br>E,tr F5H8<br>M6 F5H8<br>M6_MOU<br>SE,tr F6T<br>QC9 F6T | klAF<br>AITA<br>Ik | 87% | 30   | 42.49321 | Ref | -0.063 | -0    | 0.47 | 0.1  | 0.34 | -0.13 | 0.39 | 9550 | 7960 | 9000 | 14000 | 12000 | 12300 | 9280 | 13200 | 497.8 | 1987.3 | 4 | 0.019  | 9.576 |
| 40S ribosomal protein S18<br>OS=Capra hircus<br>GN=RPS18 PE=2<br>SV=1 | 6 RS18_C<br>APHI,sp P<br>62269 RS<br>18_HUMA<br>N,sp P62<br>270 RS18<br>_MOUSE,<br>sp P6227<br>1 RS18_R<br>AT,sp P62<br>272 RS18<br>_PIG,sp Q<br>3TOR1 RS<br>18_BOVIN<br>,sp Q5TJE<br>9 RS18_C<br>ANFA,tr <br>D3ZM33 <br>D3ZM33_<br>RAT,tr F2<br>X217 F2X<br>217_AILM<br>E,tr F5H8<br>M6 F5H8<br>M6_MOU<br>SE,tr F6T<br>QC9 F6T | klAF<br>AITA<br>Ik | 95% | 39.9 | 41.00543 | Ref | 0.13   | 0.012 | 0.35 | 0.11 | 0.29 | 0.076 | 0.22 | 3800 | 3630 | 3620 | 5160  | 4790  | 4760  | 4270 | 4700  | 663.4 | 1987.3 | 3 | 0.0025 | 1.28  |

|                                                                       |                                                                                                                                                                                                                                                                                                                                 |                    |     |      |          |     |        |      |       |       |       |       |      |      |      |      |      |      |      |      |      |       |        |   |        |       |
|-----------------------------------------------------------------------|---------------------------------------------------------------------------------------------------------------------------------------------------------------------------------------------------------------------------------------------------------------------------------------------------------------------------------|--------------------|-----|------|----------|-----|--------|------|-------|-------|-------|-------|------|------|------|------|------|------|------|------|------|-------|--------|---|--------|-------|
| 40S ribosomal protein S18<br>OS=Capra hircus<br>GN=RPS18 PE=2<br>SV=1 | 6 RS18_C<br>APHI,sp P<br>62269 RS<br>18_HUMA<br>N,sp P62<br>270 RS18<br>_MOUSE,<br>sp P6227<br>1 RS18_R<br>AT,sp P62<br>272 RS18<br>_PIG,sp Q<br>3TOR1 RS<br>18_BOVIN<br>,sp Q5TJE<br>9 RS18_C<br>ANFA,tr <br>D3ZM33 <br>D3ZM33_<br>RAT,tr F2<br>X217 F2X<br>217_AILM<br>E,tr F5H8<br>M6 F5H8<br>M6_MOU<br>SE,tr F6T<br>QC9 F6T | klAF<br>AITA<br>Ik | 57% | 22.7 | 44.07408 | Ref | -0.008 | 0.37 | -0.12 | 0.17  | 0.13  | 0.028 | 0.34 | 937  | 679  | 956  | 763  | 1030 | 878  | 852  | 1050 | 497.8 | 1987.3 | 4 | 0.0303 | 15.23 |
| 40S ribosomal protein S18<br>OS=Capra hircus<br>GN=RPS18 PE=2<br>SV=1 | 6 RS18_C<br>APHI,sp P<br>62269 RS<br>18_HUMA<br>N,sp P62<br>270 RS18<br>_MOUSE,<br>sp P6227<br>1 RS18_R<br>AT,sp P62<br>272 RS18<br>_PIG,sp Q<br>3TOR1 RS<br>18_BOVIN<br>,sp Q5TJE<br>9 RS18_C<br>ANFA,tr <br>D3ZM33 <br>D3ZM33_<br>RAT,tr F2<br>X217 F2X<br>217_AILM<br>E,tr F5H8<br>M6 F5H8<br>M6_MOU<br>SE,tr F6T<br>QC9 F6T | sLVIP<br>Ek        | 69% | 31.7 | 49.30164 | Ref | -0.13  | 0.16 | 0.12  | -0.15 | 0.002 | 0.24  | 0.84 | 1570 | 1350 | 1800 | 1960 | 1790 | 1740 | 2140 | 3210 | 566.3 | 1130.7 | 2 | 0.0152 | 13.46 |

|                                                                       |                                                                                                                                                                                                                                                                                                                                |                   |     |      |          |     |      |       |      |        |      |       |      |       |        |       |        |        |       |       |        |       |        |   |        |       |
|-----------------------------------------------------------------------|--------------------------------------------------------------------------------------------------------------------------------------------------------------------------------------------------------------------------------------------------------------------------------------------------------------------------------|-------------------|-----|------|----------|-----|------|-------|------|--------|------|-------|------|-------|--------|-------|--------|--------|-------|-------|--------|-------|--------|---|--------|-------|
| 40S ribosomal protein S18<br>OS=Capra hircus<br>GN=RPS18 PE=2<br>SV=1 | 6 RS18_C<br>API,sp P<br>62269 RS<br>18_HUMA<br>N,sp P62<br>270 RS18<br>_MOUSE,<br>sp P6227<br>1 RS18_R<br>AT,sp P62<br>272 RS18<br>_PIG,sp Q<br>3TOR1 RS<br>18_BOVIN<br>,sp Q5TJE<br>9 RS18_C<br>ANFA,tr <br>D3ZM33 <br>D3ZM33_<br>RAT,tr F2<br>X217 F2X<br>217_AILM<br>E,tr F5H8<br>M6 F5H8<br>M6_MOU<br>SE,tr F6T<br>QC9 F6T | VITI<br>MQ<br>NPR | 53% | 31.5 | 51.79928 | Ref | 0.3  | -0.11 | 0.41 | -0.081 | 0.22 | 0.083 | 0.16 | 1E+05 | 101000 | 81800 | 132000 | 104000 | 1E+05 | 1E+05 | 111000 | 688.4 | 1374.8 | 2 | 0.0101 | 7.344 |
| 40S ribosomal protein S18<br>OS=Capra hircus<br>GN=RPS18 PE=2<br>SV=1 | 6 RS18_C<br>API,sp P<br>62269 RS<br>18_HUMA<br>N,sp P62<br>270 RS18<br>_MOUSE,<br>sp P6227<br>1 RS18_R<br>AT,sp P62<br>272 RS18<br>_PIG,sp Q<br>3TOR1 RS<br>18_BOVIN<br>,sp Q5TJE<br>9 RS18_C<br>ANFA,tr <br>D3ZM33 <br>D3ZM33_<br>RAT,tr F2<br>X217 F2X<br>217_AILM<br>E,tr F5H8<br>M6 F5H8<br>M6_MOU<br>SE,tr F6T<br>QC9 F6T | VITI<br>MQ<br>NPR | 69% | 34.8 | 51.79862 | Ref | 0.39 | -0.07 | 0.14 | -0.014 | 0.22 | -0.01 | 0.2  | 7620  | 7080   | 5580  | 7230   | 7160   | 7380  | 6570  | 7540   | 459.3 | 1374.8 | 3 | 0.0097 | 7.043 |

|                                                                       |                                                                                                                                                                                                                                                                                                                                 |             |     |      |          |     |       |      |      |        |      |       |       |       |       |       |       |       |       |       |       |       |        |   |        |       |
|-----------------------------------------------------------------------|---------------------------------------------------------------------------------------------------------------------------------------------------------------------------------------------------------------------------------------------------------------------------------------------------------------------------------|-------------|-----|------|----------|-----|-------|------|------|--------|------|-------|-------|-------|-------|-------|-------|-------|-------|-------|-------|-------|--------|---|--------|-------|
| 40S ribosomal protein S18<br>OS=Capra hircus<br>GN=RPS18 PE=2<br>SV=1 | 6 RS18_C<br>APHI,sp P<br>62269 RS<br>18_HUMA<br>N,sp P62<br>270 RS18<br>_MOUSE,<br>sp P6227<br>1 RS18_R<br>AT,sp P62<br>272 RS18<br>_PIG,sp Q<br>3TOR1 RS<br>18_BOVIN<br>,sp Q5TJE<br>9 RS18_C<br>ANFA,tr <br>D3ZM33 <br>D3ZM33_<br>RAT,tr F2<br>X217 F2X<br>217_AILM<br>E,tr F5H8<br>M6 F5H8<br>M6_MOU<br>SE,tr F6T<br>QC9 F6T | yAH         | 94% | 48.8 | 51.76982 | Ref | 0.053 | 0.14 | 0.6  | -0.096 | 0.46 | -0.09 | 0.046 | 57700 | 53800 | 61900 | 95500 | 65100 | 83600 | 59700 | 65000 | 387.9 | 1160.7 | 3 | 0.0076 | 6.554 |
| 40S ribosomal protein S18<br>OS=Capra hircus<br>GN=RPS18 PE=2<br>SV=1 | 6 RS18_C<br>APHI,sp P<br>62269 RS<br>18_HUMA<br>N,sp P62<br>270 RS18<br>_MOUSE,<br>sp P6227<br>1 RS18_R<br>AT,sp P62<br>272 RS18<br>_PIG,sp Q<br>3TOR1 RS<br>18_BOVIN<br>,sp Q5TJE<br>9 RS18_C<br>ANFA,tr <br>D3ZM33 <br>D3ZM33_<br>RAT,tr F2<br>X217 F2X<br>217_AILM<br>E,tr F5H8<br>M6 F5H8<br>M6_MOU<br>SE,tr F6T<br>QC9 F6T | yAH<br>VVLR | 81% | 38.3 | 51.74415 | Ref | 0.094 | 0.16 | 0.54 | -0.095 | 0.44 | -0.18 | 0.11  | 5760  | 5350  | 6080  | 8900  | 6300  | 7960  | 5420  | 6580  | 387.9 | 1160.7 | 3 | 0.0052 | 4.514 |

|                                                                                                          |                                                                                                                                                                                                                                                                                                                                                                  |                      |             |            |             |                 |            |              |              |              |              |             |              |              |              |              |              |              |              |              |              |              |              |               |          |               |              |
|----------------------------------------------------------------------------------------------------------|------------------------------------------------------------------------------------------------------------------------------------------------------------------------------------------------------------------------------------------------------------------------------------------------------------------------------------------------------------------|----------------------|-------------|------------|-------------|-----------------|------------|--------------|--------------|--------------|--------------|-------------|--------------|--------------|--------------|--------------|--------------|--------------|--------------|--------------|--------------|--------------|--------------|---------------|----------|---------------|--------------|
| <p>40S ribosomal protein S18<br/>OS=Capra hircus<br/>GN=RPS18 PE=2<br/>SV=1</p>                          | <p>6 RS18_C<br/>APHI,sp P<br/>62269 RS<br/>18_HUMA<br/>N,sp P62<br/>270 RS18<br/>_MOUSE,<br/>sp P6227<br/>1 RS18_R<br/>AT,sp P62<br/>272 RS18<br/>_PIG,sp Q<br/>3TOR1 RS<br/>18_BOVIN<br/>,sp Q5TJE<br/>9 RS18_C<br/>ANFA,tr <br/>D3ZM33 <br/>D3ZM33_<br/>RAT,tr F2<br/>X217 F2X<br/>217_AILM<br/>E,tr F5H8<br/>M6 F5H8<br/>M6_MOU<br/>SE,tr F6T<br/>QC9 F6T</p> | <p>ySQV<br/>LAnG</p> | <p>LDNk</p> | <p>95%</p> | <p>49.1</p> | <p>53.56643</p> | <p>Ref</p> | <p>0.14</p>  | <p>-0.03</p> | <p>0.45</p>  | <p>0.014</p> | <p>0.37</p> | <p>-0.14</p> | <p>0.3</p>   | <p>17900</p> | <p>16700</p> | <p>16200</p> | <p>25200</p> | <p>20600</p> | <p>23000</p> | <p>16900</p> | <p>22700</p> | <p>966</p>   | <p>1930.1</p> | <p>2</p> | <p>0.009</p>  | <p>4.67</p>  |
| <p>Ubiquitin-60S<br/>ribosomal protein<br/>L40 OS=Macaca<br/>fascicularis<br/>GN=UBA52 PE=2<br/>SV=2</p> | <p>3 RL40_<br/>MACFA,sp<br/> POC275 <br/>RL40_PO<br/>NPY,sp P<br/>0C276 RL<br/>40_SHEEP<br/>,sp POCG<br/>47 UBB_<br/>HUMAN,s<br/>p POCG48<br/> UBC_HU<br/>MAN,sp P<br/>0CG49 U<br/>BB_MOUS<br/>E,sp POC<br/>G50 UBC<br/>_MOUSE,<br/>sp POCG5<br/>1 UBB_R<br/>AT,sp PO<br/>CG53 UB<br/>B_BOVIN,<br/>sp POCG5<br/>4 UBB_C<br/>AVPO,sp <br/>POCG55 </p>             | <p>eSTL<br/>HLVL</p> | <p>R</p>    | <p>95%</p> | <p>52.7</p> | <p>51.67982</p> | <p>Ref</p> | <p>-0.26</p> | <p>-0.07</p> | <p>0.048</p> | <p>-0.25</p> | <p>0.12</p> | <p>-0.53</p> | <p>-0.17</p> | <p>12700</p> | <p>8990</p>  | <p>11100</p> | <p>13500</p> | <p>12100</p> | <p>13600</p> | <p>9110</p>  | <p>11600</p> | <p>457.9</p> | <p>1370.8</p> | <p>3</p> | <p>0.0099</p> | <p>7.186</p> |

|                                                                               |                                                                                                                                                                                                            |          |   |     |      |          |     |       |       |       |       |       |       |       |       |      |       |       |       |       |      |       |       |        |   |        |       |
|-------------------------------------------------------------------------------|------------------------------------------------------------------------------------------------------------------------------------------------------------------------------------------------------------|----------|---|-----|------|----------|-----|-------|-------|-------|-------|-------|-------|-------|-------|------|-------|-------|-------|-------|------|-------|-------|--------|---|--------|-------|
| Ubiquitin-60S ribosomal protein L40 OS=Macaca fascicularis GN=UBA52 PE=2 SV=2 | 3 RL40_MACFA,sp POC275 RL40_PONPY,sp POC276 RL40_SHEEP,sp POCG47 UBB_HUMAN,sp POCG48 UBC_HUMAN,sp POCG49 UBB_MOUSE,sp POCG50 UBC_MOUSE,sp POCG51 UBB_RAT,sp POCG53 UBB_BOVIN,sp POCG54 UBB_CAVPO,sp POCG55 | eSTLHLVL | R | 95% | 55.5 | 51.60496 | Ref | -0.47 | -0.15 | 0.064 | -0.11 | 0.086 | -0.56 | -0.13 | 12500 | 7050 | 9560  | 12400 | 12100 | 12100 | 8110 | 10900 | 457.9 | 1370.8 | 3 | 0.0122 | 8.913 |
| Ubiquitin-60S ribosomal protein L40 OS=Macaca fascicularis GN=UBA52 PE=2 SV=2 | 3 RL40_MACFA,sp POC275 RL40_PONPY,sp POC276 RL40_SHEEP,sp POCG47 UBB_HUMAN,sp POCG48 UBC_HUMAN,sp POCG49 UBB_MOUSE,sp POCG50 UBC_MOUSE,sp POCG51 UBB_RAT,sp POCG53 UBB_BOVIN,sp POCG54 UBB_CAVPO,sp POCG55 | eSTLHLVL | R | 95% | 55.8 | 51.66351 | Ref | -0.33 | 0.12  | 0.11  | -0.35 | 0.033 | -0.41 | -0    | 9970  | 8120 | 12000 | 13400 | 10800 | 12200 | 9370 | 12400 | 457.9 | 1370.8 | 3 | 0.0094 | 6.836 |



|                                                                               |                                                                                                                                                                                                                                      |             |     |      |          |     |       |       |       |       |       |       |       |       |       |       |       |       |       |       |       |       |        |   |        |       |
|-------------------------------------------------------------------------------|--------------------------------------------------------------------------------------------------------------------------------------------------------------------------------------------------------------------------------------|-------------|-----|------|----------|-----|-------|-------|-------|-------|-------|-------|-------|-------|-------|-------|-------|-------|-------|-------|-------|-------|--------|---|--------|-------|
| Ubiquitin-60S ribosomal protein L40 OS=Macaca fascicularis GN=UBA52 PE=2 SV=2 | 3 RL40_ MACFA,sp  POC275  RL40_PO NPY,sp P OC276 RL 40_SHEEP ,sp POCG 47 UBB_ HUMAN,s p POCG48  UBC_HU MAN,sp P OCG49 U BB_MOUS E,sp POC G50 UBC _MOUSE, sp POCG5 1 UBB_R AT,sp PO CG53 UB B_BOVIN, sp POCG5 4 UBB_C AVPO,sp  POCG55 | eSTL HLVL R | 93% | 46.7 | 51.67982 | Ref | -0.25 | 0.042 | -0.02 | -0.4  | -0.02 | -0.54 | -0.05 | 8000  | 5290  | 7020  | 7570  | 6380  | 7270  | 5280  | 7400  | 457.9 | 1370.8 | 3 | 0.0099 | 7.251 |
| Ubiquitin-60S ribosomal protein L40 OS=Macaca fascicularis GN=UBA52 PE=2 SV=2 | 3 RL40_ MACFA,sp  POC275  RL40_PO NPY,sp P OC276 RL 40_SHEEP ,sp POCG 47 UBB_ HUMAN,s p POCG48  UBC_HU MAN,sp P OCG49 U BB_MOUS E,sp POC G50 UBC _MOUSE, sp POCG5 1 UBB_R AT,sp PO CG53 UB B_BOVIN, sp POCG5 4 UBB_C AVPO,sp  POCG55 | eSTL HLVL R | 95% | 52.8 | 51.70704 | Ref | -0.28 | 0.022 | 0.037 | -0.29 | -0.02 | -0.12 | -0.12 | 16000 | 13400 | 17800 | 20200 | 17800 | 18700 | 18300 | 18000 | 457.9 | 1370.8 | 3 | 0.0087 | 6.377 |

|                                                                               |                                                                                                                                                                                                                                      |            |     |      |          |     |        |       |       |       |       |       |       |      |      |      |      |      |      |      |       |       |        |   |        |       |
|-------------------------------------------------------------------------------|--------------------------------------------------------------------------------------------------------------------------------------------------------------------------------------------------------------------------------------|------------|-----|------|----------|-----|--------|-------|-------|-------|-------|-------|-------|------|------|------|------|------|------|------|-------|-------|--------|---|--------|-------|
| Ubiquitin-60S ribosomal protein L40 OS=Macaca fascicularis GN=UBA52 PE=2 SV=2 | 3 RL40_ MACFA,sp  POC275  RL40_PO NPY,sp P OC276 RL 40_SHEEP ,sp POCG 47 UBB_ HUMAN,s p POCG48  UBC_HU MAN,sp P OCG49 U BB_MOUS E,sp POC G50 UBC _MOUSE, sp POCG5 1 UBB_R AT,sp PO CG53 UB B_BOVIN, sp POCG5 4 UBB_C AVPO,sp  POCG55 | eSTL HLVLR | 88% | 42.4 | 51.67979 | Ref | -0.27  | -0.08 | -0.02 | -0.22 | -0.03 | -0.49 | 0.14  | 8530 | 6410 | 7940 | 9270 | 8920 | 8850 | 6720 | 10300 | 457.9 | 1370.8 | 3 | 0.0096 | 6.967 |
| Ubiquitin-60S ribosomal protein L40 OS=Macaca fascicularis GN=UBA52 PE=2 SV=2 | 3 RL40_ MACFA,sp  POC275  RL40_PO NPY,sp P OC276 RL 40_SHEEP ,sp POCG 47 UBB_ HUMAN,s p POCG48  UBC_HU MAN,sp P OCG49 U BB_MOUS E,sp POC G50 UBC _MOUSE, sp POCG5 1 UBB_R AT,sp PO CG53 UB B_BOVIN, sp POCG5 4 UBB_C AVPO,sp  POCG55 | eSTL HLVLR | 62% | 33   | 51.53949 | Ref | -0.063 | -0.03 | -0.2  | -0.32 | 0.14  | -0.38 | -0.16 | 1130 | 947  | 1050 | 1050 | 1060 | 1270 | 933  | 1070  | 457.9 | 1370.8 | 3 | 0.0055 | 4.037 |

|                                                                               |                                                                                                                                                                                                                                      |                     |     |      |          |     |        |      |      |       |       |       |       |       |       |       |       |       |       |       |       |       |        |   |        |       |
|-------------------------------------------------------------------------------|--------------------------------------------------------------------------------------------------------------------------------------------------------------------------------------------------------------------------------------|---------------------|-----|------|----------|-----|--------|------|------|-------|-------|-------|-------|-------|-------|-------|-------|-------|-------|-------|-------|-------|--------|---|--------|-------|
| Ubiquitin-60S ribosomal protein L40 OS=Macaca fascicularis GN=UBA52 PE=2 SV=2 | 3 RL40_ MACFA,sp  POC275  RL40_PO NPY,sp P OC276 RL 40_SHEEP ,sp POCG 47 UBB_ HUMAN,s p POCG48  UBC_HU MAN,sp P OCG49 U BB_MOUS E,sp POC G50 UBC _MOUSE, sp POCG5 1 UBB_R AT,sp PO CG53 UB B_BOVIN, sp POCG5 4 UBB_C AVPO,sp  POCG55 | eSTL HLVL           | 81% | 38.4 | 51.70704 | Ref | -0.052 | 0.16 | -0.2 | -0.29 | -0.14 | -0.39 | 0.018 | 613   | 563   | 708   | 618   | 639   | 621   | 547   | 718   | 457.9 | 1370.8 | 3 | 0.0087 | 6.377 |
| Ubiquitin-60S ribosomal protein L40 OS=Macaca fascicularis GN=UBA52 PE=2 SV=2 | 3 RL40_ MACFA,sp  POC275  RL40_PO NPY,sp P OC276 RL 40_SHEEP ,sp POCG 47 UBB_ HUMAN,s p POCG48  UBC_HU MAN,sp P OCG49 U BB_MOUS E,sp POC G50 UBC _MOUSE, sp POCG5 1 UBB_R AT,sp PO CG53 UB B_BOVIN, sp POCG5 4 UBB_C AVPO,sp  POCG55 | TITLE VEPS DTIE NVK | 85% | 43   | 54.54953 | Ref | -0.43  | -0.5 | -0.5 | 0.2   | 0.55  | -0.35 | -0.08 | 33400 | 24700 | 25600 | 28700 | 51200 | 57000 | 32000 | 38200 | 799.4 | 2395.3 | 3 | 0.0228 | 9.519 |

|                                                                               |                                                                                                                                                                                                             |                              |     |      |          |     |       |       |       |        |      |       |      |       |       |       |       |       |       |       |       |       |        |   |        |       |
|-------------------------------------------------------------------------------|-------------------------------------------------------------------------------------------------------------------------------------------------------------------------------------------------------------|------------------------------|-----|------|----------|-----|-------|-------|-------|--------|------|-------|------|-------|-------|-------|-------|-------|-------|-------|-------|-------|--------|---|--------|-------|
| Ubiquitin-60S ribosomal protein L40 OS=Macaca fascicularis GN=UBA52 PE=2 SV=2 | 3 RL40_MACFA,sp POC275 RL40_PO NPY,sp POC276 RL40_SHEEP,sp POCG47 UBB_HUMAN,sp POCG48 UBC_HUMAN,sp POCG49 UBB_MOUSE,sp POCG50 UBC_MOUSE,sp POCG51 UBB_RAT,sp POCG53 UBB_BOVIN,sp POCG54 UBB_CAVPO,sp POCG55 | TITLE<br>VEPS<br>DTIE<br>NVK | 95% | 56.6 | 54.49151 | Ref | -0.79 | -0.36 | -0.16 | -0.24  | 0.21 | -0.46 | 0.35 | 4240  | 1920  | 2800  | 3630  | 3760  | 4500  | 2950  | 5130  | 1199  | 2395.3 | 2 | 0.0178 | 7.426 |
| Ubiquitin-60S ribosomal protein L40 OS=Macaca fascicularis GN=UBA52 PE=2 SV=2 | 3 RL40_MACFA,sp POC275 RL40_PO NPY,sp POC276 RL40_SHEEP,sp POCG47 UBB_HUMAN,sp POCG48 UBC_HUMAN,sp POCG49 UBB_MOUSE,sp POCG50 UBC_MOUSE,sp POCG51 UBB_RAT,sp POCG53 UBB_BOVIN,sp POCG54 UBB_CAVPO,sp POCG55 | TITLE<br>VEPS<br>DTIE<br>NVK | 85% | 43.2 | 54.41326 | Ref | -0.3  | -0.21 | -0.34 | -0.048 | 0.34 | -0.72 | 0.28 | 16400 | 13900 | 16000 | 16500 | 22200 | 25400 | 12700 | 25200 | 799.4 | 2395.3 | 3 | 0.0146 | 6.089 |

|                                                                               |                                                                                                                                                                                                                                      |                     |     |      |          |     |       |       |       |        |       |       |       |      |      |      |      |      |      |      |      |       |        |   |        |       |
|-------------------------------------------------------------------------------|--------------------------------------------------------------------------------------------------------------------------------------------------------------------------------------------------------------------------------------|---------------------|-----|------|----------|-----|-------|-------|-------|--------|-------|-------|-------|------|------|------|------|------|------|------|------|-------|--------|---|--------|-------|
| Ubiquitin-60S ribosomal protein L40 OS=Macaca fascicularis GN=UBA52 PE=2 SV=2 | 3 RL40_ MACFA,sp  POC275  RL40_PO NPY,sp P OC276 RL 40_SHEEP ,sp POCG 47 UBB_ HUMAN,s p POCG48  UBC_HU MAN,sp P OCG49 U BB_MOUS E,sp POC G50 UBC _MOUSE, sp POCG5 1 UBB_R AT,sp PO CG53 UB B_BOVIN, sp POCG5 4 UBB_C AVPO,sp  POCG55 | tITLE VEPS DTIE NVk | 78% | 39.9 | 54.40193 | Ref | -0.33 | -0.15 | -0.28 | 0.025  | 0.17  | -0.23 | -0.31 | 5350 | 3550 | 4370 | 4450 | 6080 | 5860 | 4630 | 4360 | 799.4 | 2395.3 | 3 | 0.0142 | 5.926 |
| Ubiquitin-60S ribosomal protein L40 OS=Macaca fascicularis GN=UBA52 PE=2 SV=2 | 3 RL40_ MACFA,sp  POC275  RL40_PO NPY,sp P OC276 RL 40_SHEEP ,sp POCG 47 UBB_ HUMAN,s p POCG48  UBC_HU MAN,sp P OCG49 U BB_MOUS E,sp POC G50 UBC _MOUSE, sp POCG5 1 UBB_R AT,sp PO CG53 UB B_BOVIN, sp POCG5 4 UBB_C AVPO,sp  POCG55 | tITLE VEPS DTIE NVk | 87% | 42.4 | 54.384   | Ref | -0.59 | -0    | 0.17  | -0.042 | -0.05 | -0.83 | 0.02  | 1020 | 552  | 903  | 1140 | 1090 | 945  | 573  | 1030 | 1199  | 2395.3 | 2 | 0.0137 | 5.698 |

|                                                                                      |                                                                                                                                                                                                                                              |                            |            |             |                 |            |              |              |              |              |             |              |              |              |              |              |              |              |              |              |              |              |               |          |               |              |
|--------------------------------------------------------------------------------------|----------------------------------------------------------------------------------------------------------------------------------------------------------------------------------------------------------------------------------------------|----------------------------|------------|-------------|-----------------|------------|--------------|--------------|--------------|--------------|-------------|--------------|--------------|--------------|--------------|--------------|--------------|--------------|--------------|--------------|--------------|--------------|---------------|----------|---------------|--------------|
| <p>Ubiquitin-60S ribosomal protein L40 OS=Macaca fascicularis GN=UBA52 PE=2 SV=2</p> | <p>3 RL40_ MACFA,sp  POC275  RL40_PO NPY,sp P OC276 RL 40_SHEEP ,sp POCG 47 UBB_ HUMAN,s p POCG48  UBC_HU MAN,sp P OCG49 U BB_MOUS E,sp POC G50 UBC _MOUSE, sp POCG5 1 UBB_R AT,sp PO CG53 UB B_BOVIN, sp POCG5 4 UBB_C AVPO,sp  POCG55 </p> | <p>tITLE VEPS DTIE NVk</p> | <p>86%</p> | <p>43.8</p> | <p>54.44958</p> | <p>Ref</p> | <p>-0.39</p> | <p>-0.21</p> | <p>-0.08</p> | <p>-0.22</p> | <p>0.18</p> | <p>-0.38</p> | <p>0.037</p> | <p>2340</p>  | <p>1540</p>  | <p>1900</p>  | <p>2320</p>  | <p>2330</p>  | <p>2690</p>  | <p>1910</p>  | <p>2520</p>  | <p>799.4</p> | <p>2395.3</p> | <p>3</p> | <p>0.0159</p> | <p>6.614</p> |
| <p>Ubiquitin-60S ribosomal protein L40 OS=Macaca fascicularis GN=UBA52 PE=2 SV=2</p> | <p>3 RL40_ MACFA,sp  POC275  RL40_PO NPY,sp P OC276 RL 40_SHEEP ,sp POCG 47 UBB_ HUMAN,s p POCG48  UBC_HU MAN,sp P OCG49 U BB_MOUS E,sp POC G50 UBC _MOUSE, sp POCG5 1 UBB_R AT,sp PO CG53 UB B_BOVIN, sp POCG5 4 UBB_C AVPO,sp  POCG55 </p> | <p>tLSD YNIQ k</p>         | <p>81%</p> | <p>38.5</p> | <p>52.99886</p> | <p>Ref</p> | <p>-0.27</p> | <p>-0.09</p> | <p>-0.14</p> | <p>-0.1</p>  | <p>0.13</p> | <p>-0.5</p>  | <p>-0.1</p>  | <p>29000</p> | <p>20400</p> | <p>25100</p> | <p>27200</p> | <p>30800</p> | <p>31500</p> | <p>21300</p> | <p>28000</p> | <p>845.5</p> | <p>1688.9</p> | <p>2</p> | <p>0.0089</p> | <p>5.264</p> |

|                                                                               |                                                                                                                                                                                                            |                    |     |      |          |     |        |       |       |                            |                            |                            |                           |      |      |      |      |                            |                            |                            |                           |       |        |   |        |       |
|-------------------------------------------------------------------------------|------------------------------------------------------------------------------------------------------------------------------------------------------------------------------------------------------------|--------------------|-----|------|----------|-----|--------|-------|-------|----------------------------|----------------------------|----------------------------|---------------------------|------|------|------|------|----------------------------|----------------------------|----------------------------|---------------------------|-------|--------|---|--------|-------|
| Ubiquitin-60S ribosomal protein L40 OS=Macaca fascicularis GN=UBA52 PE=2 SV=2 | 3 RL40_MACFA,sp POC275 RL40_PONPY,sp POC276 RL40_SHEEP,sp POCG47 UBB_HUMAN,sp POCG48 UBC_HUMAN,sp POCG49 UBB_MOUSE,sp POCG50 UBC_MOUSE,sp POCG51 UBB_RAT,sp POCG53 UBB_BOVIN,sp POCG54 UBB_CAVPO,sp POCG55 | tLSDYNIQkESTLHLVLR | 87% | 41.2 | 53.32661 | Ref | -0.086 | -0.32 | -0.06 | -0.093                     | 0.095                      | -0.04                      | -0.11                     | 2020 | 2180 | 2010 | 2710 | 2910                       | 2900                       | 2760                       | 2600                      | 685.4 | 2737.5 | 4 | 0.0163 | 5.935 |
| Thioredoxin OS=Ovis aries GN=TXN PE=1 SV=2                                    | sp P50413 THIO_SHEEP                                                                                                                                                                                       | IEATINELI          | 95% | 62.9 | 51.53248 | Ref | 0.15   | -0.29 | -0.23 | -0.37                      | -0.2                       | -0.21                      | -0.62                     | 246  | 261  | 210  | 245  | 244                        | 241                        | 251                        | 187                       | 660.4 | 1318.8 | 2 | 0.0049 | 3.683 |
| Thioredoxin OS=Ovis aries GN=TXN PE=1 SV=2                                    | sp P50413 THIO_SHEEP                                                                                                                                                                                       | IEATINELI          | 95% | 63.4 | 51.48229 | Ref | -0.1   | -0.51 | -0.18 | -0.17                      | -0.45                      | -0.58                      | -0.43                     | 267  | 167  | 137  | 194  | 214                        | 154                        | 147                        | 162                       | 660.4 | 1318.8 | 2 | 0.0052 | 3.956 |
| Thioredoxin OS=Ovis aries GN=TXN PE=1 SV=2                                    | sp P50413 THIO_SHEEP                                                                                                                                                                                       | IEATINELI          | 88% | 40.3 | 51.53544 | Ref | 0.64   | 0.9   | 0.34  | Value Missing (-3.0499606) | Value Missing (-2.8540883) | Value Missing (-2.9168549) | Value Missing (-2.905981) | 125  | 103  | 134  | 102  | Value Missing (-3.0499606) | Value Missing (-2.8540883) | Value Missing (-2.9168549) | Value Missing (-2.905981) | 660.4 | 1318.8 | 2 | 0.0051 | 3.865 |

|                                                  |                              |                           |     |      |          |     |        |       |       |        |       |       |       |       |       |       |       |       |       |       |       |       |        |   |        |       |
|--------------------------------------------------|------------------------------|---------------------------|-----|------|----------|-----|--------|-------|-------|--------|-------|-------|-------|-------|-------|-------|-------|-------|-------|-------|-------|-------|--------|---|--------|-------|
| Thioredoxin<br>OS=Ovis aries<br>GN=TXN PE=1 SV=2 | sp P5041<br>3 THIO_S<br>HEEP | vSEF<br>SGA<br>Nk         | 66% | 34.1 | 52.3474  | Ref | -0.25  | -0.33 | -0.18 | -0.14  | -0.06 | -0.54 | -0.45 | 24300 | 17100 | 17500 | 21800 | 24800 | 22800 | 17100 | 18100 | 773.9 | 1545.9 | 2 | 0.0092 | 5.978 |
| Thioredoxin<br>OS=Ovis aries<br>GN=TXN PE=1 SV=2 | sp P5041<br>3 THIO_S<br>HEEP | vSEF<br>SGA<br>Nk         | 80% | 37.5 | 52.31824 | Ref | -0.28  | -0.27 | -0.29 | -0.086 | -0.1  | -0.55 | -0.33 | 11700 | 8230  | 8990  | 9900  | 12600 | 10900 | 8340  | 9650  | 773.9 | 1545.8 | 2 | 0.024  | 15.53 |
| Thioredoxin<br>OS=Ovis aries<br>GN=TXN PE=1 SV=2 | sp P5041<br>3 THIO_S<br>HEEP | yAF<br>QEAL<br>NSA<br>Gek | 95% | 61.6 | 53.7751  | Ref | -0.31  | -0.42 | -0.1  | 0.071  | -0.32 | -0.64 | -0.16 | 28200 | 20400 | 20500 | 28700 | 35700 | 23800 | 20000 | 27500 | 679.4 | 2035.1 | 3 | 0.0212 | 10.42 |
| Thioredoxin<br>OS=Ovis aries<br>GN=TXN PE=1 SV=2 | sp P5041<br>3 THIO_S<br>HEEP | yAF<br>QEAL<br>NSA<br>Gek | 95% | 52.2 | 53.7751  | Ref | -0.33  | -0.36 | -0.3  | -0.055 | -0.15 | -0.37 | -0.27 | 29600 | 20600 | 21800 | 25600 | 33500 | 27300 | 24600 | 26200 | 679.4 | 2035.1 | 3 | 0.0212 | 10.42 |
| Thioredoxin<br>OS=Ovis aries<br>GN=TXN PE=1 SV=2 | sp P5041<br>3 THIO_S<br>HEEP | yAF<br>QEAL<br>NSA<br>Gek | 94% | 51.3 | 53.78222 | Ref | -0.24  | -0.53 | -0.07 | -0.29  | -0.1  | -0.37 | -0.31 | 31900 | 22900 | 20400 | 31300 | 29600 | 29500 | 25500 | 26500 | 679.4 | 2035.1 | 3 | 0.0176 | 8.627 |
| Thioredoxin<br>OS=Ovis aries<br>GN=TXN PE=1 SV=2 | sp P5041<br>3 THIO_S<br>HEEP | yAF<br>QEAL<br>NSA<br>Gek | 90% | 45.6 | 53.79298 | Ref | -0.053 | -0.31 | -0.05 | -0.11  | -0.33 | -0.32 | -0.51 | 19400 | 18500 | 16800 | 22600 | 23800 | 17900 | 18800 | 16300 | 679.4 | 2035.1 | 3 | 0.0166 | 8.171 |
| Thioredoxin<br>OS=Ovis aries<br>GN=TXN PE=1 SV=2 | sp P5041<br>3 THIO_S<br>HEEP | yAF<br>QEAL<br>NSA<br>Gek | 94% | 51   | 53.84499 | Ref | -0.036 | -0.26 | -0.33 | -0.21  | -0.18 | -0.39 | -0.26 | 4430  | 4190  | 3880  | 4160  | 4970  | 4440  | 4020  | 4350  | 679.4 | 2035.1 | 3 | 0.0057 | 2.778 |



|                                                           |                                                                                                     |                           |     |      |          |     |       |       |       |        |       |       |       |       |       |       |       |       |       |       |       |       |        |   |        |       |
|-----------------------------------------------------------|-----------------------------------------------------------------------------------------------------|---------------------------|-----|------|----------|-----|-------|-------|-------|--------|-------|-------|-------|-------|-------|-------|-------|-------|-------|-------|-------|-------|--------|---|--------|-------|
| Thioredoxin<br>OS=Ovis aries<br>GN=TXN PE=1 SV=2          | sp P5041<br>3 THIO_S<br>HEEP                                                                        | yAF<br>QEAL<br>NSA<br>Gek | 95% | 64.9 | 53.75737 | Ref | -0.22 | -0.43 | -0.25 | -0.11  | -0.07 | -0.62 | -0.29 | 4300  | 3040  | 2850  | 3630  | 4400  | 3950  | 2820  | 3520  | 1019  | 2035.1 | 2 | 0.0202 | 9.941 |
| Thioredoxin<br>OS=Ovis aries<br>GN=TXN PE=1 SV=2          | sp P5041<br>3 THIO_S<br>HEEP                                                                        | yAF<br>QEAL<br>NSA<br>Gek | 95% | 52.5 | 53.75859 | Ref | -0.33 | -0.32 | -0.45 | -0.24  | -0.21 | -0.57 | 0.18  | 4670  | 3200  | 3510  | 3590  | 4570  | 4080  | 3320  | 5530  | 1019  | 2035.1 | 2 | 0.0178 | 8.742 |
| Thioredoxin<br>OS=Ovis aries<br>GN=TXN PE=1 SV=2          | sp P5041<br>3 THIO_S<br>HEEP                                                                        | yAF<br>QEAL<br>NSA<br>Gek | 93% | 47.6 | 54.36692 | Ref | -0.37 | -0.27 | -0.14 | -0.21  | -0.23 | -0.21 | -0.24 | 8680  | 6480  | 7530  | 9240  | 9700  | 8370  | 8840  | 8570  | 585.8 | 2339.3 | 4 | 0.0287 | 12.25 |
| Thioredoxin<br>OS=Ovis aries<br>GN=TXN PE=1 SV=2          | sp P5041<br>3 THIO_S<br>HEEP                                                                        | yAF<br>QEAL<br>nSA<br>Gek | 61% | 35   | 53.67697 | Ref | 0.17  | -0.09 | -0.28 | -0.37  | -0.6  | -0.25 | -0.52 | 34900 | 34800 | 31400 | 31000 | 32000 | 23900 | 31700 | 26200 | 679.7 | 2036.1 | 3 | 0.0176 | 8.628 |
| Thioredoxin<br>OS=Ovis aries<br>GN=TXN PE=1 SV=2          | sp P5041<br>3 THIO_S<br>HEEP                                                                        | yAF<br>QEAL<br>nSA<br>Gek | 95% | 54.5 | 53.67147 | Ref | -0.25 | -0.3  | -0.25 | -0.15  | -0.04 | -0.42 | -0.45 | 17300 | 12800 | 13400 | 15600 | 18500 | 17400 | 14000 | 13600 | 1019  | 2036.1 | 2 | 0.0169 | 8.32  |
| Thioredoxin<br>OS=Ovis aries<br>GN=TXN PE=1 SV=2          | sp P5041<br>3 THIO_S<br>HEEP                                                                        | yAF<br>QEAL<br>nSA<br>Gek | 89% | 45.4 | 54.50312 | Ref | -0.24 | -0.32 | -0.05 | -0.084 | -0.25 | -0.5  | -0.55 | 10600 | 7420  | 7630  | 10300 | 11100 | 8670  | 7610  | 7300  | 781.1 | 2340.2 | 3 | 0.0244 | 10.42 |
| Alpha-actinin-4<br>OS=Bos taurus<br>GN=ACTN4 PE=2<br>SV=1 | sp A5D7D<br>1 ACTN4_<br>BOVIN,tr <br>E2R5T9 E<br>2R5T9_CA<br>NFA,tr F1<br>PLA7 F1P<br>LA7_CANF<br>A | dGLA<br>FNAL<br>IHR       | 95% | 59   | 52.38701 | Ref | -0.11 | -0.4  | -0.33 | -0.33  | -0.55 | -0.26 | 0.022 | 3070  | 2820  | 2500  | 2960  | 3240  | 2440  | 3110  | 3760  | 511   | 1529.9 | 3 | 0.0084 | 5.489 |

|                                                           |                                                                           |                            |     |      |          |     |        |       |       |       |       |       |       |       |        |       |        |        |       |       |        |       |        |   |        |       |
|-----------------------------------------------------------|---------------------------------------------------------------------------|----------------------------|-----|------|----------|-----|--------|-------|-------|-------|-------|-------|-------|-------|--------|-------|--------|--------|-------|-------|--------|-------|--------|---|--------|-------|
| Alpha-actinin-4<br>OS=Bos taurus<br>GN=ACTN4 PE=2<br>SV=1 | sp A5D7D1 ACTN4_BOVIN, tr E2R5T9 E2R5T9_CA NFA, tr F1 PLA7 F1P LA7_CANF A | eLPP<br>DQA<br>EYcl<br>AR  | 84% | 37.6 | 50.75554 | Ref | -0.21  | -0.21 | -0.61 | -0.18 | -0.27 | -0.22 | -0.45 | 5180  | 3880   | 4210  | 3600   | 5340   | 4360  | 4710  | 4000   | 927.9 | 1853.9 | 2 | 0.0166 | 8.939 |
| Alpha-actinin-4<br>OS=Bos taurus<br>GN=ACTN4 PE=2<br>SV=1 | sp A5D7D1 ACTN4_BOVIN, tr E2R5T9 E2R5T9_CA NFA, tr F1 PLA7 F1P LA7_CANF A | eLPP<br>DQA<br>EYcl<br>AR  | 65% | 32.4 | 50.75284 | Ref | -0.21  | -0.01 | -0.58 | -0.29 | -0.4  | -0.22 | -0.65 | 9020  | 6240   | 7800  | 5910   | 7970   | 6440  | 7610  | 5620   | 927.9 | 1853.9 | 2 | 0.0163 | 8.809 |
| Alpha-actinin-4<br>OS=Bos taurus<br>GN=ACTN4 PE=2<br>SV=1 | sp A5D7D1 ACTN4_BOVIN, tr E2R5T9 E2R5T9_CA NFA, tr F1 PLA7 F1P LA7_CANF A | fAIQ<br>DISV<br>EETS<br>Ak | 95% | 57.8 | 54.15826 | Ref | -0.065 | -0.36 | -0.52 | -0.35 | -0.67 | 0.005 | -0.53 | 9400  | 6870   | 6090  | 6110   | 7590   | 5290  | 8820  | 6040   | 716.1 | 2145.2 | 3 | 0.0126 | 5.852 |
| Alpha-actinin-4<br>OS=Bos taurus<br>GN=ACTN4 PE=2<br>SV=1 | sp A5D7D1 ACTN4_BOVIN, tr E2R5T9 E2R5T9_CA NFA, tr F1 PLA7 F1P LA7_CANF A | gISQ<br>EQM<br>QEF<br>R    | 95% | 46.7 | 51.03161 | Ref | -0.18  | -0.05 | -0.62 | -0.23 | -0.3  | -0.31 | -0.5  | 19800 | 15100  | 17900 | 13600  | 19600  | 16300 | 16900 | 14700  | 828.9 | 1655.8 | 2 | 0.0124 | 7.5   |
| Alpha-actinin-4<br>OS=Bos taurus<br>GN=ACTN4 PE=2<br>SV=1 | sp A5D7D1 ACTN4_BOVIN, tr E2R5T9 E2R5T9_CA NFA, tr F1 PLA7 F1P LA7_CANF A | hTNY<br>TME<br>HIR         | 95% | 71.8 | 50.82645 | Ref | -0.055 | 0.014 | -0.23 | -0.55 | -0.24 | -0.36 | -0.72 | 2E+05 | 147000 | 2E+05 | 158000 | 140000 | 2E+05 | 1E+05 | 112000 | 402.2 | 1604.8 | 4 | 0.0117 | 7.302 |
| Alpha-actinin-4<br>OS=Bos taurus<br>GN=ACTN4 PE=2<br>SV=1 | sp A5D7D1 ACTN4_BOVIN, tr E2R5T9 E2R5T9_CA NFA, tr F1 PLA7 F1P LA7_CANF A | hTNY<br>TME<br>HIR         | 66% | 32.8 | 50.89693 | Ref | -0.28  | -0.24 | -0.53 | -0.26 | -0.37 | -0.11 | -0.48 | 16900 | 11300  | 12700 | 11600  | 15400  | 12500 | 15600 | 12000  | 803.4 | 1604.8 | 2 | 0.0096 | 5.986 |

|                                                           |                                                                         |                        |     |      |          |     |       |       |       |       |       |       |       |       |       |       |       |       |       |       |       |       |        |   |        |       |
|-----------------------------------------------------------|-------------------------------------------------------------------------|------------------------|-----|------|----------|-----|-------|-------|-------|-------|-------|-------|-------|-------|-------|-------|-------|-------|-------|-------|-------|-------|--------|---|--------|-------|
| Alpha-actinin-4<br>OS=Bos taurus<br>GN=ACTN4 PE=2<br>SV=1 | sp A5D7D1 ACTN4_BOVIN, tr E2R5T9 E2R5T9_CA NFA, tr F1PLA7 F1PLA7_CANF A | mAP YQG PDA VPG ALDY k | 58% | 35.3 | 54.64251 | Ref | -0.17 | -0.54 | -0.35 | -0.21 | -0.05 | -0.16 | -0.75 | 5140  | 3960  | 3320  | 4270  | 5170  | 5040  | 4860  | 3230  | 801.1 | 2400.2 | 3 | 0.0243 | 10.14 |
| Alpha-actinin-4<br>OS=Bos taurus<br>GN=ACTN4 PE=2<br>SV=1 | sp A5D7D1 ACTN4_BOVIN, tr E2R5T9 E2R5T9_CA NFA, tr F1PLA7 F1PLA7_CANF A | qLETI DQL HLEY Ak      | 95% | 59.9 | 53.8433  | Ref | -0.18 | -0.2  | -0.62 | -0.11 | -0.31 | -0.23 | -0.37 | 9070  | 7590  | 8120  | 6780  | 10700 | 8110  | 8950  | 8060  | 770.4 | 2308.3 | 3 | 0.0065 | 2.829 |
| Alpha-actinin-4<br>OS=Bos taurus<br>GN=ACTN4 PE=2<br>SV=1 | sp A5D7D1 ACTN4_BOVIN, tr E2R5T9 E2R5T9_CA NFA, tr F1PLA7 F1PLA7_CANF A | rDH ALLE EQSk          | 51% | 33.6 | 54.11472 | Ref | -0.29 | -0.07 | -0.47 | -0.23 | -0.22 | -0.32 | -0.39 | 13500 | 10500 | 13200 | 11200 | 14700 | 12900 | 12500 | 11900 | 645.4 | 1933.1 | 3 | 0.0212 | 10.95 |
| Alpha-actinin-4<br>OS=Bos taurus<br>GN=ACTN4 PE=2<br>SV=1 | sp A5D7D1 ACTN4_BOVIN, tr E2R5T9 E2R5T9_CA NFA, tr F1PLA7 F1PLA7_CANF A | tINE VEN QILT R        | 73% | 37.1 | 53.0418  | Ref | -0.16 | -0.35 | -0.19 | -0.23 | -0.33 | -0.17 | -0.33 | 8560  | 8410  | 8020  | 10100 | 10700 | 8740  | 10300 | 9080  | 578.7 | 1732.9 | 3 | 0.0171 | 9.854 |
| Alpha-actinin-4<br>OS=Bos taurus<br>GN=ACTN4 PE=2<br>SV=1 | sp A5D7D1 ACTN4_BOVIN, tr E2R5T9 E2R5T9_CA NFA, tr F1PLA7 F1PLA7_CANF A | tINE VEN QILT R        | 70% | 35.8 | 53.00008 | Ref | -0.26 | -0.32 | -0.33 | -0.17 | -0.47 | -0.08 | -0.45 | 11300 | 8480  | 8840  | 9830  | 12100 | 8570  | 11800 | 9010  | 867.5 | 1733   | 2 | 0.0099 | 5.692 |
| Alpha-actinin-4<br>OS=Bos taurus<br>GN=ACTN4 PE=2<br>SV=1 | sp A5D7D1 ACTN4_BOVIN, tr E2R5T9 E2R5T9_CA NFA, tr F1PLA7 F1PLA7_CANF A | vGW EQLL TTIA R        | 89% | 43.7 | 52.71153 | Ref | -0.19 | -0.13 | -0.48 | -0.22 | -0.37 | -0.03 | -0.78 | 1180  | 911   | 1040  | 911   | 1200  | 942   | 1250  | 738   | 564.3 | 1690   | 3 | 0.0119 | 7.036 |

|                                                                   |                                                                                                                                                                |                                  |     |      |          |     |       |       |       |       |       |       |       |      |      |      |      |      |      |      |      |       |        |   |        |       |
|-------------------------------------------------------------------|----------------------------------------------------------------------------------------------------------------------------------------------------------------|----------------------------------|-----|------|----------|-----|-------|-------|-------|-------|-------|-------|-------|------|------|------|------|------|------|------|------|-------|--------|---|--------|-------|
| Alpha-actinin-4<br>OS=Bos taurus<br>GN=ACTN4 PE=2<br>SV=1         | sp A5D7D1 ACTN4_BOVIN, tr E2R5T9 E2R5T9_CA NFA, tr F1PLA7 F1PLA7_CANF A                                                                                        | vGW<br>EQLL<br>TTIA<br>R         | 91% | 43.6 | 52.82695 | Ref | -0.19 | -0.09 | -0.73 | -0.14 | -0.44 | -0.15 | -0.63 | 1500 | 1060 | 1230 | 890  | 1470 | 1050 | 1330 | 953  | 846   | 1690   | 2 | 0.0099 | 5.838 |
| Alpha-actinin-4<br>OS=Bos taurus<br>GN=ACTN4 PE=2<br>SV=1         | sp A5D7D1 ACTN4_BOVIN, tr E2R5T9 E2R5T9_CA NFA, tr F1PLA7 F1PLA7_CANF A                                                                                        | vGW<br>EQLL<br>TTIA<br>R         | 90% | 42.5 | 52.48574 | Ref | -0.25 | -0.3  | -0.65 | 0.085 | -0.51 | -0.04 | -0.59 | 1200 | 873  | 917  | 810  | 1480 | 855  | 1240 | 842  | 846   | 1690   | 2 | #####  | 0.492 |
| Integrin beta-1<br>OS=Camelus bactrianus<br>GN=ITGB1 PE=2<br>SV=1 | sp A5Z1X6 ITB1_C AMBA, sp B0FY4 ITB1_SHEEP, sp P53712 ITB1_BOVIN, sp Q9GLP0 ITB1_PIG, tr C7AR56 C7AR56_LITWA, tr E2RT52 E2RT52_CA NFA, tr F1RVE7 F1RVE7_PIG ck | dkLP<br>QPG<br>QVD<br>PLSH<br>ck | 51% | 34.2 | 54.64542 | Ref | -0.34 | 0.046 | 0.13  | 0.055 | -0.28 | 0.11  | -0.1  | 1310 | 889  | 1260 | 1500 | 1570 | 1090 | 1490 | 1270 | 907.5 | 2719.5 | 3 | 0.0139 | 5.112 |

|                                                                      |                                                                                                                                                     |                    |     |      |          |     |       |      |       |      |       |       |       |       |       |       |       |        |       |       |       |       |        |   |        |       |
|----------------------------------------------------------------------|-----------------------------------------------------------------------------------------------------------------------------------------------------|--------------------|-----|------|----------|-----|-------|------|-------|------|-------|-------|-------|-------|-------|-------|-------|--------|-------|-------|-------|-------|--------|---|--------|-------|
| Integrin beta-1<br>OS=Camelus<br>bactrianus<br>GN=ITGB1 PE=2<br>SV=1 | sp A5Z1X6 ITB1_CAMBA,sp B0FY4 ITB1_SHEEP,sp P53712 ITB1_BOVIN,sp Q9GLP0 ITB1_PIG,tr C7AR56 C7AR56_LITWA,tr E2RT52 E2RT52_CANFA,tr F1RVE7 F1RVE7_PIG | dNT<br>NEIY<br>SGk | 95% | 52.2 | 52.73615 | Ref | -0.76 | 0.24 | -0.01 | 0.14 | -0.03 | 0.098 | -0.08 | 13800 | 7500  | 16200 | 15400 | 18800  | 14600 | 16600 | 14600 | 875   | 1747.9 | 2 | 0.0201 | 11.5  |
| Integrin beta-1<br>OS=Camelus<br>bactrianus<br>GN=ITGB1 PE=2<br>SV=1 | sp A5Z1X6 ITB1_CAMBA,sp B0FY4 ITB1_SHEEP,sp P53712 ITB1_BOVIN,sp Q9GLP0 ITB1_PIG,tr C7AR56 C7AR56_LITWA,tr E2RT52 E2RT52_CANFA,tr F1RVE7 F1RVE7_PIG | dNT<br>NEIY<br>SGk | 56% | 33.1 | 52.84372 | Ref | -0.42 | 0.23 | -0.19 | 0.04 | -0.26 | 0.31  | -0.15 | 95100 | 61200 | 1E+05 | 87800 | 113000 | 80400 | 1E+05 | 90200 | 583.6 | 1747.9 | 3 | 0.0167 | 9.564 |

|                                                                      |                                                                                                                                                     |                    |     |    |          |     |       |     |       |       |       |      |       |      |      |      |      |      |      |      |      |       |        |   |        |       |
|----------------------------------------------------------------------|-----------------------------------------------------------------------------------------------------------------------------------------------------|--------------------|-----|----|----------|-----|-------|-----|-------|-------|-------|------|-------|------|------|------|------|------|------|------|------|-------|--------|---|--------|-------|
| Integrin beta-1<br>OS=Camelus<br>bactrianus<br>GN=ITGB1 PE=2<br>SV=1 | sp A5Z1X6 ITB1_CAMBA,sp B0FY4 ITB1_SHEEP,sp P53712 ITB1_BOVIN,sp Q9GLP0 ITB1_PIG,tr C7AR56 C7AR56_LITWA,tr E2RT52 E2RT52_CANFA,tr F1RVE7 F1RVE7_PIG | dNTn<br>EIYS<br>Gk | 94% | 46 | 52.33189 | Ref | -0.66 | 0.3 | -0.12 | 0.096 | -0.12 | 0.12 | -0.11 | 5130 | 2750 | 5820 | 4880 | 6250 | 4700 | 5790 | 4890 | 875.4 | 1748.9 | 2 | 0.0205 | 11.7  |
| Integrin beta-1<br>OS=Camelus<br>bactrianus<br>GN=ITGB1 PE=2<br>SV=1 | sp A5Z1X6 ITB1_CAMBA,sp B0FY4 ITB1_SHEEP,sp P53712 ITB1_BOVIN,sp Q9GLP0 ITB1_PIG,tr C7AR56 C7AR56_LITWA,tr E2RT52 E2RT52_CANFA,tr F1RVE7 F1RVE7_PIG | iGFG<br>SFVE<br>k  | 61% | 33 | 52.04996 | Ref | -0.54 | 0.3 | -0.03 | 0.055 | -0.13 | 0.12 | -0.13 | 5930 | 3720 | 7220 | 6420 | 7530 | 5780 | 7190 | 5990 | 796.5 | 1590.9 | 2 | 0.0077 | 4.812 |

|                                                                      |                                                                                                                                                 |                                   |     |      |          |     |       |       |       |        |       |       |       |      |      |      |      |      |      |      |      |       |        |   |        |       |
|----------------------------------------------------------------------|-------------------------------------------------------------------------------------------------------------------------------------------------|-----------------------------------|-----|------|----------|-----|-------|-------|-------|--------|-------|-------|-------|------|------|------|------|------|------|------|------|-------|--------|---|--------|-------|
| Integrin beta-1<br>OS=Camelus<br>bactrianus<br>GN=ITGB1 PE=2<br>SV=1 | sp A5Z1X6 ITB1_CAMBA,sp B0FYY4 ITB1_SHEEP,sp P53712 ITB1_BOVIN,sp Q9GLP0 ITB1_PIG,tra C7AR56 C7AR56_LITWA,tra E2RT52 E2RT52_CAF1RVE7 F1RVE7_PIG | ILVFS<br>TDA<br>GFH<br>FAG<br>DGk | 90% | 47   | 54.81507 | Ref | -0.54 | 0.067 | -0    | -0.024 | 0.061 | 0.25  | -0.02 | 1590 | 1080 | 1790 | 1920 | 2080 | 1930 | 2300 | 1890 | 797.4 | 2389.3 | 3 | 0.0121 | 5.057 |
| Integrin beta-1<br>OS=Camelus<br>bactrianus<br>GN=ITGB1 PE=2<br>SV=1 | sp A5Z1X6 ITB1_CAMBA,sp B0FYY4 ITB1_SHEEP,sp P53712 ITB1_BOVIN,sp Q9GLP0 ITB1_PIG,tra C7AR56 C7AR56_LITWA,tra E2RT52 E2RT52_CAF1RVE7 F1RVE7_PIG | ILVFS<br>TDA<br>GFH<br>FAG<br>DGk | 59% | 35.5 | 54.63171 | Ref | -0.24 | 0.24  | -0.03 | -0.12  | -0.22 | 0.057 | -0.21 | 641  | 423  | 639  | 594  | 616  | 500  | 635  | 523  | 797.4 | 2389.3 | 3 | 0.004  | 1.68  |

|                                                                      |                                                                                                                                                                                                                     |                                    |     |      |          |     |       |      |       |        |       |       |       |       |      |       |       |       |       |       |       |       |        |   |        |       |
|----------------------------------------------------------------------|---------------------------------------------------------------------------------------------------------------------------------------------------------------------------------------------------------------------|------------------------------------|-----|------|----------|-----|-------|------|-------|--------|-------|-------|-------|-------|------|-------|-------|-------|-------|-------|-------|-------|--------|---|--------|-------|
| Integrin beta-1<br>OS=Camelus<br>bactrianus<br>GN=ITGB1 PE=2<br>SV=1 | sp A5Z1X6 ITB1_C<br>AMBA,sp <br>B0FY4 IT<br>B1_SHEEP<br>,sp P5371<br>2 ITB1_B<br>OVIN,sp <br>Q9GLP0  <br>TB1_PIG,t<br>r C7AR56<br> C7AR56_<br>LITWA,tr <br>E2RT52 E<br>2RT52_CA<br>NFA,tr F1<br>RVE7 F1R<br>VE7_PIG | IPEG<br>VTIN<br>Yk                 | 81% | 37.9 | 52.32289 | Ref | -0.36 | 0.38 | -0.12 | -0.079 | -0.17 | -0.09 | -0.16 | 14000 | 8380 | 15100 | 12100 | 13600 | 11200 | 12400 | 11700 | 871.5 | 1741   | 2 | 0.0196 | 11.26 |
| Integrin beta-1<br>OS=Camelus<br>bactrianus<br>GN=ITGB1 PE=2<br>SV=1 | sp A5Z1X6 ITB1_C<br>AMBA,sp <br>B0FY4 IT<br>B1_SHEEP<br>,sp P5371<br>2 ITB1_B<br>OVIN,sp <br>Q9GLP0  <br>TB1_PIG,t<br>r C7AR56<br> C7AR56_<br>LITWA,tr <br>E2RT52 E<br>2RT52_CA<br>NFA,tr F1<br>RVE7 F1R<br>VE7_PIG | nVLS<br>LTDK<br>GEVF<br>NELV<br>Gk | 69% | 33.7 | 52.58621 | Ref | -0.45 | 0.11 | 0.065 | -0.005 | -0.15 | 0.2   | 0.054 | 907   | 660  | 1060  | 1150  | 1210  | 952   | 1270  | 1140  | 719.4 | 2873.6 | 4 | 0.027  | 9.386 |



|                                                                      |                                                                                                                                                                                                                      |                    |     |      |          |     |       |      |       |       |       |       |       |       |       |       |       |       |       |       |       |       |        |   |        |       |
|----------------------------------------------------------------------|----------------------------------------------------------------------------------------------------------------------------------------------------------------------------------------------------------------------|--------------------|-----|------|----------|-----|-------|------|-------|-------|-------|-------|-------|-------|-------|-------|-------|-------|-------|-------|-------|-------|--------|---|--------|-------|
| Integrin beta-1<br>OS=Camelus<br>bactrianus<br>GN=ITGB1 PE=2<br>SV=1 | sp A5Z1X6 ITB1_C<br>AMBA,sp <br>B0FYY4 IT<br>B1_SHEEP<br>,sp P5371<br>2 ITB1_B<br>OVIN,sp <br>Q9GLP0  <br>TB1_PIG,t<br>r C7AR56<br> C7AR56_<br>LITWA,tr <br>E2RT52 E<br>2RT52_CA<br>NFA,tr F1<br>RVE7 F1R<br>VE7_PIG | sAVT<br>TVV<br>NPK | 95% | 55.7 | 50.9626  | Ref | -0.51 | 0.31 | -0.07 | 0.061 | -0.1  | 6E-04 | -0.12 | 8700  | 5280  | 10100 | 8720  | 10500 | 8210  | 9180  | 8360  | 812.5 | 1623   | 2 | 0.0143 | 8.776 |
| Integrin beta-1<br>OS=Camelus<br>bactrianus<br>GN=ITGB1 PE=2<br>SV=1 | sp A5Z1X6 ITB1_C<br>AMBA,sp <br>B0FYY4 IT<br>B1_SHEEP<br>,sp P5371<br>2 ITB1_B<br>OVIN,sp <br>Q9GLP0  <br>TB1_PIG,t<br>r C7AR56<br> C7AR56_<br>LITWA,tr <br>E2RT52 E<br>2RT52_CA<br>NFA,tr F1<br>RVE7 F1R<br>VE7_PIG | sGEP<br>QTFT<br>Lk | 81% | 38.7 | 52.90645 | Ref | -0.59 | 0.25 | -0.13 | 0.02  | -0.18 | 0.17  | 0.032 | 20100 | 11600 | 22600 | 19400 | 23800 | 18100 | 24000 | 21700 | 858.5 | 1714.9 | 2 | 0.0221 | 12.86 |

|                                                                      |                                                                                                                                                                                                                      |                         |     |      |          |     |       |      |       |        |       |      |       |       |       |       |       |       |       |       |       |       |        |   |        |       |
|----------------------------------------------------------------------|----------------------------------------------------------------------------------------------------------------------------------------------------------------------------------------------------------------------|-------------------------|-----|------|----------|-----|-------|------|-------|--------|-------|------|-------|-------|-------|-------|-------|-------|-------|-------|-------|-------|--------|---|--------|-------|
| Integrin beta-1<br>OS=Camelus<br>bactrianus<br>GN=ITGB1 PE=2<br>SV=1 | sp A5Z1X6 ITB1_C<br>AMBA,sp <br>B0FYY4 IT<br>B1_SHEEP<br>,sp P5371<br>2 ITB1_B<br>OVIN,sp <br>Q9GLP0  <br>TB1_PIG,t<br>r C7AR56<br> C7AR56_<br>LITWA,tr <br>E2RT52 E<br>2RT52_CA<br>NFA,tr F1<br>RVE7 F1R<br>VE7_PIG | SLGT<br>DLM<br>NEM<br>R | 94% | 44   | 50.45124 | Ref | -0.35 | 0.41 | -0.19 | -0.081 | -0.16 | 0.17 | -0.1  | 23000 | 17000 | 31300 | 23200 | 27500 | 22800 | 29800 | 24500 | 785.9 | 1569.8 | 2 | 0.0141 | 8.996 |
| Integrin beta-1<br>OS=Camelus<br>bactrianus<br>GN=ITGB1 PE=2<br>SV=1 | sp A5Z1X6 ITB1_C<br>AMBA,sp <br>B0FYY4 IT<br>B1_SHEEP<br>,sp P5371<br>2 ITB1_B<br>OVIN,sp <br>Q9GLP0  <br>TB1_PIG,t<br>r C7AR56<br> C7AR56_<br>LITWA,tr <br>E2RT52 E<br>2RT52_CA<br>NFA,tr F1<br>RVE7 F1R<br>VE7_PIG | SLGT<br>DLM<br>NEM<br>R | 59% | 31.4 | 50.87817 | Ref | -0.29 | 0.17 | -0.01 | -0.009 | -0.24 | 0.21 | -0.04 | 13800 | 10900 | 16300 | 16100 | 17800 | 13200 | 18800 | 15700 | 785.9 | 1569.8 | 2 | 0.0041 | 2.63  |

|                                                                                     |                                                                                                                                                         |                           |     |      |          |     |       |      |       |        |       |       |       |       |       |       |       |       |       |       |       |     |        |   |        |       |
|-------------------------------------------------------------------------------------|---------------------------------------------------------------------------------------------------------------------------------------------------------|---------------------------|-----|------|----------|-----|-------|------|-------|--------|-------|-------|-------|-------|-------|-------|-------|-------|-------|-------|-------|-----|--------|---|--------|-------|
| Integrin beta-1<br>OS=Camelus<br>bactrianus<br>GN=ITGB1 PE=2<br>SV=1                | sp A5Z1X6 ITB1_CAMBA,sp B0FYY4 ITB1_SHEEP,sp P53712 ITB1_BOVIN,sp Q9GLP0 ITB1_PIG,tra C7AR56 C7AR56_LITWA,tra E2RT52 E2RT52_CANFA,tra F1RVE7 F1RVE7_PIG | tVM<br>PYIS<br>TTPA       | 90% | 43.4 | 53.23743 | Ref | -0.67 | 0.24 | -0.1  | 0.046  | -0.09 | 0.17  | -0.03 | 17900 | 9870  | 20000 | 17700 | 21700 | 17200 | 21600 | 18700 | 959 | 1916.1 | 2 | 0.0205 | 10.68 |
| Integrin beta-1<br>OS=Camelus<br>bactrianus<br>GN=ITGB1 PE=2<br>SV=1                | sp A5Z1X6 ITB1_CAMBA,sp B0FYY4 ITB1_SHEEP,sp P53712 ITB1_BOVIN,sp Q9GLP0 ITB1_PIG,tra C7AR56 C7AR56_LITWA,tra E2RT52 E2RT52_CANFA,tra F1RVE7 F1RVE7_PIG | wDT<br>GEN<br>PIYK        | 95% | 53.6 | 53.30576 | Ref | -0.68 | 0.36 | -0.02 | 0.04   | -0.12 | 0.12  | -0.2  | 20600 | 11100 | 24800 | 21300 | 24600 | 19200 | 23700 | 18800 | 916 | 1830   | 2 | 0.0211 | 11.52 |
| LIM and SH3<br>domain protein 1<br>OS=Rattus<br>norvegicus<br>GN=Lasp1 PE=1<br>SV=1 | sp Q99MZ8 LASP1_RAT,tra D3ZIA3 D3ZIA3_RAT,tra F1LN56 F1LN56_RAT,tra F6PSB8 F6PSB8_HORSE                                                                 | gFSV<br>VAD<br>TPEL<br>QR | 95% | 53.4 | 52.97977 | Ref | -0.86 | 0.13 | -1.1  | -0.076 | -0.32 | -0.27 | -0.72 | 37200 | 18100 | 38800 | 18900 | 41800 | 30800 | 33300 | 24100 | 862 | 1721.9 | 2 | 0.0125 | 7.279 |

|                                                                               |                                                                                         |                           |     |      |          |     |       |       |       |        |       |       |       |       |      |       |       |       |       |       |       |       |        |   |        |       |
|-------------------------------------------------------------------------------|-----------------------------------------------------------------------------------------|---------------------------|-----|------|----------|-----|-------|-------|-------|--------|-------|-------|-------|-------|------|-------|-------|-------|-------|-------|-------|-------|--------|---|--------|-------|
| LIM and SH3 domain protein 1<br>OS=Rattus norvegicus<br>GN=Lasp1 PE=1<br>SV=1 | sp Q99MZ8 LASP1_RAT, tr D3ZIA3 D3ZIA3_RAT, tr F1LN56 F1LN56_RAT, tr F6PSB8 F6PSB8_HORSE | gFSV<br>VAD<br>TPEL<br>QR | 94% | 46.6 | 53.06238 | Ref | -0.95 | 0.11  | -0.85 | -0.073 | -0.35 | -0.19 | -0.79 | 18300 | 8810 | 19900 | 11500 | 21700 | 15700 | 18300 | 12000 | 862   | 1721.9 | 2 | 0.0124 | 7.209 |
| LIM and SH3 domain protein 1<br>OS=Rattus norvegicus<br>GN=Lasp1 PE=1<br>SV=1 | sp Q99MZ8 LASP1_RAT, tr D3ZIA3 D3ZIA3_RAT, tr F1LN56 F1LN56_RAT, tr F6PSB8 F6PSB8_HORSE | gFSV<br>VAD<br>TPEL<br>QR | 93% | 45.8 | 53.07318 | Ref | -1    | 0.08  | -0.86 | -0.053 | -0.32 | -0.28 | -0.82 | 19000 | 7890 | 18300 | 10700 | 20700 | 15000 | 16100 | 11000 | 862   | 1721.9 | 2 | 0.0122 | 7.07  |
| LIM and SH3 domain protein 1<br>OS=Rattus norvegicus<br>GN=Lasp1 PE=1<br>SV=1 | sp Q99MZ8 LASP1_RAT, tr D3ZIA3 D3ZIA3_RAT, tr F1LN56 F1LN56_RAT, tr F6PSB8 F6PSB8_HORSE | gFSV<br>VAD<br>TPEL<br>QR | 95% | 62.9 | 53.03337 | Ref | -0.6  | 0.16  | -1.1  | -0.27  | -0.26 | -0.4  | -0.64 | 16400 | 9810 | 18000 | 8730  | 16600 | 14600 | 13800 | 11600 | 575   | 1721.9 | 3 | 0.0112 | 6.476 |
| LIM and SH3 domain protein 1<br>OS=Rattus norvegicus<br>GN=Lasp1 PE=1<br>SV=1 | sp Q99MZ8 LASP1_RAT, tr D3ZIA3 D3ZIA3_RAT, tr F1LN56 F1LN56_RAT, tr F6PSB8 F6PSB8_HORSE | kPYc<br>nAH<br>YPk        | 67% | 36.9 | 54.37817 | Ref | -0.67 | -0.13 | -0.57 | -0.18  | -0.32 | -0.26 | -0.52 | 15500 | 9810 | 15500 | 12800 | 18500 | 14700 | 16000 | 13300 | 727.4 | 2179.1 | 3 | 0.0303 | 13.88 |

|                                                                               |                                                                                         |                            |     |      |          |     |       |       |       |        |       |       |       |       |       |       |       |        |       |       |       |       |        |   |        |       |
|-------------------------------------------------------------------------------|-----------------------------------------------------------------------------------------|----------------------------|-----|------|----------|-----|-------|-------|-------|--------|-------|-------|-------|-------|-------|-------|-------|--------|-------|-------|-------|-------|--------|---|--------|-------|
| LIM and SH3 domain protein 1<br>OS=Rattus norvegicus<br>GN=Lasp1 PE=1<br>SV=1 | sp Q99MZ8 LASP1_RAT, tr D3ZIA3 D3ZIA3_RAT, tr F1LN56 F1LN56_RAT, tr F6PSB8 F6PSB8_HORSE | mGPGGGEGIEPER              | 89% | 39.2 | 49.67806 | Ref | -1    | 0.18  | -1.1  | -0.15  | -0.26 | -0.34 | -0.71 | 17400 | 7070  | 17500 | 7950  | 17300  | 14000 | 13800 | 10600 | 818.4 | 1634.8 | 2 | 0.0132 | 8.049 |
| LIM and SH3 domain protein 1<br>OS=Rattus norvegicus<br>GN=Lasp1 PE=1<br>SV=1 | sp Q99MZ8 LASP1_RAT, tr D3ZIA3 D3ZIA3_RAT, tr F1LN56 F1LN56_RAT, tr F6PSB8 F6PSB8_HORSE | mGPGGGEGIEPER              | 54% | 31.9 | 52.09252 | Ref | -0.73 | 0.15  | -0.96 | -0.18  | -0.38 | -0.14 | -0.78 | 2450  | 1380  | 2760  | 1440  | 2720   | 2060  | 2550  | 1630  | 888.4 | 1774.9 | 2 | 0.0117 | 6.581 |
| LIM and SH3 domain protein 1<br>OS=Rattus norvegicus<br>GN=Lasp1 PE=1<br>SV=1 | sp Q99MZ8 LASP1_RAT, tr D3ZIA3 D3ZIA3_RAT, tr F1LN56 F1LN56_RAT, tr F6PSB8 F6PSB8_HORSE | qQSE<br>LQS<br>QVR         | 56% | 32.6 | 52.57827 | Ref | -1.1  | 0.11  | -0.98 | -0.093 | -0.46 | -0.14 | -0.86 | 1E+05 | 36800 | 93000 | 49200 | 100000 | 67900 | 88400 | 53100 | 753.9 | 1505.8 | 2 | 0.0125 | 8.328 |
| LIM and SH3 domain protein 1<br>OS=Rattus norvegicus<br>GN=Lasp1 PE=1<br>SV=1 | sp Q99MZ8 LASP1_RAT, tr D3ZIA3 D3ZIA3_RAT, tr F1LN56 F1LN56_RAT, tr F6PSB8 F6PSB8_HORSE | qSFT<br>MVA<br>DTPE<br>NLR | 95% | 73.7 | 52.41793 | Ref | -0.74 | -0.03 | -0.81 | -0.11  | -0.33 | -0.18 | -0.7  | 7750  | 4380  | 7790  | 5070  | 9080   | 6820  | 7930  | 5470  | 957   | 1911.9 | 2 | 0.0211 | 11.03 |

|                                                                               |                                                                                         |                                 |     |      |          |     |                                 |                                          |                                 |                                          |                                     |                                     |                                 |                                          |                                 |                                          |                                     |                                     |                                 |                                          |                                 |                                          |                                     |       |        |       |       |       |
|-------------------------------------------------------------------------------|-----------------------------------------------------------------------------------------|---------------------------------|-----|------|----------|-----|---------------------------------|------------------------------------------|---------------------------------|------------------------------------------|-------------------------------------|-------------------------------------|---------------------------------|------------------------------------------|---------------------------------|------------------------------------------|-------------------------------------|-------------------------------------|---------------------------------|------------------------------------------|---------------------------------|------------------------------------------|-------------------------------------|-------|--------|-------|-------|-------|
| LIM and SH3 domain protein 1<br>OS=Rattus norvegicus<br>GN=Lasp1 PE=1<br>SV=1 | sp Q99MZ8 LASP1_RAT, tr D3ZIA3 D3ZIA3_RAT, tr F1LN56 F1LN56_RAT, tr F6PSB8 F6PSB8_HORSE | qSFT<br>MVA<br>DTPE<br>NLR      | 95% | 56.3 | 52.67944 | Ref | -0.73                           | -0.03                                    | -0.8                            | -0.15                                    | -0.26                               | -0.26                               | -0.83                           | 23800                                    | 12500                           | 22000                                    | 14400                               | 25000                               | 20300                           | 21200                                    | 14200                           | 957                                      | 1912                                | 2     | 0.0127 | 6.618 |       |       |
| LIM and SH3 domain protein 1<br>OS=Rattus norvegicus<br>GN=Lasp1 PE=1<br>SV=1 | sp Q99MZ8 LASP1_RAT, tr D3ZIA3 D3ZIA3_RAT, tr F1LN56 F1LN56_RAT, tr F6PSB8 F6PSB8_HORSE | qSFT<br>mVA<br>DTPE<br>NLR      | 93% | 44.4 | 52.12704 | Ref | -0.96                           | -0.15                                    | -0.85                           | -0.093                                   | -0.32                               | -0.17                               | -0.53                           | 12400                                    | 5510                            | 10500                                    | 7240                                | 13500                               | 10100                           | 11700                                    | 9040                            | 965                                      | 1927.9                              | 2     | 0.0123 | 6.384 |       |       |
| LIM and SH3 domain protein 1<br>OS=Rattus norvegicus<br>GN=Lasp1 PE=1<br>SV=1 | sp Q99MZ8 LASP1_RAT, tr D3ZIA3 D3ZIA3_RAT, tr F1LN56 F1LN56_RAT, tr F6PSB8 F6PSB8_HORSE | tGDT<br>GML<br>PAN<br>YVEA<br>I | 52% | 31.8 | 52.35094 | Ref | Reference Missing (-0.21663873) | Reference Missing (-0.147758161.5612414) | Reference Missing (-0.46005102) | Reference Missing (-0.036757550.5646718) | Reference Missing (-0.564032019907) | Reference Missing (-0.32011.479343) | Reference Missing (-0.21663873) | Reference Missing (-0.147758161.5612414) | Reference Missing (-0.46005102) | Reference Missing (-0.036757550.5646718) | Reference Missing (-0.564032019907) | Reference Missing (-0.32011.479343) | Reference Missing (-0.21663873) | Reference Missing (-0.147758161.5612414) | Reference Missing (-0.46005102) | Reference Missing (-0.036757550.5646718) | Reference Missing (-0.564032019907) | 928.5 | 1854.9 | 2     | 0.016 | 8.604 |
| LIM and SH3 domain protein 1<br>OS=Rattus norvegicus<br>GN=Lasp1 PE=1<br>SV=1 | sp Q99MZ8 LASP1_RAT, tr D3ZIA3 D3ZIA3_RAT, tr F1LN56 F1LN56_RAT, tr F6PSB8 F6PSB8_HORSE | tQD<br>QISN<br>ik               | 87% | 43   | 53.46515 | Ref | -1.1                            | 0.021                                    | -1.1                            | -0.26                                    | -0.16                               | -0.14                               | -0.78                           | 2E+05                                    | 60400                           | 1E+05                                    | 71000                               | 142000                              | 1E+05                           | 1E+05                                    | 90000                           | 552.3                                    | 1653.9                              | 3     | 0.0163 | 9.875 |       |       |

|                                                                      |                                                                                         |              |     |      |          |     |       |       |       |        |       |       |       |       |       |       |       |       |       |       |       |       |        |   |        |       |
|----------------------------------------------------------------------|-----------------------------------------------------------------------------------------|--------------|-----|------|----------|-----|-------|-------|-------|--------|-------|-------|-------|-------|-------|-------|-------|-------|-------|-------|-------|-------|--------|---|--------|-------|
| LIM and SH3 domain protein 1 OS=Rattus norvegicus GN=Lasp1 PE=1 SV=1 | sp Q99MZ8 LASP1_RAT, tr D3ZIA3 D3ZIA3_RAT, tr F1LN56 F1LN56_RAT, tr F6PSB8 F6PSB8_HORSE | tQD QISN ik  | 95% | 49.7 | 53.45889 | Ref | -0.98 | 0.086 | -0.88 | 0.014  | -0.37 | -0.25 | -0.94 | 23600 | 10100 | 22800 | 13100 | 26900 | 17900 | 20400 | 12500 | 828   | 1653.9 | 2 | 0.0138 | 8.324 |
| LIM and SH3 domain protein 1 OS=Rattus norvegicus GN=Lasp1 PE=1 SV=1 | sp Q99MZ8 LASP1_RAT, tr D3ZIA3 D3ZIA3_RAT, tr F1LN56 F1LN56_RAT, tr F6PSB8 F6PSB8_HORSE | tQD QISN ik  | 94% | 47.6 | 53.42906 | Ref | -1.1  | -0.09 | -0.75 | -0.079 | -0.34 | -0.27 | -0.69 | 6910  | 2570  | 5600  | 3960  | 6960  | 5060  | 5560  | 4130  | 828   | 1653.9 | 2 | 0.019  | 11.49 |
| Integrin subunit alphaV OS=Ovis aries PE=2 SV=1                      | tr B0FYYS B0FYYS_SHEEP                                                                  | aGT QLLA GLR | 67% | 31.8 | 49.64962 | Ref | 0.23  | -0.06 | 0.4   | -0.09  | -0.2  | -0.09 | 0.3   | 24400 | 25400 | 22700 | 35000 | 27400 | 22100 | 25000 | 32400 | 652.4 | 1302.8 | 2 | 0.0085 | 6.541 |
| Integrin subunit alphaV OS=Ovis aries PE=2 SV=1                      | tr B0FYYS B0FYYS_SHEEP                                                                  | aLFL HNR     | 89% | 41.5 | 50.05948 | Ref | 0.18  | -0.1  | 0.3   | -0.32  | 0.038 | -0.33 | 0.71  | 4240  | 4950  | 4430  | 6570  | 4700  | 5260  | 4260  | 8700  | 392.2 | 1173.7 | 3 | 0.0055 | 4.686 |
| Integrin subunit alphaV OS=Ovis aries PE=2 SV=1                      | tr B0FYYS B0FYYS_SHEEP                                                                  | aLFL HNR     | 83% | 37.6 | 50.25425 | Ref | 0.04  | -0.23 | 0.24  | -0.036 | 0.05  | -0.32 | 0.72  | 6670  | 6710  | 6040  | 9400  | 8540  | 7910  | 6400  | 13000 | 392.2 | 1173.7 | 3 | 0.0138 | 11.79 |
| Integrin subunit alphaV OS=Ovis aries PE=2 SV=1                      | tr B0FYYS B0FYYS_SHEEP                                                                  | aLFL HNR     | 77% | 35.4 | 50.13154 | Ref | 0.25  | -0.1  | 0.39  | -0.24  | -0    | -0.37 | 0.66  | 12500 | 17000 | 14400 | 22700 | 16200 | 16700 | 13500 | 27400 | 392.2 | 1173.7 | 3 | 0.0097 | 8.287 |

|                                                 |                         |                  |     |      |          |     |       |       |      |        |       |       |       |       |       |       |       |       |       |       |       |       |        |   |        |       |
|-------------------------------------------------|-------------------------|------------------|-----|------|----------|-----|-------|-------|------|--------|-------|-------|-------|-------|-------|-------|-------|-------|-------|-------|-------|-------|--------|---|--------|-------|
| Integrin subunit alphaV OS=Ovis aries PE=2 SV=1 | tr B0FYYS B0FYYS_ SHEEP | aML HLQ WPK      | 57% | 33.4 | 52.96002 | Ref | 0.12  | -0.11 | 0.22 | 0.014  | -0.08 | 0.094 | 0.098 | 3140  | 2610  | 2410  | 3410  | 3250  | 2650  | 3140  | 3120  | 632.4 | 1894.1 | 3 | 0.0068 | 3.605 |
| Integrin subunit alphaV OS=Ovis aries PE=2 SV=1 | tr B0FYYS B0FYYS_ SHEEP | aSG DFQ TIK      | 69% | 34.8 | 52.32831 | Ref | 0.13  | -0.04 | 0.52 | -0.22  | -0.2  | -0.18 | 0.41  | 23200 | 22600 | 21800 | 36000 | 23800 | 21100 | 22400 | 33300 | 787.9 | 1573.9 | 2 | 0.0073 | 4.637 |
| Integrin subunit alphaV OS=Ovis aries PE=2 SV=1 | tr B0FYYS B0FYYS_ SHEEP | iLAc APly HWR    | 95% | 56.7 | 52.65422 | Ref | 0.39  | -0.25 | 0.36 | -0.26  | -0.12 | 0.18  | 0.038 | 551   | 602   | 419   | 717   | 515   | 495   | 636   | 571   | 565   | 1691.9 | 3 | 0.0118 | 6.955 |
| Integrin subunit alphaV OS=Ovis aries PE=2 SV=1 | tr B0FYYS B0FYYS_ SHEEP | IDFQ VELL LDK    | 91% | 45.2 | 51.46417 | Ref | 0.3   | -0.18 | 0.28 | -0.21  | -0.22 | 0.086 | -0.06 | 740   | 596   | 465   | 716   | 563   | 489   | 629   | 565   | 647.7 | 1940.1 | 3 | 0.0072 | 3.701 |
| Integrin subunit alphaV OS=Ovis aries PE=2 SV=1 | tr B0FYYS B0FYYS_ SHEEP | IDFQ VELL LDK    | 95% | 50   | 51.1225  | Ref | 0.26  | -0.4  | 0.42 | -0.019 | 0.099 | -0.1  | -0.03 | 239   | 216   | 148   | 294   | 239   | 227   | 207   | 214   | 647.7 | 1940.1 | 3 | 0.0017 | 0.872 |
| Integrin subunit alphaV OS=Ovis aries PE=2 SV=1 | tr B0FYYS B0FYYS_ SHEEP | IQEV GQV SVAL Qk | 95% | 60.6 | 51.13067 | Ref | -0.26 | -0.44 | 0.12 | -0.28  | 0.46  | 0.79  | -0    | 6430  | 5610  | 5380  | 8890  | 7430  | 10900 | 14300 | 8180  | 669.7 | 2006.2 | 3 | 0.0168 | 8.384 |
| Integrin subunit alphaV OS=Ovis aries PE=2 SV=1 | tr B0FYYS B0FYYS_ SHEEP | vDLA VVA AVEI R  | 88% | 39.3 | 50.41811 | Ref | 0.19  | 0.1   | 0.3  | -0.13  | -0.1  | -0.11 | 0.055 | 501   | 433   | 442   | 567   | 467   | 414   | 431   | 478   | 780   | 1557.9 | 2 | 0.0064 | 4.132 |



|                                                           |                                                     |                                            |     |      |          |     |       |       |       |        |       |       |       |       |       |       |       |       |       |       |       |       |        |   |        |       |
|-----------------------------------------------------------|-----------------------------------------------------|--------------------------------------------|-----|------|----------|-----|-------|-------|-------|--------|-------|-------|-------|-------|-------|-------|-------|-------|-------|-------|-------|-------|--------|---|--------|-------|
| Integrin subunit<br>alphaV OS=Ovis<br>aries PE=2 SV=1     | tr B0FYYS_  B0FYYS_ SHEEP                           | vDLA<br>VVA<br>AVEI<br>R                   | 66% | 31.8 | 49.90174 | Ref | 0.1   | 0.18  | 0.41  | 0.003  | -0.34 | -0.3  | 0.31  | 322   | 294   | 337   | 443   | 368   | 254   | 273   | 413   | 780   | 1557.9 | 2 | #####  | 0.166 |
| Integrin subunit<br>alphaV OS=Ovis<br>aries PE=2 SV=1     | tr B0FYYS_  B0FYYS_ SHEEP                           | vSPV<br>VSYK                               | 57% | 30.6 | 50.12943 | Ref | 0.33  | 0.12  | 0.32  | -0.35  | -0.07 | -0.04 | 0.11  | 13300 | 14000 | 13100 | 17000 | 11700 | 12400 | 13300 | 14600 | 496.3 | 1485.9 | 3 | 0.0035 | 2.333 |
| Integrin subunit<br>alphaV OS=Ovis<br>aries PE=2 SV=1     | tr B0FYYS_  B0FYYS_ SHEEP                           | ykEN<br>PETE<br>EDV<br>GPV<br>VQHI<br>YELR | 83% | 41.3 | 55.74362 | Ref | 0.075 | -0.2  | 0.48  | -0.073 | 0.037 | -0.05 | 0.31  | 1620  | 1640  | 1480  | 2650  | 1990  | 1880  | 1840  | 2360  | 813.9 | 3251.7 | 4 | 0.025  | 7.698 |
| MHC class I antigen<br>OS=Ovis aries<br>GN=ovar PE=2 SV=1 | tr A4ZVZ3_  A4ZVZ3_ SHEEP, tr  C6K2P4 C6K2P4_SH EEP | dYIA<br>LNED<br>LR                         | 55% | 32.4 | 52.54611 | Ref | -0.36 | 0.67  | 0.003 | 0.84   | -0.67 | 0.54  | -0.36 | 20800 | 7650  | 17100 | 12000 | 23700 | 7250  | 17500 | 9350  | 763.4 | 1524.8 | 2 | 0.0123 | 8.067 |
| MHC class I antigen<br>OS=Ovis aries<br>GN=ovar PE=2 SV=1 | tr A4ZVZ3_  A4ZVZ3_ SHEEP, tr  C6K2P4 C6K2P4_SH EEP | dYIA<br>LNED<br>LR                         | 50% | 31.9 | 52.58055 | Ref | 0.48  | -0.24 | 0.37  | 0.49   | 0.23  | 0.19  | 0.22  | 5230  | 4400  | 2890  | 4970  | 5930  | 4330  | 4400  | 4450  | 509.3 | 1524.8 | 3 | 0.011  | 7.186 |
| MHC class I antigen<br>OS=Ovis aries<br>GN=ovar PE=2 SV=1 | tr A4ZVZ3_  A4ZVZ3_ SHEEP, tr  C6K2P4 C6K2P4_SH EEP | dYIA<br>LNED<br>LR                         | 85% | 40   | 52.59728 | Ref | 0.29  | -1.2  | -0.08 | 1.1    | 0.8   | -1.4  | -0.22 | 45500 | 22400 | 8770  | 21100 | 52600 | 37600 | 8300  | 19200 | 763.4 | 1524.8 | 2 | 0.0097 | 6.389 |
| MHC class I antigen<br>OS=Ovis aries<br>GN=ovar PE=2 SV=1 | tr A4ZVZ3_  A4ZVZ3_ SHEEP, tr  C6K2P4 C6K2P4_SH EEP | fIAV<br>GYV<br>DDT<br>QFV<br>R             | 95% | 58.8 | 54.02602 | Ref | 0.33  | -0.63 | 0.81  | -0.32  | 1     | -0.72 | 0.98  | 2510  | 3390  | 1900  | 5770  | 2910  | 6430  | 2010  | 6460  | 967.5 | 1933   | 2 | 0.0173 | 8.952 |

|                                                           |                                                                    |                                |     |      |          |     |       |                                          |      |       |     |                                           |      |       |       |                                          |       |       |       |                                           |       |       |        |   |        |       |
|-----------------------------------------------------------|--------------------------------------------------------------------|--------------------------------|-----|------|----------|-----|-------|------------------------------------------|------|-------|-----|-------------------------------------------|------|-------|-------|------------------------------------------|-------|-------|-------|-------------------------------------------|-------|-------|--------|---|--------|-------|
| MHC class I antigen<br>OS=Ovis aries<br>GN=ovar PE=2 SV=1 | tr A4ZVZ3<br> A4ZVZ3_<br>SHEEP, tr <br>C6K2P4 C<br>6K2P4_SH<br>EEP | fIAV<br>GYV<br>DDT<br>QFV<br>R | 95% | 48.9 | 54.11446 | Ref | 0.033 | -1.3                                     | 0.93 | -0.26 | 1.1 | -1.1                                      | 1.1  | 257   | 266   | 112                                      | 603   | 290   | 661   | 144                                       | 699   | 967.5 | 1933   | 2 | 0.0113 | 5.86  |
| MHC class I antigen<br>OS=Ovis aries<br>GN=ovar PE=2 SV=1 | tr A4ZVZ3<br> A4ZVZ3_<br>SHEEP, tr <br>C6K2P4 C<br>6K2P4_SH<br>EEP | fIAV<br>GYV<br>DDT<br>QFV<br>R | 95% | 62.6 | 54.14925 | Ref | 0.045 | -1.8                                     | 0.98 | -0.22 | 1.2 | -1.4                                      | 1.1  | 585   | 652   | 201                                      | 1520  | 726   | 1720  | 297                                       | 1680  | 967.5 | 1933   | 2 | 0.0078 | 4.029 |
| MHC class I antigen<br>OS=Ovis aries<br>GN=ovar PE=2 SV=1 | tr A4ZVZ3<br> A4ZVZ3_<br>SHEEP, tr <br>C6K2P4 C<br>6K2P4_SH<br>EEP | fIAV<br>GYV<br>DDT<br>QFV<br>R | 95% | 51.9 | 54.14343 | Ref | 0.077 | -1.5                                     | 0.92 | -0.24 | 1.3 | -1.3                                      | 1.1  | 397   | 480   | 169                                      | 1050  | 516   | 1320  | 226                                       | 1160  | 967.5 | 1933   | 2 | 0.0106 | 5.477 |
| MHC class I antigen<br>OS=Ovis aries<br>GN=ovar PE=2 SV=1 | tr A4ZVZ3<br> A4ZVZ3_<br>SHEEP, tr <br>C6K2P4 C<br>6K2P4_SH<br>EEP | fIAV<br>GYV<br>DDT<br>QFV<br>R | 95% | 49.6 | 54.11686 | Ref | 0.22  | Value<br>Missi<br>ng (-<br>2.908<br>014) | 1    | -0.45 | 1.3 | Value<br>Missi<br>ng (-<br>3.081<br>9821) | 1.2  | 141   | 166   | Value<br>Missi<br>ng (-<br>2.908<br>014) | 357   | 140   | 412   | Value<br>Missi<br>ng (-<br>3.0819<br>821) | 402   | 967.5 | 1933   | 2 | 0.0066 | 3.398 |
| MHC class I antigen<br>OS=Ovis aries<br>GN=ovar PE=2 SV=1 | tr A4ZVZ3<br> A4ZVZ3_<br>SHEEP, tr <br>C6K2P4 C<br>6K2P4_SH<br>EEP | sWT<br>AAD<br>TAA<br>QITQ<br>R | 95% | 57.6 | 53.00041 | Ref | 0.64  | 0.062                                    | 0.14 | 0.18  | 0.8 | 7E-04                                     | 0.2  | 12800 | 15300 | 11100                                    | 13100 | 14900 | 20100 | 12000                                     | 13700 | 608.7 | 1822.9 | 3 | 0.0125 | 6.847 |
| MHC class I antigen<br>OS=Ovis aries<br>GN=ovar PE=2 SV=1 | tr A4ZVZ3<br> A4ZVZ3_<br>SHEEP, tr <br>C6K2P4 C<br>6K2P4_SH<br>EEP | sWT<br>AAD<br>TAA<br>QITQ<br>R | 95% | 65   | 53.01405 | Ref | 0.54  | -1.5                                     | 0.39 | 0.056 | 1.6 | -1.5                                      | 0.41 | 9100  | 10700 | 2790                                     | 11700 | 10300 | 25400 | 3210                                      | 11900 | 912.5 | 1822.9 | 2 | 0.0096 | 5.275 |

|                                                           |                                                                    |                                   |     |      |          |     |       |       |       |        |       |       |       |      |      |      |      |       |      |       |      |       |        |   |        |       |
|-----------------------------------------------------------|--------------------------------------------------------------------|-----------------------------------|-----|------|----------|-----|-------|-------|-------|--------|-------|-------|-------|------|------|------|------|-------|------|-------|------|-------|--------|---|--------|-------|
| MHC class I antigen<br>OS=Ovis aries<br>GN=ovar PE=2 SV=1 | tr A4ZVZ3<br> A4ZVZ3_<br>SHEEP, tr <br>C6K2P4 C<br>6K2P4_SH<br>EEP | wAA<br>LVVP<br>SGEE<br>QR         | 71% | 36.1 | 53.16503 | Ref | 0.31  | -0.3  | 0.32  | 0.6    | 0.58  | -0.27 | 0.17  | 9210 | 6270 | 4460 | 7700 | 10300 | 8860 | 5120  | 6920 | 873.5 | 1744.9 | 2 | 0.0083 | 4.737 |
| MHC class I antigen<br>OS=Ovis aries<br>GN=ovar PE=2 SV=1 | tr A4ZVZ3<br> A4ZVZ3_<br>SHEEP, tr <br>C6K2P4 C<br>6K2P4_SH<br>EEP | wVE<br>QEG<br>PEY<br>WDR          | 91% | 40.5 | 49.55496 | Ref | 0.43  | -1.2  | 0.95  | -0.79  | 1.2   | -0.94 | 1.1   | 1230 | 2380 | 829  | 4170 | 1370  | 4860 | 1120  | 4510 | 949.4 | 1896.9 | 2 | 0.0232 | 12.2  |
| MHC class I antigen<br>OS=Ovis aries<br>GN=ovar PE=2 SV=1 | tr A4ZVZ3<br> A4ZVZ3_<br>SHEEP, tr <br>C6K2P4 C<br>6K2P4_SH<br>EEP | yTcH<br>VQH<br>EGL<br>QEPL<br>TLR | 95% | 53.4 | 55.30998 | Ref | 0.61  | -0.33 | 0.54  | -0.031 | 0.78  | -0.12 | 0.55  | 3890 | 5160 | 2920 | 5980 | 4440  | 6830 | 3820  | 6030 | 670.4 | 2677.4 | 4 | 0.0187 | 6.975 |
| Galectin-1 OS=Ovis<br>aries PE=2 SV=1                     | tr Q6J275<br> Q6J275_<br>SHEEP                                     | dDN<br>NLcL<br>HFN<br>PR          | 94% | 42.7 | 49.14402 | Ref | -0.46 | 0.2   | -0.56 | -0.17  | -0.9  | 0.081 | -1.1  | 3870 | 2380 | 4090 | 2710 | 3910  | 2050 | 4240  | 1910 | 904.4 | 1806.8 | 2 | 0.0113 | 6.269 |
| Galectin-1 OS=Ovis<br>aries PE=2 SV=1                     | tr Q6J275<br> Q6J275_<br>SHEEP                                     | dDN<br>NLcL<br>HFN<br>PR          | 95% | 63.5 | 49.15062 | Ref | -0.31 | -0.05 | -0.39 | -0.29  | -0.29 | -0.22 | -0.48 | 5470 | 4800 | 6250 | 5560 | 6530  | 5710 | 6250  | 5210 | 603.3 | 1806.8 | 3 | 0.0122 | 6.748 |
| Galectin-1 OS=Ovis<br>aries PE=2 SV=1                     | tr Q6J275<br> Q6J275_<br>SHEEP                                     | fEAH<br>GDIN<br>TIVc<br>nSk       | 78% | 39.3 | 53.69943 | Ref | -0.45 | -0.1  | -0.74 | -0.25  | -0.47 | 0.22  | -0.84 | 8910 | 5730 | 7970 | 5720 | 8860  | 6630 | 11200 | 5340 | 768.4 | 2302.1 | 3 | 0.0165 | 7.175 |
| Galectin-1 OS=Ovis<br>aries PE=2 SV=1                     | tr Q6J275<br> Q6J275_<br>SHEEP                                     | fEAH<br>GDIN<br>TIVc<br>nSk       | 56% | 34   | 53.64219 | Ref | -0.34 | -0.04 | -0.64 | -0.3   | -0.61 | 0.22  | -0.66 | 6110 | 4830 | 6450 | 4770 | 6660  | 4670 | 8680  | 4700 | 768.4 | 2302.1 | 3 | 0.0187 | 8.126 |
| Galectin-1 OS=Ovis<br>aries PE=2 SV=1                     | tr Q6J275<br> Q6J275_<br>SHEEP                                     | fEAH<br>GDIN<br>TIVc<br>nSk       | 87% | 41.5 | 53.63847 | Ref | -0.42 | 7E-04 | -0.71 | -0.25  | -0.37 | 0.22  | -0.85 | 4620 | 3540 | 5150 | 3540 | 5360  | 4300 | 6750  | 3210 | 576.5 | 2302.1 | 4 | 0.0187 | 8.111 |

|                                    |                        |                                  |     |      |          |     |       |       |       |        |       |       |       |       |       |       |       |       |       |       |       |       |        |   |        |       |
|------------------------------------|------------------------|----------------------------------|-----|------|----------|-----|-------|-------|-------|--------|-------|-------|-------|-------|-------|-------|-------|-------|-------|-------|-------|-------|--------|---|--------|-------|
| Galectin-1 OS=Ovis aries PE=2 SV=1 | tr Q6J275 Q6J275_SHEEP | gEVA<br>ADAK                     | 56% | 32   | 51.65007 | Ref | -0.78 | 0.53  | -0.63 | -0.28  | -0.66 | -0    | -0.73 | 41100 | 25500 | 68500 | 34500 | 48500 | 32500 | 53600 | 32100 | 456.9 | 1367.8 | 3 | 0.024  | 17.57 |
| Galectin-1 OS=Ovis aries PE=2 SV=1 | tr Q6J275 Q6J275_SHEEP | gEVA<br>ADAK                     | 76% | 36.7 | 51.64992 | Ref | -0.89 | 0.22  | -0.64 | -0.48  | -0.48 | 0.2   | -0.69 | 36200 | 17100 | 40100 | 24700 | 30400 | 26700 | 44500 | 23800 | 456.9 | 1367.8 | 3 | 0.0237 | 17.35 |
| Galectin-1 OS=Ovis aries PE=2 SV=1 | tr Q6J275 Q6J275_SHEEP | gEVA<br>ADAK                     | 95% | 46.7 | 51.74135 | Ref | -0.41 | 0.37  | -0.83 | -0.3   | -0.65 | 0.06  | -1.2  | 40200 | 26000 | 48500 | 23700 | 37700 | 25800 | 44200 | 18400 | 684.9 | 1367.8 | 2 | 0.0036 | 2.653 |
| Galectin-1 OS=Ovis aries PE=2 SV=1 | tr Q6J275 Q6J275_SHEEP | INLE<br>AINY<br>LAA<br>GGD<br>Fk | 95% | 57.4 | 54.08789 | Ref | -0.52 | -0    | -0.6  | -0.25  | -0.73 | 0.21  | -0.61 | 1010  | 656   | 1020  | 753   | 1060  | 663   | 1330  | 751   | 773.1 | 2316.3 | 3 | 0.0126 | 5.453 |
| Galectin-1 OS=Ovis aries PE=2 SV=1 | tr Q6J275 Q6J275_SHEEP | INLE<br>AINY<br>LAA<br>GGD<br>Fk | 94% | 52.4 | 54.1255  | Ref | -1.1  | 0.27  | -0.56 | -0.077 | -0.79 | -0.04 | -0.9  | 311   | 109   | 305   | 194   | 298   | 159   | 278   | 152   | 773.1 | 2316.3 | 3 | 0.0145 | 6.242 |
| Galectin-1 OS=Ovis aries PE=2 SV=1 | tr Q6J275 Q6J275_SHEEP | INLE<br>AINY<br>LAA<br>GGD<br>Fk | 81% | 37.1 | 52.43666 | Ref | -0.28 | 0.051 | -0.62 | -0.28  | -0.8  | 0.22  | -1.1  | 3620  | 2570  | 3510  | 2470  | 3450  | 2100  | 4440  | 1770  | 656.1 | 2620.5 | 4 | 0.0026 | 0.975 |
| Galectin-1 OS=Ovis aries PE=2 SV=1 | tr Q6J275 Q6J275_SHEEP | IPDG<br>YEFK                     | 54% | 32.3 | 52.47123 | Ref | -0.6  | 0.33  | -1.2  | -0.2   | -0.85 | 0.37  | -1.3  | 74500 | 40500 | 83600 | 32500 | 71700 | 40000 | 97100 | 30100 | 788.9 | 1575.9 | 2 | 0.0156 | 9.892 |
| Galectin-1 OS=Ovis aries PE=2 SV=1 | tr Q6J275 Q6J275_SHEEP | sFSL<br>NLGk                     | 76% | 35.4 | 51.29799 | Ref | -0.46 | 0.18  | -0.63 | -0.23  | -0.8  | 0.1   | -0.99 | 21900 | 13500 | 22600 | 14600 | 21100 | 12400 | 24200 | 11300 | 737.4 | 1472.9 | 2 | 0.0221 | 14.97 |
| Galectin-1 OS=Ovis aries PE=2 SV=1 | tr Q6J275 Q6J275_SHEEP | sFSL<br>NLGk                     | 68% | 33.5 | 50.91087 | Ref | -0.36 | 0.29  | -1.1  | -0.26  | -0.75 | 0.22  | -1.4  | 74800 | 46300 | 79000 | 33900 | 66800 | 41300 | 84400 | 27200 | 492   | 1472.9 | 3 | 0.0146 | 9.93  |

|                                                         |                                          |                                            |     |      |          |     |       |      |      |      |      |      |      |       |       |       |        |        |       |       |        |       |        |   |        |       |
|---------------------------------------------------------|------------------------------------------|--------------------------------------------|-----|------|----------|-----|-------|------|------|------|------|------|------|-------|-------|-------|--------|--------|-------|-------|--------|-------|--------|---|--------|-------|
| Hemoglobin subunit alpha OS=Bos taurus GN=HBA PE=1 SV=2 | sp P01966 HBA_BOVIN,sp P01967 HBA1_BOSMU | aVEH<br>LDDL<br>PGAL<br>SELS<br>DLH<br>AHK | 92% | 44.4 | 55.36075 | Ref | 0.48  | 0.49 | 0.5  | 0.81 | 0.31 | 1.2  | 0.44 | 2370  | 2960  | 3210  | 3650   | 4960   | 3070  | 5930  | 3490   | 595.9 | 2974.6 | 5 | 0.0156 | 5.229 |
| Hemoglobin subunit alpha OS=Bos taurus GN=HBA PE=1 SV=2 | sp P01966 HBA_BOVIN,sp P01967 HBA1_BOSMU | aVEH<br>LDDL<br>PGAL<br>SELS<br>DLH<br>AHK | 82% | 40.7 | 55.46075 | Ref | 0.35  | 0.68 | 0.56 | 0.65 | 0.55 | 0.79 | 0.54 | 2180  | 1930  | 2610  | 2700   | 3170   | 2590  | 3200  | 2670   | 744.6 | 2974.6 | 4 | 0.0316 | 10.63 |
| Hemoglobin subunit alpha OS=Bos taurus GN=HBA PE=1 SV=2 | sp P01966 HBA_BOVIN,sp P01967 HBA1_BOSMU | aVEH<br>LDDL<br>PGAL<br>SELS<br>DLH<br>AHk | 89% | 41.3 | 55.30874 | Ref | 0.55  | 0.55 | 0.54 | 0.74 | 0.4  | 0.96 | 0.58 | 1690  | 2140  | 2320  | 2590   | 3260   | 2260  | 3470  | 2650   | 595.9 | 2974.6 | 5 | 0.0122 | 4.103 |
| Hemoglobin subunit alpha OS=Bos taurus GN=HBA PE=1 SV=2 | sp P01966 HBA_BOVIN,sp P01967 HBA1_BOSMU | IRVD<br>PVN<br>Fk                          | 63% | 30.4 | 50.54701 | Ref | 0.11  | 0.3  | 0.51 | 0.77 | 0.39 | 1    | 0.98 | 2480  | 2190  | 2720  | 3530   | 4640   | 3110  | 5110  | 4860   | 424.8 | 1695   | 4 | 0.0049 | 2.873 |
| Hemoglobin subunit alpha OS=Bos taurus GN=HBA PE=1 SV=2 | sp P01966 HBA_BOVIN,sp P01967 HBA1_BOSMU | mFLS<br>FPTT<br>k                          | 74% | 36.3 | 52.66653 | Ref | 0.17  | 0.86 | 0.56 | 0.82 | 0.32 | 1.1  | 0.35 | 4160  | 4220  | 7430  | 6770   | 8940   | 5510  | 9960  | 5810   | 840.5 | 1678.9 | 2 | 0.0172 | 10.23 |
| Hemoglobin subunit alpha OS=Bos taurus GN=HBA PE=1 SV=2 | sp P01966 HBA_BOVIN,sp P01967 HBA1_BOSMU | vAA<br>ALTK                                | 81% | 37.1 | 50.59473 | Ref | 0.041 | 0.74 | 0.49 | 0.87 | 0.32 | 1.1  | 0.47 | 77800 | 65200 | 1E+05 | 109000 | 156000 | 92800 | 2E+05 | 107000 | 427.9 | 1280.8 | 3 | 0.0131 | 10.2  |

|                                                         |                                          |                                 |     |      |          |     |       |      |      |      |      |      |      |       |       |       |        |        |       |       |        |       |        |   |        |       |
|---------------------------------------------------------|------------------------------------------|---------------------------------|-----|------|----------|-----|-------|------|------|------|------|------|------|-------|-------|-------|--------|--------|-------|-------|--------|-------|--------|---|--------|-------|
| Hemoglobin subunit alpha OS=Bos taurus GN=HBA PE=1 SV=2 | sp P01966 HBA_BOVIN,sp P01967 HBA1_BOSMU | vAA<br>ALTK                     | 81% | 37.4 | 50.58532 | Ref | -0.34 | 0.85 | 0.52 | 0.85 | 0.11 | 1.3  | 0.62 | 71500 | 50300 | 1E+05 | 111000 | 154000 | 80300 | 2E+05 | 119000 | 427.9 | 1280.8 | 3 | 0.0122 | 9.493 |
| Hemoglobin subunit alpha OS=Bos taurus GN=HBA PE=1 SV=2 | sp P01966 HBA_BOVIN,sp P01967 HBA1_BOSMU | vAA<br>ALTK                     | 51% | 29.9 | 50.57156 | Ref | 0.16  | 0.76 | 0.49 | 0.76 | 0.38 | 1.1  | 0.56 | 48400 | 47200 | 77800 | 72500  | 96500  | 64700 | 1E+05 | 75800  | 641.4 | 1280.8 | 2 | 0.0051 | 3.981 |
| Hemoglobin subunit alpha OS=Bos taurus GN=HBA PE=1 SV=2 | sp P01966 HBA_BOVIN,sp P01967 HBA1_BOSMU | vGG<br>HAA<br>EYG<br>AEAL<br>ER | 95% | 56   | 52.26984 | Ref | 0.053 | 0.69 | 0.56 | 0.8  | 0.34 | 1.2  | 0.51 | 4120  | 3810  | 6420  | 6590   | 8570   | 5450  | 10300 | 6370   | 917.5 | 1832.9 | 2 | 0.0149 | 8.112 |
| Hemoglobin subunit alpha OS=Bos taurus GN=HBA PE=1 SV=2 | sp P01966 HBA_BOVIN,sp P01967 HBA1_BOSMU | vGG<br>HAA<br>EYG<br>AEAL<br>ER | 95% | 58.5 | 52.27436 | Ref | 0.21  | 0.36 | 0.64 | 0.67 | 0.76 | 0.63 | 0.75 | 13900 | 10600 | 12800 | 17400  | 19500  | 18200 | 17300 | 18700  | 612   | 1832.9 | 3 | 0.0142 | 7.717 |
| Hemoglobin subunit alpha OS=Bos taurus GN=HBA PE=1 SV=2 | sp P01966 HBA_BOVIN,sp P01967 HBA1_BOSMU | vGG<br>HAA<br>EYG<br>AEAL<br>ER | 95% | 56.1 | 52.24957 | Ref | 0.67  | 0.67 | 0.5  | 0.73 | 0.56 | 0.75 | 0.71 | 14200 | 24700 | 26800 | 26800  | 34600  | 26900 | 31900 | 30900  | 612   | 1832.9 | 3 | 0.0138 | 7.521 |
| Hemoglobin subunit alpha OS=Bos taurus GN=HBA PE=1 SV=2 | sp P01966 HBA_BOVIN,sp P01967 HBA1_BOSMU | vGG<br>HAA<br>EYG<br>AEAL<br>ER | 95% | 52.1 | 52.29971 | Ref | 0.16  | 0.77 | 0.51 | 0.83 | 0.35 | 1    | 0.53 | 2840  | 2650  | 4400  | 4110   | 5680   | 3540  | 5960  | 4170   | 917.5 | 1832.9 | 2 | 0.0135 | 7.37  |

|                                                                           |                                                                                                                                                                                                     |                |     |      |          |     |       |       |       |        |      |       |       |       |       |       |       |       |       |       |       |       |        |   |        |       |
|---------------------------------------------------------------------------|-----------------------------------------------------------------------------------------------------------------------------------------------------------------------------------------------------|----------------|-----|------|----------|-----|-------|-------|-------|--------|------|-------|-------|-------|-------|-------|-------|-------|-------|-------|-------|-------|--------|---|--------|-------|
| Hemoglobin subunit alpha OS=Bos taurus GN=HBA PE=1 SV=2                   | sp P01966 HBA_BOVIN,sp P01967 HBA1_BOSMU                                                                                                                                                            | vGGHAAEYGAERAL | 89% | 43.5 | 52.32371 | Ref | 0.57  | 0.65  | 0.56  | 0.47   | 0.6  | 0.61  | 0.72  | 9010  | 9490  | 10900 | 11500 | 11900 | 11300 | 12000 | 12800 | 612   | 1832.9 | 3 | 0.0129 | 7.014 |
| Hemoglobin subunit alpha OS=Bos taurus GN=HBA PE=1 SV=2                   | sp P01966 HBA_BOVIN,sp P01967 HBA1_BOSMU                                                                                                                                                            | vGGHAAEYGAERAL | 61% | 35.1 | 54.08603 | Ref | 0.26  | 0.73  | 0.63  | 0.68   | 0.52 | 0.99  | 0.58  | 1070  | 1250  | 1880  | 1970  | 2250  | 1760  | 2530  | 1900  | 1070  | 2137.1 | 2 | 0.0166 | 7.754 |
| 10 kDa heat shock protein, mitochondrial OS=Bos taurus GN=HSPE1 PE=2 SV=2 | 3 CH10_BOVIN,sp P61604 CH10_HUMAN,tr B8ZZL8_HUMAN,tr D2HDI2 D2HDI2_AILME,tr E2QUS9 E2QUS9_CANFA,tr F6T494 CALJA,tr F6U6U2 F6U6U2_MACMU,tr F6U8E5 F6U8E5_ORNAN,tr F7B G90 F7B G90_MACMU,tr Q6WSP6 Q6 | gGIMLP         | 55% | 31.1 | 51.15887 | Ref | -0.26 | -0.16 | 0.003 | -0.067 | 0.2  | -0.37 | 0.049 | 32500 | 20600 | 23900 | 30000 | 31500 | 33100 | 23300 | 30900 | 726.9 | 1451.8 | 2 | 0.0268 | 18.46 |

|                                                                                    |                                                                                                                                                                                                                     |                  |     |      |          |     |        |       |       |       |      |       |       |       |       |       |       |       |       |       |       |       |        |   |        |       |
|------------------------------------------------------------------------------------|---------------------------------------------------------------------------------------------------------------------------------------------------------------------------------------------------------------------|------------------|-----|------|----------|-----|--------|-------|-------|-------|------|-------|-------|-------|-------|-------|-------|-------|-------|-------|-------|-------|--------|---|--------|-------|
| 10 kDa heat shock protein, mitochondrial<br>OS=Bos taurus<br>GN=HSPE1 PE=2<br>SV=2 | 3 CH10_BOVIN.sp P61604 C<br>H10_HUMAN,tr B8ZZL8 B8ZZL8_HUMAN,tr D2HDI2 D2HDI2_AILME,tr E2QUS9 E2QUS9_CANFA,tr F6T494 F6T494_CALIA,tr F6U6U2 F6U6U2_MACMU,tr F6U8E5 F6U8E5_ORNAN,tr F7BG90 F7BG90_MACMU,tr Q6WSP6 Q6 | gGI<br>MLP<br>Ek | 72% | 34.5 | 51.23028 | Ref | -0.083 | -0.05 | 0.004 | -0.13 | 0.33 | -0.44 | 0.055 | 16600 | 14700 | 16300 | 19000 | 19000 | 22900 | 14000 | 19600 | 726.9 | 1451.8 | 2 | 0.0274 | 18.89 |
|                                                                                    | 3 CH10_BOVIN.sp P61604 C<br>H10_HUMAN,tr B8ZZL8 B8ZZL8_HUMAN,tr D2HDI2 D2HDI2_AILME,tr E2QUS9 E2QUS9_CANFA,tr F6T494 F6T494_CALIA,tr F6U6U2 F6U6U2_MACMU,tr F6U8E5 F6U8E5_ORNAN,tr F7BG90 F7BG90_MACMU,tr Q6WSP6 Q6 | sAAE<br>TVTK     | 88% | 40.4 | 51.49662 | Ref | -0.12  | -0.04 | 0.065 | 0.017 | 0.23 | -0.66 | 0.063 | 22300 | 18100 | 20800 | 25100 | 26700 | 27100 | 15200 | 25000 | 707.9 | 1413.8 | 2 | 0.0248 | 17.5  |



|                                                                                    |                                                                                                                                                                                                                                                                                                                         |                    |     |      |          |     |       |       |       |        |      |       |       |       |       |       |       |       |       |       |       |     |      |   |        |       |
|------------------------------------------------------------------------------------|-------------------------------------------------------------------------------------------------------------------------------------------------------------------------------------------------------------------------------------------------------------------------------------------------------------------------|--------------------|-----|------|----------|-----|-------|-------|-------|--------|------|-------|-------|-------|-------|-------|-------|-------|-------|-------|-------|-----|------|---|--------|-------|
| 10 kDa heat shock protein, mitochondrial<br>OS=Bos taurus<br>GN=HSPE1 PE=2<br>SV=2 | 3 CH10_B<br>OVIN,sp <br>P61604 C<br>H10_HU<br>MAN,tr B<br>8ZZL8 B8<br>ZZL8_HU<br>MAN,tr D<br>2HDI2 D2<br>HDI2_AIL<br>ME,tr E2<br>QUS9 E2<br>QUS9_CA<br>NFA,tr F6<br>T494 F6T<br>494_CALJ<br>A,tr F6U6<br>U2 F6U6<br>U2_MAC<br>MU,tr F6<br>U8E5 F6U<br>8E5_ORN<br>AN,tr F7B<br>G90 F7B<br>G90_MAC<br>MU,tr Q6<br>WSP6 Q6 | VLLP<br>EYG<br>GTK | 88% | 40.2 | 51.65265 | Ref | -0.19 | -0.07 | 0.092 | -0.066 | 0.32 | -0.55 | 0.091 | 22800 | 18400 | 21800 | 27300 | 27000 | 30900 | 17600 | 27300 | 843 | 1684 | 2 | 0.0188 | 11.15 |
|                                                                                    | 3 CH10_B<br>OVIN,sp <br>P61604 C<br>H10_HU<br>MAN,tr B<br>8ZZL8 B8<br>ZZL8_HU<br>MAN,tr D<br>2HDI2 D2<br>HDI2_AIL<br>ME,tr E2<br>QUS9 E2<br>QUS9_CA<br>NFA,tr F6<br>T494 F6T<br>494_CALJ<br>A,tr F6U6<br>U2 F6U6<br>U2_MAC<br>MU,tr F6<br>U8E5 F6U<br>8E5_ORN<br>AN,tr F7B<br>G90 F7B<br>G90_MAC<br>MU,tr Q6<br>WSP6 Q6 | VLLP<br>EYG<br>GTK | 92% | 42.8 | 51.41914 | Ref | -0.17 | 0.007 | -0.02 | -0.063 | 0.37 | -0.58 | 0.11  | 9120  | 7730  | 9500  | 10500 | 11200 | 13200 | 7150  | 11400 | 843 | 1684 | 2 | 0.0135 | 8.024 |

|                                                                           |                                                                                                                                                            |                            |     |      |          |     |       |       |       |        |      |       |       |      |      |      |      |      |       |      |      |       |        |   |        |       |
|---------------------------------------------------------------------------|------------------------------------------------------------------------------------------------------------------------------------------------------------|----------------------------|-----|------|----------|-----|-------|-------|-------|--------|------|-------|-------|------|------|------|------|------|-------|------|------|-------|--------|---|--------|-------|
| 10 kDa heat shock protein, mitochondrial OS=Bos taurus GN=HSPE1 PE=2 SV=2 | 3 CH10_BOVIN.sp P61604 C                                                                                                                                   | vLQA<br>TVV<br>AVG<br>SGSk | 95% | 70.1 | 51.42933 | Ref | -0.26 | -0.37 | -0    | -0.23  | 0.38 | -0.36 | 0.25  | 7540 | 5160 | 5220 | 7540 | 7110 | 9430  | 5920 | 8960 | 642.1 | 1923.1 | 3 | 0.0256 | 13.32 |
|                                                                           | H10_HUMAN,tr B8ZZL8 B8ZZL8_HUMAN,tr D2HDI2 D2HDI2_AILME,tr E2QUS9 E2QUS9_CANFA,tr F6T494 F6T494_CALIA,tr F6U6U2 F6U6U2_MACMU,tr F6U8E5 F6U8E5_ORNAN,tr F7B |                            |     |      |          |     |       |       |       |        |      |       |       |      |      |      |      |      |       |      |      |       |        |   |        |       |
| 10 kDa heat shock protein, mitochondrial OS=Bos taurus GN=HSPE1 PE=2 SV=2 | G90 F7B                                                                                                                                                    | vLQA<br>TVV<br>AVG<br>SGSk | 95% | 69.8 | 51.17888 | Ref | -0.15 | 0.058 | -0.05 | -0.077 | 0.2  | -0.22 | -0.13 | 8730 | 6800 | 8490 | 8860 | 9570 | 10100 | 7910 | 8360 | 642.1 | 1923.1 | 3 | 0.0218 | 11.32 |
|                                                                           | G90 F7B<br>G90_MAC<br>MU,tr Q6<br>WSP6 Q6                                                                                                                  |                            |     |      |          |     |       |       |       |        |      |       |       |      |      |      |      |      |       |      |      |       |        |   |        |       |

|                                                                           |                                                                                                                                                                                                                                                                                                                         |                            |     |      |          |     |       |       |       |       |      |       |       |       |       |       |       |       |       |       |       |       |        |   |        |       |
|---------------------------------------------------------------------------|-------------------------------------------------------------------------------------------------------------------------------------------------------------------------------------------------------------------------------------------------------------------------------------------------------------------------|----------------------------|-----|------|----------|-----|-------|-------|-------|-------|------|-------|-------|-------|-------|-------|-------|-------|-------|-------|-------|-------|--------|---|--------|-------|
| 10 kDa heat shock protein, mitochondrial OS=Bos taurus GN=HSPE1 PE=2 SV=2 | 3 CH10_B<br>OVIN,sp <br>P61604 C<br>H10_HU<br>MAN,tr B<br>8ZZL8 B8<br>ZZL8_HU<br>MAN,tr D<br>2HDI2 D2<br>HDI2_AIL<br>ME,tr E2<br>QUS9 E2<br>QUS9_CA<br>NFA,tr F6<br>T494 F6T<br>494_CALJ<br>A,tr F6U6<br>U2 F6U6<br>U2_MAC<br>MU,tr F6<br>U8E5 F6U<br>8E5_ORN<br>AN,tr F7B<br>G90 F7B<br>G90_MAC<br>MU,tr Q6<br>WSP6 Q6 | VLQA<br>TVV<br>AVG<br>SGSk | 95% | 57   | 51.07329 | Ref | 0.3   | -0.33 | 0.01  | -0.14 | 0.2  | -0.52 | -0.05 | 8190  | 8390  | 5880  | 8370  | 8300  | 9160  | 5820  | 8010  | 642.1 | 1923.1 | 3 | 0.0203 | 10.56 |
|                                                                           | 3 CH10_B<br>OVIN,sp <br>P61604 C<br>H10_HU<br>MAN,tr B<br>8ZZL8 B8<br>ZZL8_HU<br>MAN,tr D<br>2HDI2 D2<br>HDI2_AIL<br>ME,tr E2<br>QUS9 E2<br>QUS9_CA<br>NFA,tr F6<br>T494 F6T<br>494_CALJ<br>A,tr F6U6<br>U2 F6U6<br>U2_MAC<br>MU,tr F6<br>U8E5 F6U<br>8E5_ORN<br>AN,tr F7B<br>G90 F7B<br>G90_MAC<br>MU,tr Q6<br>WSP6 Q6 | VLQA<br>TVV<br>AVG<br>SGSk | 95% | 73.1 | 50.96093 | Ref | -0.39 | -0.71 | 0.094 | 0.074 | 0.38 | -0.6  | 0.35  | 21700 | 13500 | 11800 | 23100 | 25100 | 27200 | 14300 | 27500 | 642.1 | 1923.1 | 3 | 0.0176 | 9.124 |

|                                                                                    |                                                                                                                                                                                                                                                                                                                         |                            |     |      |          |     |        |       |      |       |       |       |       |       |      |      |       |      |       |      |       |       |        |   |        |       |
|------------------------------------------------------------------------------------|-------------------------------------------------------------------------------------------------------------------------------------------------------------------------------------------------------------------------------------------------------------------------------------------------------------------------|----------------------------|-----|------|----------|-----|--------|-------|------|-------|-------|-------|-------|-------|------|------|-------|------|-------|------|-------|-------|--------|---|--------|-------|
| 10 kDa heat shock protein, mitochondrial<br>OS=Bos taurus<br>GN=HSPE1 PE=2<br>SV=2 | 3 CH10_B<br>OVIN,sp <br>P61604 C<br>H10_HU<br>MAN,tr B<br>8ZZL8 B8<br>ZZL8_HU<br>MAN,tr D<br>2HDI2 D2<br>HDI2_AIL<br>ME,tr E2<br>QUS9 E2<br>QUS9_CA<br>NFA,tr F6<br>T494 F6T<br>494_CALJ<br>A,tr F6U6<br>U2 F6U6<br>U2_MAC<br>MU,tr F6<br>U8E5 F6U<br>8E5_ORN<br>AN,tr F7B<br>G90 F7B<br>G90_MAC<br>MU,tr Q6<br>WSP6 Q6 | VLQA<br>TVV<br>AVG<br>SGSK | 95% | 69   | 50.90614 | Ref | -0.02  | -0.07 | 0.12 | -0.31 | 0.098 | -0.32 | 0.033 | 10700 | 8590 | 8980 | 11500 | 9420 | 10900 | 8530 | 10800 | 642.1 | 1923.1 | 3 | 0.0157 | 8.173 |
|                                                                                    | 3 CH10_B<br>OVIN,sp <br>P61604 C<br>H10_HU<br>MAN,tr B<br>8ZZL8 B8<br>ZZL8_HU<br>MAN,tr D<br>2HDI2 D2<br>HDI2_AIL<br>ME,tr E2<br>QUS9 E2<br>QUS9_CA<br>NFA,tr F6<br>T494 F6T<br>494_CALJ<br>A,tr F6U6<br>U2 F6U6<br>U2_MAC<br>MU,tr F6<br>U8E5 F6U<br>8E5_ORN<br>AN,tr F7B<br>G90 F7B<br>G90_MAC<br>MU,tr Q6<br>WSP6 Q6 | VLQA<br>TVV<br>AVG<br>SGSK | 95% | 72.7 | 50.74077 | Ref | -0.097 | -0.33 | 0.13 | -0.24 | 0.36  | -0.59 | 0.19  | 7410  | 5890 | 5440 | 8380  | 7170 | 9490  | 5110 | 8750  | 642.1 | 1923.1 | 3 | 0.0141 | 7.316 |

|                                                                                    |                                                                                                                                                                                                                                                                                                                         |                            |     |      |          |     |        |       |       |       |       |       |       |      |      |      |      |      |      |      |      |       |        |   |        |       |
|------------------------------------------------------------------------------------|-------------------------------------------------------------------------------------------------------------------------------------------------------------------------------------------------------------------------------------------------------------------------------------------------------------------------|----------------------------|-----|------|----------|-----|--------|-------|-------|-------|-------|-------|-------|------|------|------|------|------|------|------|------|-------|--------|---|--------|-------|
| 10 kDa heat shock protein, mitochondrial<br>OS=Bos taurus<br>GN=HSPE1 PE=2<br>SV=2 | 3 CH10_B<br>OVIN.sp <br>P61604 C<br>H10_HU<br>MAN,tr B<br>8ZZL8 B8<br>ZZL8_HU<br>MAN,tr D<br>2HDI2 D2<br>HDI2_AIL<br>ME,tr E2<br>QUS9 E2<br>QUS9_CA<br>NFA,tr F6<br>T494 F6T<br>494_CALJ<br>A,tr F6U6<br>U2 F6U6<br>U2_MAC<br>MU,tr F6<br>U8E5 F6U<br>8E5_ORN<br>AN,tr F7B<br>G90 F7B<br>G90_MAC<br>MU,tr Q6<br>WSP6 Q6 | VLQA<br>TVV<br>AVG<br>SGSk | 95% | 79.7 | 50.32562 | Ref | -0.1   | -0.22 | 0.024 | -0.22 | 0.28  | -0.29 | 0.15  | 2870 | 2390 | 2380 | 3180 | 2970 | 3650 | 2570 | 3470 | 962.6 | 1923.2 | 2 | 0.0075 | 3.919 |
|                                                                                    | 3 CH10_B<br>OVIN.sp <br>P61604 C<br>H10_HU<br>MAN,tr B<br>8ZZL8 B8<br>ZZL8_HU<br>MAN,tr D<br>2HDI2 D2<br>HDI2_AIL<br>ME,tr E2<br>QUS9 E2<br>QUS9_CA<br>NFA,tr F6<br>T494 F6T<br>494_CALJ<br>A,tr F6U6<br>U2 F6U6<br>U2_MAC<br>MU,tr F6<br>U8E5 F6U<br>8E5_ORN<br>AN,tr F7B<br>G90 F7B<br>G90_MAC<br>MU,tr Q6<br>WSP6 Q6 | VLQA<br>TVV<br>AVG<br>SGSk | 95% | 58.8 | 50.97178 | Ref | -0.099 | -0.16 | 0.071 | -0.09 | 0.046 | -0.08 | 0.005 | 8880 | 7270 | 7560 | 9960 | 9830 | 9430 | 9000 | 9490 | 642.1 | 1923.1 | 3 | 0.0174 | 9.031 |

|                                                                           |                                                                                                                                                                                                                   |                     |     |      |          |     |       |       |       |        |       |       |       |       |       |       |       |       |       |       |       |       |        |   |        |       |
|---------------------------------------------------------------------------|-------------------------------------------------------------------------------------------------------------------------------------------------------------------------------------------------------------------|---------------------|-----|------|----------|-----|-------|-------|-------|--------|-------|-------|-------|-------|-------|-------|-------|-------|-------|-------|-------|-------|--------|---|--------|-------|
| 10 kDa heat shock protein, mitochondrial OS=Bos taurus GN=HSPE1 PE=2 SV=2 | 3 CH10_BOVIN.sp P61604 C<br>H10_HUMAN,tr B8ZZL8 B8ZZL8_HUMAN,tr D2HDI2 D2HDI2_AILME,tr E2QUS9 E2QUS9_CANFA,tr F6T494 F6T494_CALIA,tr F6U6U2 F6U6U2_MACMU,tr F6U8E5 F6U8E5_ORNAN,tr F7B90 F7B90_MACMU,tr Q6WSP6 Q6 | vLQA<br>TVV<br>AVG  | 95% | 75.2 | 50.74077 | Ref | -0.16 | -0.02 | 0.11  | -0.27  | 0.2   | -0.41 | 0.19  | 5880  | 4780  | 5720  | 7030  | 5960  | 7170  | 4910  | 7430  | 642.1 | 1923.1 | 3 | 0.0139 | 7.222 |
| Prelamin-A/C OS=Homo sapiens GN=LMNA PE=1 SV=1                            | 5 LMNA_HUMAN,sp P48678 LMNA_MOUSE,tr A5A6M1 A5A6M1_PANTR,tr B3RH23 B3RH23_MOUSE,tr B3RH24 B3RH24_MOUSE,tr F1MYG5 F1MYG5_BOVIN,tr F1PBJ3 F1PBJ3_CANFA,tr F6ZY40 F6ZY40_HORSE,tr F7GLE9 F7GLE9_MACMU,tr Q3SZI2 Q3S  | aAYE<br>AELG<br>DAR | 93% | 43.6 | 50.92075 | Ref | -0.3  | -0.42 | -0.68 | -0.075 | -0.52 | -0.48 | -0.41 | 66600 | 49500 | 49500 | 46400 | 77700 | 49800 | 53700 | 55700 | 735.4 | 1468.7 | 2 | 0.0107 | 7.296 |

|                                                         |                                                                                                                                                                                                                                                                                                                          |                    |     |      |          |     |       |       |       |       |       |       |       |       |       |       |       |       |       |       |       |       |        |   |        |       |
|---------------------------------------------------------|--------------------------------------------------------------------------------------------------------------------------------------------------------------------------------------------------------------------------------------------------------------------------------------------------------------------------|--------------------|-----|------|----------|-----|-------|-------|-------|-------|-------|-------|-------|-------|-------|-------|-------|-------|-------|-------|-------|-------|--------|---|--------|-------|
| Prelamin-A/C<br>OS=Homo sapiens<br>GN=LMNA PE=1<br>SV=1 | 5 LMNA_<br>HUMAN,s<br>p P48678<br> LMNA_<br>MOUSE,tr<br> A5A6M1<br> A5A6M1<br>_PANTR,tr<br> B3RH23 <br>B3RH23_<br>MOUSE,tr<br> B3RH24 <br>B3RH24_<br>MOUSE,tr<br> F1MYG5<br> F1MYG5<br>_BOVIN,tr<br> F1PBJ3 <br>F1PBJ3_C<br>ANFA,tr F<br>6ZY40 F6<br>ZY40_HO<br>RSE,tr F7<br>GLE9 F7G<br>LE9_MAC<br>MU,tr Q3<br>SZ12 Q3S | ITESE<br>EVVS<br>R | 72% | 35   | 51.77779 | Ref | -0.22 | -0.29 | -0.75 | -0.21 | -0.53 | -0.44 | -0.56 | 86800 | 64900 | 66900 | 54700 | 87800 | 61400 | 67900 | 62400 | 726.9 | 1451.8 | 2 | 0.0141 | 9.725 |
| Prelamin-A/C<br>OS=Homo sapiens<br>GN=LMNA PE=1<br>SV=1 | 5 LMNA_<br>HUMAN,s<br>p P48678<br> LMNA_<br>MOUSE,tr<br> A5A6M1<br> A5A6M1<br>_PANTR,tr<br> B3RH23 <br>B3RH23_<br>MOUSE,tr<br> B3RH24 <br>B3RH24_<br>MOUSE,tr<br> F1MYG5<br> F1MYG5<br>_BOVIN,tr<br> F1PBJ3 <br>F1PBJ3_C<br>ANFA,tr F<br>6ZY40 F6<br>ZY40_HO<br>RSE,tr F7<br>GLE9 F7G<br>LE9_MAC<br>MU,tr Q3<br>SZ12 Q3S | IADA<br>LQEL<br>R  | 56% | 32.6 | 52.43222 | Ref | -0.39 | -0.47 | -0.64 | -0.22 | -0.5  | -0.37 | -0.27 | 27400 | 19200 | 19800 | 19700 | 29000 | 20800 | 23800 | 25300 | 666.9 | 1331.8 | 2 | 0.0111 | 8.321 |

|                                                         |                                                                                                                                                                                                                                       |                         |     |      |          |     |        |       |       |       |       |       |       |      |      |      |      |       |      |      |      |     |        |   |        |       |
|---------------------------------------------------------|---------------------------------------------------------------------------------------------------------------------------------------------------------------------------------------------------------------------------------------|-------------------------|-----|------|----------|-----|--------|-------|-------|-------|-------|-------|-------|------|------|------|------|-------|------|------|------|-----|--------|---|--------|-------|
| Prelamin-A/C<br>OS=Homo sapiens<br>GN=LMNA PE=1<br>SV=1 | 5 LMNA_ HUMAN,s p P48678  LMNA_ MOUSE,tr  A5A6M1  A5A6M1 _PANTR,tr  B3RH23  B3RH23_ MOUSE,tr  B3RH24  B3RH24_ MOUSE,tr  F1MYG5  F1MYG5 _BOVIN,tr  F1PBJ3  F1PBJ3_C ANFA,tr F6ZY40 F6ZY40_HO RSE,tr F7GLE9 F7GLE9_MAC MU,tr Q3SZI2 Q3S | IALD<br>MEI<br>HAY<br>R | 86% | 41.8 | 52.67341 | Ref | -0.32  | -0.53 | -0.63 | -0.11 | -0.6  | -0.42 | -0.41 | 9640 | 6620 | 6210 | 6490 | 10300 | 6380 | 7540 | 7530 | 546 | 1634.9 | 3 | 0.0136 | 8.284 |
| Prelamin-A/C<br>OS=Homo sapiens<br>GN=LMNA PE=1<br>SV=1 | 5 LMNA_ HUMAN,s p P48678  LMNA_ MOUSE,tr  A5A6M1  A5A6M1 _PANTR,tr  B3RH23  B3RH23_ MOUSE,tr  B3RH24  B3RH24_ MOUSE,tr  F1MYG5  F1MYG5 _BOVIN,tr  F1PBJ3  F1PBJ3_C ANFA,tr F6ZY40 F6ZY40_HO RSE,tr F7GLE9 F7GLE9_MAC MU,tr Q3SZI2 Q3S | IALD<br>MEI<br>HAY<br>R | 91% | 46.4 | 52.68272 | Ref | -0.096 | -0.41 | -0.48 | -0.32 | -0.52 | -0.48 | -0.5  | 5950 | 5290 | 4620 | 4940 | 6090  | 4620 | 4960 | 4860 | 546 | 1634.9 | 3 | 0.0148 | 9.055 |



|                                                         |                                                                                                                                                                                                                                                                                                                          |                   |     |      |          |     |       |       |       |       |       |       |       |       |       |       |       |       |       |       |       |     |        |   |        |       |
|---------------------------------------------------------|--------------------------------------------------------------------------------------------------------------------------------------------------------------------------------------------------------------------------------------------------------------------------------------------------------------------------|-------------------|-----|------|----------|-----|-------|-------|-------|-------|-------|-------|-------|-------|-------|-------|-------|-------|-------|-------|-------|-----|--------|---|--------|-------|
| Prelamin-A/C<br>OS=Homo sapiens<br>GN=LMNA PE=1<br>SV=1 | 5 LMNA_<br>HUMAN,s<br>p P48678<br> LMNA_<br>MOUSE,tr<br> A5A6M1<br> A5A6M1<br>_PANTR,tr<br> B3RH23 <br>B3RH23_<br>MOUSE,tr<br> B3RH24 <br>B3RH24_<br>MOUSE,tr<br> F1MYG5<br> F1MYG5<br>_BOVIN,tr<br> F1PBJ3 <br>F1PBJ3_C<br>ANFA,tr F<br>6ZY40 F6<br>ZY40_HO<br>RSE,tr F7<br>GLE9 F7G<br>LE9_MAC<br>MU,tr Q3<br>SZ12 Q3S | IEAA<br>LGEA<br>k | 95% | 49.4 | 51.02471 | Ref | -0.26 | -0.54 | -0.77 | -0.17 | -0.52 | -0.4  | -0.54 | 52400 | 34200 | 30600 | 29300 | 48900 | 33500 | 38100 | 34300 | 504 | 1508.9 | 3 | 0.0087 | 5.738 |
| Prelamin-A/C<br>OS=Homo sapiens<br>GN=LMNA PE=1<br>SV=1 | 5 LMNA_<br>HUMAN,s<br>p P48678<br> LMNA_<br>MOUSE,tr<br> A5A6M1<br> A5A6M1<br>_PANTR,tr<br> B3RH23 <br>B3RH23_<br>MOUSE,tr<br> B3RH24 <br>B3RH24_<br>MOUSE,tr<br> F1MYG5<br> F1MYG5<br>_BOVIN,tr<br> F1PBJ3 <br>F1PBJ3_C<br>ANFA,tr F<br>6ZY40 F6<br>ZY40_HO<br>RSE,tr F7<br>GLE9 F7G<br>LE9_MAC<br>MU,tr Q3<br>SZ12 Q3S | IEAA<br>LGEA<br>k | 91% | 44.7 | 50.98062 | Ref | -0.33 | -0.31 | -0.8  | -0.4  | -0.56 | -0.41 | -0.35 | 9240  | 5850  | 6440  | 5150  | 7460  | 5830  | 6760  | 6990  | 504 | 1508.9 | 3 | 0.0049 | 3.254 |

|                                                         |                                                                                                                                                                                                                                       |              |     |     |      |          |     |       |       |       |       |       |       |       |       |       |       |       |       |       |       |       |       |        |   |        |       |
|---------------------------------------------------------|---------------------------------------------------------------------------------------------------------------------------------------------------------------------------------------------------------------------------------------|--------------|-----|-----|------|----------|-----|-------|-------|-------|-------|-------|-------|-------|-------|-------|-------|-------|-------|-------|-------|-------|-------|--------|---|--------|-------|
| Prelamin-A/C<br>OS=Homo sapiens<br>GN=LMNA PE=1<br>SV=1 | 5 LMNA_ HUMAN,s p P48678  LMNA_ MOUSE,tr  A5A6M1  A5A6M1 _PANTR,tr  B3RH23  B3RH23_ MOUSE,tr  B3RH24  B3RH24_ MOUSE,tr  F1MYG5  F1MYG5 _BOVIN,tr  F1PBJ3  F1PBJ3_C ANFA,tr F6ZY40 F6ZY40_HO RSE,tr F7GLE9 F7GLE9_MAC MU,tr Q3SZI2 Q3S | IRDLEDSL     | AR  | 89% | 44.1 | 52.7434  | Ref | -0.19 | -0.25 | -0.21 | -0.35 | -0.69 | -0.52 | -0.47 | 5060  | 4620  | 4810  | 5540  | 5550  | 3810  | 4490  | 4620  | 498   | 1490.8 | 3 | 0.007  | 4.692 |
| Prelamin-A/C<br>OS=Homo sapiens<br>GN=LMNA PE=1<br>SV=1 | 5 LMNA_ HUMAN,s p P48678  LMNA_ MOUSE,tr  A5A6M1  A5A6M1 _PANTR,tr  B3RH23  B3RH23_ MOUSE,tr  B3RH24  B3RH24_ MOUSE,tr  F1MYG5  F1MYG5 _BOVIN,tr  F1PBJ3  F1PBJ3_C ANFA,tr F6ZY40 F6ZY40_HO RSE,tr F7GLE9 F7GLE9_MAC MU,tr Q3SZI2 Q3S | SGA QAS STPL | SPT | 95% | 60.3 | 52.82982 | Ref | -0.38 | -0.4  | -1.1  | -0.15 | -0.48 | -0.48 | -0.28 | 27500 | 17100 | 18400 | 13100 | 27000 | 18800 | 19600 | 22300 | 832.4 | 1662.9 | 2 | 0.0111 | 6.661 |

|                                                         |                                                                                                                                                                                                                                                                                                                          |                                |     |    |          |     |       |       |       |       |       |       |       |       |       |       |       |       |       |       |       |       |        |   |        |       |
|---------------------------------------------------------|--------------------------------------------------------------------------------------------------------------------------------------------------------------------------------------------------------------------------------------------------------------------------------------------------------------------------|--------------------------------|-----|----|----------|-----|-------|-------|-------|-------|-------|-------|-------|-------|-------|-------|-------|-------|-------|-------|-------|-------|--------|---|--------|-------|
| Prelamin-A/C<br>OS=Homo sapiens<br>GN=LMNA PE=1<br>SV=1 | 5 LMNA_<br>HUMAN,s<br>p P48678<br> LMNA_<br>MOUSE,tr<br> A5A6M1<br> A5A6M1<br>_PANTR,tr<br> B3RH23 <br>B3RH23_<br>MOUSE,tr<br> B3RH24 <br>B3RH24_<br>MOUSE,tr<br> F1MYG5<br> F1MYG5<br>_BOVIN,tr<br> F1PBJ3 <br>F1PBJ3_C<br>ANFA,tr F<br>6ZY40 F6<br>ZY40_HO<br>RSE,tr F7<br>GLE9 F7G<br>LE9_MAC<br>MU,tr Q3<br>SZI2 Q3S | tALI<br>NST<br>GEE<br>VAM<br>R | 94% | 47 | 53.01397 | Ref | -0.43 | -0.21 | -0.78 | -0.21 | -0.59 | -0.4  | -0.34 | 5190  | 3440  | 4340  | 3280  | 5350  | 3610  | 4290  | 4440  | 898.5 | 1794.9 | 2 | 0.0137 | 7.603 |
| Prelamin-A/C<br>OS=Homo sapiens<br>GN=LMNA PE=1<br>SV=1 | 5 LMNA_<br>HUMAN,s<br>p P48678<br> LMNA_<br>MOUSE,tr<br> A5A6M1<br> A5A6M1<br>_PANTR,tr<br> B3RH23 <br>B3RH23_<br>MOUSE,tr<br> B3RH24 <br>B3RH24_<br>MOUSE,tr<br> F1MYG5<br> F1MYG5<br>_BOVIN,tr<br> F1PBJ3 <br>F1PBJ3_C<br>ANFA,tr F<br>6ZY40 F6<br>ZY40_HO<br>RSE,tr F7<br>GLE9 F7G<br>LE9_MAC<br>MU,tr Q3<br>SZI2 Q3S | tLDS<br>VAK                    | 60% | 31 | 50.3387  | Ref | -0.29 | -0.52 | -0.59 | -0.19 | -0.56 | -0.41 | -0.46 | 45900 | 31500 | 29000 | 31000 | 45400 | 30700 | 35500 | 33900 | 671.4 | 1340.8 | 2 | 0.0016 | 1.166 |

|                                                         |                                                                                                                                                                                                                                                                                                                          |                     |     |      |          |     |       |       |       |       |       |       |       |       |       |       |       |       |       |       |       |       |        |   |        |       |
|---------------------------------------------------------|--------------------------------------------------------------------------------------------------------------------------------------------------------------------------------------------------------------------------------------------------------------------------------------------------------------------------|---------------------|-----|------|----------|-----|-------|-------|-------|-------|-------|-------|-------|-------|-------|-------|-------|-------|-------|-------|-------|-------|--------|---|--------|-------|
| Prelamin-A/C<br>OS=Homo sapiens<br>GN=LMNA PE=1<br>SV=1 | 5 LMNA_<br>HUMAN,s<br>p P48678<br> LMNA_<br>MOUSE,tr<br> A5A6M1<br> A5A6M1<br>_PANTR,tr<br> B3RH23 <br>B3RH23_<br>MOUSE,tr<br> B3RH24 <br>B3RH24_<br>MOUSE,tr<br> F1MYG5<br> F1MYG5<br>_BOVIN,tr<br> F1PBJ3 <br>F1PBJ3_C<br>ANFA,tr F<br>6ZY40 F6<br>ZY40_HO<br>RSE,tr F7<br>GLE9 F7G<br>LE9_MAC<br>MU,tr Q3<br>SZI2 Q3S | tLEG<br>ELHD<br>LR  | 95% | 64.4 | 52.39985 | Ref | -0.29 | -0.37 | -0.65 | -0.31 | -0.45 | -0.33 | -0.51 | 23000 | 16600 | 17000 | 15800 | 22000 | 17400 | 19800 | 17400 | 496.3 | 1485.8 | 3 | 0.0117 | 7.883 |
| Prelamin-A/C<br>OS=Homo sapiens<br>GN=LMNA PE=1<br>SV=1 | 5 LMNA_<br>HUMAN,s<br>p P48678<br> LMNA_<br>MOUSE,tr<br> A5A6M1<br> A5A6M1<br>_PANTR,tr<br> B3RH23 <br>B3RH23_<br>MOUSE,tr<br> B3RH24 <br>B3RH24_<br>MOUSE,tr<br> F1MYG5<br> F1MYG5<br>_BOVIN,tr<br> F1PBJ3 <br>F1PBJ3_C<br>ANFA,tr F<br>6ZY40 F6<br>ZY40_HO<br>RSE,tr F7<br>GLE9 F7G<br>LE9_MAC<br>MU,tr Q3<br>SZI2 Q3S | vAVE<br>EVDE<br>EGk | 95% | 53.4 | 53.88953 | Ref | -0.19 | -0.43 | -0.81 | -0.26 | -0.66 | -0.45 | -0.72 | 29800 | 18300 | 16800 | 14500 | 23400 | 15400 | 18700 | 15300 | 906.5 | 1811   | 2 | 0.0112 | 6.182 |

|                                                           |                                                                                                                                                                    |                           |     |      |          |     |       |       |       |       |       |       |       |       |       |      |       |       |      |       |      |       |        |   |        |       |
|-----------------------------------------------------------|--------------------------------------------------------------------------------------------------------------------------------------------------------------------|---------------------------|-----|------|----------|-----|-------|-------|-------|-------|-------|-------|-------|-------|-------|------|-------|-------|------|-------|------|-------|--------|---|--------|-------|
| Endoplasmin<br>OS=Mus musculus<br>GN=Hsp90b1 PE=1<br>SV=2 | sp P08113 ENPL_MOUSE,s<br>p Q66HD0 ENPL_RAT,sp Q95M18 ENPL_BOVIN,tr F1MZ62 F1MZ62_BOVIN,tr Q3UAD6 Q3UAD6_MOUSE,tr Q3UBU0 Q3UBU0_MOUSE,SE,tr Q91V38 Q91V38_MOUSE,SE | dIST<br>NY<br>ASQ<br>k    | 95% | 51.5 | 53.45017 | Ref | -0.3  | -0.09 | -0.11 | -0.15 | -0.12 | -0.29 | -0.37 | 9920  | 7060  | 8840 | 9780  | 10500 | 9350 | 8720  | 8180 | 949.5 | 1897   | 2 | 0.014  | 7.384 |
| Endoplasmin<br>OS=Mus musculus<br>GN=Hsp90b1 PE=1<br>SV=2 | sp P08113 ENPL_MOUSE,s<br>p Q66HD0 ENPL_RAT,sp Q95M18 ENPL_BOVIN,tr F1MZ62 F1MZ62_BOVIN,tr Q3UAD6 Q3UAD6_MOUSE,tr Q3UBU0 Q3UBU0_MOUSE,SE,tr Q91V38 Q91V38_MOUSE,SE | eEAS<br>DYLE<br>LDTI<br>k | 83% | 41.8 | 54.22795 | Ref | 0.032 | -0.25 | -0.01 | -0.21 | -0.46 | -0.17 | -0.54 | 12100 | 10200 | 9100 | 12100 | 11600 | 8510 | 10900 | 8330 | 712   | 2133.1 | 3 | 0.0094 | 4.424 |

|                                                                     |                                                                                                                                                                            |                      |            |             |                 |            |             |              |              |             |              |              |              |              |              |              |              |              |              |              |              |              |               |          |               |              |
|---------------------------------------------------------------------|----------------------------------------------------------------------------------------------------------------------------------------------------------------------------|----------------------|------------|-------------|-----------------|------------|-------------|--------------|--------------|-------------|--------------|--------------|--------------|--------------|--------------|--------------|--------------|--------------|--------------|--------------|--------------|--------------|---------------|----------|---------------|--------------|
| <p>Endoplasmin<br/>OS=Mus musculus<br/>GN=Hsp90b1 PE=1<br/>SV=2</p> | <p>sp P08113 ENPL_MOUSE,s<br/>p Q66HD0 ENPL_RAT,sp Q95M18 ENPL_BOVIN,tr F1MZ62 F1MZ62_BOVIN,tr Q3UAD6 Q3UAD6_MOUSE,tr Q3UBU0 Q3UBU0_MOUSE,SE,tr Q91V38 Q91V38_MOUSE,SE</p> | <p>eVEE<br/>DEYK</p> | <p>50%</p> | <p>31.5</p> | <p>52.08549</p> | <p>Ref</p> | <p>0.12</p> | <p>-0.38</p> | <p>-0.16</p> | <p>-0.2</p> | <p>-0.45</p> | <p>-0.03</p> | <p>-0.53</p> | <p>57900</p> | <p>51800</p> | <p>39900</p> | <p>52100</p> | <p>55800</p> | <p>40800</p> | <p>57100</p> | <p>40200</p> | <p>550.3</p> | <p>1647.8</p> | <p>3</p> | <p>0.0103</p> | <p>6.257</p> |
| <p>Endoplasmin<br/>OS=Mus musculus<br/>GN=Hsp90b1 PE=1<br/>SV=2</p> | <p>sp P08113 ENPL_MOUSE,s<br/>p Q66HD0 ENPL_RAT,sp Q95M18 ENPL_BOVIN,tr F1MZ62 F1MZ62_BOVIN,tr Q3UAD6 Q3UAD6_MOUSE,tr Q3UBU0 Q3UBU0_MOUSE,SE,tr Q91V38 Q91V38_MOUSE,SE</p> | <p>eVEE<br/>DEYK</p> | <p>64%</p> | <p>33.6</p> | <p>52.1459</p>  | <p>Ref</p> | <p>0.22</p> | <p>-0.22</p> | <p>-0.15</p> | <p>-0.3</p> | <p>-0.63</p> | <p>-0.11</p> | <p>-0.74</p> | <p>33400</p> | <p>28900</p> | <p>23100</p> | <p>27200</p> | <p>26900</p> | <p>18800</p> | <p>28100</p> | <p>18000</p> | <p>824.9</p> | <p>1647.8</p> | <p>2</p> | <p>0.0084</p> | <p>5.095</p> |

|                                                           |                                                                                                                                                                 |                                |     |    |          |     |      |       |       |       |       |       |       |       |       |       |       |       |       |       |       |       |        |   |        |       |
|-----------------------------------------------------------|-----------------------------------------------------------------------------------------------------------------------------------------------------------------|--------------------------------|-----|----|----------|-----|------|-------|-------|-------|-------|-------|-------|-------|-------|-------|-------|-------|-------|-------|-------|-------|--------|---|--------|-------|
| Endoplasmin<br>OS=Mus musculus<br>GN=Hsp90b1 PE=1<br>SV=2 | sp P08113 ENPL_MOUSE,s<br>p Q66HD0 ENPL_RAT,sp Q95M18 ENPL_BOVIN,tr F1MZ62 F1MZ62_BOVIN,tr Q3UAD6 Q3UAD6_MOUSE,tr Q3UBU0 Q3UBU0_MOUSE,SE,tr Q91V38 Q91V38_MOUSE | gLFD<br>EYGS<br>k              | 87% | 41 | 52.7231  | Ref | 0.11 | -0.26 | -0.27 | -0.13 | -0.48 | -0.02 | -0.63 | 21000 | 18300 | 15400 | 17100 | 20700 | 14200 | 20500 | 13300 | 812.4 | 1622.9 | 2 | 0.0074 | 4.576 |
| Endoplasmin<br>OS=Mus musculus<br>GN=Hsp90b1 PE=1<br>SV=2 | sp P08113 ENPL_MOUSE,s<br>p Q66HD0 ENPL_RAT,sp Q95M18 ENPL_BOVIN,tr F1MZ62 F1MZ62_BOVIN,tr Q3UAD6 Q3UAD6_MOUSE,tr Q3UBU0 Q3UBU0_MOUSE,SE,tr Q91V38 Q91V38_MOUSE | gVV<br>DSD<br>DLPL<br>NVS<br>R | 95% | 52 | 53.12628 | Ref | 0.19 | -0.18 | -0.16 | -0.22 | -0.68 | 0.04  | -0.55 | 9750  | 9960  | 8400  | 9520  | 10100 | 6410  | 11000 | 7240  | 895.5 | 1788.9 | 2 | 0.0143 | 7.966 |

|                                                                     |                                                                                                                                                                             |                                                     |            |             |                 |            |               |              |              |              |              |              |              |             |             |             |             |             |             |             |             |              |               |          |               |              |
|---------------------------------------------------------------------|-----------------------------------------------------------------------------------------------------------------------------------------------------------------------------|-----------------------------------------------------|------------|-------------|-----------------|------------|---------------|--------------|--------------|--------------|--------------|--------------|--------------|-------------|-------------|-------------|-------------|-------------|-------------|-------------|-------------|--------------|---------------|----------|---------------|--------------|
| <p>Endoplasmin<br/>OS=Mus musculus<br/>GN=Hsp90b1 PE=1<br/>SV=2</p> | <p>sp P08113 ENPL_MOUSE,s<br/>p Q66HD0 ENPL_RAT,sp Q95M18 ENPL_BOVIN, tr F1MZ62 F1MZ62_BOVIN, tr Q3UAD6 Q3UAD6_MOUSE, tr Q3UBU0 Q3UBU0_MOUSE, tr Q91V38 Q91V38_MOUSE SE</p> | <p>IIINS<br/>LYk</p>                                | <p>88%</p> | <p>36.8</p> | <p>47.88218</p> | <p>Ref</p> | <p>0.025</p>  | <p>-0.17</p> | <p>-0.11</p> | <p>-0.25</p> | <p>-0.37</p> | <p>-0.17</p> | <p>-0.7</p>  | <p>9630</p> | <p>7480</p> | <p>7070</p> | <p>8270</p> | <p>8270</p> | <p>6670</p> | <p>7980</p> | <p>5480</p> | <p>786.5</p> | <p>1571</p>   | <p>2</p> | <p>0.0099</p> | <p>6.278</p> |
| <p>Endoplasmin<br/>OS=Mus musculus<br/>GN=Hsp90b1 PE=1<br/>SV=2</p> | <p>sp P08113 ENPL_MOUSE,s<br/>p Q66HD0 ENPL_RAT,sp Q95M18 ENPL_BOVIN, tr F1MZ62 F1MZ62_BOVIN, tr Q3UAD6 Q3UAD6_MOUSE, tr Q3UBU0 Q3UBU0_MOUSE, tr Q91V38 Q91V38_MOUSE SE</p> | <p>IISLT<br/>DEN<br/>ALA<br/>GNE<br/>ELTV<br/>k</p> | <p>95%</p> | <p>73.4</p> | <p>54.34467</p> | <p>Ref</p> | <p>-0.044</p> | <p>-0.3</p>  | <p>-0.13</p> | <p>-0.16</p> | <p>-0.11</p> | <p>-0.19</p> | <p>-0.43</p> | <p>4220</p> | <p>3760</p> | <p>3410</p> | <p>4320</p> | <p>4650</p> | <p>4220</p> | <p>4160</p> | <p>3500</p> | <p>880.2</p> | <p>2637.5</p> | <p>3</p> | <p>0.0151</p> | <p>5.731</p> |



|                                                           |                                                                                                                                                              |                                         |     |      |          |     |        |       |       |       |       |       |       |      |      |      |      |      |      |      |      |       |        |   |        |       |
|-----------------------------------------------------------|--------------------------------------------------------------------------------------------------------------------------------------------------------------|-----------------------------------------|-----|------|----------|-----|--------|-------|-------|-------|-------|-------|-------|------|------|------|------|------|------|------|------|-------|--------|---|--------|-------|
| Endoplasmin<br>OS=Mus musculus<br>GN=Hsp90b1 PE=1<br>SV=2 | sp P08113 ENPL_MOUSE,s<br>p Q66HD0 ENPL_RAT,sp Q95M18 ENPL_BOVIN,tr F1MZ62 F1MZ62_BOVIN,tr Q3UAD6 Q3UAD6_MOUSE,tr Q3UBU0 Q3UBU0_MOUSE,tr Q91V38 Q91V38_MOUSE | IISLT<br>DEN<br>ALA<br>GNE<br>ELTV<br>k | 95% | 88.6 | 54.4341  | Ref | -0.044 | -0.01 | -0.31 | -0.1  | -0.22 | -0.28 | -0.52 | 631  | 532  | 593  | 539  | 686  | 551  | 552  | 464  | 880.2 | 2637.4 | 3 | 0.019  | 7.186 |
| Endoplasmin<br>OS=Mus musculus<br>GN=Hsp90b1 PE=1<br>SV=2 | sp P08113 ENPL_MOUSE,s<br>p Q66HD0 ENPL_RAT,sp Q95M18 ENPL_BOVIN,tr F1MZ62 F1MZ62_BOVIN,tr Q3UAD6 Q3UAD6_MOUSE,tr Q3UBU0 Q3UBU0_MOUSE,tr Q91V38 Q91V38_MOUSE | nLLH<br>VTDT<br>GVG<br>MTR              | 73% | 37.3 | 53.31139 | Ref | -0.16  | -0.61 | -0.15 | -0.24 | -0.04 | 0.075 | -0.09 | 1500 | 1430 | 1130 | 1740 | 1820 | 1810 | 2050 | 1820 | 606.7 | 1817   | 3 | 0.0143 | 7.885 |

|                                                           |                                                                                                                                                                    |                   |     |      |          |     |        |       |       |       |       |       |       |       |       |       |       |       |       |       |       |       |        |   |        |       |
|-----------------------------------------------------------|--------------------------------------------------------------------------------------------------------------------------------------------------------------------|-------------------|-----|------|----------|-----|--------|-------|-------|-------|-------|-------|-------|-------|-------|-------|-------|-------|-------|-------|-------|-------|--------|---|--------|-------|
| Endoplasmin<br>OS=Mus musculus<br>GN=Hsp90b1 PE=1<br>SV=2 | sp P08113 ENPL_MOUSE,s<br>p Q66HD0 ENPL_RAT,sp Q95M18 ENPL_BOVIN,tr F1MZ62 F1MZ62_BOVIN,tr Q3UAD6 Q3UAD6_MOUSE,tr Q3UBU0 Q3UBU0_MOUSE,SE,tr Q91V38 Q91V38_MOUSE,SE | sGTS<br>EFLN<br>k | 88% | 41.4 | 52.70598 | Ref | -0.075 | -0.18 | -0.13 | -0.16 | -0.43 | -0.11 | -0.37 | 13900 | 11500 | 11600 | 13500 | 14500 | 10500 | 13700 | 11300 | 795.9 | 1589.9 | 2 | 0.0075 | 4.736 |
| Endoplasmin<br>OS=Mus musculus<br>GN=Hsp90b1 PE=1<br>SV=2 | sp P08113 ENPL_MOUSE,s<br>p Q66HD0 ENPL_RAT,sp Q95M18 ENPL_BOVIN,tr F1MZ62 F1MZ62_BOVIN,tr Q3UAD6 Q3UAD6_MOUSE,tr Q3UBU0 Q3UBU0_MOUSE,SE,tr Q91V38 Q91V38_MOUSE,SE | sGTS<br>EFLN<br>k | 83% | 39.1 | 52.66605 | Ref | -0.03  | -0.21 | -0.06 | -0.2  | -0.34 | -0.13 | -0.4  | 8140  | 7340  | 7040  | 8740  | 8760  | 6930  | 8370  | 6890  | 795.9 | 1589.9 | 2 | 0.0107 | 6.735 |

|                                                              |                                                                                                                                                              |                           |     |      |          |     |        |       |      |       |       |       |       |       |       |       |        |       |       |       |       |       |        |   |        |       |
|--------------------------------------------------------------|--------------------------------------------------------------------------------------------------------------------------------------------------------------|---------------------------|-----|------|----------|-----|--------|-------|------|-------|-------|-------|-------|-------|-------|-------|--------|-------|-------|-------|-------|-------|--------|---|--------|-------|
| Endoplasmin<br>OS=Mus musculus<br>GN=Hsp90b1 PE=1<br>SV=2    | sp P08113 ENPL_MOUSE,sp Q66HD0 ENPL_RAT,sp Q95M18 ENPL_BOVIN, tr F1MZ62 F1MZ62_BOVIN, tr Q3UAD6 Q3UAD6_MOUSE, tr Q3UBU0 Q3UBU0_MOUSE, tr Q91V38 Q91V38_MOUSE | tDDE<br>VVQ<br>R          | 60% | 31.1 | 50.26476 | Ref | 0.04   | -0.09 | -0.2 | -0.34 | -0.23 | -0.47 | -0.46 | 16300 | 12700 | 12600 | 13100  | 13100 | 12400 | 10900 | 10900 | 633.3 | 1264.6 | 2 | 0.0101 | 7.98  |
| Apolipoprotein A-I<br>OS=Bos taurus<br>GN=APOA1 PE=1<br>SV=3 | sp P15497 APOA1_BOVIN                                                                                                                                        | aHVE<br>TLR               | 74% | 34.3 | 49.93427 | Ref | 0.17   | 0.28  | 0.83 | 0.023 | 0.15  | 0.29  | -0.14 | 82900 | 81200 | 94900 | 156000 | 98200 | 93700 | 1E+05 | 79300 | 377.2 | 1128.6 | 3 | 0.0075 | 6.632 |
| Apolipoprotein A-I<br>OS=Bos taurus<br>GN=APOA1 PE=1<br>SV=3 | sp P15497 APOA1_BOVIN                                                                                                                                        | dYVA<br>QFE<br>ASAL<br>Gk | 95% | 52.3 | 53.90911 | Ref | -0.066 | 0.058 | 0.54 | 0.11  | 0.053 | 0.57  | 0.52  | 9760  | 9080  | 10700 | 16800  | 13800 | 11600 | 17300 | 16600 | 669.7 | 2006.1 | 3 | 0.0136 | 6.778 |
| Apolipoprotein A-I<br>OS=Bos taurus<br>GN=APOA1 PE=1<br>SV=3 | sp P15497 APOA1_BOVIN                                                                                                                                        | dYVA<br>QFE<br>ASAL<br>Gk | 88% | 44.4 | 53.90937 | Ref | 0.18   | 0.13  | 0.35 | 0.17  | 0.3   | 0.33  | 0.32  | 7000  | 6770  | 7090  | 9260   | 9000  | 8590  | 9150  | 9070  | 669.7 | 2006.1 | 3 | 0.0116 | 5.776 |
| Apolipoprotein A-I<br>OS=Bos taurus<br>GN=APOA1 PE=1<br>SV=3 | sp P15497 APOA1_BOVIN                                                                                                                                        | dYVA<br>QFE<br>ASAL<br>Gk | 91% | 46.8 | 53.99791 | Ref | 0.18   | 0.1   | 0.32 | 0.14  | 0.17  | 0.36  | 0.5   | 6450  | 6320  | 6520  | 8510   | 8260  | 7360  | 8790  | 9620  | 669.7 | 2006.1 | 3 | 0.0275 | 13.71 |

|                                                              |                       |                            |     |      |          |     |       |       |      |        |       |      |       |       |       |       |       |       |       |       |       |       |        |   |        |       |
|--------------------------------------------------------------|-----------------------|----------------------------|-----|------|----------|-----|-------|-------|------|--------|-------|------|-------|-------|-------|-------|-------|-------|-------|-------|-------|-------|--------|---|--------|-------|
| Apolipoprotein A-I<br>OS=Bos taurus<br>GN=APOA1 PE=1<br>SV=3 | sp P15497 APOA1_BOVIN | dyVA<br>QFE<br>ASAL<br>Gk  | 69% | 37   | 53.92526 | Ref | 0.16  | 0.12  | 0.3  | 0.28   | 0.061 | 0.57 | 0.24  | 1080  | 1020  | 1080  | 1380  | 1490  | 1120  | 1670  | 1310  | 771.1 | 2310.3 | 3 | 0.0197 | 8.527 |
| Apolipoprotein A-I<br>OS=Bos taurus<br>GN=APOA1 PE=1<br>SV=3 | sp P15497 APOA1_BOVIN | ILDN<br>WDT<br>LAST<br>LSk | 92% | 48.6 | 53.62766 | Ref | 0.23  | 0.31  | 0.44 | 0.061  | 0.13  | 0.35 | 0.22  | 5090  | 5010  | 5730  | 7040  | 5980  | 5460  | 6670  | 6040  | 729.1 | 2184.2 | 3 | 0.0118 | 5.387 |
| Apolipoprotein A-I<br>OS=Bos taurus<br>GN=APOA1 PE=1<br>SV=3 | sp P15497 APOA1_BOVIN | ISPL<br>AQEL<br>R          | 71% | 34   | 50.6301  | Ref | 0.015 | 0.41  | 0.43 | 0.35   | -0.42 | 0.75 | 0.033 | 7520  | 6910  | 9870  | 11300 | 11700 | 6000  | 14100 | 8500  | 444.3 | 1329.8 | 3 | 0.009  | 6.739 |
| Apolipoprotein A-I<br>OS=Bos taurus<br>GN=APOA1 PE=1<br>SV=3 | sp P15497 APOA1_BOVIN | qQL<br>APYS<br>DDL<br>R    | 92% | 43.6 | 52.22784 | Ref | 0.062 | 0.55  | 0.16 | 0.31   | -0.25 | 0.51 | -0.17 | 14600 | 9680  | 14800 | 12600 | 15400 | 9110  | 16100 | 10000 | 805.4 | 1608.8 | 2 | 0.0126 | 7.8   |
| Apolipoprotein A-I<br>OS=Bos taurus<br>GN=APOA1 PE=1<br>SV=3 | sp P15497 APOA1_BOVIN | vkDF<br>ATVY<br>VEAI<br>k  | 95% | 50.1 | 51.43835 | Ref | 0.059 | 0.025 | 0.51 | 0.33   | 0.2   | 0.59 | 0.064 | 1800  | 1750  | 1850  | 2920  | 2820  | 2270  | 3100  | 2130  | 799.1 | 2394.4 | 3 | 0.0282 | 11.79 |
| Apolipoprotein A-I<br>OS=Bos taurus<br>GN=APOA1 PE=1<br>SV=3 | sp P15497 APOA1_BOVIN | vQEL<br>QDk                | 70% | 34.7 | 52.02406 | Ref | 0.38  | 0.26  | 0.45 | 0.2    | -0.05 | 0.38 | -0.12 | 21000 | 20300 | 20200 | 26000 | 24000 | 17600 | 24900 | 17500 | 734.4 | 1466.8 | 2 | 0.0238 | 16.2  |
| Apolipoprotein A-I<br>OS=Bos taurus<br>GN=APOA1 PE=1<br>SV=3 | sp P15497 APOA1_BOVIN | vQPY<br>LDEF<br>Qk         | 56% | 33.8 | 53.47404 | Ref | 0.25  | 0.34  | 0.2  | -0.005 | 0.052 | 0.51 | 0.44  | 24400 | 26400 | 30300 | 31100 | 29600 | 26900 | 38700 | 36400 | 625.7 | 1874   | 3 | 0.0196 | 10.44 |

|                                                                               |                                             |                  |     |      |          |     |       |       |       |        |       |       |       |       |       |       |       |       |       |       |       |       |        |   |        |       |
|-------------------------------------------------------------------------------|---------------------------------------------|------------------|-----|------|----------|-----|-------|-------|-------|--------|-------|-------|-------|-------|-------|-------|-------|-------|-------|-------|-------|-------|--------|---|--------|-------|
| Apolipoprotein A-I<br>OS=Bos taurus<br>GN=APOA1 PE=1<br>SV=3                  | sp P15497 APOA1_BOVIN                       | vQPYLDEFQk       | 80% | 38.7 | 53.41658 | Ref | 0.21  | 0.004 | 0.58  | 0.3    | -0.02 | 0.56  | 0.21  | 13100 | 15100 | 14200 | 23700 | 21600 | 15100 | 23500 | 18300 | 938   | 1874   | 2 | 0.0074 | 3.959 |
| Apolipoprotein A-I<br>OS=Bos taurus<br>GN=APOA1 PE=1<br>SV=3                  | sp P15497 APOA1_BOVIN                       | wHEEVEIYR        | 73% | 35.2 | 51.30147 | Ref | 0.28  | 0.26  | 0.56  | 0.21   | 0.16  | 0.29  | 0.13  | 12100 | 14000 | 15000 | 20700 | 18000 | 15100 | 17300 | 15300 | 522.3 | 1563.8 | 3 | 0.0144 | 9.194 |
| Ubiquitin-associated protein 2 like OS=Homo sapiens<br>GN=UBAP2L PE=1<br>SV=2 | sp Q14157 UBP2L_HUMAN,sp Q80X50 UBP2L_MOUSE | dGSLASN PYSGDLTK | 95% | 58.4 | 54.0303  | Ref | -0.25 | -0.18 | 0.085 | -0.041 | 0.1   | -0.32 | 0.056 | 17200 | 15200 | 17300 | 23300 | 23600 | 22700 | 17700 | 22800 | 711.7 | 2132.1 | 3 | 0.0158 | 7.427 |
| Ubiquitin-associated protein 2 like OS=Homo sapiens<br>GN=UBAP2L PE=1<br>SV=2 | sp Q14157 UBP2L_HUMAN,sp Q80X50 UBP2L_MOUSE | dGSLASN PYSGDLTK | 95% | 53.1 | 54.03939 | Ref | -0.51 | -0.46 | 0.23  | -0.1   | 0.37  | -0.98 | -0.02 | 5150  | 2670  | 2990  | 5450  | 4760  | 5760  | 2350  | 4560  | 1067  | 2132.1 | 2 | 0.0146 | 6.853 |
| Ubiquitin-associated protein 2 like OS=Homo sapiens<br>GN=UBAP2L PE=1<br>SV=2 | sp Q14157 UBP2L_HUMAN,sp Q80X50 UBP2L_MOUSE | gFGDVG EAK       | 80% | 38.3 | 52.95989 | Ref | -0.32 | -0.21 | -0    | -0.24  | 0.28  | -0.66 | 0.063 | 57400 | 36800 | 43100 | 55800 | 52100 | 65200 | 35400 | 58200 | 744.4 | 1486.8 | 2 | 0.0139 | 9.331 |

|                                                                         |                                             |                                   |     |      |          |     |        |       |       |       |       |       |       |       |      |      |       |      |       |      |      |       |        |   |        |       |
|-------------------------------------------------------------------------|---------------------------------------------|-----------------------------------|-----|------|----------|-----|--------|-------|-------|-------|-------|-------|-------|-------|------|------|-------|------|-------|------|------|-------|--------|---|--------|-------|
| Ubiquitin-associated protein 2 like OS=Homo sapiens GN=UBAP2L PE=1 SV=2 | sp Q14157 UBP2L_HUMAN,sp Q80X50 UBP2L_MOUSE | gGST TGS QFLE QFk                 | 91% | 47   | 54.16777 | Ref | -0.19  | -0.17 | 0.007 | -0.16 | 0.17  | -0.21 | 0.083 | 4890  | 4760 | 5250 | 6660  | 6550 | 7170  | 5780 | 7010 | 699   | 2094.1 | 3 | 0.0195 | 9.312 |
| Ubiquitin-associated protein 2 like OS=Homo sapiens GN=UBAP2L PE=1 SV=2 | sp Q14157 UBP2L_HUMAN,sp Q80X50 UBP2L_MOUSE | gQEn GLD GtK                      | 93% | 45   | 52.51487 | Ref | -0.28  | -0.12 | 0.1   | -0.26 | 0.29  | -0.73 | -0.09 | 10100 | 6730 | 8150 | 10700 | 9170 | 11800 | 6030 | 9350 | 814.4 | 1626.9 | 2 | 0.014  | 8.612 |
| Ubiquitin-associated protein 2 like OS=Homo sapiens GN=UBAP2L PE=1 SV=2 | sp Q14157 UBP2L_HUMAN,sp Q80X50 UBP2L_MOUSE | IDLA VLLG k                       | 90% | 37   | 45.01771 | Ref | -0.3   | -0.15 | -0.16 | -0.15 | 0.27  | -0.64 | 0.068 | 3310  | 2130 | 2570 | 2860  | 3180 | 3710  | 2060 | 3350 | 517.3 | 1549   | 3 | 0.0031 | 1.995 |
| Ubiquitin-associated protein 2 like OS=Homo sapiens GN=UBAP2L PE=1 SV=2 | sp Q14157 UBP2L_HUMAN,sp Q80X50 UBP2L_MOUSE | nGFS SVQ ATQL QTT QSV EGA TGS AVk | 80% | 40.1 | 55.94271 | Ref | -0.033 | -0.03 | 0.046 | -0.26 | 0.022 | -0.35 | -0.16 | 2480  | 2160 | 2350 | 2770  | 2470 | 2630  | 2120 | 2400 | 802.2 | 3204.6 | 4 | 0.0277 | 8.641 |
| Ubiquitin-associated protein 2 like OS=Homo sapiens GN=UBAP2L PE=1 SV=2 | sp Q14157 UBP2L_HUMAN,sp Q80X50 UBP2L_MOUSE | nQD EcVI ALH Dcn GDV NR           | 95% | 69.5 | 44.8193  | Ref | -0.18  | -0.19 | -0.3  | -0.19 | 0.37  | -0.15 | 0.16  | 4470  | 4580 | 4930 | 5130  | 6130 | 7860  | 5740 | 7070 | 804.7 | 2411   | 3 | 0.0211 | 8.727 |

|                                                                         |                                             |                         |     |      |          |     |        |       |       |       |       |       |       |      |      |      |      |      |      |      |      |       |        |   |        |       |
|-------------------------------------------------------------------------|---------------------------------------------|-------------------------|-----|------|----------|-----|--------|-------|-------|-------|-------|-------|-------|------|------|------|------|------|------|------|------|-------|--------|---|--------|-------|
| Ubiquitin-associated protein 2 like OS=Homo sapiens GN=UBAP2L PE=1 SV=2 | sp Q14157 UBP2L_HUMAN,sp Q80X50 UBP2L_MOUSE | sAYnSYSWGAN             | 84% | 32.9 | 46.1325  | Ref | -0.048 | -0.54 | -0.26 | -0.53 | -0.07 | -0.17 | 0.42  | 234  | 174  | 135  | 183  | 168  | 201  | 196  | 291  | 762.8 | 1523.7 | 2 | 0.0112 | 7.353 |
| Ubiquitin-associated protein 2 like OS=Homo sapiens GN=UBAP2L PE=1 SV=2 | sp Q14157 UBP2L_HUMAN,sp Q80X50 UBP2L_MOUSE | sQTS SIPQkPQT           | 59% | 33.6 | 52.69957 | Ref | -0.41  | -0.06 | -0.13 | -0.1  | 0.29  | -0.45 | 0.066 | 2900 | 2040 | 2820 | 3010 | 3380 | 3890 | 2430 | 3440 | 819.5 | 2455.4 | 3 | 0.012  | 4.869 |
| Ubiquitin-associated protein 2 like OS=Homo sapiens GN=UBAP2L PE=1 SV=2 | sp Q14157 UBP2L_HUMAN,sp Q80X50 UBP2L_MOUSE | sSVA TTSGk              | 93% | 44.1 | 51.75245 | Ref | -0.19  | -0.38 | 0.13  | -0.11 | 0.21  | -0.66 | 0.066 | 6810 | 5180 | 4930 | 7870 | 7380 | 8000 | 4580 | 7530 | 723.4 | 1444.8 | 2 | 0.0223 | 15.44 |
| Ubiquitin-associated protein 2 like OS=Homo sapiens GN=UBAP2L PE=1 SV=2 | sp Q14157 UBP2L_HUMAN,sp Q80X50 UBP2L_MOUSE | tATE EWGTED WNE DLSE Tk | 95% | 71.3 | 52.71145 | Ref | -0.16  | -0.37 | -0.05 | -0.17 | 0.52  | -0.62 | -0.13 | 2800 | 2250 | 2110 | 2940 | 2980 | 4220 | 1990 | 2790 | 950.5 | 2848.3 | 3 | 0.0194 | 6.804 |
| Ubiquitin-associated protein 2 like OS=Homo sapiens GN=UBAP2L PE=1 SV=2 | sp Q14157 UBP2L_HUMAN,sp Q80X50 UBP2L_MOUSE | tATE EWGTED WNE DLSE Tk | 95% | 68.3 | 52.8788  | Ref | -0.34  | -0.19 | -0.28 | 0.008 | 0.17  | -0.81 | 0.27  | 1560 | 981  | 1180 | 1250 | 1670 | 1630 | 862  | 1820 | 950.5 | 2848.3 | 3 | 0.0139 | 4.877 |

|                                                                    |                                |                           |     |      |          |     |       |       |       |        |       |       |       |       |       |       |       |       |       |       |       |       |        |   |        |       |
|--------------------------------------------------------------------|--------------------------------|---------------------------|-----|------|----------|-----|-------|-------|-------|--------|-------|-------|-------|-------|-------|-------|-------|-------|-------|-------|-------|-------|--------|---|--------|-------|
| PDIA6 protein<br>(Fragment) OS=Bos<br>taurus GN=PDIA6<br>PE=2 SV=1 | tr A6QNL<br>5 A6QNL<br>5_BOVIN | gESP<br>VDY<br>DGG<br>R   | 95% | 43.4 | 48.66482 | Ref | 0.01  | 0.049 | -0.22 | -0.095 | -0.16 | -0.15 | -0.17 | 41100 | 37800 | 42100 | 39300 | 47100 | 39500 | 41400 | 40400 | 728.3 | 1454.7 | 2 | 0.0108 | 7.449 |
| PDIA6 protein<br>(Fragment) OS=Bos<br>taurus GN=PDIA6<br>PE=2 SV=1 | tr A6QNL<br>5 A6QNL<br>5_BOVIN | gSFS<br>EQGI<br>NEFL<br>R | 88% | 42.9 | 52.6205  | Ref | 0.085 | -0.17 | -0.17 | -0.22  | -0.06 | -0.23 | -0.04 | 3050  | 2810  | 2560  | 2860  | 3050  | 2970  | 2750  | 3130  | 596.6 | 1786.9 | 3 | 0.0159 | 8.876 |
| PDIA6 protein<br>(Fragment) OS=Bos<br>taurus GN=PDIA6<br>PE=2 SV=1 | tr A6QNL<br>5 A6QNL<br>5_BOVIN | gSFS<br>EQGI<br>NEFL<br>R | 75% | 37   | 52.56198 | Ref | 0.018 | -0.11 | -0.07 | -0.17  | -0.05 | -0.2  | -0.12 | 3750  | 3510  | 3500  | 4020  | 4140  | 3920  | 3690  | 3890  | 596.6 | 1786.9 | 3 | 0.0116 | 6.51  |
| PDIA6 protein<br>(Fragment) OS=Bos<br>taurus GN=PDIA6<br>PE=2 SV=1 | tr A6QNL<br>5 A6QNL<br>5_BOVIN | gSFS<br>EQGI<br>NEFL<br>R | 92% | 44.2 | 52.62938 | Ref | 0.052 | 0.027 | -0.19 | -0.21  | -0.12 | 0.039 | -0.3  | 9350  | 9090  | 9700  | 9380  | 10200 | 9430  | 11000 | 8660  | 894.5 | 1786.9 | 2 | 0.0094 | 5.243 |
| PDIA6 protein<br>(Fragment) OS=Bos<br>taurus GN=PDIA6<br>PE=2 SV=1 | tr A6QNL<br>5 A6QNL<br>5_BOVIN | gSFS<br>EQGI<br>NEFL<br>R | 95% | 50.8 | 52.63873 | Ref | 0.13  | -0.02 | -0.1  | -0.26  | -0.09 | -0.13 | -0.34 | 6820  | 6590  | 6410  | 6820  | 6710  | 6600  | 6720  | 5770  | 894.5 | 1786.9 | 2 | 0.0091 | 5.108 |
| PDIA6 protein<br>(Fragment) OS=Bos<br>taurus GN=PDIA6<br>PE=2 SV=1 | tr A6QNL<br>5 A6QNL<br>5_BOVIN | gSFS<br>EQGI<br>NEFL<br>R | 75% | 36.5 | 52.52533 | Ref | 0.16  | -0.23 | -0.21 | -0.097 | -0.11 | -0.05 | -0.3  | 3900  | 3780  | 3120  | 3560  | 4230  | 3650  | 4000  | 3320  | 894.5 | 1786.9 | 2 | 0.0124 | 6.954 |



|                                                                    |                                |                                   |     |      |          |     |        |       |       |        |       |       |       |       |       |       |       |       |       |       |       |       |        |   |        |       |
|--------------------------------------------------------------------|--------------------------------|-----------------------------------|-----|------|----------|-----|--------|-------|-------|--------|-------|-------|-------|-------|-------|-------|-------|-------|-------|-------|-------|-------|--------|---|--------|-------|
| PDIA6 protein<br>(Fragment) OS=Bos<br>taurus GN=PDIA6<br>PE=2 SV=1 | tr A6QNL<br>5 A6QNL<br>5_BOVIN | gSGY<br>SSGk                      | 62% | 33.2 | 52.11766 | Ref | -0.11  | -0    | -0.06 | -0.14  | -0.05 | -0.15 | -0.3  | 20900 | 16700 | 19500 | 21000 | 21900 | 20500 | 19900 | 17800 | 675.9 | 1349.7 | 2 | 0.0259 | 19.14 |
| PDIA6 protein<br>(Fragment) OS=Bos<br>taurus GN=PDIA6<br>PE=2 SV=1 | tr A6QNL<br>5 A6QNL<br>5_BOVIN | gSTA<br>PVG<br>GGA<br>FPTI<br>STR | 95% | 60.9 | 53.55663 | Ref | -0.13  | -0.04 | -0.11 | -0.11  | -0.01 | 0.003 | -0.51 | 11600 | 8850  | 10200 | 11000 | 12100 | 11300 | 11900 | 8270  | 940.5 | 1879   | 2 | 0.0112 | 5.961 |
| PDIA6 protein<br>(Fragment) OS=Bos<br>taurus GN=PDIA6<br>PE=2 SV=1 | tr A6QNL<br>5 A6QNL<br>5_BOVIN | IAAV<br>DAT<br>VNQ<br>VLAS<br>R   | 95% | 50   | 52.88339 | Ref | -0.038 | -0.03 | -0.05 | -0.12  | 0.066 | -0.1  | -0.4  | 1120  | 1040  | 1140  | 1260  | 1320  | 1320  | 1230  | 985   | 916.5 | 1831   | 2 | 0.005  | 2.719 |
| PDIA6 protein<br>(Fragment) OS=Bos<br>taurus GN=PDIA6<br>PE=2 SV=1 | tr A6QNL<br>5 A6QNL<br>5_BOVIN | nLEP<br>EWA<br>AAA<br>TEVk        | 88% | 45   | 54.17198 | Ref | -0.032 | -0.33 | 0.14  | -0.031 | -0.2  | 0.046 | -0.53 | 7580  | 6220  | 5480  | 8500  | 8350  | 6490  | 8030  | 5350  | 713.1 | 2136.2 | 3 | 0.0171 | 8.013 |
| PDIA6 protein<br>(Fragment) OS=Bos<br>taurus GN=PDIA6<br>PE=2 SV=1 | tr A6QNL<br>5 A6QNL<br>5_BOVIN | tGEA<br>IVDA<br>ALSA<br>LR        | 91% | 43.6 | 52.97802 | Ref | -0.024 | -0.05 | -0.21 | -0.31  | -0.11 | -0.02 | -0.25 | 1470  | 1140  | 1210  | 1220  | 1250  | 1250  | 1390  | 1180  | 846   | 1689.9 | 2 | 0.0108 | 6.406 |
| PDIA6 protein<br>(Fragment) OS=Bos<br>taurus GN=PDIA6<br>PE=2 SV=1 | tr A6QNL<br>5 A6QNL<br>5_BOVIN | tGEA<br>IVDA<br>ALSA<br>LR        | 88% | 43.2 | 52.95981 | Ref | -0.2   | 0.13  | -0.14 | 0.1    | -0.2  | -0.23 | -0.33 | 468   | 350   | 478   | 444   | 579   | 410   | 420   | 389   | 564.3 | 1690   | 3 | 0.0058 | 3.424 |

|                                                                    |                                                                                                        |                                     |    |     |      |          |     |       |       |       |        |       |       |       |       |       |      |       |       |       |      |       |       |        |   |        |       |
|--------------------------------------------------------------------|--------------------------------------------------------------------------------------------------------|-------------------------------------|----|-----|------|----------|-----|-------|-------|-------|--------|-------|-------|-------|-------|-------|------|-------|-------|-------|------|-------|-------|--------|---|--------|-------|
| PDIA6 protein<br>(Fragment) OS=Bos<br>taurus GN=PDIA6<br>PE=2 SV=1 | tr A6QNL<br>5 A6QNL<br>5_BOVIN                                                                         | tGEA<br>IVDA<br>ALSA                | LR | 58% | 33.6 | 52.84171 | Ref | -0.34 | -0.15 | -0.13 | 0.037  | -0.28 | 0.073 | 0.004 | 360   | 255   | 316  | 360   | 444   | 310   | 416  | 393   | 564.3 | 1690   | 3 | 0.0063 | 3.743 |
| DPYSL3 protein<br>OS=Bos taurus<br>GN=DPYSL3 PE=2<br>SV=1          | tr A7MBI<br>5 A7MBI5<br>_BOVIN, tr<br> B3SXQ8 <br>B3SXQ8_<br>HUMAN, t<br>r Q6DEN2<br> Q6DEN2<br>_HUMAN | eESR<br>EPAP<br>ASPA<br>PAG<br>VEIR |    | 95% | 52.7 | 54.23714 | Ref | 0.02  | -0.64 | -0.07 | -0.034 | 0.37  | -0.87 | 0.23  | 12800 | 11600 | 7970 | 13300 | 15000 | 17300 | 7660 | 16300 | 756.4 | 2266.2 | 3 | 0.0214 | 9.441 |
| DPYSL3 protein<br>OS=Bos taurus<br>GN=DPYSL3 PE=2<br>SV=1          | tr A7MBI<br>5 A7MBI5<br>_BOVIN, tr<br> B3SXQ8 <br>B3SXQ8_<br>HUMAN, t<br>r Q6DEN2<br> Q6DEN2<br>_HUMAN | eESR<br>EPAP<br>ASPA<br>PAG<br>VEIR |    | 88% | 44.7 | 54.29266 | Ref | -0.14 | -0.58 | 0.11  | -0.11  | 0.46  | -0.85 | 0.2   | 9020  | 7800  | 6230 | 11200 | 10600 | 13800 | 5800 | 11900 | 756.4 | 2266.2 | 3 | 0.0187 | 8.237 |
| DPYSL3 protein<br>OS=Bos taurus<br>GN=DPYSL3 PE=2<br>SV=1          | tr A7MBI<br>5 A7MBI5<br>_BOVIN, tr<br> B3SXQ8 <br>B3SXQ8_<br>HUMAN, t<br>r Q6DEN2<br> Q6DEN2<br>_HUMAN | eVLQ<br>NLG<br>Pk                   |    | 95% | 49.2 | 50.08707 | Ref | -0.01 | -0.43 | 0.19  | -0.043 | 0.28  | -0.83 | -0.08 | 14200 | 12200 | 9900 | 17100 | 16000 | 17500 | 8480 | 14200 | 803.5 | 1605   | 2 | 0.0088 | 5.452 |
| DPYSL3 protein<br>OS=Bos taurus<br>GN=DPYSL3 PE=2<br>SV=1          | tr A7MBI<br>5 A7MBI5<br>_BOVIN, tr<br> B3SXQ8 <br>B3SXQ8_<br>HUMAN, t<br>r Q6DEN2<br> Q6DEN2<br>_HUMAN | eVLQ<br>NLG<br>Pk                   |    | 71% | 33.2 | 49.87313 | Ref | 0.005 | -0.39 | 0.092 | -0.17  | -0    | -0.11 | -0.07 | 4100  | 3680  | 3040 | 4760  | 4390  | 4300  | 4170 | 4240  | 536   | 1605   | 3 | 0.0072 | 4.478 |

|                                                           |                                                                        |                                        |     |      |          |     |       |       |       |        |       |       |       |       |       |      |       |       |       |      |       |       |        |   |        |       |
|-----------------------------------------------------------|------------------------------------------------------------------------|----------------------------------------|-----|------|----------|-----|-------|-------|-------|--------|-------|-------|-------|-------|-------|------|-------|-------|-------|------|-------|-------|--------|---|--------|-------|
| DPYSL3 protein<br>OS=Bos taurus<br>GN=DPYSL3 PE=2<br>SV=1 | tr A7MBI5 A7MBI5_BOVIN, tr B3SXQ8 B3SXQ8_HUMAN, tr Q6DEN2 Q6DEN2_HUMAN | gAPL<br>VVic<br>QGk                    | 92% | 47.1 | 52.22316 | Ref | 0.37  | -0.39 | 0.096 | -0.13  | 0.055 | -0.54 | -0.21 | 5500  | 6520  | 4180 | 6570  | 6180  | 6150  | 4260 | 5310  | 580.3 | 1738   | 3 | 0.0071 | 4.068 |
| DPYSL3 protein<br>OS=Bos taurus<br>GN=DPYSL3 PE=2<br>SV=1 | tr A7MBI5 A7MBI5_BOVIN, tr B3SXQ8 B3SXQ8_HUMAN, tr Q6DEN2 Q6DEN2_HUMAN | gMT<br>TVD<br>DFF<br>QGT<br>k          | 95% | 57.2 | 53.55955 | Ref | 0.099 | -0.5  | -0.03 | -0.2   | -0.08 | -0.67 | 0.47  | 8230  | 7750  | 5560 | 8620  | 8490  | 8020  | 5570 | 12200 | 685.7 | 2054   | 3 | 0.0137 | 6.67  |
| DPYSL3 protein<br>OS=Bos taurus<br>GN=DPYSL3 PE=2<br>SV=1 | tr A7MBI5 A7MBI5_BOVIN, tr B3SXQ8 B3SXQ8_HUMAN, tr Q6DEN2 Q6DEN2_HUMAN | gMT<br>TVD<br>DFF<br>QGT<br>k          | 94% | 50.6 | 53.61958 | Ref | 0.13  | -0.68 | 0.071 | -0.029 | 0.14  | -0.89 | 0.23  | 13400 | 12700 | 7840 | 14800 | 15300 | 15000 | 7670 | 16600 | 685.7 | 2054.1 | 3 | 0.0106 | 5.166 |
| DPYSL3 protein<br>OS=Bos taurus<br>GN=DPYSL3 PE=2<br>SV=1 | tr A7MBI5 A7MBI5_BOVIN, tr B3SXQ8 B3SXQ8_HUMAN, tr Q6DEN2 Q6DEN2_HUMAN | iFNL<br>YPR                            | 54% | 31.3 | 51.28767 | Ref | 0.25  | -0.41 | 0.19  | -0.33  | -0.48 | -0.43 | 0.14  | 1330  | 1210  | 836  | 1420  | 1090  | 855   | 926  | 1370  | 409.6 | 1225.7 | 3 | 0.0108 | 8.783 |
| DPYSL3 protein<br>OS=Bos taurus<br>GN=DPYSL3 PE=2<br>SV=1 | tr A7MBI5 A7MBI5_BOVIN, tr B3SXQ8 B3SXQ8_HUMAN, tr Q6DEN2 Q6DEN2_HUMAN | mVIP<br>GGID<br>VHT<br>HFQ<br>MPY<br>k | 78% | 38.8 | 55.2617  | Ref | 0.083 | -0.66 | 9E-04 | -0.019 | 0.34  | -0.82 | 0.008 | 5330  | 4650  | 3010 | 5350  | 5810  | 6530  | 3040 | 5360  | 670.4 | 2677.4 | 4 | 0.0133 | 4.962 |

|                                                                                 |                                                                        |                                 |     |      |          |     |       |       |       |        |       |       |       |       |       |       |       |       |       |       |       |       |        |   |        |       |
|---------------------------------------------------------------------------------|------------------------------------------------------------------------|---------------------------------|-----|------|----------|-----|-------|-------|-------|--------|-------|-------|-------|-------|-------|-------|-------|-------|-------|-------|-------|-------|--------|---|--------|-------|
| DPYSL3 protein<br>OS=Bos taurus<br>GN=DPYSL3 PE=2<br>SV=1                       | tr A7MBI5 A7MBI5_BOVIN, tr B3SXQ8 B3SXQ8_HUMAN, tr Q6DEN2 Q6DEN2_HUMAN | pGTT<br>DQV<br>PR               | 91% | 41.9 | 50.83004 | Ref | 0.2   | -0.31 | 0.13  | -0.25  | -0.07 | -0.38 | -0.19 | 64300 | 58600 | 44800 | 68200 | 57600 | 57000 | 48100 | 54600 | 637.8 | 1273.7 | 2 | 0.0105 | 8.21  |
| DPYSL3 protein<br>OS=Bos taurus<br>GN=DPYSL3 PE=2<br>SV=1                       | tr A7MBI5 A7MBI5_BOVIN, tr B3SXQ8 B3SXQ8_HUMAN, tr Q6DEN2 Q6DEN2_HUMAN | tIEA<br>nGk                     | 53% | 31.1 | 51.4893  | Ref | 0.15  | -0.54 | 0.09  | -0.16  | 0.35  | -0.82 | -0.04 | 31100 | 29800 | 20000 | 34900 | 32300 | 40100 | 18700 | 31800 | 671.4 | 1340.8 | 2 | 0.0025 | 1.898 |
| DPYSL3 protein<br>OS=Bos taurus<br>GN=DPYSL3 PE=2<br>SV=1                       | tr A7MBI5 A7MBI5_BOVIN, tr B3SXQ8 B3SXQ8_HUMAN, tr Q6DEN2 Q6DEN2_HUMAN | tLDF<br>DAL<br>VGQ<br>R         | 85% | 39.7 | 52.5003  | Ref | 0.018 | -0.58 | 0.096 | -0.26  | 0.33  | -0.88 | 0.2   | 14600 | 12300 | 8840  | 15900 | 13700 | 17900 | 8080  | 17000 | 813.4 | 1624.9 | 2 | 0.011  | 6.745 |
| DPYSL3 protein<br>OS=Bos taurus<br>GN=DPYSL3 PE=2<br>SV=1                       | tr A7MBI5 A7MBI5_BOVIN, tr B3SXQ8 B3SXQ8_HUMAN, tr Q6DEN2 Q6DEN2_HUMAN | yGG<br>MFc<br>NVE<br>GAF<br>ESk | 72% | 35   | 51.21882 | Ref | 0.25  | -0.26 | -0.28 | -0.033 | -0.16 | -0.12 | -0.06 | 708   | 757   | 576   | 635   | 832   | 666   | 714   | 739   | 765   | 2292.1 | 3 | 0.0222 | 9.66  |
| Uncharacterized protein (Fragment)<br>OS=Bos taurus<br>GN=Bt.21712 PE=4<br>SV=1 | tr F1MHR6 F1MHR6_BOVIN                                                 | aGLV<br>IGk                     | 74% | 29.2 | 45.07694 | Ref | -0.12 | -0.2  | -0.24 | -0.048 | 0.009 | -0.27 | -0.13 | 13900 | 9730  | 9950  | 10900 | 13700 | 12400 | 10700 | 11700 | 422.6 | 1264.8 | 3 | 0.0028 | 2.185 |

|                                                                                 |                                |                                                |     |      |          |     |        |       |       |       |       |       |       |       |       |       |       |       |       |       |       |       |        |   |        |       |
|---------------------------------------------------------------------------------|--------------------------------|------------------------------------------------|-----|------|----------|-----|--------|-------|-------|-------|-------|-------|-------|-------|-------|-------|-------|-------|-------|-------|-------|-------|--------|---|--------|-------|
| Uncharacterized protein (Fragment)<br>OS=Bos taurus<br>GN=Bt.21712 PE=4<br>SV=1 | tr F1MHR<br>6 F1MHR<br>6_BOVIN | alNQ<br>QTG<br>AFVE<br>ISR                     | 93% | 46.5 | 53.433   | Ref | 0.035  | -0.27 | -0.14 | -0.29 | 0.2   | -0.61 | 0.12  | 7240  | 6270  | 5510  | 6780  | 6730  | 8240  | 4890  | 8080  | 919.5 | 1837   | 2 | 0.0111 | 6.03  |
| Uncharacterized protein (Fragment)<br>OS=Bos taurus<br>GN=Bt.21712 PE=4<br>SV=1 | tr F1MHR<br>6 F1MHR<br>6_BOVIN | gSPQ<br>QID<br>HAK                             | 58% | 33.6 | 52.89226 | Ref | -0.085 | -0.13 | 0.014 | -0.21 | 0.14  | -0.54 | 0.01  | 49700 | 41800 | 43800 | 54500 | 51400 | 57200 | 37400 | 54200 | 563.7 | 1687.9 | 3 | 0.0087 | 5.161 |
| Uncharacterized protein (Fragment)<br>OS=Bos taurus<br>GN=Bt.21712 PE=4<br>SV=1 | tr F1MHR<br>6 F1MHR<br>6_BOVIN | hSV<br>GVVI<br>GR                              | 85% | 38.9 | 50.3454  | Ref | -0.18  | -0.21 | -0.01 | -0.2  | 0.038 | -0.22 | 0.092 | 26000 | 21400 | 22600 | 29100 | 28200 | 29000 | 25400 | 31200 | 409.9 | 1226.7 | 3 | 0.0083 | 6.746 |
| Uncharacterized protein (Fragment)<br>OS=Bos taurus<br>GN=Bt.21712 PE=4<br>SV=1 | tr F1MHR<br>6 F1MHR<br>6_BOVIN | iGGD<br>AATT<br>VNn<br>STPD<br>FGF<br>GGQ<br>k | 67% | 37.4 | 54.94095 | Ref | 0.028  | -0.27 | 0.011 | -0.34 | 0.028 | -0.33 | 0.068 | 759   | 677   | 598   | 814   | 703   | 793   | 646   | 845   | 921.8 | 2762.4 | 3 | 0.0176 | 6.355 |
| Uncharacterized protein (Fragment)<br>OS=Bos taurus<br>GN=Bt.21712 PE=4<br>SV=1 | tr F1MHR<br>6 F1MHR<br>6_BOVIN | iGGG<br>IDVP<br>VPR                            | 83% | 38.2 | 51.69733 | Ref | -0.007 | -0.24 | 0.002 | -0.15 | 0.077 | -0.6  | 0.081 | 56800 | 50000 | 46300 | 61300 | 60900 | 62100 | 40700 | 64600 | 692.4 | 1382.8 | 2 | 0.011  | 7.917 |

|                                                                                 |                                |                                           |     |      |          |     |        |       |       |       |       |       |       |       |       |       |       |       |       |       |       |       |        |   |        |       |
|---------------------------------------------------------------------------------|--------------------------------|-------------------------------------------|-----|------|----------|-----|--------|-------|-------|-------|-------|-------|-------|-------|-------|-------|-------|-------|-------|-------|-------|-------|--------|---|--------|-------|
| Uncharacterized protein (Fragment)<br>OS=Bos taurus<br>GN=Bt.21712 PE=4<br>SV=1 | tr F1MHR<br>6 F1MHR<br>6_BOVIN | iINDL<br>LQSL<br>R                        | 62% | 33.2 | 52.04424 | Ref | -0.011 | -0.46 | 0.19  | -0.3  | -0.04 | -0.3  | -0.05 | 1980  | 1580  | 1250  | 2210  | 1730  | 1810  | 1590  | 1860  | 745   | 1487.9 | 2 | 0.0065 | 4.334 |
| Uncharacterized protein (Fragment)<br>OS=Bos taurus<br>GN=Bt.21712 PE=4<br>SV=1 | tr F1MHR<br>6 F1MHR<br>6_BOVIN | KLAS<br>QGD<br>SMS<br>SQL<br>GPIH<br>PPPR | 95% | 52.3 | 55.17063 | Ref | 0.045  | 0.016 | -0.14 | -0.19 | -0.17 | 0.066 | -0.06 | 7170  | 8170  | 8690  | 8740  | 9300  | 8240  | 10200 | 9200  | 703.6 | 2810.5 | 4 | 0.0292 | 10.37 |
| Uncharacterized protein (Fragment)<br>OS=Bos taurus<br>GN=Bt.21712 PE=4<br>SV=1 | tr F1MHR<br>6 F1MHR<br>6_BOVIN | mLI<br>QDG<br>SQN<br>TNV<br>DkPL<br>R     | 52% | 34.3 | 54.64287 | Ref | 0.028  | -0.42 | 0.047 | -0.15 | 0.018 | -0.49 | 0.007 | 5440  | 4520  | 3600  | 5570  | 5360  | 5250  | 3870  | 5400  | 884.2 | 2649.5 | 3 | 0.0222 | 8.373 |
| Uncharacterized protein (Fragment)<br>OS=Bos taurus<br>GN=Bt.21712 PE=4<br>SV=1 | tr F1MHR<br>6 F1MHR<br>6_BOVIN | qDD<br>GTG<br>PEK                         | 60% | 33.3 | 52.13818 | Ref | 0.057  | -0.2  | -0.26 | -0.26 | 0.12  | -0.46 | 0.14  | 36500 | 33000 | 30000 | 32300 | 35600 | 40500 | 28200 | 42300 | 518.9 | 1553.8 | 3 | 0.0147 | 9.423 |
| Uncharacterized protein (Fragment)<br>OS=Bos taurus<br>GN=Bt.21712 PE=4<br>SV=1 | tr F1MHR<br>6 F1MHR<br>6_BOVIN | qDD<br>GTG<br>PEK                         | 67% | 34.3 | 52.31054 | Ref | -0.12  | -0.25 | -0.03 | -0.12 | 0.13  | -0.63 | 0.082 | 10000 | 7690  | 7650  | 10000 | 10300 | 10700 | 6610  | 10800 | 777.9 | 1553.8 | 2 | 0.0068 | 4.377 |

|                                                                                 |                        |                           |     |      |          |     |       |       |       |       |       |       |       |       |       |       |        |        |       |       |        |       |        |   |        |       |
|---------------------------------------------------------------------------------|------------------------|---------------------------|-----|------|----------|-----|-------|-------|-------|-------|-------|-------|-------|-------|-------|-------|--------|--------|-------|-------|--------|-------|--------|---|--------|-------|
| Uncharacterized protein (Fragment)<br>OS=Bos taurus<br>GN=Bt.21712 PE=4<br>SV=1 | tr F1MHR6_BOVIN        | qLED<br>GDQ<br>PESK       | 93% | 45.2 | 52.99374 | Ref | -0.18 | -0.32 | 0.095 | -0.19 | 0.25  | -0.73 | 0.063 | 9320  | 6940  | 6790  | 10200  | 9250   | 10900 | 5770  | 9940   | 927.5 | 1852.9 | 2 | 0.0206 | 11.11 |
| Uncharacterized protein (Fragment)<br>OS=Bos taurus<br>GN=Bt.21712 PE=4<br>SV=1 | tr F1MHR6_BOVIN        | sVSL<br>TGA<br>PESV<br>QK | 95% | 57.7 | 52.8481  | Ref | -0.24 | -0.26 | 0.024 | -0.13 | 0.15  | -0.49 | 0.15  | 13000 | 10000 | 10700 | 14600  | 14500  | 15300 | 10300 | 15900  | 956   | 1910.1 | 2 | 0.0117 | 6.116 |
| Uncharacterized protein (Fragment)<br>OS=Bos taurus PE=4<br>SV=1                | tr F1N6S9 F1N6S9_BOVIN | aDID<br>ISGP<br>k         | 89% | 41.2 | 51.56422 | Ref | -0.48 | -0.25 | -0.34 | -0.21 | -0.03 | -0.45 | -0.26 | 18600 | 12000 | 15200 | 16000  | 19300  | 19200 | 15000 | 17000  | 762.4 | 1522.9 | 2 | 0.0102 | 6.706 |
| Uncharacterized protein (Fragment)<br>OS=Bos taurus PE=4<br>SV=1                | tr F1N6S9 F1N6S9_BOVIN | aDID<br>VSAP<br>k         | 93% | 44.5 | 51.5122  | Ref | -0.62 | -0.29 | -0.37 | -0.22 | 0.022 | -0.64 | -0.13 | 28500 | 15400 | 20900 | 22300  | 27300  | 28100 | 18500 | 26300  | 762.4 | 1522.9 | 2 | 0.0084 | 5.511 |
| Uncharacterized protein (Fragment)<br>OS=Bos taurus PE=4<br>SV=1                | tr F1N6S9 F1N6S9_BOVIN | aDID<br>VSG<br>PK         | 93% | 44.2 | 51.98503 | Ref | -0.66 | -0.35 | -0.18 | 0.022 | -0.02 | -0.79 | -0.34 | 2E+05 | 82600 | 1E+05 | 141000 | 178000 | 2E+05 | 92800 | 126000 | 755.4 | 1508.9 | 2 | 0.0151 | 10.01 |

|                                                                  |                            |                                           |     |      |          |     |       |       |       |        |       |       |       |       |       |       |       |       |       |       |       |       |        |   |        |       |
|------------------------------------------------------------------|----------------------------|-------------------------------------------|-----|------|----------|-----|-------|-------|-------|--------|-------|-------|-------|-------|-------|-------|-------|-------|-------|-------|-------|-------|--------|---|--------|-------|
| Uncharacterized protein (Fragment)<br>OS=Bos taurus PE=4<br>SV=1 | tr F1N6S9_1 F1N6S9_1 BOVIN | aEGP<br>EVN<br>VNLP<br>kPDV<br>DISG<br>Pk | 81% | 39.2 | 54.33424 | Ref | -0.61 | -0.21 | -0.43 | -0.094 | 0.054 | -0.47 | -0.4  | 6380  | 3580  | 5120  | 4960  | 6880  | 6650  | 4820  | 5030  | 772.7 | 3086.7 | 4 | 0.0336 | 10.87 |
| Uncharacterized protein (Fragment)<br>OS=Bos taurus PE=4<br>SV=1 | tr F1N6S9_2 F1N6S9_2 BOVIN | iSMP<br>DIDL<br>nLkG<br>Pk                | 66% | 31.4 | 50.98433 | Ref | -0.83 | -0.38 | -0.18 | 0.051  | -0.02 | -0.45 | -0.18 | 13800 | 7750  | 11400 | 14800 | 19100 | 15900 | 12300 | 14800 | 614.1 | 2452.4 | 4 | 0.0072 | 2.934 |
| Uncharacterized protein (Fragment)<br>OS=Bos taurus PE=4<br>SV=1 | tr F1N6S9_3 F1N6S9_3 BOVIN | iSMP<br>DIDL<br>nLkG<br>Pk                | 55% | 30.5 | 52.07734 | Ref | -0.55 | -0.49 | -0.38 | -0.085 | 0.099 | -0.28 | -0.14 | 3520  | 2540  | 2870  | 3490  | 4700  | 4670  | 3740  | 4090  | 614.4 | 2453.4 | 4 | 0.0167 | 6.816 |
| Uncharacterized protein (Fragment)<br>OS=Bos taurus PE=4<br>SV=1 | tr F1N6S9_4 F1N6S9_4 BOVIN | vDID<br>APD<br>VDV<br>HGP<br>DWH<br>Lk    | 93% | 47.8 | 55.18826 | Ref | -0.45 | -0.5  | -0.35 | -0.1   | -0.06 | -0.46 | -0.53 | 29300 | 15800 | 16500 | 20500 | 26800 | 24100 | 19100 | 18100 | 659.8 | 2635.4 | 4 | 0.0233 | 8.846 |
| Uncharacterized protein (Fragment)<br>OS=Bos taurus PE=4<br>SV=1 | tr F1N6S9_5 F1N6S9_5 BOVIN | vDIE<br>GPD<br>VSLE<br>GPE<br>Gk          | 95% | 54.6 | 54.54023 | Ref | -0.15 | -0.3  | -0.43 | -0.39  | -0.32 | -0.04 | -0.28 | 12800 | 11000 | 10800 | 11000 | 12500 | 11500 | 14600 | 12300 | 750.4 | 2248.2 | 3 | 0.0172 | 7.646 |
| Uncharacterized protein (Fragment)<br>OS=Bos taurus PE=4<br>SV=1 | tr F1N6S9_6 F1N6S9_6 BOVIN | vDV<br>AVP<br>DVD<br>VHG<br>PDW<br>HLk    | 93% | 51.4 | 55.00023 | Ref | -0.53 | -0.19 | -0.21 | -0.29  | -0.03 | -0.44 | -0.34 | 4120  | 2540  | 3490  | 3870  | 4040  | 4210  | 3310  | 3520  | 869.5 | 2605.4 | 3 | 0.0192 | 7.367 |



|                                                                                 |                                                                                 |                                        |     |      |          |     |       |       |       |       |       |       |       |       |       |       |       |       |       |       |       |       |        |   |        |       |
|---------------------------------------------------------------------------------|---------------------------------------------------------------------------------|----------------------------------------|-----|------|----------|-----|-------|-------|-------|-------|-------|-------|-------|-------|-------|-------|-------|-------|-------|-------|-------|-------|--------|---|--------|-------|
| Uncharacterized protein (Fragment)<br>OS=Bos taurus PE=4<br>SV=1                | tr F1N6S9_1 F1N6S9_1_BOVIN                                                      | vDV<br>AVP<br>DVD<br>VHG<br>PDW<br>HLk | 51% | 32.7 | 55.00687 | Ref | -0.74 | -0.36 | -0.35 | 0.034 | 0.017 | -0.88 | -0.27 | 30500 | 13800 | 19400 | 22000 | 31600 | 27300 | 15300 | 23200 | 652.4 | 2605.4 | 4 | 0.0192 | 7.35  |
| Uncharacterized protein (Fragment)<br>OS=Bos taurus PE=4<br>SV=1                | tr F1N6S9_2 F1N6S9_2_BOVIN                                                      | vDV<br>DVP<br>DVD<br>VHG<br>PDW<br>Vlk | 95% | 51.9 | 53.18072 | Ref | -0.41 | -0.18 | -0.38 | -0.18 | -0.04 | -0.66 | -0.25 | 12400 | 8230  | 10500 | 10200 | 12900 | 12400 | 8460  | 11100 | 904.5 | 1807   | 2 | 0.0193 | 10.66 |
| Uncharacterized protein (Fragment)<br>OS=Bos taurus PE=4<br>SV=1                | tr F1N6S9_3 F1N6S9_3_BOVIN                                                      | vDV<br>DVP<br>DVD<br>VHG<br>PDW<br>Vlk | 80% | 39.5 | 53.1424  | Ref | -0.45 | -0.3  | -0.23 | -0.08 | -0.23 | -0.61 | -0.27 | 65000 | 39400 | 47400 | 55700 | 68300 | 53800 | 43200 | 54200 | 603.3 | 1807   | 3 | 0.0146 | 8.099 |
| Uncharacterized protein (Fragment)<br>OS=Bos taurus PE=4<br>SV=1                | tr F1N6S9_4 F1N6S9_4_BOVIN                                                      | vDV<br>DVP<br>DVD<br>VHG<br>PDW<br>HLk | 84% | 43.3 | 55.07481 | Ref | -0.5  | -0.38 | -0.23 | -0.21 | -0.18 | -0.55 | -0.06 | 8540  | 5260  | 6190  | 7710  | 8640  | 7690  | 6210  | 8680  | 881.1 | 2640.4 | 3 | 0.0454 | 17.19 |
| Uncharacterized protein (Fragment)<br>OS=Bos taurus<br>GN=Bt.27462 PE=3<br>SV=1 | tr F1MK4_4 F1MK4_4_BOVIN, tr F1PY05_1 F1PY05_1_CANFA, tr F1SR53_1 F1SR53_1_PLHR | cELG<br>PLHR                           | 76% | 34.9 | 49.9638  | Ref | -0.12 | 0.16  | 0.34  | -0.25 | -0.45 | -0.06 | -0.16 | 2090  | 1660  | 2190  | 2770  | 2030  | 1550  | 2120  | 1970  | 425.6 | 1273.6 | 3 | 0.0098 | 7.702 |

|                                                                                 |                                                                                                   |              |     |      |          |     |        |       |      |       |       |       |       |      |      |      |       |      |       |       |       |       |        |   |        |       |
|---------------------------------------------------------------------------------|---------------------------------------------------------------------------------------------------|--------------|-----|------|----------|-----|--------|-------|------|-------|-------|-------|-------|------|------|------|-------|------|-------|-------|-------|-------|--------|---|--------|-------|
| Uncharacterized protein (Fragment)<br>OS=Bos taurus<br>GN=Bt.27462 PE=3<br>SV=1 | tr F1MK4<br>4 F1MK4<br>4_BOVIN,<br>tr F1PY05<br> F1PY05_<br>CANFA,tr <br>F1SR53 F<br>1SR53_P<br>G | cELG<br>PLHR | 95% | 51   | 49.86292 | Ref | -0.23  | -0.21 | 0.28 | -0.28 | 0.044 | 0.011 | -0.07 | 6830 | 5060 | 5580 | 8770  | 6550 | 7170  | 7320  | 6860  | 425.6 | 1273.6 | 3 | 0.0091 | 7.137 |
| Uncharacterized protein (Fragment)<br>OS=Bos taurus<br>GN=Bt.27462 PE=3<br>SV=1 | tr F1MK4<br>4 F1MK4<br>4_BOVIN,<br>tr F1PY05<br> F1PY05_<br>CANFA,tr <br>F1SR53 F<br>1SR53_P<br>G | cELG<br>PLHR | 95% | 48.6 | 49.85947 | Ref | -0.28  | -0.07 | 0.17 | -0.16 | 0.076 | -0.04 | -0.13 | 9340 | 6660 | 8380 | 11100 | 9700 | 9980  | 9600  | 8980  | 425.6 | 1273.6 | 3 | 0.0086 | 6.76  |
| Uncharacterized protein (Fragment)<br>OS=Bos taurus<br>GN=Bt.27462 PE=3<br>SV=1 | tr F1MK4<br>4 F1MK4<br>4_BOVIN,<br>tr F1PY05<br> F1PY05_<br>CANFA,tr <br>F1SR53 F<br>1SR53_P<br>G | fTVP<br>HLR  | 56% | 30.3 | 50.01881 | Ref | -0.062 | -0.33 | 0.35 | -0.31 | 0.32  | 0.078 | -0.13 | 6740 | 8060 | 7260 | 13000 | 9100 | 12300 | 10900 | 9360  | 391.9 | 1172.7 | 3 | 0.0068 | 5.824 |
| Uncharacterized protein (Fragment)<br>OS=Bos taurus<br>GN=Bt.27462 PE=3<br>SV=1 | tr F1MK4<br>4 F1MK4<br>4_BOVIN,<br>tr F1PY05<br> F1PY05_<br>CANFA,tr <br>F1SR53 F<br>1SR53_P<br>G | fTVP<br>HLR  | 82% | 37.5 | 50.22589 | Ref | -0.22  | -0.32 | 0.21 | -0.25 | -0.01 | -0.15 | 0.28  | 8880 | 6730 | 6790 | 11000 | 8840 | 9090  | 8640  | 11500 | 391.9 | 1172.7 | 3 | 0.0126 | 10.73 |
| Uncharacterized protein (Fragment)<br>OS=Bos taurus<br>GN=Bt.27462 PE=3<br>SV=1 | tr F1MK4<br>4 F1MK4<br>4_BOVIN,<br>tr F1PY05<br> F1PY05_<br>CANFA,tr <br>F1SR53 F<br>1SR53_P<br>G | fTVP<br>HLR  | 88% | 40.5 | 49.97718 | Ref | -0.27  | -0.3  | 0.22 | -0.27 | 0.053 | -0.09 | 0.2   | 3590 | 2630 | 2790 | 4500  | 3540 | 3860  | 3650  | 4440  | 391.9 | 1172.7 | 3 | 0.005  | 4.265 |

|                                                                                 |                                                                                                    |                             |     |      |          |     |       |       |       |        |       |       |       |      |      |      |       |       |       |       |       |       |        |   |        |       |
|---------------------------------------------------------------------------------|----------------------------------------------------------------------------------------------------|-----------------------------|-----|------|----------|-----|-------|-------|-------|--------|-------|-------|-------|------|------|------|-------|-------|-------|-------|-------|-------|--------|---|--------|-------|
| Uncharacterized protein (Fragment)<br>OS=Bos taurus<br>GN=Bt.27462 PE=3<br>SV=1 | tr F1MK4<br>4 F1MK4<br>4_BOVIN,<br>tr F1PY05<br> F1PY05_<br>CANFA,tr <br>F1SR53 F<br>1SR53_P<br>IG | kTIQ<br>FDF<br>QILS<br>k    | 54% | 27.6 | 49.32261 | Ref | 0.068 | -0.32 | 0.032 | -0.079 | -0.19 | -0.19 | 0.22  | 1320 | 1200 | 994  | 1420  | 1450  | 1180  | 1220  | 1620  | 595.9 | 2379.4 | 4 | 0.0023 | 0.983 |
| Uncharacterized protein (Fragment)<br>OS=Bos taurus<br>GN=Bt.27462 PE=3<br>SV=1 | tr F1MK4<br>4 F1MK4<br>4_BOVIN,<br>tr F1PY05<br> F1PY05_<br>CANFA,tr <br>F1SR53 F<br>1SR53_P<br>IG | ILVc<br>DLG<br>NPM<br>k     | 88% | 43.7 | 53.43024 | Ref | -0.19 | -0.14 | -0.03 | -0.13  | -0.02 | 0.074 | 0.17  | 9620 | 8180 | 9170 | 11100 | 11500 | 10800 | 12000 | 12800 | 619.7 | 1856   | 3 | 0.0289 | 15.54 |
| Uncharacterized protein (Fragment)<br>OS=Bos taurus<br>GN=Bt.27462 PE=3<br>SV=1 | tr F1MK4<br>4 F1MK4<br>4_BOVIN,<br>tr F1PY05<br> F1PY05_<br>CANFA,tr <br>F1SR53 F<br>1SR53_P<br>IG | qATL<br>TQTL<br>LIQn<br>GAR | 85% | 40.7 | 53.28237 | Ref | 0.049 | -0.27 | 0.22  | -0.11  | -0.06 | -0.24 | 0.035 | 2940 | 2750 | 2390 | 3760  | 3300  | 2980  | 2760  | 3310  | 967   | 1932.1 | 2 | 0.0118 | 6.111 |
| Uncharacterized protein (Fragment)<br>OS=Bos taurus<br>GN=Bt.27462 PE=3<br>SV=1 | tr F1MK4<br>4 F1MK4<br>4_BOVIN,<br>tr F1PY05<br> F1PY05_<br>CANFA,tr <br>F1SR53 F<br>1SR53_P<br>IG | sLQ<br>WFG<br>ATV<br>R      | 61% | 33.4 | 52.11505 | Ref | 0.34  | -0.04 | -0.14 | -0.11  | -0.16 | -0.44 | -0.09 | 1810 | 1800 | 1510 | 1580  | 1770  | 1490  | 1290  | 1630  | 490.3 | 1467.8 | 3 | 0.0085 | 5.805 |
| Uncharacterized protein (Fragment)<br>OS=Bos taurus<br>GN=Bt.27462 PE=3<br>SV=1 | tr F1MK4<br>4 F1MK4<br>4_BOVIN,<br>tr F1PY05<br> F1PY05_<br>CANFA,tr <br>F1SR53 F<br>1SR53_P<br>IG | tiQF<br>DFQI<br>LSk         | 82% | 39.9 | 52.94389 | Ref | 0.028 | -0.11 | 0.041 | -0.099 | -0.27 | -0.04 | 0.017 | 1170 | 1020 | 1000 | 1250  | 1250  | 968   | 1190  | 1230  | 650   | 1947.1 | 3 | 0.0209 | 10.7  |

|                                                                                              |                                                                      |                |     |      |          |     |       |       |       |        |       |       |       |       |       |       |        |        |       |       |        |       |        |   |        |       |
|----------------------------------------------------------------------------------------------|----------------------------------------------------------------------|----------------|-----|------|----------|-----|-------|-------|-------|--------|-------|-------|-------|-------|-------|-------|--------|--------|-------|-------|--------|-------|--------|---|--------|-------|
| Uncharacterized protein (Fragment)<br>OS=Bos taurus<br>GN=Bt.27462 PE=3<br>SV=1              | tr F1MK44 F1MK44_BOVIN, tr F1PY05 F1PY05_CANFA, tr F1SR53 F1SR53_PIG | tIQFDFQILSK    | 81% | 39.2 | 52.59506 | Ref | 0.021 | -0.31 | -0.05 | -0.22  | -0.18 | -0.03 | 0.23  | 1570  | 1310  | 1130  | 1520   | 1490   | 1340  | 1550  | 1840   | 650   | 1947.1 | 3 | 0.0093 | 4.789 |
| Uncharacterized protein (Fragment)<br>OS=Bos taurus<br>GN=Bt.27462 PE=3<br>SV=1              | tr F1MK44 F1MK44_BOVIN, tr F1PY05 F1PY05_CANFA, tr F1SR53 F1SR53_PIG | vTAPPEAEYSGLVR | 94% | 50.3 | 53.36808 | Ref | -0.18 | -0.15 | -0.09 | 0.14   | -0.25 | -0.01 | 0.17  | 12500 | 10100 | 11200 | 13100  | 16900  | 11300 | 14000 | 15700  | 598.3 | 1792   | 3 | 0.0123 | 6.842 |
| Neuroblast differentiation-associated protein<br>AHNAK OS=Homo sapiens<br>GN=AHNAK PE=1 SV=2 | sp Q09666 AHNK_HUMAN                                                 | aDIDVSGPk      | 93% | 44.2 | 51.98503 | Ref | -0.76 | -0.45 | -0.28 | -0.073 | -0.12 | -0.88 | -0.43 | 2E+05 | 82600 | 1E+05 | 141000 | 178000 | 2E+05 | 92800 | 126000 | 755.4 | 1508.9 | 2 | 0.0151 | 10.01 |
| Neuroblast differentiation-associated protein<br>AHNAK OS=Homo sapiens<br>GN=AHNAK PE=1 SV=2 | sp Q09666 AHNK_HUMAN                                                 | gEGPDVDVSLPk   | 95% | 63.3 | 53.26295 | Ref | -0.65 | -0.29 | -0.49 | -0.3   | -0.21 | -0.54 | -0.57 | 19400 | 9740  | 13600 | 13300  | 16700  | 15500 | 12900 | 12500  | 911   | 1820   | 2 | 0.0138 | 7.56  |

|                                                                                        |                      |                                        |     |      |          |     |       |       |       |        |       |       |       |       |       |       |       |       |       |       |       |       |        |   |        |       |
|----------------------------------------------------------------------------------------|----------------------|----------------------------------------|-----|------|----------|-----|-------|-------|-------|--------|-------|-------|-------|-------|-------|-------|-------|-------|-------|-------|-------|-------|--------|---|--------|-------|
| Neuroblast differentiation-associated protein AHNAK OS=Homo sapiens GN=AHNAK PE=1 SV=2 | sp Q09666 AHNK_HUMAN | iGIP<br>GVK                            | 56% | 22.8 | 42.39399 | Ref | -0.89 | -0.28 | -0.64 | -0.29  | -0.01 | -0.43 | -0.52 | 19200 | 8520  | 14100 | 12300 | 17400 | 18400 | 14400 | 13500 | 431.3 | 1290.8 | 3 | 0.0036 | 2.804 |
| Neuroblast differentiation-associated protein AHNAK OS=Homo sapiens GN=AHNAK PE=1 SV=2 | sp Q09666 AHNK_HUMAN | iSMP<br>DIDL<br>NLkG<br>Pk             | 66% | 31.4 | 50.98433 | Ref | -0.92 | -0.48 | -0.28 | -0.043 | -0.12 | -0.54 | -0.27 | 13800 | 7750  | 11400 | 14800 | 19100 | 15900 | 12300 | 14800 | 614.1 | 2452.4 | 4 | 0.0072 | 2.934 |
| Neuroblast differentiation-associated protein AHNAK OS=Homo sapiens GN=AHNAK PE=1 SV=2 | sp Q09666 AHNK_HUMAN | iSMP<br>DIDL<br>nLkG<br>Pk             | 55% | 30.5 | 52.07734 | Ref | -0.65 | -0.59 | -0.47 | -0.18  | 0.004 | -0.38 | -0.24 | 3520  | 2540  | 2870  | 3490  | 4700  | 4670  | 3740  | 4090  | 614.4 | 2453.4 | 4 | 0.0167 | 6.816 |
| Neuroblast differentiation-associated protein AHNAK OS=Homo sapiens GN=AHNAK PE=1 SV=2 | sp Q09666 AHNK_HUMAN | vDID<br>APD<br>VDV<br>HGP<br>DWH<br>Lk | 93% | 47.8 | 55.18826 | Ref | -0.54 | -0.59 | -0.45 | -0.2   | -0.16 | -0.56 | -0.62 | 29300 | 15800 | 16500 | 20500 | 26800 | 24100 | 19100 | 18100 | 659.8 | 2635.4 | 4 | 0.0233 | 8.846 |

|                                                                                           |                                                   |                                  |     |      |          |     |       |       |       |       |       |       |       |       |       |       |       |        |       |       |       |       |        |   |        |       |
|-------------------------------------------------------------------------------------------|---------------------------------------------------|----------------------------------|-----|------|----------|-----|-------|-------|-------|-------|-------|-------|-------|-------|-------|-------|-------|--------|-------|-------|-------|-------|--------|---|--------|-------|
| Neuroblast differentiation-associated protein<br>AHNAK OS=Homo sapiens GN=AHNAK PE=1 SV=2 | sp Q09666 AHNK_HUMAN                              | vDID<br>TPDI<br>NIEG<br>SEGk     | 81% | 41.3 | 54.41505 | Ref | -0.43 | -0.47 | -0.37 | -0.38 | -0.11 | -0.28 | -0.39 | 17000 | 14100 | 14800 | 17700 | 19500  | 20500 | 19000 | 17500 | 770.7 | 2309.2 | 3 | 0.0192 | 8.296 |
| Neuroblast differentiation-associated protein<br>AHNAK OS=Homo sapiens GN=AHNAK PE=1 SV=2 | sp Q09666 AHNK_HUMAN                              | vDVE<br>GPD<br>VNIE<br>GPE<br>Gk | 95% | 63.2 | 54.5351  | Ref | -0.72 | -0.55 | -0.36 | -0.5  | -0.2  | -0.23 | -0.4  | 23400 | 11800 | 14400 | 18500 | 18500  | 19900 | 20300 | 17900 | 754.7 | 2261.2 | 3 | 0.0179 | 7.902 |
| Neuroblast differentiation-associated protein<br>AHNAK OS=Homo sapiens GN=AHNAK PE=1 SV=2 | sp Q09666 AHNK_HUMAN                              | vDVE<br>GPD<br>VNIE<br>GPE<br>Gk | 95% | 73.7 | 54.52774 | Ref | -1.1  | -0.27 | -0.5  | -0.18 | 0.091 | -0.76 | -0.39 | 1920  | 781   | 1500  | 1440  | 1980   | 2090  | 1210  | 1550  | 1132  | 2261.2 | 2 | 0.0173 | 7.656 |
| Peroxisredoxin-1<br>OS=Bos taurus GN=PRDX1 PE=2 SV=1                                      | sp Q5E947 PRDX1_BOVIN, tr F4YD22 F4YD22_B<br>UBBU | dISL<br>ADYk                     | 68% | 35.4 | 52.58649 | Ref | -0.11 | -0.11 | -0.46 | 0.26  | -0.61 | 0.059 | -0.73 | 88700 | 62000 | 67400 | 59700 | 108000 | 51500 | 85700 | 49100 | 511.6 | 1531.9 | 3 | 0.0143 | 9.309 |
| Peroxisredoxin-1<br>OS=Bos taurus GN=PRDX1 PE=2 SV=1                                      | sp Q5E947 PRDX1_BOVIN, tr F4YD22 F4YD22_B<br>UBBU | gLFII<br>DDk                     | 95% | 46   | 50.73546 | Ref | -0.11 | -0.2  | -0.29 | 0.11  | -0.36 | 0.016 | -0.64 | 39600 | 29000 | 29500 | 31100 | 45400  | 28600 | 38700 | 24300 | 765   | 1527.9 | 2 | 0.0089 | 5.806 |

|                                                           |                                                   |                                    |     |      |          |     |       |       |       |        |       |       |       |       |       |       |       |       |       |       |       |       |        |   |        |       |
|-----------------------------------------------------------|---------------------------------------------------|------------------------------------|-----|------|----------|-----|-------|-------|-------|--------|-------|-------|-------|-------|-------|-------|-------|-------|-------|-------|-------|-------|--------|---|--------|-------|
| Peroxiredoxin-1<br>OS=Bos taurus<br>GN=PRDX1 PE=2<br>SV=1 | sp Q5E947 PRDX1_BOVIN, tr F4YD22 F4YD22_B<br>UBBU | gLFII<br>DDk                       | 66% | 32.7 | 50.49458 | Ref | -0.18 | -0.19 | -0.76 | 0.14   | -0.29 | 0.066 | -0.57 | 27200 | 16700 | 18100 | 13600 | 28000 | 18200 | 24400 | 15600 | 510.3 | 1527.9 | 3 | 0.0048 | 3.155 |
| Peroxiredoxin-1<br>OS=Bos taurus<br>GN=PRDX1 PE=2<br>SV=1 | sp Q5E947 PRDX1_BOVIN, tr F4YD22 F4YD22_B<br>UBBU | gLFII<br>DDk                       | 53% | 30.1 | 50.33657 | Ref | -0.26 | -0.23 | -0.4  | 0.14   | -0.28 | 0.009 | -0.19 | 13000 | 9720  | 10800 | 10800 | 17300 | 11200 | 14400 | 12400 | 510.3 | 1527.9 | 3 | 0.0011 | 0.741 |
| Peroxiredoxin-1<br>OS=Bos taurus<br>GN=PRDX1 PE=2<br>SV=1 | sp Q5E947 PRDX1_BOVIN, tr F4YD22 F4YD22_B<br>UBBU | kQG<br>GLG<br>PMN<br>IPLIS<br>DPk  | 63% | 32   | 52.1318  | Ref | -0.07 | -0.46 | -0.23 | 0.084  | -0.35 | 0.091 | -0.44 | 4560  | 3620  | 2990  | 3940  | 5400  | 3480  | 4950  | 3410  | 670.1 | 2676.5 | 4 | 0.0377 | 14.09 |
| Peroxiredoxin-1<br>OS=Bos taurus<br>GN=PRDX1 PE=2<br>SV=1 | sp Q5E947 PRDX1_BOVIN, tr F4YD22 F4YD22_B<br>UBBU | kQG<br>GLG<br>PMN<br>IPLIS<br>DPk  | 78% | 35.5 | 51.95025 | Ref | -0.1  | -0.2  | -0.16 | -0.041 | -0.25 | -0.06 | -0.28 | 1780  | 1540  | 1560  | 1800  | 2160  | 1640  | 1950  | 1660  | 670.1 | 2676.5 | 4 | 0.0338 | 12.62 |
| Peroxiredoxin-1<br>OS=Bos taurus<br>GN=PRDX1 PE=2<br>SV=1 | sp Q5E947 PRDX1_BOVIN, tr F4YD22 F4YD22_B<br>UBBU | kQG<br>GLG<br>PMN<br>IPLIS<br>DPkR | 72% | 32.1 | 50.40329 | Ref | -0.3  | -0.35 | -0.32 | 0.23   | -0.18 | 0.14  | -0.17 | 3520  | 3170  | 3310  | 3800  | 6140  | 4020  | 5260  | 4210  | 709.2 | 2832.7 | 4 | 0.0196 | 6.929 |
| Peroxiredoxin-1<br>OS=Bos taurus<br>GN=PRDX1 PE=2<br>SV=1 | sp Q5E947 PRDX1_BOVIN, tr F4YD22 F4YD22_B<br>UBBU | IVQA<br>FQFT<br>Dk                 | 95% | 48.3 | 52.65726 | Ref | -0.2  | -0.36 | -0.15 | 0.092  | -0.27 | -0.03 | -0.41 | 7790  | 5630  | 5440  | 7070  | 9230  | 6260  | 7750  | 5880  | 903   | 1804   | 2 | 0.0131 | 7.285 |
| Peroxiredoxin-1<br>OS=Bos taurus<br>GN=PRDX1 PE=2<br>SV=1 | sp Q5E947 PRDX1_BOVIN, tr F4YD22 F4YD22_B<br>UBBU | IVQA<br>FQFT<br>Dk                 | 71% | 36   | 52.4707  | Ref | -0.15 | -0.37 | -0.37 | 0.1    | -0.4  | -0.1  | 0.11  | 31300 | 26200 | 24500 | 27500 | 42000 | 25900 | 33200 | 38200 | 602.4 | 1804   | 3 | 0.0056 | 3.106 |

|                                                           |                                               |                     |     |      |          |     |        |       |       |        |       |       |       |       |       |       |       |       |       |       |       |       |        |   |        |       |
|-----------------------------------------------------------|-----------------------------------------------|---------------------|-----|------|----------|-----|--------|-------|-------|--------|-------|-------|-------|-------|-------|-------|-------|-------|-------|-------|-------|-------|--------|---|--------|-------|
| Peroxiredoxin-1<br>OS=Bos taurus<br>GN=PRDX1 PE=2<br>SV=1 | sp Q5E947 PRDX1_BOVIN, tr F4YD22 F4YD22_BUBBU | qITIn<br>DLPV<br>GR | 87% | 40.3 | 52.30643 | Ref | -0.094 | -0.42 | -0.32 | 0.078  | -0.17 | 0.061 | -0.28 | 16100 | 14100 | 12200 | 14700 | 21400 | 15700 | 19300 | 15100 | 765.9 | 1529.9 | 2 | 0.0149 | 9.718 |
| Peroxiredoxin-1<br>OS=Bos taurus<br>GN=PRDX1 PE=2<br>SV=1 | sp Q5E947 PRDX1_BOVIN, tr F4YD22 F4YD22_BUBBU | tIAQ<br>DYG<br>VLk  | 80% | 38.3 | 52.13242 | Ref | -0.045 | -0.36 | -0.28 | 0.09   | -0.4  | 0.037 | -0.34 | 28700 | 23800 | 20700 | 24700 | 35100 | 21800 | 30900 | 23500 | 572.7 | 1715   | 3 | 0.0138 | 8.028 |
| Peroxiredoxin-1<br>OS=Bos taurus<br>GN=PRDX1 PE=2<br>SV=1 | sp Q5E947 PRDX1_BOVIN, tr F4YD22 F4YD22_BUBBU | tIAQ<br>DYG<br>VLk  | 95% | 55.4 | 52.06416 | Ref | -0.19  | -0.18 | -0.29 | 0.24   | -0.26 | -0.08 | -0.54 | 20900 | 16000 | 17400 | 18100 | 28700 | 17800 | 21000 | 15200 | 858.5 | 1715   | 2 | 0.0099 | 5.746 |
| Peroxiredoxin-1<br>OS=Bos taurus<br>GN=PRDX1 PE=2<br>SV=1 | sp Q5E947 PRDX1_BOVIN, tr F4YD22 F4YD22_BUBBU | tIAQ<br>DYG<br>VLk  | 60% | 33.1 | 52.04982 | Ref | -0.035 | -0.27 | -0.18 | -0.026 | -0.28 | 0.034 | -0.46 | 45500 | 39300 | 36100 | 43200 | 53100 | 38700 | 50400 | 35400 | 572.7 | 1715   | 3 | 0.0092 | 5.371 |



|                                                    |                                                                                                                                                                                                                   |                            |     |      |          |     |        |       |       |       |      |       |      |       |       |       |       |       |       |       |       |       |        |   |        |       |
|----------------------------------------------------|-------------------------------------------------------------------------------------------------------------------------------------------------------------------------------------------------------------------|----------------------------|-----|------|----------|-----|--------|-------|-------|-------|------|-------|------|-------|-------|-------|-------|-------|-------|-------|-------|-------|--------|---|--------|-------|
| Protein SET<br>OS=Homo sapiens<br>GN=SET PE=1 SV=3 | 5 SET_HUMAN,sp Q63945 SET_RAT,sp Q9EQU5 SET_MOUSE,tr A2BE93 A2BE93_MOUSE,tr A6NGV1 A6NGV1_HUMAN,tr B0BMV1 B0BMV1_RAT,tr B2RCXO B2RCXO_HUMAN,tr B2REB8 B2REB8_HUMAN,tr F1MCF1 F1MCF1_BOVIN,tr F1RR69 F1RR69_PIG,tr | eFHL<br>NES<br>GDP<br>SSk  | 86% | 42.8 | 53.34162 | Ref | 0.0043 | -0.29 | 0.27  | 0.043 | 0.21 | -0.38 | 0.13 | 17200 | 16600 | 14700 | 24300 | 22900 | 22500 | 15500 | 21900 | 685.7 | 2054   | 3 | 0.019  | 9.235 |
| Protein SET<br>OS=Homo sapiens<br>GN=SET PE=1 SV=3 | 5 SET_HUMAN,sp Q63945 SET_RAT,sp Q9EQU5 SET_MOUSE,tr A2BE93 A2BE93_MOUSE,tr A6NGV1 A6NGV1_HUMAN,tr B0BMV1 B0BMV1_RAT,tr B2RCXO B2RCXO_HUMAN,tr B2REB8 B2REB8_HUMAN,tr F1MCF1 F1MCF1_BOVIN,tr F1RR69 F1RR69_PIG,tr | iDFY<br>FDE<br>NPYF<br>ENk | 95% | 54.9 | 53.24791 | Ref | -0.25  | -0.15 | 0.093 | -0.12 | 0.37 | -0.48 | 0.41 | 894   | 709   | 826   | 1100  | 1040  | 1280  | 740   | 1360  | 817.1 | 2448.2 | 3 | 0.0283 | 11.53 |

|                                                    |                                                                                                                                                                                                                |                      |     |      |          |     |       |       |      |        |      |       |       |      |      |      |      |      |      |      |      |       |        |   |        |       |
|----------------------------------------------------|----------------------------------------------------------------------------------------------------------------------------------------------------------------------------------------------------------------|----------------------|-----|------|----------|-----|-------|-------|------|--------|------|-------|-------|------|------|------|------|------|------|------|------|-------|--------|---|--------|-------|
| Protein SET<br>OS=Homo sapiens<br>GN=SET PE=1 SV=3 | 5 SET_HUMAN,sp Q63945 SET_RAT,sp Q9EQU5 SET_MOUSE,tra2 BE93_MOUSE,tra6 NGV1 NGV1_HUMAN,tra B0BMV1 B0BMV1_RAT,tra B2RCXO B2RCXO_HUMAN,tra B2REB8 B2REB8_HUMAN,tra F1MCF1 F1MCF1_BOVIN,tra F1RR69 F1RR69_PIG,tra | INEQ<br>ASEE<br>ILk  | 94% | 46.7 | 53.21913 | Ref | 0.17  | -0.2  | 0.11 | -0.25  | 0.1  | -0.68 | -0.04 | 7110 | 4970 | 4150 | 5800 | 4960 | 5560 | 3370 | 5200 | 941.5 | 1881.1 | 2 | 0.0141 | 7.512 |
| Protein SET<br>OS=Homo sapiens<br>GN=SET PE=1 SV=3 | 5 SET_HUMAN,sp Q63945 SET_RAT,sp Q9EQU5 SET_MOUSE,tra2 BE93_MOUSE,tra6 NGV1 NGV1_HUMAN,tra B0BMV1 B0BMV1_RAT,tra B2RCXO B2RCXO_HUMAN,tra B2REB8 B2REB8_HUMAN,tra F1MCF1 F1MCF1_BOVIN,tra F1RR69 F1RR69_PIG,tra | INEQ<br>ASEE<br>ILkV | 91% | 45.9 | 52.99825 | Ref | -0.26 | -0.39 | 0.26 | -0.098 | 0.43 | -0.47 | 0.33  | 4960 | 3870 | 3830 | 6760 | 5820 | 7350 | 4110 | 7090 | 890.8 | 2669.5 | 3 | 0.0213 | 7.967 |

|                                                    |                                                                                                                                                                                                                   |              |     |      |          |     |       |       |       |        |      |       |      |       |      |      |       |       |       |      |       |       |        |   |        |       |
|----------------------------------------------------|-------------------------------------------------------------------------------------------------------------------------------------------------------------------------------------------------------------------|--------------|-----|------|----------|-----|-------|-------|-------|--------|------|-------|------|-------|------|------|-------|-------|-------|------|-------|-------|--------|---|--------|-------|
| Protein SET<br>OS=Homo sapiens<br>GN=SET PE=1 SV=3 | 5 SET_HUMAN,sp Q63945 SET_RAT,sp Q9EQU5 SET_MOUSE,tr A2BE93 A2BE93_MOUSE,tr A6NGV1 A6NGV1_HUMAN,tr B0BMV1 B0BMV1_RAT,tr B2RCXO B2RCXO_HUMAN,tr B2REB8 B2REB8_HUMAN,tr F1MCF1 F1MCF1_BOVIN,tr F1RR69 F1RR69_PIG,tr | IRQP<br>FFQk | 52% | 28   | 50.22301 | Ref | -0.4  | -0.48 | -0.04 | -0.099 | 0.26 | -0.15 | 0.85 | 2660  | 2500 | 2580 | 3920  | 4140  | 4630  | 3650 | 7250  | 418.8 | 1671   | 4 | 0.0012 | 0.738 |
| Protein SET<br>OS=Homo sapiens<br>GN=SET PE=1 SV=3 | 5 SET_HUMAN,sp Q63945 SET_RAT,sp Q9EQU5 SET_MOUSE,tr A2BE93 A2BE93_MOUSE,tr A6NGV1 A6NGV1_HUMAN,tr B0BMV1 B0BMV1_RAT,tr B2RCXO B2RCXO_HUMAN,tr B2REB8 B2REB8_HUMAN,tr F1MCF1 F1MCF1_BOVIN,tr F1RR69 F1RR69_PIG,tr | sSQT<br>QNK  | 54% | 31.6 | 51.65025 | Ref | -0.25 | -0.22 | 0.02  | -0.24  | 0.49 | -0.2  | 0.25 | 10100 | 7660 | 8500 | 11200 | 10300 | 14900 | 9670 | 13200 | 467.6 | 1399.8 | 3 | 0.0124 | 8.862 |

|                                                    |                                                                                                                                                                                                                    |                    |     |      |          |     |        |       |      |       |      |       |      |      |      |      |      |      |      |      |      |       |        |   |        |       |
|----------------------------------------------------|--------------------------------------------------------------------------------------------------------------------------------------------------------------------------------------------------------------------|--------------------|-----|------|----------|-----|--------|-------|------|-------|------|-------|------|------|------|------|------|------|------|------|------|-------|--------|---|--------|-------|
| Protein SET<br>OS=Homo sapiens<br>GN=SET PE=1 SV=3 | 5 SET_HUMAN,sp Q63945 SET_RAT,sp Q9EQU5 SET_MOUSE,tra A2BE93 MOUSE,tra A6NGV1 A6NGV1_HUMAN,tra B0BMV1 B0BMV1_RAT,tra B2RCXO B2RCXO_HUMAN,tra B2REB8 B2REB8_HUMAN,tra F1MCF1 F1MCF1_BOVIN,tra F1RR69 F1RR69_PIG,tra | sSQT<br>Qnk        | 56% | 31.8 | 51.6249  | Ref | -0.078 | -0.37 | 0.1  | -0.22 | 0.44 | -0.71 | 0.48 | 1010 | 863  | 767  | 1190 | 1050 | 1450 | 682  | 1540 | 701.4 | 1400.8 | 2 | 0.0021 | 1.467 |
| Protein SET<br>OS=Homo sapiens<br>GN=SET PE=1 SV=3 | 5 SET_HUMAN,sp Q63945 SET_RAT,sp Q9EQU5 SET_MOUSE,tra A2BE93 MOUSE,tra A6NGV1 A6NGV1_HUMAN,tra B0BMV1 B0BMV1_RAT,tra B2RCXO B2RCXO_HUMAN,tra B2REB8 B2REB8_HUMAN,tra F1MCF1 F1MCF1_BOVIN,tra F1RR69 F1RR69_PIG,tra | VEVT<br>EFED<br>Ik | 95% | 58.3 | 53.26639 | Ref | -0.019 | -0.37 | 0.21 | 0.077 | 0.19 | -0.54 | 0.1  | 4650 | 3600 | 3050 | 5130 | 5170 | 4890 | 3080 | 4770 | 909   | 1816   | 2 | 0.02   | 11.01 |

|                                                    |                                                                                                                                                                                                                                                                                                                           |                    |     |      |          |     |       |       |      |        |      |       |      |       |       |       |       |       |       |       |        |       |      |   |        |       |
|----------------------------------------------------|---------------------------------------------------------------------------------------------------------------------------------------------------------------------------------------------------------------------------------------------------------------------------------------------------------------------------|--------------------|-----|------|----------|-----|-------|-------|------|--------|------|-------|------|-------|-------|-------|-------|-------|-------|-------|--------|-------|------|---|--------|-------|
| Protein SET<br>OS=Homo sapiens<br>GN=SET PE=1 SV=3 | 5 SET_HU<br>MAN,sp <br>Q63945 S<br>ET_RAT,s<br>p Q9EQU<br>5 SET_M<br>OUSE,tr A<br>2BE93 A2<br>BE93_MO<br>USE,tr A6<br>NGV1 A6<br>NGV1_HU<br>MAN,tr B<br>OBMV1 B<br>OBMV1_R<br>AT,tr B2R<br>CX0 B2RC<br>X0_HUMA<br>N,tr B2RE<br>B8 B2REB<br>8_HUMA<br>N,tr F1M<br>CF1 F1M<br>CF1_BOVI<br>N,tr F1RR<br>69 F1RR6<br>9_PIG,tr | VEVT<br>EFED<br>ik | 95% | 59   | 53.29506 | Ref | -0.31 | -0.23 | 0.27 | -0.097 | 0.41 | -0.68 | 0.29 | 18100 | 12700 | 14600 | 23100 | 19700 | 24500 | 12000 | 23400  | 909   | 1816 | 2 | 0.0179 | 9.863 |
| Protein SET<br>OS=Homo sapiens<br>GN=SET PE=1 SV=3 | 5 SET_HU<br>MAN,sp <br>Q63945 S<br>ET_RAT,s<br>p Q9EQU<br>5 SET_M<br>OUSE,tr A<br>2BE93 A2<br>BE93_MO<br>USE,tr A6<br>NGV1 A6<br>NGV1_HU<br>MAN,tr B<br>OBMV1 B<br>OBMV1_R<br>AT,tr B2R<br>CX0 B2RC<br>X0_HUMA<br>N,tr B2RE<br>B8 B2REB<br>8_HUMA<br>N,tr F1M<br>CF1 F1M<br>CF1_BOVI<br>N,tr F1RR<br>69 F1RR6<br>9_PIG,tr | VEVT<br>EFED<br>ik | 94% | 50.1 | 53.36059 | Ref | -0.27 | -0.42 | 0.16 | -0.17  | 0.46 | -0.84 | 0.46 | 80000 | 52700 | 51500 | 86500 | 75900 | 1E+05 | 43400 | 106000 | 606.3 | 1816 | 3 | 0.0172 | 9.459 |

|                                                    |                                                                                                                                                                                                                 |            |    |     |      |          |     |        |       |       |        |      |       |      |       |       |       |       |       |       |       |       |       |      |   |        |       |
|----------------------------------------------------|-----------------------------------------------------------------------------------------------------------------------------------------------------------------------------------------------------------------|------------|----|-----|------|----------|-----|--------|-------|-------|--------|------|-------|------|-------|-------|-------|-------|-------|-------|-------|-------|-------|------|---|--------|-------|
| Protein SET<br>OS=Homo sapiens<br>GN=SET PE=1 SV=3 | 5 SET_HUMAN,sp Q63945 SET_RAT,sp Q9EQU5 SET_MOUSE,tra2 BE93_MOUSE,tra6 NGV1 ANGV1_HUMAN,tra B0BMV1 B0BMV1_RAT,tra B2RCXO B2RCXO_HUMAN,tra B2REB8 B2REB8_HUMAN,tra F1MCF1 F1MCF1_BOVIN,tra F1RR69 F1RR69_PIG,tra | VEVTEFEFED | ik | 94% | 50.1 | 53.33179 | Ref | -0.066 | -0.42 | 0.049 | -0.044 | 0.44 | -1.1  | 0.46 | 62000 | 47300 | 40100 | 62400 | 64500 | 79000 | 27800 | 82500 | 606.3 | 1816 | 3 | 0.0166 | 9.162 |
| Protein SET<br>OS=Homo sapiens<br>GN=SET PE=1 SV=3 | 5 SET_HUMAN,sp Q63945 SET_RAT,sp Q9EQU5 SET_MOUSE,tra2 BE93_MOUSE,tra6 NGV1 ANGV1_HUMAN,tra B0BMV1 B0BMV1_RAT,tra B2RCXO B2RCXO_HUMAN,tra B2REB8 B2REB8_HUMAN,tra F1MCF1 F1MCF1_BOVIN,tra F1RR69 F1RR69_PIG,tra | VEVTEFEFED | ik | 94% | 50   | 53.30124 | Ref | 0.0072 | -0.31 | 0.009 | -0.13  | 0.31 | -0.76 | 0.4  | 21700 | 17300 | 15100 | 21100 | 21200 | 25100 | 12500 | 27700 | 606.3 | 1816 | 3 | 0.0161 | 8.864 |

|                                                                      |                                                                                                                                                                                                                   |                |     |      |          |     |       |       |      |       |       |       |      |       |       |       |       |       |       |       |       |       |      |   |        |       |
|----------------------------------------------------------------------|-------------------------------------------------------------------------------------------------------------------------------------------------------------------------------------------------------------------|----------------|-----|------|----------|-----|-------|-------|------|-------|-------|-------|------|-------|-------|-------|-------|-------|-------|-------|-------|-------|------|---|--------|-------|
| Protein SET<br>OS=Homo sapiens<br>GN=SET PE=1 SV=3                   | 5 SET_HUMAN,sp Q63945 SET_RAT,sp Q9EQU5 SET_MOUSE,tr A2BE93 A2BE93_MOUSE,tr A6NGV1 A6NGV1_HUMAN,tr B0BMV1 B0BMV1_RAT,tr B2RCXO B2RCXO_HUMAN,tr B2REB8 B2REB8_HUMAN,tr F1MCF1 F1MCF1_BOVIN,tr F1RR69 F1RR69_PIG,tr | VEVTEFEFDik    | 59% | 34.1 | 53.29247 | Ref | 0.021 | -0.09 | 0.11 | -0.11 | -0.02 | -0.12 | 0.15 | 2190  | 1930  | 1940  | 2490  | 2370  | 2200  | 2150  | 2570  | 606.3 | 1816 | 3 | 0.0146 | 8.055 |
| 60S ribosomal protein L23a<br>OS=Homo sapiens<br>GN=RPL23A PE=1 SV=1 | 0 RL23A_HUMAN,sp P62751 RL23A_MOUSE,sp P62752 RL23A_RAT,sp Q24JY1 RL23A_BOVIN,tr A8MUS3 A8MUS3_HUMAN,tr A8MXA8 A8MXA8_HUMAN,tr B5DES1 B5DES1_RAT,tr D2GU25 D2GU25_AILME,tr D3YU45 D3YU45_MOUSE,tr D3YWP3 D3YWP    | fPLT<br>TESAMk | 95% | 53.5 | 53.06095 | Ref | 0.18  | 0.61  | 0.94 | 0.76  | 1.2   | 0.44  | 1.2  | 11800 | 12800 | 18600 | 26400 | 25600 | 29500 | 18700 | 31200 | 867   | 1732 | 2 | 0.0152 | 8.794 |

|                                                                         |                                                                                                                                                                                                                      |                            |     |      |          |     |      |      |      |      |     |      |     |      |      |      |      |      |      |      |      |       |        |   |        |       |
|-------------------------------------------------------------------------|----------------------------------------------------------------------------------------------------------------------------------------------------------------------------------------------------------------------|----------------------------|-----|------|----------|-----|------|------|------|------|-----|------|-----|------|------|------|------|------|------|------|------|-------|--------|---|--------|-------|
| 60S ribosomal protein L23a<br>OS=Homo sapiens<br>GN=RPL23A PE=1<br>SV=1 | 0 RL23A_HUMAN,sp P62751 RL23A_MOUSE,sp P62752 RL23A_RAT,sp Q24JY1 RL23A_BOVIN,tra A8MUS3 A8MUS3_HUMAN,tra A8MXA8 A8MXA8_HUMAN,tra B5DES1 B5DES1_RAT,tra D2GU25 D2GU25_AILME,tra D3YU45 D3YU45_MOUSE,tra D3YWP3 D3YWP | fPLT<br>TESA<br>Mk         | 95% | 50.7 | 53.18089 | Ref | 0.14 | 0.75 | 0.83 | 0.78 | 1.1 | 0.36 | 1.2 | 3030 | 2910 | 4810 | 5710 | 6070 | 6840 | 4140 | 7240 | 867   | 1731.9 | 2 | 0.0226 | 13.02 |
| 60S ribosomal protein L23a<br>OS=Homo sapiens<br>GN=RPL23A PE=1<br>SV=1 | 0 RL23A_HUMAN,sp P62751 RL23A_MOUSE,sp P62752 RL23A_RAT,sp Q24JY1 RL23A_BOVIN,tra A8MUS3 A8MUS3_HUMAN,tra A8MXA8 A8MXA8_HUMAN,tra B5DES1 B5DES1_RAT,tra D2GU25 D2GU25_AILME,tra D3YU45 D3YU45_MOUSE,tra D3YWP3 D3YWP | iEDN<br>NTLV<br>FIVD<br>Vk | 95% | 53.9 | 53.45415 | Ref | 0.54 | 0.67 | 0.73 | 0.5  | 1   | 0.65 | 1   | 826  | 813  | 964  | 1130 | 1060 | 1340 | 1080 | 1400 | 743.1 | 2226.3 | 3 | 0.0169 | 7.582 |



|                                                                         |                                                                                                                                                                                                                      |                            |     |      |          |     |      |      |      |      |      |      |      |     |     |     |     |     |     |     |     |       |        |   |        |       |
|-------------------------------------------------------------------------|----------------------------------------------------------------------------------------------------------------------------------------------------------------------------------------------------------------------|----------------------------|-----|------|----------|-----|------|------|------|------|------|------|------|-----|-----|-----|-----|-----|-----|-----|-----|-------|--------|---|--------|-------|
| 60S ribosomal protein L23a<br>OS=Homo sapiens<br>GN=RPL23A PE=1<br>SV=1 | 0 RL23A_HUMAN,sp P62751 RL23A_MOUSE,sp P62752 RL23A_RAT,sp Q24JY1 RL23A_BOVIN,tra A8MUS3 A8MUS3_HUMAN,tra A8MXA8 A8MXA8_HUMAN,tra B5DES1 B5DES1_RAT,tra D2GU25 D2GU25_AILME,tra D3YU45 D3YU45_MOUSE,tra D3YWP3 D3YWP | iEDN<br>NTLV<br>FIVD<br>Vk | 95% | 55.9 | 53.3086  | Ref | 0.55 | 0.59 | 0.8  | 0.74 | 1    | 0.52 | 0.99 | 371 | 394 | 441 | 574 | 603 | 653 | 474 | 649 | 743.1 | 2226.3 | 3 | 0.0118 | 5.279 |
| 60S ribosomal protein L23a<br>OS=Homo sapiens<br>GN=RPL23A PE=1<br>SV=1 | 0 RL23A_HUMAN,sp P62751 RL23A_MOUSE,sp P62752 RL23A_RAT,sp Q24JY1 RL23A_BOVIN,tra A8MUS3 A8MUS3_HUMAN,tra A8MXA8 A8MXA8_HUMAN,tra B5DES1 B5DES1_RAT,tra D2GU25 D2GU25_AILME,tra D3YU45 D3YU45_MOUSE,tra D3YWP3 D3YWP | iEDN<br>NTLV<br>FIVD<br>Vk | 67% | 35.6 | 53.17512 | Ref | 0.95 | 0.78 | 0.71 | 0.59 | 0.74 | 0.44 | 1    | 206 | 279 | 269 | 289 | 294 | 283 | 241 | 352 | 743.1 | 2226.3 | 3 | 0.0088 | 3.972 |

|                                                                         |                                                                                                                                                                                                                      |   |     |      |          |     |       |      |      |      |      |      |     |      |      |      |      |      |      |      |      |       |        |   |        |       |
|-------------------------------------------------------------------------|----------------------------------------------------------------------------------------------------------------------------------------------------------------------------------------------------------------------|---|-----|------|----------|-----|-------|------|------|------|------|------|-----|------|------|------|------|------|------|------|------|-------|--------|---|--------|-------|
| 60S ribosomal protein L23a<br>OS=Homo sapiens<br>GN=RPL23A PE=1<br>SV=1 | 0 RL23A_HUMAN,sp P62751 RL23A_MOUSE,sp P62752 RL23A_RAT,sp Q24JY1 RL23A_BOVIN,tra A8MUS3 A8MUS3_HUMAN,tra A8MXA8 A8MXA8_HUMAN,tra B5DES1 B5DES1_RAT,tra D2GU25 D2GU25_AILME,tra D3YU45 D3YU45_MOUSE,tra D3YWP3 D3YWP | k | 95% | 54.2 | 50.85951 | Ref | 0.064 | 0.59 | 0.97 | 0.64 | 1.2  | 0.32 | 1.3 | 1900 | 1770 | 2760 | 4050 | 3560 | 4700 | 2580 | 4950 | 887.2 | 2658.6 | 3 | 0.0171 | 6.426 |
| 60S ribosomal protein L23a<br>OS=Homo sapiens<br>GN=RPL23A PE=1<br>SV=1 | 0 RL23A_HUMAN,sp P62751 RL23A_MOUSE,sp P62752 RL23A_RAT,sp Q24JY1 RL23A_BOVIN,tra A8MUS3 A8MUS3_HUMAN,tra A8MXA8 A8MXA8_HUMAN,tra B5DES1 B5DES1_RAT,tra D2GU25 D2GU25_AILME,tra D3YU45 D3YU45_MOUSE,tra D3YWP3 D3YWP | k | 95% | 48   | 52.12914 | Ref | 0.28  | 0.59 | 0.83 | 0.61 | 0.95 | 0.5  | 1.3 | 585  | 532  | 716  | 950  | 899  | 993  | 761  | 1340 | 665.9 | 2659.5 | 4 | 0.026  | 9.779 |

|                                                                         |                                                                                                                                                                                                                                  |                           |     |      |          |     |        |      |      |      |     |      |     |       |       |       |       |       |       |       |       |       |        |   |        |       |
|-------------------------------------------------------------------------|----------------------------------------------------------------------------------------------------------------------------------------------------------------------------------------------------------------------------------|---------------------------|-----|------|----------|-----|--------|------|------|------|-----|------|-----|-------|-------|-------|-------|-------|-------|-------|-------|-------|--------|---|--------|-------|
| 60S ribosomal protein L23a<br>OS=Homo sapiens<br>GN=RPL23A PE=1<br>SV=1 | 0 RL23A_HUMAN,sp P62751 RL23A_MOUSE,sp P62752 RL23A_RAT,sp Q24JY1 RL23A_BOVIN,trans A8MUS3 A8MUS3_HUMAN,trans A8MXA8 A8MXA8_HUMAN,trans B5DES1 B5DES1_RAT,trans D2GU25 D2GU25_AILME,trans D3YU45 D3YU45_MOUSE,trans D3YWP3 D3YWP | IAPD<br>YDAL<br>DVA<br>Nk | 80% | 40.1 | 53.91264 | Ref | 0.36   | 0.7  | 0.53 | 0.32 | 1.2 | 0.48 | 1.2 | 11200 | 8330  | 11500 | 11400 | 10900 | 17600 | 11100 | 17700 | 671.7 | 2012.1 | 3 | 0.0207 | 10.28 |
| 60S ribosomal protein L23a<br>OS=Homo sapiens<br>GN=RPL23A PE=1<br>SV=1 | 0 RL23A_HUMAN,sp P62751 RL23A_MOUSE,sp P62752 RL23A_RAT,sp Q24JY1 RL23A_BOVIN,trans A8MUS3 A8MUS3_HUMAN,trans A8MXA8 A8MXA8_HUMAN,trans B5DES1 B5DES1_RAT,trans D2GU25 D2GU25_AILME,trans D3YU45 D3YU45_MOUSE,trans D3YWP3 D3YWP | IAPD<br>YDAL<br>DVA<br>Nk | 80% | 40.3 | 53.87375 | Ref | -0.028 | 0.85 | 0.97 | 0.59 | 1.2 | 0.25 | 1.3 | 26500 | 25800 | 51400 | 63000 | 53100 | 71200 | 38400 | 77900 | 671.7 | 2012.1 | 3 | 0.0192 | 9.545 |

|                                                                         |                                                                                                                                                                                                                                  |                           |     |      |          |     |        |      |      |      |     |      |     |      |      |      |       |       |       |      |       |      |        |   |        |       |
|-------------------------------------------------------------------------|----------------------------------------------------------------------------------------------------------------------------------------------------------------------------------------------------------------------------------|---------------------------|-----|------|----------|-----|--------|------|------|------|-----|------|-----|------|------|------|-------|-------|-------|------|-------|------|--------|---|--------|-------|
| 60S ribosomal protein L23a<br>OS=Homo sapiens<br>GN=RPL23A PE=1<br>SV=1 | 0 RL23A_HUMAN,sp P62751 RL23A_MOUSE,sp P62752 RL23A_RAT,sp Q24JY1 RL23A_BOVIN,trans A8MUS3 A8MUS3_HUMAN,trans A8MXA8 A8MXA8_HUMAN,trans B5DES1 B5DES1_RAT,trans D2GU25 D2GU25_AILME,trans D3YU45 D3YU45_MOUSE,trans D3YWP3 D3YWP | IAPD<br>YDAL<br>DVA<br>Nk | 95% | 52.9 | 53.86453 | Ref | -0.083 | 0.69 | 0.95 | 0.68 | 1.3 | 0.39 | 1.3 | 3440 | 3560 | 6580 | 8870  | 8120  | 10800 | 6030 | 11100 | 1007 | 2012.1 | 2 | 0.0185 | 9.205 |
| 60S ribosomal protein L23a<br>OS=Homo sapiens<br>GN=RPL23A PE=1<br>SV=1 | 0 RL23A_HUMAN,sp P62751 RL23A_MOUSE,sp P62752 RL23A_RAT,sp Q24JY1 RL23A_BOVIN,trans A8MUS3 A8MUS3_HUMAN,trans A8MXA8 A8MXA8_HUMAN,trans B5DES1 B5DES1_RAT,trans D2GU25 D2GU25_AILME,trans D3YU45 D3YU45_MOUSE,trans D3YWP3 D3YWP | IAPD<br>YDAL<br>DVA<br>Nk | 95% | 63.1 | 53.87865 | Ref | -0.003 | 0.7  | 0.87 | 0.72 | 1.3 | 0.35 | 1.2 | 4720 | 4540 | 8010 | 10100 | 10100 | 12900 | 7100 | 13000 | 1007 | 2012.1 | 2 | 0.0166 | 8.231 |

|                                                                         |                                                                                                                                                                                                                                  |                 |     |      |          |     |       |      |      |      |     |      |     |       |       |       |       |       |       |       |       |       |        |   |        |       |
|-------------------------------------------------------------------------|----------------------------------------------------------------------------------------------------------------------------------------------------------------------------------------------------------------------------------|-----------------|-----|------|----------|-----|-------|------|------|------|-----|------|-----|-------|-------|-------|-------|-------|-------|-------|-------|-------|--------|---|--------|-------|
| 60S ribosomal protein L23a<br>OS=Homo sapiens<br>GN=RPL23A PE=1<br>SV=1 | 0 RL23A_HUMAN,sp P62751 RL23A_MOUSE,sp P62752 RL23A_RAT,sp Q24JY1 RL23A_BOVIN,trans A8MUS3 A8MUS3_HUMAN,trans A8MXA8 A8MXA8_HUMAN,trans B5DES1 B5DES1_RAT,trans D2GU25 D2GU25_AILME,trans D3YU45 D3YU45_MOUSE,trans D3YWP3 D3YWP | YDI<br>DVA<br>k | 52% | 31.4 | 51.7149  | Ref | 0.3   | 0.75 | 0.73 | 0.57 | 1   | 0.56 | 1.1 | 2800  | 2130  | 3150  | 3480  | 3440  | 4070  | 3120  | 4400  | 515.6 | 1543.9 | 3 | 0.0219 | 14.18 |
| 60S ribosomal protein L23a<br>OS=Homo sapiens<br>GN=RPL23A PE=1<br>SV=1 | 0 RL23A_HUMAN,sp P62751 RL23A_MOUSE,sp P62752 RL23A_RAT,sp Q24JY1 RL23A_BOVIN,trans A8MUS3 A8MUS3_HUMAN,trans A8MXA8 A8MXA8_HUMAN,trans B5DES1 B5DES1_RAT,trans D2GU25 D2GU25_AILME,trans D3YU45 D3YU45_MOUSE,trans D3YWP3 D3YWP | YDI<br>DVA<br>k | 89% | 40.6 | 51.57871 | Ref | 0.037 | 0.79 | 0.84 | 0.69 | 1.2 | 0.38 | 1.2 | 13200 | 12300 | 22400 | 26100 | 25800 | 33000 | 19100 | 33200 | 773   | 1543.9 | 2 | 0.0187 | 12.07 |

|                                                                             |                                           |                           |     |      |          |     |       |       |       |        |       |       |       |       |       |       |       |       |       |       |       |       |        |   |        |       |
|-----------------------------------------------------------------------------|-------------------------------------------|---------------------------|-----|------|----------|-----|-------|-------|-------|--------|-------|-------|-------|-------|-------|-------|-------|-------|-------|-------|-------|-------|--------|---|--------|-------|
| Peptidyl-prolyl cis-trans isomerase B<br>OS=Bos taurus<br>GN=PPIB PE=1 SV=4 | sp P80311 PPIB_BOVIN, tr F7DYN1 F7DYN1_OR | dFMI<br>QGG<br>DFTR       | 50% | 29.3 | 50.08979 | Ref | 0.19  | 0.022 | -0.06 | -0.28  | -0.45 | -0.06 | -0.79 | 1370  | 1240  | 1200  | 1270  | 1200  | 929   | 1270  | 764   | 795.9 | 1589.8 | 2 | 0.0157 | 9.882 |
| Peptidyl-prolyl cis-trans isomerase B<br>OS=Bos taurus<br>GN=PPIB PE=1 SV=4 | sp P80311 PPIB_BOVIN, tr F7DYN1 F7DYN1_OR | dTnG<br>SQFF<br>ITTV      | 92% | 49   | 54.20738 | Ref | -0.34 | 0.022 | -0.19 | -0.38  | -0.5  | -0    | -0.17 | 31100 | 17000 | 23800 | 23100 | 22200 | 17900 | 26400 | 23300 | 689.7 | 2066.1 | 3 | 0.0162 | 7.843 |
| Peptidyl-prolyl cis-trans isomerase B<br>OS=Bos taurus<br>GN=PPIB PE=1 SV=4 | sp P80311 PPIB_BOVIN, tr F7DYN1 F7DYN1_OR | dTnG<br>SQFF<br>ITTV      | 95% | 53.1 | 54.2374  | Ref | -0.2  | -0.15 | -0.13 | -0.2   | -0.3  | 0.099 | -0.56 | 2360  | 1520  | 1700  | 1940  | 2030  | 1660  | 2280  | 1440  | 1034  | 2066.1 | 2 | 0.0158 | 7.666 |
| Peptidyl-prolyl cis-trans isomerase B<br>OS=Bos taurus<br>GN=PPIB PE=1 SV=4 | sp P80311 PPIB_BOVIN, tr F7DYN1 F7DYN1_OR | dTnG<br>SQFF<br>ITTV      | 95% | 66.1 | 54.10729 | Ref | 0.01  | 0.085 | -0.13 | -0.18  | -0.39 | -0.03 | -0.66 | 2520  | 2070  | 2370  | 2280  | 2440  | 1840  | 2460  | 1580  | 1034  | 2066.1 | 2 | 0.0036 | 1.764 |
| Peptidyl-prolyl cis-trans isomerase B<br>OS=Bos taurus<br>GN=PPIB PE=1 SV=4 | sp P80311 PPIB_BOVIN, tr F7DYN1 F7DYN1_OR | hYGP<br>GWV<br>SMA<br>NAG | 90% | 46.5 | 53.84649 | Ref | 0.18  | -0.16 | -0.17 | -0.083 | -0.34 | 0.007 | -0.4  | 11600 | 12800 | 11000 | 12200 | 14300 | 10500 | 13900 | 10400 | 695   | 2082.1 | 3 | 0.0157 | 7.526 |

|                                                                             |                                           |                           |     |      |          |     |        |       |       |        |       |       |       |      |      |      |      |       |      |       |      |       |        |   |        |       |
|-----------------------------------------------------------------------------|-------------------------------------------|---------------------------|-----|------|----------|-----|--------|-------|-------|--------|-------|-------|-------|------|------|------|------|-------|------|-------|------|-------|--------|---|--------|-------|
| Peptidyl-prolyl cis-trans isomerase B<br>OS=Bos taurus<br>GN=PPIB PE=1 SV=4 | sp P80311 PPIB_BOVIN, tr F7DYN1 F7DYN1_OR | tVDN<br>FVAL<br>ATG<br>Ek | 86% | 43   | 53.53995 | Ref | -0.15  | -0.47 | -0.5  | 0.095  | -0.31 | 0.17  | 0.001 | 8150 | 6580 | 5740 | 6310 | 10500 | 6910 | 10100 | 8890 | 658.4 | 1972.1 | 3 | 0.0152 | 7.694 |
| Peptidyl-prolyl cis-trans isomerase B<br>OS=Bos taurus<br>GN=PPIB PE=1 SV=4 | sp P80311 PPIB_BOVIN, tr F7DYN1 F7DYN1_OR | tVDN<br>FVAL<br>ATG<br>Ek | 95% | 65   | 53.41892 | Ref | 0.0073 | -0.05 | -0.08 | -0.2   | -0.48 | 0.078 | -0.47 | 6640 | 5750 | 5990 | 6610 | 6700  | 4810 | 7380  | 5020 | 987.1 | 1972.1 | 2 | 0.0148 | 7.478 |
| Peptidyl-prolyl cis-trans isomerase B<br>OS=Bos taurus<br>GN=PPIB PE=1 SV=4 | sp P80311 PPIB_BOVIN, tr F7DYN1 F7DYN1_OR | tVDn<br>FVAL<br>ATG<br>Ek | 94% | 51.2 | 53.70056 | Ref | -0.11  | -0.24 | -0.13 | -0.2   | -0.25 | 0.19  | -0.25 | 9100 | 8020 | 7900 | 9630 | 10100 | 8490 | 12100 | 8790 | 658.7 | 1973.1 | 3 | 0.0062 | 3.151 |
| Peptidyl-prolyl cis-trans isomerase B<br>OS=Bos taurus<br>GN=PPIB PE=1 SV=4 | sp P80311 PPIB_BOVIN, tr F7DYN1 F7DYN1_OR | vLEG<br>MDV<br>VR         | 95% | 57.8 | 52.17926 | Ref | -0.14  | -0.15 | -0.22 | -0.27  | -0.54 | -0.11 | -0.39 | 4360 | 2410 | 2590 | 2770 | 2960  | 2150 | 3000  | 2450 | 441.3 | 1320.7 | 3 | 0.0037 | 2.771 |
| Peptidyl-prolyl cis-trans isomerase B<br>OS=Bos taurus<br>GN=PPIB PE=1 SV=4 | sp P80311 PPIB_BOVIN, tr F7DYN1 F7DYN1_OR | vWIG<br>LFGK              | 77% | 28.5 | 43.3256  | Ref | -0.23  | -0.11 | -0.24 | -0.043 | -0.24 | 0.082 | -0.26 | 5730 | 4410 | 5180 | 5340 | 6730  | 5110 | 6690  | 5250 | 481   | 1439.9 | 3 | #####  | 0.627 |

|                                                                             |                                                                       |                    |     |      |          |     |        |       |       |        |       |       |       |       |       |       |       |        |       |       |       |       |        |   |        |       |
|-----------------------------------------------------------------------------|-----------------------------------------------------------------------|--------------------|-----|------|----------|-----|--------|-------|-------|--------|-------|-------|-------|-------|-------|-------|-------|--------|-------|-------|-------|-------|--------|---|--------|-------|
| Peptidyl-prolyl cis-trans isomerase B<br>OS=Bos taurus<br>GN=PPIB PE=1 SV=4 | sp P80311 PPIB_BOVIN, tr F7DYN1 F7DYN1_OR                             | vVIG<br>LFGk       | 80% | 30.7 | 45.19316 | Ref | 0.047  | -0.07 | -0.16 | -0.09  | -0.4  | 0.057 | -0.55 | 45800 | 41100 | 41000 | 43300 | 50200  | 35400 | 50600 | 33000 | 721   | 1439.9 | 2 | 0.0097 | 6.76  |
| Peptidyl-prolyl cis-trans isomerase B<br>OS=Bos taurus<br>GN=PPIB PE=1 SV=4 | sp P80311 PPIB_BOVIN, tr F7DYN1 F7DYN1_OR                             | vVIG<br>LFGk       | 72% | 29.2 | 45.42714 | Ref | -0.18  | -0.16 | -0.2  | -0.14  | -0.39 | 0.031 | 0.009 | 78600 | 63600 | 70000 | 76500 | 87700  | 64300 | 90000 | 88000 | 481   | 1439.9 | 3 | 0.0092 | 6.369 |
| Peptidyl-prolyl cis-trans isomerase B<br>OS=Bos taurus<br>GN=PPIB PE=1 SV=4 | sp P80311 PPIB_BOVIN, tr F7DYN1 F7DYN1_OR                             | vVIG<br>LFGk       | 85% | 32.5 | 45.42714 | Ref | 0.058  | -0.23 | -0.1  | -0.083 | -0.4  | 0.2   | -0.53 | 31500 | 30500 | 27000 | 33200 | 37100  | 26000 | 41100 | 24700 | 721   | 1439.9 | 2 | 0.009  | 6.247 |
| Heat shock protein beta-1 OS=Bos taurus GN=HSPB1 PE=2 SV=1                  | sp Q3T149 HSPB1_BOVIN, tr E1BEL7 E1BEL7_BOVIN, tr E9RHW1 E9RHW1_BOVIN | aQL<br>GGP<br>EAGk | 89% | 43.1 | 51.9664  | Ref | -0.072 | 0.15  | -0.41 | -0.055 | -0.05 | -0.59 | -0.82 | 1E+05 | 95200 | 1E+05 | 91600 | 129000 | 1E+05 | 81200 | 68800 | 512.6 | 1534.9 | 3 | 0.0158 | 10.32 |
| Heat shock protein beta-1 OS=Bos taurus GN=HSPB1 PE=2 SV=1                  | sp Q3T149 HSPB1_BOVIN, tr E1BEL7 E1BEL7_BOVIN, tr E9RHW1 E9RHW1_BOVIN | aQL<br>GGP<br>EAGk | 89% | 40.8 | 51.65289 | Ref | -0.12  | 0.086 | -0.5  | -0.15  | 0.025 | -0.5  | -0.6  | 33800 | 23600 | 29500 | 22100 | 31000  | 30600 | 22200 | 20600 | 768.5 | 1534.9 | 2 | 0.0045 | 2.922 |



|                                                            |                                                                       |                    |     |      |          |     |        |       |       |        |       |       |       |       |       |       |       |       |       |       |       |       |        |   |        |       |
|------------------------------------------------------------|-----------------------------------------------------------------------|--------------------|-----|------|----------|-----|--------|-------|-------|--------|-------|-------|-------|-------|-------|-------|-------|-------|-------|-------|-------|-------|--------|---|--------|-------|
| Heat shock protein beta-1 OS=Bos taurus GN=HSPB1 PE=2 SV=1 | sp Q3T149 HSPB1_BOVIN, tr E1BEL7 E1BEL7_BOVIN, tr E9RHW1 E9RHW1_BOVIN | dGV<br>VEIT<br>Gk  | 95% | 48.6 | 52.15791 | Ref | -0.027 | -0    | -0.37 | -0.19  | -0.08 | -0.39 | -0.62 | 25900 | 19600 | 21600 | 18800 | 23500 | 22100 | 18700 | 15800 | 763.5 | 1524.9 | 2 | 0.0053 | 3.503 |
| Heat shock protein beta-1 OS=Bos taurus GN=HSPB1 PE=2 SV=1 | sp Q3T149 HSPB1_BOVIN, tr E1BEL7 E1BEL7_BOVIN, tr E9RHW1 E9RHW1_BOVIN | IFDQ<br>AFGL<br>PR | 80% | 37.6 | 52.27427 | Ref | 0.098  | -0.05 | -0.38 | -0.16  | -0.19 | -0.29 | -0.46 | 5050  | 4700  | 4590  | 4120  | 5290  | 4510  | 4400  | 3880  | 734.4 | 1466.8 | 2 | 0.0123 | 8.389 |
| Heat shock protein beta-1 OS=Bos taurus GN=HSPB1 PE=2 SV=1 | sp Q3T149 HSPB1_BOVIN, tr E1BEL7 E1BEL7_BOVIN, tr E9RHW1 E9RHW1_BOVIN | IFDQ<br>AFGL<br>PR | 81% | 38   | 52.18806 | Ref | -0.009 | 0.01  | -0.43 | -0.069 | -0.13 | -0.3  | -0.69 | 5900  | 4730  | 5190  | 4300  | 6090  | 5110  | 4730  | 3580  | 734.4 | 1466.8 | 2 | 0.0118 | 8.048 |
| Heat shock protein beta-1 OS=Bos taurus GN=HSPB1 PE=2 SV=1 | sp Q3T149 HSPB1_BOVIN, tr E1BEL7 E1BEL7_BOVIN, tr E9RHW1 E9RHW1_BOVIN | IFDQ<br>AFGL<br>PR | 60% | 32.8 | 52.15193 | Ref | 0.075  | -0.18 | -0.21 | -0.19  | -0.08 | -0.25 | -0.4  | 1200  | 1210  | 1100  | 1210  | 1350  | 1280  | 1180  | 1060  | 734.4 | 1466.8 | 2 | 0.01   | 6.808 |
| Heat shock protein beta-1 OS=Bos taurus GN=HSPB1 PE=2 SV=1 | sp Q3T149 HSPB1_BOVIN, tr E1BEL7 E1BEL7_BOVIN, tr E9RHW1 E9RHW1_BOVIN | qDE<br>HGYI<br>SR  | 52% | 29.7 | 50.12909 | Ref | 0.054  | 0.07  | -0.7  | -0.21  | -0.07 | -0.42 | -0.26 | 5320  | 4720  | 5180  | 3400  | 5270  | 5100  | 4170  | 4630  | 704.9 | 1407.7 | 2 | 0.0113 | 8.036 |

|                                                            |                                                                       |                       |     |      |          |     |        |       |       |        |       |       |       |       |       |       |       |       |       |       |       |       |        |   |        |       |
|------------------------------------------------------------|-----------------------------------------------------------------------|-----------------------|-----|------|----------|-----|--------|-------|-------|--------|-------|-------|-------|-------|-------|-------|-------|-------|-------|-------|-------|-------|--------|---|--------|-------|
| Heat shock protein beta-1 OS=Bos taurus GN=HSPB1 PE=2 SV=1 | sp Q3T149 HSPB1_BOVIN, tr E1BEL7 E1BEL7_BOVIN, tr E9RHW1 E9RHW1_BOVIN | rVPF SLLR             | 65% | 30.1 | 48.13221 | Ref | -0.36  | 0.41  | -0.05 | -0.21  | -0.06 | -0.55 | -0.67 | 14500 | 10700 | 19900 | 16100 | 15900 | 15400 | 11500 | 10500 | 431.3 | 1290.8 | 3 | 0.0053 | 4.127 |
| Heat shock protein beta-1 OS=Bos taurus GN=HSPB1 PE=2 SV=1 | sp Q3T149 HSPB1_BOVIN, tr E1BEL7 E1BEL7_BOVIN, tr E9RHW1 E9RHW1_BOVIN | sATQ SAEI TIPV TFQ AR | 95% | 53.4 | 54.21877 | Ref | -0.021 | -0.02 | -0.06 | -0.52  | -0.06 | -0.02 | -0.56 | 8830  | 8760  | 9510  | 10400 | 8350  | 10000 | 10700 | 7330  | 708.7 | 2123.1 | 3 | 0.0143 | 6.724 |
| Heat shock protein beta-1 OS=Bos taurus GN=HSPB1 PE=2 SV=1 | sp Q3T149 HSPB1_BOVIN, tr E1BEL7 E1BEL7_BOVIN, tr E9RHW1 E9RHW1_BOVIN | sATQ SAEI TIPV TFQ AR | 95% | 55.9 | 54.13891 | Ref | -0.36  | -0.47 | -0.02 | -0.11  | -0.05 | -0.25 | -0.28 | 10900 | 6880  | 6950  | 10700 | 11000 | 10000 | 9090  | 8840  | 708.7 | 2123.1 | 3 | 0.0139 | 6.54  |
| Heat shock protein beta-1 OS=Bos taurus GN=HSPB1 PE=2 SV=1 | sp Q3T149 HSPB1_BOVIN, tr E1BEL7 E1BEL7_BOVIN, tr E9RHW1 E9RHW1_BOVIN | sATQ SAEI TIPV TFQ AR | 95% | 83.3 | 54.17614 | Ref | 0.31   | 0.033 | -0.27 | -0.092 | -0.12 | -0.86 | -0.5  | 1400  | 1650  | 1480  | 1340  | 1670  | 1440  | 898   | 1140  | 1063  | 2123.1 | 2 | 0.0124 | 5.855 |
| Heat shock protein beta-1 OS=Bos taurus GN=HSPB1 PE=2 SV=1 | sp Q3T149 HSPB1_BOVIN, tr E1BEL7 E1BEL7_BOVIN, tr E9RHW1 E9RHW1_BOVIN | sATQ SAEI TIPV TFQ AR | 95% | 67.1 | 54.08016 | Ref | -0.027 | -0.02 | -0.61 | -0.1   | 0.16  | -0.34 | -0.54 | 4900  | 4260  | 4640  | 3460  | 5420  | 5670  | 4190  | 3620  | 1063  | 2123.2 | 2 | #####  | 0.36  |

|                                                            |                                                                                                                                                                                                                          |                                  |     |      |          |     |        |       |       |        |       |       |       |       |       |       |       |       |       |       |       |       |        |   |        |       |
|------------------------------------------------------------|--------------------------------------------------------------------------------------------------------------------------------------------------------------------------------------------------------------------------|----------------------------------|-----|------|----------|-----|--------|-------|-------|--------|-------|-------|-------|-------|-------|-------|-------|-------|-------|-------|-------|-------|--------|---|--------|-------|
| Heat shock protein beta-1 OS=Bos taurus GN=HSPB1 PE=2 SV=1 | sp Q3T149 HSPB1_BOVIN, tr E1BEL7 E1BEL7_BOVIN, tr E9RHW1 E9RHW1_BOVIN                                                                                                                                                    | vSLD<br>vNH<br>FAPE<br>ELTV<br>k | 88% | 45.1 | 54.20685 | Ref | -0.071 | -0.06 | -0.4  | -0.006 | -0.13 | -0.12 | -0.51 | 4520  | 4040  | 4420  | 3900  | 5670  | 4540  | 4780  | 3610  | 802.8 | 2405.3 | 3 | 0.0188 | 7.801 |
| Annexin A2 OS=Ovis aries GN=ANXA2 PE=1 SV=1                | 69 ANXA2_SHEEP, sp P04272 ANXA2_BOVIN, sp P07355 ANXA2_HUMAN, sp P19620 ANXA2_PIG, sp Q07936 ANXA2_RAT, sp Q2Q1M6 ANXA2_CEREL, sp Q5R5A0 ANXA2_PONAB, sp Q6TEQ7 ANXA2_CANFA, tr D2HKX0 D2HKX0_AILME, tr F1S073 F1S073_PI | dALN<br>IETAI<br>k               | 94% | 45.6 | 52.02546 | Ref | -0.006 | -0.21 | 0.015 | 0.052  | 0.08  | 0.2   | -0.49 | 14400 | 12400 | 11700 | 15400 | 17400 | 15500 | 17600 | 10800 | 848.5 | 1695   | 2 | 0.0143 | 8.404 |

|                                             |                                                                                                                                                                                        |                            |     |      |         |     |      |       |       |       |       |      |       |     |     |     |     |     |     |     |     |       |      |   |        |       |
|---------------------------------------------|----------------------------------------------------------------------------------------------------------------------------------------------------------------------------------------|----------------------------|-----|------|---------|-----|------|-------|-------|-------|-------|------|-------|-----|-----|-----|-----|-----|-----|-----|-----|-------|------|---|--------|-------|
| Annexin A2 OS=Ovis aries GN=ANXA2 PE=1 SV=1 | 69 ANXA2_SHEEP,sp P04272 ANXA2_BOVIN,sp P07355 ANXA2_HUMAN,sp P19620 ANXA2_PIG,sp Q07936 ANXA2_RAT,sp Q2Q1M6 ANXA2_CEREL,sp Q5R5A0 ANXA2_PONAB,sp Q6TEQ7 ANXA2_CANFA,tr D2HKX0 D2HKX0_ | gVDE<br>VTIV<br>NILT<br>NR | 78% | 38.9 | 53.1931 | Ref | 0.34 | -0.52 | -0.11 | -0.18 | -0.47 | 0.16 | -0.19 | 299 | 245 | 147 | 219 | 229 | 164 | 266 | 206 | 616.4 | 1846 | 3 | 0.0092 | 4.982 |
| Annexin A2 OS=Ovis aries GN=ANXA2 PE=1 SV=1 | 69 ANXA2_SHEEP,sp P04272 ANXA2_BOVIN,sp P07355 ANXA2_HUMAN,sp P19620 ANXA2_PIG,sp Q07936 ANXA2_RAT,sp Q2Q1M6 ANXA2_CEREL,sp Q5R5A0 ANXA2_PONAB,sp Q6TEQ7 ANXA2_CANFA,tr D2HKX0 D2HKX0_ | gVDE<br>VTIV<br>NILT<br>NR | 95% | 62.4 | 53.1895 | Ref | 0.22 | -0.28 | 0.021 | -0.16 | -0.03 | 0.13 | -0.09 | 384 | 423 | 324 | 449 | 437 | 417 | 487 | 414 | 616.4 | 1846 | 3 | 0.0079 | 4.284 |

|                                             |                                                                                                                                                                                             |                    |     |      |          |     |                                             |                                                  |                                              |                                             |                                                   |                                                  |                                                  |                                      |                                             |                                                  |                                                   |                                             |                                                   |                                                   |                                              |       |      |   |        |       |
|---------------------------------------------|---------------------------------------------------------------------------------------------------------------------------------------------------------------------------------------------|--------------------|-----|------|----------|-----|---------------------------------------------|--------------------------------------------------|----------------------------------------------|---------------------------------------------|---------------------------------------------------|--------------------------------------------------|--------------------------------------------------|--------------------------------------|---------------------------------------------|--------------------------------------------------|---------------------------------------------------|---------------------------------------------|---------------------------------------------------|---------------------------------------------------|----------------------------------------------|-------|------|---|--------|-------|
| Annexin A2 OS=Ovis aries GN=ANXA2 PE=1 SV=1 | 69 ANXA2_SHEEP,sp P04272 ANXA2_BOVIN,sp P07355 ANXA2_HUMAN,sp P19620 ANXA2_PIG,sp Q07936 ANXA2_RAT,sp Q2Q1M6 ANXA2_CEREL,sp Q5R5A0 ANXA2_PONAB,sp Q6TEQ7 ANXA2_CANFA,tri D2HXK0 D2HXK0_gVDE | VTIV<br>NILT<br>NR | 95% | 57.6 | 53.24558 | Ref | 0.16                                        | -0.07                                            | 0.088                                        | -0.19                                       | -0.07                                             | -0.09                                            | -0.23                                            | 330                                  | 299                                         | 276                                              | 346                                               | 316                                         | 299                                               | 308                                               | 278                                          | 616.4 | 1846 | 3 | 0.0127 | 6.867 |
| Annexin A2 OS=Ovis aries GN=ANXA2 PE=1 SV=1 | 69 ANXA2_SHEEP,sp P04272 ANXA2_BOVIN,sp P07355 ANXA2_HUMAN,sp P19620 ANXA2_PIG,sp Q07936 ANXA2_RAT,sp Q2Q1M6 ANXA2_CEREL,sp Q5R5A0 ANXA2_PONAB,sp Q6TEQ7 ANXA2_CANFA,tri D2HXK0 D2HXK0_gVDE | VTIV<br>NILT<br>NR | 72% | 37   | 53.19212 | Ref | Refer<br>ence<br>Missing<br>(0.4248<br>571) | Refer<br>ence<br>Missing<br>(0.03<br>25855<br>6) | Refer<br>ence<br>Missing<br>(-<br>38583<br>) | Refer<br>ence<br>Missing<br>(0.320<br>3742) | Refer<br>ence<br>Missing<br>(0.042<br>03137<br>4) | Refer<br>ence<br>Missing<br>(0.115<br>13117<br>) | Refer<br>ence<br>Missing<br>(0.489<br>70968<br>) | No<br>Values<br>(-<br>2.9402<br>215) | Refer<br>ence<br>Missing<br>(0.424857<br>1) | Refer<br>ence<br>Missing<br>(0.03<br>25855<br>6) | Refer<br>ence<br>Missing<br>(-<br>0.4553<br>8583) | Refer<br>ence<br>Missing<br>(0.320374<br>2) | Refer<br>ence<br>Missing<br>(0.04<br>20313<br>74) | Refer<br>ence<br>Missing<br>(-<br>0.1151<br>3117) | Refer<br>ence<br>Missing<br>(0.489709<br>68) | 616.4 | 1846 | 3 | 0.0076 | 4.089 |

|                                             |                                                                                                                                                                                                                 |                                    |     |      |          |     |       |       |       |        |       |       |       |      |      |      |      |      |      |      |      |       |        |   |        |       |
|---------------------------------------------|-----------------------------------------------------------------------------------------------------------------------------------------------------------------------------------------------------------------|------------------------------------|-----|------|----------|-----|-------|-------|-------|--------|-------|-------|-------|------|------|------|------|------|------|------|------|-------|--------|---|--------|-------|
| Annexin A2 OS=Ovis aries GN=ANXA2 PE=1 SV=1 | 69 ANXA2_SHEEP,sp P04272 ANXA2_BOVIN,sp P07355 ANXA2_HUMAN,sp P19620 ANXA2_PIG,sp Q07936 ANXA2_RAT,sp Q2Q1M6 ANXA2_CEREL,sp Q5R5A0 ANXA2_PONAB,sp Q6TEQ7 ANXA2_CANFA,triD2HKX0 D2HKX0_AILME,triF15073 F15073_PI | rAED<br>GSVI<br>DYEL<br>IDQ<br>DAR | 92% | 47.6 | 52.90684 | Ref | 0.41  | 0.039 | -0.14 | -0.024 | -0.21 | -0.13 | -0.18 | 1030 | 1290 | 1090 | 1080 | 1290 | 985  | 1090 | 1040 | 790.4 | 2368.1 | 3 | 0.0375 | 15.84 |
| Annexin A2 OS=Ovis aries GN=ANXA2 PE=1 SV=1 | 69 ANXA2_SHEEP,sp P04272 ANXA2_BOVIN,sp P07355 ANXA2_HUMAN,sp P19620 ANXA2_PIG,sp Q07936 ANXA2_RAT,sp Q2Q1M6 ANXA2_CEREL,sp Q5R5A0 ANXA2_PONAB,sp Q6TEQ7 ANXA2_CANFA,triD2HKX0 D2HKX0_AILME,triF15073 F15073_PI | rAED<br>GSVI<br>DYEL<br>IDQ<br>DAR | 90% | 45.1 | 53.25678 | Ref | -0.14 | -0.02 | 0.016 | -0.28  | -0.28 | 0.23  | 0.14  | 2040 | 1620 | 1900 | 2190 | 1970 | 1720 | 2550 | 2390 | 790.4 | 2368.2 | 3 | 0.0253 | 10.66 |

|                                             |                                                                                                                                                                                                                 |                                    |     |      |          |     |       |       |       |        |       |      |       |      |      |      |      |      |      |      |      |       |        |   |       |       |
|---------------------------------------------|-----------------------------------------------------------------------------------------------------------------------------------------------------------------------------------------------------------------|------------------------------------|-----|------|----------|-----|-------|-------|-------|--------|-------|------|-------|------|------|------|------|------|------|------|------|-------|--------|---|-------|-------|
| Annexin A2 OS=Ovis aries GN=ANXA2 PE=1 SV=1 | 69 ANXA2_SHEEP,sp P04272 ANXA2_BOVIN,sp P07355 ANXA2_HUMAN,sp P19620 ANXA2_PIG,sp Q07936 ANXA2_RAT,sp Q2Q1M6 ANXA2_CEREL,sp Q5R5A0 ANXA2_PONAB,sp Q6TEQ7 ANXA2_CANFA,triD2HKX0 D2HKX0_AILME,triF15073 F15073_PI | rAED<br>GSVI<br>DYEL<br>IDQ<br>DAR | 94% | 51.6 | 53.40053 | Ref | 0.052 | -0.04 | -0.11 | -0.16  | -0.1  | 0.26 | -0.28 | 1750 | 1500 | 1530 | 1630 | 1740 | 1590 | 2130 | 1450 | 790.4 | 2368.2 | 3 | 0.02  | 8.421 |
| Annexin A2 OS=Ovis aries GN=ANXA2 PE=1 SV=1 | 69 ANXA2_SHEEP,sp P04272 ANXA2_BOVIN,sp P07355 ANXA2_HUMAN,sp P19620 ANXA2_PIG,sp Q07936 ANXA2_RAT,sp Q2Q1M6 ANXA2_CEREL,sp Q5R5A0 ANXA2_PONAB,sp Q6TEQ7 ANXA2_CANFA,triD2HKX0 D2HKX0_AILME,triF15073 F15073_PI | rAED<br>GSVI<br>DYEL<br>IDQ<br>DAR | 72% | 37.3 | 53.44856 | Ref | 0.21  | -0.11 | -0.11 | -0.032 | -0.16 | -0   | -0.16 | 1820 | 1720 | 1490 | 1680 | 1960 | 1570 | 1820 | 1620 | 790.4 | 2368.2 | 3 | 0.019 | 8.028 |

|                                             |                                                                                                                                                                                                                   |                                    |     |      |          |     |       |       |       |        |       |      |       |       |       |       |       |       |       |       |       |       |        |   |        |       |
|---------------------------------------------|-------------------------------------------------------------------------------------------------------------------------------------------------------------------------------------------------------------------|------------------------------------|-----|------|----------|-----|-------|-------|-------|--------|-------|------|-------|-------|-------|-------|-------|-------|-------|-------|-------|-------|--------|---|--------|-------|
| Annexin A2 OS=Ovis aries GN=ANXA2 PE=1 SV=1 | 69 ANXA2_SHEEP,sp P04272 ANXA2_BOVIN,sp P07355 ANXA2_HUMAN,sp P19620 ANXA2_PIG,sp Q07936 ANXA2_RAT,sp Q2Q1M6 ANXA2_CEREL,sp Q5R5A0 ANXA2_PONAB,sp Q6TEQ7 ANXA2_CANFA,tri D2HKX0 D2HKX0_AILME,tri F15073 F15073_PI | rAED<br>GSVI<br>DYEL<br>IDQ<br>DAR | 93% | 48.8 | 53.51808 | Ref | -0.16 | -0.42 | 0.44  | 0.14   | -0.07 | -0.2 | 0.007 | 3320  | 2880  | 2600  | 5300  | 4760  | 3600  | 3420  | 3930  | 790.4 | 2368.2 | 3 | 0.0152 | 6.408 |
| Annexin A2 OS=Ovis aries GN=ANXA2 PE=1 SV=1 | 69 ANXA2_SHEEP,sp P04272 ANXA2_BOVIN,sp P07355 ANXA2_HUMAN,sp P19620 ANXA2_PIG,sp Q07936 ANXA2_RAT,sp Q2Q1M6 ANXA2_CEREL,sp Q5R5A0 ANXA2_PONAB,sp Q6TEQ7 ANXA2_CANFA,tri D2HKX0 D2HKX0_AILME,tri F15073 F15073_PI | sEVD<br>MLk                        | 58% | 31.8 | 51.407   | Ref | 0.15  | -0.1  | -0.03 | -0.043 | -0.15 | 0.24 | -0.4  | 43000 | 41500 | 37900 | 44800 | 48800 | 39600 | 54100 | 34500 | 715.4 | 1428.8 | 2 | 0.0046 | 3.228 |



|                                             |                                                                                                                                                                                        |            |     |      |          |     |        |       |       |        |       |      |       |       |       |       |       |       |       |       |       |       |        |   |        |       |
|---------------------------------------------|----------------------------------------------------------------------------------------------------------------------------------------------------------------------------------------|------------|-----|------|----------|-----|--------|-------|-------|--------|-------|------|-------|-------|-------|-------|-------|-------|-------|-------|-------|-------|--------|---|--------|-------|
| Annexin A2 OS=Ovis aries GN=ANXA2 PE=1 SV=1 | 69 ANXA2_SHEEP,sp P04272 ANXA2_BOVIN,sp P07355 ANXA2_HUMAN,sp P19620 ANXA2_PIG,sp Q07936 ANXA2_RAT,sp Q2Q1M6 ANXA2_CEREL,sp Q5R5A0 ANXA2_PONAB,sp Q6TEQ7 ANXA2_CANFA,tr D2HKX0 D2HKX0_ | tNQELQEINR | 71% | 35.2 | 52.26842 | Ref | -0.014 | -0.04 | -0.08 | -0.058 | -0.06 | 0.31 | -0.39 | 18600 | 16100 | 17200 | 18700 | 20900 | 18200 | 24600 | 15000 | 774.9 | 1547.8 | 2 | 0.0116 | 7.469 |
| Annexin A2 OS=Ovis aries GN=ANXA2 PE=1 SV=1 | 69 ANXA2_SHEEP,sp P04272 ANXA2_BOVIN,sp P07355 ANXA2_HUMAN,sp P19620 ANXA2_PIG,sp Q07936 ANXA2_RAT,sp Q2Q1M6 ANXA2_CEREL,sp Q5R5A0 ANXA2_PONAB,sp Q6TEQ7 ANXA2_CANFA,tr D2HKX0 D2HKX0_ | tPAQYDAS   | 95% | 72.7 | 53.46933 | Ref | 0.11   | -0.11 | -0.1  | 0.14   | -0.08 | 0.23 | -0.6  | 9480  | 8870  | 8240  | 9320  | 12100 | 9060  | 11800 | 6580  | 916   | 1830   | 2 | 0.0057 | 3.123 |

|                                                                                     |                                                                                                                                                                             |                              |            |             |                 |            |             |              |              |              |              |              |              |              |              |              |               |              |              |              |              |              |               |          |               |              |
|-------------------------------------------------------------------------------------|-----------------------------------------------------------------------------------------------------------------------------------------------------------------------------|------------------------------|------------|-------------|-----------------|------------|-------------|--------------|--------------|--------------|--------------|--------------|--------------|--------------|--------------|--------------|---------------|--------------|--------------|--------------|--------------|--------------|---------------|----------|---------------|--------------|
| <p>Polymerase I and transcript release factor OS=Homo sapiens GN=PTRF PE=1 SV=1</p> | <p>sp Q6NZI2 PTRF_HUMAN, tr B3KRY5 B3KRY5_HUMAN, tr E1BNE7 E1BNE7_BOVIN, tr E2RBJ0 E2RBJ0_CANFA, tr F6U9J5 F6U9J5_CALJA, tr F6U9L1 F6U9L1_CALJA, tr F7HJ72 F7HJ72_MACMU</p> | <p>eGQ<br/>VEVL<br/>k</p>    | <p>89%</p> | <p>40.6</p> | <p>50.96827</p> | <p>Ref</p> | <p>0.16</p> | <p>-0.51</p> | <p>0.052</p> | <p>-0.26</p> | <p>-0.05</p> | <p>-0.53</p> | <p>-0.04</p> | <p>12500</p> | <p>12400</p> | <p>8420</p>  | <p>14000</p>  | <p>12400</p> | <p>12500</p> | <p>9340</p>  | <p>13100</p> | <p>755.5</p> | <p>1508.9</p> | <p>2</p> | <p>0.0038</p> | <p>2.495</p> |
| <p>Polymerase I and transcript release factor OS=Homo sapiens GN=PTRF PE=1 SV=1</p> | <p>sp Q6NZI2 PTRF_HUMAN, tr B3KRY5 B3KRY5_HUMAN, tr E1BNE7 E1BNE7_BOVIN, tr E2RBJ0 E2RBJ0_CANFA, tr F6U9J5 F6U9J5_CALJA, tr F6U9L1 F6U9L1_CALJA, tr F7HJ72 F7HJ72_MACMU</p> | <p>kLEV<br/>NEA<br/>ELLR</p> | <p>64%</p> | <p>33.3</p> | <p>51.47788</p> | <p>Ref</p> | <p>0.28</p> | <p>-0.7</p>  | <p>0.28</p>  | <p>-0.36</p> | <p>-0.05</p> | <p>-0.76</p> | <p>-0.11</p> | <p>93500</p> | <p>96700</p> | <p>53500</p> | <p>118000</p> | <p>83300</p> | <p>90300</p> | <p>57900</p> | <p>89800</p> | <p>641.4</p> | <p>1921.1</p> | <p>3</p> | <p>0.0174</p> | <p>9.048</p> |

|                                                                              |                                                                                                                                                                      |              |     |      |          |     |       |       |      |       |       |       |       |       |        |       |        |        |       |       |        |       |        |   |        |       |
|------------------------------------------------------------------------------|----------------------------------------------------------------------------------------------------------------------------------------------------------------------|--------------|-----|------|----------|-----|-------|-------|------|-------|-------|-------|-------|-------|--------|-------|--------|--------|-------|-------|--------|-------|--------|---|--------|-------|
| Polymerase I and transcript release factor OS=Homo sapiens GN=PTRF PE=1 SV=1 | sp Q6NZI2 PTRF_HUMAN, tr B3KRY5 B3KRY5_HUMAN, tr E1BNE7 E1BNE7_BOVIN, tr E2RBJ0 E2RBJ0_CANFA, tr F6U9J5 F6U9J5_CALJA, tr F6U9L1 F6U9L1_CALJA, tr F7HJ72 F7HJ72_MACMU | kSFTPDHVVYAR | 58% | 34.1 | 53.42632 | Ref | 0.033 | -0.39 | 0.11 | -0.34 | -0.03 | -0.44 | 0.13  | 14100 | 14800  | 12000 | 19100  | 15400  | 16700 | 13100 | 19300  | 676.7 | 2027.1 | 3 | 0.0141 | 6.976 |
| Polymerase I and transcript release factor OS=Homo sapiens GN=PTRF PE=1 SV=1 | sp Q6NZI2 PTRF_HUMAN, tr B3KRY5 B3KRY5_HUMAN, tr E1BNE7 E1BNE7_BOVIN, tr E2RBJ0 E2RBJ0_CANFA, tr F6U9J5 F6U9J5_CALJA, tr F6U9L1 F6U9L1_CALJA, tr F7HJ72 F7HJ72_MACMU | kVSVNVk      | 69% | 26.2 | 45.24838 | Ref | 0.091 | -0.81 | 0.34 | -0.25 | 0.09  | -0.91 | -0.03 | 1E+05 | 109000 | 63600 | 159000 | 116000 | 1E+05 | 66700 | 122000 | 422.3 | 1685.1 | 4 | 0.0027 | 1.599 |

|                                                                                     |                                                                                                                                                                             |                                              |            |             |                 |            |             |              |              |              |              |              |              |             |             |             |             |             |             |             |             |              |               |          |               |              |
|-------------------------------------------------------------------------------------|-----------------------------------------------------------------------------------------------------------------------------------------------------------------------------|----------------------------------------------|------------|-------------|-----------------|------------|-------------|--------------|--------------|--------------|--------------|--------------|--------------|-------------|-------------|-------------|-------------|-------------|-------------|-------------|-------------|--------------|---------------|----------|---------------|--------------|
| <p>Polymerase I and transcript release factor OS=Homo sapiens GN=PTRF PE=1 SV=1</p> | <p>sp Q6NZI2 PTRF_HUMAN, tr B3KRY5 B3KRY5_HUMAN, tr E1BNE7 E1BNE7_BOVIN, tr E2RBJ0 E2RBJ0_CANFA, tr F6U9J5 F6U9J5_CALJA, tr F6U9L1 F6U9L1_CALJA, tr F7HJ72 F7HJ72_MACMU</p> | <p>qAE<br/>MEG<br/>AVQ<br/>SIQG<br/>ELSK</p> | <p>95%</p> | <p>57.8</p> | <p>54.79874</p> | <p>Ref</p> | <p>0.11</p> | <p>-0.49</p> | <p>-0.08</p> | <p>-0.27</p> | <p>-0.17</p> | <p>-0.54</p> | <p>0.14</p>  | <p>4820</p> | <p>4200</p> | <p>3000</p> | <p>4490</p> | <p>4340</p> | <p>4050</p> | <p>3290</p> | <p>5220</p> | <p>805.1</p> | <p>2412.3</p> | <p>3</p> | <p>0.0164</p> | <p>6.778</p> |
| <p>Polymerase I and transcript release factor OS=Homo sapiens GN=PTRF PE=1 SV=1</p> | <p>sp Q6NZI2 PTRF_HUMAN, tr B3KRY5 B3KRY5_HUMAN, tr E1BNE7 E1BNE7_BOVIN, tr E2RBJ0 E2RBJ0_CANFA, tr F6U9J5 F6U9J5_CALJA, tr F6U9L1 F6U9L1_CALJA, tr F7HJ72 F7HJ72_MACMU</p> | <p>qAE<br/>MEG<br/>AVQ<br/>SIQG<br/>ELSK</p> | <p>53%</p> | <p>34.7</p> | <p>54.80566</p> | <p>Ref</p> | <p>0.18</p> | <p>-0.3</p>  | <p>-0.05</p> | <p>-0.39</p> | <p>-0.49</p> | <p>-0.39</p> | <p>-0.11</p> | <p>2240</p> | <p>1770</p> | <p>1380</p> | <p>1840</p> | <p>1600</p> | <p>1300</p> | <p>1450</p> | <p>1750</p> | <p>805.1</p> | <p>2412.3</p> | <p>3</p> | <p>0.0138</p> | <p>5.708</p> |

|                                                                                     |                                                                                                                                                                             |                  |            |             |                 |            |              |              |              |              |              |              |              |              |              |              |              |              |              |             |              |              |             |          |               |              |
|-------------------------------------------------------------------------------------|-----------------------------------------------------------------------------------------------------------------------------------------------------------------------------|------------------|------------|-------------|-----------------|------------|--------------|--------------|--------------|--------------|--------------|--------------|--------------|--------------|--------------|--------------|--------------|--------------|--------------|-------------|--------------|--------------|-------------|----------|---------------|--------------|
| <p>Polymerase I and transcript release factor OS=Homo sapiens GN=PTRF PE=1 SV=1</p> | <p>sp Q6NZI2 PTRF_HUMAN, tr B3KRY5 B3KRY5_HUMAN, tr E1BNE7 E1BNE7_BOVIN, tr E2RBJ0 E2RBJ0_CANFA, tr F6U9J5 F6U9J5_CALJA, tr F6U9L1 F6U9L1_CALJA, tr F7HJ72 F7HJ72_MACMU</p> | <p>vMIYQDEVk</p> | <p>90%</p> | <p>43.1</p> | <p>53.03522</p> | <p>Ref</p> | <p>0.31</p>  | <p>-0.59</p> | <p>0.33</p>  | <p>-0.38</p> | <p>-0.15</p> | <p>-0.93</p> | <p>-0.17</p> | <p>17500</p> | <p>17600</p> | <p>10200</p> | <p>21700</p> | <p>14700</p> | <p>15000</p> | <p>9150</p> | <p>15300</p> | <p>867</p>   | <p>1732</p> | <p>2</p> | <p>0.0083</p> | <p>4.778</p> |
| <p>Polymerase I and transcript release factor OS=Homo sapiens GN=PTRF PE=1 SV=1</p> | <p>sp Q6NZI2 PTRF_HUMAN, tr B3KRY5 B3KRY5_HUMAN, tr E1BNE7 E1BNE7_BOVIN, tr E2RBJ0 E2RBJ0_CANFA, tr F6U9J5 F6U9J5_CALJA, tr F6U9L1 F6U9L1_CALJA, tr F7HJ72 F7HJ72_MACMU</p> | <p>vPPFTFHV</p>  | <p>74%</p> | <p>35.4</p> | <p>51.13395</p> | <p>Ref</p> | <p>0.018</p> | <p>-0.6</p>  | <p>0.098</p> | <p>-0.19</p> | <p>0.021</p> | <p>-0.55</p> | <p>0.031</p> | <p>11500</p> | <p>10300</p> | <p>7290</p>  | <p>13300</p> | <p>12000</p> | <p>12100</p> | <p>8530</p> | <p>12700</p> | <p>560.7</p> | <p>1679</p> | <p>3</p> | <p>0.0091</p> | <p>5.442</p> |

|                                                                                     |                                                                                                                                                                             |                  |            |             |                 |            |             |              |             |              |              |              |              |              |              |              |              |              |              |              |              |              |             |          |               |              |
|-------------------------------------------------------------------------------------|-----------------------------------------------------------------------------------------------------------------------------------------------------------------------------|------------------|------------|-------------|-----------------|------------|-------------|--------------|-------------|--------------|--------------|--------------|--------------|--------------|--------------|--------------|--------------|--------------|--------------|--------------|--------------|--------------|-------------|----------|---------------|--------------|
| <p>Polymerase I and transcript release factor OS=Homo sapiens GN=PTRF PE=1 SV=1</p> | <p>sp Q6NZI2 PTRF_HUMAN, tr B3KRY5 B3KRY5_HUMAN, tr E1BNE7 E1BNE7_BOVIN, tr E2RBJ0 E2RBJ0_CANFA, tr F6U9J5 F6U9J5_CALJA, tr F6U9L1 F6U9L1_CALJA, tr F7HJ72 F7HJ72_MACMU</p> | <p>vPPF TFHV</p> | <p>84%</p> | <p>38.9</p> | <p>50.97611</p> | <p>Ref</p> | <p>0.17</p> | <p>-0.78</p> | <p>0.28</p> | <p>-0.42</p> | <p>0.008</p> | <p>-0.93</p> | <p>0.15</p>  | <p>30100</p> | <p>29200</p> | <p>16500</p> | <p>38500</p> | <p>26100</p> | <p>30600</p> | <p>16700</p> | <p>35100</p> | <p>560.7</p> | <p>1679</p> | <p>3</p> | <p>0.0066</p> | <p>3.924</p> |
| <p>Polymerase I and transcript release factor OS=Homo sapiens GN=PTRF PE=1 SV=1</p> | <p>sp Q6NZI2 PTRF_HUMAN, tr B3KRY5 B3KRY5_HUMAN, tr E1BNE7 E1BNE7_BOVIN, tr E2RBJ0 E2RBJ0_CANFA, tr F6U9J5 F6U9J5_CALJA, tr F6U9L1 F6U9L1_CALJA, tr F7HJ72 F7HJ72_MACMU</p> | <p>vPPF TFHV</p> | <p>95%</p> | <p>50.8</p> | <p>51.19991</p> | <p>Ref</p> | <p>0.11</p> | <p>-0.74</p> | <p>0.27</p> | <p>-0.33</p> | <p>-0.09</p> | <p>-0.81</p> | <p>0.084</p> | <p>74700</p> | <p>66000</p> | <p>39700</p> | <p>89400</p> | <p>65300</p> | <p>67100</p> | <p>42500</p> | <p>78600</p> | <p>560.7</p> | <p>1679</p> | <p>3</p> | <p>0.0104</p> | <p>6.21</p>  |

|                                                                                     |                                                                                                                                                                             |                    |            |             |                 |            |             |              |             |              |              |              |              |              |              |              |              |              |              |              |              |              |             |          |               |              |
|-------------------------------------------------------------------------------------|-----------------------------------------------------------------------------------------------------------------------------------------------------------------------------|--------------------|------------|-------------|-----------------|------------|-------------|--------------|-------------|--------------|--------------|--------------|--------------|--------------|--------------|--------------|--------------|--------------|--------------|--------------|--------------|--------------|-------------|----------|---------------|--------------|
| <p>Polymerase I and transcript release factor OS=Homo sapiens GN=PTRF PE=1 SV=1</p> | <p>sp Q6NZI2 PTRF_HUMAN, tr B3KRY5 B3KRY5_HUMAN, tr E1BNE7 E1BNE7_BOVIN, tr E2RBJ0 E2RBJ0_CANFA, tr F6U9J5 F6U9J5_CALJA, tr F6U9L1 F6U9L1_CALJA, tr F7HJ72 F7HJ72_MACMU</p> | <p>vPPF TFHV k</p> | <p>71%</p> | <p>34.5</p> | <p>51.15574</p> | <p>Ref</p> | <p>0.14</p> | <p>-0.66</p> | <p>0.28</p> | <p>-0.37</p> | <p>-0.11</p> | <p>-0.59</p> | <p>0.1</p>   | <p>14400</p> | <p>15000</p> | <p>9340</p>  | <p>20000</p> | <p>14100</p> | <p>14700</p> | <p>11000</p> | <p>17700</p> | <p>560.7</p> | <p>1679</p> | <p>3</p> | <p>0.0049</p> | <p>2.942</p> |
| <p>Polymerase I and transcript release factor OS=Homo sapiens GN=PTRF PE=1 SV=1</p> | <p>sp Q6NZI2 PTRF_HUMAN, tr B3KRY5 B3KRY5_HUMAN, tr E1BNE7 E1BNE7_BOVIN, tr E2RBJ0 E2RBJ0_CANFA, tr F6U9J5 F6U9J5_CALJA, tr F6U9L1 F6U9L1_CALJA, tr F7HJ72 F7HJ72_MACMU</p> | <p>vPPF TFHV k</p> | <p>75%</p> | <p>35.7</p> | <p>51.15574</p> | <p>Ref</p> | <p>0.18</p> | <p>-0.69</p> | <p>0.27</p> | <p>-0.4</p>  | <p>0.032</p> | <p>-0.64</p> | <p>0.039</p> | <p>16100</p> | <p>17400</p> | <p>10400</p> | <p>22600</p> | <p>15700</p> | <p>18500</p> | <p>12100</p> | <p>19200</p> | <p>560.7</p> | <p>1679</p> | <p>3</p> | <p>0.0049</p> | <p>2.942</p> |

|                                                                              |                                                                                                                                                                                                                                                                                                                                                                          |                  |     |      |          |     |      |       |      |        |       |       |       |      |      |      |       |       |       |      |       |       |        |   |        |       |
|------------------------------------------------------------------------------|--------------------------------------------------------------------------------------------------------------------------------------------------------------------------------------------------------------------------------------------------------------------------------------------------------------------------------------------------------------------------|------------------|-----|------|----------|-----|------|-------|------|--------|-------|-------|-------|------|------|------|-------|-------|-------|------|-------|-------|--------|---|--------|-------|
| Polymerase I and transcript release factor OS=Homo sapiens GN=PTRF PE=1 SV=1 | sp Q6NZI2 PTRF_HUMAN, tr B3KRY5 B3KRY5_HUMAN, tr E1BNE7 E1BNE7_BOVIN, tr E2RBJ0 E2RBJ0_CANFA, tr F6U9J5 F6U9J5_CALJA, tr F6U9L1 F6U9L1_CALJA, tr F7HJ72 F7HJ72_MACMU                                                                                                                                                                                                     | vPPF TFHV k      | 51% | 30.1 | 50.76713 | Ref | 0.14 | -0.6  | 0.18 | -0.39  | 0.037 | -0.62 | 0.015 | 2100 | 2080 | 1350 | 2610  | 1930  | 2270  | 1500 | 2310  | 840.5 | 1679   | 2 | 0.0036 | 2.121 |
| 40S ribosomal protein S10 OS=Homo sapiens GN=RPS10 PE=1 SV=1                 | 3 RS10_HUMAN, sp P63325 RS10_MOUSE, sp P63326 RS10_RAT, sp Q3T0F4 RS10_BOVIN, tr A5JST4 A5JST4_CAPHI, tr E2RGQ5 E2RGQ5_CANFA, tr F1LT36 F1LT36_RAT, tr F1RZ28 F1RZ28_PIG, tr F2X213 F2X213_AILME, tr F6SDA2 F6SDA2_MONDO, tr F6TQP3 F6TQP3_HUMAN, tr E1BNE7 E1BNE7_BOVIN, tr E2RBJ0 E2RBJ0_CANFA, tr F6U9J5 F6U9J5_CALJA, tr F6U9L1 F6U9L1_CALJA, tr F7HJ72 F7HJ72_MACMU | aEAGAG SATE FQFR | 95% | 53.5 | 51.76227 | Ref | 0.16 | -0.05 | 0.18 | -0.075 | 0.32  | -0.23 | 0.16  | 9480 | 9420 | 8810 | 11600 | 10700 | 12300 | 8770 | 11400 | 873.4 | 1744.9 | 2 | 0.0112 | 6.413 |



|                                                                       |                                                                                                                                                                                                                                                                                                                                     |                             |     |      |          |     |       |       |       |        |       |       |      |       |       |       |       |       |       |       |       |       |        |   |        |       |
|-----------------------------------------------------------------------|-------------------------------------------------------------------------------------------------------------------------------------------------------------------------------------------------------------------------------------------------------------------------------------------------------------------------------------|-----------------------------|-----|------|----------|-----|-------|-------|-------|--------|-------|-------|------|-------|-------|-------|-------|-------|-------|-------|-------|-------|--------|---|--------|-------|
| 40S ribosomal protein S10<br>OS=Homo sapiens<br>GN=RPS10 PE=1<br>SV=1 | 3 RS10_H<br>UMAN,sp<br> P63325 <br>RS10_MO<br>USE,sp P6<br>3326 RS1<br>0_RAT,sp<br> Q3T0F4 <br>RS10_BO<br>VIN,tr A5<br>JST4 A5JS<br>T4_CAPHI<br>,tr E2RGQ<br>5 E2RGQ<br>5_CANFA,<br>tr F1LT36<br> F1LT36_<br>RAT,tr F1<br>RZ28 F1R<br>Z28_PIG,t<br>r F2X213<br> F2X213_<br>AILME,tr <br>F6SDA2 F<br>6SDA2_M<br>ONDO,tr <br>F6TQP3 F | aEA<br>GAG<br>SATE<br>FQFR  | 80% | 38.1 | 51.84319 | Ref | 0.074 | 0.2   | 0.033 | -0.08  | -0.01 | -0.01 | 0.28 | 13700 | 12900 | 15300 | 15200 | 15500 | 14200 | 14900 | 18100 | 582.6 | 1744.9 | 3 | 0.0093 | 5.334 |
| 40S ribosomal protein S10<br>OS=Homo sapiens<br>GN=RPS10 PE=1<br>SV=1 | 3 RS10_H<br>UMAN,sp<br> P63325 <br>RS10_MO<br>USE,sp P6<br>3326 RS1<br>0_RAT,sp<br> Q3T0F4 <br>RS10_BO<br>VIN,tr A5<br>JST4 A5JS<br>T4_CAPHI<br>,tr E2RGQ<br>5 E2RGQ<br>5_CANFA,<br>tr F1LT36<br> F1LT36_<br>RAT,tr F1<br>RZ28 F1R<br>Z28_PIG,t<br>r F2X213<br> F2X213_<br>AILME,tr <br>F6SDA2 F<br>6SDA2_M<br>ONDO,tr <br>F6TQP3 F | dyLH<br>LPPE<br>IVPA<br>TLR | 71% | 33.6 | 52.05994 | Ref | 0.14  | -0.09 | 0.19  | -0.043 | 0.033 | 0.048 | 0.16 | 927   | 864   | 803   | 1090  | 1020  | 942   | 994   | 1070  | 586.3 | 2341.4 | 4 | 0.0079 | 3.38  |

|                                                                       |                                                                                                                                                                                                                                                                                                                                      |             |     |      |          |     |       |       |      |        |      |       |      |       |        |       |        |        |       |       |        |       |        |   |       |       |
|-----------------------------------------------------------------------|--------------------------------------------------------------------------------------------------------------------------------------------------------------------------------------------------------------------------------------------------------------------------------------------------------------------------------------|-------------|-----|------|----------|-----|-------|-------|------|--------|------|-------|------|-------|--------|-------|--------|--------|-------|-------|--------|-------|--------|---|-------|-------|
| 40S ribosomal protein S10<br>OS=Homo sapiens<br>GN=RPS10 PE=1<br>SV=1 | 3 RS10_H<br>UMAN,sp<br> P63325 <br>RS10_MO<br>USE,sp P6<br>3326 RS1<br>0_RAT,sp<br> Q3T0F4 <br>RS10_BO<br>VIN,tr A5<br>JST4 A5JS<br>T4_CAPHI<br>,tr E2RGQ<br>5 E2RGQ<br>5_CANFA,<br>tr F1LT36<br> F1LT36_<br>RAT,tr F1<br>RZ28 F1R<br>Z28_PIG,t<br>r F2X213<br> F2X213_<br>AILME,tr <br>F6SDA2 F<br>6SDA2_M<br>ONDO,tr F<br>F6TQP3 F | hPEL<br>ADk | 57% | 32.1 | 51.88673 | Ref | 0.093 | -0.09 | 0.28 | -0.092 | 0.25 | -0.17 | 0.19 | 8760  | 8310   | 7960  | 11500  | 9810   | 10900 | 8480  | 10800  | 709.4 | 1416.8 | 2 | 0.028 | 19.78 |
| 40S ribosomal protein S10<br>OS=Homo sapiens<br>GN=RPS10 PE=1<br>SV=1 | 3 RS10_H<br>UMAN,sp<br> P63325 <br>RS10_MO<br>USE,sp P6<br>3326 RS1<br>0_RAT,sp<br> Q3T0F4 <br>RS10_BO<br>VIN,tr A5<br>JST4 A5JS<br>T4_CAPHI<br>,tr E2RGQ<br>5 E2RGQ<br>5_CANFA,<br>tr F1LT36<br> F1LT36_<br>RAT,tr F1<br>RZ28 F1R<br>Z28_PIG,t<br>r F2X213<br> F2X213_<br>AILME,tr <br>F6SDA2 F<br>6SDA2_M<br>ONDO,tr F<br>F6TQP3 F | hPEL<br>ADk | 67% | 34   | 51.61071 | Ref | 0.073 | -0.23 | 0.28 | 0.021  | 0.27 | -0.11 | 0.17 | 1E+05 | 111000 | 97100 | 156000 | 143000 | 1E+05 | 1E+05 | 144000 | 473.3 | 1416.8 | 3 | 0.016 | 11.3  |

|                                                                       |                                                                                                                                                                                                                                                                                                                                      |               |     |      |          |     |        |       |      |        |       |       |       |      |     |     |      |      |      |     |      |       |        |   |        |       |
|-----------------------------------------------------------------------|--------------------------------------------------------------------------------------------------------------------------------------------------------------------------------------------------------------------------------------------------------------------------------------------------------------------------------------|---------------|-----|------|----------|-----|--------|-------|------|--------|-------|-------|-------|------|-----|-----|------|------|------|-----|------|-------|--------|---|--------|-------|
| 40S ribosomal protein S10<br>OS=Homo sapiens<br>GN=RPS10 PE=1<br>SV=1 | 3 RS10_H<br>UMAN,sp<br> P63325 <br>RS10_MO<br>USE,sp P6<br>3326 RS1<br>0_RAT,sp<br> Q3T0F4 <br>RS10_BO<br>VIN,tr A5<br>JST4 A5JS<br>T4_CAPHI<br>,tr E2RGQ<br>5 E2RGQ<br>5_CANFA,<br>tr F1LT36<br> F1LT36_<br>RAT,tr F1<br>RZ28 F1R<br>Z28_PIG,t<br>r F2X213<br> F2X213_<br>AILME,tr <br>F6SDA2 F<br>6SDA2_M<br>ONDO,tr F<br>F6TQP3 F | iAIYE<br>LLFk | 60% | 30.1 | 49.08233 | Ref | 0.093  | 0.034 | 0.13 | -0.073 | -0.06 | -0.07 | -0.18 | 925  | 604 | 629 | 752  | 722  | 637  | 662 | 608  | 573.4 | 1717   | 3 | 0.016  | 9.298 |
| 40S ribosomal protein S10<br>OS=Homo sapiens<br>GN=RPS10 PE=1<br>SV=1 | 3 RS10_H<br>UMAN,sp<br> P63325 <br>RS10_MO<br>USE,sp P6<br>3326 RS1<br>0_RAT,sp<br> Q3T0F4 <br>RS10_BO<br>VIN,tr A5<br>JST4 A5JS<br>T4_CAPHI<br>,tr E2RGQ<br>5 E2RGQ<br>5_CANFA,<br>tr F1LT36<br> F1LT36_<br>RAT,tr F1<br>RZ28 F1R<br>Z28_PIG,t<br>r F2X213<br> F2X213_<br>AILME,tr <br>F6SDA2 F<br>6SDA2_M<br>ONDO,tr F<br>F6TQP3 F | iAIYE<br>LLFk | 95% | 43.6 | 48.64244 | Ref | -0.001 | -0.19 | 0.36 | -0.094 | 0.23  | -0.23 | 0.23  | 1120 | 911 | 865 | 1420 | 1150 | 1260 | 949 | 1300 | 859.5 | 1717.1 | 2 | 0.0111 | 6.454 |

|                                                                       |                                                                                                                                                                                                                                                                                                                                      |               |     |      |          |     |       |       |      |       |      |       |      |     |     |     |     |     |     |     |     |       |        |   |        |       |
|-----------------------------------------------------------------------|--------------------------------------------------------------------------------------------------------------------------------------------------------------------------------------------------------------------------------------------------------------------------------------------------------------------------------------|---------------|-----|------|----------|-----|-------|-------|------|-------|------|-------|------|-----|-----|-----|-----|-----|-----|-----|-----|-------|--------|---|--------|-------|
| 40S ribosomal protein S10<br>OS=Homo sapiens<br>GN=RPS10 PE=1<br>SV=1 | 3 RS10_H<br>UMAN,sp<br> P63325 <br>RS10_MO<br>USE,sp P6<br>3326 RS1<br>0_RAT,sp<br> Q3T0F4 <br>RS10_BO<br>VIN,tr A5<br>JST4 A5JS<br>T4_CAPHI<br>,tr E2RGQ<br>5 E2RGQ<br>5_CANFA,<br>tr F1LT36<br> F1LT36_<br>RAT,tr F1<br>RZ28 F1R<br>Z28_PIG,t<br>r F2X213<br> F2X213_<br>AILME,tr <br>F6SDA2 F<br>6SDA2_M<br>ONDO,tr F<br>F6TQP3 F | iAIYE<br>LLFk | 89% | 38.3 | 48.81042 | Ref | -0.03 | -0.24 | 0.27 | 0.12  | 0.21 | -0.11 | 0.13 | 434 | 350 | 329 | 525 | 521 | 486 | 407 | 474 | 859.5 | 1717.1 | 2 | 0.0116 | 6.734 |
| 40S ribosomal protein S10<br>OS=Homo sapiens<br>GN=RPS10 PE=1<br>SV=1 | 3 RS10_H<br>UMAN,sp<br> P63325 <br>RS10_MO<br>USE,sp P6<br>3326 RS1<br>0_RAT,sp<br> Q3T0F4 <br>RS10_BO<br>VIN,tr A5<br>JST4 A5JS<br>T4_CAPHI<br>,tr E2RGQ<br>5 E2RGQ<br>5_CANFA,<br>tr F1LT36<br> F1LT36_<br>RAT,tr F1<br>RZ28 F1R<br>Z28_PIG,t<br>r F2X213<br> F2X213_<br>AILME,tr <br>F6SDA2 F<br>6SDA2_M<br>ONDO,tr F<br>F6TQP3 F | iAIYE<br>LLFk | 55% | 28.8 | 48.93546 | Ref | 0.045 | -0.02 | 0.32 | 0.026 | 0.25 | -0.43 | 0.22 | 498 | 458 | 475 | 672 | 606 | 620 | 403 | 627 | 859.5 | 1717   | 2 | 0.0152 | 8.864 |

|                                                                       |                                                                                                                                                                                                                                                                                                                                      |               |     |      |          |     |       |       |      |       |      |       |      |      |     |     |      |      |      |      |      |       |        |   |        |       |
|-----------------------------------------------------------------------|--------------------------------------------------------------------------------------------------------------------------------------------------------------------------------------------------------------------------------------------------------------------------------------------------------------------------------------|---------------|-----|------|----------|-----|-------|-------|------|-------|------|-------|------|------|-----|-----|------|------|------|------|------|-------|--------|---|--------|-------|
| 40S ribosomal protein S10<br>OS=Homo sapiens<br>GN=RPS10 PE=1<br>SV=1 | 3 RS10_H<br>UMAN,sp<br> P63325 <br>RS10_MO<br>USE,sp P6<br>3326 RS1<br>0_RAT,sp<br> Q3T0F4 <br>RS10_BO<br>VIN,tr A5<br>JST4 A5JS<br>T4_CAPHI<br>,tr E2RGQ<br>5 E2RGQ<br>5_CANFA,<br>tr F1LT36<br> F1LT36_<br>RAT,tr F1<br>RZ28 F1R<br>Z28_PIG,t<br>r F2X213<br> F2X213_<br>AILME,tr <br>F6SDA2 F<br>6SDA2_M<br>ONDO,tr F<br>F6TQP3 F | iAIYE<br>LLFk | 69% | 31.4 | 48.51026 | Ref | -0.12 | -0.2  | 0.2  | 0.058 | 0.32 | -0.01 | 0.17 | 1220 | 967 | 993 | 1470 | 1470 | 1530 | 1270 | 1430 | 573.4 | 1717.1 | 3 | 0.0074 | 4.287 |
| 40S ribosomal protein S10<br>OS=Homo sapiens<br>GN=RPS10 PE=1<br>SV=1 | 3 RS10_H<br>UMAN,sp<br> P63325 <br>RS10_MO<br>USE,sp P6<br>3326 RS1<br>0_RAT,sp<br> Q3T0F4 <br>RS10_BO<br>VIN,tr A5<br>JST4 A5JS<br>T4_CAPHI<br>,tr E2RGQ<br>5 E2RGQ<br>5_CANFA,<br>tr F1LT36<br> F1LT36_<br>RAT,tr F1<br>RZ28 F1R<br>Z28_PIG,t<br>r F2X213<br> F2X213_<br>AILME,tr <br>F6SDA2 F<br>6SDA2_M<br>ONDO,tr F<br>F6TQP3 F | iAIYE<br>LLFk | 66% | 30.3 | 47.96935 | Ref | 0.48  | -0.57 | 0.19 | 0.006 | 0.01 | -0.75 | 0.54 | 205  | 226 | 119 | 226  | 219  | 192  | 118  | 286  | 573.4 | 1717.1 | 3 | 0.0013 | 0.777 |

|                                                                       |                                                                                                                                                                                                                                                                                                                                     |                             |     |      |          |     |       |       |      |        |      |       |      |       |       |       |       |       |       |       |       |       |        |   |        |       |
|-----------------------------------------------------------------------|-------------------------------------------------------------------------------------------------------------------------------------------------------------------------------------------------------------------------------------------------------------------------------------------------------------------------------------|-----------------------------|-----|------|----------|-----|-------|-------|------|--------|------|-------|------|-------|-------|-------|-------|-------|-------|-------|-------|-------|--------|---|--------|-------|
| 40S ribosomal protein S10<br>OS=Homo sapiens<br>GN=RPS10 PE=1<br>SV=1 | 3 RS10_H<br>UMAN,sp<br> P63325 <br>RS10_MO<br>USE,sp P6<br>3326 RS1<br>0_RAT,sp<br> Q3T0F4 <br>RS10_BO<br>VIN,tr A5<br>JST4 A5JS<br>T4_CAPHI<br>,tr E2RGQ<br>5 E2RGQ<br>5_CANFA,<br>tr F1LT36<br> F1LT36_<br>RAT,tr F1<br>RZ28 F1R<br>Z28_PIG,t<br>r F2X213<br> F2X213_<br>AILME,tr <br>F6SDA2 F<br>6SDA2_M<br>ONDO,tr <br>F6TQP3 F | kAEA<br>GAG<br>SATE<br>FQFR | 76% | 39.5 | 54.50808 | Ref | -0.11 | 0.008 | 0.32 | -0.086 | 0.35 | -0.27 | 0.25 | 26100 | 22500 | 26400 | 36800 | 30600 | 36200 | 24600 | 34900 | 726.7 | 2177.1 | 3 | 0.0216 | 9.919 |
| 40S ribosomal protein S10<br>OS=Homo sapiens<br>GN=RPS10 PE=1<br>SV=1 | 3 RS10_H<br>UMAN,sp<br> P63325 <br>RS10_MO<br>USE,sp P6<br>3326 RS1<br>0_RAT,sp<br> Q3T0F4 <br>RS10_BO<br>VIN,tr A5<br>JST4 A5JS<br>T4_CAPHI<br>,tr E2RGQ<br>5 E2RGQ<br>5_CANFA,<br>tr F1LT36<br> F1LT36_<br>RAT,tr F1<br>RZ28 F1R<br>Z28_PIG,t<br>r F2X213<br> F2X213_<br>AILME,tr <br>F6SDA2 F<br>6SDA2_M<br>ONDO,tr <br>F6TQP3 F | nVP<br>NLH<br>VMK           | 79% | 36.9 | 51.89619 | Ref | 0.064 | -0.2  | 0.32 | -0.097 | 0.32 | -0.12 | 0.12 | 9830  | 8930  | 8060  | 13000 | 10700 | 12500 | 9600  | 11300 | 830.5 | 1659   | 2 | 0.0096 | 5.796 |

|                                                                                      |                                                                                                                                                                                                                                        |               |     |      |          |     |       |      |       |       |       |       |       |       |       |       |       |       |       |       |       |       |        |   |        |       |
|--------------------------------------------------------------------------------------|----------------------------------------------------------------------------------------------------------------------------------------------------------------------------------------------------------------------------------------|---------------|-----|------|----------|-----|-------|------|-------|-------|-------|-------|-------|-------|-------|-------|-------|-------|-------|-------|-------|-------|--------|---|--------|-------|
| Translocon-associated protein subunit alpha<br>OS=Bos taurus<br>GN=SSR1 PE=2<br>SV=1 | 7 SSRA_BOVIN,sp P16967 SRA_CANFA,sp P43307 SSRA_HUMAN,sp Q5R4X4 SSRA_PONAB,sp Q9CY50 SRA_MOUSE,trans B2R6N9 B2R6N9_HUMAN,trans D3ZI03 D3ZI03_RAT,trans E2QRZ8 E2QRZ8_CANFA,trans E9PAL7 E9PAL7_HUMAN,trans E9Q9A7 E9Q9A7_MOUSE,trans F | flVG          | 79% | 35.8 | 50.73898 | Ref | -0.14 | 0.16 | -0.25 | -0.2  | -0.03 | -0.09 | -0.01 | 1720  | 1510  | 2020  | 1710  | 1960  | 1910  | 1920  | 2010  | 767.5 | 1532.9 | 2 | 0.0058 | 3.798 |
| Translocon-associated protein subunit alpha<br>OS=Bos taurus<br>GN=SSR1 PE=2<br>SV=1 | 7 SSRA_BOVIN,sp P16967 SRA_CANFA,sp P43307 SSRA_HUMAN,sp Q5R4X4 SSRA_PONAB,sp Q9CY50 SRA_MOUSE,trans B2R6N9 B2R6N9_HUMAN,trans D3ZI03 D3ZI03_RAT,trans E2QRZ8 E2QRZ8_CANFA,trans E9PAL7 E9PAL7_HUMAN,trans E9Q9A7 E9Q9A7_MOUSE,trans F | gEDF PAN NIVK | 95% | 57.5 | 53.84551 | Ref | -0.26 | 0.28 | -0.22 | -0.42 | 0.09  | -0.15 | -0.2  | 28000 | 19300 | 30400 | 24100 | 23200 | 28800 | 25400 | 24500 | 906.5 | 1811   | 2 | 0.0161 | 8.88  |

|                                                                                      |                                                                                                                                                                                                                                        |               |     |      |          |     |       |      |       |       |       |       |       |       |       |       |       |       |       |       |       |       |      |   |        |       |
|--------------------------------------------------------------------------------------|----------------------------------------------------------------------------------------------------------------------------------------------------------------------------------------------------------------------------------------|---------------|-----|------|----------|-----|-------|------|-------|-------|-------|-------|-------|-------|-------|-------|-------|-------|-------|-------|-------|-------|------|---|--------|-------|
| Translocon-associated protein subunit alpha<br>OS=Bos taurus<br>GN=SSR1 PE=2<br>SV=1 | 7 SSRA_BOVIN,sp P16967 SRA_CANFA,sp P43307 SSRA_HUMAN,sp Q5R4X4 SSRA_PONAB,sp Q9CY50 SRA_MOUSE,trans B2R6N9 B2R6N9_HUMAN,trans D3ZI03 D3ZI03_RAT,trans E2QRZ8 E2QRZ8_CANFA,trans E9PAL7 E9PAL7_HUMAN,trans E9Q9A7 E9Q9A7_MOUSE,trans F | gEDF PAN NIVK | 68% | 36.5 | 53.8454  | Ref | -0.13 | 0.15 | -0.29 | -0.36 | -0.09 | 0.12  | -0.15 | 59900 | 47500 | 62700 | 51700 | 54600 | 57200 | 69300 | 57000 | 604.7 | 1811 | 3 | 0.016  | 8.856 |
| Translocon-associated protein subunit alpha<br>OS=Bos taurus<br>GN=SSR1 PE=2<br>SV=1 | 7 SSRA_BOVIN,sp P16967 SRA_CANFA,sp P43307 SSRA_HUMAN,sp Q5R4X4 SSRA_PONAB,sp Q9CY50 SRA_MOUSE,trans B2R6N9 B2R6N9_HUMAN,trans D3ZI03 D3ZI03_RAT,trans E2QRZ8 E2QRZ8_CANFA,trans E9PAL7 E9PAL7_HUMAN,trans E9Q9A7 E9Q9A7_MOUSE,trans F | gEDF PAN NIVK | 95% | 72.7 | 53.89375 | Ref | -0.29 | 0.17 | -0.16 | -0.28 | 0.092 | -0.15 | -0.26 | 10500 | 6940  | 10300 | 9210  | 9380  | 10600 | 9330  | 8610  | 907   | 1812 | 2 | 0.0145 | 7.997 |



|                                                                                      |                                                                                                                                                                                                                            |                      |     |     |      |          |     |       |       |       |        |       |       |       |       |      |       |       |       |       |       |       |       |      |   |        |       |
|--------------------------------------------------------------------------------------|----------------------------------------------------------------------------------------------------------------------------------------------------------------------------------------------------------------------------|----------------------|-----|-----|------|----------|-----|-------|-------|-------|--------|-------|-------|-------|-------|------|-------|-------|-------|-------|-------|-------|-------|------|---|--------|-------|
| Translocon-associated protein subunit alpha<br>OS=Bos taurus<br>GN=SSR1 PE=2<br>SV=1 | 7 SSRA_BOVIN,sp P16967 SRA_CANFA,sp P43307 SSRA_HUMAN,sp Q5R4X4 SSRA_PONAB,sp Q9CY50 SRA_MOUSE,tr B2R6N9 B2R6N9_HUMAN,tr D3ZI03 D3ZI03_RAT, tr E2QRZ8 E2QRZ8_CANFA, tr E9PAL7 E9PAL7_HUMAN, tr E9Q9A7 E9Q9A7_MOUSE, tr F   | gTED<br>FIVE<br>SLDA | SFR | 95% | 64.9 | 52.65453 | Ref | -0.29 | 0.15  | -0.15 | -0.25  | 0.056 | -0.16 | -0.11 | 14000 | 9860 | 14400 | 13200 | 13600 | 14600 | 13100 | 13500 | 995.5 | 1989 | 2 | 0.0129 | 6.493 |
|                                                                                      | 7 SSRA_BOVIN,sp P16967 SRA_CANFA,sp P43307 SSRA_HUMAN,sp Q5R4X4 SSRA_PONAB,sp Q9CY50 SRA_MOUSE, tr B2R6N9 B2R6N9_HUMAN, tr D3ZI03 D3ZI03_RAT, tr E2QRZ8 E2QRZ8_CANFA, tr E9PAL7 E9PAL7_HUMAN, tr E9Q9A7 E9Q9A7_MOUSE, tr F | gTED<br>FIVE<br>SLDA | SFR | 69% | 35.7 | 52.74963 | Ref | 0.12  | -0.07 | -0.13 | -0.088 | -0.02 | 0.025 | -0.34 | 2020  | 2230 | 2120  | 2270  | 2590  | 2380  | 2550  | 1970  | 664   | 1989 | 3 | 0.0086 | 4.326 |

|                                                                                      |                                                                                                                                                                                                                                        |                      |     |     |      |          |     |        |      |      |       |       |       |       |      |      |      |      |      |      |      |      |       |      |   |        |       |
|--------------------------------------------------------------------------------------|----------------------------------------------------------------------------------------------------------------------------------------------------------------------------------------------------------------------------------------|----------------------|-----|-----|------|----------|-----|--------|------|------|-------|-------|-------|-------|------|------|------|------|------|------|------|------|-------|------|---|--------|-------|
| Translocon-associated protein subunit alpha<br>OS=Bos taurus<br>GN=SSR1 PE=2<br>SV=1 | 7 SSRA_BOVIN,sp P16967 SRA_CANFA,sp P43307 SSRA_HUMAN,sp Q5R4X4 SSRA_PONAB,sp Q9CY50 SRA_MOUSE,trans B2R6N9 B2R6N9_HUMAN,trans D3ZI03 D3ZI03_RAT,trans E2QRZ8 E2QRZ8_CANFA,trans E9PAL7 E9PAL7_HUMAN,trans E9Q9A7 E9Q9A7_MOUSE,trans F | gTED<br>FIVE<br>SLDA | SFR | 80% | 38.1 | 52.60518 | Ref | -0.076 | 0.18 | -0.2 | -0.21 | 0.068 | -0.34 | 0.035 | 843  | 805  | 1050 | 898  | 987  | 1040 | 820  | 1060 | 995.5 | 1989 | 2 | 0.0138 | 6.916 |
| Translocon-associated protein subunit alpha<br>OS=Bos taurus<br>GN=SSR1 PE=2<br>SV=1 | 7 SSRA_BOVIN,sp P16967 SRA_CANFA,sp P43307 SSRA_HUMAN,sp Q5R4X4 SSRA_PONAB,sp Q9CY50 SRA_MOUSE,trans B2R6N9 B2R6N9_HUMAN,trans D3ZI03 D3ZI03_RAT,trans E2QRZ8 E2QRZ8_CANFA,trans E9PAL7 E9PAL7_HUMAN,trans E9Q9A7 E9Q9A7_MOUSE,trans F | gTED<br>FIVE<br>SLDA | SFR | 95% | 52.1 | 52.60518 | Ref | -0.12  | 0.12 | -0   | -0.31 | -0.02 | -0.27 | -0.09 | 1420 | 1160 | 1490 | 1530 | 1360 | 1460 | 1280 | 1440 | 995.5 | 1989 | 2 | 0.0138 | 6.916 |

|                                                                             |                                                                                                                                                                                                                            |                |     |      |          |     |        |      |       |       |       |       |                            |     |     |     |     |     |     |     |                            |     |      |   |        |       |
|-----------------------------------------------------------------------------|----------------------------------------------------------------------------------------------------------------------------------------------------------------------------------------------------------------------------|----------------|-----|------|----------|-----|--------|------|-------|-------|-------|-------|----------------------------|-----|-----|-----|-----|-----|-----|-----|----------------------------|-----|------|---|--------|-------|
| Translocon-associated protein subunit alpha OS=Bos taurus GN=SSR1 PE=2 SV=1 | 7 SSRA_BOVIN,sp P16967 SRA_CANFA,sp P43307 SSRA_HUMAN,sp Q5R4X4 SSRA_PONAB,sp Q9CY50 SRA_MOUSE,tr B2R6N9 B2R6N9_HUMAN,tr D3ZI03 D3ZI03_RAT, tr E2QRZ8 E2QRZ8_CANFA, tr E9PAL7 E9PAL7_HUMAN, tr E9Q9A7 E9Q9A7_MOUSE, tr F   | gTED FIVE SLDA | 95% | 52.3 | 52.70161 | Ref | -0.063 | 0.08 | -0.37 | -0.32 | -0.2  | -0.47 | 0.16                       | 693 | 459 | 550 | 451 | 514 | 488 | 423 | 650                        | 664 | 1989 | 3 | 0.0119 | 5.969 |
| Translocon-associated protein subunit alpha OS=Bos taurus GN=SSR1 PE=2 SV=1 | 7 SSRA_BOVIN,sp P16967 SRA_CANFA,sp P43307 SSRA_HUMAN,sp Q5R4X4 SSRA_PONAB,sp Q9CY50 SRA_MOUSE, tr B2R6N9 B2R6N9_HUMAN, tr D3ZI03 D3ZI03_RAT, tr E2QRZ8 E2QRZ8_CANFA, tr E9PAL7 E9PAL7_HUMAN, tr E9Q9A7 E9Q9A7_MOUSE, tr F | gTED FIVE SLDA | 51% | 32.2 | 52.67228 | Ref | 0.096  | 0.15 | -0.63 | 0.043 | -0.18 | 0.02  | Value Missing (-1.9462475) | 370 | 224 | 253 | 166 | 290 | 218 | 261 | Value Missing (-1.9462475) | 664 | 1989 | 3 | 0.0123 | 6.165 |

|                                                                                      |                                                                                                                                                                                                                                        |                             |     |      |          |     |       |       |       |        |       |       |       |     |     |     |     |     |     |     |     |     |      |   |        |       |
|--------------------------------------------------------------------------------------|----------------------------------------------------------------------------------------------------------------------------------------------------------------------------------------------------------------------------------------|-----------------------------|-----|------|----------|-----|-------|-------|-------|--------|-------|-------|-------|-----|-----|-----|-----|-----|-----|-----|-----|-----|------|---|--------|-------|
| Translocon-associated protein subunit alpha<br>OS=Bos taurus<br>GN=SSR1 PE=2<br>SV=1 | 7 SSRA_BOVIN,sp P16967 SRA_CANFA,sp P43307 SSRA_HUMAN,sp Q5R4X4 SSRA_PONAB,sp Q9CY50 SRA_MOUSE,trans B2R6N9 B2R6N9_HUMAN,trans D3ZI03 D3ZI03_RAT,trans E2QRZ8 E2QRZ8_CANFA,trans E9PAL7 E9PAL7_HUMAN,trans E9Q9A7 E9Q9A7_MOUSE,trans F | gTED<br>FIVE<br>SLDA<br>SFR | 95% | 63   | 52.766   | Ref | -0.31 | 0.005 | -0.21 | -0.15  | -0.15 | -0.28 | 0.38  | 600 | 446 | 603 | 584 | 671 | 586 | 559 | 875 | 664 | 1989 | 3 | 0.0088 | 4.416 |
| Translocon-associated protein subunit alpha<br>OS=Bos taurus<br>GN=SSR1 PE=2<br>SV=1 | 7 SSRA_BOVIN,sp P16967 SRA_CANFA,sp P43307 SSRA_HUMAN,sp Q5R4X4 SSRA_PONAB,sp Q9CY50 SRA_MOUSE,trans B2R6N9 B2R6N9_HUMAN,trans D3ZI03 D3ZI03_RAT,trans E2QRZ8 E2QRZ8_CANFA,trans E9PAL7 E9PAL7_HUMAN,trans E9Q9A7 E9Q9A7_MOUSE,trans F | gTED<br>FIVE<br>SLDA<br>SFR | 83% | 40.5 | 52.73793 | Ref | 0.19  | 0.11  | -0.26 | -0.054 | -0.23 | -0    | -0.53 | 174 | 174 | 180 | 155 | 198 | 153 | 187 | 129 | 664 | 1989 | 3 | 0.009  | 4.506 |

|                                                                                                |                                                                                                                                                                                                                                 |                     |            |             |                 |            |               |              |              |              |              |              |              |              |              |              |              |              |              |              |              |              |               |          |               |              |
|------------------------------------------------------------------------------------------------|---------------------------------------------------------------------------------------------------------------------------------------------------------------------------------------------------------------------------------|---------------------|------------|-------------|-----------------|------------|---------------|--------------|--------------|--------------|--------------|--------------|--------------|--------------|--------------|--------------|--------------|--------------|--------------|--------------|--------------|--------------|---------------|----------|---------------|--------------|
| <p>Translocon-associated protein subunit alpha<br/>OS=Bos taurus<br/>GN=SSR1 PE=2<br/>SV=1</p> | <p>7 SSRA_BOVIN,sp P16967 SRA_CANFA,sp P43307 SSRA_HUMAN,sp Q5R4X4 SSRA_PONAB,sp Q9CY50 SRA_MOUSE,tr B2R6N9 B2R6N9_HUMAN,tr D3ZI03 D3ZI03_RAT, tr E2QRZ8 E2QRZ8_CANFA, tr E9PAL7 E9PAL7_HUMAN, tr E9Q9A7 E9Q9A7_MOUSE, tr F</p> | <p>sVGS<br/>DE</p>  | <p>92%</p> | <p>36.5</p> | <p>45.00621</p> | <p>Ref</p> | <p>-0.077</p> | <p>0.039</p> | <p>-0.12</p> | <p>-0.26</p> | <p>-0.06</p> | <p>-0.16</p> | <p>-0.1</p>  | <p>556</p>   | <p>444</p>   | <p>522</p>   | <p>523</p>   | <p>524</p>   | <p>525</p>   | <p>514</p>   | <p>529</p>   | <p>449.2</p> | <p>896.42</p> | <p>2</p> | <p>0.0146</p> | <p>16.22</p> |
| <p>Nucleophosmin<br/>OS=Bos taurus<br/>GN=NPM1 PE=2<br/>SV=1</p>                               | <p>sp Q3T160 NPM_BOVIN, tr D2HKP0 D2HKP0_ALME, tr D3U796 D3U796_BOVIN, tr E2R4V7 E2R4V7_CANFA, tr E2RTB1 E2RTB1_CANFA, tr E3SAZ8 E3SAZ8_BOVIN, tr F6X9D3 F6X9D3_HORSE</p>                                                       | <p>mQA<br/>SIEK</p> | <p>64%</p> | <p>33.6</p> | <p>52.06985</p> | <p>Ref</p> | <p>-0.24</p>  | <p>0.085</p> | <p>-0.4</p>  | <p>-0.21</p> | <p>-0.11</p> | <p>-0.13</p> | <p>0.015</p> | <p>23400</p> | <p>17200</p> | <p>23400</p> | <p>18700</p> | <p>23600</p> | <p>22100</p> | <p>22800</p> | <p>24900</p> | <p>707.9</p> | <p>1413.8</p> | <p>2</p> | <p>0.0248</p> | <p>17.5</p>  |

|                                                        |                                                                                                                                                                     |                   |     |      |          |     |       |       |       |       |       |       |       |       |       |       |       |       |       |       |       |       |        |   |        |       |
|--------------------------------------------------------|---------------------------------------------------------------------------------------------------------------------------------------------------------------------|-------------------|-----|------|----------|-----|-------|-------|-------|-------|-------|-------|-------|-------|-------|-------|-------|-------|-------|-------|-------|-------|--------|---|--------|-------|
| Nucleophosmin<br>OS=Bos taurus<br>GN=NPM1 PE=2<br>SV=1 | sp Q3T160 NPM_BOVIN, tr D2HKP0 D2HKP0_AILME, tr D3U796 D3U796_BOVIN, tr E2R4V7 E2R4V7_CANFA, tr E2RTB1 E2RTB1_CANFA, tr E3SAZ8 E3SAZ8_BOVIN, tr F6X9D3 F6X9D3_HORSE | rSAP<br>GSG<br>Sk | 50% | 31.5 | 52.10626 | Ref | -0.15 | 0.044 | -0.43 | -0.17 | -0.11 | 0.033 | -0.04 | 17000 | 15000 | 18600 | 15000 | 19900 | 18100 | 20800 | 19600 | 485.6 | 1453.8 | 3 | 0.0079 | 5.438 |
| Nucleophosmin<br>OS=Bos taurus<br>GN=NPM1 PE=2<br>SV=1 | sp Q3T160 NPM_BOVIN, tr D2HKP0 D2HKP0_AILME, tr D3U796 D3U796_BOVIN, tr E2R4V7 E2R4V7_CANFA, tr E2RTB1 E2RTB1_CANFA, tr E3SAZ8 E3SAZ8_BOVIN, tr F6X9D3 F6X9D3_HORSE | sAPG<br>SGSk      | 58% | 32.4 | 51.77023 | Ref | -0.16 | -0.08 | -0.13 | -0.16 | 0.082 | -0.49 | 0.011 | 18100 | 14700 | 16900 | 18200 | 19800 | 20400 | 14300 | 20100 | 433.6 | 1297.7 | 3 | 0.022  | 16.95 |

|                                                                  |                                                                                                                                                                             |                            |            |             |                 |            |               |              |              |              |              |              |              |              |              |              |              |              |              |              |              |              |               |          |               |              |
|------------------------------------------------------------------|-----------------------------------------------------------------------------------------------------------------------------------------------------------------------------|----------------------------|------------|-------------|-----------------|------------|---------------|--------------|--------------|--------------|--------------|--------------|--------------|--------------|--------------|--------------|--------------|--------------|--------------|--------------|--------------|--------------|---------------|----------|---------------|--------------|
| <p>Nucleophosmin<br/>OS=Bos taurus<br/>GN=NPM1 PE=2<br/>SV=1</p> | <p>sp Q3T160 NPM_BOVIN, tr D2HKP0 D2HKP0_AI LME, tr D3U796 D3U796_BOVIN, tr E2R4V7 E2R4V7_CANFA, tr E2RTB1 E2RTB1_CANFA, tr E3SAZ8 E3SAZ8_BOVIN, tr F6X9D3 F6X9D3_HORSE</p> | <p>tVSL<br/>GAG<br/>Ak</p> | <p>53%</p> | <p>30.4</p> | <p>50.50716</p> | <p>Ref</p> | <p>-0.042</p> | <p>-0.18</p> | <p>-0.05</p> | <p>-0.26</p> | <p>-0.21</p> | <p>-0.08</p> | <p>-0.15</p> | <p>19400</p> | <p>16300</p> | <p>16100</p> | <p>19800</p> | <p>18900</p> | <p>17100</p> | <p>19500</p> | <p>18400</p> | <p>471.3</p> | <p>1410.9</p> | <p>3</p> | <p>0.0021</p> | <p>1.474</p> |
| <p>Nucleophosmin<br/>OS=Bos taurus<br/>GN=NPM1 PE=2<br/>SV=1</p> | <p>sp Q3T160 NPM_BOVIN, tr D2HKP0 D2HKP0_AI LME, tr D3U796 D3U796_BOVIN, tr E2R4V7 E2R4V7_CANFA, tr E2RTB1 E2RTB1_CANFA, tr E3SAZ8 E3SAZ8_BOVIN, tr F6X9D3 F6X9D3_HORSE</p> | <p>tVSL<br/>GAG<br/>Ak</p> | <p>93%</p> | <p>43.3</p> | <p>50.59313</p> | <p>Ref</p> | <p>-0.013</p> | <p>0.079</p> | <p>-0.39</p> | <p>-0.32</p> | <p>-0.14</p> | <p>-0.27</p> | <p>-0.14</p> | <p>18400</p> | <p>14000</p> | <p>16200</p> | <p>13100</p> | <p>15200</p> | <p>15100</p> | <p>14300</p> | <p>15600</p> | <p>706.4</p> | <p>1410.9</p> | <p>2</p> | <p>0.0062</p> | <p>4.395</p> |

|                                                                  |                                                                                                                                                                             |                                     |            |             |                 |            |               |              |              |              |              |              |              |              |              |              |              |              |              |              |              |            |               |          |               |              |
|------------------------------------------------------------------|-----------------------------------------------------------------------------------------------------------------------------------------------------------------------------|-------------------------------------|------------|-------------|-----------------|------------|---------------|--------------|--------------|--------------|--------------|--------------|--------------|--------------|--------------|--------------|--------------|--------------|--------------|--------------|--------------|------------|---------------|----------|---------------|--------------|
| <p>Nucleophosmin<br/>OS=Bos taurus<br/>GN=NPM1 PE=2<br/>SV=1</p> | <p>sp Q3T160 NPM_BOVIN, tr D2HKP0 D2HKP0_AI LME, tr D3U796 D3U796_BOVIN, tr E2R4V7 E2R4V7_CANFA, tr E2RTB1 E2RTB1_CANFA, tr E3SAZ8 E3SAZ8_BOVIN, tr F6X9D3 F6X9D3_HORSE</p> | <p>vDN<br/>DEN<br/>EHQ<br/>LSLR</p> | <p>95%</p> | <p>72.1</p> | <p>51.99744</p> | <p>Ref</p> | <p>-0.068</p> | <p>-0.07</p> | <p>-0.58</p> | <p>-0.24</p> | <p>-0.18</p> | <p>-0.11</p> | <p>-0.16</p> | <p>1E+05</p> | <p>69200</p> | <p>75200</p> | <p>59200</p> | <p>82400</p> | <p>75100</p> | <p>82300</p> | <p>79000</p> | <p>625</p> | <p>1871.9</p> | <p>3</p> | <p>0.013</p>  | <p>6.941</p> |
| <p>Nucleophosmin<br/>OS=Bos taurus<br/>GN=NPM1 PE=2<br/>SV=1</p> | <p>sp Q3T160 NPM_BOVIN, tr D2HKP0 D2HKP0_AI LME, tr D3U796 D3U796_BOVIN, tr E2R4V7 E2R4V7_CANFA, tr E2RTB1 E2RTB1_CANFA, tr E3SAZ8 E3SAZ8_BOVIN, tr F6X9D3 F6X9D3_HORSE</p> | <p>vDN<br/>DEN<br/>EHQ<br/>LSLR</p> | <p>60%</p> | <p>33</p>   | <p>51.87637</p> | <p>Ref</p> | <p>-0.13</p>  | <p>-0.01</p> | <p>-0.41</p> | <p>-0.13</p> | <p>0.17</p>  | <p>-0.67</p> | <p>0.13</p>  | <p>41400</p> | <p>34400</p> | <p>40600</p> | <p>34400</p> | <p>46100</p> | <p>49500</p> | <p>28800</p> | <p>49900</p> | <p>625</p> | <p>1871.9</p> | <p>3</p> | <p>0.0156</p> | <p>8.303</p> |



|                                                                  |                                                                                                                                                                             |                                     |            |             |                 |            |              |              |              |              |              |              |              |             |             |             |             |             |             |             |             |            |               |          |               |              |
|------------------------------------------------------------------|-----------------------------------------------------------------------------------------------------------------------------------------------------------------------------|-------------------------------------|------------|-------------|-----------------|------------|--------------|--------------|--------------|--------------|--------------|--------------|--------------|-------------|-------------|-------------|-------------|-------------|-------------|-------------|-------------|------------|---------------|----------|---------------|--------------|
| <p>Nucleophosmin<br/>OS=Bos taurus<br/>GN=NPM1 PE=2<br/>SV=1</p> | <p>sp Q3T160 NPM_BOVIN, tr D2HKP0 D2HKP0_AI LME, tr D3U796 D3U796_BOVIN, tr E2R4V7 E2R4V7_CANFA, tr E2RTB1 E2RTB1_CANFA, tr E3SAZ8 E3SAZ8_BOVIN, tr F6X9D3 F6X9D3_HORSE</p> | <p>vDN<br/>DEN<br/>EHQ<br/>LSLR</p> | <p>93%</p> | <p>45.1</p> | <p>51.97989</p> | <p>Ref</p> | <p>-0.23</p> | <p>0.036</p> | <p>-0.44</p> | <p>-0.12</p> | <p>0.15</p>  | <p>-0.32</p> | <p>0.025</p> | <p>6420</p> | <p>5180</p> | <p>6740</p> | <p>5430</p> | <p>7460</p> | <p>7860</p> | <p>5930</p> | <p>7480</p> | <p>937</p> | <p>1871.9</p> | <p>2</p> | <p>0.0138</p> | <p>7.349</p> |
| <p>Nucleophosmin<br/>OS=Bos taurus<br/>GN=NPM1 PE=2<br/>SV=1</p> | <p>sp Q3T160 NPM_BOVIN, tr D2HKP0 D2HKP0_AI LME, tr D3U796 D3U796_BOVIN, tr E2R4V7 E2R4V7_CANFA, tr E2RTB1 E2RTB1_CANFA, tr E3SAZ8 E3SAZ8_BOVIN, tr F6X9D3 F6X9D3_HORSE</p> | <p>vDN<br/>DEN<br/>EHQ<br/>LSLR</p> | <p>89%</p> | <p>43</p>   | <p>51.88355</p> | <p>Ref</p> | <p>-0.13</p> | <p>0.073</p> | <p>-0.31</p> | <p>-0.13</p> | <p>-0.11</p> | <p>-0.2</p>  | <p>-0.08</p> | <p>8500</p> | <p>7020</p> | <p>8780</p> | <p>7540</p> | <p>9440</p> | <p>8330</p> | <p>8210</p> | <p>8830</p> | <p>625</p> | <p>1871.9</p> | <p>3</p> | <p>0.0159</p> | <p>8.495</p> |

|                                                                  |                                                                                                                                                                             |                                     |            |             |                 |            |              |             |              |              |              |              |              |              |              |              |              |              |              |              |              |              |               |          |               |              |
|------------------------------------------------------------------|-----------------------------------------------------------------------------------------------------------------------------------------------------------------------------|-------------------------------------|------------|-------------|-----------------|------------|--------------|-------------|--------------|--------------|--------------|--------------|--------------|--------------|--------------|--------------|--------------|--------------|--------------|--------------|--------------|--------------|---------------|----------|---------------|--------------|
| <p>Nucleophosmin<br/>OS=Bos taurus<br/>GN=NPM1 PE=2<br/>SV=1</p> | <p>sp Q3T160 NPM_BOVIN, tr D2HKP0 D2HKP0_AI LME, tr D3U796 D3U796_BOVIN, tr E2R4V7 E2R4V7_CANFA, tr E2RTB1 E2RTB1_CANFA, tr E3SAZ8 E3SAZ8_BOVIN, tr F6X9D3 F6X9D3_HORSE</p> | <p>vDn<br/>DEN<br/>EHQ<br/>LSLR</p> | <p>95%</p> | <p>48.2</p> | <p>51.28742</p> | <p>Ref</p> | <p>0.038</p> | <p>0.14</p> | <p>-0.72</p> | <p>-0.18</p> | <p>-0.28</p> | <p>-0.27</p> | <p>-0.1</p>  | <p>9160</p>  | <p>6920</p>  | <p>8040</p>  | <p>5000</p>  | <p>7970</p>  | <p>6510</p>  | <p>6860</p>  | <p>7620</p>  | <p>937.5</p> | <p>1872.9</p> | <p>2</p> | <p>0.0134</p> | <p>7.147</p> |
| <p>Nucleophosmin<br/>OS=Bos taurus<br/>GN=NPM1 PE=2<br/>SV=1</p> | <p>sp Q3T160 NPM_BOVIN, tr D2HKP0 D2HKP0_AI LME, tr D3U796 D3U796_BOVIN, tr E2R4V7 E2R4V7_CANFA, tr E2RTB1 E2RTB1_CANFA, tr E3SAZ8 E3SAZ8_BOVIN, tr F6X9D3 F6X9D3_HORSE</p> | <p>vDn<br/>DEN<br/>EHQ<br/>LSLR</p> | <p>95%</p> | <p>68.6</p> | <p>51.28984</p> | <p>Ref</p> | <p>0.043</p> | <p>0.06</p> | <p>-0.68</p> | <p>-0.13</p> | <p>-0.18</p> | <p>-0.11</p> | <p>-0.08</p> | <p>56200</p> | <p>49800</p> | <p>54600</p> | <p>36800</p> | <p>59300</p> | <p>49900</p> | <p>54900</p> | <p>55600</p> | <p>625.3</p> | <p>1872.9</p> | <p>3</p> | <p>0.0132</p> | <p>7.022</p> |

|                                                                  |                                                                                                                                                                             |                                     |            |           |                 |            |              |              |              |              |              |              |              |              |              |              |              |              |              |              |              |              |               |          |               |              |
|------------------------------------------------------------------|-----------------------------------------------------------------------------------------------------------------------------------------------------------------------------|-------------------------------------|------------|-----------|-----------------|------------|--------------|--------------|--------------|--------------|--------------|--------------|--------------|--------------|--------------|--------------|--------------|--------------|--------------|--------------|--------------|--------------|---------------|----------|---------------|--------------|
| <p>Nucleophosmin<br/>OS=Bos taurus<br/>GN=NPM1 PE=2<br/>SV=1</p> | <p>sp Q3T160 NPM_BOVIN, tr D2HKP0 D2HKP0_AI LME, tr D3U796 D3U796_BOVIN, tr E2R4V7 E2R4V7_CANFA, tr E2RTB1 E2RTB1_CANFA, tr E3SAZ8 E3SAZ8_BOVIN, tr F6X9D3 F6X9D3_HORSE</p> | <p>vDn<br/>DEN<br/>EHQ<br/>LSLR</p> | <p>73%</p> | <p>35</p> | <p>51.08196</p> | <p>Ref</p> | <p>0.097</p> | <p>-0.14</p> | <p>-0.29</p> | <p>-0.27</p> | <p>0.005</p> | <p>-0.2</p>  | <p>-0.1</p>  | <p>12000</p> | <p>11700</p> | <p>10800</p> | <p>10900</p> | <p>12100</p> | <p>12900</p> | <p>11700</p> | <p>12400</p> | <p>625.3</p> | <p>1872.9</p> | <p>3</p> | <p>0.0176</p> | <p>9.376</p> |
| <p>Nucleophosmin<br/>OS=Bos taurus<br/>GN=NPM1 PE=2<br/>SV=1</p> | <p>sp Q3T160 NPM_BOVIN, tr D2HKP0 D2HKP0_AI LME, tr D3U796 D3U796_BOVIN, tr E2R4V7 E2R4V7_CANFA, tr E2RTB1 E2RTB1_CANFA, tr E3SAZ8 E3SAZ8_BOVIN, tr F6X9D3 F6X9D3_HORSE</p> | <p>vTLA<br/>TLK</p>                 | <p>83%</p> | <p>32</p> | <p>45.67191</p> | <p>Ref</p> | <p>-0.11</p> | <p>0.11</p>  | <p>-0.44</p> | <p>-0.15</p> | <p>-0.15</p> | <p>-0.24</p> | <p>-0.02</p> | <p>90200</p> | <p>71300</p> | <p>90300</p> | <p>69500</p> | <p>93200</p> | <p>81300</p> | <p>79900</p> | <p>92500</p> | <p>677.4</p> | <p>1352.9</p> | <p>2</p> | <p>0.0022</p> | <p>1.609</p> |

|                                                                       |                                                                                                                                                                                                                                                                                                                                      |              |     |      |          |     |       |       |      |       |      |       |      |       |      |      |       |       |       |      |       |     |        |   |        |       |
|-----------------------------------------------------------------------|--------------------------------------------------------------------------------------------------------------------------------------------------------------------------------------------------------------------------------------------------------------------------------------------------------------------------------------|--------------|-----|------|----------|-----|-------|-------|------|-------|------|-------|------|-------|------|------|-------|-------|-------|------|-------|-----|--------|---|--------|-------|
| 40S ribosomal protein S12<br>OS=Homo sapiens<br>GN=RPS12 PE=1<br>SV=3 | 8 RS12_H<br>UMAN,sp<br> P46405 <br>RS12_PIG,<br>sp Q7618<br>1 RS12_B<br>OVIN,tr D<br>2I741 D2I<br>741_AILM<br>E,tr D3ZH<br>B3 D3ZH<br>B3_RAT,tr<br> D3ZMD2<br> D3ZMD2<br>_RAT,tr E<br>2R4N7 E2<br>R4N7_CA<br>NFA,tr F1<br>M185 F1<br>M185_RA<br>T,tr F1N5<br>72 F1N57<br>2_BOVIN,<br>tr F2X216<br> F2X216_<br>AILME,tr <br>F6SIP5 F6 | dVIE<br>EYFK | 95% | 48.5 | 52.90849 | Ref | 0.26  | 0.071 | 0.26 | 0.2   | 0.23 | -0.1  | 0.14 | 8710  | 9330 | 8900 | 11400 | 12000 | 10700 | 8920 | 10500 | 826 | 1649.9 | 2 | 0.0171 | 10.33 |
| 40S ribosomal protein S12<br>OS=Homo sapiens<br>GN=RPS12 PE=1<br>SV=3 | 8 RS12_H<br>UMAN,sp<br> P46405 <br>RS12_PIG,<br>sp Q7618<br>1 RS12_B<br>OVIN,tr D<br>2I741 D2I<br>741_AILM<br>E,tr D3ZH<br>B3 D3ZH<br>B3_RAT,tr<br> D3ZMD2<br> D3ZMD2<br>_RAT,tr E<br>2R4N7 E2<br>R4N7_CA<br>NFA,tr F1<br>M185 F1<br>M185_RA<br>T,tr F1N5<br>72 F1N57<br>2_BOVIN,<br>tr F2X216<br> F2X216_<br>AILME,tr <br>F6SIP5 F6 | dVIE<br>EYFK | 74% | 36.4 | 52.89341 | Ref | 0.063 | -0.03 | 0.34 | 0.095 | 0.31 | -0.12 | 0.15 | 10900 | 8790 | 8960 | 13000 | 12100 | 12200 | 9490 | 11400 | 826 | 1649.9 | 2 | 0.0107 | 6.494 |

|                                                                       |                                                                                                                                                                                                                                                                                                                                      |              |     |      |          |     |        |      |      |       |      |      |      |       |       |       |       |       |       |       |       |     |        |   |        |       |
|-----------------------------------------------------------------------|--------------------------------------------------------------------------------------------------------------------------------------------------------------------------------------------------------------------------------------------------------------------------------------------------------------------------------------|--------------|-----|------|----------|-----|--------|------|------|-------|------|------|------|-------|-------|-------|-------|-------|-------|-------|-------|-----|--------|---|--------|-------|
| 40S ribosomal protein S12<br>OS=Homo sapiens<br>GN=RPS12 PE=1<br>SV=3 | 8 RS12_H<br>UMAN,sp<br> P46405 <br>RS12_PIG,<br>sp Q76I8<br>1 RS12_B<br>OVIN,tr D<br>2I741 D2I<br>741_AILM<br>E,tr D3ZH<br>B3 D3ZH<br>B3_RAT,tr<br> D3ZMD2<br> D3ZMD2<br>_RAT,tr E<br>2R4N7 E2<br>R4N7_CA<br>NFA,tr F1<br>M185 F1<br>M185_RA<br>T,tr F1N5<br>72 F1N57<br>2_BOVIN,<br>tr F2X216<br> F2X216_<br>AILME,tr <br>F6SIP5 F6 | dVIE<br>EYFK | 85% | 41.3 | 52.89936 | Ref | -0.007 | -0.1 | 0.29 | 0.19  | 0.2  | 0.06 | 0.37 | 25500 | 22500 | 22900 | 33700 | 34600 | 30500 | 28800 | 35500 | 551 | 1649.9 | 3 | 0.0087 | 5.244 |
| 40S ribosomal protein S12<br>OS=Homo sapiens<br>GN=RPS12 PE=1<br>SV=3 | 8 RS12_H<br>UMAN,sp<br> P46405 <br>RS12_PIG,<br>sp Q76I8<br>1 RS12_B<br>OVIN,tr D<br>2I741 D2I<br>741_AILM<br>E,tr D3ZH<br>B3 D3ZH<br>B3_RAT,tr<br> D3ZMD2<br> D3ZMD2<br>_RAT,tr E<br>2R4N7 E2<br>R4N7_CA<br>NFA,tr F1<br>M185 F1<br>M185_RA<br>T,tr F1N5<br>72 F1N57<br>2_BOVIN,<br>tr F2X216<br> F2X216_<br>AILME,tr <br>F6SIP5 F6 | dVIE<br>EYFK | 85% | 41.6 | 52.86995 | Ref | -0.005 | -0.1 | 0.21 | 0.058 | 0.24 | 0.16 | 0.46 | 25500 | 23000 | 23300 | 32500 | 32300 | 32000 | 31700 | 38800 | 551 | 1649.9 | 3 | 0.0019 | 1.137 |

|                                                                       |                                                                                                                                                                                                                                                                                                                                      |                             |     |      |          |     |        |       |       |       |     |       |      |      |      |      |      |      |      |      |       |       |        |   |        |       |
|-----------------------------------------------------------------------|--------------------------------------------------------------------------------------------------------------------------------------------------------------------------------------------------------------------------------------------------------------------------------------------------------------------------------------|-----------------------------|-----|------|----------|-----|--------|-------|-------|-------|-----|-------|------|------|------|------|------|------|------|------|-------|-------|--------|---|--------|-------|
| 40S ribosomal protein S12<br>OS=Homo sapiens<br>GN=RPS12 PE=1<br>SV=3 | 8 RS12_H<br>UMAN,sp<br> P46405 <br>RS12_PIG,<br>sp Q7618<br>1 RS12_B<br>OVIN,tr D<br>2I741 D2I<br>741_AILM<br>E,tr D3ZH<br>B3 D3ZH<br>B3_RAT,tr<br> D3ZMD2<br> D3ZMD2<br>_RAT,tr E<br>2R4N7 E2<br>R4N7_CA<br>NFA,tr F1<br>M185 F1<br>M185_RA<br>T,tr F1N5<br>72 F1N57<br>2_BOVIN,<br>tr F2X216<br> F2X216_<br>AILME,tr <br>F6SIP5 F6 | dVIE<br>EYFK                | 83% | 40.9 | 53.28212 | Ref | -0.033 | 0.081 | 0.053 | 0.12  | 0.2 | 0.22  | 0.38 | 7260 | 6300 | 7400 | 8140 | 9420 | 8700 | 9190 | 10200 | 551   | 1649.9 | 3 | 0.0222 | 13.46 |
| 40S ribosomal protein S12<br>OS=Homo sapiens<br>GN=RPS12 PE=1<br>SV=3 | 8 RS12_H<br>UMAN,sp<br> P46405 <br>RS12_PIG,<br>sp Q7618<br>1 RS12_B<br>OVIN,tr D<br>2I741 D2I<br>741_AILM<br>E,tr D3ZH<br>B3 D3ZH<br>B3_RAT,tr<br> D3ZMD2<br> D3ZMD2<br>_RAT,tr E<br>2R4N7 E2<br>R4N7_CA<br>NFA,tr F1<br>M185 F1<br>M185_RA<br>T,tr F1N5<br>72 F1N57<br>2_BOVIN,<br>tr F2X216<br> F2X216_<br>AILME,tr <br>F6SIP5 F6 | IVEA<br>LcAE<br>HQI<br>NLIK | 94% | 52   | 53.85654 | Ref | 0.16   | -0.28 | 0.4   | 0.015 | 0.2 | -0.01 | 0.12 | 596  | 456  | 365  | 659  | 554  | 549  | 495  | 538   | 783.4 | 2347.3 | 3 | 0.0152 | 6.493 |

|                                                                       |                                                                                                                                                                                                                                                                                                                                      |                             |     |      |          |     |       |       |      |       |      |       |      |     |     |     |     |     |     |     |     |       |        |   |        |       |
|-----------------------------------------------------------------------|--------------------------------------------------------------------------------------------------------------------------------------------------------------------------------------------------------------------------------------------------------------------------------------------------------------------------------------|-----------------------------|-----|------|----------|-----|-------|-------|------|-------|------|-------|------|-----|-----|-----|-----|-----|-----|-----|-----|-------|--------|---|--------|-------|
| 40S ribosomal protein S12<br>OS=Homo sapiens<br>GN=RPS12 PE=1<br>SV=3 | 8 RS12_H<br>UMAN,sp<br> P46405 <br>RS12_PIG,<br>sp Q7618<br>1 RS12_B<br>OVIN,tr D<br>2I741 D2I<br>741_AILM<br>E,tr D3ZH<br>B3 D3ZH<br>B3_RAT,tr<br> D3ZMD2<br> D3ZMD2<br>_RAT,tr E<br>2R4N7 E2<br>R4N7_CA<br>NFA,tr F1<br>M185 F1<br>M185_RA<br>T,tr F1N5<br>72 F1N57<br>2_BOVIN,<br>tr F2X216<br> F2X216_<br>AILME,tr <br>F6SIP5 F6 | IVEA<br>LcAE<br>HQI<br>NLIK | 93% | 48.8 | 53.67032 | Ref | 0.087 | 0.02  | 0.33 | 0.072 | 0.32 | -0.01 | 0.12 | 649 | 567 | 588 | 817 | 754 | 781 | 650 | 704 | 783.4 | 2347.3 | 3 | 0.0094 | 4.002 |
| 40S ribosomal protein S12<br>OS=Homo sapiens<br>GN=RPS12 PE=1<br>SV=3 | 8 RS12_H<br>UMAN,sp<br> P46405 <br>RS12_PIG,<br>sp Q7618<br>1 RS12_B<br>OVIN,tr D<br>2I741 D2I<br>741_AILM<br>E,tr D3ZH<br>B3 D3ZH<br>B3_RAT,tr<br> D3ZMD2<br> D3ZMD2<br>_RAT,tr E<br>2R4N7 E2<br>R4N7_CA<br>NFA,tr F1<br>M185 F1<br>M185_RA<br>T,tr F1N5<br>72 F1N57<br>2_BOVIN,<br>tr F2X216<br> F2X216_<br>AILME,tr <br>F6SIP5 F6 | IVEA<br>LcAE<br>HQI<br>NLIK | 95% | 56   | 53.82048 | Ref | 0.018 | -0.21 | 0.4  | 0.14  | 0.3  | 0.003 | 0.3  | 410 | 360 | 333 | 571 | 528 | 513 | 437 | 534 | 783.4 | 2347.3 | 3 | 0.0151 | 6.416 |

|                                                                       |                                                                                                                                                                                                                                                                                                                                                   |     |      |          |     |      |       |      |       |       |      |       |       |       |       |       |       |       |       |       |       |        |   |        |       |
|-----------------------------------------------------------------------|---------------------------------------------------------------------------------------------------------------------------------------------------------------------------------------------------------------------------------------------------------------------------------------------------------------------------------------------------|-----|------|----------|-----|------|-------|------|-------|-------|------|-------|-------|-------|-------|-------|-------|-------|-------|-------|-------|--------|---|--------|-------|
| 40S ribosomal protein S12<br>OS=Homo sapiens<br>GN=RPS12 PE=1<br>SV=3 | 8 RS12_H<br>UMAN,sp<br> P46405 <br>RS12_PIG,<br>sp Q7618<br>1 RS12_B<br>OVIN,tr D<br>2I741 D2I<br>741_AILM<br>E,tr D3ZH<br>B3 D3ZH<br>B3_RAT,tr<br> D3ZMD2<br> D3ZMD2<br>_RAT,tr E<br>2R4N7 E2<br>R4N7_CA<br>NFA,tr F1<br>M185 F1<br>M185_RA<br>T,tr F1N5<br>72 F1N57<br>2_BOVIN,<br>tr F2X216<br> F2X216_ tALI<br>AILME,tr  HDG<br>F6SIP5 F6 LAR | 95% | 50.8 | 51.91636 | Ref | 0.34 | 0.079 | 0.32 | 0.034 | 0.065 | 0.18 | 0.066 | 10800 | 12500 | 11400 | 15000 | 13600 | 12100 | 13700 | 12600 | 457.6 | 1369.8 | 3 | 0.0129 | 9.384 |
| 40S ribosomal protein S12<br>OS=Homo sapiens<br>GN=RPS12 PE=1<br>SV=3 | 8 RS12_H<br>UMAN,sp<br> P46405 <br>RS12_PIG,<br>sp Q7618<br>1 RS12_B<br>OVIN,tr D<br>2I741 D2I<br>741_AILM<br>E,tr D3ZH<br>B3 D3ZH<br>B3_RAT,tr<br> D3ZMD2<br> D3ZMD2<br>_RAT,tr E<br>2R4N7 E2<br>R4N7_CA<br>NFA,tr F1<br>M185 F1<br>M185_RA<br>T,tr F1N5<br>72 F1N57<br>2_BOVIN,<br>tr F2X216<br> F2X216_ tALI<br>AILME,tr  HDG<br>F6SIP5 F6 LAR | 82% | 39.1 | 51.81889 | Ref | 0.06 | -0.35 | 0.3  | -0.06 | 0.28  | 0.34 | 0.27  | 7150  | 6130  | 5020  | 8820  | 7570  | 8350  | 9080  | 8630  | 457.6 | 1369.8 | 3 | 0.0094 | 6.846 |



|                                                                       |                                                                                                                                                                                                                                                                                                                                                   |     |      |          |     |      |       |      |        |      |       |      |       |       |       |       |       |       |       |       |       |        |   |        |       |
|-----------------------------------------------------------------------|---------------------------------------------------------------------------------------------------------------------------------------------------------------------------------------------------------------------------------------------------------------------------------------------------------------------------------------------------|-----|------|----------|-----|------|-------|------|--------|------|-------|------|-------|-------|-------|-------|-------|-------|-------|-------|-------|--------|---|--------|-------|
| 40S ribosomal protein S12<br>OS=Homo sapiens<br>GN=RPS12 PE=1<br>SV=3 | 8 RS12_H<br>UMAN,sp<br> P46405 <br>RS12_PIG,<br>sp Q76I8<br>1 RS12_B<br>OVIN,tr D<br>2I741 D2I<br>741_AILM<br>E,tr D3ZH<br>B3 D3ZH<br>B3_RAT,tr<br> D3ZMD2<br> D3ZMD2<br>_RAT,tr E<br>2R4N7 E2<br>R4N7_CA<br>NFA,tr F1<br>M185 F1<br>M185_RA<br>T,tr F1N5<br>72 F1N57<br>2_BOVIN,<br>tr F2X216<br> F2X216_ tALI<br>AILME,tr  HDG<br>F6SIP5 F6 LAR | 95% | 53.5 | 51.90334 | Ref | 0.42 | -0.06 | 0.5  | -0.11  | 0.14 | -0.11 | 0.11 | 15500 | 17500 | 13600 | 22500 | 16200 | 16900 | 14900 | 17100 | 457.6 | 1369.8 | 3 | 0.0123 | 8.99  |
| 40S ribosomal protein S12<br>OS=Homo sapiens<br>GN=RPS12 PE=1<br>SV=3 | 8 RS12_H<br>UMAN,sp<br> P46405 <br>RS12_PIG,<br>sp Q76I8<br>1 RS12_B<br>OVIN,tr D<br>2I741 D2I<br>741_AILM<br>E,tr D3ZH<br>B3 D3ZH<br>B3_RAT,tr<br> D3ZMD2<br> D3ZMD2<br>_RAT,tr E<br>2R4N7 E2<br>R4N7_CA<br>NFA,tr F1<br>M185 F1<br>M185_RA<br>T,tr F1N5<br>72 F1N57<br>2_BOVIN,<br>tr F2X216<br> F2X216_ tALI<br>AILME,tr  HDG<br>F6SIP5 F6 LAR | 83% | 39.3 | 51.90068 | Ref | 0.29 | -0.07 | 0.35 | -0.025 | 0.42 | -0.25 | 0.26 | 16900 | 18800 | 15900 | 23700 | 20200 | 24000 | 15700 | 22300 | 457.6 | 1369.8 | 3 | 0.0092 | 6.714 |

|                                                                                 |                                                                                                                                                                                                                              |                           |     |      |          |     |      |      |       |        |      |       |       |       |       |       |       |       |       |       |       |       |        |   |        |       |
|---------------------------------------------------------------------------------|------------------------------------------------------------------------------------------------------------------------------------------------------------------------------------------------------------------------------|---------------------------|-----|------|----------|-----|------|------|-------|--------|------|-------|-------|-------|-------|-------|-------|-------|-------|-------|-------|-------|--------|---|--------|-------|
| 40S ribosomal protein S12<br>OS=Homo sapiens<br>GN=RPS12 PE=1<br>SV=3           | 8 RS12_HUMAN,sp P46405 RS12_PIG,sp Q76181 RS12_BOVIN,triD21741 D21741_AILME,triD32HB3 D32HB3_RAT,triD3ZMD2 D3ZMD2_RAT,triE2R4N7 E2R4N7_CANFA,triF1M185 F1M185_RAT,triF1N572 F1N572_BOVIN,triF2X216 F2X216_AILME,triF651P5 F6 | tALI<br>HDG<br>LAR        | 79% | 38.1 | 52.18449 | Ref | 0.29 | 0.16 | 0.13  | 0.026  | 0.09 | 0.15  | 0.13  | 7400  | 7610  | 7530  | 8250  | 8490  | 7740  | 8450  | 8270  | 457.6 | 1369.8 | 3 | 0.0139 | 10.13 |
| Stress-70 protein, mitochondrial<br>OS=Cricetulus griseus GN=HSPA9<br>PE=2 SV=1 | sp O35501 GRP75_CRIGR,sp P38646 GRP75_HUMAN,sp P38647 GRP75_MOUSE,sp Q3ZCH0 GRP75_BOVIN,sp Q5R511 GRP75_PONAB,triB7Z4V2 B7Z4V2_HUMAN,triD2HK99 D2HK99_AILME,triQ7TSZ0 Q7TSZ0_MOUSE,triQ8N1C8 Q8N1C8_HUMAN                    | aSnG<br>DAW<br>VEA<br>HGK | 83% | 41   | 53.35619 | Ref | 0.23 | 0.14 | 0.024 | -0.094 | -0.2 | -0.08 | -0.12 | 16300 | 16800 | 17100 | 17700 | 18000 | 14600 | 16500 | 15900 | 651   | 1950   | 3 | 0.0202 | 10.35 |

|                                                                                 |                                                                                                                                                                                                                       |                     |   |     |      |          |     |        |       |      |       |       |       |       |       |       |       |       |       |       |       |       |       |        |   |        |       |
|---------------------------------------------------------------------------------|-----------------------------------------------------------------------------------------------------------------------------------------------------------------------------------------------------------------------|---------------------|---|-----|------|----------|-----|--------|-------|------|-------|-------|-------|-------|-------|-------|-------|-------|-------|-------|-------|-------|-------|--------|---|--------|-------|
| Stress-70 protein, mitochondrial<br>OS=Cricetulus griseus GN=HSPA9<br>PE=2 SV=1 | sp O35501 GRP75_CRIGR,sp P38646 GRP75_HUMAN,sp P38647 GRP75_MOUSE,sp Q3ZCH0 GRP75_BOVIN,sp Q5R511 GRP75_PONAB,trans B7Z4V2 B7Z4V2_HUMAN,trans D2HK99 D2HK99_AILME,trans Q7TSZ0 Q7TSZ0_MOUSE,trans Q8N1C8 Q8N1C8_HUMAN | dAG<br>QISG<br>LNVL | R | 95% | 48.2 | 52.41848 | Ref | 0.2    | -0.09 | 0.12 | -0.14 | -0.13 | 0.04  | -0.08 | 19100 | 19300 | 17100 | 22300 | 20400 | 18000 | 21200 | 19400 | 773.9 | 1545.9 | 2 | 0.0118 | 7.641 |
| Stress-70 protein, mitochondrial<br>OS=Cricetulus griseus GN=HSPA9<br>PE=2 SV=1 | sp O35501 GRP75_CRIGR,sp P38646 GRP75_HUMAN,sp P38647 GRP75_MOUSE,sp Q3ZCH0 GRP75_BOVIN,sp Q5R511 GRP75_PONAB,trans B7Z4V2 B7Z4V2_HUMAN,trans D2HK99 D2HK99_AILME,trans Q7TSZ0 Q7TSZ0_MOUSE,trans Q8N1C8 Q8N1C8_HUMAN | dSET<br>GENI        | R | 80% | 35.7 | 50.49641 | Ref | -0.026 | -0.04 | 0.19 | -0.18 | -0.03 | -0.14 | 0.056 | 16200 | 13100 | 14100 | 18500 | 15800 | 15300 | 14800 | 16800 | 662.8 | 1323.6 | 2 | 0.0111 | 8.374 |

|                                                                                       |                                                                                                                                                                                                                                                                                                               |                          |     |      |          |     |       |       |       |       |       |       |       |       |       |       |       |       |       |       |       |       |        |   |        |       |
|---------------------------------------------------------------------------------------|---------------------------------------------------------------------------------------------------------------------------------------------------------------------------------------------------------------------------------------------------------------------------------------------------------------|--------------------------|-----|------|----------|-----|-------|-------|-------|-------|-------|-------|-------|-------|-------|-------|-------|-------|-------|-------|-------|-------|--------|---|--------|-------|
| Stress-70 protein,<br>mitochondrial<br>OS=Cricetulus<br>griseus GN=HSPA9<br>PE=2 SV=1 | sp O3550<br>1 GRP75_<br>CRIGR,sp <br>P38646 G<br>RP75_HU<br>MAN,sp P<br>38647 GR<br>P75_MOU<br>SE,sp Q3Z<br>CH0 GRP<br>75_BOVIN<br>,sp Q5R5<br>11 GRP75<br>_PONAB,t<br>r B7Z4V2<br> B7Z4V2_<br>HUMAN,t<br>r D2HK99<br> D2HK99_<br>AILME,tr <br>Q7TSZ0 Q<br>7TSZ0_M<br>OUSE,tr <br>Q8N1C8 <br>Q8N1C8_<br>HUMAN | eGS<br>GSS<br>GTG<br>EQk | 95% | 54.4 | 52.20493 | Ref | -0.21 | -0.08 | 0.085 | 0.092 | 0.023 | -0.33 | -0.15 | 21900 | 12600 | 14900 | 18800 | 20800 | 17300 | 14200 | 15900 | 578   | 1730.9 | 3 | 0.0123 | 7.078 |
| Stress-70 protein,<br>mitochondrial<br>OS=Cricetulus<br>griseus GN=HSPA9<br>PE=2 SV=1 | sp O3550<br>1 GRP75_<br>CRIGR,sp <br>P38646 G<br>RP75_HU<br>MAN,sp P<br>38647 GR<br>P75_MOU<br>SE,sp Q3Z<br>CH0 GRP<br>75_BOVIN<br>,sp Q5R5<br>11 GRP75<br>_PONAB,t<br>r B7Z4V2<br> B7Z4V2_<br>HUMAN,t<br>r D2HK99<br> D2HK99_<br>AILME,tr <br>Q7TSZ0 Q<br>7TSZ0_M<br>OUSE,tr <br>Q8N1C8 <br>Q8N1C8_<br>HUMAN | eGS<br>GSS<br>GTG<br>EQk | 93% | 45.3 | 52.25413 | Ref | -0.07 | 0.01  | 0.19  | -0.12 | 0.074 | -0.32 | -0.07 | 4940  | 3630  | 4160  | 5270  | 4700  | 4700  | 3730  | 4420  | 866.4 | 1730.9 | 2 | 0.0112 | 6.474 |

|                                                                                       |                                                                                                                                                                                                                                                                                                               |                                    |     |      |          |     |        |       |      |        |       |       |       |       |       |       |       |       |       |       |       |       |        |   |        |       |
|---------------------------------------------------------------------------------------|---------------------------------------------------------------------------------------------------------------------------------------------------------------------------------------------------------------------------------------------------------------------------------------------------------------|------------------------------------|-----|------|----------|-----|--------|-------|------|--------|-------|-------|-------|-------|-------|-------|-------|-------|-------|-------|-------|-------|--------|---|--------|-------|
| Stress-70 protein,<br>mitochondrial<br>OS=Cricetulus<br>griseus GN=HSPA9<br>PE=2 SV=1 | sp O3550<br>1 GRP75_<br>CRIGR,sp <br>P38646 G<br>RP75_HU<br>MAN,sp P<br>38647 GR<br>P75_MOU<br>SE,sp Q3Z<br>CH0 GRP<br>75_BOVIN<br>,sp Q5R5<br>11 GRP75<br>_PONAB,t<br>r B7Z4V2<br> B7Z4V2_<br>HUMAN,t<br>r D2HK99<br> D2HK99_<br>AILME,tr <br>Q7TSZ0 Q<br>7TSZ0_M<br>OUSE,tr <br>Q8N1C8 <br>Q8N1C8_<br>HUMAN | kSQV<br>FSTA<br>ADG<br>QTQ<br>VEIK | 95% | 52.4 | 54.36512 | Ref | 0.037  | -0.08 | 0.1  | -0.061 | 0.1   | -0.13 | -0.09 | 12800 | 11200 | 11200 | 14300 | 14000 | 13700 | 12200 | 12400 | 713.2 | 2848.6 | 4 | 0.0353 | 12.37 |
| Stress-70 protein,<br>mitochondrial<br>OS=Cricetulus<br>griseus GN=HSPA9<br>PE=2 SV=1 | sp O3550<br>1 GRP75_<br>CRIGR,sp <br>P38646 G<br>RP75_HU<br>MAN,sp P<br>38647 GR<br>P75_MOU<br>SE,sp Q3Z<br>CH0 GRP<br>75_BOVIN<br>,sp Q5R5<br>11 GRP75<br>_PONAB,t<br>r B7Z4V2<br> B7Z4V2_<br>HUMAN,t<br>r D2HK99<br> D2HK99_<br>AILME,tr <br>Q7TSZ0 Q<br>7TSZ0_M<br>OUSE,tr <br>Q8N1C8 <br>Q8N1C8_<br>HUMAN | IYSPS<br>QIGA<br>FVL<br>MK         | 95% | 54.9 | 52.80184 | Ref | -0.025 | -0.21 | 0.14 | -0.1   | -0.22 | 0.12  | 0.23  | 2180  | 1950  | 1860  | 2650  | 2480  | 1990  | 2630  | 2820  | 721.4 | 2161.2 | 3 | 0.0099 | 4.562 |

|                                                                           |                                                                                                                                                                                                               |                          |     |      |          |     |       |       |       |       |       |       |      |       |       |       |       |       |       |       |       |       |        |   |        |       |
|---------------------------------------------------------------------------|---------------------------------------------------------------------------------------------------------------------------------------------------------------------------------------------------------------|--------------------------|-----|------|----------|-----|-------|-------|-------|-------|-------|-------|------|-------|-------|-------|-------|-------|-------|-------|-------|-------|--------|---|--------|-------|
| Stress-70 protein, mitochondrial OS=Cricetulus griseus GN=HSPA9 PE=2 SV=1 | sp O35501 GRP75_CRIGR,sp P38646 GRP75_HUMAN,sp P38647 GRP75_MOUSE,sp Q3ZCH0 GRP75_BOVIN,sp Q5R511 GRP75_PONAB,tra B7Z4V2 B7Z4V2_HUMAN,tra D2HK99 D2HK99_AILME,tra Q7TSZ0 Q7TSZ0_MOUSE,tra Q8N1C8 Q8N1C8_HUMAN | qAAS<br>SLQ<br>QASL<br>k | 72% | 35.3 | 52.32582 | Ref | 0.044 | 0.036 | 0.27  | -0.26 | 0.018 | -0.44 | 0.26 | 255   | 252   | 271   | 359   | 274   | 290   | 220   | 354   | 759.9 | 1517.8 | 2 | 0.0117 | 7.7   |
| Stress-70 protein, mitochondrial OS=Cricetulus griseus GN=HSPA9 PE=2 SV=1 | sp O35501 GRP75_CRIGR,sp P38646 GRP75_HUMAN,sp P38647 GRP75_MOUSE,sp Q3ZCH0 GRP75_BOVIN,sp Q5R511 GRP75_PONAB,tra B7Z4V2 B7Z4V2_HUMAN,tra D2HK99 D2HK99_AILME,tra Q7TSZ0 Q7TSZ0_MOUSE,tra Q8N1C8 Q8N1C8_HUMAN | qAAS<br>SLQ<br>QASL<br>k | 88% | 43.2 | 52.63485 | Ref | 0.12  | -0.04 | -0.12 | -0.2  | 0.15  | -0.29 | 0.22 | 12400 | 11600 | 11200 | 12000 | 12400 | 13900 | 10700 | 15100 | 614   | 1839.1 | 3 | 0.0141 | 7.682 |

|                                                                                       |                                                                                                                                                                                                                                                                                                               |                                    |     |      |          |     |        |       |       |       |       |       |       |       |      |       |       |       |       |       |       |       |        |   |        |       |
|---------------------------------------------------------------------------------------|---------------------------------------------------------------------------------------------------------------------------------------------------------------------------------------------------------------------------------------------------------------------------------------------------------------|------------------------------------|-----|------|----------|-----|--------|-------|-------|-------|-------|-------|-------|-------|------|-------|-------|-------|-------|-------|-------|-------|--------|---|--------|-------|
| Stress-70 protein,<br>mitochondrial<br>OS=Cricetulus<br>griseus GN=HSPA9<br>PE=2 SV=1 | sp O3550<br>1 GRP75_<br>CRIGR,sp <br>P38646 G<br>RP75_HU<br>MAN,sp P<br>38647 GR<br>P75_MOU<br>SE,sp Q3Z<br>CH0 GRP<br>75_BOVIN<br>,sp Q5R5<br>11 GRP75<br>_PONAB,t<br>r B7Z4V2<br> B7Z4V2_<br>HUMAN,t<br>r D2HK99<br> D2HK99_<br>AILME,tr <br>Q7TSZ0 Q<br>7TSZ0_M<br>OUSE,tr <br>Q8N1C8 <br>Q8N1C8_<br>HUMAN | sQVF<br>STAA<br>DGQ,<br>TQV<br>EIk | 91% | 47.4 | 54.653   | Ref | -0.16  | -0.18 | 0.3   | -0.26 | 0.031 | 0.021 | -0.03 | 7990  | 5650 | 6030  | 9450  | 7050  | 7560  | 7840  | 7490  | 806.4 | 2416.3 | 3 | 0.0175 | 7.239 |
| Stress-70 protein,<br>mitochondrial<br>OS=Cricetulus<br>griseus GN=HSPA9<br>PE=2 SV=1 | sp O3550<br>1 GRP75_<br>CRIGR,sp <br>P38646 G<br>RP75_HU<br>MAN,sp P<br>38647 GR<br>P75_MOU<br>SE,sp Q3Z<br>CH0 GRP<br>75_BOVIN<br>,sp Q5R5<br>11 GRP75<br>_PONAB,t<br>r B7Z4V2<br> B7Z4V2_<br>HUMAN,t<br>r D2HK99<br> D2HK99_<br>AILME,tr <br>Q7TSZ0 Q<br>7TSZ0_M<br>OUSE,tr <br>Q8N1C8 <br>Q8N1C8_<br>HUMAN | tTPS<br>VVA<br>FTAD<br>GER         | 89% | 42.3 | 52.88828 | Ref | 0.0051 | 0.071 | 0.057 | -0.22 | 0.036 | -0.04 | 0.033 | 10400 | 9320 | 10600 | 11800 | 10700 | 11200 | 11100 | 11600 | 878   | 1753.9 | 2 | 0.0103 | 5.897 |

|                                                                           |                                                                                                                                                                                                           |                                  |     |      |          |     |       |       |       |        |       |       |       |       |       |       |       |       |       |       |       |       |        |   |        |       |
|---------------------------------------------------------------------------|-----------------------------------------------------------------------------------------------------------------------------------------------------------------------------------------------------------|----------------------------------|-----|------|----------|-----|-------|-------|-------|--------|-------|-------|-------|-------|-------|-------|-------|-------|-------|-------|-------|-------|--------|---|--------|-------|
| Stress-70 protein, mitochondrial OS=Cricetulus griseus GN=HSPA9 PE=2 SV=1 | sp O35501 GRP75_CRIGR,sp P38646 GRP75_HUMAN,sp P38647 GRP75_MOUSE,sp Q3ZCH0 GRP75_BOVIN,sp Q5R511 GRP75_PONAB,tr B7Z4V2 B7Z4V2_HUMAN,tr D2HK99 D2HK99_AILME,tr Q7TSZ0 Q7TSZ0_MOUSE,tr Q8N1C8 Q8N1C8_HUMAN | vLEnAEGAR                        | 60% | 31.6 | 50.73392 | Ref | 0.018 | 0.009 | 0.21  | -0.15  | 0.049 | -0.18 | 0.012 | 29100 | 27000 | 29100 | 37600 | 32100 | 32300 | 28800 | 32600 | 632.3 | 1262.7 | 2 | 0.0101 | 8     |
| Fructose-bisphosphate aldolase OS=Bos taurus GN=ALDOA PE=2 SV=1           | tr A6QLL8 A6QLL8_BOVIN                                                                                                                                                                                    | aAQEEYV                          | 84% | 38.9 | 52.18598 | Ref | 0.15  | 0.16  | 0.023 | -0.094 | 0.12  | -0.31 | 0.062 | 6690  | 5370  | 5840  | 5980  | 6080  | 6150  | 4760  | 6130  | 773.4 | 1544.9 | 2 | 0.0114 | 7.406 |
| Fructose-bisphosphate aldolase OS=Bos taurus GN=ALDOA PE=2 SV=1           | tr A6QLL8 A6QLL8_BOVIN                                                                                                                                                                                    | aGA<br>AASE<br>SLFIS<br>NHA<br>y | 94% | 51.7 | 54.35293 | Ref | 0.12  | 0.01  | -0.07 | -0.022 | 0.089 | 0.093 | 0.13  | 9930  | 8930  | 8950  | 9530  | 10800 | 10200 | 10700 | 10900 | 739.7 | 2216.2 | 3 | 0.0136 | 6.128 |
| Fructose-bisphosphate aldolase OS=Bos taurus GN=ALDOA PE=2 SV=1           | tr A6QLL8 A6QLL8_BOVIN                                                                                                                                                                                    | aGA<br>AASE<br>SLFIS<br>NHA<br>y | 95% | 65.3 | 54.34485 | Ref | 0.13  | 0.095 | -0.07 | -0.01  | 0.13  | -0.05 | 0.095 | 8790  | 7690  | 8160  | 8150  | 9390  | 9010  | 8360  | 9140  | 739.7 | 2216.2 | 3 | 0.016  | 7.211 |



|                                                                             |                                |                            |     |      |          |     |       |       |       |       |       |       |       |       |       |       |       |       |       |       |       |       |        |   |        |       |
|-----------------------------------------------------------------------------|--------------------------------|----------------------------|-----|------|----------|-----|-------|-------|-------|-------|-------|-------|-------|-------|-------|-------|-------|-------|-------|-------|-------|-------|--------|---|--------|-------|
| Fructose-<br>biphosphate<br>aldolase OS=Bos<br>taurus GN=ALDOA<br>PE=2 SV=1 | tr A6QLL8<br> A6QLL8_<br>BOVIN | aLAN<br>SLAc<br>qGk        | 91% | 46.6 | 53.01392 | Ref | 0.069 | -0.1  | 0.18  | -0.16 | 0.18  | 0.052 | 0.23  | 1560  | 1470  | 1420  | 1930  | 1680  | 1850  | 1780  | 1990  | 577.6 | 1729.9 | 3 | 0.0092 | 5.286 |
| Fructose-<br>biphosphate<br>aldolase OS=Bos<br>taurus GN=ALDOA<br>PE=2 SV=1 | tr A6QLL8<br> A6QLL8_<br>BOVIN | aLAn<br>SLAc<br>qGk        | 90% | 44.8 | 52.99978 | Ref | 0.11  | 0.22  | 0.075 | -0.11 | 0.11  | 0.18  | 0.034 | 567   | 627   | 731   | 744   | 724   | 736   | 805   | 721   | 578   | 1730.9 | 3 | #####  | 0.317 |
| Fructose-<br>biphosphate<br>aldolase OS=Bos<br>taurus GN=ALDOA<br>PE=2 SV=1 | tr A6QLL8<br> A6QLL8_<br>BOVIN | aLQA<br>SALK               | 75% | 33.9 | 49.32245 | Ref | 0.69  | -0.13 | 0.091 | 0.022 | -0.23 | -0.04 | -0.11 | 24600 | 35800 | 22000 | 28800 | 30300 | 22100 | 26400 | 24900 | 470.6 | 1408.9 | 3 | 0.0089 | 6.307 |
| Fructose-<br>biphosphate<br>aldolase OS=Bos<br>taurus GN=ALDOA<br>PE=2 SV=1 | tr A6QLL8<br> A6QLL8_<br>BOVIN | eLcD<br>IAHR               | 90% | 40.7 | 48.91247 | Ref | 0.49  | -0.17 | 0.26  | -0.21 | 0.21  | -0.21 | -0.13 | 13400 | 16000 | 10900 | 16500 | 13200 | 15300 | 12000 | 12600 | 436.2 | 1305.6 | 3 | 0.0167 | 12.75 |
| Fructose-<br>biphosphate<br>aldolase OS=Bos<br>taurus GN=ALDOA<br>PE=2 SV=1 | tr A6QLL8<br> A6QLL8_<br>BOVIN | gGV<br>YGIK                | 76% | 31.3 | 47.17504 | Ref | 0.69  | -0.24 | 0.099 | -0.15 | -0.09 | -0.1  | -0.1  | 38500 | 49800 | 28400 | 40400 | 37500 | 34000 | 35500 | 35200 | 619.4 | 1236.8 | 2 | 0.0072 | 5.8   |
| Fructose-<br>biphosphate<br>aldolase OS=Bos<br>taurus GN=ALDOA<br>PE=2 SV=1 | tr A6QLL8<br> A6QLL8_<br>BOVIN | gLLA<br>ADES<br>TGSi<br>Ak | 95% | 72.7 | 53.21721 | Ref | 0.68  | -0.29 | 0.24  | -0.11 | 0.019 | -0.24 | 0.019 | 36700 | 55800 | 30800 | 50100 | 43400 | 41400 | 36100 | 42900 | 971.1 | 1940.1 | 2 | 0.014  | 7.218 |

|                                                                             |                                                                                                                                                                                                                                                                                                                            |                                          |     |      |          |     |        |       |       |        |       |       |       |       |       |       |       |        |       |       |        |       |        |   |        |       |
|-----------------------------------------------------------------------------|----------------------------------------------------------------------------------------------------------------------------------------------------------------------------------------------------------------------------------------------------------------------------------------------------------------------------|------------------------------------------|-----|------|----------|-----|--------|-------|-------|--------|-------|-------|-------|-------|-------|-------|-------|--------|-------|-------|--------|-------|--------|---|--------|-------|
| Fructose-<br>biphosphate<br>aldolase OS=Bos<br>taurus GN=ALDOA<br>PE=2 SV=1 | tr A6QLL8<br> A6QLL8_<br>BOVIN                                                                                                                                                                                                                                                                                             | iGEH<br>TPSS<br>LAIM<br>ENA<br>NVL<br>AR | 87% | 44.7 | 54.85664 | Ref | 0.57   | -0.09 | 0.4   | -0.17  | -0.4  | -0.08 | 0.17  | 718   | 1080  | 743   | 1180  | 872    | 650   | 847   | 999    | 809.8 | 2426.3 | 3 | 0.0062 | 2.538 |
| Fructose-<br>biphosphate<br>aldolase OS=Bos<br>taurus GN=ALDOA<br>PE=2 SV=1 | tr A6QLL8<br> A6QLL8_<br>BOVIN                                                                                                                                                                                                                                                                                             | pHQ<br>YPAL<br>TPEQ<br>k                 | 52% | 33.5 | 53.82739 | Ref | 0.31   | 0.017 | 0.17  | -0.16  | -0.04 | -0.05 | 0.1   | 6640  | 6940  | 6150  | 7650  | 6720   | 6390  | 6630  | 7310   | 673   | 2016.1 | 3 | 0.0174 | 8.625 |
| Fructose-<br>biphosphate<br>aldolase OS=Bos<br>taurus GN=ALDOA<br>PE=2 SV=1 | tr A6QLL8<br> A6QLL8_<br>BOVIN                                                                                                                                                                                                                                                                                             | ySHE<br>EIA<br>MAT<br>VTAL<br>R          | 86% | 43.5 | 54.47654 | Ref | 0.58   | -0.05 | 0.079 | -0.073 | -0.11 | -0.03 | -0.07 | 4570  | 6110  | 4280  | 5240  | 5200   | 4430  | 4890  | 4720   | 767.4 | 2299.2 | 3 | 0.0156 | 6.784 |
| Histone H4 OS=Sus<br>crofa PE=1 SV=2                                        | 2 H4_PIG<br>,sp P6280<br>3 H4_BO<br>VIN,sp P6<br>2804 H4_<br>RAT,sp P<br>62805 H4<br>_HUMAN,<br>sp P6280<br>6 H4_MO<br>USE,sp Q<br>4R362 H4<br>_MACFA,s<br>p Q5RCS7<br> H4_PON<br>AB,tr B2R<br>4R0 B2R4<br>RO_HUM<br>AN,tr B2R<br>TM0 B2R<br>TM0_MO<br>USE,tr D2<br>HWI2 D2<br>HWI2_AIL<br>ME,tr D2<br>HWI9 D2<br>HWI9_AIL | dAVT<br>YTEH<br>AK                       | 92% | 47.3 | 53.02532 | Ref | -0.089 | 0.73  | -0.51 | 0.53   | 0.84  | 0.5   | 0.87  | 93100 | 77100 | 1E+05 | 69900 | 159000 | 2E+05 | 1E+05 | 183000 | 581.6 | 1741.9 | 3 | 0.0182 | 10.47 |

|                                       |                                                                                                                                                                                                                                                                                                                            |                    |     |      |          |     |       |      |       |      |      |      |      |      |      |      |      |      |      |      |       |       |        |   |        |       |
|---------------------------------------|----------------------------------------------------------------------------------------------------------------------------------------------------------------------------------------------------------------------------------------------------------------------------------------------------------------------------|--------------------|-----|------|----------|-----|-------|------|-------|------|------|------|------|------|------|------|------|------|------|------|-------|-------|--------|---|--------|-------|
| Histone H4 OS=Sus<br>scrofa PE=1 SV=2 | 2 H4_PIG<br>,sp P6280<br>3 H4_BO<br>VIN,sp P6<br>2804 H4_<br>RAT,sp P<br>62805 H4<br>_HUMAN,<br>sp P6280<br>6 H4_MO<br>USE,sp Q<br>4R362 H4<br>_MACFA,s<br>p Q5RCS7<br> H4_PON<br>AB,tr B2R<br>4R0 B2R4<br>R0_HUM<br>AN,tr B2R<br>TM0 B2R<br>TM0_MO<br>USE,tr D2<br>HWI2 D2<br>HWI2_AIL<br>ME,tr D2<br>HWI9 D2<br>HWI9_AIL | dAVT<br>YTEH<br>AK | 95% | 55.8 | 53.02331 | Ref | 0.056 | 0.79 | -0.75 | 0.58 | 0.85 | 0.45 | 0.93 | 4570 | 4900 | 8810 | 3420 | 9440 | 9980 | 7870 | 10900 | 872   | 1741.9 | 2 | 0.018  | 10.36 |
| Histone H4 OS=Sus<br>scrofa PE=1 SV=2 | 2 H4_PIG<br>,sp P6280<br>3 H4_BO<br>VIN,sp P6<br>2804 H4_<br>RAT,sp P<br>62805 H4<br>_HUMAN,<br>sp P6280<br>6 H4_MO<br>USE,sp Q<br>4R362 H4<br>_MACFA,s<br>p Q5RCS7<br> H4_PON<br>AB,tr B2R<br>4R0 B2R4<br>R0_HUM<br>AN,tr B2R<br>TM0 B2R<br>TM0_MO<br>USE,tr D2<br>HWI2 D2<br>HWI2_AIL<br>ME,tr D2<br>HWI9 D2<br>HWI9_AIL | iSGLI<br>YEET<br>R | 77% | 37.3 | 52.2149  | Ref | 0.41  | 0.63 | 0.22  | 0.33 | 0.63 | 0.44 | 0.34 | 1810 | 1590 | 2010 | 1700 | 2020 | 2180 | 1990 | 1840  | 495.6 | 1483.8 | 3 | 0.0114 | 7.664 |

|                                       |                                                                                                                                                                                                                                                                                                                              |                           |     |      |          |     |       |      |                                           |      |      |      |      |      |      |      |                                          |      |      |      |      |       |        |   |        |       |
|---------------------------------------|------------------------------------------------------------------------------------------------------------------------------------------------------------------------------------------------------------------------------------------------------------------------------------------------------------------------------|---------------------------|-----|------|----------|-----|-------|------|-------------------------------------------|------|------|------|------|------|------|------|------------------------------------------|------|------|------|------|-------|--------|---|--------|-------|
| Histone H4 OS=Sus<br>scrofa PE=1 SV=2 | 2 H4_PIG<br>,sp P6280<br>3 H4_BO<br>VIN,sp P6<br>2804 H4_<br>RAT,sp P<br>62805 H4_<br>_HUMAN,<br>sp P6280<br>6 H4_MO<br>USE,sp Q<br>4R362 H4_<br>_MACFA,s<br>p Q5RCS7<br> H4_PON<br>AB,tr B2R<br>4R0 B2R4<br>R0_HUM<br>AN,tr B2R<br>TM0 B2R<br>TM0_MO<br>USE,tr D2<br>HWI2 D2<br>HWI2_AIL<br>ME,tr D2<br>HWI9 D2<br>HWI9_AIL | iSGLI<br>YEET<br>R        | 84% | 39.2 | 52.42638 | Ref | 0.34  | 0.61 | -0.12                                     | 0.43 | 0.68 | 0.5  | 0.74 | 1540 | 1650 | 2160 | 1460                                     | 2360 | 2460 | 2260 | 2640 | 742.9 | 1483.8 | 2 | 0.008  | 5.411 |
| Histone H4 OS=Sus<br>scrofa PE=1 SV=2 | 2 H4_PIG<br>,sp P6280<br>3 H4_BO<br>VIN,sp P6<br>2804 H4_<br>RAT,sp P<br>62805 H4_<br>_HUMAN,<br>sp P6280<br>6 H4_MO<br>USE,sp Q<br>4R362 H4_<br>_MACFA,s<br>p Q5RCS7<br> H4_PON<br>AB,tr B2R<br>4R0 B2R4<br>R0_HUM<br>AN,tr B2R<br>TM0 B2R<br>TM0_MO<br>USE,tr D2<br>HWI2 D2<br>HWI2_AIL<br>ME,tr D2<br>HWI9 D2<br>HWI9_AIL | kTVT<br>AMD<br>VYV<br>Alk | 79% | 35.2 | 51.30121 | Ref | 0.037 | 0.79 | Value<br>Missi<br>ng (-<br>0.516<br>7658) | 0.47 | 0.78 | 0.68 | 0.58 | 3410 | 2720 | 4970 | Value<br>Missing<br>(-<br>0.5167<br>658) | 4920 | 5340 | 5180 | 4820 | 588.6 | 2350.4 | 4 | 0.0294 | 12.51 |

|                                       |                                                                                                                                                                                                                                                                                                                            |                            |     |      |          |     |       |      |      |      |      |      |      |      |      |      |      |      |      |      |      |       |        |   |        |       |
|---------------------------------------|----------------------------------------------------------------------------------------------------------------------------------------------------------------------------------------------------------------------------------------------------------------------------------------------------------------------------|----------------------------|-----|------|----------|-----|-------|------|------|------|------|------|------|------|------|------|------|------|------|------|------|-------|--------|---|--------|-------|
| Histone H4 OS=Sus<br>scrofa PE=1 SV=2 | 2 H4_PIG<br>,sp P6280<br>3 H4_BO<br>VIN,sp P6<br>2804 H4_<br>RAT,sp P<br>62805 H4<br>_HUMAN,<br>sp P6280<br>6 H4_MO<br>USE,sp Q<br>4R362 H4<br>_MACFA,s<br>p Q5RCS7<br> H4_PON<br>AB,tr B2R<br>4R0 B2R4<br>R0_HUM<br>AN,tr B2R<br>TM0 B2R<br>TM0_MO<br>USE,tr D2<br>HWI2 D2<br>HWI2_AIL<br>ME,tr D2<br>HWI9 D2<br>HWI9_AIL | kTVT<br>AMD<br>VYV<br>ALkR | 95% | 48.2 | 50.58764 | Ref | -0.18 | 0.25 | -0.3 | 0.68 | 0.85 | 0.7  | 1.1  | 1850 | 2040 | 2970 | 2280 | 4970 | 4860 | 4590 | 6050 | 627.6 | 2506.5 | 4 | 0.0316 | 12.61 |
| Histone H4 OS=Sus<br>scrofa PE=1 SV=2 | 2 H4_PIG<br>,sp P6280<br>3 H4_BO<br>VIN,sp P6<br>2804 H4_<br>RAT,sp P<br>62805 H4<br>_HUMAN,<br>sp P6280<br>6 H4_MO<br>USE,sp Q<br>4R362 H4<br>_MACFA,s<br>p Q5RCS7<br> H4_PON<br>AB,tr B2R<br>4R0 B2R4<br>R0_HUM<br>AN,tr B2R<br>TM0 B2R<br>TM0_MO<br>USE,tr D2<br>HWI2 D2<br>HWI2_AIL<br>ME,tr D2<br>HWI9 D2<br>HWI9_AIL | tVTA<br>MDV<br>VYAL<br>k   | 88% | 43.8 | 52.93272 | Ref | 0.31  | 0.45 | 0.41 | 0.33 | 0.54 | 0.67 | 0.41 | 2970 | 2640 | 3170 | 3460 | 3600 | 3630 | 4170 | 3430 | 640.4 | 1918.1 | 3 | 0.0146 | 7.601 |

|                                       |                                                                                                                                                                                                                                                                                                                            |                     |   |     |      |          |     |      |      |       |      |      |      |      |     |     |     |     |     |     |     |     |       |        |   |        |       |
|---------------------------------------|----------------------------------------------------------------------------------------------------------------------------------------------------------------------------------------------------------------------------------------------------------------------------------------------------------------------------|---------------------|---|-----|------|----------|-----|------|------|-------|------|------|------|------|-----|-----|-----|-----|-----|-----|-----|-----|-------|--------|---|--------|-------|
| Histone H4 OS=Sus<br>scrofa PE=1 SV=2 | 2 H4_PIG<br>,sp P6280<br>3 H4_BO<br>VIN,sp P6<br>2804 H4_<br>RAT,sp P<br>62805 H4<br>_HUMAN,<br>sp P6280<br>6 H4_MO<br>USE,sp Q<br>4R362 H4<br>_MACFA,s<br>p Q5RCS7<br> H4_PON<br>AB,tr B2R<br>4R0 B2R4<br>R0_HUM<br>AN,tr B2R<br>TM0 B2R<br>TM0_MO<br>USE,tr D2<br>HWI2 D2<br>HWI2_AIL<br>ME,tr D2<br>HWI9 D2<br>HWI9_AIL | tVTA<br>MDV<br>VYAL | k | 95% | 54.7 | 53.09752 | Ref | 0.42 | 0.33 | -0.01 | 0.22 | 0.64 | 0.91 | 0.37 | 362 | 327 | 333 | 294 | 380 | 444 | 561 | 381 | 640.4 | 1918.1 | 3 | 0.0204 | 10.65 |
| Histone H4 OS=Sus<br>scrofa PE=1 SV=2 | 2 H4_PIG<br>,sp P6280<br>3 H4_BO<br>VIN,sp P6<br>2804 H4_<br>RAT,sp P<br>62805 H4<br>_HUMAN,<br>sp P6280<br>6 H4_MO<br>USE,sp Q<br>4R362 H4<br>_MACFA,s<br>p Q5RCS7<br> H4_PON<br>AB,tr B2R<br>4R0 B2R4<br>R0_HUM<br>AN,tr B2R<br>TM0 B2R<br>TM0_MO<br>USE,tr D2<br>HWI2 D2<br>HWI2_AIL<br>ME,tr D2<br>HWI9 D2<br>HWI9_AIL | tVTA<br>MDV<br>VYAL | k | 92% | 47.9 | 53.01772 | Ref | 0.5  | 0.7  | -0.21 | 0.37 | 0.69 | 0.25 | 0.81 | 419 | 508 | 632 | 379 | 624 | 681 | 523 | 767 | 640.4 | 1918.1 | 3 | 0.0164 | 8.555 |

|                                       |                                                                                                                                                                                                                                                                                                                            |                           |     |      |          |     |       |      |       |      |      |      |     |      |      |      |      |      |       |      |       |       |        |   |        |       |
|---------------------------------------|----------------------------------------------------------------------------------------------------------------------------------------------------------------------------------------------------------------------------------------------------------------------------------------------------------------------------|---------------------------|-----|------|----------|-----|-------|------|-------|------|------|------|-----|------|------|------|------|------|-------|------|-------|-------|--------|---|--------|-------|
| Histone H4 OS=Sus<br>scrofa PE=1 SV=2 | 2 H4_PIG<br>,sp P6280<br>3 H4_BO<br>VIN,sp P6<br>2804 H4_<br>RAT,sp P<br>62805 H4<br>_HUMAN,<br>sp P6280<br>6 H4_MO<br>USE,sp Q<br>4R362 H4<br>_MACFA,s<br>p Q5RCS7<br> H4_PON<br>AB,tr B2R<br>4R0 B2R4<br>RO_HUM<br>AN,tr B2R<br>TM0 B2R<br>TM0_MO<br>USE,tr D2<br>HWI2 D2<br>HWI2_AIL<br>ME,tr D2<br>HWI9 D2<br>HWI9_AIL | tVTA<br>MDV<br>VYAL<br>kR | 83% | 40.6 | 53.06654 | Ref | -0.39 | 0.43 | -0.58 | 0.64 | 0.91 | 0.61 | 1.3 | 3130 | 3510 | 6750 | 3760 | 9620 | 10100 | 8590 | 13700 | 692.4 | 2074.2 | 3 | 0.0234 | 11.25 |
| Histone H4 OS=Sus<br>scrofa PE=1 SV=2 | 2 H4_PIG<br>,sp P6280<br>3 H4_BO<br>VIN,sp P6<br>2804 H4_<br>RAT,sp P<br>62805 H4<br>_HUMAN,<br>sp P6280<br>6 H4_MO<br>USE,sp Q<br>4R362 H4<br>_MACFA,s<br>p Q5RCS7<br> H4_PON<br>AB,tr B2R<br>4R0 B2R4<br>RO_HUM<br>AN,tr B2R<br>TM0 B2R<br>TM0_MO<br>USE,tr D2<br>HWI2 D2<br>HWI2_AIL<br>ME,tr D2<br>HWI9 D2<br>HWI9_AIL | tVTA<br>MDV<br>VYAL<br>kR | 93% | 48   | 52.93141 | Ref | -0.4  | 0.28 | -0.66 | 0.69 | 0.97 | 0.59 | 1.4 | 2300 | 2810 | 4870 | 2850 | 8020 | 8520  | 6830 | 11500 | 692.4 | 2074.2 | 3 | 0.0186 | 8.968 |

|                                                                     |                                                                                                                                                                                                                                                                                                                            |                            |     |      |          |     |        |      |       |        |       |       |       |       |       |       |        |        |       |       |       |       |        |   |        |       |
|---------------------------------------------------------------------|----------------------------------------------------------------------------------------------------------------------------------------------------------------------------------------------------------------------------------------------------------------------------------------------------------------------------|----------------------------|-----|------|----------|-----|--------|------|-------|--------|-------|-------|-------|-------|-------|-------|--------|--------|-------|-------|-------|-------|--------|---|--------|-------|
| Histone H4 OS=Sus<br>scrofa PE=1 SV=2                               | 2 H4_PIG<br>,sp P6280<br>3 H4_BO<br>VIN,sp P6<br>2804 H4_<br>RAT,sp P<br>62805 H4<br>_HUMAN,<br>sp P6280<br>6 H4_MO<br>USE,sp Q<br>4R362 H4<br>_MACFA,s<br>p Q5RCS7<br> H4_PON<br>AB,tr B2R<br>4R0 B2R4<br>R0_HUM<br>AN,tr B2R<br>TM0 B2R<br>TM0_MO<br>USE,tr D2<br>HWI2 D2<br>HWI2_AIL<br>ME,tr D2<br>HWI9 D2<br>HWI9_AIL | vFLE<br>NVIR               | 71% | 33.5 | 50.07133 | Ref | 0.0087 | 0.72 | -0.26 | 0.32   | 0.77  | 0.29  | 1.2   | 1340  | 1370  | 2440  | 1380   | 2280   | 2720  | 2040  | 3740  | 431.9 | 1292.8 | 3 | 0.011  | 8.517 |
| Phosphoglycerate<br>mutase 1 OS=Bos<br>taurus GN=PGAM1<br>PE=2 SV=3 | sp Q3SZ6<br>2 PGAM1<br>_BOVIN,tr<br> D2H5L1 <br>D2H5L1_<br>AILME                                                                                                                                                                                                                                                           | aLPF<br>WNE<br>EIVP<br>QIk | 95% | 58.9 | 52.99357 | Ref | -0.2   | 0.53 | 0.068 | -0.11  | -0.11 | 0.088 | -0.1  | 1360  | 1030  | 1860  | 1510   | 1470   | 1280  | 1540  | 1340  | 764.8 | 2291.3 | 3 | 0.0148 | 6.467 |
| Phosphoglycerate<br>mutase 1 OS=Bos<br>taurus GN=PGAM1<br>PE=2 SV=3 | sp Q3SZ6<br>2 PGAM1<br>_BOVIN,tr<br> D2H5L1 <br>D2H5L1_<br>AILME                                                                                                                                                                                                                                                           | aME<br>AVA<br>AQG<br>k     | 77% | 37.8 | 52.50959 | Ref | -0.22  | 0.5  | 0.078 | 0.013  | -0.01 | 0.008 | -0.25 | 96700 | 70300 | 1E+05 | 105000 | 111000 | 95400 | 1E+05 | 83800 | 528.6 | 1582.9 | 3 | 0.0148 | 9.319 |
| Phosphoglycerate<br>mutase 1 OS=Bos<br>taurus GN=PGAM1<br>PE=2 SV=3 | sp Q3SZ6<br>2 PGAM1<br>_BOVIN,tr<br> D2H5L1 <br>D2H5L1_<br>AILME                                                                                                                                                                                                                                                           | aME<br>AVA<br>AQG<br>k     | 61% | 33.5 | 52.61698 | Ref | 0.024  | 0.23 | 0.1   | -0.005 | 0.062 | -0.02 | -0.18 | 13700 | 11700 | 14600 | 15000  | 15300  | 14000 | 13900 | 12300 | 792.5 | 1582.9 | 2 | 0.0102 | 6.455 |



|                                                            |                                              |                                    |     |      |          |     |       |       |       |        |       |       |       |       |       |       |       |       |       |       |       |       |        |   |        |       |
|------------------------------------------------------------|----------------------------------------------|------------------------------------|-----|------|----------|-----|-------|-------|-------|--------|-------|-------|-------|-------|-------|-------|-------|-------|-------|-------|-------|-------|--------|---|--------|-------|
| Phosphoglycerate mutase 1 OS=Bos taurus GN=PGAM1 PE=2 SV=3 | sp Q3SZ62 PGAM1_BOVIN,triD2H5L1 D2H5L1_AILME | dAGYEFDIcFTSVQk                    | 95% | 51.4 | 52.99588 | Ref | 0.33  | -0.1  | 0.23  | 0.045  | -0.19 | 0.19  | -0.33 | 441   | 480   | 387   | 546   | 530   | 393   | 534   | 371   | 793.1 | 2376.1 | 3 | 0.0124 | 5.237 |
| Phosphoglycerate mutase 1 OS=Bos taurus GN=PGAM1 PE=2 SV=3 | sp Q3SZ62 PGAM1_BOVIN,triD2H5L1 D2H5L1_AILME | dAGYEFDIcFTSVQk                    | 81% | 39.9 | 53.00909 | Ref | 0.27  | -0.14 | 0.045 | -0.065 | 0.15  | 0.065 | -0.1  | 234   | 240   | 197   | 251   | 256   | 260   | 255   | 226   | 793.1 | 2376.1 | 3 | 0.0113 | 4.77  |
| Phosphoglycerate mutase 1 OS=Bos taurus GN=PGAM1 PE=2 SV=3 | sp Q3SZ62 PGAM1_BOVIN,triD2H5L1 D2H5L1_AILME | hGES<br>TWN<br>LENR                | 84% | 39.3 | 51.11168 | Ref | 0.056 | 0.11  | -0.1  | -0.12  | -0.01 | 0.075 | 0.19  | 22500 | 19400 | 21800 | 21300 | 23000 | 21800 | 24100 | 25900 | 549.6 | 1645.8 | 3 | 0.0099 | 6.031 |
| Phosphoglycerate mutase 1 OS=Bos taurus GN=PGAM1 PE=2 SV=3 | sp Q3SZ62 PGAM1_BOVIN,triD2H5L1 D2H5L1_AILME | hYGLT<br>GLNk                      | 62% | 33.3 | 52.30944 | Ref | 0.19  | 0.15  | 0.37  | -0.77  | 0.16  | 0.29  | 0.11  | 4740  | 7070  | 7490  | 9770  | 4880  | 8130  | 9320  | 8140  | 834.5 | 1667   | 2 | 0.0068 | 4.085 |
| Phosphoglycerate mutase 1 OS=Bos taurus GN=PGAM1 PE=2 SV=3 | sp Q3SZ62 PGAM1_BOVIN,triD2H5L1 D2H5L1_AILME | kAMEAVAAQ<br>Gk                    | 53% | 29.4 | 51.41694 | Ref | 0.033 | 0.14  | -0.03 | -0.04  | -0.04 | 0.18  | 0.088 | 9820  | 9110  | 10700 | 10600 | 11600 | 10100 | 12400 | 11500 | 504.8 | 2015.2 | 4 | 0.0095 | 4.716 |
| Phosphoglycerate mutase 1 OS=Bos taurus GN=PGAM1 PE=2 SV=3 | sp Q3SZ62 PGAM1_BOVIN,triD2H5L1 D2H5L1_AILME | nLkPI<br>kPM<br>QFL<br>GDE<br>ETVR | 83% | 34.8 | 52.47801 | Ref | 0.011 | 0.045 | 0.14  | -0.15  | 0.019 | 0.02  | 0.22  | 6430  | 5770  | 6410  | 7690  | 6950  | 6800  | 7110  | 8080  | 606.4 | 3026.7 | 5 | 0.0175 | 5.794 |

|                                                                         |                                               |                           |     |      |          |     |       |       |       |       |       |       |       |       |       |       |       |       |       |       |       |       |        |   |        |       |
|-------------------------------------------------------------------------|-----------------------------------------------|---------------------------|-----|------|----------|-----|-------|-------|-------|-------|-------|-------|-------|-------|-------|-------|-------|-------|-------|-------|-------|-------|--------|---|--------|-------|
| Phosphoglycerate mutase 1 OS=Bos taurus GN=PGAM1 PE=2 SV=3              | sp Q3SZ62 PGAM1_BOVIN, tr D2H5L1 D2H5L1_AILME | vLIA AHG nSLR             | 87% | 41.3 | 51.53763 | Ref | 0.024 | 0.15  | 0.11  | -0.12 | -0.05 | 0.19  | 0.014 | 26400 | 24200 | 28600 | 31200 | 29500 | 27000 | 33200 | 29200 | 485.6 | 1453.9 | 3 | 0.0086 | 5.909 |
| Phosphoglycerate mutase 1 OS=Bos taurus GN=PGAM1 PE=2 SV=3              | sp Q3SZ62 PGAM1_BOVIN, tr D2H5L1 D2H5L1_AILME | vLIA AHG nSLR             | 95% | 66.9 | 51.91001 | Ref | 0.093 | 0.11  | 0.21  | -0.18 | -0.13 | 0.1   | 0.11  | 11100 | 10700 | 11700 | 14100 | 11900 | 10700 | 13200 | 13200 | 486   | 1454.8 | 3 | 0.01   | 6.901 |
| Phosphoglycerate mutase 1 OS=Bos taurus GN=PGAM1 PE=2 SV=3              | sp Q3SZ62 PGAM1_BOVIN, tr D2H5L1 D2H5L1_AILME | vLIA AHG nSLR             | 93% | 47.5 | 51.9483  | Ref | 0.16  | 0.17  | -0.09 | -0.2  | 0.013 | 0.061 | 0.005 | 4660  | 4110  | 4500  | 4210  | 4300  | 4350  | 4700  | 4490  | 486   | 1454.8 | 3 | 0.0097 | 6.653 |
| Uncharacterized protein (Fragment) OS=Bos taurus GN=Bt.104900 PE=3 SV=1 | tr F1MKS3 F1MKS3_BOVIN                        | aLAP TWE QLAL GLEH SETV k | 90% | 44.2 | 54.3908  | Ref | 0.53  | -0.58 | 0.37  | -0.33 | 0.17  | -0.46 | -0.07 | 1430  | 1740  | 875   | 1900  | 1290  | 1590  | 1070  | 1390  | 701.1 | 2800.5 | 4 | 0.0157 | 5.615 |
| Uncharacterized protein (Fragment) OS=Bos taurus GN=Bt.104900 PE=3 SV=1 | tr F1MKS3 F1MKS3_BOVIN                        | aLAP TWE QLAL GLEH SETV k | 95% | 68.3 | 54.29348 | Ref | 0.36  | -0.57 | 0.39  | -0.27 | 0.48  | -0.75 | 0.073 | 1150  | 1430  | 814   | 1780  | 1240  | 1810  | 812   | 1420  | 934.5 | 2800.5 | 3 | 0.0124 | 4.413 |

|                                                                                  |                                |                                          |     |      |          |     |      |       |      |       |      |       |       |       |       |       |       |       |       |       |       |       |        |   |        |       |
|----------------------------------------------------------------------------------|--------------------------------|------------------------------------------|-----|------|----------|-----|------|-------|------|-------|------|-------|-------|-------|-------|-------|-------|-------|-------|-------|-------|-------|--------|---|--------|-------|
| Uncharacterized protein (Fragment)<br>OS=Bos taurus<br>GN=Bt.104900 PE=3<br>SV=1 | tr F1MKS<br>3 F1MKS<br>3_BOVIN | aLAP<br>TWE<br>QLAL<br>GLEH<br>SETV<br>k | 82% | 39.2 | 54.29226 | Ref | 0.36 | -0.31 | 0.25 | -0.36 | 0.22 | -0.39 | 0.08  | 345   | 386   | 263   | 436   | 316   | 410   | 282   | 387   | 701.1 | 2800.5 | 4 | 0.0123 | 4.401 |
| Uncharacterized protein (Fragment)<br>OS=Bos taurus<br>GN=Bt.104900 PE=3<br>SV=1 | tr F1MKS<br>3 F1MKS<br>3_BOVIN | dLAP<br>TWE<br>DLSK                      | 70% | 36.7 | 53.54592 | Ref | 0.48 | -0.65 | 0.31 | -0.24 | 0.2  | -0.85 | 0.088 | 24300 | 25900 | 12800 | 27900 | 21100 | 25000 | 12600 | 23900 | 628.3 | 1882   | 3 | 0.0118 | 6.249 |
| Uncharacterized protein (Fragment)<br>OS=Bos taurus<br>GN=Bt.104900 PE=3<br>SV=1 | tr F1MKS<br>3 F1MKS<br>3_BOVIN | dLDS<br>LHR                              | 95% | 49.4 | 50.14138 | Ref | 0.35 | -0.38 | 0.43 | -0.37 | 0.46 | -0.74 | -0.03 | 12500 | 15200 | 9950  | 19500 | 12400 | 19100 | 8690  | 14100 | 387.2 | 1158.6 | 3 | 0.0094 | 8.102 |
| Uncharacterized protein (Fragment)<br>OS=Bos taurus<br>GN=Bt.104900 PE=3<br>SV=1 | tr F1MKS<br>3 F1MKS<br>3_BOVIN | gYPT<br>LLLF<br>R                        | 85% | 40.2 | 51.82072 | Ref | 0.44 | -0.5  | 0.19 | -0.28 | 0.49 | -1    | 0.18  | 5520  | 6660  | 3780  | 6840  | 5440  | 8100  | 2980  | 6770  | 461.9 | 1382.8 | 3 | 0.0069 | 4.963 |
| Uncharacterized protein (Fragment)<br>OS=Bos taurus<br>GN=Bt.104900 PE=3<br>SV=1 | tr F1MKS<br>3 F1MKS<br>3_BOVIN | gYPT<br>LLW<br>FR                        | 95% | 52.4 | 52.27555 | Ref | 0.21 | -0.55 | 0.35 | -0.16 | 0.36 | -0.52 | 0.063 | 1930  | 1930  | 1240  | 2590  | 2000  | 2510  | 1430  | 2120  | 486.3 | 1455.8 | 3 | 0.011  | 7.547 |

|                                                                                  |                                |                                  |     |      |          |     |       |       |       |        |       |       |       |      |      |      |      |      |      |       |      |       |        |   |        |       |
|----------------------------------------------------------------------------------|--------------------------------|----------------------------------|-----|------|----------|-----|-------|-------|-------|--------|-------|-------|-------|------|------|------|------|------|------|-------|------|-------|--------|---|--------|-------|
| Uncharacterized protein (Fragment)<br>OS=Bos taurus<br>GN=Bt.104900 PE=3<br>SV=1 | tr F1MKS<br>3 F1MKS<br>3_BOVIN | gYPT<br>LLW<br>FR                | 84% | 40.1 | 52.26749 | Ref | 0.059 | -0.14 | 0.03  | -0.11  | 0.28  | -0.32 | 0.11  | 1520 | 1320 | 1250 | 1580 | 1580 | 1810 | 1240  | 1670 | 486.3 | 1455.8 | 3 | 0.0092 | 6.291 |
| Uncharacterized protein (Fragment)<br>OS=Bos taurus<br>GN=Bt.104900 PE=3<br>SV=1 | tr F1MKS<br>3 F1MKS<br>3_BOVIN | vDcT<br>ADSE<br>VcSA<br>QGV<br>R | 88% | 33.8 | 45.05354 | Ref | 0.44  | -0.74 | 0.29  | -0.22  | 0.62  | -1    | 0.14  | 5280 | 7210 | 3480 | 7930 | 6160 | 9610 | 3240  | 7160 | 1018  | 2034.9 | 2 | 0.0183 | 8.981 |
| Uncharacterized protein (Fragment)<br>OS=Bos taurus<br>GN=Bt.104900 PE=3<br>SV=1 | tr F1MKS<br>3 F1MKS<br>3_BOVIN | vDcT<br>ADSE<br>VcSA<br>QGV<br>R | 94% | 42.3 | 45.23915 | Ref | 0.028 | -0.23 | 0.084 | -0.12  | 0.006 | 0.18  | -0.03 | 8990 | 7480 | 6790 | 9470 | 9040 | 8630 | 10100 | 8750 | 679.3 | 2034.9 | 3 | 0.0153 | 7.525 |
| Uncharacterized protein (Fragment)<br>OS=Bos taurus<br>GN=Bt.104900 PE=3<br>SV=1 | tr F1MKS<br>3 F1MKS<br>3_BOVIN | vDcT<br>ADSE<br>VcSA<br>QGV<br>R | 95% | 64.6 | 45.62043 | Ref | 0.44  | -0.5  | 0.28  | -0.26  | 0.37  | -1.1  | 0.18  | 4200 | 4780 | 2700 | 5210 | 3940 | 5320 | 1960  | 4840 | 1018  | 2034.9 | 2 | 0.0095 | 4.668 |
| Uncharacterized protein (Fragment)<br>OS=Bos taurus<br>GN=Bt.104900 PE=3<br>SV=1 | tr F1MKS<br>3 F1MKS<br>3_BOVIN | vDcT<br>QHY<br>ELcS<br>GNQ<br>VR | 62% | 28.8 | 47.25103 | Ref | 0.078 | -0.21 | 0.092 | -0.059 | 0.21  | -0.23 | 0.17  | 4110 | 3950 | 3500 | 4860 | 4820 | 5080 | 3910  | 5100 | 750   | 2247   | 3 | 0.0146 | 6.505 |

|                                                                           |                                                                                                                                                                                                                                                                                                                              |                            |      |     |      |          |     |       |      |       |       |       |      |       |       |       |       |       |       |       |       |       |       |        |   |        |       |
|---------------------------------------------------------------------------|------------------------------------------------------------------------------------------------------------------------------------------------------------------------------------------------------------------------------------------------------------------------------------------------------------------------------|----------------------------|------|-----|------|----------|-----|-------|------|-------|-------|-------|------|-------|-------|-------|-------|-------|-------|-------|-------|-------|-------|--------|---|--------|-------|
| Glyceraldehyde-3-phosphate dehydrogenase OS=Sus scrofa GN=GAPDH PE=1 SV=4 | 5 G3P_PI<br>G,sp P10<br>096 G3P_<br>BOVIN,sp<br> P46406 <br>G3P_RABI<br>T,sp Q28<br>554 G3P_<br>SHEEP,sp <br>Q4KYY3 <br>G3P_SPEC<br>I,tr A0SN<br>U7 A0SN<br>U7_PIG,tr<br> A9YF36 <br>A9YF36_B<br>OSMU,tr <br>D2HMP6 <br>D2HMP6_<br>AILME,tr <br>D2HNX7 <br>D2HNX7_<br>AILME,tr <br>D6BQW4 <br>D6BQW4<br>_AILME,tr<br> D7R7V6 | gAA<br>QNII<br>PAST<br>GAA | k    | 95% | 57   | 52.54908 | Ref | 0.026 | 0.36 | 0.1   | 0.068 | -0.46 | 0.57 | -0.23 | 11800 | 10600 | 14500 | 13600 | 14600 | 8830  | 18800 | 10700 | 989.6 | 1977.1 | 2 | 0.0155 | 7.823 |
| Glyceraldehyde-3-phosphate dehydrogenase OS=Sus scrofa GN=GAPDH PE=1 SV=4 | 5 G3P_PI<br>G,sp P10<br>096 G3P_<br>BOVIN,sp<br> P46406 <br>G3P_RABI<br>T,sp Q28<br>554 G3P_<br>SHEEP,sp <br>Q4KYY3 <br>G3P_SPEC<br>I,tr A0SN<br>U7 A0SN<br>U7_PIG,tr<br> A9YF36 <br>A9YF36_B<br>OSMU,tr <br>D2HMP6 <br>D2HMP6_<br>AILME,tr <br>D2HNX7 <br>D2HNX7_<br>AILME,tr <br>D6BQW4 <br>D6BQW4<br>_AILME,tr<br> D7R7V6 | qASE                       | GPLK | 80% | 36.6 | 51.17454 | Ref | 0.058 | 0.38 | -0.01 | 0.011 | -0.17 | 0.47 | -0.21 | 59700 | 54500 | 73800 | 63200 | 70800 | 54500 | 88900 | 55100 | 719.4 | 1436.8 | 2 | 0.0076 | 5.253 |

|                                                                           |                                                                                                                                                                                                                           |                   |     |      |          |     |       |      |       |        |       |      |       |       |       |       |       |       |       |       |       |       |        |   |        |       |
|---------------------------------------------------------------------------|---------------------------------------------------------------------------------------------------------------------------------------------------------------------------------------------------------------------------|-------------------|-----|------|----------|-----|-------|------|-------|--------|-------|------|-------|-------|-------|-------|-------|-------|-------|-------|-------|-------|--------|---|--------|-------|
| Glyceraldehyde-3-phosphate dehydrogenase OS=Sus scrofa GN=GAPDH PE=1 SV=4 | 5 G3P_P1G,sp P10096 G3P_BOVIN,sp P46406 G3P_RABI T,sp Q28554 G3P_SHEEP,sp Q4KYY3 G3P_SPEC I,tr A0SN U7 A0SN U7_PIG,tr A9YF36 A9YF36_B OSMU,tr D2HMP6 D2HMP6_AILME,tr D2HMX7 D2HMX7_AILME,tr D6BQW4 D6BQW4_AILME,tr D7R7V6 | vPEL nGk          | 75% | 33.5 | 49.66883 | Ref | 0.087 | 0.34 | -0.09 | 0.11   | -0.19 | 0.35 | -0.13 | 13400 | 11500 | 14900 | 12400 | 15800 | 11100 | 16900 | 12100 | 740   | 1477.9 | 2 | 0.0039 | 2.631 |
| Glyceraldehyde-3-phosphate dehydrogenase OS=Sus scrofa GN=GAPDH PE=1 SV=4 | 5 G3P_P1G,sp P10096 G3P_BOVIN,sp P46406 G3P_RABI T,sp Q28554 G3P_SHEEP,sp Q4KYY3 G3P_SPEC I,tr A0SN U7 A0SN U7_PIG,tr A9YF36 A9YF36_B OSMU,tr D2HMP6 D2HMP6_AILME,tr D2HMX7 D2HMX7_AILME,tr D6BQW4 D6BQW4_AILME,tr D7R7V6 | vPTP NVS VVD LTcR | 95% | 67.6 | 53.46018 | Ref | 0.13  | 0.36 | -0.01 | -0.029 | -0.25 | 0.5  | -0.13 | 6660  | 6590  | 8380  | 7280  | 7920  | 5930  | 10400 | 6680  | 925.5 | 1849   | 2 | 0.0016 | 0.849 |

|                                                                           |                                                                                                                                                                                                                             |                    |     |      |          |     |      |      |       |       |       |      |       |      |      |      |      |      |      |      |      |       |      |   |        |       |
|---------------------------------------------------------------------------|-----------------------------------------------------------------------------------------------------------------------------------------------------------------------------------------------------------------------------|--------------------|-----|------|----------|-----|------|------|-------|-------|-------|------|-------|------|------|------|------|------|------|------|------|-------|------|---|--------|-------|
| Glyceraldehyde-3-phosphate dehydrogenase OS=Sus scrofa GN=GAPDH PE=1 SV=4 | 5 G3P_P1G,sp P10096 G3P_BOVIN,sp P46406 G3P_RABI T,sp Q28554 G3P_SHEEP,sp Q4KYY3 G3P_SPEC I,tr A0SN U7 A0SN U7_PIG,tr A9YF36 A9YF36_B OSMU,tr D2HMP6 D2HMP6_AILME,tr D2HMX7 D2HMX7_AILME,tr D6BQW4 D6BQW4_AILME,tr D7R7V6 k | VVDL<br>MVH<br>MAS | 66% | 35.3 | 53.02762 | Ref | 0.18 | 0.38 | 0.027 | -0.25 | -0.23 | 0.32 | -0.38 | 1870 | 1400 | 1740 | 1530 | 1390 | 1240 | 1880 | 1160 | 613.3 | 1837 | 3 | 0.0177 | 9.626 |
| Glyceraldehyde-3-phosphate dehydrogenase OS=Sus scrofa GN=GAPDH PE=1 SV=4 | 5 G3P_P1G,sp P10096 G3P_BOVIN,sp P46406 G3P_RABI T,sp Q28554 G3P_SHEEP,sp Q4KYY3 G3P_SPEC I,tr A0SN U7 A0SN U7_PIG,tr A9YF36 A9YF36_B OSMU,tr D2HMP6 D2HMP6_AILME,tr D2HMX7 D2HMX7_AILME,tr D6BQW4 D6BQW4_AILME,tr D7R7V6 k | VVDL<br>MVH<br>MAS | 85% | 41.4 | 52.91935 | Ref | 0.2  | 0.23 | 0.03  | 0.034 | -0.18 | 0.21 | -0.24 | 940  | 769  | 855  | 832  | 920  | 691  | 949  | 690  | 613.4 | 1837 | 3 | 0.0058 | 3.147 |

|                                                                           |                                                                                                                                                                                                                              |                    |     |      |          |     |        |      |       |       |       |      |       |      |      |      |      |      |      |      |      |       |        |   |        |       |
|---------------------------------------------------------------------------|------------------------------------------------------------------------------------------------------------------------------------------------------------------------------------------------------------------------------|--------------------|-----|------|----------|-----|--------|------|-------|-------|-------|------|-------|------|------|------|------|------|------|------|------|-------|--------|---|--------|-------|
| Glyceraldehyde-3-phosphate dehydrogenase OS=Sus scrofa GN=GAPDH PE=1 SV=4 | 5 G3P_P1G,sp P10096 G3P_BOVIN,sp P46406 G3P_RABI T,sp Q28554 G3P_SHEEP,sp Q4KYY3 G3P_SPEC I,tr A0SN U7 A0SN U7_PIG,tr A9YF36 A9YF36_B OSMU,tr D2HMP6 D2HMP6_AILME,tr D2HMX7 D2HMX7_AILME,tr D6BQW4 D6BQW4_AILME,tr D7R7V6 k  | VVDL<br>MVH<br>MAS | 70% | 36.6 | 53.4181  | Ref | 0.2    | 0.27 | 0.1   | 0.051 | -0.16 | 0.24 | -0.39 | 521  | 443  | 504  | 505  | 536  | 406  | 556  | 357  | 613.3 | 1837   | 3 | 0.0437 | 23.78 |
| Glyceraldehyde-3-phosphate dehydrogenase OS=Sus scrofa GN=GAPDH PE=1 SV=4 | 5 G3P_P1G,sp P10096 G3P_BOVIN,sp P46406 G3P_RABI T,sp Q28554 G3P_SHEEP,sp Q4KYY3 G3P_SPEC I,tr A0SN U7 A0SN U7_PIG,tr A9YF36 A9YF36_B OSMU,tr D2HMP6 D2HMP6_AILME,tr D2HMX7 D2HMX7_AILME,tr D6BQW4 D6BQW4_AILME,tr D7R7V6 kE | VVDL<br>MVH<br>MAS | 81% | 40.1 | 53.60285 | Ref | -0.048 | 0.19 | 0.065 | 0.098 | -0.11 | 0.44 | -0    | 1400 | 1210 | 1550 | 1590 | 1790 | 1350 | 2080 | 1520 | 656.4 | 1966.1 | 3 | 0.009  | 4.589 |



|                                                                           |                                                                                                                                                                                                                           |                          |     |      |          |     |        |      |       |      |       |      |       |      |      |      |      |      |      |       |      |       |        |   |        |       |
|---------------------------------------------------------------------------|---------------------------------------------------------------------------------------------------------------------------------------------------------------------------------------------------------------------------|--------------------------|-----|------|----------|-----|--------|------|-------|------|-------|------|-------|------|------|------|------|------|------|-------|------|-------|--------|---|--------|-------|
| Glyceraldehyde-3-phosphate dehydrogenase OS=Sus scrofa GN=GAPDH PE=1 SV=4 | 5 G3P_P1G,sp P10096 G3P_BOVIN,sp P46406 G3P_RABI T,sp Q28554 G3P_SHEEP,sp Q4KYY3 G3P_SPEC I,tr A0SN U7 A0SN U7_PIG,tr A9YF36 A9YF36_B OSMU,tr D2HMP6 D2HMP6_AILME,tr D2HMX7 D2HMX7_AILME,tr D6BQW4 D6BQW4_AILME,tr D7R7V6 | VVDL<br>MVH<br>MAS<br>kE | 67% | 36.1 | 53.67833 | Ref | -0.065 | 0.43 | -0.17 | 0.13 | -0.04 | 0.43 | -0.11 | 7070 | 6200 | 9460 | 7040 | 9520 | 7380 | 10700 | 7320 | 656.4 | 1966.1 | 3 | 0.0204 | 10.35 |
| Glyceraldehyde-3-phosphate dehydrogenase OS=Sus scrofa GN=GAPDH PE=1 SV=4 | 5 G3P_P1G,sp P10096 G3P_BOVIN,sp P46406 G3P_RABI T,sp Q28554 G3P_SHEEP,sp Q4KYY3 G3P_SPEC I,tr A0SN U7 A0SN U7_PIG,tr A9YF36 A9YF36_B OSMU,tr D2HMP6 D2HMP6_AILME,tr D2HMX7 D2HMX7_AILME,tr D6BQW4 D6BQW4_AILME,tr D7R7V6 | VVDL<br>MVH<br>MAS<br>kE | 81% | 40.5 | 53.6888  | Ref | -0.15  | 0.33 | 0.04  | 0.11 | -0.09 | 0.41 | -0.18 | 1860 | 1380 | 2080 | 1910 | 2210 | 1670 | 2490  | 1630 | 656.4 | 1966.1 | 3 | 0.0127 | 6.449 |

|                                                                           |                                                                                                                                                                                                                           |                          |     |      |          |     |       |      |       |       |       |      |       |      |      |      |      |      |      |      |      |       |        |   |        |       |
|---------------------------------------------------------------------------|---------------------------------------------------------------------------------------------------------------------------------------------------------------------------------------------------------------------------|--------------------------|-----|------|----------|-----|-------|------|-------|-------|-------|------|-------|------|------|------|------|------|------|------|------|-------|--------|---|--------|-------|
| Glyceraldehyde-3-phosphate dehydrogenase OS=Sus scrofa GN=GAPDH PE=1 SV=4 | 5 G3P_P1G,sp P10096 G3P_BOVIN,sp P46406 G3P_RABI T,sp Q28554 G3P_SHEEP,sp Q4KYY3 G3P_SPEC I,tr A0SN U7 A0SN U7_PIG,tr A9YF36 A9YF36_B OSMU,tr D2HMP6 D2HMP6_AILME,tr D2HMX7 D2HMX7_AILME,tr D6BQW4 D6BQW4_AILME,tr D7R7V6 | VVDL<br>MVH<br>MAS<br>kE | 69% | 36.8 | 53.70058 | Ref | 0.056 | 0.3  | -0    | 0.039 | -0.13 | 0.35 | 0.011 | 1220 | 1110 | 1430 | 1300 | 1480 | 1150 | 1670 | 1310 | 656.4 | 1966.1 | 3 | 0.0116 | 5.885 |
| Glyceraldehyde-3-phosphate dehydrogenase OS=Sus scrofa GN=GAPDH PE=1 SV=4 | 5 G3P_P1G,sp P10096 G3P_BOVIN,sp P46406 G3P_RABI T,sp Q28554 G3P_SHEEP,sp Q4KYY3 G3P_SPEC I,tr A0SN U7 A0SN U7_PIG,tr A9YF36 A9YF36_B OSMU,tr D2HMP6 D2HMP6_AILME,tr D2HMX7 D2HMX7_AILME,tr D6BQW4 D6BQW4_AILME,tr D7R7V6 | VVDL<br>MVH<br>MAS<br>kE | 71% | 37.2 | 53.60412 | Ref | -0.22 | 0.23 | -0.02 | 0.16  | 0.019 | 0.31 | 0.11  | 531  | 393  | 584  | 548  | 687  | 544  | 695  | 601  | 656.4 | 1966.1 | 3 | 0.0087 | 4.406 |

|                                                               |                        |               |    |     |      |          |     |        |       |       |        |       |       |       |       |       |       |       |       |       |       |       |       |        |   |        |       |
|---------------------------------------------------------------|------------------------|---------------|----|-----|------|----------|-----|--------|-------|-------|--------|-------|-------|-------|-------|-------|-------|-------|-------|-------|-------|-------|-------|--------|---|--------|-------|
| Uncharacterized protein OS=Macaca mulatta GN=LRRC59 PE=4 SV=1 | tr F7HBZ3 F7HBZ3_MACMU | aTIL DLSc     | Nk | 83% | 40.8 | 53.27843 | Ref | -0.012 | 0.049 | 0.035 | -0.1   | 0.11  | -0.16 | -0.01 | 12200 | 10700 | 12200 | 13500 | 13600 | 13700 | 11900 | 13100 | 578   | 1730.9 | 3 | 0.0145 | 8.383 |
| Uncharacterized protein OS=Macaca mulatta GN=LRRC59 PE=4 SV=1 | tr F7HBZ3 F7HBZ3_MACMU | dNPL DPVL     | Ak | 95% | 60.9 | 52.10712 | Ref | -0.032 | 0.03  | 0.045 | -0.038 | 0.15  | -0.25 | -0.19 | 15200 | 11800 | 13300 | 15100 | 15700 | 15600 | 12400 | 12800 | 845.5 | 1689   | 2 | 0.0134 | 7.926 |
| Uncharacterized protein OS=Macaca mulatta GN=LRRC59 PE=4 SV=1 | tr F7HBZ3 F7HBZ3_MACMU | IVNL QHL DLLN | NR | 65% | 34.8 | 52.67181 | Ref | 0.089  | -0.22 | 0.17  | -0.13  | 0.067 | -0.28 | -0.26 | 3430  | 2510  | 2200  | 3230  | 2890  | 2890  | 2370  | 2380  | 622.7 | 1865.1 | 3 | 0.0026 | 1.405 |
| Uncharacterized protein OS=Macaca mulatta GN=LRRC59 PE=4 SV=1 | tr F7HBZ3 F7HBZ3_MACMU | IVNL QHL DLLN | NR | 84% | 41   | 52.77618 | Ref | -0.082 | 0.094 | 0.16  | -0.019 | -0.1  | -0.3  | -0.02 | 2370  | 1800  | 2200  | 2590  | 2520  | 2080  | 1900  | 2280  | 622.7 | 1865.1 | 3 | 0.0061 | 3.27  |
| Uncharacterized protein OS=Macaca mulatta GN=LRRC59 PE=4 SV=1 | tr F7HBZ3 F7HBZ3_MACMU | IVNL QHL DLLN | NR | 89% | 43.6 | 52.71219 | Ref | 0.13   | -0.27 | -0.01 | -0.18  | 0.15  | -0.06 | 0.056 | 3390  | 3120  | 2570  | 3440  | 3370  | 3710  | 3340  | 3610  | 622.7 | 1865.1 | 3 | 0.0085 | 4.54  |
| Uncharacterized protein OS=Macaca mulatta GN=LRRC59 PE=4 SV=1 | tr F7HBZ3 F7HBZ3_MACMU | IVNL QHL DLLN | NR | 86% | 41.7 | 52.60691 | Ref | -0.003 | -0.04 | 0.031 | 0.008  | -0.17 | -0.01 | 0.085 | 1600  | 1400  | 1480  | 1750  | 1900  | 1470  | 1710  | 1810  | 622.7 | 1865.1 | 3 | 0.0065 | 3.463 |

|                                                               |                        |               |      |     |      |          |     |        |       |       |        |       |       |       |      |      |      |      |      |      |      |      |       |        |   |        |       |
|---------------------------------------------------------------|------------------------|---------------|------|-----|------|----------|-----|--------|-------|-------|--------|-------|-------|-------|------|------|------|------|------|------|------|------|-------|--------|---|--------|-------|
| Uncharacterized protein OS=Macaca mulatta GN=LRRC59 PE=4 SV=1 | tr F7HBZ3 F7HBZ3_MACMU | IVNL QHL DLLN | NR   | 93% | 48   | 52.70886 | Ref | 0.054  | -0.11 | 0.079 | 0.005  | 0.021 | -0.09 | -0.01 | 823  | 775  | 752  | 961  | 1010 | 888  | 858  | 903  | 622.7 | 1865.1 | 3 | 0.0088 | 4.733 |
| Uncharacterized protein OS=Macaca mulatta GN=LRRC59 PE=4 SV=1 | tr F7HBZ3 F7HBZ3_MACMU | IVNL QHL DLLN | NR   | 83% | 40.2 | 52.71219 | Ref | -0.19  | 0.17  | -0.13 | 0.067  | -0.14 | 0.067 | 0.003 | 227  | 171  | 238  | 216  | 274  | 207  | 250  | 237  | 622.7 | 1865.1 | 3 | 0.0085 | 4.54  |
| Uncharacterized protein OS=Macaca mulatta GN=LRRC59 PE=4 SV=1 | tr F7HBZ3 F7HBZ3_MACMU | IVNL QHL DLLn | NR   | 93% | 49.4 | 53.07117 | Ref | -0.13  | 0.035 | 0.064 | -0.059 | 0.17  | -0.13 | -0.05 | 1090 | 876  | 1070 | 1220 | 1240 | 1270 | 1070 | 1130 | 623   | 1866.1 | 3 | 0.0114 | 6.101 |
| Uncharacterized protein OS=Macaca mulatta GN=LRRC59 PE=4 SV=1 | tr F7HBZ3 F7HBZ3_MACMU | IVNL QHL DLLn | NR   | 95% | 54.3 | 52.86014 | Ref | -0.42  | 0.1   | -0.09 | 0.13   | -0.06 | -0.23 | 0.051 | 305  | 162  | 252  | 249  | 319  | 244  | 226  | 273  | 623   | 1866.1 | 3 | 0.0067 | 3.562 |
| Uncharacterized protein OS=Macaca mulatta GN=LRRC59 PE=4 SV=1 | tr F7HBZ3 F7HBZ3_MACMU | IVTL PVSF     | AQLK | 95% | 49.9 | 48.24432 | Ref | -0.049 | -0.08 | -0.05 | -0.059 | 0.22  | -0.3  | 0.2   | 4230 | 3650 | 3860 | 4440 | 4860 | 5130 | 3770 | 5260 | 642.1 | 1923.2 | 3 | 0.0189 | 9.824 |
| Uncharacterized protein OS=Macaca mulatta GN=LRRC59 PE=4 SV=1 | tr F7HBZ3 F7HBZ3_MACMU | IVTL PVSF     | AQLK | 57% | 28.8 | 48.38364 | Ref | -0.059 | -0.1  | 0.082 | 0.02   | 0.23  | -0.19 | -0.02 | 417  | 372  | 391  | 499  | 527  | 531  | 414  | 463  | 642.1 | 1923.2 | 3 | 0.0198 | 10.31 |

|                                                                                                                                           |                                |                           |     |      |          |     |      |       |      |       |      |       |      |       |       |      |       |       |       |       |       |       |        |   |        |       |
|-------------------------------------------------------------------------------------------------------------------------------------------|--------------------------------|---------------------------|-----|------|----------|-----|------|-------|------|-------|------|-------|------|-------|-------|------|-------|-------|-------|-------|-------|-------|--------|---|--------|-------|
| cDNA FLJ53704,<br>moderately similar<br>to Nascent<br>polypeptide-<br>associated complex<br>subunit alpha<br>OS=Homo sapiens<br>PE=2 SV=1 | tr B4DDI8<br> B4DDI8_<br>HUMAN | dIEL<br>VMS<br>QAN<br>VSR | 60% | 33.9 | 53.09988 | Ref | 0.11 | 0.29  | 0.48 | 0.19  | 0.36 | -0.12 | 0.57 | 3760  | 3540  | 4350 | 5570  | 5030  | 4940  | 3680  | 5930  | 883.5 | 1764.9 | 2 | 0.0138 | 7.801 |
| cDNA FLJ53704,<br>moderately similar<br>to Nascent<br>polypeptide-<br>associated complex<br>subunit alpha<br>OS=Homo sapiens<br>PE=2 SV=1 | tr B4DDI8<br> B4DDI8_<br>HUMAN | dIEL<br>VMS<br>QAN<br>VSR | 86% | 42.2 | 53.19527 | Ref | 0.19 | -0.07 | 0.18 | 0.054 | 0.32 | 0.024 | 0.44 | 17600 | 10700 | 9650 | 12900 | 13000 | 13700 | 11700 | 15400 | 589.3 | 1764.9 | 3 | 0.0103 | 5.834 |

|                                                                                                                                           |                                |                                 |     |      |          |     |        |      |      |      |      |       |      |      |      |      |       |       |       |      |       |       |        |   |        |       |
|-------------------------------------------------------------------------------------------------------------------------------------------|--------------------------------|---------------------------------|-----|------|----------|-----|--------|------|------|------|------|-------|------|------|------|------|-------|-------|-------|------|-------|-------|--------|---|--------|-------|
| cDNA FLJ53704,<br>moderately similar<br>to Nascent<br>polypeptide-<br>associated complex<br>subunit alpha<br>OS=Homo sapiens<br>PE=2 SV=1 | tr B4DDI8<br> B4DDI8_<br>HUMAN | iEDL<br>SQQ<br>AQL<br>AAA<br>Ek | 95% | 64.7 | 54.13028 | Ref | 0.2    | 0.22 | 0.11 | 0.27 | 0.28 | 0.28  | 0.47 | 2730 | 2430 | 2690 | 2790  | 3440  | 3020  | 3150 | 3570  | 741.7 | 2222.2 | 3 | 0.0188 | 8.455 |
| cDNA FLJ53704,<br>moderately similar<br>to Nascent<br>polypeptide-<br>associated complex<br>subunit alpha<br>OS=Homo sapiens<br>PE=2 SV=1 | tr B4DDI8<br> B4DDI8_<br>HUMAN | iEDL<br>SQQ<br>AQL<br>AAA<br>Ek | 94% | 48.4 | 54.11765 | Ref | -0.026 | 0.27 | 0.29 | 0.12 | 0.51 | -0.19 | 0.75 | 8860 | 7270 | 9670 | 11000 | 10800 | 12300 | 7930 | 15200 | 556.6 | 2222.2 | 4 | 0.018  | 8.075 |

|                                                                                                                                           |                                |                                 |     |      |          |     |       |      |      |      |      |       |      |       |       |       |       |       |       |       |       |       |        |   |        |       |
|-------------------------------------------------------------------------------------------------------------------------------------------|--------------------------------|---------------------------------|-----|------|----------|-----|-------|------|------|------|------|-------|------|-------|-------|-------|-------|-------|-------|-------|-------|-------|--------|---|--------|-------|
| cDNA FLJ53704,<br>moderately similar<br>to Nascent<br>polypeptide-<br>associated complex<br>subunit alpha<br>OS=Homo sapiens<br>PE=2 SV=1 | tr B4DDI8<br> B4DDI8_<br>HUMAN | iEDL<br>SQQ<br>AQL<br>AAA<br>Ek | 95% | 69.4 | 54.12163 | Ref | 0.022 | 0.11 | 0.46 | 0.19 | 0.49 | -0.08 | 0.68 | 18600 | 17400 | 20000 | 28700 | 26300 | 28200 | 19900 | 33400 | 741.7 | 2222.2 | 3 | 0.0177 | 7.955 |
| cDNA FLJ53704,<br>moderately similar<br>to Nascent<br>polypeptide-<br>associated complex<br>subunit alpha<br>OS=Homo sapiens<br>PE=2 SV=1 | tr B4DDI8<br> B4DDI8_<br>HUMAN | iEDL<br>SQQ<br>AQL<br>AAA<br>Ek | 95% | 59.9 | 53.8679  | Ref | -0.14 | 0.28 | 0.46 | 0.12 | 0.42 | 0.1   | 0.65 | 4230  | 3470  | 5050  | 6430  | 5600  | 5990  | 5030  | 7310  | 741.8 | 2222.2 | 3 | 0.0058 | 2.598 |

|                                                                                                                                           |                                |                                   |     |      |          |     |       |      |      |      |      |       |      |      |      |      |      |      |      |      |      |       |        |   |        |       |
|-------------------------------------------------------------------------------------------------------------------------------------------|--------------------------------|-----------------------------------|-----|------|----------|-----|-------|------|------|------|------|-------|------|------|------|------|------|------|------|------|------|-------|--------|---|--------|-------|
| cDNA FLJ53704,<br>moderately similar<br>to Nascent<br>polypeptide-<br>associated complex<br>subunit alpha<br>OS=Homo sapiens<br>PE=2 SV=1 | tr B4DDI8<br> B4DDI8_<br>HUMAN | iEDL<br>SQQ<br>AQL<br>AAA<br>Ek   | 95% | 62   | 53.92561 | Ref | 0.28  | 0.33 | 0.3  | 0.14 | 0.25 | 0.31  | 0.32 | 2480 | 2530 | 2830 | 3110 | 3070 | 2890 | 3150 | 3160 | 741.7 | 2222.2 | 3 | 0.0093 | 4.163 |
| cDNA FLJ53704,<br>moderately similar<br>to Nascent<br>polypeptide-<br>associated complex<br>subunit alpha<br>OS=Homo sapiens<br>PE=2 SV=1 | tr B4DDI8<br> B4DDI8_<br>HUMAN | iEDL<br>SQQ<br>AQL<br>AAA<br>EKFR | 93% | 46.5 | 54.13036 | Ref | -0.19 | -0.2 | 0.44 | 0.25 | 0.55 | 0.097 | 0.89 | 2900 | 2680 | 2880 | 5050 | 4880 | 5230 | 3990 | 6890 | 1112  | 2221.2 | 2 | 0.012  | 5.393 |



|                                                                                                                                           |                                |                            |     |      |          |     |       |       |      |      |      |       |      |       |       |       |       |       |       |       |       |       |        |   |        |       |
|-------------------------------------------------------------------------------------------------------------------------------------------|--------------------------------|----------------------------|-----|------|----------|-----|-------|-------|------|------|------|-------|------|-------|-------|-------|-------|-------|-------|-------|-------|-------|--------|---|--------|-------|
| cDNA FLJ53704,<br>moderately similar<br>to Nascent<br>polypeptide-<br>associated complex<br>subunit alpha<br>OS=Homo sapiens<br>PE=2 SV=1 | tr B4DDI8<br> B4DDI8_<br>HUMAN | sPAS<br>DTYI<br>VFGE<br>Ak | 95% | 53.4 | 54.21548 | Ref | 0.063 | -0.12 | 0.59 | 0.19 | 0.48 | -0.11 | 0.66 | 18600 | 16800 | 16100 | 29500 | 24600 | 26200 | 18200 | 30900 | 698.4 | 2092.1 | 3 | 0.0268 | 12.83 |
| cDNA FLJ53704,<br>moderately similar<br>to Nascent<br>polypeptide-<br>associated complex<br>subunit alpha<br>OS=Homo sapiens<br>PE=2 SV=1 | tr B4DDI8<br> B4DDI8_<br>HUMAN | sPAS<br>DTYI<br>VFGE<br>Ak | 93% | 50.4 | 54.30918 | Ref | 0.15  | -0.03 | 0.48 | 0.1  | 0.55 | 0.15  | 0.62 | 9760  | 10900 | 10500 | 16600 | 14100 | 16800 | 13400 | 18300 | 698.4 | 2092.1 | 3 | 0.0224 | 10.72 |

|                                                                                                                                           |                                |                             |     |      |          |     |        |       |       |       |       |       |       |       |       |       |       |       |       |       |       |       |        |   |        |       |
|-------------------------------------------------------------------------------------------------------------------------------------------|--------------------------------|-----------------------------|-----|------|----------|-----|--------|-------|-------|-------|-------|-------|-------|-------|-------|-------|-------|-------|-------|-------|-------|-------|--------|---|--------|-------|
| cDNA FLJ53704,<br>moderately similar<br>to Nascent<br>polypeptide-<br>associated complex<br>subunit alpha<br>OS=Homo sapiens<br>PE=2 SV=1 | tr B4DDI8<br> B4DDI8_<br>HUMAN | sPAS<br>DTYI<br>VFGE<br>Ak  | 95% | 57.5 | 54.32215 | Ref | -0.029 | 0.032 | 0.54  | 0.26  | 0.5   | 0.033 | 0.54  | 10000 | 8710  | 9860  | 15700 | 14300 | 14700 | 11100 | 15700 | 698.4 | 2092.1 | 3 | 0.0182 | 8.713 |
| cDNA FLJ53704,<br>moderately similar<br>to Nascent<br>polypeptide-<br>associated complex<br>subunit alpha<br>OS=Homo sapiens<br>PE=2 SV=1 | tr B4DDI8<br> B4DDI8_<br>HUMAN | sPAS<br>DTYI<br>VFGE<br>Ak  | 71% | 37.7 | 54.29166 | Ref | 0.18   | 0.3   | 0.15  | 0.33  | 0.34  | 0.22  | 0.31  | 5030  | 4410  | 5210  | 5270  | 6580  | 5800  | 5580  | 5850  | 698.4 | 2092.1 | 3 | 0.0232 | 11.08 |
| PDZ and LIM<br>domain 1 OS=Bos<br>taurus GN=PDLIM1<br>PE=2 SV=1                                                                           | tr A6H7E<br>3 A6H7E3<br>_BOVIN | aLDH<br>SQLP<br>SGLV<br>IDK | 82% | 40.1 | 52.93332 | Ref | 0.24   | -0.29 | -0.33 | -0.43 | 0.023 | -0.42 | -0.12 | 8850  | 9830  | 7360  | 8030  | 8270  | 9880  | 7610  | 9260  | 734.4 | 2200.3 | 3 | 0.0157 | 7.124 |
| PDZ and LIM<br>domain 1 OS=Bos<br>taurus GN=PDLIM1<br>PE=2 SV=1                                                                           | tr A6H7E<br>3 A6H7E3<br>_BOVIN | cGT<br>GIVG<br>VFVK         | 70% | 36.1 | 53.01223 | Ref | 0.13   | -0.44 | -0.36 | -0.24 | -0.04 | -0.58 | -0.06 | 19100 | 16800 | 12300 | 14500 | 17400 | 17400 | 12500 | 17900 | 578.7 | 1733   | 3 | 0.0159 | 9.154 |

|                                                        |                        |                          |     |      |          |     |        |       |       |       |       |       |       |       |       |       |       |       |       |       |       |       |        |   |        |       |
|--------------------------------------------------------|------------------------|--------------------------|-----|------|----------|-----|--------|-------|-------|-------|-------|-------|-------|-------|-------|-------|-------|-------|-------|-------|-------|-------|--------|---|--------|-------|
| PDZ and LIM domain 1 OS=Bos taurus GN=PDLIM1 PE=2 SV=1 | tr A6H7E3 A6H7E3_BOVIN | gcTD NMT LTVA R          | 86% | 37.2 | 49.36725 | Ref | 0.16   | -0.29 | -0.42 | -0.2  | 0.05  | -0.43 | -0.27 | 19200 | 18700 | 14900 | 15300 | 19600 | 20300 | 15200 | 16900 | 816.4 | 1630.8 | 2 | 0.011  | 6.72  |
| PDZ and LIM domain 1 OS=Bos taurus GN=PDLIM1 PE=2 SV=1 | tr A6H7E3 A6H7E3_BOVIN | gcTD NMT LTVA R          | 89% | 39   | 49.36725 | Ref | 0.25   | -0.32 | -0.43 | -0.28 | 0.088 | -0.55 | -0.26 | 13900 | 14100 | 10300 | 10700 | 13100 | 14700 | 9880  | 12000 | 816.4 | 1630.8 | 2 | 0.0108 | 6.647 |
| PDZ and LIM domain 1 OS=Bos taurus GN=PDLIM1 PE=2 SV=1 | tr A6H7E3 A6H7E3_BOVIN | iWSP LVTE EGkR           | 93% | 49.3 | 53.11633 | Ref | 0.21   | -0.42 | -0.36 | -0.2  | 0.13  | -0.69 | -0.2  | 23300 | 23000 | 16100 | 18900 | 23200 | 25700 | 15100 | 21100 | 675.1 | 2022.2 | 3 | 0.0183 | 9.052 |
| PDZ and LIM domain 1 OS=Bos taurus GN=PDLIM1 PE=2 SV=1 | tr A6H7E3 A6H7E3_BOVIN | mNL ASEP QEAL HIGS AHN R | 76% | 39.1 | 54.2926  | Ref | -0.026 | -0.15 | -0.19 | -0.25 | -0.09 | -0.08 | -0.15 | 508   | 566   | 564   | 614   | 651   | 635   | 668   | 633   | 793.7 | 2378.2 | 3 | 0.0142 | 5.971 |
| PDZ and LIM domain 1 OS=Bos taurus GN=PDLIM1 PE=2 SV=1 | tr A6H7E3 A6H7E3_BOVIN | mNL ASEP QEAL HIGS AHN R | 92% | 46.7 | 54.39762 | Ref | 0.056  | 0.019 | -0.5  | -0.31 | -0.19 | -0.25 | 0.095 | 3550  | 4000  | 4230  | 3320  | 4180  | 3950  | 3950  | 5000  | 595.6 | 2378.2 | 4 | 0.0057 | 2.405 |
| PDZ and LIM domain 1 OS=Bos taurus GN=PDLIM1 PE=2 SV=1 | tr A6H7E3 A6H7E3_BOVIN | qSTS FLVL QEIL ESEK      | 66% | 37.2 | 54.81617 | Ref | 0.28   | -0.99 | -0.13 | -0.29 | -0.02 | -0.66 | -0.83 | 332   | 230   | 104   | 210   | 207   | 220   | 147   | 130   | 863.5 | 2587.4 | 3 | 0.0207 | 8.01  |

|                                                                     |                                                                                                                                                                                    |                     |     |      |          |     |       |       |       |        |       |       |       |       |       |       |       |       |       |       |       |       |        |   |        |       |
|---------------------------------------------------------------------|------------------------------------------------------------------------------------------------------------------------------------------------------------------------------------|---------------------|-----|------|----------|-----|-------|-------|-------|--------|-------|-------|-------|-------|-------|-------|-------|-------|-------|-------|-------|-------|--------|---|--------|-------|
| PDZ and LIM domain 1 OS=Bos taurus GN=PDLIM1 PE=2 SV=1              | tr A6H7E3 A6H7E3_BOVIN                                                                                                                                                             | sAVP FTAS PASS SAPR | 95% | 69.5 | 53.20794 | Ref | 0.26  | -0.28 | -0.61 | -0.09  | 0.23  | -0.63 | -0.19 | 14000 | 17400 | 13000 | 11600 | 18300 | 20100 | 11500 | 15500 | 919   | 1836   | 2 | 0.0113 | 6.165 |
| PDZ and LIM domain 1 OS=Bos taurus GN=PDLIM1 PE=2 SV=1              | tr A6H7E3 A6H7E3_BOVIN                                                                                                                                                             | vAAS IGnA Qk        | 95% | 46.8 | 51.37547 | Ref | 0.094 | -0.34 | -0.29 | -0.27  | 0.006 | -0.46 | -0.19 | 14000 | 12500 | 10000 | 11600 | 13100 | 13800 | 10400 | 12400 | 784   | 1565.9 | 2 | 0.0116 | 7.379 |
| PDZ and LIM domain 1 OS=Bos taurus GN=PDLIM1 PE=2 SV=1              | tr A6H7E3 A6H7E3_BOVIN                                                                                                                                                             | vAAS IGnA Qk        | 95% | 54.4 | 51.79819 | Ref | 0.14  | -0.3  | -0.4  | -0.18  | 0.22  | -0.56 | -0.41 | 23500 | 22400 | 18000 | 18800 | 24200 | 27800 | 17000 | 18600 | 784.5 | 1566.9 | 2 | 0.0082 | 5.199 |
| Heat shock protein HSP 90-alpha OS=Sus scrofa GN=HSP90AA1 PE=2 SV=3 | sp O02705 HS90A_PIG,sp P07900 HS90A_HUMAN,sp Q4R4P1 HS90A_MACFA,sp Q76LV2 HS90A_BOVIN,sp Q9GKX7 HS90A_HORSE,tr A8DR93 A8DR93_SHEEP,tr D2HVQ7 D2HVQ7_AI LME,tr F6X099 F6X099_ORN AN | hIYYI TGET k        | 86% | 42.5 | 53.3802  | Ref | 0.19  | -0.15 | 0.027 | -0.011 | -0.26 | 0.23  | -0.17 | 7790  | 9000  | 7690  | 9770  | 10500 | 7720  | 11300 | 8490  | 611.7 | 1832   | 3 | 0.0159 | 8.679 |

|                                                                                 |                                                                                                                                                                                     |                             |     |      |          |     |       |       |       |       |       |       |       |      |      |      |      |      |      |      |      |       |        |   |        |       |
|---------------------------------------------------------------------------------|-------------------------------------------------------------------------------------------------------------------------------------------------------------------------------------|-----------------------------|-----|------|----------|-----|-------|-------|-------|-------|-------|-------|-------|------|------|------|------|------|------|------|------|-------|--------|---|--------|-------|
| Heat shock protein<br>HSP 90-alpha<br>OS=Sus scrofa<br>GN=HSP90AA1<br>PE=2 SV=3 | sp O02705 HS90A_PIG,sp P07900 HS90A_HUMAN,sp Q4R4P1 HS90A_MACFA,sp Q76LV2 HS90A_BOVIN,sp Q9GKX7 HS90A_HORSE,trl A8DR93 A8DR93_SHEEP,trl D2HVQ7 D2HVQ7_AILME,trl F6X099 F6X099_ORNAN | hLEI<br>NPD<br>HSIIE<br>TLR | 95% | 78.8 | 54.14243 | Ref | 0.025 | -0.13 | 0.058 | 0.054 | 0.009 | -0.29 | -0.04 | 6590 | 5820 | 5660 | 7250 | 7970 | 6740 | 5740 | 6750 | 697.7 | 2090.1 | 3 | 0.0127 | 6.06  |
| Heat shock protein<br>HSP 90-alpha<br>OS=Sus scrofa<br>GN=HSP90AA1<br>PE=2 SV=3 | sp O02705 HS90A_PIG,sp P07900 HS90A_HUMAN,sp Q4R4P1 HS90A_MACFA,sp Q76LV2 HS90A_BOVIN,sp Q9GKX7 HS90A_HORSE,trl A8DR93 A8DR93_SHEEP,trl D2HVQ7 D2HVQ7_AILME,trl F6X099 F6X099_ORNAN | hLEI<br>NPD<br>HSIIE<br>TLR | 95% | 69.4 | 54.12299 | Ref | -0.2  | 0.17  | 0.23  | -0.15 | 0.047 | -0.39 | -0.06 | 7670 | 5900 | 8320 | 9730 | 8230 | 8230 | 6340 | 7900 | 523.5 | 2090.1 | 4 | 0.0123 | 5.891 |

|                                                                                 |                                                                                                                                                                                  |                             |     |      |          |     |      |       |       |       |      |       |       |      |      |      |      |      |      |      |      |       |        |   |        |       |
|---------------------------------------------------------------------------------|----------------------------------------------------------------------------------------------------------------------------------------------------------------------------------|-----------------------------|-----|------|----------|-----|------|-------|-------|-------|------|-------|-------|------|------|------|------|------|------|------|------|-------|--------|---|--------|-------|
| Heat shock protein<br>HSP 90-alpha<br>OS=Sus scrofa<br>GN=HSP90AA1<br>PE=2 SV=3 | sp O02705 HS90A_PIG,sp P07900 HS90A_HUMAN,sp Q4R4P1 HS90A_MACFA,sp Q76LV2 HS90A_BOVIN,sp Q9GKX7 HS90A_HORSE,tr A8DR93 A8DR93_SHEEP,tr D2HVQ7 D2HVQ7_AILME,tr F6X099 F6X099_ORNAN | hLEI<br>NPD<br>HSIIE<br>TLR | 95% | 68.4 | 54.09599 | Ref | 0.2  | -0.06 | 0.002 | -0.15 | 0.13 | -0.14 | -0.07 | 3300 | 3860 | 3500 | 4110 | 4060 | 4320 | 3750 | 3890 | 523.5 | 2090.1 | 4 | 0.0094 | 4.494 |
| Heat shock protein<br>HSP 90-alpha<br>OS=Sus scrofa<br>GN=HSP90AA1<br>PE=2 SV=3 | sp O02705 HS90A_PIG,sp P07900 HS90A_HUMAN,sp Q4R4P1 HS90A_MACFA,sp Q76LV2 HS90A_BOVIN,sp Q9GKX7 HS90A_HORSE,tr A8DR93 A8DR93_SHEEP,tr D2HVQ7 D2HVQ7_AILME,tr F6X099 F6X099_ORNAN | hSQF<br>IGYPI<br>TLFV<br>Ek | 85% | 41.9 | 53.51592 | Ref | 0.13 | -0.19 | 0.17  | -0.19 | -0.1 | 0.15  | -0.45 | 712  | 640  | 558  | 803  | 687  | 638  | 796  | 519  | 796.5 | 2386.3 | 3 | 0.0079 | 3.315 |

|                                                                                 |                                                                                                                                                                                  |                      |     |      |          |     |       |       |       |        |      |       |       |       |       |       |       |       |       |       |       |       |        |   |        |       |
|---------------------------------------------------------------------------------|----------------------------------------------------------------------------------------------------------------------------------------------------------------------------------|----------------------|-----|------|----------|-----|-------|-------|-------|--------|------|-------|-------|-------|-------|-------|-------|-------|-------|-------|-------|-------|--------|---|--------|-------|
| Heat shock protein<br>HSP 90-alpha<br>OS=Sus scrofa<br>GN=HSP90AA1<br>PE=2 SV=3 | sp O02705 HS90A_PIG,sp P07900 HS90A_HUMAN,sp Q4R4P1 HS90A_MACFA,sp Q76LV2 HS90A_BOVIN,sp Q9GKX7 HS90A_HORSE,tr A8DR93 A8DR93_SHEEP,tr D2HVQ7 D2HVQ7_AILME,tr F6X099 F6X099_ORNAN | kHLEINPDHSIIE<br>TLR | 90% | 43.4 | 53.35185 | Ref | 0.064 | -0.15 | -0.01 | -0.14  | 0.14 | -0.23 | -0.03 | 10700 | 9460  | 8850  | 11000 | 11000 | 11700 | 9420  | 10700 | 631.6 | 2522.4 | 4 | 0.0189 | 7.502 |
| Heat shock protein<br>HSP 90-alpha<br>OS=Sus scrofa<br>GN=HSP90AA1<br>PE=2 SV=3 | sp O02705 HS90A_PIG,sp P07900 HS90A_HUMAN,sp Q4R4P1 HS90A_MACFA,sp Q76LV2 HS90A_BOVIN,sp Q9GKX7 HS90A_HORSE,tr A8DR93 A8DR93_SHEEP,tr D2HVQ7 D2HVQ7_AILME,tr F6X099 F6X099_ORNAN | kHLEINPDHSIIE<br>TLR | 86% | 40.7 | 53.46869 | Ref | -0.1  | -0.18 | 0.078 | -0.066 | 0.22 | -0.16 | -0.04 | 39300 | 33600 | 34500 | 46300 | 46200 | 49300 | 39500 | 42700 | 631.6 | 2522.4 | 4 | 0.0216 | 8.564 |

|                                                                                 |                                                                                                                                                                                  |                              |     |      |          |     |        |       |       |       |       |       |       |       |       |       |       |       |       |       |       |       |        |   |        |       |
|---------------------------------------------------------------------------------|----------------------------------------------------------------------------------------------------------------------------------------------------------------------------------|------------------------------|-----|------|----------|-----|--------|-------|-------|-------|-------|-------|-------|-------|-------|-------|-------|-------|-------|-------|-------|-------|--------|---|--------|-------|
| Heat shock protein<br>HSP 90-alpha<br>OS=Sus scrofa<br>GN=HSP90AA1<br>PE=2 SV=3 | sp O02705 HS90A_PIG,sp P07900 HS90A_HUMAN,sp Q4R4P1 HS90A_MACFA,sp Q76LV2 HS90A_BOVIN,sp Q9GKX7 HS90A_HORSE,tr A8DR93 A8DR93_SHEEP,tr D2HVQ7 D2HVQ7_AILME,tr F6X099 F6X099_ORNAN | kHLE<br>INPD<br>HSIIE<br>TLR | 88% | 38.9 | 53.35273 | Ref | -0.017 | -0.24 | -0.06 | 0.05  | 0.069 | -0.06 | -0.16 | 34800 | 27800 | 25800 | 32900 | 39000 | 34500 | 32900 | 30600 | 505.5 | 2522.4 | 5 | 0.0192 | 7.615 |
| Heat shock protein<br>HSP 90-alpha<br>OS=Sus scrofa<br>GN=HSP90AA1<br>PE=2 SV=3 | sp O02705 HS90A_PIG,sp P07900 HS90A_HUMAN,sp Q4R4P1 HS90A_MACFA,sp Q76LV2 HS90A_BOVIN,sp Q9GKX7 HS90A_HORSE,tr A8DR93 A8DR93_SHEEP,tr D2HVQ7 D2HVQ7_AILME,tr F6X099 F6X099_ORNAN | nPD<br>DITN<br>EEYG<br>EFYK  | 94% | 50.3 | 52.80344 | Ref | 0.21   | -0.03 | 0.028 | -0.18 | -0.25 | -0.05 | -0.14 | 7050  | 6760  | 6210  | 7250  | 6940  | 5770  | 6910  | 6450  | 814.7 | 2441.2 | 3 | 0.0188 | 7.692 |



|                                                                                 |                                                                                                                                                                                  |                |     |      |          |     |       |       |      |       |       |      |       |      |      |      |      |      |      |      |      |       |        |   |        |       |
|---------------------------------------------------------------------------------|----------------------------------------------------------------------------------------------------------------------------------------------------------------------------------|----------------|-----|------|----------|-----|-------|-------|------|-------|-------|------|-------|------|------|------|------|------|------|------|------|-------|--------|---|--------|-------|
| Heat shock protein<br>HSP 90-alpha<br>OS=Sus scrofa<br>GN=HSP90AA1<br>PE=2 SV=3 | sp O02705 HS90A_PIG,sp P07900 HS90A_HUMAN,sp Q4R4P1 HS90A_MACFA,sp Q76LV2 HS90A_BOVIN,sp Q9GKX7 HS90A_HORSE,tr A8DR93 A8DR93_SHEEP,tr D2HVQ7 D2HVQ7_AILME,tr F6X099 F6X099_ORNAN | rAPFDLFE<br>NR | 85% | 40.9 | 52.5465  | Ref | 0.069 | 0.037 | 0.17 | -0.14 | -0.26 | 0.2  | -0.18 | 2520 | 2760 | 2930 | 3600 | 3200 | 2570 | 3690 | 2820 | 523.6 | 1567.8 | 3 | 0.0116 | 7.419 |
| Heat shock protein<br>HSP 90-alpha<br>OS=Sus scrofa<br>GN=HSP90AA1<br>PE=2 SV=3 | sp O02705 HS90A_PIG,sp P07900 HS90A_HUMAN,sp Q4R4P1 HS90A_MACFA,sp Q76LV2 HS90A_BOVIN,sp Q9GKX7 HS90A_HORSE,tr A8DR93 A8DR93_SHEEP,tr D2HVQ7 D2HVQ7_AILME,tr F6X099 F6X099_ORNAN | rAPFDLFE<br>NR | 91% | 45.4 | 52.47983 | Ref | 0.096 | -0.16 | 0.16 | -0.2  | -0.37 | 0.14 | -0.03 | 6600 | 6140 | 5580 | 7830 | 6710 | 5220 | 7720 | 6820 | 523.6 | 1567.8 | 3 | 0.0104 | 6.615 |

|                                                                                     |                                                                        |                        |     |      |          |     |        |       |       |       |      |       |       |      |      |      |      |      |      |      |      |       |        |   |        |       |
|-------------------------------------------------------------------------------------|------------------------------------------------------------------------|------------------------|-----|------|----------|-----|--------|-------|-------|-------|------|-------|-------|------|------|------|------|------|------|------|------|-------|--------|---|--------|-------|
| Heterogeneous nuclear ribonucleoprotein D<br>OS=Bos taurus<br>GN=HNRPD PE=2<br>SV=1 | tr A5D9H5 A5D9H5_BOVIN, tr F1PTP9 F1PTP9_CANFA, tr F7APH2 F7APH2_MACMU | gFGF<br>VLFk           | 88% | 38.7 | 50.03262 | Ref | -0.17  | -0.27 | -0.09 | -0.14 | 0.29 | -0.57 | -0.03 | 4080 | 3100 | 3150 | 3990 | 4250 | 5010 | 2880 | 4170 | 762   | 1521.9 | 2 | 0.0035 | 2.307 |
| Heterogeneous nuclear ribonucleoprotein D<br>OS=Bos taurus<br>GN=HNRPD PE=2<br>SV=1 | tr A5D9H5 A5D9H5_BOVIN, tr F1PTP9 F1PTP9_CANFA, tr F7APH2 F7APH2_MACMU | gFGF<br>VLFk           | 57% | 31.5 | 50.92924 | Ref | -0.13  | -0.38 | -0.24 | -0.28 | 0.17 | -0.65 | 0.41  | 5480 | 4330 | 3940 | 4870 | 5230 | 6260 | 3690 | 7670 | 508.3 | 1521.9 | 3 | 0.0196 | 12.85 |
| Heterogeneous nuclear ribonucleoprotein D<br>OS=Bos taurus<br>GN=HNRPD PE=2<br>SV=1 | tr A5D9H5 A5D9H5_BOVIN, tr F1PTP9 F1PTP9_CANFA, tr F7APH2 F7APH2_MACMU | gFGF<br>VLFk           | 91% | 41   | 50.27749 | Ref | 0.0012 | -0.27 | -0.09 | -0.25 | 0.13 | -0.53 | 0.079 | 2660 | 2310 | 2080 | 2650 | 2610 | 2950 | 1960 | 2970 | 762   | 1521.9 | 2 | 0.0079 | 5.197 |
| Heterogeneous nuclear ribonucleoprotein D<br>OS=Bos taurus<br>GN=HNRPD PE=2<br>SV=1 | tr A5D9H5 A5D9H5_BOVIN, tr F1PTP9 F1PTP9_CANFA, tr F7APH2 F7APH2_MACMU | gFGF<br>VLFk           | 57% | 31.5 | 50.95086 | Ref | -0.2   | -0.32 | -0.31 | -0.18 | 0.18 | -0.41 | 0.29  | 1690 | 1300 | 1290 | 1460 | 1760 | 1970 | 1370 | 2210 | 508.3 | 1521.9 | 3 | 0.0208 | 13.64 |
| Heterogeneous nuclear ribonucleoprotein D<br>OS=Bos taurus<br>GN=HNRPD PE=2<br>SV=1 | tr A5D9H5 A5D9H5_BOVIN, tr F1PTP9 F1PTP9_CANFA, tr F7APH2 F7APH2_MACMU | gGD<br>QQS<br>GYG<br>k | 63% | 33.2 | 51.80433 | Ref | -0.075 | -0.55 | 0.26  | -0.36 | 0.26 | -1.1  | 0.27  | 3840 | 3240 | 2530 | 4970 | 3580 | 4790 | 1950 | 5010 | 802.9 | 1603.8 | 2 | 0.0167 | 10.41 |

|                                                                                     |                                                                        |                            |     |      |          |     |        |       |       |       |       |       |       |       |       |       |       |       |       |       |       |       |        |   |        |       |
|-------------------------------------------------------------------------------------|------------------------------------------------------------------------|----------------------------|-----|------|----------|-----|--------|-------|-------|-------|-------|-------|-------|-------|-------|-------|-------|-------|-------|-------|-------|-------|--------|---|--------|-------|
| Heterogeneous nuclear ribonucleoprotein D<br>OS=Bos taurus<br>GN=HNRPD PE=2<br>SV=1 | tr A5D9H5 A5D9H5_BOVIN, tr F1PTP9 F1PTP9_CANFA, tr F7APH2 F7APH2_MACMU | hSEA<br>ATA<br>QR          | 93% | 46   | 50.25015 | Ref | 0.37   | -0.36 | -0.64 | -0.3  | -0.14 | -0.42 | 0.038 | 325   | 294   | 192   | 178   | 248   | 242   | 208   | 283   | 425.6 | 1273.7 | 3 | 0.0084 | 6.614 |
| Heterogeneous nuclear ribonucleoprotein D<br>OS=Bos taurus<br>GN=HNRPD PE=2<br>SV=1 | tr A5D9H5 A5D9H5_BOVIN, tr F1PTP9 F1PTP9_CANFA, tr F7APH2 F7APH2_MACMU | iFVG<br>GLSP<br>DTPE<br>Ek | 95% | 59   | 53.9311  | Ref | -0.079 | -0.2  | -0.31 | -0.25 | 0.26  | -0.42 | 0.14  | 15500 | 13600 | 13600 | 14100 | 16200 | 20100 | 13100 | 19200 | 699.7 | 2096.1 | 3 | 0.0161 | 7.682 |
| Heterogeneous nuclear ribonucleoprotein D<br>OS=Bos taurus<br>GN=HNRPD PE=2<br>SV=1 | tr A5D9H5 A5D9H5_BOVIN, tr F1PTP9 F1PTP9_CANFA, tr F7APH2 F7APH2_MACMU | iFVG<br>GLSP<br>DTPE<br>Ek | 95% | 61.7 | 53.92507 | Ref | -0.045 | -0.32 | -0.23 | -0.6  | 0.19  | -0.29 | 0.15  | 28400 | 21700 | 19400 | 23300 | 19800 | 29900 | 22400 | 30100 | 699.7 | 2096.1 | 3 | 0.0154 | 7.325 |
| Heterogeneous nuclear ribonucleoprotein D<br>OS=Bos taurus<br>GN=HNRPD PE=2<br>SV=1 | tr A5D9H5 A5D9H5_BOVIN, tr F1PTP9 F1PTP9_CANFA, tr F7APH2 F7APH2_MACMU | mFIG<br>GLS<br>WDT<br>Tk   | 89% | 45.6 | 53.91663 | Ref | -0.008 | -0.32 | -0.16 | -0.2  | -0.17 | -0.25 | -0.14 | 4390  | 3020  | 2650  | 3300  | 3550  | 3160  | 3130  | 3350  | 655.4 | 1963.1 | 3 | 0.013  | 6.612 |
| Heterogeneous nuclear ribonucleoprotein D<br>OS=Bos taurus<br>GN=HNRPD PE=2<br>SV=1 | tr A5D9H5 A5D9H5_BOVIN, tr F1PTP9 F1PTP9_CANFA, tr F7APH2 F7APH2_MACMU | yHN<br>VGLS<br>k           | 72% | 36.1 | 52.44121 | Ref | -0.037 | -0.26 | -0.06 | -0.25 | 0.036 | -0.23 | -0.04 | 40400 | 34400 | 32000 | 41200 | 39700 | 42400 | 36800 | 41800 | 509.3 | 1524.9 | 3 | 0.0052 | 3.433 |

|                                           |                                                                                                                                              |                           |     |      |          |     |        |       |       |        |       |       |       |       |       |       |       |        |       |       |        |       |        |   |        |       |
|-------------------------------------------|----------------------------------------------------------------------------------------------------------------------------------------------|---------------------------|-----|------|----------|-----|--------|-------|-------|--------|-------|-------|-------|-------|-------|-------|-------|--------|-------|-------|--------|-------|--------|---|--------|-------|
| Heterogeneous nuclear ribonucleoprotein D | tr A5D9H5 A5D9H5_BOVIN, tr F1PTP9 F1PTP9_CANFA, tr F7APH2 F7APH2_MACMU                                                                       | yHN<br>VGLS<br>k          | 58% | 32.9 | 52.26474 | Ref | -0.032 | -0.24 | -0.11 | -0.26  | 0.085 | -0.16 | -0.11 | 11700 | 10100 | 9520  | 11700 | 11600  | 12900 | 11400 | 11700  | 509.3 | 1524.9 | 3 | 0.0036 | 2.352 |
| Tropomyosin 1 (Alpha) isoform 4           | tr D9YZV5 D9YZV5_HUMAN, tr E9Q450 E9Q450_MOUSE, tr F6YS84 F6YS84_CALJA, tr F7GV59 F7GV59_MACMU, tr Q2Q1M7 Q2Q1M7_CEREL, tr Q63583 Q63583_RAT | aELS<br>EGQ<br>VR         | 52% | 31.2 | 51.76777 | Ref | -0.74  | 0.34  | -1.1  | -0.042 | -0.1  | -0.21 | 0.076 | 89300 | 46700 | 1E+05 | 45000 | 102000 | 85400 | 82400 | 100000 | 646.9 | 1291.7 | 2 | 0.0121 | 9.33  |
| Tropomyosin 1 (Alpha) isoform 4           | tr D9YZV5 D9YZV5_HUMAN, tr E9Q450 E9Q450_MOUSE, tr F6YS84 F6YS84_CALJA, tr F7GV59 F7GV59_MACMU, tr Q2Q1M7 Q2Q1M7_CEREL, tr Q63583 Q63583_RAT | aTD<br>AEA<br>DVA<br>SLNR | 95% | 58.6 | 51.92314 | Ref | -1.4   | 0.89  | -1.4  | 0.29   | -0.63 | 0.14  | -0.83 | 29000 | 9690  | 50500 | 11700 | 41300  | 19100 | 33900 | 17200  | 818.9 | 1635.8 | 2 | 0.0101 | 6.17  |

|                                                                               |                                                                                                                                                                      |            |     |      |          |     |                            |      |       |        |       |       |       |       |                            |       |       |        |       |       |       |       |        |   |        |       |
|-------------------------------------------------------------------------------|----------------------------------------------------------------------------------------------------------------------------------------------------------------------|------------|-----|------|----------|-----|----------------------------|------|-------|--------|-------|-------|-------|-------|----------------------------|-------|-------|--------|-------|-------|-------|-------|--------|---|--------|-------|
| Tropomyosin 1<br>(Alpha) isoform 4<br>OS=Homo sapiens<br>GN=TPM1 PE=3<br>SV=1 | tr D9YZV5 D9YZV5_HUMAN, tr E9Q450 E9Q450_MOUSE, tr F6YS84 F6YS84_CALJA, tr F7GV59 F7GV59_MA CMU, tr Q2Q1M7 Q2Q1M7_C EREL, tr Q63583 Q63583_RAT, tr Q63607 Q63607_RAT | hIAE DAD R | 72% | 33.4 | 49.82877 | Ref | Value Missing (-1.7364192) | 0.87 | -1.1  | 0.19   | -0.59 | 0.12  | -0.66 | 1E+05 | Value Missing (-1.7364192) | 2E+05 | 68400 | 187000 | 95000 | 2E+05 | 93700 | 410.9 | 1229.6 | 3 | 0.0104 | 8.465 |
| Tropomyosin 1<br>(Alpha) isoform 4<br>OS=Homo sapiens<br>GN=TPM1 PE=3<br>SV=1 | tr D9YZV5 D9YZV5_HUMAN, tr E9Q450 E9Q450_MOUSE, tr F6YS84 F6YS84_CALJA, tr F7GV59 F7GV59_MA CMU, tr Q2Q1M7 Q2Q1M7_C EREL, tr Q63583 Q63583_RAT, tr Q63607 Q63607_RAT | hIAE DAD R | 61% | 31.1 | 49.84397 | Ref | -0.74                      | 0.54 | -0.37 | -0.053 | -0.31 | -0.12 | -0.51 | 25400 | 14100                      | 37300 | 22300 | 30600  | 22400 | 26700 | 20200 | 410.9 | 1229.6 | 3 | 0.0111 | 9.001 |

|                                                                               |                                                                                                                                                                      |                            |     |      |          |     |       |      |       |       |       |       |      |       |       |       |       |       |       |       |       |       |        |   |        |       |
|-------------------------------------------------------------------------------|----------------------------------------------------------------------------------------------------------------------------------------------------------------------|----------------------------|-----|------|----------|-----|-------|------|-------|-------|-------|-------|------|-------|-------|-------|-------|-------|-------|-------|-------|-------|--------|---|--------|-------|
| Tropomyosin 1<br>(Alpha) isoform 4<br>OS=Homo sapiens<br>GN=TPM1 PE=3<br>SV=1 | tr D9YZV5 D9YZV5_HUMAN, tr E9Q450 E9Q450_MOUSE, tr F6YS84 F6YS84_CALJA, tr F7GV59 F7GV59_MA CMU, tr Q2Q1M7 Q2Q1M7_C EREL, tr Q63583 Q63583_RAT, tr Q63607 Q63607_RAT | IMD<br>QTLK                | 81% | 37.5 | 51.86773 | Ref | -0.98 | 0.25 | -0.79 | 0.041 | -0.02 | -0.13 | 0.2  | 35100 | 19500 | 49700 | 27100 | 53100 | 44400 | 43000 | 53500 | 728.9 | 1455.8 | 2 | 0.0237 | 16.24 |
| Tropomyosin 1<br>(Alpha) isoform 4<br>OS=Homo sapiens<br>GN=TPM1 PE=3<br>SV=1 | tr D9YZV5 D9YZV5_HUMAN, tr E9Q450 E9Q450_MOUSE, tr F6YS84 F6YS84_CALJA, tr F7GV59 F7GV59_MA CMU, tr Q2Q1M7 Q2Q1M7_C EREL, tr Q63583 Q63583_RAT, tr Q63607 Q63607_RAT | kATD<br>AEA<br>DVA<br>SLNR | 51% | 33.5 | 53.98428 | Ref | -0.32 | 0.42 | -0.8  | -0.14 | -0.35 | 0.12  | -0.3 | 15300 | 12600 | 22800 | 11000 | 19100 | 14500 | 20900 | 15500 | 690.4 | 2068.1 | 3 | 0.0171 | 8.279 |

|                                                                                      |                                                                                                                                                                             |                              |            |             |                 |            |                                   |             |                                   |             |              |             |              |             |                                   |             |                                   |             |             |             |             |              |               |          |               |              |
|--------------------------------------------------------------------------------------|-----------------------------------------------------------------------------------------------------------------------------------------------------------------------------|------------------------------|------------|-------------|-----------------|------------|-----------------------------------|-------------|-----------------------------------|-------------|--------------|-------------|--------------|-------------|-----------------------------------|-------------|-----------------------------------|-------------|-------------|-------------|-------------|--------------|---------------|----------|---------------|--------------|
| <p>Tropomyosin 1 (Alpha) isoform 4<br/>OS=Homo sapiens<br/>GN=TPM1 PE=3<br/>SV=1</p> | <p>tr D9YZV5 D9YZV5_HUMAN, tr E9Q450 E9Q450_MOUSE, tr F6YS84 F6YS84_CALJA, tr F7GV59 F7GV59_MA CMU, tr Q2Q1M7 Q2Q1M7_C EREL, tr Q63583 Q63583_RAT, tr Q63607 Q63607_RAT</p> | <p>kLVII<br/>ESDL<br/>ER</p> | <p>79%</p> | <p>36.6</p> | <p>50.5937</p>  | <p>Ref</p> | <p>-1.2</p>                       | <p>0.67</p> | <p>-1.1</p>                       | <p>0.24</p> | <p>-0.58</p> | <p>0.15</p> | <p>-0.54</p> | <p>5130</p> | <p>1860</p>                       | <p>7560</p> | <p>2490</p>                       | <p>6950</p> | <p>3420</p> | <p>5930</p> | <p>3640</p> | <p>641.7</p> | <p>1922.2</p> | <p>3</p> | <p>0.0145</p> | <p>7.545</p> |
| <p>Tropomyosin 1 (Alpha) isoform 4<br/>OS=Homo sapiens<br/>GN=TPM1 PE=3<br/>SV=1</p> | <p>tr D9YZV5 D9YZV5_HUMAN, tr E9Q450 E9Q450_MOUSE, tr F6YS84 F6YS84_CALJA, tr F7GV59 F7GV59_MA CMU, tr Q2Q1M7 Q2Q1M7_C EREL, tr Q63583 Q63583_RAT, tr Q63607 Q63607_RAT</p> | <p>mDA<br/>Ik</p>            | <p>89%</p> | <p>39.3</p> | <p>50.14025</p> | <p>Ref</p> | <p>Value Missing (-1.6664586)</p> | <p>0.95</p> | <p>Value Missing (-1.9507469)</p> | <p>0.13</p> | <p>-0.98</p> | <p>0.23</p> | <p>-0.23</p> | <p>4470</p> | <p>Value Missing (-1.6664586)</p> | <p>7920</p> | <p>Value Missing (-1.9507469)</p> | <p>5580</p> | <p>2250</p> | <p>5430</p> | <p>3920</p> | <p>462.3</p> | <p>922.5</p>  | <p>2</p> | <p>0.0148</p> | <p>15.98</p> |

|                                                                                          |                                                                                                                                                                            |                   |            |             |                 |            |             |             |             |              |             |             |             |             |             |             |            |             |             |             |             |              |              |          |               |              |
|------------------------------------------------------------------------------------------|----------------------------------------------------------------------------------------------------------------------------------------------------------------------------|-------------------|------------|-------------|-----------------|------------|-------------|-------------|-------------|--------------|-------------|-------------|-------------|-------------|-------------|-------------|------------|-------------|-------------|-------------|-------------|--------------|--------------|----------|---------------|--------------|
| <p>Tropomyosin 1<br/>(Alpha) isoform 4<br/>OS=Homo sapiens<br/>GN=TPM1 PE=3<br/>SV=1</p> | <p>tr D9YZV5 D9YZV5_HUMAN, tr E9Q450 E9Q450_MOUSE, tr F6YS84 F6YS84_CALJA, tr F7GV59 F7GV59_MA CMU, tr Q2Q1M7 Q2Q1M7_CEREL, tr Q63583 Q63583_RAT, tr Q63607 Q63607_RAT</p> | <p>mDA<br/>lk</p> | <p>88%</p> | <p>38.9</p> | <p>50.07965</p> | <p>Ref</p> | <p>-1.4</p> | <p>0.76</p> | <p>-1.8</p> | <p>0.14</p>  | <p>-0.5</p> | <p>0.36</p> | <p>-0.1</p> | <p>1850</p> | <p>840</p>  | <p>3940</p> | <p>776</p> | <p>3180</p> | <p>1780</p> | <p>3380</p> | <p>2450</p> | <p>462.3</p> | <p>922.5</p> | <p>2</p> | <p>0.0137</p> | <p>14.85</p> |
| <p>Tropomyosin 1<br/>(Alpha) isoform 4<br/>OS=Homo sapiens<br/>GN=TPM1 PE=3<br/>SV=1</p> | <p>tr D9YZV5 D9YZV5_HUMAN, tr E9Q450 E9Q450_MOUSE, tr F6YS84 F6YS84_CALJA, tr F7GV59 F7GV59_MA CMU, tr Q2Q1M7 Q2Q1M7_CEREL, tr Q63583 Q63583_RAT, tr Q63607 Q63607_RAT</p> | <p>mDA<br/>lk</p> | <p>73%</p> | <p>32.7</p> | <p>49.42231</p> | <p>Ref</p> | <p>1.3</p>  | <p>0.34</p> | <p>-2.4</p> | <p>-0.36</p> | <p>-1.3</p> | <p>-0.6</p> | <p>-1.5</p> | <p>528</p>  | <p>1090</p> | <p>609</p>  | <p>103</p> | <p>463</p>  | <p>206</p>  | <p>357</p>  | <p>197</p>  | <p>470.3</p> | <p>938.5</p> | <p>2</p> | <p>0.01</p>   | <p>10.7</p>  |



|                                                                                    |                                                                                                                                                                                                                                         |                    |     |      |          |     |      |       |       |       |       |       |       |       |       |       |       |        |       |       |        |       |        |   |        |       |
|------------------------------------------------------------------------------------|-----------------------------------------------------------------------------------------------------------------------------------------------------------------------------------------------------------------------------------------|--------------------|-----|------|----------|-----|------|-------|-------|-------|-------|-------|-------|-------|-------|-------|-------|--------|-------|-------|--------|-------|--------|---|--------|-------|
| Tropomyosin 1<br>(Alpha) isoform 4<br>OS=Homo sapiens<br>GN=TPM1 PE=3<br>SV=1      | tr D9YZV5 D9YZV5_HUMAN, tr E9Q450 E9Q450_MOUSE, tr F6YS84 F6YS84_CALJA, tr F7GV59 F7GV59_MA, tr CMU, tr Q2Q1M7 Q2Q1M7_CEREL, tr Q63583 Q63583_RAT, tr Q63607 Q63607_RAT                                                                 | siDD<br>LEEK       | 76% | 37.6 | 52.56576 | Ref | -1.6 | 0.9   | -1.6  | 0.3   | -0.74 | 0.15  | -0.72 | 3E+05 | 79000 | 5E+05 | 91400 | 390000 | 2E+05 | 3E+05 | 174000 | 519.6 | 1555.8 | 3 | 0.0149 | 9.597 |
| Heterogeneous nuclear ribonucleoprotein A1 OS=Pan troglodytes GN=HNRNPA1 PE=2 SV=1 | 4 ROA1_PANTR, sp P04256 ROA1_RAT, sp P09651 ROA1_HUMAN, sp P09867 ROA1_BOVIN, sp P49312 ROA1_MOUSE, tr D4ACJ7 D4ACJ7_RAT, tr E1BK5 E1BK5_BOVIN, tr E2QYP1 E2QYP1_CANFA, tr F1PP96 F1PP96_CANFA, tr F6YZ44 F6YZ44_HO, tr F7RSE, tr F7RSE | ieVIE<br>IMT<br>DR | 85% | 39.8 | 52.50922 | Ref | 0.67 | -0.23 | -0.08 | -0.32 | -0.01 | -0.24 | 0.072 | 19400 | 26900 | 15600 | 19400 | 18100  | 19600 | 17500 | 21500  | 761.9 | 1521.8 | 2 | 0.0138 | 9.047 |

|                                                                                    |                                                                                                                                                                                                                                       |              |     |      |          |     |      |       |       |       |       |       |       |      |      |      |      |      |      |      |      |       |        |   |        |       |
|------------------------------------------------------------------------------------|---------------------------------------------------------------------------------------------------------------------------------------------------------------------------------------------------------------------------------------|--------------|-----|------|----------|-----|------|-------|-------|-------|-------|-------|-------|------|------|------|------|------|------|------|------|-------|--------|---|--------|-------|
| Heterogeneous nuclear ribonucleoprotein A1 OS=Pan troglodytes GN=HNRNPA1 PE=2 SV=1 | 4 ROA1_PANTR,sp P04256 ROA1_RA T,sp P09651 ROA1_HUMAN,sp P09867 ROA1_BOVIN,sp P49312 ROA1_MOUSE,tr D4ACJ7 D4ACJ7_RA T,tr E1KB B5 E1BKB 5_BOVIN, tr E2QYP 1 E2QYP1 _CANFA, tr F1PP96  F1PP96_C ANFA, tr F 6YZ44 F6 YZ44_HO RSE, tr F7  | iEVIE IMT DR | 86% | 40.3 | 52.51244 | Ref | 0.63 | -0.27 | -0.01 | -0.35 | 0.007 | -0.14 | -0.04 | 2390 | 3050 | 1780 | 2390 | 2070 | 2330 | 2190 | 2330 | 761.9 | 1521.8 | 2 | 0.01   | 6.551 |
|                                                                                    | 4 ROA1_PANTR,sp P04256 ROA1_RA T,sp P09651 ROA1_HUMAN,sp P09867 ROA1_BOVIN,sp P49312 ROA1_MOUSE, tr D4ACJ7 D4ACJ7_RA T,tr E1KB B5 E1BKB 5_BOVIN, tr E2QYP 1 E2QYP1 _CANFA, tr F1PP96  F1PP96_C ANFA, tr F 6YZ44 F6 YZ44_HO RSE, tr F7 | iEVIE IMT DR | 51% | 31.9 | 52.55272 | Ref | 0.64 | -0.65 | 0.04  | -0.16 | -0.07 | -0.19 | 0.26  | 559  | 801  | 357  | 645  | 619  | 577  | 552  | 752  | 761.9 | 1521.8 | 2 | 0.0105 | 6.88  |

|                                                                                    |                                                                                                                                                                                                                           |   |     |      |          |     |      |       |       |        |       |       |      |      |      |      |      |      |      |      |      |       |        |   |        |       |
|------------------------------------------------------------------------------------|---------------------------------------------------------------------------------------------------------------------------------------------------------------------------------------------------------------------------|---|-----|------|----------|-----|------|-------|-------|--------|-------|-------|------|------|------|------|------|------|------|------|------|-------|--------|---|--------|-------|
| Heterogeneous nuclear ribonucleoprotein A1 OS=Pan troglodytes GN=HNRNPA1 PE=2 SV=1 | 4 ROA1_PANTR,sp P04256 ROA1_RA T,sp P09651 ROA1_HUMAN,sp P09867 ROA1_BOVIN,sp P49312 ROA1_MOUSE,tr D4ACJ7 D4ACJ7_RA T,tr E1BKB5 E1BKB5_BOVIN,tr E2QYP1 E2QYP1_CANFA,tr F1PP96 F1PP96_C ANFA,tr F6Y244 F6YZ44_HO RSE,tr F7 | R | 95% | 64.3 | 54.52406 | Ref | 0.48 | -0.27 | -0.16 | -0.059 | -0.07 | -0.16 | 0.21 | 7050 | 8570 | 5530 | 6700 | 7910 | 6870 | 6730 | 8620 | 841.1 | 2520.4 | 3 | 0.0267 | 10.58 |
|                                                                                    | 4 ROA1_PANTR,sp P04256 ROA1_RA T,sp P09651 ROA1_HUMAN,sp P09867 ROA1_BOVIN,sp P49312 ROA1_MOUSE,tr D4ACJ7 D4ACJ7_RA T,tr E1BKB5 E1BKB5_BOVIN,tr E2QYP1 E2QYP1_CANFA,tr F1PP96 F1PP96_C ANFA,tr F6Y244 F6YZ44_HO RSE,tr F7 | R | 89% | 45.7 | 54.16908 | Ref | 0.25 | -0.23 | -0.32 | 0.077  | 0.036 | 0.026 | 0.16 | 683  | 695  | 540  | 568  | 824  | 700  | 726  | 791  | 841.1 | 2520.4 | 3 | 0.0089 | 3.533 |

|                                                                                    |                                                                                                                                                                                                                                |                                                                                                                                                                                                                                  |                                   |      |          |          |        |        |       |        |       |       |       |      |      |      |      |      |      |      |      |       |        |        |        |       |
|------------------------------------------------------------------------------------|--------------------------------------------------------------------------------------------------------------------------------------------------------------------------------------------------------------------------------|----------------------------------------------------------------------------------------------------------------------------------------------------------------------------------------------------------------------------------|-----------------------------------|------|----------|----------|--------|--------|-------|--------|-------|-------|-------|------|------|------|------|------|------|------|------|-------|--------|--------|--------|-------|
| Heterogeneous nuclear ribonucleoprotein A1 OS=Pan troglodytes GN=HNRNPA1 PE=2 SV=1 | 4 ROA1_PANTR,sp P04256 ROA1_RA T,sp P09651 ROA1_HUMAN,sp P09867 ROA1_BOVIN,sp P49312 ROA1_MOUSE,tr D4ACJ7 D4ACJ7_RA T,tr E1BKB5 E1BKB5_BOVIN, tr E2QYP1 E2QYP1_CANFA, tr F1PP96 F1PP96_C ANFA, tr F6Y244 F6YZ44_HO RSE, tr F7R | nQG<br>GYG<br>GSSS<br>SSSY<br>GSG                                                                                                                                                                                                | 95%                               | 58.6 | 47.94007 | Ref      | -0.024 | 0.037  | -0.17 | -0.083 | 0.13  | -0.09 | 0.36  | 1100 | 1010 | 1140 | 1110 | 1300 | 1320 | 1180 | 1600 | 999.9 | 1997.9 | 2      | 0.0132 | 6.581 |
|                                                                                    | Heterogeneous nuclear ribonucleoprotein A1 OS=Pan troglodytes GN=HNRNPA1 PE=2 SV=1                                                                                                                                             | 4 ROA1_PANTR,sp P04256 ROA1_RA T,sp P09651 ROA1_HUMAN,sp P09867 ROA1_BOVIN,sp P49312 ROA1_MOUSE, tr D4ACJ7 D4ACJ7_RA T, tr E1BKB5 E1BKB5_BOVIN, tr E2QYP1 E2QYP1_CANFA, tr F1PP96 F1PP96_C ANFA, tr F6Y244 F6YZ44_HO RSE, tr F7R | nQG<br>GYG<br>GSSS<br>SSSY<br>GSG | 95%  | 81       | 46.82741 | Ref    | -0.081 | 0.17  | -0.42  | 0.018 | 0.34  | -0.43 | 0.34 | 3430 | 2890 | 3730 | 2790 | 4160 | 4550 | 2790 | 4700  | 1000   | 1998.9 | 2      | 0.014 |

|                                                                                    |                                                                                                                                                                                                                                                                           |                                                                                                                                                                                                                                                                           |                   |     |      |          |          |       |       |       |        |       |       |       |       |       |       |       |       |       |       |       |       |        |        |        |        |
|------------------------------------------------------------------------------------|---------------------------------------------------------------------------------------------------------------------------------------------------------------------------------------------------------------------------------------------------------------------------|---------------------------------------------------------------------------------------------------------------------------------------------------------------------------------------------------------------------------------------------------------------------------|-------------------|-----|------|----------|----------|-------|-------|-------|--------|-------|-------|-------|-------|-------|-------|-------|-------|-------|-------|-------|-------|--------|--------|--------|--------|
| Heterogeneous nuclear ribonucleoprotein A1 OS=Pan troglodytes GN=HNRNPA1 PE=2 SV=1 | 4 ROA1_PANTR,sp P04256 ROA1_RA T,sp P09651 ROA1_HUMAN,sp P09867 ROA1_BOVIN,sp P49312 ROA1_MOUSE,transcript D4ACJ7 D4ACJ7_RA T,transcript E1BKB5 E1BKB5_BOVIN,transcript E2QYP1 E2QYP1_CANFA,transcript F1PP96 F1PP96_C ANFA,transcript F6Y244 F6YZ44_HO RSE,transcript F7 | sSGP YGG GGQ YFAK                                                                                                                                                                                                                                                         | PR                | 95% | 56.2 | 54.38783 | Ref      | -0.16 | 0.12  | -0.26 | -0.049 | 0.31  | -0.29 | 0.31  | 17200 | 13400 | 17600 | 15200 | 19400 | 21600 | 15000 | 22500 | 746.4 | 2236.2 | 3      | 0.0214 | 9.547  |
|                                                                                    | Heterogeneous nuclear ribonucleoprotein A1 OS=Pan troglodytes GN=HNRNPA1 PE=2 SV=1                                                                                                                                                                                        | 4 ROA1_PANTR,sp P04256 ROA1_RA T,sp P09651 ROA1_HUMAN,sp P09867 ROA1_BOVIN,sp P49312 ROA1_MOUSE,transcript D4ACJ7 D4ACJ7_RA T,transcript E1BKB5 E1BKB5_BOVIN,transcript E2QYP1 E2QYP1_CANFA,transcript F1PP96 F1PP96_C ANFA,transcript F6Y244 F6YZ44_HO RSE,transcript F7 | sSGP YGG GGQ YFAK | PR  | 87%  | 44       | 54.40601 | Ref   | 0.039 | -0.09 | -0.15  | 0.037 | 0.17  | -0.29 | 0.33  | 32700 | 29600 | 29300 | 31600 | 39600 | 38000 | 28900 | 44100 | 746.4  | 2236.2 | 3      | 0.0179 |

|                                                                                    |                                                                                                                                                                                                                                                                           |                                                                                                                                                                                                                                                                           |                   |     |     |          |          |        |        |       |       |      |       |       |       |       |       |       |       |       |       |       |       |        |        |        |        |
|------------------------------------------------------------------------------------|---------------------------------------------------------------------------------------------------------------------------------------------------------------------------------------------------------------------------------------------------------------------------|---------------------------------------------------------------------------------------------------------------------------------------------------------------------------------------------------------------------------------------------------------------------------|-------------------|-----|-----|----------|----------|--------|--------|-------|-------|------|-------|-------|-------|-------|-------|-------|-------|-------|-------|-------|-------|--------|--------|--------|--------|
| Heterogeneous nuclear ribonucleoprotein A1 OS=Pan troglodytes GN=HNRNPA1 PE=2 SV=1 | 4 ROA1_PANTR,sp P04256 ROA1_RA T,sp P09651 ROA1_HUMAN,sp P09867 ROA1_BOVIN,sp P49312 ROA1_MOUSE,transcript D4ACJ7 D4ACJ7_RA T,transcript E1BKB5 E1BKB5_BOVIN,transcript E2QYP1 E2QYP1_CANFA,transcript F1PP96 F1PP96_C ANFA,transcript F6Y244 F6YZ44_HO RSE,transcript F7 | sSGP YGG GGQ YFAK                                                                                                                                                                                                                                                         | PR                | 94% | 52  | 54.41016 | Ref      | -0.022 | -0.01  | -0.15 | -0.22 | 0.28 | -0.29 | 0.38  | 15700 | 13300 | 14500 | 14800 | 15500 | 19200 | 13500 | 21300 | 746.4 | 2236.2 | 3      | 0.0206 | 9.212  |
|                                                                                    | Heterogeneous nuclear ribonucleoprotein A1 OS=Pan troglodytes GN=HNRNPA1 PE=2 SV=1                                                                                                                                                                                        | 4 ROA1_PANTR,sp P04256 ROA1_RA T,sp P09651 ROA1_HUMAN,sp P09867 ROA1_BOVIN,sp P49312 ROA1_MOUSE,transcript D4ACJ7 D4ACJ7_RA T,transcript E1BKB5 E1BKB5_BOVIN,transcript E2QYP1 E2QYP1_CANFA,transcript F1PP96 F1PP96_C ANFA,transcript F6Y244 F6YZ44_HO RSE,transcript F7 | sSGP YGG GGQ YFAK | PR  | 95% | 59       | 54.42312 | Ref    | -0.081 | -0.03 | -0.21 | -0.1 | 0.12  | -0.25 | 0.44  | 1600  | 1210  | 1360  | 1350  | 1600  | 1640  | 1330  | 2110  | 746.4  | 2236.2 | 3      | 0.0197 |

|                                                                        |                                                                                                                                                                                                                       |              |     |      |          |     |        |       |      |        |       |       |       |       |       |       |       |       |       |       |       |       |        |   |        |       |
|------------------------------------------------------------------------|-----------------------------------------------------------------------------------------------------------------------------------------------------------------------------------------------------------------------|--------------|-----|------|----------|-----|--------|-------|------|--------|-------|-------|-------|-------|-------|-------|-------|-------|-------|-------|-------|-------|--------|---|--------|-------|
| Nucleosome assembly protein 1-like 1 OS=Bos taurus GN=NAP1L1 PE=2 SV=1 | 7 NP1L1_BOVIN,sp P28656 NP1L1_MOUSE,sp P55209 NP1L1_HUMAN,sp Q5R4D4 NP1L1_PONAB,sp Q9Z2G8 NP1L1_RAT, tr B3KNT8 B3KNT8_HUMAN, tr B7Z2V4 B7Z2V4_HUMAN, tr B7Z9C2 B7Z9C2_HUMAN, tr E1BH W2 E1BH W2_BOVIN, tr E9P W66 E9P | fYEE VHD LER | 93% | 46.5 | 51.21937 | Ref | -0.091 | -0.51 | 0.28 | 0.091  | -0.04 | -0.36 | 0.026 | 36200 | 29200 | 23600 | 45900 | 44400 | 35500 | 29600 | 38400 | 547.6 | 1639.8 | 3 | 0.0145 | 8.812 |
| Nucleosome assembly protein 1-like 1 OS=Bos taurus GN=NAP1L1 PE=2 SV=1 | 7 NP1L1_BOVIN,sp P28656 NP1L1_MOUSE,sp P55209 NP1L1_HUMAN,sp Q5R4D4 NP1L1_PONAB,sp Q9Z2G8 NP1L1_RAT, tr B3KNT8 B3KNT8_HUMAN, tr B7Z2V4 B7Z2V4_HUMAN, tr B7Z9C2 B7Z9C2_HUMAN, tr E1BH W2 E1BH W2_BOVIN, tr E9P W66 E9P | fYEE VHD LER | 95% | 52.6 | 51.29084 | Ref | -0.045 | -0.2  | 0.12 | -0.089 | -0.01 | -0.23 | -0.02 | 6760  | 5740  | 5600  | 7840  | 7470  | 6910  | 6190  | 7110  | 820.9 | 1639.8 | 2 | 0.0127 | 7.718 |

|                                                                               |                                                                                                                                                                                                                         |                              |            |             |                 |            |               |              |              |              |              |              |              |            |            |            |            |            |            |            |            |            |               |          |               |              |
|-------------------------------------------------------------------------------|-------------------------------------------------------------------------------------------------------------------------------------------------------------------------------------------------------------------------|------------------------------|------------|-------------|-----------------|------------|---------------|--------------|--------------|--------------|--------------|--------------|--------------|------------|------------|------------|------------|------------|------------|------------|------------|------------|---------------|----------|---------------|--------------|
| <p>Nucleosome assembly protein 1-like 1 OS=Bos taurus GN=NAP1L1 PE=2 SV=1</p> | <p>7 NP1L1_BOVIN,sp P28656 NP1L1_MOUSE,sp P55209 NP1L1_HUMAN,sp Q5R4D4 NP1L1_PONAB,sp Q9Z2G8 NP1L1_RAT, tr B3KNT8 B3KNT8_HUMAN, tr B7Z2V4 B7Z2V4_HUMAN, tr B7Z9C2 B7Z9C2_HUMAN, tr E1BW2 E1BW2_BOVIN, tr E9PW66 E9P</p> | <p>gIPE<br/>FWL<br/>TVFK</p> | <p>83%</p> | <p>39.6</p> | <p>52.22865</p> | <p>Ref</p> | <p>-0.43</p>  | <p>0.026</p> | <p>0.29</p>  | <p>0.062</p> | <p>-0.14</p> | <p>-0.08</p> | <p>-0.17</p> | <p>241</p> | <p>166</p> | <p>247</p> | <p>333</p> | <p>314</p> | <p>239</p> | <p>259</p> | <p>242</p> | <p>649</p> | <p>1944.1</p> | <p>3</p> | <p>0.0082</p> | <p>4.234</p> |
| <p>Nucleosome assembly protein 1-like 1 OS=Bos taurus GN=NAP1L1 PE=2 SV=1</p> | <p>7 NP1L1_BOVIN,sp P28656 NP1L1_MOUSE,sp P55209 NP1L1_HUMAN,sp Q5R4D4 NP1L1_PONAB,sp Q9Z2G8 NP1L1_RAT, tr B3KNT8 B3KNT8_HUMAN, tr B7Z2V4 B7Z2V4_HUMAN, tr B7Z9C2 B7Z9C2_HUMAN, tr E1BW2 E1BW2_BOVIN, tr E9PW66 E9P</p> | <p>gIPE<br/>FWL<br/>TVFK</p> | <p>70%</p> | <p>35.7</p> | <p>52.43901</p> | <p>Ref</p> | <p>-0.059</p> | <p>-0.01</p> | <p>-0.23</p> | <p>0.043</p> | <p>-0.04</p> | <p>-0.47</p> | <p>-0.09</p> | <p>531</p> | <p>358</p> | <p>402</p> | <p>388</p> | <p>516</p> | <p>425</p> | <p>329</p> | <p>426</p> | <p>649</p> | <p>1944.1</p> | <p>3</p> | <p>0.0156</p> | <p>7.997</p> |



|                                                                        |                                                                                                                                                                                                                  |              |     |      |          |     |        |       |       |        |       |       |       |      |      |      |      |      |      |      |      |       |        |   |        |       |
|------------------------------------------------------------------------|------------------------------------------------------------------------------------------------------------------------------------------------------------------------------------------------------------------|--------------|-----|------|----------|-----|--------|-------|-------|--------|-------|-------|-------|------|------|------|------|------|------|------|------|-------|--------|---|--------|-------|
| Nucleosome assembly protein 1-like 1 OS=Bos taurus GN=NAP1L1 PE=2 SV=1 | 7 NP1L1_BOVIN,sp P28656 NP1L1_MOUSE,sp P55209 NP1L1_HUMAN,sp Q5R4D4 NP1L1_PONAB,sp Q9Z2G8 NP1L1_RAT,tr B3KNT8 B3KNT8_HUMAN,tr B7Z2V4 B7Z2V4_HUMAN,tr B7Z9C2 B7Z9C2_HUMAN,tr E1BH W2 E1BH W2_BOVIN,tr E9P W66 E9P | g PEFWLTVFK  | 78% | 37.5 | 51.95833 | Ref | -0.071 | 0.02  | 0.012 | -0.014 | -0.25 | -0.23 | -0.45 | 186  | 117  | 135  | 150  | 163  | 120  | 128  | 109  | 649.1 | 1944.1 | 3 | 0.0053 | 2.722 |
|                                                                        | 7 NP1L1_BOVIN,sp P28656 NP1L1_MOUSE,sp P55209 NP1L1_HUMAN,sp Q5R4D4 NP1L1_PONAB,sp Q9Z2G8 NP1L1_RAT,tr B3KNT8 B3KNT8_HUMAN,tr B7Z2V4 B7Z2V4_HUMAN,tr B7Z9C2 B7Z9C2_HUMAN,tr E1BH W2 E1BH W2_BOVIN,tr E9P W66 E9P | KYAVLYQPLFDK | 84% | 39.4 | 51.16272 | Ref | -0.16  | -0.33 | 0.21  | -0.036 | -0.08 | -0.17 | -0.23 | 1630 | 1060 | 1020 | 1660 | 1550 | 1310 | 1290 | 1220 | 799.8 | 2396.4 | 3 | 0.0186 | 7.76  |

|                                                                        |                                                                                                                                                                                                                        |              |     |      |          |     |        |       |       |       |       |       |       |      |      |      |      |      |      |      |      |       |        |   |        |       |
|------------------------------------------------------------------------|------------------------------------------------------------------------------------------------------------------------------------------------------------------------------------------------------------------------|--------------|-----|------|----------|-----|--------|-------|-------|-------|-------|-------|-------|------|------|------|------|------|------|------|------|-------|--------|---|--------|-------|
| Nucleosome assembly protein 1-like 1 OS=Bos taurus GN=NAP1L1 PE=2 SV=1 | 7 NP1L1_BOVIN,sp P28656 NP1L1_MOUSE,sp P55209 NP1L1_HUMAN,sp Q5R4D4 NP1L1_PONAB,sp Q9Z2G8 NP1L1_RAT, tr B3KN T8 B3KNT8_HUMAN, tr B7Z2V4 B7Z2V4_HUMAN, tr B7Z9C2 B7Z9C2_HUMAN, tr E1BH W2 E1BH W2_BOVIN, tr E9P W66 E9P | KYAVLYQPLFDK | 56% | 29   | 50.57609 | Ref | 0.038  | -0.2  | 0.006 | -0.12 | -0.05 | -0.17 | 0.095 | 1790 | 1680 | 1550 | 2000 | 2020 | 1850 | 1780 | 2120 | 600.1 | 2396.4 | 4 | 0.0089 | 3.721 |
| Nucleosome assembly protein 1-like 1 OS=Bos taurus GN=NAP1L1 PE=2 SV=1 | 7 NP1L1_BOVIN,sp P28656 NP1L1_MOUSE,sp P55209 NP1L1_HUMAN,sp Q5R4D4 NP1L1_PONAB,sp Q9Z2G8 NP1L1_RAT, tr B3KN T8 B3KNT8_HUMAN, tr B7Z2V4 B7Z2V4_HUMAN, tr B7Z9C2 B7Z9C2_HUMAN, tr E1BH W2 E1BH W2_BOVIN, tr E9P W66 E9P | KYAVLYQPLFDK | 59% | 30.2 | 51.16966 | Ref | -0.061 | -0.29 | 0.059 | -0.11 | -0.1  | 0.024 | 0.011 | 4220 | 3510 | 3250 | 4650 | 4560 | 4000 | 4560 | 4490 | 600.1 | 2396.4 | 4 | 0.0187 | 7.792 |

|                                                                        |                                                                                                                                                                                                                       |                      |     |      |          |     |       |       |       |        |      |       |       |       |      |      |       |       |       |       |       |       |        |   |        |       |
|------------------------------------------------------------------------|-----------------------------------------------------------------------------------------------------------------------------------------------------------------------------------------------------------------------|----------------------|-----|------|----------|-----|-------|-------|-------|--------|------|-------|-------|-------|------|------|-------|-------|-------|-------|-------|-------|--------|---|--------|-------|
| Nucleosome assembly protein 1-like 1 OS=Bos taurus GN=NAP1L1 PE=2 SV=1 | 7 NP1L1_BOVIN,sp P28656 NP1L1_MOUSE,sp P55209 NP1L1_HUMAN,sp Q5R4D4 NP1L1_PONAB,sp Q9Z2G8 NP1L1_RAT, tr B3KNT8 B3KNT8_HUMAN, tr B7Z2V4 B7Z2V4_HUMAN, tr B7Z9C2 B7Z9C2_HUMAN, tr E1BH W2 E1BH W2_BOVIN, tr E9P W66 E9P | KYAV<br>LYQP<br>LFDK | 79% | 36.3 | 50.43169 | Ref | 0.003 | -0.3  | 0.073 | -0.048 | -0.1 | -0.24 | -0.04 | 1460  | 1140 | 1010 | 1460  | 1480  | 1250  | 1190  | 1350  | 799.8 | 2396.4 | 3 | 0.0071 | 2.942 |
| Nucleosome assembly protein 1-like 1 OS=Bos taurus GN=NAP1L1 PE=2 SV=1 | 7 NP1L1_BOVIN,sp P28656 NP1L1_MOUSE,sp P55209 NP1L1_HUMAN,sp Q5R4D4 NP1L1_PONAB,sp Q9Z2G8 NP1L1_RAT, tr B3KNT8 B3KNT8_HUMAN, tr B7Z2V4 B7Z2V4_HUMAN, tr B7Z9C2 B7Z9C2_HUMAN, tr E1BH W2 E1BH W2_BOVIN, tr E9P W66 E9P | KYAV<br>LYQP<br>LFDK | 94% | 44.3 | 49.72384 | Ref | -0.28 | -0.41 | 0.26  | 0.008  | 0.03 | -0.19 | 0.18  | 10600 | 8510 | 8410 | 15100 | 13900 | 12400 | 11100 | 14300 | 639.1 | 2552.5 | 4 | 0.0126 | 4.932 |

|                                                                                       |                                                                                                                                                                                                                    |                           |     |      |          |     |        |       |      |        |       |       |       |       |       |       |        |       |       |       |        |       |        |   |        |       |
|---------------------------------------------------------------------------------------|--------------------------------------------------------------------------------------------------------------------------------------------------------------------------------------------------------------------|---------------------------|-----|------|----------|-----|--------|-------|------|--------|-------|-------|-------|-------|-------|-------|--------|-------|-------|-------|--------|-------|--------|---|--------|-------|
| Nucleosome assembly protein 1-like 1 OS=Bos taurus GN=NAP1L1 PE=2 SV=1                | 7 NP1L1_BOVIN,sp P28656 NP1L1_MOUSE,sp P55209 NP1L1_HUMAN,sp Q5R4D4 NP1L1_PONAB,sp Q9Z2G8 NP1L1_RAT, tr B3KNT8 B3KNT8_HUMAN, tr B7Z2V4 B7Z2V4_HUMAN, tr B7Z9C2 B7Z9C2_HUMAN, tr E1BHW2 E1BHW2_BOVIN, tr E9PW66 E9P | KYAV<br>LYQP<br>LFDK<br>R | 80% | 34.1 | 49.85355 | Ref | -0.083 | -0.38 | 0.3  | -0.005 | 0.054 | -0.19 | 0.084 | 3450  | 3610  | 3190  | 5740   | 5120  | 4660  | 4110  | 4930   | 639.1 | 2552.5 | 4 | 0.0136 | 5.308 |
| Uncharacterized protein (Fragment) OS=Monodelphis domestica GN=LOC100028564 PE=4 SV=1 | tr F7AJW2 F7AJW2_MONDELPHIS_DOMESTICA                                                                                                                                                                              | iVEM<br>STSk              | 78% | 36.8 | 52.19521 | Ref | 0.1    | -0.13 | 0.14 | -0.18  | 0.043 | -0.26 | -0.18 | 41700 | 38700 | 35700 | 48400  | 42700 | 43600 | 36900 | 38800  | 751.9 | 1501.8 | 2 | 0.0191 | 12.74 |
| Uncharacterized protein (Fragment) OS=Monodelphis domestica GN=LOC100028564 PE=4 SV=1 | tr F7AJW2 F7AJW2_MONDELPHIS_DOMESTICA                                                                                                                                                                              | iVEM<br>STSk              | 67% | 34.5 | 52.026   | Ref | -0.066 | -0.25 | 0.37 | -0.19  | 0.047 | -0.41 | 0.074 | 89200 | 80300 | 76500 | 132000 | 98800 | 1E+05 | 77400 | 108000 | 501.6 | 1501.9 | 3 | 0.0134 | 8.893 |

|                                                                                                |                        |                      |     |      |          |     |       |       |       |       |       |       |       |       |       |       |       |       |       |       |       |       |        |   |        |       |
|------------------------------------------------------------------------------------------------|------------------------|----------------------|-----|------|----------|-----|-------|-------|-------|-------|-------|-------|-------|-------|-------|-------|-------|-------|-------|-------|-------|-------|--------|---|--------|-------|
| Uncharacterized protein (Fragment)<br>OS=Monodelphis domestica<br>GN=LOC100028564<br>PE=4 SV=1 | tr F7AJW2 F7AJW2_MONDO | iVEM<br>STSk         | 89% | 41.2 | 52.05591 | Ref | 0.034 | -0.2  | 0.044 | 0.006 | 0.12  | -0.19 | -0.24 | 16000 | 14400 | 13300 | 17700 | 19000 | 17900 | 15100 | 14500 | 751.9 | 1501.9 | 2 | 0.0068 | 4.531 |
| Uncharacterized protein (Fragment)<br>OS=Monodelphis domestica<br>GN=LOC100028564<br>PE=4 SV=1 | tr F7AJW2 F7AJW2_MONDO | vHLV<br>GlnIF<br>TGk | 81% | 36.6 | 49.9029  | Ref | 0.068 | -0.37 | 0.12  | -0.11 | -0.28 | 0.09  | 0.045 | 17300 | 16300 | 13100 | 20600 | 19400 | 15000 | 20300 | 19500 | 636.4 | 1906.2 | 3 | 0.0016 | 0.814 |
| Uncharacterized protein (Fragment)<br>OS=Monodelphis domestica<br>GN=LOC100028564<br>PE=4 SV=1 | tr F7AJW2 F7AJW2_MONDO | vHLV<br>GlnIF<br>TGk | 95% | 63.9 | 50.61106 | Ref | 0.037 | -0.48 | -0.06 | -0.1  | 0.12  | -0.17 | 0.016 | 35700 | 28800 | 21900 | 32800 | 35200 | 35800 | 30500 | 34500 | 636.4 | 1906.1 | 3 | 0.0087 | 4.566 |
| Uncharacterized protein (Fragment)<br>OS=Monodelphis domestica<br>GN=LOC100028564<br>PE=4 SV=1 | tr F7AJW2 F7AJW2_MONDO | vHLV<br>GlnIF<br>TGk | 95% | 57.9 | 50.39497 | Ref | 0.08  | -0.23 | 0.016 | -0.05 | 0.1   | -0.32 | -0.06 | 2130  | 1960  | 1720  | 2280  | 2400  | 2330  | 1810  | 2160  | 954.1 | 1906.1 | 2 | 0.0063 | 3.32  |

|                                                                                                |                        |                      |     |      |          |     |        |       |       |       |       |       |       |      |      |     |      |      |      |      |      |       |        |   |        |       |
|------------------------------------------------------------------------------------------------|------------------------|----------------------|-----|------|----------|-----|--------|-------|-------|-------|-------|-------|-------|------|------|-----|------|------|------|------|------|-------|--------|---|--------|-------|
| Uncharacterized protein (Fragment)<br>OS=Monodelphis domestica<br>GN=LOC100028564<br>PE=4 SV=1 | tr F7AJW2 F7AJW2_MONDO | vHLV<br>GlnIF<br>TGk | 95% | 59.7 | 50.76181 | Ref | -7E-04 | -0.37 | 0.01  | -0.17 | 0.19  | -0.23 | 0.035 | 1050 | 885  | 745 | 1090 | 1060 | 1190 | 927  | 1100 | 954.1 | 1906.1 | 2 | 0.0118 | 6.194 |
| Uncharacterized protein (Fragment)<br>OS=Monodelphis domestica<br>GN=LOC100028564<br>PE=4 SV=1 | tr F7AJW2 F7AJW2_MONDO | vHLV<br>GlnIF<br>TGk | 94% | 47.6 | 50.65135 | Ref | -0.011 | -0.08 | -0.08 | 0.15  | -0.06 | -0.14 | -0.19 | 1040 | 916  | 951 | 1070 | 1380 | 1040 | 1030 | 981  | 636.4 | 1906.1 | 3 | 0.0098 | 5.148 |
| Uncharacterized protein (Fragment)<br>OS=Monodelphis domestica<br>GN=LOC100028564<br>PE=4 SV=1 | tr F7AJW2 F7AJW2_MONDO | vHLV<br>GlnIF<br>TGk | 95% | 55.9 | 50.44006 | Ref | 0.062  | -0.24 | 0.077 | -0.1  | -0.05 | -0.28 | -0.04 | 1220 | 1030 | 905 | 1270 | 1230 | 1120 | 996  | 1170 | 636.4 | 1906.1 | 3 | 0.0056 | 2.946 |
| Uncharacterized protein (Fragment)<br>OS=Monodelphis domestica<br>GN=LOC100028564<br>PE=4 SV=1 | tr F7AJW2 F7AJW2_MONDO | vHLV<br>GlnIF<br>TGk | 70% | 33.9 | 50.62003 | Ref | 0.1    | -0.37 | -0.23 | 0.018 | -0.32 | -0.12 | 0.1   | 388  | 299  | 234 | 289  | 378  | 261  | 313  | 363  | 636.4 | 1906.1 | 3 | 0.0095 | 4.959 |

|                                                                                                |                        |                      |     |      |          |     |       |       |       |        |      |       |       |       |       |       |       |       |       |       |       |       |        |   |        |       |
|------------------------------------------------------------------------------------------------|------------------------|----------------------|-----|------|----------|-----|-------|-------|-------|--------|------|-------|-------|-------|-------|-------|-------|-------|-------|-------|-------|-------|--------|---|--------|-------|
| Uncharacterized protein (Fragment)<br>OS=Monodelphis domestica<br>GN=LOC100028564<br>PE=4 SV=1 | tr F7AJW2 F7AJW2_MONDO | vHLV<br>GlnIF<br>TGk | 89% | 41.1 | 50.19722 | Ref | 0.23  | -0.02 | -0.05 | 0.008  | 0.15 | -0.43 | 0.026 | 194   | 275   | 252   | 276   | 317   | 306   | 214   | 291   | 636.4 | 1906.1 | 3 | 0.0023 | 1.216 |
| Uncharacterized protein (Fragment)<br>OS=Equus caballus<br>GN=Eca.8560 PE=4<br>SV=1            | tr F6ZN26 F6ZN26_HORSE | aGDL<br>LEDS<br>Pk   | 95% | 51.7 | 52.79347 | Ref | -0.43 | -0.16 | -0.14 | -0.034 | 0.34 | -0.52 | 0.096 | 8570  | 6120  | 8020  | 9110  | 10800 | 12200 | 7050  | 10700 | 827   | 1651.9 | 2 | 0.0182 | 10.99 |
| Uncharacterized protein (Fragment)<br>OS=Equus caballus<br>GN=Eca.8560 PE=4<br>SV=1            | tr F6ZN26 F6ZN26_HORSE | aSGY<br>QSS<br>Qk    | 73% | 36.3 | 52.85598 | Ref | -0.45 | -0.04 | -0.22 | -0.027 | 0.45 | -0.5  | -0.05 | 6770  | 4940  | 7120  | 7080  | 8920  | 10800 | 5880  | 7970  | 782.4 | 1562.8 | 2 | 0.0259 | 16.54 |
| Uncharacterized protein (Fragment)<br>OS=Equus caballus<br>GN=Eca.8560 PE=4<br>SV=1            | tr F6ZN26 F6ZN26_HORSE | eAE<br>DPE<br>GEEK   | 95% | 46.6 | 51.73574 | Ref | -0.41 | 0.14  | -0.14 | -0.21  | 0.31 | -0.47 | -0.29 | 17600 | 11000 | 17400 | 16200 | 16900 | 21200 | 12900 | 14500 | 870.9 | 1739.9 | 2 | 0.0129 | 7.42  |

|                                                                                     |                               |                                                    |     |      |          |     |       |       |       |        |      |       |       |       |       |       |        |        |       |       |        |       |        |   |        |       |
|-------------------------------------------------------------------------------------|-------------------------------|----------------------------------------------------|-----|------|----------|-----|-------|-------|-------|--------|------|-------|-------|-------|-------|-------|--------|--------|-------|-------|--------|-------|--------|---|--------|-------|
| Uncharacterized protein (Fragment)<br>OS=Equus caballus<br>GN=Eca.8560 PE=4<br>SV=1 | tr F6ZN26_1 F6ZN26_1<br>HORSE | gPP<br>QEEE<br>EEEE<br>EEEE<br>AKED<br>AEA<br>PGIR | 95% | 55.3 | 52.83186 | Ref | -0.6  | -0.14 | -0.27 | -0.016 | 0.2  | -0.3  | -0.07 | 5290  | 2630  | 3940  | 4040   | 5300   | 5390  | 3970  | 4630   | 877.2 | 3504.6 | 4 | 0.0326 | 9.301 |
| Uncharacterized protein (Fragment)<br>OS=Equus caballus<br>GN=Eca.8560 PE=4<br>SV=1 | tr F6ZN26_1 F6ZN26_1<br>HORSE | gPP<br>QEEE<br>EEEE<br>EEEE<br>AKED<br>AEA<br>PGIR | 92% | 45.3 | 53.05712 | Ref | -0.33 | 0.085 | 0.052 | -0.39  | 0.36 | -0.99 | -0    | 4720  | 3250  | 4690  | 5140   | 4160   | 6130  | 2520  | 4950   | 877.2 | 3504.6 | 4 | 0.0255 | 7.281 |
| Uncharacterized protein (Fragment)<br>OS=Equus caballus<br>GN=Eca.8560 PE=4<br>SV=1 | tr F6ZN26_1 F6ZN26_1<br>HORSE | iDE<br>MPE<br>AAV<br>k                             | 89% | 42.7 | 53.00034 | Ref | -0.4  | -0.1  | -0.12 | -0.18  | 0.38 | -0.56 | -0.02 | 46400 | 30700 | 41000 | 45500  | 48300  | 61900 | 33700 | 48800  | 856   | 1709.9 | 2 | 0.0184 | 10.76 |
| Uncharacterized protein (Fragment)<br>OS=Equus caballus<br>GN=Eca.8560 PE=4<br>SV=1 | tr F6ZN26_1 F6ZN26_1<br>HORSE | iDE<br>MPE<br>AAV<br>k                             | 86% | 42.3 | 53.02517 | Ref | -0.5  | -0.07 | -0.17 | 0.051  | 0.33 | -0.29 | -0.08 | 1E+05 | 72300 | 1E+05 | 111000 | 142000 | 2E+05 | 1E+05 | 117000 | 571   | 1709.9 | 3 | 0.0153 | 8.939 |
| Uncharacterized protein (Fragment)<br>OS=Equus caballus<br>GN=Eca.8560 PE=4<br>SV=1 | tr F6ZN26_1 F6ZN26_1<br>HORSE | kGFS<br>EGL<br>WEIE<br>NNP<br>TVk                  | 92% | 48.9 | 54.28964 | Ref | -0.36 | -0.18 | -0.01 | -0.2   | 0.33 | -0.3  | -0.09 | 1540  | 1130  | 1380  | 1750   | 1690   | 2130  | 1440  | 1660   | 954.2 | 2859.6 | 3 | 0.0134 | 4.672 |



|                                                                                     |                            |                                          |     |      |          |     |        |       |       |        |      |       |       |       |       |       |       |       |       |       |       |       |        |   |        |       |
|-------------------------------------------------------------------------------------|----------------------------|------------------------------------------|-----|------|----------|-----|--------|-------|-------|--------|------|-------|-------|-------|-------|-------|-------|-------|-------|-------|-------|-------|--------|---|--------|-------|
| Uncharacterized protein (Fragment)<br>OS=Equus caballus<br>GN=Eca.8560 PE=4<br>SV=1 | tr F6ZN26_1 F6ZN26_1_HORSE | kGFS<br>EGL<br>WEIE<br>NNP<br>TVK        | 67% | 37.1 | 54.57895 | Ref | -0.49  | -0.26 | -0.28 | -0.081 | 0.25 | -0.14 | -0.16 | 701   | 383   | 485   | 539   | 680   | 749   | 596   | 585   | 954.2 | 2859.6 | 3 | 0.0231 | 8.059 |
| Uncharacterized protein (Fragment)<br>OS=Equus caballus<br>GN=Eca.8560 PE=4<br>SV=1 | tr F6ZN26_2 F6ZN26_2_HORSE | sSVE<br>EPEP<br>EPEA<br>TEG<br>DGD<br>kk | 65% | 37.5 | 55.45374 | Ref | -0.62  | -0.02 | -0.1  | -0.15  | 0.42 | -0.46 | -0.32 | 9640  | 4890  | 8080  | 8540  | 9110  | 11800 | 6680  | 7340  | 1015  | 3041.5 | 3 | 0.015  | 4.936 |
| Uncharacterized protein OS=Bos taurus GN=ZYG PE=2 SV=1                              | tr Q08DQ6_1 Q08DQ6_1_BOVIN | aISV<br>SAPV<br>FYAP<br>Qk               | 95% | 64.5 | 52.61501 | Ref | -0.097 | 0.31  | 0.12  | -0.062 | 0.12 | 0.12  | 0.2   | 22700 | 18300 | 26300 | 25900 | 25100 | 24900 | 26000 | 27400 | 696.1 | 2085.2 | 3 | 0.0106 | 5.087 |
| Uncharacterized protein OS=Bos taurus GN=ZYG PE=2 SV=1                              | tr Q08DQ6_2 Q08DQ6_2_BOVIN | aISV<br>SAPV<br>FYAP<br>Qk               | 95% | 66.1 | 52.88612 | Ref | -0.025 | 0.36  | 0.15  | -0.2   | 0.15 | -0.05 | 0.31  | 10300 | 8880  | 12600 | 12200 | 10600 | 11700 | 10700 | 13600 | 696.1 | 2085.2 | 3 | 0.0168 | 8.063 |
| Uncharacterized protein OS=Bos taurus GN=ZYG PE=2 SV=1                              | tr Q08DQ6_3 Q08DQ6_3_BOVIN | aISV<br>SAPV<br>FYAP<br>Qkk              | 92% | 44.7 | 50.11689 | Ref | -0.28  | 0.099 | -0.03 | 0.1    | 0.51 | -0.06 | 0.31  | 2880  | 2090  | 2940  | 3020  | 3650  | 4220  | 2970  | 3820  | 840.2 | 2517.5 | 3 | 0.0183 | 7.26  |
| Uncharacterized protein OS=Bos taurus GN=ZYG PE=2 SV=1                              | tr Q08DQ6_4 Q08DQ6_4_BOVIN | aISV<br>SAPV<br>FYAP<br>Qkk              | 65% | 30.4 | 50.19482 | Ref | -0.32  | -0.06 | 0.035 | 0.29   | 0.23 | 0.22  | 0.31  | 5650  | 4060  | 5260  | 6300  | 8270  | 6940  | 7190  | 7600  | 630.4 | 2517.5 | 4 | 0.0194 | 7.703 |

|                                                        |                        |                       |     |      |          |     |        |       |       |       |      |       |       |       |       |       |       |       |       |       |       |       |        |   |        |       |
|--------------------------------------------------------|------------------------|-----------------------|-----|------|----------|-----|--------|-------|-------|-------|------|-------|-------|-------|-------|-------|-------|-------|-------|-------|-------|-------|--------|---|--------|-------|
| Uncharacterized protein OS=Bos taurus GN=ZYG PE=2 SV=1 | tr Q08DQ6 Q08DQ6_BOVIN | a SV SAPV FYAP Qkk    | 95% | 64.5 | 49.49493 | Ref | -0.096 | 0.073 | 0.11  | 0.074 | 0.48 | 0.074 | 0.18  | 2190  | 2080  | 2530  | 2910  | 3140  | 3640  | 2860  | 3050  | 840.2 | 2517.5 | 3 | 0.0088 | 3.484 |
| Uncharacterized protein OS=Bos taurus GN=ZYG PE=2 SV=1 | tr Q08DQ6 Q08DQ6_BOVIN | e VEE LEQL TQk        | 75% | 38.3 | 53.73927 | Ref | 0.089  | -0.06 | 0.024 | 0.17  | 0.24 | 0.16  | -0.08 | 13900 | 11200 | 11000 | 13100 | 16000 | 14600 | 14500 | 12100 | 652   | 1953.1 | 3 | 0.0123 | 6.276 |
| Uncharacterized protein OS=Bos taurus GN=ZYG PE=2 SV=1 | tr Q08DQ6 Q08DQ6_BOVIN | f SPG APG GPG SQP HQk | 92% | 48.3 | 54.1898  | Ref | 0.23   | -0.34 | 0.3   | -0.16 | 0.49 | -0.4  | 0.5   | 9720  | 11100 | 8180  | 14300 | 11400 | 15700 | 8820  | 16300 | 719.7 | 2156.1 | 3 | 0.0147 | 6.808 |
| Uncharacterized protein OS=Bos taurus GN=ZYG PE=2 SV=1 | tr Q08DQ6 Q08DQ6_BOVIN | g PLA PSPA Pk         | 84% | 36.7 | 49.72883 | Ref | 0.064  | 0.26  | -0.67 | 0.23  | 0.48 | 0.07  | -0.54 | 14900 | 9760  | 12100 | 7130  | 14700 | 15300 | 12000 | 7820  | 772   | 1541.9 | 2 | 0.0097 | 6.308 |
| Uncharacterized protein OS=Bos taurus GN=ZYG PE=2 SV=1 | tr Q08DQ6 Q08DQ6_BOVIN | k FAP VVA PkPk        | 91% | 30.4 | 37.11976 | Ref | -0.037 | -0.04 | -0.05 | 0.17  | 0.53 | -0.2  | 0.092 | 6480  | 4830  | 5210  | 5820  | 7470  | 8390  | 5280  | 6410  | 800.2 | 2397.6 | 3 | 0.0015 | 0.618 |
| Uncharacterized protein OS=Bos taurus GN=ZYG PE=2 SV=1 | tr Q08DQ6 Q08DQ6_BOVIN | v VAL Dk              | 65% | 30.5 | 48.4988  | Ref | -0.002 | -0    | 0.043 | 0.13  | 0.21 | -0.05 | 0.12  | 54100 | 38200 | 41400 | 48000 | 56100 | 52000 | 45300 | 50500 | 418.3 | 1251.8 | 3 | 0.0054 | 4.308 |

|                                                             |                                                  |                           |     |      |          |     |                            |       |       |        |       |       |       |       |                            |       |       |       |       |       |       |       |        |   |        |       |
|-------------------------------------------------------------|--------------------------------------------------|---------------------------|-----|------|----------|-----|----------------------------|-------|-------|--------|-------|-------|-------|-------|----------------------------|-------|-------|-------|-------|-------|-------|-------|--------|---|--------|-------|
| Uncharacterized protein OS=Bos taurus GN=Bt.77209 PE=4 SV=1 | tr F1MYS7 F1MYS7_BOVIN, tr Q3MH P6 Q3MH P6_BOVIN | aRPA ADSF DDY PPR         | 74% | 36.3 | 52.20189 | Ref | 0.32                       | 0.15  | -0.08 | -0.12  | 0.019 | -0.33 | 0.091 | 10100 | 11600                      | 11200 | 10700 | 11400 | 11000 | 9020  | 12000 | 628   | 1880.9 | 3 | 0.0126 | 6.709 |
| Uncharacterized protein OS=Bos taurus GN=Bt.77209 PE=4 SV=1 | tr F1MYS7 F1MYS7_BOVIN, tr Q3MH P6 Q3MH P6_BOVIN | eDD SSAS TSQS SR          | 78% | 31.2 | 46.42316 | Ref | -0.17                      | -0.25 | 0.17  | -0.25  | 0.43  | -0.43 | 0.11  | 1430  | 931                        | 957   | 1440  | 1190  | 1660  | 951   | 1370  | 830.9 | 1659.7 | 2 | 0.0168 | 10.13 |
| Uncharacterized protein OS=Bos taurus GN=Bt.77209 PE=4 SV=1 | tr F1MYS7 F1MYS7_BOVIN, tr Q3MH P6 Q3MH P6_BOVIN | eREV EER                  | 76% | 35.3 | 50.5327  | Ref | -0.62                      | 0.15  | 0.28  | -0.17  | 0.47  | -0.45 | 0.16  | 32300 | 19400                      | 36000 | 44000 | 35600 | 48600 | 26800 | 40600 | 417.6 | 1249.6 | 3 | 0.0099 | 7.884 |
| Uncharacterized protein OS=Bos taurus GN=Bt.77209 PE=4 SV=1 | tr F1MYS7 F1MYS7_BOVIN, tr Q3MH P6 Q3MH P6_BOVIN | eRSR TGSE SSQT GTS ATS GR | 89% | 42.1 | 52.90278 | Ref | Value Missing (-1.0683267) | 0.36  | 0.092 | -0.34  | 0.26  | -0.11 | 0.36  | 139   | Value Missing (-1.0683267) | 166   | 154   | 126   | 167   | 135   | 185   | 587.3 | 2345.1 | 4 | 0.0145 | 6.188 |
| Uncharacterized protein OS=Bos taurus GN=Bt.77209 PE=4 SV=1 | tr F1MYS7 F1MYS7_BOVIN, tr Q3MH P6 Q3MH P6_BOVIN | sQSS DTE QQS PTSG GKG     | 95% | 53.1 | 53.06948 | Ref | -0.47                      | -0.28 | 0.24  | -0.099 | 0.55  | -0.81 | 0.28  | 2380  | 1300                       | 1610  | 2590  | 2260  | 3090  | 1260  | 2650  | 1145  | 2288.1 | 2 | 0.0195 | 8.519 |
| Uncharacterized protein OS=Bos taurus GN=Bt.77209 PE=4 SV=1 | tr F1MYS7 F1MYS7_BOVIN, tr Q3MH P6 Q3MH P6_BOVIN | sQSS DTE QQS PTSG GKG     | 95% | 62.1 | 53.09193 | Ref | -0.29                      | -0.25 | -0.08 | -0.024 | 0.73  | -0.62 | 0.1   | 4140  | 2740                       | 3060  | 3870  | 4430  | 6530  | 2670  | 4370  | 763.7 | 2288.1 | 3 | 0.0192 | 8.369 |

|                                                             |                                                  |                        |     |      |          |     |        |       |       |       |       |       |       |       |       |       |       |       |       |       |       |       |        |   |        |       |
|-------------------------------------------------------------|--------------------------------------------------|------------------------|-----|------|----------|-----|--------|-------|-------|-------|-------|-------|-------|-------|-------|-------|-------|-------|-------|-------|-------|-------|--------|---|--------|-------|
| Uncharacterized protein OS=Bos taurus GN=Bt.77209 PE=4 SV=1 | tr F1MYS7 F1MYS7_BOVIN, tr Q3MH P6 Q3MH P6_BOVIN | sQSS DTEq QSPT SGG Gk  | 95% | 57.4 | 52.5486  | Ref | -0.22  | 0.12  | 0.073 | -0.18 | 0.27  | -0.47 | 0.32  | 1350  | 1030  | 1410  | 1530  | 1420  | 1690  | 1060  | 1820  | 764   | 2289.1 | 3 | 0.0211 | 9.221 |
| Uncharacterized protein OS=Bos taurus GN=Bt.77209 PE=4 SV=1 | tr F1MYS7 F1MYS7_BOVIN, tr Q3MH P6 Q3MH P6_BOVIN | sTPk EDD SSAS TSQS SR  | 89% | 45.1 | 53.54172 | Ref | -0.39  | -0.29 | 0.008 | 0.13  | 0.67  | -0.72 | 0.4   | 6550  | 5160  | 5990  | 8250  | 9910  | 12500 | 5000  | 10800 | 793.4 | 2377.2 | 3 | 0.0162 | 6.801 |
| Uncharacterized protein OS=Bos taurus GN=Bt.77209 PE=4 SV=1 | tr F1MYS7 F1MYS7_BOVIN, tr Q3MH P6 Q3MH P6_BOVIN | sTPk EDD SSAS TSQS SR  | 83% | 40.7 | 53.40141 | Ref | -0.71  | -0.37 | 0.23  | 0.15  | 0.64  | -0.48 | 0.33  | 3510  | 2240  | 3070  | 5220  | 5440  | 6640  | 3210  | 5590  | 793.4 | 2377.2 | 3 | 0.0229 | 9.64  |
| Uncharacterized protein OS=Bos taurus GN=Bt.77209 PE=4 SV=1 | tr F1MYS7 F1MYS7_BOVIN, tr Q3MH P6 Q3MH P6_BOVIN | tGSE SSQT GTS ATS GR   | 95% | 60.4 | 50.574   | Ref | -0.058 | -0.4  | 0.014 | -0.03 | 0.43  | -0.47 | 0.091 | 1030  | 717   | 612   | 918   | 981   | 1180  | 659   | 966   | 909.4 | 1816.9 | 2 | 0.0101 | 5.561 |
| Reticulocalbin-3 OS=Bos taurus GN=RCN3 PE=2 SV=1            | sp Q2KJ39 RCN3_BOVIN                             | dIVI AETL EDLD R       | 95% | 53.6 | 53.27625 | Ref | -0.41  | 0.68  | -0.14 | 0.13  | 0.025 | 0.25  | -0.19 | 4350  | 2700  | 6240  | 3970  | 5250  | 4270  | 5230  | 3820  | 903.5 | 1805   | 2 | 0.0194 | 10.73 |
| Reticulocalbin-3 OS=Bos taurus GN=RCN3 PE=2 SV=1            | sp Q2KJ39 RCN3_BOVIN                             | dIVI AETL EDLD R       | 95% | 51.9 | 53.32859 | Ref | -0.54  | 0.8   | -0.13 | 0.031 | -0.08 | 0.23  | -0.02 | 991   | 572   | 1570  | 928   | 1150  | 928   | 1200  | 1000  | 903.5 | 1805   | 2 | 0.0127 | 7.011 |
| Reticulocalbin-3 OS=Bos taurus GN=RCN3 PE=2 SV=1            | sp Q2KJ39 RCN3_BOVIN                             | dSVS AAW NTY DTD RDG R | 82% | 37.1 | 50.04343 | Ref | -0.31  | 0.62  | -0.34 | 0.26  | 0.008 | 0.39  | -0.12 | 26500 | 19900 | 41100 | 23700 | 39500 | 29000 | 39500 | 27600 | 745   | 2232   | 3 | 0.016  | 7.186 |

|                                                           |                              |                                   |     |      |          |     |        |      |       |        |       |       |       |       |       |       |       |       |       |       |       |       |        |   |        |       |
|-----------------------------------------------------------|------------------------------|-----------------------------------|-----|------|----------|-----|--------|------|-------|--------|-------|-------|-------|-------|-------|-------|-------|-------|-------|-------|-------|-------|--------|---|--------|-------|
| Reticulocalbin-3<br>OS=Bos taurus<br>GN=RCN3 PE=2<br>SV=1 | sp Q2KJ3<br>9 RCN3_<br>BOVIN | eELT<br>AFLH<br>PEEF<br>PHM<br>R  | 90% | 46   | 53.62143 | Ref | 0.0068 | 0.41 | -0.25 | 0.22   | -0.12 | 0.11  | 0.26  | 1150  | 1040  | 1490  | 1060  | 1620  | 1110  | 1370  | 1500  | 763.1 | 2286.1 | 3 | 0.0074 | 3.224 |
| Reticulocalbin-3<br>OS=Bos taurus<br>GN=RCN3 PE=2<br>SV=1 | sp Q2KJ3<br>9 RCN3_<br>BOVIN | eELT<br>AFLH<br>PEEF<br>PHM<br>R  | 91% | 46.6 | 53.44447 | Ref | 0.13   | 0.31 | -0.01 | -0.033 | -0.08 | 0.32  | 0.057 | 798   | 794   | 978   | 874   | 950   | 802   | 1110  | 916   | 763   | 2286.1 | 3 | 0.0158 | 6.91  |
| Reticulocalbin-3<br>OS=Bos taurus<br>GN=RCN3 PE=2<br>SV=1 | sp Q2KJ3<br>9 RCN3_<br>BOVIN | eELT<br>AFLH<br>PEEF<br>PHm<br>R  | 79% | 37.2 | 53.15706 | Ref | 0.43   | 0.51 | -0.09 | -0.18  | -0.04 | -0.03 | 0.005 | 5110  | 6310  | 7230  | 5350  | 5540  | 5340  | 5620  | 5700  | 576.5 | 2302.1 | 4 | 0.0177 | 7.677 |
| Reticulocalbin-3<br>OS=Bos taurus<br>GN=RCN3 PE=2<br>SV=1 | sp Q2KJ3<br>9 RCN3_<br>BOVIN | eFD<br>QLTP<br>EESQ<br>AR         | 92% | 43.1 | 51.48827 | Ref | -0.42  | 0.67 | -0.33 | 0.089  | -0    | 0.22  | -0.14 | 16300 | 8670  | 20100 | 11300 | 16600 | 13600 | 16600 | 12800 | 927.5 | 1852.9 | 2 | 0.014  | 7.56  |
| Reticulocalbin-3<br>OS=Bos taurus<br>GN=RCN3 PE=2<br>SV=1 | sp Q2KJ3<br>9 RCN3_<br>BOVIN | eVAk<br>EFD<br>QLTP<br>EESQ<br>AR | 52% | 34.6 | 54.95316 | Ref | -0.34  | 0.46 | -0.06 | 0.26   | 0.16  | 0.13  | 0.095 | 2800  | 2130  | 4040  | 3160  | 4350  | 3540  | 3610  | 3510  | 862.5 | 2584.3 | 3 | 0.0278 | 10.76 |
| Reticulocalbin-3<br>OS=Bos taurus<br>GN=RCN3 PE=2<br>SV=1 | sp Q2KJ3<br>9 RCN3_<br>BOVIN | vAD<br>QDG<br>DSM<br>ATR          | 94% | 42.5 | 48.53692 | Ref | -0.55  | 0.76 | -0.3  | 0.2    | -0.11 | 0.35  | -0.19 | 62300 | 33900 | 91300 | 49200 | 76500 | 54100 | 77500 | 53000 | 785.4 | 1568.7 | 2 | 0.0123 | 7.841 |
| Reticulocalbin-3<br>OS=Bos taurus<br>GN=RCN3 PE=2<br>SV=1 | sp Q2KJ3<br>9 RCN3_<br>BOVIN | vAD<br>QDG<br>DSm<br>ATR          | 73% | 31.2 | 47.7805  | Ref | -0.55  | 0.81 | -0.11 | 0.12   | -0.07 | 0.2   | -0.22 | 8170  | 4450  | 12400 | 7330  | 9470  | 7280  | 9140  | 6800  | 793.4 | 1584.7 | 2 | 0.0113 | 7.14  |

|                                                                         |                                                                    |                                 |     |      |          |     |        |       |       |        |       |       |       |       |       |       |       |       |       |       |       |       |        |   |        |       |
|-------------------------------------------------------------------------|--------------------------------------------------------------------|---------------------------------|-----|------|----------|-----|--------|-------|-------|--------|-------|-------|-------|-------|-------|-------|-------|-------|-------|-------|-------|-------|--------|---|--------|-------|
| Nuclear migration protein nudC<br>OS=Bos taurus<br>GN=NUDC PE=2<br>SV=1 | sp Q17QG2 NUDC_BOVIN,tri E2QTG9 E2QTG9_CANFA,tri F1STR6 F1STR6_PIG | fMD<br>QHP<br>EMD<br>FSk        | 75% | 36.8 | 52.17968 | Ref | -0.064 | -0.42 | 0.005 | -0.078 | 0.092 | -0.18 | -0.03 | 14000 | 12700 | 10800 | 16200 | 16900 | 16600 | 14300 | 15800 | 707.3 | 2119   | 3 | 0.0124 | 5.872 |
| Nuclear migration protein nudC<br>OS=Bos taurus<br>GN=NUDC PE=2<br>SV=1 | sp Q17QG2 NUDC_BOVIN,tri E2QTG9 E2QTG9_CANFA,tri F1STR6 F1STR6_PIG | kTDF<br>FVG<br>GEE<br>GMA<br>Ek | 89% | 46.3 | 55.14136 | Ref | -0.11  | -0.36 | 0.025 | -0.11  | 0.12  | -0.34 | -0.01 | 4840  | 3980  | 3650  | 5350  | 5380  | 5490  | 4180  | 5200  | 853.1 | 2556.3 | 3 | 0.0335 | 13.09 |
| Nuclear migration protein nudC<br>OS=Bos taurus<br>GN=NUDC PE=2<br>SV=1 | sp Q17QG2 NUDC_BOVIN,tri E2QTG9 E2QTG9_CANFA,tri F1STR6 F1STR6_PIG | lITQT<br>FNH<br>HNQ<br>LAQk     | 58% | 33   | 54.24297 | Ref | 0.0033 | -0.25 | -0.05 | -0.26  | -0.12 | -0.03 | 0.086 | 10400 | 10100 | 9170  | 11800 | 11300 | 10900 | 12100 | 13000 | 601.1 | 2400.3 | 4 | 0.0282 | 11.75 |
| Nuclear migration protein nudC<br>OS=Bos taurus<br>GN=NUDC PE=2<br>SV=1 | sp Q17QG2 NUDC_BOVIN,tri E2QTG9 E2QTG9_CANFA,tri F1STR6 F1STR6_PIG | lITQT<br>FNH<br>HNQ<br>LAQk     | 87% | 43.3 | 53.56099 | Ref | 0.12   | -0.4  | -0.03 | -0.13  | -0.03 | -0.32 | -0.05 | 1750  | 1640  | 1240  | 1790  | 1840  | 1720  | 1470  | 1770  | 801.1 | 2400.3 | 3 | 0.0031 | 1.29  |
| Nuclear migration protein nudC<br>OS=Bos taurus<br>GN=NUDC PE=2<br>SV=1 | sp Q17QG2 NUDC_BOVIN,tri E2QTG9 E2QTG9_CANFA,tri F1STR6 F1STR6_PIG | lITQT<br>FnH<br>HNQ<br>LAQk     | 87% | 44.3 | 54.26675 | Ref | 0.056  | -0.19 | 0.11  | -0.2   | -0.12 | -0.22 | -0.07 | 3270  | 3310  | 3030  | 4180  | 3730  | 3430  | 3350  | 3680  | 801.4 | 2401.3 | 3 | 0.0131 | 5.438 |
| Nuclear migration protein nudC<br>OS=Bos taurus<br>GN=NUDC PE=2<br>SV=1 | sp Q17QG2 NUDC_BOVIN,tri E2QTG9 E2QTG9_CANFA,tri F1STR6 F1STR6_PIG | lVSS<br>DPEI<br>NTk             | 60% | 34.3 | 53.59655 | Ref | -0.048 | -0.43 | 0.17  | -0.2   | 0.2   | -0.61 | -0.09 | 19200 | 15500 | 13000 | 22100 | 18800 | 21600 | 12900 | 18400 | 906   | 1810   | 2 | 0.0155 | 8.542 |

|                                                                         |                                                                    |                            |     |      |          |     |        |       |       |       |       |       |       |       |       |       |       |       |       |       |       |       |        |   |        |       |
|-------------------------------------------------------------------------|--------------------------------------------------------------------|----------------------------|-----|------|----------|-----|--------|-------|-------|-------|-------|-------|-------|-------|-------|-------|-------|-------|-------|-------|-------|-------|--------|---|--------|-------|
| Nuclear migration protein nudC<br>OS=Bos taurus<br>GN=NUDC PE=2<br>SV=1 | sp Q17QG2 NUDC_BOVIN,tri E2QTG9 E2QTG9_CANFA,tri F1STR6 F1STR6_PIG | sETS<br>GPQIk              | 84% | 39.3 | 52.65919 | Ref | -0.18  | -0.28 | 0.12  | -0.17 | 0.27  | -0.58 | -0.07 | 26700 | 20800 | 21100 | 31200 | 28100 | 33200 | 19300 | 27300 | 777.9 | 1553.9 | 2 | 0.0232 | 14.9  |
| Nuclear migration protein nudC<br>OS=Bos taurus<br>GN=NUDC PE=2<br>SV=1 | sp Q17QG2 NUDC_BOVIN,tri E2QTG9 E2QTG9_CANFA,tri F1STR6 F1STR6_PIG | sETS<br>GPQIk              | 94% | 45.6 | 52.3373  | Ref | -0.076 | -0.33 | 0.093 | -0.13 | 0.1   | -0.68 | -0.03 | 4830  | 3640  | 3320  | 4980  | 4690  | 4840  | 2940  | 4560  | 777.9 | 1553.9 | 2 | 0.0091 | 5.875 |
| Nuclear migration protein nudC<br>OS=Bos taurus<br>GN=NUDC PE=2<br>SV=1 | sp Q17QG2 NUDC_BOVIN,tri E2QTG9 E2QTG9_CANFA,tri F1STR6 F1STR6_PIG | tDFF<br>VGG<br>EEG<br>MAEk | 95% | 55.2 | 52.9985  | Ref | -0.13  | -0.09 | 0.017 | -0.26 | -0.03 | -0.43 | -0.03 | 8160  | 5980  | 6680  | 8050  | 7300  | 7490  | 5940  | 7790  | 709   | 2124   | 3 | 0.0204 | 9.618 |
| Nuclear migration protein nudC<br>OS=Bos taurus<br>GN=NUDC PE=2<br>SV=1 | sp Q17QG2 NUDC_BOVIN,tri E2QTG9 E2QTG9_CANFA,tri F1STR6 F1STR6_PIG | tDFF<br>VGG<br>EEG<br>MAEk | 87% | 43.3 | 53.3236  | Ref | -0.07  | -0.14 | -0.06 | -0.28 | 0.04  | -0.34 | -0.05 | 6800  | 5280  | 5450  | 6480  | 6120  | 6670  | 5360  | 6520  | 709   | 2124.1 | 3 | 0.0091 | 4.267 |

|                                                                                    |                                                                                                                                                                                                                                                |                                                                                                                                                                                                                                                |             |      |          |          |       |       |       |       |       |       |       |       |        |       |        |        |       |       |        |       |        |        |        |        |
|------------------------------------------------------------------------------------|------------------------------------------------------------------------------------------------------------------------------------------------------------------------------------------------------------------------------------------------|------------------------------------------------------------------------------------------------------------------------------------------------------------------------------------------------------------------------------------------------|-------------|------|----------|----------|-------|-------|-------|-------|-------|-------|-------|-------|--------|-------|--------|--------|-------|-------|--------|-------|--------|--------|--------|--------|
| Serine/arginine-rich splicing factor 1<br>OS=Homo sapiens<br>GN=SRSF1 PE=1<br>SV=2 | 5 SRSF1_ HUMAN,s p Q0VCY 7 SRSF1_ BOVIN,sp  Q3YLA6  SRSF1_PI G,sp Q5R 7H2 SRSF 1_PONAB, sp Q6PD M2 SRSF 1_MOUSE ,tr D4A9L 2 D4A9L2 _RAT,tr E 2RIL3 E2 RIL3_CAN FA,tr F6R 520 F6R5 20_MAC MU,tr F6 YHN4 F6Y HN4_HOR SE,tr F7J0 L2 F7JOL2 _CRIGR | DAE DAV YGR                                                                                                                                                                                                                                    | 66%         | 30.9 | 49.11232 | Ref      | 0.038 | -0.07 | -0.17 | -0.26 | -0.01 | -0.19 | -0.13 | 1E+05 | 123000 | 1E+05 | 129000 | 133000 | 1E+05 | 1E+05 | 133000 | 650.3 | 1298.6 | 2      | 0.0105 | 8.06   |
|                                                                                    | Serine/arginine-rich splicing factor 1<br>OS=Homo sapiens<br>GN=SRSF1 PE=1<br>SV=2                                                                                                                                                             | 5 SRSF1_ HUMAN,s p Q0VCY 7 SRSF1_ BOVIN,sp  Q3YLA6  SRSF1_PI G,sp Q5R 7H2 SRSF 1_PONAB, sp Q6PD M2 SRSF 1_MOUSE ,tr D4A9L 2 D4A9L2 _RAT,tr E 2RIL3 E2 RIL3_CAN FA,tr F6R 520 F6R5 20_MAC MU,tr F6 YHN4 F6Y HN4_HOR SE,tr F7J0 L2 F7JOL2 _CRIGR | dGY DYD GYR | 59%  | 26.1     | 45.49677 | Ref   | -0.15 | 0.009 | -0.07 | -0.28 | 0.17  | -0.37 | 0.066 | 28500  | 24400 | 29500  | 31500  | 29800 | 35600 | 25600  | 34400 | 714.3  | 1426.6 | 2      | 0.0088 |



|                                                                                    |                                                                                                                                                                                                                                |                          |     |      |          |     |        |       |       |       |      |       |      |       |       |       |       |       |       |       |       |       |        |   |        |       |
|------------------------------------------------------------------------------------|--------------------------------------------------------------------------------------------------------------------------------------------------------------------------------------------------------------------------------|--------------------------|-----|------|----------|-----|--------|-------|-------|-------|------|-------|------|-------|-------|-------|-------|-------|-------|-------|-------|-------|--------|---|--------|-------|
| Serine/arginine-rich splicing factor 1<br>OS=Homo sapiens<br>GN=SRSF1 PE=1<br>SV=2 | 5 SRSF1_HUMAN,sp Q0VCY7 SRSF1_BOVIN,sp Q3YLA6 SRSF1_PI G,sp Q5R7H2 SRSF1_PONAB,sp Q6PD M2 SRSF1_MOUSE, tr D4A9L2 D4A9L2_RAT, tr E2RIL3 E2RIL3_CAN FA, tr F6R520 F6R520_MAC MU, tr F6YHN4 F6YHN4_HOR SE, tr F7J0L2 F7J0L2_CRIGR | dGY<br>DYD<br>GYR        | 82% | 31   | 45.14933 | Ref | -0.23  | -0.07 | -0.08 | -0.18 | 0.18 | -0.43 | 0.16 | 11300 | 9080  | 11000 | 12300 | 12600 | 14100 | 9680  | 14400 | 714.3 | 1426.6 | 2 | 0.0119 | 8.366 |
|                                                                                    | 5 SRSF1_HUMAN,sp Q0VCY7 SRSF1_BOVIN,sp Q3YLA6 SRSF1_PI G,sp Q5R7H2 SRSF1_PONAB,sp Q6PD M2 SRSF1_MOUSE, tr D4A9L2 D4A9L2_RAT, tr E2RIL3 E2RIL3_CAN FA, tr F6R520 F6R520_MAC MU, tr F6YHN4 F6YHN4_HOR SE, tr F7J0L2 F7J0L2_CRIGR | eAG<br>DVcY<br>ADV<br>YR | 94% | 41.5 | 47.18876 | Ref | -0.032 | -0.14 | -0.23 | -0.45 | 0.18 | -0.3  | 0.28 | 15800 | 14800 | 14900 | 15700 | 14900 | 20000 | 15100 | 22400 | 855.9 | 1709.8 | 2 | 0.0122 | 7.117 |

|                                                                                    |                                                                                                                                                                                                                                |                          |     |      |          |     |       |       |       |       |       |       |      |       |       |       |       |       |       |       |       |       |        |   |        |       |
|------------------------------------------------------------------------------------|--------------------------------------------------------------------------------------------------------------------------------------------------------------------------------------------------------------------------------|--------------------------|-----|------|----------|-----|-------|-------|-------|-------|-------|-------|------|-------|-------|-------|-------|-------|-------|-------|-------|-------|--------|---|--------|-------|
| Serine/arginine-rich splicing factor 1<br>OS=Homo sapiens<br>GN=SRSF1 PE=1<br>SV=2 | 5 SRSF1_HUMAN,sp Q0VCY7 SRSF1_BOVIN,sp Q3YLA6 SRSF1_PI G,sp Q5R7H2 SRSF1_PONAB,sp Q6PD M2 SRSF1_MOUSE, tr D4A9L2 D4A9L2_RAT, tr E2RIL3 E2RIL3_CAN FA, tr F6R520 F6R520_MAC MU, tr F6YHN4 F6YHN4_HOR SE, tr F7J0L2 F7J0L2_CRIGR | eAG<br>DVCY<br>ADV<br>YR | 56% | 27.7 | 47.37463 | Ref | -0.46 | -0    | -0.24 | -0.46 | -0.07 | 0.12  | 0.56 | 11800 | 10200 | 15300 | 14600 | 13800 | 15700 | 18700 | 25300 | 570.9 | 1709.8 | 3 | 0.0099 | 5.764 |
| Serine/arginine-rich splicing factor 1<br>OS=Homo sapiens<br>GN=SRSF1 PE=1<br>SV=2 | 5 SRSF1_HUMAN,sp Q0VCY7 SRSF1_BOVIN,sp Q3YLA6 SRSF1_PI G,sp Q5R7H2 SRSF1_PONAB,sp Q6PD M2 SRSF1_MOUSE, tr D4A9L2 D4A9L2_RAT, tr E2RIL3 E2RIL3_CAN FA, tr F6R520 F6R520_MAC MU, tr F6YHN4 F6YHN4_HOR SE, tr F7J0L2 F7J0L2_CRIGR | gPA<br>GNN<br>DcR        | 90% | 34.7 | 44.3183  | Ref | -0.14 | -0.15 | -0.25 | -0.35 | 0.2   | -0.45 | 0.13 | 28700 | 20100 | 21700 | 22700 | 23200 | 29700 | 19900 | 29400 | 627.3 | 1252.5 | 2 | 0.0134 | 10.68 |

|                                                                                    |                                                                                                                                                                                                                                                |                     |     |      |          |     |       |       |       |       |      |       |       |       |       |       |       |       |       |       |       |       |        |   |        |       |
|------------------------------------------------------------------------------------|------------------------------------------------------------------------------------------------------------------------------------------------------------------------------------------------------------------------------------------------|---------------------|-----|------|----------|-----|-------|-------|-------|-------|------|-------|-------|-------|-------|-------|-------|-------|-------|-------|-------|-------|--------|---|--------|-------|
| Serine/arginine-rich splicing factor 1<br>OS=Homo sapiens<br>GN=SRSF1 PE=1<br>SV=2 | 5 SRSF1_ HUMAN,s p Q0VCY 7 SRSF1_ BOVIN,sp  Q3YLA6  SRSF1_PI G,sp Q5R 7H2 SRSF 1_PONAB, sp Q6PD M2 SRSF 1_MOUSE ,tr D4A9L 2 D4A9L2 _RAT,tr E 2RIL3 E2 RIL3_CAN FA,tr F6R 520 F6R5 20_MAC MU,tr F6 YHN4 F6Y HN4_HOR SE,tr F7J0 L2 F7JOL2 _CRIGR | gPA<br>GnN<br>DcR   | 95% | 41.5 | 43.00422 | Ref | -0.24 | -0.11 | -0.14 | -0.24 | 0.29 | -0.69 | 0.091 | 43100 | 28800 | 34300 | 37600 | 38500 | 48700 | 25800 | 44000 | 627.8 | 1253.5 | 2 | 0.0108 | 8.643 |
|                                                                                    | 5 SRSF1_ HUMAN,s p Q0VCY 7 SRSF1_ BOVIN,sp  Q3YLA6  SRSF1_PI G,sp Q5R 7H2 SRSF 1_PONAB, sp Q6PD M2 SRSF 1_MOUSE ,tr D4A9L 2 D4A9L2 _RAT,tr E 2RIL3 E2 RIL3_CAN FA,tr F6R 520 F6R5 20_MAC MU,tr F6 YHN4 F6Y HN4_HOR SE,tr F7J0 L2 F7JOL2 _CRIGR | iYVG<br>NLPP<br>DIR | 87% | 40.5 | 52.09652 | Ref | -0.12 | -0.1  | -0.23 | -0.32 | 0.2  | -0.43 | 0.13  | 13200 | 10100 | 11000 | 11300 | 11800 | 14700 | 9950  | 14500 | 780.9 | 1559.9 | 2 | 0.0139 | 8.901 |

|                                                                                       |                                                                                                                                                                                                                                                                                                                        |                     |     |      |          |     |       |       |       |       |      |       |      |       |       |       |       |       |       |       |       |       |        |   |        |       |
|---------------------------------------------------------------------------------------|------------------------------------------------------------------------------------------------------------------------------------------------------------------------------------------------------------------------------------------------------------------------------------------------------------------------|---------------------|-----|------|----------|-----|-------|-------|-------|-------|------|-------|------|-------|-------|-------|-------|-------|-------|-------|-------|-------|--------|---|--------|-------|
| Serine/arginine-rich<br>splicing factor 1<br>OS=Homo sapiens<br>GN=SRSF1 PE=1<br>SV=2 | 5 SRSF1_ HUMAN,s<br>p Q0VCY<br>7 SRSF1_ BOVIN,sp<br> Q3YLA6 <br>SRSF1_PI<br>G,sp Q5R<br>7H2 SRSF<br>1_PONAB,<br>sp Q6PD<br>M2 SRSF<br>1_MOUSE<br>,tr D4A9L<br>2 D4A9L2<br>_RAT,tr E<br>2RIL3 E2<br>RIL3_CAN<br>FA,tr F6R<br>520 F6R5<br>20_MAC<br>MU,tr F6<br>YHN4 F6Y<br>HN4_HOR<br>SE,tr F7J0<br>L2 F7JOL2<br>_CRIGR | iYVG<br>NLPP<br>DIR | 85% | 40   | 52.65323 | Ref | -0.14 | -0.13 | -0.2  | -0.28 | 0.2  | -0.51 | 0.18 | 18900 | 14300 | 15700 | 16800 | 17400 | 21300 | 13600 | 21700 | 781   | 1559.9 | 2 | 0.0056 | 3.583 |
| Serine/arginine-rich<br>splicing factor 1<br>OS=Homo sapiens<br>GN=SRSF1 PE=1<br>SV=2 | 5 SRSF1_ HUMAN,s<br>p Q0VCY<br>7 SRSF1_ BOVIN,sp<br> Q3YLA6 <br>SRSF1_PI<br>G,sp Q5R<br>7H2 SRSF<br>1_PONAB,<br>sp Q6PD<br>M2 SRSF<br>1_MOUSE<br>,tr D4A9L<br>2 D4A9L2<br>_RAT,tr E<br>2RIL3 E2<br>RIL3_CAN<br>FA,tr F6R<br>520 F6R5<br>20_MAC<br>MU,tr F6<br>YHN4 F6Y<br>HN4_HOR<br>SE,tr F7J0<br>L2 F7JOL2<br>_CRIGR | sHEG<br>ETAY<br>IR  | 71% | 34.3 | 50.94338 | Ref | -0.11 | -0.03 | -0.17 | -0.25 | 0.13 | -0.36 | 0.11 | 18100 | 15200 | 17400 | 17700 | 18400 | 20900 | 15700 | 21400 | 489.6 | 1465.7 | 3 | 0.0141 | 9.602 |

|                                                                             |                       |                                      |     |      |          |     |      |       |       |        |       |       |       |      |      |      |       |       |      |      |      |       |        |   |        |       |
|-----------------------------------------------------------------------------|-----------------------|--------------------------------------|-----|------|----------|-----|------|-------|-------|--------|-------|-------|-------|------|------|------|-------|-------|------|------|------|-------|--------|---|--------|-------|
| Phosphatidylethanolamine-binding protein 1 OS=Bos taurus GN=PEBP1 PE=1 SV=2 | sp P13696 PEBP1_BOVIN | gNNI<br>SSGT<br>VLSD<br>YVGS<br>GPPk | 93% | 51.1 | 54.98214 | Ref | 0.47 | -0.45 | 0.31  | 0.13   | -0.22 | -0.21 | -0.53 | 7330 | 9610 | 5520 | 10500 | 10200 | 7030 | 7370 | 5870 | 853.1 | 2556.3 | 3 | 0.0187 | 7.321 |
| Phosphatidylethanolamine-binding protein 1 OS=Bos taurus GN=PEBP1 PE=1 SV=2 | sp P13696 PEBP1_BOVIN | gnNI<br>SSGT<br>VLSD<br>YVGS<br>GPPk | 95% | 69   | 55.04147 | Ref | 0.09 | -0.15 | 0.084 | -0.078 | -0.14 | 0.18  | -0.1  | 2530 | 2790 | 2560 | 3380  | 3330  | 2780 | 3630 | 2980 | 853.5 | 2557.3 | 3 | 0.0192 | 7.51  |
| Phosphatidylethanolamine-binding protein 1 OS=Bos taurus GN=PEBP1 PE=1 SV=2 | sp P13696 PEBP1_BOVIN | gnNI<br>SSGT<br>VLSD<br>YVGS<br>GPPk | 95% | 81.4 | 55.09567 | Ref | 0.3  | -0.27 | 0.024 | -0.072 | 0.053 | -0.55 | 0.011 | 4030 | 4210 | 3080 | 4230  | 4370  | 4160 | 2860 | 4180 | 853.5 | 2557.3 | 3 | 0.0165 | 6.443 |
| Phosphatidylethanolamine-binding protein 1 OS=Bos taurus GN=PEBP1 PE=1 SV=2 | sp P13696 PEBP1_BOVIN | gNNI<br>SSGT<br>VLSD<br>YVGS<br>GPPk | 88% | 43.3 | 54.63316 | Ref | 0.16 | -0.26 | 0.1   | -0.056 | -0.17 | -0.06 | -0.08 | 4400 | 4260 | 3450 | 4980  | 4920  | 3980 | 4480 | 4380 | 716.1 | 2860.6 | 4 | 0.0104 | 3.622 |
| Phosphatidylethanolamine-binding protein 1 OS=Bos taurus GN=PEBP1 PE=1 SV=2 | sp P13696 PEBP1_BOVIN | IYTL<br>VLTD<br>PDA<br>PSR           | 85% | 40.5 | 53.51168 | Ref | 0.17 | -0.12 | 0.1   | -0.22  | -0.05 | -0.3  | -0.07 | 4310 | 3920 | 3480 | 4570  | 4010  | 3950 | 3460 | 4040 | 933   | 1864   | 2 | 0.0146 | 7.844 |

|                                                                             |                       |                                               |     |      |          |     |       |       |      |        |       |       |       |       |       |       |       |       |       |       |       |       |        |   |        |       |
|-----------------------------------------------------------------------------|-----------------------|-----------------------------------------------|-----|------|----------|-----|-------|-------|------|--------|-------|-------|-------|-------|-------|-------|-------|-------|-------|-------|-------|-------|--------|---|--------|-------|
| Phosphatidylethanolamine-binding protein 1 OS=Bos taurus GN=PEBP1 PE=1 SV=2 | sp P13696 PEBP1_BOVIN | vLTP<br>TQV<br>k                              | 76% | 31.9 | 47.90194 | Ref | 0.16  | -0.4  | 0.23 | -0.16  | 0.16  | -0.56 | 0.009 | 30800 | 28700 | 21200 | 36700 | 30900 | 33700 | 21400 | 31500 | 747.5 | 1492.9 | 2 | 0.0071 | 4.72  |
| Phosphatidylethanolamine-binding protein 1 OS=Bos taurus GN=PEBP1 PE=1 SV=2 | sp P13696 PEBP1_BOVIN | vLTP<br>TQV<br>k                              | 79% | 33.4 | 47.41774 | Ref | 0.11  | -0.41 | 0.16 | -0.12  | 0.13  | -0.5  | 0.027 | 22500 | 19200 | 14600 | 24200 | 21900 | 22800 | 15400 | 22000 | 498.7 | 1492.9 | 3 | 0.0033 | 2.227 |
| Phosphatidylethanolamine-binding protein 1 OS=Bos taurus GN=PEBP1 PE=1 SV=2 | sp P13696 PEBP1_BOVIN | wSG<br>PLSL<br>QEV<br>DER<br>PQH<br>PLQ<br>Vk | 88% | 42.8 | 54.61261 | Ref | 0.018 | -0.25 | 0.27 | -0.13  | 0.26  | -0.61 | -0.01 | 5900  | 5380  | 4860  | 7780  | 6520  | 7440  | 4250  | 6400  | 763.7 | 3050.7 | 4 | 0.004  | 1.314 |
| Phosphatidylethanolamine-binding protein 1 OS=Bos taurus GN=PEBP1 PE=1 SV=2 | sp P13696 PEBP1_BOVIN | yGG<br>AEV<br>DELG<br>k                       | 68% | 35.9 | 53.15012 | Ref | 0.084 | -0.14 | 0.1  | -0.054 | 0.038 | -0.31 | -0.01 | 19500 | 18800 | 17500 | 23200 | 23000 | 21400 | 17600 | 21500 | 582.7 | 1744.9 | 3 | 0.0149 | 8.523 |
| Phosphatidylethanolamine-binding protein 1 OS=Bos taurus GN=PEBP1 PE=1 SV=2 | sp P13696 PEBP1_BOVIN | yVW<br>LVYE<br>QEG<br>PLk                     | 88% | 44.9 | 54.07692 | Ref | 0.3   | -0.34 | 0.23 | -0.1   | 0.17  | -0.59 | -0.2  | 3810  | 4080  | 2830  | 4750  | 4140  | 4380  | 2700  | 3510  | 744.7 | 2231.2 | 3 | 0.02   | 8.94  |

|                                                         |                                               |                             |     |      |          |     |      |       |      |      |       |      |       |       |       |       |       |       |       |       |       |       |        |   |        |       |
|---------------------------------------------------------|-----------------------------------------------|-----------------------------|-----|------|----------|-----|------|-------|------|------|-------|------|-------|-------|-------|-------|-------|-------|-------|-------|-------|-------|--------|---|--------|-------|
| Serpin A3-1 OS=Bos taurus<br>GN=SERPINA3-1<br>PE=1 SV=3 | sp Q9TTE1 SPA31_BOVIN, tr Q28921 Q28921_BOVIN | dTQSIIFLGK                  | 60% | 32.5 | 51.49558 | Ref | 0.73 | 0.43  | 0.19 | 0.14 | 0.51  | 0.49 | 0.2   | 4490  | 4510  | 3990  | 3790  | 4040  | 4550  | 4690  | 3810  | 577.3 | 1729   | 3 | 0.0067 | 3.845 |
| Serpin A3-1 OS=Bos taurus<br>GN=SERPINA3-1<br>PE=1 SV=3 | sp Q9TTE1 SPA31_BOVIN, tr Q28921 Q28921_BOVIN | iHEL<br>YLPK                | 77% | 35.2 | 49.95872 | Ref | 0.88 | 0.11  | 0.55 | 0.43 | -0.08 | 0.97 | 0.11  | 9440  | 16100 | 10200 | 15600 | 15800 | 9660  | 20900 | 11400 | 541   | 1620   | 3 | 0.0135 | 8.312 |
| Serpin A3-1 OS=Bos taurus<br>GN=SERPINA3-1<br>PE=1 SV=3 | sp Q9TTE1 SPA31_BOVIN, tr Q28921 Q28921_BOVIN | iHEL<br>YLPK                | 86% | 38.7 | 49.77531 | Ref | 0.96 | 0.1   | 0.44 | 0.33 | -0.02 | 0.97 | 0.2   | 10300 | 18500 | 11100 | 15800 | 16100 | 11100 | 22900 | 13300 | 541   | 1620   | 3 | 0.0082 | 5.036 |
| Serpin A3-1 OS=Bos taurus<br>GN=SERPINA3-1<br>PE=1 SV=3 | sp Q9TTE1 SPA31_BOVIN, tr Q28921 Q28921_BOVIN | sLIN<br>DYVvk               | 91% | 43.2 | 52.15624 | Ref | 1    | -0.07 | 0.69 | 0.43 | 0.012 | 0.79 | 0.035 | 14600 | 26300 | 13600 | 25800 | 23800 | 15500 | 27700 | 16300 | 780.5 | 1558.9 | 2 | 0.0085 | 5.457 |
| Serpin A3-1 OS=Bos taurus<br>GN=SERPINA3-1<br>PE=1 SV=3 | sp Q9TTE1 SPA31_BOVIN, tr Q28921 Q28921_BOVIN | sNYE<br>LNDI<br>LSQL<br>GIR | 95% | 58.1 | 53.93882 | Ref | 0.63 | 0.15  | 0.42 | 0.46 | 0.097 | 0.81 | -0.01 | 354   | 325   | 253   | 342   | 388   | 263   | 449   | 253   | 680.4 | 2038.1 | 3 | 0.0043 | 2.089 |
| Serpin A3-1 OS=Bos taurus<br>GN=SERPINA3-1<br>PE=1 SV=3 | sp Q9TTE1 SPA31_BOVIN, tr Q28921 Q28921_BOVIN | sNYE<br>LNDI<br>LSQL<br>GIR | 95% | 69.2 | 54.00881 | Ref | 0.51 | 0.27  | 0.39 | 0.29 | 0.25  | 0.95 | 0.51  | 253   | 331   | 304   | 369   | 379   | 323   | 548   | 401   | 680.4 | 2038.1 | 3 | 0.009  | 4.428 |

|                                                         |                                               |                             |     |      |          |     |      |       |       |        |       |       |       |      |      |      |      |      |      |      |      |       |        |   |        |       |
|---------------------------------------------------------|-----------------------------------------------|-----------------------------|-----|------|----------|-----|------|-------|-------|--------|-------|-------|-------|------|------|------|------|------|------|------|------|-------|--------|---|--------|-------|
| Serpin A3-1 OS=Bos taurus<br>GN=SERPINA3-1<br>PE=1 SV=3 | sp Q9TTE1 SPA31_BOVIN, tr Q28921 Q28921_BOVIN | sNYE<br>LNDI<br>LSQL<br>GIR | 84% | 42.2 | 53.93264 | Ref | 0.95 | -0.11 | 0.57  | 0.48   | 0.24  | 0.17  | 0.21  | 210  | 242  | 125  | 225  | 234  | 173  | 172  | 176  | 680.4 | 2038.1 | 3 | 0.0026 | 1.28  |
| Serpin A3-1 OS=Bos taurus<br>GN=SERPINA3-1<br>PE=1 SV=3 | sp Q9TTE1 SPA31_BOVIN, tr Q28921 Q28921_BOVIN | tELV<br>LVNY<br>IYFK        | 88% | 42.7 | 52.26182 | Ref | 0.73 | 0.015 | 0.6   | 0.32   | -0.4  | 1.1   | 0.38  | 993  | 1390 | 918  | 1550 | 1400 | 745  | 2190 | 1320 | 704.1 | 2109.2 | 3 | 0.0123 | 5.842 |
| Serpin A3-1 OS=Bos taurus<br>GN=SERPINA3-1<br>PE=1 SV=3 | sp Q9TTE1 SPA31_BOVIN, tr Q28921 Q28921_BOVIN | tELV<br>LVNY<br>IYFK        | 88% | 43.3 | 52.45969 | Ref | 1    | 0.07  | 0.83  | 0.37   | -0.23 | 0.88  | 0.021 | 272  | 602  | 337  | 643  | 512  | 295  | 665  | 365  | 704.1 | 2109.2 | 3 | 0.0172 | 8.174 |
| Serpin A3-1 OS=Bos taurus<br>GN=SERPINA3-1<br>PE=1 SV=3 | sp Q9TTE1 SPA31_BOVIN, tr Q28921 Q28921_BOVIN | vNRP<br>FLIAI<br>VLk        | 70% | 23.5 | 42.28913 | Ref | 1    | 0.45  | 0.58  | 0.21   | -0.13 | 0.45  | -0.13 | 1310 | 1640 | 1190 | 1460 | 1250 | 862  | 1340 | 893  | 498.6 | 1990.3 | 4 | 0.0012 | 0.605 |
| Thioltransferase<br>OS=Ovis aries PE=4<br>SV=1          | tr B2ZA84 B2ZA84_SHEEP                        | aQA<br>FVNS<br>k            | 95% | 55.1 | 51.18255 | Ref | 1.7  | 0.027 | -0.31 | -0.86  | -0.16 | -0.71 | 0.53  | 1190 | 4150 | 1400 | 1250 | 937  | 1330 | 950  | 2230 | 605.8 | 1209.7 | 2 | 0.0104 | 8.555 |
| Thioltransferase<br>OS=Ovis aries PE=4<br>SV=1          | tr B2ZA84 B2ZA84_SHEEP                        | kTQE<br>LLSQ<br>LPFk        | 54% | 28.4 | 48.4005  | Ref | 0.2  | -0.3  | 0.68  | 0.095  | 0.73  | -0.52 | 0.52  | 1020 | 1010 | 780  | 1720 | 1260 | 1710 | 752  | 1540 | 782.1 | 2343.4 | 3 | 0.0108 | 4.604 |
| Thioltransferase<br>OS=Ovis aries PE=4<br>SV=1          | tr B2ZA84 B2ZA84_SHEEP                        | kTQE<br>LLSQ<br>LPFk        | 92% | 40   | 48.09654 | Ref | 0.24 | -0.18 | 0.57  | -0.024 | 0.79  | -0.4  | 0.48  | 3190 | 3280 | 2660 | 5040 | 3670 | 5640 | 2580 | 4700 | 586.9 | 2343.4 | 4 | 0.0055 | 2.346 |



|                                                                                    |                                |                      |     |      |          |     |       |       |       |       |       |       |       |      |      |      |      |      |      |      |      |       |        |   |        |       |
|------------------------------------------------------------------------------------|--------------------------------|----------------------|-----|------|----------|-----|-------|-------|-------|-------|-------|-------|-------|------|------|------|------|------|------|------|------|-------|--------|---|--------|-------|
| Thioltransferase<br>OS=Ovis aries PE=4<br>SV=1                                     | tr B2ZA8<br>4 B2ZA84<br>_SHEEP | kTQE<br>LLSQ<br>LPFK | 94% | 45.5 | 48.45284 | Ref | 0.31  | -0.24 | 0.56  | 0.043 | 0.78  | -0.41 | 0.54  | 816  | 976  | 722  | 1410 | 1090 | 1580 | 725  | 1390 | 782.1 | 2343.4 | 3 | 0.0128 | 5.461 |
| Thioltransferase<br>OS=Ovis aries PE=4<br>SV=1                                     | tr B2ZA8<br>4 B2ZA84<br>_SHEEP | qIGA<br>LQ           | 91% | 37.9 | 46.86886 | Ref | 1.2   | 0.96  | -0.15 | -0.63 | 0.23  | -0.62 | 0.074 | 433  | 1220 | 1100 | 572  | 453  | 715  | 417  | 667  | 467.3 | 932.56 | 2 | 0.0034 | 3.641 |
| Thioltransferase<br>OS=Ovis aries PE=4<br>SV=1                                     | tr B2ZA8<br>4 B2ZA84<br>_SHEEP | qIGA<br>LQ           | 55% | 26.8 | 46.86368 | Ref | 1.2   | 1.1   | -0.18 | -0.41 | 0.12  | -0.86 | 0.2   | 368  | 1170 | 1140 | 544  | 512  | 645  | 342  | 706  | 467.3 | 932.56 | 2 | 0.0028 | 3.041 |
| Thioltransferase<br>OS=Ovis aries PE=4<br>SV=1                                     | tr B2ZA8<br>4 B2ZA84<br>_SHEEP | qIGA<br>LQ           | 86% | 34.7 | 46.96156 | Ref | 0.88  | 0.46  | -0.06 | -0.11 | 0.14  | -0.07 | 0.34  | 2090 | 3310 | 2680 | 2100 | 2230 | 2320 | 2100 | 2770 | 467.3 | 932.55 | 2 | 0.0055 | 5.934 |
| Thioltransferase<br>OS=Ovis aries PE=4<br>SV=1                                     | tr B2ZA8<br>4 B2ZA84<br>_SHEEP | qIGA<br>LQ           | 82% | 32.9 | 46.96496 | Ref | 1     | 0.69  | -0.22 | -0.19 | 0.055 | -0.02 | -0.02 | 1520 | 2580 | 2240 | 1330 | 1500 | 1550 | 1540 | 1520 | 467.3 | 932.55 | 2 | 0.0052 | 5.527 |
| Thioltransferase<br>OS=Ovis aries PE=4<br>SV=1                                     | tr B2ZA8<br>4 B2ZA84<br>_SHEEP | vVVF<br>Ik           | 84% | 25.4 | 37.478   | Ref | -0.03 | -0.04 | 0.25  | 0.27  | 0.5   | -0.2  | 0.75  | 2100 | 1620 | 1750 | 2400 | 2690 | 2750 | 1770 | 3390 | 438.3 | 1311.9 | 3 | 0.0038 | 2.901 |
| Thioltransferase<br>OS=Ovis aries PE=4<br>SV=1                                     | tr B2ZA8<br>4 B2ZA84<br>_SHEEP | vVVF<br>Ik           | 56% | 19.7 | 39.27576 | Ref | -0.17 | 0.032 | 0.47  | 0.082 | 0.39  | -0.13 | 0.87  | 2960 | 2260 | 2810 | 4280 | 3600 | 3890 | 2840 | 5620 | 438.3 | 1311.9 | 3 | 0.0028 | 2.126 |
| Endothelin<br>converting enzyme<br>(Fragment) OS=Ovis<br>aries GN=ECE PE=2<br>SV=1 | tr Q9GM<br>C4 Q9GM<br>C4_SHEEP | fME<br>VMY<br>GTK    | 77% | 37.2 | 52.83102 | Ref | 0.13  | -0.43 | 0.058 | 0.018 | 0.21  | -0.5  | 0.004 | 3400 | 2970 | 2190 | 3440 | 3690 | 3680 | 2340 | 3300 | 857.5 | 1712.9 | 2 | 0.0195 | 11.38 |

|                                                                                    |                                |                     |     |      |          |     |      |       |       |        |      |       |       |       |       |       |       |       |       |       |       |       |        |   |        |       |
|------------------------------------------------------------------------------------|--------------------------------|---------------------|-----|------|----------|-----|------|-------|-------|--------|------|-------|-------|-------|-------|-------|-------|-------|-------|-------|-------|-------|--------|---|--------|-------|
| Endothelin<br>converting enzyme<br>(Fragment) OS=Ovis<br>aries GN=ECE PE=2<br>SV=1 | tr Q9GM<br>C4 Q9GM<br>C4_SHEEP | fQD<br>Adek         | 82% | 37.8 | 51.63656 | Ref | 0.29 | -0.63 | 0.14  | -0.076 | 0.4  | -0.94 | 0.1   | 47100 | 49200 | 28200 | 54000 | 51300 | 62300 | 25600 | 52500 | 730.9 | 1459.8 | 2 | 0.006  | 4.08  |
| Endothelin<br>converting enzyme<br>(Fragment) OS=Ovis<br>aries GN=ECE PE=2<br>SV=1 | tr Q9GM<br>C4 Q9GM<br>C4_SHEEP | niAG<br>EIIIEI<br>k | 95% | 49.4 | 49.50063 | Ref | 0.26 | -0.46 | -0.01 | -0.19  | 0.32 | -0.57 | 0.12  | 3700  | 3670  | 2420  | 3720  | 3600  | 4490  | 2540  | 4060  | 607.7 | 1820.1 | 3 | 0.0123 | 6.761 |
| Endothelin<br>converting enzyme<br>(Fragment) OS=Ovis<br>aries GN=ECE PE=2<br>SV=1 | tr Q9GM<br>C4 Q9GM<br>C4_SHEEP | niAG<br>EIIIEI<br>k | 88% | 39.7 | 49.16286 | Ref | 0.24 | -0.79 | 0.22  | -0.083 | 0.38 | -0.9  | 0.22  | 1330  | 1380  | 736   | 1670  | 1480  | 1780  | 766   | 1650  | 607.7 | 1820.1 | 3 | 0.0083 | 4.554 |
| Endothelin<br>converting enzyme<br>(Fragment) OS=Ovis<br>aries GN=ECE PE=2<br>SV=1 | tr Q9GM<br>C4 Q9GM<br>C4_SHEEP | niAG<br>EIIIEI<br>k | 95% | 49   | 48.80693 | Ref | 0.25 | -0.72 | 0.09  | -0.096 | 0.39 | -0.64 | 0.047 | 3180  | 3090  | 1710  | 3360  | 3250  | 3980  | 2030  | 3250  | 607.7 | 1820.1 | 3 | 0.0045 | 2.445 |

|                                                                                    |                                |                      |     |      |          |     |        |       |      |        |      |       |       |      |      |      |      |      |      |      |      |       |        |   |        |       |
|------------------------------------------------------------------------------------|--------------------------------|----------------------|-----|------|----------|-----|--------|-------|------|--------|------|-------|-------|------|------|------|------|------|------|------|------|-------|--------|---|--------|-------|
| Endothelin<br>converting enzyme<br>(Fragment) OS=Ovis<br>aries GN=ECE PE=2<br>SV=1 | tr Q9GM<br>C4 Q9GM<br>C4_SHEEP | niAG<br>EIIIEI<br>k  | 95% | 51.9 | 48.8015  | Ref | 0.33   | -0.74 | 0.23 | -0.043 | 0.21 | -0.64 | 0.097 | 2450 | 2760 | 1420 | 3130 | 2850 | 2970 | 1720 | 2840 | 607.7 | 1820.1 | 3 | 0.0041 | 2.231 |
| Endothelin<br>converting enzyme<br>(Fragment) OS=Ovis<br>aries GN=ECE PE=2<br>SV=1 | tr Q9GM<br>C4 Q9GM<br>C4_SHEEP | niAG<br>EIIIEI<br>k  | 86% | 38.6 | 49.16864 | Ref | 0.093  | -0.43 | 0.27 | -0.038 | 0.12 | -0.24 | 0.079 | 1840 | 1970 | 1490 | 2710 | 2410 | 2360 | 1920 | 2370 | 607.7 | 1820.1 | 3 | 0.0079 | 4.356 |
| Endothelin<br>converting enzyme<br>(Fragment) OS=Ovis<br>aries GN=ECE PE=2<br>SV=1 | tr Q9GM<br>C4 Q9GM<br>C4_SHEEP | niAG<br>EIIIEI<br>k  | 90% | 41.1 | 48.6318  | Ref | -0.007 | -0.26 | 0.19 | 0.079  | 0.06 | -0.08 | -0.11 | 695  | 663  | 605  | 925  | 945  | 814  | 770  | 750  | 607.7 | 1820.1 | 3 | 0.0025 | 1.377 |
| Endothelin<br>converting enzyme<br>(Fragment) OS=Ovis<br>aries GN=ECE PE=2<br>SV=1 | tr Q9GM<br>C4 Q9GM<br>C4_SHEEP | niAG<br>EIIIEI<br>kk | 76% | 26.5 | 43.54607 | Ref | -0.13  | -0.56 | 0.15 | 0.12   | 0.31 | -0.62 | 0.33  | 2590 | 2250 | 1810 | 3320 | 3600 | 3570 | 1950 | 3770 | 564.1 | 2252.4 | 4 | 0.0021 | 0.921 |

|                                                                                            |                                                                                                                                                                                                                                                                                                                      |                           |     |      |          |     |        |       |       |       |      |       |       |       |       |       |       |       |       |       |       |       |        |   |        |       |
|--------------------------------------------------------------------------------------------|----------------------------------------------------------------------------------------------------------------------------------------------------------------------------------------------------------------------------------------------------------------------------------------------------------------------|---------------------------|-----|------|----------|-----|--------|-------|-------|-------|------|-------|-------|-------|-------|-------|-------|-------|-------|-------|-------|-------|--------|---|--------|-------|
| Endothelin<br>converting enzyme<br>(Fragment) OS=Ovis<br>aries GN=ECE PE=2<br>SV=1         | tr Q9GM<br>C4 Q9GM<br>C4_SHEEP                                                                                                                                                                                                                                                                                       | wM<br>DED<br>TR           | 87% | 33.9 | 45.83912 | Ref | 0.24   | -0.37 | -0    | 0.075 | 0.29 | -1.1  | 0.03  | 18400 | 16900 | 12000 | 17400 | 20200 | 20400 | 8420  | 17700 | 628.8 | 1255.6 | 2 | 0.0096 | 7.655 |
| Eukaryotic<br>translation initiation<br>factor 4H OS=Homo<br>sapiens GN=EIF4H<br>PE=1 SV=5 | 6 IF4H_H<br>UMAN,sp<br> Q5RBR8<br> IF4H_PO<br>NAB,sp Q<br>5X172 IF4<br>H_RAT,sp<br> Q9WUK2<br> IF4H_M<br>OUSE,tr E<br>2RQG8 E<br>2RQG8_C<br>ANFA,tr F<br>7HNN0 F<br>7HNN0_<br>MACMU,t<br>r F7HNN2<br> F7HNN2<br>_MACMU,<br>tr F8WG1<br>4 F8WG1<br>4_RAT,tr <br>Q3TG58 <br>Q3TG58_<br>MOUSE,tr<br> Q3V244 <br>Q3V244_ | eALT<br>YDG<br>ALLG<br>DR | 95% | 57.3 | 52.69527 | Ref | -0.084 | -0.27 | -0.09 | -0.26 | 0.1  | -0.44 | -0.12 | 17700 | 12600 | 12000 | 15300 | 15000 | 16800 | 12100 | 14900 | 849.4 | 1696.9 | 2 | 0.0141 | 8.32  |

|                                                                                |                                                                                                                                                                                                                |             |     |      |          |     |        |       |       |        |      |       |       |      |      |      |      |       |       |      |      |       |        |   |        |       |
|--------------------------------------------------------------------------------|----------------------------------------------------------------------------------------------------------------------------------------------------------------------------------------------------------------|-------------|-----|------|----------|-----|--------|-------|-------|--------|------|-------|-------|------|------|------|------|-------|-------|------|------|-------|--------|---|--------|-------|
| Eukaryotic translation initiation factor 4H OS=Homo sapiens GN=EIF4H PE=1 SV=5 | 6 IF4H_HUMAN,sp Q5RBR8 IF4H_PONAB,sp Q5XI72 IF4H_RAT,sp Q9WUK2 IF4H_MOUSE,tr E2RQG8 E2RQG8_CANFA,tr F7HNN0 F7HNN0_MACMU,tr F7HNN2 F7HNN2_MACMU,tr F8WG14 F8WG14_RAT,tr Q3TG58 Q3TG58_MOUSE,tr Q3V244 Q3V244_DR | eALTYDGLLGD | 95% | 49.4 | 52.71158 | Ref | -0.022 | -0.26 | -0.03 | -0.074 | 0.24 | -0.86 | -0.19 | 9940 | 7940 | 7320 | 9630 | 10300 | 11200 | 5420 | 8590 | 849.4 | 1696.9 | 2 | 0.0116 | 6.812 |
| Eukaryotic translation initiation factor 4H OS=Homo sapiens GN=EIF4H PE=1 SV=5 | 6 IF4H_HUMAN,sp Q5RBR8 IF4H_PONAB,sp Q5XI72 IF4H_RAT,sp Q9WUK2 IF4H_MOUSE,tr E2RQG8 E2RQG8_CANFA,tr F7HNN0 F7HNN0_MACMU,tr F7HNN2 F7HNN2_MACMU,tr F8WG14 F8WG14_RAT,tr Q3TG58 Q3TG58_MOUSE,tr Q3V244 Q3V244_DR | eALTYDGLLGD | 94% | 46.8 | 52.71082 | Ref | 0.011  | -0.26 | -0.09 | -0.27  | 0.2  | -0.59 | -0.22 | 6080 | 4610 | 4140 | 5230 | 5080  | 6180  | 3720 | 4770 | 849.4 | 1696.9 | 2 | 0.0113 | 6.671 |

|                                                                                |                                                                                                                                                                                                                                                                                                                              |                            |     |      |          |     |       |       |       |        |       |       |       |       |       |       |       |       |       |       |       |       |        |   |        |       |
|--------------------------------------------------------------------------------|------------------------------------------------------------------------------------------------------------------------------------------------------------------------------------------------------------------------------------------------------------------------------------------------------------------------------|----------------------------|-----|------|----------|-----|-------|-------|-------|--------|-------|-------|-------|-------|-------|-------|-------|-------|-------|-------|-------|-------|--------|---|--------|-------|
| Eukaryotic translation initiation factor 4H OS=Homo sapiens GN=EIF4H PE=1 SV=5 | 6 IF4H_H<br>UMAN,sp<br> Q5RBR8<br> IF4H_PO<br>NAB,sp Q<br>5XI72 IF4<br>H_RAT,sp<br> Q9WUK2<br> IF4H_M<br>OUSE,tr E<br>2RQG8 E<br>2RQG8_C<br>ANFA,tr F<br>7HNN0 F<br>7HNN0_<br>MACMU,t<br>r F7HNN2<br> F7HNN2<br>_MACMU,<br>tr F8WG1<br>4 F8WG1<br>4_RAT,tr <br>Q3TG58 <br>Q3TG58_<br>MOUSE,tr<br> Q3V244 <br>Q3V244_<br>EEER | gSN<br>MDF<br>REPT<br>EEER | 83% | 36.7 | 48.9679  | Ref | -0.16 | -0.38 | 0.046 | -0.24  | 0.27  | -0.57 | 0.071 | 67500 | 54400 | 50600 | 76600 | 69300 | 86200 | 50100 | 77700 | 667.6 | 1999.9 | 3 | 0.0145 | 7.259 |
| Eukaryotic translation initiation factor 4H OS=Homo sapiens GN=EIF4H PE=1 SV=5 | 6 IF4H_H<br>UMAN,sp<br> Q5RBR8<br> IF4H_PO<br>NAB,sp Q<br>5XI72 IF4<br>H_RAT,sp<br> Q9WUK2<br> IF4H_M<br>OUSE,tr E<br>2RQG8 E<br>2RQG8_C<br>ANFA,tr F<br>7HNN0 F<br>7HNN0_<br>MACMU,t<br>r F7HNN2<br> F7HNN2<br>_MACMU,<br>tr F8WG1<br>4 F8WG1<br>4_RAT,tr <br>Q3TG58 <br>Q3TG58_<br>MOUSE,tr<br> Q3V244 <br>Q3V244_<br>EEER | gSN<br>MDF<br>REPT<br>EEER | 83% | 35.3 | 48.90924 | Ref | -0.38 | -0.53 | 0.052 | -0.008 | 0.071 | -0.38 | 0.2   | 1250  | 850   | 831   | 1400  | 1480  | 1360  | 1040  | 1540  | 1001  | 1999.9 | 2 | 0.0161 | 8.041 |

|                                                                                |                                                                                                                                                                                                                                                                                                                              |                                          |     |      |          |     |        |       |       |        |       |       |       |       |       |       |       |       |       |       |       |       |        |   |        |       |
|--------------------------------------------------------------------------------|------------------------------------------------------------------------------------------------------------------------------------------------------------------------------------------------------------------------------------------------------------------------------------------------------------------------------|------------------------------------------|-----|------|----------|-----|--------|-------|-------|--------|-------|-------|-------|-------|-------|-------|-------|-------|-------|-------|-------|-------|--------|---|--------|-------|
| Eukaryotic translation initiation factor 4H OS=Homo sapiens GN=EIF4H PE=1 SV=5 | 6 IF4H_H<br>UMAN,sp<br> Q5RBR8<br> IF4H_PO<br>NAB,sp Q<br>5XI72 IF4<br>H_RAT,sp<br> Q9WUK2<br> IF4H_M<br>OUSE,tr E<br>2RQG8 E<br>2RQG8_C<br>ANFA,tr F<br>7HNN0 F<br>7HNN0_<br>MACMU,t<br>r F7HNN2<br> F7HNN2<br>_MACMU,<br>tr F8WG1<br>4 F8WG1<br>4_RAT,tr <br>Q3TG58 <br>Q3TG58_<br>MOUSE,tr<br> Q3V244 <br>Q3V244_<br>EEER | gSN<br>MDF<br>REPT                       | 68% | 31.7 | 48.91231 | Ref | -0.22  | -0.34 | 0.058 | -0.13  | 0.3   | -0.67 | -0.12 | 28300 | 20100 | 20100 | 29700 | 28800 | 33800 | 18100 | 26200 | 667.6 | 1999.9 | 3 | 0.016  | 7.979 |
| Eukaryotic translation initiation factor 4H OS=Homo sapiens GN=EIF4H PE=1 SV=5 | 6 IF4H_H<br>UMAN,sp<br> Q5RBR8<br> IF4H_PO<br>NAB,sp Q<br>5XI72 IF4<br>H_RAT,sp<br> Q9WUK2<br> IF4H_M<br>OUSE,tr E<br>2RQG8 E<br>2RQG8_C<br>ANFA,tr F<br>7HNN0 F<br>7HNN0_<br>MACMU,t<br>r F7HNN2<br> F7HNN2<br>_MACMU,<br>tr F8WG1<br>4 F8WG1<br>4_RAT,tr <br>Q3TG58 <br>Q3TG58_<br>MOUSE,tr<br> Q3V244 <br>Q3V244_<br>RPR  | tVAT<br>PLN<br>QVA<br>NPN<br>SAIF<br>GGA | 82% | 42.2 | 54.91729 | Ref | -0.033 | -0.57 | 0.008 | -0.087 | 0.044 | -0.39 | 0.029 | 2700  | 2240  | 1680  | 2810  | 2900  | 2770  | 2150  | 2850  | 885.8 | 2654.4 | 3 | 0.0212 | 7.993 |

|                                                                                |                                                                                                                                                                                                                                                                                                                             |                                           |     |      |          |     |       |       |       |        |      |       |       |      |      |      |      |      |      |      |      |       |        |   |        |       |
|--------------------------------------------------------------------------------|-----------------------------------------------------------------------------------------------------------------------------------------------------------------------------------------------------------------------------------------------------------------------------------------------------------------------------|-------------------------------------------|-----|------|----------|-----|-------|-------|-------|--------|------|-------|-------|------|------|------|------|------|------|------|------|-------|--------|---|--------|-------|
| Eukaryotic translation initiation factor 4H OS=Homo sapiens GN=EIF4H PE=1 SV=5 | 6 IF4H_H<br>UMAN,sp<br> Q5RBR8<br> IF4H_PO<br>NAB,sp Q<br>5XI72 IF4<br>H_RAT,sp<br> Q9WUK2<br> IF4H_M<br>OUSE,tr E<br>2RQG8 E<br>2RQG8_C<br>ANFA,tr F<br>7HNN0 F<br>7HNN0_<br>MACMU,t<br>r F7HNN2<br> F7HNN2<br>_MACMU,<br>tr F8WG1<br>4 F8WG1<br>4_RAT,tr <br>Q3TG58 <br>Q3TG58_<br>MOUSE,tr<br> Q3V244 <br>Q3V244_<br>RPR | tVAT<br>PLN<br>QVA<br>NPN<br>SAIF<br>GGA  | 77% | 40.2 | 54.92755 | Ref | -0.56 | -0.6  | 0.017 | -0.1   | 0.22 | -0.23 | 0.23  | 2200 | 1360 | 1440 | 2470 | 2510 | 2750 | 2100 | 2860 | 885.8 | 2654.4 | 3 | 0.0223 | 8.411 |
| Eukaryotic translation initiation factor 4H OS=Homo sapiens GN=EIF4H PE=1 SV=5 | 6 IF4H_H<br>UMAN,sp<br> Q5RBR8<br> IF4H_PO<br>NAB,sp Q<br>5XI72 IF4<br>H_RAT,sp<br> Q9WUK2<br> IF4H_M<br>OUSE,tr E<br>2RQG8 E<br>2RQG8_C<br>ANFA,tr F<br>7HNN0 F<br>7HNN0_<br>MACMU,t<br>r F7HNN2<br> F7HNN2<br>_MACMU,<br>tr F8WG1<br>4 F8WG1<br>4_RAT,tr <br>Q3TG58 <br>Q3TG58_<br>MOUSE,tr<br> Q3V244 <br>Q3V244_<br>PR  | tVAT<br>PLN<br>QVA<br>NPnS<br>AIFG<br>GAR | 84% | 43.2 | 55.05125 | Ref | -0.55 | -0.19 | -0.09 | -0.012 | 0.3  | -0.43 | 0.085 | 3200 | 2090 | 2920 | 3490 | 4070 | 4400 | 2770 | 3940 | 886.1 | 2655.4 | 3 | 0.0195 | 7.326 |



|                                                                                       |                                                                                                                                                                                                                                      |                                                       |            |             |                 |            |              |              |              |               |             |              |              |              |              |              |              |              |              |              |              |              |               |          |               |              |
|---------------------------------------------------------------------------------------|--------------------------------------------------------------------------------------------------------------------------------------------------------------------------------------------------------------------------------------|-------------------------------------------------------|------------|-------------|-----------------|------------|--------------|--------------|--------------|---------------|-------------|--------------|--------------|--------------|--------------|--------------|--------------|--------------|--------------|--------------|--------------|--------------|---------------|----------|---------------|--------------|
| <p>Eukaryotic translation initiation factor 4H OS=Homo sapiens GN=EIF4H PE=1 SV=5</p> | <p>6 IF4H_HUMAN,sp Q5RBR8 IF4H_PONAB,sp Q5XI72 IF4H_RAT,sp Q9WUK2 IF4H_MOUSE,tr E2RQG8 E2RQG8_CANFA,tr F7HNN0 F7HNN0_MACMU,tr F8WG14 F8WG14_RAT,tr Q3TG58 Q3TG58_MOUSE,tr Q3V244 Q3V244_PR</p>                                       | <p>tVAT<br/>PLN<br/>QVA<br/>NPnS<br/>AIFG<br/>GAR</p> | <p>89%</p> | <p>46.5</p> | <p>54.95908</p> | <p>Ref</p> | <p>-0.33</p> | <p>-0.41</p> | <p>0.039</p> | <p>-0.11</p>  | <p>0.22</p> | <p>-0.16</p> | <p>0.094</p> | <p>352</p>   | <p>302</p>   | <p>309</p>   | <p>474</p>   | <p>472</p>   | <p>516</p>   | <p>414</p>   | <p>491</p>   | <p>886.2</p> | <p>2655.4</p> | <p>3</p> | <p>0.0103</p> | <p>3.882</p> |
| <p>60S ribosomal protein L31 OS=Homo sapiens GN=RPL31 PE=1 SV=1</p>                   | <p>9 RL31_HUMAN,sp P62900 RL31_MOUSE,sp P62901 RL31_PIG,sp P62902 RL31_RAT,sp Q1KSC7 RL31_ARMOS,sp Q56JX3 RL31_BOVIN,tr B2R4C1 B2R4C1_HUMAN,tr D3ZU04 D3ZU04_RAT,tr D3ZX87 D3ZX87_RAT,tr D4ABZ9 D4ABZ9_RAT,tr E2R8G3 E2R8G3_NIHK</p> | <p>eYTI<br/>NIHK</p>                                  | <p>58%</p> | <p>33</p>   | <p>52.2253</p>  | <p>Ref</p> | <p>0.29</p>  | <p>-0.05</p> | <p>0.42</p>  | <p>-0.018</p> | <p>0.31</p> | <p>0.004</p> | <p>0.23</p>  | <p>33700</p> | <p>40100</p> | <p>34500</p> | <p>53300</p> | <p>43500</p> | <p>47800</p> | <p>40300</p> | <p>46900</p> | <p>542.7</p> | <p>1624.9</p> | <p>3</p> | <p>0.0109</p> | <p>6.71</p>  |

|                                                                       |                                                                                                                                                                                                                                                                                                                                  |             |     |      |          |     |      |       |      |       |      |       |      |       |       |       |       |       |       |       |       |       |        |   |        |       |
|-----------------------------------------------------------------------|----------------------------------------------------------------------------------------------------------------------------------------------------------------------------------------------------------------------------------------------------------------------------------------------------------------------------------|-------------|-----|------|----------|-----|------|-------|------|-------|------|-------|------|-------|-------|-------|-------|-------|-------|-------|-------|-------|--------|---|--------|-------|
| 60S ribosomal protein L31<br>OS=Homo sapiens<br>GN=RPL31 PE=1<br>SV=1 | 9 RL31_H<br>UMAN,sp<br> P62900 <br>RL31_MO<br>USE,sp P6<br>2901 RL3<br>1_PIG,sp <br>P62902 R<br>L31_RAT,s<br>p Q1KSC7<br> RL31_M<br>ARMO,sp<br> Q56JX3 <br>RL31_BO<br>VIN,tr B2<br>R4C1 B2R<br>4C1_HUM<br>AN,tr D3Z<br>U04 D3Z<br>U04_RAT,<br>tr D3ZX8<br>7 D3ZX87<br>_RAT,tr D<br>4ABZ9 D4<br>ABZ9_RAT<br>,tr E2R8G<br>3 E2R8G3 | iHGV<br>GfK | 63% | 28.9 | 49.01845 | Ref | 0.26 | -0.16 | 0.53 | -0.26 | 0.72 | -0.28 | 0.37 | 12000 | 18100 | 14800 | 26600 | 17000 | 29400 | 15300 | 23800 | 342.2 | 1364.8 | 4 | 0.0176 | 12.86 |
| 60S ribosomal protein L31<br>OS=Homo sapiens<br>GN=RPL31 PE=1<br>SV=1 | 9 RL31_H<br>UMAN,sp<br> P62900 <br>RL31_MO<br>USE,sp P6<br>2901 RL3<br>1_PIG,sp <br>P62902 R<br>L31_RAT,s<br>p Q1KSC7<br> RL31_M<br>ARMO,sp<br> Q56JX3 <br>RL31_BO<br>VIN,tr B2<br>R4C1 B2R<br>4C1_HUM<br>AN,tr D3Z<br>U04 D3Z<br>U04_RAT,<br>tr D3ZX8<br>7 D3ZX87<br>_RAT,tr D<br>4ABZ9 D4<br>ABZ9_RAT<br>,tr E2R8G<br>3 E2R8G3 | iHGV<br>GfK | 53% | 27.8 | 47.92665 | Ref | 0.25 | 0.068 | 0.55 | -0.05 | 0.29 | -0.16 | 0.21 | 36900 | 43400 | 41400 | 64800 | 47200 | 52100 | 40000 | 51200 | 456   | 1364.8 | 3 | 0.0023 | 1.713 |

|                                                                       |                                                                                                                                                                                                                                                                                                                                  |                            |     |      |          |     |       |       |      |       |       |       |      |      |      |      |       |      |       |      |      |       |        |   |        |       |
|-----------------------------------------------------------------------|----------------------------------------------------------------------------------------------------------------------------------------------------------------------------------------------------------------------------------------------------------------------------------------------------------------------------------|----------------------------|-----|------|----------|-----|-------|-------|------|-------|-------|-------|------|------|------|------|-------|------|-------|------|------|-------|--------|---|--------|-------|
| 60S ribosomal protein L31<br>OS=Homo sapiens<br>GN=RPL31 PE=1<br>SV=1 | 9 RL31_H<br>UMAN,sp<br> P62900 <br>RL31_MO<br>USE,sp P6<br>2901 RL3<br>1_PIG,sp <br>P62902 R<br>L31_RAT,s<br>p Q1KSC7<br> RL31_M<br>ARMO,sp<br> Q56JX3 <br>RL31_BO<br>VIN,tr B2<br>R4C1 B2R<br>4C1_HUM<br>AN,tr D3Z<br>U04 D3Z<br>U04_RAT,<br>tr D3ZX8<br>7 D3ZX87<br>_RAT,tr D<br>4ABZ9 D4<br>ABZ9_RAT<br>,tr E2R8G<br>3 E2R8G3 | iHGV<br>GfK                | 62% | 27.5 | 47.87347 | Ref | 0.068 | -0.23 | 0.59 | -0.23 | 0.8   | -0.34 | 0.34 | 5040 | 6020 | 5310 | 10500 | 6580 | 11700 | 5560 | 8830 | 342.2 | 1364.8 | 4 | 0.002  | 1.439 |
| 60S ribosomal protein L31<br>OS=Homo sapiens<br>GN=RPL31 PE=1<br>SV=1 | 9 RL31_H<br>UMAN,sp<br> P62900 <br>RL31_MO<br>USE,sp P6<br>2901 RL3<br>1_PIG,sp <br>P62902 R<br>L31_RAT,s<br>p Q1KSC7<br> RL31_M<br>ARMO,sp<br> Q56JX3 <br>RL31_BO<br>VIN,tr B2<br>R4C1 B2R<br>4C1_HUM<br>AN,tr D3Z<br>U04 D3Z<br>U04_RAT,<br>tr D3ZX8<br>7 D3ZX87<br>_RAT,tr D<br>4ABZ9 D4<br>ABZ9_RAT<br>,tr E2R8G<br>3 E2R8G3 | lyTLV<br>TYVP<br>VTTF<br>k | 55% | 27.5 | 49.25735 | Ref | 0.25  | -0.19 | 0.34 | 0.23  | -0.02 | 0.045 | 0.16 | 487  | 426  | 340  | 554   | 564  | 414   | 452  | 487  | 640.1 | 2556.5 | 4 | 0.0101 | 3.966 |

|                                                                       |                                                                                                                                                                                                                                                                                                                                  |                    |     |      |          |     |                                  |                                          |                                               |                                       |                                          |                                          |                                      |                                      |                                  |                                          |                                 |                                       |                                          |                                        |                                  |       |        |   |        |       |
|-----------------------------------------------------------------------|----------------------------------------------------------------------------------------------------------------------------------------------------------------------------------------------------------------------------------------------------------------------------------------------------------------------------------|--------------------|-----|------|----------|-----|----------------------------------|------------------------------------------|-----------------------------------------------|---------------------------------------|------------------------------------------|------------------------------------------|--------------------------------------|--------------------------------------|----------------------------------|------------------------------------------|---------------------------------|---------------------------------------|------------------------------------------|----------------------------------------|----------------------------------|-------|--------|---|--------|-------|
| 60S ribosomal protein L31<br>OS=Homo sapiens<br>GN=RPL31 PE=1<br>SV=1 | 9 RL31_H<br>UMAN,sp<br> P62900 <br>RL31_MO<br>USE,sp P6<br>2901 RL3<br>1_PIG,sp <br>P62902 R<br>L31_RAT,s<br>p Q1KSC7<br> RL31_M<br>ARMO,sp<br> Q56JX3 <br>RL31_BO<br>VIN,tr B2<br>R4C1 B2R<br>4C1_HUM<br>AN,tr D3Z<br>U04 D3Z<br>U04_RAT,<br>tr D3ZX8<br>7 D3ZX87<br>_RAT,tr D<br>4ABZ9 D4<br>ABZ9_RAT<br>,tr E2R8G<br>3 E2R8G3 | nEDE<br>DSP<br>Nk  | 68% | 33.3 | 51.11124 | Ref | 0.18                             | 0.23                                     | 0.5                                           | -0.13                                 | 0.31                                     | -0.23                                    | 0.12                                 | 7080                                 | 7000                             | 7850                                     | 10600                           | 7560                                  | 8960                                     | 6450                                   | 8110                             | 828.4 | 1654.8 | 2 | 0.0152 | 9.2   |
| 60S ribosomal protein L31<br>OS=Homo sapiens<br>GN=RPL31 PE=1<br>SV=1 | 9 RL31_H<br>UMAN,sp<br> P62900 <br>RL31_MO<br>USE,sp P6<br>2901 RL3<br>1_PIG,sp <br>P62902 R<br>L31_RAT,s<br>p Q1KSC7<br> RL31_M<br>ARMO,sp<br> Q56JX3 <br>RL31_BO<br>VIN,tr B2<br>R4C1 B2R<br>4C1_HUM<br>AN,tr D3Z<br>U04 D3Z<br>U04_RAT,<br>tr D3ZX8<br>7 D3ZX87<br>_RAT,tr D<br>4ABZ9 D4<br>ABZ9_RAT<br>,tr E2R8G<br>3 E2R8G3 | nLQT<br>VNV<br>DEN | 95% | 48.3 | 50.82645 | Ref | No<br>Values<br>(0.3656<br>0732) | No<br>Value<br>s<br>(0.24<br>79140<br>5) | No<br>Value<br>s<br>(0.081<br>0.0591<br>3191) | No<br>Values<br>(-<br>0.0591<br>6005) | No<br>Value<br>s<br>(0.136<br>71237<br>) | No<br>Value<br>s<br>(0.073<br>94574<br>) | No<br>Values<br>(0.084<br>81974<br>) | No<br>Values<br>(0.163<br>21754<br>) | No<br>Values<br>(0.365607<br>32) | No<br>Value<br>s<br>(0.24<br>79140<br>5) | No<br>Values<br>(0.0813<br>191) | No<br>Values<br>(-<br>0.059160<br>05) | No<br>Value<br>s<br>(0.13<br>67123<br>7) | No<br>Values<br>(0.073<br>94574<br>74) | No<br>Values<br>(0.084819<br>74) | 725.4 | 1448.7 | 2 | 0.0058 | 4.026 |

|                                                                       |                                                                                                                                                                                                                                                                                                                                  |                    |     |      |          |     |       |       |       |        |       |       |       |     |     |     |      |     |     |     |     |       |        |   |        |       |
|-----------------------------------------------------------------------|----------------------------------------------------------------------------------------------------------------------------------------------------------------------------------------------------------------------------------------------------------------------------------------------------------------------------------|--------------------|-----|------|----------|-----|-------|-------|-------|--------|-------|-------|-------|-----|-----|-----|------|-----|-----|-----|-----|-------|--------|---|--------|-------|
| 60S ribosomal protein L31<br>OS=Homo sapiens<br>GN=RPL31 PE=1<br>SV=1 | 9 RL31_H<br>UMAN,sp<br> P62900 <br>RL31_MO<br>USE,sp P6<br>2901 RL3<br>1_PIG,sp <br>P62902 R<br>L31_RAT,s<br>p Q1KSC7<br> RL31_M<br>ARMO,sp<br> Q56JX3 <br>RL31_BO<br>VIN,tr B2<br>R4C1 B2R<br>4C1_HUM<br>AN,tr D3Z<br>U04 D3Z<br>U04_RAT,<br>tr D3ZX8<br>7 D3ZX87<br>_RAT,tr D<br>4ABZ9 D4<br>ABZ9_RAT<br>,tr E2R8G<br>3 E2R8G3 | nLQT<br>VNV<br>DEN | 91% | 41.5 | 50.67844 | Ref | 0.028 | 0.48  | -0.05 | 0.013  | -0.29 | 0.013 | 0.037 | 554 | 309 | 458 | 357  | 411 | 290 | 374 | 378 | 725.4 | 1448.7 | 2 | 0.0128 | 8.827 |
| 60S ribosomal protein L31<br>OS=Homo sapiens<br>GN=RPL31 PE=1<br>SV=1 | 9 RL31_H<br>UMAN,sp<br> P62900 <br>RL31_MO<br>USE,sp P6<br>2901 RL3<br>1_PIG,sp <br>P62902 R<br>L31_RAT,s<br>p Q1KSC7<br> RL31_M<br>ARMO,sp<br> Q56JX3 <br>RL31_BO<br>VIN,tr B2<br>R4C1 B2R<br>4C1_HUM<br>AN,tr D3Z<br>U04 D3Z<br>U04_RAT,<br>tr D3ZX8<br>7 D3ZX87<br>_RAT,tr D<br>4ABZ9 D4<br>ABZ9_RAT<br>,tr E2R8G<br>3 E2R8G3 | nLQT<br>VNV<br>DEN | 95% | 70.8 | 50.68498 | Ref | 0.58  | -0.02 | 0.55  | -0.028 | -0.15 | -0.37 | 0.047 | 795 | 863 | 616 | 1030 | 759 | 608 | 545 | 724 | 725.4 | 1448.7 | 2 | 0.0123 | 8.482 |

|                                                                       |                                                                                                                                                                                                                           |                   |     |      |          |     |       |       |       |        |       |       |       |       |      |       |       |       |       |       |       |       |        |   |        |       |
|-----------------------------------------------------------------------|---------------------------------------------------------------------------------------------------------------------------------------------------------------------------------------------------------------------------|-------------------|-----|------|----------|-----|-------|-------|-------|--------|-------|-------|-------|-------|------|-------|-------|-------|-------|-------|-------|-------|--------|---|--------|-------|
| 60S ribosomal protein L31<br>OS=Homo sapiens<br>GN=RPL31 PE=1<br>SV=1 | 9 RL31_HUMAN,sp P62900 RL31_MOUSE,sp P62901 RL31_PIG,sp P62902 RL31_RAT,sp Q1KSC7 RL31_MARMO,sp Q56JX3 RL31_BOVIN,tr B2R4C1 B2R4C1_HUMAN,tr D3ZU04 D3ZU04_RAT,tr D3ZX87 D3ZX87_RAT,tr D44ABZ9 D4ABZ9_RAT,tr E2R8G3 E2R8G3 | nLQTVNVV          | 95% | 50.7 | 50.65356 | Ref | 0.66  | -0.36 | 0.33  | -0.07  | -0.07 | -0.3  | 0.022 | 831   | 775  | 416   | 750   | 627   | 549   | 488   | 605   | 725.4 | 1448.7 | 2 | 0.0118 | 8.151 |
| Calpastatin isoform II<br>OS=Ovis aries<br>GN=CAST PE=2<br>SV=1       | tr C3V6M4 C3V6M4_SHEEP                                                                                                                                                                                                    | cGEDEETVPSEYR     | 95% | 45.4 | 44.78394 | Ref | -0.41 | -0.35 | 0.034 | 0.07   | 0.45  | -0.43 | 0.24  | 14000 | 8880 | 10100 | 14700 | 16600 | 18800 | 10700 | 17000 | 932.4 | 1862.8 | 2 | 0.0113 | 6.074 |
| Calpastatin isoform II<br>OS=Ovis aries<br>GN=CAST PE=2<br>SV=1       | tr C3V6M4 C3V6M4_SHEEP                                                                                                                                                                                                    | dFTVPSDTSSPQFEDAK | 81% | 39.1 | 53.52225 | Ref | -0.52 | -0.51 | 0.21  | 0.29   | 0.76  | -1.3  | 0.24  | 780   | 554  | 603   | 1120  | 1300  | 1570  | 406   | 1140  | 1240  | 2478.2 | 2 | 0.0315 | 12.7  |
| Calpastatin isoform II<br>OS=Ovis aries<br>GN=CAST PE=2<br>SV=1       | tr C3V6M4 C3V6M4_SHEEP                                                                                                                                                                                                    | ePLPPLSEDFLLDALSK | 95% | 58.8 | 53.98809 | Ref | -0.14 | -0.3  | -0.03 | -0.034 | 0.38  | -0.51 | 0.35  | 1560  | 1260 | 1220  | 1650  | 1810  | 2110  | 1190  | 2140  | 831.5 | 2491.4 | 3 | 0.0191 | 7.663 |

|                                                                 |                                |                                        |     |      |          |     |       |       |       |        |       |       |       |       |       |       |       |       |       |       |       |       |        |   |        |       |
|-----------------------------------------------------------------|--------------------------------|----------------------------------------|-----|------|----------|-----|-------|-------|-------|--------|-------|-------|-------|-------|-------|-------|-------|-------|-------|-------|-------|-------|--------|---|--------|-------|
| Calpastatin isoform<br>II OS=Ovis aries<br>GN=CAST PE=2<br>SV=1 | tr C3V6M<br>4 C3V6M<br>4_SHEEP | kcGE<br>DEET<br>VPSE<br>YR             | 58% | 32.2 | 51.45927 | Ref | -0.22 | -0.13 | -0.02 | 0.035  | 0.35  | -0.55 | 0.22  | 5420  | 3980  | 4610  | 5570  | 6370  | 6930  | 3880  | 6560  | 766   | 2295.1 | 3 | 0.019  | 8.258 |
| Calpastatin isoform<br>II OS=Ovis aries<br>GN=CAST PE=2<br>SV=1 | tr C3V6M<br>4 C3V6M<br>4_SHEEP | sQD<br>EISG<br>GGk                     | 95% | 50.1 | 52.25351 | Ref | -0.45 | -0.4  | 0.18  | 0.08   | 0.62  | -0.9  | 0.14  | 7370  | 4360  | 4870  | 8170  | 8420  | 10700 | 3890  | 7930  | 793.4 | 1584.8 | 2 | 0.027  | 17    |
| Calpastatin isoform<br>II OS=Ovis aries<br>GN=CAST PE=2<br>SV=1 | tr C3V6M<br>4 C3V6M<br>4_SHEEP | sSS<br>MNP<br>TEAK                     | 73% | 36.5 | 52.60055 | Ref | -0.17 | -0.33 | -0.07 | -0.11  | 0.73  | -0.56 | 0.06  | 31000 | 23900 | 23200 | 31200 | 33500 | 52300 | 22400 | 34200 | 554   | 1658.9 | 3 | 0.0076 | 4.587 |
| Calpastatin isoform<br>II OS=Ovis aries<br>GN=CAST PE=2<br>SV=1 | tr C3V6M<br>4 C3V6M<br>4_SHEEP | tEAS<br>PAA<br>APV<br>PVAE<br>DVP<br>R | 89% | 45.6 | 54.05328 | Ref | 0.23  | 0.65  | -0.37 | -0.36  | -0.57 | 0.35  | -0.23 | 629   | 763   | 1110  | 614   | 683   | 515   | 1020  | 677   | 694.4 | 2080.1 | 3 | 0.0156 | 7.496 |
| Calpastatin isoform<br>II OS=Ovis aries<br>GN=CAST PE=2<br>SV=1 | tr C3V6M<br>4 C3V6M<br>4_SHEEP | tEAS<br>PAA<br>APV<br>PVAE<br>DVP<br>R | 95% | 109  | 54.07374 | Ref | -0.38 | -0.29 | 0.23  | -0.034 | 0.51  | -0.69 | 0.43  | 3640  | 3020  | 3470  | 5620  | 5150  | 6560  | 2970  | 6420  | 1041  | 2080.1 | 2 | 0.0139 | 6.671 |
| Calpastatin isoform<br>II OS=Ovis aries<br>GN=CAST PE=2<br>SV=1 | tr C3V6M<br>4 C3V6M<br>4_SHEEP | VTTS<br>SASA<br>Sk                     | 95% | 64.8 | 52.34419 | Ref | -0.32 | -0.52 | 0.005 | -0.004 | 0.66  | -0.65 | 0.14  | 5310  | 3330  | 3160  | 5080  | 5570  | 7680  | 3250  | 5590  | 773.9 | 1545.9 | 2 | 0.0143 | 9.222 |

|                                                                           |                                                                                                                                                                                              |                 |     |      |          |     |                           |                             |       |                            |                          |                         |                            |                            |                         |                         |                          |     |        |       |       |      |   |        |       |
|---------------------------------------------------------------------------|----------------------------------------------------------------------------------------------------------------------------------------------------------------------------------------------|-----------------|-----|------|----------|-----|---------------------------|-----------------------------|-------|----------------------------|--------------------------|-------------------------|----------------------------|----------------------------|-------------------------|-------------------------|--------------------------|-----|--------|-------|-------|------|---|--------|-------|
| Far upstream element-binding protein 1 OS=Homo sapiens GN=FUBP1 PE=1 SV=3 | sp Q96AE4 FUBP1_HUMAN, tr B4DT31 B4DT31_HUMAN, tr F1MX51 F1MX51_BOVIN, tr F1S9S9 F1S9S9_PIG, tr F6X888 F6X888_CALJA, tr F6ZHP9 F6ZHP9_CALJA, tr F6ZYU6 F6ZYU6_HORSE, tr F7HB82 F7HB82_MALCMU | cQHA AEIITDL LR | 59% | 33.9 | 53.01201 | Ref | Value Missing (-0.551455) | Value Missing (-0.36)       | 0.07  | Value Missing (-0.7803505) | Value Missing (-0.35433) | Value Missing (-0.1535) | Value Missing (-0.1134367) | Value Missing (-0.1153505) | Value Missing (-0.1273) | Value Missing (-0.6117) | Value Missing (-0.18319) | 3   | 0.0098 | 5.362 |       |      |   |        |       |
| Far upstream element-binding protein 1 OS=Homo sapiens GN=FUBP1 PE=1 SV=3 | sp Q96AE4 FUBP1_HUMAN, tr B4DT31 B4DT31_HUMAN, tr F1MX51 F1MX51_BOVIN, tr F1S9S9 F1S9S9_PIG, tr F6X888 F6X888_CALJA, tr F6ZHP9 F6ZHP9_CALJA, tr F6ZYU6 F6ZYU6_HORSE, tr F7HB82 F7HB82_MALCMU | cQHA AEIITDL LR | 94% | 49.9 | 53.05846 | Ref | Value Missing (-0.032)    | Value Missing (-0.30811998) | -0.12 | -0.093                     | 0.044                    | -0.27                   | -0.1                       | 501                        | 390                     | 427                     | 480                      | 460 | 387    | 432   | 611.7 | 1832 | 3 | 0.0072 | 3.954 |



|                                                                                                  |                                                                                                                                                                                                                                                                |                                     |            |             |                 |            |               |              |              |               |             |              |             |              |              |              |              |              |              |              |               |              |               |          |               |              |
|--------------------------------------------------------------------------------------------------|----------------------------------------------------------------------------------------------------------------------------------------------------------------------------------------------------------------------------------------------------------------|-------------------------------------|------------|-------------|-----------------|------------|---------------|--------------|--------------|---------------|-------------|--------------|-------------|--------------|--------------|--------------|--------------|--------------|--------------|--------------|---------------|--------------|---------------|----------|---------------|--------------|
| <p>Far upstream<br/>element-binding<br/>protein 1 OS=Homo<br/>sapiens GN=FUBP1<br/>PE=1 SV=3</p> | <p>sp Q96AE4 FUBP1_HUMAN,transcript B4DT31 B4DT31_HUMAN,transcript F1MX51 F1MX51_BOVIN,transcript F1S9S9 F1S9S9_PIG,transcript F6X888 F6X888_CALJA,transcript F6ZHP9 F6ZHP9_CALJA,transcript F6ZYU6 F6ZYU6_HORSE,transcript F7HB82 F7HB82_MAITDL</p>           | <p>cQH<br/>AAEI<br/>ITDL<br/>LR</p> | <p>89%</p> | <p>44.3</p> | <p>53.06455</p> | <p>Ref</p> | <p>-0.15</p>  | <p>-0.26</p> | <p>-0.19</p> | <p>-0.042</p> | <p>0.28</p> | <p>-0.05</p> | <p>0.15</p> | <p>171</p>   | <p>178</p>   | <p>179</p>   | <p>212</p>   | <p>258</p>   | <p>283</p>   | <p>234</p>   | <p>268</p>    | <p>611.7</p> | <p>1832</p>   | <p>3</p> | <p>0.0082</p> | <p>4.462</p> |
| <p>Far upstream<br/>element-binding<br/>protein 1 OS=Homo<br/>sapiens GN=FUBP1<br/>PE=1 SV=3</p> | <p>sp Q96AE4 FUBP1_HUMAN,transcript B4DT31 B4DT31_HUMAN,transcript F1MX51 F1MX51_BOVIN,transcript F1S9S9 F1S9S9_PIG,transcript F6X888 F6X888_CALJA,transcript F6ZHP9 F6ZHP9_CALJA,transcript F6ZYU6 F6ZYU6_HORSE,transcript F7HB82 F7HB82_MAITDPQ<br/>QIDY</p> | <p>gTPQ<br/>QIDY<br/>AR</p>         | <p>74%</p> | <p>35.5</p> | <p>51.77643</p> | <p>Ref</p> | <p>-0.066</p> | <p>-0.27</p> | <p>-0.15</p> | <p>-0.13</p>  | <p>0.38</p> | <p>-0.52</p> | <p>0.13</p> | <p>86600</p> | <p>76700</p> | <p>72100</p> | <p>88100</p> | <p>98400</p> | <p>1E+05</p> | <p>68500</p> | <p>107000</p> | <p>726.9</p> | <p>1451.8</p> | <p>2</p> | <p>0.0107</p> | <p>7.382</p> |

|                                                                                       |                                                                                                                                                                                                                                               |                                          |     |      |          |     |       |       |       |       |      |       |       |       |      |      |       |       |       |      |       |       |        |   |        |       |
|---------------------------------------------------------------------------------------|-----------------------------------------------------------------------------------------------------------------------------------------------------------------------------------------------------------------------------------------------|------------------------------------------|-----|------|----------|-----|-------|-------|-------|-------|------|-------|-------|-------|------|------|-------|-------|-------|------|-------|-------|--------|---|--------|-------|
| Far upstream<br>element-binding<br>protein 1 OS=Homo<br>sapiens GN=FUBP1<br>PE=1 SV=3 | sp Q96AE4 FUBP1_HUMAN,transcript B4DT31 B4DT31_HUMAN,transcript F1MX51 F1MX51_BOVIN,transcript F1S9S9 F1S9S9_PIG,transcript F6X888 F6X888_CALJA,transcript F6ZHP9 F6ZHP9_CALJA,transcript F6ZYU6 F6ZYU6_HORSE,transcript F7HB82 F7HB82_MALCMU | iGGD<br>AGT<br>SLNS<br>nDY<br>GYG<br>GQk | 95% | 60.8 | 53.71275 | Ref | -0.12 | -0.19 | 0.039 | -0.38 | 0.22 | -0.34 | -0.03 | 5170  | 3780 | 3900 | 5130  | 4230  | 5600  | 3960 | 4890  | 861.8 | 2582.3 | 3 | 0.0161 | 6.213 |
| Far upstream<br>element-binding<br>protein 1 OS=Homo<br>sapiens GN=FUBP1<br>PE=1 SV=3 | sp Q96AE4 FUBP1_HUMAN,transcript B4DT31 B4DT31_HUMAN,transcript F1MX51 F1MX51_BOVIN,transcript F1S9S9 F1S9S9_PIG,transcript F6X888 F6X888_CALJA,transcript F6ZHP9 F6ZHP9_CALJA,transcript F6ZYU6 F6ZYU6_HORSE,transcript F7HB82 F7HB82_MALCMU | iGGN<br>EGID<br>VPIP<br>R                | 95% | 53.9 | 52.73966 | Ref | -0.12 | -0.47 | -0.13 | -0.14 | 0.35 | -0.6  | 0.2   | 11600 | 8610 | 7330 | 10400 | 11400 | 14000 | 7520 | 13100 | 821   | 1639.9 | 2 | 0.0124 | 7.576 |



|                                                                           |                                                                                                                                                                                        |                                                      |     |      |          |     |       |       |       |       |       |       |       |       |       |       |       |       |       |       |       |       |        |   |        |       |
|---------------------------------------------------------------------------|----------------------------------------------------------------------------------------------------------------------------------------------------------------------------------------|------------------------------------------------------|-----|------|----------|-----|-------|-------|-------|-------|-------|-------|-------|-------|-------|-------|-------|-------|-------|-------|-------|-------|--------|---|--------|-------|
| Far upstream element-binding protein 1 OS=Homo sapiens GN=FUBP1 PE=1 SV=3 | sp Q96AE4 FUBP1_HUMAN, tr B4DT31 B4DT31_HUMAN, tr F1MX51 F1MX51_BOVIN, tr F1S9S9 F1S9S9_PIG, tr F6X88 F6X88_CALJA, tr F6ZHP9 F6ZHP9_CALJA, tr F6ZYU6 F6ZYU6_HORSE, tr F7HB82 F7HB82_MA | qQA<br>AYYA<br>QTSP<br>QG<br>MPQ<br>HPP<br>APQ<br>GQ | 87% | 43.6 | 53.47976 | Ref | -0.13 | 0.73  | -0.32 | -0.12 | -0.13 | -0.44 | -0.22 | 929   | 894   | 1760  | 958   | 1210  | 1050  | 887   | 1020  | 962.5 | 2884.4 | 3 | 0.0179 | 6.189 |
| Uncharacterized protein OS=Sus scrofa GN=Ssc.53948 PE=3 SV=1              | tr F2Z5C1 F2Z5C1_PIG, tr F7CL15 F7CL15_HORSE                                                                                                                                           | gAG<br>TDD<br>HTLI<br>R                              | 95% | 54.6 | 51.51823 | Ref | -0.3  | -0.32 | -0.04 | -0.14 | -0.41 | -0.32 | -0.76 | 78600 | 58000 | 61900 | 84400 | 86400 | 63000 | 69700 | 51100 | 487.3 | 1458.8 | 3 | 0.013  | 8.885 |
| Uncharacterized protein OS=Sus scrofa GN=Ssc.53948 PE=3 SV=1              | tr F2Z5C1 F2Z5C1_PIG, tr F7CL15 F7CL15_HORSE                                                                                                                                           | gAG<br>TDD<br>HTLI<br>R                              | 76% | 35.8 | 51.73798 | Ref | -0.28 | -0.2  | -0.33 | -0.22 | -0.45 | -0.33 | -0.48 | 12500 | 8930  | 10300 | 10500 | 12500 | 9260  | 10500 | 9460  | 730.4 | 1458.8 | 2 | 0.0112 | 7.675 |
| Uncharacterized protein OS=Sus scrofa GN=Ssc.53948 PE=3 SV=1              | tr F2Z5C1 F2Z5C1_PIG, tr F7CL15 F7CL15_HORSE                                                                                                                                           | gAG<br>TDEK                                          | 53% | 31   | 51.10866 | Ref | -0.54 | -0.19 | -0.22 | -0.14 | -0.42 | -0.23 | -0.78 | 23000 | 12600 | 17400 | 19200 | 22400 | 16100 | 19200 | 13000 | 429.2 | 1284.7 | 3 | 0.0016 | 1.27  |

|                                                                 |                                             |                              |     |      |          |     |       |       |       |       |       |       |       |       |      |      |       |       |      |       |      |       |        |   |        |       |
|-----------------------------------------------------------------|---------------------------------------------|------------------------------|-----|------|----------|-----|-------|-------|-------|-------|-------|-------|-------|-------|------|------|-------|-------|------|-------|------|-------|--------|---|--------|-------|
| Uncharacterized protein OS=Sus scrofa<br>GN=Ssc.53948 PE=3 SV=1 | tr F2Z5C1 F2Z5C1_PIG,tr F7CL15 F7CL15_HORSE | gLGT<br>DEES<br>ILTLL<br>TSR | 95% | 91.3 | 53.74013 | Ref | -0.45 | -0.41 | -0.07 | -0.09 | -0.4  | -0.24 | -0.44 | 3060  | 2210 | 2460 | 3490  | 3800  | 2690 | 3130  | 2690 | 1005  | 2008.1 | 2 | 0.0091 | 4.547 |
| Uncharacterized protein OS=Sus scrofa<br>GN=Ssc.53948 PE=3 SV=1 | tr F2Z5C1 F2Z5C1_PIG,tr F7CL15 F7CL15_HORSE | gTVT<br>DFP<br>GFD<br>ER     | 90% | 40.4 | 50.71632 | Ref | -0.55 | -0.31 | 0.009 | -0.11 | -0.47 | -0.4  | -0.53 | 13000 | 7730 | 9950 | 13900 | 14100 | 9590 | 10500 | 9530 | 822.9 | 1643.8 | 2 | 0.0118 | 7.187 |
| Uncharacterized protein OS=Sus scrofa<br>GN=Ssc.53948 PE=3 SV=1 | tr F2Z5C1 F2Z5C1_PIG,tr F7CL15 F7CL15_HORSE | IIVAL<br>MkP<br>SR           | 91% | 39.7 | 46.96278 | Ref | 0.015 | -0.09 | -0.78 | -0.27 | -0.45 | -0.32 | -1.2  | 6460  | 4510 | 4560 | 3170  | 4980  | 3820 | 4370  | 2390 | 579.4 | 1735.1 | 3 | 0.0078 | 4.495 |
| Uncharacterized protein OS=Sus scrofa<br>GN=Ssc.53948 PE=3 SV=1 | tr F2Z5C1 F2Z5C1_PIG,tr F7CL15 F7CL15_HORSE | qEIA<br>VAFk                 | 81% | 37.2 | 50.33231 | Ref | -0.19 | -0.32 | -0.21 | -0.25 | -0.41 | -0.14 | -0.49 | 9230  | 8350 | 8310 | 10100 | 10700 | 8430 | 10600 | 8230 | 505.3 | 1512.9 | 3 | 0.0037 | 2.474 |
| Uncharacterized protein OS=Sus scrofa<br>GN=Ssc.53948 PE=3 SV=1 | tr F2Z5C1 F2Z5C1_PIG,tr F7CL15 F7CL15_HORSE | sIPA<br>YLAE<br>TLYY<br>AMK  | 94% | 52.2 | 54.53184 | Ref | 0.12  | -0.11 | -0.64 | -0.17 | -0.74 | -0.14 | -0.64 | 232   | 241  | 222  | 174   | 264   | 155  | 247   | 173  | 781.4 | 2341.3 | 3 | 0.0144 | 6.144 |
| Uncharacterized protein OS=Sus scrofa<br>GN=Ssc.53948 PE=3 SV=1 | tr F2Z5C1 F2Z5C1_PIG,tr F7CL15 F7CL15_HORSE | sIPA<br>YLAE<br>TLYY<br>Amk  | 94% | 51.1 | 54.52113 | Ref | -0.4  | -0.31 | 0.093 | -0.22 | -0.55 | -0.26 | -0.81 | 527   | 342  | 393  | 585   | 520   | 361  | 459   | 312  | 786.8 | 2357.3 | 3 | 0.0148 | 6.286 |

|                                                                                    |                                            |                                  |     |      |          |     |      |       |       |       |       |       |       |       |       |      |       |      |      |       |       |       |        |   |        |       |
|------------------------------------------------------------------------------------|--------------------------------------------|----------------------------------|-----|------|----------|-----|------|-------|-------|-------|-------|-------|-------|-------|-------|------|-------|------|------|-------|-------|-------|--------|---|--------|-------|
| ATP synthase subunit beta, mitochondrial<br>OS=Bos taurus<br>GN=ATP5B PE=1<br>SV=2 | sp P00829 ATPB_BOVIN, tr F1SLA0 F1SLA0_PIG | aDKL<br>AEE<br>HS                | 55% | 32.6 | 52.65596 | Ref | 0.16 | -0.24 | 0.31  | -0.48 | -0.09 | -0.07 | -0.17 | 3630  | 3770  | 3080 | 5090  | 3240 | 3710 | 3920  | 3640  | 804.4 | 1606.9 | 2 | 0.0195 | 12.13 |
| ATP synthase subunit beta, mitochondrial<br>OS=Bos taurus<br>GN=ATP5B PE=1<br>SV=2 | sp P00829 ATPB_BOVIN, tr F1SLA0 F1SLA0_PIG | iGLF<br>GGA<br>GVG<br>k          | 94% | 47.8 | 49.84955 | Ref | 0.22 | -0.32 | -0.13 | -0.41 | -0.13 | 0.056 | -0.02 | 10500 | 9850  | 7320 | 9410  | 8550 | 9040 | 10800 | 10100 | 528.7 | 1583   | 3 | 0.0045 | 2.847 |
| ATP synthase subunit beta, mitochondrial<br>OS=Bos taurus<br>GN=ATP5B PE=1<br>SV=2 | sp P00829 ATPB_BOVIN, tr F1SLA0 F1SLA0_PIG | iMD<br>PNIV<br>GSE<br>HYD<br>VAR | 86% | 42.2 | 53.25817 | Ref | 0.2  | 0.081 | -0.07 | -0.22 | -0.12 | -0.01 | -0.13 | 5240  | 6500  | 6470 | 6550  | 6480 | 6060 | 6840  | 6240  | 707.4 | 2119.1 | 3 | 0.0092 | 4.338 |
| ATP synthase subunit beta, mitochondrial<br>OS=Bos taurus<br>GN=ATP5B PE=1<br>SV=2 | sp P00829 ATPB_BOVIN, tr F1SLA0 F1SLA0_PIG | iMN<br>VIGE<br>PIDE<br>R         | 86% | 40.5 | 52.79665 | Ref | 0.49 | -0.14 | 0.097 | -0.4  | -0.31 | -0.07 | -0.42 | 8960  | 11000 | 7730 | 10200 | 8000 | 7430 | 9130  | 7110  | 845.5 | 1688.9 | 2 | 0.0055 | 3.241 |
| ATP synthase subunit beta, mitochondrial<br>OS=Bos taurus<br>GN=ATP5B PE=1<br>SV=2 | sp P00829 ATPB_BOVIN, tr F1SLA0 F1SLA0_PIG | iVLE<br>VAQ<br>HLGE<br>STVR      | 95% | 61.3 | 52.95903 | Ref | 0.26 | -0.19 | 0.009 | -0.22 | -0.27 | -0.07 | -0.18 | 896   | 899   | 710  | 918   | 864  | 727  | 871   | 805   | 652.4 | 1954.1 | 3 | 0.0078 | 3.984 |

|                                                                                    |                                                        |                                 |     |      |          |     |        |       |       |       |       |       |       |      |      |      |      |      |      |      |      |       |        |   |        |       |
|------------------------------------------------------------------------------------|--------------------------------------------------------|---------------------------------|-----|------|----------|-----|--------|-------|-------|-------|-------|-------|-------|------|------|------|------|------|------|------|------|-------|--------|---|--------|-------|
| ATP synthase subunit beta, mitochondrial<br>OS=Bos taurus<br>GN=ATP5B PE=1<br>SV=2 | sp P00829 ATPB_B<br>OVIN,tr F1<br>1SLA0 F1<br>SLA0_PIG | IVLE<br>VAQ<br>HLGE<br>STVR     | 82% | 40.2 | 52.94601 | Ref | 0.22   | -0.18 | -0.07 | 0.069 | 0.01  | -0.04 | -0.42 | 252  | 294  | 242  | 293  | 355  | 297  | 299  | 229  | 652.4 | 1954.1 | 3 | 0.0076 | 3.892 |
| ATP synthase subunit beta, mitochondrial<br>OS=Bos taurus<br>GN=ATP5B PE=1<br>SV=2 | sp P00829 ATPB_B<br>OVIN,tr F1<br>1SLA0 F1<br>SLA0_PIG | tVLI<br>MELI<br>NNV<br>AK       | 88% | 41.3 | 50.81729 | Ref | -0.068 | -0.23 | 0.2   | 0.11  | -0.81 | 0.13  | -0.43 | 234  | 161  | 157  | 237  | 245  | 113  | 226  | 152  | 689.4 | 2065.2 | 3 | 0.0163 | 7.881 |
| ATP synthase subunit beta, mitochondrial<br>OS=Bos taurus<br>GN=ATP5B PE=1<br>SV=2 | sp P00829 ATPB_B<br>OVIN,tr F1<br>1SLA0 F1<br>SLA0_PIG | tVLI<br>MELI<br>NNV<br>AK       | 65% | 31.9 | 49.75395 | Ref | 0.29   | -0.32 | 0.2   | -0.44 | -0.47 | 0.21  | -0.28 | 253  | 262  | 186  | 300  | 212  | 181  | 303  | 214  | 689.4 | 2065.2 | 3 | #####  | 0.346 |
| ATP synthase subunit beta, mitochondrial<br>OS=Bos taurus<br>GN=ATP5B PE=1<br>SV=2 | sp P00829 ATPB_B<br>OVIN,tr F1<br>1SLA0 F1<br>SLA0_PIG | vALV<br>YGQ<br>MNE<br>PPG<br>AR | 69% | 36   | 53.43728 | Ref | 0.31   | -0.23 | 0.25  | -0.35 | -0.18 | -0.17 | -0.3  | 3680 | 3960 | 2960 | 4630 | 3360 | 3300 | 3470 | 3150 | 953.5 | 1905   | 2 | 0.008  | 4.212 |

|                                                                          |                                                                                                                                                                                                                    |                            |     |      |          |     |      |       |      |        |      |       |      |       |       |       |       |       |       |       |       |     |        |   |        |       |
|--------------------------------------------------------------------------|--------------------------------------------------------------------------------------------------------------------------------------------------------------------------------------------------------------------|----------------------------|-----|------|----------|-----|------|-------|------|--------|------|-------|------|-------|-------|-------|-------|-------|-------|-------|-------|-----|--------|---|--------|-------|
| 14-3-3 protein<br>beta/alpha<br>OS=Pongo abelii<br>GN=YWHAB PE=3<br>SV=1 | 9 1433B_PONAB,sp P31946 1433B_HUMAN,sp P35213 1433B_RAT,sp P68250 1433B_BOVIN,sp P68251 1433B_SHEEP,sp Q4R572 1433B_MAFCA,tr B5BU24 B5BU24_HUMAN,tr D2H6L9 D2H6L9_AILME,tr F1MNP5 F1MNP5_BOVIN,tr F1PKW7 F1PKW7_CA | aVTE<br>QGH<br>ELSN<br>EER | 95% | 61.2 | 51.77721 | Ref | 0.34 | -0.02 | 0.11 | -0.013 | 0.4  | -0.28 | 0.32 | 33600 | 37200 | 31400 | 38500 | 39100 | 45400 | 29600 | 44700 | 635 | 1901.9 | 3 | 0.0143 | 7.524 |
| 14-3-3 protein<br>beta/alpha<br>OS=Pongo abelii<br>GN=YWHAB PE=3<br>SV=1 | 9 1433B_PONAB,sp P31946 1433B_HUMAN,sp P35213 1433B_RAT,sp P68250 1433B_BOVIN,sp P68251 1433B_SHEEP,sp Q4R572 1433B_MAFCA,tr B5BU24 B5BU24_HUMAN,tr D2H6L9 D2H6L9_AILME,tr F1MNP5 F1MNP5_BOVIN,tr F1PKW7 F1PKW7_CA | aVTE<br>QGH<br>ELSN<br>EER | 95% | 53   | 51.80719 | Ref | 0.45 | -0.44 | 0.25 | 0.017  | 0.58 | -0.5  | 0.21 | 2970  | 3420  | 2000  | 3620  | 3390  | 4380  | 2170  | 3500  | 952 | 1901.9 | 2 | 0.0132 | 6.917 |



|                                                                          |                                                                                                                                                                                                                    |                            |     |      |          |     |      |       |       |        |      |       |       |       |       |       |       |       |       |       |       |       |        |   |        |       |
|--------------------------------------------------------------------------|--------------------------------------------------------------------------------------------------------------------------------------------------------------------------------------------------------------------|----------------------------|-----|------|----------|-----|------|-------|-------|--------|------|-------|-------|-------|-------|-------|-------|-------|-------|-------|-------|-------|--------|---|--------|-------|
| 14-3-3 protein<br>beta/alpha<br>OS=Pongo abelii<br>GN=YWHAB PE=3<br>SV=1 | 9 1433B_PONAB,sp P31946 1433B_HUMAN,sp P35213 1433B_RAT,sp P68250 1433B_BOVIN,sp P68251 1433B_SHEEP,sp Q4R572 1433B_MAFCA,tr B5BU24 B5BU24_HUMAN,tr D2H6L9 D2H6L9_AILME,tr F1MNP5 F1MNP5_BOVIN,tr F1PKW7 F1PKW7_CA | aVTE<br>QGH<br>ELSn<br>EER | 86% | 40.2 | 50.95776 | Ref | 0.81 | -0.13 | -0.08 | -0.1   | 0.4  | -0.08 | 0.13  | 20400 | 38800 | 21900 | 25500 | 27600 | 34000 | 25700 | 29300 | 635.3 | 1902.9 | 3 | 0.0153 | 8.014 |
| 14-3-3 protein<br>beta/alpha<br>OS=Pongo abelii<br>GN=YWHAB PE=3<br>SV=1 | 9 1433B_PONAB,sp P31946 1433B_HUMAN,sp P35213 1433B_RAT,sp P68250 1433B_BOVIN,sp P68251 1433B_SHEEP,sp Q4R572 1433B_MAFCA,tr B5BU24 B5BU24_HUMAN,tr D2H6L9 D2H6L9_AILME,tr F1MNP5 F1MNP5_BOVIN,tr F1PKW7 F1PKW7_CA | aVTE<br>QGH<br>ELSn<br>EER | 75% | 35.8 | 51.10782 | Ref | 0.81 | -0.14 | -0.12 | -0.076 | 0.41 | -0.07 | -0.05 | 22500 | 37100 | 20800 | 23700 | 26900 | 32800 | 24600 | 24700 | 635.3 | 1902.9 | 3 | 0.0123 | 6.469 |

|                                                                          |                                                                                                                                                                                                                      |                                   |     |     |      |          |     |      |       |      |      |      |       |       |       |       |       |       |       |       |       |       |       |        |   |        |       |
|--------------------------------------------------------------------------|----------------------------------------------------------------------------------------------------------------------------------------------------------------------------------------------------------------------|-----------------------------------|-----|-----|------|----------|-----|------|-------|------|------|------|-------|-------|-------|-------|-------|-------|-------|-------|-------|-------|-------|--------|---|--------|-------|
| 14-3-3 protein<br>beta/alpha<br>OS=Pongo abelii<br>GN=YWHAB PE=3<br>SV=1 | 9 1433B_PONAB,sp P31946 1433B_HUMAN,sp P35213 1433B_RA T,sp P68250 1433B_BOVIN,sp P68251 1433B_SHEEP,sp Q4R572 1433B_MA CFA,tr B5BU24 B5BU24_HUMAN,tr D2H6L9 D2H6L9_AILME,tr F1MNP5 F1MNP5_BOVIN,tr F1PKW7 F1PKW7_CA | qTTV<br>SNS<br>QQA<br>YQE<br>AFEI | Sk  | 93% | 51.7 | 55.22601 | Ref | 0.55 | -0.2  | 0.11 | 0.04 | 0.29 | -0.18 | 0.096 | 2600  | 3040  | 1970  | 2730  | 2870  | 2980  | 2240  | 2700  | 923.1 | 2766.4 | 3 | 0.021  | 7.58  |
| 14-3-3 protein<br>beta/alpha<br>OS=Pongo abelii<br>GN=YWHAB PE=3<br>SV=1 | 9 1433B_PONAB,sp P31946 1433B_HUMAN,sp P35213 1433B_RA T,sp P68250 1433B_BOVIN,sp P68251 1433B_SHEEP,sp Q4R572 1433B_MA CFA,tr B5BU24 B5BU24_HUMAN,tr D2H6L9 D2H6L9_AILME,tr F1MNP5 F1MNP5_BOVIN,tr F1PKW7 F1PKW7_CA | vSSI                              | EQK | 86% | 38.5 | 50.65972 | Ref | 0.53 | -0.27 | 0.27 | 0.11 | 0.31 | -0.32 | 0.11  | 26200 | 31900 | 20000 | 32500 | 32100 | 32200 | 21700 | 29000 | 756.5 | 1510.9 | 2 | 0.0046 | 3.051 |



|                                                                              |                                                                                                                                                                                                                                                                                                                                   |                                 |     |      |          |     |      |       |      |       |       |       |      |       |       |       |       |       |       |       |       |       |      |   |        |       |
|------------------------------------------------------------------------------|-----------------------------------------------------------------------------------------------------------------------------------------------------------------------------------------------------------------------------------------------------------------------------------------------------------------------------------|---------------------------------|-----|------|----------|-----|------|-------|------|-------|-------|-------|------|-------|-------|-------|-------|-------|-------|-------|-------|-------|------|---|--------|-------|
| 14-3-3 protein<br>beta/alpha<br>OS=Pongo abelii<br>GN=YWHAB PE=3<br>SV=1     | 9 1433B_<br>PONAB,sp<br> P31946 <br>1433B_H<br>UMAN,sp<br> P35213 <br>1433B_RA<br>T,sp P682<br>50 1433B<br>_BOVIN,s<br>p P68251<br> 1433B_S<br>HEEP,sp <br>Q4R572 1<br>433B_MA<br>CFA,tr B5<br>BU24 B5<br>BU24_HU<br>MAN,tr D<br>2H6L9 D2<br>H6L9_AIL<br>ME,tr F1<br>MNP5 F1<br>MNP5_BO<br>VIN,tr F1<br>PKW7 F1<br>PKW7_CA        | YLSE<br>VAS<br>GDN<br>k         | 95% | 61.7 | 53.50502 | Ref | 0.38 | -0.17 | 0.37 | 0.094 | 0.29  | -0.26 | 0.14 | 8030  | 9090  | 6750  | 11100 | 10000 | 10100 | 7150  | 9390  | 896   | 1790 | 2 | 0.0155 | 8.647 |
| 60S ribosomal<br>protein L12<br>OS=Canis familiaris<br>GN=RPL12 PE=1<br>SV=1 | 8 RL12_C<br>ANFA,sp <br>P30050 R<br>L12_HUM<br>AN,sp P3<br>5979 RL1<br>2_MOUSE<br>,sp P6128<br>4 RL12_B<br>OVIN,tr D<br>2H3Y2 D2<br>H3Y2_AIL<br>ME,tr F1<br>RS17 F1R<br>S17_PIG,t<br>r F2X246<br> F2X246_<br>AILME,tr <br>F6RXN0 F<br>6RXN0_C<br>ALJA,tr F<br>6T1A4 F6<br>T1A4_HO<br>RSE,tr F7<br>G7L4 F7G<br>7L4_MAC<br>MU,tr F7 | cTG<br>GEV<br>GAT<br>SALA<br>Pk | 90% | 45.6 | 53.79005 | Ref | 0.36 | 0.072 | 0.24 | 0.039 | 0.006 | 0.26  | 0.21 | 17600 | 18500 | 16400 | 20800 | 19800 | 16900 | 21100 | 20300 | 672.7 | 2015 | 3 | 0.0223 | 11.07 |

|                                                                           |                                                                                                                                                                                                                                                                                                                                                   |                            |     |      |          |     |      |       |      |        |      |       |      |      |      |      |      |      |      |      |      |     |      |   |        |       |
|---------------------------------------------------------------------------|---------------------------------------------------------------------------------------------------------------------------------------------------------------------------------------------------------------------------------------------------------------------------------------------------------------------------------------------------|----------------------------|-----|------|----------|-----|------|-------|------|--------|------|-------|------|------|------|------|------|------|------|------|------|-----|------|---|--------|-------|
| 60S ribosomal protein L12<br>OS=Canis familiaris<br>GN=RPL12 PE=1<br>SV=1 | 8 RL12_C<br>ANFA,sp <br>P30050 R<br>L12_HUM<br>AN,sp P3<br>5979 RL1<br>2_MOUSE<br>,sp P6128<br>4 RL12_B<br>OVIN,tr D<br>2H3Y2 D2<br>H3Y2_AIL<br>ME,tr F1<br>RS17 F1R<br>S17_PIG,t<br>r F2X246<br> F2X246_<br>AILME,tr <br>F6RXNO F<br>6RXNO_C<br>ALJA,tr F<br>6T1A4 F6<br>T1A4_HO<br>RSE,tr F7<br>G7L4 F7G<br>7L4_MAC<br>NVD<br>MU,tr F7<br>GR    | eILG<br>TAQ<br>SVGc<br>NVD | 95% | 60.6 | 51.99547 | Ref | 0.46 | -0.05 | 0.43 | -0.015 | 0.23 | -0.1  | 0.31 | 5280 | 6690 | 5070 | 7960 | 6450 | 6690 | 5560 | 7290 | 985 | 1968 | 2 | 0.014  | 7.119 |
| 60S ribosomal protein L12<br>OS=Canis familiaris<br>GN=RPL12 PE=1<br>SV=1 | 8 RL12_C<br>ANFA,sp <br>P30050 R<br>L12_HUM<br>AN,sp P3<br>5979 RL1<br>2_MOUSE<br>,sp P6128<br>4 RL12_B<br>OVIN,tr D<br>2H3Y2 D2<br>H3Y2_AIL<br>ME,tr F1<br>RS17 F1R<br>S17_PIG,t<br>r F2X246<br> F2X246_<br>AILME,tr <br>F6RXNO F<br>6RXNO_C<br>ALJA,tr F<br>6T1A4 F6<br>T1A4_HO<br>RSE,tr F7<br>G7L4 F7G<br>7L4_MAC<br>DEIV<br>MU,tr F7<br>NIAR | hSG<br>NITF<br>DEIV        | 86% | 42.6 | 53.68021 | Ref | 0.28 | 0.036 | 0.12 | 0.035  | 0.25 | 0.041 | 0.32 | 3960 | 3620 | 3320 | 3940 | 4110 | 4170 | 3760 | 4540 | 664 | 1989 | 3 | 0.0118 | 5.941 |

|                                                                           |                                                                                                                                                                                                                                                                                                                                   |                             |     |      |          |     |      |      |      |        |      |       |      |      |      |      |      |      |      |      |      |       |        |   |        |       |
|---------------------------------------------------------------------------|-----------------------------------------------------------------------------------------------------------------------------------------------------------------------------------------------------------------------------------------------------------------------------------------------------------------------------------|-----------------------------|-----|------|----------|-----|------|------|------|--------|------|-------|------|------|------|------|------|------|------|------|------|-------|--------|---|--------|-------|
| 60S ribosomal protein L12<br>OS=Canis familiaris<br>GN=RPL12 PE=1<br>SV=1 | 8 RL12_C<br>ANFA,sp <br>P30050 R<br>L12_HUM<br>AN,sp P3<br>5979 RL1<br>2_MOUSE<br>,sp P6128<br>4 RL12_B<br>OVIN,tr D<br>2H3Y2 D2<br>H3Y2_AIL<br>ME,tr F1<br>RS17 F1R<br>S17_PIG,t<br>r F2X246<br> F2X246_<br>AILME,tr <br>F6RXNO F<br>6RXNO_C<br>ALJA,tr F<br>6T1A4 F6<br>T1A4_HO<br>RSE,tr F7<br>G7L4 F7G<br>7L4_MAC<br>MU,tr F7 | hSG<br>NITF<br>DEIV<br>NIAR | 90% | 44   | 53.70335 | Ref | 0.18 | -0   | 0.51 | -0.006 | 0.19 | 0.05  | 0.24 | 525  | 483  | 462  | 742  | 571  | 572  | 542  | 611  | 498.3 | 1989   | 4 | 0.0124 | 6.256 |
| 60S ribosomal protein L12<br>OS=Canis familiaris<br>GN=RPL12 PE=1<br>SV=1 | 8 RL12_C<br>ANFA,sp <br>P30050 R<br>L12_HUM<br>AN,sp P3<br>5979 RL1<br>2_MOUSE<br>,sp P6128<br>4 RL12_B<br>OVIN,tr D<br>2H3Y2 D2<br>H3Y2_AIL<br>ME,tr F1<br>RS17 F1R<br>S17_PIG,t<br>r F2X246<br> F2X246_<br>AILME,tr <br>F6RXNO F<br>6RXNO_C<br>ALJA,tr F<br>6T1A4 F6<br>T1A4_HO<br>RSE,tr F7<br>G7L4 F7G<br>7L4_MAC<br>MU,tr F7 | hSG<br>NITF<br>DEIV<br>NIAR | 95% | 56.9 | 53.90456 | Ref | 0.46 | 0.15 | 0.27 | -0.063 | 0.21 | -0.02 | 0.49 | 1990 | 3070 | 2680 | 3270 | 2860 | 3020 | 2690 | 3810 | 664   | 1989.1 | 3 | 0.0103 | 5.184 |

|                                                                           |                                                                                                                                                                                                                                                                                                                                   |                             |     |      |          |     |      |       |      |       |       |       |      |       |       |       |       |       |       |       |       |       |        |   |        |       |
|---------------------------------------------------------------------------|-----------------------------------------------------------------------------------------------------------------------------------------------------------------------------------------------------------------------------------------------------------------------------------------------------------------------------------|-----------------------------|-----|------|----------|-----|------|-------|------|-------|-------|-------|------|-------|-------|-------|-------|-------|-------|-------|-------|-------|--------|---|--------|-------|
| 60S ribosomal protein L12<br>OS=Canis familiaris<br>GN=RPL12 PE=1<br>SV=1 | 8 RL12_C<br>ANFA,sp <br>P30050 R<br>L12_HUM<br>AN,sp P3<br>5979 RL1<br>2_MOUSE<br>,sp P6128<br>4 RL12_B<br>OVIN,tr D<br>2H3Y2 D2<br>H3Y2_AIL<br>ME,tr F1<br>RS17 F1R<br>S17_PIG,t<br>r F2X246<br> F2X246_<br>AILME,tr <br>F6RXNO F<br>6RXNO_C<br>ALJA,tr F<br>6T1A4 F6<br>T1A4_HO<br>RSE,tr F7<br>G7L4 F7G<br>7L4_MAC<br>MU,tr F7 | hSG<br>NITF<br>DEIV<br>NIAR | 93% | 49   | 53.68226 | Ref | 0.51 | -0.17 | 0.28 | 0.31  | -0.03 | 0.23  | 0.13 | 207   | 265   | 180   | 276   | 312   | 214   | 268   | 249   | 664   | 1989   | 3 | 0.0107 | 5.399 |
| 60S ribosomal protein L12<br>OS=Canis familiaris<br>GN=RPL12 PE=1<br>SV=1 | 8 RL12_C<br>ANFA,sp <br>P30050 R<br>L12_HUM<br>AN,sp P3<br>5979 RL1<br>2_MOUSE<br>,sp P6128<br>4 RL12_B<br>OVIN,tr D<br>2H3Y2 D2<br>H3Y2_AIL<br>ME,tr F1<br>RS17 F1R<br>S17_PIG,t<br>r F2X246<br> F2X246_<br>AILME,tr <br>F6RXNO F<br>6RXNO_C<br>ALJA,tr F<br>6T1A4 F6<br>T1A4_HO<br>RSE,tr F7<br>G7L4 F7G<br>7L4_MAC<br>MU,tr F7 | iGPL<br>GLSP<br>k           | 86% | 35.4 | 46.22856 | Ref | 0.39 | 0.001 | 0.31 | 0.045 | 0.29  | -0.02 | 0.24 | 13300 | 15200 | 12600 | 17500 | 16000 | 16600 | 14000 | 16600 | 497.3 | 1488.9 | 3 | 0.0043 | 2.87  |

|                                                                           |                                                                                                                                                                                                                                                                                                                                   |                              |     |      |          |     |       |       |      |      |      |       |      |      |       |      |       |       |       |       |       |       |        |   |        |       |
|---------------------------------------------------------------------------|-----------------------------------------------------------------------------------------------------------------------------------------------------------------------------------------------------------------------------------------------------------------------------------------------------------------------------------|------------------------------|-----|------|----------|-----|-------|-------|------|------|------|-------|------|------|-------|------|-------|-------|-------|-------|-------|-------|--------|---|--------|-------|
| 60S ribosomal protein L12<br>OS=Canis familiaris<br>GN=RPL12 PE=1<br>SV=1 | 8 RL12_C<br>ANFA,sp <br>P30050 R<br>L12_HUM<br>AN,sp P3<br>5979 RL1<br>2_MOUSE<br>,sp P6128<br>4 RL12_B<br>OVIN,tr D<br>2H3Y2 D2<br>H3Y2_AIL<br>ME,tr F1<br>RS17 F1R<br>S17_PIG,t<br>r F2X246<br> F2X246_<br>AILME,tr <br>F6RXNO F<br>6RXNO_C<br>ALJA,tr F<br>6T1A4 F6<br>T1A4_HO<br>RSE,tr F7<br>G7L4 F7G<br>7L4_MAC<br>MU,tr F7 | qAQI<br>EVVP<br>SASA<br>Llik | 62% | 29.6 | 50.09238 | Ref | -0.24 | -0.14 | 0.24 | 0.18 | 0.15 | -0.07 | 0.52 | 3030 | 1590  | 1850 | 2700  | 2860  | 2450  | 2190  | 3280  | 569.6 | 2274.4 | 4 | 0.0206 | 9.059 |
| 60S ribosomal protein L12<br>OS=Canis familiaris<br>GN=RPL12 PE=1<br>SV=1 | 8 RL12_C<br>ANFA,sp <br>P30050 R<br>L12_HUM<br>AN,sp P3<br>5979 RL1<br>2_MOUSE<br>,sp P6128<br>4 RL12_B<br>OVIN,tr D<br>2H3Y2 D2<br>H3Y2_AIL<br>ME,tr F1<br>RS17 F1R<br>S17_PIG,t<br>r F2X246<br> F2X246_<br>AILME,tr <br>F6RXNO F<br>6RXNO_C<br>ALJA,tr F<br>6T1A4 F6<br>T1A4_HO<br>RSE,tr F7<br>G7L4 F7G<br>7L4_MAC<br>MU,tr F7 | qAQI<br>EVVP<br>SASA<br>Llik | 92% | 44.3 | 49.75804 | Ref | 0.35  | -0.09 | 0.22 | 0.11 | 0.21 | 0.16  | 0.33 | 9320 | 10600 | 8490 | 11800 | 12100 | 11300 | 11400 | 12700 | 759.1 | 2274.4 | 3 | 0.0158 | 6.965 |



|                                                                         |                        |                  |     |      |          |     |        |       |       |        |      |       |       |       |       |       |       |       |       |       |       |       |        |   |        |       |
|-------------------------------------------------------------------------|------------------------|------------------|-----|------|----------|-----|--------|-------|-------|--------|------|-------|-------|-------|-------|-------|-------|-------|-------|-------|-------|-------|--------|---|--------|-------|
| Heat shock 70kD protein binding protein OS=Bos taurus GN=ST13 PE=2 SV=1 | tr A7E3S8 A7E3S8_BOVIN | alDL FTDA Ik     | 91% | 45.2 | 51.96033 | Ref | 0.018  | -0.51 | -0.01 | -0.14  | 0.24 | -0.48 | 0.19  | 6630  | 4830  | 3630  | 5770  | 5820  | 6580  | 4180  | 6630  | 572.3 | 1714   | 3 | 0.0181 | 10.56 |
| Heat shock 70kD protein binding protein OS=Bos taurus GN=ST13 PE=2 SV=1 | tr A7E3S8 A7E3S8_BOVIN | alEIN PDS AQP Yk | 95% | 50.7 | 53.92761 | Ref | 0.19   | -0.48 | 0.21  | 0.053  | 0.26 | -0.76 | 0.027 | 7340  | 7290  | 4980  | 8990  | 8890  | 8970  | 4610  | 7900  | 1028  | 2053.1 | 2 | 0.0156 | 7.594 |
| Heat shock 70kD protein binding protein OS=Bos taurus GN=ST13 PE=2 SV=1 | tr A7E3S8 A7E3S8_BOVIN | iPPA AHk         | 66% | 32.4 | 50.18726 | Ref | -0.071 | -0.34 | -0.05 | -0.18  | 0.11 | 0.077 | 0.26  | 23400 | 20600 | 18600 | 25500 | 25700 | 27400 | 28000 | 31500 | 447.9 | 1340.8 | 3 | 0.0244 | 18.18 |
| Heat shock 70kD protein binding protein OS=Bos taurus GN=ST13 PE=2 SV=1 | tr A7E3S8 A7E3S8_BOVIN | iPPA AHk         | 76% | 33.7 | 48.79326 | Ref | 0.11   | -0.22 | 0.043 | -0.061 | 0.23 | -0.33 | -0.04 | 45800 | 42800 | 37100 | 49900 | 51200 | 54700 | 38600 | 47000 | 448   | 1340.8 | 3 | 0.0055 | 4.068 |
| Heat shock 70kD protein binding protein OS=Bos taurus GN=ST13 PE=2 SV=1 | tr A7E3S8 A7E3S8_BOVIN | iAILY Ak         | 55% | 24.3 | 44.31911 | Ref | 0.17   | -0.55 | 0.21  | -0.005 | 0.33 | -0.45 | -0.04 | 11200 | 11700 | 7660  | 14600 | 13900 | 15300 | 9260  | 12200 | 700.5 | 1398.9 | 2 | 0.0014 | 0.979 |

|                                                                         |                                                                      |                   |     |      |          |     |        |       |       |        |       |       |       |       |       |       |       |       |       |       |       |       |        |   |        |       |
|-------------------------------------------------------------------------|----------------------------------------------------------------------|-------------------|-----|------|----------|-----|--------|-------|-------|--------|-------|-------|-------|-------|-------|-------|-------|-------|-------|-------|-------|-------|--------|---|--------|-------|
| Heat shock 70kD protein binding protein OS=Bos taurus GN=ST13 PE=2 SV=1 | tr A7E3S8 A7E3S8_BOVIN                                               | IDYD EDAS AML k   | 95% | 59.4 | 53.09852 | Ref | 0.13   | -0.45 | 0.085 | -0.064 | 0.18  | -0.54 | 0.078 | 23100 | 19200 | 13900 | 22700 | 22600 | 23400 | 14800 | 22500 | 660.3 | 1978   | 3 | 0.0165 | 8.314 |
| Heat shock 70kD protein binding protein OS=Bos taurus GN=ST13 PE=2 SV=1 | tr A7E3S8 A7E3S8_BOVIN                                               | IDYD EDAS AML k   | 82% | 40.4 | 53.26069 | Ref | 0.2    | -0.08 | 0.088 | -0.13  | 0.11  | -0.39 | -0.13 | 8640  | 8360  | 7440  | 9400  | 8920  | 9160  | 6800  | 8070  | 660.3 | 1978   | 3 | 0.0123 | 6.192 |
| Heat shock 70kD protein binding protein OS=Bos taurus GN=ST13 PE=2 SV=1 | tr A7E3S8 A7E3S8_BOVIN                                               | vAAI DAL NDG ELQk | 88% | 44.1 | 53.54222 | Ref | -0.012 | -0.09 | 0.058 | -0.066 | -0.06 | 0.006 | 0.19  | 7590  | 7870  | 8080  | 10100 | 10200 | 8920  | 9750  | 11000 | 689.1 | 2064.1 | 3 | 0.0184 | 8.889 |
| Heat shock 70kD protein binding protein OS=Bos taurus GN=ST13 PE=2 SV=1 | tr A7E3S8 A7E3S8_BOVIN                                               | vAAI DAL NDG ELQk | 63% | 35.1 | 53.45709 | Ref | 0.014  | -0.2  | 0.19  | -0.18  | -0    | -0.07 | 0.25  | 5380  | 5740  | 5370  | 7880  | 6710  | 6650  | 6650  | 8190  | 689.1 | 2064.2 | 3 | 0.0163 | 7.915 |
| Microtubule-associated protein 4 OS=Bos taurus GN=MAP4 PE=1 SV=1        | sp P36225 MAP4_BOVIN, tr F1MAZ1 F1MAZ1_BOVIN, tr F1MAZ3 F1MAZ3_BOVIN | dVES SIES DMA LVk | 81% | 41   | 54.10178 | Ref | -0.14  | -0.22 | -0.27 | -0.32  | -0.3  | -0.4  | -0.4  | 4670  | 3940  | 4050  | 4390  | 4650  | 4130  | 4020  | 4000  | 711   | 2130.1 | 3 | 0.0193 | 9.076 |

|                                                                           |                                                                      |                                   |     |      |          |     |       |       |       |       |       |       |       |       |      |       |       |       |       |       |       |       |        |   |        |       |
|---------------------------------------------------------------------------|----------------------------------------------------------------------|-----------------------------------|-----|------|----------|-----|-------|-------|-------|-------|-------|-------|-------|-------|------|-------|-------|-------|-------|-------|-------|-------|--------|---|--------|-------|
| Microtubule-associated protein 4<br>OS=Bos taurus<br>GN=MAP4 PE=1<br>SV=1 | sp P36225 MAP4_BOVIN, tr F1MAZ1 F1MAZ1_BOVIN, tr F1MAZ3 F1MAZ3_BOVIN | dVES<br>SIES<br>DMA<br>LVk        | 53% | 34.1 | 54.20454 | Ref | -0.22 | -0.31 | -0.37 | -0.36 | -0.25 | -0.52 | -0.43 | 3740  | 2400 | 2440  | 2630  | 2920  | 2760  | 2370  | 2520  | 711.1 | 2130.1 | 3 | 0.0058 | 2.714 |
| Microtubule-associated protein 4<br>OS=Bos taurus<br>GN=MAP4 PE=1<br>SV=1 | sp P36225 MAP4_BOVIN, tr F1MAZ1 F1MAZ1_BOVIN, tr F1MAZ3 F1MAZ3_BOVIN | dVVL<br>PVQ<br>TEET<br>AVk        | 85% | 41.3 | 52.97507 | Ref | -0.6  | 0.09  | -0.29 | -0.3  | -0.22 | -0.42 | -0.43 | 12200 | 7260 | 12700 | 10900 | 12000 | 11100 | 10100 | 9920  | 712.7 | 2135.2 | 3 | 0.0173 | 8.085 |
| Microtubule-associated protein 4<br>OS=Bos taurus<br>GN=MAP4 PE=1<br>SV=1 | sp P36225 MAP4_BOVIN, tr F1MAZ1 F1MAZ1_BOVIN, tr F1MAZ3 F1MAZ3_BOVIN | hSLP<br>TDE<br>DSVL<br>ELEE<br>Qk | 89% | 46.7 | 54.9865  | Ref | -0.49 | 0.074 | -0.41 | -0.49 | -0.19 | -0.36 | -0.14 | 2320  | 1640 | 2630  | 2110  | 2210  | 2370  | 2200  | 2530  | 859.8 | 2576.3 | 3 | 0.015  | 5.817 |
| Microtubule-associated protein 4<br>OS=Bos taurus<br>GN=MAP4 PE=1<br>SV=1 | sp P36225 MAP4_BOVIN, tr F1MAZ1 F1MAZ1_BOVIN, tr F1MAZ3 F1MAZ3_BOVIN | sTTT<br>SSVk                      | 79% | 36.6 | 51.70696 | Ref | -0.73 | -0.13 | -0.44 | -0.26 | -0.07 | -0.47 | -0.19 | 11300 | 5720 | 9430  | 8550  | 10600 | 10600 | 8410  | 10100 | 709.9 | 1417.8 | 2 | 0.0023 | 1.617 |
| Microtubule-associated protein 4<br>OS=Bos taurus<br>GN=MAP4 PE=1<br>SV=1 | sp P36225 MAP4_BOVIN, tr F1MAZ1 F1MAZ1_BOVIN, tr F1MAZ3 F1MAZ3_BOVIN | sTTT<br>SSVk                      | 87% | 39.5 | 51.48186 | Ref | -0.74 | 0.034 | -0.39 | -0.21 | -0.05 | -0.54 | -0.44 | 18200 | 9250 | 17200 | 14400 | 17900 | 17500 | 13000 | 13900 | 709.9 | 1417.8 | 2 | 0.0045 | 3.168 |
| Microtubule-associated protein 4<br>OS=Bos taurus<br>GN=MAP4 PE=1<br>SV=1 | sp P36225 MAP4_BOVIN, tr F1MAZ1 F1MAZ1_BOVIN, tr F1MAZ3 F1MAZ3_BOVIN | tDYI<br>PLLD<br>VDEK              | 83% | 40.1 | 53.79158 | Ref | -0.85 | -0.11 | -0.42 | -0.25 | -0.03 | -0.48 | -0.28 | 9190  | 4140 | 7480  | 6790  | 8430  | 8570  | 6520  | 7470  | 1015  | 2028.1 | 2 | 0.0165 | 8.108 |

|                                                                             |                                                                    |                                       |     |      |          |     |       |       |       |       |       |       |       |       |       |       |       |       |       |       |       |       |        |   |        |       |
|-----------------------------------------------------------------------------|--------------------------------------------------------------------|---------------------------------------|-----|------|----------|-----|-------|-------|-------|-------|-------|-------|-------|-------|-------|-------|-------|-------|-------|-------|-------|-------|--------|---|--------|-------|
| Microtubule-associated protein 4<br>OS=Bos taurus<br>GN=MAP4 PE=1<br>SV=1   | sp P36225 MAP4_BOVIN,tr F1MAZ1 F1MAZ1_BOVIN,tr F1MAZ3 F1MAZ3_BOVIN | vGSL<br>DNL<br>GHL<br>PAG<br>GAV<br>k | 68% | 35.9 | 53.16507 | Ref | -0.56 | -0.24 | -0.38 | -0.18 | -0.04 | -0.57 | -0.19 | 22600 | 13800 | 18700 | 19100 | 24100 | 23200 | 16800 | 21800 | 733.8 | 2198.2 | 3 | 0.0229 | 10.4  |
| Microtubule-associated protein 4<br>OS=Bos taurus<br>GN=MAP4 PE=1<br>SV=1   | sp P36225 MAP4_BOVIN,tr F1MAZ1 F1MAZ1_BOVIN,tr F1MAZ3 F1MAZ3_BOVIN | vGSL<br>DNL<br>GHL<br>PAG<br>GAV<br>k | 95% | 52.3 | 53.16807 | Ref | -0.57 | -0.15 | -0.28 | -0.31 | -0.08 | -0.45 | -0.35 | 17400 | 10200 | 14800 | 15200 | 16300 | 16800 | 13500 | 14400 | 733.8 | 2198.2 | 3 | 0.0234 | 10.65 |
| Superoxide dismutase (Fragment)<br>OS=Capra hircus<br>GN=MnSOD PE=2<br>SV=1 | tr C6KGS6 C6KGS6_CAPHI,tr C8BKD6 C8BKD6_SHEEP                      | gDVT<br>AQIA<br>LQP<br>ALK            | 95% | 57   | 51.10718 | Ref | 0.38  | -0.66 | -0.03 | -0.36 | -0.05 | -0.89 | -0.05 | 37400 | 36400 | 19200 | 33200 | 29200 | 31600 | 18400 | 32800 | 678.4 | 2032.2 | 3 | 0.0162 | 7.975 |
| Superoxide dismutase (Fragment)<br>OS=Capra hircus<br>GN=MnSOD PE=2<br>SV=1 | tr C6KGS6 C6KGS6_CAPHI,tr C8BKD6 C8BKD6_SHEEP                      | gDVT<br>AQIA<br>LQP<br>ALK            | 95% | 77.5 | 50.99767 | Ref | 0.38  | -0.76 | 0.13  | -0.16 | -0.06 | -1.1  | 0.033 | 4430  | 5020  | 2470  | 5140  | 4610  | 4340  | 2200  | 4780  | 1017  | 2032.2 | 2 | 0.0127 | 6.236 |
| Superoxide dismutase (Fragment)<br>OS=Capra hircus<br>GN=MnSOD PE=2<br>SV=1 | tr C6KGS6 C6KGS6_CAPHI,tr C8BKD6 C8BKD6_SHEEP                      | gELL<br>EAIk                          | 94% | 47.2 | 49.69663 | Ref | 0.35  | -0.57 | 0.18  | -0.37 | -0.03 | -0.89 | -0.23 | 3340  | 3300  | 1910  | 3570  | 2690  | 2990  | 1720  | 2700  | 494.3 | 1479.9 | 3 | 0.0045 | 3.054 |

|                                                                                   |                                                   |                                 |     |      |          |     |        |       |       |        |       |       |       |       |       |       |       |       |       |       |       |       |        |   |        |       |
|-----------------------------------------------------------------------------------|---------------------------------------------------|---------------------------------|-----|------|----------|-----|--------|-------|-------|--------|-------|-------|-------|-------|-------|-------|-------|-------|-------|-------|-------|-------|--------|---|--------|-------|
| Superoxide<br>dismutase<br>(Fragment)<br>OS=Capra hircus<br>GN=MnSOD PE=2<br>SV=1 | tr C6KGS6 C6KGS6_CAPHI,tr C8BKD6 C8BKD6_S<br>HEEP | gELL<br>EAIk                    | 94% | 47.3 | 49.3681  | Ref | 0.57   | -1.1  | 0.18  | -0.42  | -0.12 | -0.93 | -0.16 | 2540  | 2830  | 998   | 2640  | 1910  | 2060  | 1220  | 2070  | 494.3 | 1479.9 | 3 | 0.0023 | 1.576 |
| Superoxide<br>dismutase<br>(Fragment)<br>OS=Capra hircus<br>GN=MnSOD PE=2<br>SV=1 | tr C6KGS6 C6KGS6_CAPHI,tr C8BKD6 C8BKD6_S<br>HEEP | hHA<br>AYV<br>NNL<br>NVA<br>EEK | 92% | 48.3 | 54.48165 | Ref | 0.029  | -0.33 | 0.037 | -0.38  | 0.071 | -0.52 | 0.021 | 4680  | 4290  | 3620  | 5260  | 4340  | 5180  | 3590  | 5190  | 773.1 | 2316.2 | 3 | 0.0174 | 7.504 |
| Superoxide<br>dismutase<br>(Fragment)<br>OS=Capra hircus<br>GN=MnSOD PE=2<br>SV=1 | tr C6KGS6 C6KGS6_CAPHI,tr C8BKD6 C8BKD6_S<br>HEEP | hHA<br>AYVn<br>NLN<br>VAEE<br>k | 64% | 36.5 | 54.63757 | Ref | -0.13  | 0.01  | -0.18 | -0.21  | 0.024 | -0.59 | -0.06 | 3510  | 2720  | 3240  | 3180  | 3440  | 3530  | 2410  | 3460  | 773.4 | 2317.2 | 3 | 0.006  | 2.575 |
| Superoxide<br>dismutase<br>(Fragment)<br>OS=Capra hircus<br>GN=MnSOD PE=2<br>SV=1 | tr C6KGS6 C6KGS6_CAPHI,tr C8BKD6 C8BKD6_S<br>HEEP | hHA<br>AYVn<br>NLN<br>VAEE<br>k | 95% | 50.3 | 54.50546 | Ref | 0.063  | -0.36 | -0.05 | -0.023 | -0.09 | -0.45 | -0.05 | 30400 | 29900 | 24100 | 33700 | 37700 | 31500 | 25600 | 33500 | 580.3 | 2317.2 | 4 | 0.0167 | 7.21  |
| Superoxide<br>dismutase<br>(Fragment)<br>OS=Capra hircus<br>GN=MnSOD PE=2<br>SV=1 | tr C6KGS6 C6KGS6_CAPHI,tr C8BKD6 C8BKD6_S<br>HEEP | hHA<br>AYVn<br>NLN<br>VAEE<br>k | 95% | 75.2 | 54.51279 | Ref | -0.065 | -0.36 | -0.17 | -0.14  | -0.01 | -0.29 | 0.29  | 3850  | 4120  | 3650  | 4670  | 5250  | 5020  | 4310  | 6410  | 773.4 | 2317.2 | 3 | 0.0148 | 6.367 |

|                                                                                   |                                                                                                                                                                                                                                   |                  |     |      |          |     |        |       |       |        |       |       |       |       |       |       |       |       |       |       |       |       |        |   |        |       |
|-----------------------------------------------------------------------------------|-----------------------------------------------------------------------------------------------------------------------------------------------------------------------------------------------------------------------------------|------------------|-----|------|----------|-----|--------|-------|-------|--------|-------|-------|-------|-------|-------|-------|-------|-------|-------|-------|-------|-------|--------|---|--------|-------|
| Superoxide<br>dismutase<br>(Fragment)<br>OS=Capra hircus<br>GN=MnSOD PE=2<br>SV=1 | tr C6KGS6 C6KGS6_CAPHI, tr C8BKD6 C8BKD6_SHEEP                                                                                                                                                                                    | hHAAYVnNLNVAEEK  | 88% | 43.2 | 54.5798  | Ref | 0.16   | -0.22 | -0.1  | -0.2   | -0.16 | -0.1  | -0.12 | 18400 | 21900 | 18300 | 22300 | 23000 | 20600 | 22400 | 21900 | 580.3 | 2317.2 | 4 | 0.0101 | 4.363 |
| Ubiquilin-1<br>OS=Pongo abelii<br>GN=UBQLN1 PE=2<br>SV=1                          | 4 UBQL1_PONAB,sp Q9UMX0 UBQL1_HUMAN, tr B3KNI2 B3KNI2_HUMAN, tr B3KNI8 B3KNI8_HUMAN, tr C5ISB7 C5ISB7_SHEEP, tr D2H0N7 D2H0N7_AI LME, tr E2RPC0 E2RPCO_CANFA, tr F1N1A3 F1N1A3_BOVIN, tr F6VA D6 F6VA D6_ORNA N, tr F6VA E7 F6VAE | aLSNLESIPGGYNALR | 88% | 42.4 | 53.79146 | Ref | -0.061 | -0.36 | 0.037 | -0.094 | 0.19  | -0.26 | 0.079 | 3170  | 2990  | 2640  | 3900  | 3920  | 4170  | 3190  | 4000  | 990   | 1978.1 | 2 | 0.0067 | 3.378 |

|                                                          |                                                                                                                                                                                                                                                                 |                                  |     |      |          |     |       |       |       |       |      |       |       |      |      |      |      |      |      |      |      |       |        |   |        |       |
|----------------------------------------------------------|-----------------------------------------------------------------------------------------------------------------------------------------------------------------------------------------------------------------------------------------------------------------|----------------------------------|-----|------|----------|-----|-------|-------|-------|-------|------|-------|-------|------|------|------|------|------|------|------|------|-------|--------|---|--------|-------|
| Ubiquilin-1<br>OS=Pongo abelii<br>GN=UBQLN1 PE=2<br>SV=1 | 4 UBQL1_PONAB,s<br>p Q9UMX<br>0 UBQL1_HUMAN,<br>tr B3KNI2 B3KNI2_HUMAN,t<br>r B3KNI8 B3KNI8_HUMAN,t<br>r C5ISB7 C5ISB7_S<br>HEEP,tr D2H0N7 D2H0N7_AI<br>LME,tr E2RPC0 E2RPCO_CAN<br>FA,tr F1N1A3 F1N1A3_BOVI<br>N,tr F6VA D6 F6VA D6_ORNA<br>N,tr F6VA E7 F6VAE | aLSN<br>LESIP<br>GGy<br>NAL<br>R | 63% | 35.4 | 53.74754 | Ref | -0.26 | -0.35 | 0.2   | -0.17 | 0.16 | -0.53 | 0.073 | 3440 | 2270 | 2320 | 3820 | 3260 | 3570 | 2300 | 3480 | 761.8 | 2282.3 | 3 | 0.0151 | 6.628 |
| Ubiquilin-1<br>OS=Pongo abelii<br>GN=UBQLN1 PE=2<br>SV=1 | 4 UBQL1_PONAB,s<br>p Q9UMX<br>0 UBQL1_HUMAN,<br>tr B3KNI2 B3KNI2_HUMAN,t<br>r B3KNI8 B3KNI8_HUMAN,t<br>r C5ISB7 C5ISB7_S<br>HEEP,tr D2H0N7 D2H0N7_AI<br>LME,tr E2RPC0 E2RPCO_CAN<br>FA,tr F1N1A3 F1N1A3_BOVI<br>N,tr F6VA D6 F6VA D6_ORNA<br>N,tr F6VA E7 F6VAE | ILGS<br>QPS                      | 74% | 32.5 | 48.98917 | Ref | 0.068 | -0.54 | 0.056 | -0.2  | 0.21 | -0.21 | -0.07 | 1160 | 1050 | 750  | 1270 | 1180 | 1360 | 1070 | 1170 | 503.3 | 1004.6 | 2 | 0.0064 | 6.401 |

|                                                          |                                                                                                                                                                                                                                                                                                                              |                                 |     |      |          |     |       |       |       |       |       |       |       |       |       |       |       |       |       |       |       |       |      |   |        |       |
|----------------------------------------------------------|------------------------------------------------------------------------------------------------------------------------------------------------------------------------------------------------------------------------------------------------------------------------------------------------------------------------------|---------------------------------|-----|------|----------|-----|-------|-------|-------|-------|-------|-------|-------|-------|-------|-------|-------|-------|-------|-------|-------|-------|------|---|--------|-------|
| Ubiquilin-1<br>OS=Pongo abelii<br>GN=UBQLN1 PE=2<br>SV=1 | 4 UBQL1<br>_PONAB,s<br>p Q9UMX<br>0 UBQL1<br>_HUMAN,<br>tr B3KNI2<br> B3KNI2_<br>HUMAN,t<br>r B3KNI8<br> B3KNI8_<br>HUMAN,t<br>r C5ISB7 <br>C5ISB7_S<br>HEEP,tr D<br>2H0N7 D<br>2H0N7_AI<br>LME,tr E2<br>RPC0 E2R<br>PCO_CAN<br>FA,tr F1N<br>1A3 F1N1<br>A3_BOVI<br>N,tr F6VA<br>D6 F6VA<br>D6_ORNA<br>N,tr F6VA<br>E7 F6VAE | nPEI<br>SHM<br>LNN<br>PDI<br>MR | 95% | 64.5 | 53.07597 | Ref | 0.1   | -0.16 | -0.04 | -0.25 | -0.03 | -0.11 | -0.14 | 13600 | 12300 | 11200 | 13600 | 13000 | 13200 | 13000 | 12600 | 695.7 | 2084 | 3 | 0.015  | 7.197 |
| Ubiquilin-1<br>OS=Pongo abelii<br>GN=UBQLN1 PE=2<br>SV=1 | 4 UBQL1<br>_PONAB,s<br>p Q9UMX<br>0 UBQL1<br>_HUMAN,<br>tr B3KNI2<br> B3KNI2_<br>HUMAN,t<br>r B3KNI8<br> B3KNI8_<br>HUMAN,t<br>r C5ISB7 <br>C5ISB7_S<br>HEEP,tr D<br>2H0N7 D<br>2H0N7_AI<br>LME,tr E2<br>RPC0 E2R<br>PCO_CAN<br>FA,tr F1N<br>1A3 F1N1<br>A3_BOVI<br>N,tr F6VA<br>D6 F6VA<br>D6_ORNA<br>N,tr F6VA<br>E7 F6VAE | nPEI<br>SHM<br>LNN<br>PDI<br>MR | 88% | 43.9 | 53.132   | Ref | 0.075 | -0.17 | 0.055 | -0.11 | -0.24 | 0.085 | -0.16 | 4780  | 4790  | 4370  | 5750  | 5650  | 4520  | 5900  | 4940  | 695.7 | 2084 | 3 | 0.0119 | 5.701 |



|                                                          |                                                                                                                                                                                                                                                          |                           |     |      |          |     |       |       |       |       |      |       |       |      |      |      |      |      |      |      |      |       |        |   |        |       |
|----------------------------------------------------------|----------------------------------------------------------------------------------------------------------------------------------------------------------------------------------------------------------------------------------------------------------|---------------------------|-----|------|----------|-----|-------|-------|-------|-------|------|-------|-------|------|------|------|------|------|------|------|------|-------|--------|---|--------|-------|
| Ubiquilin-1<br>OS=Pongo abelii<br>GN=UBQLN1 PE=2<br>SV=1 | 4 UBQL1_PONAB,s<br>p Q9UMX0 UBQL1_HUMAN,<br>tr B3KNI2 B3KNI2_HUMAN,t<br>r B3KNI8 B3KNI8_HUMAN,t<br>r C5ISB7 C5ISB7_S<br>HEEP,tr D2H0N7 D2H0N7_AI<br>LME,tr E2RPC0 E2RPCO_CAN<br>FA,tr F1N1A3 F1N1A3_BOVI<br>N,tr F6VAD6 F6VAD6_ORNA<br>N,tr F6VAE7 F6VAE | sHTD<br>QLVL<br>IFAG<br>k | 69% | 35.3 | 52.33633 | Ref | 0.033 | -0.51 | -0.03 | -0.23 | 0.31 | -0.88 | 0.36  | 3350 | 2970 | 2210 | 3470 | 3320 | 4210 | 1930 | 4530 | 679.7 | 2036.2 | 3 | 0.0128 | 6.259 |
| Ubiquilin-1<br>OS=Pongo abelii<br>GN=UBQLN1 PE=2<br>SV=1 | 4 UBQL1_PONAB,s<br>p Q9UMX0 UBQL1_HUMAN,<br>tr B3KNI2 B3KNI2_HUMAN,t<br>r B3KNI8 B3KNI8_HUMAN,t<br>r C5ISB7 C5ISB7_S<br>HEEP,tr D2H0N7 D2H0N7_AI<br>LME,tr E2RPC0 E2RPCO_CAN<br>FA,tr F1N1A3 F1N1A3_BOVI<br>N,tr F6VAD6 F6VAD6_ORNA<br>N,tr F6VAE7 F6VAE | sHTD<br>QLVL<br>IFAG<br>k | 66% | 34.5 | 52.21247 | Ref | 0.1   | -0.35 | 0.11  | -0.25 | 0.19 | -0.37 | 0.038 | 2760 | 2860 | 2270 | 3500 | 3010 | 3550 | 2520 | 3320 | 679.7 | 2036.2 | 3 | 0.0107 | 5.272 |

|                                                          |                                                                                                                                                                                                                                                          |                           |     |      |          |     |        |       |       |       |       |       |       |      |      |      |      |      |      |      |      |       |        |   |        |       |
|----------------------------------------------------------|----------------------------------------------------------------------------------------------------------------------------------------------------------------------------------------------------------------------------------------------------------|---------------------------|-----|------|----------|-----|--------|-------|-------|-------|-------|-------|-------|------|------|------|------|------|------|------|------|-------|--------|---|--------|-------|
| Ubiquilin-1<br>OS=Pongo abelii<br>GN=UBQLN1 PE=2<br>SV=1 | 4 UBQL1_PONAB,s<br>p Q9UMX0 UBQL1_HUMAN,<br>tr B3KNI2 B3KNI2_HUMAN,t<br>r B3KNI8 B3KNI8_HUMAN,t<br>r C5ISB7 C5ISB7_S<br>HEEP,tr D2H0N7 D2H0N7_AI<br>LME,tr E2RPC0 E2RPCO_CAN<br>FA,tr F1N1A3 F1N1A3_BOVI<br>N,tr F6VAD6 F6VAD6_ORNA<br>N,tr F6VAE7 F6VAE | sHTD<br>QLVL<br>IFAG<br>k | 73% | 36.1 | 52.20605 | Ref | -0.13  | 0.003 | -0.09 | -0.17 | 0.14  | -0.43 | -0.06 | 2500 | 1860 | 2210 | 2330 | 2420 | 2630 | 1840 | 2360 | 679.7 | 2036.2 | 3 | 0.0095 | 4.639 |
| Ubiquilin-1<br>OS=Pongo abelii<br>GN=UBQLN1 PE=2<br>SV=1 | 4 UBQL1_PONAB,s<br>p Q9UMX0 UBQL1_HUMAN,<br>tr B3KNI2 B3KNI2_HUMAN,t<br>r B3KNI8 B3KNI8_HUMAN,t<br>r C5ISB7 C5ISB7_S<br>HEEP,tr D2H0N7 D2H0N7_AI<br>LME,tr E2RPC0 E2RPCO_CAN<br>FA,tr F1N1A3 F1N1A3_BOVI<br>N,tr F6VAD6 F6VAD6_ORNA<br>N,tr F6VAE7 F6VAE | sHTD<br>QLVL<br>IFAG<br>k | 60% | 31.5 | 52.22472 | Ref | -0.033 | -0.34 | -0.27 | -0.2  | 0.055 | -0.48 | 0.52  | 2100 | 1840 | 1610 | 1900 | 2200 | 2300 | 1660 | 3280 | 510.1 | 2036.2 | 4 | 0.009  | 4.441 |

|                                                                                                       |                       |                                          |     |      |          |     |        |       |       |       |       |       |       |      |      |      |      |      |      |      |      |       |        |   |        |       |
|-------------------------------------------------------------------------------------------------------|-----------------------|------------------------------------------|-----|------|----------|-----|--------|-------|-------|-------|-------|-------|-------|------|------|------|------|------|------|------|------|-------|--------|---|--------|-------|
| Complement component 1 Q subcomponent-binding protein, mitochondrial OS=Bos taurus GN=C1QBP PE=2 SV=1 | sp Q3T0B6 C1QBP_BOVIN | aEEQ<br>EPEL<br>TSTP<br>NFV<br>VEVT<br>k | 95% | 67.8 | 55.45787 | Ref | 0.1    | 0.093 | -0.08 | -0.18 | 0.18  | -0.17 | -0.14 | 2280 | 2360 | 2550 | 2540 | 2620 | 2920 | 2390 | 2420 | 952.5 | 2854.5 | 3 | 0.0333 | 11.67 |
| Complement component 1 Q subcomponent-binding protein, mitochondrial OS=Bos taurus GN=C1QBP PE=2 SV=1 | sp Q3T0B6 C1QBP_BOVIN | aEEQ<br>EPEL<br>TSTP<br>NFV<br>VEVT<br>k | 89% | 44.7 | 55.46757 | Ref | -0.078 | -0.05 | -0.12 | -0.38 | 0.06  | 0.14  | 0.27  | 4920 | 4770 | 5280 | 5630 | 5200 | 6150 | 6800 | 7350 | 714.6 | 2854.5 | 4 | 0.0302 | 10.56 |
| Complement component 1 Q subcomponent-binding protein, mitochondrial OS=Bos taurus GN=C1QBP PE=2 SV=1 | sp Q3T0B6 C1QBP_BOVIN | aEEQ<br>EPEL<br>TSTP<br>NFV<br>VEVT<br>k | 95% | 58.7 | 55.47394 | Ref | 0.4    | -0.32 | 0.25  | -0.13 | 0.004 | -0.75 | 0.18  | 2890 | 3910 | 2570 | 4300 | 3620 | 3480 | 2160 | 4060 | 952.5 | 2854.5 | 3 | 0.0223 | 7.821 |

|                                                                                                       |                       |                                          |     |      |          |     |        |       |       |       |       |       |       |      |      |      |      |      |      |      |      |       |        |   |        |       |
|-------------------------------------------------------------------------------------------------------|-----------------------|------------------------------------------|-----|------|----------|-----|--------|-------|-------|-------|-------|-------|-------|------|------|------|------|------|------|------|------|-------|--------|---|--------|-------|
| Complement component 1 Q subcomponent-binding protein, mitochondrial OS=Bos taurus GN=C1QBP PE=2 SV=1 | sp Q3T0B6 C1QBP_BOVIN | aEEQ<br>EPEL<br>TSTP<br>NFV<br>VEVT<br>k | 95% | 74.2 | 55.46278 | Ref | 0.056  | -0.02 | 0.033 | 0.034 | -0.15 | -0.1  | -0.16 | 991  | 895  | 924  | 1070 | 1180 | 912  | 981  | 937  | 952.5 | 2854.5 | 3 | 0.0176 | 6.151 |
| Complement component 1 Q subcomponent-binding protein, mitochondrial OS=Bos taurus GN=C1QBP PE=2 SV=1 | sp Q3T0B6 C1QBP_BOVIN | mSG<br>GWE<br>LEVn<br>GTE<br>Ak          | 93% | 49.9 | 53.60626 | Ref | -0.026 | -0.02 | 0.11  | -0.32 | 0.15  | -0.38 | 0.075 | 7240 | 6050 | 6590 | 8090 | 6620 | 8000 | 5790 | 7880 | 739.7 | 2216.1 | 3 | 0.0206 | 9.27  |
| Complement component 1 Q subcomponent-binding protein, mitochondrial OS=Bos taurus GN=C1QBP PE=2 SV=1 | sp Q3T0B6 C1QBP_BOVIN | mSG<br>GWE<br>LEVn<br>GTE<br>Ak          | 85% | 42.3 | 53.63432 | Ref | -0.04  | -0.04 | 0.075 | -0.02 | 0.16  | -0.29 | -0.02 | 5970 | 5640 | 6140 | 7440 | 7670 | 7590 | 5790 | 6940 | 739.7 | 2216.1 | 3 | 0.0187 | 8.444 |

|                                                                                                       |                       |                     |     |      |          |     |        |       |       |        |       |       |       |       |       |       |       |       |       |       |       |      |        |   |        |       |
|-------------------------------------------------------------------------------------------------------|-----------------------|---------------------|-----|------|----------|-----|--------|-------|-------|--------|-------|-------|-------|-------|-------|-------|-------|-------|-------|-------|-------|------|--------|---|--------|-------|
| Complement component 1 Q subcomponent-binding protein, mitochondrial OS=Bos taurus GN=C1QBP PE=2 SV=1 | sp Q3T0B6 C1QBP_BOVIN | mSG GWE LEVn GTE Ak | 95% | 70   | 53.64902 | Ref | -0.36  | -0.08 | 0.062 | -0.22  | 0.23  | -0.36 | 0.085 | 1240  | 732   | 965   | 1190  | 1080  | 1290  | 892   | 1210  | 1109 | 2216.1 | 2 | 0.0176 | 7.918 |
| Complement component 1 Q subcomponent-binding protein, mitochondrial OS=Bos taurus GN=C1QBP PE=2 SV=1 | sp Q3T0B6 C1QBP_BOVIN | mSG GWE LEVn GTE Ak | 68% | 36   | 53.30728 | Ref | 0.12   | -0.02 | 0.04  | -0.26  | -0.02 | -0.16 | -0.02 | 6860  | 6490  | 6360  | 7460  | 6680  | 6900  | 6550  | 7120  | 745  | 2232.1 | 3 | 0.0166 | 7.436 |
| Complement component 1 Q subcomponent-binding protein, mitochondrial OS=Bos taurus GN=C1QBP PE=2 SV=1 | sp Q3T0B6 C1QBP_BOVIN | mSG GWE LEVn GTE Ak | 94% | 51.3 | 53.31257 | Ref | -0.084 | -0.22 | -0.04 | -0.033 | 0.17  | -0.23 | 0.093 | 15900 | 13000 | 12800 | 16300 | 18000 | 18200 | 14300 | 17800 | 745  | 2232.1 | 3 | 0.0164 | 7.342 |

|                                                                                       |                        |                                         |     |      |          |     |       |      |       |       |      |       |      |      |      |       |      |      |       |      |       |       |        |   |        |       |
|---------------------------------------------------------------------------------------|------------------------|-----------------------------------------|-----|------|----------|-----|-------|------|-------|-------|------|-------|------|------|------|-------|------|------|-------|------|-------|-------|--------|---|--------|-------|
| DNA binding protein (Fragment)<br>OS=Canis familiaris<br>GN=dpbA variant<br>PE=2 SV=1 | tr Q9XSU1 Q9XSU1_CANFA | gAEA<br>ANV<br>TGP<br>DGV<br>PVE<br>GSR | 95% | 67.3 | 53.17357 | Ref | -0.41 | 0.27 | 0.34  | 0.012 | 0.54 | -0.02 | 0.98 | 1030 | 657  | 1140  | 1350 | 1180 | 1490  | 1060 | 2080  | 1044  | 2086   | 2 | 0.0222 | 10.64 |
| DNA binding protein (Fragment)<br>OS=Canis familiaris<br>GN=dpbA variant<br>PE=2 SV=1 | tr Q9XSU1 Q9XSU1_CANFA | gAEA<br>ANV<br>TGP<br>DGV<br>PVE<br>GSR | 95% | 82.3 | 53.38512 | Ref | -0.32 | 0.52 | 0.13  | 0.015 | 0.81 | -0.18 | 0.8  | 7430 | 5370 | 10400 | 8940 | 9090 | 13800 | 7220 | 14200 | 1044  | 2086   | 2 | 0.0136 | 6.535 |
| DNA binding protein (Fragment)<br>OS=Canis familiaris<br>GN=dpbA variant<br>PE=2 SV=1 | tr Q9XSU1 Q9XSU1_CANFA | sVG<br>DGE<br>TVqF<br>DVV<br>EGEK       | 95% | 50.5 | 54.10469 | Ref | -0.72 | 0.26 | 0.3   | 0.24  | 0.88 | -0.42 | 0.95 | 2280 | 1280 | 2720  | 3150 | 3340 | 4520  | 1920 | 4910  | 1203  | 2403.2 | 2 | 0.0212 | 8.822 |
| DNA binding protein (Fragment)<br>OS=Canis familiaris<br>GN=dpbA variant<br>PE=2 SV=1 | tr Q9XSU1 Q9XSU1_CANFA | sVG<br>DGE<br>TVqF<br>DVV<br>EGEK       | 83% | 41.6 | 54.12408 | Ref | -0.27 | 0.36 | 0.068 | 0.24  | 0.99 | -0.11 | 0.52 | 5210 | 3800 | 6390  | 5840 | 7250 | 10600 | 5180 | 7980  | 802.1 | 2403.2 | 3 | 0.0204 | 8.475 |

|                                                                                       |                        |                                   |     |      |          |     |        |      |      |      |      |       |      |       |       |       |       |       |       |       |        |       |        |   |        |       |
|---------------------------------------------------------------------------------------|------------------------|-----------------------------------|-----|------|----------|-----|--------|------|------|------|------|-------|------|-------|-------|-------|-------|-------|-------|-------|--------|-------|--------|---|--------|-------|
| DNA binding protein (Fragment)<br>OS=Canis familiaris<br>GN=dpbA variant<br>PE=2 SV=1 | tr Q9XSU1 Q9XSU1_CANFA | sVG<br>DGE<br>TVqF<br>DVV<br>EGEK | 73% | 38.2 | 54.12506 | Ref | -0.27  | 0.33 | 0.36 | 0.31 | 0.7  | -0.48 | 0.99 | 44700 | 43300 | 71000 | 81600 | 86700 | 99200 | 45900 | 126000 | 802.1 | 2403.2 | 3 | 0.0197 | 8.176 |
| DNA binding protein (Fragment)<br>OS=Canis familiaris<br>GN=dpbA variant<br>PE=2 SV=1 | tr Q9XSU1 Q9XSU1_CANFA | sVG<br>DGE<br>TVqF<br>DVV<br>EGEK | 91% | 47.4 | 54.0917  | Ref | -0.064 | 0.42 | 0.34 | 0.39 | 0.45 | 0.29  | 0.27 | 2890  | 2380  | 3620  | 3830  | 4370  | 3990  | 3710  | 3640   | 802.1 | 2403.2 | 3 | 0.0226 | 9.386 |
| DNA binding protein (Fragment)<br>OS=Canis familiaris<br>GN=dpbA variant<br>PE=2 SV=1 | tr Q9XSU1 Q9XSU1_CANFA | sVG<br>DGE<br>TVqF<br>DVV<br>EGEK | 81% | 40.8 | 54.19119 | Ref | 0.17   | 0.24 | -0   | 0.15 | 0.47 | 0.21  | 0.76 | 743   | 716   | 812   | 772   | 949   | 1030  | 902   | 1310   | 802.1 | 2403.2 | 3 | 0.0162 | 6.728 |
| DNA binding protein (Fragment)<br>OS=Canis familiaris<br>GN=dpbA variant<br>PE=2 SV=1 | tr Q9XSU1 Q9XSU1_CANFA | sVG<br>DGE<br>TVqF<br>DVV<br>EGEK | 76% | 39.1 | 54.30971 | Ref | -0.32  | 0.25 | 0.31 | 0.2  | 0.46 | 0.21  | 0.75 | 406   | 262   | 421   | 494   | 504   | 529   | 462   | 670    | 802.1 | 2403.2 | 3 | 0.0109 | 4.52  |

|                                                                                       |                        |                                   |     |      |          |     |                       |                                |                               |                              |                              |                        |                               |                       |                       |                                |                               |                              |                              |                        |                               |       |        |   |        |       |
|---------------------------------------------------------------------------------------|------------------------|-----------------------------------|-----|------|----------|-----|-----------------------|--------------------------------|-------------------------------|------------------------------|------------------------------|------------------------|-------------------------------|-----------------------|-----------------------|--------------------------------|-------------------------------|------------------------------|------------------------------|------------------------|-------------------------------|-------|--------|---|--------|-------|
| DNA binding protein (Fragment)<br>OS=Canis familiaris<br>GN=dpbA variant<br>PE=2 SV=1 | tr Q9XSU1 Q9XSU1_CANFA | sVG<br>DGE<br>TVqF<br>DVV<br>EGEK | 95% | 55.7 | 54.07326 | Ref | No Values (-2.731676) | Reference Missing (0.52795684) | Reference Missing (1.0146731) | Reference Missing (0.905271) | Reference Missing (1.232552) | No Values (-3.0233378) | Reference Missing (0.6668909) | No Values (-2.934066) | No Values (-2.731676) | Reference Missing (0.52795684) | Reference Missing (1.0146731) | Reference Missing (0.905271) | Reference Missing (1.232552) | No Values (-3.0233378) | Reference Missing (0.6668909) | 802.1 | 2403.2 | 3 | 0.0227 | 9.461 |
| UMP-CMP kinase<br>OS=Bos taurus<br>GN=CMPK1 PE=2<br>SV=2                              | sp Q2KIW9 KCY_BOVIN    | iVPV<br>EITIS<br>LLR              | 94% | 41.3 | 48.02445 | Ref | 0.16                  | 0.1                            | -0.05                         | 0.075                        | 0.012                        | 0.085                  | -0.21                         | 913                   | 889                   | 929                            | 940                           | 1130                         | 942                          | 1040                   | 837                           | 829   | 1656   | 2 | 0.0132 | 7.942 |
| UMP-CMP kinase<br>OS=Bos taurus<br>GN=CMPK1 PE=2<br>SV=2                              | sp Q2KIW9 KCY_BOVIN    | iVPV<br>EITIS<br>LLR              | 86% | 35.7 | 47.792   | Ref | 0.21                  | 0.018                          | -0.07                         | 0.04                         | 0.15                         | 0.018                  | -0.1                          | 1720                  | 1860                  | 1770                           | 1860                          | 2220                         | 2100                         | 1990                   | 1820                          | 829   | 1656   | 2 | 0.0097 | 5.878 |
| UMP-CMP kinase<br>OS=Bos taurus<br>GN=CMPK1 PE=2<br>SV=2                              | sp Q2KIW9 KCY_BOVIN    | iVPV<br>EITIS<br>LLR              | 89% | 39.4 | 48.11414 | Ref | 0.32                  | -0.14                          | 0.014                         | -0.051                       | -0.08                        | -0.01                  | -0.04                         | 245                   | 241                   | 190                            | 238                           | 251                          | 215                          | 235                    | 229                           | 553   | 1656   | 3 | 0.0058 | 3.528 |
| UMP-CMP kinase<br>OS=Bos taurus<br>GN=CMPK1 PE=2<br>SV=2                              | sp Q2KIW9 KCY_BOVIN    | iVPV<br>EITIS<br>LLR              | 95% | 52.7 | 48.21985 | Ref | 0.2                   | -0.17                          | 0.15                          | 0.14                         | -0.25                        | 0.16                   | 0.016                         | 409                   | 445                   | 372                            | 523                           | 572                          | 381                          | 528                    | 475                           | 553   | 1656   | 3 | 0.0075 | 4.524 |
| UMP-CMP kinase<br>OS=Bos taurus<br>GN=CMPK1 PE=2<br>SV=2                              | sp Q2KIW9 KCY_BOVIN    | iVPV<br>EITIS<br>LLR              | 82% | 35.3 | 48.18569 | Ref | 0.18                  | 0.042                          | -0.39                         | -0.13                        | 0.42                         | 0.011                  | -0.23                         | 176                   | 157                   | 155                            | 129                           | 171                          | 217                          | 171                    | 144                           | 553   | 1656   | 3 | 0.0068 | 4.089 |



|                                                          |                       |                                  |     |      |          |     |                                          |       |       |       |       |                                           |       |       |                                       |      |       |       |                                           |       |       |       |        |   |        |       |
|----------------------------------------------------------|-----------------------|----------------------------------|-----|------|----------|-----|------------------------------------------|-------|-------|-------|-------|-------------------------------------------|-------|-------|---------------------------------------|------|-------|-------|-------------------------------------------|-------|-------|-------|--------|---|--------|-------|
| UMP-CMP kinase<br>OS=Bos taurus<br>GN=CMPK1 PE=2<br>SV=2 | sp Q2KIW9 KCY_BOVIN   | IVPV<br>EITIS<br>LLR             | 94% | 46   | 48.21985 | Ref | Value<br>Missing<br>(-<br>1.5247<br>099) | 0.61  | 0.73  | -0.13 | 0.008 | Value<br>Missi<br>ng (-<br>1.816<br>3713) | 0.18  | 129   | Value<br>Missing (-<br>1.524709<br>9) | 144  | 177   | 107   | Value<br>Missin<br>g (-<br>1.8163<br>713) | 103   | 121   | 553   | 1656   | 3 | 0.0075 | 4.524 |
| UMP-CMP kinase<br>OS=Bos taurus<br>GN=CMPK1 PE=2<br>SV=2 | sp Q2KIW9 KCY_BOVIN   | mkP<br>QVV<br>FVLG<br>GPG<br>AGk | 93% | 45.9 | 50.47645 | Ref | -0.024                                   | -0.01 | 0.088 | 0.15  | 0.11  | -0.04                                     | -0.3  | 1640  | 1240                                  | 1360 | 1630  | 1880  | 1590                                      | 1510  | 1250  | 833.2 | 2496.5 | 3 | 0.0214 | 8.574 |
| UMP-CMP kinase<br>OS=Bos taurus<br>GN=CMPK1 PE=2<br>SV=2 | sp Q2KIW9 KCY_BOVIN   | mkP<br>QVV<br>FVLG<br>GPG<br>AGk | 89% | 39.1 | 50.1468  | Ref | 0.11                                     | 0.044 | -0    | 0.1   | 0.19  | -0.11                                     | -0.19 | 7280  | 6850                                  | 7070 | 7700  | 9130  | 8480                                      | 7200  | 6760  | 625.1 | 2496.5 | 4 | 0.0155 | 6.202 |
| UMP-CMP kinase<br>OS=Bos taurus<br>GN=CMPK1 PE=2<br>SV=2 | sp Q2KIW9 KCY_BOVIN   | mkP<br>QVV<br>FVLG<br>GPG<br>AGk | 90% | 39.9 | 49.84041 | Ref | 0.02                                     | 0.052 | 5E-04 | 0.091 | 0.063 | 0.099                                     | -0.12 | 8780  | 7860                                  | 8720 | 9440  | 11100 | 9490                                      | 10200 | 8680  | 625.1 | 2496.5 | 4 | 0.0101 | 4.056 |
| Profilin-1 OS=Bos<br>taurus GN=PFN1<br>PE=1 SV=2         | sp P02584 PROF1_BOVIN | cYE<br>MAS<br>HLR                | 86% | 36.5 | 47.33518 | Ref | 0.64                                     | -0.19 | 0.13  | -0.15 | -0.08 | 0.042                                     | 0.013 | 8310  | 11500                                 | 6960 | 9770  | 8870  | 8120                                      | 9250  | 8990  | 487.2 | 1458.7 | 3 | 0.0113 | 7.73  |
| Profilin-1 OS=Bos<br>taurus GN=PFN1<br>PE=1 SV=2         | sp P02584 PROF1_BOVIN | cYE<br>MAS<br>HLR                | 95% | 53.8 | 47.6505  | Ref | 0.34                                     | -0.26 | -0.04 | 0.07  | -0.06 | 0.23                                      | 0.013 | 11200 | 10900                                 | 7810 | 10200 | 12200 | 9680                                      | 12400 | 10600 | 487.2 | 1458.7 | 3 | 0.0067 | 4.585 |
| Profilin-1 OS=Bos<br>taurus GN=PFN1<br>PE=1 SV=2         | sp P02584 PROF1_BOVIN | dSLL<br>QDG<br>EFT<br>MDL<br>R   | 84% | 38.8 | 52.05889 | Ref | 0.56                                     | -0.26 | 0.068 | 0.07  | 0.087 | 0.061                                     | 0.084 | 2690  | 4220                                  | 2600 | 3650  | 4030  | 3560                                      | 3650  | 3680  | 972.5 | 1943   | 2 | 0.01   | 5.14  |

|                                                |                                                |                               |     |      |          |     |        |       |       |        |       |       |       |       |      |       |       |       |       |       |       |       |        |   |        |       |
|------------------------------------------------|------------------------------------------------|-------------------------------|-----|------|----------|-----|--------|-------|-------|--------|-------|-------|-------|-------|------|-------|-------|-------|-------|-------|-------|-------|--------|---|--------|-------|
| Profilin-1 OS=Bos taurus GN=PFN1 PE=1 SV=2     | sp P02584 PROF1_BOVIN                          | sSFF VnGL TLG GQk             | 94% | 50.2 | 53.72363 | Ref | 0.4    | -0.34 | 0.12  | 0.11   | 0.037 | 0.18  | -0.08 | 8600  | 9700 | 6290  | 9720  | 10700 | 8840  | 10200 | 8460  | 688.7 | 2063.1 | 3 | 0.013  | 6.297 |
| Profilin-1 OS=Bos taurus GN=PFN1 PE=1 SV=2     | sp P02584 PROF1_BOVIN                          | sSFF VnGL TLG GQk             | 72% | 37.4 | 53.74847 | Ref | 0.27   | 0.019 | 0.06  | 0.006  | -0.03 | -0.07 | 0.22  | 2850  | 2890 | 2630  | 3040  | 3220  | 2750  | 2780  | 3380  | 688.7 | 2063.1 | 3 | 0.0167 | 8.07  |
| Profilin-1 OS=Bos taurus GN=PFN1 PE=1 SV=2     | sp P02584 PROF1_BOVIN                          | sTGG APTF NITV TMT Ak         | 94% | 52.6 | 54.37925 | Ref | 0.22   | -0.2  | 0.21  | 0.081  | 0.22  | 0.058 | 0.03  | 1430  | 1570 | 1270  | 1890  | 1910  | 1830  | 1710  | 1670  | 769.1 | 2304.3 | 3 | 0.0086 | 3.729 |
| Profilin-1 OS=Bos taurus GN=PFN1 PE=1 SV=2     | sp P02584 PROF1_BOVIN                          | tFVN ITPA EVGI LVGk           | 95% | 60.4 | 50.63896 | Ref | 0.46   | -0.22 | 0.25  | -0.023 | -0.06 | -0.07 | 0.14  | 1250  | 1530 | 1030  | 1620  | 1470  | 1250  | 1290  | 1490  | 756.1 | 2265.3 | 3 | 0.0124 | 5.457 |
| Profilin-1 OS=Bos taurus GN=PFN1 PE=1 SV=2     | sp P02584 PROF1_BOVIN                          | tLVLL MGk                     | 85% | 36.7 | 48.0058  | Ref | 0.6    | -0.73 | 0.52  | -0.042 | -0.14 | -0.03 | -0.09 | 6110  | 7620 | 3280  | 8760  | 6550  | 5330  | 6010  | 5720  | 495   | 1481.9 | 3 | 0.0093 | 6.268 |
| FBLN1 protein OS=Bos taurus GN=FBLN1 PE=2 SV=1 | tr A5D7S8 A5D7S8_BOVIN, tr F1MYN5 F1MYN5_BOVIN | aiTP AyPA NHA DIIF DITD GNL R | 87% | 43.3 | 55.32806 | Ref | -0.056 | 0.23  | -0.07 | 0.14   | 0.11  | 0.3   | 0.081 | 791   | 754  | 1000  | 907   | 1160  | 988   | 1180  | 1010  | 777.4 | 3105.7 | 4 | 0.0094 | 3.025 |
| FBLN1 protein OS=Bos taurus GN=FBLN1 PE=2 SV=1 | tr A5D7S8 A5D7S8_BOVIN, tr F1MYN5 F1MYN5_BOVIN | cLAF EcPE NYR                 | 61% | 25.8 | 44.48026 | Ref | 0.36   | 0.017 | -0.17 | -0.075 | -0.24 | 0.14  | 0.2   | 950   | 886  | 758   | 747   | 880   | 686   | 930   | 965   | 580.9 | 1739.7 | 3 | 0.0099 | 5.681 |
| FBLN1 protein OS=Bos taurus GN=FBLN1 PE=2 SV=1 | tr A5D7S8 A5D7S8_BOVIN, tr F1MYN5 F1MYN5_BOVIN | gQET ADF APG DGG DLQ ETAK     | 72% | 37.6 | 53.92461 | Ref | -0.64  | 0.31  | 0.065 | -0.032 | 0.19  | 0.15  | 0.44  | 14200 | 8580 | 18000 | 17000 | 17600 | 17900 | 18200 | 22000 | 872.4 | 2614.3 | 3 | 0.0198 | 7.577 |

|                                                         |                                                |                                |     |      |          |     |       |       |       |        |       |       |       |       |       |       |       |        |       |       |       |       |        |   |        |       |
|---------------------------------------------------------|------------------------------------------------|--------------------------------|-----|------|----------|-----|-------|-------|-------|--------|-------|-------|-------|-------|-------|-------|-------|--------|-------|-------|-------|-------|--------|---|--------|-------|
| FBLN1 protein<br>OS=Bos taurus<br>GN=FBLN1 PE=2<br>SV=1 | tr A5D7S8 A5D7S8_BOVIN, tr F1MYN5 F1MYN5_BOVIN | gYHL<br>NEE<br>GTR             | 53% | 29.8 | 50.27121 | Ref | -0.23 | 0.25  | -0.08 | 0.11   | 0.21  | 0.16  | 0.2   | 5060  | 4000  | 6040  | 5420  | 6820   | 6340  | 6420  | 6550  | 740.4 | 1478.7 | 2 | 0.0127 | 8.562 |
| FBLN1 protein<br>OS=Bos taurus<br>GN=FBLN1 PE=2<br>SV=1 | tr A5D7S8 A5D7S8_BOVIN, tr F1MYN5 F1MYN5_BOVIN | IEM<br>NVV<br>VGG<br>VVS<br>HR | 87% | 43.7 | 53.67447 | Ref | 0.26  | 0.012 | 0.06  | -0.015 | 0.11  | 0.047 | 0.099 | 2210  | 2260  | 2070  | 2400  | 2510   | 2380  | 2390  | 2460  | 622   | 1863   | 3 | 0.0025 | 1.332 |
| FBLN1 protein<br>OS=Bos taurus<br>GN=FBLN1 PE=2<br>SV=1 | tr A5D7S8 A5D7S8_BOVIN, tr F1MYN5 F1MYN5_BOVIN | qVRP<br>IVGP<br>FHA<br>VLk     | 67% | 33   | 50.51017 | Ref | 0.37  | 0.37  | -0.09 | 0.004  | 0.042 | -0.1  | -0.07 | 2450  | 2800  | 3030  | 2480  | 2920   | 2610  | 2480  | 2510  | 616.7 | 1847.1 | 3 | 0.0084 | 4.549 |
| FBLN1 protein<br>OS=Bos taurus<br>GN=FBLN1 PE=2<br>SV=1 | tr A5D7S8 A5D7S8_BOVIN, tr F1MYN5 F1MYN5_BOVIN | tcVD<br>INeC<br>R              | 85% | 30.9 | 43.85106 | Ref | -0.25 | 0.2   | 0.032 | 0.18   | 0.026 | 0.27  | 0.068 | 81900 | 59100 | 87300 | 87300 | 106000 | 83600 | 1E+05 | 89300 | 724.8 | 1447.6 | 2 | 0.0091 | 6.309 |
| FBLN1 protein<br>OS=Bos taurus<br>GN=FBLN1 PE=2<br>SV=1 | tr A5D7S8 A5D7S8_BOVIN, tr F1MYN5 F1MYN5_BOVIN | vSEIE<br>EEQE<br>DPYL<br>NDR   | 85% | 38.1 | 50.95375 | Ref | -0.39 | 0.28  | -0.2  | 0.1    | 0.19  | 0.23  | 0.18  | 1640  | 1020  | 1760  | 1420  | 1930   | 1790  | 1920  | 1840  | 1135  | 2268.1 | 2 | 0.0178 | 7.841 |

|                                                                |                                                                                                                                                                                                                                                                                                                            |                                                      |     |      |          |     |       |       |       |       |       |       |       |       |       |       |       |       |       |      |       |       |        |   |        |       |
|----------------------------------------------------------------|----------------------------------------------------------------------------------------------------------------------------------------------------------------------------------------------------------------------------------------------------------------------------------------------------------------------------|------------------------------------------------------|-----|------|----------|-----|-------|-------|-------|-------|-------|-------|-------|-------|-------|-------|-------|-------|-------|------|-------|-------|--------|---|--------|-------|
| RNA-binding protein FUS<br>OS=Homo sapiens<br>GN=FUS PE=1 SV=1 | 7 FUS_H<br>UMAN,sp<br> P56959 <br>FUS_MOU<br>SE,sp Q2<br>8009 FUS<br>_BOVIN,tr<br> A8K4H1 <br>A8K4H1_<br>HUMAN,t<br>r B4DR70<br> B4DR70_<br>HUMAN,t<br>r E7EUX0<br> E7EUX0_<br>HUMAN,t<br>r F1N198<br> F1N198_<br>BOVIN,tr <br>F1PBJ4 F<br>1PBJ4_CA<br>NFA,tr F6<br>T5U5 F6T<br>5U5_MAC<br>MU,tr F7<br>D056 F7D<br>056_MAC | aPkp<br>DGP<br>GGG<br>PGG<br>SHM<br>GGN<br>YGD<br>DR | 95% | 53.2 | 52.74825 | Ref | -0.08 | 0.046 | -0.26 | -0.37 | 0.079 | -0.47 | -0.11 | 10800 | 10300 | 12200 | 11100 | 11300 | 13500 | 9620 | 12200 | 573.1 | 2860.3 | 5 | 0.0333 | 11.63 |
| RNA-binding protein FUS<br>OS=Homo sapiens<br>GN=FUS PE=1 SV=1 | 7 FUS_H<br>UMAN,sp<br> P56959 <br>FUS_MOU<br>SE,sp Q2<br>8009 FUS<br>_BOVIN,tr<br> A8K4H1 <br>A8K4H1_<br>HUMAN,t<br>r B4DR70<br> B4DR70_<br>HUMAN,t<br>r E7EUX0<br> E7EUX0_<br>HUMAN,t<br>r F1N198<br> F1N198_<br>BOVIN,tr <br>F1PBJ4 F<br>1PBJ4_CA<br>NFA,tr F6<br>T5U5 F6T<br>5U5_MAC<br>MU,tr F7<br>D056 F7D<br>056_MAC | aPkp<br>DGP<br>GGG<br>PGG<br>SHM<br>GGN<br>YGD<br>DR | 95% | 58.7 | 53.04807 | Ref | -0.52 | -0.29 | -0.1  | -0.27 | 0.27  | -0.62 | 0.089 | 12500 | 7910  | 10000 | 12800 | 12700 | 16000 | 9020 | 14600 | 716.1 | 2860.4 | 4 | 0.0248 | 8.661 |

|                                                                |                                                                                                                                                                                                                                                                                                                            |                                                      |     |      |          |     |       |       |       |       |      |       |       |       |       |       |       |       |       |       |       |       |        |   |        |       |
|----------------------------------------------------------------|----------------------------------------------------------------------------------------------------------------------------------------------------------------------------------------------------------------------------------------------------------------------------------------------------------------------------|------------------------------------------------------|-----|------|----------|-----|-------|-------|-------|-------|------|-------|-------|-------|-------|-------|-------|-------|-------|-------|-------|-------|--------|---|--------|-------|
| RNA-binding protein FUS<br>OS=Homo sapiens<br>GN=FUS PE=1 SV=1 | 7 FUS_H<br>UMAN,sp<br> P56959 <br>FUS_MOU<br>SE,sp Q2<br>8009 FUS<br>_BOVIN,tr<br> A8K4H1 <br>A8K4H1_<br>HUMAN,t<br>r B4DR70<br> B4DR70_<br>HUMAN,t<br>r E7EUX0<br> E7EUX0_<br>HUMAN,t<br>r F1N198<br> F1N198_<br>BOVIN,tr <br>F1PBJ4 F<br>1PBJ4_CA<br>NFA,tr F6<br>T5U5 F6T<br>5U5_MAC<br>MU,tr F7<br>D056 F7D<br>056_MAC | aPkP<br>DGP<br>GGG<br>PGG<br>SHM<br>GGN<br>yGD<br>DR | 77% | 34.8 | 55.14443 | Ref | -0.45 | -0.37 | -0.09 | -0.12 | 0.18 | -0.69 | 0.015 | 13800 | 8600  | 9850  | 13400 | 14500 | 15600 | 8860  | 14400 | 633.9 | 3164.6 | 5 | 0.0183 | 5.784 |
| RNA-binding protein FUS<br>OS=Homo sapiens<br>GN=FUS PE=1 SV=1 | 7 FUS_H<br>UMAN,sp<br> P56959 <br>FUS_MOU<br>SE,sp Q2<br>8009 FUS<br>_BOVIN,tr<br> A8K4H1 <br>A8K4H1_<br>HUMAN,t<br>r B4DR70<br> B4DR70_<br>HUMAN,t<br>r E7EUX0<br> E7EUX0_<br>HUMAN,t<br>r F1N198<br> F1N198_<br>BOVIN,tr <br>F1PBJ4 F<br>1PBJ4_CA<br>NFA,tr F6<br>T5U5 F6T<br>5U5_MAC<br>MU,tr F7<br>D056 F7D<br>056_MAC | eFSG<br>NPIK                                         | 62% | 33.2 | 52.07734 | Ref | -0.31 | -0.45 | -0.14 | -0.32 | 0.34 | -0.75 | -0.04 | 98200 | 64200 | 63300 | 87900 | 85500 | 1E+05 | 58100 | 94100 | 750.4 | 1498.8 | 2 | 0.0169 | 11.29 |

|                                                                |                                                                                                                                                                                                                                                                                                                            |                            |     |      |          |     |       |       |       |       |      |       |       |       |       |       |       |       |       |       |       |       |        |   |        |       |
|----------------------------------------------------------------|----------------------------------------------------------------------------------------------------------------------------------------------------------------------------------------------------------------------------------------------------------------------------------------------------------------------------|----------------------------|-----|------|----------|-----|-------|-------|-------|-------|------|-------|-------|-------|-------|-------|-------|-------|-------|-------|-------|-------|--------|---|--------|-------|
| RNA-binding protein FUS<br>OS=Homo sapiens<br>GN=FUS PE=1 SV=1 | 7 FUS_H<br>UMAN,sp<br> P56959 <br>FUS_MOU<br>SE,sp Q2<br>8009 FUS<br>_BOVIN,tr<br> A8K4H1 <br>A8K4H1_<br>HUMAN,t<br>r B4DR70<br> B4DR70_<br>HUMAN,t<br>r E7EUX0<br> E7EUX0_<br>HUMAN,t<br>r F1N198<br> F1N198_<br>BOVIN,tr <br>F1PBJ4 F<br>1PBJ4_CA<br>NFA,tr F6<br>T5U5 F6T<br>5U5_MAC<br>MU,tr F7<br>D056 F7D<br>056_MAC | eFSG<br>NPIK               | 76% | 36.2 | 51.99978 | Ref | -0.21 | -0.44 | -0.12 | -0.25 | 0.2  | -0.83 | -0.07 | 36100 | 24200 | 22400 | 31300 | 31400 | 37500 | 19100 | 32300 | 750.4 | 1498.9 | 2 | 0.0074 | 4.945 |
| RNA-binding protein FUS<br>OS=Homo sapiens<br>GN=FUS PE=1 SV=1 | 7 FUS_H<br>UMAN,sp<br> P56959 <br>FUS_MOU<br>SE,sp Q2<br>8009 FUS<br>_BOVIN,tr<br> A8K4H1 <br>A8K4H1_<br>HUMAN,t<br>r B4DR70<br> B4DR70_<br>HUMAN,t<br>r E7EUX0<br> E7EUX0_<br>HUMAN,t<br>r F1N198<br> F1N198_<br>BOVIN,tr <br>F1PBJ4 F<br>1PBJ4_CA<br>NFA,tr F6<br>T5U5 F6T<br>5U5_MAC<br>MU,tr F7<br>D056 F7D<br>056_MAC | eEAT<br>VSFD<br>DPPS<br>Ak | 95% | 55.5 | 53.83309 | Ref | -0.27 | -0.12 | -0.17 | -0.23 | 0.19 | -1.1  | 0.1   | 7480  | 5400  | 6500  | 7060  | 7460  | 8700  | 3690  | 8500  | 1015  | 2028   | 2 | 0.0133 | 6.548 |

|                                                                |                                                                                                                                                                                                                                                                                                                            |                          |     |      |          |     |       |       |       |       |      |       |       |       |      |       |       |       |       |      |       |       |        |   |        |       |
|----------------------------------------------------------------|----------------------------------------------------------------------------------------------------------------------------------------------------------------------------------------------------------------------------------------------------------------------------------------------------------------------------|--------------------------|-----|------|----------|-----|-------|-------|-------|-------|------|-------|-------|-------|------|-------|-------|-------|-------|------|-------|-------|--------|---|--------|-------|
| RNA-binding protein FUS<br>OS=Homo sapiens<br>GN=FUS PE=1 SV=1 | 7 FUS_H<br>UMAN,sp<br> P56959 <br>FUS_MOU<br>SE,sp Q2<br>8009 FUS<br>_BOVIN,tr<br> A8K4H1 <br>A8K4H1_<br>HUMAN,t<br>r B4DR70<br> B4DR70_<br>HUMAN,t<br>r E7EUX0<br> E7EUX0_<br>HUMAN,t<br>r F1N198<br> F1N198_<br>BOVIN,tr <br>F1PBJ4 F<br>1PBJ4_CA<br>NFA,tr F6<br>T5U5 F6T<br>5U5_MAC<br>MU,tr F7<br>D056 F7D<br>056_MAC | qIGII<br>k               | 55% | 22.8 | 42.6321  | Ref | -0.24 | -0.31 | -0.15 | -0.23 | 0.26 | -0.65 | 0.019 | 10800 | 8810 | 9100  | 11500 | 12000 | 14600 | 8110 | 12800 | 427.3 | 1278.8 | 3 | 0.0046 | 3.604 |
| RNA-binding protein FUS<br>OS=Homo sapiens<br>GN=FUS PE=1 SV=1 | 7 FUS_H<br>UMAN,sp<br> P56959 <br>FUS_MOU<br>SE,sp Q2<br>8009 FUS<br>_BOVIN,tr<br> A8K4H1 <br>A8K4H1_<br>HUMAN,t<br>r B4DR70<br> B4DR70_<br>HUMAN,t<br>r E7EUX0<br> E7EUX0_<br>HUMAN,t<br>r F1N198<br> F1N198_<br>BOVIN,tr <br>F1PBJ4 F<br>1PBJ4_CA<br>NFA,tr F6<br>T5U5 F6T<br>5U5_MAC<br>MU,tr F7<br>D056 F7D<br>056_MAC | tGQP<br>MIN<br>LYTD<br>R | 89% | 41.8 | 52.67313 | Ref | -0.46 | -0.32 | -0.2  | -0.39 | 0.34 | -0.56 | 0.051 | 13500 | 8500 | 10200 | 12500 | 12000 | 17400 | 9730 | 14800 | 856.9 | 1711.9 | 2 | 0.0111 | 6.475 |

|                                                           |                                                                                              |                   |     |      |          |     |                            |                                |                             |                                |                                |                                |                               |                        |                            |                                |                             |                                |                                |                                |                                |       |        |   |        |       |
|-----------------------------------------------------------|----------------------------------------------------------------------------------------------|-------------------|-----|------|----------|-----|----------------------------|--------------------------------|-----------------------------|--------------------------------|--------------------------------|--------------------------------|-------------------------------|------------------------|----------------------------|--------------------------------|-----------------------------|--------------------------------|--------------------------------|--------------------------------|--------------------------------|-------|--------|---|--------|-------|
| Histone H2A.x<br>OS=Homo sapiens<br>GN=H2AFX PE=1<br>SV=2 | sp P16104 H2AX_HUMAN, tr E2RNBO E2RNBO_CANFA, tr F7FGT7 F7FGT7_MACMU, tr Q17QG8 Q17QG8_BOVIN | aGL<br>QFP<br>VGR | 94% | 48.1 | 51.62299 | Ref | -0.38                      | 0.32                           | -0.64                       | -0.16                          | -0.07                          | -0.05                          | 0.64                          | 3470                   | 2260                       | 3970                           | 2290                        | 3520                           | 3270                           | 3470                           | 5570                           | 416.9 | 1247.7 | 3 | 0.0111 | 8.889 |
| Histone H2A.x<br>OS=Homo sapiens<br>GN=H2AFX PE=1<br>SV=2 | sp P16104 H2AX_HUMAN, tr E2RNBO E2RNBO_CANFA, tr F7FGT7 F7FGT7_MACMU, tr Q17QG8 Q17QG8_BOVIN | aGL<br>QFP<br>VGR | 95% | 52.6 | 51.84703 | Ref | Value Missing (-0.3170157) | 0.46                           | Value Missing (-0.60130364) | 0.18                           | 0.3                            | -0                             | -0.14                         | 4710                   | Value Missing (-0.3170157) | 6440                           | Value Missing (-0.60130364) | 6560                           | 6210                           | 5270                           | 4740                           | 416.9 | 1247.7 | 3 | 0.0057 | 4.565 |
| Histone H2A.x<br>OS=Homo sapiens<br>GN=H2AFX PE=1<br>SV=2 | sp P16104 H2AX_HUMAN, tr E2RNBO E2RNBO_CANFA, tr F7FGT7 F7FGT7_MACMU, tr Q17QG8 Q17QG8_BOVIN | aGL<br>QFP<br>VGR | 95% | 55.5 | 51.82312 | Ref | No Values (-0.21019465)    | Reference Missing (0.39134824) | No Values (-0.49448282)     | Reference Missing (0.23583135) | Reference Missing (0.18505676) | Reference Missing (0.30252373) | Reference Missing (0.1744924) | No Values (-0.4125847) | No Values (-0.21019465)    | Reference Missing (0.39134824) | No Values (-0.49448282)     | Reference Missing (0.23583135) | Reference Missing (0.18505676) | Reference Missing (0.30252373) | Reference Missing (0.17449234) | 416.9 | 1247.7 | 3 | 0.0094 | 7.496 |
| Histone H2A.x<br>OS=Homo sapiens<br>GN=H2AFX PE=1<br>SV=2 | sp P16104 H2AX_HUMAN, tr E2RNBO E2RNBO_CANFA, tr F7FGT7 F7FGT7_MACMU, tr Q17QG8 Q17QG8_BOVIN | aTQ<br>ASQ<br>EY  | 57% | 28.2 | 47.86027 | Ref | 1.4                        | 0.6                            | -1                          | -0.97                          | -0.94                          | -0.95                          | -0.95                         | 5000                   | 8710                       | 5400                           | 1990                        | 2250                           | 2010                           | 2080                           | 2060                           | 601.3 | 1200.6 | 2 | 0.0133 | 11.05 |



|                                                           |                                                                                              |               |     |      |          |     |       |      |      |       |       |       |       |       |        |       |        |        |       |       |        |       |        |   |        |       |
|-----------------------------------------------------------|----------------------------------------------------------------------------------------------|---------------|-----|------|----------|-----|-------|------|------|-------|-------|-------|-------|-------|--------|-------|--------|--------|-------|-------|--------|-------|--------|---|--------|-------|
| Histone H2A.x<br>OS=Homo sapiens<br>GN=H2AFX PE=1<br>SV=2 | sp P16104 H2AX_HUMAN, tr E2RNBO E2RNBO_CANFA, tr F7FGT7 F7FGT7_MACMU, tr Q17QG8 Q17QG8_BOVIN | aTQASQ<br>EY  | 95% | 50   | 48.19136 | Ref | 0.62  | 0.29 | -1.2 | -0.73 | -0.42 | -0.74 | -0.43 | 6590  | 4020   | 3480  | 1380   | 2130   | 2300  | 1920  | 2370   | 601.3 | 1200.6 | 2 | 0.0118 | 9.836 |
| Histone H2A.x<br>OS=Homo sapiens<br>GN=H2AFX PE=1<br>SV=2 | sp P16104 H2AX_HUMAN, tr E2RNBO E2RNBO_CANFA, tr F7FGT7 F7FGT7_MACMU, tr Q17QG8 Q17QG8_BOVIN | kATQAS<br>QEY | 67% | 34.7 | 52.59377 | Ref | -0.61 | 0.32 | -1.2 | 0.16  | 0.36  | -0    | 0.43  | 2500  | 1460   | 3010  | 1180   | 3350   | 3360  | 2720  | 3650   | 817.4 | 1632.9 | 2 | 0.0242 | 14.78 |
| Histone H2A.x<br>OS=Homo sapiens<br>GN=H2AFX PE=1<br>SV=2 | sp P16104 H2AX_HUMAN, tr E2RNBO E2RNBO_CANFA, tr F7FGT7 F7FGT7_MACMU, tr Q17QG8 Q17QG8_BOVIN | nDEE<br>LNK   | 81% | 38.4 | 52.58726 | Ref | -0.54 | 0.4  | -1.6 | 0.2   | 0.18  | 0.22  | 0.45  | 3E+05 | 193000 | 4E+05 | 116000 | 434000 | 4E+05 | 4E+05 | 468000 | 735.4 | 1468.8 | 2 | 0.0171 | 11.61 |

|                                                  |                                                                                                                                                                                                                                                                    |                     |     |      |          |     |        |       |       |       |       |       |       |       |       |       |       |       |       |       |       |       |      |   |        |       |
|--------------------------------------------------|--------------------------------------------------------------------------------------------------------------------------------------------------------------------------------------------------------------------------------------------------------------------|---------------------|-----|------|----------|-----|--------|-------|-------|-------|-------|-------|-------|-------|-------|-------|-------|-------|-------|-------|-------|-------|------|---|--------|-------|
| Caprin-1 OS=Homo sapiens<br>GN=CAPRIN1 PE=1 SV=2 | 4 CAPR1_HUMAN,sp Q1LZB6 CAPR1_BOVIN,sp Q5M9G3 CAPR1_RAT,sp Q60865 CAPR1_MOUSE,transcript E2RKU8 E2RKU8_CANFA,transcript E9PLA9 E9PLA9_HUMAN,transcript F1MPH9 F1MPH9_BOVIN,transcript F1NH0 F1NH0_BOVIN,transcript F1SGS6 F1SGS6_PIG,transcript Q3UFZ6 Q3UFZ6_AVSK | INQD<br>QLD<br>AVSk | 92% | 47.1 | 52.9722  | Ref | -0.061 | -0.17 | 0.053 | -0.24 | 0.008 | -0.39 | 0.083 | 24600 | 20700 | 20800 | 27300 | 24400 | 25400 | 20100 | 27800 | 613.7 | 1838 | 3 | 0.0121 | 6.558 |
| Caprin-1 OS=Homo sapiens<br>GN=CAPRIN1 PE=1 SV=2 | 4 CAPR1_HUMAN,sp Q1LZB6 CAPR1_BOVIN,sp Q5M9G3 CAPR1_RAT,sp Q60865 CAPR1_MOUSE,transcript E2RKU8 E2RKU8_CANFA,transcript E9PLA9 E9PLA9_HUMAN,transcript F1MPH9 F1MPH9_BOVIN,transcript F1NH0 F1NH0_BOVIN,transcript F1SGS6 F1SGS6_PIG,transcript Q3UFZ6 Q3UFZ6_AVSK | INQD<br>QLD<br>AVSk | 95% | 66.4 | 52.92872 | Ref | -0.37  | -0.26 | 0.17  | -0.16 | 0.22  | -0.68 | 0.23  | 20900 | 14700 | 17200 | 26000 | 22800 | 25800 | 14400 | 27000 | 920   | 1838 | 2 | 0.0107 | 5.826 |

|                                                  |                                                                                                                                                                                                                                                                |              |     |      |          |     |       |       |       |       |       |       |       |       |       |       |       |       |       |       |       |       |        |   |        |       |
|--------------------------------------------------|----------------------------------------------------------------------------------------------------------------------------------------------------------------------------------------------------------------------------------------------------------------|--------------|-----|------|----------|-----|-------|-------|-------|-------|-------|-------|-------|-------|-------|-------|-------|-------|-------|-------|-------|-------|--------|---|--------|-------|
| Caprin-1 OS=Homo sapiens<br>GN=CAPRIN1 PE=1 SV=2 | 4 CAPR1_HUMAN,sp Q1LZB6 CAPR1_BOVIN,sp Q5M9G3 CAPR1_RAT,sp Q60865 CAPR1_MOUSE,transcript E2RKU8 E2RKU8_CANFA,transcript E9PLA9 E9PLA9_HUMAN,transcript F1MPH9 F1MPH9_BOVIN,transcript F1NH0 F1NH0_BOVIN,transcript F1SGS6 F1SGS6_PIG,transcript Q3UFZ6 Q3UFZ6_ | qILG<br>VIDK | 79% | 34.4 | 48.47887 | Ref | -0.1  | -0.27 | -0.05 | -0.34 | 0.18  | -0.39 | 0.13  | 2410  | 1880  | 1810  | 2370  | 2140  | 2680  | 1890  | 2670  | 498.6 | 1492.9 | 3 | 0.0236 | 15.78 |
| Caprin-1 OS=Homo sapiens<br>GN=CAPRIN1 PE=1 SV=2 | 4 CAPR1_HUMAN,sp Q1LZB6 CAPR1_BOVIN,sp Q5M9G3 CAPR1_RAT,sp Q60865 CAPR1_MOUSE,transcript E2RKU8 E2RKU8_CANFA,transcript E9PLA9 E9PLA9_HUMAN,transcript F1MPH9 F1MPH9_BOVIN,transcript F1NH0 F1NH0_BOVIN,transcript F1SGS6 F1SGS6_PIG,transcript Q3UFZ6 Q3UFZ6_ | qILG<br>VIDK | 67% | 30.3 | 47.77137 | Ref | -0.27 | -0.03 | 0.058 | -0.16 | 0.086 | -0.47 | -0.05 | 29900 | 20500 | 26300 | 31300 | 29600 | 30700 | 21900 | 29000 | 498.7 | 1492.9 | 3 | 0.0049 | 3.273 |

|                                                  |                                                                                                                                                                                                                                                                   |               |     |      |          |     |        |       |       |       |       |      |       |      |      |      |      |      |      |      |      |       |        |   |        |       |
|--------------------------------------------------|-------------------------------------------------------------------------------------------------------------------------------------------------------------------------------------------------------------------------------------------------------------------|---------------|-----|------|----------|-----|--------|-------|-------|-------|-------|------|-------|------|------|------|------|------|------|------|------|-------|--------|---|--------|-------|
| Caprin-1 OS=Homo sapiens<br>GN=CAPRIN1 PE=1 SV=2 | 4 CAPR1_HUMAN,sp Q1LZB6 CAPR1_BOVIN,sp Q5M9G3 CAPR1_RAT,sp Q60865 CAPR1_MOUSE,transcript E2RKU8 E2RKU8_CANFA,transcript E9PLA9 E9PLA9_HUMAN,transcript F1MPH9 F1MPH9_BOVIN,transcript F1NH0 F1NH0_BOVIN,transcript F1SGS6 F1SGS6_PIG,transcript Q3UFZ6 Q3UFZ6_LDK | tVLE LQYV LDK | 89% | 43.1 | 51.47024 | Ref | -0.087 | -0.22 | 0.089 | -0.25 | -0.01 | -0.3 | -0.01 | 4290 | 3360 | 3320 | 4630 | 4030 | 4150 | 3550 | 4320 | 643.7 | 1928.1 | 3 | 0.0151 | 7.843 |
| Caprin-1 OS=Homo sapiens<br>GN=CAPRIN1 PE=1 SV=2 | 4 CAPR1_HUMAN,sp Q1LZB6 CAPR1_BOVIN,sp Q5M9G3 CAPR1_RAT,sp Q60865 CAPR1_MOUSE,transcript E2RKU8 E2RKU8_CANFA,transcript E9PLA9 E9PLA9_HUMAN,transcript F1MPH9 F1MPH9_BOVIN,transcript F1NH0 F1NH0_BOVIN,transcript F1SGS6 F1SGS6_PIG,transcript Q3UFZ6 Q3UFZ6_LDK | tVLE LQYV LDK | 87% | 41   | 51.47144 | Ref | 0.041  | -0.32 | 0.058 | -0.19 | -0.08 | -0.4 | 0.12  | 524  | 465  | 392  | 572  | 532  | 502  | 420  | 595  | 643.7 | 1928.1 | 3 | 0.0157 | 8.123 |

|                                                  |                                                                                                                                                                                                                                                                  |             |     |      |          |     |       |       |       |        |      |       |       |      |      |      |      |      |      |      |      |       |        |   |        |       |
|--------------------------------------------------|------------------------------------------------------------------------------------------------------------------------------------------------------------------------------------------------------------------------------------------------------------------|-------------|-----|------|----------|-----|-------|-------|-------|--------|------|-------|-------|------|------|------|------|------|------|------|------|-------|--------|---|--------|-------|
| Caprin-1 OS=Homo sapiens<br>GN=CAPRIN1 PE=1 SV=2 | 4 CAPR1_HUMAN,sp Q1LZB6 CAPR1_BOVIN,sp Q5M9G3 CAPR1_RAT,sp Q60865 CAPR1_MOUSE,transcript E2RKU8 E2RKU8_CANFA,transcript E9PLA9 E9PLA9_HUMAN,transcript F1MPH9 F1MPH9_BOVIN,transcript F1NH0 F1NH0_BOVIN,transcript F1SGS6 F1SGS6_PIG,transcript Q3UFZ6 Q3UFZ6_AK | yQEVTN NLEF | 67% | 37   | 54.52232 | Ref | -0.14 | -0.39 | -0    | -0.057 | -0   | -0.17 | 0.069 | 2310 | 1830 | 1680 | 2460 | 2610 | 2370 | 2200 | 2580 | 790.1 | 2367.3 | 3 | 0.0327 | 13.81 |
| Caprin-1 OS=Homo sapiens<br>GN=CAPRIN1 PE=1 SV=2 | 4 CAPR1_HUMAN,sp Q1LZB6 CAPR1_BOVIN,sp Q5M9G3 CAPR1_RAT,sp Q60865 CAPR1_MOUSE,transcript E2RKU8 E2RKU8_CANFA,transcript E9PLA9 E9PLA9_HUMAN,transcript F1MPH9 F1MPH9_BOVIN,transcript F1NH0 F1NH0_BOVIN,transcript F1SGS6 F1SGS6_PIG,transcript Q3UFZ6 Q3UFZ6_AK | yQEVTN NLEF | 95% | 64.7 | 54.10514 | Ref | -0.2  | -0.29 | 0.057 | -0.2   | 0.26 | -0.66 | 0.18  | 6310 | 4890 | 4970 | 7090 | 6550 | 7850 | 4330 | 7700 | 1033  | 2064.1 | 2 | #####  | 0.125 |

|                                            |                                                                      |                  |     |      |          |     |        |      |       |        |       |      |       |       |       |       |       |       |       |       |       |       |        |   |        |       |
|--------------------------------------------|----------------------------------------------------------------------|------------------|-----|------|----------|-----|--------|------|-------|--------|-------|------|-------|-------|-------|-------|-------|-------|-------|-------|-------|-------|--------|---|--------|-------|
| Fibronectin OS=Bos taurus GN=FN1 PE=1 SV=4 | sp P07589 FINC_BOVIN, tr B8Y9S9 B8Y9S9_BOVIN, tr B8Y9T0 B8Y9T0_BOVIN | cDP HEA TcYD DGk | 57% | 24.7 | 44.26121 | Ref | -0.078 | 0.45 | -0.37 | 0.05   | 0.16  | 0.21 | 0.084 | 28600 | 23100 | 36100 | 23000 | 33900 | 32100 | 34700 | 31500 | 718.6 | 2152.9 | 3 | 0.0191 | 8.867 |
| Fibronectin OS=Bos taurus GN=FN1 PE=1 SV=4 | sp P07589 FINC_BOVIN, tr B8Y9S9 B8Y9S9_BOVIN, tr B8Y9T0 B8Y9T0_BOVIN | cTcV GnG R       | 78% | 24.8 | 40.17326 | Ref | 0.011  | 0.54 | -0.12 | -0.18  | -0.03 | 0.29 | 0.007 | 10500 | 9070  | 14200 | 10100 | 10700 | 10300 | 13500 | 11000 | 603.8 | 1205.5 | 2 | 0.0106 | 8.778 |
| Fibronectin OS=Bos taurus GN=FN1 PE=1 SV=4 | sp P07589 FINC_BOVIN, tr B8Y9S9 B8Y9S9_BOVIN, tr B8Y9T0 B8Y9T0_BOVIN | eSkP LTAQ QAT k  | 79% | 38.2 | 52.39507 | Ref | 0.033  | 0.47 | -0.35 | 0.075  | -0.23 | 0.59 | -0.31 | 8640  | 7230  | 10600 | 6770  | 10000 | 7090  | 13000 | 6930  | 738.8 | 2213.3 | 3 | 0.0407 | 18.38 |
| Fibronectin OS=Bos taurus GN=FN1 PE=1 SV=4 | sp P07589 FINC_BOVIN, tr B8Y9S9 B8Y9S9_BOVIN, tr B8Y9T0 B8Y9T0_BOVIN | fTNV GPD TMR     | 82% | 36.7 | 50.80431 | Ref | 0.044  | 0.84 | -0.54 | -0.09  | -0.32 | 0.61 | -0.3  | 37900 | 38300 | 72300 | 31100 | 46900 | 35000 | 69400 | 36600 | 721.4 | 1440.7 | 2 | 0.0115 | 7.942 |
| Fibronectin OS=Bos taurus GN=FN1 PE=1 SV=4 | sp P07589 FINC_BOVIN, tr B8Y9S9 B8Y9S9_BOVIN, tr B8Y9T0 B8Y9T0_BOVIN | gATY NIIV EAVK   | 76% | 36.3 | 51.44886 | Ref | -0.15  | 0.64 | -0.23 | -0.076 | -0.19 | 0.49 | -0.12 | 7830  | 6150  | 11600 | 7070  | 8670  | 6990  | 11700 | 7630  | 629.4 | 1885.1 | 3 | 0.0085 | 4.492 |
| Fibronectin OS=Bos taurus GN=FN1 PE=1 SV=4 | sp P07589 FINC_BOVIN, tr B8Y9S9 B8Y9S9_BOVIN, tr B8Y9T0 B8Y9T0_BOVIN | sTTP DITG YR     | 53% | 30.7 | 51.06548 | Ref | -0.11  | 0.75 | -0.78 | -0.084 | -0.33 | 0.81 | -0.3  | 50900 | 41900 | 82700 | 32200 | 57300 | 42200 | 97100 | 44600 | 707.9 | 1413.7 | 2 | 0.0127 | 8.953 |

|                                                              |                                                                                                                                                                                                                    |               |     |     |      |          |     |        |       |       |       |       |       |       |       |       |       |       |       |       |       |       |       |        |   |        |       |
|--------------------------------------------------------------|--------------------------------------------------------------------------------------------------------------------------------------------------------------------------------------------------------------------|---------------|-----|-----|------|----------|-----|--------|-------|-------|-------|-------|-------|-------|-------|-------|-------|-------|-------|-------|-------|-------|-------|--------|---|--------|-------|
| Fibronectin OS=Bos taurus GN=FN1 PE=1 SV=4                   | sp P07589 FINC_BOVIN,tr B8Y9S9 B8Y9S9_BOVIN,tr B8Y9T0 B8Y9T0_BOVIN                                                                                                                                                 | ySfc TDH TVLV | QTR | 50% | 33.6 | 54.18939 | Ref | -0.081 | 0.48  | -0.19 | 0.047 | -0.07 | 0.39  | 0.071 | 3450  | 3090  | 4940  | 3490  | 4540  | 3660  | 5240  | 4180  | 775.4 | 2323.2 | 3 | 0.0151 | 6.487 |
| 40S ribosomal protein S28 OS=Homo sapiens GN=RPS28 PE=1 SV=1 | 7 RS28_HUMAN,sp P62858 RS28_MOUSE,sp P62859 RS28_RAT,sp Q56JX6 RS28_BOVIN,sp Q6QAT1 RS28_PIG,tr B2R4R9 B2R4R9_HUMAN,tr D2HZS4 D2HZS4_AILME,tr E2RNL7 E2RNL7_CANFA,tr F6WVD1 F6WVD1_HUMAN,sp F6WXM1 F6WXM1_CALIA,tr | eGD VLTL LESE | R   | 95% | 50.4 | 52.95072 | Ref | -0.22  | 0.022 | 0.29  | 0.18  | 0.4   | -0.09 | 0.42  | 13600 | 10200 | 13100 | 17600 | 18100 | 18400 | 13600 | 19200 | 832.9 | 1663.9 | 2 | 0.0144 | 8.638 |

|                                                                       |                                                                                                                                                                                                                                                                                                                            |                         |     |      |          |     |        |       |      |       |      |       |      |       |       |       |       |       |       |       |       |       |        |   |        |       |
|-----------------------------------------------------------------------|----------------------------------------------------------------------------------------------------------------------------------------------------------------------------------------------------------------------------------------------------------------------------------------------------------------------------|-------------------------|-----|------|----------|-----|--------|-------|------|-------|------|-------|------|-------|-------|-------|-------|-------|-------|-------|-------|-------|--------|---|--------|-------|
| 40S ribosomal protein S28<br>OS=Homo sapiens<br>GN=RPS28 PE=1<br>SV=1 | 7 RS28_H<br>UMAN,sp<br> P62858 <br>RS28_MO<br>USE,sp P6<br>2859 RS2<br>8_RAT,sp<br> Q56JX6 <br>RS28_BO<br>VIN,sp Q<br>6QAT1 RS<br>28_PIG,tr<br> B2R4R9 <br>B2R4R9_<br>HUMAN,t<br>r D2HZS4<br> D2HZS4_<br>AILME,tr <br>E2RNL7 E<br>2RNL7_CA<br>NFA,tr F6<br>WVD1 F6<br>WVD1_H<br>ORSE,tr F<br>6WXM1 F<br>6WXM1_<br>CALJA,tr | eGD<br>VLT<br>LESE<br>R | 95% | 51.4 | 52.98377 | Ref | -0.084 | 0.015 | 0.31 | 0.089 | 0.39 | -0.14 | 0.46 | 15200 | 12800 | 14900 | 20500 | 19400 | 20900 | 15000 | 22600 | 833   | 1663.9 | 2 | 0.0063 | 3.796 |
| 40S ribosomal protein S28<br>OS=Homo sapiens<br>GN=RPS28 PE=1<br>SV=1 | 7 RS28_H<br>UMAN,sp<br> P62858 <br>RS28_MO<br>USE,sp P6<br>2859 RS2<br>8_RAT,sp<br> Q56JX6 <br>RS28_BO<br>VIN,sp Q<br>6QAT1 RS<br>28_PIG,tr<br> B2R4R9 <br>B2R4R9_<br>HUMAN,t<br>r D2HZS4<br> D2HZS4_<br>AILME,tr <br>E2RNL7 E<br>2RNL7_CA<br>NFA,tr F6<br>WVD1 F6<br>WVD1_H<br>ORSE,tr F<br>6WXM1 F<br>6WXM1_<br>CALJA,tr | eGD<br>VLT<br>LESE<br>R | 95% | 52   | 52.95783 | Ref | -0.21  | 0.081 | 0.32 | 0.14  | 0.36 | 0.056 | 0.34 | 1950  | 1510  | 2000  | 2660  | 2580  | 2620  | 2220  | 2680  | 832.9 | 1663.9 | 2 | 0.0116 | 6.956 |



|                                                                                 |                                                                                                                                                                                                                                                                                                                                                              |                                   |            |             |                 |            |              |              |             |               |             |             |             |              |             |             |              |              |              |              |              |              |               |          |               |              |
|---------------------------------------------------------------------------------|--------------------------------------------------------------------------------------------------------------------------------------------------------------------------------------------------------------------------------------------------------------------------------------------------------------------------------------------------------------|-----------------------------------|------------|-------------|-----------------|------------|--------------|--------------|-------------|---------------|-------------|-------------|-------------|--------------|-------------|-------------|--------------|--------------|--------------|--------------|--------------|--------------|---------------|----------|---------------|--------------|
| <p>40S ribosomal protein S28<br/>OS=Homo sapiens<br/>GN=RPS28 PE=1<br/>SV=1</p> | <p>7 RS28_H<br/>UMAN,sp<br/> P62858 <br/>RS28_MO<br/>USE,sp P6<br/>2859 RS2<br/>8_RAT,sp<br/> Q56JX6 <br/>RS28_BO<br/>VIN,sp Q<br/>6QAT1 RS<br/>28_PIG,tr<br/> B2R4R9 <br/>B2R4R9_<br/>HUMAN,t<br/>r D2HZS4<br/> D2HZS4_<br/>AILME,tr <br/>E2RNL7 E<br/>2RNL7_CA<br/>NFA,tr F6<br/>WVD1 F6<br/>WVD1_H<br/>ORSE,tr F<br/>6WXM1 F<br/>6WXM1_<br/>CALJA,tr </p> | <p>tGSQ<br/>GQc<br/>TQV<br/>R</p> | <p>79%</p> | <p>34.3</p> | <p>49.15368</p> | <p>Ref</p> | <p>-0.14</p> | <p>0.017</p> | <p>0.27</p> | <p>0.22</p>   | <p>0.2</p>  | <p>0.13</p> | <p>0.18</p> | <p>11800</p> | <p>8000</p> | <p>9680</p> | <p>13000</p> | <p>13800</p> | <p>11900</p> | <p>11900</p> | <p>12100</p> | <p>757.9</p> | <p>1513.7</p> | <p>2</p> | <p>0.0135</p> | <p>8.925</p> |
| <p>40S ribosomal protein S28<br/>OS=Homo sapiens<br/>GN=RPS28 PE=1<br/>SV=1</p> | <p>7 RS28_H<br/>UMAN,sp<br/> P62858 <br/>RS28_MO<br/>USE,sp P6<br/>2859 RS2<br/>8_RAT,sp<br/> Q56JX6 <br/>RS28_BO<br/>VIN,sp Q<br/>6QAT1 RS<br/>28_PIG,tr<br/> B2R4R9 <br/>B2R4R9_<br/>HUMAN,t<br/>r D2HZS4<br/> D2HZS4_<br/>AILME,tr <br/>E2RNL7 E<br/>2RNL7_CA<br/>NFA,tr F6<br/>WVD1 F6<br/>WVD1_H<br/>ORSE,tr F<br/>6WXM1 F<br/>6WXM1_<br/>CALJA,tr </p> | <p>tGSQ<br/>GQc<br/>TQV<br/>R</p> | <p>88%</p> | <p>38.3</p> | <p>49.27334</p> | <p>Ref</p> | <p>0.048</p> | <p>-0.03</p> | <p>0.39</p> | <p>-0.071</p> | <p>0.22</p> | <p>0.12</p> | <p>0.27</p> | <p>4730</p>  | <p>3890</p> | <p>3990</p> | <p>6000</p>  | <p>4810</p>  | <p>5140</p>  | <p>5010</p>  | <p>5530</p>  | <p>757.9</p> | <p>1513.7</p> | <p>2</p> | <p>0.0124</p> | <p>8.199</p> |

|                                                                       |                                                                                                                                                                                                                          |                   |     |      |          |     |                               |                        |                         |                               |                        |                       |                        |                               |                        |                         |                               |                        |                       |                       |        |        |        |        |        |       |
|-----------------------------------------------------------------------|--------------------------------------------------------------------------------------------------------------------------------------------------------------------------------------------------------------------------|-------------------|-----|------|----------|-----|-------------------------------|------------------------|-------------------------|-------------------------------|------------------------|-----------------------|------------------------|-------------------------------|------------------------|-------------------------|-------------------------------|------------------------|-----------------------|-----------------------|--------|--------|--------|--------|--------|-------|
| 40S ribosomal protein S28<br>OS=Homo sapiens<br>GN=RPS28 PE=1<br>SV=1 | 7 RS28_HUMAN,sp P62858 RS28_MOUSE,sp P62859 RS28_RAT,sp Q56JX6 RS28_BOVIN,sp Q6QAT1 RS28_PIG,tri B2R4R9 B2R4R9_HUMAN,tri D2HZS4 D2HZS4_AILME,tri E2RNL7 E2RNL7_CANFA,tri F6WVD1 F6WVD1_HORSE,tri F6WXM1 F6WXM1_CALJA,tri | tGSq<br>GqcT      | 67% | 30.6 | 48.59415 | Ref | Reference Missing (1.3465909) | No Values (-0.4251612) | No Values (-0.59175605) | Reference Missing (1.1094838) | No Values (-0.5363265) | No Values (-0.599555) | No Values (-0.5098578) | Reference Missing (1.3465909) | No Values (-0.4251612) | No Values (-0.59175605) | Reference Missing (1.1094838) | No Values (-0.5363265) | No Values (-0.599555) | No Values (-0.588255) | 758.9  | 1515.7 | 2      | 0.0158 | 10.39  |       |
| 40S ribosomal protein S28<br>OS=Homo sapiens<br>GN=RPS28 PE=1<br>SV=1 | 7 RS28_HUMAN,sp P62858 RS28_MOUSE,sp P62859 RS28_RAT,sp Q56JX6 RS28_BOVIN,sp Q6QAT1 RS28_PIG,tri B2R4R9 B2R4R9_HUMAN,tri D2HZS4 D2HZS4_AILME,tri E2RNL7 E2RNL7_CANFA,tri F6WVD1 F6WVD1_HORSE,tri F6WXM1 F6WXM1_CALJA,tri | VEF<br>MDD<br>TSR | 87% | 36.3 | 48.35545 | Ref | -0.09                         | 0.17                   | 0.32                    | 0.042                         | 0.38                   | -0.07                 | 0.3                    | 81600                         | 66400                  | 86400                   | 107000                        | 97700                  | 1E+05                 | 82200                 | 106000 | 702.3  | 1402.7 | 2      | 0.0117 | 8.333 |

|                                                                    |                                                                                                                                                                                                                    |                           |     |      |          |     |       |       |      |       |       |       |       |       |       |       |       |       |       |       |       |       |        |   |        |       |
|--------------------------------------------------------------------|--------------------------------------------------------------------------------------------------------------------------------------------------------------------------------------------------------------------|---------------------------|-----|------|----------|-----|-------|-------|------|-------|-------|-------|-------|-------|-------|-------|-------|-------|-------|-------|-------|-------|--------|---|--------|-------|
| 40S ribosomal protein S28<br>OS=Homo sapiens<br>GN=RPS28 PE=1 SV=1 | 7 RS28_HUMAN,sp P62858 RS28_MOUSE,sp P62859 RS28_RAT,sp Q56JX6 RS28_BOVIN,sp Q6QAT1 RS28_PIG,tr B2R4R9 B2R4R9_HUMAN,tr D2HZS4 D2HZS4_AILME,tr E2RNL7 E2RNL7_CANFA,tr F6WVD1 F6WVD1_HORSE,tr F6WXM1 F6WXM1_CAJLA,tr | VEF<br>MDD<br>TSR         | 86% | 36.3 | 48.3988  | Ref | 0.037 | 0.058 | 0.21 | 0.094 | 0.42  | -0.09 | 0.37  | 37500 | 34600 | 38100 | 47400 | 48300 | 52800 | 38900 | 52900 | 702.3 | 1402.7 | 2 | 0.0108 | 7.72  |
| Transthyretin<br>OS=Bos taurus<br>GN=TTR PE=1 SV=1                 | sp O46375 TTHY_BOVIN,sp P12303 TTHY_SHEEP                                                                                                                                                                          | aAD<br>ETW<br>EPFA<br>SGk | 55% | 33.8 | 53.51158 | Ref | 0.49  | 0.33  | 0.53 | 0.4   | 0.47  | 0.44  | 0.29  | 18700 | 21000 | 20400 | 26200 | 26500 | 24200 | 24900 | 22300 | 673   | 2016   | 3 | 0.0219 | 10.86 |
| Transthyretin<br>OS=Bos taurus<br>GN=TTR PE=1 SV=1                 | sp O46375 TTHY_BOVIN,sp P12303 TTHY_SHEEP                                                                                                                                                                          | aAD<br>ETW<br>EPFA<br>SGk | 94% | 50.9 | 53.51611 | Ref | 0.32  | 0.33  | 0.73 | 0.35  | 0.075 | 1     | -0.08 | 27000 | 28700 | 31400 | 46600 | 39600 | 28500 | 57200 | 26500 | 673   | 2016   | 3 | 0.019  | 9.406 |
| Transthyretin<br>OS=Bos taurus<br>GN=TTR PE=1 SV=1                 | sp O46375 TTHY_BOVIN,sp P12303 TTHY_SHEEP                                                                                                                                                                          | aAD<br>ETW<br>EPFA<br>SGk | 95% | 49.4 | 53.56477 | Ref | 0.29  | 0.27  | 0.56 | 0.53  | 0.065 | 0.86  | 0.23  | 5870  | 5750  | 6160  | 8430  | 9090  | 5760  | 10500 | 6710  | 1009  | 2016   | 2 | 0.0182 | 9.006 |

|                                                                      |                                           |                                |     |      |          |     |      |       |      |      |       |      |       |       |        |       |        |        |       |       |        |       |        |   |        |       |
|----------------------------------------------------------------------|-------------------------------------------|--------------------------------|-----|------|----------|-----|------|-------|------|------|-------|------|-------|-------|--------|-------|--------|--------|-------|-------|--------|-------|--------|---|--------|-------|
| Transthyretin<br>OS=Bos taurus<br>GN=TTR PE=1 SV=1                   | sp O46375 TTHY_BOVIN,sp P12303 TTHY_SHEEP | aAD<br>ETW<br>EPFA<br>SGk      | 95% | 52.3 | 53.59282 | Ref | 0.38 | 0.35  | 0.62 | 0.49 | 0.12  | 0.96 | -0.01 | 11000 | 13200  | 14100 | 19100  | 19200  | 13000 | 24300 | 12300  | 1009  | 2016   | 2 | 0.0179 | 8.887 |
| Transthyretin<br>OS=Bos taurus<br>GN=TTR PE=1 SV=1                   | sp O46375 TTHY_BOVIN,sp P12303 TTHY_SHEEP | gSPA<br>ANV<br>GVk             | 87% | 39.1 | 51.04105 | Ref | 0.42 | 0.4   | 0.52 | 0.56 | 0.03  | 0.8  | 0.11  | 26700 | 29000  | 30900 | 37900  | 42900  | 25900 | 46100 | 28500  | 754.4 | 1506.9 | 2 | 0.0209 | 13.83 |
| Transthyretin<br>OS=Bos taurus<br>GN=TTR PE=1 SV=1                   | sp O46375 TTHY_BOVIN,sp P12303 TTHY_SHEEP | gSPA<br>ANV<br>GVk             | 95% | 46.9 | 51.13121 | Ref | 0.25 | 0.55  | 0.44 | 0.56 | 0.26  | 0.79 | 0.15  | 7240  | 7930   | 10600 | 11000  | 13200  | 9360  | 14100 | 8990   | 754.4 | 1506.9 | 2 | 0.025  | 16.57 |
| Transthyretin<br>OS=Bos taurus<br>GN=TTR PE=1 SV=1                   | sp O46375 TTHY_BOVIN,sp P12303 TTHY_SHEEP | gSPA<br>ANV<br>GVk             | 84% | 38.9 | 50.85929 | Ref | 0.25 | 0.36  | 0.66 | 0.63 | -0.08 | 0.93 | 0.077 | 1E+05 | 143000 | 2E+05 | 232000 | 249000 | 1E+05 | 3E+05 | 154000 | 503.3 | 1506.9 | 3 | 0.0145 | 9.602 |
| Transthyretin<br>OS=Bos taurus<br>GN=TTR PE=1 SV=1                   | sp O46375 TTHY_BOVIN,sp P12303 TTHY_SHEEP | kAA<br>DET<br>WEP<br>FASG<br>k | 67% | 37.2 | 54.67127 | Ref | 0.46 | 0.043 | 0.74 | 0.5  | 0.13  | 0.88 | 0.093 | 7230  | 8790   | 7160  | 13000  | 12200  | 8240  | 14400 | 8290   | 817.1 | 2448.3 | 3 | 0.0149 | 6.078 |
| Collagen alpha-2(I)<br>chain OS=Bos<br>taurus GN=COL1A2<br>PE=1 SV=2 | sp P02465 CO1A2_BOVIN                     | dGN<br>PGN<br>DGP<br>PGR       | 95% | 55.3 | 48.91822 | Ref | -1.4 | 1.5   | -1.8 | 0.15 | -1.4  | 1.2  | -2    | 7490  | 2190   | 17500 | 2020   | 8540   | 2550  | 16000 | 1760   | 728.9 | 1455.7 | 2 | 0.0122 | 8.358 |
| Collagen alpha-2(I)<br>chain OS=Bos<br>taurus GN=COL1A2<br>PE=1 SV=2 | sp P02465 CO1A2_BOVIN                     | dYEV<br>DATL<br>k              | 88% | 41.6 | 52.87331 | Ref | -1.3 | 1.3   | -1.5 | 0.16 | -1.3  | 1.3  | -1.7  | 17700 | 5710   | 38100 | 6300   | 21300  | 6710  | 43200 | 5400   | 831.5 | 1660.9 | 2 | 0.0182 | 10.92 |

|                                                                      |                       |                                                                    |     |      |          |     |       |      |       |        |       |      |       |       |      |       |      |       |      |       |      |       |        |   |        |       |
|----------------------------------------------------------------------|-----------------------|--------------------------------------------------------------------|-----|------|----------|-----|-------|------|-------|--------|-------|------|-------|-------|------|-------|------|-------|------|-------|------|-------|--------|---|--------|-------|
| Collagen alpha-2(I)<br>chain OS=Bos<br>taurus GN=COL1A2<br>PE=1 SV=2 | sp P02465 CO1A2_BOVIN | gDG<br>GPP<br>GAT<br>GFP<br>GAA<br>GR                              | 93% | 44.9 | 51.95883 | Ref | -1.9  | 1.6  | -2.7  | 0.15   | -1.9  | 1.4  | -2.5  | 6950  | 1570 | 20300 | 1150 | 9040  | 1870 | 19300 | 1290 | 873.4 | 1744.9 | 2 | 0.0127 | 7.259 |
| Collagen alpha-2(I)<br>chain OS=Bos<br>taurus GN=COL1A2<br>PE=1 SV=2 | sp P02465 CO1A2_BOVIN | gEA<br>GPA<br>GPA<br>GPA<br>GPR                                    | 69% | 34.6 | 52.14685 | Ref | -1    | 1.2  | -0.78 | 0.13   | -0.56 | 0.65 | -0.22 | 10100 | 3910 | 19200 | 5570 | 11600 | 6250 | 15100 | 8200 | 783.4 | 1564.8 | 2 | 0.0146 | 9.34  |
| Collagen alpha-2(I)<br>chain OS=Bos<br>taurus GN=COL1A2<br>PE=1 SV=2 | sp P02465 CO1A2_BOVIN | gHn<br>GLQ<br>GLP<br>GLA<br>GHH<br>GDQ<br>GAP<br>GAV<br>GPA<br>GPR | 79% | 39.6 | 55.61838 | Ref | 0.26  | 0.15 | -0.07 | 0.078  | -0.15 | 0.47 | 0.17  | 4030  | 4550 | 4570  | 4430 | 5400  | 4020 | 6440  | 5210 | 765.1 | 3056.5 | 4 | 0.0204 | 6.67  |
| Collagen alpha-2(I)<br>chain OS=Bos<br>taurus GN=COL1A2<br>PE=1 SV=2 | sp P02465 CO1A2_BOVIN | gIPG<br>PVG<br>AAG<br>ATG<br>AR                                    | 92% | 44.3 | 52.42616 | Ref | -0.79 | 1.3  | -1.1  | -0.048 | -0.79 | 0.99 | -0.94 | 13800 | 6900 | 32800 | 7000 | 15500 | 8100 | 29200 | 7560 | 778.4 | 1554.9 | 2 | 0.0132 | 8.462 |
| Collagen alpha-2(I)<br>chain OS=Bos<br>taurus GN=COL1A2<br>PE=1 SV=2 | sp P02465 CO1A2_BOVIN | gSTG<br>EIGP<br>AGP<br>PGP<br>PGLR                                 | 93% | 46.5 | 53.75504 | Ref | -1.3  | 1.4  | -1.7  | 0.22   | -1.4  | 1.2  | -1.5  | 4850  | 1790 | 12600 | 1620 | 6740  | 1860 | 12500 | 1850 | 961   | 1920   | 2 | 0.0145 | 7.549 |

|                                                                                  |                                                                                                                                                                                    |                   |     |      |          |     |        |       |       |       |       |       |      |       |       |       |       |       |       |       |       |       |        |   |        |       |
|----------------------------------------------------------------------------------|------------------------------------------------------------------------------------------------------------------------------------------------------------------------------------|-------------------|-----|------|----------|-----|--------|-------|-------|-------|-------|-------|------|-------|-------|-------|-------|-------|-------|-------|-------|-------|--------|---|--------|-------|
| Stress-induced-phosphoprotein 1<br>OS=Rattus norvegicus<br>GN=Stip1 PE=1<br>SV=1 | sp O35814 STIP1_RAT,sp P31948 STIP1_HUMAN,sp Q60864 STIP1_MOUSE,tra A8K690 A8K690_HUMAN,tra B4DM70 B4DM70_HUMAN,tra F5H0T1 F5H0T1_HUMAN,tra F6SR Y5 F6SR Y5_CALJA,tra Q3THQ5_MOUSE | aLDL<br>DSSc<br>k | 92% | 42.9 | 51.47612 | Ref | -0.054 | -0.34 | -0.02 | -0.13 | 0.049 | -0.48 | -0.1 | 22800 | 19100 | 17000 | 23800 | 24300 | 24000 | 17300 | 22400 | 803.4 | 1604.8 | 2 | 0.0258 | 16.1  |
|                                                                                  | sp O35814 STIP1_RAT,sp P31948 STIP1_HUMAN,sp Q60864 STIP1_MOUSE,tra A8K690 A8K690_HUMAN,tra B4DM70 B4DM70_HUMAN,tra F5H0T1 F5H0T1_HUMAN,tra F6SR Y5 F6SR Y5_CALJA,tra Q3THQ5_MOUSE | IIIEQ<br>MQk      | 80% | 37.1 | 51.72507 | Ref | 0.1    | -0.31 | -0.09 | -0.26 | 0.12  | -0.39 | -0.4 | 7870  | 6820  | 5540  | 7250  | 7100  | 8090  | 5930  | 5850  | 806   | 1610   | 2 | 0.0095 | 5.893 |

|                                                                                  |                                                                                                                                                                                      |                    |     |      |          |     |       |       |       |       |       |       |       |      |      |      |      |      |      |      |      |       |        |   |        |       |
|----------------------------------------------------------------------------------|--------------------------------------------------------------------------------------------------------------------------------------------------------------------------------------|--------------------|-----|------|----------|-----|-------|-------|-------|-------|-------|-------|-------|------|------|------|------|------|------|------|------|-------|--------|---|--------|-------|
| Stress-induced-phosphoprotein 1<br>OS=Rattus norvegicus<br>GN=Stip1 PE=1<br>SV=1 | sp O35814 STIP1_RAT,sp P31948 STIP1_HUMAN,sp Q60864 STIP1_MOUSE,tr A8K690 A8K690_HUMAN,tr B4DM70 B4DM70_HUMAN,tr F5H0T1 F5H0T1_HUMAN,tr F6SR Y5 F6SRY5_CALJA, tr Q3THQ5 Q3THQ5_MOUSE | ILEF<br>QLAL<br>k  | 93% | 42   | 46.88909 | Ref | 0.15  | -0.43 | -0.08 | -0.27 | -0.24 | -0.21 | 0.079 | 3570 | 3650 | 2660 | 3810 | 3680 | 3280 | 3490 | 4230 | 561.7 | 1682.1 | 3 | 0.0057 | 3.408 |
| Stress-induced-phosphoprotein 1<br>OS=Rattus norvegicus<br>GN=Stip1 PE=1<br>SV=1 | sp O35814 STIP1_RAT,sp P31948 STIP1_HUMAN,sp Q60864 STIP1_MOUSE,tr A8K690 A8K690_HUMAN,tr B4DM70 B4DM70_HUMAN,tr F5H0T1 F5H0T1_HUMAN,tr F6SR Y5 F6SRY5_CALJA, tr Q3THQ5 Q3THQ5_MOUSE | IMD<br>VGLI<br>AIR | 95% | 72.3 | 50.83012 | Ref | 0.008 | -0.24 | 0.023 | -0.19 | 0.07  | -0.58 | -0.05 | 2940 | 2800 | 2560 | 3450 | 3270 | 3430 | 2280 | 3270 | 469   | 1403.8 | 3 | 0.0071 | 5.019 |

|                                                                         |                                                                                                                                                                                      |            |     |      |          |     |      |       |       |        |       |       |       |     |     |     |     |     |     |     |      |       |        |   |        |       |
|-------------------------------------------------------------------------|--------------------------------------------------------------------------------------------------------------------------------------------------------------------------------------|------------|-----|------|----------|-----|------|-------|-------|--------|-------|-------|-------|-----|-----|-----|-----|-----|-----|-----|------|-------|--------|---|--------|-------|
| Stress-induced-phosphoprotein 1 OS=Rattus norvegicus GN=Stip1 PE=1 SV=1 | sp O35814 STIP1_RAT,sp P31948 STIP1_HUMAN,sp Q60864 STIP1_MOUSE,tr A8K690 A8K690_HUMAN,tr B4DM70 B4DM70_HUMAN,tr F5H0T1 F5H0T1_HUMAN,tr F6SR Y5 F6SRY5_CALJA, tr Q3THQ5 Q3THQ5_MOUSE | mEQ VNEL k | 79% | 35.9 | 50.8888  | Ref | 0.26 | -0.65 | -0.31 | -0.014 | -0.02 | -0.62 | -0.14 | 518 | 463 | 268 | 380 | 515 | 449 | 309 | 428  | 668.9 | 1335.7 | 2 | 0.0116 | 8.66  |
| Stress-induced-phosphoprotein 1 OS=Rattus norvegicus GN=Stip1 PE=1 SV=1 | sp O35814 STIP1_RAT,sp P31948 STIP1_HUMAN,sp Q60864 STIP1_MOUSE,tr A8K690 A8K690_HUMAN,tr B4DM70 B4DM70_HUMAN,tr F5H0T1 F5H0T1_HUMAN,tr F6SR Y5 F6SRY5_CALJA, tr Q3THQ5 Q3THQ5_MOUSE | mEQ VNEL k | 75% | 34.8 | 50.89347 | Ref | 0.19 | -0.4  | -0.29 | -0.35  | -0.22 | -0.39 | 0.26  | 985 | 959 | 694 | 838 | 885 | 849 | 788 | 1220 | 668.9 | 1335.7 | 2 | 0.013  | 9.752 |



|                                                                         |                                                                                                                                                                                                                            |              |     |      |          |     |        |       |       |        |      |       |       |       |       |       |       |       |       |       |       |       |        |   |        |       |
|-------------------------------------------------------------------------|----------------------------------------------------------------------------------------------------------------------------------------------------------------------------------------------------------------------------|--------------|-----|------|----------|-----|--------|-------|-------|--------|------|-------|-------|-------|-------|-------|-------|-------|-------|-------|-------|-------|--------|---|--------|-------|
| Stress-induced-phosphoprotein 1 OS=Rattus norvegicus GN=Stip1 PE=1 SV=1 | sp O35814 STIP1_RAT,sp P31948 STIP1_HUMAN,sp Q60864 STIP1_MOUSE,tr A8K690 A8K690_HUMAN,tr B4DM70 B4DM70_HUMAN,tr F5H0T1 F5H0T1_HUMAN,tr F6SR Y5 F6SR Y5_CALJA, tr Q3THQ5 Q3THQ5_MOUSE                                      | sAAY Ak      | 60% | 30.9 | 50.07236 | Ref | -0.079 | -0.26 | -0.21 | -0.082 | 0.16 | -0.34 | -0.22 | 16900 | 14100 | 13500 | 15700 | 18900 | 19500 | 14500 | 15600 | 609.9 | 1217.7 | 2 | 0.0051 | 4.187 |
| 60S ribosomal protein L7a OS=Mus musculus GN=Rpl7a PE=2 SV=2            | 0 RL7A_MOUSE,sp P62424 RL7A_HUMAN,sp P62425 RL7A_RAT,sp Q2TBQ5 RL7A_BOVIN,sp Q4R5C2 RL7A_MACFA, tr BOK021 BOK021_RAT, tr D3YVE6 D3YVE6_MOUSE, tr D3YXT4 D3YXT4_MOUSE, tr D3Z3R0 D3Z3R0_MOUSE, tr D3ZPL5 D3ZPL5_RAT, tr D3Z | kVAP APA VVk | 67% | 28.1 | 45.7179  | Ref | 0.014  | -0.01 | 0.18  | 0.043  | 0.4  | -0.21 | 0.31  | 14100 | 12100 | 12900 | 16500 | 16500 | 18500 | 12700 | 18100 | 631.4 | 1891.2 | 3 | 0.037  | 19.57 |

|                                                              |                                                                                                                                                                                                                      |                                  |     |      |          |     |       |       |      |       |      |       |      |       |       |       |       |       |       |       |       |       |        |   |        |      |
|--------------------------------------------------------------|----------------------------------------------------------------------------------------------------------------------------------------------------------------------------------------------------------------------|----------------------------------|-----|------|----------|-----|-------|-------|------|-------|------|-------|------|-------|-------|-------|-------|-------|-------|-------|-------|-------|--------|---|--------|------|
| 60S ribosomal protein L7a OS=Mus musculus GN=Rpl7a PE=2 SV=2 | 0 RL7A_MOUSE,sp P62424 RL7A_HUMAN,sp P62425 RL7A_RAT,sp Q2TBQ5 RL7A_BOVIN,sp Q4R5C2 RL7A_MAFCA,tr BOK021 BOK021_RAT,tr D3YVE6 D3YVE6_MOUSE,tr D3YXT4 D3YXT4_MOUSE,tr D3Z3R0 D3Z3R0_MOUSE,tr D3ZPL5 D3ZPL5_RAT,tr D3Z | kVAP<br>APA<br>Vvk               | 82% | 32.2 | 44.99357 | Ref | 0.039 | 0.038 | 0.26 | 0.069 | 0.42 | -0.18 | 0.2  | 14900 | 14000 | 15200 | 19900 | 19200 | 21400 | 14700 | 19100 | 631.4 | 1891.2 | 3 | 0.0354 | 18.7 |
| 60S ribosomal protein L7a OS=Mus musculus GN=Rpl7a PE=2 SV=2 | 0 RL7A_MOUSE,sp P62424 RL7A_HUMAN,sp P62425 RL7A_RAT,sp Q2TBQ5 RL7A_BOVIN,sp Q4R5C2 RL7A_MAFCA,tr BOK021 BOK021_RAT,tr D3YVE6 D3YVE6_MOUSE,tr D3YXT4 D3YXT4_MOUSE,tr D3Z3R0 D3Z3R0_MOUSE,tr D3ZPL5 D3ZPL5_RAT,tr D3Z | IkVP<br>PAIN<br>QFT<br>QAL<br>DR | 93% | 47.6 | 51.80656 | Ref | 0.25  | -0.23 | 0.38 | 0.1   | 0.35 | -0.06 | 0.36 | 2500  | 3750  | 2930  | 5020  | 4560  | 4730  | 3710  | 4920  | 807.1 | 2418.4 | 3 | 0.0118 | 4.86 |

|                                                              |                                                                                                                                                                                                                                     |                     |     |      |          |     |       |       |      |        |      |       |      |       |       |       |       |       |       |       |       |       |        |   |        |       |
|--------------------------------------------------------------|-------------------------------------------------------------------------------------------------------------------------------------------------------------------------------------------------------------------------------------|---------------------|-----|------|----------|-----|-------|-------|------|--------|------|-------|------|-------|-------|-------|-------|-------|-------|-------|-------|-------|--------|---|--------|-------|
| 60S ribosomal protein L7a OS=Mus musculus GN=Rpl7a PE=2 SV=2 | 0 RL7A_MOUSE,sp P62424 RL7A_HUMAN,sp P62425 RL7A_RAT,sp Q2TBQ5 RL7A_BOVIN,sp Q4R5C2 RL7A_MAFCA,tr BOK021 BOK021_RAT,trans D3YVE6 D3YVE6_MOUSE,trans D3YXT4 D3YXT4_MOUSE,trans D3Z3R0 D3Z3R0_MOUSE,trans D3ZPL5 D3ZPL5_RAT,trans D3Z | nFGI<br>GQD<br>IQPK | 95% | 58.3 | 53.11195 | Ref | 0.23  | -0.33 | 0.34 | -0.073 | 0.41 | -0.2  | 0.27 | 24600 | 24500 | 17900 | 32100 | 26600 | 32500 | 22200 | 30600 | 913   | 1824   | 2 | 0.0161 | 8.815 |
| 60S ribosomal protein L7a OS=Mus musculus GN=Rpl7a PE=2 SV=2 | 0 RL7A_MOUSE,sp P62424 RL7A_HUMAN,sp P62425 RL7A_RAT,sp Q2TBQ5 RL7A_BOVIN,sp Q4R5C2 RL7A_MAFCA,tr BOK021 BOK021_RAT,trans D3YVE6 D3YVE6_MOUSE,trans D3YXT4 D3YXT4_MOUSE,trans D3Z3R0 D3Z3R0_MOUSE,trans D3ZPL5 D3ZPL5_RAT,trans D3Z | vAPA<br>PAV<br>Vk   | 95% | 47.5 | 46.02939 | Ref | 0.055 | -0.06 | 0.2  | -0.14  | 0.55 | -0.37 | 0.4  | 59900 | 53900 | 53800 | 72400 | 63300 | 89200 | 49100 | 83300 | 487.3 | 1458.9 | 3 | 0.0136 | 9.319 |

|                                                              |                                                                                                                                                                                                                                                 |                   |     |      |          |     |       |       |      |       |      |       |      |       |       |       |       |       |       |       |       |       |        |   |        |       |
|--------------------------------------------------------------|-------------------------------------------------------------------------------------------------------------------------------------------------------------------------------------------------------------------------------------------------|-------------------|-----|------|----------|-----|-------|-------|------|-------|------|-------|------|-------|-------|-------|-------|-------|-------|-------|-------|-------|--------|---|--------|-------|
| 60S ribosomal protein L7a OS=Mus musculus GN=Rpl7a PE=2 SV=2 | 0 RL7A_MOUSE,sp P62424 RL7A_HUMAN,sp P62425 RL7A_RAT,sp Q2TBQ5 RL7A_BOVIN,sp Q4R5C2 RL7A_MAFCA,tr BOK021 BOK021_RAT,trans D3YVE6 D3YVE6_MOUSE,trans D3YXT4 D3YXT4_MOUSE,trans D3Z3R0 D3Z3R0_MOUSE,trans D3ZPL5 D3ZPL5_RAT,trans D3ZAT,trans D3Z | VAPA<br>PAV<br>Vk | 61% | 28.3 | 47.43478 | Ref | 0.1   | -0.01 | 0.24 | 0.002 | 0.46 | -0.18 | 0.16 | 10800 | 10200 | 10200 | 13600 | 12700 | 15300 | 10200 | 12800 | 730.5 | 1458.9 | 2 | 0.0274 | 18.79 |
| 60S ribosomal protein L7a OS=Mus musculus GN=Rpl7a PE=2 SV=2 | 0 RL7A_MOUSE,sp P62424 RL7A_HUMAN,sp P62425 RL7A_RAT,sp Q2TBQ5 RL7A_BOVIN,sp Q4R5C2 RL7A_MAFCA,tr BOK021 BOK021_RAT,trans D3YVE6 D3YVE6_MOUSE,trans D3YXT4 D3YXT4_MOUSE,trans D3Z3R0 D3Z3R0_MOUSE,trans D3ZPL5 D3ZPL5_RAT,trans D3ZAT,trans D3Z | VAPA<br>PAV<br>Vk | 82% | 34.6 | 47.35471 | Ref | 0.033 | -0.18 | -0   | -0.16 | 0.4  | -0.22 | 0.71 | 15100 | 13400 | 12500 | 15900 | 15700 | 20300 | 13800 | 26000 | 487.3 | 1458.9 | 3 | 0.0256 | 17.54 |

|                                                              |                                                                                                                                                                                             |             |     |      |          |     |       |       |       |       |      |       |       |       |       |       |       |       |       |       |       |       |        |   |        |       |
|--------------------------------------------------------------|---------------------------------------------------------------------------------------------------------------------------------------------------------------------------------------------|-------------|-----|------|----------|-----|-------|-------|-------|-------|------|-------|-------|-------|-------|-------|-------|-------|-------|-------|-------|-------|--------|---|--------|-------|
| Elongation factor 1-beta OS=Homo sapiens GN=EEF1B2 PE=1 SV=3 | sp P24534 EF1B_HUMAN,sp P34826 EF1B_RABIT,sp Q5E983 EF1B_BOVIN,tron D2HEP4 D2HEP4_AILME,tron E2ROV2 E2ROV2_CANFA,tron F1SHD6 F1SHD6_PIG,tron F6QN95 F6QN95_MACMU,tron F7GY27 F7GY27_CALJAVR | IEEc        | 77% | 34   | 48.70573 | Ref | -0.29 | -0.3  | 0.22  | -0.43 | 0.43 | -0.75 | -0.23 | 3500  | 2830  | 3060  | 4910  | 3450  | 5490  | 2520  | 3600  | 366.9 | 1097.5 | 3 | 0.004  | 3.617 |
| Elongation factor 1-beta OS=Homo sapiens GN=EEF1B2 PE=1 SV=3 | sp P24534 EF1B_HUMAN,sp P34826 EF1B_RABIT,sp Q5E983 EF1B_BOVIN,tron D2HEP4 D2HEP4_AILME,tron E2ROV2 E2ROV2_CANFA,tron F1SHD6 F1SHD6_PIG,tron F6QN95 F6QN95_MACMU,tron F7GY27 F7GY27_CALJAVK | IVPV<br>GYI | 90% | 38.1 | 48.27757 | Ref | -0.57 | -0.29 | -0.01 | -0.1  | 0.12 | -0.53 | -0.04 | 43400 | 24700 | 32500 | 44300 | 45700 | 46600 | 31000 | 43400 | 777.5 | 1553   | 2 | 0.0128 | 8.231 |

|                                                              |                                                                                                                                                                                            |                           |     |      |          |     |       |       |       |       |      |       |       |       |       |       |       |       |       |       |       |       |        |   |        |       |
|--------------------------------------------------------------|--------------------------------------------------------------------------------------------------------------------------------------------------------------------------------------------|---------------------------|-----|------|----------|-----|-------|-------|-------|-------|------|-------|-------|-------|-------|-------|-------|-------|-------|-------|-------|-------|--------|---|--------|-------|
| Elongation factor 1-beta OS=Homo sapiens GN=EEF1B2 PE=1 SV=3 | sp P24534 EF1B_HUMAN,sp P34826 EF1B_RABIT,sp Q5E983 EF1B_BOVIN,tron D2HEP4 D2HEP4_AILME,tron E2ROV2 E2ROV2_CANFA,tron F1SHD6 F1SHD6_PIG,tron F6QN95 F6QN95_MACM U,tron F7GY27 F7GY27_CALIA | SIQA<br>DGL<br>VWG<br>SSk | 93% | 49.5 | 53.67641 | Ref | -0.49 | -0.26 | 3E-04 | -0.04 | 0.1  | -0.53 | 0.008 | 43800 | 29400 | 37500 | 50400 | 54000 | 52000 | 35100 | 50500 | 652.7 | 1955.1 | 3 | 0.0206 | 10.52 |
| Elongation factor 1-beta OS=Homo sapiens GN=EEF1B2 PE=1 SV=3 | sp P24534 EF1B_HUMAN,sp P34826 EF1B_RABIT,sp Q5E983 EF1B_BOVIN,tron D2HEP4 D2HEP4_AILME,tron E2ROV2 E2ROV2_CANFA,tron F1SHD6 F1SHD6_PIG,tron F6QN95 F6QN95_MACM U,tron F7GY27 F7GY27_CALIA | SIQA<br>DGL<br>VWG<br>SSk | 95% | 55.3 | 53.64356 | Ref | -0.29 | -0.24 | -0.05 | -0.25 | 0.12 | -0.45 | -0.21 | 9720  | 6570  | 7340  | 9450  | 9030  | 10200 | 7200  | 8430  | 978.5 | 1955.1 | 2 | 0.0176 | 8.974 |

|                                                              |                                                                                                                                                                                            |                    |     |      |          |     |       |       |       |       |       |       |       |       |       |       |       |       |       |       |       |       |        |   |        |       |
|--------------------------------------------------------------|--------------------------------------------------------------------------------------------------------------------------------------------------------------------------------------------|--------------------|-----|------|----------|-----|-------|-------|-------|-------|-------|-------|-------|-------|-------|-------|-------|-------|-------|-------|-------|-------|--------|---|--------|-------|
| Elongation factor 1-beta OS=Homo sapiens GN=EEF1B2 PE=1 SV=3 | sp P24534 EF1B_HUMAN,sp P34826 EF1B_RABIT,sp Q5E983 EF1B_BOVIN,tron D2HEP4 D2HEP4_AILME,tron E2ROV2 E2ROV2_CANFA,tron F1SHD6 F1SHD6_PIG,tron F6QN95 F6QN95_MACM U,tron F7GY27 F7GY27_CALIA | sPAG LQVL NDYL ADK | 91% | 47.8 | 54.20083 | Ref | -0.37 | -0.21 | -0.16 | -0.13 | 0.033 | -0.59 | 0.1   | 33100 | 22200 | 26900 | 31400 | 35400 | 34500 | 23400 | 37500 | 738.1 | 2211.2 | 3 | 0.0366 | 16.55 |
| Elongation factor 1-beta OS=Homo sapiens GN=EEF1B2 PE=1 SV=3 | sp P24534 EF1B_HUMAN,sp P34826 EF1B_RABIT,sp Q5E983 EF1B_BOVIN,tron D2HEP4 D2HEP4_AILME,tron E2ROV2 E2ROV2_CANFA,tron F1SHD6 F1SHD6_PIG,tron F6QN95 F6QN95_MACM U,tron F7GY27 F7GY27_CALIA | sPAG LQVL NDYL ADK | 67% | 36.4 | 53.8055  | Ref | 0.046 | -0.36 | -0.31 | -0.35 | 0.029 | -0.23 | 0.031 | 461   | 457   | 375   | 436   | 467   | 529   | 462   | 549   | 738.1 | 2211.2 | 3 | 0.0066 | 2.976 |

|                                                                                                 |                                                                                                                                                                                       |                |      |     |      |          |     |        |       |       |       |       |       |       |       |       |       |       |       |       |       |       |       |        |   |        |       |
|-------------------------------------------------------------------------------------------------|---------------------------------------------------------------------------------------------------------------------------------------------------------------------------------------|----------------|------|-----|------|----------|-----|--------|-------|-------|-------|-------|-------|-------|-------|-------|-------|-------|-------|-------|-------|-------|-------|--------|---|--------|-------|
| Elongation factor 1-beta OS=Homo sapiens GN=EEF1B2 PE=1 SV=3                                    | sp P24534 EF1B_HUMAN,sp P34826 EF1B_RABIT,sp Q5E983 EF1B_BOVIN,tri D2HEP4 D2HEP4_AILME,tri E2ROV2 E2ROV2_CANFA,tri F1SHD6 F1SHD6_PIG,tri F6QN95 F6QN95_MACM U,tri F7GY27 F7GY27_CALIA | sPAG LQVL nDYL | ADK  | 87% | 43.8 | 54.33444 | Ref | -0.095 | -0.36 | -0.11 | -0.24 | 0.008 | -0.32 | -0.13 | 8120  | 6610  | 5970  | 7940  | 8020  | 8310  | 6910  | 7830  | 738.4 | 2212.2 | 3 | 0.0261 | 11.8  |
| Putative uncharacterized protein (Fragment) OS=Ailuropoda melanoleuca GN=PANDA_016835 PE=3 SV=1 | tr D2HWI4 D2HWI4_AILME                                                                                                                                                                | aTGP PVSE LITK | LITK | 89% | 43.2 | 51.60775 | Ref | -0.84  | 0.37  | -1.3  | -0.42 | -0.72 | -0.16 | -0.8  | 19700 | 9700  | 24300 | 8700  | 17400 | 12300 | 19000 | 12100 | 607.7 | 1820.1 | 3 | 0.0235 | 12.93 |
| Putative uncharacterized protein (Fragment) OS=Ailuropoda melanoleuca GN=PANDA_016835 PE=3 SV=1 | tr D2HWI4 D2HWI4_AILME                                                                                                                                                                | aTGP PVSE LITK | LITK | 95% | 50.1 | 51.36445 | Ref | -1.2   | 0.46  | -1.9  | -0.23 | -0.66 | -0.21 | -0.79 | 63900 | 24200 | 80600 | 18000 | 61500 | 39900 | 57100 | 37800 | 607.7 | 1820.1 | 3 | 0.0173 | 9.52  |



|                                                                                                          |                                |                       |     |      |          |     |       |       |      |       |       |       |       |       |      |       |      |       |       |       |       |       |        |   |        |       |
|----------------------------------------------------------------------------------------------------------|--------------------------------|-----------------------|-----|------|----------|-----|-------|-------|------|-------|-------|-------|-------|-------|------|-------|------|-------|-------|-------|-------|-------|--------|---|--------|-------|
| Putative uncharacterized protein (Fragment)<br>OS=Ailuropoda melanoleuca<br>GN=PANDA_016835<br>PE=3 SV=1 | tr D2HWI<br>4 D2HWI<br>4_AILME | kATG<br>PPVS<br>ELITk | 94% | 47.6 | 49.49073 | Ref | -1.2  | 0.22  | -1.5 | -0.11 | -0.59 | -0.14 | -0.46 | 18900 | 8020 | 23600 | 8170 | 23300 | 14600 | 20800 | 16500 | 751.8 | 2252.4 | 3 | 0.0352 | 15.63 |
| Putative uncharacterized protein (Fragment)<br>OS=Ailuropoda melanoleuca<br>GN=PANDA_016835<br>PE=3 SV=1 | tr D2HWI<br>4 D2HWI<br>4_AILME | kATG<br>PPVS<br>ELITk | 72% | 31.1 | 49.37939 | Ref | -0.92 | 0.098 | -1.1 | -0.28 | -0.74 | -0.15 | -0.59 | 15900 | 7290 | 16100 | 8070 | 15300 | 9730  | 15200 | 11200 | 564.1 | 2252.4 | 4 | 0.0336 | 14.91 |
| Putative uncharacterized protein (Fragment)<br>OS=Ailuropoda melanoleuca<br>GN=PANDA_016835<br>PE=3 SV=1 | tr D2HWI<br>4 D2HWI<br>4_AILME | kATG<br>PPVS<br>ELITk | 68% | 29.7 | 46.86189 | Ref | -1.1  | 0.25  | -1.2 | -0.4  | -0.6  | -0.23 | -0.22 | 10300 | 5160 | 13900 | 5860 | 11000 | 8370  | 11300 | 11300 | 751.8 | 2252.4 | 3 | 0.0032 | 1.442 |

|                                                                                                          |                        |                                  |     |      |          |     |       |      |                            |       |       |       |       |       |      |       |                            |       |       |       |       |       |        |   |        |       |
|----------------------------------------------------------------------------------------------------------|------------------------|----------------------------------|-----|------|----------|-----|-------|------|----------------------------|-------|-------|-------|-------|-------|------|-------|----------------------------|-------|-------|-------|-------|-------|--------|---|--------|-------|
| Putative uncharacterized protein (Fragment)<br>OS=Ailuropoda melanoleuca<br>GN=PANDA_016835<br>PE=3 SV=1 | tr D2HWI4 D2HWI4_AILME | nGLS<br>LAAL<br>k                | 90% | 43.6 | 51.02986 | Ref | -1.4  | 0.51 | -1.8                       | -0.48 | -0.69 | -0.19 | -0.72 | 18100 | 5260 | 21300 | 4930                       | 13300 | 10000 | 14800 | 10100 | 499.3 | 1494.9 | 3 | 0.0236 | 15.78 |
| Putative uncharacterized protein (Fragment)<br>OS=Ailuropoda melanoleuca<br>GN=PANDA_016835<br>PE=3 SV=1 | tr D2HWI4 D2HWI4_AILME | sETA<br>PAET<br>AAP<br>APVE<br>k | 61% | 34.1 | 53.16061 | Ref | -0.77 | 0.22 | Value Missing (-2.5630846) | -0.24 | -0.7  | -0.04 | -0.59 | 259   | 127  | 274   | Value Missing (-2.5630846) | 246   | 156   | 258   | 175   | 958   | 1914   | 2 | 0.0152 | 7.956 |
| Clusterin OS=Bos taurus GN=CLU<br>PE=1 SV=1                                                              | sp P17697 CLUS_BOVIN   | aSSI<br>MDE<br>LFQ<br>DR         | 95% | 49.3 | 51.57596 | Ref | 0.17  | 0.47 | 0.12                       | 0.31  | -0.04 | 0.51  | 0.25  | 876   | 974  | 1300  | 1140                       | 1440  | 985   | 1510  | 1250  | 858.4 | 1714.8 | 2 | 0.0111 | 6.461 |
| Clusterin OS=Bos taurus GN=CLU<br>PE=1 SV=1                                                              | sp P17697 CLUS_BOVIN   | kLLLS<br>SLEE<br>Ak              | 76% | 31.5 | 48.52327 | Ref | 0.035 | 0.44 | 0.2                        | 0.32  | 0.087 | 0.45  | 0.09  | 2620  | 2260 | 3250  | 3090                       | 3690  | 2740  | 3690  | 2850  | 536.6 | 2142.3 | 4 | 0.0326 | 15.22 |
| Clusterin OS=Bos taurus GN=CLU<br>PE=1 SV=1                                                              | sp P17697 CLUS_BOVIN   | kLLLS<br>SLEE<br>Ak              | 93% | 42.7 | 46.44586 | Ref | 0.045 | 0.41 | 0.25                       | 0.23  | 0.077 | 0.55  | 0.15  | 2670  | 2490 | 3470  | 3490                       | 3800  | 2980  | 4330  | 3260  | 715.1 | 2142.3 | 3 | 0.0082 | 3.833 |
| Clusterin OS=Bos taurus GN=CLU<br>PE=1 SV=1                                                              | sp P17697 CLUS_BOVIN   | kLLLS<br>SLEE<br>Ak              | 93% | 44.1 | 48.45923 | Ref | 0.28  | 0.19 | 0.14                       | 0.28  | 0.21  | 0.47  | 0.17  | 1580  | 1720 | 1750  | 1910                       | 2310  | 1920  | 2400  | 1940  | 715.1 | 2142.3 | 3 | 0.0307 | 14.34 |

|                                                                           |                                      |                                  |     |      |          |     |       |       |       |        |       |       |       |      |      |      |      |      |      |      |      |       |        |   |        |       |
|---------------------------------------------------------------------------|--------------------------------------|----------------------------------|-----|------|----------|-----|-------|-------|-------|--------|-------|-------|-------|------|------|------|------|------|------|------|------|-------|--------|---|--------|-------|
| Clusterin OS=Bos taurus GN=CLU PE=1 SV=1                                  | sp P17697 CLUS_BOVIN                 | rPQD<br>TQYY<br>SPFS<br>SFPR     | 63% | 34.7 | 53.09272 | Ref | 0.38  | 0.29  | 0.079 | 0.21   | 0.2   | 0.21  | 0.34  | 3380 | 3820 | 3890 | 3780 | 4560 | 3960 | 4160 | 4510 | 760.7 | 2279.1 | 3 | 0.0149 | 6.55  |
| Clusterin OS=Bos taurus GN=CLU PE=1 SV=1                                  | sp P17697 CLUS_BOVIN                 | rPQD<br>TQYY<br>SPFS<br>SFPR     | 63% | 34.7 | 53.12523 | Ref | 0.23  | 0.5   | 0.11  | 0.22   | 0.16  | 0.25  | 0.22  | 2010 | 2010 | 2630 | 2250 | 2680 | 2250 | 2490 | 2420 | 760.7 | 2279.1 | 3 | 0.014  | 6.156 |
| Clusterin OS=Bos taurus GN=CLU PE=1 SV=1                                  | sp P17697 CLUS_BOVIN                 | tPyH<br>FPT<br>MEF<br>TEnN<br>DR | 74% | 34.9 | 52.63875 | Ref | 0.16  | 0.25  | 0.2   | 0.15   | 0.15  | 0.35  | 0.41  | 3430 | 3180 | 3680 | 3990 | 4250 | 3720 | 4460 | 4610 | 652.8 | 2607.2 | 4 | 0.0255 | 9.776 |
| Interferon-induced GTP-binding protein Mx1 OS=Ovis aries GN=MX1 PE=2 SV=1 | sp P33237 MX1_SHEEP, tr A0SVJ0_SHEEP | ITNE<br>LIMH<br>Lck              | 75% | 38.2 | 53.7353  | Ref | -0.49 | -1.1  | 0.15  | -0.048 | -0.45 | -0.88 | 0.089 | 940  | 582  | 403  | 1100 | 1060 | 701  | 544  | 1060 | 657   | 1968.1 | 3 | 0.0032 | 1.606 |
| Interferon-induced GTP-binding protein Mx1 OS=Ovis aries GN=MX1 PE=2 SV=1 | sp P33237 MX1_SHEEP, tr A0SVJ0_SHEEP | sSVL<br>EALS<br>GVA<br>LPR       | 52% | 31.4 | 52.00837 | Ref | -0.72 | -1.2  | 0.12  | -0.15  | 0.2   | -1.1  | 0.092 | 2950 | 1770 | 1390 | 3870 | 3550 | 3930 | 1640 | 3790 | 852   | 1702   | 2 | 0.007  | 4.139 |
| Interferon-induced GTP-binding protein Mx1 OS=Ovis aries GN=MX1 PE=2 SV=1 | sp P33237 MX1_SHEEP, tr A0SVJ0_SHEEP | sSVL<br>EALS<br>GVA<br>LPR       | 95% | 57.7 | 52.16469 | Ref | -0.26 | -0.31 | -0.23 | -0.22  | -0.39 | -0.3  | -0.29 | 953  | 827  | 864  | 1030 | 1140 | 887  | 987  | 982  | 568.3 | 1702   | 3 | 0.01   | 5.874 |

|                                                                                    |                                                            |                       |     |      |          |     |       |       |       |       |       |                                       |       |     |     |     |      |     |                                       |     |     |     |      |   |        |       |
|------------------------------------------------------------------------------------|------------------------------------------------------------|-----------------------|-----|------|----------|-----|-------|-------|-------|-------|-------|---------------------------------------|-------|-----|-----|-----|------|-----|---------------------------------------|-----|-----|-----|------|---|--------|-------|
| Interferon-induced<br>GTP-binding protein<br>Mx1 OS=Ovis aries<br>GN=MX1 PE=2 SV=1 | sp P33237 MX1_S<br>HEEP,tr A<br>OSVJO A0<br>SVJO_SHE<br>EP | VRPc<br>IDLI<br>DSLRL | 95% | 56   | 53.41124 | Ref | -1.1  | -1.3  | 0.38  | -0.28 | 0.27  | Value<br>Missing (-<br>3.466<br>4001) | 0.08  | 753 | 254 | 231 | 841  | 587 | Value<br>Missing (-<br>3.4664<br>001) | 755 | 684 | 584 | 1749 | 3 | 0.0039 | 2.256 |
| Interferon-induced<br>GTP-binding protein<br>Mx1 OS=Ovis aries<br>GN=MX1 PE=2 SV=1 | sp P33237 MX1_S<br>HEEP,tr A<br>OSVJO A0<br>SVJO_SHE<br>EP | VRPc<br>IDLI<br>DSLRL | 76% | 38.2 | 53.35233 | Ref | -1    | -1.5  | 0.089 | -0.16 | -0.02 | -0.8                                  | 0.009 | 592 | 204 | 162 | 548  | 509 | 489                                   | 297 | 517 | 584 | 1749 | 3 | #####  | 0.267 |
| Interferon-induced<br>GTP-binding protein<br>Mx1 OS=Ovis aries<br>GN=MX1 PE=2 SV=1 | sp P33237 MX1_S<br>HEEP,tr A<br>OSVJO A0<br>SVJO_SHE<br>EP | VRPc<br>IDLI<br>DSLRL | 54% | 33.5 | 53.44331 | Ref | -0.72 | -0.86 | -0.14 | -0.23 | 0.009 | -0.99                                 | -0.05 | 856 | 381 | 373 | 692  | 717 | 739                                   | 385 | 736 | 584 | 1749 | 3 | 0.0085 | 4.879 |
| Interferon-induced<br>GTP-binding protein<br>Mx1 OS=Ovis aries<br>GN=MX1 PE=2 SV=1 | sp P33237 MX1_S<br>HEEP,tr A<br>OSVJO A0<br>SVJO_SHE<br>EP | VRPc<br>IDLI<br>DSLRL | 95% | 54.9 | 53.41124 | Ref | -1.2  | -0.77 | 0.21  | -0.13 | 0.19  | -1.5                                  | 0.092 | 751 | 324 | 460 | 1020 | 885 | 964                                   | 315 | 933 | 584 | 1749 | 3 | 0.0039 | 2.256 |

|                                                |                                                                  |                                  |     |      |          |     |        |       |       |        |       |       |       |      |      |      |       |       |       |       |       |       |      |   |        |       |
|------------------------------------------------|------------------------------------------------------------------|----------------------------------|-----|------|----------|-----|--------|-------|-------|--------|-------|-------|-------|------|------|------|-------|-------|-------|-------|-------|-------|------|---|--------|-------|
| Calnexin OS=Canis familiaris GN=CANX PE=1 SV=3 | sp P24643 CALX_CANFA,tr D2HGC1 D2HGC1_AILME,tr F1S441 F1S441_PIG | aPVP<br>TGE<br>VYFA<br>DSF<br>DR | 58% | 33.3 | 52.55627 | Ref | 0.38   | -0.02 | 0.01  | -0.13  | -0    | -0.35 | 0.078 | 6630 | 8010 | 6610 | 7570  | 7590  | 7230  | 5940  | 7910  | 692.3 | 2074 | 3 | 0.0157 | 7.578 |
| Calnexin OS=Canis familiaris GN=CANX PE=1 SV=3 | sp P24643 CALX_CANFA,tr D2HGC1 D2HGC1_AILME,tr F1S441 F1S441_PIG | aPVP<br>TGE<br>VYFA<br>DSF<br>DR | 95% | 74.5 | 52.60081 | Ref | 0.1    | -0.11 | 0.055 | -0.094 | 0.37  | -0.61 | 0.007 | 9020 | 7970 | 7480 | 9390  | 9330  | 11300 | 5950  | 9060  | 1038  | 2074 | 2 | 0.0144 | 6.929 |
| Calnexin OS=Canis familiaris GN=CANX PE=1 SV=3 | sp P24643 CALX_CANFA,tr D2HGC1 D2HGC1_AILME,tr F1S441 F1S441_PIG | aPVP<br>TGE<br>VYFA<br>DSF<br>DR | 95% | 66   | 52.60946 | Ref | 0.084  | 0.044 | 0.15  | -0.13  | 0.23  | -0.39 | 0.08  | 3830 | 4030 | 4260 | 5160  | 4670  | 5230  | 3560  | 4890  | 1038  | 2074 | 2 | 0.0132 | 6.341 |
| Calnexin OS=Canis familiaris GN=CANX PE=1 SV=3 | sp P24643 CALX_CANFA,tr D2HGC1 D2HGC1_AILME,tr F1S441 F1S441_PIG | aPVP<br>TGE<br>VYFA<br>DSF<br>DR | 68% | 35.4 | 52.70262 | Ref | 0.16   | -0    | 0.021 | -0.12  | 0.048 | -0.03 | -0.11 | 5580 | 5410 | 5260 | 5990  | 5980  | 5870  | 5800  | 5470  | 692.3 | 2074 | 3 | 0.0113 | 5.467 |
| Calnexin OS=Canis familiaris GN=CANX PE=1 SV=3 | sp P24643 CALX_CANFA,tr D2HGC1 D2HGC1_AILME,tr F1S441 F1S441_PIG | gTLS<br>GWI<br>Lsk               | 92% | 46.6 | 51.73058 | Ref | -0.082 | -0.19 | 0.13  | -0.11  | 0.22  | 0.02  | 0.041 | 9620 | 8370 | 8420 | 11800 | 11000 | 12100 | 11000 | 11100 | 557.3 | 1669 | 3 | 0.0289 | 17.31 |
| Calnexin OS=Canis familiaris GN=CANX PE=1 SV=3 | sp P24643 CALX_CANFA,tr D2HGC1 D2HGC1_AILME,tr F1S441 F1S441_PIG | gTLS<br>GWI<br>Lsk               | 95% | 53.6 | 51.21373 | Ref | -0.13  | -0.19 | 0.28  | -0.19  | 0.33  | -0.48 | 0.13  | 4120 | 3160 | 3310 | 5150  | 4070  | 5120  | 3050  | 4610  | 835.5 | 1669 | 2 | 0.0168 | 10.08 |

|                                                                          |                                                                  |                             |     |      |          |     |        |       |       |        |       |       |       |       |       |       |       |       |       |       |       |       |        |   |        |       |
|--------------------------------------------------------------------------|------------------------------------------------------------------|-----------------------------|-----|------|----------|-----|--------|-------|-------|--------|-------|-------|-------|-------|-------|-------|-------|-------|-------|-------|-------|-------|--------|---|--------|-------|
| Calnexin OS=Canis familiaris GN=CANX PE=1 SV=3                           | sp P24643 CALX_CANFA,tr D2HGC1 D2HGC1_AILME,tr F1S441 F1S441_PIG | kIPN<br>PDFF<br>EDLE<br>PFk | 74% | 36.7 | 54.28645 | Ref | -0.007 | -0.25 | 0.098 | -0.13  | 0.12  | -0.2  | 0.25  | 4070  | 3470  | 3190  | 4540  | 4280  | 4450  | 3720  | 5020  | 687.9 | 2747.5 | 4 | 0.0128 | 4.662 |
| Translationally-controlled tumor protein OS=Bos taurus GN=TPT1 PE=2 SV=1 | sp Q5E984 TCTP_BOVIN,tr A5JST3 A5JST3_CAPHI                      | dLIS<br>HDE<br>MFS<br>DIYk  | 74% | 38.5 | 54.30207 | Ref | -0.035 | -0.23 | 0.24  | -0.012 | 0.22  | -0.38 | 0.14  | 16900 | 13800 | 13000 | 20300 | 18800 | 19200 | 13300 | 18900 | 774.4 | 2320.2 | 3 | 0.0124 | 5.327 |
| Translationally-controlled tumor protein OS=Bos taurus GN=TPT1 PE=2 SV=1 | sp Q5E984 TCTP_BOVIN,tr A5JST3 A5JST3_CAPHI                      | eVA<br>DGLc<br>LEVE<br>Gk   | 95% | 63.8 | 53.79395 | Ref | 0.03   | -0.21 | 0.25  | -0.024 | 0.14  | -0.46 | 0.24  | 7020  | 6140  | 5630  | 8720  | 7940  | 7760  | 5370  | 8620  | 1009  | 2015   | 2 | 0.0128 | 6.35  |
| Translationally-controlled tumor protein OS=Bos taurus GN=TPT1 PE=2 SV=1 | sp Q5E984 TCTP_BOVIN,tr A5JST3 A5JST3_CAPHI                      | eVA<br>DGLc<br>LEVE<br>Gk   | 93% | 50.3 | 53.8183  | Ref | 0.16   | -0.2  | 0.3   | -0.22  | 0.19  | -0.36 | 0.13  | 30800 | 30600 | 25900 | 41100 | 31500 | 36700 | 26100 | 36400 | 672.7 | 2015   | 3 | 0.0041 | 2.048 |
| Translationally-controlled tumor protein OS=Bos taurus GN=TPT1 PE=2 SV=1 | sp Q5E984 TCTP_BOVIN,tr A5JST3 A5JST3_CAPHI                      | eVA<br>DGLc<br>LEVE<br>Gk   | 87% | 43.7 | 53.88978 | Ref | 0.046  | -0.09 | 0.3   | -0.045 | 0.042 | -0.12 | -0.07 | 2170  | 1940  | 1920  | 2820  | 2440  | 2270  | 2120  | 2170  | 672.7 | 2015   | 3 | 0.0038 | 1.869 |

|                                                                          |                                              |               |     |      |          |     |      |       |       |        |       |       |       |       |       |      |       |       |       |      |       |       |        |   |        |       |
|--------------------------------------------------------------------------|----------------------------------------------|---------------|-----|------|----------|-----|------|-------|-------|--------|-------|-------|-------|-------|-------|------|-------|-------|-------|------|-------|-------|--------|---|--------|-------|
| Translationally-controlled tumor protein OS=Bos taurus GN=TPT1 PE=2 SV=1 | sp Q5E984 TCTP_BOVIN, tr A5JST3 A5JST3_CAPHI | eVADGLcLEVEGk | 91% | 46.8 | 53.69145 | Ref | 0.16 | -0.1  | 0.12  | -0.008 | 0.11  | -0.16 | 0.006 | 2660  | 2650  | 2400 | 3140  | 3170  | 2990  | 2600 | 2890  | 672.7 | 2015   | 3 | 0.016  | 7.955 |
| Translationally-controlled tumor protein OS=Bos taurus GN=TPT1 PE=2 SV=1 | sp Q5E984 TCTP_BOVIN, tr A5JST3 A5JST3_CAPHI | eVADGLcLEVEGk | 72% | 37.6 | 53.80915 | Ref | 0.31 | 0.053 | 0.063 | -0.19  | 0.084 | -0.1  | -0.13 | 365   | 404   | 367  | 415   | 385   | 405   | 372  | 363   | 672.7 | 2015   | 3 | 0.0089 | 4.414 |
| Translationally-controlled tumor protein OS=Bos taurus GN=TPT1 PE=2 SV=1 | sp Q5E984 TCTP_BOVIN, tr A5JST3 A5JST3_CAPHI | hILANFk       | 53% | 29   | 49.15247 | Ref | 0.18 | -0.16 | 0.058 | -0.19  | 0.23  | -0.15 | 0.097 | 10300 | 10100 | 8670 | 11300 | 10500 | 12300 | 9830 | 11600 | 484.3 | 1449.9 | 3 | 0.0013 | 0.892 |

|                                                                       |                                                                                                                                                                                                                                                                                                                                   |                   |     |      |          |     |       |       |       |        |      |       |      |      |      |      |      |      |      |      |      |       |      |   |        |       |
|-----------------------------------------------------------------------|-----------------------------------------------------------------------------------------------------------------------------------------------------------------------------------------------------------------------------------------------------------------------------------------------------------------------------------|-------------------|-----|------|----------|-----|-------|-------|-------|--------|------|-------|------|------|------|------|------|------|------|------|------|-------|------|---|--------|-------|
| 40S ribosomal protein S25<br>OS=Homo sapiens<br>GN=RPS25 PE=1<br>SV=1 | 1 RS25_H<br>UMAN,sp<br> P62852 <br>RS25_MO<br>USE,sp P6<br>2853 RS2<br>5_RAT,sp<br> Q56JX5 <br>RS25_BO<br>VIN,sp Q<br>6Q311 RS<br>25_SHEEP<br>,tr BOVXX<br>0 BOVXK0<br>_CALJA,tr<br> C6ZIA4 <br>C6ZIA4_AI<br>LME,tr D<br>2I334 D2I<br>334_AILM<br>E,tr D3Z<br>WX8 D3Z<br>WX8_RAT<br>,tr E2RS4<br>9 E2RS49<br>_CANFA,tr<br> F1M6F4 | aALQ<br>ELLS<br>k | 67% | 33.3 | 50.70337 | Ref | -0.45 | -0.02 | 0.1   | -0.094 | 0.24 | -0.05 | 0.35 | 4230 | 2110 | 3080 | 3760 | 3630 | 3990 | 3400 | 4460 | 527.7 | 1580 | 3 | 0.0225 | 14.23 |
| 40S ribosomal protein S25<br>OS=Homo sapiens<br>GN=RPS25 PE=1<br>SV=1 | 1 RS25_H<br>UMAN,sp<br> P62852 <br>RS25_MO<br>USE,sp P6<br>2853 RS2<br>5_RAT,sp<br> Q56JX5 <br>RS25_BO<br>VIN,sp Q<br>6Q311 RS<br>25_SHEEP<br>,tr BOVXX<br>0 BOVXK0<br>_CALJA,tr<br> C6ZIA4 <br>C6ZIA4_AI<br>LME,tr D<br>2I334 D2I<br>334_AILM<br>E,tr D3Z<br>WX8 D3Z<br>WX8_RAT<br>,tr E2RS4<br>9 E2RS49<br>_CANFA,tr<br> F1M6F4 | aALQ<br>ELLS<br>k | 95% | 50   | 49.9456  | Ref | -0.63 | 0.16  | -0.05 | 0.22   | 0.35 | 0.039 | 0.57 | 3550 | 2750 | 5160 | 4990 | 6660 | 6360 | 5340 | 7680 | 791   | 1580 | 2 | 0.0078 | 4.931 |



|                                                                       |                                                                                                                                                                                                                           |                         |     |      |          |     |                        |                        |                          |                        |                          |                         |                          |                        |                           |                        |                        |                          |                         |       |        |   |        |       |
|-----------------------------------------------------------------------|---------------------------------------------------------------------------------------------------------------------------------------------------------------------------------------------------------------------------|-------------------------|-----|------|----------|-----|------------------------|------------------------|--------------------------|------------------------|--------------------------|-------------------------|--------------------------|------------------------|---------------------------|------------------------|------------------------|--------------------------|-------------------------|-------|--------|---|--------|-------|
| 40S ribosomal protein S25<br>OS=Homo sapiens<br>GN=RPS25 PE=1<br>SV=1 | 1 RS25_HUMAN,sp P62852 RS25_MOUSE,sp P62853 RS25_RAT,sp Q56JX5 RS25_BOVIN,sp Q6Q311 RS25_SHEEP,tr BOVXK0 BOVXK0_CALJA,tr C6ZIA4 C6ZIA4_AILME,tr D2I334 D2I334_AILME,tr D3ZWX8 D3ZWX8_RAT,tr E2RS49 E2RS49_CANFA,tr F1M6F4 | gGD<br>APA<br>AGE<br>DA | 64% | 27.9 | 46.39357 | Ref | No Values (0.29704753) | No Values (0.17935394) | No Values (0.0127759045) | No Values (0.06815258) | No Values (0.0053857183) | No Values (0.016259793) | No Values (0.094657353)  | No Values (0.17935394) | No Values (0.01275904594) | No Values (0.1277198)  | No Values (0.06815258) | No Values (0.0053857183) | No Values (0.016259793) | 617.8 | 1233.6 | 2 | 0.0152 | 12.34 |
| 40S ribosomal protein S25<br>OS=Homo sapiens<br>GN=RPS25 PE=1<br>SV=1 | 1 RS25_HUMAN,sp P62852 RS25_MOUSE,sp P62853 RS25_RAT,sp Q56JX5 RS25_BOVIN,sp Q6Q311 RS25_SHEEP,tr BOVXK0 BOVXK0_CALJA,tr C6ZIA4 C6ZIA4_AILME,tr D2I334 D2I334_AILME,tr D3ZWX8 D3ZWX8_RAT,tr E2RS49 E2RS49_CANFA,tr F1M6F4 | gGD<br>APA<br>AGE<br>DA | 67% | 28.6 | 46.48224 | Ref | No Values (0.29704753) | No Values (0.17935409) | No Values (0.0127759556) | No Values (0.06815274) | No Values (0.0053858897) | No Values (0.01625995)  | No Values (0.0946576253) | No Values (0.17935409) | No Values (0.01275955676) | No Values (0.12771976) | No Values (0.06815274) | No Values (0.0053858897) | No Values (0.016259965) | 617.8 | 1233.6 | 2 | 0.0135 | 10.96 |

|                                                                       |                                                                                                                                                                                                                                 |                         |     |      |          |     |                         |                          |                         |                        |                                    |                             |                                   |                         |                          |                         |                        |                                    |                             |                               |       |        |   |        |       |
|-----------------------------------------------------------------------|---------------------------------------------------------------------------------------------------------------------------------------------------------------------------------------------------------------------------------|-------------------------|-----|------|----------|-----|-------------------------|--------------------------|-------------------------|------------------------|------------------------------------|-----------------------------|-----------------------------------|-------------------------|--------------------------|-------------------------|------------------------|------------------------------------|-----------------------------|-------------------------------|-------|--------|---|--------|-------|
| 40S ribosomal protein S25<br>OS=Homo sapiens<br>GN=RPS25 PE=1<br>SV=1 | 1 RS25_HUMAN,sp P62852 RS25_MOUSE,sp P62853 RS25_RAT,sp Q56JX5 RS25_BOVIN,sp Q6Q311 RS25_SHEEP, tr BOVXK0 BOVXK0_CALJA, tr C6ZIA4 C6ZIA4_AILME, tr D2I334 D2I334_AILME, tr D3ZWX8 D3ZWX8_RAT, tr E2RS49 E2RS49_CANFA, tr F1M6F4 | gGD<br>APA<br>AGE<br>DA | 84% | 33.2 | 46.57123 | Ref | No Values (0.093217015) | No Values (-0.024476482) | No Values (-0.19107126) | No Values (-0.3315048) | Reference Missing (1.013444687635) | No Values (-0.198444687069) | No Values (-0.10917317)           | No Values (0.093217015) | No Values (-0.024476482) | No Values (-0.19107126) | No Values (-0.3315048) | Reference Missing (1.013444687635) | No Values (-0.198444687069) | No Values (-0.18757069)       | 617.8 | 1233.6 | 2 | 0.0112 | 9.079 |
| 40S ribosomal protein S25<br>OS=Homo sapiens<br>GN=RPS25 PE=1<br>SV=1 | 1 RS25_HUMAN,sp P62852 RS25_MOUSE,sp P62853 RS25_RAT,sp Q56JX5 RS25_BOVIN,sp Q6Q311 RS25_SHEEP, tr BOVXK0 BOVXK0_CALJA, tr C6ZIA4 C6ZIA4_AILME, tr D2I334 D2I334_AILME, tr D3ZWX8 D3ZWX8_RAT, tr E2RS49 E2RS49_CANFA, tr F1M6F4 | gGD<br>APA<br>AGE<br>DA | 64% | 28   | 46.51637 | Ref | No Values (-0.06509833) | No Values (-0.18279158)  | No Values (-0.34938657) | No Values (-0.4898657) | No Values (-0.2939931)             | No Values (-0.3567598)      | Reference Missing (1.40882928836) | No Values (-0.06509833) | No Values (-0.18279158)  | No Values (-0.34938657) | No Values (-0.4898657) | No Values (-0.2939931)             | No Values (-0.3567598)      | Reference Missing (1.4088292) | 617.8 | 1233.6 | 2 | 0.0139 | 11.25 |

|                                                                                   |                                                                                                                                                                                                                                  |                                |            |           |                 |            |             |              |              |               |              |              |              |               |                  |              |                |                 |              |              |                  |              |               |               |               |               |              |
|-----------------------------------------------------------------------------------|----------------------------------------------------------------------------------------------------------------------------------------------------------------------------------------------------------------------------------|--------------------------------|------------|-----------|-----------------|------------|-------------|--------------|--------------|---------------|--------------|--------------|--------------|---------------|------------------|--------------|----------------|-----------------|--------------|--------------|------------------|--------------|---------------|---------------|---------------|---------------|--------------|
| <p>40S ribosomal protein S25<br/>OS=Homo sapiens<br/>GN=RPS25 PE=1<br/>SV=1</p>   | <p>1 RS25_HUMAN,sp P62852 RS25_MOUSE,sp P62853 RS25_RAT,sp Q56JX5 RS25_BOVIN,sp Q6Q311 RS25_SHEEP,tr BOVXK0 BOVXK0_CALJA,tr C6ZIA4 C6ZIA4_ALME,tr D2I334 D2I334_AILME,tr D3ZWX8 D3ZWX8_RAT,tr E2RS49 E2RS49_CANFA,tr F1M6F4 </p> | <p>gGDA</p>                    | <p>58%</p> | <p>27</p> | <p>46.57123</p> | <p>Ref</p> | <p>4753</p> | <p>93540</p> | <p>75921</p> | <p>0.1277</p> | <p>15258</p> | <p>38588</p> | <p>25979</p> | <p>(0.094</p> | <p>(0.297047</p> | <p>93540</p> | <p>(0.0127</p> | <p>0.127719</p> | <p>81525</p> | <p>38588</p> | <p>(0.016259</p> | <p>793)</p>  | <p>617.8</p>  | <p>1233.6</p> | <p>2</p>      | <p>0.0108</p> | <p>8.788</p> |
| <p>60S acidic ribosomal protein P0<br/>OS=Homo sapiens GN=RPLP0<br/>PE=1 SV=1</p> | <p>8 RLA0_HUMAN,sp P14869 RLA0_MOUSE,sp P19945 RLA0_RAT,sp Q29214 RLA0_PIG,sp Q95140 RLA0_BOVIN,tr A7E336 A7E336_BOVIN,tr A8K424 A8K424_HUMAN,tr D2I459 D2I459_AILME,tr F1M2B8 F1M2B8_RAT,tr F1MDN4 F1MDN4_BOVIN,tr F1P720 </p>  | <p>gTIEI<br/>LSDV<br/>QLIK</p> | <p>91%</p> | <p>43</p> | <p>49.4998</p>  | <p>Ref</p> | <p>0.31</p> | <p>-0.04</p> | <p>0.007</p> | <p>-0.11</p>  | <p>-0.39</p> | <p>0.032</p> | <p>-0.32</p> | <p>1360</p>   | <p>1480</p>      | <p>1270</p>  | <p>1470</p>    | <p>1500</p>     | <p>1080</p>  | <p>1500</p>  | <p>1170</p>      | <p>679.8</p> | <p>2036.2</p> | <p>3</p>      | <p>0.0042</p> | <p>2.065</p>  |              |

|                                                                    |                                                                                                                                                                                                                     |                       |     |      |          |     |       |       |       |       |       |      |       |     |     |     |     |     |     |     |     |       |        |   |        |       |
|--------------------------------------------------------------------|---------------------------------------------------------------------------------------------------------------------------------------------------------------------------------------------------------------------|-----------------------|-----|------|----------|-----|-------|-------|-------|-------|-------|------|-------|-----|-----|-----|-----|-----|-----|-----|-----|-------|--------|---|--------|-------|
| 60S acidic ribosomal protein P0 OS=Homo sapiens GN=RPLP0 PE=1 SV=1 | 8 RLA0_HUMAN,sp P14869 RLA0_MOUSE,sp P19945 RLA0_RAT,sp Q29214 RLA0_PIG,sp Q95140 RLA0_BOVIN,tr A7E336 A7E336_BOVIN,tr A8K424 HUMAN,tr D2I459 D2I459_AILME, tr F1M2B8 F1M2B8_RAT, tr F1MDN4 F1MDN4_BOVIN, tr F1P720 | gTIEI<br>LSDV<br>QLIK | 88% | 39.9 | 49.49805 | Ref | 0.14  | -0.16 | 0.22  | -0.19 | -0.22 | -0   | -0.43 | 702 | 623 | 548 | 803 | 664 | 570 | 692 | 511 | 679.8 | 2036.2 | 3 | 0.0033 | 1.609 |
| 60S acidic ribosomal protein P0 OS=Homo sapiens GN=RPLP0 PE=1 SV=1 | 8 RLA0_HUMAN,sp P14869 RLA0_MOUSE,sp P19945 RLA0_RAT,sp Q29214 RLA0_PIG,sp Q95140 RLA0_BOVIN,tr A7E336 A7E336_BOVIN,tr A8K424 HUMAN,tr D2I459 D2I459_AILME, tr F1M2B8 F1M2B8_RAT, tr F1MDN4 F1MDN4_BOVIN, tr F1P720 | gTIEI<br>LSDV<br>QLIK | 81% | 36.6 | 49.83604 | Ref | 0.092 | -0.34 | 0.002 | -0.12 | -0.13 | 0.12 | -0.04 | 378 | 362 | 292 | 414 | 421 | 364 | 452 | 401 | 679.7 | 2036.2 | 3 | 0.0099 | 4.848 |

|                                                                    |                                                                                                                                                                                                                  |            |     |      |          |     |      |       |       |       |       |       |       |      |      |      |      |      |      |      |      |       |        |   |        |       |
|--------------------------------------------------------------------|------------------------------------------------------------------------------------------------------------------------------------------------------------------------------------------------------------------|------------|-----|------|----------|-----|------|-------|-------|-------|-------|-------|-------|------|------|------|------|------|------|------|------|-------|--------|---|--------|-------|
| 60S acidic ribosomal protein P0 OS=Homo sapiens GN=RPLP0 PE=1 SV=1 | 8 RLA0_HUMAN,sp P14869 RLA0_MOUSE,sp P19945 RLA0_RAT,sp Q29214 RLA0_PIG,sp Q95140 RLA0_BOVIN,tr A7E336 A7E336_BOVIN,tr A8K424 HUMAN,tr D2I459 D2I459_AILME,tr F1M2B8 F1M2B8_RAT,tr F1MDN4 F1MDN4_BOVIN,tr F1P720 | ILPHI<br>R | 83% | 31.7 | 44.23803 | Ref | 0.56 | -0.26 | 0.042 | -0.38 | 0.044 | -0.19 | -0.44 | 4590 | 6070 | 3720 | 5150 | 4230 | 4970 | 4420 | 3670 | 351.6 | 1051.7 | 3 | 0.0041 | 3.855 |
| 60S acidic ribosomal protein P0 OS=Homo sapiens GN=RPLP0 PE=1 SV=1 | 8 RLA0_HUMAN,sp P14869 RLA0_MOUSE,sp P19945 RLA0_RAT,sp Q29214 RLA0_PIG,sp Q95140 RLA0_BOVIN,tr A7E336 A7E336_BOVIN,tr A8K424 HUMAN,tr D2I459 D2I459_AILME,tr F1M2B8 F1M2B8_RAT,tr F1MDN4 F1MDN4_BOVIN,tr F1P720 | ILPHI<br>R | 87% | 34.3 | 44.23803 | Ref | 0.51 | -0.32 | 0.073 | -0.35 | 0.013 | -0.14 | -0.44 | 3240 | 4020 | 2450 | 3610 | 2980 | 3330 | 3130 | 2520 | 351.6 | 1051.7 | 3 | 0.0028 | 2.63  |

|                                                                    |                                                                                                                                                                                                                            |            |     |      |          |     |      |       |      |       |       |       |       |      |      |      |      |      |      |      |      |       |        |   |        |       |
|--------------------------------------------------------------------|----------------------------------------------------------------------------------------------------------------------------------------------------------------------------------------------------------------------------|------------|-----|------|----------|-----|------|-------|------|-------|-------|-------|-------|------|------|------|------|------|------|------|------|-------|--------|---|--------|-------|
| 60S acidic ribosomal protein P0 OS=Homo sapiens GN=RPLP0 PE=1 SV=1 | 8 RLA0_HUMAN,sp P14869 RLA0_MOUSE,sp P19945 RLA0_RAT,sp Q29214 RLA0_PIG,sp Q95140 RLA0_BOVIN,tr A7E336 A7E336_BOVIN,tr A8K424 A8K424_HUMAN,tr D2I459 D2I459_AILME, tr F1M2B8 F1M2B8_RAT, tr F1MDN4 F1MDN4_BOVIN, tr F1P720 | ILPHI<br>R | 88% | 35   | 44.23803 | Ref | 0.52 | -0.48 | 0.22 | -0.38 | -0.11 | -0.18 | -0.43 | 6000 | 6940 | 3760 | 6850 | 5000 | 5260 | 5240 | 4360 | 351.6 | 1051.7 | 3 | 0.0032 | 3.057 |
| 60S acidic ribosomal protein P0 OS=Homo sapiens GN=RPLP0 PE=1 SV=1 | 8 RLA0_HUMAN,sp P14869 RLA0_MOUSE,sp P19945 RLA0_RAT,sp Q29214 RLA0_PIG,sp Q95140 RLA0_BOVIN,tr A7E336 A7E336_BOVIN,tr A8K424 A8K424_HUMAN,tr D2I459 D2I459_AILME, tr F1M2B8 F1M2B8_RAT, tr F1MDN4 F1MDN4_BOVIN, tr F1P720 | ILPHI<br>R | 78% | 29.9 | 44.23803 | Ref | 0.58 | -0.27 | 0.11 | -0.45 | -0.15 | -0.17 | -0.46 | 6410 | 7750 | 4680 | 6840 | 5110 | 5470 | 5630 | 4570 | 351.6 | 1051.7 | 3 | 0.0018 | 1.746 |

|                                                                    |                     |                  |     |      |          |     |                            |       |       |      |      |      |      |     |                            |     |     |      |      |     |      |       |        |   |        |       |
|--------------------------------------------------------------------|---------------------|------------------|-----|------|----------|-----|----------------------------|-------|-------|------|------|------|------|-----|----------------------------|-----|-----|------|------|-----|------|-------|--------|---|--------|-------|
| Calmodulin-like protein 3 OS=Rattus norvegicus GN=Calml3 PE=2 SV=1 | sp Q5U206 CALL3_RAT | anQL TEEQ IAEF k | 87% | 40.8 | 52.55747 | Ref | Value Missing (-1.9495907) | 0.44  | 0.089 | 1.2  | 0.93 | 0.11 | 0.49 | 526 | Value Missing (-1.9495907) | 672 | 592 | 1390 | 1020 | 605 | 779  | 934.5 | 1866.9 | 2 | 0.0194 | 10.38 |
| Calmodulin-like protein 3 OS=Rattus norvegicus GN=Calml3 PE=2 SV=1 | sp Q5U206 CALL3_RAT | anQL TEEQ IAEF k | 95% | 59.5 | 52.58778 | Ref | Value Missing (-1.9361292) | 0.36  | 0.36  | 0.57 | 0.99 | 0.51 | 0.66 | 194 | Value Missing (-1.9361292) | 230 | 257 | 328  | 382  | 288 | 316  | 934.5 | 1866.9 | 2 | 0.0177 | 9.458 |
| Calmodulin-like protein 3 OS=Rattus norvegicus GN=Calml3 PE=2 SV=1 | sp Q5U206 CALL3_RAT | anQL TEEQ IAEF k | 82% | 38.5 | 52.65453 | Ref | Value Missing (-1.8655157) | -0.05 | 0.51  | 0.96 | 0.9  | 0.23 | 0.8  | 324 | Value Missing (-1.8655157) | 315 | 521 | 786  | 654  | 430 | 636  | 934.5 | 1866.9 | 2 | 0.0162 | 8.676 |
| Calmodulin-like protein 3 OS=Rattus norvegicus GN=Calml3 PE=2 SV=1 | sp Q5U206 CALL3_RAT | anQL TEEQ IAEF k | 95% | 60.1 | 52.7264  | Ref | Value Missing (-1.613563)  | 0.71  | 0.28  | 0.58 | 0.9  | 0.23 | 0.85 | 436 | Value Missing (-1.613563)  | 824 | 690 | 936  | 1020 | 668 | 1020 | 934.5 | 1866.9 | 2 | 0.0143 | 7.637 |
| Calmodulin-like protein 3 OS=Rattus norvegicus GN=Calml3 PE=2 SV=1 | sp Q5U206 CALL3_RAT | anQL TEEQ IAEF k | 69% | 35.3 | 52.7937  | Ref | Value Missing (-1.7709587) | 0.76  | 0.1   | 0.38 | 1    | 0.39 | 0.45 | 361 | Value Missing (-1.7709587) | 463 | 329 | 440  | 598  | 402 | 418  | 934.5 | 1866.9 | 2 | 0.0128 | 6.845 |

|                                                                    |                        |                      |     |      |          |     |                            |       |       |       |       |       |       |       |                            |       |       |       |       |       |       |       |        |   |        |       |
|--------------------------------------------------------------------|------------------------|----------------------|-----|------|----------|-----|----------------------------|-------|-------|-------|-------|-------|-------|-------|----------------------------|-------|-------|-------|-------|-------|-------|-------|--------|---|--------|-------|
| Calmodulin-like protein 3 OS=Rattus norvegicus GN=Calml3 PE=2 SV=1 | sp Q5U206 CALL3_6 RAT  | aNqL TEEQ IAEFK      | 95% | 70.3 | 52.67719 | Ref | Value Missing (-1.6260425) | 0.64  | 0.25  | 0.57  | 1.2   | -0.14 | 0.79  | 233   | Value Missing (-1.6260425) | 406   | 349   | 480   | 646   | 267   | 507   | 934.5 | 1866.9 | 2 | 0.0161 | 8.612 |
| Calmodulin-like protein 3 OS=Rattus norvegicus GN=Calml3 PE=2 SV=1 | sp Q5U206 CALL3_6 RAT  | aNqL TEEQ IAEFK      | 95% | 56.1 | 52.66805 | Ref | Value Missing (-1.6687646) | 0.53  | 0.37  | 0.89  | 1.1   | -0.16 | 0.4   | 188   | Value Missing (-1.6687646) | 257   | 258   | 406   | 426   | 180   | 263   | 934.5 | 1866.9 | 2 | 0.015  | 8.023 |
| RCN1 protein OS=Bos taurus GN=RCN1 PE=2 SV=1                       | tr A4IF88 A4IF88_BOVIN | aADL DSD QTA TR      | 89% | 40   | 50.68909 | Ref | -0.62                      | 0.097 | 0.005 | -0.28 | 4E-04 | -0.65 | 0.27  | 9080  | 5130                       | 9180  | 9660  | 8720  | 9270  | 6180  | 11600 | 784.4 | 1566.8 | 2 | 0.0121 | 7.693 |
| RCN1 protein OS=Bos taurus GN=RCN1 PE=2 SV=1                       | tr A4IF88 A4IF88_BOVIN | eEFT AFLH PEEF EHM k | 83% | 40   | 54.39238 | Ref | -0.24                      | 0.057 | -0.09 | -0.23 | -0.1  | -0.42 | 0.046 | 3930  | 2880                       | 3850  | 3900  | 3900  | 3720  | 3110  | 4280  | 658.1 | 2628.3 | 4 | 0.0121 | 4.59  |
| RCN1 protein OS=Bos taurus GN=RCN1 PE=2 SV=1                       | tr A4IF88 A4IF88_BOVIN | eEFT AFLH PEEF EHM k | 81% | 39.1 | 54.33213 | Ref | -0.18                      | -0.04 | -0.16 | -0.21 | -0.1  | -0.2  | 0.05  | 2050  | 1680                       | 2010  | 2070  | 2200  | 2090  | 2030  | 2400  | 658.1 | 2628.3 | 4 | 0.0148 | 5.625 |
| RCN1 protein OS=Bos taurus GN=RCN1 PE=2 SV=1                       | tr A4IF88 A4IF88_BOVIN | iDSD GDG FVTT EELK   | 95% | 61.7 | 54.08484 | Ref | -0.59                      | -0.08 | 0.008 | -0.34 | -0.07 | -0.76 | 0.21  | 36500 | 16600                      | 25700 | 30600 | 26500 | 27900 | 18100 | 35200 | 745.4 | 2233.1 | 3 | 0.0189 | 8.466 |
| RCN1 protein OS=Bos taurus GN=RCN1 PE=2 SV=1                       | tr A4IF88 A4IF88_BOVIN | tFDQ LTSE ESK        | 95% | 64.8 | 53.60445 | Ref | -0.34                      | 0.12  | -0.09 | -0.32 | 0.16  | -0.66 | -0.24 | 27500 | 16000                      | 23900 | 23100 | 21800 | 26400 | 15700 | 20800 | 947   | 1892   | 2 | 0.0145 | 7.663 |



|                                                       |                                |                                                 |     |      |          |     |       |       |       |        |       |       |       |       |       |       |       |       |       |       |       |       |        |   |        |       |
|-------------------------------------------------------|--------------------------------|-------------------------------------------------|-----|------|----------|-----|-------|-------|-------|--------|-------|-------|-------|-------|-------|-------|-------|-------|-------|-------|-------|-------|--------|---|--------|-------|
| RCN1 protein<br>OS=Bos taurus<br>GN=RCN1 PE=2<br>SV=1 | tr A4IF88<br> A4IF88_<br>BOVIN | yIYD<br>NVA<br>k                                | 94% | 46.6 | 52.77298 | Ref | -0.44 | 0.024 | -0.07 | -0.099 | 0.2   | -0.51 | -0.05 | 11700 | 8120  | 12100 | 12800 | 13800 | 14900 | 9460  | 12900 | 797.4 | 1592.9 | 2 | 0.0185 | 11.62 |
| Calumenin OS=Bos<br>taurus GN=CALU<br>PE=2 SV=1       | sp Q3T0K<br>1 CALU_B<br>OVIN   | dIVV<br>qEP<br>MED<br>IDk                       | 52% | 33.8 | 54.18586 | Ref | 0.025 | 0.042 | -0.28 | -0.3   | -0.14 | -0.11 | -0.29 | 7320  | 5510  | 6050  | 5450  | 5890  | 5780  | 6130  | 5380  | 714.1 | 2139.1 | 3 | 0.0121 | 5.653 |
| Calumenin OS=Bos<br>taurus GN=CALU<br>PE=2 SV=1       | sp Q3T0K<br>1 CALU_B<br>OVIN   | hLVY<br>ESD<br>QnK                              | 91% | 47.1 | 53.5498  | Ref | -0.29 | 0.039 | -0.06 | -0.28  | 0.12  | -0.35 | 0.009 | 19000 | 13400 | 18300 | 19200 | 18200 | 21000 | 15800 | 20100 | 614.3 | 1840   | 3 | 0.0176 | 9.581 |
| Calumenin OS=Bos<br>taurus GN=CALU<br>PE=2 SV=1       | sp Q3T0K<br>1 CALU_B<br>OVIN   | mDk<br>EETK<br>DWI<br>LPSD<br>YDH<br>AEAE<br>AR | 95% | 65   | 55.70377 | Ref | -0.66 | 0.18  | -0.02 | -0.14  | 0.039 | -0.22 | 0.093 | 2120  | 1290  | 2500  | 2440  | 2480  | 2450  | 2140  | 2640  | 916.2 | 3660.8 | 4 | 0.0282 | 7.699 |
| Calumenin OS=Bos<br>taurus GN=CALU<br>PE=2 SV=1       | sp Q3T0K<br>1 CALU_B<br>OVIN   | tFDQ<br>LTPE<br>ESk                             | 95% | 55   | 53.38156 | Ref | -0.44 | 0.32  | 0.039 | -0.35  | 0.088 | -0.24 | -0.31 | 11100 | 7100  | 13100 | 12100 | 10200 | 12000 | 10000 | 9450  | 952   | 1902   | 2 | 0.022  | 11.54 |
| Calumenin OS=Bos<br>taurus GN=CALU<br>PE=2 SV=1       | sp Q3T0K<br>1 CALU_B<br>OVIN   | tFDQ<br>LTPE<br>ESKE<br>R                       | 72% | 37.5 | 54.3602  | Ref | -0.75 | 0.23  | -0.22 | -0.087 | 0.47  | -0.29 | 0.048 | 2660  | 1940  | 4150  | 3420  | 4130  | 5300  | 3280  | 4100  | 1095  | 2187.2 | 2 | 0.0122 | 5.564 |
| Calumenin OS=Bos<br>taurus GN=CALU<br>PE=2 SV=1       | sp Q3T0K<br>1 CALU_B<br>OVIN   | vHH<br>EPQL<br>Sdk                              | 61% | 34.3 | 53.33699 | Ref | -0.54 | 0.32  | -0.1  | -0.27  | 0.15  | -0.21 | -0.27 | 7960  | 4760  | 9400  | 7860  | 7720  | 9020  | 7310  | 6970  | 899.5 | 1797   | 2 | 0.0097 | 5.415 |

|                                                                            |                                                |                     |     |      |          |     |        |       |       |        |       |       |       |       |       |       |       |       |       |       |       |       |        |   |        |       |
|----------------------------------------------------------------------------|------------------------------------------------|---------------------|-----|------|----------|-----|--------|-------|-------|--------|-------|-------|-------|-------|-------|-------|-------|-------|-------|-------|-------|-------|--------|---|--------|-------|
| Endoplasmic reticulum resident protein 29 OS=Bos taurus GN=ERP29 PE=1 SV=2 | sp P81623 ERP29_BOVIN, tr B2LYK8 B2LYK8_SH_EEP | gALP LDTI TFYK      | 84% | 39.6 | 52.91357 | Ref | 0.21   | 0.069 | 0.083 | 0.015  | -0.03 | -0.02 | -0.02 | 4730  | 4580  | 4500  | 5100  | 5370  | 4560  | 4780  | 4760  | 974.1 | 1946.1 | 2 | 0.026  | 13.34 |
| Endoplasmic reticulum resident protein 29 OS=Bos taurus GN=ERP29 PE=1 SV=2 | sp P81623 ERP29_BOVIN, tr B2LYK8 B2LYK8_SH_EEP | iLDQ GED FPAS EMT R | 95% | 51.9 | 51.50034 | Ref | -0.042 | 0.091 | 0.3   | 0.014  | 0.11  | -0.06 | -0.01 | 1910  | 1670  | 1990  | 2580  | 2340  | 2190  | 2030  | 2080  | 1007  | 2012   | 2 | 0.0148 | 7.329 |
| Endoplasmic reticulum resident protein 29 OS=Bos taurus GN=ERP29 PE=1 SV=2 | sp P81623 ERP29_BOVIN, tr B2LYK8 B2LYK8_SH_EEP | qGQ DNL ASVk        | 94% | 46.4 | 52.73973 | Ref | -0.14  | 0.15  | 0.14  | -0.067 | 0.13  | 0.017 | 0.047 | 17500 | 12900 | 17100 | 19000 | 18200 | 18200 | 17600 | 17900 | 834.5 | 1666.9 | 2 | 0.0185 | 11.11 |
| Endoplasmic reticulum resident protein 29 OS=Bos taurus GN=ERP29 PE=1 SV=2 | sp P81623 ERP29_BOVIN, tr B2LYK8 B2LYK8_SH_EEP | sLNIL TAF Qk        | 95% | 64.3 | 50.86392 | Ref | -0.13  | 0.08  | 0.14  | -0.092 | 0.21  | -0.02 | 0.038 | 3310  | 2420  | 3030  | 3540  | 3330  | 3570  | 3200  | 3290  | 872   | 1742   | 2 | 0.0168 | 9.65  |

|                                                                            |                                                |                       |     |      |          |     |        |       |       |        |       |       |       |       |       |       |       |       |       |       |       |       |        |   |        |       |
|----------------------------------------------------------------------------|------------------------------------------------|-----------------------|-----|------|----------|-----|--------|-------|-------|--------|-------|-------|-------|-------|-------|-------|-------|-------|-------|-------|-------|-------|--------|---|--------|-------|
| Endoplasmic reticulum resident protein 29 OS=Bos taurus GN=ERP29 PE=1 SV=2 | sp P81623 ERP29_BOVIN, tr B2LYK8 B2LYK8_SH_EEP | sLNIL TAF Qk          | 94% | 46.9 | 50.34653 | Ref | -0.11  | 0.13  | 0.14  | -0.081 | 0.12  | 0.13  | 0.28  | 17100 | 16800 | 21400 | 24300 | 23000 | 23000 | 24200 | 26700 | 581.7 | 1742   | 3 | 0.0098 | 5.626 |
| Endoplasmic reticulum resident protein 29 OS=Bos taurus GN=ERP29 PE=1 SV=2 | sp P81623 ERP29_BOVIN, tr B2LYK8 B2LYK8_SH_EEP | sLNIL TAF Qk          | 89% | 41.4 | 50.24252 | Ref | -0.044 | 0.003 | 0.06  | -0.023 | -0.03 | 0.11  | 0.34  | 2060  | 1820  | 2040  | 2380  | 2480  | 2160  | 2470  | 2880  | 581.7 | 1742.1 | 3 | 0.0051 | 2.906 |
| SFRS4 protein OS=Bos taurus GN=SFRS4 PE=2 SV=1                             | tr A7MB38 A7MB38_BOVIN                         | eGR GEG EDA GAN QET R | 91% | 43.1 | 49.96117 | Ref | -0.38  | -0.16 | -0.01 | -0.29  | 0.4   | -0.73 | 0.014 | 1360  | 1190  | 1490  | 1870  | 1690  | 2390  | 1140  | 1890  | 660.6 | 1978.9 | 3 | 0.0095 | 4.775 |
| SFRS4 protein OS=Bos taurus GN=SFRS4 PE=2 SV=1                             | tr A7MB38 A7MB38_BOVIN                         | gEGE DAG ANQ ETR      | 95% | 67.2 | 48.49432 | Ref | -0.051 | -0.18 | -0.04 | -0.45  | 0.032 | -0.63 | -0.1  | 3100  | 2520  | 2500  | 3090  | 2570  | 3130  | 2060  | 2960  | 546.6 | 1636.8 | 3 | 0.0076 | 4.649 |
| SFRS4 protein OS=Bos taurus GN=SFRS4 PE=2 SV=1                             | tr A7MB38 A7MB38_BOVIN                         | gEGE DAG ANQ ETR      | 95% | 64.5 | 48.49855 | Ref | -0.004 | -0.23 | -0.21 | -0.47  | 0.21  | -0.73 | -0.11 | 4560  | 3700  | 3440  | 3920  | 3590  | 5030  | 2740  | 4170  | 819.4 | 1636.8 | 2 | 0.0067 | 4.083 |
| SFRS4 protein OS=Bos taurus GN=SFRS4 PE=2 SV=1                             | tr A7MB38 A7MB38_BOVIN                         | qAG EVTY ADA HK       | 93% | 43.1 | 50.27219 | Ref | -0.12  | -0.17 | -0.22 | -0.29  | 0.006 | -0.23 | -0.23 | 18600 | 15200 | 15900 | 17200 | 18100 | 19400 | 17200 | 17100 | 788.9 | 1575.8 | 2 | 0.0144 | 9.116 |

|                                                                                          |                                |                           |     |      |          |     |        |       |       |        |       |       |       |       |       |       |       |       |       |       |       |       |        |   |        |       |
|------------------------------------------------------------------------------------------|--------------------------------|---------------------------|-----|------|----------|-----|--------|-------|-------|--------|-------|-------|-------|-------|-------|-------|-------|-------|-------|-------|-------|-------|--------|---|--------|-------|
| SFRS4 protein<br>OS=Bos taurus<br>GN=SFRS4 PE=2<br>SV=1                                  | tr A7MB3<br>8 A7MB3<br>8_BOVIN | qAG<br>EVTY<br>ADA<br>HK  | 95% | 58.1 | 53.49507 | Ref | 0.0051 | -0.38 | -0.01 | -0.34  | 0.032 | -0.48 | -0.19 | 32100 | 27500 | 22900 | 33100 | 29000 | 32900 | 24200 | 29200 | 633.3 | 1897   | 3 | 0.0184 | 9.706 |
| SFRS4 protein<br>OS=Bos taurus<br>GN=SFRS4 PE=2<br>SV=1                                  | tr A7MB3<br>8 A7MB3<br>8_BOVIN | vIVE<br>HAR               | 86% | 41.8 | 52.64374 | Ref | 0.13   | -0.2  | -0.06 | -0.55  | 0.17  | -0.48 | -0.3  | 14100 | 14700 | 12600 | 15600 | 12200 | 17600 | 11700 | 13200 | 376.6 | 1126.7 | 3 | 0.0104 | 9.25  |
| UV excision repair<br>protein RAD23<br>homolog B OS=Bos<br>taurus GN=RAD23B<br>PE=2 SV=1 | sp Q29RK<br>4 RD23B_<br>BOVIN  | aVEY<br>LLM<br>GIPG<br>DR | 92% | 44.4 | 52.98945 | Ref | 0.083  | -0.26 | 0.061 | -0.16  | 0.14  | -0.57 | -0.03 | 2870  | 2610  | 2230  | 3140  | 2960  | 3190  | 2040  | 2940  | 869.5 | 1736.9 | 2 | 0.0044 | 2.517 |
| UV excision repair<br>protein RAD23<br>homolog B OS=Bos<br>taurus GN=RAD23B<br>PE=2 SV=1 | sp Q29RK<br>4 RD23B_<br>BOVIN  | aVEY<br>LLM<br>GIPG<br>DR | 95% | 53.8 | 53.06387 | Ref | 0.051  | -0.34 | 0.032 | -0.081 | 0.081 | -0.65 | 0.004 | 541   | 438   | 361   | 527   | 537   | 524   | 331   | 515   | 869.5 | 1736.9 | 2 | 0.0094 | 5.394 |
| UV excision repair<br>protein RAD23<br>homolog B OS=Bos<br>taurus GN=RAD23B<br>PE=2 SV=1 | sp Q29RK<br>4 RD23B_<br>BOVIN  | iDID<br>PDET<br>VR        | 89% | 40.7 | 51.60427 | Ref | 0.0002 | -0.32 | 0.037 | -0.22  | 0.26  | -0.37 | 0.004 | 49800 | 45600 | 39600 | 57000 | 52500 | 64000 | 43200 | 55600 | 738.9 | 1475.8 | 2 | 0.0111 | 7.499 |

|                                                                              |                                               |                                      |     |      |          |     |        |       |       |        |       |       |       |       |       |       |       |       |       |       |       |       |        |   |        |       |
|------------------------------------------------------------------------------|-----------------------------------------------|--------------------------------------|-----|------|----------|-----|--------|-------|-------|--------|-------|-------|-------|-------|-------|-------|-------|-------|-------|-------|-------|-------|--------|---|--------|-------|
| UV excision repair protein RAD23 homolog B OS=Bos taurus GN=RAD23B PE=2 SV=1 | sp Q29RK4 RD23B_BOVIN                         | iLND DTAL k                          | 64% | 33.7 | 51.75854 | Ref | -0.21  | -0.23 | 0.11  | -0.12  | 0.031 | -0.22 | -0.06 | 16800 | 12100 | 13000 | 18500 | 17400 | 16800 | 14800 | 16400 | 537.7 | 1609.9 | 3 | 0.0052 | 3.213 |
| UV excision repair protein RAD23 homolog B OS=Bos taurus GN=RAD23B PE=2 SV=1 | sp Q29RK4 RD23B_BOVIN                         | qEkP AERP VETP VATT PTST DSTS GDS SR | 81% | 40.3 | 55.78911 | Ref | -0.27  | -0.2  | 0.21  | -0.036 | 0.023 | -0.7  | 0.2   | 2010  | 1470  | 1670  | 2490  | 2310  | 2110  | 1330  | 2470  | 910.7 | 3638.8 | 4 | 0.0284 | 7.816 |
| UV excision repair protein RAD23 homolog B OS=Bos taurus GN=RAD23B PE=2 SV=1 | sp Q29RK4 RD23B_BOVIN                         | tLQQ QTFK                            | 86% | 39.2 | 51.59444 | Ref | -0.11  | -0.3  | 0.13  | -0.17  | 0.25  | -0.54 | 0.066 | 7160  | 5980  | 5670  | 8590  | 7700  | 8970  | 5410  | 8200  | 801.5 | 1600.9 | 2 | 0.0067 | 4.173 |
| Annexin A1 OS=Bos taurus GN=ANXA1 PE=2 SV=2                                  | sp P46193 ANXA1_BOVIN, tr F1N650 F1N650_BOVIN | aLLS LAK                             | 64% | 27.5 | 45.65199 | Ref | -0.065 | -0.37 | -0.35 | 0.008  | -0.01 | 0.042 | -0.6  | 8680  | 7280  | 6410  | 7280  | 10300 | 8860  | 9600  | 6090  | 442   | 1322.9 | 3 | 0.0017 | 1.251 |
| Annexin A1 OS=Bos taurus GN=ANXA1 PE=2 SV=2                                  | sp P46193 ANXA1_BOVIN, tr F1N650 F1N650_BOVIN | aLLS LAK                             | 51% | 27.9 | 48.43861 | Ref | 0.083  | 0.014 | -0.57 | -0.016 | 0.11  | -0.11 | -0.65 | 11100 | 12500 | 13000 | 9730  | 15700 | 14900 | 13400 | 9190  | 442   | 1322.9 | 3 | 0.0212 | 15.98 |
| Annexin A1 OS=Bos taurus GN=ANXA1 PE=2 SV=2                                  | sp P46193 ANXA1_BOVIN, tr F1N650 F1N650_BOVIN | amV SEFL k                           | 95% | 54.9 | 50.80663 | Ref | 0.34   | 0.026 | -0.84 | -0.3   | 0.033 | -0.25 | -0.67 | 1810  | 1900  | 1660  | 1020  | 1630  | 1800  | 1550  | 1150  | 643.8 | 1285.7 | 2 | 0.0075 | 5.858 |

|                                                            |                                               |                                                  |     |      |          |     |        |       |       |        |       |       |       |       |       |       |       |       |       |       |       |       |        |   |        |       |
|------------------------------------------------------------|-----------------------------------------------|--------------------------------------------------|-----|------|----------|-----|--------|-------|-------|--------|-------|-------|-------|-------|-------|-------|-------|-------|-------|-------|-------|-------|--------|---|--------|-------|
| Annexin A1 OS=Bos taurus GN=ANXA1 PE=2 SV=2                | sp P46193 ANXA1_BOVIN, tr F1N650 F1N650_BOVIN | gDRS<br>EELA<br>VND<br>DLA<br>DSD<br>AR          | 87% | 41.2 | 51.63033 | Ref | -0.15  | -0.33 | -0.02 | -0.11  | -0.14 | -0.21 | 0.01  | 7530  | 7320  | 7040  | 9740  | 10200 | 8640  | 8620  | 9950  | 784.7 | 2351.1 | 3 | 0.0142 | 6.038 |
| Annexin A1 OS=Bos taurus GN=ANXA1 PE=2 SV=2                | sp P46193 ANXA1_BOVIN, tr F1N650 F1N650_BOVIN | gGP<br>GSA<br>VSPY<br>PTFN<br>PSSD<br>VEAL<br>HK | 56% | 36   | 55.61161 | Ref | -0.46  | -0.05 | -0.66 | 0.27   | 0.13  | -0.03 | -0.78 | 1240  | 776   | 1110  | 823   | 1720  | 1360  | 1270  | 756   | 1008  | 3021.5 | 3 | 0.0235 | 7.771 |
| Annexin A1 OS=Bos taurus GN=ANXA1 PE=2 SV=2                | sp P46193 ANXA1_BOVIN, tr F1N650 F1N650_BOVIN | gVDE<br>ATIIE<br>ILTK                            | 91% | 45.1 | 51.96616 | Ref | -0.083 | -0.47 | -0.27 | 0.038  | -0.12 | -0.06 | -0.72 | 1910  | 1320  | 1100  | 1410  | 1930  | 1500  | 1640  | 1030  | 670.7 | 2009.2 | 3 | 0.0168 | 8.38  |
| Uncharacterized protein (Fragment) OS=Bos taurus PE=4 SV=1 | tr F1MKC1 F1MKC1_BOVIN                        | eAEE<br>TOS<br>GLQ<br>AEcD<br>QYR                | 64% | 28.9 | 47.02129 | Ref | 0.22   | -0.38 | -0.18 | 0.07   | 0.11  | -0    | -0.05 | 10700 | 10600 | 7570  | 9770  | 12800 | 11400 | 11100 | 10700 | 769.7 | 2306   | 3 | 0.0142 | 6.153 |
| Uncharacterized protein (Fragment) OS=Bos taurus PE=4 SV=1 | tr F1MKC1 F1MKC1_BOVIN                        | IEAE<br>LEK                                      | 85% | 38.3 | 51.2608  | Ref | -0.15  | -0.09 | -0.09 | -0.003 | 0.055 | -0.05 | -0.06 | 23200 | 15300 | 17200 | 19400 | 22700 | 20600 | 20100 | 19700 | 720.4 | 1438.8 | 2 | #####  | 0.324 |
| Uncharacterized protein (Fragment) OS=Bos taurus PE=4 SV=1 | tr F1MKC1 F1MKC1_BOVIN                        | SILAE<br>TEA<br>MLK                              | 95% | 54.2 | 52.37089 | Ref | -0.11  | 0.16  | -0.12 | 0.024  | -0.11 | 0.079 | -0.26 | 7210  | 5130  | 6720  | 6190  | 7540  | 5980  | 7140  | 5610  | 605.4 | 1813   | 3 | 0.0069 | 3.796 |

|                                                                  |                                |                            |     |      |          |     |       |       |       |        |       |       |       |       |       |       |       |       |       |       |       |       |        |   |        |       |
|------------------------------------------------------------------|--------------------------------|----------------------------|-----|------|----------|-----|-------|-------|-------|--------|-------|-------|-------|-------|-------|-------|-------|-------|-------|-------|-------|-------|--------|---|--------|-------|
| Uncharacterized protein (Fragment)<br>OS=Bos taurus PE=4<br>SV=1 | tr F1MKC<br>1 F1MKC<br>1_BOVIN | sVEE<br>EEQ<br>VWK         | 88% | 43.7 | 53.48383 | Ref | -0.14 | 0.17  | 0.18  | -0.026 | -0.01 | -0.17 | -0.08 | 7780  | 6460  | 8690  | 9820  | 9360  | 8290  | 7700  | 8180  | 624.3 | 1870   | 3 | 0.0176 | 9.421 |
| Uncharacterized protein (Fragment)<br>OS=Bos taurus PE=4<br>SV=1 | tr F1MKC<br>1 F1MKC<br>1_BOVIN | sVEE<br>EEQ<br>VWK         | 90% | 45.6 | 53.46824 | Ref | 0.051 | -0.2  | 0.061 | 0.093  | -0.03 | -0    | -0.05 | 8600  | 7950  | 7230  | 9760  | 11000 | 8840  | 9380  | 9030  | 624.3 | 1870   | 3 | 0.0153 | 8.154 |
| Uncharacterized protein (Fragment)<br>OS=Bos taurus PE=4<br>SV=1 | tr F1MKC<br>1 F1MKC<br>1_BOVIN | vSAA<br>EEEL<br>QES<br>R   | 60% | 32   | 51.22881 | Ref | 1.2   | -0.79 | -1    | -0.85  | 1.3   | -0.91 | -0.82 | 4860  | 16600 | 4680  | 4410  | 5580  | 21300 | 4860  | 5150  | 826.4 | 1650.8 | 2 | 0.0174 | 10.55 |
| Lupus La protein homolog OS=Bos taurus GN=SSB<br>PE=2 SV=2       | sp P1088<br>1 LA_BO<br>VIN     | aAQ<br>AGS<br>Ak           | 54% | 31.6 | 51.81807 | Ref | -0.23 | -0.31 | 0.024 | -0.067 | 0.22  | -0.58 | -0.08 | 23400 | 17300 | 17900 | 25200 | 26100 | 27700 | 16600 | 23500 | 656.4 | 1310.8 | 2 | 0.0041 | 3.139 |
| Lupus La protein homolog OS=Bos taurus GN=SSB<br>PE=2 SV=2       | sp P1088<br>1 LA_BO<br>VIN     | gSIF<br>AVF<br>DSIE<br>SAk | 95% | 56.7 | 53.93006 | Ref | 0.11  | -0.42 | -0.37 | -0.14  | -0.1  | -0.37 | 0.25  | 767   | 721   | 539   | 625   | 811   | 730   | 632   | 960   | 693.7 | 2078.1 | 3 | 0.0205 | 9.883 |
| Lupus La protein homolog OS=Bos taurus GN=SSB<br>PE=2 SV=2       | sp P1088<br>1 LA_BO<br>VIN     | gSIF<br>AVF<br>DSIE<br>SAk | 57% | 34.3 | 53.79516 | Ref | 0.47  | -0.85 | -0.02 | -0.27  | -0.15 | -0.31 | -0.28 | 312   | 333   | 145   | 289   | 268   | 254   | 239   | 242   | 693.7 | 2078.1 | 3 | 0.0035 | 1.702 |

|                                                         |                                           |                   |     |      |          |     |       |       |       |        |       |       |       |       |       |       |       |       |       |       |       |       |        |   |        |       |
|---------------------------------------------------------|-------------------------------------------|-------------------|-----|------|----------|-----|-------|-------|-------|--------|-------|-------|-------|-------|-------|-------|-------|-------|-------|-------|-------|-------|--------|---|--------|-------|
| Lupus La protein homolog OS=Bos taurus GN=SSB PE=2 SV=2 | sp P10881 LA_BOVIN                        | IIEDQQE SLNK      | 71% | 37.2 | 53.60205 | Ref | 0.023 | -0.25 | -0.1  | -0.005 | 0.12  | -0.72 | -0.16 | 30700 | 26400 | 23800 | 29500 | 34800 | 33100 | 19400 | 28300 | 642.4 | 1924.1 | 3 | 0.011  | 5.726 |
| Lupus La protein homolog OS=Bos taurus GN=SSB PE=2 SV=2 | sp P10881 LA_BOVIN                        | kFVE TPG QK       | 63% | 31.6 | 49.95429 | Ref | 0.046 | -0.31 | 0.083 | -0.16  | -0.02 | -0.2  | -0.24 | 13700 | 13400 | 11300 | 16700 | 15600 | 15000 | 13800 | 13300 | 649.4 | 1945.2 | 3 | 0.0062 | 3.193 |
| Lupus La protein homolog OS=Bos taurus GN=SSB PE=2 SV=2 | sp P10881 LA_BOVIN                        | ITTD FNVI VEAL Sk | 95% | 56.6 | 52.6611  | Ref | 0.22  | -0.93 | 0.019 | -0.4   | 0.12  | -0.12 | 0.01  | 328   | 356   | 175   | 378   | 311   | 391   | 346   | 375   | 720.1 | 2157.2 | 3 | 0.008  | 3.722 |
| Kininogen-1 OS=Bos taurus GN=KNG1 PE=1 SV=1             | sp P01044 KNG1_BOVIN,sp P01045 KNG2_BOVIN | IHGL GLG Hk       | 61% | 29.6 | 50.10368 | Ref | 0.19  | 0.19  | 0.5   | 0.12   | 0.17  | 0.76  | 0.052 | 30200 | 27000 | 29300 | 40800 | 34500 | 31300 | 49200 | 29800 | 385.7 | 1538.9 | 4 | 0.0056 | 3.65  |
| Kininogen-1 OS=Bos taurus GN=KNG1 PE=1 SV=1             | sp P01044 KNG1_BOVIN,sp P01045 KNG2_BOVIN | IHGL GLG Hk       | 72% | 31.9 | 50.0356  | Ref | 0.27  | 0.21  | 0.42  | 0.19   | 0.15  | 0.76  | 0.15  | 5090  | 5300  | 5530  | 7160  | 6740  | 5710  | 9140  | 5960  | 385.7 | 1538.9 | 4 | 0.0048 | 3.105 |
| Kininogen-1 OS=Bos taurus GN=KNG1 PE=1 SV=1             | sp P01044 KNG1_BOVIN,sp P01045 KNG2_BOVIN | mDN PDTF YSLk     | 93% | 49.1 | 53.10334 | Ref | 0.62  | 0.26  | 0.21  | 0.21   | -0.13 | 0.58  | 0.37  | 10800 | 14400 | 12300 | 13300 | 14600 | 10100 | 17200 | 14800 | 647   | 1938   | 3 | 0.0173 | 8.898 |
| Kininogen-1 OS=Bos taurus GN=KNG1 PE=1 SV=1             | sp P01044 KNG1_BOVIN,sp P01045 KNG2_BOVIN | mDN PDTF YSLk     | 84% | 41.4 | 53.1391  | Ref | 0.4   | 0.1   | 0.39  | 0.27   | -0.1  | 0.81  | 0.4   | 7640  | 10500 | 9270  | 12700 | 12900 | 8710  | 17000 | 12700 | 647   | 1938   | 3 | 0.016  | 8.248 |



|                                                           |                                                                                                                                                                                                                                                      |                  |     |      |          |     |      |       |       |       |       |       |       |       |       |       |       |       |       |       |       |       |        |   |        |       |
|-----------------------------------------------------------|------------------------------------------------------------------------------------------------------------------------------------------------------------------------------------------------------------------------------------------------------|------------------|-----|------|----------|-----|------|-------|-------|-------|-------|-------|-------|-------|-------|-------|-------|-------|-------|-------|-------|-------|--------|---|--------|-------|
| Kininogen-1 OS=Bos taurus GN=KNG1 PE=1 SV=1               | sp P01044 KNG1_BOVIN,sp P01045 KNG2_BOVIN                                                                                                                                                                                                            | qHG LGH GHK      | 83% | 40   | 52.40591 | Ref | 0.31 | 0.47  | 0.19  | 0.23  | 0.061 | 0.64  | 0.17  | 16600 | 16300 | 19700 | 18300 | 20800 | 16100 | 25000 | 18100 | 527   | 1577.9 | 3 | 0.0213 | 13.48 |
| Kininogen-1 OS=Bos taurus GN=KNG1 PE=1 SV=1               | sp P01044 KNG1_BOVIN,sp P01045 KNG2_BOVIN                                                                                                                                                                                                            | sLSS GDT GEcT Dk | 95% | 75.1 | 50.29887 | Ref | 0.48 | 0.11  | 0.35  | 0.33  | -0.25 | 0.93  | 0.22  | 6660  | 9700  | 8120  | 10800 | 11700 | 6810  | 16100 | 9790  | 977.5 | 1952.9 | 2 | 0.0127 | 6.483 |
| Src substrate cortactin OS=Homo sapiens GN=CTTN PE=1 SV=2 | 7 SRC8_HUMAN,sp Q60598 SRC8_MOUSE,trans D3ZGE6 D3ZGE6_RAT,trans D3ZRB0 D3ZRB0_RAT,trans E2RIQ2 E2RIQ2_CANFA,trans F1RY84 F1RY84_PIG,trans F6WKM3 F6WKM3_HORSE,trans F6X4S0 F6X4S0_HORSE,trans O70419 O70419_RAT,trans O70420 O70420_RAT,trans Q1RMR3 | sAV GFY QGk      | 50% | 32.4 | 53.02108 | Ref | -0.2 | -0.41 | -0.51 | -0.36 | -0.18 | -0.66 | -0.05 | 44100 | 32800 | 30800 | 32100 | 39400 | 38900 | 29100 | 44100 | 565.3 | 1692.9 | 3 | 0.0145 | 8.563 |

|                                                                    |                                                                                                                                                                                                                                                                                                                                   |                           |     |      |          |     |       |       |       |        |      |       |       |       |       |       |       |       |       |      |       |       |        |   |        |       |
|--------------------------------------------------------------------|-----------------------------------------------------------------------------------------------------------------------------------------------------------------------------------------------------------------------------------------------------------------------------------------------------------------------------------|---------------------------|-----|------|----------|-----|-------|-------|-------|--------|------|-------|-------|-------|-------|-------|-------|-------|-------|------|-------|-------|--------|---|--------|-------|
| Src substrate<br>cortactin OS=Homo<br>sapiens GN=CTTN<br>PE=1 SV=2 | 7 SRC8_H<br>UMAN,sp<br> Q60598 <br>SRC8_MO<br>USE,tr D3<br>ZGE6 D3Z<br>GE6_RAT,<br>tr D3ZRB<br>0 D3ZRB0<br>_RAT,tr E<br>2RIQ2 E2<br>RIQ2_CA<br>NFA,tr F1<br>RY84 F1R<br>Y84_PIG,t<br>r F6WKM<br>3 F6WKM<br>3_HORSE,<br>tr F6X4S0<br> F6X4S0_<br>HORSE,tr <br>O70419 <br>O70419_R<br>AT,tr O70<br>420 O704<br>20_RAT,tr<br> Q1RMR3 | SAV<br>GFEY<br>QGk        | 95% | 54.9 | 53.07669 | Ref | -0.49 | -0.36 | -0.54 | -0.18  | 0.11 | -0.88 | -0.16 | 16600 | 10000 | 11900 | 11800 | 16600 | 17800 | 9350 | 15300 | 847.5 | 1692.9 | 2 | 0.014  | 8.27  |
| Src substrate<br>cortactin OS=Homo<br>sapiens GN=CTTN<br>PE=1 SV=2 | 7 SRC8_H<br>UMAN,sp<br> Q60598 <br>SRC8_MO<br>USE,tr D3<br>ZGE6 D3Z<br>GE6_RAT,<br>tr D3ZRB<br>0 D3ZRB0<br>_RAT,tr E<br>2RIQ2 E2<br>RIQ2_CA<br>NFA,tr F1<br>RY84 F1R<br>Y84_PIG,t<br>r F6WKM<br>3 F6WKM<br>3_HORSE,<br>tr F6X4S0<br> F6X4S0_<br>HORSE,tr <br>O70419 <br>O70419_R<br>AT,tr O70<br>420 O704<br>20_RAT,tr<br> Q1RMR3 | vDQ<br>SAV<br>GFEY<br>QGk | 95% | 51.2 | 53.77927 | Ref | -0.58 | -0.41 | -0.62 | -0.098 | 0.13 | -0.68 | -0.23 | 9400  | 5310  | 6490  | 6270  | 9940  | 10100 | 6070 | 8190  | 1019  | 2035.1 | 2 | 0.0174 | 8.557 |

|                                                                    |                                                                                                                                                                                                                                                                                                                                   |                           |     |      |          |     |       |       |       |       |       |       |      |       |       |       |       |       |       |       |       |       |        |   |        |       |
|--------------------------------------------------------------------|-----------------------------------------------------------------------------------------------------------------------------------------------------------------------------------------------------------------------------------------------------------------------------------------------------------------------------------|---------------------------|-----|------|----------|-----|-------|-------|-------|-------|-------|-------|------|-------|-------|-------|-------|-------|-------|-------|-------|-------|--------|---|--------|-------|
| Src substrate<br>cortactin OS=Homo<br>sapiens GN=CTTN<br>PE=1 SV=2 | 7 SRC8_H<br>UMAN,sp<br> Q60598 <br>SRC8_MO<br>USE,tr D3<br>ZGE6 D3Z<br>GE6_RAT,<br>tr D3ZRB<br>0 D3ZRB0<br>_RAT,tr E<br>2RIQ2 E2<br>RIQ2_CA<br>NFA,tr F1<br>RY84 F1R<br>Y84_PIG,t<br>r F6WKM<br>3 F6WKM<br>3_HORSE,<br>tr F6X4S0<br> F6X4S0_<br>HORSE,tr <br>O70419 <br>O70419_R<br>AT,tr O70<br>420 O704<br>20_RAT,tr<br> Q1RMR3 | vDQ<br>SAV<br>GFEY<br>QGK | 95% | 54.8 | 53.77863 | Ref | -0.47 | -0.42 | -0.54 | -0.29 | 0.029 | -0.7  | 0.12 | 63500 | 43900 | 49500 | 51200 | 67100 | 72900 | 45800 | 80400 | 679.4 | 2035.1 | 3 | 0.0171 | 8.422 |
| Src substrate<br>cortactin OS=Homo<br>sapiens GN=CTTN<br>PE=1 SV=2 | 7 SRC8_H<br>UMAN,sp<br> Q60598 <br>SRC8_MO<br>USE,tr D3<br>ZGE6 D3Z<br>GE6_RAT,<br>tr D3ZRB<br>0 D3ZRB0<br>_RAT,tr E<br>2RIQ2 E2<br>RIQ2_CA<br>NFA,tr F1<br>RY84 F1R<br>Y84_PIG,t<br>r F6WKM<br>3 F6WKM<br>3_HORSE,<br>tr F6X4S0<br> F6X4S0_<br>HORSE,tr <br>O70419 <br>O70419_R<br>AT,tr O70<br>420 O704<br>20_RAT,tr<br> Q1RMR3 | vDQ<br>SAV<br>GFEY<br>QGK | 95% | 54   | 53.74594 | Ref | -0.48 | -0.44 | -0.57 | -0.35 | 0.093 | -0.71 | 0.13 | 54400 | 37000 | 41000 | 42200 | 54400 | 64300 | 38500 | 68300 | 679.4 | 2035.1 | 3 | 0.0149 | 7.332 |

|                                                              |                                                                                                                                                                                                                            |                           |     |      |          |     |                                |                               |                                |                                |                                |                               |                         |                         |                                |                               |                                |                               |                                |                               |                         |       |        |   |        |       |
|--------------------------------------------------------------|----------------------------------------------------------------------------------------------------------------------------------------------------------------------------------------------------------------------------|---------------------------|-----|------|----------|-----|--------------------------------|-------------------------------|--------------------------------|--------------------------------|--------------------------------|-------------------------------|-------------------------|-------------------------|--------------------------------|-------------------------------|--------------------------------|-------------------------------|--------------------------------|-------------------------------|-------------------------|-------|--------|---|--------|-------|
| Src substrate<br>cortactin OS=Homo sapiens GN=CTTN PE=1 SV=2 | 7 SRC8_HUMAN,sp Q60598 SRC8_MOUSE,triD3ZGE6 D3ZGE6_RAT,triD3ZRB0 D3ZRB0_RAT,triE2RIQ2 E2RIQ2_CAF1RIFA,triF1RY84 F1RY84_PIG,triF6WK3 F6WK3_HORSE,triF6X4S0 F6X4S0_HORSE,triO70419 O70419_RAT,triO70420 O70420_RAT,triQ1RMR3 | YGLFPANRYVEL              | 92% | 44.5 | 53.16801 | Ref | -0.46                          | -0.29                         | -0.5                           | -0.32                          | 0.097                          | -0.69                         | -0.18                   | 2870                    | 1840                           | 2260                          | 2190                           | 2730                          | 3190                           | 1920                          | 2720                    | 873.5 | 1744.9 | 2 | 0.0149 | 8.51  |
| Alpha-1B-glycoprotein OS=Bos taurus GN=A1BG PE=1 SV=1        | sp Q2KJF1 A1BG_BOVIN                                                                                                                                                                                                       | gAEEQLVPR                 | 73% | 34.4 | 50.99249 | Ref | 0.74                           | 0.28                          | 0.46                           | 0.39                           | -0.04                          | 0.73                          | 0.2                     | 15100                   | 21900                          | 17300                         | 22000                          | 23100                         | 15000                          | 26700                         | 18300                   | 651.9 | 1301.7 | 2 | 0.0105 | 8.04  |
| Alpha-1B-glycoprotein OS=Bos taurus GN=A1BG PE=1 SV=1        | sp Q2KJF1 A1BG_BOVIN                                                                                                                                                                                                       | gVTFLLR                   | 60% | 30.3 | 49.48002 | Ref | 0.86                           | 0.064                         | 0.64                           | 0.32                           | -0.26                          | 0.92                          | 0.11                    | 27900                   | 49100                          | 30800                         | 51500                          | 45400                         | 26500                          | 62800                         | 35600                   | 555.3 | 1108.7 | 2 | 0.0089 | 8.008 |
| Alpha-1B-glycoprotein OS=Bos taurus GN=A1BG PE=1 SV=1        | sp Q2KJF1 A1BG_BOVIN                                                                                                                                                                                                       | IEGEDQFLEVAEPAEATQATFPVHR | 95% | 106  | 55.28553 | Ref | Reference Missing (0.58562493) | Reference Missing (0.6225689) | Reference Missing (0.34078515) | Reference Missing (0.53490085) | Reference Missing (0.31190085) | Reference Missing (0.7516165) | No Values (-0.29224774) | No Values (-0.21385014) | Reference Missing (0.58562493) | Reference Missing (0.6225689) | Reference Missing (0.34078515) | Reference Missing (0.5343475) | Reference Missing (0.31190085) | Reference Missing (0.7516165) | No Values (-0.29224774) | 1030  | 3087.5 | 3 | 0.0131 | 4.249 |

|                                                                |                                                                                                                                                                                   |                            |     |      |          |     |      |       |       |        |       |       |       |      |      |      |       |       |       |      |       |       |      |   |        |       |
|----------------------------------------------------------------|-----------------------------------------------------------------------------------------------------------------------------------------------------------------------------------|----------------------------|-----|------|----------|-----|------|-------|-------|--------|-------|-------|-------|------|------|------|-------|-------|-------|------|-------|-------|------|---|--------|-------|
| Alpha-1B-glycoprotein<br>OS=Bos taurus<br>GN=A1BG PE=1<br>SV=1 | sp Q2KJF1 A1BG_BOVIN                                                                                                                                                              | vLSP<br>AGP<br>EAQ<br>FELR | 82% | 40.5 | 53.33223 | Ref | 1.2  | -0.07 | 4E-04 | 0.43   | 0.069 | 0.24  | 0.089 | 2430 | 3070 | 1420 | 1680  | 2490  | 1690  | 2000 | 1780  | 606.7 | 1817 | 3 | 0.0152 | 8.352 |
| Alpha-1B-glycoprotein<br>OS=Bos taurus<br>GN=A1BG PE=1<br>SV=1 | sp Q2KJF1 A1BG_BOVIN                                                                                                                                                              | vLSP<br>AGP<br>EAQ<br>FELR | 94% | 50.8 | 53.37273 | Ref | 0.29 | 0.35  | 0.73  | 0.12   | -0.1  | 0.45  | 0.23  | 2440 | 1570 | 1790 | 2600  | 1880  | 1410  | 2160 | 1830  | 606.7 | 1817 | 3 | 0.0134 | 7.345 |
| Alpha-1B-glycoprotein<br>OS=Bos taurus<br>GN=A1BG PE=1<br>SV=1 | sp Q2KJF1 A1BG_BOVIN                                                                                                                                                              | vLSP<br>AGP<br>EAQ<br>FELR | 88% | 42   | 53.34323 | Ref | 0.76 | -0.02 | 0.44  | 0.48   | -0.1  | 0.89  | 0.26  | 2710 | 4210 | 2660 | 4110  | 4670  | 2720  | 5660 | 3630  | 909.5 | 1817 | 2 | 0.0053 | 2.941 |
| 14-3-3 protein eta<br>OS=Bos taurus<br>GN=YWHAH PE=1<br>SV=2   | sp P68509 1433F_BOVIN,sp P68510 1433F_MOUSE,sp P68511 1433F_RAT,tr B2KIH1 B2KIH1_RHIFE,tr B7NZM8 B7NZM8_RABIT,tr C3PSX4 C3PSX4_DASNO,tr F2Z4Y1 F2Z4Y1_PIG,tr F6WA79 F6WA79_MOND_O | avTE<br>LNEP<br>LSNE<br>DR | 95% | 51.5 | 52.63963 | Ref | 0.13 | -0.26 | 0.21  | -0.065 | 0.26  | -0.48 | 0.089 | 9450 | 9000 | 7460 | 11600 | 10500 | 11600 | 7220 | 10600 | 946   | 1890 | 2 | 0.0134 | 7.091 |

|                                                              |                                                                                                                                                                                       |                    |     |      |          |     |       |       |       |       |      |       |       |       |       |       |       |       |       |       |       |       |        |   |        |       |
|--------------------------------------------------------------|---------------------------------------------------------------------------------------------------------------------------------------------------------------------------------------|--------------------|-----|------|----------|-----|-------|-------|-------|-------|------|-------|-------|-------|-------|-------|-------|-------|-------|-------|-------|-------|--------|---|--------|-------|
| 14-3-3 protein eta<br>OS=Bos taurus<br>GN=YWHAH PE=1<br>SV=2 | sp P68509 1433F_BOVIN,sp P68510 1433F_MOUSE,sp P68511 1433F_RAT, tr B2KIH1 B2KIH1_RHIFE, tr B7NZM8 B7NZM8_RABIT, tr C3PSX4 C3PSX4_DASNO, tr F2Z4Y1 F2Z4Y1_PIG, tr F6WA79 F6WA79_MONDO | eHM<br>QPT<br>HPIR | 95% | 68.5 | 51.97815 | Ref | 0.22  | -0.18 | 0.25  | -0.21 | 0.16 | -0.08 | 0.014 | 38600 | 45600 | 37700 | 56800 | 45600 | 51500 | 45500 | 48200 | 388.2 | 1548.8 | 4 | 0.0122 | 7.884 |
| 14-3-3 protein eta<br>OS=Bos taurus<br>GN=YWHAH PE=1<br>SV=2 | sp P68509 1433F_BOVIN,sp P68510 1433F_MOUSE,sp P68511 1433F_RAT, tr B2KIH1 B2KIH1_RHIFE, tr B7NZM8 B7NZM8_RABIT, tr C3PSX4 C3PSX4_DASNO, tr F2Z4Y1 F2Z4Y1_PIG, tr F6WA79 F6WA79_MONDO | eHM<br>QPT<br>HPIR | 81% | 38.8 | 52.16185 | Ref | 0.036 | -0.01 | -0.23 | -0.24 | 0.38 | 0.12  | -0.08 | 13800 | 12600 | 13200 | 12800 | 13900 | 18800 | 16300 | 14100 | 517.3 | 1548.8 | 3 | 0.0105 | 6.757 |

|                                                              |                                                                                                                                                                                      |                           |     |      |          |     |                           |       |       |       |       |       |       |       |                           |       |       |       |       |       |       |       |        |   |        |       |
|--------------------------------------------------------------|--------------------------------------------------------------------------------------------------------------------------------------------------------------------------------------|---------------------------|-----|------|----------|-----|---------------------------|-------|-------|-------|-------|-------|-------|-------|---------------------------|-------|-------|-------|-------|-------|-------|-------|--------|---|--------|-------|
| 14-3-3 protein eta<br>OS=Bos taurus<br>GN=YWHAH PE=1<br>SV=2 | sp P68509 1433F_BOVIN,sp P68510 1433F_MOUSE,sp P68511 1433F_RAT, tr B2KIH1 B2KIH1_RHIFE, tr B7NZM8 B7NZM8_RABIT, tr C3PSX4 C3PSX4_DASNO, tr F2Z4Y1 F2Z4Y1_PIG, tr F6WA79 F6WA79_MOND | eHm<br>QPT<br>HPIR        | 67% | 32.4 | 51.79268 | Ref | 0.29                      | -0.07 | 0.13  | -0.35 | 0.24  | -0.44 | -0.03 | 14900 | 14700                     | 12400 | 16000 | 12700 | 16700 | 10900 | 14300 | 392.2 | 1564.8 | 4 | 0.0116 | 7.416 |
| 14-3-3 protein eta<br>OS=Bos taurus<br>GN=NUCB1 PE=1<br>SV=2 | sp P68509 1433F_BOVIN,sp P68510 1433F_MOUSE,sp P68511 1433F_RAT, tr B2KIH1 B2KIH1_RHIFE, tr B7NZM8 B7NZM8_RABIT, tr C3PSX4 C3PSX4_DASNO, tr F2Z4Y1 F2Z4Y1_PIG, tr F6WA79 F6WA79_MOND | eHm<br>QPT<br>HPIR        | 81% | 38.4 | 51.91973 | Ref | 0.2                       | -0.09 | -0.02 | -0.24 | 0.17  | -0.09 | -0.05 | 8930  | 8290                      | 7400  | 8670  | 8220  | 9520  | 8330  | 8520  | 522.6 | 1564.8 | 3 | 0.0113 | 7.195 |
| Nucleobindin-1<br>OS=Bos taurus<br>GN=NUCB1 PE=2<br>SV=1     | sp Q0P569 NUCB1_BOVIN                                                                                                                                                                | IVTL<br>EEFL<br>AST<br>QR | 95% | 55   | 53.72894 | Ref | Value Missing (-1.670629) | 0.25  | -0.05 | 0.54  | 0.068 | 0.088 | 0.002 | 165   | Value Missing (-1.670629) | 138   | 126   | 210   | 132   | 139   | 130   | 604.3 | 1810   | 3 | 0.0091 | 5.011 |

|                                                                                                   |                               |                                    |     |      |          |     |        |       |      |        |       |       |       |      |       |       |       |       |       |      |       |       |        |   |        |       |
|---------------------------------------------------------------------------------------------------|-------------------------------|------------------------------------|-----|------|----------|-----|--------|-------|------|--------|-------|-------|-------|------|-------|-------|-------|-------|-------|------|-------|-------|--------|---|--------|-------|
| Nucleobindin-1<br>OS=Bos taurus<br>GN=NUCB1 PE=2<br>SV=1                                          | sp Q0P56<br>9 NUCB1<br>_BOVIN | IVTL<br>EEFL<br>AST<br>QR          | 58% | 34.4 | 53.73317 | Ref | 0.042  | 0.18  | 0.1  | 0.2    | -0.31 | -0.11 | 0.27  | 229  | 195   | 232   | 247   | 292   | 179   | 214  | 277   | 604.3 | 1810   | 3 | 0.0098 | 5.425 |
| Nucleobindin-1<br>OS=Bos taurus<br>GN=NUCB1 PE=2<br>SV=1                                          | sp Q0P56<br>9 NUCB1<br>_BOVIN | mDA<br>QQE<br>PNIQ<br>LDHL<br>NLLK | 88% | 43.7 | 55.14481 | Ref | -0.097 | -0.15 | 0.24 | -0.094 | 0.41  | 0.013 | 0.095 | 5290 | 4240  | 4420  | 6530  | 5690  | 7050  | 5600 | 5880  | 682.9 | 2727.5 | 4 | 0.0238 | 8.718 |
| Nucleobindin-1<br>OS=Bos taurus<br>GN=NUCB1 PE=2<br>SV=1                                          | sp Q0P56<br>9 NUCB1<br>_BOVIN | mDA<br>QQE<br>PNIQ<br>LDHL<br>NLLK | 95% | 63.4 | 55.09045 | Ref | -0.008 | -0.04 | 0.1  | 0.038  | 0.36  | -0.16 | 0.19  | 1570 | 1380  | 1470  | 1820  | 1920  | 2100  | 1530 | 1930  | 910.2 | 2727.5 | 3 | 0.0199 | 7.286 |
| Nucleobindin-1<br>OS=Bos taurus<br>GN=NUCB1 PE=2<br>SV=1                                          | sp Q0P56<br>9 NUCB1<br>_BOVIN | rFEE<br>ELAA<br>R                  | 58% | 32.6 | 51.92587 | Ref | 0.47   | 0.45  | 0.15 | -0.26  | 0.039 | -0.17 | -0.16 | 2950 | 4100  | 4370  | 3980  | 3300  | 3550  | 3200 | 3200  | 475.6 | 1423.8 | 3 | 0.0135 | 9.477 |
| Nucleobindin-1<br>OS=Bos taurus<br>GN=NUCB1 PE=2<br>SV=1                                          | sp Q0P56<br>9 NUCB1<br>_BOVIN | rFEE<br>ELAA<br>R                  | 80% | 38   | 51.8531  | Ref | 0.2    | 0.31  | 0.14 | -0.17  | 0.18  | -0.28 | 0.21  | 8960 | 10200 | 11900 | 11900 | 10600 | 11800 | 8910 | 12400 | 475.6 | 1423.8 | 3 | 0.011  | 7.751 |
| PEST proteolytic<br>signal-containing<br>nuclear protein<br>OS=Bos taurus<br>GN=PCNP PE=2<br>SV=1 | sp Q32PF<br>3 PCNP_B<br>OVIN  | fGFA<br>IGSQ<br>TTk                | 88% | 43.6 | 53.12492 | Ref | -0.051 | -0.04 | 0.14 | 0.24   | 0.25  | 0.12  | 0.23  | 5990 | 5810  | 6340  | 8100  | 9520  | 8380  | 8030 | 8610  | 589   | 1764   | 3 | 0.0274 | 15.55 |



|                                                                                             |                      |                             |     |      |          |     |       |       |      |        |      |       |      |       |      |       |       |       |       |       |       |       |        |   |        |       |
|---------------------------------------------------------------------------------------------|----------------------|-----------------------------|-----|------|----------|-----|-------|-------|------|--------|------|-------|------|-------|------|-------|-------|-------|-------|-------|-------|-------|--------|---|--------|-------|
| PEST proteolytic signal-containing nuclear protein<br>OS=Bos taurus<br>GN=PCNP PE=2<br>SV=1 | sp Q32PF3 PCNP_BOVIN | sAED<br>ETA<br>DLPT<br>kPTK | 90% | 46.6 | 54.43554 | Ref | -0.53 | -0.11 | 0.24 | 0.083  | 0.65 | -0.38 | 0.35 | 13800 | 7790 | 11400 | 16200 | 16000 | 20700 | 10600 | 17500 | 839.1 | 2514.4 | 3 | 0.0197 | 7.838 |
| PEST proteolytic signal-containing nuclear protein<br>OS=Bos taurus<br>GN=PCNP PE=2<br>SV=1 | sp Q32PF3 PCNP_BOVIN | sAED<br>ETA<br>DLPT<br>kPTK | 70% | 37.8 | 54.58952 | Ref | -0.36 | -0.18 | 0.24 | 0.068  | 0.58 | -0.33 | 0.51 | 4890  | 3530 | 4340  | 6490  | 6370  | 7910  | 4400  | 7830  | 839.1 | 2514.4 | 3 | 0.0303 | 12.06 |
| PEST proteolytic signal-containing nuclear protein<br>OS=Bos taurus<br>GN=PCNP PE=2<br>SV=1 | sp Q32PF3 PCNP_BOVIN | tVSS<br>SnG<br>GEnS<br>SR   | 80% | 32.8 | 47.52364 | Ref | -0.24 | 0.047 | 0.42 | -0.039 | 0.3  | -0.41 | 0.35 | 441   | 299  | 397   | 577   | 463   | 511   | 326   | 550   | 794.4 | 1586.7 | 2 | 0.0161 | 10.13 |
| PEST proteolytic signal-containing nuclear protein<br>OS=Bos taurus<br>GN=PCNP PE=2<br>SV=1 | sp Q32PF3 PCNP_BOVIN | tVSS<br>SnG<br>GEnS<br>SR   | 87% | 35.7 | 47.58238 | Ref | -0.35 | -0.1  | 0.31 | -0.32  | 0.36 | -0.18 | 0.42 | 440   | 236  | 304   | 452   | 323   | 450   | 325   | 489   | 794.4 | 1586.7 | 2 | 0.0141 | 8.897 |

|                                                                                             |                                                                                                                                                                                                    |                           |     |      |          |     |                        |                        |                        |                          |                        |                                 |                         |                          |                            |                        |                        |                          |                        |                                 |                         |                         |        |        |        |        |       |
|---------------------------------------------------------------------------------------------|----------------------------------------------------------------------------------------------------------------------------------------------------------------------------------------------------|---------------------------|-----|------|----------|-----|------------------------|------------------------|------------------------|--------------------------|------------------------|---------------------------------|-------------------------|--------------------------|----------------------------|------------------------|------------------------|--------------------------|------------------------|---------------------------------|-------------------------|-------------------------|--------|--------|--------|--------|-------|
| PEST proteolytic signal-containing nuclear protein<br>OS=Bos taurus<br>GN=PCNP PE=2<br>SV=1 | sp Q32PF3 PCNP_BOVIN                                                                                                                                                                               | tVSS<br>SnG<br>GEnS<br>SR | 93% | 40.3 | 47.7172  | Ref | -0.43                  | -0.08                  | 0.54                   | 0.047                    | 0.45                   | -0.37                           | 0.37                    | 1360                     | 942                        | 1310                   | 2240                   | 1760                     | 2030                   | 1200                            | 1990                    | 794.4                   | 1586.7 | 2      | 0.0132 | 8.292  |       |
| Polyadenylate-binding protein 1<br>OS=Homo sapiens<br>GN=PABPC1 PE=1<br>SV=2                | 0 PABP1_HUMAN,sp P29341 PABP1_MOUSE,sp P61286 PABP1_BOVIN,sp Q5R8F7 PABP1_PONAB,sp Q9EPH8 PABP1_RAT,sp Q9H361 PABP3_HUMAN,tr B3KT93 B3KT93_HUMAN,tr B4DQX0 B4DQX0_HUMAN, B4DZW4 B4DZW4_HUMAN, D2GY | aVNS<br>ATG<br>VPTV       | 95% | 56.7 | 51.20705 | Ref | No Values (0.30067667) | No Values (0.18298334) | No Values (0.01638869) | No Values (-0.124090575) | No Values (0.07178198) | Reference Missing (0.010438468) | No Values (0.019889135) | No Values (0.0982867567) | No Values (0.300676298334) | No Values (0.18298334) | No Values (0.01638869) | No Values (-0.124090575) | No Values (0.07178198) | Reference Missing (0.010438468) | No Values (0.019889135) | No Values (0.019889135) | 660.4  | 1318.7 | 2      | 0.0073 | 5.525 |

|                                                                              |                                                                                                                                                                                                                                         |                      |     |      |          |     |        |       |      |        |      |       |       |       |       |       |       |       |       |       |       |       |        |   |        |       |
|------------------------------------------------------------------------------|-----------------------------------------------------------------------------------------------------------------------------------------------------------------------------------------------------------------------------------------|----------------------|-----|------|----------|-----|--------|-------|------|--------|------|-------|-------|-------|-------|-------|-------|-------|-------|-------|-------|-------|--------|---|--------|-------|
| Polyadenylate-binding protein 1<br>OS=Homo sapiens<br>GN=PABPC1 PE=1<br>SV=2 | 0 PABP1_ HUMAN,s p P29341  PABP1_ MOUSE,s p P61286  PABP1_B OVIN,sp  Q5R8F7 P ABP1_PO NAB,sp Q 9EPH8 PA BP1_RAT, sp Q9H36 1 PABP3_ HUMAN,t r B3KT93  B3KT93_ HUMAN,t r B4DQX0  B4DQX0 _HUMAN, tr B4DZW 4 B4DZW 4_HUMA N,tr D2G Y31 D2GY | nFGE DMD DER         | 59% | 23.7 | 43.10226 | Ref | 0.42   | -0.1  | 0.27 | -0.098 | 0.04 | -0.12 | -0.02 | 22500 | 24000 | 18200 | 26400 | 22500 | 21600 | 20200 | 21500 | 766.3 | 1530.6 | 2 | 0.0146 | 9.544 |
| Polyadenylate-binding protein 1<br>OS=Homo sapiens<br>GN=PABPC1 PE=1<br>SV=2 | 0 PABP1_ HUMAN,s p P29341  PABP1_ MOUSE,s p P61286  PABP1_B OVIN,sp  Q5R8F7 P ABP1_PO NAB,sp Q 9EPH8 PA BP1_RAT, sp Q9H36 1 PABP3_ HUMAN,t r B3KT93  B3KT93_ HUMAN,t r B4DQX0  B4DQX0 _HUMAN, tr B4DZW 4 B4DZW 4_HUMA N,tr D2G Y31 D2GY | skVD EAV AVL QAH QAK | 90% | 44.7 | 52.09585 | Ref | -0.099 | -0.13 | 0.22 | 0.082  | 0.37 | 0.024 | 0.16  | 1440  | 1240  | 1310  | 1880  | 1880  | 2010  | 1650  | 1800  | 869.5 | 2605.5 | 3 | 0.0308 | 11.82 |

|                                                                              |                                                                                                                                                                                                                                                                                                                 |      |     |     |     |     |     |      |          |     |        |       |      |        |      |       |      |      |      |      |      |      |      |      |      |       |        |   |        |       |
|------------------------------------------------------------------------------|-----------------------------------------------------------------------------------------------------------------------------------------------------------------------------------------------------------------------------------------------------------------------------------------------------------------|------|-----|-----|-----|-----|-----|------|----------|-----|--------|-------|------|--------|------|-------|------|------|------|------|------|------|------|------|------|-------|--------|---|--------|-------|
| Polyadenylate-binding protein 1<br>OS=Homo sapiens<br>GN=PABPC1 PE=1<br>SV=2 | 0 PABP1_ HUMAN,s<br>p P29341<br> PABP1_ MOUSE,s<br>p P61286<br> PABP1_B<br>OVIN,sp <br>Q5R8F7 P<br>ABP1_PO<br>NAB,sp Q<br>9EPH8 PA<br>BP1_RAT,<br>sp Q9H36<br>1 PABP3_<br>HUMAN,t<br>r B3KT93<br> B3KT93_<br>HUMAN,t<br>r B4DQX0<br> B4DQX0<br>_HUMAN,<br>tr B4DZW<br>4 B4DZW<br>4_HUMA<br>N,tr D2G<br>Y31 D2GY | skVD | EAV | AVL | QAH | QAK | 82% | 32.8 | 51.17636 | Ref | -0.25  | -0.11 | 0.11 | 0.038  | 0.46 | 0.023 | 0.24 | 3740 | 2730 | 3260 | 4270 | 4480 | 5230 | 4040 | 4660 | 522.1 | 2605.5 | 5 | 0.0133 | 5.116 |
| Polyadenylate-binding protein 1<br>OS=Homo sapiens<br>GN=PABPC1 PE=1<br>SV=2 | 0 PABP1_ HUMAN,s<br>p P29341<br> PABP1_ MOUSE,s<br>p P61286<br> PABP1_B<br>OVIN,sp <br>Q5R8F7 P<br>ABP1_PO<br>NAB,sp Q<br>9EPH8 PA<br>BP1_RAT,<br>sp Q9H36<br>1 PABP3_<br>HUMAN,t<br>r B3KT93<br> B3KT93_<br>HUMAN,t<br>r B4DQX0<br> B4DQX0<br>_HUMAN,<br>tr B4DZW<br>4 B4DZW<br>4_HUMA<br>N,tr D2G<br>Y31 D2GY | skVD | EAV | AVL | QAH | QAK | 94% | 43.6 | 51.59763 | Ref | -0.054 | -0.04 | 0.21 | -0.017 | 0.13 | 0.071 | 0.27 | 5470 | 4540 | 4970 | 6670 | 6260 | 6040 | 6070 | 6890 | 522.1 | 2605.5 | 5 | 0.0209 | 8.032 |

|                                                                                        |                                                                                                                                                                                                                                  |                                     |            |             |                 |            |               |              |              |              |              |              |              |             |             |             |             |             |              |             |             |              |               |          |               |              |
|----------------------------------------------------------------------------------------|----------------------------------------------------------------------------------------------------------------------------------------------------------------------------------------------------------------------------------|-------------------------------------|------------|-------------|-----------------|------------|---------------|--------------|--------------|--------------|--------------|--------------|--------------|-------------|-------------|-------------|-------------|-------------|--------------|-------------|-------------|--------------|---------------|----------|---------------|--------------|
| <p>Polyadenylate-binding protein 1<br/>OS=Homo sapiens<br/>GN=PABPC1 PE=1<br/>SV=2</p> | <p>0 PABP1_HUMAN,sp P29341 PABP1_MOUSE,sp P61286 PABP1_BOVIN,sp Q5R8F7 PABP1_PONAB,sp Q9EPH8 PABP1_RAT,sp Q9H361 PABP3_HUMAN,tr B3KT93 B3KT93_HUMAN,tr B4DQX0 B4DQX0_HUMAN,tr B4DZW4 B4DZW4_HUMAN,N,tr D2GY31 D2GY</p>           | <p>skVD<br/>EAV<br/>AVL<br/>QAH</p> | <p>91%</p> | <p>41.7</p> | <p>51.06847</p> | <p>Ref</p> | <p>0.015</p>  | <p>-0.06</p> | <p>0.16</p>  | <p>0.051</p> | <p>0.34</p>  | <p>-0.12</p> | <p>0.19</p>  | <p>7750</p> | <p>6960</p> | <p>7180</p> | <p>9400</p> | <p>9570</p> | <p>10200</p> | <p>7740</p> | <p>9560</p> | <p>652.4</p> | <p>2605.5</p> | <p>4</p> | <p>0.0111</p> | <p>4.266</p> |
| <p>Vinculin OS=Sus<br/>crofa GN=VCL<br/>PE=1 SV=4</p>                                  | <p>sp P26234 VINC_PIG,sp P85972 VINC_RAT,sp Q64727 VINC_MOUSE,tr D2HEE4 D2HEE4_AILME,tr F1N789 F1N789_BOVIN,tr F1PKR3 F1PKR3_CANFA,tr F1SU37 F1SU37_PIG,tr F6ZS25 F6ZS25_HORSE,tr F6ZT22 F6ZT22_HORSE,tr F6ZT60 F6ZT60_HORSE</p> | <p>gLVA<br/>EGH<br/>R</p>           | <p>51%</p> | <p>30</p>   | <p>50.57833</p> | <p>Ref</p> | <p>-0.032</p> | <p>0.28</p>  | <p>-0.37</p> | <p>-0.3</p>  | <p>-0.48</p> | <p>0.11</p>  | <p>-0.29</p> | <p>5800</p> | <p>4710</p> | <p>6320</p> | <p>4520</p> | <p>5240</p> | <p>4050</p>  | <p>6360</p> | <p>4770</p> | <p>381.6</p> | <p>1141.6</p> | <p>3</p> | <p>0.0079</p> | <p>6.941</p> |

|                                               |                                                                                                                                                                                                                           |                         |     |      |          |     |       |      |       |       |       |      |       |       |       |       |       |       |       |       |       |       |        |   |        |       |
|-----------------------------------------------|---------------------------------------------------------------------------------------------------------------------------------------------------------------------------------------------------------------------------|-------------------------|-----|------|----------|-----|-------|------|-------|-------|-------|------|-------|-------|-------|-------|-------|-------|-------|-------|-------|-------|--------|---|--------|-------|
| Vinculin OS=Sus<br>scrofa GN=VCL<br>PE=1 SV=4 | sp P26234 VINC_PIG,sp P85972 VINC_RAT,sp Q64727 VINC_MOUSE,tr D2HEE4 D2HEE4_AILME,tr F1N789 F1N789_BOVIN,tr F1PKR3 F1PKR3_CANFA,tr F1SU37 F1SU37_PIG,tr F6ZS25 F6ZS25_HORSE,tr F6ZT22 F6ZT22_HORSE,tr F6ZT60 F6ZT60_HORSE | gQG<br>ASPV<br>AMQ<br>k | 72% | 36.8 | 53.11048 | Ref | -0.41 | 0.46 | -0.34 | -0.2  | -0.51 | 0.23 | -0.23 | 15800 | 11300 | 22400 | 14500 | 17500 | 12400 | 21500 | 15600 | 561.3 | 1680.9 | 3 | 0.0245 | 14.59 |
| Vinculin OS=Sus<br>scrofa GN=VCL<br>PE=1 SV=4 | sp P26234 VINC_PIG,sp P85972 VINC_RAT,sp Q64727 VINC_MOUSE,tr D2HEE4 D2HEE4_AILME,tr F1N789 F1N789_BOVIN,tr F1PKR3 F1PKR3_CANFA,tr F1SU37 F1SU37_PIG,tr F6ZS25 F6ZS25_HORSE,tr F6ZT22 F6ZT22_HORSE,tr F6ZT60 F6ZT60_HORSE | iLLV<br>Ak              | 76% | 24.3 | 39.509   | Ref | -0.7  | 0.54 | -0.62 | -0.16 | -1    | 0.82 | -0.95 | 2360  | 1210  | 3110  | 1560  | 2370  | 1150  | 4250  | 1240  | 422.3 | 1263.9 | 3 | 0.0209 | 16.49 |

|                                               |                                                                                                                                                                                                                           |                    |     |      |          |     |       |      |       |        |       |       |       |       |      |       |       |       |       |       |       |       |        |   |        |       |
|-----------------------------------------------|---------------------------------------------------------------------------------------------------------------------------------------------------------------------------------------------------------------------------|--------------------|-----|------|----------|-----|-------|------|-------|--------|-------|-------|-------|-------|------|-------|-------|-------|-------|-------|-------|-------|--------|---|--------|-------|
| Vinculin OS=Sus<br>scrofa GN=VCL<br>PE=1 SV=4 | sp P26234 VINC_PIG,sp P85972 VINC_RAT,sp Q64727 VINC_MOUSE,tr D2HEE4 D2HEE4_AILME,tr F1N789 F1N789_BOVIN,tr F1PKR3 F1PKR3_CANFA,tr F1SU37 F1SU37_PIG,tr F6ZS25 F6ZS25_HORSE,tr F6ZT22 F6ZT22_HORSE,tr F6ZT60 F6ZT60_HORSE | iLLV<br>AK         | 89% | 27   | 35.41829 | Ref | -0.64 | 0.54 | -0.63 | -0.077 | -0.68 | 0.67  | -0.88 | 3820  | 2170 | 5330  | 2660  | 4310  | 2470  | 6610  | 2240  | 422.3 | 1263.9 | 3 | 0.0097 | 7.663 |
| Vinculin OS=Sus<br>scrofa GN=VCL<br>PE=1 SV=4 | sp P26234 VINC_PIG,sp P85972 VINC_RAT,sp Q64727 VINC_MOUSE,tr D2HEE4 D2HEE4_AILME,tr F1N789 F1N789_BOVIN,tr F1PKR3 F1PKR3_CANFA,tr F1SU37 F1SU37_PIG,tr F6ZS25 F6ZS25_HORSE,tr F6ZT22 F6ZT22_HORSE,tr F6ZT60 F6ZT60_HORSE | qQEL<br>THQ<br>EHR | 90% | 43.6 | 51.67696 | Ref | -0.42 | 0.1  | -0.13 | -0.25  | -0.11 | 0.091 | -0.12 | 12100 | 8330 | 13000 | 12400 | 12500 | 12100 | 14500 | 12400 | 537.3 | 1608.8 | 3 | 0.0174 | 10.81 |

|                                                                          |                                                                                                                                                                                                                         |                     |     |      |          |     |       |       |       |        |       |       |       |       |       |       |       |       |       |       |       |       |        |   |        |       |
|--------------------------------------------------------------------------|-------------------------------------------------------------------------------------------------------------------------------------------------------------------------------------------------------------------------|---------------------|-----|------|----------|-----|-------|-------|-------|--------|-------|-------|-------|-------|-------|-------|-------|-------|-------|-------|-------|-------|--------|---|--------|-------|
| Vinculin OS=Sus<br>scrofa GN=VCL<br>PE=1 SV=4                            | sp P26234 VINC_PIG,sp P85972 VINC_RAT,sp Q64727 VINC_MOUSE,tr D2HEE4 D2HEE4_AILME,tr F1N789 F1N789_BOVIN,tr F1PKR3 F1PKR3_CANFA,tr F1SU37 F1SU37_PIG,tr F6ZS25 F6ZS25_HORSE,tr F6ZT22 F6ZT22_HORSE,tr F6ZT60 F6ZT60_HO  | qQEL<br>THQ<br>EHR  | 91% | 42.4 | 51.85825 | Ref | -0.79 | 0.56  | -0.88 | -0.084 | -0.71 | 0.78  | -0.88 | 2390  | 1180  | 3250  | 1340  | 2570  | 1450  | 4280  | 1340  | 805.4 | 1608.8 | 2 | 0.0132 | 8.174 |
| 40S ribosomal<br>protein S23<br>OS=Homo sapiens<br>GN=RPS23 PE=1<br>SV=3 | 6 RS23_HUMAN,sp P62267 RS23_MOUSE,sp P62268 RS23_RAT,sp P62298 RS23_CHILA,sp Q3T199 RS23_BOVIN,sp Q6SA96 RS23_PIG,tr A8K517 A8K517_HUMAN,tr D2H3P7 D2H3P7_AILME,tr D3YXF9 D3YXF9_MOUSE,tr E1B8G4 E1B8G4_BOVIN,tr E1BAM7 | aNPF<br>GGA<br>SHAK | 89% | 44.3 | 52.98546 | Ref | 0.18  | -0.24 | 0.23  | -0.11  | 0.27  | -0.27 | 0.26  | 31600 | 29600 | 24100 | 37400 | 32600 | 36900 | 26600 | 38200 | 555.6 | 1663.9 | 3 | 0.018  | 10.84 |



|                                                                       |                                                                                                                                                                                                                                                                                                                                 |                     |     |      |          |     |      |       |      |        |      |       |      |      |      |      |       |      |       |      |       |       |        |   |        |       |
|-----------------------------------------------------------------------|---------------------------------------------------------------------------------------------------------------------------------------------------------------------------------------------------------------------------------------------------------------------------------------------------------------------------------|---------------------|-----|------|----------|-----|------|-------|------|--------|------|-------|------|------|------|------|-------|------|-------|------|-------|-------|--------|---|--------|-------|
| 40S ribosomal protein S23<br>OS=Homo sapiens<br>GN=RPS23 PE=1<br>SV=3 | 6 RS23_H<br>UMAN,sp<br> P62267 <br>RS23_MO<br>USE,sp P6<br>2268 RS2<br>3_RAT,sp<br> P62298 <br>RS23_CHI<br>LA,sp Q3<br>T199 RS2<br>3_BOVIN,<br>sp Q6SA9<br>6 RS23_P<br>IG,tr A8K<br>517 A8K5<br>17_HUMA<br>N,tr D2H<br>3P7 D2H3<br>P7_AILME<br>,tr D3YXF<br>9 D3YXF9<br>_MOUSE,t<br>r E1B8G4<br> E1B8G4_<br>BOVIN,tr <br>E1BAM7 | aNPF<br>GGA<br>SHAk | 91% | 43.5 | 52.97973 | Ref | 0.15 | -0.38 | 0.37 | -0.038 | 0.24 | -0.21 | 0.21 | 3890 | 3760 | 2810 | 5340  | 4420 | 4700  | 3580 | 4770  | 833   | 1663.9 | 2 | 0.0172 | 10.32 |
| 40S ribosomal protein S23<br>OS=Homo sapiens<br>GN=RPS23 PE=1<br>SV=3 | 6 RS23_H<br>UMAN,sp<br> P62267 <br>RS23_MO<br>USE,sp P6<br>2268 RS2<br>3_RAT,sp<br> P62298 <br>RS23_CHI<br>LA,sp Q3<br>T199 RS2<br>3_BOVIN,<br>sp Q6SA9<br>6 RS23_P<br>IG,tr A8K<br>517 A8K5<br>17_HUMA<br>N,tr D2H<br>3P7 D2H3<br>P7_AILME<br>,tr D3YXF<br>9 D3YXF9<br>_MOUSE,t<br>r E1B8G4<br> E1B8G4_<br>BOVIN,tr <br>E1BAM7 | g VL<br>Ek          | 62% | 30.1 | 48.69683 | Ref | 0.14 | -0.41 | 0.39 | -0.13  | 0.35 | -0.37 | 0.3  | 7820 | 7460 | 5530 | 10800 | 8310 | 10100 | 6420 | 10200 | 422.9 | 1265.8 | 3 | 0.0204 | 16.14 |

|                                                                       |                                                                                                                                                                                                                                                                                                                                 |                     |     |      |          |     |     |       |      |       |       |       |      |       |       |       |       |       |       |       |       |       |        |   |        |       |
|-----------------------------------------------------------------------|---------------------------------------------------------------------------------------------------------------------------------------------------------------------------------------------------------------------------------------------------------------------------------------------------------------------------------|---------------------|-----|------|----------|-----|-----|-------|------|-------|-------|-------|------|-------|-------|-------|-------|-------|-------|-------|-------|-------|--------|---|--------|-------|
| 40S ribosomal protein S23<br>OS=Homo sapiens<br>GN=RPS23 PE=1<br>SV=3 | 6 RS23_H<br>UMAN,sp<br> P62267 <br>RS23_MO<br>USE,sp P6<br>2268 RS2<br>3_RAT,sp<br> P62298 <br>RS23_CHI<br>LA,sp Q3<br>T199 RS2<br>3_BOVIN,<br>sp Q6SA9<br>6 RS23_P<br>IG,tr A8K<br>517 A8K5<br>17_HUMA<br>N,tr D2H<br>3P7 D2H3<br>P7_AILME<br>,tr D3YXF<br>9 D3YXF9<br>_MOUSE,t<br>r E1B8G4<br> E1B8G4_<br>BOVIN,tr <br>E1BAM7 | gIVL<br>Ek          | 55% | 28.1 | 48.21343 | Ref | 0.2 | -0.3  | 0.23 | -0.13 | 0.23  | -0.09 | 0.25 | 13600 | 13500 | 10400 | 16900 | 14400 | 16200 | 13600 | 17000 | 633.9 | 1265.8 | 2 | 0.0035 | 2.777 |
| 40S ribosomal protein S23<br>OS=Homo sapiens<br>GN=RPS23 PE=1<br>SV=3 | 6 RS23_H<br>UMAN,sp<br> P62267 <br>RS23_MO<br>USE,sp P6<br>2268 RS2<br>3_RAT,sp<br> P62298 <br>RS23_CHI<br>LA,sp Q3<br>T199 RS2<br>3_BOVIN,<br>sp Q6SA9<br>6 RS23_P<br>IG,tr A8K<br>517 A8K5<br>17_HUMA<br>N,tr D2H<br>3P7 D2H3<br>P7_AILME<br>,tr D3YXF<br>9 D3YXF9<br>_MOUSE,t<br>r E1B8G4<br> E1B8G4_<br>BOVIN,tr <br>E1BAM7 | VAN<br>VSLL<br>ALYK | 95% | 54.7 | 48.58501 | Ref | 0.5 | -0.52 | 0.38 | -0.18 | 0.025 | -0.09 | 0.22 | 4810  | 6330  | 3400  | 7100  | 5310  | 5340  | 5150  | 6320  | 600.4 | 1798.1 | 3 | 0.0153 | 8.502 |

|                                                                       |                                                                                                                                                                                                                                                                                                                                               |     |      |          |     |       |       |       |        |       |       |       |       |       |       |       |       |       |       |       |       |        |   |        |       |
|-----------------------------------------------------------------------|-----------------------------------------------------------------------------------------------------------------------------------------------------------------------------------------------------------------------------------------------------------------------------------------------------------------------------------------------|-----|------|----------|-----|-------|-------|-------|--------|-------|-------|-------|-------|-------|-------|-------|-------|-------|-------|-------|-------|--------|---|--------|-------|
| 40S ribosomal protein S23<br>OS=Homo sapiens<br>GN=RPS23 PE=1<br>SV=3 | 6 RS23_H<br>UMAN,sp<br> P62267 <br>RS23_MO<br>USE,sp P6<br>2268 RS2<br>3_RAT,sp<br> P62298 <br>RS23_CHI<br>LA,sp Q3<br>T199 RS2<br>3_BOVIN,<br>sp Q6SA9<br>6 RS23_P<br>IG,tr A8K<br>517 A8K5<br>17_HUMA<br>N,tr D2H<br>3P7 D2H3<br>P7_AILME<br>,tr D3YXF<br>9 D3YXF9<br>_MOUSE,t<br>r E1B8G4<br> E1B8G4_ VAN<br>BOVIN,tr  VSL<br>E1BAM7  ALYK | 95% | 51.4 | 48.5561  | Ref | 0.36  | -0.39 | 0.39  | -0.17  | 0.2   | -0.12 | 0.25  | 8230  | 10700 | 6940  | 13300 | 9950  | 11300 | 9390  | 12100 | 600.4 | 1798.1 | 3 | 0.0148 | 8.202 |
| LDLR chaperone<br>MESD OS=Bos<br>taurus GN=MESDC2<br>PE=2 SV=1        | sp Q3T0U<br>1 MESD_<br>BOVIN,tr  cAD<br>F1RIE0 F1 VTLE<br>RIE0_PIG GQV<br>YPGk                                                                                                                                                                                                                                                                | 95% | 52.5 | 53.73171 | Ref | 0.19  | -0.07 | 0.15  | -0.068 | 0.025 | 0.23  | 0.1   | 5250  | 5130  | 4640  | 6090  | 5760  | 5360  | 6470  | 5870  | 712   | 2133.1 | 3 | 0.0226 | 10.6  |
| LDLR chaperone<br>MESD OS=Bos<br>taurus GN=MESDC2<br>PE=2 SV=1        | sp Q3T0U<br>1 MESD_<br>BOVIN,tr  cAD<br>F1RIE0 F1 VTLE<br>RIE0_PIG GQV<br>YPGk                                                                                                                                                                                                                                                                | 55% | 33.9 | 53.81357 | Ref | 0.45  | 0.051 | -0.03 | -0.033 | -0.04 | -0    | -0.01 | 7760  | 8230  | 6780  | 7210  | 7910  | 6900  | 7370  | 7270  | 712   | 2133.1 | 3 | 0.019  | 8.885 |
| LDLR chaperone<br>MESD OS=Bos<br>taurus GN=MESDC2<br>PE=2 SV=1        | sp Q3T0U<br>1 MESD_<br>BOVIN,tr  dYN<br>F1RIE0 F1 DAD<br>RIE0_PIG MAR                                                                                                                                                                                                                                                                         | 85% | 32.2 | 44.96418 | Ref | 0.014 | 0.081 | 0.16  | -0.057 | 0.28  | -0.07 | 0.32  | 30100 | 30000 | 34200 | 40400 | 38400 | 42300 | 34800 | 45200 | 687.8 | 1373.6 | 2 | 0.0119 | 8.686 |

|                                                                                       |                                                                                                                                                                                          |                                       |     |      |          |     |        |       |       |        |       |       |       |       |       |       |       |       |       |       |       |       |        |   |        |       |
|---------------------------------------------------------------------------------------|------------------------------------------------------------------------------------------------------------------------------------------------------------------------------------------|---------------------------------------|-----|------|----------|-----|--------|-------|-------|--------|-------|-------|-------|-------|-------|-------|-------|-------|-------|-------|-------|-------|--------|---|--------|-------|
| LDLR chaperone<br>MESD OS=Bos<br>taurus GN=MESDC2<br>PE=2 SV=1                        | sp Q3T0U1 MESD_BOVIN, tr F1RIE0 F1RIE0_PIG                                                                                                                                               | dYNDADmAR                             | 85% | 31.6 | 44.27145 | Ref | 0.11   | 0.17  | -0.1  | -0.018 | 0.34  | -0.16 | 0.34  | 6720  | 7030  | 7980  | 7430  | 8660  | 9710  | 7150  | 10000 | 695.8 | 1389.6 | 2 | 0.0128 | 9.2   |
| LDLR chaperone<br>MESD OS=Bos<br>taurus GN=MESDC2<br>PE=2 SV=1                        | sp Q3T0U1 MESD_BOVIN, tr F1RIE0 F1RIE0_PIG                                                                                                                                               | rPSA<br>PIDF<br>SQID<br>PGkP<br>ESILk | 75% | 34.6 | 52.0594  | Ref | -0.083 | 0.068 | 0.32  | 0.028  | 0.29  | -0.11 | 0.073 | 2360  | 1970  | 2370  | 3160  | 2850  | 2980  | 2360  | 2660  | 802.7 | 3206.8 | 4 | 0.0218 | 6.809 |
| LDLR chaperone<br>MESD OS=Bos<br>taurus GN=MESDC2<br>PE=2 SV=1                        | sp Q3T0U1 MESD_BOVIN, tr F1RIE0 F1RIE0_PIG                                                                                                                                               | rPSA<br>PIDF<br>SQID<br>PGkP<br>ESILk | 64% | 28.9 | 52.44492 | Ref | 0.14   | -0.1  | 0.052 | -0.024 | 0.028 | 0.043 | 0.37  | 1670  | 1530  | 1400  | 1750  | 1830  | 1650  | 1750  | 2170  | 642.4 | 3206.8 | 5 | 0.0306 | 9.542 |
| Peptidyl-prolyl cis-trans isomerase<br>FKBP1A OS=Bos<br>taurus GN=FKBP1A<br>PE=1 SV=2 | sp P18203 FKB1A_BOVIN, sp P26883 FKB1A_MOUSE, sp P62942 FKB1A_HUMAN, sp P62943 FKB1A_RABIT, tr A2AT05 A2AT05_MOUSE, tr F7GBW1 F7GBW1_MACMU, tr Q2VTP6 Q2VTP6_PIG, tr Q3ULN5 Q3ULN5_MOUSE | gVQ<br>VETI<br>SPG<br>DGR             | 95% | 67.9 | 52.39512 | Ref | -0.11  | -0.23 | -0.05 | -0.011 | 0.35  | -0.62 | 0.014 | 54200 | 43100 | 43000 | 54600 | 62000 | 69500 | 36900 | 57100 | 809.9 | 1617.9 | 2 | 0.0124 | 7.673 |

|                                                                                 |                                                                                                                                                                                       |               |     |      |          |     |       |       |       |       |       |       |       |       |       |       |       |       |       |       |       |       |        |   |        |       |
|---------------------------------------------------------------------------------|---------------------------------------------------------------------------------------------------------------------------------------------------------------------------------------|---------------|-----|------|----------|-----|-------|-------|-------|-------|-------|-------|-------|-------|-------|-------|-------|-------|-------|-------|-------|-------|--------|---|--------|-------|
| Peptidyl-prolyl cis-trans isomerase<br>FKBP1A OS=Bos taurus GN=FKBP1A PE=1 SV=2 | sp P18203 FKB1A_BOVIN,sp P26883 FKB1A_MOUSE,sp P62942 FKB1A_HUMAN,sp P62943 FKB1A_RABIT, tr A2AT05 A2AT05_MOUSE, tr F7GBW1 F7GBW1_MACMU, tr Q2VTP6 Q2VTP6_PIG, tr Q3ULN5 Q3ULN5_MOUSE | gVQVETISPGDGR | 63% | 33.6 | 52.39512 | Ref | -0.26 | -0.1  | 0.067 | 0.095 | 0.33  | -0.56 | -0.04 | 32100 | 26100 | 31800 | 40000 | 44900 | 46000 | 26100 | 37000 | 809.9 | 1617.9 | 2 | 0.0124 | 7.673 |
| Peptidyl-prolyl cis-trans isomerase<br>FKBP1A OS=Bos taurus GN=FKBP1A PE=1 SV=2 | sp P18203 FKB1A_BOVIN,sp P26883 FKB1A_MOUSE,sp P62942 FKB1A_HUMAN,sp P62943 FKB1A_RABIT, tr A2AT05 A2AT05_MOUSE, tr F7GBW1 F7GBW1_MACMU, tr Q2VTP6 Q2VTP6_PIG, tr Q3ULN5 Q3ULN5_MOUSE | gVQVETISPGDGR | 91% | 45.3 | 52.40619 | Ref | -0.18 | 4E-04 | -0.23 | 0.11  | 0.055 | -0.15 | 0.034 | 42700 | 36100 | 44500 | 42500 | 59300 | 49900 | 45300 | 51000 | 540.3 | 1617.9 | 3 | 0.0103 | 6.336 |

|                                                                                 |                                                                                                                                                                                       |                                |     |      |          |     |       |       |       |       |       |       |       |       |       |       |       |       |       |       |       |       |        |   |        |       |
|---------------------------------------------------------------------------------|---------------------------------------------------------------------------------------------------------------------------------------------------------------------------------------|--------------------------------|-----|------|----------|-----|-------|-------|-------|-------|-------|-------|-------|-------|-------|-------|-------|-------|-------|-------|-------|-------|--------|---|--------|-------|
| Peptidyl-prolyl cis-trans isomerase<br>FKBP1A OS=Bos taurus GN=FKBP1A PE=1 SV=2 | sp P18203 FKB1A_BOVIN,sp P26883 FKB1A_MOUSE,sp P62942 FKB1A_HUMAN,sp P62943 FKB1A_RABIT, tr A2AT05 A2AT05_MOUSE, tr F7GBW1 F7GBW1_MACMU, tr Q2VTP6 Q2VTP6_PIG, tr Q3ULN5 Q3ULN5_MOUSE | gWE<br>EGV<br>AQM<br>SVG<br>QR | 95% | 51.5 | 51.62445 | Ref | 0.024 | -0.18 | -0.04 | 0.005 | 0.37  | -0.74 | -0.14 | 15200 | 13300 | 12600 | 15400 | 17600 | 19800 | 9600  | 14400 | 919.5 | 1836.9 | 2 | 0.0146 | 7.96  |
| Peptidyl-prolyl cis-trans isomerase<br>FKBP1A OS=Bos taurus GN=FKBP1A PE=1 SV=2 | sp P18203 FKB1A_BOVIN,sp P26883 FKB1A_MOUSE,sp P62942 FKB1A_HUMAN,sp P62943 FKB1A_RABIT, tr A2AT05 A2AT05_MOUSE, tr F7GBW1 F7GBW1_MACMU, tr Q2VTP6 Q2VTP6_PIG, tr Q3ULN5 Q3ULN5_MOUSE | gWE<br>EGV<br>AQM<br>SVG<br>QR | 94% | 46.2 | 51.67303 | Ref | 0.17  | -0.19 | 0.13  | -0.19 | -0.02 | -0.53 | -0.05 | 18600 | 17000 | 14400 | 20200 | 17800 | 17600 | 12800 | 17800 | 919.5 | 1836.9 | 2 | 0.0135 | 7.362 |

|                                                                              |                                                                                                                                                                                       |                                |     |      |          |     |                             |      |       |       |       |       |       |       |      |       |        |        |       |       |        |       |        |   |        |       |
|------------------------------------------------------------------------------|---------------------------------------------------------------------------------------------------------------------------------------------------------------------------------------|--------------------------------|-----|------|----------|-----|-----------------------------|------|-------|-------|-------|-------|-------|-------|------|-------|--------|--------|-------|-------|--------|-------|--------|---|--------|-------|
| Peptidyl-prolyl cis-trans isomerase FKBP1A OS=Bos taurus GN=FKBP1A PE=1 SV=2 | sp P18203 FKB1A_BOVIN,sp P26883 FKB1A_MOUSE,sp P62942 FKB1A_HUMAN,sp P62943 FKB1A_RABIT, tr A2AT05 A2AT05_MOUSE, tr F7GBW1 F7GBW1_MACMU, tr Q2VTP6 Q2VTP6_PIG, tr Q3ULN5 Q3ULN5_MOUSE | gWE<br>EGV<br>AQM<br>SVG<br>QR | 92% | 42.6 | 51.26222 | Ref | -0.15                       | -0.1 | 0.077 | -0.04 | 0.083 | -0.23 | -0.12 | 2380  | 1880 | 2110  | 2680   | 2720   | 2590  | 2180  | 2330   | 919.5 | 1836.9 | 2 | 0.0211 | 11.47 |
| 60S ribosomal protein L4 OS=Canis familiaris GN=RPL4 PE=1 SV=2               | sp Q28346 RL4_CANFA,sp Q58DW0 R L4_BOVIN, tr E2R546 E2R546_CANFA, tr F1PD88 F1PD88_CANFA, tr F1PVZ2 F1PVZ2_CANFA, tr F6VX41 F6VX41_HORSE                                              | aAA<br>ALEA<br>k               | 90% | 42.3 | 49.87764 | Ref | Value Missing (-0.12980463) | 0.15 | -0.02 | 0.009 | 0.1   | -0.07 | -0.06 | 1E+05 | 63   | 1E+05 | 105000 | 119000 | 1E+05 | 1E+05 | 102000 | 451.6 | 1351.8 | 3 | 0.0034 | 2.498 |

|                                                                |                                                                                                                                         |                   |     |      |          |     |       |       |       |        |       |       |       |       |       |       |        |       |       |       |       |       |        |   |        |       |
|----------------------------------------------------------------|-----------------------------------------------------------------------------------------------------------------------------------------|-------------------|-----|------|----------|-----|-------|-------|-------|--------|-------|-------|-------|-------|-------|-------|--------|-------|-------|-------|-------|-------|--------|---|--------|-------|
| 60S ribosomal protein L4 OS=Canis familiaris GN=RPL4 PE=1 SV=2 | sp Q28346 RL4_CANFA,sp Q58DW0 RL4_BOVIN, tr E2R546 E2R546_CANFA, tr F1PD88 F1PD88_CANFA, tr F1PVZ2 F1PVZ2_CANFA, tr F6VX41 F6VX41_HORSE | aAA<br>ALEA<br>k  | 90% | 42.4 | 49.87764 | Ref | 0.035 | -0.14 | 0.21  | -0.084 | 0.1   | 0.087 | 0.082 | 69000 | 73600 | 70900 | 101000 | 91000 | 90400 | 93400 | 92400 | 451.6 | 1351.8 | 3 | 0.0034 | 2.498 |
| 60S ribosomal protein L4 OS=Canis familiaris GN=RPL4 PE=1 SV=2 | sp Q28346 RL4_CANFA,sp Q58DW0 RL4_BOVIN, tr E2R546 E2R546_CANFA, tr F1PD88 F1PD88_CANFA, tr F1PVZ2 F1PVZ2_CANFA, tr F6VX41 F6VX41_HORSE | nVTL<br>PAVF<br>k | 74% | 34.2 | 49.97496 | Ref | 0.09  | -0.03 | 0.049 | -0.15  | 0.054 | -0.11 | 0.17  | 4280  | 3980  | 3970  | 4710   | 4510  | 4550  | 4250  | 5100  | 533   | 1596   | 3 | 0.0099 | 6.182 |
| 60S ribosomal protein L4 OS=Canis familiaris GN=RPL4 PE=1 SV=2 | sp Q28346 RL4_CANFA,sp Q58DW0 RL4_BOVIN, tr E2R546 E2R546_CANFA, tr F1PD88 F1PD88_CANFA, tr F1PVZ2 F1PVZ2_CANFA, tr F6VX41 F6VX41_HORSE | nVTL<br>PAVF<br>k | 75% | 34   | 50.10533 | Ref | 0.025 | -0.02 | 0.17  | -0.092 | 0.001 | -0.05 | -0    | 7680  | 6580  | 6900  | 8860   | 8140  | 7580  | 7660  | 7830  | 799   | 1596   | 2 | 0.0114 | 7.167 |



|                                                                |                                                                                                                                     |                   |     |      |          |     |       |       |      |       |       |       |       |       |       |       |       |       |       |       |       |       |        |   |        |       |
|----------------------------------------------------------------|-------------------------------------------------------------------------------------------------------------------------------------|-------------------|-----|------|----------|-----|-------|-------|------|-------|-------|-------|-------|-------|-------|-------|-------|-------|-------|-------|-------|-------|--------|---|--------|-------|
| 60S ribosomal protein L4 OS=Canis familiaris GN=RPL4 PE=1 SV=2 | sp Q28346 RL4_CANFA,sp Q58DW0 RL4_BOVIN,tr E2R546 E2R546_CANFA,tr F1PD88 F1PD88_CANFA,tr F1PVZ2 F1PVZ2_CANFA,tr F6VX41 F6VX41_HORSE | nVTL<br>PAVFK     | 82% | 37.3 | 49.96201 | Ref | 0.028 | -0.1  | 0.19 | 0.03  | 0.076 | -0.14 | -0.03 | 4340  | 3830  | 3800  | 5210  | 5140  | 4630  | 4160  | 4480  | 533   | 1596   | 3 | 0.0033 | 2.049 |
| 60S ribosomal protein L4 OS=Canis familiaris GN=RPL4 PE=1 SV=2 | sp Q28346 RL4_CANFA,sp Q58DW0 RL4_BOVIN,tr E2R546 E2R546_CANFA,tr F1PD88 F1PD88_CANFA,tr F1PVZ2 F1PVZ2_CANFA,tr F6VX41 F6VX41_HORSE | sNYN<br>LPM<br>HK | 62% | 34.3 | 52.96731 | Ref | 0.11  | -0.21 | 0.18 | -0.11 | 0.18  | -0.14 | 0.17  | 39700 | 41200 | 36000 | 52900 | 47700 | 50800 | 42500 | 52300 | 571.3 | 1710.9 | 3 | 0.0057 | 3.343 |

|                                                                                  |                                                                                                                                                                                                                                         |                       |     |      |          |     |      |       |       |        |       |       |       |       |       |       |       |       |       |       |       |       |        |   |        |       |
|----------------------------------------------------------------------------------|-----------------------------------------------------------------------------------------------------------------------------------------------------------------------------------------------------------------------------------------|-----------------------|-----|------|----------|-----|------|-------|-------|--------|-------|-------|-------|-------|-------|-------|-------|-------|-------|-------|-------|-------|--------|---|--------|-------|
| 26S proteasome non-ATPase regulatory subunit 7 OS=Mus musculus GN=Psm7 PE=1 SV=2 | 6 PSD7_MOUSE,s p P51665  PSD7_H UMAN,sp  Q3ZBD0  PSD7_B OVIN,tr A 1L3B8 A1 L3B8_MO USE,tr A1 L5B1 A1L 5B1_BOVI N,tr B2R D27 B2R D27_HU MAN,tr D 4AEH3 D 4AEH3_R AT,tr E2R BA7 E2RB A7_CANF A,tr F6TS 39 F6TS3 9_MACM U,tr F7E7 72 F7E77 | ITNQ VHG Lk           | 71% | 33.9 | 50.39224 | Ref | 0.15 | -0.08 | 0.073 | -0.083 | 0.074 | -0.09 | 0.027 | 23400 | 22400 | 20700 | 25900 | 25600 | 24900 | 23200 | 25000 | 540   | 1617   | 3 | 0.0109 | 6.75  |
| 26S proteasome non-ATPase regulatory subunit 7 OS=Mus musculus GN=Psm7 PE=1 SV=2 | 6 PSD7_MOUSE,s p P51665  PSD7_H UMAN,sp  Q3ZBD0  PSD7_B OVIN,tr A 1L3B8 A1 L3B8_MO USE,tr A1 L5B1 A1L 5B1_BOVI N,tr B2R D27 B2R D27_HU MAN,tr D 4AEH3 D 4AEH3_R AT,tr E2R BA7 E2RB A7_CANF A,tr F6TS 39 F6TS3 9_MACM U,tr F7E7 72 F7E77 | vVV HPLV LLSV VDH FNR | 94% | 46.9 | 51.64329 | Ref | 0.44 | -0.28 | -0.06 | 0.14   | -0.15 | -0.11 | -0.1  | 555   | 617   | 409   | 532   | 677   | 482   | 518   | 519   | 562.6 | 2246.3 | 4 | 0.0131 | 5.808 |



|                                                                                  |                                                                                                                                                                                                                                                                                                                    |                                   |     |      |          |     |      |       |       |       |       |       |       |     |     |     |     |     |     |     |     |       |        |   |        |       |
|----------------------------------------------------------------------------------|--------------------------------------------------------------------------------------------------------------------------------------------------------------------------------------------------------------------------------------------------------------------------------------------------------------------|-----------------------------------|-----|------|----------|-----|------|-------|-------|-------|-------|-------|-------|-----|-----|-----|-----|-----|-----|-----|-----|-------|--------|---|--------|-------|
| 26S proteasome non-ATPase regulatory subunit 7 OS=Mus musculus GN=Psm7 PE=1 SV=2 | 6 PSD7_MOUSE,s<br>p P51665<br> PSD7_H<br>UMAN,sp<br> Q3ZBD0<br> PSD7_B<br>OVIN,tr A<br>1L3B8 A1<br>L3B8_MO<br>USE,tr A1<br>L5B1 A1L<br>5B1_BOVI<br>N,tr B2R<br>D27 B2R<br>D27_HU<br>MAN,tr D<br>4AEH3 D<br>4AEH3_R<br>AT,tr E2R<br>BA7 E2RB<br>A7_CANF<br>A,tr F6TS<br>39 F6TS3<br>9_MACM<br>U,tr F7E7<br>72 F7E77 | vVV<br>HPLV<br>LLSV<br>VDH<br>FNR | 78% | 34.8 | 51.36479 | Ref | 0.41 | -0.29 | -0.01 | 0.16  | -0.07 | -0.08 | -0.13 | 377 | 438 | 292 | 398 | 493 | 369 | 383 | 366 | 562.6 | 2246.3 | 4 | 0.0084 | 3.743 |
| 26S proteasome non-ATPase regulatory subunit 7 OS=Mus musculus GN=Psm7 PE=1 SV=2 | 6 PSD7_MOUSE,s<br>p P51665<br> PSD7_H<br>UMAN,sp<br> Q3ZBD0<br> PSD7_B<br>OVIN,tr A<br>1L3B8 A1<br>L3B8_MO<br>USE,tr A1<br>L5B1 A1L<br>5B1_BOVI<br>N,tr B2R<br>D27 B2R<br>D27_HU<br>MAN,tr D<br>4AEH3 D<br>4AEH3_R<br>AT,tr E2R<br>BA7 E2RB<br>A7_CANF<br>A,tr F6TS<br>39 F6TS3<br>9_MACM<br>U,tr F7E7<br>72 F7E77 | vVV<br>HPLV<br>LLSV<br>VDH<br>FNR | 66% | 31.7 | 51.15767 | Ref | 0.19 | -0.23 | 0.1   | -0.11 | 0.31  | -0.08 | -0.22 | 201 | 191 | 155 | 219 | 209 | 244 | 194 | 175 | 562.6 | 2246.3 | 4 | 0.0035 | 1.572 |

|                                                            |                                                                                                                                                                                                                    |              |     |      |          |     |      |       |      |      |      |      |      |      |      |      |       |      |      |      |      |     |      |   |        |       |
|------------------------------------------------------------|--------------------------------------------------------------------------------------------------------------------------------------------------------------------------------------------------------------------|--------------|-----|------|----------|-----|------|-------|------|------|------|------|------|------|------|------|-------|------|------|------|------|-----|------|---|--------|-------|
| 40S ribosomal protein S17 OS=Bos taurus GN=RPS17 PE=2 SV=1 | 3 RS17_BOVIN,sp P04644 RS17_RAT,sp P08708 RS17_HUMAN,sp POCW22 RS17L_HUMAN,sp P63273 RS17_CANFA,sp P63274 RS17_CRIGR,sp P63275 RS17_FELCA,sp P63276 RS17_MOUSE,sp Q6QAP7 RS17_PIG,tr A4D1Q6 A4D1Q6_HUMAN,tr D2HD06 | iAGY VTHL Mk | 63% | 33.7 | 52.07667 | Ref | 0.15 | -0.04 | 0.54 | 0.2  | 0.45 | 0.24 | 0.37 | 6600 | 6280 | 5980 | 10000 | 8750 | 9030 | 8210 | 8890 | 581 | 1740 | 3 | 0.0088 | 5.038 |
| 40S ribosomal protein S17 OS=Bos taurus GN=RPS17 PE=2 SV=1 | 3 RS17_BOVIN,sp P04644 RS17_RAT,sp P08708 RS17_HUMAN,sp POCW22 RS17L_HUMAN,sp P63273 RS17_CANFA,sp P63274 RS17_CRIGR,sp P63275 RS17_FELCA,sp P63276 RS17_MOUSE,sp Q6QAP7 RS17_PIG,tr A4D1Q6 A4D1Q6_HUMAN,tr D2HD06 | iAGY VTHL Mk | 95% | 49.9 | 52.26474 | Ref | 0.15 | 0.002 | 0.51 | 0.17 | 0.5  | 0.14 | 0.43 | 1540 | 1460 | 1430 | 2280  | 1980 | 2170 | 1770 | 2150 | 871 | 1740 | 2 | 0.0169 | 9.727 |

|                                                            |                                                                                                                                                                                                                    |              |     |      |          |     |      |       |      |      |      |      |      |       |       |       |       |       |       |       |       |     |      |   |        |       |
|------------------------------------------------------------|--------------------------------------------------------------------------------------------------------------------------------------------------------------------------------------------------------------------|--------------|-----|------|----------|-----|------|-------|------|------|------|------|------|-------|-------|-------|-------|-------|-------|-------|-------|-----|------|---|--------|-------|
| 40S ribosomal protein S17 OS=Bos taurus GN=RPS17 PE=2 SV=1 | 3 RS17_BOVIN,sp P04644 RS17_RAT,sp P08708 RS17_HUMAN,sp POCW22 RS17L_HUMAN,sp P63273 RS17_CANFA,sp P63274 RS17_CRIGR,sp P63275 RS17_FELCA,sp P63276 RS17_MOUSE,sp Q6QAP7 RS17_PIG,tr A4D1Q6 A4D1Q6_HUMAN,tr D2HD06 | iAGY VTHL Mk | 70% | 35.3 | 52.00974 | Ref | 0.13 | 0.016 | 0.54 | 0.26 | 0.45 | 0.14 | 0.36 | 48400 | 44900 | 44900 | 72500 | 65800 | 65400 | 55200 | 64000 | 581 | 1740 | 3 | 0.0064 | 3.676 |
| 40S ribosomal protein S17 OS=Bos taurus GN=RPS17 PE=2 SV=1 | 3 RS17_BOVIN,sp P04644 RS17_RAT,sp P08708 RS17_HUMAN,sp POCW22 RS17L_HUMAN,sp P63273 RS17_CANFA,sp P63274 RS17_CRIGR,sp P63275 RS17_FELCA,sp P63276 RS17_MOUSE,sp Q6QAP7 RS17_PIG,tr A4D1Q6 A4D1Q6_HUMAN,tr D2HD06 | iAGY VTHL Mk | 58% | 33.2 | 52.40137 | Ref | 0.13 | 0.099 | 0.47 | 0.31 | 0.39 | 0.25 | 0.34 | 2690  | 2600  | 2760  | 4010  | 3940  | 3640  | 3440  | 3650  | 581 | 1740 | 3 | 0.0183 | 10.52 |

|                                                            |                                                                                                                                                                                                                    |              |     |      |          |     |      |       |      |      |      |      |      |       |       |       |       |       |       |       |       |       |      |   |        |       |
|------------------------------------------------------------|--------------------------------------------------------------------------------------------------------------------------------------------------------------------------------------------------------------------|--------------|-----|------|----------|-----|------|-------|------|------|------|------|------|-------|-------|-------|-------|-------|-------|-------|-------|-------|------|---|--------|-------|
| 40S ribosomal protein S17 OS=Bos taurus GN=RPS17 PE=2 SV=1 | 3 RS17_BOVIN,sp P04644 RS17_RAT,sp P08708 RS17_HUMAN,sp POCW22 RS17L_HUMAN,sp P63273 RS17_CANFA,sp P63274 RS17_CRIGR,sp P63275 RS17_FELCA,sp P63276 RS17_MOUSE,sp Q6QAP7 RS17_PIG,tr A4D1Q6 A4D1Q6_HUMAN,tr D2HD06 | iAGY VTHL Mk | 60% | 33.2 | 52.06143 | Ref | 0.19 | -0.05 | 0.58 | 0.26 | 0.44 | 0.17 | 0.35 | 495   | 499   | 457   | 794   | 701   | 695   | 603   | 674   | 581   | 1740 | 3 | 0.0108 | 6.192 |
| 40S ribosomal protein S17 OS=Bos taurus GN=RPS17 PE=2 SV=1 | 3 RS17_BOVIN,sp P04644 RS17_RAT,sp P08708 RS17_HUMAN,sp POCW22 RS17L_HUMAN,sp P63273 RS17_CANFA,sp P63274 RS17_CRIGR,sp P63275 RS17_FELCA,sp P63276 RS17_MOUSE,sp Q6QAP7 RS17_PIG,tr A4D1Q6 A4D1Q6_HUMAN,tr D2HD06 | iAGY VTHL mk | 52% | 32.3 | 52.67866 | Ref | 0.29 | 0.03  | 0.42 | 0.2  | 0.38 | 0.34 | 0.4  | 12700 | 14800 | 13400 | 19600 | 18600 | 18400 | 18600 | 19400 | 586.3 | 1756 | 3 | 0.0229 | 13.06 |

|                                                                       |                                                                                                                                                                                                                                                                                                                                    |                      |     |      |          |     |        |       |       |        |       |       |      |      |      |      |      |      |      |      |      |       |        |   |        |       |
|-----------------------------------------------------------------------|------------------------------------------------------------------------------------------------------------------------------------------------------------------------------------------------------------------------------------------------------------------------------------------------------------------------------------|----------------------|-----|------|----------|-----|--------|-------|-------|--------|-------|-------|------|------|------|------|------|------|------|------|------|-------|--------|---|--------|-------|
| 40S ribosomal protein S24<br>OS=Homo sapiens<br>GN=RPS24 PE=1<br>SV=1 | 7 RS24_H<br>UMAN,sp<br> P62848 <br>RS24_ME<br>SAU,sp P<br>62849 RS<br>24_MOUS<br>E,sp P628<br>50 RS24_<br>RAT,sp Q<br>4R5H5 RS<br>24_MACF<br>A,sp Q56J<br>U9 RS24_<br>BOVIN,sp<br> Q5RAQ8<br> RS24_PO<br>NAB,tr C7<br>SZ45 C7S<br>Z45_AILM<br>E,tr D2H9<br>88 D2H98<br>8_AILME,t<br>r D212K9 <br>D212K9_A<br>ILME,tr D<br>3ZFZ8 D3 | tTPD<br>VIFV<br>FGFR | 95% | 48.9 | 52.99571 | Ref | -0.092 | -0.46 | 0.23  | -0.098 | 0.22  | -0.46 | 0.33 | 1240 | 1360 | 1150 | 2070 | 1820 | 1990 | 1290 | 2220 | 852   | 1701.9 | 2 | 0.0099 | 5.791 |
| 40S ribosomal protein S24<br>OS=Homo sapiens<br>GN=RPS24 PE=1<br>SV=1 | 7 RS24_H<br>UMAN,sp<br> P62848 <br>RS24_ME<br>SAU,sp P<br>62849 RS<br>24_MOUS<br>E,sp P628<br>50 RS24_<br>RAT,sp Q<br>4R5H5 RS<br>24_MACF<br>A,sp Q56J<br>U9 RS24_<br>BOVIN,sp<br> Q5RAQ8<br> RS24_PO<br>NAB,tr C7<br>SZ45 C7S<br>Z45_AILM<br>E,tr D2H9<br>88 D2H98<br>8_AILME,t<br>r D212K9 <br>D212K9_A<br>ILME,tr D<br>3ZFZ8 D3 | tTPD<br>VIFV<br>FGFR | 90% | 45.3 | 52.87949 | Ref | -0.19  | -0.12 | -0.12 | -0.33  | -0.22 | -0.38 | 0.36 | 1070 | 659  | 752  | 845  | 803  | 757  | 709  | 1170 | 568.3 | 1701.9 | 3 | 0.0074 | 4.373 |



|                                                                       |                                                                                                                                                                                                                                                                                                                                    |                      |     |      |          |     |       |       |       |       |       |       |       |     |     |     |     |     |     |     |     |       |        |   |       |      |
|-----------------------------------------------------------------------|------------------------------------------------------------------------------------------------------------------------------------------------------------------------------------------------------------------------------------------------------------------------------------------------------------------------------------|----------------------|-----|------|----------|-----|-------|-------|-------|-------|-------|-------|-------|-----|-----|-----|-----|-----|-----|-----|-----|-------|--------|---|-------|------|
| 40S ribosomal protein S24<br>OS=Homo sapiens<br>GN=RPS24 PE=1<br>SV=1 | 7 RS24_H<br>UMAN,sp<br> P62848 <br>RS24_ME<br>SAU,sp P<br>62849 RS<br>24_MOUS<br>E,sp P628<br>50 RS24_<br>RAT,sp Q<br>4R5H5 RS<br>24_MACF<br>A,sp Q56J<br>U9 RS24_<br>BOVIN,sp<br> Q5RAQ8<br> RS24_PO<br>NAB,tr C7<br>SZ45 C7S<br>Z45_AILM<br>E,tr D2H9<br>88 D2H98<br>8_AILME,t<br>r D212K9 <br>D212K9_A<br>ILME,tr D<br>3ZFZ8 D3 | tTPD<br>VIFV<br>FGFR | 60% | 34   | 52.92661 | Ref | 0.11  | 0.31  | -0.17 | -0.27 | -0.34 | -0.27 | -0.06 | 361 | 318 | 396 | 319 | 328 | 272 | 299 | 343 | 568.3 | 1701.9 | 3 | 0.008 | 4.69 |
| 40S ribosomal protein S24<br>OS=Homo sapiens<br>GN=RPS24 PE=1<br>SV=1 | 7 RS24_H<br>UMAN,sp<br> P62848 <br>RS24_ME<br>SAU,sp P<br>62849 RS<br>24_MOUS<br>E,sp P628<br>50 RS24_<br>RAT,sp Q<br>4R5H5 RS<br>24_MACF<br>A,sp Q56J<br>U9 RS24_<br>BOVIN,sp<br> Q5RAQ8<br> RS24_PO<br>NAB,tr C7<br>SZ45 C7S<br>Z45_AILM<br>E,tr D2H9<br>88 D2H98<br>8_AILME,t<br>r D212K9 <br>D212K9_A<br>ILME,tr D<br>3ZFZ8 D3 | tTPD<br>VIFV<br>FGFR | 55% | 33.1 | 52.92661 | Ref | 0.037 | -0.15 | -0.05 | -0.11 | -0.3  | 0.27  | -0.15 | 532 | 507 | 482 | 583 | 614 | 470 | 728 | 542 | 568.3 | 1701.9 | 3 | 0.008 | 4.69 |

|                                                                       |                                                                                                                                                                                                                                                                                                                                    |                      |     |      |          |     |       |       |       |       |       |       |       |     |     |     |     |     |     |     |     |       |        |   |        |       |
|-----------------------------------------------------------------------|------------------------------------------------------------------------------------------------------------------------------------------------------------------------------------------------------------------------------------------------------------------------------------------------------------------------------------|----------------------|-----|------|----------|-----|-------|-------|-------|-------|-------|-------|-------|-----|-----|-----|-----|-----|-----|-----|-----|-------|--------|---|--------|-------|
| 40S ribosomal protein S24<br>OS=Homo sapiens<br>GN=RPS24 PE=1<br>SV=1 | 7 RS24_H<br>UMAN,sp<br> P62848 <br>RS24_ME<br>SAU,sp P<br>62849 RS<br>24_MOUS<br>E,sp P628<br>50 RS24_<br>RAT,sp Q<br>4R5H5 RS<br>24_MACF<br>A,sp Q56J<br>U9 RS24_<br>BOVIN,sp<br> Q5RAQ8<br> RS24_PO<br>NAB,tr C7<br>SZ45 C7S<br>Z45_AILM<br>E,tr D2H9<br>88 D2H98<br>8_AILME,t<br>r D212K9 <br>D212K9_A<br>ILME,tr D<br>3ZFZ8 D3 | tTPD<br>VIFV<br>FGFR | 70% | 36.2 | 52.94685 | Ref | -0.13 | -0.06 | 0.068 | -0.24 | -0.28 | -0.34 | 0.099 | 482 | 315 | 360 | 441 | 393 | 332 | 334 | 449 | 568.3 | 1701.9 | 3 | 0.0109 | 6.417 |
| 40S ribosomal protein S24<br>OS=Homo sapiens<br>GN=RPS24 PE=1<br>SV=1 | 7 RS24_H<br>UMAN,sp<br> P62848 <br>RS24_ME<br>SAU,sp P<br>62849 RS<br>24_MOUS<br>E,sp P628<br>50 RS24_<br>RAT,sp Q<br>4R5H5 RS<br>24_MACF<br>A,sp Q56J<br>U9 RS24_<br>BOVIN,sp<br> Q5RAQ8<br> RS24_PO<br>NAB,tr C7<br>SZ45 C7S<br>Z45_AILM<br>E,tr D2H9<br>88 D2H98<br>8_AILME,t<br>r D212K9 <br>D212K9_A<br>ILME,tr D<br>3ZFZ8 D3 | tTPD<br>VIFV<br>FGFR | 70% | 36.1 | 52.9743  | Ref | 0.12  | 0.1   | 0.17  | -0.35 | -0.29 | 0.12  | -0.12 | 171 | 207 | 222 | 261 | 201 | 182 | 253 | 212 | 568.3 | 1701.9 | 3 | 0.0309 | 18.13 |

|                                                        |                                                                                                                                                                                                            |             |     |     |      |          |     |       |      |      |      |     |      |     |      |      |       |       |       |       |      |       |     |        |   |        |       |
|--------------------------------------------------------|------------------------------------------------------------------------------------------------------------------------------------------------------------------------------------------------------------|-------------|-----|-----|------|----------|-----|-------|------|------|------|-----|------|-----|------|------|-------|-------|-------|-------|------|-------|-----|--------|---|--------|-------|
| Stathmin OS=Rattus norvegicus<br>GN=Stmn1 PE=1<br>SV=2 | 8 STMN1_RAT,sp P16949 STMN1_HUMAN,sp P54227 STMN1_MOUSE,sp Q3T0C7 STMN1_BOVIN,sp Q4R712 STMN1_MACFA,sp Q6DUB7 STMN1_PIG,tr B5BU83 B5BU83_HUMAN,tr D2GWF5 D2GWF5_AILME,tr D3Z5N2 D3Z5N2_MOUSE,tr E2R2D9 E2R | aiEENnN     | Fsk | 95% | 58   | 52.78966 | Ref | -1    | 0.73 | 0.88 | 0.95 | 1.4 | 0.32 | 1.6 | 6160 | 3000 | 11000 | 13700 | 15800 | 18700 | 9330 | 21800 | 888 | 1773.9 | 2 | 0.0189 | 10.64 |
| Stathmin OS=Rattus norvegicus<br>GN=Stmn1 PE=1<br>SV=2 | 8 STMN1_RAT,sp P16949 STMN1_HUMAN,sp P54227 STMN1_MOUSE,sp Q3T0C7 STMN1_BOVIN,sp Q4R712 STMN1_MACFA,sp Q6DUB7 STMN1_PIG,tr B5BU83 B5BU83_HUMAN,tr D2GWF5 D2GWF5_AILME,tr D3Z5N2 D3Z5N2_MOUSE,tr E2R2D9 E2R | aSGQAFELILS | PR  | 95% | 53.6 | 52.8331  | Ref | -0.02 | 0.72 | 0.74 | 0.93 | 1.2 | 0.58 | 1.4 | 2500 | 1970 | 3570  | 4040  | 5090  | 5230  | 3640 | 6280  | 847 | 1691.9 | 2 | 0.0127 | 7.489 |

|                                                        |                                                                                                                                                                                                                                                                                                                    |              |   |     |      |          |     |       |      |      |      |     |      |     |       |       |       |       |       |       |       |       |       |        |   |        |       |
|--------------------------------------------------------|--------------------------------------------------------------------------------------------------------------------------------------------------------------------------------------------------------------------------------------------------------------------------------------------------------------------|--------------|---|-----|------|----------|-----|-------|------|------|------|-----|------|-----|-------|-------|-------|-------|-------|-------|-------|-------|-------|--------|---|--------|-------|
| Stathmin OS=Rattus norvegicus<br>GN=Stmn1 PE=1<br>SV=2 | 8 STMN1<br>_RAT,sp <br>P16949 S<br>TMN1_H<br>UMAN,sp<br> P54227 <br>STMN1_<br>MOUSE,s<br>p Q3T0C7<br> STMN1_<br>BOVIN,sp<br> Q4R712 <br>STMN1_<br>MACFA,sp<br> Q6DUB7<br> STMN1_<br>PIG,tr B5<br>BU83 B5<br>BU83_HU<br>MAN,tr D<br>2GWF5 D<br>2GWF5_A<br>ILME,tr D<br>3Z5N2 D3<br>Z5N2_MO<br>USE,tr E2<br>R2D9 E2R | dLSL<br>EEIQ | k | 95% | 53.5 | 52.72144 | Ref | -0.68 | 0.66 | 0.85 | 1.1  | 1.3 | 0.31 | 1.4 | 8220  | 4470  | 12300 | 15700 | 20500 | 21200 | 10800 | 23600 | 842   | 1682   | 2 | 0.0183 | 10.86 |
| Stathmin OS=Rattus norvegicus<br>GN=Stmn1 PE=1<br>SV=2 | 8 STMN1<br>_RAT,sp <br>P16949 S<br>TMN1_H<br>UMAN,sp<br> P54227 <br>STMN1_<br>MOUSE,s<br>p Q3T0C7<br> STMN1_<br>BOVIN,sp<br> Q4R712 <br>STMN1_<br>MACFA,sp<br> Q6DUB7<br> STMN1_<br>PIG,tr B5<br>BU83 B5<br>BU83_HU<br>MAN,tr D<br>2GWF5 D<br>2GWF5_A<br>ILME,tr D<br>3Z5N2 D3<br>Z5N2_MO<br>USE,tr E2<br>R2D9 E2R | eAQ<br>MAA   | k | 56% | 31.7 | 51.64555 | Ref | -0.19 | 0.75 | 0.72 | 0.91 | 1.3 | 0.64 | 1.3 | 25500 | 18700 | 38900 | 42800 | 53600 | 60400 | 40600 | 65500 | 678.9 | 1355.7 | 2 | 0.0243 | 17.89 |

|                                                             |                                                                                                                                                                                                            |                                   |     |      |          |     |       |       |       |       |       |       |       |      |      |      |      |      |      |      |      |       |        |   |        |       |
|-------------------------------------------------------------|------------------------------------------------------------------------------------------------------------------------------------------------------------------------------------------------------------|-----------------------------------|-----|------|----------|-----|-------|-------|-------|-------|-------|-------|-------|------|------|------|------|------|------|------|------|-------|--------|---|--------|-------|
| Stathmin OS=Rattus norvegicus GN=Stmn1 PE=1 SV=2            | 8 STMN1_RAT,sp P16949 STMN1_HUMAN,sp P54227 STMN1_MOUSE,sp Q3TOC7 STMN1_BOVIN,sp Q4R712 STMN1_MACFA,sp Q6DUB7 STMN1_PIG,tr B5BU83 B5BU83_HUMAN,tr D2GWF5 D2GWF5_AILME,tr D3Z5N2 D3Z5N2_MOUSE,tr E2R2D9 E2R | sHEA<br>EVLK                      | 90% | 42.5 | 52.73214 | Ref | -0.17 | 0.75  | 0.66  | 0.92  | 1.3   | 0.54  | 1.4   | 2390 | 2040 | 4170 | 4400 | 5830 | 6800 | 4070 | 7490 | 760.9 | 1519.9 | 2 | 0.0227 | 14.91 |
| Uncharacterized protein OS=Bos taurus GN=Bt.30397 PE=3 SV=1 | tr F1MQ21 F1MQ21_BOVIN                                                                                                                                                                                     | aPW<br>AGA<br>PLHL<br>GQG<br>QFLK | 95% | 55   | 53.28573 | Ref | -0.32 | 0.12  | -0.51 | -0.28 | -0.07 | -0.43 | -0.04 | 1230 | 918  | 1360 | 981  | 1270 | 1280 | 1040 | 1350 | 800.5 | 2398.4 | 3 | 0.016  | 6.66  |
| Uncharacterized protein OS=Bos taurus GN=Bt.30397 PE=3 SV=1 | tr F1MQ21 F1MQ21_BOVIN                                                                                                                                                                                     | aPW<br>AGA<br>PLHL<br>GQG<br>QFLK | 63% | 33   | 53.16627 | Ref | -0.33 | -0.15 | -0.39 | -0.14 | -0.24 | -0.19 | -0.06 | 2660 | 1910 | 2360 | 2240 | 2930 | 2390 | 2590 | 2820 | 600.6 | 2398.4 | 4 | 0.0143 | 5.95  |
| Uncharacterized protein OS=Bos taurus GN=Bt.30397 PE=3 SV=1 | tr F1MQ21 F1MQ21_BOVIN                                                                                                                                                                                     | dNLA<br>EEVE<br>GVA<br>SR         | 93% | 44.2 | 52.01946 | Ref | -0.18 | -0.28 | -0.38 | -0.16 | -0.42 | -0.1  | -0.11 | 2110 | 1560 | 1580 | 1650 | 2120 | 1540 | 2030 | 1990 | 846.9 | 1691.9 | 2 | 0.0091 | 5.39  |

|                                                                     |                        |                                   |     |      |          |     |       |       |       |        |       |       |       |       |       |       |       |       |       |       |       |       |        |   |        |       |
|---------------------------------------------------------------------|------------------------|-----------------------------------|-----|------|----------|-----|-------|-------|-------|--------|-------|-------|-------|-------|-------|-------|-------|-------|-------|-------|-------|-------|--------|---|--------|-------|
| Uncharacterized protein OS=Bos taurus GN=Bt.30397 PE=3 SV=1         | tr F1MQ21 F1MQ21_BOVIN | sLEE<br>ENLE<br>TLk               | 95% | 52.5 | 53.51396 | Ref | -0.38 | -0.09 | -0.48 | -0.19  | -0.28 | -0.1  | -0.15 | 5740  | 3660  | 4850  | 4150  | 5610  | 4600  | 5440  | 5200  | 957   | 1912.1 | 2 | 0.0105 | 5.472 |
| Uncharacterized protein OS=Bos taurus GN=Bt.30397 PE=3 SV=1         | tr F1MQ21 F1MQ21_BOVIN | sLEK<br>ETLE<br>LLkPI<br>Gk       | 77% | 19.7 | 40.19656 | Ref | -0.32 | -0.04 | -0.46 | -0.15  | -0.38 | -0.06 | -0.18 | 2750  | 1910  | 2520  | 2110  | 2900  | 2150  | 2800  | 2560  | 583.8 | 2913.8 | 5 | 0.0031 | 1.066 |
| Uncharacterized protein OS=Monodelphis domestica GN=TUBB6 PE=3 SV=1 | tr F7CB79 F7CB79_MONDO | eIVH<br>IQAG<br>QcG<br>NQI<br>GtK | 86% | 43.9 | 54.77201 | Ref | 0.14  | -0.57 | 0.3   | -0.051 | 0.25  | -0.06 | 0.15  | 2080  | 2160  | 1430  | 2940  | 2540  | 2740  | 2310  | 2630  | 817.4 | 2449.3 | 3 | 0.0161 | 6.572 |
| Uncharacterized protein OS=Monodelphis domestica GN=TUBB6 PE=3 SV=1 | tr F7CB79 F7CB79_MONDO | eVD<br>EQM<br>LAIQ<br>Nk          | 93% | 49.3 | 53.78156 | Ref | 0.062 | -0.06 | -0    | 0.18   | -0.01 | -0.12 | -0.22 | 20200 | 14600 | 14500 | 16900 | 21200 | 16200 | 15700 | 14500 | 676   | 2025.1 | 3 | 0.0127 | 6.264 |
| Uncharacterized protein OS=Monodelphis domestica GN=TUBB6 PE=3 SV=1 | tr F7CB79 F7CB79_MONDO | ISEQ<br>FSA<br>MFR                | 87% | 39.3 | 51.32794 | Ref | 0.31  | -0.21 | 0.27  | -0.085 | -0.15 | -0.2  | -0.14 | 5970  | 5250  | 3960  | 6220  | 5360  | 4460  | 4510  | 4680  | 760.4 | 1518.8 | 2 | 0.0106 | 6.977 |

|                                                                           |                        |                             |     |      |          |     |        |       |       |        |       |       |      |       |       |       |       |       |       |       |       |       |        |   |        |       |
|---------------------------------------------------------------------------|------------------------|-----------------------------|-----|------|----------|-----|--------|-------|-------|--------|-------|-------|------|-------|-------|-------|-------|-------|-------|-------|-------|-------|--------|---|--------|-------|
| Uncharacterized protein<br>OS=Monodelphis domestica<br>GN=TUBB6 PE=3 SV=1 | tr F7CB79 F7CB79_MONDO | IHFF<br>MPG<br>FAPL<br>TAR  | 79% | 39.4 | 53.65411 | Ref | 0.093  | -0.48 | 0.038 | -0.018 | 0.004 | -0.04 | 0.56 | 378   | 385   | 281   | 451   | 479   | 424   | 429   | 647   | 637   | 1908   | 3 | 0.0075 | 3.927 |
| Uncharacterized protein<br>OS=Monodelphis domestica<br>GN=TUBB6 PE=3 SV=1 | tr F7CB79 F7CB79_MONDO | IHFF<br>mPG<br>FAPL<br>TAR  | 95% | 59.1 | 53.62923 | Ref | 0.23   | -0.07 | 0.014 | -0.14  | -0.11 | -0.22 | 0.42 | 1560  | 1580  | 1400  | 1660  | 1650  | 1470  | 1420  | 2200  | 642.3 | 1924   | 3 | 0.0104 | 5.414 |
| Cadherin-5 OS=Bos taurus GN=CDH5 PE=2 SV=1                                | sp Q6URK6 CADH5_BOVIN  | kPLI<br>GSVL<br>AK          | 86% | 24.3 | 37.41546 | Ref | -0.3   | -0.92 | 0.36  | -0.001 | 0.32  | -1.4  | 0.22 | 24500 | 15000 | 10600 | 28800 | 24800 | 27100 | 8430  | 26200 | 485.3 | 1937.3 | 4 | 0.0026 | 1.329 |
| Cadherin-5 OS=Bos taurus GN=CDH5 PE=2 SV=1                                | sp Q6URK6 CADH5_BOVIN  | kPLI<br>GSVL<br>AK          | 95% | 43.7 | 37.27623 | Ref | -0.1   | -0.55 | 0.16  | -0.091 | 0.09  | -0.41 | 0.15 | 12100 | 10200 | 8120  | 14900 | 13800 | 13700 | 10100 | 14800 | 646.8 | 1937.3 | 3 | 0.002  | 1.026 |
| Cadherin-5 OS=Bos taurus GN=CDH5 PE=2 SV=1                                | sp Q6URK6 CADH5_BOVIN  | IVVQ<br>ISAT<br>DkDI<br>TPR | 95% | 65.1 | 52.06543 | Ref | 0.0071 | -0.91 | 0.57  | -0.76  | 0.35  | -0.9  | 0.76 | 2780  | 5540  | 3180  | 9950  | 4370  | 8250  | 3620  | 11300 | 755.4 | 2263.3 | 3 | 0.017  | 7.517 |
| Cadherin-5 OS=Bos taurus GN=CDH5 PE=2 SV=1                                | sp Q6URK6 CADH5_BOVIN  | nLES<br>PSSF<br>TIK         | 94% | 46.5 | 53.15868 | Ref | -0.2   | -0.81 | 0.26  | -0.17  | 0.09  | -0.84 | 0.38 | 11600 | 7970  | 5670  | 13400 | 11000 | 11400 | 6280  | 14500 | 916   | 1830   | 2 | 0.0097 | 5.316 |
| Cadherin-5 OS=Bos taurus GN=CDH5 PE=2 SV=1                                | sp Q6URK6 CADH5_BOVIN  | yTFS<br>VPE<br>DIR          | 57% | 32.1 | 51.90615 | Ref | -0.13  | -0.61 | 0.2   | -0.2   | 0.22  | -0.83 | 0.32 | 11400 | 9040  | 7030  | 13800 | 11500 | 13500 | 6810  | 15000 | 765.9 | 1529.8 | 2 | 0.0146 | 9.555 |

|                                                                          |                                                                                                                                                                                                              |                           |     |      |          |     |        |       |       |        |       |       |       |      |      |      |      |      |      |      |      |       |        |   |        |       |
|--------------------------------------------------------------------------|--------------------------------------------------------------------------------------------------------------------------------------------------------------------------------------------------------------|---------------------------|-----|------|----------|-----|--------|-------|-------|--------|-------|-------|-------|------|------|------|------|------|------|------|------|-------|--------|---|--------|-------|
| Transitional endoplasmic reticulum ATPase OS=Sus scrofa GN=VCP PE=1 SV=5 | sp P03974 TERA_PIG,sp P46462 TERA_RAT,sp P55072 TERA_HUMAN,sp Q01853 TERA_MOUSE,sp Q3ZBT1 TERA_BOVIN,trans E2RLQ9 E2RLQ9_CANFA,trans F6WT88 F6WT88_MACMU,trans F7A525 F7A525_CALJA,trans F7BWW6 F7BWW6_HORSE | gDDL<br>STAI<br>Lk        | 95% | 63.8 | 52.05166 | Ref | -0.24  | -0.29 | -0.01 | -0.096 | -0.09 | -0.42 | -0.33 | 9910 | 6300 | 6580 | 8970 | 9330 | 8200 | 6820 | 7190 | 821   | 1640   | 2 | 0.008  | 4.899 |
| Transitional endoplasmic reticulum ATPase OS=Sus scrofa GN=VCP PE=1 SV=5 | sp P03974 TERA_PIG,sp P46462 TERA_RAT,sp P55072 TERA_HUMAN,sp Q01853 TERA_MOUSE,sp Q3ZBT1 TERA_BOVIN,trans E2RLQ9 E2RLQ9_CANFA,trans F6WT88 F6WT88_MACMU,trans F7A525 F7A525_CALJA,trans F7BWW6 F7BWW6_HORSE | gGNI<br>GDG<br>GGA<br>ADR | 95% | 65.1 | 49.42231 | Ref | -0.052 | -0.24 | -0.02 | -0.07  | -0.28 | -0.17 | -0.41 | 8190 | 6700 | 6390 | 8340 | 8880 | 6690 | 7550 | 6330 | 710.9 | 1419.7 | 2 | 0.0111 | 7.796 |



|                                                                          |                                                                                                                                                                                                              |                  |     |      |          |     |        |       |       |       |       |       |       |      |      |      |      |      |      |      |      |       |        |   |        |       |
|--------------------------------------------------------------------------|--------------------------------------------------------------------------------------------------------------------------------------------------------------------------------------------------------------|------------------|-----|------|----------|-----|--------|-------|-------|-------|-------|-------|-------|------|------|------|------|------|------|------|------|-------|--------|---|--------|-------|
| Transitional endoplasmic reticulum ATPase OS=Sus scrofa GN=VCP PE=1 SV=5 | sp P03974 TERA_PIG,sp P46462 TERA_RAT,sp P55072 TERA_HUMAN,sp Q01853 TERA_MOUSE,sp Q3ZBT1 TERA_BOVIN,trans E2RLQ9 E2RLQ9_CANFA,trans F6WT88 F6WT88_MACMU,trans F7A525 F7A525_CALJA,trans F7BWW6 F7BWW6_HORSE | KYEMFAMFAQTLQQSR | 85% | 43.2 | 54.7159  | Ref | 0.0005 | -0.14 | -0.15 | -0.16 | -0.32 | -0.19 | -0.17 | 6060 | 5420 | 5340 | 5930 | 6490 | 5100 | 5810 | 5840 | 746.7 | 2237.2 | 3 | 0.0149 | 6.644 |
| Transitional endoplasmic reticulum ATPase OS=Sus scrofa GN=VCP PE=1 SV=5 | sp P03974 TERA_PIG,sp P46462 TERA_RAT,sp P55072 TERA_HUMAN,sp Q01853 TERA_MOUSE,sp Q3ZBT1 TERA_BOVIN,trans E2RLQ9 E2RLQ9_CANFA,trans F6WT88 F6WT88_MACMU,trans F7A525 F7A525_CALJA,trans F7BWW6 F7BWW6_HORSE | KYEMFAMFAQTLQQSR | 63% | 36.4 | 54.71214 | Ref | 0.073  | -0.32 | -0.21 | -0.14 | -0.16 | -0.07 | -0.13 | 4110 | 4400 | 3630 | 4410 | 5090 | 4380 | 4880 | 4630 | 746.7 | 2237.2 | 3 | 0.013  | 5.826 |

|                                                                          |                                                                                                                                                                                                  |                                   |     |      |          |     |        |       |       |       |       |       |       |       |       |       |       |       |       |      |       |       |        |   |        |       |
|--------------------------------------------------------------------------|--------------------------------------------------------------------------------------------------------------------------------------------------------------------------------------------------|-----------------------------------|-----|------|----------|-----|--------|-------|-------|-------|-------|-------|-------|-------|-------|-------|-------|-------|-------|------|-------|-------|--------|---|--------|-------|
| Transitional endoplasmic reticulum ATPase OS=Sus scrofa GN=VCP PE=1 SV=5 | sp P03974 TERA_PIG,sp P46462 TERA_RAT,sp P55072 TERA_HUMAN,sp Q01853 TERA_MOUSE,sp Q3ZBT1 TERA_BOVIN,tr E2RLQ9 E2RLQ9_CANFA,tr F6WT88 F6WT88_MACMU,tr F7A525 F7A525_CALJA,tr F7BWW6 F7BWW6_HORSE | IHLQ<br>IHTK                      | 80% | 35.5 | 49.07524 | Ref | -0.056 | -0.22 | -0.16 | -0.18 | -0.31 | 0.004 | -0.26 | 4660  | 3890  | 3760  | 4420  | 4800  | 3820  | 4970 | 4100  | 568.4 | 1702.1 | 3 | 0.0088 | 5.152 |
| Uncharacterized protein OS=Sus scrofa GN=Ssc.1952 PE=4 SV=1              | tr F1S880 F1S880_PIG,tr F1S884 F1S884_PIG                                                                                                                                                        | dLIH<br>DQD<br>EDEE<br>EEEE<br>QR | 95% | 79.2 | 47.03068 | Ref | 0.11   | -0.22 | 0.16  | 0.071 | 0.18  | -0.33 | -0.18 | 5800  | 4380  | 3790  | 5510  | 5720  | 5400  | 3960 | 4360  | 797.4 | 2389   | 3 | 0.0153 | 6.383 |
| Uncharacterized protein OS=Sus scrofa GN=Ssc.1952 PE=4 SV=1              | tr F1S880 F1S880_PIG,tr F1S884 F1S884_PIG                                                                                                                                                        | eHG<br>AVA<br>VER                 | 74% | 35.1 | 50.89806 | Ref | 0.092  | 0.23  | 0.18  | -0.16 | 0.19  | -0.4  | 0.016 | 10700 | 9890  | 11800 | 12800 | 11100 | 12400 | 8600 | 11400 | 424.6 | 1270.7 | 3 | 0.008  | 6.262 |
| Uncharacterized protein OS=Sus scrofa GN=Ssc.1952 PE=4 SV=1              | tr F1S880 F1S880_PIG,tr F1S884 F1S884_PIG                                                                                                                                                        | IGAA<br>PEEE<br>SAYV<br>AGE<br>R  | 95% | 49.2 | 52.40896 | Ref | 0.044  | -0.43 | 0.22  | 0.14  | 0.27  | -0.62 | 0.31  | 11700 | 10200 | 7990  | 14000 | 14600 | 14000 | 7880 | 14900 | 977   | 1952   | 2 | 0.0135 | 6.93  |

|                                                            |                                                                                                                                                                                               |                                                 |     |      |          |     |        |       |       |       |       |       |       |       |       |       |       |       |       |       |       |       |        |   |        |       |
|------------------------------------------------------------|-----------------------------------------------------------------------------------------------------------------------------------------------------------------------------------------------|-------------------------------------------------|-----|------|----------|-----|--------|-------|-------|-------|-------|-------|-------|-------|-------|-------|-------|-------|-------|-------|-------|-------|--------|---|--------|-------|
| Uncharacterized protein OS=Sus scrofa GN=Sc.1952 PE=4 SV=1 | tr F1S880 F1S880_PIG, tr F1S884 F1S84_PIG                                                                                                                                                     | IGAA<br>PEEE<br>SAYV<br>AGE<br>R                | 85% | 41.2 | 52.40868 | Ref | -0.08  | -0.02 | 0.28  | 0.21  | -0.1  | -0.05 | -0.05 | 13000 | 10800 | 12100 | 16900 | 17600 | 12400 | 13400 | 13400 | 651.7 | 1952   | 3 | 0.0133 | 6.805 |
| Uncharacterized protein OS=Sus scrofa GN=Sc.1952 PE=4 SV=1 | tr F1S880 F1S880_PIG, tr F1S884 F1S84_PIG                                                                                                                                                     | IGST<br>APQ<br>VLNT<br>SSPA<br>QQA<br>ENE<br>AK | 84% | 43.3 | 55.51626 | Ref | -0.021 | 0.31  | 0.31  | 0.08  | 0.062 | -0.9  | 0.2   | 1950  | 1820  | 2480  | 2790  | 2620  | 2260  | 1210  | 2570  | 983.9 | 2948.5 | 3 | 0.0195 | 6.62  |
| Alpha-actinin-1 OS=Macaca fascicularis GN=ACTN1 PE=2 SV=1  | sp Q2PFV7 ACTN1_MACFA, sp Q3B7N2 ACTN1_BOVIN, tr A4ZZF8 A4ZZF8_BOVIN, tr E2QY07 E2QY07_CA_NFA, tr E2QY08 E2QY08_CA_NFA, tr F1MNY7 F1MNY7_BOVIN, tr F1PGU0 F1PGU0_CA_NFA, tr F1SA20 F1SA20_PIG | dGL<br>GFcA<br>LIHR                             | 95% | 53.9 | 52.09461 | Ref | -0.23  | -0.41 | -0.23 | -0.45 | -0.71 | -0.26 | -0.65 | 2470  | 1480  | 1420  | 1810  | 1710  | 1250  | 1780  | 1350  | 517.9 | 1550.8 | 3 | 0.0045 | 2.915 |

|                                                                       |                                                                                                                                                                                     |                      |     |      |          |     |       |       |       |        |       |       |       |      |      |      |      |      |      |      |      |       |        |   |        |       |
|-----------------------------------------------------------------------|-------------------------------------------------------------------------------------------------------------------------------------------------------------------------------------|----------------------|-----|------|----------|-----|-------|-------|-------|--------|-------|-------|-------|------|------|------|------|------|------|------|------|-------|--------|---|--------|-------|
| Alpha-actinin-1<br>OS=Macaca<br>fascicularis<br>GN=ACTN1 PE=2<br>SV=1 | sp Q2PFV7 ACTN1_MACFA,sp Q3B7N2 ACTN1_BOVIN,tr A4ZZF8 A4ZZF8_BOVIN,tr E2QY07 E2QY07_CANFA,tr E2QY08 E2QY08_CANFA,tr F1MNY7 F1MNY7_BOVIN,tr F1PGU0 F1PGU0_CANFA,tr F1SA20 F1SA20_PIG | eTADTDQVMASFK        | 81% | 39.9 | 53.16938 | Ref | -0.34 | -0.26 | -0.6  | -0.006 | -0.13 | -0.49 | -0.55 | 6980 | 5300 | 6110 | 5400 | 8980 | 7210 | 5870 | 5570 | 780.1 | 2337.1 | 3 | 0.019  | 8.143 |
| Alpha-actinin-1<br>OS=Macaca<br>fascicularis<br>GN=ACTN1 PE=2<br>SV=1 | sp Q2PFV7 ACTN1_MACFA,sp Q3B7N2 ACTN1_BOVIN,tr A4ZZF8 A4ZZF8_BOVIN,tr E2QY07 E2QY07_CANFA,tr E2QY08 E2QY08_CANFA,tr F1MNY7 F1MNY7_BOVIN,tr F1PGU0 F1PGU0_CANFA,tr F1SA20 F1SA20_PIG | IAILG<br>IHNE<br>Vsk | 75% | 32.4 | 49.71906 | Ref | -0.42 | -0.36 | -0.52 | -0.33  | -0.34 | -0.06 | -0.45 | 2320 | 1500 | 1700 | 1710 | 2150 | 1860 | 2360 | 1790 | 476.3 | 1901.1 | 4 | 0.0078 | 4.112 |

|                                                                       |                                                                                                                                                                                     |                         |     |      |          |     |      |       |       |       |       |       |       |       |       |       |       |       |       |       |       |       |        |   |        |       |
|-----------------------------------------------------------------------|-------------------------------------------------------------------------------------------------------------------------------------------------------------------------------------|-------------------------|-----|------|----------|-----|------|-------|-------|-------|-------|-------|-------|-------|-------|-------|-------|-------|-------|-------|-------|-------|--------|---|--------|-------|
| Alpha-actinin-1<br>OS=Macaca<br>fascicularis<br>GN=ACTN1 PE=2<br>SV=1 | sp Q2PFV7 ACTN1_MACFA,sp Q3B7N2 ACTN1_BOVIN,tr A4ZZF8 A4ZZF8_BOVIN,tr E2QY07 E2QY07_CANFA,tr E2QY08 E2QY08_CANFA,tr F1MNY7 F1MNY7_BOVIN,tr F1PGU0 F1PGU0_CANFA,tr F1SA20 F1SA20_PIG | nYIT<br>VDEL<br>R       | 56% | 32.1 | 52.07333 | Ref | -0.2 | -0.28 | -0.24 | -0.4  | -0.64 | -0.34 | -0.56 | 33400 | 23100 | 23700 | 27500 | 27100 | 20100 | 25800 | 22000 | 713.9 | 1425.8 | 2 | 0.0111 | 7.768 |
| Alpha-actinin-1<br>OS=Macaca<br>fascicularis<br>GN=ACTN1 PE=2<br>SV=1 | sp Q2PFV7 ACTN1_MACFA,sp Q3B7N2 ACTN1_BOVIN,tr A4ZZF8 A4ZZF8_BOVIN,tr E2QY07 E2QY07_CANFA,tr E2QY08 E2QY08_CANFA,tr F1MNY7 F1MNY7_BOVIN,tr F1PGU0 F1PGU0_CANFA,tr F1SA20 F1SA20_PIG | rDQ<br>ALTE<br>EHA<br>R | 88% | 41.1 | 52.92965 | Ref | -0.3 | -0.11 | -0.23 | -0.41 | -0.33 | -0.32 | -0.47 | 22100 | 18600 | 23100 | 23800 | 23200 | 21300 | 22400 | 20100 | 408.2 | 1628.8 | 4 | 0.0122 | 7.495 |

|                                                                     |                      |                                                    |     |      |          |     |       |       |       |        |       |       |       |       |      |       |      |       |      |       |      |       |        |   |        |       |
|---------------------------------------------------------------------|----------------------|----------------------------------------------------|-----|------|----------|-----|-------|-------|-------|--------|-------|-------|-------|-------|------|-------|------|-------|------|-------|------|-------|--------|---|--------|-------|
| Macrophage-capping protein<br>OS=Bos taurus<br>GN=CAPG PE=2<br>SV=1 | sp Q865V6 CAPG_BOVIN | aHVE<br>IVTD<br>GEEP<br>ADM<br>IQVL<br>GPKP<br>Slk | 84% | 36.7 | 54.30378 | Ref | -0.32 | 0.25  | -0.7  | -0.12  | -0.24 | 0.23  | -0.86 | 3250  | 2110 | 3400  | 1970 | 3250  | 2610 | 3770  | 1770 | 738   | 3685   | 5 | 0.032  | 8.675 |
| Macrophage-capping protein<br>OS=Bos taurus<br>GN=CAPG PE=2<br>SV=1 | sp Q865V6 CAPG_BOVIN | aHVE<br>IVTD<br>GEEP<br>ADM<br>IQVL<br>GPKP<br>Slk | 88% | 42.6 | 54.1905  | Ref | -0.15 | -0.01 | -0.32 | 0.11   | -0.27 | -0.08 | -0.82 | 1090  | 811  | 967   | 874  | 1300  | 872  | 1040  | 617  | 922.3 | 3685   | 4 | 0.028  | 7.585 |
| Macrophage-capping protein<br>OS=Bos taurus<br>GN=CAPG PE=2<br>SV=1 | sp Q865V6 CAPG_BOVIN | eGN<br>PEED<br>LTAD<br>R                           | 95% | 51.3 | 49.42494 | Ref | -0.24 | 0.19  | -0.47 | -0.004 | -0.26 | 0.037 | -0.71 | 9360  | 6970 | 10200 | 7230 | 11000 | 8060 | 10400 | 6120 | 825.4 | 1648.8 | 2 | 0.016  | 9.682 |
| Macrophage-capping protein<br>OS=Bos taurus<br>GN=CAPG PE=2<br>SV=1 | sp Q865V6 CAPG_BOVIN | IPGL<br>HIW<br>R                                   | 54% | 29.8 | 49.74899 | Ref | -0.28 | 0.068 | -0.31 | -0.091 | -0.1  | 0.045 | -0.79 | 4030  | 2880 | 3980  | 3440 | 4410  | 3840 | 4420  | 2460 | 432.6 | 1294.8 | 3 | 0.0028 | 2.159 |
| Macrophage-capping protein<br>OS=Bos taurus<br>GN=CAPG PE=2<br>SV=1 | sp Q865V6 CAPG_BOVIN | yAP<br>NTQ<br>VEIL<br>PQG<br>R                     | 95% | 62.4 | 53.54604 | Ref | -0.5  | 0.23  | -0.6  | 0.16   | -0.19 | 0.06  | -0.64 | 10200 | 6630 | 11900 | 7540 | 14100 | 9610 | 12000 | 7320 | 945.5 | 1889   | 2 | 0.013  | 6.898 |

|                                                                                      |                                                                  |                             |    |     |      |          |     |        |       |       |        |       |       |       |       |       |       |       |       |       |       |       |       |        |   |        |       |
|--------------------------------------------------------------------------------------|------------------------------------------------------------------|-----------------------------|----|-----|------|----------|-----|--------|-------|-------|--------|-------|-------|-------|-------|-------|-------|-------|-------|-------|-------|-------|-------|--------|---|--------|-------|
| Cysteine and glycine rich protein 1<br>OS=Rattus norvegicus<br>GN=Csrp1 PE=2<br>SV=2 | sp P47875 CSR1_1_RAT,sp Q3MHY1 CSR1_BOVIN, tr E2R707 E2R707_CANF | gFGF<br>GQG<br>AGA<br>LVHS  | E  | 95% | 63.7 | 51.80347 | Ref | 0.17   | 0.13  | 0.074 | -0.097 | 0.16  | -0.09 | -0.07 | 6580  | 6500  | 6850  | 7390  | 7230  | 7530  | 6630  | 6660  | 869.4 | 1736.9 | 2 | 0.019  | 10.94 |
| Cysteine and glycine rich protein 1<br>OS=Rattus norvegicus<br>GN=Csrp1 PE=2<br>SV=2 | sp P47875 CSR1_1_RAT,sp Q3MHY1 CSR1_BOVIN, tr E2R707 E2R707_CANF | gFGF<br>GQG<br>AGA<br>LVHS  | E  | 95% | 70   | 52.15002 | Ref | -0.007 | 0.043 | -0.06 | -0.065 | 0.26  | -0.07 | 0.15  | 6450  | 5580  | 6270  | 6560  | 7190  | 7900  | 6550  | 7540  | 869.4 | 1736.9 | 2 | 0.0072 | 4.126 |
| Cysteine and glycine rich protein 1<br>OS=Rattus norvegicus<br>GN=Csrp1 PE=2<br>SV=2 | sp P47875 CSR1_1_RAT,sp Q3MHY1 CSR1_BOVIN, tr E2R707 E2R707_CANF | gLES<br>TTLA<br>DkD<br>GEIY | ck | 93% | 50.9 | 55.33733 | Ref | 0.19   | 0.09  | 0.17  | -0.12  | 0.19  | -0.08 | -0.2  | 4390  | 4390  | 4440  | 5280  | 4760  | 5130  | 4450  | 4050  | 934.5 | 2800.4 | 3 | 0.0283 | 10.1  |
| Cysteine and glycine rich protein 1<br>OS=Rattus norvegicus<br>GN=Csrp1 PE=2<br>SV=2 | sp P47875 CSR1_1_RAT,sp Q3MHY1 CSR1_BOVIN, tr E2R707 E2R707_CANF | gYGY<br>GQG<br>AGTL<br>SMD  | k  | 95% | 68   | 53.18835 | Ref | 0.43   | 0.13  | 0.081 | -0.15  | -0.03 | -0.05 | -0.27 | 18400 | 20900 | 18500 | 20000 | 18900 | 17900 | 18400 | 15700 | 705   | 2112.1 | 3 | 0.0238 | 11.28 |

|                                                                                      |                                                                                                                                                                                                                        |                            |    |     |      |          |     |       |      |       |        |       |       |       |       |       |       |       |       |       |       |       |     |        |   |        |       |
|--------------------------------------------------------------------------------------|------------------------------------------------------------------------------------------------------------------------------------------------------------------------------------------------------------------------|----------------------------|----|-----|------|----------|-----|-------|------|-------|--------|-------|-------|-------|-------|-------|-------|-------|-------|-------|-------|-------|-----|--------|---|--------|-------|
| Cysteine and glycine rich protein 1<br>OS=Rattus norvegicus<br>GN=Csrp1 PE=2<br>SV=2 | sp P47875 CSR1_RAT,sp Q3MHY1 CSR1_BOVIN, tr E2R707 E2R707_CANF                                                                                                                                                         | gYGY<br>GQG<br>AGTL<br>SMD | k  | 95% | 68.2 | 53.35191 | Ref | 0.5   | 0.04 | 0.047 | -0.077 | 0.044 | -0.13 | -0.27 | 20400 | 24800 | 19600 | 22100 | 22400 | 21200 | 19700 | 17800 | 705 | 2112.1 | 3 | 0.0158 | 7.478 |
| Ran-specific GTPase-activating protein<br>OS=Mus musculus<br>GN=Ranbp1 PE=1<br>SV=2  | 2 RANG_MOUSE,sp P43487 RANG_HUMAN,sp Q3T0M7 RANG_BOVIN, tr D4A2G9 D4A2G9_RAT, tr E2RHK9 E2RHK9_CANFA, tr F1RHM8 F1RHM8_PIG, tr F6SRX1 F6SRX1_MONDO, tr F7C2T0 F7C2T0_ORNAN, tr F7C2T7 F7C2T7_ORNAN, tr F7CN40 F7CN40_C | fLNA<br>ENA<br>Qk          | Qk | 95% | 50.9 | 52.68259 | Ref | -0.25 | 0.47 | 0.8   | 0.6    | 0.96  | 0.41  | 1     | 5550  | 3950  | 7050  | 9970  | 9520  | 10700 | 7610  | 11400 | 822 | 1641.9 | 2 | 0.0216 | 13.13 |



|                                                                            |                                                                                                                                                                                                                     |                     |     |      |          |     |       |      |      |      |      |      |     |       |      |       |       |       |       |       |       |       |      |   |        |       |
|----------------------------------------------------------------------------|---------------------------------------------------------------------------------------------------------------------------------------------------------------------------------------------------------------------|---------------------|-----|------|----------|-----|-------|------|------|------|------|------|-----|-------|------|-------|-------|-------|-------|-------|-------|-------|------|---|--------|-------|
| Ran-specific GTPase-activating protein OS=Mus musculus GN=Ranbp1 PE=1 SV=2 | 2 RANG_MOUSE,s p P43487  RANG_HUMAN,sp  Q3T0M7  RANG_BOVIN,tr D4A2G9 D4A2G9_RAT,tr E2RHK9 E2RHK9_CANFA,tr F1RHM8 F1RHM8_PIG,tr F6SRX1 F6SRX1_MONDO,tr F7C2T0 F7C2T0_ORNAN,tr F7C2T7 F7C2T7_ORNAN,tr F7CN40 F7CN40_C | tLEE<br>DEEE<br>LFk | 95% | 67.9 | 53.45438 | Ref | -0.2  | 0.62 | 0.73 | 0.64 | 0.97 | 0.39 | 1   | 1750  | 1560 | 2990  | 3610  | 3750  | 4110  | 2860  | 4440  | 995.5 | 1989 | 2 | 0.0157 | 7.905 |
| Ran-specific GTPase-activating protein OS=Mus musculus GN=Ranbp1 PE=1 SV=2 | 2 RANG_MOUSE,s p P43487  RANG_HUMAN,sp  Q3T0M7  RANG_BOVIN,tr D4A2G9 D4A2G9_RAT,tr E2RHK9 E2RHK9_CANFA,tr F1RHM8 F1RHM8_PIG,tr F6SRX1 F6SRX1_MONDO,tr F7C2T0 F7C2T0_ORNAN,tr F7C2T7 F7C2T7_ORNAN,tr F7CN40 F7CN40_C | tLEE<br>DEEE<br>LFk | 88% | 44.3 | 53.47917 | Ref | -0.38 | 0.54 | 0.76 | 0.7  | 0.96 | 0.29 | 1.1 | 10600 | 7150 | 14700 | 19200 | 20300 | 21200 | 13900 | 23500 | 664   | 1989 | 3 | 0.013  | 6.526 |



|                                                                    |                                                         |                                         |     |      |          |     |        |      |      |      |      |      |      |       |      |       |       |       |       |       |       |       |        |   |        |       |
|--------------------------------------------------------------------|---------------------------------------------------------|-----------------------------------------|-----|------|----------|-----|--------|------|------|------|------|------|------|-------|------|-------|-------|-------|-------|-------|-------|-------|--------|---|--------|-------|
| 60S acidic ribosomal protein P2 OS=Homo sapiens GN=RPLP2 PE=1 SV=1 | sp P05387 RLA2_HUMAN,sp P42899 RLA2_BOVIN,tr F7CGS1 F7C | iLDS<br>VGIE<br>ADD<br>DRL<br>Nk        | 79% | 38.3 | 54.44513 | Ref | -0.76  | 0.48 | 0.12 | 0.32 | 0.48 | 0.4  | 0.94 | 10200 | 5540 | 14200 | 12300 | 15600 | 15200 | 15100 | 21800 | 596.1 | 2380.3 | 4 | 0.0079 | 3.329 |
| 60S acidic ribosomal protein P2 OS=Homo sapiens GN=RPLP2 PE=1 SV=1 | sp P05387 RLA2_HUMAN,sp P42899 RLA2_BOVIN,tr F7CGS1 F7C | nIED<br>VIAQ<br>GIGk                    | 95% | 71.7 | 52.19453 | Ref | -0.51  | 0.65 | 0.24 | 0.39 | 0.5  | 0.39 | 0.49 | 4300  | 2620 | 6380  | 5400  | 6590  | 6200  | 5980  | 6390  | 933   | 1864.1 | 2 | 0.019  | 10.2  |
| 60S acidic ribosomal protein P2 OS=Homo sapiens GN=RPLP2 PE=1 SV=1 | sp P05387 RLA2_HUMAN,sp P42899 RLA2_BOVIN,tr F7CGS1 F7C | yVAS<br>YLLA<br>ALG<br>GNS<br>SPSA<br>k | 95% | 87.7 | 54.45084 | Ref | -0.53  | 0.3  | 0.25 | 0.34 | 0.61 | 0.61 | 0.71 | 357   | 256  | 494   | 536   | 631   | 665   | 695   | 735   | 826.5 | 2476.4 | 3 | 0.0194 | 7.828 |
| 60S acidic ribosomal protein P2 OS=Homo sapiens GN=RPLP2 PE=1 SV=1 | sp P05387 RLA2_HUMAN,sp P42899 RLA2_BOVIN,tr F7CGS1 F7C | yVAS<br>YLLA<br>ALG<br>GNS<br>SPSA<br>k | 95% | 66.8 | 54.32204 | Ref | -0.043 | 0.38 | 0.45 | 0.31 | 0.31 | 0.23 | 0.49 | 171   | 121  | 176   | 207   | 206   | 181   | 179   | 212   | 826.5 | 2476.4 | 3 | 0.0148 | 5.987 |

|                                                                               |                                                                                                                                                                                                                |                                         |     |      |          |     |      |       |      |       |       |       |       |      |      |      |      |      |      |      |      |       |        |   |        |       |
|-------------------------------------------------------------------------------|----------------------------------------------------------------------------------------------------------------------------------------------------------------------------------------------------------------|-----------------------------------------|-----|------|----------|-----|------|-------|------|-------|-------|-------|-------|------|------|------|------|------|------|------|------|-------|--------|---|--------|-------|
| 60S acidic ribosomal protein P2 OS=Homo sapiens GN=RPLP2 PE=1 SV=1            | sp P05387 RLA2_HUMAN,sp P42899 RLA2_BOVIN,tr F7CGS1 F7CGS1_MAC MU,tr Q6FG96 Q6FG96_HUMAN                                                                                                                       | yVAS<br>YLLA<br>ALG<br>GNS<br>SPSA<br>k | 86% | 40.7 | 53.37489 | Ref | 0.11 | 0.33  | 0.2  | 0.17  | 0.29  | 0.53  | 0.62  | 696  | 608  | 765  | 784  | 850  | 805  | 992  | 1050 | 696.1 | 2780.6 | 4 | 0.0184 | 6.629 |
| Probable ATP-dependent RNA helicase DDX5 OS=Pan troglodytes GN=DDX5 PE=2 SV=1 | 2 DDX5_PANTR,sp P17844 DDX5_HUMAN,sp Q4R6M5 DDX5_MACFA,sp Q5R4I9 DDX5_PONAB,sp Q61656 DDX5_MOUSE,tr A1L333 A1L333_MOUSE,tr B4DLW8 B4DLW8_HUMAN,tr B4DN41 B4DN41_HUMAN, N, tr B4DNG2 B4DNG2_HUMAN, tr B5BUE6 B5 | aPILI<br>ATD<br>VAS<br>R                | 82% | 37.2 | 51.3477  | Ref | 0.11 | -0.25 | -0.1 | -0.18 | -0.25 | -0.13 | -0.08 | 5090 | 4780 | 4040 | 5040 | 5230 | 4360 | 4930 | 5070 | 766   | 1529.9 | 2 | 0.0112 | 7.323 |

|                                                                                      |                                                                                                                                                                                                                                                           |                                    |            |             |                 |            |             |              |              |               |              |              |              |              |              |              |              |              |              |              |              |              |               |          |               |              |
|--------------------------------------------------------------------------------------|-----------------------------------------------------------------------------------------------------------------------------------------------------------------------------------------------------------------------------------------------------------|------------------------------------|------------|-------------|-----------------|------------|-------------|--------------|--------------|---------------|--------------|--------------|--------------|--------------|--------------|--------------|--------------|--------------|--------------|--------------|--------------|--------------|---------------|----------|---------------|--------------|
| <p>Probable ATP-dependent RNA helicase DDX5 OS=Pan troglodytes GN=DDX5 PE=2 SV=1</p> | <p>2 DDX5_PANTR,sp P17844 DDX5_HUMAN,sp Q4R6M5 DDX5_MA CFA,sp Q5R4I9 DDX5_PONAB,sp Q61656 DDX5_MOUSE,transcript A1L333 A1L333_MOUSE,transcript B4DLW8 B4DLW8_HUMAN,transcript B4DN41 B4DN41_HUMAN,transcript B4DNG2 B4DNG2_HUMAN,transcript B5BUE6 B5</p> | <p>aPILI<br/>ATD<br/>VAS<br/>R</p> | <p>82%</p> | <p>37.1</p> | <p>50.97868</p> | <p>Ref</p> | <p>0.14</p> | <p>-0.42</p> | <p>-0.02</p> | <p>-0.042</p> | <p>-0.07</p> | <p>-0.28</p> | <p>-0.1</p>  | <p>8260</p>  | <p>8630</p>  | <p>6330</p>  | <p>9400</p>  | <p>10200</p> | <p>8720</p>  | <p>7870</p>  | <p>8880</p>  | <p>766</p>   | <p>1529.9</p> | <p>2</p> | <p>0.0019</p> | <p>1.261</p> |
| <p>Probable ATP-dependent RNA helicase DDX5 OS=Pan troglodytes GN=DDX5 PE=2 SV=1</p> | <p>2 DDX5_PANTR,sp P17844 DDX5_HUMAN,sp Q4R6M5 DDX5_MA CFA,sp Q5R4I9 DDX5_PONAB,sp Q61656 DDX5_MOUSE,transcript A1L333 A1L333_MOUSE,transcript B4DLW8 B4DLW8_HUMAN,transcript B4DN41 B4DN41_HUMAN,transcript B4DNG2 B4DNG2_HUMAN,transcript B5BUE6 B5</p> | <p>gLDV<br/>EDV</p>                | <p>83%</p> | <p>38.4</p> | <p>51.94581</p> | <p>Ref</p> | <p>0.12</p> | <p>-0.22</p> | <p>-0.11</p> | <p>-0.16</p>  | <p>-0.09</p> | <p>-0.28</p> | <p>-0.19</p> | <p>25100</p> | <p>23200</p> | <p>19900</p> | <p>24100</p> | <p>25700</p> | <p>23500</p> | <p>21500</p> | <p>22700</p> | <p>741.9</p> | <p>1481.9</p> | <p>2</p> | <p>0.0052</p> | <p>3.526</p> |

|                                                                                        |                                                                                                                                                                                                                                                       |          |     |      |          |     |      |       |       |       |       |       |       |       |       |      |       |       |      |       |       |       |        |   |        |       |
|----------------------------------------------------------------------------------------|-------------------------------------------------------------------------------------------------------------------------------------------------------------------------------------------------------------------------------------------------------|----------|-----|------|----------|-----|------|-------|-------|-------|-------|-------|-------|-------|-------|------|-------|-------|------|-------|-------|-------|--------|---|--------|-------|
| Probable ATP-dependent RNA helicase DDX5<br>OS=Pan troglodytes<br>GN=DDX5 PE=2<br>SV=1 | 2 DDX5_PANTR,sp P17844 DDX5_HUMAN,sp Q4R6M5 DDX5_MA CFA,sp Q5R4I9 DDX5_PONAB,sp Q61656 DDX5_MOUSE,transcript A1L333 A1L333_MOUSE,transcript B4DLW8 B4DLW8_HUMAN,transcript B4DN41 B4DN41_HUMAN,transcript B4DNG2 B4DNG2_HUMAN,transcript B5BUE6 B5R   | ILQLVED  | 54% | 31   | 51.19583 | Ref | 0.17 | -0.32 | 0.094 | -0.27 | -0.19 | -0.31 | -0.03 | 6640  | 6800  | 5260 | 7860  | 6710  | 6230 | 5970  | 7200  | 645.4 | 1288.7 | 2 | 0.0161 | 12.48 |
|                                                                                        | 2 DDX5_PANTR,sp P17844 DDX5_HUMAN,sp Q4R6M5 DDX5_MA CFA,sp Q5R4I9 DDX5_PONAB,sp Q61656 DDX5_MOUSE,transcript A1L333 A1L333_MOUSE,transcript B4DLW8 B4DLW8_HUMAN,transcript B4DN41 B4DN41_HUMAN,transcript B4DNG2 B4DNG2_HUMAN,transcript B5BUE6 B5ADR | tTYLVLDE | 95% | 65.5 | 52.33565 | Ref | 0.26 | -0.3  | 0.033 | -0.41 | -0.3  | -0.15 | -0.16 | 12200 | 12200 | 8940 | 12700 | 10300 | 9710 | 11300 | 11000 | 800.4 | 1598.8 | 2 | 0.0096 | 6.008 |

|                                                                    |                                                                                                                                                                                                                                                                                                                                  |                                   |     |      |          |     |      |       |       |        |      |       |       |      |      |      |      |      |      |      |      |       |        |   |        |       |
|--------------------------------------------------------------------|----------------------------------------------------------------------------------------------------------------------------------------------------------------------------------------------------------------------------------------------------------------------------------------------------------------------------------|-----------------------------------|-----|------|----------|-----|------|-------|-------|--------|------|-------|-------|------|------|------|------|------|------|------|------|-------|--------|---|--------|-------|
| 14-3-3 protein<br>epsilon OS=Homo<br>sapiens GN=YWHAE<br>PE=1 SV=1 | 8 1433E_<br>HUMAN,s<br>p P62259<br> 1433E_<br>MOUSE,s<br>p P62260<br> 1433E_R<br>AT,sp P62<br>261 1433<br>E_BOVIN,<br>sp P6226<br>2 1433E_<br>SHEEP,tr <br>E2QWD6 <br>E2QWD6_<br>CANFA,tr <br>F6XA04 F<br>6XA04_H<br>ORSE,tr F<br>7FT92 F7<br>FT92_OR<br>NAN,tr F7<br>GZ27 F7G<br>Z27_CALJ<br>A,tr F7HJ<br>T3 F7HJT<br>3_CALJA,t | aASD<br>IAM<br>TELP<br>PTHP<br>IR | 95% | 55.3 | 54.24495 | Ref | 0.24 | -0.02 | -0.03 | -0.099 | 0.11 | -0.03 | -0.01 | 7320 | 7490 | 6810 | 7590 | 7970 | 8020 | 7660 | 7660 | 708.7 | 2123.1 | 3 | 0.0174 | 8.179 |
| 14-3-3 protein<br>epsilon OS=Homo<br>sapiens GN=YWHAE<br>PE=1 SV=1 | 8 1433E_<br>HUMAN,s<br>p P62259<br> 1433E_<br>MOUSE,s<br>p P62260<br> 1433E_R<br>AT,sp P62<br>261 1433<br>E_BOVIN,<br>sp P6226<br>2 1433E_<br>SHEEP,tr <br>E2QWD6 <br>E2QWD6_<br>CANFA,tr <br>F6XA04 F<br>6XA04_H<br>ORSE,tr F<br>7FT92 F7<br>FT92_OR<br>NAN,tr F7<br>GZ27 F7G<br>Z27_CALJ<br>A,tr F7HJ<br>T3 F7HJT<br>3_CALJA,t | aASD<br>IAM<br>TELP<br>PTHP<br>IR | 95% | 73.8 | 54.23148 | Ref | 0.32 | 0.013 | 0.093 | -0.23  | -0.1 | 0.079 | -0.06 | 7120 | 7720 | 6770 | 8030 | 7060 | 6770 | 7990 | 7230 | 708.7 | 2123.1 | 3 | 0.0092 | 4.309 |

|                                                                    |                                                                                                                                                                                                                                                                                                                                  |                           |     |      |          |     |       |       |      |        |     |       |      |       |      |       |       |       |       |       |       |       |        |   |        |       |
|--------------------------------------------------------------------|----------------------------------------------------------------------------------------------------------------------------------------------------------------------------------------------------------------------------------------------------------------------------------------------------------------------------------|---------------------------|-----|------|----------|-----|-------|-------|------|--------|-----|-------|------|-------|------|-------|-------|-------|-------|-------|-------|-------|--------|---|--------|-------|
| 14-3-3 protein<br>epsilon OS=Homo<br>sapiens GN=YWHAE<br>PE=1 SV=1 | 8 1433E_<br>HUMAN,s<br>p P62259<br> 1433E_<br>MOUSE,s<br>p P62260<br> 1433E_R<br>AT,sp P62<br>261 1433<br>E_BOVIN,<br>sp P6226<br>2 1433E_<br>SHEEP,tr <br>E2QWD6 <br>E2QWD6_<br>CANFA,tr <br>F6XA04 F<br>6XA04_H<br>ORSE,tr F<br>7FT92 F7<br>FT92_OR<br>NAN,tr F7<br>GZ27 F7G<br>Z27_CALJ<br>A,tr F7HJ<br>T3 F7HJT<br>3_CALJA,t | eAAE<br>nSLV<br>AYk       | 70% | 36.5 | 53.39974 | Ref | -0.07 | -0.13 | 0.18 | -0.033 | 0.2 | -0.13 | 0.15 | 11300 | 9630 | 10100 | 14000 | 13300 | 13600 | 11300 | 13700 | 602   | 1803   | 3 | 0.0126 | 6.999 |
| 14-3-3 protein<br>epsilon OS=Homo<br>sapiens GN=YWHAE<br>PE=1 SV=1 | 8 1433E_<br>HUMAN,s<br>p P62259<br> 1433E_<br>MOUSE,s<br>p P62260<br> 1433E_R<br>AT,sp P62<br>261 1433<br>E_BOVIN,<br>sp P6226<br>2 1433E_<br>SHEEP,tr <br>E2QWD6 <br>E2QWD6_<br>CANFA,tr <br>F6XA04 F<br>6XA04_H<br>ORSE,tr F<br>7FT92 F7<br>FT92_OR<br>NAN,tr F7<br>GZ27 F7G<br>Z27_CALJ<br>A,tr F7HJ<br>T3 F7HJT<br>3_CALJA,t | VAG<br>MDV<br>ELTV<br>EER | 95% | 49.6 | 52.7187  | Ref | 0.21  | -0.29 | 0.18 | -0.14  | 0.2 | -0.42 | 0.13 | 5860  | 5250 | 4040  | 6260  | 5560  | 6130  | 4170  | 6050  | 876.5 | 1750.9 | 2 | 0.0127 | 7.227 |



|                                                                                         |                                                                                                                                                                                                                                                                                                                                  |                           |     |      |          |     |       |       |       |        |      |       |       |       |       |       |       |       |       |       |       |       |        |   |        |       |
|-----------------------------------------------------------------------------------------|----------------------------------------------------------------------------------------------------------------------------------------------------------------------------------------------------------------------------------------------------------------------------------------------------------------------------------|---------------------------|-----|------|----------|-----|-------|-------|-------|--------|------|-------|-------|-------|-------|-------|-------|-------|-------|-------|-------|-------|--------|---|--------|-------|
| 14-3-3 protein<br>epsilon OS=Homo<br>sapiens GN=YWHAE<br>PE=1 SV=1                      | 8 1433E_<br>HUMAN,s<br>p P62259<br> 1433E_<br>MOUSE,s<br>p P62260<br> 1433E_R<br>AT,sp P62<br>261 1433<br>E_BOVIN,<br>sp P6226<br>2 1433E_<br>SHEEP,tr <br>E2QWD6 <br>E2QWD6_<br>CANFA,tr <br>F6XA04 F<br>6XA04_H<br>ORSE,tr F<br>7FT92 F7<br>FT92_OR<br>NAN,tr F7<br>GZ27 F7G<br>Z27_CALJ<br>A,tr F7HJ<br>T3 F7HJT<br>3_CALJA,t | vAG<br>MDV<br>ELTV<br>EER | 82% | 38.7 | 52.74334 | Ref | 0.2   | -0.19 | 0.096 | -0.084 | 0.27 | -0.23 | 0.057 | 3070  | 3090  | 2560  | 3500  | 3400  | 3790  | 2800  | 3390  | 876.5 | 1750.9 | 2 | 0.0105 | 5.983 |
| Peptidyl-prolyl cis-<br>trans isomerase<br>FKBP3 OS=Bos<br>taurus GN=FKBP3<br>PE=1 SV=2 | sp P2688<br>4 FKBP3_<br>BOVIN,tr <br>D2I0W1 <br>D2I0W1_<br>AILME,tr <br>F6SLA3 F<br>6SLA3_H<br>ORSE                                                                                                                                                                                                                              | ILGN<br>Ik                | 70% | 28.3 | 45.07694 | Ref | -0.38 | -0.42 | -0.12 | -0.24  | 0.34 | -0.58 | 0.096 | 20800 | 14700 | 15500 | 21400 | 21700 | 28400 | 15700 | 24800 | 422.6 | 1264.8 | 3 | 0.0029 | 2.256 |
| Peptidyl-prolyl cis-<br>trans isomerase<br>FKBP3 OS=Bos<br>taurus GN=FKBP3<br>PE=1 SV=2 | sp P2688<br>4 FKBP3_<br>BOVIN,tr <br>D2I0W1 <br>D2I0W1_<br>AILME,tr <br>F6SLA3 F<br>6SLA3_H<br>ORSE                                                                                                                                                                                                                              | ILGN<br>Ik                | 63% | 26.8 | 45.07694 | Ref | -0.25 | -0.38 | -0.14 | -0.29  | 0.22 | -0.58 | 0.15  | 2530  | 1940  | 1930  | 2560  | 2530  | 3160  | 1900  | 3120  | 422.6 | 1264.8 | 3 | 0.0016 | 1.237 |

|                                                                                     |                                                                     |                     |     |      |          |     |        |       |       |       |      |       |       |       |       |       |       |       |       |       |       |       |        |   |        |       |
|-------------------------------------------------------------------------------------|---------------------------------------------------------------------|---------------------|-----|------|----------|-----|--------|-------|-------|-------|------|-------|-------|-------|-------|-------|-------|-------|-------|-------|-------|-------|--------|---|--------|-------|
| Peptidyl-prolyl cis-trans isomerase<br>FKBP3 OS=Bos<br>taurus GN=FKBP3<br>PE=1 SV=2 | sp P26884 FKBP3_BOVIN,tr D2I0W1 D2I0W1_AILME,tr F6SLA3 F6SLA3_HORSE | sEET<br>LDEG<br>PPk | 95% | 63.5 | 53.35466 | Ref | -0.27  | -0.14 | -0.01 | -0.19 | 0.24 | -0.59 | -0.41 | 53500 | 37400 | 44300 | 54700 | 53200 | 62700 | 36600 | 41400 | 604   | 1808.9 | 3 | 0.0166 | 9.174 |
| Peptidyl-prolyl cis-trans isomerase<br>FKBP3 OS=Bos<br>taurus GN=FKBP3<br>PE=1 SV=2 | sp P26884 FKBP3_BOVIN,tr D2I0W1 D2I0W1_AILME,tr F6SLA3 F6SLA3_HORSE | sEET<br>LDEG<br>PPk | 91% | 44.6 | 53.37351 | Ref | -0.095 | -0.41 | -0.16 | -0.19 | 0.29 | -0.9  | -0.17 | 18300 | 13200 | 11600 | 15400 | 16700 | 20300 | 9290  | 15300 | 905.5 | 1808.9 | 2 | 0.015  | 8.286 |
| Peptidyl-prolyl cis-trans isomerase<br>FKBP3 OS=Bos<br>taurus GN=FKBP3<br>PE=1 SV=2 | sp P26884 FKBP3_BOVIN,tr D2I0W1 D2I0W1_AILME,tr F6SLA3 F6SLA3_HORSE | vGIG<br>KVIR        | 94% | 41.9 | 43.85696 | Ref | -0.07  | -0.31 | -0.1  | -0.46 | 0.23 | -0.33 | -0.25 | 6400  | 5300  | 4860  | 6330  | 5420  | 7650  | 5420  | 5690  | 382.6 | 1144.8 | 3 | 0.0063 | 5.524 |

|                                           |                                                                                                                                                                                                                                                                                                                                   |                            |     |      |          |     |                                           |                                                |                                                    |                                                     |                                                     |                                                         |                                                     |                                                      |                                                   |                                                   |                                                          |                                                    |                                                   |                                                   |       |        |        |        |        |       |
|-------------------------------------------|-----------------------------------------------------------------------------------------------------------------------------------------------------------------------------------------------------------------------------------------------------------------------------------------------------------------------------------|----------------------------|-----|------|----------|-----|-------------------------------------------|------------------------------------------------|----------------------------------------------------|-----------------------------------------------------|-----------------------------------------------------|---------------------------------------------------------|-----------------------------------------------------|------------------------------------------------------|---------------------------------------------------|---------------------------------------------------|----------------------------------------------------------|----------------------------------------------------|---------------------------------------------------|---------------------------------------------------|-------|--------|--------|--------|--------|-------|
| Destrin OS=Homo sapiens GN=DSTN PE=1 SV=3 | 1 DEST_H<br>UMAN,sp<br> P60982 <br>DEST_PIG,<br>sp Q5E9D<br>5 DEST_B<br>OVIN,tr B<br>4DYA6 B4<br>DYA6_HU<br>MAN,tr B<br>7Z9M9 B<br>7Z9M9_H<br>UMAN,tr <br>D2HRE4 <br>D2HRE4_<br>AILME,tr <br>F2Z4P7 F<br>2Z4P7_CA<br>NFA,tr F2<br>Z5I9 F2Z5<br>I9_PIG,tr <br>F6TEG7 F<br>6TEG7_M<br>ACMU,tr <br>F7CL80 F<br>7CL80_HO<br>RSE,tr F7 | hEcQ<br>AnG<br>PEDL<br>NR  | 92% | 41.1 | 46.42494 | Ref | -0.07                                     | -0.37                                          | -0.24                                              | -0.64                                               | -0.52                                               | -0.31                                                   | -0.68                                               | 16800                                                | 14500                                             | 12800                                             | 15700                                                    | 13200                                              | 12500                                             | 15000                                             | 11600 | 611.9  | 1832.8 | 3      | 0.0131 | 7.148 |
| Destrin OS=Homo sapiens GN=DSTN PE=1 SV=3 | 1 DEST_H<br>UMAN,sp<br> P60982 <br>DEST_PIG,<br>sp Q5E9D<br>5 DEST_B<br>OVIN,tr B<br>4DYA6 B4<br>DYA6_HU<br>MAN,tr B<br>7Z9M9 B<br>7Z9M9_H<br>UMAN,tr <br>D2HRE4 <br>D2HRE4_<br>AILME,tr <br>F2Z4P7 F<br>2Z4P7_CA<br>NFA,tr F2<br>Z5I9 F2Z5<br>I9_PIG,tr <br>F6TEG7 F<br>6TEG7_M<br>ACMU,tr <br>F7CL80 F<br>7CL80_HO<br>RSE,tr F7 | IGGS<br>LIVA<br>FEGC<br>PV | 95% | 49.6 | 52.72596 | Ref | Value<br>Missing<br>(-<br>0.2434<br>3146) | Value<br>Missi<br>ng (-<br>0.361<br>12487<br>) | Value<br>Missi<br>ng (-<br>0.527<br>0.527<br>7197) | Value<br>Missin<br>g (-<br>0.6681<br>0.6681<br>989) | Value<br>Missin<br>g (-<br>0.4723<br>0.4723<br>265) | Value<br>Missi<br>ng (-<br>0.535<br>0.535<br>09325<br>) | Value<br>Missin<br>g (-<br>0.5242<br>0.5242<br>191) | Value<br>Missi<br>ng (-<br>0.243431<br>0.243431<br>) | Value<br>Missi<br>ng (-<br>0.361<br>12487<br>197) | Value<br>Missi<br>ng (-<br>0.5277<br>0.5277<br>9) | Value<br>Missi<br>ng (-<br>0.668198<br>0.668198<br>3265) | Value<br>Missi<br>ng (-<br>0.472<br>0.472<br>9325) | Value<br>Missin<br>g (-<br>0.5350<br>0.5350<br>1) | Value<br>Missing (-<br>0.524219<br>0.524219<br>1) | 856.4 | 1710.9 | 2      | 0.0184 | 10.76  |       |

|                                           |                                                                                                                                                                                                                                                                                                                                   |                            |     |      |          |     |                                       |                                       |                                       |                                       |                                      |                                       |                                       |                                       |                                       |                                       |                                      |                                       |                                       |                                      |                                       |       |        |   |        |       |
|-------------------------------------------|-----------------------------------------------------------------------------------------------------------------------------------------------------------------------------------------------------------------------------------------------------------------------------------------------------------------------------------|----------------------------|-----|------|----------|-----|---------------------------------------|---------------------------------------|---------------------------------------|---------------------------------------|--------------------------------------|---------------------------------------|---------------------------------------|---------------------------------------|---------------------------------------|---------------------------------------|--------------------------------------|---------------------------------------|---------------------------------------|--------------------------------------|---------------------------------------|-------|--------|---|--------|-------|
| Destrin OS=Homo sapiens GN=DSTN PE=1 SV=3 | 1 DEST_H<br>UMAN,sp<br> P60982 <br>DEST_PIG,<br>sp Q5E9D<br>5 DEST_B<br>OVIN,tr B<br>4DYA6 B4<br>DYA6_HU<br>MAN,tr B<br>7Z9M9 B<br>7Z9M9_H<br>UMAN,tr <br>D2HRE4 <br>D2HRE4_<br>AILME,tr <br>F2Z4P7 F<br>2Z4P7_CA<br>NFA,tr F2<br>Z5I9 F2Z5<br>I9_PIG,tr <br>F6TEG7 F<br>6TEG7_M<br>ACMU,tr <br>F7CL80 F<br>7CL80_HO<br>RSE,tr F7 | IGGS<br>LIVA<br>FEGc<br>PV | 75% | 36.7 | 52.87634 | Ref | No<br>Values<br>(-<br>0.1211<br>4624) | No<br>Value<br>s (-<br>0.238<br>8396) | No<br>Value<br>s (-<br>0.405<br>4346) | No<br>Values<br>(-<br>0.5459<br>1376) | No<br>Values<br>(-<br>0.3500<br>413) | No<br>Value<br>s (-<br>0.412<br>8079) | No<br>Values<br>(-<br>0.4019<br>3376) | No<br>Values<br>(-<br>0.3235<br>3625) | No<br>Values<br>(-<br>0.121146<br>24) | No<br>Value<br>s (-<br>0.238<br>8396) | No<br>Values<br>(-<br>0.4054<br>346) | No<br>Values<br>(-<br>0.545913<br>76) | No<br>Value<br>s (-<br>0.350<br>0413) | No<br>Values<br>(-<br>0.4128<br>079) | No<br>Values<br>(-<br>0.401933<br>76) | 856.5 | 1710.9 | 2 | 0.0095 | 5.547 |
|                                           |                                                                                                                                                                                                                                                                                                                                   |                            |     |      |          |     |                                       |                                       |                                       |                                       |                                      |                                       |                                       |                                       |                                       |                                       |                                      |                                       |                                       |                                      |                                       |       |        |   |        |       |
| Destrin OS=Homo sapiens GN=DSTN PE=1 SV=3 | 1 DEST_H<br>UMAN,sp<br> P60982 <br>DEST_PIG,<br>sp Q5E9D<br>5 DEST_B<br>OVIN,tr B<br>4DYA6 B4<br>DYA6_HU<br>MAN,tr B<br>7Z9M9 B<br>7Z9M9_H<br>UMAN,tr <br>D2HRE4 <br>D2HRE4_<br>AILME,tr <br>F2Z4P7 F<br>2Z4P7_CA<br>NFA,tr F2<br>Z5I9 F2Z5<br>I9_PIG,tr <br>F6TEG7 F<br>6TEG7_M<br>ACMU,tr <br>F7CL80 F<br>7CL80_HO<br>RSE,tr F7 | yALY<br>DASF<br>ETK        | 71% | 37   | 53.46781 | Ref | -0.18                                 | -0.86                                 | -0.59                                 | -0.34                                 | -0.41                                | -0.47                                 | -0.17                                 | 5050                                  | 3730                                  | 2510                                  | 3420                                 | 4490                                  | 3730                                  | 3730                                 | 4550                                  | 639.3 | 1915   | 3 | 0.0177 | 9.237 |

|                                                                    |                                                                                                                                                                                                                                                                                                                                   |                     |     |      |          |     |       |       |       |       |       |       |       |      |      |      |      |      |      |      |      |       |        |   |        |       |
|--------------------------------------------------------------------|-----------------------------------------------------------------------------------------------------------------------------------------------------------------------------------------------------------------------------------------------------------------------------------------------------------------------------------|---------------------|-----|------|----------|-----|-------|-------|-------|-------|-------|-------|-------|------|------|------|------|------|------|------|------|-------|--------|---|--------|-------|
| Destrin OS=Homo sapiens GN=DSTN PE=1 SV=3                          | 1 DEST_H<br>UMAN,sp<br> P60982 <br>DEST_PIG,<br>sp Q5E9D<br>5 DEST_B<br>OVIN,tr B<br>4DYA6 B4<br>DYA6_HU<br>MAN,tr B<br>7Z9M9 B<br>7Z9M9_H<br>UMAN,tr <br>D2HRE4 <br>D2HRE4_<br>AILME,tr <br>F2Z4P7 F<br>2Z4P7_CA<br>NFA,tr F2<br>Z5I9 F2Z5<br>I9_PIG,tr <br>F6TEG7 F<br>6TEG7_M<br>ACMU,tr <br>F7CL80 F<br>7CL80_HO<br>RSE,tr F7 | yALY<br>DASF<br>ETk | 71% | 37   | 53.48155 | Ref | -0.12 | -0.56 | -0.21 | -0.32 | -0.4  | -0.38 | -0.45 | 4780 | 4920 | 3940 | 5620 | 5750 | 4750 | 5020 | 4750 | 639.3 | 1915   | 3 | 0.0124 | 6.466 |
| Nucleoside diphosphate kinase OS=Bos taurus GN=NME1-NME2 PE=3 SV=1 | tr F1MPL<br>4 F1MPL4<br>BOVIN                                                                                                                                                                                                                                                                                                     | fLQA<br>SEEL<br>Lk  | 85% | 40.2 | 51.80516 | Ref | 0.13  | -0.43 | -0.29 | -0.4  | -0.39 | -0.37 | -0.73 | 2780 | 2010 | 1470 | 1820 | 1860 | 1630 | 1730 | 1340 | 596   | 1785   | 3 | 0.0104 | 5.797 |
| Nucleoside diphosphate kinase OS=Bos taurus GN=NME1-NME2 PE=3 SV=1 | tr F1MPL<br>4 F1MPL4<br>BOVIN                                                                                                                                                                                                                                                                                                     | gLM<br>GEIk         | 54% | 30.5 | 50.51017 | Ref | 0.047 | -0.45 | -0.23 | -0.36 | -0.32 | -0.05 | -0.2  | 1670 | 1790 | 1380 | 1800 | 1820 | 1620 | 2050 | 1830 | 490.3 | 1467.9 | 3 | 0.0026 | 1.752 |

|                                                                             |                        |                                   |     |      |          |     |        |       |       |        |       |       |       |       |       |       |       |       |       |       |       |       |        |   |        |       |
|-----------------------------------------------------------------------------|------------------------|-----------------------------------|-----|------|----------|-----|--------|-------|-------|--------|-------|-------|-------|-------|-------|-------|-------|-------|-------|-------|-------|-------|--------|---|--------|-------|
| Nucleoside diphosphate kinase<br>OS=Bos taurus<br>GN=NME1-NME2<br>PE=3 SV=1 | tr F1MPL4 F1MPL4_BOVIN | gLM<br>GEIk                       | 65% | 32.7 | 50.60104 | Ref | -0.061 | -0.54 | -0.23 | -0.32  | -0    | -0.27 | -0.29 | 19100 | 17100 | 13300 | 18500 | 19200 | 20900 | 18100 | 17800 | 490.3 | 1467.9 | 3 | 0.004  | 2.691 |
| Nucleoside diphosphate kinase<br>OS=Bos taurus<br>GN=NME1-NME2<br>PE=3 SV=1 | tr F1MPL4 F1MPL4_BOVIN | tFIAI<br>kPD<br>GVQ<br>R          | 90% | 41.8 | 51.50081 | Ref | -0.23  | -0.44 | -0.09 | -0.17  | -0.16 | -0.43 | -0.29 | 1630  | 1200  | 1130  | 1620  | 1680  | 1480  | 1280  | 1410  | 977.1 | 1952.2 | 2 | 0.0168 | 8.61  |
| Nucleoside diphosphate kinase<br>OS=Bos taurus<br>GN=NME1-NME2<br>PE=3 SV=1 | tr F1MPL4 F1MPL4_BOVIN | vmL<br>GET<br>NPA<br>DskP<br>GTIR | 67% | 37.2 | 54.6198  | Ref | -0.11  | -0.41 | -0.21 | -0.082 | -0.43 | -0.23 | -0.34 | 13800 | 11100 | 9730  | 12600 | 15200 | 10400 | 12500 | 11500 | 804.1 | 2409.3 | 3 | 0.0162 | 6.734 |



|                                                                                 |                                                                                                                                                                                                                 |                                                |     |      |          |     |       |       |       |        |      |       |      |      |      |      |      |      |      |      |      |       |        |   |        |       |
|---------------------------------------------------------------------------------|-----------------------------------------------------------------------------------------------------------------------------------------------------------------------------------------------------------------|------------------------------------------------|-----|------|----------|-----|-------|-------|-------|--------|------|-------|------|------|------|------|------|------|------|------|------|-------|--------|---|--------|-------|
| Heterogeneous nuclear ribonucleoprotein A3 OS=Homo sapiens GN=HNRNPA3 PE=1 SV=2 | 1 ROA3_HUMAN,sp Q6URK4 ROA3_RAT,sp Q8BG05 ROA3_MOUSE,trl A2AL12 A2AL12_MOUSE,trl B2R XM2 B2R XM2_MOUSE,trl B4DDB6 B4DDB6_HUMAN,trl B4E3E6 B4E3E6_HUMAN,trl D3ZJF4_RAT,trl D4ACQ0 D4ACQ0_RAT,trl E1BEG2 E1BEG2_B | sSGS<br>PYG<br>GGY<br>GSG<br>GGS<br>GGY<br>GSR | 95% | 52.2 | 47.66576 | Ref | 0.056 | -0.08 | -0.18 | -0.071 | 0.12 | 0.009 | 0.05 | 3900 | 3700 | 3670 | 3830 | 4550 | 4550 | 4390 | 4480 | 739   | 2214   | 3 | 0.0158 | 7.127 |
| Heterogeneous nuclear ribonucleoprotein A3 OS=Homo sapiens GN=HNRNPA3 PE=1 SV=2 | 1 ROA3_HUMAN,sp Q6URK4 ROA3_RAT,sp Q8BG05 ROA3_MOUSE,trl A2AL12 A2AL12_MOUSE,trl B2R XM2 B2R XM2_MOUSE,trl B4DDB6 B4DDB6_HUMAN,trl B4E3E6 B4E3E6_HUMAN,trl D3ZJF4_RAT,trl D4ACQ0 D4ACQ0_RAT,trl E1BEG2 E1BEG2_B | sSGS<br>PyG<br>GGY<br>GSG<br>GGS<br>GGY<br>GSR | 64% | 33.7 | 51.97873 | Ref | -0.15 | 0.12  | -0.32 | -0.13  | 0.13 | -0.3  | 0.38 | 1980 | 1550 | 2020 | 1670 | 2100 | 2210 | 1700 | 2710 | 840.4 | 2518.2 | 3 | 0.0142 | 5.618 |



|                                                                                        |                                                                                                                                                                                                                                                                                                    |                           |            |             |                 |            |             |              |              |               |              |              |              |              |              |              |             |              |              |              |              |              |             |          |               |              |
|----------------------------------------------------------------------------------------|----------------------------------------------------------------------------------------------------------------------------------------------------------------------------------------------------------------------------------------------------------------------------------------------------|---------------------------|------------|-------------|-----------------|------------|-------------|--------------|--------------|---------------|--------------|--------------|--------------|--------------|--------------|--------------|-------------|--------------|--------------|--------------|--------------|--------------|-------------|----------|---------------|--------------|
| <p>Heterogeneous nuclear ribonucleoprotein A3 OS=Homo sapiens GN=HNRNPA3 PE=1 SV=2</p> | <p>1 ROA3_HUMAN,sp Q6URK4 ROA3_RAT,sp Q8BG05 ROA3_MOUSE,transcript A2AL12 A2AL12_MOUSE,transcript B2R XM2 B2R XM2_MOUSE,transcript B4DDB6 B4DDB6_HUMAN,transcript B4E3E6 B4E3E6_HUMAN,transcript D3ZJF4 D3ZJF4_RAT,transcript D4ACQ0 D4ACQ0_RAT,transcript E1BEG2 E1BEG2_B</p>                     | <p>yHTInGH NCEV</p>       | <p>60%</p> | <p>33.8</p> | <p>52.62994</p> | <p>Ref</p> | <p>0.18</p> | <p>0.072</p> | <p>-0.29</p> | <p>-0.095</p> | <p>0.026</p> | <p>-0.07</p> | <p>0.036</p> | <p>10400</p> | <p>10600</p> | <p>10600</p> | <p>9240</p> | <p>11700</p> | <p>11100</p> | <p>10900</p> | <p>11600</p> | <p>690.7</p> | <p>2069</p> | <p>3</p> | <p>0.0205</p> | <p>9.908</p> |
| <p>Catenin delta-1 OS=Homo sapiens GN=CTNND1 PE=1 SV=1</p>                             | <p>6 CTND1_HUMAN,transcript C9JZR2 C9JZR2_HUMAN,transcript D2HK71 D2HK71_AILME,transcript E1BQ11 E1BQ11_BOVIN,transcript E2R434 E2R434_CANFA,transcript E9PIE5 E9PIE5_HUMAN,transcript F1SJY6 F1SJY6_PIG,transcript F6QHE6 F6QHE6_MCMU,transcript F6QHF6 F6QHF6_MCMU,transcript F6QHH2 F6QHH2_</p> | <p>aLSA IADL LTNE HER</p> | <p>95%</p> | <p>75.1</p> | <p>53.77472</p> | <p>Ref</p> | <p>0.3</p>  | <p>-0.58</p> | <p>0.2</p>   | <p>-0.2</p>   | <p>-0.01</p> | <p>-0.32</p> | <p>0.17</p>  | <p>315</p>   | <p>305</p>   | <p>180</p>   | <p>347</p>  | <p>291</p>   | <p>289</p>   | <p>244</p>   | <p>339</p>   | <p>653</p>   | <p>1956</p> | <p>3</p> | <p>0.0092</p> | <p>4.706</p> |

|                                                              |                                                                                                                                                                                                                                 |                             |     |      |          |     |      |                            |       |       |      |                           |                            |     |                            |     |     |     |                           |                            |     |        |      |       |        |       |
|--------------------------------------------------------------|---------------------------------------------------------------------------------------------------------------------------------------------------------------------------------------------------------------------------------|-----------------------------|-----|------|----------|-----|------|----------------------------|-------|-------|------|---------------------------|----------------------------|-----|----------------------------|-----|-----|-----|---------------------------|----------------------------|-----|--------|------|-------|--------|-------|
| Catenin delta-1<br>OS=Homo sapiens<br>GN=CTNND1 PE=1<br>SV=1 | 6 CTND1_HUMAN, tr C9JZR2 C9JZR2_HUMAN, tr D2HK71 D2HK71_AILME, tr E1BQ11 E1BQ11_BOVIN, tr E2R434 E2R434_CANFA, tr E9PIE5 E9PIE5_HUMAN, tr F1SY6 F1SY6_PIG, tr F6QHE6 F6QHE6_MACMU, tr F6QHF6 F6QHF6_MACMU, tr F6QHH2 F6QHH2_HER | aLSA<br>IADL<br>LTNE<br>HER | 95% | 60.2 | 53.84113 | Ref | 0.46 | Value Missing (-1.8965379) | 0.72  | 0.54  | 0.45 | Value Missing (-2.070506) | Value Missing (-2.0596323) | 181 | Value Missing (-1.8965379) | 233 | 226 | 186 | Value Missing (-2.070506) | Value Missing (-2.0596323) | 653 | 1956.1 | 3    | ##### | 0.49   |       |
| Catenin delta-1<br>OS=Homo sapiens<br>GN=CTNND1 PE=1<br>SV=1 | 6 CTND1_HUMAN, tr C9JZR2 C9JZR2_HUMAN, tr D2HK71 D2HK71_AILME, tr E1BQ11 E1BQ11_BOVIN, tr E2R434 E2R434_CANFA, tr E9PIE5 E9PIE5_HUMAN, tr F1SY6 F1SY6_PIG, tr F6QHE6 F6QHE6_MACMU, tr F6QHF6 F6QHF6_MACMU, tr F6QHH2 F6QHH2_HER | aLSA<br>IADL<br>LTNE<br>HER | 95% | 66.1 | 53.77423 | Ref | 0.61 | 0.52                       | -0.44 | -0.18 | -0.2 | -0.2                      | -0.39                      | 267 | 410                        | 419 | 242 | 319 | 274                       | 287                        | 250 | 653    | 1956 | 3     | 0.0152 | 7.787 |

|                                                                        |                                                                                                                                                                                                                                      |                                                            |            |             |                 |            |             |              |              |              |              |              |              |              |              |              |              |              |              |              |              |              |               |          |               |              |
|------------------------------------------------------------------------|--------------------------------------------------------------------------------------------------------------------------------------------------------------------------------------------------------------------------------------|------------------------------------------------------------|------------|-------------|-----------------|------------|-------------|--------------|--------------|--------------|--------------|--------------|--------------|--------------|--------------|--------------|--------------|--------------|--------------|--------------|--------------|--------------|---------------|----------|---------------|--------------|
| <p>Catenin delta-1<br/>OS=Homo sapiens<br/>GN=CTNND1 PE=1<br/>SV=1</p> | <p>6 CTND1_HUMAN, tr C9JZR2 C9JZR2_HUMAN, tr D2HK71 D2HK71_AILME, tr E1BQ11 E1BQ11_BOVIN, tr E2R434 E2R434_CANFA, tr E9PIE5 E9PIE5_HUMAN, tr F1SY6 F1SY6_PIG, tr F6QHE6 F6QHE6_MACMU, tr F6QHF6 F6QHF6_MACMU, tr F6QHH2 F6QHH2_R</p> | <p>knGn<br/>GGP<br/>GPY<br/>VGQ<br/>AGT<br/>ATLP<br/>R</p> | <p>90%</p> | <p>47</p>   | <p>55.05709</p> | <p>Ref</p> | <p>0.12</p> | <p>-0.37</p> | <p>0.039</p> | <p>-0.21</p> | <p>0.28</p>  | <p>-0.49</p> | <p>0.35</p>  | <p>5270</p>  | <p>4980</p>  | <p>3840</p>  | <p>5730</p>  | <p>5310</p>  | <p>6530</p>  | <p>3990</p>  | <p>7090</p>  | <p>874.8</p> | <p>2621.4</p> | <p>3</p> | <p>0.0168</p> | <p>6.421</p> |
| <p>Catenin delta-1<br/>OS=Homo sapiens<br/>GN=CTNND1 PE=1<br/>SV=1</p> | <p>6 CTND1_HUMAN, tr C9JZR2 C9JZR2_HUMAN, tr D2HK71 D2HK71_AILME, tr E1BQ11 E1BQ11_BOVIN, tr E2R434 E2R434_CANFA, tr E9PIE5 E9PIE5_HUMAN, tr F1SY6 F1SY6_PIG, tr F6QHE6 F6QHE6_MACMU, tr F6QHF6 F6QHF6_MACMU, tr F6QHH2 F6QHH2_R</p> | <p>nLAV<br/>DAR</p>                                        | <p>57%</p> | <p>29.7</p> | <p>49.40512</p> | <p>Ref</p> | <p>0.26</p> | <p>-0.09</p> | <p>0.27</p>  | <p>-0.16</p> | <p>-0.08</p> | <p>-0.51</p> | <p>0.096</p> | <p>19900</p> | <p>20800</p> | <p>17700</p> | <p>25400</p> | <p>20700</p> | <p>19200</p> | <p>14800</p> | <p>22500</p> | <p>531.8</p> | <p>1061.6</p> | <p>2</p> | <p>0.0089</p> | <p>8.366</p> |

|                                                            |                                                                                                                                                                                                                    |                |     |      |          |     |      |       |      |       |       |       |       |       |       |       |       |       |       |       |       |       |        |   |        |       |
|------------------------------------------------------------|--------------------------------------------------------------------------------------------------------------------------------------------------------------------------------------------------------------------|----------------|-----|------|----------|-----|------|-------|------|-------|-------|-------|-------|-------|-------|-------|-------|-------|-------|-------|-------|-------|--------|---|--------|-------|
| 40S ribosomal protein S20 OS=Sus scrofa GN=RPS20 PE=3 SV=1 | U9 RS20_PIG,sp P60866 RS20_HUMAN,sp P60867 RS20_MOUSE,sp P60868 RS20_RAT,sp Q3ZBH8 RS20_BOVIN,sp Q4R5D0 RS20_MACFA,sp Q5R924 RS20_PONAB,tr B4DW28 B4DW28_HUMAN,tr D2H950 D2H950_AILME,tr D3ZZK1 D3ZZK1_RAT,tr E2RB | IIDLH SPSE IVk | 69% | 33.5 | 52.56843 | Ref | 0.29 | -0.22 | 0.36 | 0.12  | 0.019 | -0.25 | 0.036 | 17300 | 17600 | 13400 | 22400 | 21100 | 17100 | 14800 | 17900 | 490.5 | 1958.2 | 4 | 0.0162 | 8.287 |
| 40S ribosomal protein S20 OS=Sus scrofa GN=RPS20 PE=3 SV=1 | U9 RS20_PIG,sp P60866 RS20_HUMAN,sp P60867 RS20_MOUSE,sp P60868 RS20_RAT,sp Q3ZBH8 RS20_BOVIN,sp Q4R5D0 RS20_MACFA,sp Q5R924 RS20_PONAB,tr B4DW28 B4DW28_HUMAN,tr D2H950 D2H950_AILME,tr D3ZZK1 D3ZZK1_RAT,tr E2RB | IIDLH SPSE IVk | 70% | 35.8 | 52.56634 | Ref | 0.39 | 0.028 | 0.31 | -0.25 | 0.09  | -0.12 | 0.009 | 11500 | 13400 | 11300 | 15400 | 11500 | 12800 | 11500 | 12500 | 653.7 | 1958.2 | 3 | 0.0153 | 7.789 |

|                                                            |                                                                                                                                                                                                                    |                |     |      |          |     |       |       |      |        |       |       |       |      |      |      |      |      |      |      |      |       |        |   |        |       |
|------------------------------------------------------------|--------------------------------------------------------------------------------------------------------------------------------------------------------------------------------------------------------------------|----------------|-----|------|----------|-----|-------|-------|------|--------|-------|-------|-------|------|------|------|------|------|------|------|------|-------|--------|---|--------|-------|
| 40S ribosomal protein S20 OS=Sus scrofa GN=RPS20 PE=3 SV=1 | U9 RS20_PIG,sp P60866 RS20_HUMAN,sp P60867 RS20_MOUSE,sp P60868 RS20_RAT,sp Q3ZBH8 RS20_BOVIN,sp Q4R5D0 RS20_MACFA,sp Q5R924 RS20_PONAB,tr B4DW28 B4DW28_HUMAN,tr D2H950 D2H950_AILME,tr D3ZZK1 D3ZZK1_RAT,tr E2RB | IIDLH SPSE IVk | 95% | 49.7 | 51.55931 | Ref | 0.088 | -0.08 | 0.34 | 0.044  | 0.13  | -0.12 | 0.068 | 2270 | 2090 | 2020 | 3030 | 2720 | 2530 | 2210 | 2500 | 980.1 | 1958.2 | 2 | 0.0121 | 6.158 |
| 40S ribosomal protein S20 OS=Sus scrofa GN=RPS20 PE=3 SV=1 | U9 RS20_PIG,sp P60866 RS20_HUMAN,sp P60867 RS20_MOUSE,sp P60868 RS20_RAT,sp Q3ZBH8 RS20_BOVIN,sp Q4R5D0 RS20_MACFA,sp Q5R924 RS20_PONAB,tr B4DW28 B4DW28_HUMAN,tr D2H950 D2H950_AILME,tr D3ZZK1 D3ZZK1_RAT,tr E2RB | IIDLH SPSE IVk | 63% | 34.2 | 52.53578 | Ref | 0.31  | -0.14 | 0.17 | -0.024 | 0.083 | 0.048 | 0.16  | 3290 | 3880 | 3090 | 4300 | 4150 | 3900 | 3970 | 4270 | 653.7 | 1958.2 | 3 | 0.0141 | 7.222 |

|                                                            |                                                                                                                                                                                                                    |                            |     |      |          |     |       |       |       |        |       |      |       |       |       |       |       |       |       |       |       |       |        |   |        |       |
|------------------------------------------------------------|--------------------------------------------------------------------------------------------------------------------------------------------------------------------------------------------------------------------|----------------------------|-----|------|----------|-----|-------|-------|-------|--------|-------|------|-------|-------|-------|-------|-------|-------|-------|-------|-------|-------|--------|---|--------|-------|
| 40S ribosomal protein S20 OS=Sus scrofa GN=RPS20 PE=3 SV=1 | U9 RS20_PIG,sp P60866 RS20_HUMAN,sp P60867 RS20_MOUSE,sp P60868 RS20_RAT,sp Q3ZBH8 RS20_BOVIN,sp Q4R5D0 RS20_MACFA,sp Q5R924 RS20_PONAB,tr B4DW28 B4DW28_HUMAN,tr D2H950 D2H950_AILME,tr D3ZZK1 D3ZZK1_RAT,tr E2RB | tPVE<br>PEVA<br>IHR        | 95% | 51.7 | 52.22743 | Ref | 0.28  | 0.061 | 0.2   | -0.099 | 0.004 | 0.19 | -0.17 | 29100 | 30700 | 28600 | 35300 | 31700 | 29700 | 35400 | 27200 | 518   | 1550.9 | 3 | 0.0112 | 7.226 |
| Histone H2A.Z OS=Bos taurus GN=H2AFZ PE=1 SV=2             | 4 H2AZ_BOVIN,sp P0C0S5 H2AZ_HUMAN,sp P0C0S6 H2AZ_MOUSE,sp P0C0S7 H2AZ_RAT,sp Q32LA7 H2AV_BOVIN,sp Q3THW5 H2AV_MOUSE,sp Q5RC42 H2AZ_PONAB,sp Q6YNC8 H2AZ_SHEEP,sp Q71UI9 H2AV_HUMAN,tr B1PEY3 B1PEY3_PIG,tr B2RVP5  | tTIA<br>GGG<br>VIPH<br>IHK | 95% | 54.5 | 50.89655 | Ref | -0.28 | 0.23  | -0.45 | 0.15   | 0.16  | 0.11 | 0.22  | 21700 | 15900 | 24500 | 17300 | 28800 | 25300 | 25500 | 27300 | 660.4 | 1978.2 | 3 | 0.0164 | 8.29  |

|                                                         |                                                                                                                                                                                                                                                                                                                           |                            |     |      |          |     |       |       |       |       |       |       |       |       |       |       |       |       |       |       |       |       |        |   |        |       |
|---------------------------------------------------------|---------------------------------------------------------------------------------------------------------------------------------------------------------------------------------------------------------------------------------------------------------------------------------------------------------------------------|----------------------------|-----|------|----------|-----|-------|-------|-------|-------|-------|-------|-------|-------|-------|-------|-------|-------|-------|-------|-------|-------|--------|---|--------|-------|
| Histone H2A.Z<br>OS=Bos taurus<br>GN=H2AFZ PE=1<br>SV=2 | 4 H2AZ_B<br>OVIN,sp <br>P0C0S5 H<br>2AZ_HUM<br>AN,sp P0<br>C0S6 H2A<br>Z_MOUSE<br>,sp P0C0S<br>7 H2AZ_R<br>AT,sp Q3<br>2LA7 H2A<br>V_BOVIN,<br>sp Q3TH<br>W5 H2AV<br>_MOUSE,<br>sp Q5RC4<br>2 H2AZ_P<br>ONAB,sp <br>Q6YNC8 <br>H2AZ_SH<br>EEP,sp Q<br>71UI9 H2<br>AV_HUM<br>AN,tr B1P<br>EY3 B1PE<br>Y3_PIG,tr<br> B2RVP5 | aTIA<br>GGG<br>VIPH<br>IHK | 62% | 30.5 | 50.89531 | Ref | -0.35 | 0.43  | -0.87 | 0.22  | 0.11  | 0.11  | 0.22  | 34500 | 23600 | 43800 | 19900 | 46800 | 37800 | 39500 | 42400 | 495.6 | 1978.2 | 4 | 0.0162 | 8.197 |
| Histone H2A.Z<br>OS=Bos taurus<br>GN=H2AFZ PE=1<br>SV=2 | 4 H2AZ_B<br>OVIN,sp <br>P0C0S5 H<br>2AZ_HUM<br>AN,sp P0<br>C0S6 H2A<br>Z_MOUSE<br>,sp P0C0S<br>7 H2AZ_R<br>AT,sp Q3<br>2LA7 H2A<br>V_BOVIN,<br>sp Q3TH<br>W5 H2AV<br>_MOUSE,<br>sp Q5RC4<br>2 H2AZ_P<br>ONAB,sp <br>Q6YNC8 <br>H2AZ_SH<br>EEP,sp Q<br>71UI9 H2<br>AV_HUM<br>AN,tr B1P<br>EY3 B1PE<br>Y3_PIG,tr<br> B2RVP5 | aTIA<br>GGG<br>VIPH<br>IHK | 66% | 30.9 | 50.48624 | Ref | 0.077 | 0.018 | -0.03 | 0.004 | 0.081 | 0.059 | 0.065 | 8370  | 7950  | 8290  | 9010  | 10200 | 9350  | 9620  | 9580  | 495.6 | 1978.2 | 4 | 0.0082 | 4.135 |

|                                                         |                                                                                                                                                                                                                                                                                                                           |                                                                                                                                                                                                                                                                                                                           |             |      |         |          |       |       |       |      |       |       |       |       |       |       |       |       |        |       |       |        |        |        |        |        |
|---------------------------------------------------------|---------------------------------------------------------------------------------------------------------------------------------------------------------------------------------------------------------------------------------------------------------------------------------------------------------------------------|---------------------------------------------------------------------------------------------------------------------------------------------------------------------------------------------------------------------------------------------------------------------------------------------------------------------------|-------------|------|---------|----------|-------|-------|-------|------|-------|-------|-------|-------|-------|-------|-------|-------|--------|-------|-------|--------|--------|--------|--------|--------|
| Histone H2A.Z<br>OS=Bos taurus<br>GN=H2AFZ PE=1<br>SV=2 | 4 H2AZ_B<br>OVIN,sp <br>P0C0S5 H<br>2AZ_HUM<br>AN,sp P0<br>C0S6 H2A<br>Z_MOUSE<br>,sp P0C0S<br>7 H2AZ_R<br>AT,sp Q3<br>2LA7 H2A<br>V_BOVIN,<br>sp Q3TH<br>W5 H2AV<br>_MOUSE,<br>sp Q5RC4<br>2 H2AZ_P<br>ONAB,sp <br>Q6YNC8 <br>H2AZ_SH<br>EEP,sp Q<br>71UI9 H2<br>AV_HUM<br>AN,tr B1P<br>EY3 B1PE<br>Y3_PIG,tr<br> B2RVP5 | gDEE<br>LDL                                                                                                                                                                                                                                                                                                               | 95%         | 61.4 | 53.3649 | Ref      | -0.18 | 0.44  | -0.85 | 0.32 | 0.085 | -0.06 | -0.06 | 35000 | 23400 | 39100 | 17900 | 44600 | 33000  | 31100 | 31000 | 864    | 1725.9 | 2      | 0.0163 | 9.453  |
|                                                         | Histone H2A.Z<br>OS=Bos taurus<br>GN=H2AFZ PE=1<br>SV=2                                                                                                                                                                                                                                                                   | 4 H2AZ_B<br>OVIN,sp <br>P0C0S5 H<br>2AZ_HUM<br>AN,sp P0<br>C0S6 H2A<br>Z_MOUSE<br>,sp P0C0S<br>7 H2AZ_R<br>AT,sp Q3<br>2LA7 H2A<br>V_BOVIN,<br>sp Q3TH<br>W5 H2AV<br>_MOUSE,<br>sp Q5RC4<br>2 H2AZ_P<br>ONAB,sp <br>Q6YNC8 <br>H2AZ_SH<br>EEP,sp Q<br>71UI9 H2<br>AV_HUM<br>AN,tr B1P<br>EY3 B1PE<br>Y3_PIG,tr<br> B2RVP5 | gDEE<br>LDL | 89%  | 44.5    | 53.31036 | Ref   | -0.53 | 0.33  | -1.1 | 0.35  | 0.12  | 0.1   | 0.24  | 94300 | 50800 | 99900 | 42100 | 125000 | 93300 | 96000 | 105000 | 576.3  | 1725.9 | 3      | 0.0152 |



|                                              |                                |                             |     |      |          |     |        |       |       |       |       |       |       |       |       |       |       |       |       |       |       |       |        |   |        |       |
|----------------------------------------------|--------------------------------|-----------------------------|-----|------|----------|-----|--------|-------|-------|-------|-------|-------|-------|-------|-------|-------|-------|-------|-------|-------|-------|-------|--------|---|--------|-------|
| Basigin OS=Bos<br>taurus GN=BSG<br>PE=2 SV=1 | tr Q3ZBX<br>0 Q3ZBX0<br>_BOVIN | sGQ<br>YScIF<br>LPEH<br>AGR | 95% | 60.6 | 51.3492  | Ref | -0.074 | -0.01 | -0.23 | 0.18  | -0.06 | 0.061 | 0.64  | 1020  | 997   | 1130  | 1090  | 1600  | 1180  | 1340  | 1980  | 672.3 | 2014   | 3 | 0.0124 | 6.147 |
| Basigin OS=Bos<br>taurus GN=BSG<br>PE=2 SV=1 | tr Q3ZBX<br>0 Q3ZBX0<br>_BOVIN | sGQ<br>YScIF<br>LPEH<br>AGR | 95% | 61.9 | 51.42083 | Ref | 0.33   | 0.047 | 0.008 | 0.047 | -0.19 | -0    | 0.24  | 2020  | 2320  | 2070  | 2260  | 2560  | 1890  | 2260  | 2650  | 672.3 | 2014   | 3 | 0.0109 | 5.417 |
| Basigin OS=Bos<br>taurus GN=BSG<br>PE=2 SV=1 | tr Q3ZBX<br>0 Q3ZBX0<br>_BOVIN | sGQ<br>YScIF<br>LPEH<br>AGR | 95% | 56.2 | 51.56737 | Ref | 0.2    | -0.08 | -0.02 | 0.067 | -0.12 | 0.14  | 0.23  | 1260  | 1260  | 1130  | 1320  | 1540  | 1190  | 1480  | 1560  | 672.3 | 2014   | 3 | 0.0069 | 3.422 |
| Basigin OS=Bos<br>taurus GN=BSG<br>PE=2 SV=1 | tr Q3ZBX<br>0 Q3ZBX0<br>_BOVIN | sGQ<br>YScIF<br>LPEH<br>AGR | 55% | 31.6 | 51.47045 | Ref | 0.17   | -0    | 0.032 | 0.17  | 0.29  | -0.17 | -0.18 | 1080  | 995   | 960   | 1100  | 1340  | 1270  | 964   | 950   | 672.3 | 2014   | 3 | 0.0098 | 4.866 |
| Basigin OS=Bos<br>taurus GN=BSG<br>PE=2 SV=1 | tr Q3ZBX<br>0 Q3ZBX0<br>_BOVIN | tEYE<br>VDSE<br>DR          | 95% | 52.5 | 47.17928 | Ref | -0.055 | 0.18  | -0.1  | -0.03 | -0.06 | 0.26  | 0.082 | 20300 | 15400 | 19700 | 18200 | 21000 | 18000 | 23400 | 20600 | 773.9 | 1545.7 | 2 | 0.0111 | 7.169 |



|                                                                             |                                                                                                                                                                                                                                               |                  |     |      |          |     |       |       |       |       |       |       |       |     |     |     |     |     |     |     |     |       |      |   |        |       |
|-----------------------------------------------------------------------------|-----------------------------------------------------------------------------------------------------------------------------------------------------------------------------------------------------------------------------------------------|------------------|-----|------|----------|-----|-------|-------|-------|-------|-------|-------|-------|-----|-----|-----|-----|-----|-----|-----|-----|-------|------|---|--------|-------|
| Chloride intracellular channel protein 1 OS=Homo sapiens GN=CLIC1 PE=1 SV=4 | 9 CLIC1_HUMAN,sp Q5E9B7 CLIC1_BOVIN,sp Q6MG61 CLIC1_RAT,sp Q95MF9 CLIC1_RABIT,sp Q9Z1Q5 CLIC1_MOUSE,trans D2I497 D2I497_AILME,trans F1PBH0 F1PBH0_CANFA,trans F1PKI4 F1PKI4_CANFA,trans F1PTB9 F1PTB9_CANFA,trans F1Q097 F1Q097_CANFA,trans F | IFmV<br>LWL<br>k | 72% | 34   | 50.38171 | Ref | -0.18 | -0.45 | -0.19 | -0.12 | -0.06 | -0.28 | -0.24 | 412 | 305 | 274 | 370 | 426 | 388 | 348 | 357 | 558.7 | 1673 | 3 | 0.0038 | 2.258 |
|                                                                             | 9 CLIC1_HUMAN,sp Q5E9B7 CLIC1_BOVIN,sp Q6MG61 CLIC1_RAT,sp Q95MF9 CLIC1_RABIT,sp Q9Z1Q5 CLIC1_MOUSE,trans D2I497 D2I497_AILME,trans F1PBH0 F1PBH0_CANFA,trans F1PKI4 F1PKI4_CANFA,trans F1PTB9 F1PTB9_CANFA,trans F1Q097 F1Q097_CANFA,trans F | IFmV<br>LWL<br>k | 69% | 33.4 | 50.40638 | Ref | 0.24  | -0.3  | -0.29 | -0.17 | -0.45 | -0.31 | -0.49 | 502 | 461 | 345 | 391 | 466 | 336 | 386 | 339 | 558.7 | 1673 | 3 | 0.0014 | 0.824 |



|                                                                            |                                                                                                                                                                                                                    |                            |     |      |          |     |      |       |      |        |       |       |       |       |       |       |       |       |       |       |       |       |        |   |        |       |
|----------------------------------------------------------------------------|--------------------------------------------------------------------------------------------------------------------------------------------------------------------------------------------------------------------|----------------------------|-----|------|----------|-----|------|-------|------|--------|-------|-------|-------|-------|-------|-------|-------|-------|-------|-------|-------|-------|--------|---|--------|-------|
| 40S ribosomal protein S3a<br>OS=Rattus norvegicus<br>GN=Rps3a PE=1<br>SV=2 | 2 RS3A_RAT,sp P61246 RS3A_FELCA,sp P61247 RS3A_HUMAN,sp P97351 RS3A_MOUSE,sp Q4R4Z6 RS3A_MACFA,sp Q56JV9 RS3A_BOVIN,tr A8K4W0 A8K4W0_HUMAN,tr D2GXR5 D2GXR5_AILME,tr D3Z6C3 D3Z6C3_MOUSE,tr D3Z7W7 D3Z7W7_MOUSE,tr | acQS<br>IYPL<br>HDV<br>FVR | 65% | 35.3 | 53.33173 | Ref | 0.13 | -0.27 | 0.21 | -0.055 | -0.1  | 0.37  | 0.01  | 746   | 819   | 673   | 1050  | 969   | 820   | 1180  | 917   | 666.7 | 1997   | 3 | 0.0035 | 1.731 |
| 40S ribosomal protein S3a<br>OS=Rattus norvegicus<br>GN=Rps3a PE=1<br>SV=2 | 2 RS3A_RAT,sp P61246 RS3A_FELCA,sp P61247 RS3A_HUMAN,sp P97351 RS3A_MOUSE,sp Q4R4Z6 RS3A_MACFA,sp Q56JV9 RS3A_BOVIN,tr A8K4W0 A8K4W0_HUMAN,tr D2GXR5 D2GXR5_AILME,tr D3Z6C3 D3Z6C3_MOUSE,tr D3Z7W7 D3Z7W7_MOUSE,tr | eVQ<br>TNDL<br>k           | 84% | 39   | 52.31477 | Ref | 0.3  | -0.03 | 0.29 | -0.26  | 0.081 | -0.24 | -0.29 | 17800 | 16700 | 14300 | 20100 | 15100 | 16800 | 14100 | 13500 | 777.9 | 1553.9 | 2 | 0.0046 | 2.968 |

|                                                                            |                                                                                                                                                                                                              |     |      |          |     |      |       |       |        |       |       |       |       |       |       |       |       |       |       |       |       |        |   |        |       |
|----------------------------------------------------------------------------|--------------------------------------------------------------------------------------------------------------------------------------------------------------------------------------------------------------|-----|------|----------|-----|------|-------|-------|--------|-------|-------|-------|-------|-------|-------|-------|-------|-------|-------|-------|-------|--------|---|--------|-------|
| 40S ribosomal protein S3a<br>OS=Rattus norvegicus<br>GN=Rps3a PE=1<br>SV=2 | 2 RS3A_R<br>AT,sp P61246 RS3A_FELCA,sp P61247 RS3A_HUMAN,sp P97351 RS3A_MOUSE,sp Q4R4Z6 RS3A_MACFA,sp Q56JV9 RS3A_BOVIN,tr A8K4W0 A8K4W0_HUMAN,tr D2GXR5 D2GXR5_AILME,tr D3Z6C3 D3Z6C3_MOUSE,tr kTSY AQH QQV | 75% | 36.3 | 53.60137 | Ref | 0.17 | -0.06 | -0.03 | -0.076 | 0.21  | -0.12 | 0.12  | 8290  | 8540  | 7890  | 9030  | 9660  | 10300 | 8530  | 10000 | 489.3 | 1953.1 | 4 | 0.0127 | 6.489 |
| 40S ribosomal protein S3a<br>OS=Rattus norvegicus<br>GN=Rps3a PE=1<br>SV=2 | 2 RS3A_R<br>AT,sp P61246 RS3A_FELCA,sp P61247 RS3A_HUMAN,sp P97351 RS3A_MOUSE,sp Q4R4Z6 RS3A_MACFA,sp Q56JV9 RS3A_BOVIN,tr A8K4W0 A8K4W0_HUMAN,tr D2GXR5 D2GXR5_AILME,tr D3Z6C3 D3Z6C3_MOUSE,tr IIPDS IGK    | 55% | 28.8 | 48.56088 | Ref | 0.38 | -0.17 | 0.21  | -0.16  | -0.05 | -0.21 | -0.17 | 44900 | 43100 | 32000 | 46600 | 39800 | 37500 | 35000 | 35800 | 484.3 | 1449.9 | 3 | 0.0035 | 2.395 |

|                                                                                               |                                                                                                                                                                                    |                            |     |      |          |     |        |       |       |       |      |       |      |       |       |       |       |       |       |       |       |     |        |   |        |       |
|-----------------------------------------------------------------------------------------------|------------------------------------------------------------------------------------------------------------------------------------------------------------------------------------|----------------------------|-----|------|----------|-----|--------|-------|-------|-------|------|-------|------|-------|-------|-------|-------|-------|-------|-------|-------|-----|--------|---|--------|-------|
| Cation-dependent<br>mannose-6-<br>phosphate receptor<br>OS=Bos taurus<br>GN=M6PR PE=1<br>SV=1 | sp P11456 MPRD_BOVIN,sp P20645 MPRD_HUMAN,tr E2QTJ1 E2QTJ1_CA_NFA,tr F1SLX0 F1SLX0_PIG,tr F7DKQ6 F7DKQ6_MACMU,tr F7I5Z9 F7I5Z9_CALJA,tr Q53GY9 Q53GY9_HUMAN,tr Q6I9U3 Q6I9U3_HUMAN | hTLA<br>DNF<br>NPV<br>SEER | 87% | 42.1 | 52.23833 | Ref | -0.068 | -0.59 | 0.036 | -0.52 | 0.32 | -0.49 | 0.41 | 5310  | 5190  | 3920  | 6790  | 5080  | 7950  | 4740  | 8770  | 645 | 1931.9 | 3 | 0.0146 | 7.571 |
|                                                                                               | sp P11456 MPRD_BOVIN,sp P20645 MPRD_HUMAN,tr E2QTJ1 E2QTJ1_CA_NFA,tr F1SLX0 F1SLX0_PIG,tr F7DKQ6 F7DKQ6_MACMU,tr F7I5Z9 F7I5Z9_CALJA,tr Q53GY9 Q53GY9_HUMAN,tr Q6I9U3 Q6I9U3_HUMAN | hTLA<br>DNF<br>NPV<br>SEER | 95% | 73.8 | 52.23833 | Ref | -0.11  | -0.47 | 0.11  | -0.18 | 0.31 | -0.47 | -0.2 | 16300 | 12700 | 10700 | 17900 | 16200 | 19900 | 12100 | 14400 | 645 | 1931.9 | 3 | 0.0146 | 7.571 |

|                                                                                               |                                                                                                                                                                                          |                            |     |      |          |     |       |       |       |       |       |       |       |      |      |      |      |      |      |      |      |     |      |   |        |       |
|-----------------------------------------------------------------------------------------------|------------------------------------------------------------------------------------------------------------------------------------------------------------------------------------------|----------------------------|-----|------|----------|-----|-------|-------|-------|-------|-------|-------|-------|------|------|------|------|------|------|------|------|-----|------|---|--------|-------|
| Cation-dependent<br>mannose-6-<br>phosphate receptor<br>OS=Bos taurus<br>GN=M6PR PE=1<br>SV=1 | sp P11456 MPRD_BOVIN,sp P20645 MPRD_HUMAN,tri E2QTJ1 E2QTJ1_CA_NFA,tri F1SLX0 F1SLX0_PIG,tri F7DKQ6 F7DKQ6_MACMU,tri F7I5Z9 F7I5Z9_CALJA,tri Q53GY9 Q53GY9_HUMAN,tri Q6I9U3 Q6I9U3_HUMAN | hTLA<br>DNF<br>NPV<br>SEER | 90% | 42.2 | 52.26112 | Ref | -0.57 | -0.42 | 0.25  | -0.21 | 0.21  | -0.86 | 0.38  | 3000 | 1750 | 2110 | 3780 | 3020 | 3530 | 1760 | 4110 | 967 | 1932 | 2 | 0.0129 | 6.684 |
| Cation-dependent<br>mannose-6-<br>phosphate receptor<br>OS=Bos taurus<br>GN=M6PR PE=1<br>SV=1 | sp P11456 MPRD_BOVIN,sp P20645 MPRD_HUMAN,tri E2QTJ1 E2QTJ1_CA_NFA,tri F1SLX0 F1SLX0_PIG,tri F7DKQ6 F7DKQ6_MACMU,tri F7I5Z9 F7I5Z9_CALJA,tri Q53GY9 Q53GY9_HUMAN,tri Q6I9U3 Q6I9U3_HUMAN | hTLA<br>DNF<br>NPV<br>SEER | 95% | 59.5 | 52.22891 | Ref | 0.017 | -0.11 | -0.18 | -0.2  | -0.07 | -0.05 | 0.059 | 6070 | 6490 | 6440 | 6900 | 7510 | 7160 | 7610 | 8120 | 645 | 1932 | 3 | 0.0135 | 6.997 |



|                                                                                                                          |                                                                                                                                                                                                                               |                      |            |             |                 |            |              |              |              |               |             |              |             |              |              |              |              |              |              |              |              |              |               |          |               |              |
|--------------------------------------------------------------------------------------------------------------------------|-------------------------------------------------------------------------------------------------------------------------------------------------------------------------------------------------------------------------------|----------------------|------------|-------------|-----------------|------------|--------------|--------------|--------------|---------------|-------------|--------------|-------------|--------------|--------------|--------------|--------------|--------------|--------------|--------------|--------------|--------------|---------------|----------|---------------|--------------|
| <p>Cation-dependent<br/>mannose-6-<br/>phosphate receptor<br/>OS=Bos taurus<br/>GN=M6PR PE=1<br/>SV=1</p>                | <p>sp P11456 MPRD_BOVIN,sp P20645 MPRD_HUMAN,tr E2QTJ1 E2QTJ1_CA_NFA,tr F1SLX0 F1SLX0_PIG,tr F7DKQ6 F7DKQ6_MACMU, tr F715Z9 F715Z9_CALJA,tr Q53GY9 Q53GY9_HUMAN,tr Q6I9U3 Q6I9U3_HUMAN</p>                                    | <p>tcDL<br/>VGEK</p> | <p>90%</p> | <p>41.9</p> | <p>51.89563</p> | <p>Ref</p> | <p>-0.12</p> | <p>-0.56</p> | <p>0.12</p>  | <p>-0.25</p>  | <p>0.27</p> | <p>-0.66</p> | <p>0.12</p> | <p>43700</p> | <p>34100</p> | <p>27200</p> | <p>49200</p> | <p>41700</p> | <p>52500</p> | <p>28700</p> | <p>49100</p> | <p>759.9</p> | <p>1517.8</p> | <p>2</p> | <p>0.0118</p> | <p>7.774</p> |
| <p>Membrane-associated<br/>progesterone<br/>receptor<br/>component 1<br/>OS=Homo sapiens<br/>GN=PGRMC1 PE=1<br/>SV=3</p> | <p>4 PGRC1_HUMAN,sp O55022 PGRC1_MOUSE,sp Q17QC0 PGRC1_BOVIN,sp Q5RED0 PGRC1_PONAB,sp Q95250 PGRC1_PIG,tr D2H3C2 D2H3C2_AILME, tr E2RJW8 E2RJW8_CANFA, tr F6WPT4 F6WPT4_HORSE, tr F7BA07 F7BA07_MACMU, tr Q3TFP8 Q3TFP8_R</p> | <p>fDGV<br/>QDP</p>  | <p>95%</p> | <p>45.4</p> | <p>50.26917</p> | <p>Ref</p> | <p>0.039</p> | <p>0.2</p>   | <p>0.035</p> | <p>-0.074</p> | <p>0.13</p> | <p>-0.19</p> | <p>0.1</p>  | <p>27200</p> | <p>21700</p> | <p>26300</p> | <p>26300</p> | <p>26900</p> | <p>27000</p> | <p>22600</p> | <p>27500</p> | <p>619.3</p> | <p>1236.6</p> | <p>2</p> | <p>0.0099</p> | <p>7.974</p> |

|                                                                                                    |                                                                                                                                                                                                                   |              |     |      |          |     |        |       |      |       |       |       |       |      |      |      |      |      |      |      |      |       |        |   |        |       |
|----------------------------------------------------------------------------------------------------|-------------------------------------------------------------------------------------------------------------------------------------------------------------------------------------------------------------------|--------------|-----|------|----------|-----|--------|-------|------|-------|-------|-------|-------|------|------|------|------|------|------|------|------|-------|--------|---|--------|-------|
| Membrane-associated progesterone receptor component 1<br>OS=Homo sapiens<br>GN=PGRMC1 PE=1<br>SV=3 | 4 PGRC1_HUMAN,sp O55022 PGRC1_MOUSE,sp Q17QC0 PGRC1_BOVIN,sp Q5REDO PGRC1_PONAB,sp Q95250 PGRC1_PIG,tr D2H3C2 D2H3C2_AILME,tr E2RJW8 E2RJW8_CANFA,tr F6WPT4 F6WPT4_HORSE,tr F7BA07 F7BA07_MACMU,tr Q3TFP8 Q3TFP8_ | iLMA<br>InGk | 56% | 31.7 | 51.37167 | Ref | -0.32  | 0.04  | 0.2  | 0.16  | 0.34  | -0.09 | 0.014 | 6980 | 4810 | 6730 | 8420 | 9060 | 8940 | 6930 | 7390 | 490.3 | 1467.9 | 3 | 0.0219 | 14.88 |
| Membrane-associated progesterone receptor component 1<br>OS=Homo sapiens<br>GN=PGRMC1 PE=1<br>SV=3 | 4 PGRC1_HUMAN,sp O55022 PGRC1_MOUSE,sp Q17QC0 PGRC1_BOVIN,sp Q5REDO PGRC1_PONAB,sp Q95250 PGRC1_PIG,tr D2H3C2 D2H3C2_AILME,tr E2RJW8 E2RJW8_CANFA,tr F6WPT4 F6WPT4_HORSE,tr F7BA07 F7BA07_MACMU,tr Q3TFP8 Q3TFP8_ | iLMA<br>InGk | 62% | 32.7 | 51.26453 | Ref | -0.008 | 0.091 | 0.12 | 0.009 | 0.088 | 0.16  | 0.029 | 2110 | 1900 | 2200 | 2520 | 2570 | 2370 | 2610 | 2360 | 490.3 | 1467.9 | 3 | 0.0183 | 12.45 |

|                                                                                                    |                                                                                                                                                                                                                   |                   |     |      |          |     |       |       |       |        |      |       |      |       |       |       |       |       |       |       |       |       |        |   |        |       |
|----------------------------------------------------------------------------------------------------|-------------------------------------------------------------------------------------------------------------------------------------------------------------------------------------------------------------------|-------------------|-----|------|----------|-----|-------|-------|-------|--------|------|-------|------|-------|-------|-------|-------|-------|-------|-------|-------|-------|--------|---|--------|-------|
| Membrane-associated progesterone receptor component 1<br>OS=Homo sapiens<br>GN=PGRMC1 PE=1<br>SV=3 | 4 PGRC1_HUMAN,sp O55022 PGRC1_MOUSE,sp Q17QC0 PGRC1_BOVIN,sp Q5REDO PGRC1_PONAB,sp Q95250 PGRC1_PIG,tr D2H3C2 D2H3C2_AILME,tr E2RJW8 E2RJW8_CANFA,tr F6WPT4 F6WPT4_HORSE,tr F7BA07 F7BA07_MACMU,tr Q3TFP8 Q3TFP8_ | iLMA<br>InGk      | 55% | 31   | 51.07461 | Ref | -0.18 | 0.034 | 0.079 | 0.043  | 0.35 | -0.09 | 0.15 | 14200 | 10900 | 13700 | 15900 | 17100 | 18400 | 14200 | 16700 | 734.9 | 1467.9 | 2 | 0.0122 | 8.289 |
| Membrane-associated progesterone receptor component 1<br>OS=Homo sapiens<br>GN=PGRMC1 PE=1<br>SV=3 | 4 PGRC1_HUMAN,sp O55022 PGRC1_MOUSE,sp Q17QC0 PGRC1_BOVIN,sp Q5REDO PGRC1_PONAB,sp Q95250 PGRC1_PIG,tr D2H3C2 D2H3C2_AILME,tr E2RJW8 E2RJW8_CANFA,tr F6WPT4 F6WPT4_HORSE,tr F7BA07 F7BA07_MACMU,tr Q3TFP8 Q3TFP8_ | rDFT<br>PAEL<br>R | 68% | 34.9 | 52.0499  | Ref | 0.013 | 0.2   | 0.18  | -0.093 | 0.15 | -0.1  | 0.23 | 4700  | 4770  | 5900  | 6520  | 5950  | 6150  | 5390  | 6740  | 470.3 | 1407.8 | 3 | 0.0132 | 9.405 |

|                                                            |                                                                                                                                                                                                                                                                                                                          |              |     |      |          |     |      |       |      |       |      |       |      |      |       |      |       |       |       |      |       |       |        |   |        |       |
|------------------------------------------------------------|--------------------------------------------------------------------------------------------------------------------------------------------------------------------------------------------------------------------------------------------------------------------------------------------------------------------------|--------------|-----|------|----------|-----|------|-------|------|-------|------|-------|------|------|-------|------|-------|-------|-------|------|-------|-------|--------|---|--------|-------|
| 60S ribosomal protein L10 OS=Ovis aries GN=RPL10 PE=2 SV=1 | 1 RL10_S<br>HEEP,sp <br>A9CB60 R<br>L10_PAPA<br>N,sp P27<br>635 RL10<br>_HUMAN,<br>sp P8604<br>8 RL10_<br>MOUSE,s<br>p Q29195<br> RL10_PI<br>G,sp Q2T<br>BW8 RL1<br>0L_BOVIN<br>,sp Q4R4<br>D3 RL10L<br>_MACFA,s<br>p Q4R7Y2<br> RL10_M<br>ACFA,sp <br>Q5R931 <br>RL10_PO<br>NAB,sp Q<br>6PDV7 RL<br>10_RAT,s<br>p Q6ZWW | IHPF<br>HVIR | 88% | 38.7 | 50.00382 | Ref | 0.8  | -0.1  | 0.91 | 0.027 | 1    | -0.07 | 0.18 | 7360 | 13400 | 7730 | 17500 | 10500 | 18000 | 8910 | 10600 | 331.5 | 1321.8 | 4 | 0.0068 | 5.155 |
| 60S ribosomal protein L10 OS=Ovis aries GN=RPL10 PE=2 SV=1 | 1 RL10_S<br>HEEP,sp <br>A9CB60 R<br>L10_PAPA<br>N,sp P27<br>635 RL10<br>_HUMAN,<br>sp P8604<br>8 RL10_<br>MOUSE,s<br>p Q29195<br> RL10_PI<br>G,sp Q2T<br>BW8 RL1<br>0L_BOVIN<br>,sp Q4R4<br>D3 RL10L<br>_MACFA,s<br>p Q4R7Y2<br> RL10_M<br>ACFA,sp <br>Q5R931 <br>RL10_PO<br>NAB,sp Q<br>6PDV7 RL<br>10_RAT,s<br>p Q6ZWW | IHPF<br>HVIR | 89% | 38.6 | 49.83951 | Ref | 0.77 | 0.006 | 0.92 | 0.055 | 0.95 | -0.05 | 0.1  | 4120 | 6890  | 4420 | 9350  | 5650  | 9190  | 4780 | 5280  | 331.5 | 1321.8 | 4 | 0.0031 | 2.312 |

|                                                                   |                                                                                                                                                                                                                         |                 |            |             |                 |            |             |             |             |             |             |             |             |             |             |             |             |             |             |             |             |              |               |          |               |              |
|-------------------------------------------------------------------|-------------------------------------------------------------------------------------------------------------------------------------------------------------------------------------------------------------------------|-----------------|------------|-------------|-----------------|------------|-------------|-------------|-------------|-------------|-------------|-------------|-------------|-------------|-------------|-------------|-------------|-------------|-------------|-------------|-------------|--------------|---------------|----------|---------------|--------------|
| <p>60S ribosomal protein L10 OS=Ovis aries GN=RPL10 PE=2 SV=1</p> | <p>1 RL10_SHEEP,sp A9CB60 RL10_PAPAN,sp P27635 RL10_HUMAN,sp P86048 RL10_MOUSE,sp Q29195 RL10_PIG,sp Q2TBW8 RL10L_BOVIN,sp Q4R4D3 RL10L_MACFA,sp Q4R7Y2 RL10_MACFA,sp Q5R931 RL10_PONAB,sp Q6PDV7 RL10_RAT,sp Q6ZWV</p> | <p>IHPF</p>     | <p>78%</p> | <p>35.4</p> | <p>49.83946</p> | <p>Ref</p> | <p>0.71</p> | <p>0.16</p> | <p>0.75</p> | <p>0.14</p> | <p>0.51</p> | <p>0.31</p> | <p>0.36</p> | <p>5040</p> | <p>7140</p> | <p>5320</p> | <p>8970</p> | <p>6500</p> | <p>7340</p> | <p>6650</p> | <p>6840</p> | <p>441.6</p> | <p>1321.8</p> | <p>3</p> | <p>0.0027</p> | <p>2.028</p> |
| <p>60S ribosomal protein L10 OS=Ovis aries GN=RPL10 PE=2 SV=1</p> | <p>1 RL10_SHEEP,sp A9CB60 RL10_PAPAN,sp P27635 RL10_HUMAN,sp P86048 RL10_MOUSE,sp Q29195 RL10_PIG,sp Q2TBW8 RL10L_BOVIN,sp Q4R4D3 RL10L_MACFA,sp Q4R7Y2 RL10_MACFA,sp Q5R931 RL10_PONAB,sp Q6PDV7 RL10_RAT,sp Q6ZWV</p> | <p>VHIG QVI</p> | <p>61%</p> | <p>32.4</p> | <p>51.51483</p> | <p>Ref</p> | <p>0.75</p> | <p>0.34</p> | <p>0.53</p> | <p>0.32</p> | <p>0.28</p> | <p>0.36</p> | <p>0.39</p> | <p>1150</p> | <p>1600</p> | <p>1300</p> | <p>1680</p> | <p>1600</p> | <p>1350</p> | <p>1500</p> | <p>1510</p> | <p>779</p>   | <p>1555.9</p> | <p>2</p> | <p>0.013</p>  | <p>8.38</p>  |

|                                                                           |                                                                                                                                                                                                                   |                            |      |     |      |          |     |       |       |      |       |      |       |      |      |      |      |      |      |      |      |      |       |        |   |        |       |
|---------------------------------------------------------------------------|-------------------------------------------------------------------------------------------------------------------------------------------------------------------------------------------------------------------|----------------------------|------|-----|------|----------|-----|-------|-------|------|-------|------|-------|------|------|------|------|------|------|------|------|------|-------|--------|---|--------|-------|
| 60S ribosomal protein L10 OS=Ovis aries GN=RPL10 PE=2 SV=1                | 1 RL10_SHEEP,sp A9CB60 RL10_PAPAN,sp P27635 RL10_HUMAN,sp P86048 RL10_MOUSE,sp Q29195 RL10_PIG,sp Q2TBW8 RL10L_BOVIN,sp Q4R4D3 RL10L_MACFA,sp Q4R7Y2 RL10_MACFA,sp Q5R931 RL10_PONAB,sp Q6PDV7 RL10_RAT,sp Q6ZVWV | VHIGQVI                    | MSIR | 91% | 44.5 | 51.10812 | Ref | 0.85  | 0.06  | 0.82 | 0.13  | 0.52 | 0.13  | 0.21 | 3870 | 5490 | 3450 | 6590 | 4490 | 5140 | 4080 | 4280 | 519.6 | 1555.9 | 3 | 0.0056 | 3.566 |
| Protein kinase C delta-binding protein OS=Bos taurus GN=PRKCDBP PE=2 SV=1 | sp A4FV37 PRDBP_BOVIN                                                                                                                                                                                             | kGH<br>AAP<br>TPTP<br>VkPP | R    | 78% | 35.2 | 49.67787 | Ref | -0.43 | -0.35 | 1.4  | -1.5  | 0.77 | -0.52 | 1.2  | 174  | 432  | 494  | 1840 | 275  | 1170 | 495  | 1640 | 822.8 | 2465.5 | 3 | 0.0333 | 13.51 |
| Protein kinase C delta-binding protein OS=Bos taurus GN=PRKCDBP PE=2 SV=1 | sp A4FV37 PRDBP_BOVIN                                                                                                                                                                                             | kGH<br>AAP<br>TPTP<br>VkPP | R    | 91% | 41   | 49.60827 | Ref | -0.33 | 0.027 | 1    | -0.64 | 0.49 | -0.34 | 1.1  | 1860 | 2210 | 3070 | 6900 | 2390 | 4560 | 2690 | 7400 | 617.4 | 2465.5 | 4 | 0.0311 | 12.62 |

|                                                                                 |                                              |                     |     |      |          |     |       |       |       |        |      |       |       |       |        |       |        |        |       |       |        |       |        |   |        |       |
|---------------------------------------------------------------------------------|----------------------------------------------|---------------------|-----|------|----------|-----|-------|-------|-------|--------|------|-------|-------|-------|--------|-------|--------|--------|-------|-------|--------|-------|--------|---|--------|-------|
| Protein kinase C delta-binding protein OS=Bos taurus<br>GN=PRKCDBP PE=2<br>SV=1 | sp A4FV37 PRDBP_BOVIN                        | IEAN<br>HGLL<br>VAR | 52% | 31.7 | 51.92693 | Ref | 0.3   | 0.02  | 0.57  | 0.089  | 0.52 | -0.26 | 0.48  | 42000 | 44900  | 40100 | 66100  | 52100  | 61300 | 37400 | 61900  | 499.6 | 1495.9 | 3 | 0.0106 | 7.086 |
| Protein kinase C delta-binding protein OS=Bos taurus<br>GN=PRKCDBP PE=2<br>SV=1 | sp A4FV37 PRDBP_BOVIN                        | IHVL<br>LFK         | 60% | 23.8 | 42.65384 | Ref | 0.37  | 0.1   | 0.37  | 0.024  | 0.37 | -0.18 | 0.38  | 1100  | 937    | 848   | 1150   | 993    | 1100  | 784   | 1150   | 493.3 | 1477   | 3 | 0.0019 | 1.297 |
| Protein kinase C delta-binding protein OS=Bos taurus<br>GN=PRKCDBP PE=2<br>SV=1 | sp A4FV37 PRDBP_BOVIN                        | IHVL<br>LFK         | 50% | 22.1 | 42.76646 | Ref | 0.3   | -0.08 | 0.62  | -0.017 | 0.5  | -0.1  | 0.28  | 1950  | 1730   | 1450  | 2620   | 1860   | 2320  | 1610  | 2080   | 493.3 | 1477   | 3 | 0.001  | 0.692 |
| Superoxide dismutase [Cu-Zn]<br>OS=Ovis aries<br>GN=SOD1 PE=1<br>SV=2           | sp P09670 SODC_SHEEP,tr B9VGZ6 B9VGZ6_SH_EEP | gDG<br>PVQ<br>GTIR  | 53% | 30.8 | 51.18836 | Ref | -0.23 | -0.42 | -0.22 | -0.072 | 0.22 | -0.65 | -0.22 | 2E+05 | 110000 | 1E+05 | 135000 | 164000 | 2E+05 | 1E+05 | 134000 | 652.4 | 1302.7 | 2 | 0.0119 | 9.156 |
| Superoxide dismutase [Cu-Zn]<br>OS=Ovis aries<br>GN=SOD1 PE=1<br>SV=2           | sp P09670 SODC_SHEEP,tr B9VGZ6 B9VGZ6_SH_EEP | gGN<br>EEST<br>k    | 90% | 41.8 | 51.5752  | Ref | -0.31 | -0.41 | -0.17 | -0.034 | 0.26 | -0.66 | -0.2  | 24600 | 17300  | 17400 | 23100  | 28000  | 30000 | 16600 | 22600  | 715.4 | 1428.8 | 2 | 0.0104 | 7.24  |

|                                                                                                                |                                                                                                                                                                                                                                 |             |     |      |          |     |       |       |       |        |       |       |       |       |       |       |       |       |       |      |       |       |        |   |        |       |
|----------------------------------------------------------------------------------------------------------------|---------------------------------------------------------------------------------------------------------------------------------------------------------------------------------------------------------------------------------|-------------|-----|------|----------|-----|-------|-------|-------|--------|-------|-------|-------|-------|-------|-------|-------|-------|-------|------|-------|-------|--------|---|--------|-------|
| Superoxide dismutase [Cu-Zn]<br>OS=Ovis aries<br>GN=SOD1 PE=1<br>SV=2                                          | sp P09670 SODC_SHEEP, tr B9VGZ6 B9VGZ6_SH_EEP                                                                                                                                                                                   | gGN EESTk   | 80% | 37.7 | 51.60202 | Ref | -0.28 | -0.18 | -0.02 | -0.12  | 0.13  | -0.6  | -0.27 | 12900 | 10000 | 11700 | 14600 | 15100 | 15600 | 9810 | 12200 | 477.3 | 1428.8 | 3 | 0.0096 | 6.748 |
| Superoxide dismutase [Cu-Zn]<br>OS=Ovis aries<br>GN=SOD1 PE=1<br>SV=2                                          | sp P09670 SODC_SHEEP, tr B9VGZ6 B9VGZ6_SH_EEP                                                                                                                                                                                   | gGnE ESTK   | 70% | 34   | 51.25221 | Ref | -0.19 | -0.33 | -0.24 | -0.066 | 0.17  | -0.79 | -0.26 | 17900 | 12300 | 12100 | 14500 | 18000 | 18500 | 9930 | 14200 | 715.9 | 1429.7 | 2 | 0.0108 | 7.577 |
| Superoxide dismutase [Cu-Zn]<br>OS=Ovis aries<br>GN=SOD1 PE=1<br>SV=2                                          | sp P09670 SODC_SHEEP, tr B9VGZ6 B9VGZ6_SH_EEP                                                                                                                                                                                   | hVGD LG NVk | 55% | 32.2 | 52.24396 | Ref | -0.25 | -0.3  | -0.15 | -0.18  | 0.25  | -0.5  | -0.24 | 6100  | 4690  | 4930  | 6130  | 6630  | 7780  | 4820 | 5730  | 773.9 | 1545.9 | 2 | 0.0259 | 16.72 |
| Platelet-activating factor acetylhydrolase IB subunit beta<br>OS=Rattus norvegicus<br>GN=Pafah1b2 PE=1<br>SV=1 | 4 PA1B2_RAT, sp P68401 PA1B2_BOVIN, sp P68402 PA1B2_HUMAN, sp Q5R4G2 PA1B2_PONAB, sp Q61206 PA1B2_MOUSE, tr B0KWR3 B0KWR3_CALJAT, tr B2KIG1 B2KIG1_RHIFE, tr B3RF71 B3RF71_SORAR, tr B5SNQ5 B5SNQ5_OTOGA, tr D2HC75 D2HC75_LLPR | iIVLG LLPR  | 95% | 37.9 | 35.59188 | Ref | -0.16 | -0.29 | -0.39 | -0.33  | -0.05 | -0.18 | -0.37 | 330   | 205   | 202   | 212   | 243   | 258   | 246  | 214   | 433.3 | 1296.9 | 3 | 0.0024 | 1.862 |







|                                                                      |                                                                                                                                                                                                                                                                                                                              |   |     |      |          |     |       |       |       |        |      |       |       |      |     |      |     |      |      |      |     |       |        |   |        |       |
|----------------------------------------------------------------------|------------------------------------------------------------------------------------------------------------------------------------------------------------------------------------------------------------------------------------------------------------------------------------------------------------------------------|---|-----|------|----------|-----|-------|-------|-------|--------|------|-------|-------|------|-----|------|-----|------|------|------|-----|-------|--------|---|--------|-------|
| Barrier-to-autointegration factor OS=Mus musculus GN=Banf1 PE=1 SV=1 | 2 BAF_M<br>OUSE,sp <br>O75531 B<br>AF_HUM<br>AN,sp P6<br>1283 BAF<br>_BOVIN,s<br>p Q5RBU<br>9 BAF_P<br>ONAB,sp <br>Q9R1T1 B<br>AF_RAT,tr<br> B2R4V4 <br>B2R4V4_<br>HUMAN,t<br>r D2H4N2<br> D2H4N2<br>_AILME,tr<br> E2RGE0 <br>E2RGE0_C<br>ANFA,tr F<br>1RU33 F1<br>RU33_PIG<br>,tr F6QR2<br>3 F6QR23<br>_MONDO,<br>tr F6T830 | k | 95% | 51.6 | 48.58182 | Ref | -0.37 | 0.021 | -0.23 | -0.13  | 0.14 | -0.01 | -0.46 | 1110 | 703 | 1000 | 946 | 1120 | 1180 | 1110 | 806 | 653.4 | 1957.2 | 3 | 0.013  | 6.637 |
| Barrier-to-autointegration factor OS=Mus musculus GN=Banf1 PE=1 SV=1 | 2 BAF_M<br>OUSE,sp <br>O75531 B<br>AF_HUM<br>AN,sp P6<br>1283 BAF<br>_BOVIN,s<br>p Q5RBU<br>9 BAF_P<br>ONAB,sp <br>Q9R1T1 B<br>AF_RAT,tr<br> B2R4V4 <br>B2R4V4_<br>HUMAN,t<br>r D2H4N2<br> D2H4N2<br>_AILME,tr<br> E2RGE0 <br>E2RGE0_C<br>ANFA,tr F<br>1RU33 F1<br>RU33_PIG<br>,tr F6QR2<br>3 F6QR23<br>_MONDO,<br>tr F6T830 | k | 95% | 55.2 | 47.87383 | Ref | -0.37 | -0.14 | -0.05 | -0.091 | 0.08 | -0.23 | -0.04 | 581  | 403 | 513  | 613 | 656  | 645  | 542  | 616 | 653.4 | 1957.2 | 3 | 0.0042 | 2.148 |

|                                                                      |                                                                                                                                                                                                                                                                      |    |     |      |          |     |       |       |       |       |                           |       |      |     |     |     |     |     |                           |     |     |       |        |   |        |       |
|----------------------------------------------------------------------|----------------------------------------------------------------------------------------------------------------------------------------------------------------------------------------------------------------------------------------------------------------------|----|-----|------|----------|-----|-------|-------|-------|-------|---------------------------|-------|------|-----|-----|-----|-----|-----|---------------------------|-----|-----|-------|--------|---|--------|-------|
| Barrier-to-autointegration factor OS=Mus musculus GN=Banf1 PE=1 SV=1 | 2 BAF_MOUSE,sp O75531 BAF_HUMAN,sp P61283 BAF_BOVIN,sp Q5RBU9 BAF_PONAB,sp Q9R1T1 BAF_RAT,transcript B2R4V4 B2R4V4_HUMAN,transcript D2H4N2 D2H4N2_AILME,transcript E2RGE0 E2RGE0_CANFA,transcript F1RU33 F1RU33_PIG,transcript F6QR23 F6QR23_MONDO,transcript F6T830 | k  | 94% | 46.2 | 49.15294 | Ref | 0.043 | 0.02  | -0.13 | -0.41 | -0.06                     | -0.26 | -0.1 | 323 | 289 | 309 | 313 | 284 | 315                       | 288 | 319 | 653.4 | 1957.2 | 3 | 0.0216 | 11.03 |
| Barrier-to-autointegration factor OS=Mus musculus GN=Banf1 PE=1 SV=1 | 2 BAF_MOUSE,sp O75531 BAF_HUMAN,sp P61283 BAF_BOVIN,sp Q5RBU9 BAF_PONAB,sp Q9R1T1 BAF_RAT,transcript B2R4V4 B2R4V4_HUMAN,transcript D2H4N2 D2H4N2_AILME,transcript E2RGE0 E2RGE0_CANFA,transcript F1RU33 F1RU33_PIG,transcript F6QR23 F6QR23_MONDO,transcript F6T830 | Lk | 57% | 28.6 | 48.07    | Ref | 0.31  | 0.024 | 0.045 | -0.3  | Value Missing (-2.907764) | -0.19 | 0.29 | 128 | 124 | 110 | 126 | 109 | Value Missing (-2.907764) | 107 | 148 | 653.4 | 1957.2 | 3 | 0.0093 | 4.768 |

|                                                                      |                                                                                                                                                                                                                                                                                                                              |                           |     |      |          |     |       |       |       |       |       |       |      |      |      |       |       |       |       |      |       |       |        |   |        |       |
|----------------------------------------------------------------------|------------------------------------------------------------------------------------------------------------------------------------------------------------------------------------------------------------------------------------------------------------------------------------------------------------------------------|---------------------------|-----|------|----------|-----|-------|-------|-------|-------|-------|-------|------|------|------|-------|-------|-------|-------|------|-------|-------|--------|---|--------|-------|
| Barrier-to-autointegration factor OS=Mus musculus GN=Banf1 PE=1 SV=1 | 2 BAF_M<br>OUSE,sp <br>O75531 B<br>AF_HUM<br>AN,sp P6<br>1283 BAF<br>_BOVIN,s<br>p Q5RBU<br>9 BAF_P<br>ONAB,sp <br>Q9R1T1 B<br>AF_RAT,tr<br> B2R4V4 <br>B2R4V4_<br>HUMAN,t<br>r D2H4N2<br> D2H4N2<br>_AILME,tr<br> E2RGE0 <br>E2RGE0_C<br>ANFA,tr F<br>1RU33 F1<br>RU33_PIG<br>,tr F6QR2<br>3 F6QR23<br>_MONDO,<br>tr F6T830 | ayVV<br>LGQ<br>FLVL<br>k  | 53% | 22.3 | 44.2695  | Ref | -0.36 | -0.07 | -0.02 | -0.19 | -0.18 | -0.05 | 0.11 | 940  | 696  | 925   | 1070  | 1050  | 925   | 1050 | 1170  | 566.4 | 2261.4 | 4 | 0.003  | 1.341 |
| Prothymosin alpha OS=Bos taurus GN=PTMA PE=1 SV=2                    | 2 PTMA_<br>BOVIN,sp<br> P06454 <br>PTMA_HU<br>MAN,sp <br>Q5R790 P<br>TMA_PO<br>NAB,tr B8<br>ZZQ6 B8Z<br>ZQ6_HU<br>MAN,tr C<br>3VVV8 C3<br>VVV8_PIG<br>,tr E7CYG<br>5 E7CYG5<br>_AILME,tr<br> F7GZS2 <br>F7GZS2_<br>MACMU,t<br>r Q15202<br> Q15202_<br>HUMAN,t<br>r Q15204<br> Q15204_<br>HUMAN,t<br>r Q29286<br> Q29286_     | aAE<br>DDE<br>DDD<br>VDTk | 95% | 54.8 | 49.71378 | Ref | -0.29 | 0.3   | -0.04 | 0.074 | 0.67  | -0.19 | 0.69 | 9580 | 7170 | 11700 | 10400 | 12400 | 16400 | 9420 | 17300 | 682.7 | 2044.9 | 3 | 0.0213 | 10.43 |

|                                                            |                                                                                                                                                                                                                                                                                                                          |                           |     |      |          |     |        |      |       |       |      |       |      |       |       |       |       |        |       |       |        |       |        |   |        |       |
|------------------------------------------------------------|--------------------------------------------------------------------------------------------------------------------------------------------------------------------------------------------------------------------------------------------------------------------------------------------------------------------------|---------------------------|-----|------|----------|-----|--------|------|-------|-------|------|-------|------|-------|-------|-------|-------|--------|-------|-------|--------|-------|--------|---|--------|-------|
| Prothymosin alpha<br>OS=Bos taurus<br>GN=PTMA PE=1<br>SV=2 | 2 PTMA_<br>BOVIN,sp<br> P06454 <br>PTMA_HU<br>MAN,sp <br>Q5R790 P<br>TMA_PO<br>NAB,tr B8<br>ZZQ6 B8Z<br>ZQ6_HU<br>MAN,tr C<br>3VVV8 C3<br>VVV8_PIG<br>,tr E7CYG<br>5 E7CYG5<br>_AILME,tr<br> F7GZS2 <br>F7GZS2_<br>MACMU,t<br>r Q15202<br> Q15202_<br>HUMAN,t<br>r Q15204<br> Q15204_<br>HUMAN,t<br>r Q29286<br> Q29286_ | aAE<br>DDE<br>DDD<br>VDTk | 91% | 44.3 | 53.93819 | Ref | -0.88  | -0   | 0.092 | 0.19  | 0.98 | -0.45 | 0.77 | 75500 | 37400 | 74500 | 89300 | 105000 | 2E+05 | 61700 | 143000 | 620.3 | 2477.2 | 4 | 0.0296 | 11.96 |
| Prothymosin alpha<br>OS=Bos taurus<br>GN=PTMA PE=1<br>SV=2 | 2 PTMA_<br>BOVIN,sp<br> P06454 <br>PTMA_HU<br>MAN,sp <br>Q5R790 P<br>TMA_PO<br>NAB,tr B8<br>ZZQ6 B8Z<br>ZQ6_HU<br>MAN,tr C<br>3VVV8 C3<br>VVV8_PIG<br>,tr E7CYG<br>5 E7CYG5<br>_AILME,tr<br> F7GZS2 <br>F7GZS2_<br>MACMU,t<br>r Q15202<br> Q15202_<br>HUMAN,t<br>r Q15204<br> Q15204_<br>HUMAN,t<br>r Q29286<br> Q29286_ | eVVE<br>EAEn<br>GR        | 90% | 40   | 49.70714 | Ref | -0.002 | 0.23 | 0.18  | 0.048 | 0.54 | 0.024 | 0.34 | 21500 | 17800 | 22600 | 24600 | 24800  | 30300 | 22200 | 27500  | 718.9 | 1435.7 | 2 | 0.0132 | 9.16  |

|                                                                            |                                                                                                                                                                                                                                                         |     |      |          |     |       |       |       |       |      |       |       |       |       |       |       |       |       |       |       |       |        |   |        |       |
|----------------------------------------------------------------------------|---------------------------------------------------------------------------------------------------------------------------------------------------------------------------------------------------------------------------------------------------------|-----|------|----------|-----|-------|-------|-------|-------|------|-------|-------|-------|-------|-------|-------|-------|-------|-------|-------|-------|--------|---|--------|-------|
| Prothymosin alpha<br>OS=Bos taurus<br>GN=PTMA PE=1<br>SV=2                 | 2 PTMA_ BOVIN,sp  P06454  PTMA_HUMAN,sp  Q5R790 PTMA_PO NAB,tr B8ZZQ6 B8Z ZQ6_HUMAN,tr C3V VV8 C3V VV8_PIG ,tr E7CYG5  E7CYG5 _ALME,tr  F7GZS2  F7GZS2_ MACMU,t r Q15202  Q15202_ HUMAN,t r Q15204  Q15204_ HUMAN,t r Q29286  Q29286_ sDA AVD TSSEI TTK | 95% | 61.8 | 51.95812 | Ref | -0.26 | 0.19  | 0.18  | 0.18  | 0.45 | -0.33 | 0.52  | 454   | 257   | 382   | 424   | 467   | 494   | 299   | 535   | 885.9 | 1769.9 | 2 | 0.0028 | 1.577 |
| Synaptosomal-associated protein<br>OS=Bos taurus<br>GN=SNAP23 PE=3<br>SV=1 | tr F1MZ54 F1MZ54_BOVIN, tr Q2T9M8 Q2T9M8_BOVIN, aNQ VTDE SLES TR                                                                                                                                                                                        | 95% | 54   | 51.9752  | Ref | -0.47 | -0.39 | -0.03 | -0.28 | 0.31 | -0.77 | 0.13  | 15400 | 8950  | 10200 | 14800 | 13700 | 18000 | 8870  | 16500 | 877.4 | 1752.9 | 2 | 0.0112 | 6.387 |
| Synaptosomal-associated protein<br>OS=Bos taurus<br>GN=SNAP23 PE=3<br>SV=1 | tr F1MZ54 F1MZ54_BOVIN, tr Q2T9M8 Q2T9M8_BOVIN, aTW GDG GDN SPSN IVSk                                                                                                                                                                                   | 95% | 75.4 | 54.03801 | Ref | -0.29 | -0.15 | -0.21 | -0.19 | 0.26 | -0.67 | -0    | 14700 | 10400 | 12400 | 13400 | 14900 | 17800 | 9730  | 15400 | 771.7 | 2312.2 | 3 | 0.0185 | 7.985 |
| Synaptosomal-associated protein<br>OS=Bos taurus<br>GN=SNAP23 PE=3<br>SV=1 | tr F1MZ54 F1MZ54_BOVIN, tr Q2T9M8 Q2T9M8_BOVIN, tITM LDE QGE QlKR                                                                                                                                                                                       | 52% | 33.7 | 54.10725 | Ref | -0.34 | -0.41 | 0.041 | -0.13 | 0.18 | -0.66 | 0.072 | 15100 | 10400 | 10700 | 16500 | 16200 | 17500 | 10200 | 16800 | 757.4 | 2269.2 | 3 | 0.0152 | 6.69  |

|                                                                              |                                                                                                                                                                                                                             |                           |     |      |          |     |        |       |       |       |       |       |       |       |       |       |       |       |       |       |       |       |        |   |        |       |
|------------------------------------------------------------------------------|-----------------------------------------------------------------------------------------------------------------------------------------------------------------------------------------------------------------------------|---------------------------|-----|------|----------|-----|--------|-------|-------|-------|-------|-------|-------|-------|-------|-------|-------|-------|-------|-------|-------|-------|--------|---|--------|-------|
| Synaptosomal-associated protein OS=Bos taurus GN=SNAP23 PE=3 SV=1            | tr F1MZ54 F1MZ54_BOVIN, tr Q2T9M8 Q2T9M8_BOVIN                                                                                                                                                                              | vTnG QPQ QAT AGA ASG GYIK | 95% | 80.1 | 55.07625 | Ref | -0.32  | 0.49  | -0.02 | -0.38 | -0.02 | -1.1  | 0.061 | 914   | 763   | 1450  | 1150  | 979   | 1100  | 537   | 1210  | 843.5 | 2527.3 | 3 | 0.0168 | 6.655 |
| Putative RNA-binding protein Luc7-like 2 OS=Mus musculus GN=Luc7l2 PE=1 SV=1 | 4 LC7L2_MOUSE,s p Q9Y383 LC7L2_HUMAN, tr B2RYP6 B2RYP6_RA T, tr B3KR R1 B3KRR1_HUMAN, tr B3KSL5 B3KSL5_HUMAN, tr B7Z4Q3 B7Z4Q3_HUMAN, tr B7Z500 B7Z500_HUMAN, tr D2GYM7 D2GYM7_AILME, tr E2QTS3 E2QTS3_CA NFA, tr E2QTS4 E2 | aDYE IASK                 | 86% | 40.2 | 52.36157 | Ref | -0.027 | -0.24 | -0.09 | -0.21 | 0.082 | -0.44 | -0.03 | 22800 | 19800 | 18500 | 23100 | 23400 | 25000 | 18200 | 24100 | 752.9 | 1503.8 | 2 | 0.025  | 16.61 |





|                                                                                       |                                                                                                                                                                                                                                                            |                            |     |      |          |     |       |       |       |       |      |                           |       |       |       |       |       |       |       |                           |       |       |        |   |        |      |
|---------------------------------------------------------------------------------------|------------------------------------------------------------------------------------------------------------------------------------------------------------------------------------------------------------------------------------------------------------|----------------------------|-----|------|----------|-----|-------|-------|-------|-------|------|---------------------------|-------|-------|-------|-------|-------|-------|-------|---------------------------|-------|-------|--------|---|--------|------|
| Putative RNA-binding protein<br>Luc7-like 2 OS=Mus musculus<br>GN=Luc7l2 PE=1<br>SV=1 | 4 LC7L2_MOUSE,s<br>p Q9Y383<br> LC7L2_HUMAN,tr <br>B2RYP6 B2RYP6_RA<br>T,tr B3KRR1 B3KRR1_HUMAN,<br>tr B3KSL5_HUMAN,<br>tr B7Z4Q3 B7Z4Q3_HUMAN,<br>tr B7Z500 B7Z500_HUMAN,<br>tr D2GYM7 D2GYM7_AIL<br>ME,tr E2QTS3 E2QTS3_CA<br>NFA,tr E2QTS4 E2           | VEQL<br>GAE<br>GNV<br>EESQ | 82% | 41.2 | 54.29125 | Ref | 0.062 | -0.27 | -0.08 | -0.27 | 0.1  | -0.4                      | 0.04  | 24300 | 24900 | 21500 | 27500 | 26400 | 30000 | 22100                     | 29700 | 742.4 | 2224.2 | 3 | 0.0251 | 11.3 |
| Serine/arginine-rich<br>splicing factor 7<br>OS=Homo sapiens<br>GN=SRSF7 PE=1<br>SV=1 | 9 SRSF7_HUMAN,s<br>p Q3T106<br> SRSF7_BOVIN,sp <br>Q8BL97 SRSF7_MOUSE,tr A6<br>NNE8 A6NNE8_HUMAN,<br>tr A6YLN1 A6YLN1_CER<br>EL,tr B4DEK2 B4DEK2_HUMAN,<br>tr C9JAB2 C9JAB2_HUMAN,<br>tr D2HNQ2 D2HNQ2_AIL<br>ME,tr D3Z964 D3Z964_RAT,<br>tr D4A720 D4A720 | gHYA<br>YDcH<br>R          | 95% | 43   | 44.8484  | Ref | 0.2   | -0.11 | 0.058 | -0.37 | 0.33 | Value Missing (-1.641423) | 0.054 | 21800 | 21700 | 18900 | 23900 | 19700 | 27800 | Value Missing (-1.641423) | 23800 | 368.7 | 1470.6 | 4 | 0.0139 | 9.47 |



|                                                                                                |                                                                                                                                                                                                                                                 |                                       |            |             |                 |            |               |              |              |              |             |              |             |              |              |              |              |              |              |              |              |              |             |          |               |              |
|------------------------------------------------------------------------------------------------|-------------------------------------------------------------------------------------------------------------------------------------------------------------------------------------------------------------------------------------------------|---------------------------------------|------------|-------------|-----------------|------------|---------------|--------------|--------------|--------------|-------------|--------------|-------------|--------------|--------------|--------------|--------------|--------------|--------------|--------------|--------------|--------------|-------------|----------|---------------|--------------|
| <p>Serine/arginine-rich splicing factor 7<br/>OS=Homo sapiens<br/>GN=SRSF7 PE=1<br/>SV=1</p>   | <p>9 SRSF7_ HUMAN,sp Q3T106 SRSF7_BOVIN,sp Q8BL97 SRSF7_MOUSE,trans A6NNE8 A6NNE8_HUMAN,trans A6YLN1 A6YLN1_CEREL,trans B4DEK2 B4DEK2_HUMAN,trans C9JAB2 C9JAB2_HUMAN,trans D2HNQ2 D2HNQ2_AILME,trans D3Z964 D3Z964_RAT,trans D4A720 D4A720</p> | <p>vYVG<br/>NLG<br/>TGA<br/>Gk</p>    | <p>90%</p> | <p>45.5</p> | <p>52.96573</p> | <p>Ref</p> | <p>-0.01</p>  | <p>-0.09</p> | <p>-0.06</p> | <p>-0.31</p> | <p>0.1</p>  | <p>-0.38</p> | <p>-0</p>   | <p>44900</p> | <p>40000</p> | <p>41000</p> | <p>47200</p> | <p>43500</p> | <p>50700</p> | <p>37800</p> | <p>48800</p> | <p>582</p>   | <p>1743</p> | <p>3</p> | <p>0.0178</p> | <p>10.18</p> |
| <p>ATP synthase subunit alpha, mitochondrial<br/>OS=Bos taurus<br/>GN=ATP5A1 PE=1<br/>SV=1</p> | <p>sp P19483 ATPA_BOVIN,trans B2ZF46 B2ZF46_PIG,trans E2RNG2 E2RNG2_CANFA,trans F1MLB8 F1MLB8_BOVIN,trans F1RPS8 F1RPS8_PIG,trans F1T2M2 F1T2M2_ME SAU,trans F6V9Q4 F6V9Q4_OR NAN</p>                                                           | <p>iLGA<br/>DTSV<br/>DLEE<br/>TGR</p> | <p>95%</p> | <p>65.6</p> | <p>53.31348</p> | <p>Ref</p> | <p>-0.021</p> | <p>-0.09</p> | <p>-0.01</p> | <p>-0.1</p>  | <p>0.24</p> | <p>-0.18</p> | <p>0.13</p> | <p>3120</p>  | <p>3060</p>  | <p>3170</p>  | <p>3770</p>  | <p>3890</p>  | <p>4290</p>  | <p>3360</p>  | <p>4140</p>  | <p>940.5</p> | <p>1879</p> | <p>2</p> | <p>0.0141</p> | <p>7.521</p> |

|                                                                             |                                                                                                                                                                    |                     |     |      |          |     |       |       |       |        |      |       |       |       |      |      |       |      |       |      |      |       |        |   |        |       |
|-----------------------------------------------------------------------------|--------------------------------------------------------------------------------------------------------------------------------------------------------------------|---------------------|-----|------|----------|-----|-------|-------|-------|--------|------|-------|-------|-------|------|------|-------|------|-------|------|------|-------|--------|---|--------|-------|
| ATP synthase subunit alpha, mitochondrial OS=Bos taurus GN=ATP5A1 PE=1 SV=1 | sp P19483 ATPA_BOVIN, tr B2ZF46 B2ZF46_PIG, tr E2RNG2 E2RNG2_CANFA, tr F1MLB8 F1MLB8_BOVIN, tr F1RPS8 F1RPS8_PIG, tr F1T2M2 F1T2M2_ME SAU, tr F6V9Q4 F6V9Q4_OR NAN | nVQ AEE MVE FSSG Lk | 87% | 44.1 | 54.43932 | Ref | -0.25 | -0.15 | -0.11 | -9E-04 | -0   | 0.045 | 0.015 | 6520  | 4030 | 4710 | 5420  | 6440 | 5610  | 6060 | 5900 | 759.4 | 2275.2 | 3 | 0.0206 | 9.032 |
| ATP synthase subunit alpha, mitochondrial OS=Bos taurus GN=ATP5A1 PE=1 SV=1 | sp P19483 ATPA_BOVIN, tr B2ZF46 B2ZF46_PIG, tr E2RNG2 E2RNG2_CANFA, tr F1MLB8 F1MLB8_BOVIN, tr F1RPS8 F1RPS8_PIG, tr F1T2M2 F1T2M2_ME SAU, tr F6V9Q4 F6V9Q4_OR NAN | tGTA EVSS ILEE R    | 89% | 42.3 | 52.95264 | Ref | 0.024 | 0.023 | 0.13  | -0.32  | 0.13 | -0.24 | -0.07 | 10300 | 8500 | 9210 | 11200 | 8960 | 10700 | 8650 | 9680 | 848.5 | 1694.9 | 2 | 0.0113 | 6.684 |

|                                                                                |                                                                                                                                                                         |                     |     |      |          |     |       |       |       |        |       |       |       |       |       |       |       |       |       |       |       |       |        |   |        |       |
|--------------------------------------------------------------------------------|-------------------------------------------------------------------------------------------------------------------------------------------------------------------------|---------------------|-----|------|----------|-----|-------|-------|-------|--------|-------|-------|-------|-------|-------|-------|-------|-------|-------|-------|-------|-------|--------|---|--------|-------|
| ATP synthase subunit alpha, mitochondrial OS=Bos taurus GN=ATP5A1 PE=1 SV=1    | sp P19483 ATPA_BOVIN, tr B2ZF46 B2ZF46_PIG, tr E2RNG2 E2RNG2_CANFA, tr F1MLB8 F1MLB8_BOVIN, tr F1RPS8 F1RPS8_PIG, tr F1T2M2 F1T2M2_ME SAU, tr F6V9Q4 F6V9Q4_OR NAN      | VLSI GDGI AR        | 57% | 31.6 | 51.33913 | Ref | -0.28 | 0.13  | 0.032 | -0.3   | 0.24  | -0.14 | 0.16  | 15700 | 12100 | 17400 | 18200 | 16000 | 20200 | 16300 | 19800 | 652.9 | 1303.8 | 2 | 0.0134 | 10.27 |
| Peptidyl-prolyl cis-trans isomerase FKBP10 OS=Homo sapiens GN=FKBP10 PE=1 SV=1 | sp Q96AY3 FKB10_HUMAN, tr D2HIR8 D2HIR8_AILME, tr E2QZA8 E2QZA8_C ANFA, tr F5H1P8 F5H1P8_HUMAN, tr F7H5Q0 F7H5Q0_M ACMU, tr Q658U4 Q658U4_HUMAN, tr Q6ZME7 Q6ZME7_HUMAN | GGT yDTY VGS GWL lk | 91% | 47.7 | 54.48196 | Ref | 0.14  | 0.098 | -0.03 | -0.018 | -0.02 | 0.14  | 0.059 | 3500  | 3200  | 3380  | 3470  | 3860  | 3360  | 3910  | 3680  | 742.4 | 2224.2 | 3 | 0.0229 | 10.29 |

|                                                                                   |                                                                                                                                                                       |                                   |     |      |          |     |       |      |       |       |                         |       |       |      |      |      |      |      |                         |      |      |       |        |   |        |       |
|-----------------------------------------------------------------------------------|-----------------------------------------------------------------------------------------------------------------------------------------------------------------------|-----------------------------------|-----|------|----------|-----|-------|------|-------|-------|-------------------------|-------|-------|------|------|------|------|------|-------------------------|------|------|-------|--------|---|--------|-------|
| Peptidyl-prolyl cis-trans isomerase<br>FKBP10 OS=Homo sapiens GN=FKBP10 PE=1 SV=1 | sp Q96AY3 FKB10_HUMAN, tr D2HIR8 D2HIR8_AILME, tr E2QZA8 E2QZA8_CANFA, tr F5H1P8 F5H1P8_HUMAN, tr F7H5Q0 F7H5Q0_MACMU, tr Q658U4 Q658U4_HUMAN, tr Q6ZME7 Q6ZME7_HUMAN | gLM<br>GMc<br>VNE<br>R            | 53% | 26.9 | 47.33936 | Ref | 0.073 | 0.16 | 0.087 | 0.022 | -0.19                   | 0.19  | 0.15  | 7350 | 7140 | 8230 | 8780 | 9250 | 6970                    | 9450 | 9180 | 730.3 | 1458.7 | 2 | 0.0141 | 9.678 |
| Peptidyl-prolyl cis-trans isomerase<br>FKBP10 OS=Homo sapiens GN=FKBP10 PE=1 SV=1 | sp Q96AY3 FKB10_HUMAN, tr D2HIR8 D2HIR8_AILME, tr E2QZA8 E2QZA8_CANFA, tr F5H1P8 F5H1P8_HUMAN, tr F7H5Q0 F7H5Q0_MACMU, tr Q658U4 Q658U4_HUMAN, tr Q6ZME7 Q6ZME7_HUMAN | gVP<br>GSA<br>VLLF<br>EVEL<br>VSR | 95% | 57.3 | 53.02619 | Ref | 0.41  | 0.37 | 0.2   | 0.24  | Value Missing (-1.4948) | -0.14 | 0.028 | 145  | 154  | 162  | 161  | 183  | Value Missing (-1.4948) | 128  | 143  | 692.7 | 2075.2 | 3 | 0.0116 | 5.577 |

|                                                                                   |                                                                                                                                                                       |                               |     |      |          |     |                              |                      |                                |                               |                              |                       |                                |                        |                               |                                |                                 |                                |                                  |                       |                                |       |        |   |        |       |
|-----------------------------------------------------------------------------------|-----------------------------------------------------------------------------------------------------------------------------------------------------------------------|-------------------------------|-----|------|----------|-----|------------------------------|----------------------|--------------------------------|-------------------------------|------------------------------|-----------------------|--------------------------------|------------------------|-------------------------------|--------------------------------|---------------------------------|--------------------------------|----------------------------------|-----------------------|--------------------------------|-------|--------|---|--------|-------|
| Peptidyl-prolyl cis-trans isomerase<br>FKBP10 OS=Homo sapiens GN=FKBP10 PE=1 SV=1 | sp Q96AY3 FKB10_HUMAN, tr D2HIR8 D2HIR8_AILME, tr E2QZA8 E2QZA8_CANFA, tr F5H1P8 F5H1P8_HUMAN, tr F7H5Q0 F7H5Q0_MACMU, tr Q658U4 Q658U4_HUMAN, tr Q6ZME7 Q6ZME7_HUMAN | iiIPP<br>FLAY<br>GK           | 83% | 38.9 | 51.27911 | Ref | 0.058                        | 0.042                | 0.048                          | 0.066                         | -0.12                        | 0.16                  | 0.23                           | 5800                   | 5500                          | 5910                           | 6660                            | 7430                           | 5700                             | 7250                  | 7510                           | 657.1 | 1968.2 | 3 | 0.0298 | 15.11 |
| Calponin-3 OS=Bos taurus GN=CNN3 PE=2 SV=1                                        | sp Q32L92 CNN3_BOVIN, tr F1S543 F1S543_PIG, tr F7DC H4 F7DC H4_HORSE                                                                                                  | dYQY<br>GDQ<br>GIDY           | 94% | 39.2 | 45.84535 | Ref | 0.055                        | -0.31                | -0.12                          | -0.061                        | -0.26                        | 0.065                 | -0.18                          | 175                    | 175                           | 148                            | 190                             | 217                            | 166                              | 216                   | 181                            | 820.9 | 1639.7 | 2 | 0.019  | 11.59 |
| Calponin-3 OS=Bos taurus GN=CNN3 PE=2 SV=1                                        | sp Q32L92 CNN3_BOVIN, tr F1S543 F1S543_PIG, tr F7DC H4 F7DC H4_HORSE                                                                                                  | dYQY<br>GDQ<br>GIDY           | 95% | 64.4 | 46.01702 | Ref | Reference Missing (0.364029) | Missing (0.14424513) | Reference Missing (0.05807696) | Reference Missing (0.0939032) | Reference Missing (0.448569) | No Values (-1.810455) | Reference Missing (0.10453317) | No Values (-1.7207737) | Reference Missing (0.3640029) | Reference Missing (0.14424513) | Reference Missing (0.058076967) | Reference Missing (0.09399032) | Reference Missing (0.4448569455) | No Values (-1.810455) | Reference Missing (0.10453317) | 820.9 | 1639.7 | 2 | 0.0165 | 10.03 |
| Calponin-3 OS=Bos taurus GN=CNN3 PE=2 SV=1                                        | sp Q32L92 CNN3_BOVIN, tr F1S543 F1S543_PIG, tr F7DC H4 F7DC H4_HORSE                                                                                                  | gAS<br>QAG<br>MLA<br>PGT<br>R | 85% | 39.3 | 52.18231 | Ref | -0.053                       | -0.16                | -0.05                          | -0.25                         | -0.06                        | -0.2                  | -0.15                          | 10500                  | 8800                          | 8880                           | 10700                           | 10300                          | 10200                            | 9710                  | 10000                          | 760.9 | 1519.8 | 2 | 0.0107 | 7.046 |



|                                                         |                                                                        |                    |     |      |          |     |      |       |       |        |       |       |       |       |       |       |       |       |       |       |       |       |        |   |        |       |
|---------------------------------------------------------|------------------------------------------------------------------------|--------------------|-----|------|----------|-----|------|-------|-------|--------|-------|-------|-------|-------|-------|-------|-------|-------|-------|-------|-------|-------|--------|---|--------|-------|
| Calponin-3 OS=Bos taurus GN=CNN3 PE=2 SV=1              | sp Q32L92 CNN3_BOVIN, tr F1S543 F1S543_PI G, tr F7DC H4 F7DC H4_HORS E | gPSY GLSA EVK      | 95% | 52.5 | 52.82668 | Ref | -0.1 | 0.076 | -0.21 | -0.31  | -0.17 | -0.06 | -0.18 | 5050  | 4060  | 4980  | 4590  | 4720  | 4540  | 5100  | 4670  | 858.5 | 1715   | 2 | 0.0166 | 9.663 |
| Uncharacterized protein OS=Bos taurus GN=GLG1 PE=4 SV=1 | tr E1BDY3 E1BDY3_BOVIN                                                 | cAV GVT HFQ LVQ Mk | 92% | 48.3 | 54.36297 | Ref | 0.28 | -0.41 | 0.27  | -0.096 | 0.1   | -0.12 | 0.081 | 1830  | 1870  | 1260  | 2260  | 1940  | 1940  | 1740  | 1980  | 739.1 | 2214.2 | 3 | 0.0101 | 4.543 |
| Uncharacterized protein OS=Bos taurus GN=GLG1 PE=4 SV=1 | tr E1BDY3 E1BDY3_BOVIN                                                 | hHcA AITP GR       | 83% | 37.9 | 50.51777 | Ref | 0.13 | -0.07 | 0.16  | -0.045 | 0.29  | -0.24 | 0.11  | 18300 | 19200 | 18100 | 23800 | 22800 | 25100 | 18200 | 23000 | 471.6 | 1411.7 | 3 | 0.0102 | 7.195 |
| Uncharacterized protein OS=Bos taurus GN=GLG1 PE=4 SV=1 | tr E1BDY3 E1BDY3_BOVIN                                                 | I LEL QYFI SR      | 77% | 36.3 | 52.03427 | Ref | 0.36 | -0.27 | 0.15  | -0.17  | 0.12  | -0.29 | 0.13  | 1230  | 1260  | 887   | 1340  | 1180  | 1260  | 986   | 1310  | 793.5 | 1584.9 | 2 | 0.0145 | 9.141 |
| Uncharacterized protein OS=Bos taurus GN=GLG1 PE=4 SV=1 | tr E1BDY3 E1BDY3_BOVIN                                                 | ISSD cED QIR       | 86% | 35.8 | 48.04242 | Ref | 0.37 | -0.35 | 0.084 | -0.11  | 0.22  | -0.25 | 0.19  | 29600 | 34300 | 22500 | 34200 | 33100 | 36100 | 27300 | 36900 | 758.4 | 1514.7 | 2 | 0.0138 | 9.09  |

|                                                               |                                                                                                                                                                                    |                   |     |    |          |     |        |      |       |       |      |       |       |       |       |       |       |       |       |       |       |       |        |   |        |       |
|---------------------------------------------------------------|------------------------------------------------------------------------------------------------------------------------------------------------------------------------------------|-------------------|-----|----|----------|-----|--------|------|-------|-------|------|-------|-------|-------|-------|-------|-------|-------|-------|-------|-------|-------|--------|---|--------|-------|
| Prefoldin subunit 2<br>OS=Bos taurus<br>GN=PFDN2 PE=2<br>SV=1 | sp A1A4P5 PFD2_BOVIN,sp Q9UHV9 PFD2_HUMAN,tr B1AQP2 B1AQP2_HUMAN,tr F1S192 F1S192_PIG,tr F6V169 F6V169_MACMU,tr F6W739 F6W739_HORSE,tr F7F6X9 F7F6X9_CALJIA,tr Q862M6 Q862M6_BOVIN | enSE<br>GAG<br>Ak | 62% | 33 | 51.51667 | Ref | -0.071 | 0.22 | 0.092 | 0.056 | 0.26 | -0.08 | 0.24  | 18600 | 14300 | 19100 | 19600 | 21000 | 21200 | 17400 | 21700 | 491.3 | 1470.8 | 3 | 0.0237 | 16.13 |
| Prefoldin subunit 2<br>OS=Bos taurus<br>GN=PFDN2 PE=2<br>SV=1 | sp A1A4P5 PFD2_BOVIN,sp Q9UHV9 PFD2_HUMAN,tr B1AQP2 B1AQP2_HUMAN,tr F1S192 F1S192_PIG,tr F6V169 F6V169_MACMU,tr F6W739 F6W739_HORSE,tr F7F6X9 F7F6X9_CALJIA,tr Q862M6 Q862M6_BOVIN | enSE<br>GAG<br>Ak | 79% | 37 | 52.06877 | Ref | -0.29  | 0.29 | 0.26  | 0.17  | 0.38 | -0.24 | 0.054 | 8980  | 5930  | 9610  | 10600 | 11000 | 11000 | 7500  | 9140  | 736.4 | 1470.8 | 2 | 0.0024 | 1.637 |

|                                                                         |                                                                                                                                                                                            |                                      |     |      |          |     |        |      |      |        |      |      |      |      |      |      |      |      |      |      |      |       |        |   |        |       |
|-------------------------------------------------------------------------|--------------------------------------------------------------------------------------------------------------------------------------------------------------------------------------------|--------------------------------------|-----|------|----------|-----|--------|------|------|--------|------|------|------|------|------|------|------|------|------|------|------|-------|--------|---|--------|-------|
| <p>Prefoldin subunit 2<br/>OS=Bos taurus<br/>GN=PFDN2 PE=2<br/>SV=1</p> | <p>sp A1A4P5 PFD2_BOVIN,sp Q9UHV9 PFD2_HUMAN,tr B1AQP2 B1AQP2_HUMAN,tr F1S192 F1S192_PIG,tr F6V169 F6V169_MACMU,tr F6W739 F6W739_HORSE,tr F7F6X9 F7F6X9_CALJIA, tr Q862M6 Q862M6_BOVIN</p> | <p>gAVS<br/>AEQ<br/>VIAG<br/>FNR</p> | 95% | 58.4 | 53.05859 | Ref | -0.078 | 0.23 | 0.17 | 0.19   | 0.37 | -0.1 | 0.13 | 2980 | 2680 | 3610 | 3870 | 4320 | 4290 | 3240 | 3770 | 862   | 1721.9 | 2 | 0.0111 | 6.436 |
| <p>Prefoldin subunit 2<br/>OS=Bos taurus<br/>GN=PFDN2 PE=2<br/>SV=1</p> | <p>sp A1A4P5 PFD2_BOVIN,sp Q9UHV9 PFD2_HUMAN,tr B1AQP2 B1AQP2_HUMAN,tr F1S192 F1S192_PIG,tr F6V169 F6V169_MACMU,tr F6W739 F6W739_HORSE,tr F7F6X9 F7F6X9_CALJIA, tr Q862M6 Q862M6_BOVIN</p> | <p>IIETL<br/>TQQ<br/>LQAK</p>        | 95% | 56.1 | 50.45053 | Ref | 0.059  | 0.16 | 0.14 | -0.045 | 0.27 | 0.1  | 0.26 | 521  | 509  | 591  | 656  | 636  | 693  | 642  | 710  | 665.4 | 1993.2 | 3 | 0.011  | 5.527 |

|                                                                             |                                                                                                                         |                                        |     |      |          |     |       |       |       |        |       |       |       |       |       |       |       |       |       |       |       |       |        |   |        |       |
|-----------------------------------------------------------------------------|-------------------------------------------------------------------------------------------------------------------------|----------------------------------------|-----|------|----------|-----|-------|-------|-------|--------|-------|-------|-------|-------|-------|-------|-------|-------|-------|-------|-------|-------|--------|---|--------|-------|
| F-actin-capping protein subunit alpha-1 OS=Pongo abelii GN=CAPZA1 PE=2 SV=3 | sp Q5NV M0 CAZA1_PONAB, tr F6QI70 F6QI70_CALJA, tr F6QUE9 F6QUE9_CALJA, tr F6R5F1 F6R5F1_MA CMU, tr F6WWW7 F6WWW7_HORSE | eAS<br>DPQ<br>PEEV<br>DGG<br>Lk        | 91% | 46.9 | 53.93305 | Ref | -0.14 | 0.67  | -0.19 | -0.034 | 0.06  | -0.11 | 0.009 | 16700 | 12000 | 22800 | 14100 | 17400 | 16200 | 15000 | 16200 | 727   | 2178.1 | 3 | 0.0173 | 7.952 |
| F-actin-capping protein subunit alpha-1 OS=Pongo abelii GN=CAPZA1 PE=2 SV=3 | sp Q5NV M0 CAZA1_PONAB, tr F6QI70 F6QI70_CALJA, tr F6QUE9 F6QUE9_CALJA, tr F6R5F1 F6R5F1_MA CMU, tr F6WWW7 F6WWW7_HORSE | fITH<br>APP<br>GEF<br>NEVF<br>NDV<br>R | 92% | 48.9 | 54.15613 | Ref | 0.24  | 0.1   | 0.068 | 0.16   | 0.099 | 3E-04 | 0.16  | 1200  | 1500  | 1480  | 1630  | 1910  | 1600  | 1560  | 1720  | 798.4 | 2392.2 | 3 | 0.0145 | 6.069 |
| F-actin-capping protein subunit alpha-1 OS=Pongo abelii GN=CAPZA1 PE=2 SV=3 | sp Q5NV M0 CAZA1_PONAB, tr F6QI70 F6QI70_CALJA, tr F6QUE9 F6QUE9_CALJA, tr F6R5F1 F6R5F1_MA CMU, tr F6WWW7 F6WWW7_HORSE | fTITP<br>PTA<br>QVV<br>GVlk            | 87% | 39.5 | 49.66733 | Ref | 0.35  | -0.08 | 0.16  | 0.001  | -0.1  | 0.15  | -0.04 | 8060  | 8480  | 6850  | 9060  | 8940  | 7300  | 9060  | 7890  | 727.1 | 2178.3 | 3 | 0.0108 | 4.958 |

|                                                                                                 |                                                                                                                         |                    |     |      |          |     |        |       |       |       |      |       |       |       |       |       |       |       |       |       |       |       |        |   |        |       |
|-------------------------------------------------------------------------------------------------|-------------------------------------------------------------------------------------------------------------------------|--------------------|-----|------|----------|-----|--------|-------|-------|-------|------|-------|-------|-------|-------|-------|-------|-------|-------|-------|-------|-------|--------|---|--------|-------|
| F-actin-capping protein subunit alpha-1 OS=Pongo abelii GN=CAPZA1 PE=2 SV=3                     | sp Q5NV M0 CAZA1_PONAB, tr F6Q170 F6Q170_CALJA, tr F6QUE9 F6QUE9_CALJA, tr F6R5F1 F6R5F1_MA CMU, tr F6WWW7 F6WWW7_HORSE | fTITP PTA QVV GVLk | 92% | 44.3 | 49.80971 | Ref | 0.48   | -0.02 | 0.18  | 0.024 | -0.1 | 0.057 | -0.06 | 2160  | 2770  | 2130  | 2740  | 2710  | 2180  | 2530  | 2310  | 727.1 | 2178.3 | 3 | 0.0122 | 5.619 |
| Putative uncharacterized protein (Fragment) OS=Ailuropoda melanoleuca GN=PANDA_018794 PE=4 SV=1 | tr D2I0Q2 D2I0Q2_AILME, tr F1MQB4 F1MQB4_BOVIN, tr F1N770 F1N770_BOVIN, tr F1S93 F1S93_PIG, tr Q0VCQ9 Q0VCQ9_BOVIN      | eALL GGQ EEVD EYVk | 95% | 71.6 | 54.52263 | Ref | -0.083 | 0.34  | 0.053 | -0.35 | 0.43 | -0.64 | 0.29  | 16300 | 12700 | 18400 | 16900 | 14100 | 21200 | 10500 | 20000 | 763.1 | 2286.2 | 3 | 0.0187 | 8.155 |
| Putative uncharacterized protein (Fragment) OS=Ailuropoda melanoleuca GN=PANDA_018794 PE=4 SV=1 | tr D2I0Q2 D2I0Q2_AILME, tr F1MQB4 F1MQB4_BOVIN, tr F1N770 F1N770_BOVIN, tr F1S93 F1S93_PIG, tr Q0VCQ9 Q0VCQ9_BOVIN      | hYA MQE AK         | 62% | 33.8 | 52.3689  | Ref | 0.0072 | 0.16  | 0.039 | -0.19 | 0.24 | -0.25 | 0.32  | 27100 | 23500 | 28300 | 29200 | 27500 | 32400 | 24100 | 35400 | 529.3 | 1584.8 | 3 | 0.0139 | 8.776 |

|                                                                                                          |                                                                                                              |                            |     |      |          |     |       |       |       |        |       |       |       |       |       |       |       |       |       |       |       |       |        |   |        |       |
|----------------------------------------------------------------------------------------------------------|--------------------------------------------------------------------------------------------------------------|----------------------------|-----|------|----------|-----|-------|-------|-------|--------|-------|-------|-------|-------|-------|-------|-------|-------|-------|-------|-------|-------|--------|---|--------|-------|
| Putative uncharacterized protein (Fragment)<br>OS=Ailuropoda melanoleuca<br>GN=PANDA_018794<br>PE=4 SV=1 | tr D2IQ2 D2IQ2_AILME,tr F1MQB4 F1MQB4_BOVIN,tr F1N770 F1N770_BOVIN,tr F1S93 F1S93_PIG,tr Q0VCQ9 Q0VCQ9_BOVIN | hYA<br>mQE<br>Ak           | 79% | 37.7 | 52.00626 | Ref | 0.096 | -0.13 | 0.11  | -0.096 | 0.4   | -0.35 | 0.28  | 22300 | 20900 | 19400 | 25800 | 24600 | 30200 | 18800 | 28800 | 534.6 | 1600.8 | 3 | 0.0262 | 16.34 |
| Putative uncharacterized protein (Fragment)<br>OS=Ailuropoda melanoleuca<br>GN=PANDA_018794<br>PE=4 SV=1 | tr D2IQ2 D2IQ2_AILME,tr F1MQB4 F1MQB4_BOVIN,tr F1N770 F1N770_BOVIN,tr F1S93 F1S93_PIG,tr Q0VCQ9 Q0VCQ9_BOVIN | qLH<br>DEYF<br>YHD<br>EL   | 93% | 42.2 | 49.57579 | Ref | 0.16  | -0.23 | 0.03  | -0.18  | 0.51  | -0.41 | 0.51  | 1150  | 1350  | 1110  | 1490  | 1430  | 2000  | 1110  | 2080  | 956.9 | 1911.9 | 2 | 0.0145 | 7.579 |
| PGRMC2 protein<br>OS=Bos taurus<br>GN=PGRMC2 PE=2<br>SV=1                                                | tr A5PJQ6 A5PJQ6_BOVIN,tr A9LM01 A9LM01_PIG,tr D2HSJ7 D2HSJ7_AILME,tr F7GWG6 F7GWG6_CALJA                    | fYGP<br>AGP<br>YGIF<br>AGR | 92% | 47.4 | 52.67197 | Ref | -0.02 | -0.24 | -0.04 | -0.22  | -0.28 | -0.39 | 0.057 | 1870  | 1490  | 1380  | 1790  | 1740  | 1460  | 1420  | 1910  | 593   | 1775.9 | 3 | 0.0115 | 6.493 |

|                                                                   |                                                                                              |                                          |     |      |          |     |        |       |       |        |       |       |       |       |       |       |       |       |       |       |       |       |        |   |        |       |
|-------------------------------------------------------------------|----------------------------------------------------------------------------------------------|------------------------------------------|-----|------|----------|-----|--------|-------|-------|--------|-------|-------|-------|-------|-------|-------|-------|-------|-------|-------|-------|-------|--------|---|--------|-------|
| PGRMC2 protein<br>OS=Bos taurus<br>GN=PGRMC2 PE=2<br>SV=1         | tr A5PQ6 A5PQ6_BOVIN, tr A9LM01 A9LM01_PIG, tr D2HSJ7 D2HSJ7_AIL ME, tr F7GWG6 F7GWG6_C ALJA | gLAT<br>FcLD<br>k                        | 72% | 36.3 | 52.58738 | Ref | -0.31  | -0.18 | -0.11 | -0.14  | 0.065 | -0.37 | 0.012 | 5600  | 3870  | 4610  | 5440  | 5850  | 5890  | 4550  | 5880  | 541.3 | 1620.9 | 3 | 0.0255 | 15.73 |
| PGRMC2 protein<br>OS=Bos taurus<br>GN=PGRMC2 PE=2<br>SV=1         | tr A5PQ6 A5PQ6_BOVIN, tr A9LM01 A9LM01_PIG, tr D2HSJ7 D2HSJ7_AIL ME, tr F7GWG6 F7GWG6_C ALJA | iLLA<br>VnG<br>k                         | 55% | 26.5 | 46.50424 | Ref | -0.27  | -0.29 | 0.064 | -0.07  | -0.1  | -0.37 | 0.041 | 20400 | 14900 | 16000 | 22800 | 22900 | 19600 | 17000 | 22400 | 719   | 1435.9 | 2 | 0.0022 | 1.508 |
| PGRMC2 protein<br>OS=Bos taurus<br>GN=PGRMC2 PE=2<br>SV=1         | tr A5PQ6 A5PQ6_BOVIN, tr A9LM01 A9LM01_PIG, tr D2HSJ7 D2HSJ7_AIL ME, tr F7GWG6 F7GWG6_C ALJA | rGLG<br>AGA<br>GAG<br>EESP<br>AASL<br>PR | 92% | 47.9 | 54.11148 | Ref | -0.1   | -0.2  | -0.06 | -0.11  | 0.071 | -0.26 | -0.08 | 6170  | 5830  | 5900  | 7310  | 7780  | 7710  | 6400  | 7190  | 710   | 2127.1 | 3 | 0.0149 | 7.017 |
| Transcription factor<br>BTF3 OS=Mus musculus<br>GN=Btf3 PE=2 SV=3 | sp Q64152 BTF3_MOUSE                                                                         | kLQF<br>SLK                              | 59% | 25   | 44.43325 | Ref | -0.063 | -0.26 | 0.25  | -0.039 | 0.31  | -0.44 | 0.21  | 5820  | 4830  | 4550  | 7290  | 6590  | 7330  | 4540  | 7080  | 888.6 | 1775.1 | 2 | 0.006  | 3.357 |

|                                                                      |                              |                                     |     |      |          |     |       |       |      |        |      |       |      |       |       |       |       |       |       |       |       |       |        |   |        |       |
|----------------------------------------------------------------------|------------------------------|-------------------------------------|-----|------|----------|-----|-------|-------|------|--------|------|-------|------|-------|-------|-------|-------|-------|-------|-------|-------|-------|--------|---|--------|-------|
| Transcription factor<br>BTF3 OS=Mus<br>musculus GN=Btf3<br>PE=2 SV=3 | sp Q6415<br>2 BTF3_<br>MOUSE | tATA<br>DDk                         | 73% | 34.8 | 51.40404 | Ref | -0.15 | -0.14 | 0.26 | -0.066 | 0.37 | -0.53 | 0.2  | 51100 | 40400 | 44200 | 65500 | 57500 | 68000 | 38100 | 62500 | 665.4 | 1328.7 | 2 | 0.0251 | 18.9  |
| Transcription factor<br>BTF3 OS=Mus<br>musculus GN=Btf3<br>PE=2 SV=3 | sp Q6415<br>2 BTF3_<br>MOUSE | tGAP<br>TQA<br>DSR                  | 80% | 36.5 | 51.1388  | Ref | -0.01 | -0.1  | 0.22 | -0.17  | 0.33 | -0.43 | 0.12 | 4440  | 3710  | 3770  | 5280  | 4440  | 5490  | 3400  | 4930  | 654.3 | 1306.7 | 2 | 0.0067 | 5.116 |
| Transcription factor<br>BTF3 OS=Mus<br>musculus GN=Btf3<br>PE=2 SV=3 | sp Q6415<br>2 BTF3_<br>MOUSE | vQA<br>SLAA<br>NTFT<br>ITGH<br>AETk | 95% | 86.9 | 54.58831 | Ref | -0.25 | -0.32 | 0.4  | -0.01  | 0.18 | -0.37 | 0.31 | 3050  | 2240  | 2310  | 4270  | 3550  | 3530  | 2510  | 4000  | 856.8 | 2567.4 | 3 | 0.0164 | 6.382 |



|                                                                                          |                                                                                                                                                                                                                                           |                                                                                                                                                                                                                                           |                    |      |         |          |      |       |       |       |       |       |       |      |      |      |      |      |      |      |      |       |        |        |        |        |
|------------------------------------------------------------------------------------------|-------------------------------------------------------------------------------------------------------------------------------------------------------------------------------------------------------------------------------------------|-------------------------------------------------------------------------------------------------------------------------------------------------------------------------------------------------------------------------------------------|--------------------|------|---------|----------|------|-------|-------|-------|-------|-------|-------|------|------|------|------|------|------|------|------|-------|--------|--------|--------|--------|
| Heterogeneous nuclear ribonucleoprotein Q2<br>OS=Homo sapiens<br>GN=SYNCRIP PE=1<br>SV=2 | 6 HNRPQ_HUMAN,sp Q7TMK9 HNRPQ_MOUSE,trans A7E355 A7E355_BOVIN,trans B2R8Z8 B2R8Z8_HUMAN,trans B7Z645 B7Z645_HUMAN,trans D2HLE8 D2HLE8_AILME,trans D3ZF34 D3ZF34_RAT,trans D3ZME6 D3ZME6_RAT,trans E2QVD2 E2QVD2_CANFA,trans E2QVD3 E2QVD3 | dLFE<br>DELV<br>PLFE<br>k                                                                                                                                                                                                                 | 92%                | 48.6 | 54.2565 | Ref      | 0.19 | -0.16 | -0.09 | -0.39 | -0.25 | -0.05 | 0.23  | 616  | 608  | 516  | 610  | 544  | 524  | 629  | 756  | 734.7 | 2201.2 | 3      | 0.0177 | 8.029  |
|                                                                                          | Heterogeneous nuclear ribonucleoprotein Q2<br>OS=Homo sapiens<br>GN=SYNCRIP PE=1<br>SV=2                                                                                                                                                  | 6 HNRPQ_HUMAN,sp Q7TMK9 HNRPQ_MOUSE,trans A7E355 A7E355_BOVIN,trans B2R8Z8 B2R8Z8_HUMAN,trans B7Z645 B7Z645_HUMAN,trans D2HLE8 D2HLE8_AILME,trans D3ZF34 D3ZF34_RAT,trans D3ZME6 D3ZME6_RAT,trans E2QVD2 E2QVD2_CANFA,trans E2QVD3 E2QVD3 | gYAF<br>VTfc<br>Tk | 50%  | 32.4    | 52.95525 | Ref  | 0.31  | -0.3  | -0.09 | -0.29 | -0.13 | -0.15 | 0.17 | 2230 | 2420 | 1720 | 2240 | 2140 | 2090 | 2150 | 2670  | 597.6  | 1789.9 | 3      | 0.0108 |

|                                                                                         |                                                                                                                                                                                                                                           |                                                                                                                                                                                                                                           |              |      |          |          |      |       |       |       |        |       |       |       |       |       |       |       |       |       |       |       |        |        |        |        |
|-----------------------------------------------------------------------------------------|-------------------------------------------------------------------------------------------------------------------------------------------------------------------------------------------------------------------------------------------|-------------------------------------------------------------------------------------------------------------------------------------------------------------------------------------------------------------------------------------------|--------------|------|----------|----------|------|-------|-------|-------|--------|-------|-------|-------|-------|-------|-------|-------|-------|-------|-------|-------|--------|--------|--------|--------|
| Heterogeneous nuclear ribonucleoprotein Q<br>OS=Homo sapiens<br>GN=SYNCRIP PE=1<br>SV=2 | 6 HNRPQ_HUMAN,sp Q7TMK9 HNRPQ_MOUSE,trans A7E355 A7E355_BOVIN,trans B2R8Z8 B2R8Z8_HUMAN,trans B7Z645 B7Z645_HUMAN,trans D2HLE8 D2HLE8_AILME,trans D3ZF34 D3ZF34_RAT,trans D3ZME6 D3ZME6_RAT,trans E2QVD2 E2QVD2_CANFA,trans E2QVD3 E2QVD3 | lkDYAFIH                                                                                                                                                                                                                                  | 85%          | 40.7 | 54.23929 | Ref      | 0.11 | -0.26 | 0.088 | -0.14 | -0.07  | -0.04 | 0.049 | 3060  | 3220  | 2700  | 3870  | 3640  | 3340  | 3560  | 3750  | 541.3 | 2161.2 | 4      | 0.0094 | 4.347  |
|                                                                                         | Heterogeneous nuclear ribonucleoprotein Q<br>OS=Homo sapiens<br>GN=SYNCRIP PE=1<br>SV=2                                                                                                                                                   | 6 HNRPQ_HUMAN,sp Q7TMK9 HNRPQ_MOUSE,trans A7E355 A7E355_BOVIN,trans B2R8Z8 B2R8Z8_HUMAN,trans B7Z645 B7Z645_HUMAN,trans D2HLE8 D2HLE8_AILME,trans D3ZF34 D3ZF34_RAT,trans D3ZME6 D3ZME6_RAT,trans E2QVD2 E2QVD2_CANFA,trans E2QVD3 E2QVD3 | tGYTLDVTTGQR | 79%  | 37.4     | 52.29823 | Ref  | 0.096 | -0.16 | 0.093 | -0.096 | -0    | -0.24 | -0.14 | 23900 | 21800 | 19900 | 26500 | 25700 | 23900 | 21200 | 22500 | 808.4  | 1614.8 | 2      | 0.0152 |

|                                                                              |                        |                                       |     |      |          |     |        |       |       |        |       |       |       |       |       |       |        |        |       |       |        |       |        |   |        |       |
|------------------------------------------------------------------------------|------------------------|---------------------------------------|-----|------|----------|-----|--------|-------|-------|--------|-------|-------|-------|-------|-------|-------|--------|--------|-------|-------|--------|-------|--------|---|--------|-------|
| Uncharacterized protein<br>OS=Ornithorhynchus anatinus<br>GN=AHNAK PE=4 SV=1 | tr F7FUG3 F7FUG3_ORNAN | aDID<br>VSG<br>Pk                     | 93% | 44.2 | 51.98503 | Ref | -0.59  | -0.28 | -0.11 | 0.096  | 0.053 | -0.71 | -0.26 | 2E+05 | 82600 | 1E+05 | 141000 | 178000 | 2E+05 | 92800 | 126000 | 755.4 | 1508.9 | 2 | 0.0151 | 10.01 |
| Uncharacterized protein<br>OS=Ornithorhynchus anatinus<br>GN=AHNAK PE=4 SV=1 | tr F7FUG3 F7FUG3_ORNAN | gDID<br>ISGP<br>k                     | 95% | 54.2 | 51.8443  | Ref | -0.74  | -0.14 | -0.12 | -0.014 | 0.12  | -0.45 | -0.38 | 63600 | 30700 | 50200 | 57400  | 68000  | 65100 | 45800 | 47900  | 504   | 1508.9 | 3 | 0.0139 | 9.207 |
| Uncharacterized protein<br>OS=Ornithorhynchus anatinus<br>GN=AHNAK PE=4 SV=1 | tr F7FUG3 F7FUG3_ORNAN | iSMP<br>DIDL<br>NLkG<br>Pk            | 66% | 31.4 | 50.98433 | Ref | -0.75  | -0.31 | -0.11 | 0.13   | 0.054 | -0.37 | -0.1  | 13800 | 7750  | 11400 | 14800  | 19100  | 15900 | 12300 | 14800  | 614.1 | 2452.4 | 4 | 0.0072 | 2.934 |
| Uncharacterized protein<br>OS=Ornithorhynchus anatinus<br>GN=AHNAK PE=4 SV=1 | tr F7FUG3 F7FUG3_ORNAN | iSMP<br>DIDL<br>nLkG<br>Pk            | 55% | 30.5 | 52.07734 | Ref | -0.48  | -0.42 | -0.3  | -0.011 | 0.17  | -0.21 | -0.07 | 3520  | 2540  | 2870  | 3490   | 4700   | 4670  | 3740  | 4090   | 614.4 | 2453.4 | 4 | 0.0167 | 6.816 |
| CD93 OS=Ovis aries<br>GN=CD93 PE=2 SV=1                                      | tr C5ISB5 C5ISB5_SHEEP | kQQ<br>PQS<br>AAD<br>SYA<br>WVP<br>ER | 90% | 47   | 55.00445 | Ref | -0.023 | -0.61 | 0.6   | 0.2    | 0.37  | -0.66 | 0.6   | 3890  | 3140  | 2260  | 5910   | 4920   | 4820  | 2470  | 5860   | 857.1 | 2568.3 | 3 | 0.0236 | 9.17  |
| CD93 OS=Ovis aries<br>GN=CD93 PE=2 SV=1                                      | tr C5ISB5 C5ISB5_SHEEP | ILDD<br>LVSc<br>ASR                   | 95% | 48.5 | 51.78873 | Ref | -0.092 | -1.1  | 0.59  | 0.17   | 0.55  | -1.5  | 0.88  | 1960  | 1430  | 754   | 2800   | 2300   | 2620  | 669   | 3410   | 771.4 | 1540.8 | 2 | 0.0082 | 5.29  |

|                                                                       |                                                                                                                                                                                                                                                                                                                         |                                 |     |      |          |     |      |       |       |        |       |       |       |       |       |       |        |       |       |       |       |       |        |   |        |       |
|-----------------------------------------------------------------------|-------------------------------------------------------------------------------------------------------------------------------------------------------------------------------------------------------------------------------------------------------------------------------------------------------------------------|---------------------------------|-----|------|----------|-----|------|-------|-------|--------|-------|-------|-------|-------|-------|-------|--------|-------|-------|-------|-------|-------|--------|---|--------|-------|
| CD93 OS=Ovis aries<br>GN=CD93 PE=2<br>SV=1                            | tr C5ISB5<br> C5ISB5_<br>SHEEP                                                                                                                                                                                                                                                                                          | rPSL<br>PAR                     | 61% | 29.7 | 48.48663 | Ref | 0.23 | 0.3   | 0.42  | -0.068 | 0.47  | -0.8  | 0.36  | 10100 | 12000 | 13600 | 16600  | 13000 | 16500 | 7170  | 15800 | 367.6 | 1099.7 | 3 | 0.0156 | 14.15 |
| CD93 OS=Ovis aries<br>GN=CD93 PE=2<br>SV=1                            | tr C5ISB5<br> C5ISB5_<br>SHEEP                                                                                                                                                                                                                                                                                          | rPSL<br>PAR                     | 74% | 31.7 | 47.2863  | Ref | 0.1  | -0.16 | 0.63  | 0.028  | 0.43  | -0.81 | 0.5   | 58000 | 57700 | 52000 | 101000 | 73500 | 84500 | 37500 | 92500 | 367.6 | 1099.7 | 3 | 0.0078 | 7.086 |
| Tubulin beta-2C<br>chain OS=Homo<br>sapiens<br>GN=TUBB2C PE=1<br>SV=1 | 1 TBB2C_<br>HUMAN,s<br>p P68372<br> TBB2C_<br>MOUSE,s<br>p Q3MH<br>M5 TBB2<br>C_BOVIN,<br>sp Q6P9T<br>8 TBB2C_<br>RAT,tr E2<br>QWZ6 E2<br>QWZ6_CA<br>NFA,tr F2<br>Z571 F2Z<br>571_PIG,t<br>r F6WYK8<br> F6WYK8<br>_MONDO,<br>tr F7GW5<br>7 F7GW5<br>7_MACM<br>U,tr Q604<br>55 Q6045<br>5_CRIGR,t<br>r Q8IWP6<br> Q8IWP6 | aLTV<br>PELT<br>QQ<br>MFD<br>Ak | 89% | 45.3 | 54.16206 | Ref | 0.18 | -0.42 | -0.07 | -0.23  | -0.17 | -0.1  | -0.15 | 1740  | 1640  | 1170  | 1670   | 1660  | 1500  | 1650  | 1580  | 767.4 | 2299.3 | 3 | 0.0143 | 6.202 |

|                                                                       |                                                                                                                                                                                                                                           |                                 |     |      |          |     |      |       |       |        |       |       |       |      |      |      |      |      |      |      |      |       |      |   |        |       |
|-----------------------------------------------------------------------|-------------------------------------------------------------------------------------------------------------------------------------------------------------------------------------------------------------------------------------------|---------------------------------|-----|------|----------|-----|------|-------|-------|--------|-------|-------|-------|------|------|------|------|------|------|------|------|-------|------|---|--------|-------|
| Tubulin beta-2C<br>chain OS=Homo<br>sapiens<br>GN=TUBB2C PE=1<br>SV=1 | 1 TBB2C_ HUMAN,s p P68372  TBB2C_ MOUSE,s p Q3MH M5 TBB2 C_BOVIN, sp Q6P9T 8 TBB2C_ RAT,tr E2 QWZ6 E2 QWZ6_CA NFA,tr F2 Z571 F2Z 571_PIG,t r F6WYK8  F6WYK8 _MONDO, tr F7GW5 7 F7GW5 7_MACM U,tr Q604 55 Q6045 5_CRIGR,t r Q8IWP6  Q8IWP6 | aVLV<br>DLEP<br>GTM<br>DSV<br>R | 89% | 42.8 | 53.53655 | Ref | 0.16 | -0.42 | 0.006 | -0.11  | 0.023 | -0.51 | -0.11 | 3660 | 3500 | 2530 | 3820 | 3890 | 3720 | 2690 | 3510 | 953.5 | 1905 | 2 | 0.0115 | 6.012 |
| Tubulin beta-2C<br>chain OS=Homo<br>sapiens<br>GN=TUBB2C PE=1<br>SV=1 | 1 TBB2C_ HUMAN,s p P68372  TBB2C_ MOUSE,s p Q3MH M5 TBB2 C_BOVIN, sp Q6P9T 8 TBB2C_ RAT,tr E2 QWZ6 E2 QWZ6_CA NFA,tr F2 Z571 F2Z 571_PIG,t r F6WYK8  F6WYK8 _MONDO, tr F7GW5 7 F7GW5 7_MACM U,tr Q604 55 Q6045 5_CRIGR,t r Q8IWP6  Q8IWP6 | aVLV<br>DLEP<br>GTM<br>DSV<br>R | 88% | 42.2 | 53.56204 | Ref | 0.19 | -0.4  | -0.07 | -0.043 | -0.02 | -0.55 | 0.021 | 3320 | 3450 | 2480 | 3520 | 3940 | 3500 | 2530 | 3730 | 953.5 | 1905 | 2 | 0.0041 | 2.161 |

|                                                             |                                                                                                                                                                                                                 |                  |     |      |          |     |        |       |       |       |       |       |       |       |       |       |       |       |       |       |       |       |        |   |        |       |
|-------------------------------------------------------------|-----------------------------------------------------------------------------------------------------------------------------------------------------------------------------------------------------------------|------------------|-----|------|----------|-----|--------|-------|-------|-------|-------|-------|-------|-------|-------|-------|-------|-------|-------|-------|-------|-------|--------|---|--------|-------|
| Tubulin beta-2C chain OS=Homo sapiens GN=TUBB2C PE=1 SV=1   | 1 TBB2C_HUMAN,sp P68372 TBB2C_MOUSE,sp Q3MHM5 TBB2C_BOVIN,sp Q6P9T8 TBB2C_RAT,tr E2QWZ6 E2QWZ6_CANFA,tr F2Z571 F2Z571_PIG,tr F6WYK8 F6WYK8_MONDO,tr F7GW57 F7GW57_MACMU,tr Q60455 Q60455_CRIGR,tr Q8IWP6 Q8IWP6 | iINVY YNE ATG Gk | 87% | 43.6 | 53.78109 | Ref | -0.2   | -0.3  | 0.018 | -0.1  | 0.15  | -0.39 | -0.04 | 14800 | 11400 | 11600 | 16100 | 16300 | 16900 | 12200 | 15500 | 646.4 | 1936   | 3 | 0.0101 | 5.226 |
| Uncharacterized protein OS=Bos taurus GN=Bt.45504 PE=4 SV=1 | tr E1B7W1 E1B7W1_BOVIN                                                                                                                                                                                          | eEST TGF Dk      | 88% | 41   | 52.11905 | Ref | -0.14  | 0.019 | -0.26 | -0.39 | -0.22 | -0.37 | -0.14 | 17900 | 13400 | 16300 | 15100 | 15200 | 14800 | 14000 | 16300 | 811.4 | 1620.8 | 2 | 0.0136 | 8.415 |
| Uncharacterized protein OS=Bos taurus GN=Bt.45504 PE=4 SV=1 | tr E1B7W1 E1B7W1_BOVIN                                                                                                                                                                                          | eSEF DDE Pk      | 57% | 31.1 | 50.90353 | Ref | -0.18  | -0.02 | -0.5  | -0.33 | 0.11  | -0.65 | 0.19  | 12100 | 10500 | 12700 | 10300 | 12700 | 15000 | 9280  | 16400 | 852.4 | 1702.8 | 2 | 0.0239 | 14.03 |
| Uncharacterized protein OS=Bos taurus GN=Bt.45504 PE=4 SV=1 | tr E1B7W1 E1B7W1_BOVIN                                                                                                                                                                                          | gSEQ EAAK        | 79% | 37.1 | 52.20247 | Ref | -0.027 | -0.15 | -0.34 | -0.43 | -0.03 | -0.52 | -0.08 | 10800 | 8600  | 8590  | 8440  | 8740  | 10100 | 7450  | 10100 | 714.4 | 1426.8 | 2 | 0.0132 | 9.22  |

|                                                                                |                                                                                              |                                             |     |      |          |     |        |       |       |       |       |       |       |       |       |       |       |       |       |       |       |       |        |   |        |       |
|--------------------------------------------------------------------------------|----------------------------------------------------------------------------------------------|---------------------------------------------|-----|------|----------|-----|--------|-------|-------|-------|-------|-------|-------|-------|-------|-------|-------|-------|-------|-------|-------|-------|--------|---|--------|-------|
| Uncharacterized protein OS=Bos taurus GN=Bt.45504 PE=4 SV=1                    | tr E1B7W1 E1B7W1_BOVIN                                                                       | kTEE<br>LEEE<br>SFSE<br>R                   | 79% | 39.7 | 53.74013 | Ref | -0.044 | -0.35 | -0.46 | -0.43 | 0.056 | -0.35 | 0.15  | 24200 | 21500 | 18900 | 19500 | 22100 | 27000 | 21300 | 29900 | 741   | 2220.1 | 3 | 0.0207 | 9.314 |
| Splicing factor, proline- and glutamine-rich OS=Homo sapiens GN=SFPQ PE=1 SV=2 | sp P23246 SFPQ_HUMAN, tr E1BQ37 E1BQ37_BOVIN, tr Q86VG2 Q86VG2_HUMAN, tr Q9BSV4 Q9BSV4_HUMAN | fATH<br>AAA<br>LSVR                         | 70% | 35.2 | 52.06886 | Ref | -0.01  | -0.07 | -0.14 | -0.26 | -0.11 | -0.15 | -0.09 | 11100 | 10600 | 11100 | 11800 | 12000 | 11700 | 11800 | 12200 | 483.3 | 1446.8 | 3 | 0.0084 | 5.787 |
| Splicing factor, proline- and glutamine-rich OS=Homo sapiens GN=SFPQ PE=1 SV=2 | sp P23246 SFPQ_HUMAN, tr E1BQ37 E1BQ37_BOVIN, tr Q86VG2 Q86VG2_HUMAN, tr Q9BSV4 Q9BSV4_HUMAN | mGG<br>GGA<br>MN<br>MGD<br>PYGS<br>GGQ<br>k | 80% | 38   | 51.56419 | Ref | -0.01  | -0.08 | -0.46 | -0.37 | 0.029 | -0.36 | 0.071 | 5220  | 4250  | 4390  | 3790  | 4460  | 5110  | 4070  | 5460  | 794   | 2379.1 | 3 | 0.0211 | 8.845 |
| Splicing factor, proline- and glutamine-rich OS=Homo sapiens GN=SFPQ PE=1 SV=2 | sp P23246 SFPQ_HUMAN, tr E1BQ37 E1BQ37_BOVIN, tr Q86VG2 Q86VG2_HUMAN, tr Q9BSV4 Q9BSV4_HUMAN | qGP<br>GPG<br>GPK                           | 79% | 37.5 | 51.58398 | Ref | -0.17  | 0.11  | -0.55 | -0.25 | -0.02 | -0.29 | 0.075 | 24400 | 18900 | 24900 | 17600 | 23900 | 24600 | 21300 | 27200 | 468.3 | 1401.8 | 3 | 0.0234 | 16.66 |

|                                                                         |                                    |                                           |     |      |          |     |        |       |       |        |       |       |       |       |       |       |       |       |       |       |       |       |        |   |        |       |
|-------------------------------------------------------------------------|------------------------------------|-------------------------------------------|-----|------|----------|-----|--------|-------|-------|--------|-------|-------|-------|-------|-------|-------|-------|-------|-------|-------|-------|-------|--------|---|--------|-------|
| Actin-like protein<br>(Fragment)<br>OS=Homo sapiens<br>GN=ACT PE=2 SV=1 | tr Q562M<br>3 Q562M<br>3_HUMA<br>N | vAPE<br>EHP<br>VLLT<br>QAP<br>LNPk        | 63% | 35   | 53.29711 | Ref | 0.24   | -0.05 | -0.1  | 0.13   | 0.013 | -0.04 | -0.05 | 15200 | 17400 | 15400 | 16700 | 21600 | 17400 | 17600 | 17300 | 854.5 | 2560.4 | 3 | 0.0349 | 13.62 |
| Actin-like protein<br>(Fragment)<br>OS=Homo sapiens<br>GN=ACT PE=2 SV=1 | tr Q562M<br>3 Q562M<br>3_HUMA<br>N | vAPE<br>EHP<br>VLLT<br>qAPL<br>NPK        | 72% | 36.4 | 52.74303 | Ref | 0.025  | -0.06 | -0.06 | -0.047 | -0.09 | 0.22  | -0.43 | 29200 | 20300 | 20800 | 23200 | 25900 | 21900 | 28300 | 18000 | 854.8 | 2561.5 | 3 | 0.005  | 1.946 |
| Actin-like protein<br>(Fragment)<br>OS=Homo sapiens<br>GN=ACT PE=2 SV=1 | tr Q562M<br>3 Q562M<br>3_HUMA<br>N | vAPE<br>EHP<br>VLLT<br>qAPL<br>NPK        | 95% | 70.1 | 53.32305 | Ref | -0.012 | 0.032 | -0.02 | 0.051  | -0.05 | 0.22  | -0.28 | 2420  | 2020  | 2260  | 2450  | 2830  | 2310  | 2900  | 2030  | 1282  | 2561.4 | 2 | 0.0197 | 7.704 |
| Actin-like protein<br>(Fragment)<br>OS=Homo sapiens<br>GN=ACT PE=2 SV=1 | tr Q562M<br>3 Q562M<br>3_HUMA<br>N | vAPE<br>EHP<br>VLLT<br>qAPL<br>NPK<br>ANR | 95% | 53.2 | 54.19093 | Ref | 0.24   | -0.19 | -0.06 | 0.068  | -0.15 | 0.19  | -0.09 | 5450  | 5800  | 4670  | 5730  | 6900  | 5170  | 6860  | 5600  | 650.6 | 2598.4 | 4 | 0.0162 | 6.241 |



|                                                                 |                                                                                                                                                                       |                    |     |      |          |     |        |       |       |        |       |       |       |       |      |       |       |       |       |       |       |       |        |   |        |       |
|-----------------------------------------------------------------|-----------------------------------------------------------------------------------------------------------------------------------------------------------------------|--------------------|-----|------|----------|-----|--------|-------|-------|--------|-------|-------|-------|-------|------|-------|-------|-------|-------|-------|-------|-------|--------|---|--------|-------|
| 40S ribosomal protein S5 OS=Rattus norvegicus GN=Rps5 PE=2 SV=3 | 0 RS5_RA T,sp P46782 RS5_HUMAN,sp P97461 RS5_MOUSE,sp Q5E988 RS5_BOVIN,tr B0BN81 B0BN81_RAT,tr D2HWG8 D2HWG8_AILME,tr E2RIQ8 E2RIQ8_CAF6R6P5 F6R6P5_ORNAN,tr F6T2T8 F | gSSn SYAI          | 84% | 39.3 | 52.69487 | Ref | -0.2   | 0.018 | 0.086 | -0.046 | 0.17  | -0.16 | -0.14 | 11800 | 8580 | 10800 | 12700 | 12800 | 13000 | 10800 | 10900 | 768.4 | 1534.8 | 2 | 0.0138 | 8.97  |
| 40S ribosomal protein S5 OS=Rattus norvegicus GN=Rps5 PE=2 SV=3 | 0 RS5_RA T,sp P46782 RS5_HUMAN,sp P97461 RS5_MOUSE,sp Q5E988 RS5_BOVIN,tr B0BN81 B0BN81_RAT,tr D2HWG8 D2HWG8_AILME,tr E2RIQ8 E2RIQ8_CAF6R6P5 F6R6P5_ORNAN,tr F6T2T8 F | rVN QAI WLLc TGA R | 73% | 37.8 | 53.81844 | Ref | -0.026 | -0.05 | -0.04 | -0.025 | -0.08 | -0    | 0.1   | 370   | 331  | 353   | 398   | 444   | 375   | 411   | 439   | 651   | 1950.1 | 3 | 0.0067 | 3.411 |

|                                                                 |                                                                                                                                                                                                                          |                  |     |      |          |     |       |       |       |        |       |       |      |     |     |     |     |     |     |     |     |     |        |   |        |       |
|-----------------------------------------------------------------|--------------------------------------------------------------------------------------------------------------------------------------------------------------------------------------------------------------------------|------------------|-----|------|----------|-----|-------|-------|-------|--------|-------|-------|------|-----|-----|-----|-----|-----|-----|-----|-----|-----|--------|---|--------|-------|
| 40S ribosomal protein S5 OS=Rattus norvegicus GN=Rps5 PE=2 SV=3 | 0 RS5_RA T,sp P46782 RS5_HUMAN,sp P97461 RS5_MOUSE,sp Q5E988 RS5_BOVIN,tr B0BN81 B0BN81_RAT,tr D2HWG8 D2HWG8_AILME,tr E2RIQ8 E2RIQ8_CAFNA,tr F2X205 F2X205_AILME,tr F2Z5E6 F2Z5E6_PIG,tr F6R6P5 F6R6P5_ORNAN,tr F6T2T8 F | vNQ AIWL LcTG AR | 94% | 47   | 53.27723 | Ref | -0.18 | -0.14 | 0.081 | -0.017 | -0.05 | -0.1  | 0.12 | 779 | 570 | 634 | 830 | 855 | 730 | 736 | 850 | 898 | 1794   | 2 | 0.0082 | 4.548 |
| 40S ribosomal protein S5 OS=Rattus norvegicus GN=Rps5 PE=2 SV=3 | 0 RS5_RA T,sp P46782 RS5_HUMAN,sp P97461 RS5_MOUSE,sp Q5E988 RS5_BOVIN,tr B0BN81 B0BN81_RAT,tr D2HWG8 D2HWG8_AILME,tr E2RIQ8 E2RIQ8_CAFNA,tr F2X205 F2X205_AILME,tr F2Z5E6 F2Z5E6_PIG,tr F6R6P5 F6R6P5_ORNAN,tr F6T2T8 F | vNQ AIWL LcTG AR | 69% | 35.6 | 53.20821 | Ref | -0.19 | -0.24 | 0.11  | -0.11  | 0.073 | 0.082 | 0.1  | 481 | 379 | 398 | 568 | 540 | 534 | 561 | 565 | 898 | 1793.9 | 2 | 0.0101 | 5.629 |

|                                                                       |                                             |                |     |      |          |     |       |       |       |        |       |                            |       |       |       |       |       |       |      |                            |       |       |        |   |        |       |
|-----------------------------------------------------------------------|---------------------------------------------|----------------|-----|------|----------|-----|-------|-------|-------|--------|-------|----------------------------|-------|-------|-------|-------|-------|-------|------|----------------------------|-------|-------|--------|---|--------|-------|
| Plasminogen activator inhibitor 1 OS=Bos taurus GN=SERPINE1 PE=1 SV=1 | sp P13909 PAI1_BOVIN, tr D4N532 D4N532_SHEP | ILVLPk         | 94% | 26.1 | 28.77371 | Ref | 0.3   | -0.11 | 0.59  | -0.38  | -0.35 | -0.39                      | 0.18  | 1460  | 2070  | 1690  | 3080  | 1730  | 1550 | 1570                       | 2320  | 431   | 1289.9 | 3 | 0.0029 | 2.268 |
| Plasminogen activator inhibitor 1 OS=Bos taurus GN=SERPINE1 PE=1 SV=1 | sp P13909 PAI1_BOVIN, tr D4N532 D4N532_SHEP | ILVLPk         | 85% | 17.6 | 28.77371 | Ref | 0.5   | -0.06 | 0.56  | -0.5   | -0.37 | Value Missing (-2.1243453) | 0.13  | 2750  | 2780  | 2050  | 3540  | 1870  | 1790 | Value Missing (-2.1243453) | 2620  | 431   | 1289.9 | 3 | 0.0036 | 2.756 |
| Plasminogen activator inhibitor 1 OS=Bos taurus GN=SERPINE1 PE=1 SV=1 | sp P13909 PAI1_BOVIN, tr D4N532 D4N532_SHEP | qQIQEAMQFk     | 95% | 51.8 | 51.39892 | Ref | 0.43  | -0.3  | 0.18  | -0.38  | -0.16 | -0.3                       | 0.096 | 578   | 663   | 433   | 676   | 508   | 514  | 488                        | 638   | 769.4 | 1536.8 | 2 | 0.0144 | 9.355 |
| Plasminogen activator inhibitor 1 OS=Bos taurus GN=SERPINE1 PE=1 SV=1 | sp P13909 PAI1_BOVIN, tr D4N532 D4N532_SHEP | qQIQEAMQFk     | 59% | 34.4 | 53.53605 | Ref | 0.2   | -0.18 | 0.32  | -0.29  | -0.05 | -0.23                      | -0.04 | 6450  | 6590  | 5510  | 8700  | 6320  | 6480 | 5990                       | 6770  | 620.3 | 1858   | 3 | 0.0105 | 5.64  |
| Uncharacterized protein OS=Sus scrofa GN=PDLM5 PE=4 SV=1              | tr F1RW4 F1RWW4_PIG                         | gQPQPSnEDTLVQR | 95% | 54.7 | 52.54768 | Ref | -0.38 | 0.29  | -0.71 | -0.057 | -0.86 | 0.22                       | -0.7  | 13900 | 10300 | 17800 | 10000 | 17300 | 8650 | 19200                      | 10100 | 937.5 | 1872.9 | 2 | 0.0115 | 6.111 |

|                                                                                                 |                                                                                                                                                                    |                      |     |      |          |     |       |      |       |        |       |       |       |       |       |       |       |       |       |       |       |       |        |   |        |       |
|-------------------------------------------------------------------------------------------------|--------------------------------------------------------------------------------------------------------------------------------------------------------------------|----------------------|-----|------|----------|-----|-------|------|-------|--------|-------|-------|-------|-------|-------|-------|-------|-------|-------|-------|-------|-------|--------|---|--------|-------|
| Uncharacterized protein OS=Sus scrofa GN=PDLIM5 PE=4 SV=1                                       | tr F1RW<br>W4 F1R<br>WW4_PIG                                                                                                                                       | iLAQI<br>TGTE<br>HLK | 91% | 43.8 | 50.73454 | Ref | -0.38 | 0.1  | -0.55 | -0.087 | -0.6  | -0.03 | -0.54 | 6340  | 4230  | 6420  | 4560  | 6950  | 4260  | 6610  | 4590  | 644.7 | 1931.2 | 3 | 0.015  | 7.762 |
| Uncharacterized protein OS=Sus scrofa GN=PDLIM5 PE=4 SV=1                                       | tr F1RW<br>W4 F1R<br>WW4_PIG                                                                                                                                       | iLAQI<br>TGTE<br>HLK | 77% | 35.9 | 50.74663 | Ref | -0.51 | 0.06 | -0.46 | -0.12  | -0.56 | 0.077 | -0.63 | 3720  | 2210  | 3560  | 2780  | 3870  | 2500  | 4060  | 2470  | 644.7 | 1931.2 | 3 | 0.0137 | 7.095 |
| Uncharacterized protein OS=Sus scrofa GN=PDLIM5 PE=4 SV=1                                       | tr F1RW<br>W4 F1R<br>WW4_PIG                                                                                                                                       | iLAQI<br>TGTE<br>HLK | 94% | 44.6 | 50.16369 | Ref | -0.37 | 0.09 | -0.59 | -0.17  | -0.47 | -0.06 | -0.44 | 1800  | 1210  | 1810  | 1270  | 1870  | 1330  | 1840  | 1410  | 483.8 | 1931.2 | 4 | 0.0055 | 2.838 |
| Acidic leucine-rich nuclear phosphoprotein 32 family member A OS=Bos taurus GN=ANP32A PE=1 SV=2 | sp P5112<br>2 AN32A<br>_BOVIN,s<br>p Q8HY6<br>7 AN32A<br>_CANFA,tr<br> F1PQ43 <br>F1PQ43_C<br>ANFA,tr F<br>1SIU2 F1<br>SIU2_PIG,<br>tr F7BTD<br>7 F7BTD7<br>_MONDO | eLVL<br>DNc<br>R     | 71% | 32.9 | 50.01448 | Ref | -0.28 | 0.16 | 0.14  | 0.11   | 0.41  | -0.05 | 0.2   | 33400 | 25200 | 37100 | 40900 | 44400 | 47600 | 36100 | 42700 | 656.3 | 1310.7 | 2 | 0.0106 | 8.072 |

|                                                                                                 |                                                                                                                 |                     |     |      |          |     |        |      |                            |        |      |       |       |      |      |       |                             |      |      |      |      |       |        |   |        |       |
|-------------------------------------------------------------------------------------------------|-----------------------------------------------------------------------------------------------------------------|---------------------|-----|------|----------|-----|--------|------|----------------------------|--------|------|-------|-------|------|------|-------|-----------------------------|------|------|------|------|-------|--------|---|--------|-------|
| Acidic leucine-rich nuclear phosphoprotein 32 family member A OS=Bos taurus GN=ANP32A PE=1 SV=2 | sp P51122 AN32A_BOVIN,sp Q8HY67 AN32A_CANFA,tr F1PQ43 F1PQ43_CANFA,tr F1SIU2 F1SIU2_PIG, tr F7BTD7 F7BTD7_MONDO | iSGG<br>LEVL<br>AEk | 91% | 43.7 | 51.02029 | Ref | -0.049 | 0.27 | 0.01                       | 0.23   | 0.23 | 0.056 | -0.03 | 4950 | 4240 | 5740  | 5370                        | 6880 | 6020 | 5580 | 5220 | 575.3 | 1723   | 3 | 0.0085 | 4.953 |
| Acidic leucine-rich nuclear phosphoprotein 32 family member A OS=Bos taurus GN=ANP32A PE=1 SV=2 | sp P51122 AN32A_BOVIN,sp Q8HY67 AN32A_CANFA,tr F1PQ43 F1PQ43_CANFA,tr F1SIU2 F1SIU2_PIG, tr F7BTD7 F7BTD7_MONDO | rIHLE<br>LR         | 85% | 38.5 | 52.02235 | Ref | 0.24   | 0.8  | )                          | -0.073 | 0.54 | -0.55 | -0.02 | 5020 | 5050 | 8110  | Value Missing (-0.95963204) | 5470 | 7280 | 3570 | 5120 | 310.9 | 1239.8 | 4 | 0.0116 | 9.338 |
| Acidic leucine-rich nuclear phosphoprotein 32 family member A OS=Bos taurus GN=ANP32A PE=1 SV=2 | sp P51122 AN32A_BOVIN,sp Q8HY67 AN32A_CANFA,tr F1PQ43 F1PQ43_CANFA,tr F1SIU2 F1SIU2_PIG, tr F7BTD7 F7BTD7_MONDO | rIHLE<br>LR         | 85% | 38.3 | 51.95163 | Ref | 0.17   | 0.91 | Value Missing (-0.7684114) | -0.16  | 0.41 | -0.5  | -0.05 | 6730 | 6410 | 11600 | Value Missing (-0.7684114)  | 6840 | 8870 | 4910 | 6680 | 310.9 | 1239.8 | 4 | 0.0091 | 7.372 |

|                                                                         |                                                                                                                                                                                                                                                                                                                         |                           |     |      |          |     |      |       |       |       |       |       |       |       |       |      |       |       |       |       |       |       |        |   |        |       |
|-------------------------------------------------------------------------|-------------------------------------------------------------------------------------------------------------------------------------------------------------------------------------------------------------------------------------------------------------------------------------------------------------------------|---------------------------|-----|------|----------|-----|------|-------|-------|-------|-------|-------|-------|-------|-------|------|-------|-------|-------|-------|-------|-------|--------|---|--------|-------|
| 60S ribosomal protein L10a<br>OS=Mus musculus<br>GN=Rpl10a PE=1<br>SV=3 | 6 RL10A_MOUSE,s<br>p P62906<br> RL10A_H<br>UMAN,sp<br> P62907 <br>RL10A_RA<br>T,sp Q4R<br>5P3 RL10<br>A_MACFA<br>,sp Q5E9<br>E6 RL10A<br>_BOVIN,tr<br> A1XQU2<br> A1XQU2<br>_PIG,tr D<br>2GYW8 D<br>2GYW8_A<br>ILME,tr E<br>2R9V0 E2<br>R9V0_CA<br>NFA,tr F1<br>M8D2 F1<br>M8D2_RA<br>T,tr F1RY<br>Z5 F1RYZ<br>5_PIG,tr | aVDI<br>PHM<br>DIEA<br>Lk | 73% | 37.7 | 53.81878 | Ref | 0.33 | -0.15 | -0.08 | -0.47 | -0.29 | -0.28 | -0.39 | 4820  | 6110  | 4730 | 5610  | 4710  | 4650  | 4900  | 4490  | 687.4 | 2059.1 | 3 | 0.0167 | 8.107 |
| 60S ribosomal protein L10a<br>OS=Mus musculus<br>GN=Rpl10a PE=1<br>SV=3 | 6 RL10A_MOUSE,s<br>p P62906<br> RL10A_H<br>UMAN,sp<br> P62907 <br>RL10A_RA<br>T,sp Q4R<br>5P3 RL10<br>A_MACFA<br>,sp Q5E9<br>E6 RL10A<br>_BOVIN,tr<br> A1XQU2<br> A1XQU2<br>_PIG,tr D<br>2GYW8 D<br>2GYW8_A<br>ILME,tr E<br>2R9V0 E2<br>R9V0_CA<br>NFA,tr F1<br>M8D2 F1<br>M8D2_RA<br>T,tr F1RY<br>Z5 F1RYZ<br>5_PIG,tr | iLGP<br>GLNk              | 65% | 27   | 44.97192 | Ref | 0.22 | -0.59 | 0.18  | -0.33 | -0.28 | -0.37 | -0.36 | 13200 | 13800 | 8580 | 16300 | 12700 | 11400 | 11200 | 11200 | 474   | 1418.9 | 3 | 0.0046 | 3.223 |

|                                                                         |                                                                                                                                                                                                                                                                                     |    |     |      |          |     |        |       |       |       |       |       |       |      |      |      |      |      |      |      |      |       |        |   |       |       |
|-------------------------------------------------------------------------|-------------------------------------------------------------------------------------------------------------------------------------------------------------------------------------------------------------------------------------------------------------------------------------|----|-----|------|----------|-----|--------|-------|-------|-------|-------|-------|-------|------|------|------|------|------|------|------|------|-------|--------|---|-------|-------|
| 60S ribosomal protein L10a<br>OS=Mus musculus<br>GN=Rpl10a PE=1<br>SV=3 | 6 RL10A_MOUSE,s<br>p P62906<br> RL10A_HUMAN,sp<br> P62907 <br>RL10A_RA<br>T,sp Q4R5P3 RL10A_MACFA,<br>sp Q5E9E6 RL10A_BOVIN,tr<br> A1XQU2 A1XQU2_PIG,tr D<br>2GYW8 D<br>2GYW8_A<br>ILME,tr E<br>2R9V0 E2<br>R9V0_CA<br>NFA,tr F1<br>M8D2 F1<br>M8D2_RA<br>T,tr F1RYZ5 F1RYZ5_PIG,tr | Vk | 92% | 43.2 | 50.66456 | Ref | 0.14   | -0.37 | -0.05 | -0.52 | -0.23 | -0.29 | -0.38 | 2100 | 1800 | 1370 | 1920 | 1530 | 1640 | 1630 | 1530 | 466.5 | 1862.1 | 4 | 0.003 | 1.628 |
| 60S ribosomal protein L10a<br>OS=Mus musculus<br>GN=Rpl10a PE=1<br>SV=3 | 6 RL10A_MOUSE,s<br>p P62906<br> RL10A_HUMAN,sp<br> P62907 <br>RL10A_RA<br>T,sp Q4R5P3 RL10A_MACFA,<br>sp Q5E9E6 RL10A_BOVIN,tr<br> A1XQU2 A1XQU2_PIG,tr D<br>2GYW8 D<br>2GYW8_A<br>ILME,tr E<br>2R9V0 E2<br>R9V0_CA<br>NFA,tr F1<br>M8D2 F1<br>M8D2_RA<br>T,tr F1RYZ5 F1RYZ5_PIG,tr | Vk | 95% | 60.8 | 51.1916  | Ref | -0.063 | -0.73 | 0.015 | -0.15 | -0.33 | -0.03 | -0.3  | 756  | 610  | 418  | 784  | 770  | 596  | 765  | 629  | 621.7 | 1862.1 | 3 | 0.018 | 9.654 |

|                                                          |                                             |                     |     |      |          |     |      |       |      |        |      |       |      |       |       |       |       |       |       |       |       |       |        |   |        |       |
|----------------------------------------------------------|---------------------------------------------|---------------------|-----|------|----------|-----|------|-------|------|--------|------|-------|------|-------|-------|-------|-------|-------|-------|-------|-------|-------|--------|---|--------|-------|
| 60S ribosomal protein L6 OS=Bos taurus GN=RPL6 PE=2 SV=3 | sp Q58DQ3 RL6_BOVIN, tr B0LRM7 B0LRM7_SHEEP | aSITPGTI<br>LIILTGR | 57% | 29.4 | 49.07476 | Ref | 0.91 | -0.69 | 0.54 | -0.26  | 0.54 | -0.44 | 0.47 | 383   | 571   | 204   | 538   | 340   | 518   | 273   | 510   | 915.6 | 1829.1 | 2 | 0.0049 | 2.656 |
| 60S ribosomal protein L6 OS=Bos taurus GN=RPL6 PE=2 SV=3 | sp Q58DQ3 RL6_BOVIN, tr B0LRM7 B0LRM7_SHEEP | fVIA<br>TSTK        | 77% | 35.6 | 50.39383 | Ref | 0.46 | -0.21 | 0.68 | 0.17   | 0.35 | 0.17  | 0.32 | 7620  | 10600 | 7220  | 15000 | 11600 | 11500 | 10600 | 11700 | 492.3 | 1473.9 | 3 | 0.0047 | 3.187 |
| 60S ribosomal protein L6 OS=Bos taurus GN=RPL6 PE=2 SV=3 | sp Q58DQ3 RL6_BOVIN, tr B0LRM7 B0LRM7_SHEEP | hQE<br>GEIF<br>DTER | 84% | 37.5 | 50.47949 | Ref | 0.75 | -0.33 | 0.53 | 0.011  | 0.46 | -0.11 | 0.35 | 4640  | 6980  | 3570  | 7280  | 5610  | 6700  | 4710  | 6420  | 832.9 | 1663.8 | 2 | 0.0126 | 7.543 |
| 60S ribosomal protein L6 OS=Bos taurus GN=RPL6 PE=2 SV=3 | sp Q58DQ3 RL6_BOVIN, tr B0LRM7 B0LRM7_SHEEP | hQE<br>GEIF<br>DTER | 95% | 49.1 | 50.49687 | Ref | 0.64 | -0.03 | 0.44 | -0.068 | 0.4  | -0.14 | 0.46 | 35800 | 47000 | 32000 | 50100 | 38700 | 46700 | 33600 | 50700 | 555.6 | 1663.8 | 3 | 0.012  | 7.222 |



|                                                                       |                                                                                                                                                                                                                                                                                                                               |            |     |      |          |     |                                       |      |      |       |      |       |      |      |                                       |      |      |      |      |      |      |       |        |   |        |       |
|-----------------------------------------------------------------------|-------------------------------------------------------------------------------------------------------------------------------------------------------------------------------------------------------------------------------------------------------------------------------------------------------------------------------|------------|-----|------|----------|-----|---------------------------------------|------|------|-------|------|-------|------|------|---------------------------------------|------|------|------|------|------|------|-------|--------|---|--------|-------|
| 40S ribosomal protein S15<br>OS=Homo sapiens<br>GN=RPS15 PE=1<br>SV=2 | 1 RS15_H<br>UMAN,sp<br> P62842 <br>RS15_ME<br>SAU,sp P<br>62843 RS<br>15_MOUS<br>E,sp P628<br>44 RS15_<br>PIG,sp P6<br>2845 RS1<br>5_RAT,sp<br> Q56K10 <br>RS15_BO<br>VIN,sp Q<br>5RDI7 RS<br>15_PONA<br>B,tr B5KK<br>L3 B5KKL<br>3_AILME,t<br>r F6UJC4<br> F6UJC4_<br>ORNAN,tr<br> F6VFF5 <br>F6VFF5_<br>MACMU,t<br>r F7AS95 | aEVE<br>Qk | 67% | 31.3 | 49.31636 | Ref | Value<br>Missing (-<br>1.8860<br>887) | 0.27 | 0.47 | 0.095 | 0.26 | -0.01 | 0.22 | 2680 | Value<br>Missing (-<br>1.886088<br>7) | 3040 | 3910 | 3320 | 3260 | 2820 | 3280 | 525.3 | 1048.6 | 2 | 0.0078 | 7.415 |
| 40S ribosomal protein S15<br>OS=Homo sapiens<br>GN=RPS15 PE=1<br>SV=2 | 1 RS15_H<br>UMAN,sp<br> P62842 <br>RS15_ME<br>SAU,sp P<br>62843 RS<br>15_MOUS<br>E,sp P628<br>44 RS15_<br>PIG,sp P6<br>2845 RS1<br>5_RAT,sp<br> Q56K10 <br>RS15_BO<br>VIN,sp Q<br>5RDI7 RS<br>15_PONA<br>B,tr B5KK<br>L3 B5KKL<br>3_AILME,t<br>r F6UJC4<br> F6UJC4_<br>ORNAN,tr<br> F6VFF5 <br>F6VFF5_<br>MACMU,t<br>r F7AS95 | aEVE<br>Qk | 91% | 40.2 | 49.27113 | Ref | Value<br>Missing (-<br>1.9034<br>969) | 0.23 | 0.35 | 0.027 | 0.43 | -0.02 | 0.19 | 2840 | Value<br>Missing (-<br>1.903496<br>9) | 2890 | 3520 | 3110 | 3600 | 2750 | 3160 | 525.3 | 1048.6 | 2 | 0.0089 | 8.463 |

|                                                                       |                                                                                                                                                                                                                                                                                                                               |                                         |     |      |          |     |                                       |       |      |        |      |       |      |      |                                       |      |      |      |      |      |      |       |        |   |        |       |
|-----------------------------------------------------------------------|-------------------------------------------------------------------------------------------------------------------------------------------------------------------------------------------------------------------------------------------------------------------------------------------------------------------------------|-----------------------------------------|-----|------|----------|-----|---------------------------------------|-------|------|--------|------|-------|------|------|---------------------------------------|------|------|------|------|------|------|-------|--------|---|--------|-------|
| 40S ribosomal protein S15<br>OS=Homo sapiens<br>GN=RPS15 PE=1<br>SV=2 | 1 RS15_H<br>UMAN,sp<br> P62842 <br>RS15_ME<br>SAU,sp P<br>62843 RS<br>15_MOUS<br>E,sp P628<br>44 RS15_<br>PIG,sp P6<br>2845 RS1<br>5_RAT,sp<br> Q56K10 <br>RS15_BO<br>VIN,sp Q<br>5RDI7 RS<br>15_PONA<br>B,tr B5KK<br>L3 B5KKL<br>3_AILME,t<br>r F6UJC4<br> F6UJC4_<br>ORNAN,tr<br> F6VFF5 <br>F6VFF5_<br>MACMU,t<br>r F7AS95 | aEVE<br>Qk                              | 68% | 31.5 | 49.31595 | Ref | Value<br>Missing (-<br>1.9985<br>136) | 0.11  | 0.46 | -0.009 | 0.6  | 0.009 | 0.15 | 3430 | Value<br>Missing (-<br>1.998513<br>6) | 3630 | 5200 | 4130 | 5490 | 3820 | 4190 | 525.3 | 1048.6 | 2 | 0.0079 | 7.529 |
| 40S ribosomal protein S15<br>OS=Homo sapiens<br>GN=RPS15 PE=1<br>SV=2 | 1 RS15_H<br>UMAN,sp<br> P62842 <br>RS15_ME<br>SAU,sp P<br>62843 RS<br>15_MOUS<br>E,sp P628<br>44 RS15_<br>PIG,sp P6<br>2845 RS1<br>5_RAT,sp<br> Q56K10 <br>RS15_BO<br>VIN,sp Q<br>5RDI7 RS<br>15_PONA<br>B,tr B5KK<br>L3 B5KKL<br>3_AILME,t<br>r F6UJC4<br> F6UJC4_<br>ORNAN,tr<br> F6VFF5 <br>F6VFF5_<br>MACMU,t<br>r F7AS95 | dMII<br>LPE<br>MVG<br>SMV<br>GVY<br>nGk | 93% | 50.5 | 55.36173 | Ref | 0.17                                  | 0.053 | 0.19 | -0.043 | 0.13 | -0.27 | 0.14 | 1700 | 1660                                  | 1670 | 2070 | 1930 | 1900 | 1510 | 1990 | 888.1 | 2661.4 | 3 | 0.0127 | 4.784 |

|                                                                                     |                      |                            |     |      |          |     |       |       |       |        |       |       |      |       |        |       |        |        |       |       |        |       |        |   |        |       |
|-------------------------------------------------------------------------------------|----------------------|----------------------------|-----|------|----------|-----|-------|-------|-------|--------|-------|-------|------|-------|--------|-------|--------|--------|-------|-------|--------|-------|--------|---|--------|-------|
| ATP synthase subunit delta, mitochondrial<br>OS=Bos taurus<br>GN=ATP5D PE=1<br>SV=2 | sp P05630 ATPD_BOVIN | aQSE<br>LLGA<br>ADE<br>ATR | 95% | 64   | 52.48187 | Ref | 0.044 | 0.066 | 0.27  | -0.17  | 0.36  | -0.37 | 0.35 | 57300 | 52100  | 57400 | 74100  | 60300  | 76100 | 47900 | 78200  | 868.4 | 1734.9 | 2 | 0.0208 | 12.01 |
| ATP synthase subunit delta, mitochondrial<br>OS=Bos taurus<br>GN=ATP5D PE=1<br>SV=2 | sp P05630 ATPD_BOVIN | aQSE<br>LLGA<br>ADE<br>ATR | 95% | 65   | 52.68074 | Ref | 0.088 | 0.062 | 0.17  | -0.14  | 0.43  | -0.28 | 0.21 | 75700 | 68800  | 73400 | 89000  | 79000  | 1E+05 | 65400 | 91000  | 868.5 | 1734.9 | 2 | 0.013  | 7.513 |
| ATP synthase subunit delta, mitochondrial<br>OS=Bos taurus<br>GN=ATP5D PE=1<br>SV=2 | sp P05630 ATPD_BOVIN | aQSE<br>LLGA<br>ADE<br>ATR | 95% | 60.3 | 52.79247 | Ref | 0.6   | 0.31  | 0.057 | -0.24  | 0.093 | -0.23 | -0.3 | 26100 | 30900  | 27400 | 25800  | 23200  | 25400 | 21200 | 20000  | 579.3 | 1734.9 | 3 | 0.0112 | 6.427 |
| ATP synthase subunit delta, mitochondrial<br>OS=Bos taurus<br>GN=ATP5D PE=1<br>SV=2 | sp P05630 ATPD_BOVIN | iEAN<br>EALV<br>k          | 86% | 40.5 | 51.27801 | Ref | -0.21 | 0.019 | 0.29  | -0.069 | 0.5   | -0.27 | 0.33 | 1E+05 | 105000 | 1E+05 | 181000 | 156000 | 2E+05 | 1E+05 | 186000 | 532.3 | 1593.9 | 3 | 0.0159 | 9.949 |

|                                                                       |                                                                                                                                                                                                                                                                                                                                |                           |     |      |          |     |      |       |      |        |      |       |       |       |       |       |       |       |       |       |       |       |        |   |        |       |
|-----------------------------------------------------------------------|--------------------------------------------------------------------------------------------------------------------------------------------------------------------------------------------------------------------------------------------------------------------------------------------------------------------------------|---------------------------|-----|------|----------|-----|------|-------|------|--------|------|-------|-------|-------|-------|-------|-------|-------|-------|-------|-------|-------|--------|---|--------|-------|
| 60S ribosomal protein L22<br>OS=Homo sapiens<br>GN=RPL22 PE=1<br>SV=2 | 8 RL22_H<br>UMAN,sp<br> P67984 <br>RL22_MO<br>USE,sp P6<br>7985 RL2<br>2_PIG,sp <br>Q4R5I3 R<br>L22_MAC<br>FA,tr D2H<br>N89 D2H<br>N89_AIL<br>ME,tr D3<br>YC70 D3Y<br>C70_BOS<br>GF,tr D3Z<br>SC4 D3ZS<br>C4_RAT,tr<br> E2RMG4<br> E2RMG4<br>_CANFA,tr<br> F1M3S4 <br>F1M3S4_<br>RAT,tr F1<br>N301 F1N<br>301_BOVI<br>N,tr F1P | aGN<br>LGG<br>GVV<br>TIER | 92% | 44.2 | 52.36197 | Ref | 0.38 | -0.08 | 0.41 | -0.098 | 0.17 | -0.14 | 0.13  | 18200 | 19900 | 15700 | 24700 | 19200 | 20200 | 17000 | 20300 | 773.9 | 1545.9 | 2 | 0.0128 | 8.275 |
| 60S ribosomal protein L22<br>OS=Homo sapiens<br>GN=RPL22 PE=1<br>SV=2 | 8 RL22_H<br>UMAN,sp<br> P67984 <br>RL22_MO<br>USE,sp P6<br>7985 RL2<br>2_PIG,sp <br>Q4R5I3 R<br>L22_MAC<br>FA,tr D2H<br>N89 D2H<br>N89_AIL<br>ME,tr D3<br>YC70 D3Y<br>C70_BOS<br>GF,tr D3Z<br>SC4 D3ZS<br>C4_RAT,tr<br> E2RMG4<br> E2RMG4<br>_CANFA,tr<br> F1M3S4 <br>F1M3S4_<br>RAT,tr F1<br>N301 F1N<br>301_BOVI<br>N,tr F1P | iTVT<br>SEVP<br>FSK       | 67% | 34.9 | 52.442   | Ref | 0.53 | -0.38 | 0.41 | 0.018  | 0.43 | -0.3  | -0.02 | 18600 | 23700 | 13700 | 26800 | 22400 | 26000 | 16400 | 19700 | 606   | 1815   | 3 | 0.015  | 8.261 |

|                                                                       |                                                                                                                                                                                                                                                                                                                                |                     |     |      |          |     |      |       |      |       |       |       |       |       |       |       |       |       |       |       |       |       |        |   |        |       |
|-----------------------------------------------------------------------|--------------------------------------------------------------------------------------------------------------------------------------------------------------------------------------------------------------------------------------------------------------------------------------------------------------------------------|---------------------|-----|------|----------|-----|------|-------|------|-------|-------|-------|-------|-------|-------|-------|-------|-------|-------|-------|-------|-------|--------|---|--------|-------|
| 60S ribosomal protein L22<br>OS=Homo sapiens<br>GN=RPL22 PE=1<br>SV=2 | 8 RL22_H<br>UMAN,sp<br> P67984 <br>RL22_MO<br>USE,sp P6<br>7985 RL2<br>2_PIG,sp <br>Q4R5I3 R<br>L22_MAC<br>FA,tr D2H<br>N89 D2H<br>N89_AIL<br>ME,tr D3<br>YC70 D3Y<br>C70_BOS<br>GF,tr D3Z<br>SC4 D3ZS<br>C4_RAT,tr<br> E2RMG4<br> E2RMG4<br>_CANFA,tr<br> F1M3S4 <br>F1M3S4_<br>RAT,tr F1<br>N301 F1N<br>301_BOVI<br>N,tr F1P | ITVT<br>SEVP<br>FSk | 88% | 42.8 | 52.30168 | Ref | 0.42 | -0.05 | 0.23 | 0.029 | 0.27  | -0.07 | -0.01 | 16100 | 18400 | 14300 | 19600 | 18800 | 19400 | 16000 | 16600 | 606   | 1815   | 3 | 0.0108 | 5.948 |
| 60S ribosomal protein L22<br>OS=Homo sapiens<br>GN=RPL22 PE=1<br>SV=2 | 8 RL22_H<br>UMAN,sp<br> P67984 <br>RL22_MO<br>USE,sp P6<br>7985 RL2<br>2_PIG,sp <br>Q4R5I3 R<br>L22_MAC<br>FA,tr D2H<br>N89 D2H<br>N89_AIL<br>ME,tr D3<br>YC70 D3Y<br>C70_BOS<br>GF,tr D3Z<br>SC4 D3ZS<br>C4_RAT,tr<br> E2RMG4<br> E2RMG4<br>_CANFA,tr<br> F1M3S4 <br>F1M3S4_<br>RAT,tr F1<br>N301 F1N<br>301_BOVI<br>N,tr F1P | ITVT<br>SEVP<br>FSK | 91% | 42.7 | 52.21341 | Ref | 0.37 | -0.71 | 0.13 | -0.21 | -0.04 | 1.2   | -0.36 | 5970  | 8040  | 4120  | 8320  | 7210  | 7090  | 17000 | 5880  | 908.5 | 1815.1 | 2 | 0.0102 | 5.631 |

|                                                              |                                                                |                                |     |      |          |     |                                |                       |                               |                               |                               |                                |                               |                        |                                |                       |                               |                               |                               |                                |                               |       |        |   |        |       |
|--------------------------------------------------------------|----------------------------------------------------------------|--------------------------------|-----|------|----------|-----|--------------------------------|-----------------------|-------------------------------|-------------------------------|-------------------------------|--------------------------------|-------------------------------|------------------------|--------------------------------|-----------------------|-------------------------------|-------------------------------|-------------------------------|--------------------------------|-------------------------------|-------|--------|---|--------|-------|
| Uncharacterized protein OS=Bos taurus GN=Bt.22969 PE=3 SV=1  | tr E1BMJ0 E1BMJ0_BOVIN, tr F1MMJ0 F1MMJ0_BOVIN                 | hHL QDL EQAL STAV Fk           | 84% | 40.2 | 54.12968 | Ref | 0.41                           | 0.34                  | 0.45                          | 0.3                           | -0.03                         | 0.93                           | 0.5                           | 906                    | 1060                           | 1100                  | 1330                          | 1320                          | 917                           | 1870                           | 1370                          | 612.1 | 2444.3 | 4 | 0.0157 | 6.439 |
| Uncharacterized protein OS=Bos taurus GN=Bt.22969 PE=3 SV=1  | tr E1BMJ0 E1BMJ0_BOVIN, tr F1MMJ0 F1MMJ0_BOVIN                 | hQA TLEL TESG VEAT AAS VVS VAR | 77% | 40.6 | 55.29186 | Ref | Reference Missing (0.80654085) | No Value (-1.8152733) | Reference Missing (0.9853438) | Reference Missing (0.6750396) | Reference Missing (0.6850735) | Reference Missing (0.39460883) | Reference Missing (0.7540491) | No Values (-1.8999699) | Reference Missing (0.80654085) | No Value (-1.8152733) | Reference Missing (0.9853438) | Reference Missing (0.6750396) | Reference Missing (0.6850735) | Reference Missing (0.39460883) | Reference Missing (0.7540491) | 910.8 | 2729.4 | 3 | 0.0172 | 6.298 |
| Uncharacterized protein OS=Bos taurus GN=Bt.22969 PE=3 SV=1  | tr E1BMJ0 E1BMJ0_BOVIN, tr F1MMJ0 F1MMJ0_BOVIN                 | hQA TLEL TESG VEAT AAS VVS VAR | 95% | 104  | 55.29186 | Ref | 0.44                           | 0.32                  | 0.23                          | 0.5                           | 0.034                         | 0.61                           | 0.8                           | 287                    | 339                            | 337                   | 355                           | 474                           | 299                           | 467                            | 527                           | 910.8 | 2729.4 | 3 | 0.0172 | 6.298 |
| Uncharacterized protein OS=Bos taurus GN=Bt.22969 PE=3 SV=1  | tr E1BMJ0 E1BMJ0_BOVIN, tr F1MMJ0 F1MMJ0_BOVIN                 | hQA TLEL TESG VEAT AAS VVS VAR | 95% | 75.7 | 55.29586 | Ref | 0.67                           | 0.42                  | 0.36                          | 0.37                          | 0.29                          | 0.59                           | 0.15                          | 905                    | 1100                           | 1000                  | 1080                          | 1200                          | 988                           | 1280                           | 934                           | 683.4 | 2729.4 | 4 | 0.016  | 5.864 |
| Glucose-6-phosphate isomerase OS=Sus scrofa GN=GPI PE=1 SV=3 | sp P08059 G6PI_PIG, sp Q3ZBD7 G6PI_BOVIN, tr F1RNU9 F1RNU9_PIG | aALT QNP QFk                   | 95% | 58.2 | 52.6041  | Ref | -0.2                           | -0.16                 | 0.25                          | -0.19                         | 0.14                          | 0.5                            | 0.13                          | 684                    | 460                            | 514                   | 766                           | 622                           | 686                           | 916                            | 705                           | 732.4 | 1462.8 | 2 | 0.0152 | 10.41 |
| Glucose-6-phosphate isomerase OS=Sus scrofa GN=GPI PE=1 SV=3 | sp P08059 G6PI_PIG, sp Q3ZBD7 G6PI_BOVIN, tr F1RNU9 F1RNU9_PIG | aVLH VALR                      | 73% | 35.4 | 51.46423 | Ref | 0.19                           | 0.32                  | 0.21                          | -0.018                        | 0.064                         | 0.16                           | -0.22                         | 3900                   | 3810                           | 4520                  | 4690                          | 4430                          | 4090                          | 4550                           | 3480                          | 394.9 | 1181.7 | 3 | 0.01   | 8.459 |

|                                                              |                                                               |                |     |      |          |     |        |       |       |        |       |       |       |       |       |       |       |       |       |       |       |       |        |   |        |       |
|--------------------------------------------------------------|---------------------------------------------------------------|----------------|-----|------|----------|-----|--------|-------|-------|--------|-------|-------|-------|-------|-------|-------|-------|-------|-------|-------|-------|-------|--------|---|--------|-------|
| Glucose-6-phosphate isomerase OS=Sus scrofa GN=GPI PE=1 SV=3 | sp P08059 G6PI_PIG,sp Q3ZBD7 G6PI_BOVIN, tr F1RNU9 F1RNU9_PIG | aVLH VALR      | 77% | 36.6 | 51.46488 | Ref | 0.16   | 0.062 | 0.29  | 0.005  | 0.07  | 0.17  | 0.006 | 7100  | 7020  | 7100  | 9360  | 8450  | 7710  | 8650  | 7650  | 394.9 | 1181.7 | 3 | 0.0073 | 6.201 |
| Glucose-6-phosphate isomerase OS=Sus scrofa GN=GPI PE=1 SV=3 | sp P08059 G6PI_PIG,sp Q3ZBD7 G6PI_BOVIN, tr F1RNU9 F1RNU9_PIG | aVLH VALR      | 77% | 36.2 | 51.09514 | Ref | 0.18   | 0.14  | 0.28  | -0.019 | 0.059 | 0.25  | -0.11 | 3460  | 3510  | 3720  | 4590  | 4120  | 3790  | 4520  | 3490  | 394.9 | 1181.7 | 3 | 0.011  | 9.296 |
| Glucosidase 2 subunit beta OS=Bos taurus GN=PRKCSH PE=2 SV=1 | sp Q28034 GLU2B_BOVIN                                         | eTLQ QMA EVTR  | 89% | 41.8 | 52.23509 | Ref | 0.015  | -0.13 | -0    | -0.11  | 0.14  | -0.37 | 9E-05 | 58500 | 50700 | 49800 | 60900 | 62500 | 64500 | 47600 | 60900 | 805.4 | 1608.8 | 2 | 0.0172 | 10.68 |
| Glucosidase 2 subunit beta OS=Bos taurus GN=PRKCSH PE=2 SV=1 | sp Q28034 GLU2B_BOVIN                                         | eTVV TSTT EPSR | 70% | 35   | 52.3433  | Ref | -0.044 | -0.13 | 0.05  | -0.18  | 0.24  | -0.51 | 0.09  | 24800 | 21200 | 21600 | 27600 | 25900 | 30400 | 18800 | 28300 | 805.9 | 1609.8 | 2 | 0.0125 | 7.786 |
| Glucosidase 2 subunit beta OS=Bos taurus GN=PRKCSH PE=2 SV=1 | sp Q28034 GLU2B_BOVIN                                         | sLED QVE VLR   | 62% | 34.2 | 52.76158 | Ref | 0.17   | -0.09 | -0.11 | -0.16  | -0.05 | -0.39 | -0.03 | 4110  | 3490  | 3170  | 3500  | 3740  | 3520  | 2890  | 3680  | 497.9 | 1490.8 | 3 | 0.0108 | 7.217 |

|                                                                                        |                                                                                                                                                                                    |                             |     |      |          |     |       |       |       |       |      |      |       |       |       |       |       |       |       |       |       |       |        |   |        |       |
|----------------------------------------------------------------------------------------|------------------------------------------------------------------------------------------------------------------------------------------------------------------------------------|-----------------------------|-----|------|----------|-----|-------|-------|-------|-------|------|------|-------|-------|-------|-------|-------|-------|-------|-------|-------|-------|--------|---|--------|-------|
| Glucosidase 2 subunit beta<br>OS=Bos taurus<br>GN=PRKCSH PE=2<br>SV=1                  | sp Q28034 GLU2B_BOVIN                                                                                                                                                              | sLED<br>QVE<br>VLR          | 51% | 32   | 52.65773 | Ref | 0.095 | -0.03 | 0.035 | -0.21 | 0.14 | -0.4 | -0.02 | 61700 | 59700 | 59200 | 69800 | 64700 | 72200 | 52000 | 66800 | 746.4 | 1490.8 | 2 | 0.0094 | 6.282 |
| Thioredoxin domain containing protein 12<br>OS=Homo sapiens<br>GN=TXNDC12 PE=1<br>SV=1 | sp O95881 TXD12_HUMAN,sp Q5E936 TXD12_BOVIN,tr E2QSY3 E2QSY3_CANFA,tr F1S6G4 F1S6G4_PIG,tr F6R0F4 F6R0F4_MONDO,tr F6XFL5 F6XFL5_HORSE,tr F7FG46 F7FG46_MACMU,tr F710E2 F710E2_CALJ | eAA<br>ASGL<br>PLM<br>VIIHk | 95% | 55.2 | 52.19878 | Ref | -0.26 | 0.35  | 0.15  | 0.3   | 0.37 | 0.25 | 0.23  | 5720  | 4190  | 6940  | 6760  | 8260  | 7590  | 7300  | 7130  | 720.1 | 2157.3 | 3 | 0.0267 | 12.35 |



|                                                                                              |                                                                                                                                                                                                                                                                             |                             |     |      |          |     |        |      |      |      |      |      |      |      |      |      |      |      |      |      |      |       |        |   |        |       |
|----------------------------------------------------------------------------------------------|-----------------------------------------------------------------------------------------------------------------------------------------------------------------------------------------------------------------------------------------------------------------------------|-----------------------------|-----|------|----------|-----|--------|------|------|------|------|------|------|------|------|------|------|------|------|------|------|-------|--------|---|--------|-------|
| Thioredoxin domain<br>containing protein<br>12 OS=Homo<br>sapiens<br>GN=TXNDC12 PE=1<br>SV=1 | sp O9588<br>1 TXD12_<br>HUMAN,s<br>p Q5E936<br> TXD12_B<br>OVIN,tr E<br>2QSY3 E2<br>QSY3_CA<br>NFA,tr F1<br>S6G4 F1S<br>6G4_PIG,t<br>r F6R0F4<br> F6R0F4_<br>MONDO,t<br>r F6XFL5 <br>F6XFL5_H<br>ORSE,tr F<br>7FG46 F7<br>FG46_MA<br>CMU,tr F<br>7I0E2 F7I<br>0E2_CALJ<br>A | eAA<br>ASGL<br>PLM<br>VIIHk | 95% | 47.3 | 51.82375 | Ref | -0.059 | 0.33 | 0.19 | 0.27 | 0.13 | 0.35 | 0.23 | 1480 | 1220 | 1730 | 1770 | 2060 | 1630 | 1990 | 1810 | 540.3 | 2157.3 | 4 | 0.0172 | 7.976 |
| Thioredoxin domain<br>containing protein<br>12 OS=Homo<br>sapiens<br>GN=TXNDC12 PE=1<br>SV=1 | sp O9588<br>1 TXD12_<br>HUMAN,s<br>p Q5E936<br> TXD12_B<br>OVIN,tr E<br>2QSY3 E2<br>QSY3_CA<br>NFA,tr F1<br>S6G4 F1S<br>6G4_PIG,t<br>r F6R0F4<br> F6R0F4_<br>MONDO,t<br>r F6XFL5 <br>F6XFL5_H<br>ORSE,tr F<br>7FG46 F7<br>FG46_MA<br>CMU,tr F<br>7I0E2 F7I<br>0E2_CALJ<br>A | eAA<br>ASGL<br>PLM<br>VIIHk | 95% | 57.1 | 51.73029 | Ref | -0.23  | 0.19 | 0.23 | 0.24 | 0.46 | 0.17 | 0.27 | 2210 | 1560 | 2260 | 2600 | 2900 | 2940 | 2520 | 2670 | 720.1 | 2157.3 | 3 | 0.0166 | 7.681 |

|                                                                               |                                                                                                                                                                                      |                     |     |      |          |     |       |      |      |      |      |       |      |       |       |       |       |       |       |       |       |       |        |   |        |       |
|-------------------------------------------------------------------------------|--------------------------------------------------------------------------------------------------------------------------------------------------------------------------------------|---------------------|-----|------|----------|-----|-------|------|------|------|------|-------|------|-------|-------|-------|-------|-------|-------|-------|-------|-------|--------|---|--------|-------|
| Thioredoxin domain-containing protein 12 OS=Homo sapiens GN=TXNDC12 PE=1 SV=1 | sp O95881 TXD12_HUMAN,sp Q5E936 TXD12_BOVIN,tr E2QSY3 E2QSY3_CA_NFA,tr F1S6G4 F1S6G4_PIG,tr F6R0F4 F6R0F4_MONDO,tr F6XFL5 F6XFL5_HORSE,tr F7FG46 F7FG46_MA_CMU,tr F7I0E2 F7I0E2_CALI | hLED<br>EL          | 67% | 30.8 | 48.80351 | Ref | -0.21 | 0.34 | 0.17 | 0.38 | 0.45 | 0.054 | 0.27 | 23500 | 18900 | 30200 | 30100 | 38400 | 35200 | 27900 | 32000 | 530.3 | 1058.5 | 2 | 0.0089 | 8.381 |
| Protein S100-A4 OS=Homo sapiens GN=S100A4 PE=1 SV=1                           | sp P26447 S10A4_HUMAN,sp Q9TV56 S10A4_CANFA,tr D2HJR5 D2HJR5_ALME,tr F1SFV7 F1SFV7_PIG,tr F6UF75 F6UF75_HORSE,tr F6XCP7 F6XCP7_CALJA,tr F7GDB8 F7GDB8_M                              | aLDV<br>MVS<br>TFHK | 86% | 42.4 | 53.21698 | Ref | 0.39  | 0.54 | 0.65 | 0.84 | 1.2  | 0.45  | 0.92 | 10300 | 14000 | 17000 | 20400 | 25800 | 28900 | 17900 | 24600 | 619.4 | 1855   | 3 | 0.017  | 9.162 |

|                                                              |                                                                                                                                                             |                     |     |      |          |     |      |      |      |      |      |      |      |      |      |      |      |      |      |      |      |       |      |   |        |       |
|--------------------------------------------------------------|-------------------------------------------------------------------------------------------------------------------------------------------------------------|---------------------|-----|------|----------|-----|------|------|------|------|------|------|------|------|------|------|------|------|------|------|------|-------|------|---|--------|-------|
| Protein S100-A4<br>OS=Homo sapiens<br>GN=S100A4 PE=1<br>SV=1 | sp P26447 S10A4_HUMAN,sp Q9TV56 S10A4_CANFA,triD2HJR5 D2HJR5_AILME,triF1SFV7 F1SFV7_PIG,triF6UF75 F6UF75_HORSE,triF6XCP7 F6XCP7_CAJA,triF7GDB8 F7GDB8_MACMU | aLDV<br>MVS<br>TFHK | 90% | 45.6 | 53.12264 | Ref | 0.22 | 0.59 | 0.69 | 0.82 | 1.1  | 0.6  | 0.93 | 2090 | 2180 | 3030 | 3650 | 4400 | 4560 | 3460 | 4310 | 619.4 | 1855 | 3 | 0.0141 | 7.595 |
| Protein S100-A4<br>OS=Homo sapiens<br>GN=S100A4 PE=1<br>SV=1 | sp P26447 S10A4_HUMAN,sp Q9TV56 S10A4_CANFA,triD2HJR5 D2HJR5_AILME,triF1SFV7 F1SFV7_PIG,triF6UF75 F6UF75_HORSE,triF6XCP7 F6XCP7_CAJA,triF7GDB8 F7GDB8_MACMU | aLDV<br>MVS<br>TFHK | 87% | 43.1 | 53.123   | Ref | 0.32 | 0.5  | 0.62 | 0.84 | 0.92 | 0.65 | 0.93 | 2450 | 2270 | 2790 | 3400 | 4380 | 4050 | 3500 | 4230 | 619.4 | 1855 | 3 | 0.0139 | 7.498 |

|                                                                                    |                                                                                                                                                                                                                  |         |     |      |          |     |       |       |                            |       |      |                            |      |       |       |       |                            |       |       |                            |       |       |        |   |        |       |
|------------------------------------------------------------------------------------|------------------------------------------------------------------------------------------------------------------------------------------------------------------------------------------------------------------|---------|-----|------|----------|-----|-------|-------|----------------------------|-------|------|----------------------------|------|-------|-------|-------|----------------------------|-------|-------|----------------------------|-------|-------|--------|---|--------|-------|
| Protein S100-A4<br>OS=Homo sapiens<br>GN=S100A4 PE=1<br>SV=1                       | sp P26447 S10A4_HUMAN,sp Q9TV56 S10A4_CANFA,tr D2HJR5 D2HJR5_ALME,tr F1SFV7 F1SFV7_PIG, tr F6UF75 F6UF75_HORSE,tr F6XCP7 F6XCP7_CAJA,tr F7GDB8 F7GDB8_MACMU                                                      | tDEAFQk | 81% | 37.9 | 52.1235  | Ref | 0.19  | 0.8   | 0.62                       | 0.91  | 1.2  | 0.33                       | 0.77 | 16700 | 16200 | 26900 | 26500                      | 35700 | 37400 | 21900                      | 29400 | 759.4 | 1516.8 | 2 | 0.0248 | 16.31 |
| Serine/arginine-rich splicing factor 2<br>OS=Homo sapiens<br>GN=SRSF2 PE=1<br>SV=4 | Q SRSF2_HUMAN,sp Q06A98 SRSF2_PIG,sp Q3MHR5 SRSF2_BOVIN,sp Q5R1W5 SRSF2_PANTR,sp Q62093 SRSF2_MOUSE,sp Q6PDU1 SRSF2_RAT,tr A2AA29 AA29_MOUSE,tr B3KUF7 B3KUF7_HUMAN,tr B3KVY2 B3KVY2_HUMAN,tr B3KX15 B3KX15_HUMA | gFAFVR  | 52% | 29.3 | 49.51527 | Ref | -0.12 | -0.12 | Value Missing (-0.6556876) | -0.38 | 0.98 | Value Missing (-0.6630611) | 0.82 | 3410  | 2850  | 3110  | Value Missing (-0.6556876) | 3200  | 7190  | Value Missing (-0.6630611) | 6660  | 334.2 | 999.57 | 3 | 0.0133 | 13.32 |

|                                                                                       |                                                                                                                                                                                                                                                                                                                      |                                  |     |      |          |     |        |       |       |        |      |       |       |       |       |       |       |       |       |       |       |       |        |   |        |       |
|---------------------------------------------------------------------------------------|----------------------------------------------------------------------------------------------------------------------------------------------------------------------------------------------------------------------------------------------------------------------------------------------------------------------|----------------------------------|-----|------|----------|-----|--------|-------|-------|--------|------|-------|-------|-------|-------|-------|-------|-------|-------|-------|-------|-------|--------|---|--------|-------|
| Serine/arginine-rich<br>splicing factor 2<br>OS=Homo sapiens<br>GN=SRSF2 PE=1<br>SV=4 | 0 SRSF2_ HUMAN,s<br>p Q06A9<br>8 SRSF2_ PIG,sp Q3<br>MHR5 SR<br>SF2_BOVI<br>N,sp Q5R<br>1W5 SRS<br>F2_PANT<br>R,sp Q62<br>093 SRSF<br>2_MOUSE<br>,sp Q6PD<br>U1 SRSF2<br>_RAT,tr A<br>2AA29 A2<br>AA29_MO<br>USE,tr B3<br>KUF7 B3K<br>UF7_HUM<br>AN,tr B3K<br>VY2 B3KV<br>Y2_HUMA<br>N,tr B3KX<br>15 B3KX1<br>5_HUMA | SYGR<br>PPP<br>DVE<br>GmT<br>SLk | 59% | 34   | 53.10474 | Ref | -0.055 | 0.17  | 0.098 | -0.005 | 0.26 | 0.22  | 0.062 | 19600 | 16300 | 20700 | 22100 | 22700 | 23900 | 24100 | 21500 | 699.4 | 2095   | 3 | 0.015  | 7.159 |
| Serine/arginine-rich<br>splicing factor 2<br>OS=Homo sapiens<br>GN=SRSF2 PE=1<br>SV=4 | 0 SRSF2_ HUMAN,s<br>p Q06A9<br>8 SRSF2_ PIG,sp Q3<br>MHR5 SR<br>SF2_BOVI<br>N,sp Q5R<br>1W5 SRS<br>F2_PANT<br>R,sp Q62<br>093 SRSF<br>2_MOUSE<br>,sp Q6PD<br>U1 SRSF2<br>_RAT,tr A<br>2AA29 A2<br>AA29_MO<br>USE,tr B3<br>KUF7 B3K<br>UF7_HUM<br>AN,tr B3K<br>VY2 B3KV<br>Y2_HUMA<br>N,tr B3KX<br>15 B3KX1<br>5_HUMA | VGD<br>VYIP<br>R                 | 91% | 43.8 | 51.05514 | Ref | 0.12   | 0.093 | 0.19  | -0.12  | 0.56 | -0.53 | 0.24  | 12700 | 12100 | 12800 | 15400 | 13700 | 19200 | 9360  | 15900 | 408.2 | 1221.7 | 3 | 0.0074 | 6.013 |

|                                                                                              |                                                                                                                                                                                                                                                                                   |                             |            |             |                 |            |              |              |              |               |              |              |              |              |              |              |              |              |              |              |              |              |               |          |               |              |
|----------------------------------------------------------------------------------------------|-----------------------------------------------------------------------------------------------------------------------------------------------------------------------------------------------------------------------------------------------------------------------------------|-----------------------------|------------|-------------|-----------------|------------|--------------|--------------|--------------|---------------|--------------|--------------|--------------|--------------|--------------|--------------|--------------|--------------|--------------|--------------|--------------|--------------|---------------|----------|---------------|--------------|
| <p>Serine/arginine-rich splicing factor 2<br/>OS=Homo sapiens<br/>GN=SRSF2 PE=1<br/>SV=4</p> | <p>0 SRSF2_HUMAN,sp Q06A98 SRSF2_PIG,sp Q3MHR5 SRSF2_BOVIN,sp Q5R1W5 SRSF2_PANTR,sp Q62093 SRSF2_MOUSE,sp Q6PDU1 SRSF2_RAT,transcript AA29 AA29_MOUSE,transcript B3KUF7 B3KUF7_HUMAN,transcript B3KVY2 B3KVY2_HUMAN,transcript B3KX15 B3KX15_HUMAN</p>                            | <p>VGD<br/>VYIP<br/>R</p>   | <p>84%</p> | <p>37.9</p> | <p>51.14711</p> | <p>Ref</p> | <p>-0.03</p> | <p>0.15</p>  | <p>0.087</p> | <p>-0.026</p> | <p>0.58</p>  | <p>-0.55</p> | <p>0.23</p>  | <p>18900</p> | <p>14900</p> | <p>18400</p> | <p>19700</p> | <p>20100</p> | <p>26800</p> | <p>12700</p> | <p>21700</p> | <p>611.9</p> | <p>1221.7</p> | <p>2</p> | <p>0.0104</p> | <p>8.47</p>  |
| <p>Filamin-A OS=Homo sapiens GN=FLNA PE=1 SV=4</p>                                           | <p>sp P21333 FLNA_HUMAN,transcript A9CB59 A9CB59_PAN,transcript E9KL45 E9KL45_HUMAN,transcript F6YST5 F6YST5_MACMU,transcript F7GCM2 F7GCM2_MACMU,transcript F7GCM8 F7GCM8_MACMU,transcript Q5HY54 Q5HY54_HUMAN,transcript Q60FE5 Q60FE5_HUMAN,transcript Q60FE6 Q60FE6_HUMAN</p> | <p>eTGE<br/>HLV<br/>HVk</p> | <p>50%</p> | <p>30.3</p> | <p>52.72376</p> | <p>Ref</p> | <p>-0.12</p> | <p>-0.13</p> | <p>-0.17</p> | <p>-0.18</p>  | <p>-0.08</p> | <p>-0.16</p> | <p>-0.33</p> | <p>30500</p> | <p>25100</p> | <p>27100</p> | <p>29500</p> | <p>32300</p> | <p>30200</p> | <p>29900</p> | <p>26300</p> | <p>440</p>   | <p>1756</p>   | <p>4</p> | <p>0.0243</p> | <p>13.83</p> |

|                                             |                                                                                                                                                                                                                    |                |     |      |          |     |       |       |       |        |       |       |       |       |      |       |       |       |       |       |       |       |        |   |        |       |
|---------------------------------------------|--------------------------------------------------------------------------------------------------------------------------------------------------------------------------------------------------------------------|----------------|-----|------|----------|-----|-------|-------|-------|--------|-------|-------|-------|-------|------|-------|-------|-------|-------|-------|-------|-------|--------|---|--------|-------|
| Filamin-A OS=Homo sapiens GN=FLNA PE=1 SV=4 | sp P21333 FLNA_HUMAN, tr A9CB59 A9CB59_PAN, tr E9KL45 E9KL45_HUMAN, tr F6YST5 F6YST5_MACMU, tr F7GCM2 F7GCM2_MACMU, tr F7GCM2 F7GCM2_MACMU, tr Q5HY54 Q5HY54_HUMAN, tr Q60FE5 Q60FE5_HUMAN, tr Q60FE6 Q60FE6_HUMAN | eTGEHLVHvk     | 73% | 36.2 | 52.70455 | Ref | -0.3  | -0.08 | -0.31 | -0.044 | -0.24 | -0.06 | -0.23 | 3360  | 2320 | 2940  | 2810  | 3720  | 2840  | 3360  | 2960  | 879   | 1756   | 2 | 0.0144 | 8.185 |
| Filamin-A OS=Homo sapiens GN=FLNA PE=1 SV=4 | sp P21333 FLNA_HUMAN, tr A9CB59 A9CB59_PAN, tr E9KL45 E9KL45_HUMAN, tr F6YST5 F6YST5_MACMU, tr F7GCM2 F7GCM2_MACMU, tr F7GCM2 F7GCM2_MACMU, tr Q5HY54 Q5HY54_HUMAN, tr Q60FE5 Q60FE5_HUMAN, tr Q60FE6 Q60FE6_HUMAN | tGVAVNkPAEFTVD | 78% | 38.3 | 52.89475 | Ref | -0.33 | 0.012 | -0.2  | -0.004 | -0.19 | -0.17 | -0.38 | 14600 | 9910 | 13700 | 13200 | 16700 | 12900 | 13600 | 11700 | 853.8 | 2558.5 | 3 | 0.0272 | 10.63 |

|                                                                             |                                                                                                                                                                                                                            |                                  |     |    |          |     |       |       |       |       |       |       |       |       |       |       |       |       |       |       |       |       |        |   |        |       |
|-----------------------------------------------------------------------------|----------------------------------------------------------------------------------------------------------------------------------------------------------------------------------------------------------------------------|----------------------------------|-----|----|----------|-----|-------|-------|-------|-------|-------|-------|-------|-------|-------|-------|-------|-------|-------|-------|-------|-------|--------|---|--------|-------|
| Filamin-A OS=Homo sapiens GN=FLNA PE=1 SV=4                                 | sp P21333 FLNA_HUMAN, tr A9CB59 A9CB59_PAN, tr E9KL45 E9KL45_HUMAN, tr F6YST5 F6YST5_MACMU, tr F7GCM2 F7GCM2_MACMU, tr F7GCM2 F7GCM2_MACMU, tr Q5HY54 Q5HY54_HUMAN, tr Q60FE5 Q60FE5_HUMAN, tr Q60FE6 Q60FE6_HUMAN         | tGVA<br>VNK<br>PAEF<br>TVD<br>AK | 92% | 47 | 53.10145 | Ref | -0.28 | -0.08 | -0.12 | -0.28 | -0.11 | -0.02 | -0.31 | 3840  | 2790  | 3470  | 3800  | 3740  | 3670  | 4100  | 3320  | 853.8 | 2558.5 | 3 | 0.0334 | 13.06 |
| Cell division control protein 42 homolog OS=Mus musculus GN=Cdc42 PE=1 SV=2 | 6 CDC42_MOUSE, sp P60952 CDC42_CANFA, sp P60953 CDC42_HUMAN, sp Q007T2 CDC42_PIG, sp Q2KJ93 CDC42_BOVIN, sp Q4R4R6 CDC42_MACFA, sp Q8CFN2 CDC42_RAT, tr B4E1U9 B4E1U9_HUMAN, tr B6VAP7 B6VAP7_BOVIN, tr D2HCB2 D2HCB2_AILM | cVVV<br>GDG<br>AVG<br>k          | 89% | 42 | 52.92938 | Ref | 0.15  | -0.11 | 0.042 | -0.14 | -0.17 | -0.01 | -0.22 | 11800 | 11100 | 10000 | 12500 | 12200 | 10400 | 12100 | 10400 | 829.5 | 1656.9 | 2 | 0.0136 | 8.232 |



|                                                                             |                                                                                                                                                                                                                   |             |     |      |          |     |      |       |       |       |       |       |       |       |       |       |       |       |       |       |       |       |        |   |        |       |
|-----------------------------------------------------------------------------|-------------------------------------------------------------------------------------------------------------------------------------------------------------------------------------------------------------------|-------------|-----|------|----------|-----|------|-------|-------|-------|-------|-------|-------|-------|-------|-------|-------|-------|-------|-------|-------|-------|--------|---|--------|-------|
| Cell division control protein 42 homolog OS=Mus musculus GN=Cdc42 PE=1 SV=2 | 6 CDC42_MOUSE,sp P60952 CDC42_CANFA,sp P60953 CDC42_HUMAN,sp Q007T2 CDC42_PIG,sp Q2KJ93 CDC42_BOVIN,sp Q4R4R6 CDC42_MACFA,sp Q8CFN2 CDC42_RAT,tr B4E1U9 B4E1U9_HUMAN,tr B6VAP7 B6VAP7_BOVIN,tr D2HCB2 D2HCB2_AILM | cVVVGDGAVGk | 72% | 36.6 | 52.87497 | Ref | 0.14 | -0.19 | -0.13 | -0.11 | -0.2  | 0.1   | -0.3  | 16200 | 13500 | 11600 | 13600 | 15200 | 12500 | 16000 | 12100 | 553.3 | 1656.9 | 3 | 0.0105 | 6.323 |
| Cell division control protein 42 homolog OS=Mus musculus GN=Cdc42 PE=1 SV=2 | 6 CDC42_MOUSE,sp P60952 CDC42_CANFA,sp P60953 CDC42_HUMAN,sp Q007T2 CDC42_PIG,sp Q2KJ93 CDC42_BOVIN,sp Q4R4R6 CDC42_MACFA,sp Q8CFN2 CDC42_RAT,tr B4E1U9 B4E1U9_HUMAN,tr B6VAP7 B6VAP7_BOVIN,tr D2HCB2 D2HCB2_AILM | cVVVGDGAVGk | 87% | 42.8 | 52.87497 | Ref | 0.11 | -0.2  | -0.04 | -0.04 | -0.04 | 0.014 | -0.17 | 25800 | 24900 | 21800 | 27400 | 30100 | 26300 | 28500 | 24900 | 553.3 | 1656.9 | 3 | 0.0105 | 6.323 |

|                                                                             |                                                                                                                                                                                                                   |                                   |     |      |          |     |        |       |       |       |       |       |       |       |       |       |       |       |       |       |       |       |        |   |        |       |
|-----------------------------------------------------------------------------|-------------------------------------------------------------------------------------------------------------------------------------------------------------------------------------------------------------------|-----------------------------------|-----|------|----------|-----|--------|-------|-------|-------|-------|-------|-------|-------|-------|-------|-------|-------|-------|-------|-------|-------|--------|---|--------|-------|
| Cell division control protein 42 homolog OS=Mus musculus GN=Cdc42 PE=1 SV=2 | 6 CDC42_MOUSE,sp P60952 CDC42_CANFA,sp P60953 CDC42_HUMAN,sp Q007T2 CDC42_PIG,sp Q2KJ93 CDC42_BOVIN,sp Q4R4R6 CDC42_MACFA,sp Q8CFN2 CDC42_RAT,tr B4E1U9 B4E1U9_HUMAN,tr B6VAP7 B6VAP7_BOVIN,tr D2HCB2 D2HCB2_AILM | nVF<br>DEAI<br>LAAL<br>EPPE<br>Pk | 78% | 39.7 | 54.15332 | Ref | 0.0041 | -0.17 | -0    | -0.1  | 0.018 | -0.02 | -0.01 | 1750  | 1660  | 1600  | 2010  | 2070  | 1960  | 1990  | 2000  | 821.1 | 2460.4 | 3 | 0.0126 | 5.104 |
| Uncharacterized protein (Fragment) OS=Bos taurus PE=4 SV=1                  | tr F1MQ37 F1MQ37_BOVIN                                                                                                                                                                                            | aDTE<br>HK                        | 51% | 31.5 | 51.95424 | Ref | -0.55  | 0.39  | -0.74 | -0.39 | -0.56 | -0.14 | -0.53 | 26000 | 14500 | 30200 | 15500 | 21800 | 16800 | 23600 | 17900 | 436.9 | 1307.7 | 3 | 0.0046 | 3.532 |
| Uncharacterized protein (Fragment) OS=Bos taurus PE=4 SV=1                  | tr F1MQ37 F1MQ37_BOVIN                                                                                                                                                                                            | dVLL<br>QVD<br>DER<br>R           | 62% | 34.3 | 52.82989 | Ref | -0.15  | 0.076 | -0.59 | -0.28 | -0.46 | -0.37 | -0.27 | 9180  | 7720  | 9780  | 6930  | 9430  | 7280  | 8120  | 8600  | 554.6 | 1660.9 | 3 | 0.0128 | 7.71  |
| Uncharacterized protein (Fragment) OS=Bos taurus PE=4 SV=1                  | tr F1MQ37 F1MQ37_BOVIN                                                                                                                                                                                            | qSVS<br>NLEK                      | 78% | 36.5 | 51.78799 | Ref | -0.66  | 0.44  | -0.83 | -0.33 | -0.61 | -0.04 | -0.46 | 17400 | 9610  | 22300 | 10400 | 16200 | 11700 | 18100 | 13400 | 756.9 | 1511.9 | 2 | 0.0074 | 4.901 |

|                                                                  |                                                                                                                                                                                                                   |                      |     |      |          |     |        |      |       |       |       |       |       |       |      |       |      |       |      |       |       |       |        |   |        |       |
|------------------------------------------------------------------|-------------------------------------------------------------------------------------------------------------------------------------------------------------------------------------------------------------------|----------------------|-----|------|----------|-----|--------|------|-------|-------|-------|-------|-------|-------|------|-------|------|-------|------|-------|-------|-------|--------|---|--------|-------|
| Uncharacterized protein (Fragment)<br>OS=Bos taurus PE=4<br>SV=1 | tr F1MQ37 F1MQ37_BOVIN                                                                                                                                                                                            | qSVS<br>nLEk         | 53% | 31.7 | 52.19645 | Ref | -0.56  | 0.27 | -0.79 | -0.25 | -0.62 | -0.07 | -0.32 | 14100 | 8320 | 16000 | 8630 | 13800 | 9330 | 14200 | 11900 | 757.4 | 1512.8 | 2 | 0.0269 | 17.8  |
| Collagen alpha-2(V) chain OS=Homo sapiens GN=COL5A2 PE=1 SV=3    | 7 CO5A2_HUMAN,sp Q3U962 CO5A2_MOUSE,tr B4DNJ0 B4DNJ0_HUMAN,tr D2HA12 D2HA12_AILME,tr F1LQ00 F1LQ00_RAT,tr F1N2Y2_BOVIN,tr F1PG08 F1PG08_CANFA,tr F6V0F2 F6V0F2_MACMU,tr F6V6S9 F6V6S9_MACMU,tr F7BH47 F7BH47_PGLk | gFPG<br>APGL<br>PGLk | 52% | 31.6 | 51.98335 | Ref | -0.056 | 0.72 | -0.42 | 0.016 | -0.27 | 0.5   | -0.21 | 2720  | 2140 | 3960  | 2020 | 3010  | 2150 | 3850  | 2330  | 573.7 | 1718   | 3 | 0.023  | 13.39 |

|                                                                        |                                                                                                                                                                                                                                                             |                                 |     |      |          |     |       |     |       |       |       |      |       |       |      |       |      |       |      |       |       |       |        |   |        |       |
|------------------------------------------------------------------------|-------------------------------------------------------------------------------------------------------------------------------------------------------------------------------------------------------------------------------------------------------------|---------------------------------|-----|------|----------|-----|-------|-----|-------|-------|-------|------|-------|-------|------|-------|------|-------|------|-------|-------|-------|--------|---|--------|-------|
| Collagen alpha-2(V)<br>chain OS=Homo<br>sapiens GN=COL5A2<br>PE=1 SV=3 | 7 CO5A2_HUMAN,<br>sp Q3U962 CO5A2_MOUSE,t<br>r B4DNJ0 B4DNJ0_HUMAN,t<br>r D2HA12 D2HA12_AILME,tr<br> F1LQ00 F1LQ00_R<br>AT,tr F1N2Y2 F1N2Y2_BOVIN<br>,tr F1PG08 F1PG08_CANFA,tr<br> F6V0F2 F6V0F2_MACMU,t<br>r F6V6S9 F6V6S9_MACMU,t<br>r F7BH47 F7BH47_GPR | gRP<br>GPA<br>GPP<br>GSQ<br>GPR | 63% | 34.6 | 52.91296 | Ref | -0.26 | 1   | -0.74 | -0.21 | -0.3  | 0.74 | -0.33 | 5930  | 4860 | 13000 | 4240 | 6740  | 5550 | 11900 | 5630  | 564.6 | 1690.9 | 3 | 0.0172 | 10.19 |
| Collagen alpha-2(V)<br>chain OS=Homo<br>sapiens GN=COL5A2<br>PE=1 SV=3 | 7 CO5A2_HUMAN,<br>sp Q3U962 CO5A2_MOUSE,t<br>r B4DNJ0 B4DNJ0_HUMAN,t<br>r D2HA12 D2HA12_AILME,tr<br> F1LQ00 F1LQ00_R<br>AT,tr F1N2Y2 F1N2Y2_BOVIN<br>,tr F1PG08 F1PG08_CANFA,tr<br> F6V0F2 F6V0F2_MACMU,t<br>r F6V6S9 F6V6S9_MACMU,t<br>r F7BH47 F7BH47_GPR | gRP<br>GPA<br>GPP<br>GSQ<br>GPR | 68% | 35.6 | 52.90035 | Ref | -0.4  | 1.1 | -1.1  | -0.28 | -0.54 | 0.96 | -0.52 | 13800 | 9320 | 29100 | 7140 | 13600 | 9930 | 29500 | 10500 | 564.6 | 1690.9 | 3 | 0.0163 | 9.661 |

|                                                                        |                                                                                                                                                                                                                                                                                                                              |                                     |     |      |          |     |       |      |       |       |       |      |       |       |      |       |      |       |      |       |      |       |        |   |        |       |
|------------------------------------------------------------------------|------------------------------------------------------------------------------------------------------------------------------------------------------------------------------------------------------------------------------------------------------------------------------------------------------------------------------|-------------------------------------|-----|------|----------|-----|-------|------|-------|-------|-------|------|-------|-------|------|-------|------|-------|------|-------|------|-------|--------|---|--------|-------|
| Collagen alpha-2(V)<br>chain OS=Homo<br>sapiens GN=COL5A2<br>PE=1 SV=3 | 7 CO5A2<br>_HUMAN,<br>sp Q3U96<br>2 CO5A2<br>_MOUSE,t<br>r B4DNJ0<br> B4DNJ0_<br>HUMAN,t<br>r D2HA12<br> D2HA12<br>_A1LME,tr<br> F1LQ00 <br>F1LQ00_R<br>AT,tr F1N<br>2Y2 F1N2<br>Y2_BOVIN<br>,tr F1PG0<br>8 F1PG08<br>_CANFA,tr<br> F6V0F2 <br>F6V0F2_<br>MACMU,t<br>r F6V6S9<br> F6V6S9_<br>MACMU,t<br>r F7BH47<br> F7BH47_ | gRP<br>GPA<br>GPP<br>GSQ            | 79% | 38.6 | 52.89565 | Ref | -0.31 | 0.93 | -0.52 | -0.09 | -0.16 | 0.57 | -0.37 | 11000 | 7500 | 19300 | 7920 | 11700 | 9770 | 16900 | 8730 | 564.6 | 1690.9 | 3 | 0.0152 | 9.005 |
| Histone H2A type 2-<br>C OS=Bos taurus<br>GN=HIST2H2AC<br>PE=2 SV=1    | 1 H2A2C_<br>BOVIN,sp<br> A9UMV8<br> H2AJ_RA<br>T,sp P022<br>62 H2A1_<br>RAT,sp P<br>04908 H2<br>A1B_HU<br>MAN,sp P<br>0C0S8 H2<br>A1_HUM<br>AN,sp P0<br>C0S9 H2A<br>1_BOVIN,<br>sp P0C16<br>9 H2A1C_<br>RAT,sp P<br>0C170 H2<br>A1E_RAT,<br>sp P0CC0<br>9 H2A2A<br>_RAT,sp <br>P20671 H<br>2A1D_HU<br>MAN,sp P<br>22752 H2   | VTIA<br>QGG<br>VLPN<br>IQAV<br>LLPk | 95% | 94.1 | 43.16955 | Ref | -0.81 | 0.52 | -1.5  | 0.28  | 0.28  | 0.19 | 0.56  | 4320  | 2600 | 7130  | 1940 | 7490  | 6530 | 6400  | 8220 | 1270  | 2538.6 | 2 | 0.0134 | 5.295 |

|                                                           |                                                                                                                                                                                                                    |                                     |     |      |          |     |       |      |       |      |       |       |      |      |     |      |     |      |      |      |      |       |        |   |        |       |
|-----------------------------------------------------------|--------------------------------------------------------------------------------------------------------------------------------------------------------------------------------------------------------------------|-------------------------------------|-----|------|----------|-----|-------|------|-------|------|-------|-------|------|------|-----|------|-----|------|------|------|------|-------|--------|---|--------|-------|
| Histone H2A type 2-C OS=Bos taurus GN=HIST2H2AC PE=2 SV=1 | 1 H2A2C_BOVIN,sp A9UMV8 H2AJ_RAT,sp P02262 H2A1_RAT,sp P04908 H2A1B_HUMAN,sp P0C0S8 H2A1_HUMAN,sp P0C0S9 H2A1_BOVIN,sp P0C169 H2A1C_RAT,sp P0C170 H2A1E_RAT,sp P0CC09 H2A2A_RAT,sp P20671 H2A1D_HUMAN,sp P22752 H2 | VTIA<br>QGG<br>VLPN<br>IQAV<br>LLPk | 95% | 50.1 | 46.58002 | Ref | -0.61 | 0.52 | -0.94 | 0.13 | -0.08 | 0.29  | 0.46 | 1190 | 692 | 1640 | 668 | 1550 | 1170 | 1580 | 1770 | 847.2 | 2538.5 | 3 | 0.0238 | 9.387 |
| Histone H2A type 2-C OS=Bos taurus GN=HIST2H2AC PE=2 SV=1 | 1 H2A2C_BOVIN,sp A9UMV8 H2AJ_RAT,sp P02262 H2A1_RAT,sp P04908 H2A1B_HUMAN,sp P0C0S8 H2A1_HUMAN,sp P0C0S9 H2A1_BOVIN,sp P0C169 H2A1C_RAT,sp P0C170 H2A1E_RAT,sp P0CC09 H2A2A_RAT,sp P20671 H2A1D_HUMAN,sp P22752 H2 | VTIA<br>QGG<br>VLPN<br>IQAV<br>LLPk | 80% | 30.8 | 46.44566 | Ref | -0.43 | 0.42 | -0.97 | 0.11 | 0.21  | 0.035 | 0.24 | 756  | 408 | 799  | 341 | 797  | 745  | 690  | 791  | 635.6 | 2538.6 | 4 | 0.0216 | 8.508 |

|                           |                                                                                                                                                                                                                    |                                     |     |      |          |     |                           |      |        |      |     |       |      |       |      |       |       |       |       |       |       |        |        |        |       |       |
|---------------------------|--------------------------------------------------------------------------------------------------------------------------------------------------------------------------------------------------------------------|-------------------------------------|-----|------|----------|-----|---------------------------|------|--------|------|-----|-------|------|-------|------|-------|-------|-------|-------|-------|-------|--------|--------|--------|-------|-------|
| Histone H2A type 2-C      | 1 H2A2C_BOVIN,sp A9UMV8 H2AJ_RAT,sp P02262 H2A1_RAT,sp P04908 H2A1B_HUMAN,sp P0C0S8 H2A1_HUMAN,sp P0C0S9 H2A1_BOVIN,sp P0C169 H2A1C_RAT,sp P0C170 H2A1E_RAT,sp P0CC09 H2A2A_RAT,sp P20671 H2A1D_HUMAN,sp P22752 H2 | VLIA<br>QGG<br>VLPN<br>IQAV<br>LLPK | 82% | 32.9 | 45.96179 | Ref | Value Missing (-1.150699) | 0.58 | 0.9881 | 0.46 | 0.6 | -0.25 | 0.2  | 119   | 9    | 165   | 187   | 180   | 104   | 142   | 847.2 | 2538.6 | 3      | 0.0167 | 6.576 |       |
| 60S ribosomal protein L35 | 8 RL35_RAT,sp P42766 RL35_HUMAN,sp Q29361 RL35_PIG,sp Q3MHM7 RL35_BOVIN,sp Q6ZVV7 RL35_MOUSE,tr D2H3W2 D2H3W2_AILME,tr D3Z942 D3Z942_RAT,tr D3ZN79 D3ZN79_RAT,tr E2RPE5 E2RPE5_CANFA,tr F1MDW8 F1MDW8_BOVIN,tr F   | VLTV<br>INQT<br>QK                  | 88% | 40.6 | 50.12635 | Ref | 0.2                       | 0.56 | 0.73   | 0.25 | 0.5 | 0.34  | 0.64 | 10500 | 9890 | 13800 | 17400 | 13700 | 14300 | 13300 | 16200 | 584.7  | 1751.1 | 3      | 0.019 | 10.86 |

|                                                                         |                                                                                                                                                                                                                    |              |     |      |          |     |      |      |      |      |      |      |      |      |      |       |       |       |       |       |       |       |        |   |        |       |
|-------------------------------------------------------------------------|--------------------------------------------------------------------------------------------------------------------------------------------------------------------------------------------------------------------|--------------|-----|------|----------|-----|------|------|------|------|------|------|------|------|------|-------|-------|-------|-------|-------|-------|-------|--------|---|--------|-------|
| 60S ribosomal protein L35<br>OS=Rattus norvegicus<br>GN=Rpl35 PE=1 SV=3 | 8 RL35_RAT,sp P42766 RL35_HUMAN,sp Q29361 RL35_PIG,sp Q3MHM7 R_L35_BOVIN,sp Q6ZVV7 RL35_MOUSE,tri D2H3W2 D2H3W2_AILME,tri D3Z942 D3Z942_RAT,tri D3Z942 D3Z942_RAT,tri E2RPE5 E2RPE5_CANFA,tri F1MDW8_BOVIN,tri FQk | vLTV<br>INQT | 95% | 50.3 | 50.00235 | Ref | 0.2  | 0.54 | 0.71 | 0.42 | 0.64 | 0.48 | 0.56 | 4260 | 5470 | 7540  | 9530  | 8590  | 8680  | 8140  | 8550  | 876.5 | 1751.1 | 2 | 0.0175 | 10.01 |
| 60S ribosomal protein L35<br>OS=Rattus norvegicus<br>GN=Rpl35 PE=1 SV=3 | 8 RL35_RAT,sp P42766 RL35_HUMAN,sp Q29361 RL35_PIG,sp Q3MHM7 R_L35_BOVIN,sp Q6ZVV7 RL35_MOUSE,tri D2H3W2 D2H3W2_AILME,tri D3Z942 D3Z942_RAT,tri E2RPE5 E2RPE5_CANFA,tri F1MDW8_BOVIN,tri FQk                       | vLTV<br>INQT | 90% | 42.3 | 50.14705 | Ref | 0.43 | 0.59 | 0.56 | 0.29 | 0.5  | 0.33 | 0.63 | 7690 | 8800 | 10700 | 11700 | 10700 | 10800 | 10100 | 12300 | 584.7 | 1751.1 | 3 | 0.0179 | 10.24 |



|                                                                         |                                                                                                                                                                                                                 |                                 |     |      |          |     |        |      |      |      |      |       |      |      |      |      |      |      |      |      |      |       |        |   |        |       |
|-------------------------------------------------------------------------|-----------------------------------------------------------------------------------------------------------------------------------------------------------------------------------------------------------------|---------------------------------|-----|------|----------|-----|--------|------|------|------|------|-------|------|------|------|------|------|------|------|------|------|-------|--------|---|--------|-------|
| 60S ribosomal protein L35<br>OS=Rattus norvegicus<br>GN=Rpl35 PE=1 SV=3 | 8 RL35_RAT,sp P42766 RL35_HUMAN,sp Q29361 RL35_PIG,sp Q3MHM7 RL35_BOVIN,sp Q62WV7 RL35_MOUSE, tr D2H3W2 D2H3W2_AILME, tr D3Z942 D3Z942_RAT, tr D3ZN79 D3ZN79_RAT, tr E2RPE5 E2RPE5_CANFA, tr F1MDW8_BOVIN, tr F | vLTV<br>INQT<br>Qk              | 94% | 43.9 | 50.00456 | Ref | 0.26   | 0.57 | 0.62 | 0.31 | 0.57 | 0.45  | 0.58 | 3520 | 3730 | 5030 | 5860 | 5210 | 5440 | 5230 | 5670 | 876.5 | 1751.1 | 2 | 0.0163 | 9.317 |
| Uncharacterized protein (Fragment)<br>OS=Canis familiaris<br>PE=3 SV=1  | tr F1PZK2 F1PZK2_CANFA                                                                                                                                                                                          | kIED<br>NNT<br>LVFI<br>VNV<br>k | 75% | 33.9 | 51.33753 | Ref | 0.3    | 0.48 | 0.34 | 0.54 | 0.83 | 0.11  | 0.96 | 1860 | 1970 | 2420 | 2460 | 3120 | 3340 | 2120 | 3770 | 665.4 | 2657.5 | 4 | 0.0428 | 16.11 |
| Uncharacterized protein (Fragment)<br>OS=Canis familiaris<br>PE=3 SV=1  | tr F1PZK2 F1PZK2_CANFA                                                                                                                                                                                          | kIED<br>NNT<br>LVFI<br>VNV<br>k | 64% | 32.1 | 50.17008 | Ref | -0.086 | 0.47 | 0.72 | 0.34 | 0.86 | 0.25  | 0.9  | 476  | 372  | 592  | 794  | 672  | 840  | 573  | 895  | 886.9 | 2657.6 | 3 | 0.0228 | 8.579 |
| Uncharacterized protein (Fragment)<br>OS=Canis familiaris<br>PE=3 SV=1  | tr F1PZK2 F1PZK2_CANFA                                                                                                                                                                                          | kIED<br>NNT<br>LVFI<br>VnVk     | 95% | 54.2 | 50.85951 | Ref | -0.16  | 0.36 | 0.75 | 0.42 | 1    | 0.089 | 1    | 1900 | 1770 | 2760 | 4050 | 3560 | 4700 | 2580 | 4950 | 887.2 | 2658.6 | 3 | 0.0171 | 6.426 |

|                                                                                            |                                                                                                                                             |                             |     |      |          |     |        |                                           |       |        |       |      |       |      |      |                                           |      |      |      |      |      |       |        |   |        |       |
|--------------------------------------------------------------------------------------------|---------------------------------------------------------------------------------------------------------------------------------------------|-----------------------------|-----|------|----------|-----|--------|-------------------------------------------|-------|--------|-------|------|-------|------|------|-------------------------------------------|------|------|------|------|------|-------|--------|---|--------|-------|
| Uncharacterized protein (Fragment)<br>OS=Canis familiaris<br>PE=3 SV=1                     | tr F1PZK2<br> F1PZK2_<br>CANFA                                                                                                              | kIED<br>nNTL<br>VFIV<br>nVk | 95% | 48   | 52.12914 | Ref | 0.053  | 0.36                                      | 0.6   | 0.38   | 0.72  | 0.28 | 1.1   | 585  | 532  | 716                                       | 950  | 899  | 993  | 761  | 1340 | 665.9 | 2659.5 | 4 | 0.0258 | 9.687 |
| Uncharacterized protein (Fragment)<br>OS=Ornithorhynchus anatinus<br>GN=TUSC3 PE=4<br>SV=1 | tr F6WYB<br>4 F6WYB<br>4_ORNAN<br>,tr F6WYT<br>4 F6WYT<br>4_ORNAN<br>,tr F6WY<br>U3 F6WY<br>U3_ORNA<br>N,tr F6W<br>YV3 F6W<br>YV3_ORN<br>AN | nLLA<br>Ek                  | 71% | 32.7 | 49.69961 | Ref | 0.44   | Value<br>Missi<br>ng (-<br>1.689<br>2284) | 0.009 | -0.079 | -0.07 | 0.68 | 0.18  | 493  | 558  | Value<br>Missi<br>ng (-<br>1.689<br>2284) | 505  | 523  | 459  | 809  | 566  | 517.8 | 1033.6 | 2 | 0.0111 | 10.76 |
| Uncharacterized protein (Fragment)<br>OS=Ornithorhynchus anatinus<br>GN=TUSC3 PE=4<br>SV=1 | tr F6WYB<br>4 F6WYB<br>4_ORNAN<br>,tr F6WYT<br>4 F6WYT<br>4_ORNAN<br>,tr F6WY<br>U3 F6WY<br>U3_ORNA<br>N,tr F6W<br>YV3 F6W<br>YV3_ORN<br>AN | nLLA<br>Ek                  | 92% | 41.5 | 50.02287 | Ref | 0.088  | Value<br>Missi<br>ng (-<br>1.093<br>7086) | 0.37  | 0.066  | -0.06 | 0.55 | 0.12  | 1630 | 1570 | Value<br>Missi<br>ng (-<br>1.093<br>7086) | 2320 | 2070 | 1660 | 2650 | 1950 | 517.8 | 1033.6 | 2 | 0.0014 | 1.376 |
| Uncharacterized protein (Fragment)<br>OS=Ornithorhynchus anatinus<br>GN=TUSC3 PE=4<br>SV=1 | tr F6WYB<br>4 F6WYB<br>4_ORNAN<br>,tr F6WYT<br>4 F6WYT<br>4_ORNAN<br>,tr F6WY<br>U3 F6WY<br>U3_ORNA<br>N,tr F6W<br>YV3 F6W<br>YV3_ORN<br>AN | nLLA<br>Ek                  | 92% | 41.5 | 49.98093 | Ref | -0.012 | Value<br>Missi<br>ng (-<br>1.079<br>4264) | 0.3   | 0.26   | -0.23 | 0.79 | 0.085 | 2250 | 2380 | Value<br>Missi<br>ng (-<br>1.079<br>4264) | 3580 | 3850 | 2390 | 5070 | 3090 | 517.8 | 1033.6 | 2 | 0.0033 | 3.154 |

|                                                                                            |                                                                                                                                                                                                                            |                           |     |      |          |     |      |                            |       |       |       |       |      |       |       |                            |       |       |       |       |       |       |        |   |        |       |
|--------------------------------------------------------------------------------------------|----------------------------------------------------------------------------------------------------------------------------------------------------------------------------------------------------------------------------|---------------------------|-----|------|----------|-----|------|----------------------------|-------|-------|-------|-------|------|-------|-------|----------------------------|-------|-------|-------|-------|-------|-------|--------|---|--------|-------|
| Uncharacterized protein (Fragment)<br>OS=Ornithorhynchus anatinus<br>GN=TUSC3 PE=4<br>SV=1 | tr F6WYB4 F6WYB4_ORNAN, tr F6WYT4 F6WYT4_ORNAN, tr F6WYU3 F6WYU3_ORNAN, tr F6WYV3 F6WYV3_ORNAN                                                                                                                             | nLLA<br>Ek                | 69% | 32.5 | 50.01379 | Ref | 0.56 | Value Missing (-1.7287935) | -0.14 | -0.45 | -0.11 | 0.91  | 0.03 | 865   | 999   | Value Missing (-1.7287935) | 748   | 669   | 736   | 1560  | 842   | 517.8 | 1033.6 | 2 | 0.0044 | 4.218 |
| 40S ribosomal protein S13<br>OS=Homo sapiens<br>GN=RPS13 PE=1<br>SV=2                      | 7 RS13_HUMAN,sp P62278 RS13_RAT,sp P62279 RS13_PIG,sp P62301 RS13_MOUSE,sp Q56JX8 RS13_BOVIN,sp Q9WVH0 RS13_CRI, tr D2HRK8 D2HRK8_AILME, tr E1BGR6 E1BGR6_BOVIN, tr E2QTJ2 E2QTJ2_CANFA, tr E7D091 E7D091_AILME, tr F6Q5P0 | kGLT<br>PSQI<br>GVIL<br>R | 70% | 30.5 | 47.35248 | Ref | 0.44 | 0.16                       | 0.41  | 0.18  | 0.43  | -0.04 | 0.28 | 11900 | 13300 | 11900                      | 15900 | 14900 | 15500 | 11700 | 14600 | 664.1 | 1989.2 | 3 | 0.0207 | 10.38 |

|                                                                       |                                                                                                                                                                                                                                                                                                                                 |                           |     |      |          |     |      |       |      |      |      |       |      |       |       |       |       |       |       |       |       |       |        |   |        |       |
|-----------------------------------------------------------------------|---------------------------------------------------------------------------------------------------------------------------------------------------------------------------------------------------------------------------------------------------------------------------------------------------------------------------------|---------------------------|-----|------|----------|-----|------|-------|------|------|------|-------|------|-------|-------|-------|-------|-------|-------|-------|-------|-------|--------|---|--------|-------|
| 40S ribosomal protein S13<br>OS=Homo sapiens<br>GN=RPS13 PE=1<br>SV=2 | 7 RS13_H<br>UMAN,sp<br> P62278 <br>RS13_RAT<br>,sp P6227<br>9 RS13_P<br>IG,sp P62<br>301 RS13<br>_MOUSE,<br>sp Q56JX<br>8 RS13_B<br>OVIN,sp <br>Q9WVH0 <br>RS13_CRI<br>GR,tr D2<br>HRK8 D2<br>HRK8_AIL<br>ME,tr E1<br>BGR6 E1<br>BGR6_BO<br>VIN,tr E2<br>QTJ2 E2Q<br>TJ2_CANF<br>A,tr E7D0<br>91 E7D09<br>1_AILME,t<br>r F6Q5PO | kGLT<br>PSQI<br>GVIL<br>R | 52% | 26.4 | 46.71941 | Ref | 0.39 | -0.02 | 0.48 | 0.13 | 0.57 | -0.06 | 0.33 | 15200 | 17000 | 13900 | 21900 | 19000 | 22500 | 15200 | 19800 | 664.1 | 1989.2 | 3 | 0.0146 | 7.354 |
| 40S ribosomal protein S13<br>OS=Homo sapiens<br>GN=RPS13 PE=1<br>SV=2 | 7 RS13_H<br>UMAN,sp<br> P62278 <br>RS13_RAT<br>,sp P6227<br>9 RS13_P<br>IG,sp P62<br>301 RS13<br>_MOUSE,<br>sp Q56JX<br>8 RS13_B<br>OVIN,sp <br>Q9WVH0 <br>RS13_CRI<br>GR,tr D2<br>HRK8 D2<br>HRK8_AIL<br>ME,tr E1<br>BGR6 E1<br>BGR6_BO<br>VIN,tr E2<br>QTJ2 E2Q<br>TJ2_CANF<br>A,tr E7D0<br>91 E7D09<br>1_AILME,t<br>r F6Q5PO | kGLT<br>PSQI<br>GVIL<br>R | 90% | 36.8 | 46.47755 | Ref | 0.48 | 0.18  | 0.53 | 0.13 | 0.29 | 0.16  | 0.3  | 2230  | 3080  | 2700  | 3880  | 3220  | 3140  | 3000  | 3300  | 498.3 | 1989.2 | 4 | 0.0108 | 5.407 |

|                                                                                 |                                                                                                                                                                                                                                                                                                                                                                   |                                              |            |             |                 |            |             |              |              |              |             |              |              |             |             |             |             |             |             |             |             |              |               |          |               |              |
|---------------------------------------------------------------------------------|-------------------------------------------------------------------------------------------------------------------------------------------------------------------------------------------------------------------------------------------------------------------------------------------------------------------------------------------------------------------|----------------------------------------------|------------|-------------|-----------------|------------|-------------|--------------|--------------|--------------|-------------|--------------|--------------|-------------|-------------|-------------|-------------|-------------|-------------|-------------|-------------|--------------|---------------|----------|---------------|--------------|
| <p>40S ribosomal protein S13<br/>OS=Homo sapiens<br/>GN=RPS13 PE=1<br/>SV=2</p> | <p>7 RS13_H<br/>UMAN,sp<br/> P62278 <br/>RS13_RAT<br/>,sp P6227<br/>9 RS13_P<br/>IG,sp P62<br/>301 RS13<br/>_MOUSE,<br/>sp Q56JX<br/>8 RS13_B<br/>OVIN,sp <br/>Q9WVH0 <br/>RS13_CRI<br/>GR,tr D2<br/>HRK8 D2<br/>HRK8_AIL<br/>ME,tr E1<br/>BGR6 E1<br/>BGR6_BO<br/>VIN,tr E2<br/>QTJ2 E2Q<br/>TJ2_CANF<br/>A,tr E7D0<br/>91 E7D09<br/>1_AILME,t<br/>r F6Q5PO</p>  | <p>kGLT<br/>PSQI<br/>GVIL<br/>R</p>          | <p>91%</p> | <p>36.9</p> | <p>46.1574</p>  | <p>Ref</p> | <p>0.45</p> | <p>0.19</p>  | <p>0.4</p>   | <p>0.01</p>  | <p>0.25</p> | <p>0.25</p>  | <p>0.4</p>   | <p>2590</p> | <p>3130</p> | <p>2830</p> | <p>3680</p> | <p>3090</p> | <p>3200</p> | <p>3330</p> | <p>3660</p> | <p>498.3</p> | <p>1989.2</p> | <p>4</p> | <p>0.0073</p> | <p>3.679</p> |
| <p>40S ribosomal protein SA OS=Ovis aries GN=RPSA PE=2 SV=1</p>                 | <p>8 RSSA_S<br/>HEEP,sp <br/>P08865 R<br/>SSA_HUM<br/>AN,sp P1<br/>4206 RSS<br/>A_MOUSE<br/>,sp P2645<br/>2 RSSA_B<br/>OVIN,sp <br/>P38982 R<br/>SSA_CRIG<br/>R,sp P389<br/>83 RSSA_<br/>RAT,sp Q<br/>2L9X0 RS<br/>SA_CHLAE<br/>,sp Q4G<br/>WZ2 RSS<br/>A_PIG,tr <br/>B0L419 B<br/>0L419_RA<br/>BIT,tr B2<br/>CY77 B2C<br/>Y77_MOU<br/>SE,tr B8K<br/>1X7 B8K1</p> | <p>aIVal<br/>ENP<br/>ADV<br/>SVIS<br/>SR</p> | <p>95%</p> | <p>66.9</p> | <p>53.44995</p> | <p>Ref</p> | <p>0.26</p> | <p>-0.31</p> | <p>0.027</p> | <p>-0.16</p> | <p>-0.2</p> | <p>-0.11</p> | <p>-0.14</p> | <p>1920</p> | <p>1850</p> | <p>1360</p> | <p>1920</p> | <p>1860</p> | <p>1580</p> | <p>1770</p> | <p>1710</p> | <p>1023</p>  | <p>2044.1</p> | <p>2</p> | <p>0.0051</p> | <p>2.493</p> |

|                                                          |                                                                                                                                                                                                                                                                           |   |     |      |          |     |      |       |       |        |       |       |       |      |      |      |      |      |      |      |      |       |        |   |        |       |
|----------------------------------------------------------|---------------------------------------------------------------------------------------------------------------------------------------------------------------------------------------------------------------------------------------------------------------------------|---|-----|------|----------|-----|------|-------|-------|--------|-------|-------|-------|------|------|------|------|------|------|------|------|-------|--------|---|--------|-------|
| 40S ribosomal protein SA OS=Ovis aries GN=RPSA PE=2 SV=1 | 8 RSSA_S<br>HEEP,sp <br>P08865 R<br>SSA_HUMAN,sp P14206 R<br>SSA_MOUSE,sp P26452 R<br>SSA_BOVIN,sp P38982 R<br>SSA_CRIGR,sp P38983 R<br>SSA_RAT,sp Q2L9X0 <br>SSA_CHLAE,sp Q4GWZ2 <br>SSA_PIG,tr B0L419 <br>B0L419_RA<br>BIT,tr B2CY77 <br>B2CY77 <br>MOU<br>SE,tr B8K1X7 | R | 95% | 58.4 | 53.70635 | Ref | 0.33 | -0.3  | 0.1   | -0.4   | -0.26 | -0.1  | 0.045 | 1890 | 2060 | 1450 | 2150 | 1670 | 1600 | 1870 | 2060 | 1002  | 2002   | 2 | 0.0111 | 5.535 |
| 40S ribosomal protein SA OS=Ovis aries GN=RPSA PE=2 SV=1 | 8 RSSA_S<br>HEEP,sp <br>P08865 R<br>SSA_HUMAN,sp P14206 R<br>SSA_MOUSE,sp P26452 R<br>SSA_BOVIN,sp P38982 R<br>SSA_CRIGR,sp P38983 R<br>SSA_RAT,sp Q2L9X0 <br>SSA_CHLAE,sp Q4GWZ2 <br>SSA_PIG,tr B0L419 <br>B0L419_RA<br>BIT,tr B2CY77 <br>B2CY77 <br>MOU<br>SE,tr B8K1X7 | R | 85% | 36.8 | 49.35517 | Ref | 0.34 | -0.18 | 0.021 | -0.074 | -0.18 | -0.15 | -0.18 | 7290 | 8810 | 6630 | 8580 | 8850 | 7200 | 7650 | 7450 | 608.9 | 1215.7 | 2 | 0.0097 | 8.001 |

|                                                                          |                                                                                                                                                                                                  |                             |     |      |          |     |      |       |       |       |       |       |       |      |      |      |      |      |      |      |      |       |        |   |        |       |
|--------------------------------------------------------------------------|--------------------------------------------------------------------------------------------------------------------------------------------------------------------------------------------------|-----------------------------|-----|------|----------|-----|------|-------|-------|-------|-------|-------|-------|------|------|------|------|------|------|------|------|-------|--------|---|--------|-------|
| T-complex protein 1 subunit beta<br>OS=Mus musculus<br>GN=Cct2 PE=1 SV=4 | 4 TCPB_MOUSE,sp Q3ZBH0 TCPB_BOVIN,sp Q5XIM9 TCPB_RAT, tr B6V9S9 B6V9S9_RABIT, tr DOG0C8 DOG0C8_PIG, tr D2HIW0 D2HIW0_AILME, tr E2QSH7 E2QSH7_CANFA, tr F6TK05 F6TK05_HORS E, tr F7CWM9 F7CWM9_CA | hGIN<br>cFIN<br>R           | 82% | 37.8 | 50.51897 | Ref | -0.1 | 0.047 | -0.06 | -0.4  | -0.21 | -0.16 | -0.11 | 7690 | 6230 | 7490 | 7800 | 6780 | 6760 | 7330 | 7520 | 475.2 | 1422.7 | 3 | 0.0063 | 4.449 |
| T-complex protein 1 subunit beta<br>OS=Mus musculus<br>GN=Cct2 PE=1 SV=4 | 4 TCPB_MOUSE,sp Q3ZBH0 TCPB_BOVIN,sp Q5XIM9 TCPB_RAT, tr B6V9S9 B6V9S9_RABIT, tr DOG0C8 DOG0C8_PIG, tr D2HIW0 D2HIW0_AILME, tr E2QSH7 E2QSH7_CANFA, tr F6TK05 F6TK05_HORS E, tr F7CWM9 F7CWM9_CA | ISSFI<br>GAIA<br>IGDL<br>Vk | 95% | 57.6 | 49.55135 | Ref | -0.2 | -0.21 | -0.01 | -0.16 | -0.27 | -0.46 | 0.072 | 618  | 410  | 443  | 570  | 567  | 457  | 419  | 603  | 704.8 | 2111.3 | 3 | 0.0088 | 4.161 |

|                                                                                                     |                                                                                                                                                                                                                           |                    |     |      |          |     |       |       |       |       |       |       |       |       |       |       |       |       |       |       |       |       |        |   |        |       |
|-----------------------------------------------------------------------------------------------------|---------------------------------------------------------------------------------------------------------------------------------------------------------------------------------------------------------------------------|--------------------|-----|------|----------|-----|-------|-------|-------|-------|-------|-------|-------|-------|-------|-------|-------|-------|-------|-------|-------|-------|--------|---|--------|-------|
| T-complex protein 1 subunit beta<br>OS=Mus musculus<br>GN=Cct2 PE=1 SV=4                            | 4 TCPB_MOUSE,sp Q3ZBH0 TCPB_BOVIN,sp Q5XIM9 TCPB_RAT, tr B6V9S9 B6V9S9_RABIT, tr DOG0C8 DOG0C8_PIG, tr D2HIW0 D2HIW0_AILME, tr E2QSH7 E2QSH7_CANFA, tr F1PGK7 F1PGK7_CANFA, tr F6TK05 F6TK05_HORSE, tr F7CWM9 F7CWM9_CA   | nIGV<br>DNP<br>AAk | 95% | 55.6 | 51.72833 | Ref | -0.23 | -0.22 | 0.078 | -0.22 | 0.095 | -0.23 | -0.28 | 17000 | 12600 | 13800 | 19100 | 17100 | 18600 | 15500 | 14900 | 804   | 1605.9 | 2 | 0.0064 | 4.006 |
| Activated RNA polymerase II transcriptional coactivator p15<br>OS=Homo sapiens<br>GN=SUB1 PE=1 SV=3 | 9 TCP4_HUMAN,sp Q4R947 TCP4_MACFA,sp Q5R6D0 TCP4_PONAB, tr D2HD87 D2HD87_AILME, tr E2R6X3 E2R6X3_CANFA, tr F2Z5D3 F2Z5D3_PIG, tr F6QR51 F6QR51_HORSE, tr F7AF44 F7AF44_MACMU, tr F7I1C7 F7I1C7_CALJA, tr Q59G24 Q59G24_HU | dDN<br>MFQ<br>IGk  | 95% | 51.5 | 52.29633 | Ref | -0.56 | 0.39  | -0.24 | 0.31  | 0.007 | 0.27  | -0.25 | 8730  | 5290  | 11100 | 8030  | 13000 | 9170  | 11500 | 7980  | 838.4 | 1674.9 | 2 | 0.0209 | 12.44 |



|                                                                                               |                                                                                                                                                                                                                                 |                                |     |      |          |     |       |      |       |      |       |      |       |       |       |       |       |       |       |       |       |       |        |   |        |       |
|-----------------------------------------------------------------------------------------------|---------------------------------------------------------------------------------------------------------------------------------------------------------------------------------------------------------------------------------|--------------------------------|-----|------|----------|-----|-------|------|-------|------|-------|------|-------|-------|-------|-------|-------|-------|-------|-------|-------|-------|--------|---|--------|-------|
| Activated RNA polymerase II transcriptional coactivator p15 OS=Homo sapiens GN=SUB1 PE=1 SV=3 | 9 TCP4_HUMAN,sp Q4R947 TCP4_MA CFA,sp Q5R6D0 TCP4_PONA B,tr D2H D87 D2H D87_AIL ME,tr E2 R6X3 E2R 6X3_CAN FA,tr F2Z 5D3 F2Z5 D3_PIG,tr F6QR51 F6QR51_HORSE,tr F7AF44 F7AF44_MACMU,tr F711C7 F711C7_CALJ A,tr Q59 G24 Q59 G24_HU | eQIS<br>DIDD<br>AVR            | 94% | 46   | 51.50634 | Ref | -0.87 | 0.4  | -0.3  | 0.3  | 0.19  | 0.11 | -0.14 | 43100 | 19100 | 49900 | 34500 | 57900 | 46500 | 46100 | 38400 | 782.9 | 1563.8 | 2 | 0.0161 | 10.28 |
| Activated RNA polymerase II transcriptional coactivator p15 OS=Homo sapiens GN=SUB1 PE=1 SV=3 | 9 TCP4_HUMAN,sp Q4R947 TCP4_MA CFA,sp Q5R6D0 TCP4_PONA B,tr D2H D87 D2H D87_AIL ME,tr E2 R6X3 E2R 6X3_CAN FA,tr F2Z 5D3 F2Z5 D3_PIG,tr F6QR51 F6QR51_HORSE,tr F7AF44 F7AF44_MACMU,tr F711C7 F711C7_CALJ A,tr Q59 G24 Q59 G24_HU | eYW<br>MDP<br>EGE<br>MkP<br>GR | 75% | 37.3 | 52.74424 | Ref | -0.48 | 0.18 | -0.25 | 0.26 | 0.078 | 0.22 | -0.02 | 8570  | 5350  | 9170  | 7640  | 12000 | 9210  | 10600 | 8930  | 778.4 | 2332.1 | 3 | 0.0218 | 9.334 |

|                                                                                   |                                                                                                                                                                                                                                   |                                                  |     |      |          |     |       |       |       |        |       |       |       |      |      |      |      |      |      |      |      |       |        |   |        |       |
|-----------------------------------------------------------------------------------|-----------------------------------------------------------------------------------------------------------------------------------------------------------------------------------------------------------------------------------|--------------------------------------------------|-----|------|----------|-----|-------|-------|-------|--------|-------|-------|-------|------|------|------|------|------|------|------|------|-------|--------|---|--------|-------|
| 26S proteasome non-ATPase regulatory subunit 4 OS=Homo sapiens GN=PSMD4 PE=1 SV=1 | 6 PSMD4_HUMAN, tr A7UHZ2 A7UHZ2_SHEEP, tr A9X198 A9X198_PAPAN, tr B0KWB9 B0KWB9_CALJA, tr B1MTG0 B1MTG0_CALMO, tr F1SSZ6 F1SSZ6_PI G, tr F1SSZ7 F1SSZ7_PIG, tr F7CW85 F7CW85_MACMU, tr F7HNP3 F7HNP3_MACMU, tr Q32YV9 Q32YV9_k    | aAA<br>ASA<br>AEA<br>GIAT<br>TGTE<br>DSD<br>DALL | 95% | 119  | 55.49559 | Ref | -0.06 | 0.12  | -0.07 | 0.018  | 0.062 | -0.05 | -0.05 | 920  | 815  | 1000 | 985  | 1150 | 1040 | 1000 | 996  | 976.8 | 2927.5 | 3 | 0.0096 | 3.288 |
| 26S proteasome non-ATPase regulatory subunit 4 OS=Homo sapiens GN=PSMD4 PE=1 SV=1 | 6 PSMD4_HUMAN, tr A7UHZ2 A7UHZ2_SHEEP, tr A9X198 A9X198_PAPAN, tr B0KWB9 B0KWB9_CALJA, tr B1MTG0 B1MTG0_CALMO, tr F1SSZ6 F1SSZ6_PI G, tr F1SSZ7 F1SSZ7_PIG, tr F7CW85 F7CW85_MACMU, tr F7HNP3 F7HNP3_MACMU, tr Q32YV9 Q32YV9_cHSK | IQAQ<br>QDA<br>VNIV<br>cHSK                      | 95% | 62.7 | 54.49883 | Ref | 0.16  | -0.25 | 0.076 | -0.036 | 0.11  | -0.16 | -0.06 | 1360 | 1310 | 1070 | 1510 | 1540 | 1480 | 1280 | 1370 | 770.1 | 2307.2 | 3 | 0.0163 | 7.076 |

|                                                                                   |                                                                                                                                                                                                                              |                                      |     |      |          |     |                             |                            |       |        |                            |                            |       |       |                             |                            |       |       |                            |                            |       |       |        |   |        |       |
|-----------------------------------------------------------------------------------|------------------------------------------------------------------------------------------------------------------------------------------------------------------------------------------------------------------------------|--------------------------------------|-----|------|----------|-----|-----------------------------|----------------------------|-------|--------|----------------------------|----------------------------|-------|-------|-----------------------------|----------------------------|-------|-------|----------------------------|----------------------------|-------|-------|--------|---|--------|-------|
| 26S proteasome non-ATPase regulatory subunit 4 OS=Homo sapiens GN=PSMD4 PE=1 SV=1 | 6 PSMD4_HUMAN, tr A7UHZ2 A7UHZ2_SHEEP, tr A9X198 A9X198_PAPAN, tr B0KWB9 B0KWB9_CALJA, tr B1MTG0 B1MTG0_CALMO, tr F1SSZ6 F1SSZ6_PI G, tr F1SSZ7 F1SSZ7_PIG, tr F7CW85 F7CW85_MACMU, tr F7HNP3 F7HNP3_MACMU, tr Q32YV9 Q32YV9 | mTIS QQE FGR                         | 70% | 33.9 | 51.30482 | Ref | 0.11                        | -0.22                      | 0.027 | -0.024 | 0.14                       | -0.25                      | 0.062 | 30500 | 28700                       | 24700                      | 32900 | 35000 | 34300                      | 27200                      | 33600 | 750.9 | 1499.8 | 2 | 0.0113 | 7.543 |
| Uncharacterized protein OS=Bos taurus PE=4 SV=1                                   | tr F1N1S2 F1N1S2_BOVIN                                                                                                                                                                                                       | aVLD ALLE Gk                         | 65% | 32   | 49.92739 | Ref | -0.13                       | -0.11                      | 0.089 | 0.005  | -0.4                       | -0.51                      | -0.13 | 3690  | 4230                        | 4660                       | 6000  | 6240  | 4120                       | 3980                       | 5160  | 546.3 | 1636   | 3 | 0.0018 | 1.11  |
| Uncharacterized protein OS=Bos taurus PE=4 SV=1                                   | tr F1N1S2 F1N1S2_BOVIN                                                                                                                                                                                                       | kTD DVE DMS SQA GLTL DER             | 95% | 62.8 | 54.59319 | Ref | -0.85                       | -0.28                      | -0.03 | 0.06   | -0.32                      | -0.34                      | -0.03 | 3090  | 1490                        | 2400                       | 3200  | 3760  | 2520                       | 2610                       | 3210  | 906.8 | 2717.3 | 3 | 0.0186 | 6.849 |
| Uncharacterized protein OS=Bos taurus PE=4 SV=1                                   | tr F1N1S2 F1N1S2_BOVIN                                                                                                                                                                                                       | tAEA AAA ALGT VAA AAA VAG LATT GPA k | 95% | 88.2 | 52.84293 | Ref | Value Missing (-0.96048534) | Value Missing (-1.0781786) | 0.24  | 0.23   | Value Missing (-1.1893802) | Value Missing (-1.2521471) | 0.31  | 137   | Value Missing (-0.96048534) | Value Missing (-1.0781786) | 111   | 122   | Value Missing (-1.1893802) | Value Missing (-1.2521471) | 116   | 992.6 | 2974.7 | 3 | 0.0055 | 1.847 |

|                                                                        |                                                                                                                                                                                                                         |                                   |     |      |          |     |       |       |       |        |       |       |       |       |       |       |       |       |       |       |       |       |        |   |        |       |
|------------------------------------------------------------------------|-------------------------------------------------------------------------------------------------------------------------------------------------------------------------------------------------------------------------|-----------------------------------|-----|------|----------|-----|-------|-------|-------|--------|-------|-------|-------|-------|-------|-------|-------|-------|-------|-------|-------|-------|--------|---|--------|-------|
| Uncharacterized protein OS=Bos taurus PE=4 SV=1                        | tr E1BBH3 E1BBH3_BOVIN                                                                                                                                                                                                  | hELT<br>EIST<br>VDV<br>ETQP<br>Gk | 77% | 40.2 | 54.92956 | Ref | -0.17 | -0.08 | -0.4  | -0.075 | 0.15  | -0.19 | -0.16 | 4600  | 2990  | 3430  | 3090  | 4280  | 4360  | 3590  | 3660  | 831.1 | 2490.3 | 3 | 0.0203 | 8.151 |
| Uncharacterized protein OS=Bos taurus PE=4 SV=1                        | tr E1BBH3 E1BBH3_BOVIN                                                                                                                                                                                                  | iSM<br>QDV<br>DLSL<br>GSSK        | 91% | 47.9 | 54.1668  | Ref | -0.2  | -0.1  | -0.03 | -0.024 | 0.032 | -0.21 | -0.07 | 21400 | 16300 | 18900 | 22300 | 24600 | 22300 | 19700 | 21500 | 696.7 | 2087.1 | 3 | 0.0186 | 8.914 |
| Uncharacterized protein OS=Bos taurus PE=4 SV=1                        | tr E1BBH3 E1BBH3_BOVIN                                                                                                                                                                                                  | vGSP<br>GVS<br>VnAk               | 95% | 49.9 | 51.80467 | Ref | -0.37 | -0.07 | -0.06 | 0.15   | 0.18  | -0.36 | -0.11 | 11200 | 7660  | 10200 | 11500 | 14700 | 13100 | 9390  | 11100 | 812.5 | 1622.9 | 2 | 0.0094 | 5.773 |
| Proteasome subunit alpha type-1 OS=Rattus norvegicus GN=Psm1 PE=1 SV=2 | 0 PSA1_RAT,sp P25786 PSA1_HUMAN,sp Q3T0X5 PSA1_BOVIN,sp Q4R3H2 PSA1_MACFA,sp Q5REN2 PSA1_PONAB,sp Q9R1P4 PSA1_MOUSE,tr E2R767 E2R767_CANFA,tr E9Q3B7 E9Q3B7_MOUSE,tr F1P8D6 F1P8D6_CANFA,tr F2Z5L7 F2Z5L7_PIG,tr F6WZWR | aDEP<br>MEH                       | 95% | 55.2 | 44.88903 | Ref | 0.24  | -0.43 | -0.06 | -0.34  | 0.12  | -0.56 | -0.21 | 17600 | 17400 | 11900 | 17200 | 15600 | 18700 | 12200 | 15500 | 566.8 | 1131.5 | 2 | 0.0094 | 8.281 |

|                                                                        |                                                                                                                                                                                                                               |                          |     |      |          |     |      |       |       |       |       |       |       |      |       |      |      |      |      |      |      |       |        |   |        |       |
|------------------------------------------------------------------------|-------------------------------------------------------------------------------------------------------------------------------------------------------------------------------------------------------------------------------|--------------------------|-----|------|----------|-----|------|-------|-------|-------|-------|-------|-------|------|-------|------|------|------|------|------|------|-------|--------|---|--------|-------|
| Proteasome subunit alpha type-1 OS=Rattus norvegicus GN=Psm1 PE=1 SV=2 | 0 PSA1_R AT,sp P25786 PSA1_HUMAN,sp Q3T0X5 PSA1_BOVIN,sp Q4R3H2 PSA1_MACFA,sp Q5REN2 PSA1_PONAB,sp Q9R1P4 PSA1_MOUSE, tr E2R767 E2R767_CANFA, tr E9Q3B7 E9Q3B7_MOUSE, tr F1P8D6 F1P8D6_CANFA, tr F2Z5L7 F2Z5L7_PIG, tr F6WZWK | eTLP<br>AEQ<br>DLTT      | 61% | 35   | 53.73182 | Ref | 0.3  | -0.25 | -0.09 | -0.4  | -0.19 | -0.26 | -0.23 | 9920 | 10600 | 7850 | 9890 | 8780 | 8880 | 8830 | 8920 | 652   | 1953.1 | 3 | 0.0133 | 6.799 |
| Proteasome subunit alpha type-1 OS=Rattus norvegicus GN=Psm1 PE=1 SV=2 | 0 PSA1_R AT,sp P25786 PSA1_HUMAN,sp Q3T0X5 PSA1_BOVIN,sp Q4R3H2 PSA1_MACFA,sp Q5REN2 PSA1_PONAB,sp Q9R1P4 PSA1_MOUSE, tr E2R767 E2R767_CANFA, tr E9Q3B7 E9Q3B7_MOUSE, tr F1P8D6 F1P8D6_CANFA, tr F2Z5L7 F2Z5L7_PIG, tr F6WZWK | iHQI<br>EYA<br>MEA<br>Vk | 95% | 54.6 | 53.70855 | Ref | 0.21 | -0.35 | -0    | -0.26 | -0.04 | -0.26 | -0.14 | 1390 | 1650  | 1210 | 1730 | 1600 | 1620 | 1460 | 1570 | 680.7 | 2039.1 | 3 | 0.0074 | 3.649 |

|                                                                 |                                                                                                                                                                                                                                     |                                 |     |      |          |     |       |       |       |       |       |       |       |      |      |      |      |      |      |      |      |       |        |   |        |       |
|-----------------------------------------------------------------|-------------------------------------------------------------------------------------------------------------------------------------------------------------------------------------------------------------------------------------|---------------------------------|-----|------|----------|-----|-------|-------|-------|-------|-------|-------|-------|------|------|------|------|------|------|------|------|-------|--------|---|--------|-------|
| Splicing factor 3B subunit 2 OS=Homo sapiens GN=SF3B2 PE=1 SV=2 | 5 SF3B2_HUMAN, tr A4FV01 A4FV01_BOVIN, tr D2H4M9 D2H4M9_AILME, tr D3ZJX7 D3ZJX7_RA T, tr D3Z MS1 D3Z MS1_RAT, tr E1BBQ7 E1BBQ7_BOVIN, tr E2RL65 E2RL65_C ANFA, tr E9PPJO E9PPJO_HUMAN, tr F1MC31 F1MC31_BOVIN, tr F1RU38 F1RU38_PIG | gPPP<br>PPG<br>DEN<br>R         | 95% | 60.5 | 50.71672 | Ref | -0.17 | -0.06 | -0.19 | -0.42 | -0.18 | -0.57 | -0.29 | 9760 | 6560 | 7640 | 7850 | 7390 | 7620 | 6060 | 7300 | 718.9 | 1435.7 | 2 | 0.0137 | 9.504 |
| Splicing factor 3B subunit 2 OS=Homo sapiens GN=SF3B2 PE=1 SV=2 | 5 SF3B2_HUMAN, tr A4FV01 A4FV01_BOVIN, tr D2H4M9 D2H4M9_AILME, tr D3ZJX7 D3ZJX7_RA T, tr D3Z MS1 D3Z MS1_RAT, tr E1BBQ7 E1BBQ7_BOVIN, tr E2RL65 E2RL65_C ANFA, tr E9PPJO E9PPJO_HUMAN, tr F1MC31 F1MC31_BOVIN, tr F1RU38 F1RU38_PIG | IAQQ<br>QAA<br>LLM<br>QQE<br>ER | 95% | 52.9 | 54.16181 | Ref | 0.16  | -0.29 | -0.4  | -0.23 | -0.34 | -0.1  | -0.32 | 1960 | 2070 | 1640 | 1710 | 2110 | 1710 | 2110 | 1800 | 687.7 | 2060.1 | 3 | 0.0125 | 6.066 |

|                                                                 |                                                                                                                                                                                                                                  |                    |     |      |          |     |       |       |       |        |      |       |       |       |       |       |       |       |       |       |       |       |        |   |        |       |
|-----------------------------------------------------------------|----------------------------------------------------------------------------------------------------------------------------------------------------------------------------------------------------------------------------------|--------------------|-----|------|----------|-----|-------|-------|-------|--------|------|-------|-------|-------|-------|-------|-------|-------|-------|-------|-------|-------|--------|---|--------|-------|
| Splicing factor 3B subunit 2 OS=Homo sapiens GN=SF3B2 PE=1 SV=2 | 5 SF3B2_HUMAN, tr A4FV01 A4FV01_BOVIN, tr D2H4M9 D2H4M9_AILME, tr D3ZJX7 D3ZJX7_RA T, tr D3ZMS1 D3ZMS1_RAT, tr E1BBQ7 E1BBQ7_BOVIN, tr E2RL65 E2RL65_CANFA, tr E9PPJO E9PPJO_HUMAN, tr F1MC31 F1MC31_BOVIN, tr F1RU38 F1RU38_PIG | ILVH Lk            | 61% | 20.8 | 39.42703 | Ref | -0.28 | -0.2  | -0.37 | -0.28  | -0.1 | -0.41 | 0.024 | 35100 | 25100 | 28900 | 28900 | 33800 | 33400 | 28100 | 37700 | 444.3 | 1329.9 | 3 | 0.0034 | 2.556 |
| Deoxyuridine triphosphatase OS=Bos taurus GN=DUT PE=2 SV=1      | tr Q2NKU1 Q2NKU1_BOVIN                                                                                                                                                                                                           | aTEA GDM R         | 56% | 27.7 | 47.66264 | Ref | 0.41  | -1.3  | 0.27  | 0.1    | 0.55 | -1.6  | 0.23  | 3140  | 3150  | 1010  | 3480  | 3410  | 4060  | 963   | 3380  | 585.8 | 1169.6 | 2 | 0.0055 | 4.674 |
| Deoxyuridine triphosphatase OS=Bos taurus GN=DUT PE=2 SV=1      | tr Q2NKU1 Q2NKU1_BOVIN                                                                                                                                                                                                           | gNV GVV LFNF Gk    | 95% | 55.8 | 52.06081 | Ref | 0.16  | -0.53 | 0.4   | -0.048 | 0.26 | -0.52 | 0.18  | 4460  | 4340  | 2910  | 6210  | 5030  | 5440  | 3300  | 5310  | 620.4 | 1858.1 | 3 | 0.0115 | 6.192 |
| Deoxyuridine triphosphatase OS=Bos taurus GN=DUT PE=2 SV=1      | tr Q2NKU1 Q2NKU1_BOVIN                                                                                                                                                                                                           | hFID VGA GVID EDYR | 95% | 59.4 | 52.85404 | Ref | 0.21  | -0.38 | 0.12  | -0.072 | 0.17 | -0.1  | 0.37  | 6820  | 8440  | 6110  | 9680  | 9340  | 9610  | 8360  | 11500 | 670.7 | 2009   | 3 | 0.0132 | 6.55  |

|                                                                    |                                                                                                         |                                                |     |      |          |     |       |       |       |        |       |       |       |      |       |      |       |      |       |      |      |       |        |   |        |       |
|--------------------------------------------------------------------|---------------------------------------------------------------------------------------------------------|------------------------------------------------|-----|------|----------|-----|-------|-------|-------|--------|-------|-------|-------|------|-------|------|-------|------|-------|------|------|-------|--------|---|--------|-------|
| Phosphoserine phosphatase<br>OS=Bos taurus<br>GN=PSPH PE=2<br>SV=1 | sp Q2KH<br>U0 SERB_ BOVIN, tr <br>D0G7E3 <br>D0G7E3_ PIG, tr F1<br>RIU1 F1RI<br>U1_PIG                  | fcGV<br>EDA<br>VSE<br>MTR                      | 95% | 47.8 | 47.17513 | Ref | -0.21 | -0.52 | -0.35 | -0.19  | -0.37 | -0.41 | -0.3  | 2960 | 2470  | 2170 | 2730  | 3360 | 2600  | 2640 | 2830 | 897.4 | 1792.8 | 2 | 0.0165 | 9.177 |
| Phosphoserine phosphatase<br>OS=Bos taurus<br>GN=PSPH PE=2<br>SV=1 | sp Q2KH<br>U0 SERB_ BOVIN, tr <br>D0G7E3 <br>D0G7E3_ PIG, tr F1<br>RIU1 F1RI<br>U1_PIG                  | fYFn<br>GEY<br>AGF<br>DET<br>QPT<br>AES<br>GGk | 86% | 41.9 | 52.69256 | Ref | -0.1  | -0.39 | -0.5  | -0.31  | -0.17 | -0.6  | -0.5  | 1330 | 1070  | 956  | 990   | 1240 | 1200  | 931  | 989  | 1009  | 3023.4 | 3 | 0.0182 | 6.031 |
| Phosphoserine phosphatase<br>OS=Bos taurus<br>GN=PSPH PE=2<br>SV=1 | sp Q2KH<br>U0 SERB_ BOVIN, tr <br>D0G7E3 <br>D0G7E3_ PIG, tr F1<br>RIU1 F1RI<br>U1_PIG                  | nVQ<br>VFLI<br>SGG<br>FR                       | 84% | 39.3 | 52.54151 | Ref | -0.34 | -0.38 | -0.3  | -0.36  | -0.56 | -0.31 | -0.61 | 5360 | 3130  | 3290 | 3910  | 4120 | 3150  | 3900 | 3140 | 821   | 1639.9 | 2 | 0.0105 | 6.378 |
| Annexin A3 OS=Bos taurus<br>GN=ANXA3<br>PE=2 SV=3                  | sp Q3SW<br>X7 ANXA<br>3_BOVIN,<br>tr F1MJW<br>6 F1MJW<br>6_BOVIN,<br>tr F1MW<br>Q2 F1M<br>WQ2_BO<br>VIN | aLLIL<br>AnG<br>RR                             | 90% | 40.4 | 48.37317 | Ref | 0.4   | -0.08 | 0.28  | -0.018 | 0.16  | -0.35 | 0.049 | 4590 | 5260  | 4090 | 5910  | 5290 | 5210  | 3830 | 5020 | 468   | 1400.9 | 3 | 0.0066 | 4.74  |
| Annexin A3 OS=Bos taurus<br>GN=ANXA3<br>PE=2 SV=3                  | sp Q3SW<br>X7 ANXA<br>3_BOVIN,<br>tr F1MJW<br>6 F1MJW<br>6_BOVIN,<br>tr F1MW<br>Q2 F1M<br>WQ2_BO<br>VIN | sEID<br>LLDI<br>R                              | 77% | 36.7 | 52.23626 | Ref | 0.56  | -0.41 | 0.31  | -0.11  | 0.22  | -0.31 | 0.12  | 8070 | 11100 | 6090 | 11300 | 9320 | 10200 | 7400 | 9860 | 689.4 | 1376.8 | 2 | 0.0133 | 9.643 |



|                                                   |                                                                       |                    |     |      |          |     |        |       |       |        |       |       |       |      |      |      |      |      |      |      |       |       |        |   |        |       |
|---------------------------------------------------|-----------------------------------------------------------------------|--------------------|-----|------|----------|-----|--------|-------|-------|--------|-------|-------|-------|------|------|------|------|------|------|------|-------|-------|--------|---|--------|-------|
| Annexin A3 OS=Bos taurus GN=ANXA3 PE=2 SV=3       | sp Q3SWX7 ANXA3_BOVIN, tr F1MJW6 F1MJW6_BOVIN, tr F1MWQ2 F1MWQ2_BOVIN | sLGD EISSE TSG DFR | 95% | 48.2 | 50.69494 | Ref | 0.53   | -0.69 | 0.46  | -0.032 | 0.19  | -0.9  | 0.15  | 7920 | 8310 | 3900 | 9690 | 7580 | 7710 | 3800 | 7800  | 952.5 | 1902.9 | 2 | 0.0111 | 5.821 |
| Thrombospondin-1 OS=Bos taurus GN=THBS1 PE=2 SV=2 | sp Q28178 TSP1_BOVIN, tr F1N3A1 F1N3A1_BOVIN                          | aQG YSGL SVk       | 95% | 61.5 | 52.59113 | Ref | -0.72  | 0.28  | -0.19 | 0.12   | -0.66 | 0.79  | -0.07 | 5220 | 2680 | 5790 | 4690 | 6410 | 3260 | 9340 | 5080  | 809.5 | 1616.9 | 2 | 0.0238 | 14.7  |
| Thrombospondin-1 OS=Bos taurus GN=THBS1 PE=2 SV=2 | sp Q28178 TSP1_BOVIN, tr F1N3A1 F1N3A1_BOVIN                          | dNc QYV YNV DQk    | 87% | 40.9 | 51.38132 | Ref | -0.081 | 0.35  | -0.13 | -0.019 | -0.2  | 0.23  | -0.05 | 7970 | 6550 | 9610 | 7700 | 9170 | 7050 | 9930 | 8110  | 715   | 2142   | 3 | 0.025  | 11.65 |
| Thrombospondin-1 OS=Bos taurus GN=THBS1 PE=2 SV=2 | sp Q28178 TSP1_BOVIN, tr F1N3A1 F1N3A1_BOVIN                          | gFLL LASL R        | 72% | 31.1 | 47.97538 | Ref | -0.47  | 0.27  | -0.02 | -0.13  | -0.99 | 1     | -0.43 | 1640 | 1030 | 1870 | 1720 | 1750 | 842  | 3570 | 1290  | 647.4 | 1292.8 | 2 | 0.0094 | 7.251 |
| Protein CASC3 OS=Bos taurus GN=CASC3 PE=2 SV=1    | sp A5D7H5 CASC3_BOVIN, tr E2R5K5 E2R5K5_CAFNA                         | aGAL HLR           | 89% | 39.5 | 48.47498 | Ref | -0.088 | -0.01 | 0.32  | -0.25  | 0.6   | -0.42 | -0.29 | 3540 | 2900 | 3320 | 4670 | 3470 | 5450 | 2820 | 3050  | 347.9 | 1040.6 | 3 | 0.0129 | 12.37 |
| Protein CASC3 OS=Bos taurus GN=CASC3 PE=2 SV=1    | sp A5D7H5 CASC3_BOVIN, tr E2R5K5 E2R5K5_CAFNA                         | gLFF EHDL R        | 83% | 39.4 | 51.9656  | Ref | -0.2   | 0.037 | 0.063 | -0.56  | -0.01 | -0.53 | 0.57  | 2960 | 1710 | 2190 | 2500 | 1790 | 2300 | 1670 | 3540  | 479.9 | 1436.8 | 3 | 0.0115 | 7.993 |
| Protein CASC3 OS=Bos taurus GN=CASC3 PE=2 SV=1    | sp A5D7H5 CASC3_BOVIN, tr E2R5K5 E2R5K5_CAFNA                         | kGLF FEH DLR       | 90% | 42.7 | 53.03989 | Ref | -0.078 | -0.01 | -0.05 | -0.25  | 0.38  | -0.65 | 0.55  | 6520 | 5640 | 6410 | 6990 | 6710 | 9060 | 4640 | 10600 | 468.3 | 1869   | 4 | 0.0231 | 12.34 |

|                                                                                 |                                                                                                                                                                                                              |                                |     |      |          |     |        |       |       |        |       |       |       |       |       |       |       |       |       |       |       |       |        |   |        |       |
|---------------------------------------------------------------------------------|--------------------------------------------------------------------------------------------------------------------------------------------------------------------------------------------------------------|--------------------------------|-----|------|----------|-----|--------|-------|-------|--------|-------|-------|-------|-------|-------|-------|-------|-------|-------|-------|-------|-------|--------|---|--------|-------|
| 26S proteasome non-ATPase regulatory subunit 9 OS=Bos taurus GN=PSMD9 PE=1 SV=1 | sp Q3SZ19 PSMD9_BOVIN,transcript C3V9V8 C3V9V8_BOVIN                                                                                                                                                         | dQS<br>QGL<br>SPA<br>QAF<br>Ak | 95% | 55.3 | 54.15256 | Ref | -0.35  | -0.38 | -0.04 | -0.073 | 0.24  | -0.59 | 0.051 | 23600 | 15300 | 16200 | 23100 | 24800 | 26900 | 15900 | 24500 | 686   | 2055.1 | 3 | 0.0222 | 10.77 |
| 26S proteasome non-ATPase regulatory subunit 9 OS=Bos taurus GN=PSMD9 PE=1 SV=1 | sp Q3SZ19 PSMD9_BOVIN,transcript C3V9V8 C3V9V8_BOVIN                                                                                                                                                         | hNIV<br>cLQN<br>Dhk            | 70% | 36.8 | 53.55827 | Ref | -0.039 | -0.29 | -0.09 | -0.25  | 0.12  | -0.46 | 0.029 | 11900 | 10100 | 9150  | 11800 | 11700 | 13200 | 9190  | 12800 | 659   | 1974   | 3 | 0.0215 | 10.88 |
| 26S proteasome non-ATPase regulatory subunit 9 OS=Bos taurus GN=PSMD9 PE=1 SV=1 | sp Q3SZ19 PSMD9_BOVIN,transcript C3V9V8 C3V9V8_BOVIN                                                                                                                                                         | qVE<br>DAL<br>HQL<br>HAR       | 86% | 40.6 | 53.45184 | Ref | -0.029 | -0.38 | 0.1   | -0.29  | 0.2   | -0.13 | -0.09 | 6370  | 7070  | 6000  | 9450  | 7950  | 9700  | 8060  | 8240  | 431   | 1719.9 | 4 | 0.0082 | 4.758 |
| EMILIN-1 OS=Homo sapiens GN=EMILIN1 PE=1 SV=2                                   | sp Q9Y6C2 EMIL1_HUMAN,transcript D3Z9E1 D3Z9E1_RAT,transcript E1BLS8 E1BLS8_BOVIN,transcript E2RCF2 E2RCF2_CANFA,transcript F1SDQ5 F1SDQ5_PIG,transcript F6SMZ4 F6SMZ4_HO RSE,transcript F7GPS2 F7GPS2_MACMU | rLDV<br>VAG<br>SVTV<br>LSGR    | 95% | 52.9 | 51.80622 | Ref | 0.28   | 0.35  | 0.056 | -0.01  | -0.11 | 0.27  | 0.052 | 4090  | 4310  | 4910  | 4500  | 4740  | 3850  | 5260  | 4480  | 611.7 | 1832.1 | 3 | 0.0118 | 6.45  |

|                                                                      |                                                                                                                                     |                          |     |      |          |     |       |       |                                           |       |       |       |       |       |      |       |                                          |       |       |       |       |       |        |   |        |       |
|----------------------------------------------------------------------|-------------------------------------------------------------------------------------------------------------------------------------|--------------------------|-----|------|----------|-----|-------|-------|-------------------------------------------|-------|-------|-------|-------|-------|------|-------|------------------------------------------|-------|-------|-------|-------|-------|--------|---|--------|-------|
| SAFB protein<br>OS=Bos taurus<br>GN=SAFB PE=2<br>SV=1                | tr A5PJP2<br> A5PJP2_<br>BOVIN,tr <br>E1B9I2 E<br>1B9I2_BO<br>VIN,tr E1<br>BDE7 E1B<br>DE7_BOVI<br>N,tr E1BG<br>66 E1BG6<br>6_BOVIN | eSSA<br>SEG<br>ADQ<br>k  | 95% | 50   | 52.05071 | Ref | -0.45 | -0.32 | -0.93                                     | -0.38 | -0.31 | -0.49 | -0.16 | 14000 | 9130 | 10800 | 7980                                     | 12900 | 11800 | 10900 | 13600 | 858.9 | 1715.9 | 2 | 0.0177 | 10.29 |
| SAFB protein<br>OS=Bos taurus<br>GN=SAFB PE=2<br>SV=1                | tr A5PJP2<br> A5PJP2_<br>BOVIN,tr <br>E1B9I2 E<br>1B9I2_BO<br>VIN,tr E1<br>BDE7 E1B<br>DE7_BOVI<br>N,tr E1BG<br>66 E1BG6<br>6_BOVIN | rEPV<br>EQT<br>GDD<br>ER | 95% | 47   | 50.69142 | Ref | -0.19 | 0.091 | -1.2                                      | -0.52 | -0.38 | -0.41 | -0.76 | 735   | 550  | 726   | 345                                      | 588   | 565   | 578   | 450   | 867.9 | 1733.8 | 2 | 0.0123 | 7.09  |
| SAFB protein<br>OS=Bos taurus<br>GN=SAFB PE=2<br>SV=1                | tr A5PJP2<br> A5PJP2_<br>BOVIN,tr <br>E1B9I2 E<br>1B9I2_BO<br>VIN,tr E1<br>BDE7 E1B<br>DE7_BOVI<br>N,tr E1BG<br>66 E1BG6<br>6_BOVIN | rEPV<br>EQT<br>GDD<br>ER | 89% | 39.8 | 50.6592  | Ref | 0.14  | 0.41  | Value<br>Missi<br>ng (-<br>1.425<br>7195) | -0.94 | -0.95 | -0.83 | -0.3  | 709   | 680  | 888   | Value<br>Missing<br>(-<br>1.4257<br>195) | 430   | 373   | 424   | 606   | 867.9 | 1733.8 | 2 | 0.0135 | 7.794 |
| Uncharacterized<br>protein OS=Bos<br>taurus GN=Bt.64790<br>PE=3 SV=1 | tr F1N4M<br>7 F1N4M<br>7_BOVIN,<br>tr Q32P14<br> Q32P14_<br>BOVIN                                                                   | gFQL<br>GAL<br>DTH<br>R  | 95% | 51.8 | 52.11353 | Ref | 0.43  | 0.27  | -0.09                                     | 0.1   | -0.08 | 0.31  | 0.22  | 5830  | 7470 | 7220  | 6330                                     | 7960  | 6150  | 8400  | 7810  | 506.9 | 1517.8 | 3 | 0.0103 | 6.785 |
| Uncharacterized<br>protein OS=Bos<br>taurus GN=Bt.64790<br>PE=3 SV=1 | tr F1N4M<br>7 F1N4M<br>7_BOVIN,<br>tr Q32P14<br> Q32P14_<br>BOVIN                                                                   | gFQL<br>GAL<br>DTH<br>R  | 79% | 37.9 | 52.07209 | Ref | 0.15  | -0.12 | 0.2                                       | 0.18  | -0.05 | 0.2   | 0.48  | 3670  | 3460 | 3120  | 4360                                     | 4730  | 3530  | 4380  | 5290  | 506.9 | 1517.8 | 3 | 0.0134 | 8.839 |

|                                                                    |                                                |                                    |     |      |          |     |       |       |       |       |       |       |       |       |       |       |       |       |       |       |       |       |        |   |        |       |
|--------------------------------------------------------------------|------------------------------------------------|------------------------------------|-----|------|----------|-----|-------|-------|-------|-------|-------|-------|-------|-------|-------|-------|-------|-------|-------|-------|-------|-------|--------|---|--------|-------|
| Uncharacterized protein OS=Bos taurus GN=Bt.64790 PE=3 SV=1        | tr F1N4M7 F1N4M7_BOVIN, tr Q32P14 Q32P14_BOVIN | rDPD<br>PNS<br>AEcL<br>HVR         | 95% | 54.1 | 51.01383 | Ref | 0.083 | 0.47  | 0.021 | 0.11  | -0.03 | 0.39  | 0.029 | 10100 | 9320  | 13200 | 10900 | 12700 | 10100 | 14100 | 10900 | 490.5 | 1957.9 | 4 | 0.0132 | 6.722 |
| Putative uncharacterized protein OS=Mus musculus GN=Actb PE=2 SV=1 | tr Q3U804 Q3U804_MOUSE, tr Q3U939 Q3U939_MOUSE | vAPE<br>EHP<br>VLLT<br>EAPL<br>NPK | 72% | 36.4 | 52.74303 | Ref | -0.18 | -0.26 | -0.27 | -0.25 | -0.3  | 0.009 | -0.63 | 29200 | 20300 | 20800 | 23200 | 25900 | 21900 | 28300 | 18000 | 854.8 | 2561.5 | 3 | 0.005  | 1.946 |
| Putative uncharacterized protein OS=Mus musculus GN=Actb PE=2 SV=1 | tr Q3U804 Q3U804_MOUSE, tr Q3U939 Q3U939_MOUSE | vAPE<br>EHP<br>VLLT<br>EAPL<br>NPK | 95% | 70.1 | 53.32305 | Ref | -0.22 | -0.17 | -0.22 | -0.16 | -0.26 | 0.012 | -0.49 | 2420  | 2020  | 2260  | 2450  | 2830  | 2310  | 2900  | 2030  | 1282  | 2561.4 | 2 | 0.0197 | 7.704 |
| Uncharacterized protein OS=Bos taurus GN=Bt.43863 PE=4 SV=1        | tr E1BME9 E1BME9_BOVIN                         | gGSP<br>VAE<br>ASR                 | 81% | 36.1 | 50.27158 | Ref | -0.33 | -0.11 | -0.1  | -0.38 | 0.075 | -0.62 | -0.16 | 16000 | 11100 | 14100 | 15900 | 14500 | 17300 | 11100 | 15200 | 617.8 | 1233.7 | 2 | 0.0085 | 6.894 |
| Uncharacterized protein OS=Bos taurus GN=Bt.43863 PE=4 SV=1        | tr E1BME9 E1BME9_BOVIN                         | gQQ<br>LAPP<br>TAD<br>AVSk         | 71% | 36.5 | 53.56749 | Ref | -0.43 | -0.21 | -0.05 | -0.55 | 0.31  | -0.78 | -0.11 | 5500  | 3550  | 4500  | 5630  | 4400  | 6950  | 3410  | 5390  | 996.1 | 1990.1 | 2 | 0.0197 | 9.917 |
| Uncharacterized protein OS=Bos taurus GN=Bt.43863 PE=4 SV=1        | tr E1BME9 E1BME9_BOVIN                         | qGS<br>DSEA<br>AQW<br>GR           | 95% | 56.3 | 49.32514 | Ref | -0.42 | -0.27 | -0.07 | -0.3  | 0.06  | -1    | 0.12  | 13200 | 8230  | 9920  | 12900 | 12000 | 13500 | 6730  | 14600 | 798.4 | 1594.8 | 2 | 0.0114 | 7.173 |

|                                                                                |                                |                                          |     |      |          |     |       |       |       |       |       |       |       |       |       |       |       |       |       |       |       |       |        |   |        |       |
|--------------------------------------------------------------------------------|--------------------------------|------------------------------------------|-----|------|----------|-----|-------|-------|-------|-------|-------|-------|-------|-------|-------|-------|-------|-------|-------|-------|-------|-------|--------|---|--------|-------|
| Uncharacterized protein (Fragment)<br>OS=Bos taurus<br>GN=Bt.6409 PE=4<br>SV=1 | tr F1MM<br>F4 F1MM<br>F4_BOVIN | rPED<br>ESPP<br>AAA<br>ATS<br>GAA<br>PAR | 69% | 36.7 | 53.75507 | Ref | -0.17 | -0.4  | -0.27 | -0.13 | -0.1  | -0.36 | -0.16 | 10700 | 8240  | 7620  | 9400  | 11400 | 10200 | 8820  | 10100 | 742.7 | 2225.1 | 3 | 0.0129 | 5.803 |
| Uncharacterized protein (Fragment)<br>OS=Bos taurus<br>GN=Bt.6409 PE=4<br>SV=1 | tr F1MM<br>F4 F1MM<br>F4_BOVIN | rPED<br>ESPP<br>AAA<br>ATS<br>GAA<br>PAR | 94% | 51.8 | 53.66236 | Ref | 0.048 | 0.043 | -0.58 | -0.21 | -0.24 | -0.35 | -0.34 | 2330  | 2150  | 2320  | 1690  | 2410  | 2060  | 1990  | 1990  | 742.7 | 2225.1 | 3 | 0.0171 | 7.703 |
| Uncharacterized protein (Fragment)<br>OS=Bos taurus<br>GN=Bt.6409 PE=4<br>SV=1 | tr F1MM<br>F4 F1MM<br>F4_BOVIN | sTTT<br>ASEE<br>DVSS<br>R                | 95% | 54.4 | 50.05086 | Ref | -0.36 | -0.4  | -0.24 | -0.22 | 0.21  | -1    | 0.052 | 11200 | 7020  | 7430  | 9290  | 10400 | 12200 | 5370  | 11400 | 837.4 | 1672.8 | 2 | 0.0115 | 6.841 |
| Uncharacterized protein OS=Bos taurus<br>GN=ATXN2L<br>PE=4 SV=1                | tr E1BJ59<br> E1BJ59_<br>BOVIN | aDGL<br>QVG<br>QDA<br>R                  | 85% | 38.4 | 51.10499 | Ref | -0.34 | -0.02 | -0.21 | -0.15 | 0.33  | -0.46 | 0.084 | 17000 | 11700 | 15800 | 15500 | 17900 | 21800 | 13200 | 19000 | 717.4 | 1432.7 | 2 | 0.0133 | 9.26  |
| Uncharacterized protein OS=Bos taurus<br>GN=ATXN2L<br>PE=4 SV=1                | tr E1BJ59<br> E1BJ59_<br>BOVIN | eFNP<br>TkPL<br>LSVN<br>k                | 61% | 29.9 | 50.5942  | Ref | -0.18 | -0.18 | -0.08 | -0.16 | 0.2   | -0.38 | 0.06  | 9060  | 6860  | 7460  | 8980  | 9340  | 10500 | 7310  | 9850  | 600.6 | 2398.4 | 4 | 0.0192 | 7.985 |
| Uncharacterized protein OS=Bos taurus<br>GN=ATXN2L<br>PE=4 SV=1                | tr E1BJ59<br> E1BJ59_<br>BOVIN | fELA<br>VDA<br>VHR                       | 95% | 67.3 | 52.09633 | Ref | 0.039 | 0.19  | 0.046 | -0.23 | -0.15 | -0.4  | -0.12 | 3050  | 2860  | 3440  | 3500  | 3190  | 2940  | 2580  | 3120  | 487.6 | 1459.8 | 3 | 0.0098 | 6.688 |

|                                                                                 |                                                                                                                                                                                                                               |              |     |      |          |     |        |       |       |       |       |       |       |       |      |      |       |       |       |      |       |       |        |   |        |       |
|---------------------------------------------------------------------------------|-------------------------------------------------------------------------------------------------------------------------------------------------------------------------------------------------------------------------------|--------------|-----|------|----------|-----|--------|-------|-------|-------|-------|-------|-------|-------|------|------|-------|-------|-------|------|-------|-------|--------|---|--------|-------|
| Zinc finger CCCH domain-containing protein 15 OS=Bos taurus GN=ZC3H15 PE=2 SV=1 | M1 ZC3HF_BOVIN, sp Q3TIV5 ZC3HF_MOUSE, sp Q6U6G5 ZC3HF_RAT, sp Q8WU90 ZC3HF_HUMAN, tr B1B079 B1B079_MOUSE, tr B7Z592 B7Z592_HUMAN, tr D211X0 D211X0_AILME, tr F1PEL5 F1PEL5_CANFA, tr F1RYJ5 F1RYJ5_PI, tr F5H0F5 F5H0F5_HUMA | aVTH QVk     | 52% | 28.4 | 48.85587 | Ref | -0.27  | -0.36 | -0.16 | -0.27 | 0.21  | -0.89 | -0.06 | 12600 | 9410 | 9580 | 12400 | 12600 | 15400 | 7480 | 13200 | 695.9 | 1389.9 | 2 | 0.0044 | 3.142 |
| Zinc finger CCCH domain-containing protein 15 OS=Bos taurus GN=ZC3H15 PE=2 SV=1 | M1 ZC3HF_BOVIN, sp Q3TIV5 ZC3HF_MOUSE, sp Q6U6G5 ZC3HF_RAT, sp Q8WU90 ZC3HF_HUMAN, tr B1B079 B1B079_MOUSE, tr B7Z592 B7Z592_HUMAN, tr D211X0 D211X0_AILME, tr F1PEL5 F1PEL5_CANFA, tr F1RYJ5 F1RYJ5_PI, tr F5H0F5 F5H0F5_HUMA | ITLES FLA WK | 87% | 41.4 | 51.62499 | Ref | -0.086 | -0.45 | -0.35 | -0.34 | -0.27 | -0.29 | -0.17 | 793   | 560  | 474  | 568   | 630   | 577   | 595  | 642   | 606   | 1815.1 | 3 | 0.0092 | 5.067 |

|                                                                                 |                                                                                                                                                                                                                                                  |                      |     |      |          |     |        |       |       |        |       |       |       |      |      |      |      |      |      |      |      |       |        |   |        |       |
|---------------------------------------------------------------------------------|--------------------------------------------------------------------------------------------------------------------------------------------------------------------------------------------------------------------------------------------------|----------------------|-----|------|----------|-----|--------|-------|-------|--------|-------|-------|-------|------|------|------|------|------|------|------|------|-------|--------|---|--------|-------|
| Zinc finger CCCH domain-containing protein 15 OS=Bos taurus GN=ZC3H15 PE=2 SV=1 | M1 ZC3HF_BOVIN, sp Q3TIV5 ZC3HF_MOUSE, sp Q6U6G5 ZC3HF_RAT, sp Q8WU90 ZC3HF_HUMAN, tr B1B079 B1B079_MOUSE, tr B7Z592 B7Z592_HUMAN, tr D211X0 D211X0_AILME, tr F1PEL5 F1PEL5_CANFA, tr F1RYJ5 F1RYJ5_PI1R1YJ5 F1RYJ5 F5H0G, tr F5H0F5 F5H0F5_HUMA | qVAQSEAEk            | 95% | 51.7 | 52.99425 | Ref | -0.19  | -0.37 | -0.03 | -0.16  | -0    | -0.9  | -0.19 | 5260 | 4000 | 3840 | 5470 | 5490 | 5350 | 3010 | 4870 | 799.4 | 1596.9 | 2 | 0.0121 | 7.543 |
| Elongation factor 2 OS=Bos taurus GN=EEF2 PE=2 SV=3                             | sp Q3SYU2 EF2_BOVIN                                                                                                                                                                                                                              | eTVSEESNVLcLSk       | 95% | 70.6 | 53.9423  | Ref | 0.0085 | -0.03 | 0.003 | 0.046  | -0    | -0.11 | 0.02  | 2810 | 2080 | 2190 | 2520 | 2860 | 2410 | 2340 | 2540 | 731.4 | 2191.1 | 3 | 0.0194 | 8.845 |
| Elongation factor 2 OS=Bos taurus GN=EEF2 PE=2 SV=3                             | sp Q3SYU2 EF2_BOVIN                                                                                                                                                                                                                              | eTVSEESNVLcLSk       | 95% | 62.5 | 54.0815  | Ref | 0.034  | -0.18 | 0.19  | -0.016 | -0.18 | 0.23  | 0.061 | 2930 | 2610 | 2440 | 3550 | 3380 | 2630 | 3650 | 3230 | 731.4 | 2191.1 | 3 | 0.0121 | 5.505 |
| Elongation factor 2 OS=Bos taurus GN=EEF2 PE=2 SV=3                             | sp Q3SYU2 EF2_BOVIN                                                                                                                                                                                                                              | gHVF EETQVAGTPM FVVK | 94% | 51.6 | 55.02846 | Ref | 0.21   | 0.041 | 0.2   | -0.067 | -0.17 | 0.11  | -0.13 | 577  | 605  | 582  | 732  | 668  | 543  | 689  | 578  | 862.1 | 2583.4 | 3 | 0.0174 | 6.746 |

|                                                                             |                      |            |     |      |          |     |      |       |       |        |       |       |       |       |       |       |       |       |       |       |       |       |        |   |        |       |
|-----------------------------------------------------------------------------|----------------------|------------|-----|------|----------|-----|------|-------|-------|--------|-------|-------|-------|-------|-------|-------|-------|-------|-------|-------|-------|-------|--------|---|--------|-------|
| Peptidyl-prolyl cis-trans isomerase D<br>OS=Bos taurus<br>GN=PPID PE=1 SV=6 | sp P26882 PPID_BOVIN | aAAEDADGAK | 95% | 66.3 | 52.66352 | Ref | 0.58 | -0.47 | -0.09 | 0.25   | 0.28  | -0.54 | -0.36 | 8450  | 8830  | 4620  | 6740  | 9420  | 8390  | 4980  | 5570  | 763.9 | 1525.8 | 2 | 0.0072 | 4.695 |
| Peptidyl-prolyl cis-trans isomerase D<br>OS=Bos taurus<br>GN=PPID PE=1 SV=6 | sp P26882 PPID_BOVIN | hVVF GQVIk | 93% | 44.3 | 48.80156 | Ref | 0.34 | -0.02 | 0.1   | -0.07  | -0.02 | 0.12  | 0.044 | 21100 | 26200 | 22100 | 27100 | 26400 | 24000 | 27600 | 25900 | 545.7 | 1634   | 3 | 0.0073 | 4.477 |
| Peptidyl-prolyl cis-trans isomerase D<br>OS=Bos taurus<br>GN=PPID PE=1 SV=6 | sp P26882 PPID_BOVIN | hVVF GQVIk | 91% | 41.2 | 48.11233 | Ref | 0.26 | -0.04 | 0.052 | -0.055 | -0    | 0.01  | 0.14  | 5840  | 6080  | 5350  | 6400  | 6560  | 5930  | 6250  | 6810  | 545.7 | 1634   | 3 | #####  | ##### |



|                                                                      |                                                                                                                                                                                                                                                                                                                                |                  |     |      |          |     |       |      |       |       |      |       |      |       |       |       |       |       |       |       |       |       |        |   |        |       |
|----------------------------------------------------------------------|--------------------------------------------------------------------------------------------------------------------------------------------------------------------------------------------------------------------------------------------------------------------------------------------------------------------------------|------------------|-----|------|----------|-----|-------|------|-------|-------|------|-------|------|-------|-------|-------|-------|-------|-------|-------|-------|-------|--------|---|--------|-------|
| THO complex<br>subunit 4 OS=Mus<br>musculus<br>GN=Thoc4 PE=1<br>SV=3 | 3 THOC4<br>_MOUSE,<br>sp Q3T0I<br>4 THOC4<br>_BOVIN,s<br>p Q86V81<br> THOC4_<br>HUMAN,t<br>r D2GVF2<br> D2GVF2<br>_AILME,tr<br> D3ZXH5 <br>D3ZXH5_<br>RAT,tr D3<br>ZXH7 D3Z<br>XH7_RAT,<br>tr E9PB61<br> E9PB61_<br>HUMAN,t<br>r F1PL92 <br>F1PL92_C<br>ANFA,tr F<br>6Q1W2 F<br>6Q1W2_<br>MONDO,t<br>r F6S9B3<br> F6S9B3_<br>R | aAV<br>HYD       | 90% | 42.5 | 50.37725 | Ref | -0.35 | 0.34 | -0.05 | -0.14 | 0.35 | -0.24 | 0.51 | 63100 | 41400 | 72500 | 62000 | 64200 | 78600 | 54500 | 91300 | 379.2 | 1134.6 | 3 | 0.01   | 8.827 |
| THO complex<br>subunit 4 OS=Mus<br>musculus<br>GN=Thoc4 PE=1<br>SV=3 | 3 THOC4<br>_MOUSE,<br>sp Q3T0I<br>4 THOC4<br>_BOVIN,s<br>p Q86V81<br> THOC4_<br>HUMAN,t<br>r D2GVF2<br> D2GVF2<br>_AILME,tr<br> D3ZXH5 <br>D3ZXH5_<br>RAT,tr D3<br>ZXH7 D3Z<br>XH7_RAT,<br>tr E9PB61<br> E9PB61_<br>HUMAN,t<br>r F1PL92 <br>F1PL92_C<br>ANFA,tr F<br>6Q1W2 F<br>6Q1W2_<br>MONDO,t<br>r F6S9B3<br> F6S9B3_<br>R | kAA<br>VHY<br>DR | 78% | 35.8 | 52.21414 | Ref | -0.17 | 0.23 | 0.029 | 0.002 | 0.34 | -0.13 | 0.38 | 45900 | 38000 | 54500 | 53100 | 57400 | 63400 | 47900 | 67300 | 392.7 | 1566.9 | 4 | 0.0242 | 15.41 |

|                                                                               |                                                                                                                                                                                                                              |              |     |      |          |     |       |      |       |        |      |       |       |       |       |       |       |       |       |       |       |       |        |   |        |       |
|-------------------------------------------------------------------------------|------------------------------------------------------------------------------------------------------------------------------------------------------------------------------------------------------------------------------|--------------|-----|------|----------|-----|-------|------|-------|--------|------|-------|-------|-------|-------|-------|-------|-------|-------|-------|-------|-------|--------|---|--------|-------|
| THO complex subunit 4 OS=Mus musculus GN=Thoc4 PE=1 SV=3                      | 3 THOC4_MOUSE,sp Q3T014 THOC4_BOVIN,sp Q86V81 THOC4_HUMAN, tr D2GVF2 D2GVF2_AILME, tr D3ZXH5 D3ZXH5_RAT, tr D3ZXH7 D3ZXH7_RAT, tr E9PB61 E9PB61_HUMAN, tr F1PL92 F1PL92_CANFA, tr F6Q1W2 F6Q1W2_MONDO, tr F6S9B3 F6S9B3_HFER | SLGT ADV     | 83% | 39.5 | 51.87309 | Ref | 0.096 | 0.3  | -0.16 | -0.016 | 0.35 | -0.28 | 0.29  | 3380  | 3140  | 3930  | 3200  | 3900  | 4380  | 2950  | 4340  | 512.6 | 1534.8 | 3 | 0.012  | 7.818 |
| Heterogeneous nuclear ribonucleoprotein H OS=Mus musculus GN=Hnrnp1 PE=1 SV=3 | 7 HNRH1_MOUSE,sp P31943 HNRH1_HUMAN, tr B4DP51 B4DP51_HUMAN, tr D2HGC3 D2HGC3_AILME, tr D3ZSG5 D3ZSG5_RAT, tr D3ZYW2 D3ZYW2_RAT, tr E1BF20 E1BF20_BOVIN, tr E2R8D4 E2R8D4_CANFA, tr E2R8D6 E2R8D6_CANFA, tr E2R8G1 E2R8G1_CA | VHIEI GPD GR | 92% | 46.7 | 51.97382 | Ref | 0.26  | 0.22 | 0.081 | -0.16  | -0.2 | -0.04 | -0.31 | 21000 | 21900 | 23100 | 23500 | 21900 | 18700 | 21800 | 17900 | 466.3 | 1395.8 | 3 | 0.0115 | 8.199 |

|                                                                               |                                                                                                                                                                                                                                |                             |     |      |          |     |      |       |       |        |       |       |       |       |       |      |       |       |       |       |       |       |        |   |        |       |
|-------------------------------------------------------------------------------|--------------------------------------------------------------------------------------------------------------------------------------------------------------------------------------------------------------------------------|-----------------------------|-----|------|----------|-----|------|-------|-------|--------|-------|-------|-------|-------|-------|------|-------|-------|-------|-------|-------|-------|--------|---|--------|-------|
| Heterogeneous nuclear ribonucleoprotein H OS=Mus musculus GN=Hnrnp1 PE=1 SV=3 | 7 HNRH1_MOUSE,sp P31943 HNRH1_HUMAN, tr B4DP51 B4DP51_HUMAN, tr D2HGC3 D2HGC3_AILME, tr D3ZSG5 D3ZSG5_RAT, tr D3ZYW2 D3ZYW2_RA T, tr E1BF20 E1BF20_BOVIN, tr E2R8D4 E2R8D4_CANFA, tr E2R8D6 E2R8D6_C ANFA, tr E2R8G1 E2R8G1_CA | VHIEI GPD                   | 76% | 36.8 | 51.97413 | Ref | 0.24 | 0.083 | 0.018 | -0.077 | 0.055 | -0.24 | -0.14 | 9460  | 9850  | 9610 | 10300 | 10600 | 10200 | 8650  | 9210  | 466.3 | 1395.8 | 3 | 0.0118 | 8.414 |
|                                                                               | 7 HNRH1_MOUSE,sp P31943 HNRH1_HUMAN, tr B4DP51 B4DP51_HUMAN, tr D2HGC3 D2HGC3_AILME, tr D3ZSG5 D3ZSG5_RAT, tr D3ZYW2 D3ZYW2_RA T, tr E1BF20 E1BF20_BOVIN, tr E2R8D4 E2R8D4_CANFA, tr E2R8D6 E2R8D6_C ANFA, tr E2R8G1 E2R8G1_CA | VTGE ADV EFAT HED AVA AMS k | 95% | 53   | 54.91559 | Ref | 0.21 | -0.08 | -0.52 | -0.083 | 0.069 | -0.02 | 0.073 | 11900 | 10500 | 9330 | 7710  | 11500 | 11100 | 11000 | 11600 | 697.4 | 2785.4 | 4 | 0.0123 | 4.426 |

|                                                                            |                                                                                        |                     |     |      |          |     |       |       |       |       |       |       |       |       |       |       |       |       |       |       |       |       |        |   |        |       |
|----------------------------------------------------------------------------|----------------------------------------------------------------------------------------|---------------------|-----|------|----------|-----|-------|-------|-------|-------|-------|-------|-------|-------|-------|-------|-------|-------|-------|-------|-------|-------|--------|---|--------|-------|
| SAP domain-containing ribonucleoprotein OS=Homo sapiens GN=SARNP PE=1 SV=3 | sp P82979 SARNP_HUMAN,sp Q498U4 SARNP_RAT,sp Q5R4V4 SARNP_PONAB,tr Q2TBX1 Q2TBX1_BOVIN | aTETVELHk           | 84% | 38.1 | 51.4288  | Ref | -0.27 | -0.22 | -0.58 | -0.54 | -0.25 | -0.12 | -0.29 | 42400 | 22600 | 25300 | 22200 | 25200 | 26800 | 30600 | 27000 | 687.4 | 1372.7 | 2 | 0.0108 | 7.885 |
| SAP domain-containing ribonucleoprotein OS=Homo sapiens GN=SARNP PE=1 SV=3 | sp P82979 SARNP_HUMAN,sp Q498U4 SARNP_RAT,sp Q5R4V4 SARNP_PONAB,tr Q2TBX1 Q2TBX1_BOVIN | fGIVTSSAGTGTTEDTEAK | 95% | 67.2 | 54.92599 | Ref | -0.25 | -0.35 | -0.56 | -0.15 | 0.009 | -0.5  | 0.084 | 9030  | 6590  | 6710  | 6490  | 9480  | 9260  | 6810  | 10100 | 827.4 | 2479.3 | 3 | 0.0195 | 7.869 |
| SAP domain-containing ribonucleoprotein OS=Homo sapiens GN=SARNP PE=1 SV=3 | sp P82979 SARNP_HUMAN,sp Q498U4 SARNP_RAT,sp Q5R4V4 SARNP_PONAB,tr Q2TBX1 Q2TBX1_BOVIN | fGLNVSSISR          | 51% | 31.1 | 51.73586 | Ref | -0.43 | -0.05 | -0.46 | -0.23 | -0.08 | -0.29 | 0.16  | 13800 | 11000 | 15500 | 13200 | 16900 | 16500 | 14800 | 20100 | 692.4 | 1382.8 | 2 | 0.0115 | 8.276 |
| Uncharacterized protein OS=Bos taurus GN=VTN PE=2 SV=1                     | tr Q3ZBS7 Q3ZBS7_BOVIN                                                                 | fQDGVLEPDFP         | 83% | 38.8 | 52.38894 | Ref | -0.09 | 0.72  | -0.04 | 0.19  | -0.08 | 0.72  | 0.14  | 9440  | 7710  | 14700 | 9730  | 12600 | 9110  | 16600 | 11000 | 862.4 | 1722.9 | 2 | 0.0146 | 8.489 |
| Uncharacterized protein OS=Bos taurus GN=VTN PE=2 SV=1                     | tr Q3ZBS7 Q3ZBS7_BOVIN                                                                 | gLYcYELDEk          | 89% | 42.8 | 51.86009 | Ref | 0.14  | 0.51  | -0.01 | 0.097 | -0.07 | 0.91  | 0.077 | 3260  | 3370  | 4720  | 3710  | 4400  | 3410  | 7060  | 3930  | 629.6 | 1885.9 | 3 | 0.0195 | 10.35 |

|                                                                                                 |                        |                                                |     |      |          |     |       |      |       |        |       |      |       |       |       |       |       |       |       |       |       |       |        |   |        |       |
|-------------------------------------------------------------------------------------------------|------------------------|------------------------------------------------|-----|------|----------|-----|-------|------|-------|--------|-------|------|-------|-------|-------|-------|-------|-------|-------|-------|-------|-------|--------|---|--------|-------|
| Uncharacterized protein OS=Bos taurus GN=VTN PE=2 SV=1                                          | tr Q3ZBS7 Q3ZBS7_BOVIN | rVDA<br>VIPP<br>YPR                            | 73% | 35.9 | 51.87794 | Ref | 0.48  | 0.41 | 0.16  | 0.074  | 0.071 | 0.45 | 0.075 | 8770  | 10300 | 10700 | 10100 | 10500 | 9110  | 12400 | 9460  | 529.6 | 1585.9 | 3 | 0.014  | 8.831 |
| Putative uncharacterized protein (Fragment) OS=Ailuropoda melanoleuca GN=PANDA_007210 PE=4 SV=1 | tr D2HA11 D2HA11_AILME | gGA<br>GPP<br>GPE<br>GGk                       | 95% | 47.9 | 52.53163 | Ref | -1.7  | 1.5  | -2.2  | 0.046  | -1.5  | 1.3  | -2.5  | 4030  | 1060  | 10400 | 946   | 4850  | 1430  | 10400 | 776   | 794.9 | 1587.9 | 2 | 0.0244 | 15.35 |
| Putative uncharacterized protein (Fragment) OS=Ailuropoda melanoleuca GN=PANDA_007210 PE=4 SV=1 | tr D2HA11 D2HA11_AILME | gGA<br>GPP<br>GPE<br>GGk                       | 77% | 37.5 | 52.45291 | Ref | -0.36 | 0.67 | -0.67 | -0.045 | -0.38 | 0.72 | -0.26 | 16900 | 10900 | 24200 | 10800 | 18200 | 12600 | 28300 | 14200 | 530.3 | 1587.9 | 3 | 0.0219 | 13.79 |
| Putative uncharacterized protein (Fragment) OS=Ailuropoda melanoleuca GN=PANDA_007210 PE=4 SV=1 | tr D2HA11 D2HA11_AILME | nGD<br>RGET<br>GPA<br>GPS<br>GAP<br>GPA<br>GSR | 90% | 44.3 | 52.40032 | Ref | -0.88 | 1.1  | -0.76 | -0.017 | -0.54 | 0.87 | -0.67 | 9000  | 4660  | 19300 | 6160  | 11400 | 6910  | 19200 | 6550  | 757.4 | 2269.1 | 3 | 0.0192 | 8.438 |

|                                                                |                                                                                                                                                                                                                                  |           |     |      |          |     |       |       |       |       |       |       |       |       |       |       |       |       |       |       |       |        |        |        |        |       |
|----------------------------------------------------------------|----------------------------------------------------------------------------------------------------------------------------------------------------------------------------------------------------------------------------------|-----------|-----|------|----------|-----|-------|-------|-------|-------|-------|-------|-------|-------|-------|-------|-------|-------|-------|-------|-------|--------|--------|--------|--------|-------|
| Phosphoglycerate kinase 1 OS=Pan troglodytes GN=PGK1 PE=2 SV=1 | 4 PGK1_P ANTR,sp P00558 PGK1_HUMAN,sp P00559 PGK1_HORSE,sp Q3T0P6 PGK1_BOVIN,sp Q5NVB5 PGK1_PONAB,sp Q60HD8 PGK1_MAFCA,sp Q7SIB7 PGK1_PIG,trans A8K4W6 A8K4W6_HUMAN,trans B7TJ13 B7TJ13_SHEEP,trans B7Z7A9 B7Z7A9_HUMAN,trans VK | aLM DEV   | 94% | 45.2 | 51.68831 | Ref | -0.16 | -0.14 | -0.1  | -0.24 | -0.12 | -0.36 | 23500 | 18300 | 20100 | 23200 | 23100 | 20200 | 23000 | 19300 | 756.9 | 1511.9 | 2      | 0.0068 | 4.509  |       |
| Phosphoglycerate kinase 1 OS=Pan troglodytes GN=PGK1 PE=2 SV=1 | 4 PGK1_P ANTR,sp P00558 PGK1_HUMAN,sp P00559 PGK1_HORSE,sp Q3T0P6 PGK1_BOVIN,sp Q5NVB5 PGK1_PONAB,sp Q60HD8 PGK1_MAFCA,sp Q7SIB7 PGK1_PIG,trans A8K4W6 A8K4W6_HUMAN,trans B7TJ13 B7TJ13_SHEEP,trans B7Z7A9 B7Z7A9_HUMAN,trans k  | dcVG PEVE | 53% | 32.6 | 52.68353 | Ref | -0.19 | -0.24 | -0.08 | -0.26 | -0.25 | 0.042 | -0.44 | 21000 | 15700 | 16500 | 20600 | 20100 | 17600 | 22500 | 16000 | 544    | 1628.8 | 3      | 0.0079 | 4.869 |

|                                                                             |                                                                                                                                                                                                                      |                      |     |      |          |     |       |       |      |       |       |       |       |       |       |       |       |       |       |       |       |     |        |   |        |       |
|-----------------------------------------------------------------------------|----------------------------------------------------------------------------------------------------------------------------------------------------------------------------------------------------------------------|----------------------|-----|------|----------|-----|-------|-------|------|-------|-------|-------|-------|-------|-------|-------|-------|-------|-------|-------|-------|-----|--------|---|--------|-------|
| Phosphoglycerate kinase 1 OS=Pan troglodytes GN=PGK1 PE=2 SV=1              | 4 PGK1_P ANTR,sp P00558 PGK1_HUMAN,sp P00559 PGK1_HORSE,sp Q3T0P6 PGK1_BOVIN,sp Q5NVB5 PGK1_PONAB,sp Q60HD8 PGK1_MA CFA,sp Q7SIB7 PGK1_PIG,tra8K4W6 A8K4W6_HUMAN,traB7TJ13 B7TJ13_SHEEP,traB7Z7A9 B7Z7A9_HUMAN,traHR | IGDV YVN DAF GTA     | 77% | 38.3 | 52.96281 | Ref | -0.24 | -0.43 | -0.1 | -0.31 | -0.13 | -0.08 | 0.24  | 22300 | 21600 | 20500 | 29100 | 27600 | 27400 | 29700 | 36700 | 647 | 1938   | 3 | 0.0134 | 6.923 |
| Chloride intracellular channel protein 4 OS=Mus musculus GN=Clic4 PE=1 SV=3 | B1 CLIC4_MOUSE,sp Q9XSA7 CLIC4_BOVIN,sp Q9Y696 CLIC4_HUMAN,sp Q9Z0W7 CLIC4_RAT,traB4DWC4 B4DWC4_HUMAN,traE2RGI4 E2RGI4_CANFA,traF5H1F8 F5H1F8_HUMAN,traF6PP70 F6PP70_MACM U,traF7EXF2 F7EXF2_CALJA,traF7H766 F7H766  | aGS DGE SIGN cPFS QR | 86% | 37.2 | 47.89687 | Ref | 0.4   | 0.008 | -0   | -0.2  | -0.28 | -0.12 | -0.16 | 5350  | 6130  | 5080  | 5670  | 5430  | 4510  | 5250  | 5070  | 659 | 1973.9 | 3 | 0.0111 | 5.645 |

|                                                                             |                                                                                                                                                                                                                  |                |     |      |          |     |     |       |       |        |       |       |       |      |      |      |      |      |      |      |      |     |        |   |        |       |
|-----------------------------------------------------------------------------|------------------------------------------------------------------------------------------------------------------------------------------------------------------------------------------------------------------|----------------|-----|------|----------|-----|-----|-------|-------|--------|-------|-------|-------|------|------|------|------|------|------|------|------|-----|--------|---|--------|-------|
| Chloride intracellular channel protein 4 OS=Mus musculus GN=Clic4 PE=1 SV=3 | B1 CLIC4_MOUSE,sp Q9XSA7 CLIC4_BOVIN,sp Q9Y696 CLIC4_HUMAN,sp Q9Z0W7 CLIC4_RAT,tr B4DWC4 B4DWC4_HUMAN,tr E2RGI4 E2RGI4_CANFA,tr F5H1F8 F5H1F8_HUMAN,tr F6PP70 F6PP70_MACMU,tr F7EXF2 F7EXF2_CALJAr F7H766 F7H766 | gVVF SVTT VDLK | 92% | 46.5 | 51.5982  | Ref | 0.2 | -0.03 | 0.037 | -0.076 | -0.2  | 0.081 | -0.15 | 1690 | 1870 | 1730 | 2030 | 2070 | 1660 | 2110 | 1790 | 625 | 1872.1 | 3 | 0.011  | 5.859 |
| Chloride intracellular channel protein 4 OS=Mus musculus GN=Clic4 PE=1 SV=3 | B1 CLIC4_MOUSE,sp Q9XSA7 CLIC4_BOVIN,sp Q9Y696 CLIC4_HUMAN,sp Q9Z0W7 CLIC4_RAT,tr B4DWC4 B4DWC4_HUMAN,tr E2RGI4 E2RGI4_CANFA,tr F5H1F8 F5H1F8_HUMAN,tr F6PP70 F6PP70_MACMU,tr F7EXF2 F7EXF2_CALJAr F7H766 F7H766 | gVVF SVTT VDLK | 95% | 51.5 | 51.56467 | Ref | 0.3 | -0.1  | 0.11  | -0.22  | -0.08 | -0.11 | -0.26 | 709  | 736  | 606  | 786  | 692  | 666  | 680  | 609  | 625 | 1872.1 | 3 | 0.0086 | 4.593 |



|                                                             |                        |                                                 |     |      |          |     |       |       |       |       |       |       |      |       |       |       |       |       |       |       |       |       |        |   |        |       |
|-------------------------------------------------------------|------------------------|-------------------------------------------------|-----|------|----------|-----|-------|-------|-------|-------|-------|-------|------|-------|-------|-------|-------|-------|-------|-------|-------|-------|--------|---|--------|-------|
| Uncharacterized protein OS=Bos taurus GN=Bt.56566 PE=4 SV=1 | tr E1BEM3 E1BEM3_BOVIN | eDPS<br>DNW<br>EEG<br>GGG<br>GGG<br>VEK         | 95% | 55.8 | 51.33091 | Ref | -0.15 | 0.52  | 0.35  | 0.59  | 0.71  | 0.41  | 0.7  | 10700 | 5330  | 9170  | 9160  | 12000 | 11300 | 9620  | 11700 | 828.7 | 2483.1 | 3 | 0.0202 | 8.149 |
| Uncharacterized protein OS=Bos taurus GN=Bt.56566 PE=4 SV=1 | tr E1BEM3 E1BEM3_BOVIN | eVD<br>YSGL<br>R                                | 60% | 31.4 | 50.58339 | Ref | -0.65 | 0.25  | 0.62  | 0.57  | 1     | 0.09  | 1.2  | 39400 | 21800 | 44100 | 64100 | 68100 | 81100 | 44600 | 98100 | 621.8 | 1241.6 | 2 | 0.0101 | 8.134 |
| Uncharacterized protein OS=Bos taurus GN=Bt.56566 PE=4 SV=1 | tr E1BEM3 E1BEM3_BOVIN | kAP<br>QGP<br>PEIY<br>SDT<br>QFPS<br>LQST<br>AK | 63% | 35.1 | 55.3016  | Ref | -0.3  | 0.28  | 0.54  | 0.6   | 0.98  | 0.34  | 1.2  | 1320  | 1150  | 1860  | 2500  | 2870  | 3280  | 2190  | 3870  | 851.5 | 3401.8 | 4 | 0.0348 | 10.23 |
| Uncharacterized protein OS=Bos taurus GN=UBAP2 PE=4 SV=1    | tr E1BA82 E1BA82_BOVIN | aAPL<br>MTS<br>Gk                               | 52% | 32   | 52.39047 | Ref | 0.17  | 0.043 | 0.038 | -0.13 | 0.054 | -0.12 | -0   | 9550  | 9780  | 9730  | 10900 | 10700 | 10600 | 9800  | 10600 | 495.3 | 1482.8 | 3 | 0.0287 | 19.33 |
| Uncharacterized protein OS=Bos taurus GN=UBAP2 PE=4 SV=1    | tr E1BA82 E1BA82_BOVIN | dGSL<br>TNN<br>PYSG<br>DVTK                     | 64% | 35.9 | 54.11411 | Ref | 0.025 | -0.18 | 0.055 | -0.1  | 0.18  | -0.35 | 0.29 | 14400 | 12800 | 12000 | 15900 | 15700 | 16600 | 12000 | 18600 | 726   | 2175.1 | 3 | 0.0181 | 8.324 |
| Uncharacterized protein OS=Bos taurus GN=UBAP2 PE=4 SV=1    | tr E1BA82 E1BA82_BOVIN | ekPQ<br>ISAT<br>QAT<br>QLQ<br>k                 | 95% | 58.2 | 52.45041 | Ref | -0.46 | -0.11 | 0.074 | -0.06 | 0.49  | -0.48 | 0.2  | 2220  | 1320  | 1810  | 2320  | 2330  | 2970  | 1590  | 2520  | 861.8 | 2582.5 | 3 | 0.037  | 14.31 |

|                                                                                  |                                                                                                                                                                                                                      |              |     |     |      |          |     |       |     |       |        |       |      |       |       |      |       |      |       |       |       |       |       |        |   |        |       |
|----------------------------------------------------------------------------------|----------------------------------------------------------------------------------------------------------------------------------------------------------------------------------------------------------------------|--------------|-----|-----|------|----------|-----|-------|-----|-------|--------|-------|------|-------|-------|------|-------|------|-------|-------|-------|-------|-------|--------|---|--------|-------|
| Myosin regulatory light polypeptide 9<br>OS=Homo sapiens<br>GN=MYL9 PE=1<br>SV=4 | 4 MYL9_HUMAN,sp P29269 MYL9_PI G,sp Q5RBA4 MYL9_PONAB,sp Q64122 MYL9_RAT,sp Q9CQ19 MYL9_MOUSE,SE,tr A1L5B0 A1L5B0_BOVIN,tr A2AVY6 A2AVY6_MOUSE,tr B0BMS8 B0BMS8_RAT,tr D2H464 D2H464_AILME,tr F1MLA6 F1MLA6_BOVIN,tr | fTDE<br>EVDE | MYR | 62% | 28.4 | 47.27517 | Ref | -1.3  | 1.2 | -0.86 | -0.019 | -0.48 | 0.39 | -0.6  | 7990  | 2910 | 17300 | 4640 | 9190  | 5850  | 11200 | 5570  | 869.4 | 1736.8 | 2 | 0.0126 | 7.224 |
| Myosin regulatory light polypeptide 9<br>OS=Homo sapiens<br>GN=MYL9 PE=1<br>SV=4 | 4 MYL9_HUMAN,sp P29269 MYL9_PI G,sp Q5RBA4 MYL9_PONAB,sp Q64122 MYL9_RAT,sp Q9CQ19 MYL9_MOUSE,SE,tr A1L5B0 A1L5B0_BOVIN,tr A2AVY6 A2AVY6_MOUSE,tr B0BMS8 B0BMS8_RAT,tr D2H464 D2H464_AILME,tr F1MLA6 F1MLA6_BOVIN,tr | fTDE<br>EVDE | MYR | 95% | 47.2 | 47.47715 | Ref | -0.79 | 1.1 | -0.95 | -0.065 | -0.53 | 0.41 | -0.64 | 19400 | 9070 | 36500 | 9850 | 20100 | 12700 | 25500 | 12200 | 869.4 | 1736.8 | 2 | 0.0097 | 5.601 |

|                                                                                  |                                                                                                                                                                                                                           |                     |     |      |          |     |       |      |       |       |       |      |       |      |      |       |      |       |      |       |      |       |        |   |        |       |
|----------------------------------------------------------------------------------|---------------------------------------------------------------------------------------------------------------------------------------------------------------------------------------------------------------------------|---------------------|-----|------|----------|-----|-------|------|-------|-------|-------|------|-------|------|------|-------|------|-------|------|-------|------|-------|--------|---|--------|-------|
| Myosin regulatory light polypeptide 9<br>OS=Homo sapiens<br>GN=MYL9 PE=1<br>SV=4 | 4 MYL9_HUMAN,sp P29269 MYL9_PI G,sp Q5RBA4 MYL9_PONAB,sp Q64122 MYL9_RAT,sp Q9CQ19 MYL9_MOUSE,SE,tr A1L5B0 A1L5B0_BOVIN, tr A2AVY6 A2AVY6_MOUSE, tr B0BMS8 B0BMS8_RAT, tr D2H464 D2H464_AILME, tr F1MLA6 F1MLA6_BOVIN, tr | gNFn<br>YVEF<br>TR  | 80% | 35.4 | 50.23956 | Ref | -0.46 | 0.69 | -0.65 | 0.088 | -0.14 | 0.29 | -0.35 | 9630 | 6140 | 14700 | 6560 | 12000 | 8930 | 12600 | 8010 | 776.4 | 1550.8 | 2 | 0.0143 | 9.186 |
| Antithrombin-III<br>OS=Bos taurus<br>GN=SERPINC1 PE=1<br>SV=2                    | sp P41361 ANT3_BOVIN, tr F1MSZ6 F1MSZ6_BOVIN                                                                                                                                                                              | aTEG<br>QGS<br>EQk  | 92% | 44.6 | 52.66243 | Ref | 0.43  | 0.26 | 0.39  | 0.19  | -0.35 | 0.95 | -0.17 | 1910 | 2230 | 2160  | 2650 | 2540  | 1530 | 3910  | 1790 | 821.9 | 1641.9 | 2 | 0.0139 | 8.45  |
| Antithrombin-III<br>OS=Bos taurus<br>GN=SERPINC1 PE=1<br>SV=2                    | sp P41361 ANT3_BOVIN, tr F1MSZ6 F1MSZ6_BOVIN                                                                                                                                                                              | dIPV<br>NPM<br>clyR | 67% | 36.2 | 53.60722 | Ref | 0.47  | 0.15 | 0.29  | 0.27  | -0.09 | 0.73 | 0.043 | 2570 | 2950 | 2570  | 3170 | 3430  | 2340 | 4330  | 2660 | 659   | 1974   | 3 | 0.0171 | 8.671 |
| Antithrombin-III<br>OS=Bos taurus<br>GN=SERPINC1 PE=1<br>SV=2                    | sp P41361 ANT3_BOVIN, tr F1MSZ6 F1MSZ6_BOVIN                                                                                                                                                                              | kATE<br>GQG<br>SEQk | 59% | 34.3 | 53.44196 | Ref | 0.38  | 0.26 | 0.3   | 0.29  | -0.16 | 0.93 | -0.19 | 7020 | 8100 | 8090  | 9320 | 10200 | 6520 | 14500 | 6610 | 692.4 | 2074.2 | 3 | 0.006  | 2.911 |

|                                                                 |                                                                                                                        |              |     |      |          |     |        |       |       |        |       |       |       |       |       |       |       |       |       |       |       |       |        |   |        |       |
|-----------------------------------------------------------------|------------------------------------------------------------------------------------------------------------------------|--------------|-----|------|----------|-----|--------|-------|-------|--------|-------|-------|-------|-------|-------|-------|-------|-------|-------|-------|-------|-------|--------|---|--------|-------|
| L-lactate dehydrogenase B chain OS=Bos taurus GN=LDHB PE=2 SV=4 | sp Q5E9B1 LDHB_BOVIN, tr A0FH34 A0FH34_BO SMU, tr A0FH35 A0FH35_BO SMU, tr B0JYN3 B0JYN3_BOVIN, tr F1MRW3 F1MRW3_BOVIN | iHPV STM Vlk | 77% | 36   | 51.53824 | Ref | -0.071 | -0.24 | -0.09 | -0.19  | -0.16 | -0.17 | -0.17 | 7350  | 6080  | 5890  | 7330  | 7500  | 6680  | 6970  | 6890  | 810.5 | 1618.9 | 2 | 0.0209 | 12.88 |
| L-lactate dehydrogenase B chain OS=Bos taurus GN=LDHB PE=2 SV=4 | sp Q5E9B1 LDHB_BOVIN, tr A0FH34 A0FH34_BO SMU, tr A0FH35 A0FH35_BO SMU, tr B0JYN3 B0JYN3_BOVIN, tr F1MRW3 F1MRW3_BOVIN | sADT LWG IQk | 95% | 56.3 | 52.80917 | Ref | -0.23  | -0.15 | -0.15 | 0.01   | -0.23 | -0.05 | -0.27 | 15100 | 11300 | 13000 | 14600 | 18000 | 13300 | 15800 | 13400 | 864   | 1726   | 2 | 0.0176 | 10.16 |
| L-lactate dehydrogenase B chain OS=Bos taurus GN=LDHB PE=2 SV=4 | sp Q5E9B1 LDHB_BOVIN, tr A0FH34 A0FH34_BO SMU, tr A0FH35 A0FH35_BO SMU, tr B0JYN3 B0JYN3_BOVIN, tr F1MRW3 F1MRW3_BOVIN | sADT LWG IQk | 83% | 40.5 | 52.78267 | Ref | -0.37  | -0.23 | -0.14 | -8E-04 | -0.11 | -0.09 | -0.25 | 66100 | 42300 | 50700 | 60300 | 73400 | 59500 | 63000 | 56100 | 576.3 | 1726   | 3 | 0.0165 | 9.542 |

|                                                                                  |                                                                                                       |                             |     |      |          |     |        |       |      |        |       |       |       |       |       |       |       |       |       |       |       |       |        |   |        |       |
|----------------------------------------------------------------------------------|-------------------------------------------------------------------------------------------------------|-----------------------------|-----|------|----------|-----|--------|-------|------|--------|-------|-------|-------|-------|-------|-------|-------|-------|-------|-------|-------|-------|--------|---|--------|-------|
| Uncharacterized protein OS=Bos taurus<br>GN=Bt.101217 PE=4<br>SV=1               | tr E1B997 E1B997_BOVIN                                                                                | TLLES<br>QAQ<br>Wk          | 51% | 32.9 | 53.45629 | Ref | 0.47   | 0.045 | 0.21 | -0.014 | 0.11  | -0.26 | 0.057 | 4650  | 5380  | 4340  | 5450  | 5150  | 4890  | 3960  | 4900  | 604.7 | 1811   | 3 | 0.0129 | 7.093 |
| Uncharacterized protein OS=Bos taurus<br>GN=Bt.101217 PE=4<br>SV=1               | tr E1B997 E1B997_BOVIN                                                                                | TLLES<br>QAQ<br>Wk          | 76% | 38.3 | 53.61239 | Ref | 0.52   | -0.11 | 0.19 | -0.17  | 0.27  | -0.32 | 0.29  | 11600 | 15400 | 10800 | 14900 | 12800 | 15200 | 10600 | 15900 | 604.7 | 1811   | 3 | 0.0233 | 12.85 |
| Uncharacterized protein OS=Bos taurus<br>GN=Bt.101217 PE=4<br>SV=1               | tr E1B997 E1B997_BOVIN                                                                                | vPAV<br>APLE<br>GLTV<br>TLR | 95% | 48.4 | 48.5915  | Ref | 0.6    | -0.12 | 0.3  | -0.3   | 0.39  | -0.54 | 0.12  | 479   | 631   | 417   | 623   | 454   | 638   | 352   | 549   | 651.7 | 1952.2 | 3 | 0.0018 | 0.93  |
| Charged multivesicular body protein 4b OS=Mus musculus<br>GN=Chmp4b PE=2<br>SV=2 | sp Q9D8B3 CHM4B_MOUSE,<br>sp Q9H444 CHM4B_HUMAN,<br>tr F7H0S7 F7H0S7_MACMU,<br>tr Q08E32 Q08E32_BOVIN | aALQ<br>ALK                 | 87% | 35.7 | 45.57772 | Ref | -0.25  | -0.23 | 0.09 | -0.16  | 0.38  | -0.63 | 0.059 | 14800 | 10400 | 11500 | 16100 | 14900 | 18900 | 9800  | 15700 | 441.6 | 1321.9 | 3 | #####  | 0.165 |
| Charged multivesicular body protein 4b OS=Mus musculus<br>GN=Chmp4b PE=2<br>SV=2 | sp Q9D8B3 CHM4B_MOUSE,<br>sp Q9H444 CHM4B_HUMAN,<br>tr F7H0S7 F7H0S7_MACMU,<br>tr Q08E32 Q08E32_BOVIN | kIEQ<br>ELTA<br>Ak          | 73% | 33   | 48.91102 | Ref | -0.071 | -0.23 | -0   | 7E-05  | 0.066 | 0.014 | 0.01  | 9470  | 9700  | 9450  | 12400 | 13700 | 12500 | 12600 | 12500 | 681.8 | 2042.2 | 3 | 0.0021 | 1.017 |

|                                                                                                                   |                                                                                              |                 |     |      |          |     |       |                            |       |        |       |       |       |       |       |                            |       |       |       |       |       |       |        |   |        |       |
|-------------------------------------------------------------------------------------------------------------------|----------------------------------------------------------------------------------------------|-----------------|-----|------|----------|-----|-------|----------------------------|-------|--------|-------|-------|-------|-------|-------|----------------------------|-------|-------|-------|-------|-------|-------|--------|---|--------|-------|
| Charged multivesicular body protein 4b OS=Mus musculus GN=Chmp4b PE=2 SV=2                                        | sp Q9D8B3 CHM4B_MOUSE, sp Q9H444 CHM4B_HUMAN, tr F7H0S7 F7H0S7_MACMU, tr Q08E32 Q08E32_BOVIN | IFGA GGG k      | 62% | 31.1 | 49.60247 | Ref | -0.37 | Value Missing (-2.7189023) | 0.13  | -0.021 | 0.55  | -0.47 | 0.57  | 13800 | 9320  | Value Missing (-2.7189023) | 15900 | 15900 | 20600 | 10600 | 21600 | 438.9 | 1313.8 | 3 | 0.0035 | 2.676 |
| Small inducible cytokine subfamily E, member 1 (Endothelial monocyte-activating) OS=Bos taurus GN=SCYE1 PE=2 SV=2 | tr Q3ZBX5 Q3ZBX5_BOVIN                                                                       | aEIQ nGV k      | 79% | 36.2 | 51.3313  | Ref | 0.071 | -0.22                      | 0.062 | -0.035 | 0.2   | -0.3  | 0.061 | 25000 | 23500 | 20800                      | 28400 | 29300 | 30000 | 22300 | 28300 | 734.4 | 1466.9 | 2 | 0.0038 | 2.557 |
| Small inducible cytokine subfamily E, member 1 (Endothelial monocyte-activating) OS=Bos taurus GN=SCYE1 PE=2 SV=2 | tr Q3ZBX5 Q3ZBX5_BOVIN                                                                       | mVV LLcN LkPA k | 82% | 36.1 | 48.964   | Ref | 0.084 | -0.4                       | 0.2   | -0.062 | 0.029 | -0.23 | 0.14  | 1210  | 1120  | 867                        | 1480  | 1360  | 1260  | 1100  | 1410  | 763.1 | 2286.4 | 3 | 0.0022 | 0.963 |

|                                                                                                                   |                                                                          |                                |     |      |          |     |                        |                         |                        |                         |                          |                        |                          |                 |                        |                         |                           |                        |                         |                            |                          |       |        |   |        |       |
|-------------------------------------------------------------------------------------------------------------------|--------------------------------------------------------------------------|--------------------------------|-----|------|----------|-----|------------------------|-------------------------|------------------------|-------------------------|--------------------------|------------------------|--------------------------|-----------------|------------------------|-------------------------|---------------------------|------------------------|-------------------------|----------------------------|--------------------------|-------|--------|---|--------|-------|
| Small inducible cytokine subfamily E, member 1 (Endothelial monocyte-activating) OS=Bos taurus GN=SCYE1 PE=2 SV=2 | tr Q3ZBX5 Q3ZBX5_BOVIN                                                   | qQP VAG SADS kPVD VSR          | 67% | 37   | 54.46916 | Ref | 0.035                  | -0.37                   | 0.23                   | -0.16                   | 0.27                     | -0.32                  | -0.09                    | 4170            | 3440                   | 2820                    | 4790                      | 4050                   | 4750                    | 3300                       | 3840                     | 783.8 | 2348.3 | 3 | 0.0151 | 6.438 |
| Huntingtin-interacting protein K (Predicted) OS=Sorex araneus GN=HYPK PE=4 SV=1                                   | tr B3RF13 B3RF13_SORAR, tr B5SNJ9 B5SNJ9_OT OGA, tr B7NZF4 B7NZF4_RA BIT | aTEG DVEL ELET ETSG PERP PEKPR | 72% | 38.9 | 55.09746 | Ref | No Values (0.20238991) | No Values (0.084696814) | No Values (0.08189808) | No Values (-0.22237726) | No Values (-0.026504943) | No Values (0.08927164) | No Values (-0.07839756)  | No Values (0.0) | No Values (0.20238991) | No Values (0.084696814) | No Values (-0.0818980826) | No Values (-0.2223773) | No Values (0.026504943) | No Values (-0.0892716456)  | No Values (-0.07839756)  | 1038  | 3111.5 | 3 | 0.0192 | 6.177 |
| Huntingtin-interacting protein K (Predicted) OS=Sorex araneus GN=HYPK PE=4 SV=1                                   | tr B3RF13 B3RF13_SORAR, tr B5SNJ9 B5SNJ9_OT OGA, tr B7NZF4 B7NZF4_RA BIT | eHM GNV VEAL IALT N            | 95% | 55.2 | 53.5776  | Ref | No Values (0.20238991) | No Values (0.08469649)  | No Values (0.08189826) | No Values (-0.2223773)  | No Values (-0.02650503)  | No Values (0.08927173) | No Values (-0.078397736) | No Values (0.0) | No Values (0.20238991) | No Values (0.08469649)  | No Values (-0.0818982636) | No Values (-0.2223773) | No Values (0.02650503)  | No Values (-0.08927173736) | No Values (-0.078397736) | 958   | 1914   | 2 | 0.0093 | 4.837 |





|                                                                         |                                                                                                                                                                                                                |              |     |      |          |     |                            |       |       |       |      |     |     |     |                            |     |     |     |      |      |      |       |        |   |        |       |
|-------------------------------------------------------------------------|----------------------------------------------------------------------------------------------------------------------------------------------------------------------------------------------------------------|--------------|-----|------|----------|-----|----------------------------|-------|-------|-------|------|-----|-----|-----|----------------------------|-----|-----|-----|------|------|------|-------|--------|---|--------|-------|
| Cellular nucleic acid binding protein OS=Mus musculus GN=Cnbp PE=2 SV=2 | 6 CNBP_MOUSE,sp P62633 CNBP_HUMAN,sp P62634 CNBP_RA_T,sp Q3T0Q6 CNBP_BOVIN,sp Q5R5R5 CNBP_PONAB,tr A8K7V4 A8K7V4_HUMAN,tr A9XHW5 A9XHW5_CRIGR,tr B4DP17 B4DP17_HUMAN,tr D0G6R9 D0G6R9_PIG,tr D2H7C8 D2H7C8_AIL | ecTIE<br>ATA | 84% | 32.7 | 45.82881 | Ref | Value Missing (-1.0797033) | -0.46 | 0.15  | -0.17 | 0.4  | 1.3 | 2.5 | 478 | Value Missing (-1.0797033) | 489 | 836 | 738 | 957  | 1840 | 4290 | 594.3 | 1186.5 | 2 | 0.0123 | 10.36 |
| Cellular nucleic acid binding protein OS=Mus musculus GN=Cnbp PE=2 SV=2 | 6 CNBP_MOUSE,sp P62633 CNBP_HUMAN,sp P62634 CNBP_RA_T,sp Q3T0Q6 CNBP_BOVIN,sp Q5R5R5 CNBP_PONAB,tr A8K7V4 A8K7V4_HUMAN,tr A9XHW5 A9XHW5_CRIGR,tr B4DP17 B4DP17_HUMAN,tr D0G6R9 D0G6R9_PIG,tr D2H7C8 D2H7C8_AIL | ecTIE<br>ATA | 80% | 31.2 | 45.89458 | Ref | Value Missing (-1.276297)  | -0.12 | -0.35 | -0.82 | 0.59 | 1.6 | 2.3 | 846 | Value Missing (-1.276297)  | 731 | 702 | 559 | 1300 | 2760 | 4520 | 594.3 | 1186.5 | 2 | 0.0107 | 9.027 |

|                                                                                                             |                                                                                                                                                                                                                               |                                                      |            |             |                 |            |             |             |             |              |             |              |             |              |             |              |              |              |              |             |              |              |               |          |               |              |
|-------------------------------------------------------------------------------------------------------------|-------------------------------------------------------------------------------------------------------------------------------------------------------------------------------------------------------------------------------|------------------------------------------------------|------------|-------------|-----------------|------------|-------------|-------------|-------------|--------------|-------------|--------------|-------------|--------------|-------------|--------------|--------------|--------------|--------------|-------------|--------------|--------------|---------------|----------|---------------|--------------|
| <p>Microtubule-associated protein RP/EB family member 1<br/>OS=Homo sapiens<br/>GN=MAPRE1 PE=1<br/>SV=3</p> | <p>sp Q15691 MARE1_HUMAN,<br/>sp Q5R7Z5 MARE1_PONAB, tr B4DM33 B4DM33_HUMAN, tr D2H827 D2H8Z7_AILME, tr E2QYH4 E2QYH4_CANFA, tr F6SAB2 F6SAB2_HORSE, tr F7A401 F7A401_CALJA, tr F7GS88 F7GS88_MACMU, tr Q2XVP5 Q2XVP5_PIG</p> | <p>ITVE<br/>DLEK</p>                                 | <p>68%</p> | <p>34.5</p> | <p>52.1301</p>  | <p>Ref</p> | <p>0.2</p>  | <p>0.12</p> | <p>0.39</p> | <p>0.094</p> | <p>0.28</p> | <p>-0.15</p> | <p>0.11</p> | <p>13200</p> | <p>9770</p> | <p>10100</p> | <p>13600</p> | <p>12200</p> | <p>12200</p> | <p>9410</p> | <p>11200</p> | <p>778</p>   | <p>1553.9</p> | <p>2</p> | <p>0.0083</p> | <p>5.327</p> |
| <p>Microtubule-associated protein RP/EB family member 1<br/>OS=Homo sapiens<br/>GN=MAPRE1 PE=1<br/>SV=3</p> | <p>sp Q15691 MARE1_HUMAN,<br/>sp Q5R7Z5 MARE1_PONAB, tr B4DM33 B4DM33_HUMAN, tr D2H827 D2H8Z7_AILME, tr E2QYH4 E2QYH4_CANFA, tr F6SAB2 F6SAB2_HORSE, tr F7A401 F7A401_CALJA, tr F7GS88 F7GS88_MACMU, tr Q2XVP5 Q2XVP5_PIG</p> | <p>qGQ<br/>ETAV<br/>APSL<br/>VAP<br/>ALNK<br/>Pk</p> | <p>76%</p> | <p>33.4</p> | <p>50.51118</p> | <p>Ref</p> | <p>0.32</p> | <p>0.14</p> | <p>0.22</p> | <p>0.075</p> | <p>0.21</p> | <p>0.26</p>  | <p>0.29</p> | <p>2850</p>  | <p>3100</p> | <p>2970</p>  | <p>3530</p>  | <p>3510</p>  | <p>3370</p>  | <p>3640</p> | <p>3690</p>  | <p>733.7</p> | <p>2930.7</p> | <p>4</p> | <p>0.0282</p> | <p>9.617</p> |

|                                                                                                             |                                                                                                                                                                                                                               |                                                      |            |             |                 |            |              |              |              |               |              |              |              |              |              |              |              |              |              |              |              |              |               |          |               |              |
|-------------------------------------------------------------------------------------------------------------|-------------------------------------------------------------------------------------------------------------------------------------------------------------------------------------------------------------------------------|------------------------------------------------------|------------|-------------|-----------------|------------|--------------|--------------|--------------|---------------|--------------|--------------|--------------|--------------|--------------|--------------|--------------|--------------|--------------|--------------|--------------|--------------|---------------|----------|---------------|--------------|
| <p>Microtubule-associated protein RP/EB family member 1<br/>OS=Homo sapiens<br/>GN=MAPRE1 PE=1<br/>SV=3</p> | <p>sp Q15691 MARE1_HUMAN,<br/>sp Q5R7Z5 MARE1_PONAB, tr B4DM33 B4DM33_HUMAN, tr D2H8Z7 D2H8Z7_AILME, tr E2QYH4 E2QYH4_CANFA, tr F6SAB2 F6SAB2_HORSE, tr F7A401 F7A401_CALJA, tr F7GS88 F7GS88_MACMU, tr Q2XVP5 Q2XVP5_PIG</p> | <p>qGQ<br/>ETAV<br/>APSL<br/>VAP<br/>ALNk<br/>Pk</p> | <p>95%</p> | <p>54.7</p> | <p>50.20046</p> | <p>Ref</p> | <p>0.12</p>  | <p>0.073</p> | <p>0.49</p>  | <p>0.008</p>  | <p>0.52</p>  | <p>0.012</p> | <p>0.28</p>  | <p>864</p>   | <p>855</p>   | <p>899</p>   | <p>1350</p>  | <p>1060</p>  | <p>1330</p>  | <p>973</p>   | <p>1160</p>  | <p>977.9</p> | <p>2930.7</p> | <p>3</p> | <p>0.0229</p> | <p>7.803</p> |
| <p>Clathrin light chain A<br/>OS=Mus musculus<br/>GN=Clta PE=1 SV=1</p>                                     | <p>5 CLCA_MOUSE, sp P04973 CLCA_BOVIN, sp P08081 CLCA_RAT, sp P09496 CLCA_HUMAN, tr B1AWD8 B1AWD8_MOUSE, tr B1AWD9 B1AWD9_MOUSE, tr B1AWE0 B1AWE0_MOUSE, tr B1AWE1 B1AWE1_MOUSE, tr B4DIN1 B4DIN1_HUMAN, tr B5ATG0 B5AT</p>   | <p>IEAL<br/>DAn<br/>SR</p>                           | <p>95%</p> | <p>51.1</p> | <p>52.2626</p>  | <p>Ref</p> | <p>-0.22</p> | <p>-0.12</p> | <p>-0.26</p> | <p>-0.048</p> | <p>0.088</p> | <p>-0.65</p> | <p>-0.15</p> | <p>34000</p> | <p>25400</p> | <p>29600</p> | <p>30100</p> | <p>38400</p> | <p>36800</p> | <p>23100</p> | <p>32400</p> | <p>647.3</p> | <p>1292.7</p> | <p>2</p> | <p>0.0119</p> | <p>9.222</p> |



|                                                 |                                                                                                |                   |     |      |          |     |       |       |       |       |       |       |       |       |       |       |       |       |       |       |       |       |        |   |        |       |
|-------------------------------------------------|------------------------------------------------------------------------------------------------|-------------------|-----|------|----------|-----|-------|-------|-------|-------|-------|-------|-------|-------|-------|-------|-------|-------|-------|-------|-------|-------|--------|---|--------|-------|
| Uncharacterized protein OS=Bos taurus PE=4 SV=1 | tr E1B8S4 E1B8S4_BOVIN, tr E1BLH2 E1BLH2_BOVIN, tr F1MEQ6 F1MEQ6_BOVIN, tr F1MRV2 F1MRV2_BOVIN | g IPH LVTH DAR    | 84% | 38.7 | 52.40619 | Ref | 0.032 | -0.04 | 0.039 | -0.33 | 0.19  | -0.21 | -0.23 | 16800 | 14900 | 15400 | 18300 | 15600 | 19500 | 15500 | 15100 | 380.7 | 1518.8 | 4 | 0.0098 | 6.42  |
| Uncharacterized protein OS=Bos taurus PE=4 SV=1 | tr E1B8S4 E1B8S4_BOVIN, tr E1BLH2 E1BLH2_BOVIN, tr F1MEQ6 F1MEQ6_BOVIN, tr F1MRV2 F1MRV2_BOVIN | g IPH LVTH DAR    | 87% | 40.1 | 52.51823 | Ref | 0.29  | 0.047 | -0.14 | -0.42 | -0.02 | -0.18 | -0.38 | 10100 | 9610  | 8810  | 8700  | 7910  | 9110  | 8480  | 7340  | 380.7 | 1518.8 | 4 | 0.008  | 5.289 |
| Uncharacterized protein OS=Bos taurus PE=4 SV=1 | tr E1B8S4 E1B8S4_BOVIN, tr E1BLH2 E1BLH2_BOVIN, tr F1MEQ6 F1MEQ6_BOVIN, tr F1MRV2 F1MRV2_BOVIN | v ND TIQI DLET GK | 88% | 44   | 53.82523 | Ref | 0.32  | -0.19 | 0.064 | -0.22 | -0.11 | -0.15 | -0.11 | 5090  | 6170  | 4720  | 6310  | 5710  | 5400  | 5460  | 5580  | 685.4 | 2053.1 | 3 | 0.0151 | 7.334 |

|                                                                                              |                                                                                                                                                                                                                  |                                        |     |      |          |     |       |       |       |        |       |       |       |      |      |      |      |      |      |      |      |       |      |   |        |       |
|----------------------------------------------------------------------------------------------|------------------------------------------------------------------------------------------------------------------------------------------------------------------------------------------------------------------|----------------------------------------|-----|------|----------|-----|-------|-------|-------|--------|-------|-------|-------|------|------|------|------|------|------|------|------|-------|------|---|--------|-------|
| Ubiquitin carboxyl-terminal hydrolase isozyme L1<br>OS=Homo sapiens<br>GN=UCHL1 PE=1<br>SV=2 | 6 UCHL1_HUMAN,sp P23356 UCHL1_BOVIN,sp Q60HC8 UCHL1_MACFA,sp Q6SEG5 UCHL1_PIG,sp Q9GM50 UCHL1_HORSE,tr A6NLJ7 A6NLJ7_HUMAN,tr B2RD14 B2RD14_HUMAN,tr D6R956 D6R956_HUMAN,tr D6R974 D6R974_HUMAN,tr D6RBT8 D6RBT8 | nEAI<br>QAA<br>HDA<br>VAQ<br>EGQ<br>cR | 95% | 77.6 | 50.81117 | Ref | -0.35 | -0.19 | -0.45 | -0.084 | -0.52 | 0.027 | -0.38 | 6900 | 4720 | 5720 | 5340 | 7600 | 4890 | 7480 | 5590 | 754.4 | 2260 | 3 | 0.0174 | 7.71  |
| Ubiquitin carboxyl-terminal hydrolase isozyme L1<br>OS=Homo sapiens<br>GN=UCHL1 PE=1<br>SV=2 | 6 UCHL1_HUMAN,sp P23356 UCHL1_BOVIN,sp Q60HC8 UCHL1_MACFA,sp Q6SEG5 UCHL1_PIG,sp Q9GM50 UCHL1_HORSE,tr A6NLJ7 A6NLJ7_HUMAN,tr B2RD14 B2RD14_HUMAN,tr D6R956 D6R956_HUMAN,tr D6R974 D6R974_HUMAN,tr D6RBT8 D6RBT8 | nEAI<br>QAA<br>HDA<br>VAQ<br>EGQ<br>cR | 95% | 76.9 | 50.86563 | Ref | -0.28 | -0.05 | -0.55 | -0.14  | -0.4  | -0.04 | -0.45 | 7190 | 5210 | 6660 | 5260 | 7740 | 5620 | 7530 | 5630 | 754.4 | 2260 | 3 | 0.016  | 7.073 |

|                                                                                           |                                                                                                                                                                                                                      |                                      |     |      |          |     |       |       |       |        |                            |       |       |       |       |       |       |       |                            |       |       |       |        |   |        |       |
|-------------------------------------------------------------------------------------------|----------------------------------------------------------------------------------------------------------------------------------------------------------------------------------------------------------------------|--------------------------------------|-----|------|----------|-----|-------|-------|-------|--------|----------------------------|-------|-------|-------|-------|-------|-------|-------|----------------------------|-------|-------|-------|--------|---|--------|-------|
| Ubiquitin carboxyl-terminal hydrolase isozyme L1<br>OS=Homo sapiens<br>GN=UCHL1 PE=1 SV=2 | 6 UCHL1_HUMAN,sp P23356 UCHL1_BOVIN,sp Q60HC8 UCHL1_MACFA,sp Q6SEG5 UCHL1_PIG,sp Q9GM50 UCHL1_HORSE,tr A6NLJ7 A6NLJ7_HUMAN, tr B2RD14 B2RD14_HUMAN, tr D6R956 D6R956_HUMAN, tr D6R974 D6R974_HUMAN, tr D6RBT8 D6RBT8 | qFLS ETEK                            | 62% | 31   | 50.00629 | Ref | -0.35 | -0.12 | -0.57 | -0.12  | -0.79                      | 0.27  | -0.6  | 670   | 422   | 537   | 443   | 667   | 366                        | 798   | 431   | 634.8 | 1267.6 | 2 | 0.0176 | 13.84 |
| Actin-like protein (Fragment)<br>OS=Homo sapiens<br>GN=ACT PE=2 SV=1                      | tr Q562Z4 Q562Z4_HUMAN                                                                                                                                                                                               | tTGI VMD SGD GVT HTV PIYK GYAL PHAIR | 61% | 35.3 | 55.93386 | Ref | 0.12  | -0.59 | -0.11 | -0.071 | Value Missing (-1.5767647) | 0.42  | -0.11 | 164   | 155   | 103   | 161   | 183   | Value Missing (-1.5767647) | 235   | 161   | 872.5 | 3485.8 | 4 | 0.0797 | 22.87 |
| Actin-like protein (Fragment)<br>OS=Homo sapiens<br>GN=ACT PE=2 SV=1                      | tr Q562Z4 Q562Z4_HUMAN                                                                                                                                                                                               | vAPE EHP VLLT EAPL NPK               | 72% | 36.4 | 52.74303 | Ref | -0.12 | -0.21 | -0.21 | -0.2   | -0.24                      | 0.067 | -0.58 | 29200 | 20300 | 20800 | 23200 | 25900 | 21900                      | 28300 | 18000 | 854.8 | 2561.5 | 3 | 0.005  | 1.946 |

|                                                                             |                                               |                                    |     |      |          |     |        |       |       |        |       |       |       |       |       |       |       |       |       |       |       |       |        |   |        |       |
|-----------------------------------------------------------------------------|-----------------------------------------------|------------------------------------|-----|------|----------|-----|--------|-------|-------|--------|-------|-------|-------|-------|-------|-------|-------|-------|-------|-------|-------|-------|--------|---|--------|-------|
| Actin-like protein (Fragment)<br>OS=Homo sapiens<br>GN=ACT PE=2 SV=1        | tr Q562Z4 Q562Z4_HUMAN                        | vAPE<br>EHP<br>VLLT<br>EAPL<br>NPK | 95% | 70.1 | 53.32305 | Ref | -0.16  | -0.12 | -0.17 | -0.098 | -0.2  | 0.069 | -0.43 | 2420  | 2020  | 2260  | 2450  | 2830  | 2310  | 2900  | 2030  | 1282  | 2561.4 | 2 | 0.0197 | 7.704 |
| Prolyl 4-hydroxylase subunit alpha-1<br>OS=Bos taurus<br>GN=P4HA1 PE=1 SV=1 | sp Q1RMU3 P4HA1_BOVIN, tr A6QL77 A6QL77_BOVIN | gAA<br>VDYL<br>PER                 | 60% | 32.8 | 51.97215 | Ref | -0.015 | 0.51  | -0.15 | 0.027  | -0.49 | 0.58  | -0.49 | 18600 | 16800 | 26300 | 18700 | 23200 | 14100 | 31000 | 14700 | 697.9 | 1393.7 | 2 | 0.0118 | 8.474 |
| Prolyl 4-hydroxylase subunit alpha-1<br>OS=Bos taurus<br>GN=P4HA1 PE=1 SV=1 | sp Q1RMU3 P4HA1_BOVIN, tr A6QL77 A6QL77_BOVIN | sSSD<br>DQS<br>DQk                 | 72% | 34.6 | 51.04705 | Ref | -0.18  | 0.87  | -0.48 | -0.14  | -0.74 | 0.84  | -1    | 7280  | 5570  | 12500 | 5520  | 7700  | 4430  | 13900 | 3770  | 569   | 1703.8 | 3 | 0.0128 | 7.512 |
| Prolyl 4-hydroxylase subunit alpha-1<br>OS=Bos taurus<br>GN=P4HA1 PE=1 SV=1 | sp Q1RMU3 P4HA1_BOVIN, tr A6QL77 A6QL77_BOVIN | sSSD<br>DQS<br>DQk                 | 95% | 46.3 | 51.04705 | Ref | -0.27  | 0.85  | -0.63 | 0.021  | -0.64 | 0.78  | -0.94 | 2450  | 1700  | 4000  | 1620  | 2800  | 1540  | 4330  | 1300  | 852.9 | 1703.8 | 2 | 0.0128 | 7.503 |
| Uncharacterized protein OS=Equus caballus<br>GN=Eca.4103 PE=4 SV=1          | tr F7D6B3 F7D6B3_HORSE                        | qLLL<br>ESQS<br>QLD<br>AAk         | 78% | 38.3 | 52.91806 | Ref | -0.065 | -0.17 | -0.23 | -0.22  | -0.21 | -0.26 | -0.16 | 5570  | 5090  | 5120  | 5520  | 6120  | 5380  | 5430  | 5790  | 718.1 | 2151.2 | 3 | 0.0091 | 4.244 |



|                                                                                                    |                        |             |     |      |          |     |        |       |       |        |       |       |       |       |       |       |       |       |       |       |       |       |        |   |        |       |
|----------------------------------------------------------------------------------------------------|------------------------|-------------|-----|------|----------|-----|--------|-------|-------|--------|-------|-------|-------|-------|-------|-------|-------|-------|-------|-------|-------|-------|--------|---|--------|-------|
| Uncharacterized protein OS=Equus caballus GN=Eca.4103 PE=4 SV=1                                    | tr F7D6B3 F7D6B3_HORSE | qNA ELAK    | 55% | 31   | 50.99802 | Ref | -0.27  | -0.19 | -0.25 | -0.21  | -0.14 | -0.21 | -0.21 | 9370  | 6740  | 7730  | 8340  | 9480  | 8670  | 8630  | 8570  | 691.4 | 1380.8 | 2 | 0.0215 | 15.54 |
| Uncharacterized protein OS=Equus caballus GN=Eca.4103 PE=4 SV=1                                    | tr F7D6B3 F7D6B3_HORSE | sEGT PNQ Gk | 80% | 37.9 | 52.69782 | Ref | -0.43  | -0.06 | -0.16 | -0.22  | 0.029 | -0.48 | -0.26 | 10700 | 6720  | 9440  | 9860  | 10400 | 10800 | 7930  | 9200  | 763.4 | 1524.8 | 2 | 0.0051 | 3.342 |
| Nuclear ubiquitous casein and cyclin-dependent kinases substrate OS=Bos taurus GN=NUCKS1 PE=2 SV=1 | sp Q29S11 NUCKS1_BOVIN | aTVT PSPV k | 61% | 30.1 | 49.2139  | Ref | -0.31  | -0.01 | -0.07 | 0.037  | 0.19  | -0.18 | -0.11 | 16700 | 12700 | 17000 | 18300 | 21800 | 21000 | 17100 | 17700 | 754.5 | 1506.9 | 2 | 0.0057 | 3.793 |
| Nuclear ubiquitous casein and cyclin-dependent kinases substrate OS=Bos taurus GN=NUCKS1 PE=2 SV=1 | sp Q29S11 NUCKS1_BOVIN | aTVT PSPV k | 91% | 43.3 | 50.27639 | Ref | -0.028 | -0.1  | -0.15 | -0.007 | -0.01 | -0.19 | -0.06 | 21500 | 18300 | 18900 | 20400 | 24900 | 21700 | 20000 | 21800 | 503.3 | 1506.9 | 3 | 0.0235 | 15.59 |

|                                                                                                    |                                                                                                                                                                                                                             |                                     |     |      |          |     |        |       |      |        |      |       |      |      |      |      |      |      |      |      |      |       |        |   |        |       |
|----------------------------------------------------------------------------------------------------|-----------------------------------------------------------------------------------------------------------------------------------------------------------------------------------------------------------------------------|-------------------------------------|-----|------|----------|-----|--------|-------|------|--------|------|-------|------|------|------|------|------|------|------|------|------|-------|--------|---|--------|-------|
| Nuclear ubiquitous casein and cyclin-dependent kinases substrate OS=Bos taurus GN=NUCKS1 PE=2 SV=1 | sp Q29S11 NUCKS_BOVIN                                                                                                                                                                                                       | ekTP<br>SPkE<br>EDEE<br>PESP<br>LEK | 74% | 37.6 | 55.41645 | Ref | -0.74  | -0.36 | 0.13 | -0.003 | 0.48 | -0.66 | 0.17 | 4440 | 2280 | 3200 | 5050 | 5080 | 6190 | 2940 | 5170 | 854.5 | 3413.8 | 4 | 0.0211 | 6.19  |
| 40S ribosomal protein S9 OS=Bos taurus GN=RPS9 PE=2 SV=1                                           | 5 RS9_BOVIN,sp A9L913 RS9_PAPAN,sp P29314 RS9_RAT,sp P46781 RS9_HUMAN,sp Q6ZWN5 RS9_MOUSE,tr A9C4C1 A9C4C1_HUMAN,tr B0VXI8 B0VXI8_CALJA,tr B2KIM3 B2KIM3_RHIFE,tr B3RFF7 B3RFF7_SO RAR,tr B5FWB6 B5FWB6_OT OGA,tr B7NZS8 B7 | kGQ<br>GGA<br>GAG<br>DDE<br>EED     | 95% | 63.8 | 50.28067 | Ref | -0.028 | 0.16  | 0.25 | 0.12   | 0.33 | -0.17 | 0.18 | 7250 | 6190 | 7620 | 9110 | 9210 | 9310 | 6870 | 8700 | 681.7 | 2041.9 | 3 | 0.0178 | 8.694 |

|                                                          |                                                                                                                                                                                                                                       |                                 |     |      |          |     |       |       |      |        |       |       |       |      |      |      |      |      |      |      |      |       |        |   |        |       |
|----------------------------------------------------------|---------------------------------------------------------------------------------------------------------------------------------------------------------------------------------------------------------------------------------------|---------------------------------|-----|------|----------|-----|-------|-------|------|--------|-------|-------|-------|------|------|------|------|------|------|------|------|-------|--------|---|--------|-------|
| 40S ribosomal protein S9 OS=Bos taurus GN=RPS9 PE=2 SV=1 | 5 RS9_BOVIN,sp A9L913 RS9_PAPAN,sp P29314 RS9_RAT,sp P46781 RS9_HUMAN,sp Q6ZWN5 RS9_MOUSE,trans A9C4C1 A9C4C1_HUMAN,trans B0VXI8 CALJA,trans B2KIM3 B2KIM3_RHIFE,trans B3RFF7 B3RFF7_SO RAR,trans B5FWB6 B5FWB6_OTOGA,trans B7N2S8 B7 | kGQ<br>GGA<br>GAG<br>DDE<br>EED | 95% | 47.3 | 50.3527  | Ref | -0.21 | 0.16  | 0.53 | 0.094  | 0.3   | -0.39 | 0.065 | 4580 | 3070 | 4290 | 6220 | 5070 | 5090 | 3310 | 4500 | 1022  | 2041.9 | 2 | 0.016  | 7.82  |
| 40S ribosomal protein S9 OS=Bos taurus GN=RPS9 PE=2 SV=1 | 5 RS9_BOVIN,sp A9L913 RS9_PAPAN,sp P29314 RS9_RAT,sp P46781 RS9_HUMAN,sp Q6ZWN5 RS9_MOUSE,trans A9C4C1 A9C4C1_HUMAN,trans B0VXI8 CALJA,trans B2KIM3 B2KIM3_RHIFE,trans B3RFF7 B3RFF7_SO RAR,trans B5FWB6 B5FWB6_OTOGA,trans B7N2S8 B7 | kQV<br>VNIP<br>SFIV<br>R        | 52% | 27.7 | 48.07075 | Ref | 0.42  | -0.27 | 0.39 | -0.011 | 0.053 | 0.061 | 0.16  | 4850 | 5670 | 3810 | 6750 | 5650 | 5150 | 5410 | 5740 | 670.1 | 2007.2 | 3 | 0.0102 | 5.075 |

|                                                                                                       |                                                                                                                                                                                                                                  |                                          |     |      |          |     |      |      |      |       |       |       |       |       |       |       |       |       |       |       |       |       |        |   |        |       |
|-------------------------------------------------------------------------------------------------------|----------------------------------------------------------------------------------------------------------------------------------------------------------------------------------------------------------------------------------|------------------------------------------|-----|------|----------|-----|------|------|------|-------|-------|-------|-------|-------|-------|-------|-------|-------|-------|-------|-------|-------|--------|---|--------|-------|
| Voltage-dependent<br>anion-selective<br>channel protein 1<br>OS=Homo sapiens<br>GN=VDAC1 PE=1<br>SV=2 | 6 VDAC1_HUMAN,sp P45879 VDAC1_BOVIN,sp Q60932 VDAC1_MOUSE,sp Q9M216 VDAC1_PIG,sp Q9TT15 VDAC1_RABIT,sp Q9Z2L0 VDAC1_RAT,trans B2LYK9 B2LYK9_SH EEP,trans B3KTS5 B3KTS5_HUMAN,trans B4DEI3 B4DEI3_HUMAN,trans E7ER14 E7ER14_HUMAN | gYGF<br>GLJK                             | 51% | 29.9 | 50.62093 | Ref | 0.88 | 0.34 | 0.32 | -0.13 | 0.096 | -0.09 | -0.01 | 10200 | 16300 | 12100 | 13400 | 10800 | 11100 | 10200 | 10600 | 731.9 | 1461.9 | 2 | 0.0046 | 3.158 |
| Voltage-dependent<br>anion-selective<br>channel protein 1<br>OS=Homo sapiens<br>GN=VDAC1 PE=1<br>SV=2 | 6 VDAC1_HUMAN,sp P45879 VDAC1_BOVIN,sp Q60932 VDAC1_MOUSE,sp Q9M216 VDAC1_PIG,sp Q9TT15 VDAC1_RABIT,sp Q9Z2L0 VDAC1_RAT,trans B2LYK9 B2LYK9_SH EEP,trans B3KTS5 B3KTS5_HUMAN,trans B4DEI3 B4DEI3_HUMAN,trans E7ER14 E7ER14_HUMAN | vNN<br>SSLI<br>GLG<br>YTQT<br>LkPG<br>ik | 95% | 47.8 | 48.83707 | Ref | 0.62 | 0.12 | 0.31 | 0.019 | 0.011 | 0.26  | 0.13  | 1310  | 1570  | 1210  | 1550  | 1400  | 1210  | 1510  | 1370  | 754.7 | 3014.8 | 4 | 0.0111 | 3.678 |

|                                                                                                 |                                                                                                                                                                                                               |                              |      |     |      |          |     |      |       |      |       |      |       |       |      |      |      |      |      |      |      |      |       |        |   |        |       |
|-------------------------------------------------------------------------------------------------|---------------------------------------------------------------------------------------------------------------------------------------------------------------------------------------------------------------|------------------------------|------|-----|------|----------|-----|------|-------|------|-------|------|-------|-------|------|------|------|------|------|------|------|------|-------|--------|---|--------|-------|
| Voltage-dependent anion-selective channel protein 1<br>OS=Homo sapiens<br>GN=VDAC1 PE=1<br>SV=2 | 6 VDAC1_HUMAN,sp P45879 VDAC1_BOVIN,sp Q60932 VDAC1_MOUSE,sp Q9MZ16 VDAC1_PIG,sp Q9TT15 VDAC1_RABIT,sp Q9Z2LO VDAC1_RAT,tr B2LYK9 B2LYK9_SH EEP,tr B3KTS5 B3KTS5_HUMAN,tr B4DEI3 B4DEI3_HUMAN,tr E7ER14_HUMAN | vnNS<br>SLIG<br>LGYT<br>QTLk | PGIK | 86% | 37.9 | 50.83062 | Ref | 0.7  | -0.01 | 0.35 | -0.14 | 0.27 | 0.3   | 0.21  | 3680 | 5870 | 3900 | 5590 | 4400 | 5100 | 5440 | 5100 | 754.9 | 3015.7 | 4 | 0.0279 | 9.262 |
| Uncharacterized protein (Fragment)<br>OS=Equus caballus<br>GN=TOR1AIP2 PE=4<br>SV=1             | tr F6U4U7 F6U4U7_HORSE                                                                                                                                                                                        | aAV                          | VHR  | 91% | 42.1 | 48.39918 | Ref | 0.25 | 0.046 | 0.48 | -0.25 | 0.63 | -0.52 | -0.26 | 3800 | 3570 | 3370 | 5120 | 3390 | 5450 | 2570 | 3060 | 319.5 | 955.58 | 3 | 0.0036 | 3.735 |
| Uncharacterized protein (Fragment)<br>OS=Equus caballus<br>GN=TOR1AIP2 PE=4<br>SV=1             | tr F6U4U7 F6U4U7_HORSE                                                                                                                                                                                        | aAV                          | VHR  | 89% | 39.7 | 48.35062 | Ref | 0.34 | -0.15 | 0.65 | -0.59 | 0.75 | -0.46 | -0.17 | 4600 | 5410 | 4170 | 8160 | 3810 | 8390 | 3800 | 4620 | 319.5 | 955.59 | 3 | 0.0017 | 1.791 |

|                                                                                     |                                                                                                                                                                                                                                      |                          |     |      |          |     |       |      |       |        |       |       |      |       |       |       |       |       |       |       |       |       |        |   |        |       |
|-------------------------------------------------------------------------------------|--------------------------------------------------------------------------------------------------------------------------------------------------------------------------------------------------------------------------------------|--------------------------|-----|------|----------|-----|-------|------|-------|--------|-------|-------|------|-------|-------|-------|-------|-------|-------|-------|-------|-------|--------|---|--------|-------|
| Uncharacterized protein (Fragment)<br>OS=Equus caballus<br>GN=TOR1AIP2 PE=4<br>SV=1 | tr F6U4U7 F6U4U7_HORSE                                                                                                                                                                                                               | iSHL<br>VLPV<br>QPV<br>R | 66% | 30.4 | 48.04705 | Ref | 0.26  | 0.2  | 0.098 | -0.038 | 0.16  | 0.078 | 0.1  | 3030  | 3150  | 3280  | 3430  | 3440  | 3450  | 3400  | 3430  | 554.7 | 1661   | 3 | 0.0065 | 3.923 |
| Prolyl 4-hydroxylase subunit alpha-2<br>OS=Mus musculus<br>GN=P4ha2 PE=2<br>SV=1    | 6 P4HA2_MOUSE, tr B5FW61 B5FW61_OTOGA, tr C3PT80 C3PT80_DASNO, tr D2GVH1 D2GVH1_AILME, tr F1MJQ4 F1MJQ4_BOVIN, tr F6PQC1 F6PQC1_HORSE, tr F6PQW4 F6PQW4_HORSE, tr Q3SYY3 Q3SYY3_BOVIN, tr Q5SX74 Q5SX74_MOUSE, tr Q5SX75 Q5SX75_QSLK | dLV                      | 59% | 32.2 | 51.58378 | Ref | -0.18 | 0.27 | -0.25 | -0.24  | -0.63 | 0.064 | -0.5 | 22800 | 16500 | 24500 | 19200 | 21300 | 14200 | 24000 | 16100 | 705.9 | 1409.8 | 2 | 0.0232 | 16.42 |



|                                                                                |                                            |                         |     |      |          |     |        |       |       |        |       |       |       |      |      |      |      |      |      |      |      |       |        |   |        |       |
|--------------------------------------------------------------------------------|--------------------------------------------|-------------------------|-----|------|----------|-----|--------|-------|-------|--------|-------|-------|-------|------|------|------|------|------|------|------|------|-------|--------|---|--------|-------|
| Serine/threonine-protein kinase PAK2 OS=Rattus norvegicus GN=Pak2 PE=1 SV=1    | sp Q64303 PAK2_RAT, tr F1S2QW0 F1S2QW0_PIG | iISIFS<br>STEK          | 71% | 34.8 | 51.40024 | Ref | 0.13   | -0.2  | 0.3   | -0.24  | -0.16 | -0.15 | 0.26  | 3710 | 4080 | 3510 | 5590 | 4240 | 3900 | 4120 | 5410 | 578.3 | 1732   | 3 | 0.0027 | 1.548 |
| Serine/threonine-protein kinase PAK2 OS=Rattus norvegicus GN=Pak2 PE=1 SV=1    | sp Q64303 PAK2_RAT, tr F1S2QW0 F1S2QW0_PIG | iISIFS<br>STEK          | 85% | 40.3 | 51.94733 | Ref | -0.21  | -0.2  | 0.1   | -0.11  | 0.066 | -0.26 | 0.28  | 2420 | 1690 | 1840 | 2550 | 2420 | 2390 | 1990 | 2870 | 578.3 | 1732   | 3 | 0.0138 | 7.988 |
| Serine/threonine-protein kinase PAK2 OS=Rattus norvegicus GN=Pak2 PE=1 SV=1    | sp Q64303 PAK2_RAT, tr F1S2QW0 F1S2QW0_PIG | KNP<br>QAV<br>LDVL<br>k | 78% | 33.2 | 47.53124 | Ref | -0.048 | 0.015 | -0.03 | -0.047 | 0.057 | -0.05 | -0.05 | 5420 | 4560 | 5170 | 5640 | 6130 | 5750 | 5570 | 5510 | 713.1 | 2136.3 | 3 | 0.0265 | 12.38 |
| SRA stem-loop-interacting RNA-binding protein OS=Ovis aries GN=SLIRP PE=4 SV=1 | tr B9VGZ7 B9VGZ7_SHEEP                     | eHF<br>AQF<br>GHV<br>R  | 75% | 35.6 | 51.71589 | Ref | -0.12  | 0.15  | 0.23  | 0.15   | 0.4   | -0.07 | 0.41  | 6470 | 4420 | 5760 | 6840 | 7180 | 7450 | 5610 | 7760 | 766.4 | 1530.8 | 2 | 0.0116 | 7.552 |



|                                                                                         |                                                                                                                                                                                                                      |                        |     |      |          |     |        |       |      |       |      |       |      |       |      |      |       |       |       |      |       |       |        |   |        |       |
|-----------------------------------------------------------------------------------------|----------------------------------------------------------------------------------------------------------------------------------------------------------------------------------------------------------------------|------------------------|-----|------|----------|-----|--------|-------|------|-------|------|-------|------|-------|------|------|-------|-------|-------|------|-------|-------|--------|---|--------|-------|
| SRA stem-loop-interacting RNA-binding protein<br>OS=Ovis aries<br>GN=SLIRP PE=4<br>SV=1 | tr B9VGZ7 B9VGZ7_SHEEP                                                                                                                                                                                               | eHF<br>AQF<br>GHV<br>R | 88% | 40.5 | 51.7302  | Ref | -0.006 | 0.022 | 0.44 | -0.14 | 0.53 | -0.57 | 0.77 | 10200 | 8870 | 9820 | 14700 | 10800 | 15100 | 7340 | 18500 | 383.7 | 1530.8 | 4 | 0.0103 | 6.698 |
| SRA stem-loop-interacting RNA-binding protein<br>OS=Ovis aries<br>GN=SLIRP PE=4<br>SV=1 | tr B9VGZ7 B9VGZ7_SHEEP                                                                                                                                                                                               | kIPW<br>TAAS<br>GELR   | 71% | 35.6 | 52.14592 | Ref | 0.2    | 0.095 | 0.28 | 0.16  | 0.41 | 0.018 | 0.26 | 6970  | 6950 | 7020 | 8940  | 9060  | 9440  | 7510 | 8820  | 646.4 | 1936.1 | 3 | 0.0111 | 5.73  |
| 60S ribosomal protein L26<br>OS=Rattus norvegicus<br>GN=Rpl26 PE=1<br>SV=1              | 9 RL26_RAT,sp P61254 RL26_HUMAN,sp P61255 RL26_MOUSE,sp P61256 RL26_MACFA,sp P61257 RL26_BOVIN,sp A6NE05 A6NE05_HUMAN,sp B1AR_A3 B1AR_A3_MOUSE,sp B1AR_A5 B1AR_A5_MOUSE,sp D4A12 D4A12_RAT,sp E2QUE7 E2QUE7_CAN,sp F | hFN<br>APS<br>HIR      | 86% | 38.9 | 51.86386 | Ref | 0.39   | 0.083 | 0.94 | 0.09  | 1.2  | 0.084 | 0.9  | 5150  | 6030 | 5280 | 10700 | 6570  | 12100 | 5960 | 10400 | 346.4 | 1381.7 | 4 | 0.0113 | 8.137 |

|                                                                            |                                                                                                                                                                                                                                     |                   |     |      |          |     |      |      |      |      |      |      |      |       |       |       |       |       |       |       |       |       |        |   |        |       |
|----------------------------------------------------------------------------|-------------------------------------------------------------------------------------------------------------------------------------------------------------------------------------------------------------------------------------|-------------------|-----|------|----------|-----|------|------|------|------|------|------|------|-------|-------|-------|-------|-------|-------|-------|-------|-------|--------|---|--------|-------|
| 60S ribosomal protein L26<br>OS=Rattus norvegicus<br>GN=Rpl26 PE=1<br>SV=1 | 9 RL26_R<br>AT,sp P61254 RL26_HUMAN,sp P61255 RL26_MOUSE,sp P61256 RL26_MACFA,sp P61257 RL26_BOVIN,tr A6NE05 A6NE05_HUMAN,tr B1AR A3 B1AR A3_MOUSE, E,tr B1AR A5 B1AR A5_MOUSE, E,tr D4A1Z2 D4A1Z2_RAT,tr E2QUE7 E2QUE7_C ANFA,tr F | hFN<br>APS<br>HIR | 89% | 41.2 | 51.90475 | Ref | 0.48 | 0.11 | 0.95 | 0.16 | 1.1  | -0.1 | 0.91 | 1850  | 2240  | 1880  | 3770  | 2410  | 4050  | 1840  | 3680  | 346.4 | 1381.7 | 4 | 0.0077 | 5.562 |
| 60S ribosomal protein L26<br>OS=Rattus norvegicus<br>GN=Rpl26 PE=1<br>SV=1 | 9 RL26_R<br>AT,sp P61254 RL26_HUMAN,sp P61255 RL26_MOUSE,sp P61256 RL26_MACFA,sp P61257 RL26_BOVIN,tr A6NE05 A6NE05_HUMAN,tr B1AR A3 B1AR A3_MOUSE, E,tr B1AR A5 B1AR A5_MOUSE, E,tr D4A1Z2 D4A1Z2_RAT,tr E2QUE7 E2QUE7_C ANFA,tr F | kIMS<br>SPLS      | 62% | 32.2 | 50.73014 | Ref | 0.37 | 0.43 | 0.68 | 0.5  | 0.67 | 0.54 | 0.79 | 11600 | 12300 | 13900 | 18500 | 18000 | 17700 | 17000 | 20100 | 635.1 | 1902.1 | 3 | 0.0345 | 18.12 |

|                                                                         |                                                                                                                                                                                                                              |            |     |      |          |     |      |      |      |       |      |       |      |      |       |       |       |       |       |       |       |       |        |   |        |       |
|-------------------------------------------------------------------------|------------------------------------------------------------------------------------------------------------------------------------------------------------------------------------------------------------------------------|------------|-----|------|----------|-----|------|------|------|-------|------|-------|------|------|-------|-------|-------|-------|-------|-------|-------|-------|--------|---|--------|-------|
| 60S ribosomal protein L13a<br>OS=Mus musculus<br>GN=Rpl13a PE=1<br>SV=4 | 3 RL13A_MOUSE,sp P40429 RL13A_HUMAN,sp Q3SZ90 RL13A_BOVIN,sp Q4R8Z2 RL13A_MAL13A_MA_CFA,sp Q5RA38 RL13A_PONAB,sp Q95307 RL13A_PIG,sp Q9XSU0 RL13A_CANFA,tr D2H7V7 D2H7V7_AILME,tr E2RLF4 E2RLF4_CANFA,tr E9Q5A0 E9Q5A0_MOUSE | gHLL<br>GR | 74% | 32.7 | 48.52327 | Ref | 0.3  | 0.35 | 0.78 | -0.16 | 0.69 | -0.04 | 0.18 | 9880 | 10600 | 11900 | 18000 | 10300 | 16200 | 10200 | 11800 | 319.5 | 955.57 | 3 | 0.0124 | 12.99 |
| 60S ribosomal protein L13a<br>OS=Mus musculus<br>GN=Rpl13a PE=1<br>SV=4 | 3 RL13A_MOUSE,sp P40429 RL13A_HUMAN,sp Q3SZ90 RL13A_BOVIN,sp Q4R8Z2 RL13A_MAL13A_MA_CFA,sp Q5RA38 RL13A_PONAB,sp Q95307 RL13A_PIG,sp Q9XSU0 RL13A_CANFA,tr D2H7V7 D2H7V7_AILME,tr E2RLF4 E2RLF4_CANFA,tr E9Q5A0 E9Q5A0_MOUSE | gHLL<br>GR | 81% | 34.9 | 48.35062 | Ref | 0.43 | 0.28 | 0.83 | -0.11 | 0.59 | -0.04 | 0.18 | 5320 | 6550  | 6380  | 10500 | 6060  | 8530  | 5780  | 6700  | 319.5 | 955.59 | 3 | 0.0018 | 1.888 |

|                                                                         |                                                                                                                                                                                                                        |                                          |     |      |          |     |        |       |       |        |       |       |       |       |       |       |       |       |       |       |       |       |        |   |        |       |
|-------------------------------------------------------------------------|------------------------------------------------------------------------------------------------------------------------------------------------------------------------------------------------------------------------|------------------------------------------|-----|------|----------|-----|--------|-------|-------|--------|-------|-------|-------|-------|-------|-------|-------|-------|-------|-------|-------|-------|--------|---|--------|-------|
| 60S ribosomal protein L13a<br>OS=Mus musculus<br>GN=Rpl13a PE=1<br>SV=4 | 3 RL13A_MOUSE,sp P40429 RL13A_HUMAN,sp Q35Z90 RL13A_BOVIN,sp Q4R8Z2 RL13A_MALCFA,sp Q5RA38 RL13A_PONAB,sp Q95307 RL13A_PIG,sp Q9XSU0 RL13A_CANFNA,tr D2H7V7 D2H7V7_AILME,tr E2RLF4 E2RLF4_CANFA,tr E9Q5A0 E9Q5A0_MOUSE | mVV<br>PAAL<br>k                         | 75% | 33.2 | 48.54743 | Ref | 0.32   | 0.099 | 0.51  | 0.2    | 0.37  | 0.26  | 0.33  | 6940  | 6290  | 5850  | 8700  | 7770  | 7640  | 7370  | 7700  | 479.6 | 1435.9 | 3 | 0.0247 | 17.16 |
| MCG124046<br>OS=Mus musculus<br>GN=Prss1 PE=2<br>SV=1                   | tr Q9Z1R9 Q9Z1R9_MOUSE                                                                                                                                                                                                 | IGEH<br>NinV<br>LEG<br>NEQ<br>FIDA<br>Ak | 88% | 43.7 | 55.27145 | Ref | -0.031 | -0.33 | 0.024 | -0.05  | 0.075 | -0    | 0.48  | 65900 | 56100 | 49600 | 71000 | 74300 | 70800 | 70100 | 97300 | 705.9 | 2819.5 | 4 | 0.0045 | 1.601 |
| MCG124046<br>OS=Mus musculus<br>GN=Prss1 PE=2<br>SV=1                   | tr Q9Z1R9 Q9Z1R9_MOUSE                                                                                                                                                                                                 | IGEH<br>NinV<br>LEG<br>NEQ<br>FIDA<br>Ak | 78% | 38.8 | 55.33054 | Ref | 0.077  | -0.13 | -0.04 | -0.028 | 0.095 | -0.22 | 0.41  | 10000 | 8960  | 8430  | 10100 | 11200 | 10600 | 8900  | 13800 | 705.9 | 2819.5 | 4 | 0.0196 | 6.962 |
| MCG124046<br>OS=Mus musculus<br>GN=Prss1 PE=2<br>SV=1                   | tr Q9Z1R9 Q9Z1R9_MOUSE                                                                                                                                                                                                 | tLnN<br>DIML<br>ik                       | 59% | 33.2 | 52.27625 | Ref | 0.88   | -0.18 | -0.04 | -0.26  | -0.1  | -0.06 | -0.18 | 2590  | 4570  | 2380  | 2950  | 2800  | 2730  | 2910  | 2660  | 595.3 | 1783   | 3 | 0.013  | 7.308 |

|                                                          |                                                                                                                                                                                                                            |      |     |      |          |     |      |       |      |        |       |      |      |       |       |      |       |       |       |       |       |       |        |   |        |       |
|----------------------------------------------------------|----------------------------------------------------------------------------------------------------------------------------------------------------------------------------------------------------------------------------|------|-----|------|----------|-----|------|-------|------|--------|-------|------|------|-------|-------|------|-------|-------|-------|-------|-------|-------|--------|---|--------|-------|
| 40S ribosomal protein S7 OS=Bos taurus GN=RPS7 PE=2 SV=1 | 9 RS7_BOVIN,sp P62081 RS7_HUMAN,sp P62082 RS7_MOUSE,sp P62083 RS7_RAT,sp Q5RT64 RS7_FELCA,tr B5DEL9 B5DEL9_RAT,tr B5MCP9 B5MCP9_HUMAN,tr D2I2A9 D2I2A9_AILME,tr E2R8A8 E2R8A8_CANFA,tr F66SVV1 F6SVV1_MOUSE,tr F6Y6J2 F6Y6 | hVVF | 71% | 34   | 50.4093  | Ref | 0.45 | -0.09 | 0.6  | -0.028 | 0.025 | 0.14 | 0.39 | 7880  | 9980  | 7460 | 13500 | 9630  | 8720  | 9870  | 11600 | 425.3 | 1272.8 | 3 | 0.0083 | 6.527 |
| 40S ribosomal protein S7 OS=Bos taurus GN=RPS7 PE=2 SV=1 | 9 RS7_BOVIN,sp P62081 RS7_HUMAN,sp P62082 RS7_MOUSE,sp P62083 RS7_RAT,sp Q5RT64 RS7_FELCA,tr B5DEL9 B5DEL9_RAT,tr B5MCP9 B5MCP9_HUMAN,tr D2I2A9 D2I2A9_AILME,tr E2R8A8 E2R8A8_CANFA,tr F66SVV1 F6SVV1_MOUSE,tr F6Y6J2 F6Y6 | hVVF | 74% | 34.6 | 50.21731 | Ref | 0.71 | -0.24 | 0.52 | -0.032 | 0.086 | 0.11 | 0.18 | 12100 | 17100 | 9600 | 18300 | 13800 | 13000 | 13900 | 14500 | 425.3 | 1272.8 | 3 | 0.008  | 6.315 |

|                                                                                |                                                                                                                                                                                                                                   |                       |     |      |          |     |      |      |       |        |       |       |       |     |     |     |     |     |     |     |     |       |        |   |        |       |
|--------------------------------------------------------------------------------|-----------------------------------------------------------------------------------------------------------------------------------------------------------------------------------------------------------------------------------|-----------------------|-----|------|----------|-----|------|------|-------|--------|-------|-------|-------|-----|-----|-----|-----|-----|-----|-----|-----|-------|--------|---|--------|-------|
| 40S ribosomal protein S7 OS=Bos taurus GN=RPS7 PE=2 SV=1                       | 9 RS7_BOVIN,sp P62081 RS7_HUMAN,sp P62082 RS7_MOUSE,sp P62083 RS7_RAT,sp Q5RT64 RS7_FELCA,tr B5DEL9 B5DEL9_RAT,tr B5MCP9 B5MCP9_HUMAN,tr D2I2A9 D2I2A9_AILME,tr E2R8A8 E2R8A8_CANFA,tr F6SVV1 F6SVV1_MOUSE, tr F6Y6I2 F6Y6        | kAIII<br>FVPV<br>PQLK | 79% | 23.2 | 39.08646 | Ref | 0.28 | 0.46 | 0.27  | -0.058 | -0.08 | 0.29  | 0.3   | 665 | 690 | 847 | 834 | 733 | 631 | 849 | 851 | 595.4 | 2377.5 | 4 | 0.0353 | 14.83 |
| Heterogeneous nuclear ribonucleoprotein G OS=Pan troglodytes GN=RBMX PE=2 SV=1 | M3 HNRPG_PANTR,sp P38159 HNRPG_HUMAN, tr A2AFI3 A2AFI3_MOUSE, tr C0SSX0 C0SSX0_9MURI, tr D2HD91 D2HD91_AILME, tr D3JUI8 D3JUI8_BOVIN, tr F1RQ90 F1RQ90_PIG, tr F6XJB9 F6XJB9_HORSE, tr F7EC60 F7EC60_CALJA, tr F7HGT3 F7HGT3_CALJ | iVEV<br>LLMk          | 77% | 33.6 | 48.37134 | Ref | 0.29 | 0.17 | -0.52 | -0.51  | -0.48 | -0.02 | -0.07 | 774 | 819 | 823 | 571 | 634 | 564 | 814 | 780 | 518.3 | 1552   | 3 | 0.0102 | 6.564 |

|                                                                                |                                                                                                                                                                                                                                   |             |     |      |          |     |       |       |       |       |       |       |       |       |       |       |       |       |       |       |       |       |        |   |       |       |
|--------------------------------------------------------------------------------|-----------------------------------------------------------------------------------------------------------------------------------------------------------------------------------------------------------------------------------|-------------|-----|------|----------|-----|-------|-------|-------|-------|-------|-------|-------|-------|-------|-------|-------|-------|-------|-------|-------|-------|--------|---|-------|-------|
| Heterogeneous nuclear ribonucleoprotein G OS=Pan troglodytes GN=RBMX PE=2 SV=1 | M3 HNRPG_PANTR,sp P38159 HNRPG_HUMAN, tr A2AFI3 A2AFI3_MOUSE, tr COSSX0 COSSX0_9MURI, tr D2HD91 D2HD91_AILME, tr D3JUI8 D3JUI8_BOVIN, tr F1RQ90 F1RQ90_PIG, tr F6XJB9 F6XJB9_HORSE, tr F7EC60 F7EC60_CALJA, tr F7HGT3 F7HGT3_CALJ | iVEV        | 88% | 37.6 | 47.36604 | Ref | -0.13 | -0.13 | -0.21 | -0.27 | -0.53 | -0.18 | 0.18  | 1010  | 681   | 742   | 787   | 828   | 606   | 804   | 1030  | 518.3 | 1552   | 3 | ##### | 0.073 |
|                                                                                | M3 HNRPG_PANTR,sp P38159 HNRPG_HUMAN, tr A2AFI3 A2AFI3_MOUSE, tr COSSX0 COSSX0_9MURI, tr D2HD91 D2HD91_AILME, tr D3JUI8 D3JUI8_BOVIN, tr F1RQ90 F1RQ90_PIG, tr F6XJB9 F6XJB9_HORSE, tr F7EC60 F7EC60_CALJA, tr F7HGT3 F7HGT3_CALJ | rEPL<br>PSR | 52% | 29.2 | 49.56903 | Ref | -0.17 | 0.32  | -0.09 | -0.32 | -0    | -0.47 | -0.11 | 28900 | 25500 | 38800 | 32800 | 30900 | 33500 | 25400 | 32200 | 386.9 | 1157.7 | 3 | 0.013 | 11.22 |

|                                                                     |                        |                                                   |     |      |          |     |       |       |       |       |       |      |       |      |      |      |      |      |      |      |      |       |        |   |        |       |
|---------------------------------------------------------------------|------------------------|---------------------------------------------------|-----|------|----------|-----|-------|-------|-------|-------|-------|------|-------|------|------|------|------|------|------|------|------|-------|--------|---|--------|-------|
| Intercellular adhesion molecule-1 OS=Ovis aries GN=ICAM-1 PE=2 SV=1 | tr O97692 O97692_SHEEP | kLQT<br>YVLP<br>STDP<br>HLEA<br>PPV<br>VEV<br>GSR | 75% | 36.7 | 53.96074 | Ref | -0.28 | -1.4  | 0.059 | -0.42 | -0.37 | -1.4 | 0.23  | 3590 | 2960 | 1440 | 4560 | 3610 | 3250 | 1720 | 5140 | 836   | 3339.8 | 4 | 0.0201 | 6.027 |
| Intercellular adhesion molecule-1 OS=Ovis aries GN=ICAM-1 PE=2 SV=1 | tr O97692 O97692_SHEEP | kLQT<br>YVLP<br>STDP<br>HLEA<br>PPV<br>VEV<br>GSR | 75% | 36.6 | 53.99857 | Ref | -0.46 | -1.2  | -0.19 | -0.35 | -0.16 | -1.1 | -0.01 | 736  | 466  | 303  | 685  | 674  | 670  | 372  | 774  | 836   | 3339.8 | 4 | 0.0216 | 6.47  |
| Intercellular adhesion molecule-1 OS=Ovis aries GN=ICAM-1 PE=2 SV=1 | tr O97692 O97692_SHEEP | qPV<br>GKEE<br>PAEV<br>TFM<br>VQP<br>R            | 73% | 39   | 55.10313 | Ref | -0.71 | -0.82 | 0.041 | -0.31 | -0.69 | -1.2 | -0.07 | 5030 | 2280 | 2300 | 4670 | 4050 | 2700 | 1970 | 4330 | 884.1 | 2649.4 | 3 | 0.0242 | 9.116 |



|                                                                          |                                                                                                                                                                                                                                                                                                                                    |                    |     |      |          |     |       |       |       |       |       |       |       |      |      |      |      |      |      |       |      |       |        |   |        |       |
|--------------------------------------------------------------------------|------------------------------------------------------------------------------------------------------------------------------------------------------------------------------------------------------------------------------------------------------------------------------------------------------------------------------------|--------------------|-----|------|----------|-----|-------|-------|-------|-------|-------|-------|-------|------|------|------|------|------|------|-------|------|-------|--------|---|--------|-------|
| Elongation factor 1-<br>gamma OS=Equus<br>caballus GN=EEF1G<br>PE=2 SV=1 | 7 EF1G_H<br>ORSE,sp <br>P29694 E<br>F1G_RABI<br>T,sp Q3SZ<br>V3 EF1G_<br>BOVIN,sp<br> Q4R7H5<br> EF1G_M<br>ACFA,tr D<br>2HS91 D2<br>HS91_AIL<br>ME,tr F1<br>MG05 F1<br>MG05_BO<br>VIN,tr F7<br>HML3 F7<br>HML3_M<br>ACMU,tr <br>F7IIA5 F7<br>IIA5_CALJ<br>A,tr F7IIA<br>9 F7IIA9_<br>CALJA,tr <br>Q1JPA2 <br>Q1JPA2_B<br>OVIN,tr Q | aVLG<br>Evk        | 66% | 31.4 | 49.06782 | Ref | 0.017 | -0.35 | -0.22 | -0.26 | -0.33 | 0.12  | -0.21 | 9600 | 8640 | 7260 | 8920 | 9550 | 7940 | 11300 | 8970 | 442   | 1322.8 | 3 | 0.0044 | 3.299 |
| Elongation factor 1-<br>gamma OS=Equus<br>caballus GN=EEF1G<br>PE=2 SV=1 | 7 EF1G_H<br>ORSE,sp <br>P29694 E<br>F1G_RABI<br>T,sp Q3SZ<br>V3 EF1G_<br>BOVIN,sp<br> Q4R7H5<br> EF1G_M<br>ACFA,tr D<br>2HS91 D2<br>HS91_AIL<br>ME,tr F1<br>MG05 F1<br>MG05_BO<br>VIN,tr F7<br>HML3 F7<br>HML3_M<br>ACMU,tr <br>F7IIA5 F7<br>IIA5_CALJ<br>A,tr F7IIA<br>9 F7IIA9_<br>CALJA,tr <br>Q1JPA2 <br>Q1JPA2_B<br>OVIN,tr Q | iLGLL<br>DAH<br>Lk | 80% | 33.1 | 46.90763 | Ref | 0.3   | -0.54 | -0.2  | -0.18 | -0.47 | 0.032 | -0.34 | 3730 | 4000 | 2420 | 3450 | 3850 | 2740 | 4060  | 3110 | 567.7 | 1700.1 | 3 | #####  | 0.169 |

|                                                                                                   |                                                                                                                                                                                                                                                                                                                                    |              |    |     |      |          |     |      |       |       |      |       |       |       |      |      |      |      |      |      |      |      |       |        |   |        |       |
|---------------------------------------------------------------------------------------------------|------------------------------------------------------------------------------------------------------------------------------------------------------------------------------------------------------------------------------------------------------------------------------------------------------------------------------------|--------------|----|-----|------|----------|-----|------|-------|-------|------|-------|-------|-------|------|------|------|------|------|------|------|------|-------|--------|---|--------|-------|
| Elongation factor 1-gamma OS=Equus caballus GN=EEF1G PE=2 SV=1                                    | 7 EF1G_H<br>ORSE,sp <br>P29694 E<br>F1G_RABI<br>T,sp Q3SZ<br>V3 EF1G_<br>BOVIN,sp<br> Q4R7H5<br> EF1G_M<br>ACFA,tr D<br>2HS91 D2<br>HS91_AIL<br>ME,tr F1<br>MG05 F1<br>MG05_BO<br>VIN,tr F7<br>HML3 F7<br>HML3_M<br>ACMU,tr <br>F7IIA5 F7<br>IIA5_CALJ<br>A,tr F7IIA<br>9 F7IIA9_<br>CALJA,tr <br>Q1JPA2 <br>Q1JPA2_B<br>OVIN,tr Q | iLGLL<br>DAH | Lk | 70% | 30.8 | 47.68082 | Ref | 0.1  | -0.31 | -0.09 | -0.3 | -0.36 | 0.052 | -0.41 | 832  | 771  | 629  | 819  | 784  | 655  | 912  | 657  | 567.7 | 1700.1 | 3 | 0.0107 | 6.306 |
| Eukaryotic translation initiation factor 2 subunit 2 OS=Oryctolagus cuniculus GN=EIF2S2 PE=1 SV=1 | sp P4103<br>5 IF2B_R<br>ABIT,sp Q<br>5E9D0 IF<br>2B_BOVIN<br>,tr D2H43<br>1 D2H431<br>_AILME,tr<br> F1P247 <br>F1P247_C<br>ANFA,tr F<br>1S4Y8 F1<br>S4Y8_PIG,<br>tr F7DE88<br> F7DE88_<br>HORSE                                                                                                                                    | dYTY<br>EELL | NR | 69% | 33.6 | 51.16611 | Ref | 0.26 | -0.11 | 0.4   | 0.21 | 0.45  | -0.22 | 0.48  | 5560 | 5930 | 4960 | 7960 | 7690 | 7920 | 5180 | 8380 | 810.4 | 1618.8 | 2 | 0.0133 | 8.198 |

|                                                                                                   |                                                                                                                                          |                      |     |      |          |     |        |       |      |       |      |       |       |      |      |      |      |      |       |      |       |       |        |   |        |       |
|---------------------------------------------------------------------------------------------------|------------------------------------------------------------------------------------------------------------------------------------------|----------------------|-----|------|----------|-----|--------|-------|------|-------|------|-------|-------|------|------|------|------|------|-------|------|-------|-------|--------|---|--------|-------|
| Eukaryotic translation initiation factor 2 subunit 2 OS=Oryctolagus cuniculus GN=EIF2S2 PE=1 SV=1 | sp P41035 IF2B_RABIT,sp Q5E9D0 IF2B_BOVIN, tr D2H431 D2H431_AILME, tr F1PZ47 F1PZ47_C ANFA, tr F1S4Y8 F1S4Y8_PIG, tr F7DE88 F7DE88_HORSE | dYTYEELLNR           | 55% | 31.2 | 51.26271 | Ref | 0.38   | -0.34 | 0.21 | 0.3   | 0.4  | 0.14  | 0.37  | 4820 | 5460 | 3580 | 5920 | 6950 | 6470  | 5650 | 6600  | 810.4 | 1618.8 | 2 | 0.0122 | 7.519 |
| Eukaryotic translation initiation factor 2 subunit 2 OS=Oryctolagus cuniculus GN=EIF2S2 PE=1 SV=1 | sp P41035 IF2B_RABIT,sp Q5E9D0 IF2B_BOVIN, tr D2H431 D2H431_AILME, tr F1PZ47 F1PZ47_C ANFA, tr F1S4Y8 F1S4Y8_PIG, tr F7DE88 F7DE88_HORSE | eVEPEPTEDKDVEADEEDSR | 73% | 36.5 | 52.39727 | Ref | 0.14   | 0.08  | 0.28 | 0.12  | 0.49 | -0.33 | 0.35  | 9570 | 7290 | 7570 | 9760 | 9610 | 10900 | 6410 | 10200 | 976.1 | 2925.4 | 3 | 0.0257 | 8.78  |
| Uncharacterized protein OS=Monodelphis domestica GN=PDIA4 PE=3 SV=1                               | tr F6SNH9 F6SNH9_MONDO                                                                                                                   | fDVTGYPTLk           | 78% | 38.4 | 52.92885 | Ref | -0.019 | 0.037 | -0.1 | -0.12 | -0.2 | 0.21  | -0.18 | 5310 | 4560 | 5140 | 5240 | 5700 | 4720  | 6540 | 4960  | 583.7 | 1748   | 3 | 0.0072 | 4.117 |

|                                                                              |                                                                                                                                                                                                                           |             |     |      |          |     |        |       |      |        |       |       |       |       |       |       |       |       |       |       |       |       |        |   |        |       |
|------------------------------------------------------------------------------|---------------------------------------------------------------------------------------------------------------------------------------------------------------------------------------------------------------------------|-------------|-----|------|----------|-----|--------|-------|------|--------|-------|-------|-------|-------|-------|-------|-------|-------|-------|-------|-------|-------|--------|---|--------|-------|
| Uncharacterized protein<br>OS=Monodelphis domestica<br>GN=PDIA4 PE=3<br>SV=1 | tr F6SNH9 F6SNH9_MONDO                                                                                                                                                                                                    | nLVI<br>Ak  | 57% | 25.3 | 45.07694 | Ref | -0.065 | -0.05 | 0.03 | -0.099 | -0.03 | -0.19 | 0.027 | 19800 | 16100 | 17700 | 20900 | 21100 | 19400 | 18000 | 20800 | 633.4 | 1264.8 | 2 | 0.0028 | 2.202 |
| Uncharacterized protein<br>OS=Monodelphis domestica<br>GN=PDIA4 PE=3<br>SV=1 | tr F6SNH9 F6SNH9_MONDO                                                                                                                                                                                                    | nLVI<br>Ak  | 62% | 26.6 | 45.07694 | Ref | 0.32   | -0.08 | -0.2 | -0.45  | 0.061 | -0.01 | -0.07 | 5880  | 6470  | 5300  | 5500  | 5080  | 6330  | 6300  | 6000  | 422.6 | 1264.8 | 3 | 0.0026 | 2.088 |
| Cytochrome c<br>OS=Equus caballus<br>GN=CYCS PE=1<br>SV=2                    | 4 CYC_HORSE,sp P00007 CYC_HIPAM,sp P00008 CYC_RABBIT,sp P00011 CYC_CANFA,sp P00012 CYC_MIRLE,sp P00013 CYC_MINSC,sp P62894 CYC_BOVIN,sp P62895 CYC_PIG,sp P62896 CYC_SHEEP,sp P62897 CYC_MOUSE,sp P62898 CYC_RAT,sp P6809 | mIFA<br>Gik | 59% | 30.6 | 49.70375 | Ref | -0.21  | 0.33  | 0.25 | 0.38   | 0.74  | 0.092 | 0.87  | 6260  | 4620  | 7300  | 7750  | 9350  | 10500 | 6990  | 11900 | 463.3 | 1386.9 | 3 | 0.0018 | 1.289 |

|                                                           |                                                                                                                                                                                                                                                                                                                                  |                     |     |      |          |     |       |      |      |      |      |       |      |      |      |       |       |       |       |       |       |       |        |   |        |       |
|-----------------------------------------------------------|----------------------------------------------------------------------------------------------------------------------------------------------------------------------------------------------------------------------------------------------------------------------------------------------------------------------------------|---------------------|-----|------|----------|-----|-------|------|------|------|------|-------|------|------|------|-------|-------|-------|-------|-------|-------|-------|--------|---|--------|-------|
| Cytochrome c<br>OS=Equus caballus<br>GN=CYCS PE=1<br>SV=2 | 4 CYC_H<br>ORSE,sp <br>P00007 C<br>YC_HIPA<br>M,sp P00<br>008 CYC_<br>RABIT,sp <br>P00011 C<br>YC_CANF<br>A,sp P000<br>12 CYC_<br>MIRLE,sp <br>P00013 C<br>YC_MINS<br>C,sp P628<br>94 CYC_B<br>OVIN,sp <br>P62895 C<br>YC_PIG,sp<br> P62896 <br>CYC_SHEE<br>P,sp P628<br>97 CYC_<br>MOUSE,s<br>p P62898<br> CYC_RAT<br>,sp P6809 | mIFA<br>Glik        | 56% | 31.4 | 51.09511 | Ref | -0.56 | 0.41 | 0.29 | 0.53 | 0.86 | 0.029 | 0.94 | 9460 | 7280 | 15400 | 15900 | 20700 | 22800 | 13400 | 24900 | 463.3 | 1386.8 | 3 | 0.0233 | 16.79 |
| Cytochrome c<br>OS=Equus caballus<br>GN=CYCS PE=1<br>SV=2 | 4 CYC_H<br>ORSE,sp <br>P00007 C<br>YC_HIPA<br>M,sp P00<br>008 CYC_<br>RABIT,sp <br>P00011 C<br>YC_CANF<br>A,sp P000<br>12 CYC_<br>MIRLE,sp <br>P00013 C<br>YC_MINS<br>C,sp P628<br>94 CYC_B<br>OVIN,sp <br>P62895 C<br>YC_PIG,sp<br> P62896 <br>CYC_SHEE<br>P,sp P628<br>97 CYC_<br>MOUSE,s<br>p P62898<br> CYC_RAT<br>,sp P6809 | tGPN<br>LHGL<br>FGR | 54% | 32   | 52.01706 | Ref | -0.26 | 0.39 | 0.34 | 0.28 | 0.7  | 0.26  | 0.8  | 6770 | 4930 | 8390  | 9100  | 9590  | 11200 | 8630  | 12400 | 491.6 | 1471.8 | 3 | 0.0049 | 3.342 |



|                                                                                            |                                                                                                                                                                                                                                       |                    |     |      |          |     |       |      |       |      |      |       |      |     |     |      |      |     |      |     |      |       |        |   |        |       |
|--------------------------------------------------------------------------------------------|---------------------------------------------------------------------------------------------------------------------------------------------------------------------------------------------------------------------------------------|--------------------|-----|------|----------|-----|-------|------|-------|------|------|-------|------|-----|-----|------|------|-----|------|-----|------|-------|--------|---|--------|-------|
| Eukaryotic translation initiation factor 3 subunit F OS=Pan troglodytes GN=EIF3F PE=2 SV=1 | 3 EIF3F_P ANTR,sp  O00303 E IF3F_HUMAN,sp  Q4R5B8 E IF3F_MACFA,sp  Q9DCH4 EIF3F_MOUSE, tr  B3KSH1 B3KSH1_HUMAN, tr  B4DMT5 B4DMT5_HUMAN, tr  D2H3J4 D2H3J4_AILME, tr  D4AC36 D4AC36_RAT, tr  E1BLZ8 E1BLZ8_BOVIN, tr  E9PQV8 E9PQV8   | IHPV ILASI VDSY ER | 72% | 37.2 | 53.34174 | Ref | 0.14  | 0.24 | -0.22 | 0.11 | 0.23 | 0.25  | 0.13 | 312 | 313 | 363  | 297  | 410 | 391  | 413 | 378  | 672.7 | 2015.1 | 3 | 0.0099 | 4.932 |
| Peroxisomal membrane protein PEX14 OS=Homo sapiens GN=PEX14 PE=1 SV=1                      | 1 PEX14_HUMAN,sp  Q642G4 PEX14_RAT, tr  B7Z4Z4_HUMAN, tr  E1BFW8 E1BFW8_BOVIN, tr  F1RHS6 F1RHS6_PIG, tr  F5H4J2 F5H4J2_HUMAN, tr  F6SDL5 F6SDL5_HORSE, tr  F6SJ43 F6SJ43_CALJA, tr  F6XV44 F6XV44_CALJA, tr  F7BHA3 F7BHA3_CALJA, tr | rPEG ASN ESER D    | 95% | 52.7 | 49.707   | Ref | -0.44 | 0.57 | 0.37  | -0.2 | 0.46 | -0.49 | 0.33 | 921 | 590 | 1290 | 1260 | 936 | 1290 | 698 | 1230 | 550.9 | 1649.8 | 3 | 0.0108 | 6.541 |

|                                                                       |                                                                                                                                                                                                                                     |                          |     |      |          |     |        |      |       |       |      |       |      |      |      |      |      |      |      |      |      |       |        |   |        |       |
|-----------------------------------------------------------------------|-------------------------------------------------------------------------------------------------------------------------------------------------------------------------------------------------------------------------------------|--------------------------|-----|------|----------|-----|--------|------|-------|-------|------|-------|------|------|------|------|------|------|------|------|------|-------|--------|---|--------|-------|
| Peroxisomal membrane protein PEX14 OS=Homo sapiens GN=PEX14 PE=1 SV=1 | 1 PEX14_HUMAN,sp Q642G4 PEX14_RAT, tr B7Z4Z4 B7Z4Z4_HUMAN, tr E1BFW8 E1BFW8_BOVIN, tr F1RHS6 F1RHS6_PIG, tr F5H4J2 F5H4J2_HUMAN, tr F6SDL5 F6SDL5_HORSE, tr F6SJ43 F6SJ43_CALJA, tr F6XV44 F6XV44_CALJA, tr F7BHA3 F7BHA3_CALJA, tr | rPEG<br>ASN<br>ESER<br>D | 89% | 41   | 49.70849 | Ref | -0.024 | 0.27 | 0.062 | -0.15 | 0.44 | -0.21 | 0.31 | 669  | 501  | 666  | 647  | 615  | 809  | 537  | 768  | 550.9 | 1649.8 | 3 | 0.01   | 6.087 |
| Peroxisomal membrane protein PEX14 OS=Homo sapiens GN=PEX14 PE=1 SV=1 | 1 PEX14_HUMAN,sp Q642G4 PEX14_RAT, tr B7Z4Z4 B7Z4Z4_HUMAN, tr E1BFW8 E1BFW8_BOVIN, tr F1RHS6 F1RHS6_PIG, tr F5H4J2 F5H4J2_HUMAN, tr F6SDL5 F6SDL5_HORSE, tr F6SJ43 F6SJ43_CALJA, tr F6XV44 F6XV44_CALJA, tr F7BHA3 F7BHA3_CALJA, tr | rPEG<br>ASnE<br>SERD     | 93% | 44.7 | 48.95644 | Ref | -0.12  | 0.44 | 0.22  | -0.12 | 0.38 | -0.43 | 0.45 | 1340 | 1110 | 1770 | 1710 | 1500 | 1840 | 1100 | 2000 | 551.3 | 1650.8 | 3 | 0.0069 | 4.199 |



|                                                                    |                                                                                                                                                                                                                                                                                                                                         |                                  |     |      |          |     |      |       |       |      |      |       |      |      |      |      |      |      |      |      |      |       |        |   |        |       |
|--------------------------------------------------------------------|-----------------------------------------------------------------------------------------------------------------------------------------------------------------------------------------------------------------------------------------------------------------------------------------------------------------------------------------|----------------------------------|-----|------|----------|-----|------|-------|-------|------|------|-------|------|------|------|------|------|------|------|------|------|-------|--------|---|--------|-------|
| 60S acidic ribosomal protein P1 OS=Homo sapiens GN=RPLP1 PE=1 SV=1 | 6 RLA1_H<br>UMAN,sp<br> P19944 <br>RLA1_RAT<br>,sp Q56K<br>14 RLA1_<br>BOVIN,tr <br>A9XSS6 A<br>9XSS6_AIL<br>ME,tr D2<br>HF22 D2<br>HF22_AIL<br>ME,tr E1<br>BCL5 E1B<br>CL5_BOVI<br>N,tr E2RP<br>70 E2RP7<br>O_CANFA,<br>tr F1RJ90<br> F1RJ90_<br>PIG,tr F1<br>RN65 F1R<br>N65_PIG,t<br>r F1SIT7 <br>F1SIT7_PI<br>G,tr F6TQ<br>53 F6TQS | aAG<br>VNV<br>EPF<br>WPG<br>LFAK | 95% | 64.4 | 53.80658 | Ref | 0.29 | 0.32  | 0.24  | 0.27 | 0.36 | 0.46  | 0.52 | 4710 | 4080 | 4520 | 4780 | 5400 | 5000 | 5610 | 5810 | 771.1 | 2310.3 | 3 | 0.0138 | 5.968 |
| 60S acidic ribosomal protein P1 OS=Homo sapiens GN=RPLP1 PE=1 SV=1 | 6 RLA1_H<br>UMAN,sp<br> P19944 <br>RLA1_RAT<br>,sp Q56K<br>14 RLA1_<br>BOVIN,tr <br>A9XSS6 A<br>9XSS6_AIL<br>ME,tr D2<br>HF22 D2<br>HF22_AIL<br>ME,tr E1<br>BCL5 E1B<br>CL5_BOVI<br>N,tr E2RP<br>70 E2RP7<br>O_CANFA,<br>tr F1RJ90<br> F1RJ90_<br>PIG,tr F1<br>RN65 F1R<br>N65_PIG,t<br>r F1SIT7 <br>F1SIT7_PI<br>G,tr F6TQ<br>53 F6TQS | aAG<br>VNV<br>EPF<br>WPG<br>LFAK | 95% | 54.6 | 53.95277 | Ref | 1.8  | -0.27 | -0.68 | 0.31 | -0.3 | -0.19 | 0.75 | 1240 | 6820 | 1730 | 1460 | 3190 | 1830 | 2070 | 3930 | 578.6 | 2310.3 | 4 | 0.0236 | 10.19 |

|                                                                                  |                                                                                                                                                                                                                                          |                                  |     |      |          |     |       |       |      |        |      |       |       |       |       |       |       |       |       |       |       |       |        |   |        |       |
|----------------------------------------------------------------------------------|------------------------------------------------------------------------------------------------------------------------------------------------------------------------------------------------------------------------------------------|----------------------------------|-----|------|----------|-----|-------|-------|------|--------|------|-------|-------|-------|-------|-------|-------|-------|-------|-------|-------|-------|--------|---|--------|-------|
| 60S acidic ribosomal protein P1 OS=Homo sapiens GN=RPLP1 PE=1 SV=1               | 6 RLA1_HUMAN,sp P19944 RLA1_RAT,sp Q56K14 RLA1_BOVIN,tr A9XSS6 A9XSS6_AILME,tr D2HF22 D2HF22_AILME,tr E1BCL5 E1BCL5_BOVIN,tr E2RP70 E2RP70_CANFA, tr F1RJ90 F1RJ90_PIG, tr F1RN65 F1RN65_PIG, tr F1SIT7 F1SIT7_PIG, tr F6TQ53 F6TQ53 FAK | aAG<br>VNV<br>EPF<br>WPG<br>LFAK | 95% | 55   | 53.84416 | Ref | -0.67 | 0.4   | 0.26 | 0.31   | 0.54 | 0.67  | 0.8   | 1140  | 622   | 1420  | 1450  | 1650  | 1690  | 1930  | 2090  | 771.1 | 2310.3 | 3 | 0.0152 | 6.591 |
| Protein disulfide-isomerase A3 (Fragments) OS=Papio hamadryas GN=PDIA3 PE=1 SV=1 | sp P81246 PDIA3_PAPHA                                                                                                                                                                                                                    | sDVL<br>ELTD<br>DNF<br>ESR       | 95% | 80.2 | 51.18017 | Ref | -0.17 | -0.2  | 0.12 | -0.08  | 0.33 | -0.56 | 0.22  | 26500 | 20400 | 21600 | 30300 | 29000 | 33600 | 19000 | 32200 | 972.5 | 1942.9 | 2 | 0.0143 | 7.332 |
| Protein disulfide-isomerase A3 (Fragments) OS=Papio hamadryas GN=PDIA3 PE=1 SV=1 | sp P81246 PDIA3_PAPHA                                                                                                                                                                                                                    | sDVL<br>ELTD<br>DNF<br>ESR       | 93% | 46.7 | 51.2009  | Ref | -0.17 | -0.01 | 0.16 | -0.009 | 0.04 | -0.06 | 0.097 | 12800 | 11500 | 14000 | 17600 | 17300 | 15700 | 15300 | 16900 | 648.7 | 1942.9 | 3 | 0.0131 | 6.749 |

|                                                                                           |                                                                       |                                 |     |      |          |     |        |       |       |        |      |       |       |      |      |      |      |      |      |      |      |       |        |   |        |       |
|-------------------------------------------------------------------------------------------|-----------------------------------------------------------------------|---------------------------------|-----|------|----------|-----|--------|-------|-------|--------|------|-------|-------|------|------|------|------|------|------|------|------|-------|--------|---|--------|-------|
| Protein disulfide-isomerase A3 (Fragments)<br>OS=Papio hamadryas<br>GN=PDIA3 PE=1<br>SV=1 | sp P81246 PDIA3_PAPHA                                                 | sDVL<br>ELTD<br>DNF<br>ESR      | 95% | 79.6 | 51.35212 | Ref | -0.044 | -0.11 | 0.13  | -0.085 | 0.24 | -0.54 | 0.14  | 6490 | 5470 | 5670 | 7530 | 7140 | 7790 | 4760 | 7540 | 972.5 | 1942.9 | 2 | 0.0115 | 5.892 |
| Selenoprotein M<br>OS=Sus scrofa<br>GN=Selm PE=2<br>SV=1                                  | tr C4PK53 C4PK53_PIG, tr E1BKK9 E1BKK9_BOVI N, tr F6V9B1 F6V9B1_HORSE | hLPG<br>ADP<br>ELVL<br>LGH<br>R | 95% | 59.4 | 52.91462 | Ref | -0.21  | 0.34  | 0.088 | 0.082  | 0.37 | -0.19 | 0.34  | 3250 | 2490 | 3960 | 3720 | 4090 | 4360 | 3090 | 4420 | 482.8 | 1927.1 | 4 | 0.0051 | 2.668 |
| Selenoprotein M<br>OS=Sus scrofa<br>GN=Selm PE=2<br>SV=1                                  | tr C4PK53 C4PK53_PIG, tr E1BKK9 E1BKK9_BOVI N, tr F6V9B1 F6V9B1_HORSE | hLPG<br>ADP<br>ELVL<br>LGH<br>R | 95% | 55.5 | 53.00589 | Ref | 0.062  | 0.096 | 0.21  | 0.05   | 0.23 | 0.15  | 0.092 | 3360 | 3000 | 3340 | 4060 | 4000 | 3940 | 3910 | 3720 | 643.4 | 1927.1 | 3 | 0.0099 | 5.118 |
| Selenoprotein M<br>OS=Sus scrofa<br>GN=Selm PE=2<br>SV=1                                  | tr C4PK53 C4PK53_PIG, tr E1BKK9 E1BKK9_BOVI N, tr F6V9B1 F6V9B1_HORSE | hLPG<br>ADP<br>ELVL<br>LGH<br>R | 93% | 46.6 | 53.00589 | Ref | -0.2   | 0.006 | 0.28  | 0.078  | 0.62 | -0.24 | 0.19  | 3730 | 2830 | 3530 | 4800 | 4590 | 5840 | 3360 | 4480 | 482.8 | 1927.1 | 4 | 0.0098 | 5.075 |

|                                                                           |                                                                                                                                                                                                                 |         |     |      |          |     |       |       |       |       |       |       |      |       |       |       |       |       |       |       |       |       |        |   |        |       |
|---------------------------------------------------------------------------|-----------------------------------------------------------------------------------------------------------------------------------------------------------------------------------------------------------------|---------|-----|------|----------|-----|-------|-------|-------|-------|-------|-------|------|-------|-------|-------|-------|-------|-------|-------|-------|-------|--------|---|--------|-------|
| U2 small nuclear ribonucleoprotein B" OS=Homo sapiens GN=SNRPB2 PE=1 SV=1 | 9 RU2B_HUMAN,sp P09012 SNRPA_HUMAN,sp Q06AA4 SNRPA_PIG,sp Q2KIR1 SNRPA_BOVIN,sp Q62189 SNRPA_MOUSE,sp Q9CQI7 RU2B_MOUSE,tr A2BGM2 A2BGM2_MOUSE,tr A2CES4 A2CES4_MOUSE,tr A8QKB2 A8QKB2_MUSSP,tr B2LYL4 B2LYL4_S | gQAFVIF | 89% | 41.2 | 50.25961 | Ref | 0.024 | -0.16 | -0.05 | -0.29 | 0.005 | -0.18 | 0.57 | 4440  | 4170  | 3980  | 4840  | 4490  | 4820  | 4420  | 7380  | 506.6 | 1516.9 | 3 | #####  | 0.277 |
| U2 small nuclear ribonucleoprotein B" OS=Homo sapiens GN=SNRPB2 PE=1 SV=1 | 9 RU2B_HUMAN,sp P09012 SNRPA_HUMAN,sp Q06AA4 SNRPA_PIG,sp Q2KIR1 SNRPA_BOVIN,sp Q62189 SNRPA_MOUSE,sp Q9CQI7 RU2B_MOUSE,tr A2BGM2 A2BGM2_MOUSE,tr A2CES4 A2CES4_MOUSE,tr A8QKB2 A8QKB2_MUSSP,tr B2LYL4 B2LYL4_S | gQAFVIF | 89% | 41.9 | 50.90921 | Ref | -0.24 | -0.17 | 0.068 | -0.27 | 0.036 | -0.24 | 0.53 | 21800 | 15000 | 17000 | 22600 | 19700 | 21300 | 18400 | 31000 | 506.6 | 1516.9 | 3 | 0.0128 | 8.419 |

|                                                                           |                                                                                                                                                                                                                                                                                         |                    |     |      |          |     |       |       |       |       |       |       |       |      |      |      |      |      |      |      |      |       |        |   |        |       |
|---------------------------------------------------------------------------|-----------------------------------------------------------------------------------------------------------------------------------------------------------------------------------------------------------------------------------------------------------------------------------------|--------------------|-----|------|----------|-----|-------|-------|-------|-------|-------|-------|-------|------|------|------|------|------|------|------|------|-------|--------|---|--------|-------|
| U2 small nuclear ribonucleoprotein B" OS=Homo sapiens GN=SNRPB2 PE=1 SV=1 | 9 RU2B_HUMAN,sp P09012 SNRPA_HUMAN,sp Q06AA4 SNRPA_PIG,sp Q2KIR1 SNRPA_BOVIN,sp Q62189 SNRPA_MOUSE,sp Q9CQI7 RU2B_MOUSE,transcript A2BGM2 A2BGM2_MOUSE,transcript A2CES4 A2CES4_MOUSE,transcript A8QKB2 A8QKB2_MUSSP,transcript B2LYL4 B2LYL4_S                                         | gQA<br>FVIF        | 67% | 32.6 | 50.18975 | Ref | 0.028 | -0.17 | 0.018 | -0.12 | -0.06 | -0.11 | 0.35  | 1920 | 1700 | 1600 | 2060 | 2060 | 1880 | 1890 | 2580 | 506.6 | 1516.9 | 3 | 0.0015 | 0.988 |
| Serine/arginine-rich splicing factor 9 OS=Homo sapiens GN=SRSF9 PE=1 SV=1 | 2 SRSF9_HUMAN,sp Q5PPI1 SRSF9_RAT,sp Q9D0B0 SRSF9_MOUSE,transcript A4FUC6 A4FUC6_BOVIN,transcript A8K3M9 A8K3M9_HUMAN,transcript B4DFT9 B4DFT9_HUMAN,transcript D2I5D9 D2I5D9_AILME,transcript E2RK20 E2RK20_CANFA,transcript F1MWF4 F1MWF4_BOVIN,transcript F1RJ0 F1RJ0_PIG,transcript | hGLV<br>PFAF<br>VR | 85% | 40   | 51.62743 | Ref | -0.17 | -0.11 | -0.2  | -0.38 | -0.15 | -0.27 | -0.03 | 2070 | 1530 | 1740 | 1830 | 1780 | 1820 | 1740 | 2050 | 483   | 1445.8 | 3 | 0.009  | 6.186 |

|                                                                                    |                                                                                                                                                                                                                                          |                    |     |      |          |     |       |       |       |       |       |       |       |      |      |      |      |      |      |      |      |     |        |   |        |       |
|------------------------------------------------------------------------------------|------------------------------------------------------------------------------------------------------------------------------------------------------------------------------------------------------------------------------------------|--------------------|-----|------|----------|-----|-------|-------|-------|-------|-------|-------|-------|------|------|------|------|------|------|------|------|-----|--------|---|--------|-------|
| Serine/arginine-rich splicing factor 9<br>OS=Homo sapiens<br>GN=SRSF9 PE=1<br>SV=1 | 2 SRSF9_HUMAN,sp Q5PPI1 SRSF9_RAT,sp Q9D0B0 SRSF9_MOUSE,trans A4FUC6_BOVIN,trans A8K3M9 A8K3M9_HUMAN,trans B4DFT9 B4DFT9_HUMAN,trans D2I5D9 D2I5D9_AILME,trans E2RK20 E2RK20_CANFA,trans F1MWF4 F1MWF4_BOVIN,trans F1RJ0 F1RJ0_PIG,trans | hGLV<br>PFAF<br>VR | 73% | 35.5 | 51.62949 | Ref | -0.16 | -0.16 | -0.15 | -0.34 | -0.15 | -0.18 | 0.003 | 2630 | 2190 | 2360 | 2670 | 2590 | 2580 | 2630 | 2970 | 483 | 1445.8 | 3 | 0.009  | 6.248 |
| Serine/arginine-rich splicing factor 9<br>OS=Homo sapiens<br>GN=SRSF9 PE=1<br>SV=1 | 2 SRSF9_HUMAN,sp Q5PPI1 SRSF9_RAT,sp Q9D0B0 SRSF9_MOUSE,trans A4FUC6_BOVIN,trans A8K3M9 A8K3M9_HUMAN,trans B4DFT9 B4DFT9_HUMAN,trans D2I5D9 D2I5D9_AILME,trans E2RK20 E2RK20_CANFA,trans F1MWF4 F1MWF4_BOVIN,trans F1RJ0 F1RJ0_PIG,trans | hGLV<br>PFAF<br>VR | 77% | 36.7 | 51.50812 | Ref | -0.14 | -0.14 | -0.1  | -0.35 | -0.13 | -0.28 | -0.08 | 1260 | 999  | 1080 | 1250 | 1160 | 1180 | 1100 | 1260 | 483 | 1445.8 | 3 | 0.0051 | 3.532 |

|                                                                          |                                                                                                                                                                                                                                                                                                                          |            |     |      |          |     |       |       |       |        |       |       |       |       |      |       |      |       |      |       |      |       |        |   |        |       |
|--------------------------------------------------------------------------|--------------------------------------------------------------------------------------------------------------------------------------------------------------------------------------------------------------------------------------------------------------------------------------------------------------------------|------------|-----|------|----------|-----|-------|-------|-------|--------|-------|-------|-------|-------|------|-------|------|-------|------|-------|------|-------|--------|---|--------|-------|
| Tax_Id=10090<br>Gene_Symbol=Krt2<br>3 Keratin, type I<br>cytoskeletal 23 | PI001214<br>62.1 SWI<br>SS-<br>PROT:Q99<br>PS0,REV_t<br>r B0VXC2<br> B0VXC2_<br>CALJA,RE<br>V_tr F1M<br>QV2 F1M<br>QV2_BOV<br>IN,REV_tr<br> F1Q463 <br>F1Q463_C<br>ANFA,REV<br>_tr F6V3Z<br>0 F6V3Z0<br>_HORSE,R<br>EV_tr F6V<br>MW7 F6<br>VMW7_M<br>ONDO,RE<br>V_tr F6VZ<br>M1 F6VZ<br>M1_HORS<br>E,REV_tr <br>F7E356 F | vLLG<br>ik | 65% | 20.9 | 38.85926 | Ref | -0.28 | -0.03 | -0.34 | -0.23  | -0.25 | -0.08 | -0.52 | 3170  | 2220 | 2870  | 2590 | 3070  | 2640 | 3120  | 2280 | 417.6 | 1249.9 | 3 | 0.002  | 1.598 |
| Tax_Id=10090<br>Gene_Symbol=Krt2<br>3 Keratin, type I<br>cytoskeletal 23 | PI001214<br>62.1 SWI<br>SS-<br>PROT:Q99<br>PS0,REV_t<br>r B0VXC2<br> B0VXC2_<br>CALJA,RE<br>V_tr F1M<br>QV2 F1M<br>QV2_BOV<br>IN,REV_tr<br> F1Q463 <br>F1Q463_C<br>ANFA,REV<br>_tr F6V3Z<br>0 F6V3Z0<br>_HORSE,R<br>EV_tr F6V<br>MW7 F6<br>VMW7_M<br>ONDO,RE<br>V_tr F6VZ<br>M1 F6VZ<br>M1_HORS<br>E,REV_tr <br>F7E356 F | vLLG<br>ik | 64% | 21.8 | 40.24937 | Ref | -0.44 | 0.06  | -0.42 | -0.043 | -0.33 | -0.02 | -0.55 | 11400 | 7260 | 11200 | 8970 | 12900 | 9220 | 11900 | 8180 | 625.9 | 1249.8 | 2 | 0.0241 | 19.3  |

|                                                                                                                                                                                                                                                                                                                          |                              |                          |      |          |          |       |       |       |       |       |       |       |       |      |      |      |      |      |      |      |       |        |        |        |        |       |
|--------------------------------------------------------------------------------------------------------------------------------------------------------------------------------------------------------------------------------------------------------------------------------------------------------------------------|------------------------------|--------------------------|------|----------|----------|-------|-------|-------|-------|-------|-------|-------|-------|------|------|------|------|------|------|------|-------|--------|--------|--------|--------|-------|
| PI001214<br>62.1 SWI<br>SS-<br>PROT:Q99<br>PS0,REV_t<br>r B0VXC2<br> B0VXC2_<br>CALJA,RE<br>V_tr F1M<br>QV2 F1M<br>QV2_BOV<br>IN,REV_tr<br> F1Q463 <br>F1Q463_C<br>ANFA,REV<br>_tr F6V3Z<br>0 F6V3Z0<br>_HORSE,R<br>EV_tr F6V<br>MW7 F6<br>VMW7_M<br>ONDO,RE<br>V_tr F6VZ<br>M1 F6VZ<br>M1_HORS<br>E,REV_tr <br>F7E356 F | VLLG<br>lk                   | 78%                      | 25.8 | 40.24937 | Ref      | -0.36 | 0.22  | -0.75 | 0.14  | -0.37 | -0.07 | -0.76 | 3720  | 2530 | 4110 | 2360 | 4800 | 2940 | 3780 | 2320 | 417.6 | 1249.8 | 3      | 0.0219 | 17.55  |       |
| Vasodilator-<br>stimulated<br>phosphoprotein<br>OS=Bos taurus<br>GN=VASP PE=2<br>SV=3                                                                                                                                                                                                                                    | sp Q2TA4<br>9 VASP_B<br>OVIN | dESA<br>NQE<br>ESDA<br>R | 95%  | 48       | 46.63041 | Ref   | -0.83 | -0.06 | -0.91 | -0.23 | -0.49 | -0.6  | -0.78 | 3180 | 1440 | 2680 | 1660 | 2930 | 2140 | 2070 | 1810  | 827.9  | 1653.7 | 2      | 0.0078 | 4.706 |
| Vasodilator-<br>stimulated<br>phosphoprotein<br>OS=Bos taurus<br>GN=VASP PE=2<br>SV=3                                                                                                                                                                                                                                    | sp Q2TA4<br>9 VASP_B<br>OVIN | qEEA<br>SAG<br>PVA<br>Pk | 95%  | 67.7     | 53.4505  | Ref   | -0.32 | -0.88 | -0.36 | -0.42 | -0.02 | -1.1  | -0.57 | 7350 | 5520 | 4060 | 6530 | 6910 | 7960 | 4050 | 5650  | 896.5  | 1791   | 2      | 0.0147 | 8.227 |



|                                                                                |                                                                                                                                                                                                                               |                                          |     |      |          |     |        |      |       |      |      |      |      |      |      |      |      |      |      |      |      |       |        |   |        |       |
|--------------------------------------------------------------------------------|-------------------------------------------------------------------------------------------------------------------------------------------------------------------------------------------------------------------------------|------------------------------------------|-----|------|----------|-----|--------|------|-------|------|------|------|------|------|------|------|------|------|------|------|------|-------|--------|---|--------|-------|
| Apolipoprotein E<br>OS=Bos taurus<br>GN=APOE PE=2<br>SV=1                      | sp Q03247 APOE_BOVIN, tr A7YWR0 A7YWR0_BOVIN, tr Q0ZCB4 Q0ZCB4_BOVIN                                                                                                                                                          | aYkE<br>ELEG<br>QLG<br>PMA<br>QET<br>QAR | 95% | 54.3 | 55.46203 | Ref | -0.064 | 0.23 | 0.14  | 0.33 | 0.31 | 0.38 | 0.43 | 1570 | 1330 | 1760 | 1860 | 2350 | 2010 | 2210 | 2260 | 953.2 | 2856.5 | 3 | 0.0212 | 7.424 |
| Apolipoprotein E<br>OS=Bos taurus<br>GN=APOE PE=2<br>SV=1                      | sp Q03247 APOE_BOVIN, tr A7YWR0 A7YWR0_BOVIN, tr Q0ZCB4 Q0ZCB4_BOVIN                                                                                                                                                          | sEVQ<br>AML<br>GQS<br>TEEL<br>R          | 95% | 59.2 | 53.29036 | Ref | -0.34  | 0.43 | 0.045 | 0.33 | 0.2  | 0.5  | 0.43 | 1490 | 1010 | 1860 | 1600 | 2140 | 1710 | 2210 | 2080 | 991.5 | 1981   | 2 | 0.0012 | 0.624 |
| S-phase kinase-associated protein 1<br>OS=Homo sapiens<br>GN=SKP1 PE=1<br>SV=2 | 8 SKP1_HUMAN, sp P63209 SKP1_CAVPO, sp Q3ZCF3 SKP1_BOVIN, sp Q4R5B9 SKP1_MACFA, sp Q5R512 SKP1_PO NAB, sp Q6PEC4 SKP1_RAT, sp Q9WTX5 SKP1_MOUSE, tr B8QGA5 B8QGA5_SHEEP, tr E5RJR5 E5RJR5_HUMAN, tr F6S4R4 F6S4R4_HORSE, tr F | IQSS<br>DGEI<br>FEVD<br>VEIA<br>k        | 94% | 51.8 | 54.85185 | Ref | 0.36   | 0.28 | -0.11 | 0.49 | 0.21 | 0.47 | 0.47 | 170  | 176  | 181  | 155  | 258  | 186  | 066  | 232  | 829.8 | 2486.3 | 3 | 0.0183 | 7.357 |

|                                                                                              |                                                                                                                                                                                                                                                                                                                                                                                                |                                                |            |             |                 |            |              |              |              |               |              |              |              |              |              |              |              |              |              |              |              |              |               |          |               |              |
|----------------------------------------------------------------------------------------------|------------------------------------------------------------------------------------------------------------------------------------------------------------------------------------------------------------------------------------------------------------------------------------------------------------------------------------------------------------------------------------------------|------------------------------------------------|------------|-------------|-----------------|------------|--------------|--------------|--------------|---------------|--------------|--------------|--------------|--------------|--------------|--------------|--------------|--------------|--------------|--------------|--------------|--------------|---------------|----------|---------------|--------------|
| <p>S-phase kinase-associated protein 1<br/> OS=Homo sapiens<br/> GN=SKP1 PE=1<br/> SV=2</p>  | <p>8 SKP1_H<br/> UMAN,sp<br/>  P63209 <br/> SKP1_CAV<br/> PO,sp Q3<br/> ZCF3 SKP<br/> 1_BOVIN,<br/> sp Q4R5B<br/> 9 SKP1_<br/> MACFA,sp<br/>  Q5R512 <br/> SKP1_PO<br/> NAB,sp Q<br/> 6PEC4 SK<br/> P1_RAT,s<br/> p Q9WTX<br/> 5 SKP1_<br/> MOUSE,tr<br/>  B8QGA5<br/>  B8QGA5<br/> _SHEEP,tr<br/>  E5RJR5 <br/> E5RJR5_H<br/> UMAN,tr <br/> F6S4R4 F<br/> 6S4R4_H<br/> ORSE,tr F</p>          | <p>nDFT<br/> EEEE<br/> AQV<br/> R</p>          | <p>95%</p> | <p>46.9</p> | <p>49.47953</p> | <p>Ref</p> | <p>-0.1</p>  | <p>-0.05</p> | <p>0.19</p>  | <p>0.17</p>   | <p>0.45</p>  | <p>-0.22</p> | <p>0.47</p>  | <p>11400</p> | <p>10000</p> | <p>11300</p> | <p>15000</p> | <p>16200</p> | <p>17200</p> | <p>11300</p> | <p>18100</p> | <p>885.9</p> | <p>1769.8</p> | <p>2</p> | <p>0.0123</p> | <p>6.949</p> |
| <p>Cysteine and glycine rich protein 2<br/> OS=Mus musculus<br/> GN=Csrp2 PE=1<br/> SV=3</p> | <p>4 CSR2_<br/> MOUSE,s<br/> p Q16527<br/>  CSR2_H<br/> UMAN,sp<br/>  Q32LE9 <br/> CSR2_B<br/> OVIN,sp <br/> Q62908 C<br/> SRP2_RAT<br/> ,tr D2HF3<br/> 3 D2HF33<br/> _AILME,tr<br/>  F1RYJ8 F<br/> 1RYJ8_PI<br/> G,tr F6TZ<br/> P6 F6TZP<br/> 6_HORSE,<br/> tr F6WW<br/> F1 F6WW<br/> F1_ORNA<br/> N,tr F6XV<br/> E3 F6XVE<br/> 3_MOND<br/> O,tr F7DZ<br/> IO F7DZIO<br/> _MACMU,<br/> AQ</p> | <p>gFGY<br/> GQG<br/> AGA<br/> LVH<br/> AQ</p> | <p>95%</p> | <p>98.3</p> | <p>52.55499</p> | <p>Ref</p> | <p>-0.45</p> | <p>0.55</p>  | <p>-0.95</p> | <p>-0.046</p> | <p>-0.66</p> | <p>0.3</p>   | <p>-0.79</p> | <p>7270</p>  | <p>4620</p>  | <p>10000</p> | <p>3980</p>  | <p>8200</p>  | <p>4680</p>  | <p>9510</p>  | <p>4420</p>  | <p>868.9</p> | <p>1735.9</p> | <p>2</p> | <p>0.0111</p> | <p>6.38</p>  |

|                                                                                           |                                                                                                                                                                                                                                                                           |            |             |                 |            |              |              |              |              |              |              |              |              |              |              |              |              |              |              |              |              |               |          |               |              |
|-------------------------------------------------------------------------------------------|---------------------------------------------------------------------------------------------------------------------------------------------------------------------------------------------------------------------------------------------------------------------------|------------|-------------|-----------------|------------|--------------|--------------|--------------|--------------|--------------|--------------|--------------|--------------|--------------|--------------|--------------|--------------|--------------|--------------|--------------|--------------|---------------|----------|---------------|--------------|
| <p>Cysteine and glycine rich protein 2<br/>OS=Mus musculus<br/>GN=Csrp2 PE=1<br/>SV=3</p> | <p>4 CSRP2_ MOUSE,s p Q16527  CSRP2_H UMAN,sp  Q32LE9  CSRP2_B OVIN,sp  Q62908 C SRP2_RAT ,tr D2HF3 3 D2HF33 _ALIME,tr  F1RYJ8 F 1RYJ8_ PI G,tr F6TZ P6 F6TZP 6_HORSE, tr F6WW F1 F6WW F1_ORNA N,tr F6XV E3 F6XVE 3_MOND tVYH O,tr F7DZ AEEV IO F7DZIO QcD _MACMU, GR</p> | <p>91%</p> | <p>41.9</p> | <p>48.57254</p> | <p>Ref</p> | <p>-0.16</p> | <p>0.11</p>  | <p>-0.56</p> | <p>-0.15</p> | <p>-0.16</p> | <p>-0.04</p> | <p>-0.49</p> | <p>12600</p> | <p>9860</p>  | <p>12800</p> | <p>9090</p>  | <p>13300</p> | <p>11500</p> | <p>13100</p> | <p>9500</p>  | <p>619.6</p> | <p>1855.8</p> | <p>3</p> | <p>0.0148</p> | <p>7.979</p> |
| <p>Actin-related protein 2 OS=Bos taurus GN=ACTR2 PE=1 SV=1</p>                           | <p>62 ARP2_ BOVIN,sp  P61160  ARP2_HU MAN,sp P 61161 AR P2_MOUS E,sp Q5M 7U6 ARP 2_RAT,sp  Q5R4K0  ARP2_PO NAB,tr B5 APU3 B5 APU3_PIG ,tr D3ZEA 6 D3ZEA6 _RAT,tr E 2QXY7 E2 QXY7_CA NFA,tr F6 ZPQ4 F6Z PQ4_MO NDO,tr F dLM 7BAD3 F7 VGD BAD3_MA EASE CMU,tr F LR</p>      | <p>94%</p> | <p>46</p>   | <p>51.74905</p> | <p>Ref</p> | <p>-0.23</p> | <p>-0.09</p> | <p>-0.07</p> | <p>-0.26</p> | <p>0.081</p> | <p>-0.5</p>  | <p>-0.37</p> | <p>23700</p> | <p>17300</p> | <p>20600</p> | <p>23500</p> | <p>22700</p> | <p>25100</p> | <p>17500</p> | <p>18900</p> | <p>819.9</p> | <p>1637.8</p> | <p>2</p> | <p>0.003</p>  | <p>1.853</p> |

|                                                                                |                                                                                                                                                                                                                              |                            |     |      |          |     |       |       |       |       |      |       |       |       |      |      |       |       |       |      |       |       |        |   |        |       |
|--------------------------------------------------------------------------------|------------------------------------------------------------------------------------------------------------------------------------------------------------------------------------------------------------------------------|----------------------------|-----|------|----------|-----|-------|-------|-------|-------|------|-------|-------|-------|------|------|-------|-------|-------|------|-------|-------|--------|---|--------|-------|
| Actin-related protein 2 OS=Bos taurus GN=ACTR2 PE=1 SV=1                       | 62 ARP2_BOVIN,sp P61160 ARP2_HUMAN,sp P61161 ARP2_MOUSE,sp Q5M7U6 ARP2_RAT,sp Q5R4K0 ARP2_PONAB,tr B5APU3 B5APU3_PIG,tr D3ZEA6 D3ZEA6_RAT,tr E2QXY7 E2QXY7_CANFA,tr F6ZPQ4 F6ZPQ4_MOUSE,tr F7BAD3 F7BAD3_MAMCU,tr F          | kVVV<br>cDn<br>GTG<br>FVk  | 92% | 48   | 54.09113 | Ref | -0.16 | -0.21 | -0.25 | -0.11 | -0.1 | -0.34 | -0.15 | 11000 | 8770 | 9200 | 10000 | 12200 | 10700 | 9470 | 10700 | 775.8 | 2324.3 | 3 | 0.0197 | 8.493 |
| Eukaryotic translation initiation factor 1b OS=Homo sapiens GN=EIF1B PE=1 SV=2 | 9 EIF1B_HUMAN,sp P41567 EIF1_HUMAN,sp P48024 EIF1_MOUSE,sp P61220 EIF1B_PIG,sp Q4R4X9 EIF1B_MACFA,sp Q5E938 EIF1_BOVIN,sp Q5RFF4 EIF1_PONAB,sp Q9CXU9 EIF1B_MOUSE,tr B0K008 B0K008_RAT,tr B2KI38 B2KI38_RHIFE,tr B5DFN1 B5DF | tLTT<br>VQGI<br>ADD<br>YDK | 95% | 54.2 | 54.24635 | Ref | 0.25  | 0.17  | 0.25  | 0.3   | 0.14 | 0.27  | 0.32  | 3770  | 3620 | 3720 | 4420  | 5050  | 3950  | 4510 | 4640  | 716.7 | 2147.1 | 3 | 0.0228 | 10.6  |

|                                                                                       |                                                                                                                                                                                                                                      |                           |            |             |                 |            |              |              |             |              |             |              |             |             |             |             |             |             |             |             |              |              |               |          |               |              |
|---------------------------------------------------------------------------------------|--------------------------------------------------------------------------------------------------------------------------------------------------------------------------------------------------------------------------------------|---------------------------|------------|-------------|-----------------|------------|--------------|--------------|-------------|--------------|-------------|--------------|-------------|-------------|-------------|-------------|-------------|-------------|-------------|-------------|--------------|--------------|---------------|----------|---------------|--------------|
| <p>Eukaryotic translation initiation factor 1b OS=Homo sapiens GN=EIF1B PE=1 SV=2</p> | <p>9 EIF1B_HUMAN,sp P41567 EIF1_HUMAN,sp P48024 EIF1_MOUSE,sp P61220 EIF1B_PIG,sp Q4R4X9 EIF1B_MACFA,sp Q5E938 EIF1_BOVIN,sp Q5RFF4 EIF1_PONAB,sp Q9CXU9 EIF1B_MOUSE,tr B0K008 B0K008_RAT,tr B2KI38 B2KI38_RHIFN1 B5DF</p>           | <p>tLTT VQGI ADD YDkk</p> | <p>90%</p> | <p>45.8</p> | <p>53.58998</p> | <p>Ref</p> | <p>-0.28</p> | <p>0.11</p>  | <p>0.32</p> | <p>0.4</p>   | <p>0.49</p> | <p>0.34</p>  | <p>0.37</p> | <p>3560</p> | <p>2770</p> | <p>3910</p> | <p>5080</p> | <p>5940</p> | <p>5520</p> | <p>5180</p> | <p>5260</p>  | <p>860.8</p> | <p>2579.4</p> | <p>3</p> | <p>0.0085</p> | <p>3.284</p> |
| <p>Cold-inducible RNA-binding protein OS=Mus musculus GN=Cirbp PE=1 SV=1</p>          | <p>4 CIRBP_MOUSE,sp P60825 CIRBP_RAT,sp P60826 CIRBP_P_CRIGR,sp Q14011 CIRBP_HUMAN,sp Q5RF83 CIRBP_PONAB,tr A5XDT6 A5XDT6_CRI GR,tr E1BJQ6 E1BJQ6_BOVIN,tr E2R6G2 E2R6G2_CANFA,tr F1S6R1 F1S6R1_PIG,tr F5BHI1 F5BHI1_PIG,tr F7AB</p> | <p>dSYD SYAT HNE</p>      | <p>87%</p> | <p>32.3</p> | <p>43.91323</p> | <p>Ref</p> | <p>0.054</p> | <p>-0.09</p> | <p>0.18</p> | <p>0.006</p> | <p>0.4</p>  | <p>0.087</p> | <p>0.39</p> | <p>7440</p> | <p>6640</p> | <p>6550</p> | <p>8830</p> | <p>8630</p> | <p>9910</p> | <p>8320</p> | <p>10200</p> | <p>803.3</p> | <p>1604.7</p> | <p>2</p> | <p>0.0129</p> | <p>8.047</p> |

|                                                                                             |                                                                                                                                                                                                                                                                                                                                                                                         |                                      |            |             |                 |            |             |              |              |             |              |              |             |             |             |             |             |             |             |             |             |              |               |          |               |              |
|---------------------------------------------------------------------------------------------|-----------------------------------------------------------------------------------------------------------------------------------------------------------------------------------------------------------------------------------------------------------------------------------------------------------------------------------------------------------------------------------------|--------------------------------------|------------|-------------|-----------------|------------|-------------|--------------|--------------|-------------|--------------|--------------|-------------|-------------|-------------|-------------|-------------|-------------|-------------|-------------|-------------|--------------|---------------|----------|---------------|--------------|
| <p>Cold-inducible RNA-binding protein<br/> OS=Mus musculus<br/> GN=Cirbp PE=1<br/> SV=1</p> | <p>4 CIRBP_ MOUSE,s<br/> p P60825<br/>  CIRBP_R<br/> AT,sp P60<br/> 826 CIRB<br/> P_CRIGR,s<br/> p Q14011<br/>  CIRBP_H<br/> UMAN,sp<br/>  Q5RF83 <br/> CIRBP_PO<br/> NAB,tr A<br/> 5XDT6 A5<br/> XDT6_CRI<br/> GR,tr E1B<br/> JQ6 E1BJ<br/> Q6_BOVI<br/> N,tr E2R6<br/> G2 E2R6<br/> G2_CANF<br/> A,tr F1S6<br/> R1 F1S6R<br/> 1_PIG,tr <br/> F5BH1 F<br/> 5BH1_PI<br/> G,tr F7AB</p>  | <p>yGQI<br/> SEVV<br/> Vvk</p>       | <p>95%</p> | <p>51.4</p> | <p>51.52866</p> | <p>Ref</p> | <p>0.51</p> | <p>0.33</p>  | <p>-0.03</p> | <p>0.13</p> | <p>-0.02</p> | <p>-0.08</p> | <p>0.2</p>  | <p>4240</p> | <p>5310</p> | <p>5080</p> | <p>4440</p> | <p>5480</p> | <p>4320</p> | <p>4310</p> | <p>5220</p> | <p>610.4</p> | <p>1828.1</p> | <p>3</p> | <p>0.0196</p> | <p>10.7</p>  |
| <p>60S ribosomal protein L21<br/> OS=Capra hircus<br/> GN=RPL21 PE=2<br/> SV=1</p>          | <p> RL21_CA<br/> PHI,sp O0<br/> 9167 RL2<br/> 1_MOUSE<br/> ,sp P2028<br/> 0 RL21_R<br/> AT,tr D3Y<br/> VN8 D3Y<br/> VN8_MO<br/> USE,tr D3<br/> YWP4 D3<br/> YWP4_M<br/> OUSE,tr <br/> D3Z1Q1 <br/> D3Z1Q1_<br/> MOUSE,tr<br/>  D3Z422 <br/> D3Z422_<br/> MOUSE,tr<br/>  D3Z9G3 <br/> D3Z9G3_<br/> RAT,tr D3<br/> ZEP1 D3Z<br/> EP1_RAT,t<br/> r D3ZF08<br/>  D3ZF08_<br/> RAT,tr D3</p> | <p>hGV<br/> VPLA<br/> TYM<br/> R</p> | <p>94%</p> | <p>49.5</p> | <p>52.85515</p> | <p>Ref</p> | <p>0.77</p> | <p>0.025</p> | <p>0.57</p>  | <p>0.27</p> | <p>0.51</p>  | <p>0.2</p>   | <p>0.71</p> | <p>5050</p> | <p>7380</p> | <p>4760</p> | <p>7790</p> | <p>6960</p> | <p>7180</p> | <p>6060</p> | <p>8550</p> | <p>618</p>   | <p>1851</p>   | <p>3</p> | <p>0.0203</p> | <p>10.96</p> |

|                                                                                        |                                                                                                                                                                                                                                                                                                                                                               |                                       |            |             |                 |            |             |              |              |              |             |              |              |             |             |             |             |             |             |             |             |              |               |          |               |              |
|----------------------------------------------------------------------------------------|---------------------------------------------------------------------------------------------------------------------------------------------------------------------------------------------------------------------------------------------------------------------------------------------------------------------------------------------------------------|---------------------------------------|------------|-------------|-----------------|------------|-------------|--------------|--------------|--------------|-------------|--------------|--------------|-------------|-------------|-------------|-------------|-------------|-------------|-------------|-------------|--------------|---------------|----------|---------------|--------------|
| <p>60S ribosomal protein L21<br/>OS=Capra hircus<br/>GN=RPL21 PE=2<br/>SV=1</p>        | <p> RL21_CA<br/>PHI,sp O0<br/>9167 RL2<br/>1_MOUSE<br/>,sp P2028<br/>0 RL21_R<br/>AT,tr D3Y<br/>VN8 D3Y<br/>VN8_MO<br/>USE,tr D3<br/>YWP4 D3<br/>YWP4_M<br/>OUSE,tr <br/>D3Z1Q1 <br/>D3Z1Q1_<br/>MOUSE,tr<br/> D3Z422 <br/>D3Z422_<br/>MOUSE,tr<br/> D3Z9G3 <br/>D3Z9G3_<br/>RAT,tr D3<br/>ZEP1 D3Z<br/>EP1_RAT,t<br/>r D3ZF08<br/> D3ZF08_<br/>RAT,tr D3</p> | <p>VYNV<br/>TQH<br/>AVGI<br/>IVNK</p> | <p>88%</p> | <p>42.6</p> | <p>51.9953</p>  | <p>Ref</p> | <p>0.36</p> | <p>0.2</p>   | <p>0.24</p>  | <p>0.48</p>  | <p>0.7</p>  | <p>0.26</p>  | <p>0.87</p>  | <p>1980</p> | <p>2250</p> | <p>2190</p> | <p>2520</p> | <p>3280</p> | <p>3340</p> | <p>2570</p> | <p>3890</p> | <p>755.1</p> | <p>2262.3</p> | <p>3</p> | <p>0.0121</p> | <p>5.355</p> |
| <p>Malate dehydrogenase, mitochondrial<br/>OS=Sus scrofa<br/>GN=MDH2 PE=1<br/>SV=2</p> | <p>6 MDHM<br/>_PIG,sp P<br/>04636 M<br/>DHM_RAT<br/>,sp P0824<br/>9 MDHM<br/>_MOUSE,<br/>sp P4092<br/>6 MDHM<br/>_HUMAN,<br/>sp Q32LG<br/>3 MDHM<br/>_BOVIN,s<br/>p Q4R568<br/> MDHM_<br/>MACFA,sp<br/> Q5NVR2<br/> MDHM_<br/>PONAB,tr<br/> B4DE44 <br/>B4DE44_<br/>HUMAN,t<br/>r D4QGC<br/>3 D4QGC<br/>3_BUBBU,<br/>tr E9PDB<br/>2 E9PDB2</p>                | <p>tIIPLI<br/>SQcT<br/>Pk</p>         | <p>83%</p> | <p>39.8</p> | <p>52.38187</p> | <p>Ref</p> | <p>0.59</p> | <p>-0.05</p> | <p>-0.05</p> | <p>-0.17</p> | <p>-0.3</p> | <p>-0.21</p> | <p>-0.54</p> | <p>1230</p> | <p>1760</p> | <p>1230</p> | <p>1370</p> | <p>1390</p> | <p>1110</p> | <p>1230</p> | <p>977</p>  | <p>656.7</p> | <p>1967.1</p> | <p>3</p> | <p>0.0099</p> | <p>5.022</p> |

|                                                                              |                                                                                                                                                                                                                                   |                                    |     |      |          |     |        |       |      |        |       |       |       |      |      |      |      |      |      |      |      |       |        |   |        |       |
|------------------------------------------------------------------------------|-----------------------------------------------------------------------------------------------------------------------------------------------------------------------------------------------------------------------------------|------------------------------------|-----|------|----------|-----|--------|-------|------|--------|-------|-------|-------|------|------|------|------|------|------|------|------|-------|--------|---|--------|-------|
| Malate dehydrogenase, mitochondrial<br>OS=Sus scrofa<br>GN=MDH2 PE=1<br>SV=2 | 6 MDHM_PIG,sp P04636 M<br>DHM_RAT,sp P08249 MDHM_MOUSE,sp P40926 MDHM_HUMAN,sp Q32LG3 MDHM_BOVIN,sp Q4R568 MDHM_MACFA,sp Q5NVR2 MDHM_PONAB,transcript B4DE44 B4DE44_HUMAN,transcript D4QGC3 D4QGC3_BUBBU,transcript E9PDB2 E9PDB2 | vAVL<br>GAS<br>GGI<br>GQP<br>LSLLL | 95% | 69.5 | 46.46208 | Ref | 0.47   | -0.44 | 0.22 | -0.064 | -0.83 | -0.12 | -0.32 | 281  | 313  | 180  | 320  | 290  | 149  | 256  | 221  | 801.2 | 2400.5 | 3 | 0.0166 | 6.931 |
| BAG3 protein<br>OS=Bos taurus<br>GN=BAG3 PE=2<br>SV=1                        | tr A2VE51 A2VE51_BOVIN,transcript F1MIU2 F1MIU2_BOVIN,transcript Q156J1 Q156J1_RA<br>T,transcript Q5U2U8 Q5U2U8_RAT                                                                                                               | eLLA<br>LDSV<br>DPE<br>GR          | 85% | 40   | 52.84618 | Ref | 0.75   | 0.61  | 0.85 | 0.76   | 0.96  | 0.43  | 0.91  | 2320 | 2780 | 2730 | 3620 | 3760 | 3760 | 2720 | 3770 | 859.5 | 1716.9 | 2 | 0.0082 | 4.745 |
| BAG3 protein<br>OS=Bos taurus<br>GN=BAG3 PE=2<br>SV=1                        | tr A2VE51 A2VE51_BOVIN,transcript F1MIU2 F1MIU2_BOVIN,transcript Q156J1 Q156J1_RA<br>T,transcript Q5U2U8 Q5U2U8_RAT                                                                                                               | eTAS<br>SAn<br>GPS<br>R            | 94% | 43.7 | 49.67773 | Ref | -0.091 | 0.77  | 0.92 | 0.82   | 1.4   | 0.025 | 1.2   | 628  | 655  | 1290 | 1610 | 1660 | 2200 | 870  | 1940 | 691.3 | 1380.7 | 2 | 0.0066 | 4.759 |



|                                                                               |                                                                                                                     |                  |     |      |          |     |       |       |       |        |       |       |       |      |      |      |       |       |      |      |      |       |        |   |        |       |
|-------------------------------------------------------------------------------|---------------------------------------------------------------------------------------------------------------------|------------------|-----|------|----------|-----|-------|-------|-------|--------|-------|-------|-------|------|------|------|-------|-------|------|------|------|-------|--------|---|--------|-------|
| Thioredoxin domain-containing protein 17 OS=Mus musculus GN=Txndc17 PE=1 SV=1 | sp Q9CQM5 TXD17_MOUSE, tr CSIWT7 CSIWT7_SHEEP, tr F1MHF7 F1MHF7_BOVIN, tr F1RGM3 F1RGM3_PIG, tr Q95M40 Q95M40_BOVIN | iTAVPTLLk        | 81% | 31.3 | 44.67904 | Ref | 0.32  | -0.08 | 0.22  | 0.13   | -0.01 | -0.35 | -0.11 | 8520 | 9800 | 8070 | 11200 | 11500 | 9160 | 7550 | 8830 | 522   | 1563   | 3 | 0.0048 | 3.041 |
| Thioredoxin domain-containing protein 17 OS=Mus musculus GN=Txndc17 PE=1 SV=1 | sp Q9CQM5 TXD17_MOUSE, tr CSIWT7 CSIWT7_SHEEP, tr F1MHF7 F1MHF7_BOVIN, tr F1RGM3 F1RGM3_PIG, tr Q95M40 Q95M40_BOVIN | tIFAYFSGSk       | 95% | 49.3 | 52.98218 | Ref | 0.16  | -0.24 | 0.15  | -0.094 | 0.15  | -0.08 | -0.03 | 1290 | 1180 | 971  | 1430  | 1330  | 1370 | 1220 | 1260 | 865   | 1728   | 2 | 0.0183 | 10.58 |
| Tryptophanyl-tRNA synthetase, cytoplasmic OS=Bos taurus GN=WARS PE=1 SV=3     | sp P17248 SYWC_BOVIN                                                                                                | eLIEVLQPLIAEHQAR | 80% | 39.4 | 53.12016 | Ref | 0.018 | -0.28 | -0.07 | -0.03  | -0.24 | -0.02 | 0.066 | 256  | 278  | 244  | 318   | 360   | 271  | 330  | 349  | 721.7 | 2162.2 | 3 | 0.0094 | 4.362 |

|                                                                                      |                                               |               |     |      |          |     |      |       |      |       |       |       |       |       |       |       |        |       |       |       |       |       |        |   |        |       |
|--------------------------------------------------------------------------------------|-----------------------------------------------|---------------|-----|------|----------|-----|------|-------|------|-------|-------|-------|-------|-------|-------|-------|--------|-------|-------|-------|-------|-------|--------|---|--------|-------|
| Tryptophanyl-tRNA synthetase, cytoplasmic OS=Bos taurus GN=WARS PE=1 SV=3            | sp P17248 SYWC_BOVIN                          | eVT DEIVk     | 95% | 49.3 | 52.07069 | Ref | -0.1 | -1.1  | 0.22 | -0.16 | 0.44  | -1.1  | -0.05 | 19200 | 13100 | 7250  | 20000  | 17000 | 22500 | 8090  | 16500 | 771   | 1539.9 | 2 | 0.0078 | 5.06  |
| N(G),N(G)-dimethylarginine dimethylaminohydrolase 1 OS=Bos taurus GN=DDAH1 PE=1 SV=3 | sp P56965 DDAH1_BOVIN, tr F1N2V6 F1N2V6_BOVIN | aTHV VVR      | 92% | 44.2 | 50.17818 | Ref | 0.51 | -0.07 | 0.51 | -0.49 | -0.08 | -0.52 | -0.07 | 69400 | 92600 | 67400 | 113000 | 62400 | 72300 | 55800 | 75300 | 362.6 | 1084.7 | 3 | 0.0068 | 6.267 |
| N(G),N(G)-dimethylarginine dimethylaminohydrolase 1 OS=Bos taurus GN=DDAH1 PE=1 SV=3 | sp P56965 DDAH1_BOVIN, tr F1N2V6 F1N2V6_BOVIN | gAEI LADT Fk  | 87% | 42.2 | 52.1573  | Ref | 0.57 | -0.34 | 0.17 | -0.2  | -0.05 | -0.18 | -0.26 | 4600  | 5520  | 3190  | 5100   | 4350  | 4210  | 4040  | 3770  | 558.3 | 1672   | 3 | 0.005  | 2.977 |
| Peroxiredoxin-6 OS=Bos taurus GN=PRDX6 PE=1 SV=3                                     | sp O77834 PRDX6_BOVIN                         | IPFPI IDDK NR | 90% | 43.6 | 51.83022 | Ref | 0.24 | -0.03 | 0.42 | 0.13  | 0.008 | 0.13  | 0.46  | 17300 | 18900 | 17000 | 26000  | 23400 | 18800 | 21400 | 26800 | 646   | 1935.1 | 3 | 0.0139 | 7.181 |
| Peroxiredoxin-6 OS=Bos taurus GN=PRDX6 PE=1 SV=3                                     | sp O77834 PRDX6_BOVIN                         | VIISL QLTA Ek | 89% | 40.3 | 48.84614 | Ref | 0.16 | -0.06 | 0.36 | 0.002 | 0.007 | 0.6   | 0.079 | 606   | 556   | 518   | 779    | 668   | 586   | 924   | 638   | 608.4 | 1822.1 | 3 | 0.0169 | 9.263 |

|                                                               |                                               |                                          |     |      |          |     |       |       |       |       |       |       |       |      |      |      |       |       |      |       |      |       |        |   |        |       |
|---------------------------------------------------------------|-----------------------------------------------|------------------------------------------|-----|------|----------|-----|-------|-------|-------|-------|-------|-------|-------|------|------|------|-------|-------|------|-------|------|-------|--------|---|--------|-------|
| Coactosin-like protein OS=Bos taurus GN=COTL1 PE=2 SV=3       | sp Q2HJ57 COTL1_BOVIN                         | aGG<br>ANY<br>DAQ<br>TE                  | 95% | 73.5 | 47.08285 | Ref | 0.43  | -0.31 | 0.14  | 0.48  | 0.23  | 0.071 | -0.44 | 369  | 444  | 289  | 444   | 618   | 455  | 425   | 295  | 700.8 | 1399.6 | 2 | 0.013  | 9.314 |
| Coactosin-like protein OS=Bos taurus GN=COTL1 PE=2 SV=3       | sp Q2HJ57 COTL1_BOVIN                         | dDSS<br>AVI<br>WVT<br>Fk                 | 76% | 38.5 | 53.75153 | Ref | 0.4   | -0.14 | 0.043 | 0.15  | 0.17  | 0.16  | -0.08 | 578  | 645  | 481  | 612   | 725   | 643  | 666   | 561  | 659.4 | 1975.1 | 3 | 0.0056 | 2.837 |
| Splicing factor 3A subunit 1 OS=Bos taurus GN=SF3A1 PE=2 SV=1 | sp A2VDN6 SF3A1_BOVIN, tr F7DA32 F7DA32_MONDO | tQQ<br>AAQ<br>ANIT<br>LQE<br>QIEA<br>IHK | 95% | 51.1 | 54.61707 | Ref | -0.06 | -0.55 | -0.19 | -0.34 | -0.43 | -0.17 | -0.28 | 8970 | 9440 | 7310 | 10500 | 10400 | 8550 | 10700 | 9850 | 711.6 | 2842.6 | 4 | 0.0238 | 8.367 |
| Splicing factor 3A subunit 1 OS=Bos taurus GN=SF3A1 PE=2 SV=1 | sp A2VDN6 SF3A1_BOVIN, tr F7DA32 F7DA32_MONDO | vMQ<br>QQQ<br>QAS<br>QQQ<br>LPQk         | 73% | 38.9 | 54.95485 | Ref | -0.23 | -0.61 | -0.47 | -0.58 | -0.4  | -0.37 | -0.13 | 4790 | 2930 | 2450 | 3040  | 3100  | 3070 | 3250  | 3820 | 836.1 | 2505.3 | 3 | 0.0231 | 9.2   |

|                                                                 |                                                                                                                                                                                                                                      |                   |     |     |      |          |     |        |      |      |      |      |       |      |       |       |       |       |       |       |       |       |       |        |   |        |       |
|-----------------------------------------------------------------|--------------------------------------------------------------------------------------------------------------------------------------------------------------------------------------------------------------------------------------|-------------------|-----|-----|------|----------|-----|--------|------|------|------|------|-------|------|-------|-------|-------|-------|-------|-------|-------|-------|-------|--------|---|--------|-------|
| Small acidic protein<br>OS=Homo sapiens<br>GN=SMAP PE=1<br>SV=1 | 3 SMAP_ HUMAN,s p Q3MHL 8 SMAP_ BOVIN,sp  Q5RD18  SMAP_P ONAB,sp  Q9R0P4 S MAP_MO USE,tr D2 HRK6 D2 HRK6_AIL ME,tr D3 YVR9 D3Y VR9_MO USE,tr E3 W975 E3 W975_HU MAN,tr E 9PM92 E 9PM92_H UMAN,tr  E9PRZ9 E 9PRZ9_H UMAN,tr  F15994 F | iNEE LESQ YQQ SMD | Sk  | 95% | 52.9 | 53.68848 | Ref | -0.017 | 0.16 | 0.11 | 0.15 | 0.38 | 0.011 | 0.36 | 3180  | 2600  | 3200  | 3450  | 3930  | 4010  | 3250  | 4090  | 846.4 | 2536.2 | 3 | 0.021  | 8.289 |
| Small acidic protein<br>OS=Homo sapiens<br>GN=SMAP PE=1<br>SV=1 | 3 SMAP_ HUMAN,s p Q3MHL 8 SMAP_ BOVIN,sp  Q5RD18  SMAP_P ONAB,sp  Q9R0P4 S MAP_MO USE,tr D2 HRK6 D2 HRK6_AIL ME,tr D3 YVR9 D3Y VR9_MO USE,tr E3 W975 E3 W975_HU MAN,tr E 9PM92 E 9PM92_H UMAN,tr  E9PRZ9 E 9PRZ9_H UMAN,tr  F15994 F | iVIG              | DHk | 73% | 34.6 | 50.64727 | Ref | -0.46  | 0.19 | 0.24 | 0.23 | 0.71 | -0.27 | 0.37 | 45200 | 30100 | 51300 | 59400 | 65300 | 79200 | 42000 | 65100 | 464   | 1388.8 | 3 | 0.0233 | 16.77 |

|                                                                                    |                                                                                                                                                                                                                       |                                 |     |      |          |     |       |       |       |        |      |       |       |       |       |       |       |       |       |       |       |       |        |   |        |       |
|------------------------------------------------------------------------------------|-----------------------------------------------------------------------------------------------------------------------------------------------------------------------------------------------------------------------|---------------------------------|-----|------|----------|-----|-------|-------|-------|--------|------|-------|-------|-------|-------|-------|-------|-------|-------|-------|-------|-------|--------|---|--------|-------|
| Coiled-coil domain-containing protein<br>50 OS=Homo sapiens<br>GN=CCDC50 PE=1 SV=1 | sp Q8IVM0 CCD50_HUMAN, tr D2HKJ3 D2HKJ3_AILME, tr E2RNH5 E2RNH5_CANFA, tr F1MZZ9 F1MZZ9_BOVIN, tr F6SPZ0 F6SPZ0_MACMU, tr F6SQ01 F6SQ01_MACMU, tr F7HK81 F7HK81_CALJA, tr F7HK83 F7HK83_CALJA, tr F7IR51 F7IR51_CALJA | aAQ<br>VAQ<br>DEEI<br>AR        | 92% | 43.9 | 52.17873 | Ref | -0.37 | -0.04 | -0.14 | -0.098 | 0.27 | -0.41 | 0.083 | 17100 | 11400 | 15600 | 16200 | 18500 | 20700 | 13500 | 18900 | 802.9 | 1603.8 | 2 | 0.0129 | 8.047 |
| Coiled-coil domain-containing protein<br>50 OS=Homo sapiens<br>GN=CCDC50 PE=1 SV=1 | sp Q8IVM0 CCD50_HUMAN, tr D2HKJ3 D2HKJ3_AILME, tr E2RNH5 E2RNH5_CANFA, tr F1MZZ9 F1MZZ9_BOVIN, tr F6SPZ0 F6SPZ0_MACMU, tr F6SQ01 F6SQ01_MACMU, tr F7HK81 F7HK81_CALJA, tr F7HK83 F7HK83_CALJA, tr F7IR51 F7IR51_CALJA | kLQE<br>EELL<br>ATQ<br>VDM<br>R | 82% | 41.8 | 54.56347 | Ref | -0.27 | -0.04 | -0.03 | -0.14  | 0.27 | -0.3  | -0.14 | 3430  | 2490  | 3170  | 3590  | 3670  | 4260  | 2990  | 3320  | 804.4 | 2410.3 | 3 | 0.0232 | 9.615 |

|                                                             |                                                                                                                                                                                                                                                                                                                            |                             |     |    |          |     |       |       |       |       |       |       |       |      |      |      |      |      |      |      |      |       |        |   |        |       |
|-------------------------------------------------------------|----------------------------------------------------------------------------------------------------------------------------------------------------------------------------------------------------------------------------------------------------------------------------------------------------------------------------|-----------------------------|-----|----|----------|-----|-------|-------|-------|-------|-------|-------|-------|------|------|------|------|------|------|------|------|-------|--------|---|--------|-------|
| Crk-like protein<br>OS=Homo sapiens<br>GN=CRKL PE=1<br>SV=1 | 9 CRKL_H<br>UMAN,sp<br> P47941 <br>CRKL_MO<br>USE,sp Q<br>5U2U2 C<br>RKL_RAT,t<br>r A2RS58<br> A2RS58_<br>MOUSE,tr<br> D2HUK7<br> D2HUK7<br>_AILME,tr<br> E2RF98 <br>E2RF98_C<br>ANFA,tr F<br>1RKX9 F1<br>RKX9_PIG<br>,tr F6QM<br>U5 F6QM<br>U5_HORS<br>E,tr F6VK<br>11 F6VK1<br>1_MACM<br>U,tr F6Z4<br>K4 F6Z4K<br>4_MOND | gLFP<br>FTHV<br>k           | 72% | 34 | 52.25312 | Ref | -0.13 | -0.52 | 0.021 | -0.11 | 0.27  | -0.68 | 0.57  | 2950 | 2290 | 1900 | 3090 | 3110 | 3530 | 1910 | 4520 | 414.2 | 1653   | 4 | 0.02   | 12.11 |
| Crk-like protein<br>OS=Homo sapiens<br>GN=CRKL PE=1<br>SV=1 | 9 CRKL_H<br>UMAN,sp<br> P47941 <br>CRKL_MO<br>USE,sp Q<br>5U2U2 C<br>RKL_RAT,t<br>r A2RS58<br> A2RS58_<br>MOUSE,tr<br> D2HUK7<br> D2HUK7<br>_AILME,tr<br> E2RF98 <br>E2RF98_C<br>ANFA,tr F<br>1RKX9 F1<br>RKX9_PIG<br>,tr F6QM<br>U5 F6QM<br>U5_HORS<br>E,tr F6VK<br>11 F6VK1<br>1_MACM<br>U,tr F6Z4<br>K4 F6Z4K<br>4_MOND | iHYL<br>DTTT<br>LIEP<br>APR | 95% | 57 | 53.82656 | Ref | 0.24  | 0.009 | 0.049 | -0.13 | -0.06 | -0.11 | -0.15 | 3080 | 3250 | 3000 | 3470 | 3380 | 3090 | 3120 | 3010 | 682   | 2043.1 | 3 | 0.0154 | 7.515 |

|                                                                                 |                                                                   |                           |     |      |          |     |        |       |       |       |       |       |       |       |       |       |       |       |       |       |       |       |        |   |        |       |
|---------------------------------------------------------------------------------|-------------------------------------------------------------------|---------------------------|-----|------|----------|-----|--------|-------|-------|-------|-------|-------|-------|-------|-------|-------|-------|-------|-------|-------|-------|-------|--------|---|--------|-------|
| Uncharacterized protein (Fragment)<br>OS=Bos taurus<br>GN=Bt.40073 PE=4<br>SV=1 | tr F1MNT<br>4 F1MNT<br>4_BOVIN                                    | eTV<br>DSVE<br>k          | 72% | 35.5 | 52.43301 | Ref | 0.077  | -0.53 | -0.31 | -0.33 | -0.03 | -0.67 | -0.29 | 15200 | 15100 | 10700 | 14000 | 15200 | 16400 | 11000 | 14200 | 757.9 | 1513.8 | 2 | 0.0072 | 4.735 |
| Uncharacterized protein (Fragment)<br>OS=Bos taurus<br>GN=Bt.40073 PE=4<br>SV=1 | tr F1MNT<br>4 F1MNT<br>4_BOVIN                                    | tLDN<br>ELDE<br>k         | 95% | 51.5 | 52.94706 | Ref | -0.028 | -0.61 | -0.24 | -0.31 | 0.055 | -1.1  | -0.29 | 10300 | 8180  | 5940  | 8590  | 9000  | 10200 | 4890  | 8300  | 843   | 1683.9 | 2 | 0.0129 | 7.661 |
| Uncharacterized protein (Fragment)<br>OS=Bos taurus<br>GN=Bt.12746 PE=4<br>SV=1 | tr F1MXK<br>2 F1MXK<br>2_BOVIN,<br>tr F1N4E3<br> F1N4E3_<br>BOVIN | hAL<br>QQH<br>QETP<br>k   | 71% | 37   | 53.65406 | Ref | -0.64  | 0.008 | -0.06 | -0.19 | 0.13  | -0.39 | -0.09 | 28900 | 15900 | 27000 | 29000 | 29100 | 31700 | 23100 | 28300 | 642.4 | 1924.1 | 3 | 0.0199 | 10.34 |
| Uncharacterized protein (Fragment)<br>OS=Bos taurus<br>GN=Bt.12746 PE=4<br>SV=1 | tr F1MXK<br>2 F1MXK<br>2_BOVIN,<br>tr F1N4E3<br> F1N4E3_<br>BOVIN | sLGS<br>EEAT<br>NPIS<br>R | 95% | 56.6 | 52.51363 | Ref | -0.41  | -0.13 | -0.14 | -0.35 | 0.11  | -0.64 | 0.3   | 13800 | 9210  | 12100 | 13500 | 12800 | 15500 | 9620  | 18300 | 832.9 | 1663.9 | 2 | 0.0141 | 8.488 |

|                                                                               |                                                                                                                                                                                                                        |                              |     |      |          |     |       |       |       |        |      |       |       |      |      |      |      |      |       |      |      |       |        |   |        |       |
|-------------------------------------------------------------------------------|------------------------------------------------------------------------------------------------------------------------------------------------------------------------------------------------------------------------|------------------------------|-----|------|----------|-----|-------|-------|-------|--------|------|-------|-------|------|------|------|------|------|-------|------|------|-------|--------|---|--------|-------|
| WW domain-binding protein 11<br>OS=Rattus norvegicus<br>GN=Wbp11 PE=2<br>SV=1 | Q2 WBP11_RAT,sp Q923D5 WBP11_MOUSE,sp Q9Y2W2 WBP11_HUMAN, tr B4DM D3 B4DM D3_HUMAN, tr B4DY34 B4DY34_HUMAN, tr D2HZU4 D2HZU4_AI LME, tr E2RER0 E2RERO_CAN FA, tr F5H721 F5H721_HUMAN, tr F6S9X4 F6S9X4_MACM U, tr F6SF | aVSI<br>LPLL<br>GHG<br>VPR   | 95% | 55.8 | 48.98922 | Ref | 0.075 | -0.09 | -0.07 | -0.27  | 0.11 | -0.1  | 0.077 | 3100 | 2760 | 2670 | 3050 | 2930 | 3320  | 2990 | 3360 | 578.4 | 1732.1 | 3 | 0.0076 | 4.398 |
| WW domain-binding protein 11<br>OS=Rattus norvegicus<br>GN=Wbp11 PE=2<br>SV=1 | Q2 WBP11_RAT,sp Q923D5 WBP11_MOUSE,sp Q9Y2W2 WBP11_HUMAN, tr B4DM D3 B4DM D3_HUMAN, tr B4DY34 B4DY34_HUMAN, tr D2HZU4 D2HZU4_AI LME, tr E2RER0 E2RERO_CAN FA, tr F5H721 F5H721_HUMAN, tr F6S9X4 F6S9X4_MACM U, tr F6SF | kATA<br>TISA<br>kPQI<br>TNPk | 70% | 27.7 | 46.36337 | Ref | -0.31 | -0.08 | -0.02 | -0.063 | 0.3  | -0.21 | 0.15  | 8090 | 5830 | 7450 | 8660 | 9290 | 10400 | 7670 | 9720 | 722.2 | 2884.7 | 4 | 0.0345 | 11.97 |



|                                                          |                                                                                                                                                                                                                                                                                                                          |                                  |     |      |          |     |        |       |       |       |      |       |      |      |      |      |      |      |       |      |      |       |        |   |        |       |
|----------------------------------------------------------|--------------------------------------------------------------------------------------------------------------------------------------------------------------------------------------------------------------------------------------------------------------------------------------------------------------------------|----------------------------------|-----|------|----------|-----|--------|-------|-------|-------|------|-------|------|------|------|------|------|------|-------|------|------|-------|--------|---|--------|-------|
| Splicing factor 1<br>OS=Homo sapiens<br>GN=SF1 PE=1 SV=4 | 7 SF01_H<br>UMAN,sp<br> Q64213 <br>SF01_MO<br>USE,tr A2<br>VDM7 A2<br>VDM7_B<br>OVIN,tr B<br>OCM65 B<br>OCM65_P<br>APAN,tr <br>B0KWK3 <br>B0KWK3_<br>CALJA,tr <br>B1MTL4 <br>B1MTL4_<br>CALMO,tr<br> B2KIB5 <br>B2KIB5_R<br>HIFE,tr B<br>3RF39 B3<br>RF39_SOR<br>AR,tr B4D<br>JU4 B4DJ<br>U4_HUM<br>AN,tr B5S<br>NK8 B5S | qGIE<br>TPED<br>QND<br>LR        | 93% | 44.8 | 51.7316  | Ref | 0.036  | -0.16 | -0.21 | -0.33 | 0.33 | -0.51 | 0.16 | 8910 | 7320 | 6930 | 7530 | 7600 | 10500 | 6150 | 9680 | 910   | 1817.9 | 2 | 0.0162 | 8.916 |
| Splicing factor 1<br>OS=Homo sapiens<br>GN=SF1 PE=1 SV=4 | 7 SF01_H<br>UMAN,sp<br> Q64213 <br>SF01_MO<br>USE,tr A2<br>VDM7 A2<br>VDM7_B<br>OVIN,tr B<br>OCM65 B<br>OCM65_P<br>APAN,tr <br>B0KWK3 <br>B0KWK3_<br>CALJA,tr <br>B1MTL4 <br>B1MTL4_<br>CALMO,tr<br> B2KIB5 <br>B2KIB5_R<br>HIFE,tr B<br>3RF39 B3<br>RF39_SOR<br>AR,tr B4D<br>JU4 B4DJ<br>U4_HUM<br>AN,tr B5S<br>NK8 B5S | tVIP<br>GMP<br>TVIP<br>PGLT<br>R | 75% | 35.9 | 51.90228 | Ref | -0.046 | -0.15 | 0.091 | -0.23 | 0.11 | -0.19 | 0.11 | 2600 | 2390 | 2410 | 3210 | 2820 | 3130  | 2660 | 3240 | 977.1 | 1952.1 | 2 | 0.0044 | 2.234 |

|                                                                       |                                                                        |                       |     |      |          |     |        |       |       |       |       |       |       |       |       |       |       |       |       |       |       |       |        |   |        |       |
|-----------------------------------------------------------------------|------------------------------------------------------------------------|-----------------------|-----|------|----------|-----|--------|-------|-------|-------|-------|-------|-------|-------|-------|-------|-------|-------|-------|-------|-------|-------|--------|---|--------|-------|
| Uncharacterized protein OS=Bos taurus GN=Bt.76525 PE=4 SV=1           | tr E1BHQ9 E1BHQ9_BOVIN                                                 | eVTVPVFYPAER          | 79% | 38   | 53.01117 | Ref | -0.055 | -0.91 | -0.32 | -0.22 | 0.09  | -1    | -0.28 | 7700  | 6080  | 3650  | 6160  | 7300  | 7880  | 3800  | 6310  | 856   | 1709.9 | 2 | 0.0122 | 7.123 |
| Uncharacterized protein OS=Bos taurus GN=Bt.76525 PE=4 SV=1           | tr E1BHQ9 E1BHQ9_BOVIN                                                 | sVLQAQVSk             | 92% | 44.7 | 50.32369 | Ref | 0.022  | -0.65 | -0.25 | -0.24 | -0.04 | -0.76 | -0.43 | 22000 | 20700 | 14100 | 20900 | 23200 | 23300 | 14800 | 18400 | 523.3 | 1566.9 | 3 | 0.0062 | 3.925 |
| Uncharacterized protein OS=Bos taurus GN=Bt.102053 PE=3 SV=1          | tr F1MXV8 F1MXV8_BOVIN, tr Q3SZQ8 Q3SZQ8_BOVIN, tr Q5J801 Q5J801_BOVIN | kIFTS DAD FSGI TDD HK | 91% | 45.9 | 55.36209 | Ref | 1      | 0.27  | 0.87  | 0.69  | 0.33  | 0.93  | 0.64  | 11800 | 20400 | 13000 | 22100 | 21500 | 14600 | 23100 | 18700 | 703.1 | 2808.5 | 4 | 0.0267 | 9.512 |
| Uncharacterized protein OS=Bos taurus GN=Bt.102053 PE=3 SV=1          | tr F1MXV8 F1MXV8_BOVIN, tr Q3SZQ8 Q3SZQ8_BOVIN, tr Q5J801 Q5J801_BOVIN | IAVS HVIH k           | 82% | 34.2 | 48.27583 | Ref | 1.1    | 0.19  | 0.94  | 0.55  | 0.38  | 0.98  | 0.59  | 2600  | 5100  | 2900  | 5480  | 4590  | 3570  | 5640  | 4270  | 806.5 | 1611   | 2 | 0.0102 | 6.34  |
| Macrophage migration inhibitory factor OS=Bos taurus GN=MIF PE=1 SV=6 | sp P80177 MIF_BOVIN,sp Q1ZZU7 MIF_SHEEP                                | ILcGL LTER            | 95% | 52.8 | 51.82589 | Ref | -0.081 | 0.31  | 0.4   | -0.15 | -0.23 | 0.31  | 0.075 | 919   | 868   | 1240  | 1470  | 1110  | 914   | 1390  | 1180  | 456.6 | 1366.8 | 3 | 0.0087 | 6.342 |

|                                                                       |                                         |                   |     |      |          |     |       |       |       |       |       |       |       |       |       |       |       |       |       |       |       |       |        |   |        |       |
|-----------------------------------------------------------------------|-----------------------------------------|-------------------|-----|------|----------|-----|-------|-------|-------|-------|-------|-------|-------|-------|-------|-------|-------|-------|-------|-------|-------|-------|--------|---|--------|-------|
| Macrophage migration inhibitory factor OS=Bos taurus GN=MIF PE=1 SV=6 | sp P80177 MIF_BOVIN,sp Q1ZZU7 MIF_SHEEP | pMFVNV TNV PR     | 66% | 34.5 | 52.68309 | Ref | 0.034 | 0.025 | 0.2   | -0.1  | -0.14 | 0.39  | -0.08 | 15500 | 12200 | 13100 | 16600 | 14900 | 12700 | 19100 | 13700 | 789.4 | 1576.9 | 2 | 0.013  | 8.265 |
| MARCKS-related protein OS=Bos taurus GN=MARCKSL1 PE=2 SV=1            | sp Q0VBZ9 MRP_BOVIN                     | aAAT PESQ EPQ Ak  | 71% | 37.2 | 53.80116 | Ref | -0.45 | 0.43  | 0.006 | 0.025 | 0.13  | -0.2  | 0.18  | 8570  | 5960  | 11900 | 9960  | 11100 | 10400 | 8670  | 11200 | 646   | 1935   | 3 | 0.0166 | 8.593 |
| MARCKS-related protein OS=Bos taurus GN=MARCKSL1 PE=2 SV=1            | sp Q0VBZ9 MRP_BOVIN                     | gAEA SAA Ak       | 94% | 45.9 | 51.96306 | Ref | -0.75 | -0.01 | 0.035 | 0.096 | 0.28  | -0.28 | 0.4   | 9600  | 4560  | 8280  | 9590  | 11000 | 10900 | 7730  | 12300 | 692.4 | 1382.8 | 2 | 0.0294 | 21.24 |
| Uncharacterized protein OS=Equus caballus GN=Eca.12978 PE=4 SV=1      | tr F6QD89 F6QD89_HORSE                  | iTVD PTTD GPTk    | 94% | 47.2 | 53.39346 | Ref | -0.37 | 0.25  | -0.02 | -0.03 | -0.26 | -0.1  | 0.3   | 7080  | 4510  | 7500  | 6980  | 7630  | 5680  | 6640  | 8660  | 927   | 1852   | 2 | 0.0226 | 12.17 |
| Uncharacterized protein OS=Equus caballus GN=Eca.12978 PE=4 SV=1      | tr F6QD89 F6QD89_HORSE                  | IkDE GVEL FAV Gik | 71% | 32.2 | 50.63082 | Ref | 0.12  | 0.45  | 0.004 | -0.13 | -0.76 | 0.037 | 0.092 | 2930  | 2940  | 4030  | 3310  | 3320  | 1870  | 3400  | 3510  | 608.4 | 2429.4 | 4 | 0.035  | 14.42 |

|                                                                                                   |                                                                                                                                                                                                                      |                                     |     |      |          |     |        |       |       |       |       |       |       |      |      |      |      |      |      |       |      |       |        |   |        |       |
|---------------------------------------------------------------------------------------------------|----------------------------------------------------------------------------------------------------------------------------------------------------------------------------------------------------------------------|-------------------------------------|-----|------|----------|-----|--------|-------|-------|-------|-------|-------|-------|------|------|------|------|------|------|-------|------|-------|--------|---|--------|-------|
| Acidic leucine-rich nuclear phosphoprotein 32 family member E OS=Mus musculus GN=Anp32e PE=1 SV=2 | 2 AN32E_MOUSE,s p Q5XIE0 AN32E_RAT,sp Q9BTT0 AN32E_HUMAN,tr B4E0D5 B4E0D5_HUMAN,tr D2HBV1 D2HBV1_AILME,tr D3Z9Y8 D3Z9Y8_RAT, tr E2QV22 E2QV22_CANFA,tr E9PLC4 E9PLC4_HUMAN,tr E9PZF5 E9PZF5_MOUSE,tr E9Q5H2 E9Q5H2_M | cPNL<br>TYLN<br>LSGN<br>k           | 78% | 39.5 | 54.07723 | Ref | -0.19  | -0.51 | -0.31 | -0.37 | -0.06 | 0.81  | -0.3  | 5660 | 5030 | 4370 | 5620 | 5950 | 6430 | 12300 | 5650 | 697.7 | 2090.1 | 3 | 0.0154 | 7.383 |
| Acidic leucine-rich nuclear phosphoprotein 32 family member E OS=Mus musculus GN=Anp32e PE=1 SV=2 | 2 AN32E_MOUSE,s p Q5XIE0 AN32E_RAT,sp Q9BTT0 AN32E_HUMAN,tr B4E0D5 B4E0D5_HUMAN,tr D2HBV1 D2HBV1_AILME,tr D3Z9Y8 D3Z9Y8_RAT, tr E2QV22 E2QV22_CANFA,tr E9PLC4 E9PLC4_HUMAN,tr E9PZF5 E9PZF5_MOUSE,tr E9Q5H2 E9Q5H2_M | kLEL<br>SDNI<br>ISGG<br>LEVL<br>AEk | 92% | 42.9 | 51.26196 | Ref | -0.074 | -0.32 | -0.06 | -0.22 | 0.22  | -0.35 | -0.15 | 1100 | 794  | 726  | 973  | 965  | 1140 | 799   | 913  | 735.9 | 2939.7 | 4 | 0.0299 | 10.17 |

|                                                                                                   |                                                                                                                                                                                                                        |             |     |      |          |     |       |       |       |       |       |       |       |       |       |       |       |       |       |       |       |       |        |   |        |       |
|---------------------------------------------------------------------------------------------------|------------------------------------------------------------------------------------------------------------------------------------------------------------------------------------------------------------------------|-------------|-----|------|----------|-----|-------|-------|-------|-------|-------|-------|-------|-------|-------|-------|-------|-------|-------|-------|-------|-------|--------|---|--------|-------|
| Actin-related protein 2/3 complex subunit 5-like protein OS=Rattus norvegicus GN=Arpc5l PE=1 SV=2 | 8 ARP5L_RAT,sp Q5E963 ARP5L_BOVIN,sp Q5R4M1 ARP5L_PONAB,sp Q9BPX5 ARP5L_HUMAN,sp Q9D898 ARP5L_MOUSE, tr A3KQ6 A3KQ6_MOUSE, tr B5APV1 B5APV1_PIG, E2RPG0 E2RPG0_CANFA, tr F1SKQ9 F1SKQ9_PIG, tr F6WNGN=Arpc5l PE=1 SV=2 | aFHAALR     | 60% | 30   | 48.91007 | Ref | -0.39 | 0.071 | 0.32  | -0.21 | 0.27  | -0.62 | 0.32  | 25700 | 18300 | 27300 | 36500 | 27900 | 33900 | 19100 | 36400 | 363.9 | 1088.6 | 3 | 0.009  | 8.24  |
| Actin-related protein 2/3 complex subunit 5-like protein OS=Rattus norvegicus GN=Arpc5l PE=1 SV=2 | 8 ARP5L_RAT,sp Q5E963 ARP5L_BOVIN,sp Q5R4M1 ARP5L_PONAB,sp Q9BPX5 ARP5L_HUMAN,sp Q9D898 ARP5L_MOUSE, tr A3KQ6 A3KQ6_MOUSE, tr B5APV1 B5APV1_PIG, E2RPG0 E2RPG0_CANFA, tr F1SKQ9 F1SKQ9_PIG, tr F6WNGN=Arpc5l PE=1 SV=2 | aLAVGGLGSII | 95% | 67.6 | 49.9393  | Ref | 0.043 | 0.08  | -0.07 | -0.12 | 0.034 | -0.16 | 0.027 | 2060  | 1720  | 1920  | 1940  | 2060  | 2010  | 1840  | 2070  | 477.6 | 1429.9 | 3 | 0.0138 | 9.663 |

|                                                                       |                                                                                                                                                                                                                                                                                                                                    |                    |     |      |          |     |      |       |      |       |      |       |       |       |       |       |       |       |       |       |       |       |        |   |        |       |
|-----------------------------------------------------------------------|------------------------------------------------------------------------------------------------------------------------------------------------------------------------------------------------------------------------------------------------------------------------------------------------------------------------------------|--------------------|-----|------|----------|-----|------|-------|------|-------|------|-------|-------|-------|-------|-------|-------|-------|-------|-------|-------|-------|--------|---|--------|-------|
| 60S ribosomal protein L23<br>OS=Homo sapiens<br>GN=RPL23 PE=1<br>SV=1 | 9 RL23_H<br>UMAN,sp<br> P62830 <br>RL23_MO<br>USE,sp P6<br>2831 RL2<br>3_PIG,sp <br>P62832 R<br>L23_RAT,s<br>p Q3T057<br> RL23_BO<br>VIN,sp Q<br>5REU2 RL<br>23_PONA<br>B,tr A1XE<br>D4 A1XE<br>D4_BOVI<br>N,tr A2A6<br>F9 A2A6F<br>9_MOUSE<br>,tr D2H53<br>7 D2H537<br>_AILME,tr<br> F2X264 <br>F2X264_A<br>ILME,tr F<br>2Z4P3 F2 | gSAI<br>TGP<br>VAk | 90% | 40.2 | 49.78993 | Ref | 0.11 | 0.01  | 0.4  | 0.16  | 0.28 | 0.088 | 0.29  | 5940  | 5390  | 5450  | 8020  | 7470  | 7120  | 6490  | 7410  | 755   | 1507.9 | 2 | 0.0061 | 4.03  |
| 60S ribosomal protein L23<br>OS=Homo sapiens<br>GN=RPL23 PE=1<br>SV=1 | 9 RL23_H<br>UMAN,sp<br> P62830 <br>RL23_MO<br>USE,sp P6<br>2831 RL2<br>3_PIG,sp <br>P62832 R<br>L23_RAT,s<br>p Q3T057<br> RL23_BO<br>VIN,sp Q<br>5REU2 RL<br>23_PONA<br>B,tr A1XE<br>D4 A1XE<br>D4_BOVI<br>N,tr A2A6<br>F9 A2A6F<br>9_MOUSE<br>,tr D2H53<br>7 D2H537<br>_AILME,tr<br> F2X264 <br>F2X264_A<br>ILME,tr F<br>2Z4P3 F2 | VHP<br>AVVI<br>R   | 78% | 32.8 | 47.17862 | Ref | 0.41 | 0.069 | 0.52 | 0.081 | 0.2  | 0.054 | 0.053 | 39200 | 47100 | 40200 | 61800 | 50100 | 47600 | 44900 | 44500 | 398.9 | 1193.7 | 3 | 0.0057 | 4.758 |

|                                                                      |                                                                                                                                              |                     |     |      |          |     |        |       |       |        |       |       |       |       |       |       |       |       |       |       |       |       |        |   |        |       |
|----------------------------------------------------------------------|----------------------------------------------------------------------------------------------------------------------------------------------|---------------------|-----|------|----------|-----|--------|-------|-------|--------|-------|-------|-------|-------|-------|-------|-------|-------|-------|-------|-------|-------|--------|---|--------|-------|
| Uncharacterized protein OS=Bos taurus GN=Bt.41853 PE=4 SV=1          | tr E1BC59 E1BC59_BOVIN                                                                                                                       | sGSY SYSE ER        | 56% | 27.9 | 47.89066 | Ref | -0.091 | -0.05 | -0.11 | -0.15  | 0.2   | -0.44 | 0.067 | 9280  | 8170  | 9100  | 9830  | 10500 | 11700 | 7840  | 11100 | 734.8 | 1467.7 | 2 | 0.0122 | 8.298 |
| Uncharacterized protein OS=Bos taurus GN=Bt.41853 PE=4 SV=1          | tr E1BC59 E1BC59_BOVIN                                                                                                                       | sTQ GVTL TDL QEA Ek | 95% | 55.6 | 54.51785 | Ref | -0.18  | -0.33 | 0.13  | -0.018 | 0.19  | -0.56 | -0.08 | 25800 | 18500 | 18000 | 27800 | 27700 | 27900 | 17400 | 24000 | 743.4 | 2227.2 | 3 | 0.0171 | 7.692 |
| LOC535277 protein OS=Bos taurus GN=LOC535277 PE=2 SV=1               | tr A6QR15 A6QR15_BOVIN, tr D2GUY3 D2GUY3_AILME                                                                                               | mEAl k              | 67% | 33.3 | 51.26128 | Ref | 0.73   | 0.16  | -0.77 | -0.45  | 0.73  | -1.4  | -0.01 | 820   | 1370  | 999   | 589   | 809   | 1610  | 396   | 997   | 469.3 | 936.51 | 2 | 0.0171 | 18.2  |
| LOC535277 protein OS=Bos taurus GN=LOC535277 PE=2 SV=1               | tr A6QR15 A6QR15_BOVIN, tr D2GUY3 D2GUY3_AILME                                                                                               | qVEE ELTH LQk       | 93% | 45.4 | 52.52884 | Ref | 0.014  | -0.41 | -0.01 | 0.029  | 0.48  | -0.77 | 0.14  | 11100 | 8550  | 6940  | 10300 | 11600 | 13900 | 6090  | 11400 | 820.9 | 1639.9 | 2 | 0.0122 | 7.424 |
| Tyrosyl-tRNA synthetase, cytoplasmic OS=Bos taurus GN=YARS PE=2 SV=4 | sp Q29465 SYYC_BOVIN, tr F1MHM5 F1MHM5_BOVIN, tr F6SK64 F6SK64_MONDO, tr F6VBB2 F6VBB2_MONDO, tr F6VBB9 F6VBB9_MONDO, tr Q0III5 Q0III5_BOVIN | hVLF PLk            | 87% | 37.3 | 47.7628  | Ref | 0.28   | -0    | -0.06 | -0.18  | -0.18 | 0.08  | -0.28 | 13800 | 13200 | 11800 | 12700 | 12900 | 11300 | 14100 | 10900 | 488   | 1460.9 | 3 | 0.0246 | 16.83 |

|                                                                      |                                                                                                                                              |                    |     |      |          |     |        |       |       |        |       |       |       |      |      |      |      |      |      |      |      |       |        |   |        |       |
|----------------------------------------------------------------------|----------------------------------------------------------------------------------------------------------------------------------------------|--------------------|-----|------|----------|-----|--------|-------|-------|--------|-------|-------|-------|------|------|------|------|------|------|------|------|-------|--------|---|--------|-------|
| Tyrosyl-tRNA synthetase, cytoplasmic OS=Bos taurus GN=YARS PE=2 SV=4 | sp Q29465 SYYC_BOVIN, tr F1MHM5 F1MHM5_BOVIN, tr F6SK64 F6SK64_MONDO, tr F6VBB2 F6VBB2_MONDO, tr F6VBB9 F6VBB9_MONDO, tr Q0III5 Q0III5_BOVIN | iHLM NPM VPGL TGsk | 82% | 40.6 | 53.36556 | Ref | 0.31   | 0.024 | -0.01 | -0.096 | -0.12 | -0.01 | -0.12 | 1060 | 1270 | 1130 | 1240 | 1290 | 1100 | 1250 | 1150 | 735.1 | 2202.2 | 3 | 0.0083 | 3.761 |
| Uncharacterized protein OS=Bos taurus GN=Bt.2096 PE=4 SV=1           | tr E1BJV0 E1BJV0_BOVIN                                                                                                                       | sISII DSP GILS GEK | 95% | 53.6 | 52.88994 | Ref | -0.062 | -0.21 | -0.06 | -0.2   | -0.06 | -0.29 | 0.14  | 5090 | 4000 | 3930 | 4880 | 4880 | 4690 | 4170 | 5580 | 708.7 | 2123.2 | 3 | 0.0214 | 10.05 |
| Uncharacterized protein OS=Bos taurus GN=Bt.2096 PE=4 SV=1           | tr E1BJV0 E1BJV0_BOVIN                                                                                                                       | vHAY IISFL k       | 52% | 28.7 | 49.1096  | Ref | 0.13   | -0.33 | -0.03 | -0.026 | -0.16 | 0.007 | -0.15 | 843  | 850  | 672  | 932  | 1030 | 816  | 959  | 855  | 600.4 | 1798.1 | 3 | 0.0035 | 1.966 |



|                                                                           |                                                                                                                                                                                                                        |                            |     |      |          |     |       |       |       |       |       |       |       |       |       |       |       |       |       |       |       |       |        |   |        |       |
|---------------------------------------------------------------------------|------------------------------------------------------------------------------------------------------------------------------------------------------------------------------------------------------------------------|----------------------------|-----|------|----------|-----|-------|-------|-------|-------|-------|-------|-------|-------|-------|-------|-------|-------|-------|-------|-------|-------|--------|---|--------|-------|
| U2 small nuclear ribonucleoprotein A' OS=Homo sapiens GN=SNRPA1 PE=1 SV=2 | 1 RU2A_HUMAN,sp P57784 RU2A_MOUSE,sp Q4R8Y8 RU2A_MACFA,tr A6H788 A6H788_BOVIN,tr B2LU27 B2LU27_SHEEP,tr D2I7R5 D2I7R5_AILME,tr D3ZZR5 D3ZZR5_RAT,tr E2QWU2 E2QWU2_CANFA,tr F1RWS8 F1RWS8_PIG,tr F6T1N4 F6T1N4_ORNAN,tr | gLLQSGQI                   | 86% | 39.1 | 51.28997 | Ref | -0.11 | -0.11 | -0.28 | -0.25 | -0.15 | -0.13 | -0.06 | 16800 | 14500 | 15800 | 15800 | 17700 | 16600 | 17500 | 18200 | 715.4 | 1428.8 | 2 | 0.0128 | 8.95  |
| U2 small nuclear ribonucleoprotein A' OS=Homo sapiens GN=SNRPA1 PE=1 SV=2 | 1 RU2A_HUMAN,sp P57784 RU2A_MOUSE,sp Q4R8Y8 RU2A_MACFA,tr A6H788 A6H788_BOVIN,tr B2LU27 B2LU27_SHEEP,tr D2I7R5 D2I7R5_AILME,tr D3ZZR5 D3ZZR5_RAT,tr E2QWU2 E2QWU2_CANFA,tr F1RWS8 F1RWS8_PIG,tr F6T1N4 F6T1N4_ORNAN,tr | nAIA<br>NAS<br>TLAE<br>VER | 82% | 39.5 | 53.33085 | Ref | -0.21 | -0.23 | -0.12 | -0.22 | -0.24 | -0.25 | -0.04 | 7730  | 5440  | 5840  | 7030  | 7250  | 6250  | 6470  | 7430  | 882   | 1761.9 | 2 | 0.0125 | 7.113 |

|                                                          |                                                                                                                                                                                                                                                                                                                         |                           |     |      |          |     |      |       |       |        |       |       |       |      |      |      |       |      |      |      |      |       |        |   |        |       |
|----------------------------------------------------------|-------------------------------------------------------------------------------------------------------------------------------------------------------------------------------------------------------------------------------------------------------------------------------------------------------------------------|---------------------------|-----|------|----------|-----|------|-------|-------|--------|-------|-------|-------|------|------|------|-------|------|------|------|------|-------|--------|---|--------|-------|
| Sorting nexin-1<br>OS=Bos taurus<br>GN=SNX1 PE=2<br>SV=1 | 2 SNX1_B<br>OVIN,sp <br>Q13596 S<br>NX1_HU<br>MAN,sp <br>Q4R503 S<br>NX1_MAC<br>FA,sp Q5<br>RFP8 SNX<br>1_PONAB,<br>sp Q99N2<br>7 SNX1_R<br>AT,sp Q9<br>WV80 SN<br>X1_MOUS<br>E,tr A5YB<br>M3 A5YB<br>M3_HORS<br>E,tr A6NK<br>H4 A6NK<br>H4_HUM<br>AN,tr D2<br>GYR2 D2<br>GYR2_AIL<br>ME,tr D3<br>Z8Y0 D3Z<br>8Y0_RAT,t | KLHA<br>VVET<br>LVN<br>HR | 82% | 34.7 | 49.8205  | Ref | 0.13 | -0.17 | 0.035 | -0.005 | -0    | -0.06 | 0.055 | 1050 | 1110 | 980  | 1270  | 1360 | 1190 | 1190 | 1280 | 531.8 | 2123.3 | 4 | 0.005  | 2.365 |
| Sorting nexin-1<br>OS=Bos taurus<br>GN=SNX1 PE=2<br>SV=1 | 2 SNX1_B<br>OVIN,sp <br>Q13596 S<br>NX1_HU<br>MAN,sp <br>Q4R503 S<br>NX1_MAC<br>FA,sp Q5<br>RFP8 SNX<br>1_PONAB,<br>sp Q99N2<br>7 SNX1_R<br>AT,sp Q9<br>WV80 SN<br>X1_MOUS<br>E,tr A5YB<br>M3 A5YB<br>M3_HORS<br>E,tr A6NK<br>H4 A6NK<br>H4_HUM<br>AN,tr D2<br>GYR2 D2<br>GYR2_AIL<br>ME,tr D3<br>Z8Y0 D3Z<br>8Y0_RAT,t | LAIV<br>R                 | 87% | 26.6 | 38.49665 | Ref | 0.24 | -0.33 | 0.17  | -0.059 | -0.02 | -0.35 | -0.07 | 9520 | 8860 | 6450 | 10300 | 9640 | 8630 | 7200 | 8680 | 494.8 | 987.66 | 2 | 0.0127 | 12.81 |

|                                                                |                                                                                                                                                                                                                                                                                                                     |                          |     |      |          |     |      |      |       |        |      |       |       |       |       |       |       |       |       |       |       |       |        |   |        |       |
|----------------------------------------------------------------|---------------------------------------------------------------------------------------------------------------------------------------------------------------------------------------------------------------------------------------------------------------------------------------------------------------------|--------------------------|-----|------|----------|-----|------|------|-------|--------|------|-------|-------|-------|-------|-------|-------|-------|-------|-------|-------|-------|--------|---|--------|-------|
| Prefoldin subunit 3<br>OS=Homo sapiens<br>GN=VBP1 PE=1<br>SV=3 | 8 PFD3_H<br>UMAN,sp<br> P61759 <br>PFD3_MO<br>USE,sp Q<br>2TBX2 PF<br>D3_BOVI<br>N,sp Q5R<br>CG9 PFD<br>3_PONAB,<br>tr A3KGB<br>1 A3KGB<br>1_MOUSE<br>,tr A3KMJ<br>8 A3KMJ<br>8_MOUSE<br>,tr B0KW<br>U9 B0KW<br>U9_CALJA<br>,tr B4DW<br>R3 B4DW<br>R3_HUM<br>AN,tr B7<br>NZR7 B7<br>NZR7_RA<br>BIT,tr D3<br>DWY7 D3 | dQFT<br>TTEV<br>NMA<br>R | 84% | 38.2 | 51.57112 | Ref | 0.44 | 0.18 | -0.07 | -0.029 | 0.37 | -0.15 | 0.01  | 11000 | 13500 | 12200 | 11500 | 13100 | 15000 | 11000 | 12200 | 858.9 | 1715.8 | 2 | 0.0123 | 7.167 |
| Prefoldin subunit 3<br>OS=Homo sapiens<br>GN=VBP1 PE=1<br>SV=3 | 8 PFD3_H<br>UMAN,sp<br> P61759 <br>PFD3_MO<br>USE,sp Q<br>2TBX2 PF<br>D3_BOVI<br>N,sp Q5R<br>CG9 PFD<br>3_PONAB,<br>tr A3KGB<br>1 A3KGB<br>1_MOUSE<br>,tr A3KMJ<br>8 A3KMJ<br>8_MOUSE<br>,tr B0KW<br>U9 B0KW<br>U9_CALJA<br>,tr B4DW<br>R3 B4DW<br>R3_HUM<br>AN,tr B7<br>NZR7 B7<br>NZR7_RA<br>BIT,tr D3<br>DWY7 D3 | fMEL<br>NLA<br>QK        | 83% | 40.2 | 52.71233 | Ref | 0.43 | 0.1  | 0.1   | -0.01  | 0.11 | 0.01  | -0.03 | 5580  | 6320  | 5450  | 6120  | 6240  | 5930  | 5770  | 5570  | 568   | 1701   | 3 | 0.0099 | 5.845 |

|                                                                             |                                                                                                                                                                                             |                |     |      |          |     |       |       |      |        |       |       |       |       |       |       |       |       |       |       |       |       |        |   |        |       |
|-----------------------------------------------------------------------------|---------------------------------------------------------------------------------------------------------------------------------------------------------------------------------------------|----------------|-----|------|----------|-----|-------|-------|------|--------|-------|-------|-------|-------|-------|-------|-------|-------|-------|-------|-------|-------|--------|---|--------|-------|
| 60S ribosomal protein L14 OS=Sus scrofa GN=RPL14 PE=2 SV=1                  | sp A1XQU3 RL14_PIG,sp Q3T0U2 RL14_BOVIN, tr F1SJQ6 F1SJQ6_PIG                                                                                                                               | aAPP Pk        | 64% | 28.4 | 46.88944 | Ref | 0.24  | 0.035 | 0.44 | -0.052 | 0.44  | -0.28 | 0.21  | 21500 | 21600 | 20400 | 30300 | 23700 | 29000 | 18500 | 25800 | 594.9 | 1187.7 | 2 | 0.003  | 2.543 |
| 60S ribosomal protein L14 OS=Sus scrofa GN=RPL14 PE=2 SV=1                  | sp A1XQU3 RL14_PIG,sp Q3T0U2 RL14_BOVIN, tr F1SJQ6 F1SJQ6_PIG                                                                                                                               | IVAI VDVI DQNR | 92% | 43.4 | 51.95916 | Ref | 0.63  | -0.29 | 0.42 | -0.055 | 0.14  | -0.03 | 0.19  | 2780  | 3830  | 2190  | 4020  | 3190  | 3200  | 2960  | 3430  | 830   | 1658   | 2 | 0.0034 | 2.04  |
| Probable rRNA-processing protein EBP2 OS=Homo sapiens GN=EBNA1BP2 PE=1 SV=2 | sp Q99848 EBP2_HUMAN, tr D2HSR8 D2HSR8_AILME, tr E2QVV3 E2QVV3_CANFA, tr F1MUZ0 F1MUZ0_BOVIN, tr F1S312 F1S312_PIG, tr F7H747 F7H747_MACM U, tr Q3T0K6 Q3T0K6_BOVIN, tr Q6IB29 Q6IB29_HUMAN | eSYD DVSS FR   | 82% | 34.2 | 48.24054 | Ref | -0.06 | 0.39  | -0.4 | -0.12  | -0.25 | -0.05 | -0.08 | 12800 | 10500 | 15600 | 10200 | 13600 | 10900 | 13000 | 12600 | 754.9 | 1507.7 | 2 | 0.011  | 7.264 |

|                                                                                                |                                                                                                                                                                                                     |                                            |            |             |                 |            |              |             |              |               |              |              |             |              |              |              |              |              |              |              |              |              |               |          |               |              |
|------------------------------------------------------------------------------------------------|-----------------------------------------------------------------------------------------------------------------------------------------------------------------------------------------------------|--------------------------------------------|------------|-------------|-----------------|------------|--------------|-------------|--------------|---------------|--------------|--------------|-------------|--------------|--------------|--------------|--------------|--------------|--------------|--------------|--------------|--------------|---------------|----------|---------------|--------------|
| <p>Probable rRNA-processing protein<br/>EBP2 OS=Homo sapiens<br/>GN=EBNA1BP2<br/>PE=1 SV=2</p> | <p>sp Q99848 EBP2_HUMAN, tr D2HSR8 D2HSR8_AILME, tr E2QVV3 E2QVV3_CANFA, tr F1MUZ0 F1MUZ0_BOVIN, tr F1S312 F1S312_PI G, tr F7H747 F7H747_MACM U, tr Q3T0K6 Q3T0K6_BOVIN, tr Q6IB29 Q6IB29_HUMAN</p> | <p>gLLk<br/>PGL<br/>NVV<br/>LEGP<br/>k</p> | <p>83%</p> | <p>33.5</p> | <p>45.973</p>   | <p>Ref</p> | <p>-0.13</p> | <p>0.47</p> | <p>-0.77</p> | <p>-0.002</p> | <p>-0.35</p> | <p>-0.01</p> | <p>0.11</p> | <p>1070</p>  | <p>859</p>   | <p>1420</p>  | <p>674</p>   | <p>1260</p>  | <p>864</p>   | <p>1140</p>  | <p>1230</p>  | <p>816.2</p> | <p>2445.5</p> | <p>3</p> | <p>0.0336</p> | <p>13.71</p> |
| <p>Nucleobindin-2<br/>OS=Homo sapiens<br/>GN=NUCB2 PE=1<br/>SV=2</p>                           | <p>sp P80303 NUCB2_HUMAN, tr D3DQX5 D3DQX5_HUMAN, tr E9PKG6 E9PKG6_HUMAN, tr F1S9A4 F1S9A4_PIG, tr F6TKU8 F6TKU8_MACMU, tr F6Y426 F6Y426_HORSE, tr F6YXD8 F6YXD8_HORSE, tr F7IH71 F7IH71_CALJA</p>  | <p>aDIE<br/>Eik</p>                        | <p>84%</p> | <p>38.5</p> | <p>51.81381</p> | <p>Ref</p> | <p>-0.17</p> | <p>0.14</p> | <p>0.068</p> | <p>-0.035</p> | <p>0.25</p>  | <p>-0.13</p> | <p>-0</p>   | <p>16600</p> | <p>13000</p> | <p>17500</p> | <p>18700</p> | <p>19200</p> | <p>20400</p> | <p>16400</p> | <p>17700</p> | <p>713.4</p> | <p>1424.8</p> | <p>2</p> | <p>0.0227</p> | <p>15.91</p> |

|                                                                      |                                                                                                                                                                                                                                     |                           |            |             |                 |            |              |              |              |               |              |              |              |              |              |              |              |              |              |              |              |              |               |          |               |             |
|----------------------------------------------------------------------|-------------------------------------------------------------------------------------------------------------------------------------------------------------------------------------------------------------------------------------|---------------------------|------------|-------------|-----------------|------------|--------------|--------------|--------------|---------------|--------------|--------------|--------------|--------------|--------------|--------------|--------------|--------------|--------------|--------------|--------------|--------------|---------------|----------|---------------|-------------|
| <p>Nucleobindin-2<br/>OS=Homo sapiens<br/>GN=NUCB2 PE=1<br/>SV=2</p> | <p>sp P80303 NUCB2_HUMAN, tr D3DQX5 D3DQX5_HUMAN, tr E9PKG6 E9PKG6_HUMAN, tr F1S9A4 F1S9A4_PIG, tr F6TKU8 F6TKU8_MACMU, tr F6Y426 F6Y426_HORSE, tr F6YXD8 F6YXD8_HORSE, tr F71H71 F71H71_CALJAK</p>                                 | <p>IVTL<br/>EEFLK</p>     | <p>81%</p> | <p>36.1</p> | <p>49.50783</p> | <p>Ref</p> | <p>-0.26</p> | <p>0.18</p>  | <p>-0.15</p> | <p>-9E-04</p> | <p>0.3</p>   | <p>0.039</p> | <p>-0.05</p> | <p>445</p>   | <p>318</p>   | <p>467</p>   | <p>417</p>   | <p>511</p>   | <p>550</p>   | <p>479</p>   | <p>448</p>   | <p>567.4</p> | <p>1699</p>   | <p>3</p> | <p>0.0043</p> | <p>2.54</p> |
| <p>Caveolin-1<br/>OS=Papio anubis<br/>GN=CAV1 PE=3<br/>SV=1</p>      | <p>R6 CAV1_PAPAN, sp A0M8S7 CAV1_FE LCA, sp P33724 CAV1_CANFA, sp P41350 CAV1_RAT, sp P49817 CAV1_MOUSE, sp P79132 CAV1_BOVIN, sp Q03135 CAV1_HUMAN, sp Q07DV9 CAV1_AOTNA, sp Q07DY2 CAV1_NOMLE, sp Q07DZ2 CAV1_COLGU, sp Q07E2</p> | <p>qVY<br/>DAH<br/>TK</p> | <p>82%</p> | <p>39.8</p> | <p>52.58014</p> | <p>Ref</p> | <p>-0.2</p>  | <p>-0.26</p> | <p>0.2</p>   | <p>-0.37</p>  | <p>0.097</p> | <p>-0.68</p> | <p>0.16</p>  | <p>38400</p> | <p>29100</p> | <p>30200</p> | <p>46700</p> | <p>34600</p> | <p>41800</p> | <p>25600</p> | <p>45400</p> | <p>524</p>   | <p>1568.9</p> | <p>3</p> | <p>0.0071</p> | <p>4.54</p> |

|                                                              |                                                                                                                                                                                            |                              |     |      |          |     |        |       |       |       |       |       |       |       |       |       |       |       |       |       |       |       |        |   |        |       |
|--------------------------------------------------------------|--------------------------------------------------------------------------------------------------------------------------------------------------------------------------------------------|------------------------------|-----|------|----------|-----|--------|-------|-------|-------|-------|-------|-------|-------|-------|-------|-------|-------|-------|-------|-------|-------|--------|---|--------|-------|
| Uncharacterized protein OS=Bos taurus GN=Bt.103427 PE=4 SV=1 | tr F1MCA8 F1MCA8_BOVIN, tr F1MSQ9 F1MSQ9_BOVIN                                                                                                                                             | hAA<br>PILPI<br>TEFS<br>DIPR | 91% | 46.5 | 53.64772 | Ref | -0.024 | -0.17 | 0.063 | 0.094 | -0.11 | 0.1   | -0.08 | 1260  | 1250  | 1220  | 1620  | 1820  | 1380  | 1670  | 1460  | 694.4 | 2080.2 | 3 | 0.0124 | 5.971 |
| Uncharacterized protein OS=Bos taurus GN=Bt.103427 PE=4 SV=1 | tr F1MCA8 F1MCA8_BOVIN, tr F1MSQ9 F1MSQ9_BOVIN                                                                                                                                             | nRPP<br>LATS                 | 65% | 34.9 | 52.84336 | Ref | -0.019 | -0.23 | -0.02 | -0.15 | 0.061 | -0.51 | 0.24  | 17900 | 13500 | 12600 | 16500 | 16600 | 16700 | 11700 | 19600 | 622   | 1863.1 | 3 | 0.0254 | 13.61 |
| Annexin A8 OS=Pan troglodytes GN=ANXA8 PE=2 SV=1             | sp A5A6L7 ANXA8_PANTR,s p P13928 ANXA8_HUMAN,s p Q5T2P8 AXA81_HUMAN,s p Q5VT79 AXA82_HUMAN,t r B2R939 B2R939_HUMAN,t r B4DQE1 B4DQE1_HUMAN, tr B4DTF2 B4DTF2_HUMAN, tr F6YNN1 F6YNN1_MACMU | gIGT<br>NEQ<br>AIID<br>VLTK  | 87% | 42.4 | 52.72925 | Ref | 0.068  | 0.001 | -0.1  | 0.17  | 0.2   | 0.21  | -0.24 | 6770  | 5650  | 5860  | 6130  | 8140  | 7260  | 7620  | 5550  | 727.4 | 2179.2 | 3 | 0.0196 | 9.007 |

|                                                               |                                                                                                                                                                                                           |                     |     |      |          |     |        |       |      |       |       |       |       |       |      |       |       |       |       |       |       |       |        |   |        |       |
|---------------------------------------------------------------|-----------------------------------------------------------------------------------------------------------------------------------------------------------------------------------------------------------|---------------------|-----|------|----------|-----|--------|-------|------|-------|-------|-------|-------|-------|------|-------|-------|-------|-------|-------|-------|-------|--------|---|--------|-------|
| Annexin A8 OS=Pan<br>troglodytes<br>GN=ANXA8 PE=2<br>SV=1     | sp A5A6L7 ANXA8_PANTR,s<br>p P13928 ANXA8_HUMAN,s<br>p Q5T2P8 AXA81_HUMAN,s<br>p Q5VT79 AXA82_HUMAN,t<br>r B2R939 B2R939_HUMAN,t<br>r B4DQE1 B4DQE1_HUMAN, tr B4DTF2 B4DTF2_HUMAN, tr F6YNN1 F6YNN1_MACMU | sATH<br>LLR         | 75% | 33.3 | 48.66925 | Ref | 0.28   | -0.02 | 0.25 | -0.25 | 0.52  | -0.01 | -0.35 | 6470  | 7490 | 6630  | 8930  | 6980  | 10400 | 7510  | 5910  | 367.9 | 1100.6 | 3 | 0.0116 | 10.49 |
| Vitamin D-binding protein OS=Bos<br>taurus GN=GC PE=2<br>SV=1 | sp Q3MHN5 VTDB_BOVIN, tr F1N5M2 F1N5M2_BOVIN                                                                                                                                                              | dVcD<br>EGN<br>Tk   | 85% | 36.5 | 49.28396 | Ref | -0.019 | 0.68  | 0.74 | 0.81  | 0.7   | 1.5   | 0.71  | 13900 | 9630 | 17000 | 19800 | 22900 | 18600 | 32700 | 19500 | 817.9 | 1633.8 | 2 | 0.0226 | 13.8  |
| Vitamin D-binding protein OS=Bos<br>taurus GN=GC PE=2<br>SV=1 | sp Q3MHN5 VTDB_BOVIN, tr F1N5M2 F1N5M2_BOVIN                                                                                                                                                              | vLDQ<br>YIFEL<br>SR | 77% | 37.5 | 53.06708 | Ref | 0.046  | 0.61  | 0.67 | 0.83  | 0.077 | 1.9   | 0.86  | 544   | 638  | 1020  | 1200  | 1470  | 764   | 2790  | 1360  | 844   | 1685.9 | 2 | 0.0119 | 7.072 |



|                                                                            |                                                                                                                                                                                                                                            |                 |     |      |          |     |        |      |      |      |      |      |      |       |       |       |       |       |       |       |       |       |        |   |        |       |
|----------------------------------------------------------------------------|--------------------------------------------------------------------------------------------------------------------------------------------------------------------------------------------------------------------------------------------|-----------------|-----|------|----------|-----|--------|------|------|------|------|------|------|-------|-------|-------|-------|-------|-------|-------|-------|-------|--------|---|--------|-------|
| 40S ribosomal protein S21<br>OS=Rattus norvegicus<br>GN=Rps21 PE=1<br>SV=1 | 5 RS21_R<br>AT,sp P63220 RS21_HUMAN,sp P63221 RS21_PIG,sp Q32PB8 RS21_BOVIN,sp Q9CQR2 RS21_MOUSE,tra A2ABW8 A2ABW8_MOUSE,tra D2HT80 D2HT80_AILME,tra D3ZSE0 D3ZSE0_RAT,tra E2RCL4 E2RCL4_CANFA,tra F2X220 F2X220_AILME,tra F6VAR7 F6VAR7 F | mGESDD          | 54% | 29   | 49.29904 | Ref | -0.075 | 0.4  | 0.34 | 0.07 | 0.45 | -0   | 0.27 | 42500 | 34600 | 52200 | 56100 | 51300 | 58100 | 44500 | 53300 | 721.9 | 1441.7 | 2 | 0.0114 | 7.93  |
| 40S ribosomal protein S21<br>OS=Rattus norvegicus<br>GN=Rps21 PE=1<br>SV=1 | 5 RS21_R<br>AT,sp P63220 RS21_HUMAN,sp P63221 RS21_PIG,sp Q32PB8 RS21_BOVIN,sp Q9CQR2 RS21_MOUSE,tra A2ABW8 A2ABW8_MOUSE,tra D2HT80 D2HT80_AILME,tra D3ZSE0 D3ZSE0_RAT,tra E2RCL4 E2RCL4_CANFA,tra F2X220 F2X220_AILME,tra F6VAR7 F6VAR7 F | rMGESD<br>DSILR | 92% | 45.9 | 51.58263 | Ref | 0.091  | 0.37 | 0.41 | 0.11 | 0.29 | -0.1 | 0.35 | 21400 | 20100 | 26400 | 30500 | 27300 | 27000 | 21600 | 29200 | 528.3 | 1581.8 | 3 | 0.0115 | 7.283 |

|                                                                                                                                                                                         |                                                                                                                                                                                                                                                                                                                                   |                                                                                                                                                                                                                                                                                                                                   |                   |      |          |          |       |       |       |       |       |       |       |      |     |     |     |     |      |     |      |       |        |      |        |       |
|-----------------------------------------------------------------------------------------------------------------------------------------------------------------------------------------|-----------------------------------------------------------------------------------------------------------------------------------------------------------------------------------------------------------------------------------------------------------------------------------------------------------------------------------|-----------------------------------------------------------------------------------------------------------------------------------------------------------------------------------------------------------------------------------------------------------------------------------------------------------------------------------|-------------------|------|----------|----------|-------|-------|-------|-------|-------|-------|-------|------|-----|-----|-----|-----|------|-----|------|-------|--------|------|--------|-------|
| cDNA FLJ52535,<br>highly similar to<br>Homo sapiens<br>lysosomal-<br>associated<br>membrane protein<br>2 (LAMP2),<br>transcript variant<br>LAMP2B, mRNA<br>OS=Homo sapiens<br>PE=2 SV=1 | 9 B4DF49<br>_HUMAN,<br>tr B4E2S7<br> B4E2S7_<br>HUMAN,t<br>r D2HJT7<br> D2HJT7_<br>AILME,tr <br>E7EVR5 E<br>7EVR5_H<br>UMAN,tr <br>F1PLJ7 F1<br>PLJ7_CAN<br>FA,tr F6Z<br>9A8 F6Z9<br>A8_HORS<br>E,tr F7AK<br>N2 F7AK<br>N2_CALJA<br>,tr F7AKS<br>6 F7AKS6<br>_CALJA,tr<br> F7BCK9 <br>F7BCK9_<br>MACMU,t<br>r Q3SZJ7 <br>Q3SZJ7_B | sYAG                                                                                                                                                                                                                                                                                                                              | 88%               | 38.1 | 49.21754 | Ref      | -0.29 | -0.14 | -0.28 | -0.44 | 0.28  | -0.28 | 0.082 | 833  | 696 | 835 | 851 | 840 | 1210 | 855 | 1090 | 603.8 | 1205.6 | 2    | 0.0149 | 12.33 |
|                                                                                                                                                                                         | cDNA FLJ52535,<br>highly similar to<br>Homo sapiens<br>lysosomal-<br>associated<br>membrane protein<br>2 (LAMP2),<br>transcript variant<br>LAMP2B, mRNA<br>OS=Homo sapiens<br>PE=2 SV=1                                                                                                                                           | 9 B4DF49<br>_HUMAN,<br>tr B4E2S7<br> B4E2S7_<br>HUMAN,t<br>r D2HJT7<br> D2HJT7_<br>AILME,tr <br>E7EVR5 E<br>7EVR5_H<br>UMAN,tr <br>F1PLJ7 F1<br>PLJ7_CAN<br>FA,tr F6Z<br>9A8 F6Z9<br>A8_HORS<br>E,tr F7AK<br>N2 F7AK<br>N2_CALJA<br>,tr F7AKS<br>6 F7AKS6<br>_CALJA,tr<br> F7BCK9 <br>F7BCK9_<br>MACMU,t<br>r Q3SZJ7 <br>Q3SZJ7_B | yLDF<br>VFA<br>Vk | 64%  | 34.2     | 52.45417 | Ref   | -0.27 | -0.35 | 0.017 | -0.42 | -0.32 | -0.16 | 0.01 | 666 | 418 | 428 | 621 | 506  | 473 | 552  | 617   | 570.7  | 1709 | 3      | 0.019 |

|                                                             |                        |                                                      |     |      |          |     |        |       |       |        |       |       |       |      |       |       |      |      |      |      |      |       |        |   |        |       |
|-------------------------------------------------------------|------------------------|------------------------------------------------------|-----|------|----------|-----|--------|-------|-------|--------|-------|-------|-------|------|-------|-------|------|------|------|------|------|-------|--------|---|--------|-------|
| Uncharacterized protein OS=Bos taurus GN=Bt.43120 PE=4 SV=1 | tr E1BMD6 E1BMD6_BOVIN | eQG<br>YTPS<br>GPG<br>NQN<br>PAG<br>MYP<br>VAG<br>Pk | 90% | 47.2 | 55.17916 | Ref | 0.6    | -0.33 | -0.29 | 0.22   | -0.29 | -0.1  | -0.33 | 1570 | 2270  | 1290  | 1500 | 2340 | 1430 | 1720 | 1450 | 1009  | 3024.5 | 3 | 0.0173 | 5.706 |
| Uncharacterized protein OS=Bos taurus GN=Bt.43120 PE=4 SV=1 | tr E1BMD6 E1BMD6_BOVIN | mVIP<br>NQP<br>PLTA<br>Tk                            | 52% | 32.2 | 52.54016 | Ref | 0.003  | -0.18 | -0.16 | -0.048 | 0.18  | -0.25 | -0.06 | 9140 | 7330  | 7000  | 7950 | 9500 | 9680 | 7530 | 8540 | 678.7 | 2033.2 | 3 | 0.0146 | 7.194 |
| Uncharacterized protein OS=Bos taurus GN=Bt.22353 PE=4 SV=1 | tr F1MI03 F1MI03_BOVIN | gQSP<br>TSPD<br>SR                                   | 51% | 29   | 49.74143 | Ref | -0.082 | -0.38 | 0.27  | 0.05   | 0.56  | -0.6  | 0.61  | 1220 | 832   | 732   | 1290 | 1220 | 1520 | 712  | 1640 | 668.3 | 1334.7 | 2 | 0.0088 | 6.561 |
| Uncharacterized protein OS=Bos taurus GN=Bt.22353 PE=4 SV=1 | tr F1MI03 F1MI03_BOVIN | sQSD<br>SFSY<br>PAID<br>Sk                           | 90% | 45.5 | 53.59462 | Ref | 1      | 0.6   | -0.19 | -0.32  | -0.07 | -0.22 | -0.08 | 7510 | 16800 | 13500 | 8680 | 8770 | 9090 | 8560 | 9370 | 714   | 2139.1 | 3 | 0.0144 | 6.72  |

|                                                                             |                                                                                                                                                                                                                                                                                                                                         |                    |     |      |          |     |        |       |       |       |       |       |       |       |       |       |       |       |       |       |       |       |      |   |        |       |
|-----------------------------------------------------------------------------|-----------------------------------------------------------------------------------------------------------------------------------------------------------------------------------------------------------------------------------------------------------------------------------------------------------------------------------------|--------------------|-----|------|----------|-----|--------|-------|-------|-------|-------|-------|-------|-------|-------|-------|-------|-------|-------|-------|-------|-------|------|---|--------|-------|
| Proteasome subunit alpha type-7<br>OS=Homo sapiens<br>GN=PSMA7 PE=1<br>SV=1 | 8 PSA7_H<br>UMAN,sp<br> Q3ZBG0<br> PSA7_B<br>OVIN,sp <br>Q9Z2U0 <br>PSA7_MO<br>USE,tr A7<br>E3D5 A7E<br>3D5_BOVI<br>N,tr F1PU<br>B5 F1PUB<br>5_CANFA,<br>tr F6WS8<br>9 F6WS8<br>9_MOND<br>O,tr F6ZQ<br>X6 F6ZQX<br>6_HORSE,<br>tr F7DLV7<br> F7DLV7_<br>MONDO,t<br>r F7H5U7<br> F7H5U7_<br>MACMU,t<br>r F7IGD2<br> F7IGD2_<br>k         | aLLE<br>VVQ<br>SGG | 86% | 40   | 50.93436 | Ref | -0.077 | -0.54 | -0.14 | -0.11 | -0.22 | -0.42 | -0.39 | 16300 | 13000 | 10200 | 15200 | 17000 | 13800 | 12600 | 12700 | 570.4 | 1708 | 3 | 0.0054 | 3.175 |
| Proteasome subunit alpha type-7<br>OS=Homo sapiens<br>GN=PSMA7 PE=1<br>SV=1 | 8 PSA7_H<br>UMAN,sp<br> Q3ZBG0<br> PSA7_B<br>OVIN,sp <br>Q9Z2U0 <br>PSA7_MO<br>USE,tr A7<br>E3D5 A7E<br>3D5_BOVI<br>N,tr F1PU<br>B5 F1PUB<br>5_CANFA,<br>tr F6WS8<br>9 F6WS8<br>9_MOND<br>O,tr F6ZQ<br>X6 F6ZQX<br>6_HORSE,<br>tr F7DLV7<br> F7DLV7_<br>MONDO,t<br>r F7H5U7<br> F7H5U7_<br>MACMU,t<br>r F7IGD2<br> F7IGD2_<br>iLNPEEIEK | iLNPEEIEK          | 60% | 32.7 | 52.03376 | Ref | -0.046 | -0.52 | -0.06 | -0.26 | 0.011 | -0.58 | -0.39 | 15600 | 13600 | 10600 | 16400 | 15800 | 16600 | 11500 | 13000 | 847   | 1692 | 2 | 0.0146 | 8.64  |

|                                                                    |                                                                                             |                         |     |      |          |     |       |       |       |        |       |       |       |       |       |       |       |       |       |       |       |       |        |   |        |       |
|--------------------------------------------------------------------|---------------------------------------------------------------------------------------------|-------------------------|-----|------|----------|-----|-------|-------|-------|--------|-------|-------|-------|-------|-------|-------|-------|-------|-------|-------|-------|-------|--------|---|--------|-------|
| Cytosol<br>aminopeptidase<br>OS=Bos taurus<br>GN=LAP3 PE=1<br>SV=3 | sp P00727 AMPL_BOVIN,sp P28838 AMPL_HUMAN, tr F6TQJ2 F6TQJ2_MA CMU, tr F7IIB5 F7IIB5_CALJAK | gLV<br>GIYS             | 88% | 39.7 | 49.40746 | Ref | -0.11 | -0.43 | -0.03 | 0.041  | 0.27  | -0.28 | 0.006 | 6140  | 5090  | 4440  | 6570  | 7590  | 7790  | 5560  | 6710  | 520   | 1556.9 | 3 | 0.0253 | 16.25 |
| Cytosol<br>aminopeptidase<br>OS=Bos taurus<br>GN=LAP3 PE=1<br>SV=3 | sp P00727 AMPL_BOVIN,sp P28838 AMPL_HUMAN, tr F6TQJ2 F6TQJ2_MA CMU, tr F7IIB5 F7IIB5_CALJAK | sAG<br>AcTA<br>AAFL     | 52% | 33   | 53.22637 | Ref | 0.044 | -0.2  | -0.01 | -0.21  | 0.009 | -0.47 | 0.23  | 6110  | 5310  | 4870  | 6220  | 5960  | 6070  | 4560  | 7340  | 589   | 1763.9 | 3 | 0.0253 | 14.31 |
| Peroxiredoxin 2<br>OS=Ovis aries<br>GN=PRDX2 PE=2<br>SV=1          | tr C8BKC5 C8BKC5_SHEEP                                                                      | gLFV<br>IDGK            | 85% | 36.7 | 49.39479 | Ref | 0.2   | -0.2  | 0.067 | -0.069 | 0.015 | -0.08 | -0.25 | 16200 | 16200 | 13300 | 18000 | 18000 | 16700 | 16400 | 14400 | 729   | 1455.9 | 2 | 0.003  | 2.072 |
| Peroxiredoxin 2<br>OS=Ovis aries<br>GN=PRDX2 PE=2<br>SV=1          | tr C8BKC5 C8BKC5_SHEEP                                                                      | qVTV<br>NDL<br>PVG<br>R | 58% | 32.4 | 51.95213 | Ref | 0.17  | -0.17 | -0    | -0.062 | -0.06 | -0.01 | -0.14 | 32700 | 32000 | 27400 | 34500 | 36600 | 31900 | 34500 | 31300 | 751.4 | 1500.8 | 2 | 0.0151 | 10.06 |

|                                                                           |                                                                                                                                                                                                                                                                                                                              |                   |     |      |          |     |      |       |      |        |      |       |       |       |       |       |       |       |       |       |       |       |        |   |        |       |
|---------------------------------------------------------------------------|------------------------------------------------------------------------------------------------------------------------------------------------------------------------------------------------------------------------------------------------------------------------------------------------------------------------------|-------------------|-----|------|----------|-----|------|-------|------|--------|------|-------|-------|-------|-------|-------|-------|-------|-------|-------|-------|-------|--------|---|--------|-------|
| 60S ribosomal protein L15<br>OS=Canis familiaris<br>GN=RPL15 PE=1<br>SV=1 | 3 RL15_C<br>ANFA,sp <br>P61313 R<br>L15_HUM<br>AN,sp P6<br>1314 RL1<br>5_RAT,sp<br> Q4R5B2 <br>RL15_MA<br>CFA,sp Q<br>5EAD6 RL<br>15_BOVIN<br>,sp Q5NV<br>E0 RL15_<br>PONAB,sp<br> Q9CZM2<br> RL15_M<br>OUSE,tr B<br>4DLP4 B4<br>DLP4_HU<br>MAN,tr D<br>2HKU3 D<br>2HKU3_AI<br>LME,tr D<br>3ZU80 D3<br>ZU80_RAT<br>,tr D3ZXA | nTLQ<br>LHR       | 80% | 36.5 | 50.11295 | Ref | 0.36 | 0.18  | 0.35 | -0.16  | 0.42 | -0.19 | 0.14  | 45300 | 49600 | 47600 | 59900 | 46400 | 60600 | 41500 | 51800 | 395.9 | 1184.7 | 3 | 0.0088 | 7.453 |
| 60S ribosomal protein L15<br>OS=Canis familiaris<br>GN=RPL15 PE=1<br>SV=1 | 3 RL15_C<br>ANFA,sp <br>P61313 R<br>L15_HUM<br>AN,sp P6<br>1314 RL1<br>5_RAT,sp<br> Q4R5B2 <br>RL15_MA<br>CFA,sp Q<br>5EAD6 RL<br>15_BOVIN<br>,sp Q5NV<br>E0 RL15_<br>PONAB,sp<br> Q9CZM2<br> RL15_M<br>OUSE,tr B<br>4DLP4 B4<br>DLP4_HU<br>MAN,tr D<br>2HKU3 D<br>2HKU3_AI<br>LME,tr D<br>3ZU80 D3<br>ZU80_RAT<br>,tr D3ZXA | sLQS<br>VAEE<br>R | 67% | 33.5 | 51.50342 | Ref | 0.64 | -0.08 | 0.34 | -0.004 | 0.2  | 0.035 | 0.011 | 42200 | 58200 | 38200 | 57400 | 50000 | 50200 | 46800 | 45700 | 661.9 | 1321.7 | 2 | 0.0113 | 8.558 |

|                                                                                                 |                                                                                                                                                 |                                    |            |             |                 |            |             |             |             |               |             |              |             |              |              |              |              |              |              |              |              |              |               |          |               |              |
|-------------------------------------------------------------------------------------------------|-------------------------------------------------------------------------------------------------------------------------------------------------|------------------------------------|------------|-------------|-----------------|------------|-------------|-------------|-------------|---------------|-------------|--------------|-------------|--------------|--------------|--------------|--------------|--------------|--------------|--------------|--------------|--------------|---------------|----------|---------------|--------------|
| <p>Cytochrome c oxidase subunit 4 isoform 1, mitochondrial OS=Bos taurus GN=COX41 PE=1 SV=1</p> | <p>sp P00423 COX41_BOVIN,sp P10888 COX41_RAT,sp Q9TTT8 COX41_RABIT, tr D7PDS5 D7PDS5_MINFU, tr D7PDS6 D7PDS6_CYN,sp, tr D7PDS7 D7PDS7_ROULE</p> | <p>dYPL<br/>PDV<br/>AHV<br/>k</p>  | <p>82%</p> | <p>40.5</p> | <p>53.32337</p> | <p>Ref</p> | <p>0.24</p> | <p>0.18</p> | <p>0.42</p> | <p>-0.021</p> | <p>0.32</p> | <p>0.024</p> | <p>0.32</p> | <p>14800</p> | <p>14500</p> | <p>15000</p> | <p>19900</p> | <p>16200</p> | <p>17900</p> | <p>15300</p> | <p>18600</p> | <p>621.4</p> | <p>1861</p>   | <p>3</p> | <p>0.0178</p> | <p>9.538</p> |
| <p>Cytochrome c oxidase subunit 4 isoform 1, mitochondrial OS=Bos taurus GN=COX41 PE=1 SV=1</p> | <p>sp P00423 COX41_BOVIN,sp P10888 COX41_RAT,sp Q9TTT8 COX41_RABIT, tr D7PDS5 D7PDS5_MINFU, tr D7PDS6 D7PDS6_CYN,sp, tr D7PDS7 D7PDS7_ROULE</p> | <p>sEDY<br/>ALPS<br/>YVD<br/>R</p> | <p>63%</p> | <p>32.1</p> | <p>50.88317</p> | <p>Ref</p> | <p>0.39</p> | <p>0.19</p> | <p>0.4</p>  | <p>-0.013</p> | <p>0.48</p> | <p>-0.35</p> | <p>0.37</p> | <p>7930</p>  | <p>9500</p>  | <p>8940</p>  | <p>11600</p> | <p>9620</p>  | <p>11800</p> | <p>6950</p>  | <p>11400</p> | <p>859.9</p> | <p>1717.8</p> | <p>2</p> | <p>0.0141</p> | <p>8.227</p> |

|                                                                       |                                                                                                                                                                                                                                |                                      |            |             |                 |            |             |              |             |              |             |              |             |              |              |              |              |              |              |              |              |              |               |          |               |              |
|-----------------------------------------------------------------------|--------------------------------------------------------------------------------------------------------------------------------------------------------------------------------------------------------------------------------|--------------------------------------|------------|-------------|-----------------|------------|-------------|--------------|-------------|--------------|-------------|--------------|-------------|--------------|--------------|--------------|--------------|--------------|--------------|--------------|--------------|--------------|---------------|----------|---------------|--------------|
| <p>Endothelin-converting enzyme 1 OS=Bos taurus GN=ECE1 PE=1 SV=2</p> | <p>sp P42891 ECE1_BOVIN,sp P42893 ECE1_RAT,sp P97739 ECE1_CAVPO,tr D2HCA3 D2HCA3_AILME,tr F1M824 F1M824_RAT,tr F1SU04 F1SU04_PIG,tr F6YGG8 F6YGG8_HORSE,tr Q28010 Q28010_BOVIN,tr Q28868 Q28868_BOVIN,tr Q6IN10 Q6IN10_RAT</p> | <p>aNP<br/>VPD<br/>GHS<br/>R</p>     | <p>54%</p> | <p>30.8</p> | <p>51.09703</p> | <p>Ref</p> | <p>0.31</p> | <p>-0.32</p> | <p>0.18</p> | <p>0.15</p>  | <p>0.55</p> | <p>-0.91</p> | <p>0.28</p> | <p>3610</p>  | <p>3480</p>  | <p>2450</p>  | <p>3870</p>  | <p>4180</p>  | <p>4830</p>  | <p>1830</p>  | <p>4140</p>  | <p>677.4</p> | <p>1352.7</p> | <p>2</p> | <p>0.0082</p> | <p>6.021</p> |
| <p>Endothelin-converting enzyme 1 OS=Bos taurus GN=ECE1 PE=1 SV=2</p> | <p>sp P42891 ECE1_BOVIN,sp P42893 ECE1_RAT,sp P97739 ECE1_CAVPO,tr D2HCA3 D2HCA3_AILME,tr F1M824 F1M824_RAT,tr F1SU04 F1SU04_PIG,tr F6YGG8 F6YGG8_HORSE,tr Q28010 Q28010_BOVIN,tr Q28868 Q28868_BOVIN,tr Q6IN10 Q6IN10_RAT</p> | <p>hTLG<br/>ENIA<br/>DnG<br/>GLk</p> | <p>85%</p> | <p>42.6</p> | <p>53.98319</p> | <p>Ref</p> | <p>0.15</p> | <p>-0.28</p> | <p>0.4</p>  | <p>0.071</p> | <p>0.12</p> | <p>0.2</p>   | <p>0.23</p> | <p>28000</p> | <p>30500</p> | <p>24500</p> | <p>44300</p> | <p>38800</p> | <p>35100</p> | <p>38700</p> | <p>39300</p> | <p>683.4</p> | <p>2047.1</p> | <p>3</p> | <p>0.0152</p> | <p>7.411</p> |



|                                                                      |                                                                                                                                                                                                                                                               |     |      |          |     |        |       |       |        |       |       |       |       |       |       |       |       |       |       |       |       |        |   |        |       |
|----------------------------------------------------------------------|---------------------------------------------------------------------------------------------------------------------------------------------------------------------------------------------------------------------------------------------------------------|-----|------|----------|-----|--------|-------|-------|--------|-------|-------|-------|-------|-------|-------|-------|-------|-------|-------|-------|-------|--------|---|--------|-------|
| Pyruvate kinase isozyme M1<br>OS=Felis catus<br>GN=PKM2 PE=1<br>SV=2 | 9 KPYM_ FELCA,tr  A5D984  A5D984_ BOVIN,tr  B3IVM0  B3IVM0_ HORSE,tr  B3IVM1  B3IVM1_ HORSE,tr  F1MIZ0 F 1MIZ0_B OVIN,tr F 1PHR2 F1 PHR2_CA NFA,tr F1 SHL7 F1S HL7_PIG,t r F1SHL8  F1SHL8_ PIG,tr F6 Q907 F6 Q907_CAL JA,tr F6W IDID 3M5 F6W SPPI 3M5_HOR TAR | 81% | 37.7 | 51.91652 | Ref | -0.002 | 0.077 | -0.11 | -0.016 | -0.12 | 0.27  | -0.35 | 41600 | 35500 | 40700 | 40100 | 47200 | 38500 | 52500 | 34000 | 751.4 | 1500.8 | 2 | 0.0116 | 7.702 |
| Pyruvate kinase isozyme M1<br>OS=Felis catus<br>GN=PKM2 PE=1<br>SV=2 | 9 KPYM_ FELCA,tr  A5D984  A5D984_ BOVIN,tr  B3IVM0  B3IVM0_ HORSE,tr  B3IVM1  B3IVM1_ HORSE,tr  F1MIZ0 F 1MIZ0_B OVIN,tr F 1PHR2 F1 PHR2_CA NFA,tr F1 SHL7 F1S HL7_PIG,t r F1SHL8  F1SHL8_ PIG,tr F6 Q907 F6 Q907_CAL JA,tr F6W VNLA 3M5 F6W MNV 3M5_HOR GK   | 62% | 33.3 | 51.82974 | Ref | 0.32   | 0.22  | -0.12 | -0.3   | -0.18 | -0.01 | -0.15 | 5760  | 6350  | 6430  | 5700  | 5570  | 5270  | 6180  | 5570  | 518.6 | 1552.9 | 3 | 0.0226 | 14.53 |

|                                                                                |                                                                                                                                                                                                                            |                     |     |      |          |     |       |       |       |       |       |       |       |       |       |       |       |       |       |       |       |       |        |   |        |       |
|--------------------------------------------------------------------------------|----------------------------------------------------------------------------------------------------------------------------------------------------------------------------------------------------------------------------|---------------------|-----|------|----------|-----|-------|-------|-------|-------|-------|-------|-------|-------|-------|-------|-------|-------|-------|-------|-------|-------|--------|---|--------|-------|
| Metadherin OS=Bos taurus GN=MTDHP E=2 SV=1                                     | tr Q24JZ4 Q24JZ4_BOVIN                                                                                                                                                                                                     | tIEV AEEE VVR       | 50% | 31.8 | 52.60727 | Ref | -0.14 | -0.21 | -0.18 | -0.25 | -0.02 | -0.17 | -0.22 | 14300 | 12000 | 12400 | 14200 | 14900 | 15300 | 14400 | 13800 | 789.4 | 1576.9 | 2 | 0.0105 | 6.638 |
| Metadherin OS=Bos taurus GN=MTDHP E=2 SV=1                                     | tr Q24JZ4 Q24JZ4_BOVIN                                                                                                                                                                                                     | tLPP AIST EPSV ILSk | 86% | 39.9 | 50.93873 | Ref | -0.44 | -0.32 | -0.2  | -0.25 | 0.14  | -0.2  | -0.17 | 6210  | 3760  | 4420  | 5410  | 5770  | 6590  | 5430  | 5490  | 754.5 | 2260.3 | 3 | 0.0193 | 8.551 |
| 28 kDa heat- and acid-stable phosphoprotein OS=Homo sapiens GN=PDAP1 PE=1 SV=1 | 2 HAP28_HUMAN,s p Q3UHX 2 HAP28_MOUSE,s p Q62785 HAP28_RAT,tr B2RTB0 B2RTB0_MOUSE,tr D2HP72 D2HP72_AILME,tr F1MNS8 F1MNS8_BOVIN,tr F1PU14 F1PU14_CANFA,tr F1REX6 F1REX6_PIG,tr F1RNS8 F1RNS8_PIG,tr F6QSX1 F6QSX1_ORNAN,tr | aDLA R              | 54% | 28.8 | 49.00012 | Ref | 0.029 | 1.2   | 1.1   | 1.1   | 1.4   | 0.89  | 1.7   | 18600 | 17200 | 42600 | 45600 | 49200 | 51000 | 38200 | 65900 | 425.3 | 848.49 | 2 | 0.0119 | 14.06 |

|                                                                                       |                                                                                                                                                                                                                                |                                      |            |             |                 |            |               |             |             |              |             |              |              |              |              |              |              |              |              |              |              |              |               |          |               |              |
|---------------------------------------------------------------------------------------|--------------------------------------------------------------------------------------------------------------------------------------------------------------------------------------------------------------------------------|--------------------------------------|------------|-------------|-----------------|------------|---------------|-------------|-------------|--------------|-------------|--------------|--------------|--------------|--------------|--------------|--------------|--------------|--------------|--------------|--------------|--------------|---------------|----------|---------------|--------------|
| <p>28 kDa heat- and acid-stable phosphoprotein OS=Homo sapiens GN=PDAP1 PE=1 SV=1</p> | <p>2 HAP28_HUMAN,sp Q3UHX2 HAP28_MOUSE,sp Q62785 HAP28_RAT,tr B2RTB0 B2RTB0_MOUSE,tr D2HP72 D2HP72_AILME,tr F1MNS8 F1MNS8_BOVIN,tr F1PU14 F1PU14_CANFA,tr F1REX6 F1REX6_PIG,tr F1RNS8 F1RNS8_PIG,tr F6QXS1 F6QXS1_ORNAN,tr</p> | <p>KGVE<br/>GLID<br/>IENP<br/>NR</p> | <p>83%</p> | <p>40.9</p> | <p>53.47102</p> | <p>Ref</p> | <p>-0.068</p> | <p>0.93</p> | <p>1</p>    | <p>1.2</p>   | <p>1.5</p>  | <p>0.8</p>   | <p>1.8</p>   | <p>15700</p> | <p>12500</p> | <p>27000</p> | <p>32600</p> | <p>41100</p> | <p>43900</p> | <p>27800</p> | <p>53900</p> | <p>721.4</p> | <p>2161.2</p> | <p>3</p> | <p>0.0202</p> | <p>9.342</p> |
| <p>T-complex protein 1 subunit epsilon OS=Homo sapiens GN=CCT5 PE=1 SV=1</p>          | <p>3 TCPE_HUMAN,sp P80316 TCPE_MOUSE,sp Q4R6V2 TCPE_MACFA,sp Q5RF02 TCPE_PONAB,sp Q68FQ0 TCPE_RAT,tr A8K2X8 A8K2X8_HUMAN,tr B2KI54 B2KI54_RHIFE,tr B4DXI1 B4DXI1_HUMAN,tr B4DYC8 B4DYC8_HUMAN,tr B4DZT5 B4DZT5_HUMAN,tr</p>    | <p>g HPI<br/>R</p>                   | <p>69%</p> | <p>30.3</p> | <p>47.24685</p> | <p>Ref</p> | <p>-0.074</p> | <p>0.23</p> | <p>0.28</p> | <p>-0.32</p> | <p>0.38</p> | <p>-0.23</p> | <p>-0.22</p> | <p>5020</p>  | <p>4900</p>  | <p>6560</p>  | <p>7610</p>  | <p>5530</p>  | <p>7840</p>  | <p>5370</p>  | <p>5360</p>  | <p>332.9</p> | <p>995.61</p> | <p>3</p> | <p>0.0044</p> | <p>4.462</p> |

|                                                                                                          |                                                                                                                                                                                                                                                                                                                              |                         |     |      |          |     |       |       |       |       |       |       |       |      |      |      |      |      |      |      |      |       |        |   |        |       |
|----------------------------------------------------------------------------------------------------------|------------------------------------------------------------------------------------------------------------------------------------------------------------------------------------------------------------------------------------------------------------------------------------------------------------------------------|-------------------------|-----|------|----------|-----|-------|-------|-------|-------|-------|-------|-------|------|------|------|------|------|------|------|------|-------|--------|---|--------|-------|
| T-complex protein 1 subunit epsilon<br>OS=Homo sapiens<br>GN=CCT5 PE=1<br>SV=1                           | 3 TCPE_H<br>UMAN,sp<br> P80316 <br>TCPE_MO<br>USE,sp Q<br>4R6V2 TC<br>PE_MACF<br>A,sp Q5R<br>F02 TCPE<br>_PONAB,s<br>p Q68FQ<br>0 TCPE_R<br>AT,tr A8K<br>2X8 A8K2<br>X8_HUMA<br>N,tr B2KI<br>54 B2KI5<br>4_RHIFE,t<br>r B4DXI1 <br>B4DXI1_H<br>UMAN,tr <br>B4DYC8 B<br>4DYC8_H<br>UMAN,tr <br>B4DZT5 B<br>4DZT5_H<br>UMAN,tr | IMGL<br>EALK            | 71% | 33.9 | 50.51299 | Ref | 0.15  | -0.19 | 0.07  | -0.13 | 0.062 | -0.35 | 0.079 | 2050 | 1710 | 1470 | 1970 | 1890 | 1890 | 1480 | 1980 | 495   | 1481.9 | 3 | 0.0023 | 1.542 |
| Uncharacterized protein OS=Canis familiaris<br>GN=TMOD3 PE=4<br>SV=1                                     | tr E2QWL<br>1 E2QWL<br>1_CANFA,<br>tr F6PZY1<br> F6PZY1_<br>HORSE                                                                                                                                                                                                                                                            | fGYQ<br>FTQ<br>QGP<br>R | 64% | 33.3 | 51.8771  | Ref | -0.11 | -0.47 | -0.25 | -0.19 | 0.063 | -0.18 | -0.04 | 5690 | 4590 | 3860 | 5060 | 5800 | 6060 | 5330 | 5850 | 816.9 | 1631.8 | 2 | 0.0135 | 8.285 |
| Putative uncharacterized protein (Fragment)<br>OS=Ailuropoda melanoleuca<br>GN=PANDA_018456<br>PE=4 SV=1 | tr D2I019<br> D2I019_<br>AILME,tr <br>E2RI84 E<br>2RI84_CA<br>NFA                                                                                                                                                                                                                                                            | eNSS<br>EDQ<br>GSk      | 66% | 34.3 | 52.02129 | Ref | -0.3  | -0.24 | -0.16 | -0.19 | 0.18  | -0.63 | 0.007 | 5450 | 3850 | 4350 | 5160 | 5560 | 6280 | 3740 | 5780 | 563.6 | 1687.8 | 3 | 0.0104 | 6.171 |

|                                                                                                          |                                                 |                |     |      |          |     |       |       |       |       |       |       |       |       |       |       |       |       |       |       |       |       |        |   |        |       |
|----------------------------------------------------------------------------------------------------------|-------------------------------------------------|----------------|-----|------|----------|-----|-------|-------|-------|-------|-------|-------|-------|-------|-------|-------|-------|-------|-------|-------|-------|-------|--------|---|--------|-------|
| Putative uncharacterized protein (Fragment)<br>OS=Ailuropoda melanoleuca<br>GN=PANDA_018456<br>PE=4 SV=1 | tr D2I019 D2I019_AILME, tr E2R184 E2R184_CA_NFA | qQSELSAAVER    | 69% | 34.6 | 52.04633 | Ref | -0.44 | -0.22 | -0.04 | -0.21 | 0.11  | -0.44 | -0.05 | 22800 | 14700 | 18500 | 23500 | 23100 | 25100 | 17900 | 23400 | 761.4 | 1520.8 | 2 | 0.0132 | 8.649 |
| cDNA FLJ51794, highly similar to Annexin A4<br>OS=Homo sapiens<br>PE=2 SV=1                              | tr B4DDZ4 B4DDZ4_HUMAN, tr F7GDF3 F7GDF3_MONDO  | gLGT Dn TLIR   | 57% | 32.4 | 52.1187  | Ref | 0.23  | -0.4  | -0.08 | -0.22 | -0.33 | -0.22 | -0.56 | 25100 | 27800 | 19500 | 27400 | 27400 | 22200 | 25000 | 19700 | 740.4 | 1478.8 | 2 | 0.0119 | 8.067 |
| cDNA FLJ51794, highly similar to Annexin A4<br>OS=Homo sapiens<br>PE=2 SV=1                              | tr B4DDZ4 B4DDZ4_HUMAN, tr F7GDF3 F7GDF3_MONDO  | nHLL HVF DEYR  | 76% | 35.5 | 52.70889 | Ref | -0.15 | -0.38 | -0.2  | -0.42 | 0.073 | -0.63 | -0.15 | 1190  | 861   | 793   | 1020  | 959   | 1180  | 757   | 1050  | 437.5 | 1745.9 | 4 | 0.0081 | 4.616 |
| Alpha-2-antiplasmin<br>OS=Bos taurus<br>GN=SERPINF2 PE=1<br>SV=2                                         | sp P28800 A2AP_BOVIN                            | lcQD LGP GAF R | 54% | 31   | 51.27607 | Ref | 0.82  | 0.24  | 0.75  | 0.58  | 0.11  | 0.96  | 0.5   | 2380  | 3460  | 2510  | 4020  | 3930  | 2480  | 4670  | 3370  | 763.9 | 1525.8 | 2 | 0.011  | 7.182 |

|                                                                                                                                                                                  |                                                                                                                                                                                                     |              |     |      |          |     |        |       |       |       |       |       |       |       |       |       |       |       |       |       |       |       |        |   |        |       |
|----------------------------------------------------------------------------------------------------------------------------------------------------------------------------------|-----------------------------------------------------------------------------------------------------------------------------------------------------------------------------------------------------|--------------|-----|------|----------|-----|--------|-------|-------|-------|-------|-------|-------|-------|-------|-------|-------|-------|-------|-------|-------|-------|--------|---|--------|-------|
| Alpha-2-antiplasmin<br>OS=Bos taurus<br>GN=SERPINF2 PE=1<br>SV=2                                                                                                                 | sp P2880<br>0 A2AP_B<br>OVIN                                                                                                                                                                        | IPPLS<br>LLk | 77% | 28.5 | 43.30414 | Ref | 0.64   | 0.36  | 0.89  | 0.77  | -0.04 | 1.1   | 0.22  | 7180  | 10300 | 9200  | 14900 | 15100 | 7520  | 17100 | 9360  | 497   | 1488   | 3 | 0.0119 | 7.968 |
| Dihydrolipoyllysine-<br>residue<br>succinyltransferase<br>component of 2-<br>oxoglutarate<br>dehydrogenase<br>complex,<br>mitochondrial<br>OS=Bos taurus<br>GN=DLST PE=1<br>SV=2 | sp P1117<br>9 ODO2_<br>BOVIN,sp<br> Q9N0F1 <br>ODO2_PI<br>G,tr E1BA<br>P2 E1BAP<br>2_BOVIN,<br>tr E2R0H<br>0 E2R0H0<br>_CANFA,tr<br> F1MEQ3<br> F1MEQ3<br>_BOVIN,tr<br> F7E1R7 <br>F7E1R7_<br>MONDO | aAVE<br>DPR  | 75% | 32.6 | 48.83991 | Ref | 0.0076 | -0.2  | -0.32 | -0.34 | -0.32 | -0.39 | -0.2  | 20500 | 17200 | 16200 | 16700 | 18200 | 16100 | 16000 | 18100 | 531.3 | 1060.6 | 2 | #####  | 0.314 |
| Dihydrolipoyllysine-<br>residue<br>succinyltransferase<br>component of 2-<br>oxoglutarate<br>dehydrogenase<br>complex,<br>mitochondrial<br>OS=Bos taurus<br>GN=DLST PE=1<br>SV=2 | sp P1117<br>9 ODO2_<br>BOVIN,sp<br> Q9N0F1 <br>ODO2_PI<br>G,tr E1BA<br>P2 E1BAP<br>2_BOVIN,<br>tr E2R0H<br>0 E2R0H0<br>_CANFA,tr<br> F1MEQ3<br> F1MEQ3<br>_BOVIN,tr<br> F7E1R7 <br>F7E1R7_<br>MONDO | dDVI<br>TVk  | 57% | 31.2 | 50.87135 | Ref | -0.11  | -0.35 | -0.06 | -0.36 | -0.1  | -0.56 | -0.13 | 25300 | 21200 | 19500 | 26600 | 24000 | 25000 | 19000 | 25400 | 699.4 | 1396.8 | 2 | #####  | 0.507 |

|                                                               |                                                                                                                                                            |                            |     |      |          |     |        |       |       |       |      |       |      |      |      |      |      |      |       |      |      |       |        |   |        |       |
|---------------------------------------------------------------|------------------------------------------------------------------------------------------------------------------------------------------------------------|----------------------------|-----|------|----------|-----|--------|-------|-------|-------|------|-------|------|------|------|------|------|------|-------|------|------|-------|--------|---|--------|-------|
| Prefoldin subunit 4<br>OS=Bos taurus<br>GN=PFDN4 PE=2<br>SV=1 | sp Q2TBR6 PFD4_BOVIN,sp Q9NQP4 PFD4_HUMAN,tr A5GHK3 A5GHK3_PIG,tr E9PQY2 E9PQY2_HUMAN,tr F1MYY3 F1MYY3_BOVIN,tr F7BMN8 F7BMN8_CALJA,tr F7HSD0 F7HSD0_MACMU | KNL<br>QEEI<br>DALE<br>SR  | 77% | 39.3 | 54.11435 | Ref | -0.032 | -0.02 | 0.086 | 0.13  | 0.28 | -0.16 | 0.11 | 4140 | 3530 | 3860 | 4670 | 5300 | 5160  | 3960 | 4730 | 718.4 | 2152.2 | 3 | 0.0151 | 7.003 |
| Prefoldin subunit 4<br>OS=Bos taurus<br>GN=PFDN4 PE=2<br>SV=1 | sp Q2TBR6 PFD4_BOVIN,sp Q9NQP4 PFD4_HUMAN,tr A5GHK3 A5GHK3_PIG,tr E9PQY2 E9PQY2_HUMAN,tr F1MYY3 F1MYY3_BOVIN,tr F7BMN8 F7BMN8_CALJA,tr F7HSD0 F7HSD0_MACMU | VLAD<br>Lk                 | 51% | 27.5 | 48.01493 | Ref | -0.37  | -0.18 | 0.17  | 0.062 | 0.57 | -0.34 | 0.27 | 6880 | 4620 | 5710 | 8160 | 8360 | 10400 | 5790 | 8710 | 422.9 | 1265.8 | 3 | 0.0027 | 2.144 |
| Myosin-10 OS=Bos taurus<br>GN=MYH10<br>PE=2 SV=2              | sp Q27991 MYH10_BOVIN,tr F1SSA6 F1SSA6_PIG                                                                                                                 | eLDD<br>ATEA<br>NEG<br>LSR | 74% | 34.4 | 50.75079 | Ref | -1     | 0.34  | -1.6  | -0.19 | -1.4 | 0.023 | -1.7 | 7490 | 3040 | 8470 | 2550 | 7220 | 2790  | 7650 | 2280 | 912.4 | 1822.9 | 2 | 0.0149 | 8.157 |

|                                                                           |                                                                                                                                                                                                                       |                            |     |      |          |     |      |       |       |        |       |       |       |      |      |      |      |      |       |      |       |       |        |   |        |       |
|---------------------------------------------------------------------------|-----------------------------------------------------------------------------------------------------------------------------------------------------------------------------------------------------------------------|----------------------------|-----|------|----------|-----|------|-------|-------|--------|-------|-------|-------|------|------|------|------|------|-------|------|-------|-------|--------|---|--------|-------|
| Myosin-10 OS=Bos taurus GN=MYH10 PE=2 SV=2                                | sp Q27991 MYH10_BOVIN, tr F1SSA6 F1SSA6_PIG                                                                                                                                                                           | qLEE<br>AEEE<br>ATR        | 55% | 30.5 | 50.54579 | Ref | -1   | 0.28  | -1.7  | -0.09  | -1.2  | -0.03 | -1.3  | 8170 | 3750 | 9950 | 2910 | 9510 | 3830  | 9070 | 3800  | 804.9 | 1607.8 | 2 | 0.0125 | 7.794 |
| Protein DJ-1 OS=Bos taurus GN=PARK7 PE=2 SV=1                             | sp Q5E946 PARK7_BOVIN                                                                                                                                                                                                 | IVEV<br>LVGK               | 50% | 27.2 | 47.76498 | Ref | 0.69 | -0.02 | 0.21  | -0.15  | 0.078 | 0.12  | -0.08 | 2990 | 4360 | 2880 | 3810 | 3260 | 3340  | 3580 | 3110  | 489   | 1463.9 | 3 | 0.0245 | 16.75 |
| Protein DJ-1 OS=Bos taurus GN=PARK7 PE=2 SV=1                             | sp Q5E946 PARK7_BOVIN                                                                                                                                                                                                 | VTTT<br>PLAK               | 75% | 33.1 | 49.22061 | Ref | 0.34 | 0.045 | 0.099 | 0.018  | 0.28  | -0.01 | 0.11  | 8420 | 8960 | 7900 | 9210 | 9600 | 10000 | 8610 | 9280  | 738   | 1473.9 | 2 | 0.0044 | 2.961 |
| Serine/arginine-rich splicing factor 6 OS=Homo sapiens GN=SRSF6 PE=1 SV=2 | 7 SRSF6_HUMAN, sp Q3B7L6 SRSF6_BOVIN, tr A8K588 A8K588_HUMAN, tr F1MX9 F1MX9_BOVIN, tr F1PTE0 F1PTE0_CAF6 F6PIF7 F6PIF7_MONDO, tr F6TV78 F6TV78_CALJA, tr F7GJ43 F7GJ43_MONDO, tr Q06AA0 Q06AA0_PIG, tr Q3TWW8 Q3TWW8 | qAG<br>EVTY<br>ADA<br>HKER | 62% | 33.9 | 54.27601 | Ref | 0.19 | 0.3   | 0.012 | -0.016 | 0.27  | 0.022 | 0.56  | 7150 | 7770 | 9070 | 8340 | 9020 | 9620  | 8440 | 12200 | 546.5 | 2182.1 | 4 | 0.0192 | 8.774 |



|                                                                                              |                                                                                                                                                                                                                           |                                    |            |             |                 |            |               |              |              |               |              |              |              |              |              |              |              |              |              |              |              |              |               |          |               |              |
|----------------------------------------------------------------------------------------------|---------------------------------------------------------------------------------------------------------------------------------------------------------------------------------------------------------------------------|------------------------------------|------------|-------------|-----------------|------------|---------------|--------------|--------------|---------------|--------------|--------------|--------------|--------------|--------------|--------------|--------------|--------------|--------------|--------------|--------------|--------------|---------------|----------|---------------|--------------|
| <p>Serine/arginine-rich splicing factor 6<br/>OS=Homo sapiens<br/>GN=SRSF6 PE=1<br/>SV=2</p> | <p>7 SRSF6_HUMAN,sp Q3B7L6 SRSF6_BOVIN,tr A8K588 A8K588_HUMAN,tr F1MXY9 F1MXY9_BOVIN,tr F1PTE0 F1PTE0_CANFA,tr F6PIF7 F6PIF7_MONDO,tr F6TV78 F6TV78_CALJATR F7GJ43 F7GJ43_MONDO,tr Q06AA0 Q06AA0_PIG,tr Q3TWW8 Q3TWW8</p> | <p>tNEG<br/>VIEF<br/>R</p>         | <p>61%</p> | <p>32.6</p> | <p>51.71475</p> | <p>Ref</p> | <p>0.2</p>    | <p>0.27</p>  | <p>0.33</p>  | <p>-0.084</p> | <p>0.28</p>  | <p>-0.1</p>  | <p>0.26</p>  | <p>21300</p> | <p>19600</p> | <p>22200</p> | <p>26100</p> | <p>21600</p> | <p>24200</p> | <p>19500</p> | <p>24700</p> | <p>684.9</p> | <p>1367.7</p> | <p>2</p> | <p>0.008</p>  | <p>5.868</p> |
| <p>EH domain-containing protein 2<br/>OS=Rattus norvegicus<br/>GN=Ehd2 PE=1<br/>SV=1</p>     | <p>sp Q4V8H8 EHD2_RAT,sp Q8BH64 EHD2_MOUSE,tr D2H814 D2H814_AILME,tr F1PNP7 F1PNP7_CANFA,tr Q2KJ47 Q2KJ47_BOVIN,tr Q8R2X0 Q8R2X0_MOUSE</p>                                                                                | <p>kLNP<br/>FGN<br/>TFLN<br/>R</p> | <p>68%</p> | <p>35.4</p> | <p>52.68852</p> | <p>Ref</p> | <p>-0.028</p> | <p>-0.41</p> | <p>8E-04</p> | <p>-0.27</p>  | <p>-0.24</p> | <p>-0.23</p> | <p>-0.22</p> | <p>1660</p>  | <p>1360</p>  | <p>1130</p>  | <p>1690</p>  | <p>1540</p>  | <p>1370</p>  | <p>1450</p>  | <p>1450</p>  | <p>677.1</p> | <p>2028.2</p> | <p>3</p> | <p>0.0156</p> | <p>7.699</p> |

|                                                                                |                                                                                                                                                                                                                    |                      |     |      |          |     |       |       |       |       |       |       |       |       |       |       |       |       |       |       |       |       |        |   |       |       |
|--------------------------------------------------------------------------------|--------------------------------------------------------------------------------------------------------------------------------------------------------------------------------------------------------------------|----------------------|-----|------|----------|-----|-------|-------|-------|-------|-------|-------|-------|-------|-------|-------|-------|-------|-------|-------|-------|-------|--------|---|-------|-------|
| EH domain-containing protein 2<br>OS=Rattus norvegicus<br>GN=Ehd2 PE=1<br>SV=1 | sp Q4V8H8 EHD2_RAT,sp Q8BH64 EHD2_MOUSE,tr D2H814 D2H814_AILME,tr F1PNP7 F1PNP7_CANFA,tr Q2KJ47 Q2KJ47_BOVIN,tr Q8R2X0 Q8R2X0_MOUSE                                                                                | IEGH<br>GLPT<br>NLPR | 53% | 32.3 | 52.53646 | Ref | -0.27 | -0.34 | -0.02 | -0.22 | -0.09 | -0.21 | -0.07 | 8850  | 6640  | 6890  | 9640  | 9240  | 8830  | 8480  | 9270  | 536.6 | 1606.9 | 3 | 0.012 | 7.439 |
| Histone H3.1<br>OS=Homo sapiens<br>GN=HIST1H3A PE=1<br>SV=2                    | 1 H31_HUMAN,sp P68432 H31_BOVIN,sp P68433 H31_MOUSE,sp P84227 H32_BOVIN,sp P84228 H32_MOUSE,sp Q16695 H31T_HUMAN,sp Q64400 H32_CRILLO,sp Q6LBE8 H32_MUSPA,sp Q6LBF0 H31_MUSPA,sp Q6LED0 H31_RAT,sp Q71DI3 H32_HUMA | kSAP<br>ATG<br>GVK   | 55% | 28.4 | 48.29536 | Ref | 0.23  | 0.23  | -0.55 | 0.1   | 0.2   | 0.15  | 0.31  | 16700 | 18400 | 19900 | 13100 | 22600 | 21000 | 21300 | 23600 | 610.1 | 1827.1 | 3 | 0.004 | 2.201 |

|                                                                         |                                                                                                                                                                                                                                                                                                                                  |                                   |     |      |          |     |      |       |       |      |       |       |       |      |      |      |      |      |      |      |      |       |        |   |        |       |
|-------------------------------------------------------------------------|----------------------------------------------------------------------------------------------------------------------------------------------------------------------------------------------------------------------------------------------------------------------------------------------------------------------------------|-----------------------------------|-----|------|----------|-----|------|-------|-------|------|-------|-------|-------|------|------|------|------|------|------|------|------|-------|--------|---|--------|-------|
| Histone H3.1<br>OS=Homo sapiens<br>GN=HIST1H3A PE=1<br>SV=2             | 1 H31_H<br>UMAN,sp<br> P68432 <br>H31_BOVI<br>N,sp P68<br>433 H31_<br>MOUSE,s<br>p P84227<br> H32_BO<br>VIN,sp P8<br>4228 H32<br>_MOUSE,<br>sp Q1669<br>5 H31T_H<br>UMAN,sp<br> Q64400 <br>H32_CRIL<br>O,sp Q6L<br>BE8 H32_<br>MUSPA,sp<br> Q6LBF0 <br>H31_MUS<br>PA,sp Q6<br>LED0 H31<br>_RAT,sp <br>Q71D13 H<br>32_HUMA        | sAPA<br>TGG<br>Vk                 | 64% | 31.9 | 50.42524 | Ref | 0.37 | 0.47  | -0.71 | 0.11 | 0.037 | 0.092 | -0.02 | 6400 | 6700 | 7800 | 3860 | 7490 | 6220 | 6750 | 6190 | 698.4 | 1394.8 | 2 | 0.0058 | 4.18  |
| Tax1-binding<br>protein 3 OS=Homo<br>sapiens<br>GN=TAX1BP3 PE=1<br>SV=2 | 7 TX1B3_<br>HUMAN,s<br>p Q9DBG<br>9 TX1B3_<br>MOUSE,tr<br> A2SZV5 <br>A2SZV5_P<br>IG,tr B2K<br>GB7 B2K<br>GB7_MO<br>USE,tr D4<br>ADL4 D4<br>ADL4_RA<br>T,tr E2R9J<br>0 E2R9J0<br>_CANFA,tr<br> F2Z516 <br>F2Z516_PI<br>G,tr F6WI<br>C5 F6WIC<br>5_HORSE,<br>tr F6XW7<br>6 F6XW7<br>6_CALJA,t<br>r F7E319 <br>F7E319_M<br>ACMU,tr | vSEG<br>GPA<br>EIAG<br>LQIG<br>DK | 95% | 58   | 54.13866 | Ref | 0.44 | -0.16 | 0.37  | 0.22 | 0.15  | -0.15 | -0.16 | 4200 | 5170 | 3710 | 6000 | 5960 | 4940 | 4200 | 4130 | 750.4 | 2248.2 | 3 | 0.0183 | 8.138 |

|                                                                                    |                                                                                                                                                                                                                                                                                                                                                            |                                       |           |            |             |                 |            |              |              |              |              |              |              |              |             |             |             |             |             |             |             |             |              |               |          |               |              |
|------------------------------------------------------------------------------------|------------------------------------------------------------------------------------------------------------------------------------------------------------------------------------------------------------------------------------------------------------------------------------------------------------------------------------------------------------|---------------------------------------|-----------|------------|-------------|-----------------|------------|--------------|--------------|--------------|--------------|--------------|--------------|--------------|-------------|-------------|-------------|-------------|-------------|-------------|-------------|-------------|--------------|---------------|----------|---------------|--------------|
| <p>Tax1-binding<br/>protein 3 OS=Homo<br/>sapiens<br/>GN=TAX1BP3 PE=1<br/>SV=2</p> | <p>7 TX1B3_ HUMAN,s<br/>p Q9DBG<br/>9 TX1B3_ MOUSE,tr<br/> A2SZV5 <br/>A2SZV5_P<br/>IG,tr B2K<br/>GB7 B2K<br/>GB7_MO<br/>USE,tr D4<br/>ADL4 D4<br/>ADL4_RA<br/>T,tr E2R9J<br/>0 E2R9J0<br/>_CANFA,tr<br/> F2Z516 <br/>F2Z516_PI<br/>G,tr F6WI<br/>C5 F6WIC<br/>5_HORSE,<br/>tr F6XW7<br/>6 F6XW7<br/>6_CALJA,t<br/>r F7E3I9 <br/>F7E3I9_M<br/>ACMU,tr </p> | <p>vSEG<br/>GPA<br/>EIAG<br/>LQIG</p> | <p>Dk</p> | <p>89%</p> | <p>44.8</p> | <p>53.80866</p> | <p>Ref</p> | <p>0.095</p> | <p>0.083</p> | <p>0.015</p> | <p>0.45</p>  | <p>-0.22</p> | <p>0.24</p>  | <p>-0.01</p> | <p>6290</p> | <p>5610</p> | <p>6040</p> | <p>6460</p> | <p>9620</p> | <p>5280</p> | <p>7600</p> | <p>6330</p> | <p>750.4</p> | <p>2248.3</p> | <p>3</p> | <p>#####</p>  | <p>0.403</p> |
| <p>Dystrglycan<br/>OS=Bos taurus<br/>GN=DAG1 PE=1<br/>SV=1</p>                     | <p>sp O1873<br/>8 DAG1_<br/>BOVIN,sp<br/> Q14118 <br/>DAG1_HU<br/>MAN,tr F<br/>1N7D7 F1<br/>N7D7_BO<br/>VIN,tr F6<br/>RU72 F6R<br/>U72_MAC<br/>MU,tr F6<br/>TRX4 F6T<br/>RX4_CALJ<br/>A,tr F6X9<br/>U4 F6X9U<br/>4_HORSE</p>                                                                                                                               | <p>gGLS<br/>AVD<br/>AFEI<br/>HVH</p>  | <p>R</p>  | <p>62%</p> | <p>35.2</p> | <p>53.75609</p> | <p>Ref</p> | <p>0.072</p> | <p>0.12</p>  | <p>-0.12</p> | <p>-0.11</p> | <p>0.003</p> | <p>-0.12</p> | <p>-0.01</p> | <p>3740</p> | <p>3860</p> | <p>4320</p> | <p>4120</p> | <p>4570</p> | <p>4310</p> | <p>4120</p> | <p>4450</p> | <p>638</p>   | <p>1911</p>   | <p>3</p> | <p>0.0108</p> | <p>5.637</p> |

|                                                                                          |                                                                                                                                      |                                                 |     |      |          |     |       |       |       |       |       |       |       |      |      |      |      |      |      |      |      |       |        |   |        |       |
|------------------------------------------------------------------------------------------|--------------------------------------------------------------------------------------------------------------------------------------|-------------------------------------------------|-----|------|----------|-----|-------|-------|-------|-------|-------|-------|-------|------|------|------|------|------|------|------|------|-------|--------|---|--------|-------|
| Dystrglycan<br>OS=Bos taurus<br>GN=DAG1 PE=1<br>SV=1                                     | sp O18738 DAG1_BOVIN,sp Q14118 DAG1_HUMAN,tr F1N7D7 F1N7D7_BOVIN,tr F6RU72 F6RU72_MACMU,tr F6TRX4 F6TRX4_CALA,tr F6X9U4 F6X9U4_HORSE | gGLS<br>AVD<br>AFEI<br>HVH<br>R                 | 95% | 55.1 | 53.7289  | Ref | -0.13 | -0.18 | -0.1  | -0.2  | -0.03 | -0.1  | 0.22  | 2780 | 1980 | 2070 | 2450 | 2520 | 2480 | 2470 | 3060 | 478.8 | 1911   | 4 | 0.0089 | 4.662 |
| Aspartate<br>aminotransferase,<br>mitochondrial<br>OS=Bos taurus<br>GN=GOT2 PE=1<br>SV=2 | sp P12344 AATM_BOVIN                                                                                                                 | iSVA<br>GVTS<br>GNV<br>AYLA<br>HAIH<br>QVT<br>k | 95% | 57.5 | 53.30811 | Ref | 0.067 | -0.1  | -0.09 | -0.18 | 0.038 | 0.001 | -0.04 | 603  | 588  | 567  | 643  | 663  | 675  | 687  | 662  | 736.9 | 2943.7 | 4 | 0.0211 | 7.17  |
| Aspartate<br>aminotransferase,<br>mitochondrial<br>OS=Bos taurus<br>GN=GOT2 PE=1<br>SV=2 | sp P12344 AATM_BOVIN                                                                                                                 | iSVA<br>GVTS<br>GNV<br>AYLA<br>HAIH<br>QVT<br>k | 95% | 64.9 | 52.92905 | Ref | 0.084 | -0.16 | 0.022 | -0.13 | -0.22 | 0.18  | -0.34 | 1110 | 955  | 877  | 1110 | 1100 | 907  | 1250 | 868  | 736.9 | 2943.7 | 4 | 0.0109 | 3.692 |

|                                                                                |                                                                                                                                                                                                                                                                                                                             |                      |     |      |          |     |      |       |      |       |       |       |       |      |      |     |      |      |      |      |      |       |        |   |        |       |
|--------------------------------------------------------------------------------|-----------------------------------------------------------------------------------------------------------------------------------------------------------------------------------------------------------------------------------------------------------------------------------------------------------------------------|----------------------|-----|------|----------|-----|------|-------|------|-------|-------|-------|-------|------|------|-----|------|------|------|------|------|-------|--------|---|--------|-------|
| Proteasome subunit<br>alpha type-5<br>OS=Homo sapiens<br>GN=PSMA5 PE=1<br>SV=3 | 6 PSA5_H<br>UMAN,sp<br> Q5E987 <br>PSA5_BO<br>VIN,sp Q<br>9Z2U1 PS<br>A5_MOUS<br>E,tr D3YX<br>79 D3YX7<br>9_MOUSE<br>,tr E2R4H<br>4 E2R4H4<br>_CANFA,tr<br> F2Z5K2 <br>F2Z5K2_PI<br>G,tr F6Q<br>W93 F6Q<br>W93_MO<br>NDO,tr F<br>6UT72 F6<br>UT72_OR<br>NAN,tr F6<br>VEA3 F6V<br>EA3_HOR<br>SE,tr F6V<br>LE9 F6VL<br>E9_MAC | IFQV<br>EYAI<br>EAIK | 95% | 55.1 | 52.17102 | Ref | 0.5  | -0.28 | 0.22 | -0.23 | -0.12 | -0.25 | -0.32 | 1370 | 1450 | 919 | 1450 | 1170 | 1110 | 1060 | 1000 | 678.1 | 2031.2 | 3 | 0.0132 | 6.488 |
| Proteasome subunit<br>alpha type-5<br>OS=Homo sapiens<br>GN=PSMA5 PE=1<br>SV=3 | 6 PSA5_H<br>UMAN,sp<br> Q5E987 <br>PSA5_BO<br>VIN,sp Q<br>9Z2U1 PS<br>A5_MOUS<br>E,tr D3YX<br>79 D3YX7<br>9_MOUSE<br>,tr E2R4H<br>4 E2R4H4<br>_CANFA,tr<br> F2Z5K2 <br>F2Z5K2_PI<br>G,tr F6Q<br>W93 F6Q<br>W93_MO<br>NDO,tr F<br>6UT72 F6<br>UT72_OR<br>NAN,tr F6<br>VEA3 F6V<br>EA3_HOR<br>SE,tr F6V<br>LE9 F6VL<br>E9_MAC | IFQV<br>EYAI<br>EAIK | 75% | 36.5 | 52.07365 | Ref | 0.22 | -0.59 | 0.37 | 0.019 | -0.16 | 0.31  | -0.2  | 362  | 436  | 269 | 589  | 509  | 393  | 568  | 395  | 678.1 | 2031.2 | 3 | 0.0099 | 4.864 |

|                                                                              |                                                                                                                                                                                                                          |                           |     |      |          |     |       |       |      |       |      |      |      |      |      |     |      |      |      |     |      |       |        |   |        |       |
|------------------------------------------------------------------------------|--------------------------------------------------------------------------------------------------------------------------------------------------------------------------------------------------------------------------|---------------------------|-----|------|----------|-----|-------|-------|------|-------|------|------|------|------|------|-----|------|------|------|-----|------|-------|--------|---|--------|-------|
| Hematopoietic progenitor cell antigen CD34 OS=Homo sapiens GN=CD34 PE=1 SV=2 | 6 CD34_HUMAN,sp Q64314 CD34_MOUSE,tra A8KAG5 A8KAG5_HUMAN,tra B1PLB1 B1PLB1_RAT,tra B4DG27 B4DG27_HUMAN,tra B4DUX4 B4DUX4_HUMAN,tra D2HUI0 D2HUI0_AILME,tra F1MN25 F1MN25_BOVIN,tra F1PE59 F1PE59_CANFA,tra F1SF32 F1SF3 | gAQ<br>EnGT<br>GQA<br>TSR | 95% | 45   | 50.01418 | Ref | -0.5  | -0.93 | 0.53 | -0.18 | 0.67 | -1.6 | 0.64 | 1820 | 1100 | 885 | 2720 | 1840 | 2900 | 623 | 2930 | 791.4 | 1580.8 | 2 | 0.0091 | 5.778 |
|                                                                              | 6 CD34_HUMAN,sp Q64314 CD34_MOUSE,tra A8KAG5 A8KAG5_HUMAN,tra B1PLB1 B1PLB1_RAT,tra B4DG27 B4DG27_HUMAN,tra B4DUX4 B4DUX4_HUMAN,tra D2HUI0 D2HUI0_AILME,tra F1MN25 F1MN25_BOVIN,tra F1PE59 F1PE59_CANFA,tra F1SF32 F1SF3 | gAQ<br>EnGT<br>GQA<br>TSR | 95% | 53.7 | 49.98412 | Ref | -0.59 | -0.91 | 0.67 | -0.17 | 0.48 | -1.8 | 0.79 | 1350 | 798  | 696 | 2340 | 1440 | 1960 | 427 | 2520 | 791.4 | 1580.8 | 2 | 0.0079 | 5.007 |

|                                                                                |                                                                                                                                                                                                            |                          |     |      |          |     |       |       |       |       |       |       |       |       |       |       |       |       |       |       |       |     |      |   |        |       |
|--------------------------------------------------------------------------------|------------------------------------------------------------------------------------------------------------------------------------------------------------------------------------------------------------|--------------------------|-----|------|----------|-----|-------|-------|-------|-------|-------|-------|-------|-------|-------|-------|-------|-------|-------|-------|-------|-----|------|---|--------|-------|
| Small ubiquitin-related modifier 3<br>OS=Homo sapiens<br>GN=SUMO3 PE=1<br>SV=2 | 4 SUMO3_HUMAN,sp P61955 SUMO2_BOVIN,sp P61956 SUMO2_HUMAN,sp P61957 SUMO2_MOUSE,sp P61958 SUMO2_PIG,sp P61959 SUMO2_RAT,sp Q17QV3 SUMO3_BOVIN,sp Q2PFW2 SUMO2_MACFA,sp Q5XF4 SUMO3_RAT,sp Q6EEV6 SUMO4_QFk | VAG<br>QDG<br>SVV<br>QFk | 95% | 66.4 | 53.33343 | Ref | -0.61 | -0.01 | -0    | 0.16  | 0.5   | -0.2  | 0.36  | 36800 | 23700 | 39200 | 44100 | 54300 | 60400 | 38700 | 56700 | 922 | 1842 | 2 | 0.0173 | 9.39  |
| Small ubiquitin-related modifier 3<br>OS=Homo sapiens<br>GN=SUMO3 PE=1<br>SV=2 | 4 SUMO3_HUMAN,sp P61955 SUMO2_BOVIN,sp P61956 SUMO2_HUMAN,sp P61957 SUMO2_MOUSE,sp P61958 SUMO2_PIG,sp P61959 SUMO2_RAT,sp Q17QV3 SUMO3_BOVIN,sp Q2PFW2 SUMO2_MACFA,sp Q5XF4 SUMO3_RAT,sp Q6EEV6 SUMO4_QFk | VAG<br>QDG<br>SVV<br>QFk | 95% | 51.8 | 53.23504 | Ref | -0.04 | 0.011 | 0.016 | 0.061 | 0.083 | -0.05 | 0.042 | 14500 | 10900 | 12300 | 13800 | 15700 | 13900 | 13300 | 14000 | 615 | 1842 | 3 | 0.0166 | 9.003 |



|                                              |                                                                                                                                                                                                                                                             |          |     |      |          |     |       |       |       |       |       |       |       |       |       |       |       |       |       |       |       |     |      |   |        |       |
|----------------------------------------------|-------------------------------------------------------------------------------------------------------------------------------------------------------------------------------------------------------------------------------------------------------------|----------|-----|------|----------|-----|-------|-------|-------|-------|-------|-------|-------|-------|-------|-------|-------|-------|-------|-------|-------|-----|------|---|--------|-------|
| Calponin-2 OS=Mus musculus GN=Cnn2 PE=2 SV=1 | 3 CNN2_MOUSE,sp Q3SYU6 CNN2_BOVIN,sp Q5RFN6 CNN2_PONAB,sp Q99439 CNN2_HUMAN,transcript B4DDF4 B4DDF4_HUMAN,transcript B4DHU5 B4DHU5_HUMAN,transcript B4DUT8 B4DUT8_HUMAN,transcript E2R5Q1 E2R5Q1_CANFA,transcript E7ENR3 E7ENR3_HUMAN,transcript F7BIZ6 F7 | gLQSGVDI | 95% | 51.6 | 52.26456 | Ref | 0.016 | 0.027 | -0.24 | -0.2  | -0.19 | 0.13  | -0.22 | 89800 | 80300 | 87800 | 82200 | 92700 | 81600 | 1E+05 | 82600 | 561 | 1680 | 3 | 0.0159 | 9.438 |
| Calponin-2 OS=Mus musculus GN=Cnn2 PE=2 SV=1 | 3 CNN2_MOUSE,sp Q3SYU6 CNN2_BOVIN,sp Q5RFN6 CNN2_PONAB,sp Q99439 CNN2_HUMAN,transcript B4DDF4 B4DDF4_HUMAN,transcript B4DHU5 B4DHU5_HUMAN,transcript B4DUT8 B4DUT8_HUMAN,transcript E2R5Q1 E2R5Q1_CANFA,transcript E7ENR3 E7ENR3_HUMAN,transcript F7BIZ6 F7 | gLQSGVDI | 95% | 57.5 | 52.10083 | Ref | 0.076 | 0.21  | -0.19 | -0.23 | -0.24 | -0.16 | -0.22 | 21100 | 19000 | 22600 | 19300 | 20600 | 18000 | 19800 | 18900 | 841 | 1680 | 2 | 0.0108 | 6.448 |

|                                                                     |                                                                                                                                                                                                             |                                         |     |      |          |     |                               |       |      |      |      |       |      |       |       |       |       |       |       |       |       |       |        |   |        |       |
|---------------------------------------------------------------------|-------------------------------------------------------------------------------------------------------------------------------------------------------------------------------------------------------------|-----------------------------------------|-----|------|----------|-----|-------------------------------|-------|------|------|------|-------|------|-------|-------|-------|-------|-------|-------|-------|-------|-------|--------|---|--------|-------|
| Cysteine-rich protein 2 OS=Bos taurus GN=CRIP2 PE=2 SV=1            | sp Q0VFX8 CRIP2_BOVIN                                                                                                                                                                                       | gVNT<br>GAV<br>GSYI<br>YDk<br>DPE<br>Gk | 92% | 49.1 | 55.22315 | Ref | 0.025                         | 0.17  | 0.11 | 0.31 | 0.69 | -0.21 | 0.1  | 3420  | 3030  | 3630  | 3930  | 4960  | 5610  | 3140  | 3880  | 961.5 | 2881.5 | 3 | 0.0226 | 7.831 |
| Cysteine-rich protein 2 OS=Bos taurus GN=CRIP2 PE=2 SV=1            | sp Q0VFX8 CRIP2_BOVIN                                                                                                                                                                                       | gVNT<br>GAV<br>GSYI<br>YDk<br>DPE<br>Gk | 95% | 52.4 | 55.15524 | Ref | 0.24                          | 7E-04 | 0.21 | 0.12 | 0.55 | -0.12 | 0.26 | 11700 | 12000 | 11000 | 14400 | 14900 | 17400 | 11500 | 14800 | 721.4 | 2881.5 | 4 | 0.0165 | 5.723 |
| Astrocytic phosphoprotein PEA-15 OS=Homo sapiens GN=PEA15 PE=1 SV=2 | 1 PEA15_HUMAN,sp Q5R529 PEA15_PONAB,sp Q5U318 PEA15_RAT,sp Q62048 PEA15_MOUSE,sp Q9Z297 PEA15_CRIGR, B1AKZ3 B1AKZ3_HUMAN,t B1AKZ4 B1AKZ4_HUMAN,t B1AKZ5 B1AKZ5_HUMAN,t D2I016 D2I016_ALME, D3Z375 D3Z375_MO | rPDL<br>LTM<br>VVD<br>YR                | 95% | 55.3 | 53.45491 | Ref | Value Missing (-0.0011906972) | 0.89  | 0.59 | 0.55 | 0.46 | 0.46  | 0.46 | 5540  | 6972  | 10100 | 9290  | 9950  | 8150  | 8510  | 8430  | 594.7 | 1781   | 3 | 0.0204 | 11.43 |

|                                                                     |                                                                                                                                                                                                                     |                 |     |      |          |     |        |      |      |       |       |      |       |      |      |      |      |      |      |      |      |       |        |   |        |       |
|---------------------------------------------------------------------|---------------------------------------------------------------------------------------------------------------------------------------------------------------------------------------------------------------------|-----------------|-----|------|----------|-----|--------|------|------|-------|-------|------|-------|------|------|------|------|------|------|------|------|-------|--------|---|--------|-------|
| Astrocytic phosphoprotein PEA-15 OS=Homo sapiens GN=PEA15 PE=1 SV=2 | 1 PEA15_HUMAN,sp Q5R529 PEA15_PONAB,sp Q5U318 PEA15_RA T,sp Q62048 PEA15_MOUSE,sp Q9Z297 PEA15_CRIGR,tr B1AKZ3 B1AKZ3_HUMAN,tr B1AKZ4 B1AKZ4_HUMAN,tr B1AKZ5 B1AKZ5_HUMAN,tr D2I016 D2I016_ALME,tr D3Z375 D3Z375_MO | rPDL LTM VVD YR | 95% | 61   | 53.33951 | Ref | -0.065 | 0.86 | 0.45 | 0.54  | 0.66  | 0.42 | 0.41  | 1580 | 1250 | 2590 | 2170 | 2560 | 2420 | 2150 | 2110 | 594.7 | 1781   | 3 | 0.0101 | 5.675 |
| Alpha-1-acid glycoprotein OS=Bos taurus GN=ORM1 PE=2 SV=1           | sp Q3SZR3 A1AG_BOVIN,tr E1BEB5 E1BEB5_BOVIN,tr E1UYU1 E1UYU1_RU PRU,tr F1ME86 F1ME86_BOVIN,tr Q5GN72 Q5GN72_BOVIN                                                                                                   | alQA AFFY LEPR  | 85% | 41.4 | 53.02796 | Ref | -0.35  | -0.1 | -0.4 | -0.61 | -0.73 | 0.15 | 0.005 | 637  | 520  | 671  | 613  | 587  | 470  | 901  | 811  | 577.3 | 1728.9 | 3 | 0.011  | 6.336 |

|                                                                 |                                                                                                                       |                |     |      |          |     |        |       |       |       |       |       |       |      |      |      |       |      |       |      |      |       |        |   |        |       |
|-----------------------------------------------------------------|-----------------------------------------------------------------------------------------------------------------------|----------------|-----|------|----------|-----|--------|-------|-------|-------|-------|-------|-------|------|------|------|-------|------|-------|------|------|-------|--------|---|--------|-------|
| Alpha-1-acid glycoprotein OS=Bos taurus GN=ORM1 PE=2 SV=1       | sp Q3SZR3 A1AG_BOVIN, tr E1BEB5 E1BEB5_BOVIN, tr E1UYU1 E1UYU1_RU PRU, tr F1ME86 F1ME86_BOVIN, tr Q5GN72 Q5GN72_BOVIN | alQA AFFY LEPR | 95% | 59.3 | 53.08878 | Ref | -0.066 | -0.39 | -0.35 | -0.42 | -0.62 | -0.29 | -0.35 | 462  | 329  | 286  | 328   | 344  | 262   | 344  | 329  | 577.3 | 1728.9 | 3 | 0.0102 | 5.92  |
| Costars family protein C6orf115 homolog OS=Bos taurus PE=3 SV=1 | sp Q3ZBN0 CF115_BOVIN                                                                                                 | ILVE EIHR      | 95% | 51.6 | 51.3527  | Ref | 0.066  | -0.59 | 0.69  | 0.088 | 0.67  | -0.38 | 0.4   | 6680 | 6470 | 4460 | 12100 | 8810 | 11600 | 5800 | 9890 | 438.3 | 1311.8 | 3 | 0.0097 | 7.38  |
| Costars family protein C6orf115 homolog OS=Bos taurus PE=3 SV=1 | sp Q3ZBN0 CF115_BOVIN                                                                                                 | ILVE EIHR      | 89% | 42.8 | 51.51808 | Ref | 0.25   | -0.1  | 0.48  | 0.009 | 0.48  | -0.12 | 0.15  | 3310 | 3220 | 2740 | 4610  | 3660 | 4430  | 3040 | 3640 | 438.3 | 1311.8 | 3 | 0.0057 | 4.318 |

|                                                                              |                                                                                                                                                                                                                    |                              |     |      |          |     |       |       |       |       |      |       |       |     |     |     |     |     |      |     |     |       |        |   |        |       |
|------------------------------------------------------------------------------|--------------------------------------------------------------------------------------------------------------------------------------------------------------------------------------------------------------------|------------------------------|-----|------|----------|-----|-------|-------|-------|-------|------|-------|-------|-----|-----|-----|-----|-----|------|-----|-----|-------|--------|---|--------|-------|
| Calcium-regulated heat stable protein 1 OS=Mus musculus GN=Carhsp1 PE=1 SV=1 | 6 CHSP1_MOUSE,s p Q9WU49 CHSP1_RAT,sp Q9Y2V2 CHSP1_HUMAN,tr D2HCQ6 D2HCQ6_AILME,tr E2QZZ6 E2QZZ6_CANFA,tr F1RKY9 F1RKY9_PIG,tr F6VUJ6 F6VUJ6_HORSE,tr F7F6H6 F7F6H6_MACMU,tr F71981 F71981_CALA,tr F71P66 CALJA,tr | IQAV<br>EVVI<br>THLA<br>PGTk | 95% | 59.3 | 50.28034 | Ref | -0.37 | -0.22 | -0.45 | -0.17 | 0.25 | -0.29 | -0.38 | 965 | 591 | 713 | 682 | 908 | 1060 | 765 | 713 | 571.8 | 2283.4 | 4 | 0.0189 | 8.292 |
| Calcium-regulated heat stable protein 1 OS=Mus musculus GN=Carhsp1 PE=1 SV=1 | 6 CHSP1_MOUSE,s p Q9WU49 CHSP1_RAT,sp Q9Y2V2 CHSP1_HUMAN,tr D2HCQ6 D2HCQ6_AILME,tr E2QZZ6 E2QZZ6_CANFA,tr F1RKY9 F1RKY9_PIG,tr F6VUJ6 F6VUJ6_HORSE,tr F7F6H6 F7F6H6_MACMU,tr F71981 F71981_CALA,tr F71P66 CALJA,tr | IQAV<br>EVVI<br>THLA<br>PGTk | 82% | 37.9 | 50.62913 | Ref | -0.34 | -0.07 | -0.25 | 0.024 | 0.12 | -0.53 | -0.23 | 274 | 209 | 273 | 271 | 360 | 336  | 224 | 273 | 762.1 | 2283.4 | 3 | 0.0255 | 11.17 |

|                                                                                                          |                                                                                                                                                                                        |                            |     |      |          |     |       |       |       |       |       |       |       |      |      |      |      |      |      |      |      |       |        |   |        |       |
|----------------------------------------------------------------------------------------------------------|----------------------------------------------------------------------------------------------------------------------------------------------------------------------------------------|----------------------------|-----|------|----------|-----|-------|-------|-------|-------|-------|-------|-------|------|------|------|------|------|------|------|------|-------|--------|---|--------|-------|
| Putative uncharacterized protein (Fragment)<br>OS=Ailuropoda melanoleuca<br>GN=PANDA_010443<br>PE=4 SV=1 | tr D2HH84 D2HH84_AILME,t<br>r E2QS21 E2QS21_CANFA,tr <br>E2QXN0 E2QXN0_CANFA,tr <br>F1MH61 F1MH61_BOVIN,tr <br>F1SS16 F1SS16_PI<br>G,tr F6VV66 F6VV66_HORSE,<br>tr F7CK98 F7CK98_MONDO | TTITL<br>AHLL<br>AAR       | 95% | 50.7 | 49.98839 | Ref | -0.34 | -0.94 | -0.72 | -1.2  | -0.97 | -0.83 | -0.81 | 2740 | 1450 | 1040 | 1360 | 1090 | 1100 | 1270 | 1270 | 529   | 1584   | 3 | 0.0078 | 4.924 |
| Putative uncharacterized protein (Fragment)<br>OS=Ailuropoda melanoleuca<br>GN=PANDA_010443<br>PE=4 SV=1 | tr D2HH84 D2HH84_AILME,t<br>r E2QS21 E2QS21_CANFA,tr <br>E2QXN0 E2QXN0_CANFA,tr <br>F1MH61 F1MH61_BOVIN,tr <br>F1SS16 F1SS16_PI<br>G,tr F6VV66 F6VV66_HORSE,<br>tr F7CK98 F7CK98_MONDO | TTITL<br>AHLL<br>AAR       | 95% | 71   | 50.11744 | Ref | -0.28 | -0.72 | -0.38 | -0.74 | -0.77 | -0.84 | -0.64 | 1920 | 1940 | 1550 | 2200 | 1880 | 1620 | 1610 | 1830 | 529   | 1584   | 3 | 0.0085 | 5.378 |
| Uncharacterized protein (Fragment)<br>OS=Bos taurus<br>GN=Bt.14715 PE=3<br>SV=1                          | tr F1MZN6 F1MZN6_BOVIN,<br>tr Q3SZH5 Q3SZH5_BOVIN                                                                                                                                      | kVEA<br>LTFQ<br>HNFL<br>TR | 95% | 52.7 | 53.04512 | Ref | 0.9   | 0.17  | 0.5   | 0.4   | 0.12  | 0.96  | 0.52  | 1450 | 2150 | 1400 | 1990 | 2040 | 1470 | 2740 | 2000 | 771.4 | 2311.3 | 3 | 0.0116 | 5.004 |

|                                                                        |                                                                        |                            |     |      |          |     |       |       |       |        |       |       |       |       |      |       |       |       |      |       |       |       |        |   |        |       |
|------------------------------------------------------------------------|------------------------------------------------------------------------|----------------------------|-----|------|----------|-----|-------|-------|-------|--------|-------|-------|-------|-------|------|-------|-------|-------|------|-------|-------|-------|--------|---|--------|-------|
| Uncharacterized protein (Fragment) OS=Bos taurus GN=Bt.14715 PE=3 SV=1 | tr F1MZN6 F1MZN6_BOVIN, tr Q3SZH5 Q3SZH5_BOVIN                         | kVEA<br>LTFQ<br>HNFL<br>TR | 95% | 61.5 | 52.81735 | Ref | 0.83  | 0.2   | 0.67  | 0.45   | 0.18  | 1.2   | 0.2   | 526   | 898  | 632   | 982   | 931   | 673  | 1380  | 706   | 771.4 | 2311.3 | 3 | 0.0061 | 2.63  |
| Uncharacterized protein OS=Sus scrofa GN=CD44 PE=4 SV=1                | tr F1SGT4 F1SGT4_PIG, tr F6PQF3 F6PQF3_ORN AN, tr F6PQG1 F6PQG1_ORN AN | yGFI<br>DGH<br>VVIP<br>R   | 95% | 59.9 | 53.00008 | Ref | -0.76 | 0.24  | -0.83 | -0.064 | -0.39 | 0.13  | -0.68 | 8240  | 4470 | 9700  | 5210  | 9740  | 6790 | 10200 | 5740  | 559.6 | 1675.9 | 3 | 0.0125 | 7.426 |
| Uncharacterized protein OS=Sus scrofa GN=CD44 PE=4 SV=1                | tr F1SGT4 F1SGT4_PIG, tr F6PQF3 F6PQF3_ORN AN, tr F6PQG1 F6PQG1_ORN AN | yGFI<br>DGH<br>VVIP<br>R   | 95% | 52.7 | 52.8667  | Ref | -0.62 | -0.01 | -0.75 | -0.089 | -0.38 | 0.079 | -0.62 | 11700 | 6270 | 10400 | 6950  | 12100 | 8670 | 12400 | 7580  | 496   | 1980.1 | 4 | 0.0129 | 6.523 |
| MHC class I antigen (Fragment) OS=Ovis aries PE=4 SV=1                 | tr Q30825 Q30825_SHEEP                                                 | eYIA<br>LNED<br>LR         | 95% | 51.9 | 52.31745 | Ref | 0.12  | -0.18 | 2.6   | -0.17  | -0.09 | 0.076 | 2.6   | 4310  | 5180 | 4540  | 35300 | 5680  | 5230 | 6130  | 35400 | 770.4 | 1538.8 | 2 | 0.0126 | 8.151 |
| MHC class I antigen (Fragment) OS=Ovis aries PE=4 SV=1                 | tr Q30825 Q30825_SHEEP                                                 | eYIA<br>LNED<br>LR         | 92% | 44.3 | 52.34963 | Ref | 0.13  | -0.12 | 2.5   | 0.031  | -0.01 | -0.07 | 2.6   | 5260  | 4130 | 3780  | 26400 | 5180  | 4400 | 4390  | 27300 | 770.4 | 1538.8 | 2 | 0.0117 | 7.592 |

|                                                                     |                                                                                                                                                                                                                       |                  |     |      |          |     |      |                        |                        |       |       |       |       |     |     |                        |                        |     |     |     |     |       |        |   |        |       |
|---------------------------------------------------------------------|-----------------------------------------------------------------------------------------------------------------------------------------------------------------------------------------------------------------------|------------------|-----|------|----------|-----|------|------------------------|------------------------|-------|-------|-------|-------|-----|-----|------------------------|------------------------|-----|-----|-----|-----|-------|--------|---|--------|-------|
| 60S ribosomal protein L9<br>OS=Homo sapiens<br>GN=RPL9 PE=1<br>SV=1 | 9 RL9_HUMAN,sp P51410 RL9_MOUSE,sp Q3SYR7 RL9_BOVIN,sp Q5IFJ7 RL9_MACFA,sp Q5R9Q7 RL9_PONAB,tr D2HRN7 D2HRN7_AILME,tr D3YYQ0 D3YYQ0_MOUSE,tr D9ZLV7 D9ZLV7_AILME,tr E1BCK0 E1BCK0_BOVIN,tr E2R149 E2R149_CANFA,tr F1M | gTV<br>QQA<br>DE | 94% | 42.7 | 48.47788 | Ref | 0.23 | -0.04                  | 0.02                   | -0.36 | 0.085 | -0.61 | -0.04 | 158 | 164 | 147                    | 173                    | 146 | 174 | 112 | 165 | 576.3 | 1150.6 | 2 | 0.0106 | 9.202 |
| 60S ribosomal protein L9<br>OS=Homo sapiens<br>GN=RPL9 PE=1<br>SV=1 | 9 RL9_HUMAN,sp P51410 RL9_MOUSE,sp Q3SYR7 RL9_BOVIN,sp Q5IFJ7 RL9_MACFA,sp Q5R9Q7 RL9_PONAB,tr D2HRN7 D2HRN7_AILME,tr D3YYQ0 D3YYQ0_MOUSE,tr D9ZLV7 D9ZLV7_AILME,tr E1BCK0 E1BCK0_BOVIN,tr E2R149 E2R149_CANFA,tr F1M | gTV<br>QQA<br>DE | 81% | 34.5 | 48.64636 | Ref | 0.31 | Value Missing (-1.409) | Value Missing (-1.575) | 0.1   | 0.37  | 0.018 | 0.32  | 112 | 118 | Value Missing (-1.409) | Value Missing (-1.575) | 137 | 145 | 118 | 144 | 576.3 | 1150.6 | 2 | 0.009  | 7.83  |



|                                                             |                                                                                                                        |                           |     |      |          |     |       |       |       |       |      |       |       |      |      |      |      |      |      |      |      |       |        |   |        |       |
|-------------------------------------------------------------|------------------------------------------------------------------------------------------------------------------------|---------------------------|-----|------|----------|-----|-------|-------|-------|-------|------|-------|-------|------|------|------|------|------|------|------|------|-------|--------|---|--------|-------|
| COL18A1 protein<br>OS=Bos taurus<br>GN=COL18A1 PE=2<br>SV=1 | tr A4FV05 A4FV05_BOVIN, tr A8E654 A8E654_BOVIN, tr E1B744 E1B744_BOVIN, tr E1B935 E1B935_BOVIN, tr F1N6W9 F1N6W9_BOVIN | tAAS<br>FELP<br>ALD<br>GR | 94% | 47.1 | 52.89756 | Ref | 0.042 | -0.23 | -0.34 | -0.3  | 0.14 | -0.34 | -0.02 | 2610 | 2360 | 2120 | 2200 | 2500 | 2960 | 2210 | 2760 | 826.4 | 1650.9 | 2 | 0.0127 | 7.671 |
| COL18A1 protein<br>OS=Bos taurus<br>GN=COL18A1 PE=2<br>SV=1 | tr A4FV05 A4FV05_BOVIN, tr A8E654 A8E654_BOVIN, tr E1B744 E1B744_BOVIN, tr E1B935 E1B935_BOVIN, tr F1N6W9 F1N6W9_BOVIN | tAAS<br>FELP<br>ALD<br>GR | 92% | 45   | 52.89473 | Ref | 0.14  | -0.1  | -0.37 | -0.37 | 0.04 | -0.35 | -0.09 | 3260 | 3090 | 2840 | 2630 | 2910 | 3380 | 2700 | 3200 | 826.4 | 1650.9 | 2 | 0.0111 | 6.715 |

|                                                              |                                                                                                                                                                                                                           |             |     |      |          |     |      |      |      |       |      |       |      |      |      |      |       |      |      |      |       |       |        |   |        |       |
|--------------------------------------------------------------|---------------------------------------------------------------------------------------------------------------------------------------------------------------------------------------------------------------------------|-------------|-----|------|----------|-----|------|------|------|-------|------|-------|------|------|------|------|-------|------|------|------|-------|-------|--------|---|--------|-------|
| Protein CYR61<br>OS=Pan troglodytes<br>GN=CYR61 PE=2<br>SV=1 | 1 CYR61_PANTR,sp O00622 CYR61_HUMAN,tr B4DI61 B4DI61_HUMAN,tr F6RUJ8 F6RUJ8_HORSE,tr F6XGF4 F6XGF4_MACMU,tr F6XHD7 F6XHD7_MACMU,tr F7I1R4 F7I1R4_CALJA,tr F7I427 F7I427_CALJA,tr F8W9U7 F8W9U7_HUMAN,tr Q307G9 Q307G9_EPR | rLPV<br>FGM | 84% | 40.2 | 52.33993 | Ref | 0.01 | 0.28 | 0.65 | 0.058 | 0.25 | 0.3   | 0.83 | 5980 | 5160 | 6770 | 9770  | 7160 | 7130 | 7710 | 11100 | 502.6 | 1504.8 | 3 | 0.011  | 7.319 |
| Protein CYR61<br>OS=Pan troglodytes<br>GN=CYR61 PE=2<br>SV=1 | 1 CYR61_PANTR,sp O00622 CYR61_HUMAN,tr B4DI61 B4DI61_HUMAN,tr F6RUJ8 F6RUJ8_HORSE,tr F6XGF4 F6XGF4_MACMU,tr F6XHD7 F6XHD7_MACMU,tr F7I1R4 F7I1R4_CALJA,tr F7I427 F7I427_CALJA,tr F8W9U7 F8W9U7_HUMAN,tr Q307G9 Q307G9_EPR | rLPV<br>FGM | 92% | 47.2 | 52.49986 | Ref | 0.19 | 0.2  | 0.74 | -0.13 | 0.53 | -0.45 | 1    | 6470 | 6490 | 7120 | 11600 | 6980 | 9660 | 5100 | 14000 | 502.6 | 1504.8 | 3 | 0.0094 | 6.243 |

|                                                                            |                                                                                                                                                                                                                                       |    |     |      |          |     |       |       |       |       |      |      |      |     |     |     |     |     |     |     |     |       |        |   |        |       |
|----------------------------------------------------------------------------|---------------------------------------------------------------------------------------------------------------------------------------------------------------------------------------------------------------------------------------|----|-----|------|----------|-----|-------|-------|-------|-------|------|------|------|-----|-----|-----|-----|-----|-----|-----|-----|-------|--------|---|--------|-------|
| Protein S100-A11<br>OS=Oryctolagus<br>cuniculus<br>GN=S100A11 PE=1<br>SV=2 | 0 S10AB_ RABIT,sp  P31949 S10AB_HUMAN,sp P50543 S10AB_MOUSE,sp Q6B345 S10AB_RAT, tr D2I3J1 D2I3J1_ AILME, tr E2QXH6 E2QXH6_ CANFA, tr F1MX83 F1MX83_ BOVIN, tr F1PFF2 F1PFF2_ CANFA, tr F6 UGT9 F6 UGT9_MA CMU, tr F7 DD73 F7 DD73_CA | Qk | 91% | 47.1 | 53.41765 | Ref | -0.81 | 0.047 | -0.03 | 0.24  | 0.12 | 0.43 | 0.77 | 211 | 100 | 197 | 210 | 278 | 224 | 290 | 365 | 635.7 | 1904.1 | 3 | 0.013  | 6.845 |
| Protein S100-A11<br>OS=Oryctolagus<br>cuniculus<br>GN=S100A11 PE=1<br>SV=2 | 0 S10AB_ RABIT,sp  P31949 S10AB_HUMAN,sp P50543 S10AB_MOUSE,sp Q6B345 S10AB_RAT, tr D2I3J1 D2I3J1_ AILME, tr E2QXH6 E2QXH6_ CANFA, tr F1MX83 F1MX83_ BOVIN, tr F1PFF2 F1PFF2_ CANFA, tr F6 UGT9 F6 UGT9_MA CMU, tr F7 DD73 F7 DD73_CA | Qk | 83% | 40.9 | 53.3854  | Ref | -0.45 | 0.41  | 0.12  | 0.021 | 0.1  | 0.45 | 0.48 | 202 | 135 | 264 | 242 | 250 | 231 | 306 | 311 | 635.7 | 1904.1 | 3 | 0.0116 | 6.089 |

|                                                                         |                                                                                                                                                                                                                |             |     |      |          |     |       |       |       |        |       |       |       |       |       |       |       |       |       |       |       |       |        |   |        |       |
|-------------------------------------------------------------------------|----------------------------------------------------------------------------------------------------------------------------------------------------------------------------------------------------------------|-------------|-----|------|----------|-----|-------|-------|-------|--------|-------|-------|-------|-------|-------|-------|-------|-------|-------|-------|-------|-------|--------|---|--------|-------|
| Adenylyl cyclase-associated protein 1 OS=Mus musculus GN=Cap1 PE=1 SV=4 | sp P40124 CAP1_MOUSE,s<br>p Q08163 CAP1_RAT,sp Q3SYV4 CAP1_BOVIN, tr A6QLB7 A6QLB7_BOVIN, tr F1SMCO F1SMCO_PIG, tr Q3TC53 Q3TC53_MOUSE, tr Q3U0U5 Q3U0U5_MOUSE, tr Q3UNQ0 Q3UNQ0_MOUSE, tr Q3UVJ2 Q3UVJ2_MOUSE | KEPALLELEGk | 82% | 33.6 | 48.6169  | Ref | 0.15  | -0.29 | -0.12 | -0.13  | -0.23 | 0.01  | -0.25 | 19300 | 17500 | 13900 | 17600 | 19300 | 15800 | 19400 | 16100 | 535.6 | 2138.3 | 4 | 0.006  | 2.805 |
| Adenylyl cyclase-associated protein 1 OS=Mus musculus GN=Cap1 PE=1 SV=4 | sp P40124 CAP1_MOUSE,s<br>p Q08163 CAP1_RAT,sp Q3SYV4 CAP1_BOVIN, tr A6QLB7 A6QLB7_BOVIN, tr F1SMCO F1SMCO_PIG, tr Q3TC53 Q3TC53_MOUSE, tr Q3U0U5 Q3U0U5_MOUSE, tr Q3UNQ0 Q3UNQ0_MOUSE, tr Q3UVJ2 Q3UVJ2_MOUSE | KEPALLELEGk | 91% | 41.6 | 48.23076 | Ref | -0.18 | -0.23 | 0.054 | -0.054 | -0.04 | -0.04 | -0.13 | 5760  | 4720  | 4940  | 6770  | 6920  | 6090  | 6370  | 5950  | 713.8 | 2138.3 | 3 | 0.0013 | 0.587 |

|                                                                                           |                                                                                                                                                                                                                            |                            |     |      |          |     |       |       |       |        |      |       |      |      |      |      |      |      |      |      |      |       |        |   |        |       |
|-------------------------------------------------------------------------------------------|----------------------------------------------------------------------------------------------------------------------------------------------------------------------------------------------------------------------------|----------------------------|-----|------|----------|-----|-------|-------|-------|--------|------|-------|------|------|------|------|------|------|------|------|------|-------|--------|---|--------|-------|
| Leucine-rich repeat flightless-interacting protein 1 OS=Homo sapiens GN=LRRFIP1 PE=1 SV=2 | Z4 LRRF1_HUMAN, sp Q3UZ39 LRRF1_MOUSE, sp Q66HF9 LRRF1_RAT, tr A6H5U5 A6H5U5_MOUSE, tr A6QP40 A6QP40_BOVIN, tr B4DPC0 B4DPC0_HUMAN, tr D3ZQT9 D3ZQT9_RAT, tr D4A480 D4A480_RAT, tr D4A4R0 D4A4R0_RAT, tr E2RTD8 E2RTD8_CAN | hAH<br>SILQ<br>FQF<br>AEVk | 91% | 44.6 | 54.15322 | Ref | 0.069 | -0.21 | 0.048 | -0.18  | 0.33 | -0.33 | 0.73 | 2620 | 2330 | 2080 | 2800 | 2640 | 3280 | 2170 | 4480 | 566.6 | 2262.3 | 4 | 0.0204 | 9.002 |
|                                                                                           | Z4 LRRF1_HUMAN, sp Q3UZ39 LRRF1_MOUSE, sp Q66HF9 LRRF1_RAT, tr A6H5U5 A6H5U5_MOUSE, tr A6QP40 A6QP40_BOVIN, tr B4DPC0 B4DPC0_HUMAN, tr D3ZQT9 D3ZQT9_RAT, tr D4A480 D4A480_RAT, tr D4A4R0 D4A4R0_RAT, tr E2RTD8 E2RTD8_CAN | hAH<br>SILQ<br>FQF<br>AEVk | 91% | 47.1 | 54.16908 | Ref | 0.081 | -0.19 | 0.28  | -0.059 | 0.56 | -0.27 | 0.24 | 715  | 674  | 607  | 940  | 820  | 1100 | 647  | 916  | 755.1 | 2262.3 | 3 | 0.0135 | 5.986 |

|                                                          |                                                                                                                                                                                                                                                                                                                     |                          |     |      |          |     |       |       |       |       |       |      |       |      |      |      |      |      |      |      |      |       |        |   |        |       |
|----------------------------------------------------------|---------------------------------------------------------------------------------------------------------------------------------------------------------------------------------------------------------------------------------------------------------------------------------------------------------------------|--------------------------|-----|------|----------|-----|-------|-------|-------|-------|-------|------|-------|------|------|------|------|------|------|------|------|-------|--------|---|--------|-------|
| Prostacyclin synthase OS=Mus musculus GN=Ptgis PE=2 SV=1 | 4 PTGIS_MOUSE,s<br>p Q29626<br> PTGIS_BOVIN,sp <br>Q62969 P<br>TGIS_RAT,<br>tr A2A5T<br>5 A2A5T5_MOUSE,t<br>r D2GVP2<br> D2GVP2<br>_AILME,tr<br> F1MZ09 <br>F1MZ09_<br>BOVIN,tr <br>F1PD41 F<br>1PD41_C<br>ANFA,tr F<br>1PZ83 F1<br>PZ83_CA<br>NFA,tr F1<br>SBE5 F1S<br>BE5_PIG,t<br>r F6YMG<br>4 F6YMG<br>4_HORSE, | hGDI<br>FTVL<br>VGG<br>R | 91% | 45.1 | 52.34414 | Ref | -0.14 | -0.64 | 0.021 | -0.44 | -0.27 | -0.7 | -0.47 | 1930 | 1380 | 1060 | 1880 | 1510 | 1480 | 1150 | 1330 | 525.6 | 1573.9 | 3 | 0.0062 | 3.954 |
| Prostacyclin synthase OS=Mus musculus GN=Ptgis PE=2 SV=1 | 4 PTGIS_MOUSE,s<br>p Q29626<br> PTGIS_BOVIN,sp <br>Q62969 P<br>TGIS_RAT,<br>tr A2A5T<br>5 A2A5T5_MOUSE,t<br>r D2GVP2<br> D2GVP2<br>_AILME,tr<br> F1MZ09 <br>F1MZ09_<br>BOVIN,tr <br>F1PD41 F<br>1PD41_C<br>ANFA,tr F<br>1PZ83 F1<br>PZ83_CA<br>NFA,tr F1<br>SBE5 F1S<br>BE5_PIG,t<br>r F6YMG<br>4 F6YMG<br>4_HORSE, | hGDI<br>FTVL<br>VGG<br>R | 67% | 34.8 | 52.34026 | Ref | 0.013 | -0.63 | -0.12 | -0.46 | -0.3  | -0.5 | -0.26 | 1370 | 1330 | 926  | 1490 | 1290 | 1260 | 1140 | 1350 | 525.6 | 1573.9 | 3 | 0.0057 | 3.592 |

|                                                                              |                                                                                                                                                                                                                                        |           |     |      |          |     |       |       |       |        |       |       |       |      |      |      |      |      |      |      |      |       |        |   |        |       |
|------------------------------------------------------------------------------|----------------------------------------------------------------------------------------------------------------------------------------------------------------------------------------------------------------------------------------|-----------|-----|------|----------|-----|-------|-------|-------|--------|-------|-------|-------|------|------|------|------|------|------|------|------|-------|--------|---|--------|-------|
| Uncharacterized protein (Fragment)<br>OS=Bos taurus<br>GN=CYB5B PE=4<br>SV=1 | tr F2Z4J9 F2Z4J9_BOVIN, tr F6RNJ3 F6RNJ3_MONDO, tr Q0P5F6 Q0P5F6_BOVIN                                                                                                                                                                 | diWLR     | 90% | 44.8 | 52.16153 | Ref | 0.15  | -0.1  | 0.31  | -0.11  | 0.35  | -0.18 | 0.067 | 1920 | 1840 | 1670 | 2500 | 2060 | 2480 | 1790 | 2110 | 471.6 | 1411.8 | 3 | 0.0096 | 6.802 |
| Uncharacterized protein (Fragment)<br>OS=Bos taurus<br>GN=CYB5B PE=4<br>SV=1 | tr F2Z4J9 F2Z4J9_BOVIN, tr F6RNJ3 F6RNJ3_MONDO, tr Q0P5F6 Q0P5F6_BOVIN                                                                                                                                                                 | diWLR     | 91% | 44.8 | 52.06627 | Ref | 0.067 | 0.1   | 0.56  | -0.021 | -0.07 | -0.01 | -0.13 | 3120 | 2870 | 3190 | 4910 | 3620 | 3050 | 3330 | 3040 | 471.6 | 1411.8 | 3 | 0.0067 | 4.722 |
| Importin subunit beta-1 OS=Rattus norvegicus<br>GN=Kpnb1 PE=1<br>SV=1        | 6 IMB1_RAT, sp P70168 IMB1_MOUSE, sp Q14974 IMB1_HUMAN, tr B2RBR9 B2RBR9_HUMAN, tr E1BFV0 E1BFV0_BOVIN, tr E2R2I0 E2R2I0_CANFA, tr F1RWJ5 F1RWJ5_PIG, tr F2Z3Q8 F2Z3Q8_RAT, tr F6Q111 F6Q111_MONDO, tr F7I7IN96 F7I7IN96_CAJA, tr Q3TF | mELITILEK | 90% | 42   | 51.84086 | Ref | -0.4  | -0.28 | 0.011 | -0.13  | -0.37 | -0.29 | -0.23 | 1310 | 855  | 1000 | 1380 | 1380 | 1020 | 1130 | 1160 | 718.4 | 1434.8 | 2 | 0.0018 | 1.254 |

|                                                                             |                                                                                                                                                                                                                                                                                                                                   |                   |     |      |          |     |       |       |       |       |       |       |       |      |      |      |      |      |      |      |      |       |        |   |        |       |
|-----------------------------------------------------------------------------|-----------------------------------------------------------------------------------------------------------------------------------------------------------------------------------------------------------------------------------------------------------------------------------------------------------------------------------|-------------------|-----|------|----------|-----|-------|-------|-------|-------|-------|-------|-------|------|------|------|------|------|------|------|------|-------|--------|---|--------|-------|
| Importin subunit<br>beta-1 OS=Rattus<br>norvegicus<br>GN=Kpnb1 PE=1<br>SV=1 | 6 IMB1_R<br>AT,sp P70<br>168 IMB1<br>_MOUSE,<br>sp Q1497<br>4 IMB1_<br>HUMAN,t<br>r B2RBR9<br> B2RBR9_<br>HUMAN,t<br>r E1BFV0<br> E1BFV0_<br>BOVIN,tr <br>E2R2I0 E<br>2R2I0_CA<br>NFA,tr F1<br>RWJ5 F1<br>RWJ5_PIG<br>,tr F2Z3Q<br>8 F2Z3Q8<br>_RAT,tr F<br>6Q1I1 F6<br>Q1I1_MO<br>NDO,tr F<br>7IN96 F7I<br>N96_CALJ<br>A,tr Q3TF | mELI<br>TILEK     | 74% | 35.6 | 52.00924 | Ref | -0.52 | -0.24 | -0.19 | -0.48 | -0.17 | 0.21  | -0.33 | 179  | 110  | 145  | 169  | 152  | 164  | 224  | 153  | 718.4 | 1434.8 | 2 | 0.0075 | 5.252 |
| Adapter molecule<br>crk OS=Homo<br>sapiens GN=CRK<br>PE=1 SV=2              | 8 CRK_H<br>UMAN,sp<br> Q63768 <br>CRK_RAT,<br>sp Q6401<br>0 CRK_M<br>OUSE,tr <br>D2H8D0 <br>D2H8D0_<br>AILME,tr <br>E1BQ32 E<br>1BQ32_B<br>OVIN,tr E<br>2QWD3 E<br>2QWD3_C<br>ANFA,tr F<br>7BME5 F<br>7BME5_H<br>ORSE,tr F<br>7DCK2 F7<br>DCK2_CAL<br>JA,tr F7D<br>T53 F7DT<br>53_CALJA,<br>tr Q5ND5<br>1 Q5ND5<br>1_MOUSE        | gHFP<br>FTHV<br>R | 89% | 40.9 | 51.568   | Ref | 0.34  | -0.12 | 0.31  | -0.38 | 0.47  | -0.36 | 0.21  | 2670 | 2880 | 2280 | 3440 | 2350 | 3700 | 2180 | 3190 | 351.2 | 1400.8 | 4 | 0.011  | 7.832 |



|                                                                                           |                                                                                                                                                                                                                                                                                                                            |                     |     |      |          |     |      |       |      |        |       |       |       |       |       |       |       |       |       |       |       |       |        |   |        |       |
|-------------------------------------------------------------------------------------------|----------------------------------------------------------------------------------------------------------------------------------------------------------------------------------------------------------------------------------------------------------------------------------------------------------------------------|---------------------|-----|------|----------|-----|------|-------|------|--------|-------|-------|-------|-------|-------|-------|-------|-------|-------|-------|-------|-------|--------|---|--------|-------|
| Adapter molecule<br>crk OS=Homo<br>sapiens GN=CRK<br>PE=1 SV=2                            | 8 CRK_H<br>UMAN,sp<br> Q63768 <br>CRK_RAT,<br>sp Q6401<br>0 CRK_M<br>OUSE,tr <br>D2H8D0 <br>D2H8D0_<br>AILME,tr <br>E1BQ32 E<br>1BQ32_B<br>OVIN,tr E<br>2QWD3 E<br>2QWD3_C<br>ANFA,tr F<br>7BME5 F<br>7BME5_H<br>ORSE,tr F<br>7DCK2 F7<br>DCK2_CAL<br>JA,tr F7D<br>T53 F7DT<br>53_CALJA,<br>tr Q5ND5<br>1 Q5ND5<br>1_MOUSE | gHFP<br>FTHV<br>R   | 85% | 38.4 | 51.59456 | Ref | 0.2  | -0.08 | 0.35 | -0.31  | 0.43  | -0.33 | 0.31  | 1840  | 1870  | 1680  | 2540  | 1760  | 2590  | 1590  | 2470  | 351.2 | 1400.8 | 4 | 0.0044 | 3.124 |
| Peptidyl-prolyl cis-<br>trans isomerase<br>FKBP11 OS=Bos<br>taurus GN=FKBP11<br>PE=2 SV=1 | sp Q2YDL<br>5 FKB11_<br>BOVIN,tr <br>F1MT51 <br>F1MT51_<br>BOVIN,tr <br>F1SPN1 F<br>1SPN1_PI<br>G,tr F7BS<br>X0 F7BSX<br>0_HORSE                                                                                                                                                                                           | viIPS<br>HLAY<br>Gk | 89% | 41.2 | 50.30284 | Ref | 0.11 | -0.11 | 0.15 | -0.077 | 0.064 | -0.22 | 0.034 | 21600 | 20100 | 18700 | 25200 | 23700 | 22800 | 19600 | 23200 | 602.7 | 1805.1 | 3 | 0.0185 | 10.26 |
| Peptidyl-prolyl cis-<br>trans isomerase<br>FKBP11 OS=Bos<br>taurus GN=FKBP11<br>PE=2 SV=1 | sp Q2YDL<br>5 FKB11_<br>BOVIN,tr <br>F1MT51 <br>F1MT51_<br>BOVIN,tr <br>F1SPN1 F<br>1SPN1_PI<br>G,tr F7BS<br>X0 F7BSX<br>0_HORSE                                                                                                                                                                                           | viIPS<br>HLAY<br>Gk | 55% | 30.2 | 50.05502 | Ref | 0.16 | -0.32 | 0.16 | -0.11  | 0.066 | -0.24 | 0.2   | 24700 | 24200 | 18800 | 29500 | 27000 | 26600 | 22400 | 30200 | 602.7 | 1805.1 | 3 | 0.0145 | 8.033 |

|                                                                           |                                                                                                                                                                                                                                                                                                                           |                    |     |      |          |     |       |       |       |       |       |       |      |       |       |       |        |        |       |       |        |       |        |   |        |       |
|---------------------------------------------------------------------------|---------------------------------------------------------------------------------------------------------------------------------------------------------------------------------------------------------------------------------------------------------------------------------------------------------------------------|--------------------|-----|------|----------|-----|-------|-------|-------|-------|-------|-------|------|-------|-------|-------|--------|--------|-------|-------|--------|-------|--------|---|--------|-------|
| Putative RNA-binding protein 3<br>OS=Mus musculus<br>GN=Rbm3 PE=1<br>SV=1 | 6 RBM3_MOUSE,s<br>p P98179<br> RBM3_H<br>UMAN,sp<br> Q925G0<br> RBM3_R<br>AT,tr D2H<br>7N9 D2H<br>7N9_AIL<br>ME,tr D5<br>FGC9 D5F<br>GC9_CRIG<br>R,tr E2R7<br>71 E2R77<br>1_CANFA,<br>tr E2R8T5<br> E2R8T5_<br>CANFA,tr <br>F1SRZ8 F<br>1SRZ8_PI<br>G,tr F6YE<br>U3 F6YEU<br>3_HORSE,<br>tr Q545K<br>5 Q545K5<br>_MOUSE,t | aMn<br>GESL<br>DGR | 83% | 34.7 | 48.20891 | Ref | -0.32 | 0.098 | -0.33 | -0.25 | 0.003 | -0.5  | 0.15 | 1E+05 | 85900 | 1E+05 | 104000 | 121000 | 1E+05 | 93200 | 144000 | 677.8 | 1353.6 | 2 | 0.0116 | 8.541 |
| Putative RNA-binding protein 3<br>OS=Mus musculus<br>GN=Rbm3 PE=1<br>SV=1 | 6 RBM3_MOUSE,s<br>p P98179<br> RBM3_H<br>UMAN,sp<br> Q925G0<br> RBM3_R<br>AT,tr D2H<br>7N9 D2H<br>7N9_AIL<br>ME,tr D5<br>FGC9 D5F<br>GC9_CRIG<br>R,tr E2R7<br>71 E2R77<br>1_CANFA,<br>tr E2R8T5<br> E2R8T5_<br>CANFA,tr <br>F1SRZ8 F<br>1SRZ8_PI<br>G,tr F6YE<br>U3 F6YEU<br>3_HORSE,<br>tr Q545K<br>5 Q545K5<br>_MOUSE,t | aMn<br>GESL<br>DGR | 88% | 37.2 | 48.23585 | Ref | -0.26 | -0.13 | -0.2  | -0.34 | 0.058 | -0.59 | 0.41 | 44100 | 33900 | 40300 | 43000  | 43100  | 49600 | 33100 | 65400  | 677.8 | 1353.6 | 2 | 0.0107 | 7.906 |

|                                                               |                                                                                                                                                                                                                                     |                           |     |      |          |     |      |       |       |        |      |       |      |     |     |     |      |      |      |     |      |       |        |   |        |       |
|---------------------------------------------------------------|-------------------------------------------------------------------------------------------------------------------------------------------------------------------------------------------------------------------------------------|---------------------------|-----|------|----------|-----|------|-------|-------|--------|------|-------|------|-----|-----|-----|------|------|------|-----|------|-------|--------|---|--------|-------|
| Ras-interacting protein 1 OS=Mus musculus GN=Rasip1 PE=1 SV=3 | 6 RAIN_MOUSE,sp Q5U651 RAIN_HUMAN,trap A0JNY4 A0JNY4_MOUSE,trap B9EK92 B9EK92_MOUSE,trap E1BDB1 E1BDB1_BOVIN,trap E2RRM5 E2RRM5_CANFA,trap E9Q3D5 E9Q3D5_MOUSE,trap F1LN01 F1LN01_RAT,trap F6UC01 F6UC01_HORSE,trap F6Y5H3 F6Y5H3_O | IHLP<br>VGL<br>WIN<br>SPR | 87% | 41.6 | 51.59732 | Ref | 0.22 | -0.2  | 0.08  | -0.1   | 0.11 | -0.15 | 0.16 | 914 | 935 | 758 | 1030 | 1000 | 1010 | 887 | 1090 | 602.7 | 1805.1 | 3 | 0.0075 | 4.148 |
| Ras-interacting protein 1 OS=Mus musculus GN=Rasip1 PE=1 SV=3 | 6 RAIN_MOUSE,sp Q5U651 RAIN_HUMAN,trap A0JNY4 A0JNY4_MOUSE,trap B9EK92 B9EK92_MOUSE,trap E1BDB1 E1BDB1_BOVIN,trap E2RRM5 E2RRM5_CANFA,trap E9Q3D5 E9Q3D5_MOUSE,trap F1LN01 F1LN01_RAT,trap F6UC01 F6UC01_HORSE,trap F6Y5H3 F6Y5H3_O | IHLP<br>VGL<br>WIN<br>SPR | 87% | 41.3 | 51.45342 | Ref | 0.2  | -0.37 | 0.071 | -0.046 | 0.35 | -0.34 | 0.14 | 853 | 841 | 619 | 939  | 955  | 1100 | 712 | 981  | 602.7 | 1805.1 | 3 | 0.0049 | 2.736 |

|                                                             |                                                                                                                                                                                                |                          |     |      |          |     |       |       |      |       |      |       |      |       |       |       |       |       |       |       |       |       |        |   |        |       |
|-------------------------------------------------------------|------------------------------------------------------------------------------------------------------------------------------------------------------------------------------------------------|--------------------------|-----|------|----------|-----|-------|-------|------|-------|------|-------|------|-------|-------|-------|-------|-------|-------|-------|-------|-------|--------|---|--------|-------|
| 60S ribosomal protein L29 OS=Bos taurus GN=RPL29 PE=2 SV=3  | sp Q58DW3 RL29_BOVIN                                                                                                                                                                           | akPP<br>AAA<br>APA<br>Ak | 80% | 35.6 | 49.23265 | Ref | 0.083 | 0.79  | 0.81 | 0.65  | 1.3  | 0.47  | 1.4  | 6010  | 5380  | 9550  | 10900 | 10700 | 14300 | 8590  | 16700 | 659.4 | 1975.2 | 3 | 0.0341 | 17.26 |
| 60S ribosomal protein L29 OS=Bos taurus GN=RPL29 PE=2 SV=3  | sp Q58DW3 RL29_BOVIN                                                                                                                                                                           | akPP<br>AAA<br>APA<br>Ak | 87% | 39.2 | 49.23265 | Ref | 0.04  | 0.73  | 0.89 | 0.61  | 1.2  | 0.63  | 1.5  | 12800 | 11700 | 20600 | 25800 | 23400 | 30300 | 21600 | 38500 | 659.4 | 1975.2 | 3 | 0.0341 | 17.26 |
| Uncharacterized protein OS=Bos taurus GN=Bt.62844 PE=4 SV=1 | tr E1B968 E1B968_BOVIN, tr E2RHZ7 E2RHZ7_CANFA, tr E2RI01 E2RI01_CANFA, tr E2RI12 E2RI12_CANFA, tr F6PTA3 F6PTA3_CALJA, tr F6QFQ7 F6QFQ7_CALJA, tr F6WP00 F6WP00_HORSE, tr F6WVX4 F6WVX4_HORSE | nLSL<br>PFIF<br>HEK      | 87% | 42.4 | 52.76875 | Ref | 0.99  | -0.07 | 0.64 | -0.14 | 0.61 | -0.19 | 0.68 | 2090  | 3780  | 1980  | 3620  | 2330  | 3420  | 2050  | 3700  | 651.7 | 1952.1 | 3 | 0.0183 | 9.365 |

|                                                                    |                                                                                                                                                                                                                                     |                      |            |             |                 |            |             |              |              |               |             |              |             |             |             |             |             |             |             |             |             |              |               |          |               |              |
|--------------------------------------------------------------------|-------------------------------------------------------------------------------------------------------------------------------------------------------------------------------------------------------------------------------------|----------------------|------------|-------------|-----------------|------------|-------------|--------------|--------------|---------------|-------------|--------------|-------------|-------------|-------------|-------------|-------------|-------------|-------------|-------------|-------------|--------------|---------------|----------|---------------|--------------|
| <p>Uncharacterized protein OS=Bos taurus GN=Bt.62844 PE=4 SV=1</p> | <p>tr E1B968 E1B968_BOVIN, tr E2RHZ7 E2RHZ7_CANFA, tr E2RI01 E2RI01_CANFA, tr E2RI12 E2RI12_CANFA, tr F6PTA3 F6PTA3_CALJA, tr F6QFQ7 F6QFQ7_CALJA, tr F6WP00 F6WP00_HORSE, tr F6WVX4 F6WVX4_HORSE</p>                               | <p>nLSL PFIF HEK</p> | <p>51%</p> | <p>32.1</p> | <p>52.52401</p> | <p>Ref</p> | <p>0.67</p> | <p>-0.04</p> | <p>0.66</p>  | <p>0.074</p>  | <p>0.59</p> | <p>0.011</p> | <p>0.67</p> | <p>2750</p> | <p>3640</p> | <p>2400</p> | <p>4380</p> | <p>3220</p> | <p>4030</p> | <p>2810</p> | <p>4410</p> | <p>651.7</p> | <p>1952.1</p> | <p>3</p> | <p>0.011</p>  | <p>5.617</p> |
| <p>Calpain small subunit 1 OS=Mus musculus GN=Capns1 PE=2 SV=1</p> | <p>6 CPNS1_MOUSE, sp P04574 CPNS1_PIG, sp P04632 CPNS1_HUMAN, sp P06813 CPNS1_RABBIT, sp P13135 CPNS1_BOVIN, sp Q64537 CPNS1_RAT, tr D3YW48 D3YW48_MOUSE, tr F1M6Z5 F1M6Z5_RAT, tr F6RLT8 F6RLT8_HORSE, tr F6X8A9 F6X8A9_MACMUT</p> | <p>mFL VNSF Lk</p>   | <p>50%</p> | <p>31.3</p> | <p>52.09244</p> | <p>Ref</p> | <p>0.08</p> | <p>-0.34</p> | <p>0.022</p> | <p>-0.074</p> | <p>0.23</p> | <p>-0.43</p> | <p>0.57</p> | <p>1470</p> | <p>1450</p> | <p>1170</p> | <p>1690</p> | <p>1740</p> | <p>1880</p> | <p>1240</p> | <p>2460</p> | <p>722.9</p> | <p>1443.8</p> | <p>2</p> | <p>0.0094</p> | <p>6.495</p> |

|                                                             |                                                                                                                                                                                                                              |                   |     |      |          |     |       |       |       |        |       |       |       |      |      |      |      |       |      |       |      |       |        |   |        |       |
|-------------------------------------------------------------|------------------------------------------------------------------------------------------------------------------------------------------------------------------------------------------------------------------------------|-------------------|-----|------|----------|-----|-------|-------|-------|--------|-------|-------|-------|------|------|------|------|-------|------|-------|------|-------|--------|---|--------|-------|
| Calpain small subunit 1 OS=Mus musculus GN=Capns1 PE=2 SV=1 | 6 CPNS1_MOUSE,s p P04574  CPNS1_P IG,sp P04632 CPNS1_HUMAN,sp P06813 CPNS1_RABIT,s p P13135  CPNS1_BOVIN,sp Q64537 CPNS1_RAT,tr D3YW48 D3YW48_MOUSE, tr F1M6Z5 F1M6Z5_RAT, tr F6RLT8 F6RLT8_HORSE, tr F6X8A9 F6X8A9_MACMU, t | mFL VNSF Lk       | 87% | 40.1 | 52.08245 | Ref | 0.027 | -0.27 | 0.14  | -0.059 | 0.31  | -0.39 | 0.22  | 510  | 425  | 375  | 560  | 537   | 607  | 388   | 588  | 722.9 | 1443.8 | 2 | 0.0123 | 8.516 |
| Reticulon-4 OS=Mus musculus GN=Rtn4 PE=1 SV=2               | 2 RTN4_MOUSE,s p Q9NQC3 RTN4_HUMAN, tr A5A6K0 A5A6K0_PANTR, tr A6XGP7 A6XGP7_HUMAN, tr A7YVI6 A7YVI6_BOVIN, tr B9VGZ5 B9VGZ5_SH EEP, tr D6W5C2 D6W5C2_HUMAN, tr E2R925 E2R925_CANFA, tr F1N405 F1N405_BOVIN, tr F1SQK2 F1SQK | hQA QID HYLK LANK | 85% | 42.7 | 54.19134 | Ref | -0.13 | -0.09 | 0.008 | 0.14   | 0.017 | 0.033 | -0.22 | 9030 | 7440 | 8330 | 9990 | 12100 | 9680 | 10200 | 8530 | 739.4 | 2215.2 | 3 | 0.0191 | 8.619 |

|                                                           |                                                                                                                                                                                                                                                                                                                                    |     |      |          |     |        |       |       |       |       |       |       |      |      |      |      |      |      |      |      |       |        |   |        |       |
|-----------------------------------------------------------|------------------------------------------------------------------------------------------------------------------------------------------------------------------------------------------------------------------------------------------------------------------------------------------------------------------------------------|-----|------|----------|-----|--------|-------|-------|-------|-------|-------|-------|------|------|------|------|------|------|------|------|-------|--------|---|--------|-------|
| Reticulon-4<br>OS=Mus musculus<br>GN=Rtn4 PE=1 SV=2       | 2 RTN4_ MOUSE,s<br>p Q9NQC<br>3 RTN4_ HUMAN,t<br>r A5A6K0<br> A5A6K0_ PANTR,tr <br>A6XGP7 <br>A6XGP7_ HUMAN,t<br>r A7YVI6 <br>A7YVI6_ B<br>OVIN,tr B<br>9VGZ5 B9<br>VGZ5_SH<br>EEP,tr D6<br>W5C2 D6<br>W5C2_ HU<br>MAN,tr E<br>2R925 E2<br>R925_CA<br>NFA,tr F1<br>N405 F1N hQA<br>405_BOVI QID<br>N,tr F1SQ HYLG<br>K2 F1SQK LANK | 68% | 36.9 | 54.14166 | Ref | -0.087 | -0.21 | -0.12 | 0.16  | -0.01 | 0.014 | -0.1  | 4920 | 3880 | 3870 | 4630 | 6170 | 4800 | 5090 | 4660 | 739.4 | 2215.2 | 3 | 0.0175 | 7.875 |
| Acid ceramidase<br>OS=Bos taurus<br>GN=ASAH1 PE=2<br>SV=3 | sp Q17Q ITVY<br>B3 ASAH TVLI<br>1_BOVIN DVTk                                                                                                                                                                                                                                                                                       | 80% | 36.9 | 50.5959  | Ref | 0.19   | -0.47 | -0.32 | -0.38 | -0.67 | -0.3  | -0.79 | 502  | 440  | 303  | 376  | 397  | 284  | 383  | 271  | 658.4 | 1972.2 | 3 | 0.0229 | 11.62 |
| Acid ceramidase<br>OS=Bos taurus<br>GN=ASAH1 PE=2<br>SV=3 | sp Q17Q ITVY<br>B3 ASAH TVLI<br>1_BOVIN DVTk                                                                                                                                                                                                                                                                                       | 85% | 38.3 | 49.85687 | Ref | 0.13   | -0.52 | 0.03  | -0.57 | -0.09 | -0.48 | -0.84 | 212  | 232  | 160  | 263  | 192  | 234  | 186  | 144  | 658.4 | 1972.2 | 3 | 0.0116 | 5.875 |

|                                                                 |                                                                                                                                                                                                                           |               |     |      |          |     |       |       |       |       |       |      |       |      |      |      |      |      |      |      |      |       |        |   |        |       |
|-----------------------------------------------------------------|---------------------------------------------------------------------------------------------------------------------------------------------------------------------------------------------------------------------------|---------------|-----|------|----------|-----|-------|-------|-------|-------|-------|------|-------|------|------|------|------|------|------|------|------|-------|--------|---|--------|-------|
| Cartilage-associated protein OS=Homo sapiens GN=CRTAP PE=1 SV=1 | 8 CRTAP_HUMAN, tr B3KME2 B3KME2_HUMAN, tr B3KQR7 B3KQR7_HUMAN, tr B3KS71 B3KS71_HUMAN, tr B3KUPO B3KUP0_HUMAN, tr B3KX16 B3KX16_HUMAN, tr C9JP16 C9JP16_HUMAN, tr D2HB00 D2HB00_AILM E, tr E1BJ75 E1BJ75_BOVIN, tr E2RCK3 | aIAA AHTF LLk | 84% | 37.2 | 49.32504 | Ref | 0.041 | 0.013 | -0.13 | -0.12 | -0.25 | 0.18 | -0.24 | 5500 | 4660 | 4960 | 5050 | 5580 | 4460 | 6270 | 4670 | 588.7 | 1763.1 | 3 | 0.0196 | 11.13 |
| Cartilage-associated protein OS=Homo sapiens GN=CRTAP PE=1 SV=1 | 8 CRTAP_HUMAN, tr B3KME2 B3KME2_HUMAN, tr B3KQR7 B3KQR7_HUMAN, tr B3KS71 B3KS71_HUMAN, tr B3KUPO B3KUP0_HUMAN, tr B3KX16 B3KX16_HUMAN, tr C9JP16 C9JP16_HUMAN, tr D2HB00 D2HB00_AILM E, tr E1BJ75 E1BJ75_BOVIN, tr E2RCK3 | aIAA AHTF LLk | 80% | 31.9 | 47.7002  | Ref | 0.2   | -0.11 | -0.31 | -0.11 | 0.049 | 0.18 | -0.27 | 1270 | 1340 | 1180 | 1150 | 1460 | 1420 | 1620 | 1180 | 441.8 | 1763.1 | 4 | 0.0043 | 2.418 |



|                                                                      |                                                                                                                                                                                                                              |                         |     |      |          |     |       |       |       |       |       |       |       |     |     |     |     |     |     |     |     |       |      |   |        |       |
|----------------------------------------------------------------------|------------------------------------------------------------------------------------------------------------------------------------------------------------------------------------------------------------------------------|-------------------------|-----|------|----------|-----|-------|-------|-------|-------|-------|-------|-------|-----|-----|-----|-----|-----|-----|-----|-----|-------|------|---|--------|-------|
| Gamma-soluble NSF attachment protein OS=Bos taurus GN=NAPG PE=1 SV=3 | 7 SNAG_BOVIN,sp Q99747 SNAG_HUMAN,sp Q9CWZ7 SNAG_MOUSE,trans B4DFC9 B4DFC9_HUMAN,trans D2HHS6 D2HHS6_ALME,trans D3Z4B2 D3Z4B2_MOUSE,trans D3ZU08 D3ZU08_RAT,trans D4A0E2 D4A0E2_RAT,trans E2R561 E2R561_CAF6Z0B6 F6Z0B6_MACR | tIAQ<br>VLV<br>HLH<br>R | 81% | 36   | 49.28703 | Ref | 0.11  | -0.22 | -0.2  | -0.34 | 0.031 | -0.02 | -0.21 | 809 | 837 | 721 | 822 | 820 | 926 | 931 | 814 | 531   | 1590 | 3 | 0.006  | 3.8   |
| Gamma-soluble NSF attachment protein OS=Bos taurus GN=NAPG PE=1 SV=3 | 7 SNAG_BOVIN,sp Q99747 SNAG_HUMAN,sp Q9CWZ7 SNAG_MOUSE,trans B4DFC9 B4DFC9_HUMAN,trans D2HHS6 D2HHS6_ALME,trans D3Z4B2 D3Z4B2_MOUSE,trans D3ZU08 D3ZU08_RAT,trans D4A0E2 D4A0E2_RAT,trans E2R561 E2R561_CAF6Z0B6 F6Z0B6_MACR | tIAQ<br>VLV<br>HLH<br>R | 74% | 31.7 | 49.34463 | Ref | 0.032 | -0.53 | -0.12 | -0.35 | -0.23 | -0    | 0.033 | 319 | 260 | 191 | 284 | 268 | 253 | 310 | 316 | 398.5 | 1590 | 4 | 0.0068 | 4.287 |

|                                                                               |                                                                                                                                                                                                                            |             |     |      |          |     |       |       |       |       |       |       |       |       |       |       |       |       |       |       |       |       |        |   |        |       |
|-------------------------------------------------------------------------------|----------------------------------------------------------------------------------------------------------------------------------------------------------------------------------------------------------------------------|-------------|-----|------|----------|-----|-------|-------|-------|-------|-------|-------|-------|-------|-------|-------|-------|-------|-------|-------|-------|-------|--------|---|--------|-------|
| Histidine triad nucleotide-binding protein 1 OS=Bos taurus GN=HINT1 PE=1 SV=2 | 8 HINT1_BOVIN,sp P62959 HINT1_RA T,sp P70349 HINT1_MOUSE,sp P80912 HINT1_RABIT,tr A1XEA3 A1XEA3_BOVIN,tr A1XEC3 A1XEC3_BOVIN,tr A1XEC4 A1XEC4_BOVIN,tr B1AZK3 B1AZK3_MOUSE,tr D2HVN8 D2HVN8_AILME,tr D4A269 D4A269_RAT,trl | CAA<br>DLGL | 77% | 36.5 | 52.06178 | Ref | -0.12 | -0.42 | -0.14 | -0.36 | -0.12 | -0.57 | -0.18 | 19200 | 15400 | 13600 | 18500 | 17500 | 18100 | 13800 | 17900 | 722.9 | 1443.8 | 2 | 0.0036 | 2.52  |
| Histidine triad nucleotide-binding protein 1 OS=Bos taurus GN=HINT1 PE=1 SV=2 | 8 HINT1_BOVIN,sp P62959 HINT1_RA T,sp P70349 HINT1_MOUSE,sp P80912 HINT1_RABIT,tr A1XEA3 A1XEA3_BOVIN,tr A1XEC3 A1XEC3_BOVIN,tr A1XEC4 A1XEC4_BOVIN,tr B1AZK3 B1AZK3_MOUSE,tr D2HVN8 D2HVN8_AILME,tr D4A269 D4A269_RAT,trl | CAA<br>DLGL | 81% | 38.8 | 52.09687 | Ref | -0.23 | -0.33 | -0.12 | -0.24 | -0.21 | -0.62 | -0.17 | 26400 | 19500 | 19700 | 25500 | 25800 | 23200 | 18200 | 24600 | 482.3 | 1443.8 | 3 | 0.0028 | 1.964 |

|                                                                          |                                                                                                                                                                                                                                  |                   |     |      |          |     |      |      |       |        |       |      |       |       |       |       |       |       |       |       |       |       |        |   |        |       |
|--------------------------------------------------------------------------|----------------------------------------------------------------------------------------------------------------------------------------------------------------------------------------------------------------------------------|-------------------|-----|------|----------|-----|------|------|-------|--------|-------|------|-------|-------|-------|-------|-------|-------|-------|-------|-------|-------|--------|---|--------|-------|
| Casein kinase II subunit beta<br>OS=Bos taurus<br>GN=CSNK2B PE=1<br>SV=1 | 8 CSK2B_BOVIN,sp P67870 CSK2B_HUMAN,sp P67871 CSK2B_MOUSE,sp P67872 CSK2B_PIG,sp P67873 CSK2B_RABBIT,sp P67874 CSK2B_RAT, tr BOUXA9 BOUXA9_HUMAN, tr B7U170 B7U170_SHEEP, tr B9TSQ8 B9TSQ8_PIG, tr D2I4A3 D2I4A3_AILME, tr E2RP7 | rPAN<br>QFV<br>PR | 79% | 37.6 | 51.63647 | Ref | 0.27 | 0.52 | -0.04 | -0.073 | 0.11  | 0.13 | -0.03 | 16700 | 17400 | 22400 | 17200 | 18400 | 18200 | 19300 | 17100 | 463.6 | 1387.8 | 3 | 0.0107 | 7.713 |
| Casein kinase II subunit beta<br>OS=Bos taurus<br>GN=CSNK2B PE=1<br>SV=1 | 8 CSK2B_BOVIN,sp P67870 CSK2B_HUMAN,sp P67871 CSK2B_MOUSE,sp P67872 CSK2B_PIG,sp P67873 CSK2B_RABBIT,sp P67874 CSK2B_RAT, tr BOUXA9 BOUXA9_HUMAN, tr B7U170 B7U170_SHEEP, tr B9TSQ8 B9TSQ8_PIG, tr D2I4A3 D2I4A3_AILME, tr E2RP7 | rPAN<br>QFV<br>PR | 77% | 37   | 51.63113 | Ref | 0.37 | 0.42 | 0.089 | -0.11  | 0.046 | 0.1  | -0.02 | 23000 | 25900 | 29100 | 26000 | 25000 | 24300 | 26400 | 24100 | 463.6 | 1387.8 | 3 | 0.01   | 7.173 |

|                                                                            |                                                                                                                                                                                                                       |                  |     |      |          |     |       |       |      |       |      |       |       |       |       |       |       |       |       |       |       |       |        |   |        |       |
|----------------------------------------------------------------------------|-----------------------------------------------------------------------------------------------------------------------------------------------------------------------------------------------------------------------|------------------|-----|------|----------|-----|-------|-------|------|-------|------|-------|-------|-------|-------|-------|-------|-------|-------|-------|-------|-------|--------|---|--------|-------|
| ATPase inhibitor, mitochondrial<br>OS=Bos taurus<br>GN=ATPIF1 PE=1<br>SV=2 | sp P01096 ATIF1_BOVIN,sp Q29307 ATIF1_PIG                                                                                                                                                                             | dAG<br>GAF<br>Gk | 78% | 35.9 | 51.20182 | Ref | -0.51 | 0.8   | 0.48 | 0.65  | 1.2  | 0.26  | 1     | 30500 | 19000 | 50800 | 45600 | 56700 | 71200 | 39600 | 65700 | 665.9 | 1329.7 | 2 | 0.0216 | 16.22 |
| ATPase inhibitor, mitochondrial<br>OS=Bos taurus<br>GN=ATPIF1 PE=1<br>SV=2 | sp P01096 ATIF1_BOVIN,sp Q29307 ATIF1_PIG                                                                                                                                                                             | dAG<br>GAF<br>Gk | 51% | 30.8 | 51.21668 | Ref | 0.26  | 0.8   | 0.51 | 0.82  | 0.9  | 0.29  | 0.68  | 5090  | 5230  | 8240  | 7560  | 10300 | 9500  | 6530  | 8460  | 444.3 | 1329.7 | 3 | 0.0197 | 14.79 |
| ADP-ribosylation factor 3 OS=Homo sapiens GN=ARF3 PE=1 SV=2                | 4 ARF3_HUMAN,sp P61205 ARF3_MOUSE,sp P61206 ARF3_RAT,sp P84077 ARF1_HUMAN,sp P84078 ARF1_MOUSE,sp P84079 ARF1_RAT,sp P84080 ARF1_BOVIN,sp P84081 ARF2_BOVIN,sp P84082 ARF2_RAT,sp Q4R5P2 ARF1_MACFA,sp Q5E916 ARF3_BO | IGLH<br>SLR      | 75% | 34.9 | 50.29246 | Ref | 0.17  | -0.24 | 0.37 | -0.27 | 0.27 | -0.44 | -0.41 | 6180  | 6230  | 5070  | 8710  | 6160  | 7830  | 4980  | 5070  | 367.2 | 1098.7 | 3 | 0.0035 | 3.201 |

|                                                                            |                                                                                                                                                                                                                               |                 |            |             |                 |            |               |              |              |              |             |              |              |              |              |              |              |              |              |              |              |              |               |          |               |              |
|----------------------------------------------------------------------------|-------------------------------------------------------------------------------------------------------------------------------------------------------------------------------------------------------------------------------|-----------------|------------|-------------|-----------------|------------|---------------|--------------|--------------|--------------|-------------|--------------|--------------|--------------|--------------|--------------|--------------|--------------|--------------|--------------|--------------|--------------|---------------|----------|---------------|--------------|
| <p>ADP-ribosylation factor 3 OS=Homo sapiens GN=ARF3 PE=1 SV=2</p>         | <p>4 ARF3_HUMAN,sp P61205 ARF3_MOUSE,sp P61206 ARF3_RAT,sp P84077 ARF1_HUMAN,sp P84078 ARF1_MOUSE,sp P84079 ARF1_RAT,sp P84080 ARF1_BOVIN,sp P84081 ARF2_BOVIN,sp P84082 ARF2_RAT,sp Q4R5P2 ARF1_MACACA,sp Q5E9I6 ARF3_BO</p> | <p>IGLH SLR</p> | <p>66%</p> | <p>33.3</p> | <p>50.96722</p> | <p>Ref</p> | <p>-0.026</p> | <p>-0.27</p> | <p>0.32</p>  | <p>-0.38</p> | <p>0.3</p>  | <p>-0.32</p> | <p>-0.21</p> | <p>32000</p> | <p>26500</p> | <p>24200</p> | <p>41000</p> | <p>27800</p> | <p>38800</p> | <p>26500</p> | <p>28300</p> | <p>367.2</p> | <p>1098.7</p> | <p>3</p> | <p>0.0066</p> | <p>5.957</p> |
| <p>ATP-dependent RNA helicase DDX3X OS=Homo sapiens GN=DDX3X PE=1 SV=3</p> | <p>1 DDX3X_HUMAN,sp O15523 DDX3Y_HUMAN,sp P16381 DDX3L_MOUSE,sp Q5RF43 DDX3Y_PONAB,sp Q62095 DDX3Y_MOUSE,sp Q62167 DDX3X_MOUSE,sp Q6GVM6 DDX3Y_PANTR,tr B4DK29 B4DK29_HUMAN,tr B4DLU5 B4DLU5_HUMAN,tr B4DXX7 B4</p>           | <p>hAIPI Ik</p> | <p>70%</p> | <p>28.9</p> | <p>45.76986</p> | <p>Ref</p> | <p>-0.12</p>  | <p>-0.1</p>  | <p>-0.12</p> | <p>-0.29</p> | <p>-0.3</p> | <p>-0.29</p> | <p>-0.27</p> | <p>23800</p> | <p>18600</p> | <p>20600</p> | <p>22800</p> | <p>22300</p> | <p>19300</p> | <p>20300</p> | <p>20500</p> | <p>467.3</p> | <p>1398.9</p> | <p>3</p> | <p>0.0231</p> | <p>16.49</p> |

|                                                                                                                      |                                                                                                                                                                                                                     |          |     |      |          |     |        |       |       |       |       |       |       |       |       |       |       |       |       |       |       |       |        |   |        |       |
|----------------------------------------------------------------------------------------------------------------------|---------------------------------------------------------------------------------------------------------------------------------------------------------------------------------------------------------------------|----------|-----|------|----------|-----|--------|-------|-------|-------|-------|-------|-------|-------|-------|-------|-------|-------|-------|-------|-------|-------|--------|---|--------|-------|
| ATP-dependent RNA helicase DDX3X OS=Homo sapiens GN=DDX3X PE=1 SV=3                                                  | 1 DDX3X_HUMAN,sp O15523 DDX3Y_HUMAN,sp P16381 DDX3L_MOUSE,sp Q5RF43 DDX3Y_PONAB,sp Q62095 DDX3Y_MOUSE,sp Q62167 DDX3X_MOUSE,sp Q6GVM6 DDX3Y_PANTR,tr B4DK29 B4DK29_HUMAN,tr B4DLU5 B4DLU5_HUMAN,tr B4DXX7 B4        | hAIP1    | 75% | 28.5 | 43.90263 | Ref | -0.013 | -0.24 | -0.24 | -0.18 | -0.17 | -0.18 | -0.39 | 24100 | 21200 | 19600 | 22000 | 25300 | 22300 | 23100 | 19800 | 467.3 | 1398.9 | 3 | 0.0045 | 3.228 |
| Serine/threonine-protein phosphatase 2A 56 kDa regulatory subunit gamma isoform OS=Homo sapiens GN=PPP2R5C PE=1 SV=3 | 2 2A5G_HUMAN,sp Q14738 2A5D_HUMAN,sp Q28651 2A5G_RABIT,sp Q28653 2A5D_RABIT,sp Q60996 2A5G_MOUSE,tr A4FV55 A4FV55_BOVIN,tr A5GFQ9 A5GFQ9_PIG,tr A8K6Y2 A8K6Y2_HUMAN,tr B4DSD7 B4DSD7_HUMAN,tr B4DYJ8 B4DYJ8_HUMAN,t | vLLP LHK | 74% | 24.8 | 40.43166 | Ref | -0.066 | -0.05 | -0.39 | -0.45 | -0.49 | -0.2  | -0.73 | 3390  | 3100  | 3410  | 3000  | 3200  | 2700  | 3450  | 2380  | 476.7 | 1426.9 | 3 | 0.0032 | 2.261 |

|                                                                                                                             |                                                                                                                                                                                                                                                                       |                       |            |           |                 |            |              |              |              |              |              |              |              |              |              |              |              |              |              |              |              |              |               |          |               |              |
|-----------------------------------------------------------------------------------------------------------------------------|-----------------------------------------------------------------------------------------------------------------------------------------------------------------------------------------------------------------------------------------------------------------------|-----------------------|------------|-----------|-----------------|------------|--------------|--------------|--------------|--------------|--------------|--------------|--------------|--------------|--------------|--------------|--------------|--------------|--------------|--------------|--------------|--------------|---------------|----------|---------------|--------------|
| <p>Serine/threonine-protein phosphatase 2A 56 kDa regulatory subunit gamma isoform OS=Homo sapiens GN=PPP2R5C PE=1 SV=3</p> | <p>2 2A5G_HUMAN,sp Q14738 2A5D_HUMAN,sp Q28651 2A5G_RA BIT,sp Q28653 2A5D_RABIT,sp Q60996 2A5G_MOUSE,transcript A4FV55 A4FV55_BOVIN,transcript A5GFQ9 A5GFQ9_PIG,transcript A8K6Y2 A8K6Y2_HUMAN,transcript B4DSD7 B4DSD7_HUMAN,transcript B4DYJ8 B4DYJ8_HUMAN,t</p>   | <p>VLLP LHK</p>       | <p>51%</p> | <p>20</p> | <p>40.43166</p> | <p>Ref</p> | <p>-0.41</p> | <p>-0.12</p> | <p>-0.53</p> | <p>-0.22</p> | <p>-0.6</p>  | <p>-0.29</p> | <p>-0.49</p> | <p>4860</p>  | <p>2910</p>  | <p>3870</p>  | <p>3260</p>  | <p>4440</p>  | <p>2990</p>  | <p>3870</p>  | <p>3360</p>  | <p>476.7</p> | <p>1426.9</p> | <p>3</p> | <p>0.0037</p> | <p>2.576</p> |
| <p>60S ribosomal protein L27a OS=Homo sapiens GN=RPL27A PE=1 SV=2</p>                                                       | <p>6 RL27A_HUMAN,sp Q4R723 RL27A_MACFA,sp Q56K03 RL27A_BOVIN,sp Q5R1X0 RL27A_PANTR,sp Q5REY2 RL27A_PONAB,transcript D2GX71 D2GX71_AILME,transcript D2H317 D2H317_AILME,transcript D2HDG8 D2HDG8_AILME,transcript D3YZN6 D3YZN6_MOUSE,transcript D3ZG03 D3ZG03_VRR</p> | <p>tGAA PIIID VVR</p> | <p>57%</p> | <p>31</p> | <p>50.77081</p> | <p>Ref</p> | <p>0.086</p> | <p>-0.17</p> | <p>0.2</p>   | <p>-0.24</p> | <p>0.056</p> | <p>-0.18</p> | <p>0.14</p>  | <p>11100</p> | <p>11600</p> | <p>10600</p> | <p>15300</p> | <p>12500</p> | <p>13300</p> | <p>11800</p> | <p>14600</p> | <p>708.4</p> | <p>1414.8</p> | <p>2</p> | <p>0.0156</p> | <p>11.02</p> |

|                                                                                 |                                                                                                                                                                                                                       |              |     |      |          |     |        |       |       |        |       |       |       |       |        |       |        |        |       |       |        |       |        |   |        |       |
|---------------------------------------------------------------------------------|-----------------------------------------------------------------------------------------------------------------------------------------------------------------------------------------------------------------------|--------------|-----|------|----------|-----|--------|-------|-------|--------|-------|-------|-------|-------|--------|-------|--------|--------|-------|-------|--------|-------|--------|---|--------|-------|
| 60S ribosomal protein L27a<br>OS=Homo sapiens<br>GN=RPL27A PE=1<br>SV=2         | 6 RL27A_HUMAN,sp Q4R723 RL27A_MACFA,sp Q56K03 RL27A_BOVIN,sp Q5R1X0 RL27A_PANTR,sp Q5REY2 RL27A_PONAB,tr D2GX71 D2GX71_AILME,tr D2H317 D2H317_AILME,tr D2HDG8 D2HDG8_AILME,tr D3YZN6 D3YZN6_MOUN6,SE,tr D3ZG03 D3ZVVR | tGAA<br>PIID | 73% | 34.5 | 50.3585  | Ref | 0.3    | 0.005 | 0.098 | -0.23  | -0.21 | -0.23 | -0.21 | 2850  | 2730   | 2420  | 2890   | 2540   | 2250  | 2320  | 2320   | 472.6 | 1414.8 | 3 | 0.0095 | 6.698 |
| Uncharacterized protein C1orf226<br>OS=Homo sapiens<br>GN=C1orf226 PE=1<br>SV=1 | 1L170 CA226_HUMAN,REV,sp A4IFJ0 CA226_BOVIN,REV,sp Q5REP3 LYSM4_PONAB,REV,sp Q5XG99 LYSM4_HUMAN,REV,sp Q8CC84 LYSM4_MOUSE,REV,sp Q9JJ26 MEFV_MOUSE,REV,tr A2VDV4 A2VDV4_BOVIN,REV,tr C9JB9 C9JB9_HUMAN,REV,tr nK      | eLFD         | 71% | 32.9 | 49.95007 | Ref | -0.024 | 0.31  | 0.029 | -0.067 | -0.09 | 0.25  | -0.6  | 2E+05 | 171000 | 2E+05 | 216000 | 223000 | 2E+05 | 3E+05 | 140000 | 535.8 | 1069.6 | 2 | 0.0034 | 3.215 |



|                                                                        |                                                                                                                                                                                                                 |            |     |      |          |     |        |      |       |      |       |       |       |       |       |       |       |       |       |       |       |       |        |   |        |       |
|------------------------------------------------------------------------|-----------------------------------------------------------------------------------------------------------------------------------------------------------------------------------------------------------------|------------|-----|------|----------|-----|--------|------|-------|------|-------|-------|-------|-------|-------|-------|-------|-------|-------|-------|-------|-------|--------|---|--------|-------|
| Uncharacterized protein C1orf226 OS=Homo sapiens GN=C1orf226 PE=1 SV=1 | 1L170 CA226_HUMAN,REV_sp A4IFJ0 CA226_BOVIN,REV_sp Q5REP3 LYSM4_PONAB,REV_sp Q5XG99 LYSM4_HUMAN,REV_sp Q8CC84 LYSM4_MOUSE,REV_sp Q9JJ26 MEFV_MOUSE,REV_tr A2VDV4 A2VDV4_BOVIN,REV_tr C9J1B9 C9J1B9_HUMAN,REV_tr | eLFD<br>nK | 58% | 30.3 | 49.88091 | Ref | -0.034 | 0.25 | -0.04 | 0.04 | -0.04 | 0.055 | -0.18 | 19800 | 17500 | 23100 | 21200 | 24700 | 20400 | 22700 | 19100 | 535.8 | 1069.6 | 2 | 0.002  | 1.851 |
| Uncharacterized protein OS=Bos taurus GN=Bt.45180 PE=4 SV=1            | BC49 E1BC49_BOVIN,REV_tr F7BJ67 F7BJ67_ORNAN,sp O14561 ACPM_HUMAN,sp P52505 ACPM_BOVIN,sp Q0MQC1 ACPM_PONPY,sp Q0MQC2 ACPM_GORG,sp Q0MQC3 ACPM_PANTR,sp Q9CR21 ACPM_MOUSE,rev_tr A4UCS3 A4UCS3_HUMAN,rev_tr DOG | vLYV<br>ik | 64% | 25.8 | 43.85731 | Ref | -0.25  | 0.59 | 0.69  | 0.41 | 0.92  | 0.36  | 0.94  | 4160  | 3020  | 5860  | 7030  | 6390  | 7940  | 5650  | 8350  | 448.3 | 1341.9 | 3 | 0.0217 | 16.13 |

|                                                                         |                                                                                                                                                                                                                    |        |     |      |          |     |       |       |       |       |      |       |      |      |      |      |       |       |       |      |       |       |        |   |        |       |
|-------------------------------------------------------------------------|--------------------------------------------------------------------------------------------------------------------------------------------------------------------------------------------------------------------|--------|-----|------|----------|-----|-------|-------|-------|-------|------|-------|------|------|------|------|-------|-------|-------|------|-------|-------|--------|---|--------|-------|
| Uncharacterized protein OS=Bos taurus GN=Bt.45180 PE=4 SV=1             | BC49 E1B C49_BOVIN,REV_tr F7BJ67 F7BJ67_OR NAN,sp O14561 ACPM_HUMAN,sp P52505 ACPM_BOVIN,sp Q0MQC1 ACPM_PONPY,sp Q0MQC2 ACPM_GORG O,sp Q0MQC3 ACPM_PANT R,sp Q9CR21 ACPM_MOUSE,sp A4UCS3 A4UCS3_HUMAN,sp D0G       | vLYVik | 71% | 26   | 42.51833 | Ref | -0.38 | 0.62  | 0.74  | 0.48  | 1    | 0.32  | 0.82 | 6500 | 4360 | 9510 | 11600 | 10600 | 13400 | 8690 | 12200 | 448.3 | 1341.9 | 3 | 0.0092 | 6.859 |
| Uncharacterized protein OS=Ornithorhynchus anatinus GN=ABCB11 PE=3 SV=1 | WP30 F6 WP30_OR NAN,REV_tr F7F2T7 F7F2T7_MONDO,sp Q8VDM6 HNRL1_MOUSE,sp Q9BUJ2 HNRL1_HUMAN,sp A4FUC2 A4FUC2_BOVIN,sp A8K3W4 A8K3W4_HUMAN,sp A8K5K0 A8K5K0_HUMAN,sp A8K6U7 A8K6U7_HUMAN,sp B3KM6 B3KM6_HUMAN,sp D0G | TnEEGk | 60% | 27.5 | 46.8302  | Ref | -0.51 | 0.003 | -0.13 | -0.21 | 0.24 | -0.58 | 0.16 | 821  | 454  | 701  | 719   | 748   | 895   | 527  | 875   | 491.7 | 981.48 | 2 | 0.0098 | 9.986 |

|                                                                                 |                                                                                                                                                                                                                                                                                                                      |                    |     |      |          |     |       |       |       |       |       |       |       |      |      |     |      |      |      |      |      |       |        |   |        |       |
|---------------------------------------------------------------------------------|----------------------------------------------------------------------------------------------------------------------------------------------------------------------------------------------------------------------------------------------------------------------------------------------------------------------|--------------------|-----|------|----------|-----|-------|-------|-------|-------|-------|-------|-------|------|------|-----|------|------|------|------|------|-------|--------|---|--------|-------|
| Uncharacterized protein<br>OS=Ornithorhynchus anatinus<br>GN=ABC11 PE=3<br>SV=1 | WP30 F6<br>WP30_OR<br>NAN,REV_<br>tr F7F2T7<br> F7F2T7_<br>MONDO,s<br>p Q8VDM<br>6 HNRL1_<br>MOUSE,s<br>p Q9BUJ2<br> HNRL1_<br>HUMAN,t<br>r A4FUC2<br> A4FUC2_<br>BOVIN,tr <br>A8K3W4 <br>A8K3W4_<br>HUMAN,t<br>r A8K5K0<br> A8K5K0_<br>HUMAN,t<br>r A8K6U7<br> A8K6U7_<br>HUMAN,t<br>r B3KM6<br> B3KM6<br>0_HUMA    | TnEE<br>Gk         | 71% | 29.9 | 47.03936 | Ref | -0.38 | 0.019 | -0.07 | -0.18 | 0.28  | -0.51 | 0.19  | 794  | 593  | 849 | 895  | 914  | 1100 | 665  | 1070 | 491.7 | 981.48 | 2 | 0.0079 | 8.052 |
| Ubiquitin thioesterase OTUB1<br>OS=Rattus norvegicus<br>GN=Otub1 PE=1<br>SV=1   | 6 OTUB1<br>_RAT,sp <br>Q7TQI3 O<br>TUB1_MO<br>USE,sp Q<br>96FW1 O<br>TUB1_HU<br>MAN,tr B<br>3KUV5 B<br>3KUV5_H<br>UMAN,tr <br>B4DPD5 <br>B4DPD5_<br>HUMAN,t<br>r B4E053<br> B4E053_<br>HUMAN,t<br>r C5H0C6<br> C5H0C6_<br>PIG,tr D2<br>H4U8 D2<br>H4U8_AIL<br>ME,tr D3<br>YWF6 D3<br>YWF6_M<br>OUSE,tr F<br>1PIA2 F1 | fFEH<br>FIEG<br>GR | 71% | 34.9 | 51.54406 | Ref | 0.053 | -0.28 | 0.14  | -0.39 | -0.51 | -0.41 | -0.11 | 1280 | 1150 | 991 | 1490 | 1130 | 912  | 1020 | 1250 | 514.9 | 1541.8 | 3 | 0.0092 | 5.934 |

|                                                                                     |                                                                                                                                                                                                                                                                                                                      |                    |     |      |          |     |       |       |       |       |       |       |       |      |      |      |      |      |      |      |      |       |        |   |        |       |
|-------------------------------------------------------------------------------------|----------------------------------------------------------------------------------------------------------------------------------------------------------------------------------------------------------------------------------------------------------------------------------------------------------------------|--------------------|-----|------|----------|-----|-------|-------|-------|-------|-------|-------|-------|------|------|------|------|------|------|------|------|-------|--------|---|--------|-------|
| Ubiquitin<br>thioesterase OTUB1<br>OS=Rattus<br>norvegicus<br>GN=Otub1 PE=1<br>SV=1 | 6 OTUB1<br>_RAT,sp <br>Q7TQI3 O<br>TUB1_MO<br>USE,sp Q<br>96FW1 O<br>TUB1_HU<br>MAN,tr B<br>3KUV5 B<br>3KUV5_H<br>UMAN,tr <br>B4DPD5 <br>B4DPD5_<br>HUMAN,t<br>r B4E053<br> B4E053_<br>HUMAN,t<br>r C5H0C6<br> C5H0C6_<br>PIG,tr D2<br>H4U8 D2<br>H4U8_AIL<br>ME,tr D3<br>YWF6 D3<br>YWF6_M<br>OUSE,tr F<br>1PIA2 F1 | fFEH<br>FIEG<br>GR | 62% | 32.9 | 51.55901 | Ref | 0.026 | -0.18 | -0.09 | -0.56 | -0.35 | -0.38 | 0.033 | 1830 | 1610 | 1520 | 1810 | 1440 | 1460 | 1490 | 1970 | 514.9 | 1541.8 | 3 | 0.0079 | 5.098 |
| Uncharacterized<br>protein OS=Equus<br>caballus<br>GN=CCDC15 PE=4<br>SV=1           | REV_tr F6<br>YK38 F6Y<br>K38_HOR<br>SE                                                                                                                                                                                                                                                                               | APqI<br>Aqk        | 67% | 31.8 | 49.72175 | Ref | 0.61  | 0.74  | 0.44  | 0.65  | 0.68  | 1.3   | 0.7   | 1160 | 1420 | 1690 | 1530 | 1960 | 1740 | 2850 | 1840 | 531.3 | 1060.6 | 2 | 0.0124 | 11.7  |
| Uncharacterized<br>protein OS=Equus<br>caballus<br>GN=CCDC15 PE=4<br>SV=1           | REV_tr F6<br>YK38 F6Y<br>K38_HOR<br>SE                                                                                                                                                                                                                                                                               | APqI<br>Aqk        | 68% | 31.7 | 49.47914 | Ref | 0.62  | 0.71  | 0.6   | 0.55  | 0.53  | 1.6   | 0.43  | 1820 | 2660 | 3070 | 3190 | 3400 | 2920 | 6520 | 2840 | 531.3 | 1060.6 | 2 | 0.0096 | 9.063 |

|                                                                                    |                                                                                                                                                                                                                                        |                      |            |             |                 |            |              |              |              |              |             |              |              |             |             |             |             |             |             |             |             |              |               |          |               |              |
|------------------------------------------------------------------------------------|----------------------------------------------------------------------------------------------------------------------------------------------------------------------------------------------------------------------------------------|----------------------|------------|-------------|-----------------|------------|--------------|--------------|--------------|--------------|-------------|--------------|--------------|-------------|-------------|-------------|-------------|-------------|-------------|-------------|-------------|--------------|---------------|----------|---------------|--------------|
| <p>Serine/arginine-rich splicing factor 11 OS=Homo sapiens GN=SRSF11 PE=1 SV=1</p> | <p>9 SRS11_HUMAN, tr B4DTC1 B4DTC1_HUMAN, tr B4DWT1 B4DWT1_HUMAN, tr D2HTF1 D2HTF1_AILME, tr D3Z4B0 D3Z4B0_MOUSE, tr D3ZBT0 D3ZBT0_RAT, tr D3ZN26 D3ZN26_RAT, tr D4A4E2 D4A4E2_RAT, tr D6RE22 D6RE22_MOUSE, tr E9Q6E5 E9Q6E5_MOUSE</p> | <p>tLFG<br/>FLGK</p> | <p>58%</p> | <p>30.3</p> | <p>49.51585</p> | <p>Ref</p> | <p>-0.31</p> | <p>-0.28</p> | <p>0.27</p>  | <p>-0.24</p> | <p>0.27</p> | <p>-0.57</p> | <p>0.5</p>   | <p>4630</p> | <p>3270</p> | <p>3640</p> | <p>5950</p> | <p>4620</p> | <p>5760</p> | <p>3350</p> | <p>6970</p> | <p>497.6</p> | <p>1489.9</p> | <p>3</p> | <p>0.0039</p> | <p>2.633</p> |
| <p>Serine/arginine-rich splicing factor 11 OS=Homo sapiens GN=SRSF11 PE=1 SV=1</p> | <p>9 SRS11_HUMAN, tr B4DTC1 B4DTC1_HUMAN, tr B4DWT1 B4DWT1_HUMAN, tr D2HTF1 D2HTF1_AILME, tr D3Z4B0 D3Z4B0_MOUSE, tr D3ZBT0 D3ZBT0_RAT, tr D3ZN26 D3ZN26_RAT, tr D4A4E2 D4A4E2_RAT, tr D6RE22 D6RE22_MOUSE, tr E9Q6E5 E9Q6E5_MOUSE</p> | <p>tLFG<br/>FLGK</p> | <p>66%</p> | <p>31</p>   | <p>49.16722</p> | <p>Ref</p> | <p>0.22</p>  | <p>-0.17</p> | <p>0.049</p> | <p>-0.11</p> | <p>0.21</p> | <p>-0.4</p>  | <p>0.025</p> | <p>7060</p> | <p>7090</p> | <p>5870</p> | <p>7650</p> | <p>7570</p> | <p>8230</p> | <p>5640</p> | <p>7510</p> | <p>746</p>   | <p>1489.9</p> | <p>2</p> | <p>#####</p>  | <p>0.021</p> |

|                                                      |                                                                                                                                                                                                                                                                                                                           |                   |     |      |          |     |       |       |      |        |       |      |      |       |       |       |       |       |       |       |       |       |        |   |        |       |
|------------------------------------------------------|---------------------------------------------------------------------------------------------------------------------------------------------------------------------------------------------------------------------------------------------------------------------------------------------------------------------------|-------------------|-----|------|----------|-----|-------|-------|------|--------|-------|------|------|-------|-------|-------|-------|-------|-------|-------|-------|-------|--------|---|--------|-------|
| Cholecystokinin<br>OS=Sus scrofa<br>GN=CCK PE=1 SV=1 | 6 CCKN_P<br>IG,sp P06<br>307 CCKN<br>_HUMAN,<br>sp P2336<br>2 CCKN_<br>MACFA,sp<br> Q9TS44 <br>CCKN_CA<br>NFA,tr B7<br>Z6Q9 B7Z<br>6Q9_HU<br>MAN,tr D<br>2HN41 D<br>2HN41_AI<br>LME,tr F6<br>QGZ9 F6<br>QGZ9_CA<br>LJA,tr F6<br>QMJ5 F6<br>QMJ5_M<br>ACMU,tr <br>F7BAG1 F<br>7BAG1_H<br>ORSE,tr F<br>7GS85 F7<br>GS85_CAL | aHLG<br>ALLA<br>R | 62% | 33.1 | 51.61814 | Ref | 0.16  | 0.16  | 0.37 | -0.041 | 0.086 | 0.18 | 0.33 | 8670  | 9040  | 9800  | 12700 | 10500 | 10000 | 11200 | 12400 | 409.3 | 1224.8 | 3 | 0.0076 | 6.222 |
| Cholecystokinin<br>OS=Sus scrofa<br>GN=CCK PE=1 SV=1 | 6 CCKN_P<br>IG,sp P06<br>307 CCKN<br>_HUMAN,<br>sp P2336<br>2 CCKN_<br>MACFA,sp<br> Q9TS44 <br>CCKN_CA<br>NFA,tr B7<br>Z6Q9 B7Z<br>6Q9_HU<br>MAN,tr D<br>2HN41 D<br>2HN41_AI<br>LME,tr F6<br>QGZ9 F6<br>QGZ9_CA<br>LJA,tr F6<br>QMJ5 F6<br>QMJ5_M<br>ACMU,tr <br>F7BAG1 F<br>7BAG1_H<br>ORSE,tr F<br>7GS85 F7<br>GS85_CAL | aHLG<br>ALLA<br>R | 64% | 33.5 | 51.61392 | Ref | 0.052 | 0.063 | 0.34 | -0.1   | 0.062 | 0.1  | 0.51 | 25600 | 21600 | 23600 | 32200 | 26100 | 25500 | 27400 | 36200 | 409.3 | 1224.8 | 3 | 0.0096 | 7.861 |

|                                                            |                                                                                                                                                                                                                          |                   |     |      |          |     |       |       |       |       |       |       |       |      |      |      |      |      |      |      |      |     |      |   |        |       |
|------------------------------------------------------------|--------------------------------------------------------------------------------------------------------------------------------------------------------------------------------------------------------------------------|-------------------|-----|------|----------|-----|-------|-------|-------|-------|-------|-------|-------|------|------|------|------|------|------|------|------|-----|------|---|--------|-------|
| Ras suppressor protein 1 OS=Mus musculus GN=Rsu1 PE=2 SV=3 | 0 RSU1_MOUSE,sp Q15404 RSU1_HUMAN,sp Q5E9C0 RSU1_BOVIN, tr A2AUR7 A2AUR7_MOUSE, tr A88KA46 A8KA46_HUMAN, tr B0YJ73 B0YJ73_HUMAN, tr C77BDX2 C7BDX2_SHEEP, tr D2H9Y0 D2H9Y0_AILME, tr D3ZCX0 D3ZCX0_RAT, tr D4A8F2 D4A8F2 | eIGE<br>LTQL<br>k | 55% | 31.3 | 51.22439 | Ref | -0.45 | -0.17 | -0.26 | -0.23 | -0.34 | -0.18 | -0.46 | 6650 | 4540 | 5950 | 6270 | 7080 | 5740 | 6700 | 5470 | 547 | 1638 | 3 | 0.0039 | 2.37  |
| Ras suppressor protein 1 OS=Mus musculus GN=Rsu1 PE=2 SV=3 | 0 RSU1_MOUSE,sp Q15404 RSU1_HUMAN,sp Q5E9C0 RSU1_BOVIN, tr A2AUR7 A2AUR7_MOUSE, tr A88KA46 A8KA46_HUMAN, tr B0YJ73 B0YJ73_HUMAN, tr C77BDX2 C7BDX2_SHEEP, tr D2H9Y0 D2H9Y0_AILME, tr D3ZCX0 D3ZCX0_RAT, tr D4A8F2 D4A8F2 | eIGE<br>LTQL<br>k | 63% | 32.8 | 51.2394  | Ref | -0.2  | -0.33 | -0.45 | -0.37 | -0.27 | -0.29 | -0.4  | 5350 | 3800 | 3770 | 3900 | 4530 | 4250 | 4380 | 4010 | 547 | 1638 | 3 | 0.0033 | 2.041 |

|                                                                                |                                                                                                                                                                                                        |                                  |     |      |          |     |                                             |                                                     |                                                |                                                 |                                                |                                                |                                                 |                       |                                             |                                                     |                                                |                                             |                                                |                                                |                                             |       |        |   |        |       |
|--------------------------------------------------------------------------------|--------------------------------------------------------------------------------------------------------------------------------------------------------------------------------------------------------|----------------------------------|-----|------|----------|-----|---------------------------------------------|-----------------------------------------------------|------------------------------------------------|-------------------------------------------------|------------------------------------------------|------------------------------------------------|-------------------------------------------------|-----------------------|---------------------------------------------|-----------------------------------------------------|------------------------------------------------|---------------------------------------------|------------------------------------------------|------------------------------------------------|---------------------------------------------|-------|--------|---|--------|-------|
| Tax_Id=9606<br>Gene_Symbol=KRT9<br>Keratin, type I<br>cytoskeletal 9           | IPI:CON_0<br>0019359.<br>3 SWISS-<br>PROT:P35<br>527,sp P3<br>5527 K1C<br>9_HUMA<br>N                                                                                                                  | sGG<br>GGG<br>GGL<br>GSG<br>GSIR | 95% | 59.9 | 51.46922 | Ref | -0.45                                       | 0.31                                                | 0.12                                           | -1.2                                            | -0.54                                          | 0.42                                           | -0.45                                           | 4480                  | 2850                                        | 5230                                                | 5160                                           | 2280                                        | 3150                                           | 6390                                           | 3470                                        | 768.9 | 1535.8 | 2 | 0.014  | 9.114 |
| Ataxin 3 variant ref<br>(Fragment)<br>OS=Homo sapiens<br>GN=ATXN3 PE=2<br>SV=1 | REV_tr D<br>3VVF6 D3<br>VVF6_HU<br>MAN,REV<br>_tr D3VV<br>M1 D3VV<br>M1_HUM<br>AN,REV_t<br>r D3VVP0<br> D3VVP0<br>_HUMAN,<br>REV_tr D<br>3VVS5 D3<br>VVS5_HU<br>MAN,tr E<br>1BGH0 E<br>1BGH0_B<br>OVIN | qQQ<br>QQQ<br>QQQ<br>QQQ<br>Qk   | 95% | 56.7 | 54.92362 | Ref | Refer<br>ence<br>Missing<br>(3.4620<br>218) | Refer<br>ence<br>Missin<br>g<br>(2.79<br>39718<br>) | Refer<br>ence<br>Missin<br>g<br>(2.980<br>702) | Refer<br>ence<br>Missin<br>g<br>(0.744<br>6217) | Refer<br>ence<br>Missin<br>g<br>(4.295<br>423) | Refer<br>ence<br>Missin<br>g<br>(2.622<br>807) | Refer<br>ence<br>Missin<br>g<br>(3.270<br>3993) | No<br>Values<br>(0.0) | Refer<br>ence<br>Missing<br>(3.462021<br>8) | Refer<br>ence<br>Missin<br>g<br>(2.79<br>39718<br>) | Refer<br>ence<br>Missin<br>g<br>(2.9807<br>02) | Refer<br>ence<br>Missing<br>(0.744621<br>7) | Refer<br>ence<br>Missin<br>g<br>(4.29<br>5423) | Refer<br>ence<br>Missin<br>g<br>(2.622<br>807) | Refer<br>ence<br>Missing<br>(3.270399<br>3) | 807.8 | 2420.2 | 3 | 0.0163 | 6.725 |
| Phosphatidate<br>cytidyltransferase<br>2 OS=Bos taurus<br>GN=CDS2 PE=1<br>SV=1 | sp A0JNC<br>1 CDS2_B<br>OVIN                                                                                                                                                                           | aDG<br>ETAS<br>DSES<br>R         | 95% | 63.5 | 47.03661 | Ref | -0.63                                       | -0.44                                               | -0.18                                          | -0.28                                           | -0.06                                          | -1                                             | -0.14                                           | 1740                  | 979                                         | 1210                                                | 1630                                           | 1680                                        | 1700                                           | 903                                            | 1670                                        | 764.9 | 1527.7 | 2 | 0.0078 | 5.09  |



|                                                                                              |                                                                                                                                                                                                                           |                                 |     |      |          |     |       |       |       |       |       |       |       |      |      |      |      |      |       |      |      |       |        |   |        |       |
|----------------------------------------------------------------------------------------------|---------------------------------------------------------------------------------------------------------------------------------------------------------------------------------------------------------------------------|---------------------------------|-----|------|----------|-----|-------|-------|-------|-------|-------|-------|-------|------|------|------|------|------|-------|------|------|-------|--------|---|--------|-------|
| Eukaryotic translation initiation factor 3 subunit J OS=Rattus norvegicus GN=Eif3j PE=2 SV=1 | 9 EIF3J_RAT,sp O75822 EIF3J_HUMAN,sp Q0VCU8 EIF3J_BOVIN,sp Q5R8D1 EIF3J_PONAB,sp Q66JS6 EIF3J_MOUSE,tr B4DUI3 B4DUI3_HUMAN,tr D2GW38 D2GW38_AILME,tr F1SN05 F1SN05_PIG,tr F1SN07 F1SN07_PIG,tr F5H425 F5H425_HUMAN,tr F6W | VLTP<br>EEQL<br>ADK             | 95% | 48.5 | 52.77779 | Ref | -0.23 | -0.19 | -0.08 | -0.11 | 0.2   | -0.52 | -0.05 | 8790 | 6500 | 7270 | 8810 | 9490 | 10300 | 6500 | 8980 | 926   | 1850   | 2 | 0.0139 | 7.51  |
| Eukaryotic initiation factor 4A-I OS=Pan troglodytes GN=EIF4A1 PE=2 SV=1                     | 4 IF4A1_PANTR,sp P29562 IF4A1_RABIT,sp P60842 IF4A1_HUMAN,sp P60843 IF4A1_MOUSE,sp Q3SZ54 IF4A1_BOVIN,sp Q4R8K5 IF4A1_MACFA,sp Q5R5F5 IF4A1_PONAB,tr A6M928 A6M928_PIG,tr A8K088 A8K088_HUMAN,tr A8K7F6 A8K7F6_HUMAN      | IQM<br>EAP<br>HIIV<br>GTP<br>GR | 95% | 60.4 | 53.49027 | Ref | 0.11  | -0.11 | -0    | -0.26 | -0.31 | 0.24  | -0.21 | 3940 | 3680 | 3450 | 4150 | 3850 | 3230  | 4940 | 3580 | 641.7 | 1922.1 | 3 | 0.0111 | 5.775 |

|                                                                                                   |                                                                                                                                                                                                                                |                              |       |     |      |          |     |        |       |       |       |       |       |       |      |      |      |      |      |      |      |      |       |        |   |        |       |
|---------------------------------------------------------------------------------------------------|--------------------------------------------------------------------------------------------------------------------------------------------------------------------------------------------------------------------------------|------------------------------|-------|-----|------|----------|-----|--------|-------|-------|-------|-------|-------|-------|------|------|------|------|------|------|------|------|-------|--------|---|--------|-------|
| Splicing factor 3A subunit 2 OS=Bos taurus GN=SF3A2 PE=2 SV=1                                     | 8 SF3A2_BOVIN,sp Q15428 SF3A2_HUMAN,sp Q62203 SF3A2_MOUSE,sp Q6AXT8 SF3A2_RAT, tr D2HTL8 D2HTL8_AILME, tr D3YW09 D3YW09_MOUSE, tr D3Z5A6 D3Z5A6_MOUSE, tr E2QXZ1 E2QXZ1_CANFA, tr F1S818 F1S818_PIG, tr F6U6H6 F6U6H6_MONDO, t | tGSG<br>GVA<br>SSSE          | SNR   | 95% | 69.9 | 50.22873 | Ref | 0.028  | -0.12 | 0.15  | -0.18 | -0.04 | -0.24 | 0.017 | 2680 | 2380 | 2330 | 3150 | 2750 | 2660 | 2410 | 2860 | 800.4 | 1598.8 | 2 | 0.0067 | 4.185 |
| Double-stranded RNA-binding protein Staufenhomolog 1 OS=Ailuropoda melanoleuca GN=STAU1 PE=3 SV=1 | 7 STAU1_AILME,sp O95793 STAU1_HUMAN,sp Q9Z108 STAU1_MOUSE, tr A2A5R8 A2A5R8_MOUSE, tr A2A5S2 A2A5S2_MOUSE, tr A2A5S3 A2A5S3_MOUSE, tr A6QNY4 A6QNY4_BOVIN, tr A8K622 A8K622_HUMAN, tr B3KRE0 B3KRE0_HUMAN, tr B4DPJ9 B4DPJ9    | eLLY<br>GGT<br>SPTA<br>ETILK | ETILK | 95% | 57.7 | 53.44461 | Ref | -0.061 | -0.34 | -0.05 | 2E-04 | -0.16 | -0.3  | -0.13 | 3210 | 2680 | 2390 | 3280 | 3750 | 2920 | 2770 | 3100 | 767.8 | 2300.3 | 3 | 0.0141 | 6.145 |

|                                                                                                          |                                                                                                                                                                                                                                                                                                                                 |                             |     |      |         |     |       |       |       |       |       |       |      |      |      |      |      |      |      |      |      |       |        |   |        |       |
|----------------------------------------------------------------------------------------------------------|---------------------------------------------------------------------------------------------------------------------------------------------------------------------------------------------------------------------------------------------------------------------------------------------------------------------------------|-----------------------------|-----|------|---------|-----|-------|-------|-------|-------|-------|-------|------|------|------|------|------|------|------|------|------|-------|--------|---|--------|-------|
| 40S ribosomal protein S3 OS=Canis familiaris GN=RPS3 PE=1 SV=1                                           | 7 RS3_CA<br>NFA,sp P<br>23396 RS<br>3_HUMA<br>N,sp P62<br>908 RS3_<br>MOUSE,s<br>p P62909<br> RS3_RAT<br>,sp Q0Z8<br>U2 RS3_P<br>IG,sp Q3T<br>169 RS3_<br>BOVIN,sp<br> Q5R465 <br>RS3_PON<br>AB,tr B2K<br>I51 B2KI5<br>1_RHIFE,t<br>r D2H1D2<br> D2H1D2<br>_AILME,tr<br> D3YV43 <br>D3YV43_<br>MOUSE,tr<br> E9PJH4 <br>E9PJH4_H | eLAE<br>DGY<br>SGVE<br>VR   | 95% | 48.5 | 51.5567 | Ref | 0.57  | -0.27 | 0.44  | 0.12  | -0.03 | 0.26  | 0.14 | 6830 | 8790 | 5330 | 9830 | 8660 | 6810 | 8710 | 7940 | 864.4 | 1726.9 | 2 | 0.0174 | 10.09 |
| NADH dehydrogenase [ubiquinone] iron-sulfur protein 4, mitochondrial OS=Homo sapiens GN=NDUFS4 PE=1 SV=1 | 1 NDUS4<br>_HUMAN,<br>sp POCB9<br>5 NDUS4<br>_PONAB,s<br>p POCB96<br> NDUS4_<br>PONPY,sp<br> Q02375 <br>NDUS4_B<br>OVIN,sp <br>Q0MQH0<br> NDUS4_<br>GORG0,s<br>p Q0MQ<br>H1 NDUS<br>4_PANTR,<br>sp Q9CXZ<br>1 NDUS4<br>_MOUSE,t<br>r D7NYH8<br> D7NYH8<br>_MINSC,tr<br> D7NYH9<br> D7NYH9<br>_CYNSP,tr<br> D7NYI0               | IDITT<br>LTGV<br>PEEH<br>ik | 95% | 57   | 53.4109 | Ref | -0.24 | -0.06 | -0.12 | -0.42 | 0.1   | -0.46 | -0.1 | 8200 | 6040 | 7420 | 8000 | 7130 | 8980 | 6330 | 8080 | 758.8 | 2273.3 | 3 | 0.0211 | 9.256 |

|                                                             |                                                                                                                                                                                                                                    |                                        |     |      |          |     |       |       |       |        |      |       |       |      |      |      |      |      |      |      |      |       |        |   |        |       |
|-------------------------------------------------------------|------------------------------------------------------------------------------------------------------------------------------------------------------------------------------------------------------------------------------------|----------------------------------------|-----|------|----------|-----|-------|-------|-------|--------|------|-------|-------|------|------|------|------|------|------|------|------|-------|--------|---|--------|-------|
| Density-regulated protein OS=Homo sapiens GN=DENR PE=1 SV=2 | sp O43583 DENR_HUMAN,sp Q2HJ47 DENR_BOVIN,sp Q5RFP5 DENR_PONAB,tr E1BIK7 E1BIK7_BOVIN,tr E2R300 E2R300_CANFA,tr F6X4Y8 F6X4Y8_HORSE,tr F7GK79 F7GK79_MAEMU,tr F8VVL1 F8VVL1_HUMAN,tr Q4R604 Q4R604_MAIFA                           | qEA<br>GISE<br>GQG<br>TAG<br>EEEE<br>k | 95% | 64   | 53.07308 | Ref | -0.11 | 0.068 | 0.087 | -0.32  | 0.39 | -0.65 | 0.016 | 2740 | 2200 | 2700 | 3070 | 2560 | 3640 | 1860 | 2920 | 819.7 | 2456.2 | 3 | 0.0295 | 11.99 |
| Zinc finger protein 207 OS=Homo sapiens GN=ZNF207 PE=1 SV=1 | 0 ZNF207_HUMAN,sp Q5R8K4 ZNF207_PONAB,tr A8MTG3 A8MTG3_HUMAN, tr B4DQT7 B4DQT7_HUMAN, tr D2GU63 D2GU63_AILME, tr D3ZEK1 D3ZEK1_RAT, tr D3ZHE8 D3ZHE8_RAT, tr E1P660 E1P660_HUMAN, tr E2RI63 E2RI63_CANIFA, tr E2RI65 E2RI65_CANIFA | IIHP<br>DEDI<br>SLEE<br>R              | 95% | 56.1 | 53.29412 | Ref | 0.41  | 0.51  | 0.049 | -0.086 | 0.51 | -0.18 | 0.36  | 6580 | 7620 | 8820 | 7200 | 7230 | 9570 | 6190 | 8890 | 624   | 1869   | 3 | 0.0154 | 8.247 |



|                                                                        |                                                                                                                                                                                                                                                                                                                               |                          |     |      |          |     |      |       |      |       |      |       |      |       |       |      |       |       |       |      |       |       |        |   |        |       |
|------------------------------------------------------------------------|-------------------------------------------------------------------------------------------------------------------------------------------------------------------------------------------------------------------------------------------------------------------------------------------------------------------------------|--------------------------|-----|------|----------|-----|------|-------|------|-------|------|-------|------|-------|-------|------|-------|-------|-------|------|-------|-------|--------|---|--------|-------|
| 40S ribosomal protein S16<br>OS=Mus musculus<br>GN=Rps16 PE=2<br>SV=4  | 1 RS16_MOUSE,s<br>p P62249<br> RS16_H<br>UMAN,sp<br> P62250 <br>RS16_RAT<br>,sp Q292<br>01 RS16_<br>PIG,sp Q3<br>TOX6 RS1<br>6_BOVIN,<br>tr A4FUS<br>1 A4FUS1<br>_MOUSE,t<br>r B0K038<br> B0K038_<br>RAT,tr B6<br>V8C7 B6V<br>8C7_PIG,t<br>r C0JKE5 <br>C0JKE5_C<br>AVPO,tr E<br>1BAT6 E1<br>BAT6_BO<br>VIN,tr F0<br>UY67 FOU | ILEP<br>VLLL<br>Gk       | 95% | 48.7 | 40.43362 | Ref | 0.52 | -0.41 | 0.7  | 0.056 | 0.48 | 0.02  | 0.58 | 2430  | 3040  | 1720 | 4180  | 2950  | 3450  | 2620 | 3830  | 568.4 | 1702.1 | 3 | 0.0073 | 4.285 |
| N-acetylglucosamine-6-sulfatase<br>OS=Homo sapiens<br>GN=GNS PE=1 SV=3 | 6 GNS_H<br>UMAN,sp<br> P50426 <br>GNS_CAP<br>HI,sp Q1L<br>ZH9 GNS<br>_BOVIN,s<br>p Q8BFR4<br> GNS_MO<br>USE,tr A8<br>K6V6 A8K<br>6V6_HUM<br>AN,tr B4<br>DTT0 B4D<br>TTO_HUM<br>AN,tr B4<br>DYH8 B4<br>DYH8_HU<br>MAN,tr B<br>4E284 B4<br>E284_HU<br>MAN,tr D<br>2HDL0 D<br>2HDL0_AI<br>LME,tr E1<br>B8S8 E1B<br>8S8_BOVI      | sDVL<br>VEY<br>QGE<br>GR | 95% | 53.9 | 51.84623 | Ref | 0.6  | -0.45 | 0.22 | -0.18 | 0.68 | -0.59 | 0.3  | 10800 | 14200 | 7480 | 13400 | 11100 | 17700 | 7650 | 14000 | 828.4 | 1654.8 | 2 | 0.0124 | 7.505 |

|                                                                                                                          |                                                                                                                                                                       |                                                              |     |      |          |     |       |       |       |        |       |       |       |       |       |       |       |       |       |       |       |       |        |   |        |       |
|--------------------------------------------------------------------------------------------------------------------------|-----------------------------------------------------------------------------------------------------------------------------------------------------------------------|--------------------------------------------------------------|-----|------|----------|-----|-------|-------|-------|--------|-------|-------|-------|-------|-------|-------|-------|-------|-------|-------|-------|-------|--------|---|--------|-------|
| Histone H1.5<br>OS=Homo sapiens<br>GN=HIST1H1B PE=1<br>SV=3                                                              | sp P16401 H15_HUMAN, tr F7BRW5 F7BRW5_MACMU                                                                                                                           | aLAA<br>GGY<br>DVEk                                          | 95% | 54.9 | 53.05166 | Ref | -1.3  | 0.43  | -1.7  | -0.35  | -0.78 | -0.32 | -0.7  | 30700 | 10800 | 38900 | 10100 | 28000 | 18200 | 26200 | 19900 | 851.5 | 1700.9 | 2 | 0.018  | 10.6  |
| Transcription factor<br>jun-B OS=Homo sapiens<br>GN=JUNB PE=1 SV=1                                                       | sp P17275 JUNB_HUMAN, sp Q0VBZ5 JUNB_BOVIN, tr E2RQI9 E2RQI9_CA_NFA, tr F6U5C5 F6U5C5_MA CMU, tr F6Y5A4 F6Y5A4_HO RSE, tr Q53HP8 Q53HP8_HUMAN, tr Q5U079 Q5U079_HUMAN | gGG<br>SGG<br>GAG<br>GAG<br>GGV<br>TEEQ<br>EGF<br>ADG<br>FVk | 95% | 91.5 | 54.22214 | Ref | -0.22 | -0.07 | -0.19 | -0.31  | 0.035 | -0.78 | -0.17 | 3380  | 2520  | 3040  | 3140  | 3180  | 3530  | 2100  | 3160  | 1007  | 3019.5 | 3 | 0.0177 | 5.861 |
| NADH<br>dehydrogenase<br>[ubiquinone] iron-sulfur protein 6,<br>mitochondrial<br>OS=Bos taurus<br>GN=NDUFS6 PE=1<br>SV=2 | sp P23934 NDUS6_BOVIN, tr A8YXY4 A8YXY4_BOVIN, tr F1S031 F1S031_PIG, tr F6XVS1 F6XVS1_HORSE                                                                           | vISc<br>DGG<br>GGA<br>LGH<br>PR                              | 95% | 58.3 | 51.35314 | Ref | 0.23  | 0.38  | -0.1  | -0.086 | 0.077 | 0.22  | 0.11  | 8530  | 8680  | 10500 | 8450  | 9380  | 9160  | 10600 | 9750  | 582.6 | 1744.8 | 3 | 0.0189 | 10.8  |

|                                                                       |                                                                                                                                                                                                                            |                            |     |      |          |     |      |       |      |        |       |       |       |       |       |       |       |       |       |       |       |       |        |   |        |       |
|-----------------------------------------------------------------------|----------------------------------------------------------------------------------------------------------------------------------------------------------------------------------------------------------------------------|----------------------------|-----|------|----------|-----|------|-------|------|--------|-------|-------|-------|-------|-------|-------|-------|-------|-------|-------|-------|-------|--------|---|--------|-------|
| 60S ribosomal protein L13<br>OS=Homo sapiens<br>GN=RPL13 PE=1<br>SV=4 | 3 RL13_HUMAN,sp P41123 RL13_RAT,sp P47963 RL13_MOUSE,sp Q56JZ1 RL13_BOVIN,sp Q9Z313 RL13_CRIGR,tr A8K4C8 A8K4C8_HUMAN, tr B4DLX3 B4DLX3_HUMAN, tr D2HVV4 D2HVV4_AILME, tr D3YX54 D3YX54_MOUSE, tr D3Z9H4 D3Z9H4_RAT, tr D3 | eAAE<br>QDV<br>Ek          | 95% | 48.8 | 52.61945 | Ref | 0.29 | -0.17 | 0.39 | -0.19  | 0.59  | -0.32 | 0.46  | 5330  | 5690  | 4470  | 7390  | 5470  | 8180  | 4540  | 7770  | 813.9 | 1625.9 | 2 | 0.0075 | 4.632 |
| 14-3-3 protein theta<br>OS=Homo sapiens<br>GN=YWHAQ PE=1<br>SV=1      | 8 1433T_HUMAN,sp P68254 1433T_MOUSE,sp P68255 1433T_RAT,sp Q3SZI4 1433T_BOVIN,sp Q5RFJ2 1433T_PONAB,sp Q6Q6X0 1433T_RABIT, tr A3KML3 A3KML3_MOUSE, tr B0JYM5 B0JYM5_BOVIN, tr D2HLL8 D2HLL8_AILME, tr D3ZM53 D3ZM53_RAT,   | avTE<br>QGA<br>ELSN<br>EER | 95% | 53.6 | 51.93598 | Ref | 0.15 | -0.4  | 0.24 | -0.049 | 0.098 | -0.53 | -0.09 | 18500 | 17800 | 13200 | 23100 | 20800 | 20100 | 13700 | 18300 | 919   | 1835.9 | 2 | 0.0132 | 7.16  |



|                                                                      |                                                                                                                    |             |     |      |          |     |                        |                               |                             |                               |                               |                               |                 |                        |                               |                              |                         |                               |                               |                               |     |       |        |   |        |       |
|----------------------------------------------------------------------|--------------------------------------------------------------------------------------------------------------------|-------------|-----|------|----------|-----|------------------------|-------------------------------|-----------------------------|-------------------------------|-------------------------------|-------------------------------|-----------------|------------------------|-------------------------------|------------------------------|-------------------------|-------------------------------|-------------------------------|-------------------------------|-----|-------|--------|---|--------|-------|
| Lysosome membrane protein 2 OS=Rattus norvegicus GN=Scarb2 PE=1 SV=2 | sp P27615 SCRB2_RAT, tr A6QQP4 A6QQP4_BOVIN, tr F1N1Q4 F1N1Q4_BOVIN                                                | gQGSTDEGTA  | 95% | 43.5 | 47.82902 | Ref | 0.37                   | -0.74                         | 0.37                        | -0.38                         | 0.33                          | -1.4                          | 0.11            | 848                    | 953                           | 479                          | 1160                    | 760                           | 1090                          | 349                           | 967 | 813.9 | 1625.7 | 2 | 0.0066 | 4.032 |
| Microtubule-associated protein 4 OS=Homo sapiens GN=MAP4 PE=1 SV=3   | sp P27816 MAP4_HUMAN, tr B9ZVR1 B9ZVR1_HUMAN, tr C6ZLB4 C6ZLB4_FELCA, tr E7EVA0 E7EVA0_HUMAN, tr F1SLI3 F1SLI3_PIG | eAQTLDSQIQE | 95% | 77.2 | 52.5994  | Ref | No Values (0.20238991) | Reference Missing (2.2384343) | No Values (-1.852022237726) | Reference Missing (1.6908888) | Reference Missing (1.6914568) | Reference Missing (2.0147984) | No Values (0.0) | No Values (0.20238991) | Reference Missing (2.2384343) | Reference Missing (1.852045) | No Values (-0.22237726) | Reference Missing (1.6908888) | Reference Missing (1.6914568) | Reference Missing (2.0147984) |     | 934   | 1865.9 | 2 | 0.0176 | 9.406 |

|                                                                                    |                                                                                                                                                                                                                        |                     |            |             |                 |            |              |              |              |              |              |              |              |             |             |             |             |             |             |             |             |              |               |          |               |              |
|------------------------------------------------------------------------------------|------------------------------------------------------------------------------------------------------------------------------------------------------------------------------------------------------------------------|---------------------|------------|-------------|-----------------|------------|--------------|--------------|--------------|--------------|--------------|--------------|--------------|-------------|-------------|-------------|-------------|-------------|-------------|-------------|-------------|--------------|---------------|----------|---------------|--------------|
| <p>Guanine nucleotide-binding protein-like 1 OS=Homo sapiens GN=GNL1 PE=1 SV=2</p> | <p>5 GNL1_HUMAN,sp P36916 GNL1_MOUSE,sp Q4R8D2 GNL1_MA CFA,sp Q5RA07 GNL1_PON AB,sp Q5TM59 GNL1_MAC MU,sp Q6MG06 GNL1_RAT,sp Q7YR35 GNL1_P ANTR,tr A2VDH5 A2VDH5_MOUSE,tr A5PJR9 A5PJR9_BOVIN,tr A8MPZO A8MPZO_HUM</p> | <p>iPVQ ALLH LR</p> | <p>95%</p> | <p>52.8</p> | <p>47.43996</p> | <p>Ref</p> | <p>0.057</p> | <p>-0.06</p> | <p>-0.22</p> | <p>-0.32</p> | <p>-0.24</p> | <p>-0.06</p> | <p>-0.42</p> | <p>1530</p> | <p>1380</p> | <p>1380</p> | <p>1400</p> | <p>1430</p> | <p>1320</p> | <p>1570</p> | <p>1210</p> | <p>488.6</p> | <p>1462.9</p> | <p>3</p> | <p>0.0108</p> | <p>7.39</p>  |
| <p>Thyroxine-binding globulin OS=Ovis aries GN=SERPINA7 PE=2 SV=1</p>              | <p>sp P50450 THBG_SHEEP,sp Q9TT35 THBG_PIG,sp Q9TT36 THBG_BOVIN,tr F1PB85 F1PB85_CANFA,tr F1RXM6 F1RXM6_PIG,tr F6ZRF6 F6ZRF6_HORSE,tr Q3SYR0 Q3SYR0_BOVIN</p>                                                          | <p>sFLLL ILEk</p>   | <p>95%</p> | <p>45.2</p> | <p>44.48598</p> | <p>Ref</p> | <p>1.2</p>   | <p>0.078</p> | <p>0.52</p>  | <p>0.12</p>  | <p>-0.35</p> | <p>0.67</p>  | <p>0.39</p>  | <p>505</p>  | <p>1000</p> | <p>503</p>  | <p>767</p>  | <p>640</p>  | <p>403</p>  | <p>855</p>  | <p>701</p>  | <p>562</p>   | <p>1683.1</p> | <p>3</p> | <p>0.0068</p> | <p>4.009</p> |

|                                                                                      |                                                                                                                                                                                                                                        |                          |            |             |                 |            |               |             |              |             |              |             |              |             |             |             |             |             |             |             |             |              |               |          |               |              |
|--------------------------------------------------------------------------------------|----------------------------------------------------------------------------------------------------------------------------------------------------------------------------------------------------------------------------------------|--------------------------|------------|-------------|-----------------|------------|---------------|-------------|--------------|-------------|--------------|-------------|--------------|-------------|-------------|-------------|-------------|-------------|-------------|-------------|-------------|--------------|---------------|----------|---------------|--------------|
| <p>Heterogeneous nuclear ribonucleoprotein M OS=Homo sapiens GN=HNRNPM PE=1 SV=3</p> | <p>2 HNRPM_HUMAN,sp Q62826 HNRPM_RAT,sp Q9D0E1 HNRPM_MOUSE,tri B8JK30 B8JK30_MOUSE,tri B8JK32 B8JK32_MOUSE,tri B8JK33 B8JK33_MOUSE,tri D2HZS9 D2HZS9_AILME,tri E2RMR3 E2RMR3_CANFA,tri E9Q0P7 E9Q0P7_MOUSE,tri F1L1V13 F1R</p>         | <p>mGP LGLD HMA SSIE</p> | <p>95%</p> | <p>57.6</p> | <p>53.04102</p> | <p>Ref</p> | <p>0.38</p>   | <p>0.13</p> | <p>-0.07</p> | <p>-0.1</p> | <p>0.018</p> | <p>0.1</p>  | <p>0.087</p> | <p>4800</p> | <p>5420</p> | <p>4970</p> | <p>4840</p> | <p>5210</p> | <p>4950</p> | <p>5470</p> | <p>5390</p> | <p>640</p>   | <p>1917</p>   | <p>3</p> | <p>0.0027</p> | <p>1.427</p> |
| <p>39S ribosomal protein L12, mitochondrial OS=Homo sapiens GN=MRPL12 PE=1 SV=2</p>  | <p>5 RM12_HUMAN,sp P52827 RM12_CRICR,sp Q7YR75 R M12_BOVIN,sp Q9DB15 RM12_MOUSE,tri D2GVF9 D2GVF9_AILME,tri D3ZXF9 D3ZXF9_RAT,tri E2QVI3 E2QVI3_CANFA,tri F6XA D7 F6XA D7_HORSE,tri F7H0R4 F7H0R4_MACM U,tri F7HX83 F7HX83_CALJA,t</p> | <p>aALE AVG GTV VLE</p>  | <p>95%</p> | <p>67.4</p> | <p>52.4701</p>  | <p>Ref</p> | <p>0.0062</p> | <p>0.12</p> | <p>-0.04</p> | <p>0.22</p> | <p>0.56</p>  | <p>0.34</p> | <p>0.64</p>  | <p>273</p>  | <p>238</p>  | <p>280</p>  | <p>280</p>  | <p>371</p>  | <p>409</p>  | <p>368</p>  | <p>448</p>  | <p>766.9</p> | <p>1531.9</p> | <p>2</p> | <p>0.0164</p> | <p>10.73</p> |

|                                                                      |                                                                                                                                                                                                                       |                         |     |      |          |     |      |       |       |       |       |      |       |       |       |       |       |       |       |       |       |       |        |   |        |       |
|----------------------------------------------------------------------|-----------------------------------------------------------------------------------------------------------------------------------------------------------------------------------------------------------------------|-------------------------|-----|------|----------|-----|------|-------|-------|-------|-------|------|-------|-------|-------|-------|-------|-------|-------|-------|-------|-------|--------|---|--------|-------|
| Ubiquitin-conjugating enzyme E2 N OS=Homo sapiens GN=UBE2N PE=1 SV=1 | 8 UBE2N_HUMAN,sp P61089 UBE2N_MOUSE,sp Q0P5K3 UBE2N_BOVIN,sp Q4R411 UBE2N_MACFA,sp Q5JXB2 UE2NL_HUMAN,sp Q5R7J6 UBE2N_PONAB,tra A2RTT4 A2RTT4_MOUSE,tra A5D987 A5D987_BOVIN,tra C5IS99 C5IS99_SHEEP,tra E1BHR2 E1BHR2 | TNEAQAIE                | 95% | 51.2 | 52.3472  | Ref | 0.14 | 0.016 | 0.21  | 0.042 | 0.052 | -0.1 | -0    | 12200 | 11700 | 11600 | 14900 | 14600 | 12900 | 12100 | 12800 | 754.4 | 1506.8 | 2 | 0.0116 | 7.678 |
| 40S ribosomal protein S15a OS=Homo sapiens GN=RPS15A PE=1 SV=2       | 4 RS15A_HUMAN,sp P62245 RS15A_MOUSE,sp P62246 RS15A_RAT,sp Q5R938 RS15A_PONAB,sp Q76I82 RS15A_BOVIN,tra A8K7H3 A8K7H3_HUMAN,tra B2R4W8 B2R4W8_HUMAN,tra D2GX76 D2GX76_AILME,tra D2HEL7 D2HEL7_AILME,tra D3YBZ8 D3YBZ8 | qFGFIVLTTSA GIM DHE EAR | 95% | 79.5 | 54.50625 | Ref | 0.45 | -0.09 | -0.09 | -0.18 | -0.57 | 0.26 | -0.01 | 182   | 216   | 161   | 182   | 188   | 125   | 232   | 191   | 842.8 | 2525.3 | 3 | 0.018  | 7.128 |

|                                                                      |                                                                                                                                                                                                                                    |                            |     |      |          |     |       |       |       |      |      |      |       |       |       |       |       |       |       |       |       |       |        |   |        |       |
|----------------------------------------------------------------------|------------------------------------------------------------------------------------------------------------------------------------------------------------------------------------------------------------------------------------|----------------------------|-----|------|----------|-----|-------|-------|-------|------|------|------|-------|-------|-------|-------|-------|-------|-------|-------|-------|-------|--------|---|--------|-------|
| Small nuclear ribonucleoprotein F OS=Homo sapiens GN=SNRPF PE=1 SV=1 | 6 RUXF_HUMAN,sp P62307 RUXF_MOUSE,sp Q3T028 RUXF_BOVIN,trans D4A39 RAT,trans D4AAT4 RAT,trans F1Q0L5 F1Q0L5_CANFA,trans F1SQR4 F1SQR4_PIG,trans F6Q5W2 F6Q5W2_ORNAN,trans F6UZL4 F6UZL4_CAJA,trans F7CC29 F7CC29_HORSE,trans F     | gVEE<br>EEED<br>GEM<br>RE  | 95% | 45.3 | 45.19447 | Ref | 0.3   | 0.38  | 0.44  | 0.27 | 0.46 | 0.26 | 0.65  | 11500 | 12300 | 14200 | 16600 | 16200 | 16100 | 14600 | 19100 | 921.4 | 1840.8 | 2 | 0.0123 | 6.684 |
| RNA-binding protein EWS OS=Homo sapiens GN=EWSR1 PE=1 SV=1           | 4 EWS_HUMAN,sp Q61545 EWS_MOUSE,trans B0QYK0 B0QYK0_HUMAN,trans B0QYK1 B0QYK1_HUMAN,trans B1WC50 B1WC50_RAT,trans C9JGE3 C9JGE3_HUMAN,trans D2H238 D2H238_AILME,trans D4A458 RAT,trans E2RA07 E2RA07_CANFA,trans E2RA46 E2RA46_CAN | gDAT<br>VSYE<br>DPPT<br>Ak | 95% | 65.4 | 53.90587 | Ref | -0.44 | -0.34 | -0.14 | -0.4 | 0.22 | -1.1 | -0.08 | 8610  | 5520  | 6390  | 8250  | 7630  | 10200 | 4250  | 8600  | 1030  | 2058.1 | 2 | 0.0114 | 5.559 |

|                                                                                |                                                                                                                                                                |                           |     |      |          |     |      |      |      |      |      |       |      |       |       |       |       |       |       |       |       |       |        |   |        |       |
|--------------------------------------------------------------------------------|----------------------------------------------------------------------------------------------------------------------------------------------------------------|---------------------------|-----|------|----------|-----|------|------|------|------|------|-------|------|-------|-------|-------|-------|-------|-------|-------|-------|-------|--------|---|--------|-------|
| CDGSH iron-sulfur domain-containing protein 2 OS=Bos taurus GN=CISD2 PE=2 SV=1 | sp Q05B71 CISD2_BOVIN,sp Q8N5K1 CISD2_HUMAN,tr E2R702 E2R702_CAFNA,tr F1MH13 F1MH13_BOVIN,tr F6URX4 F6URX4_MACMU,tr F6Z4H8 F6Z4H8_CALJA,tr F7E5W3 F7E5W3_MONDO | rLPV<br>PESI<br>TGF<br>AR | 95% | 53.9 | 52.69188 | Ref | 0.34 | 0.21 | 0.29 | 0.13 | 0.28 | 0.16  | 0.17 | 5580  | 6150  | 6080  | 7220  | 7120  | 6880  | 6630  | 6650  | 583   | 1746   | 3 | 0.0087 | 4.986 |
| Filamin-binding LIM protein 1 OS=Bos taurus GN=FBLIM1 PE=2 SV=1                | sp Q1JQB5 FBLI1_BOVIN                                                                                                                                          | rDEA<br>VVEE<br>VR        | 95% | 69.7 | 52.39485 | Ref | 0.65 | 0.31 | 0.31 | 0.13 | 0.22 | -0.24 | 0.22 | 17200 | 23500 | 20000 | 22500 | 21900 | 20300 | 15500 | 21100 | 502.6 | 1504.8 | 3 | 0.0103 | 6.857 |

|                                                                         |                                                                                                                                                                                                                           |                                        |     |      |          |     |       |       |       |      |       |       |       |       |      |       |       |       |       |       |       |       |        |   |        |       |
|-------------------------------------------------------------------------|---------------------------------------------------------------------------------------------------------------------------------------------------------------------------------------------------------------------------|----------------------------------------|-----|------|----------|-----|-------|-------|-------|------|-------|-------|-------|-------|------|-------|-------|-------|-------|-------|-------|-------|--------|---|--------|-------|
| RNA-binding protein 8A<br>OS=Rattus norvegicus<br>GN=Rbm8a PE=2<br>SV=1 | 01 RBM8A_RAT,sp Q3ZCE8 RBM8A_BOVIN,sp Q9CWXZ3 RBM8A_MOUSE,sp Q9Y559 RBM8A_HUMAN,tra D2HQ50 D2HQ50_AILME,tra E2QV85 E2QV85_CANFA,tra F2Z5K7 F2Z5K7_PIG,tra F6XEW8 F6XEW8_HORSE,tra F7DRZ4 F7DRZ4_CALIA,tra F7EF23 F7EF23_R | mRE<br>DYE<br>SVE<br>QDG<br>DEP<br>GPQ | 95% | 67.9 | 48.19004 | Ref | -0.12 | -0.06 | -0.41 | 0.34 | 0.023 | -0.19 | -0.07 | 12000 | 9560 | 10800 | 9530  | 17700 | 12400 | 11200 | 12000 | 843   | 2526.1 | 3 | 0.0181 | 7.146 |
| Protein FAM114A2<br>OS=Bos taurus<br>GN=FAM114A1<br>PE=2 SV=1           | 1 F1142_BOVIN,sp Q9NRY5 F1142_HUMAN,tra B3KTE4 B3KTE4_HUMAN,tra B4DQT0 B4DQT0_HUMAN,tra B4E1J2 B4E1J2_HUMAN,tra E7ESJ7 E7ESJ7_HUMAN,tra F1N189 F1N189_BOVIN,tra F6TP08 F6TP08_HORSE,tra F7H224 F7H224_MACMU,tra F7HTQ6 F7 | tAAL<br>VLH<br>GR                      | 95% | 55.8 | 50.64821 | Ref | 0.065 | -0.13 | -0    | -0.3 | 0.064 | -0.13 | -0.12 | 9810  | 8920 | 8460  | 10400 | 9290  | 10500 | 9530  | 9540  | 414.6 | 1240.8 | 3 | 0.0047 | 3.76  |

|                                                                |                                                                                                                                                                                                                     |                          |     |      |          |     |       |       |       |       |       |       |       |      |      |      |       |       |       |      |       |       |        |   |        |       |
|----------------------------------------------------------------|---------------------------------------------------------------------------------------------------------------------------------------------------------------------------------------------------------------------|--------------------------|-----|------|----------|-----|-------|-------|-------|-------|-------|-------|-------|------|------|------|-------|-------|-------|------|-------|-------|--------|---|--------|-------|
| GTP-binding protein SAR1a OS=Bos taurus GN=SAR1A PE=2 SV=1     | 7 SAR1A_BOVIN,sp Q52NJ3 SAR1A_PIG,sp Q5R548 SAR1A_PONAB,sp Q9NR31 SAR1A_HUMAN, tr B2R679 B2R679_HUMAN, tr B4DQ19 B4DQ19_HUMAN, tr D2GXH1 D2GXH1_AILME, tr E2RQR5 E2RQR5_CANFA, tr E9PBN0 E9PBN0_HUMAN, tr F1SUD3 F1 | elFG<br>LYG<br>QTT<br>Gk | 95% | 52.9 | 53.41227 | Ref | 0.16  | -0.23 | -0.18 | -0.14 | -0.25 | -0.19 | -0.21 | 2820 | 2740 | 2260 | 2630  | 2990  | 2410  | 2620 | 2580  | 641.4 | 1921.1 | 3 | 0.013  | 6.789 |
| Follistatin-related protein 1 OS=Bos taurus GN=FSTL1 PE=2 SV=1 | sp Q58D84 FSTL1_BOVIN                                                                                                                                                                                               | gAQ<br>TQA<br>EEE<br>MTR | 95% | 57.5 | 50.48438 | Ref | -0.45 | -0.02 | 0.11  | 0.085 | 0.61  | -0.29 | 0.83  | 8970 | 5700 | 8350 | 10300 | 11100 | 13900 | 7780 | 16800 | 827.9 | 1653.8 | 2 | 0.0125 | 7.58  |



|                                                                                |                                                                                                                                                                                                                                                                                                                                                     |                                      |            |             |                 |            |              |              |              |              |             |              |              |             |             |             |              |              |              |             |              |              |               |          |               |              |
|--------------------------------------------------------------------------------|-----------------------------------------------------------------------------------------------------------------------------------------------------------------------------------------------------------------------------------------------------------------------------------------------------------------------------------------------------|--------------------------------------|------------|-------------|-----------------|------------|--------------|--------------|--------------|--------------|-------------|--------------|--------------|-------------|-------------|-------------|--------------|--------------|--------------|-------------|--------------|--------------|---------------|----------|---------------|--------------|
| <p>Tumor protein D54<br/>OS=Pongo abelii<br/>GN=TPD52L2 PE=2<br/>SV=1</p>      | <p>1 TPD54_PONAB,sp<br/> Q6PCT3 <br/>TPD54_R<br/>AT,sp Q9<br/>CY22 TPD<br/>54_MOUS<br/>E,tr A2AU<br/>D5 A2AU<br/>D5_MOU<br/>SE,tr A2A<br/>UD6 A2A<br/>UD6_MO<br/>USE,tr A2<br/>AUE0 A2<br/>AUE0_MO<br/>USE,tr D3<br/>ZJ46 D3ZJ<br/>46_RAT,tr<br/> D3ZRQ2<br/> D3ZRQ2<br/>_RAT,tr D<br/>3ZW65 D<br/>3ZW65_R<br/>AT,tr F6V<br/>Q81 F6V<br/>Q81_MO</p> | <p>tSAA<br/>LST<br/>MGS<br/>AISR</p> | <p>95%</p> | <p>48.6</p> | <p>53.21099</p> | <p>Ref</p> | <p>-0.17</p> | <p>-0.14</p> | <p>0.026</p> | <p>0.011</p> | <p>0.34</p> | <p>-0.29</p> | <p>0.089</p> | <p>9500</p> | <p>7330</p> | <p>8140</p> | <p>10200</p> | <p>11200</p> | <p>12300</p> | <p>8280</p> | <p>10700</p> | <p>828.9</p> | <p>1655.9</p> | <p>2</p> | <p>0.0127</p> | <p>7.653</p> |
| <p>Zinc finger protein<br/>787 OS=Homo<br/>sapiens GN=ZNF787<br/>PE=1 SV=2</p> | <p>sp Q6DD<br/>87 ZN787<br/>_HUMAN,<br/>sp Q8BIF<br/>9 ZN787_<br/>MOUSE,tr<br/> D3ZDN6<br/> D3ZDN6<br/>_RAT,tr E<br/>1BGX5 E1<br/>BGX5_BO<br/>VIN,tr F1<br/>PSY3 F1P<br/>SY3_CANF<br/>A,tr F6ZIP<br/>9 F6ZIP9_<br/>MACMU</p>                                                                                                                        | <p>gFG<br/>HGA<br/>GLLA<br/>HQR</p>  | <p>95%</p> | <p>54.8</p> | <p>52.78264</p> | <p>Ref</p> | <p>0.041</p> | <p>0.026</p> | <p>0.35</p>  | <p>-0.12</p> | <p>0.39</p> | <p>-0.11</p> | <p>0.22</p>  | <p>3670</p> | <p>3280</p> | <p>3520</p> | <p>4960</p>  | <p>3920</p>  | <p>4890</p>  | <p>3620</p> | <p>4510</p>  | <p>407</p>   | <p>1623.9</p> | <p>4</p> | <p>0.0056</p> | <p>3.466</p> |

|                                                                                 |                                                                                                                                                                                                                             |                                 |     |      |          |     |      |       |       |        |       |       |      |      |      |      |      |      |      |      |      |       |        |   |        |       |
|---------------------------------------------------------------------------------|-----------------------------------------------------------------------------------------------------------------------------------------------------------------------------------------------------------------------------|---------------------------------|-----|------|----------|-----|------|-------|-------|--------|-------|-------|------|------|------|------|------|------|------|------|------|-------|--------|---|--------|-------|
| Plexin domain-containing protein 2<br>OS=Homo sapiens<br>GN=PLXDC2 PE=1<br>SV=1 | 1 PXDC2_HUMAN,sp Q9DC11 PXDC2_MOUSE,tra A0JN47 A0JN47_BOVIN,tra B1AY84 B1AY84_MOUSE,tra B1AY85 B1AY85_MOUSE,tra B1AY86 B1AY86_MOUSE,tra B4E367 B4E367_HUMAN,tra B5DEZ8 B5DEZ8_RAT,tra B7WP84 B7WP84_HUMAN,tra C0SQ70 C0SQ70 | vGLS<br>DAF<br>VVV<br>HR        | 95% | 77.5 | 52.16602 | Ref | 0.67 | 0.11  | 0.53  | -0.002 | 0.35  | -0.07 | 0.85 | 2450 | 3370 | 2480 | 3730 | 2850 | 3170 | 2470 | 4650 | 535   | 1601.9 | 3 | 0.005  | 3.117 |
| Alpha-2-macroglobulin<br>OS=Bos taurus<br>GN=A2M PE=1 SV=2                      | sp Q7SIH1 A2MG_BOVIN,tra E1BJW0 E1BJW0_BOVIN                                                                                                                                                                                | sPTS<br>QEV<br>MFL<br>TIQV<br>k | 95% | 53.9 | 53.78344 | Ref | 0.3  | -0.03 | -0.04 | 0.2    | -0.19 | 0.73  | -0.2 | 372  | 399  | 343  | 382  | 500  | 332  | 657  | 341  | 772.8 | 2315.3 | 3 | 0.0085 | 3.683 |

|                                                                                              |                                                                                                                                                                                                                                                                                                                            |                       |      |      |     |      |     |      |          |     |       |       |       |        |       |      |      |      |      |      |      |      |      |      |      |       |        |   |        |       |
|----------------------------------------------------------------------------------------------|----------------------------------------------------------------------------------------------------------------------------------------------------------------------------------------------------------------------------------------------------------------------------------------------------------------------------|-----------------------|------|------|-----|------|-----|------|----------|-----|-------|-------|-------|--------|-------|------|------|------|------|------|------|------|------|------|------|-------|--------|---|--------|-------|
| SH3 domain-containing kinase-binding protein 1<br>OS=Mus musculus<br>GN=Sh3kbp1 PE=1<br>SV=1 | 0 SH3K1_ MOUSE,s<br>p Q925Q<br>9 SH3K1_ RAT,sp Q<br>96B97 SH<br>3K1_HUM<br>AN,tr A2<br>AG61 A2<br>AG61_M<br>OUSE,tr A<br>4IF79 A4I<br>F79_BOVI<br>N,tr B1AV<br>E8 B1AVE<br>8_MOUSE<br>,tr B1AZ8<br>5 B1AZ85<br>_MOUSE,t<br>r D2GXZ2<br> D2GXZ2_<br>AILME,tr <br>D3ZBP1 <br>D3ZBP1_R<br>AT,tr E2R<br>JD8 E2RJ<br>D8_CANF    | k                     | eTTG | SESD | GGD | SSST | 95% | 72.9 | 50.86096 | Ref | -0.62 | -0.61 | -0.17 | -0.24  | 0.46  | -1.1 | 0.11 | 2730 | 1550 | 1690 | 2570 | 2700 | 3840 | 1330 | 3110 | 718.3 | 2152   | 3 | 0.0206 | 9.549 |
| Histone H1x<br>OS=Homo sapiens<br>GN=H1FX PE=1<br>SV=1                                       | 2 H1X_H<br>UMAN,tr <br>D2H7C5 <br>D2H7C5_<br>AILME,tr <br>D3ZIX4 D<br>3ZIX4_RA<br>T,tr E2RQ<br>07 E2RQ0<br>7_CANFA,<br>tr F1MM<br>U4 F1M<br>MU4_BO<br>VIN,tr F1<br>MP74 F1<br>MP74_BO<br>VIN,tr F1<br>MV98 F1<br>MV98_BO<br>VIN,tr F1<br>SPG1 F1S<br>PG1_PIG,t<br>r F6U5J8 <br>F6U5J8_O<br>RNAN,tr <br>F6Z1X9 F<br>6Z1X9_M | aLVQ<br>NDTL<br>LQVvk |      |      |     |      | 95% | 60.4 | 50.82688 | Ref | -0.05 | 0.29  | -0.2  | -0.082 | -0.04 | 0.19 | 0.17 | 5870 | 4930 | 6780 | 5420 | 6470 | 5830 | 7140 | 6990 | 650.7 | 1949.2 | 3 | 0.0132 | 6.782 |

|                                                                          |                                                                                                                                                                                                                                     |                   |     |      |          |     |       |      |       |       |       |       |       |      |      |       |      |       |       |      |       |       |        |   |        |       |
|--------------------------------------------------------------------------|-------------------------------------------------------------------------------------------------------------------------------------------------------------------------------------------------------------------------------------|-------------------|-----|------|----------|-----|-------|------|-------|-------|-------|-------|-------|------|------|-------|------|-------|-------|------|-------|-------|--------|---|--------|-------|
| Golgi reassembly-stacking protein 2 OS=Mus musculus GN=Gorasp2 PE=1 SV=3 | 3 GORS2_MOUSE,sp Q9H8Y8 GORS2_HUMAN,sp Q9R064 GORS2_RAT, tr A2ATI6 A2ATI6_MOUSE, tr A2ATI7 A2ATI7_MOUSE, tr A2ATI8 A2ATI8_MOUSE, tr A2ATI9 A2ATI9_MOUSE, tr B4DEI4 B4DEI4_HUMAN, tr B4DKT0 B4DKT0_HUMAN, tr B4DNR1 B4DNR1_MOUSE, tr | YVYNTDNTDNcR      | 95% | 44.3 | 47.39414 | Ref | 0.29  | 0.11 | -0.01 | 5E-04 | 0.056 | -0.04 | -0.15 | 5670 | 6030 | 5770  | 5960 | 6620  | 6010  | 5870 | 5420  | 913.9 | 1825.8 | 2 | 0.0205 | 11.22 |
| Protein canopy homolog 2 OS=Mus musculus GN=Cnpy2 PE=2 SV=1              | 0 CNPY2_MOUSE,sp Q9Y2B0 CNPY2_HUMAN, tr A0JN30 A0JN30_RAT, tr D2H353 D2H353_AILME, tr E2QVC3 E2QVC3_CANFA, tr F1MSP1 F1MSP1_BOVIN, tr F1SLY7 F1SLY7_PIG, tr F6Z678 F6Z678_MACMU, tr F7DEN7 F7DEN7_HORSE, tr F7H125 F7H125_C         | INPDGSSQSVVEVPYAR | 95% | 56.8 | 54.20216 | Ref | -0.39 | 0.27 | -0.1  | -0.09 | 0.43  | -0.33 | 0.023 | 9390 | 6210 | 10700 | 9240 | 10300 | 12900 | 7920 | 10100 | 1018  | 2034.1 | 2 | 0.0143 | 7.003 |

|                                                                                                 |                                                                                                                                                |                                  |     |      |          |     |                               |                        |                          |                         |                               |                               |                               |                  |                               |                     |                        |                         |                               |                               |                               |       |        |   |        |       |
|-------------------------------------------------------------------------------------------------|------------------------------------------------------------------------------------------------------------------------------------------------|----------------------------------|-----|------|----------|-----|-------------------------------|------------------------|--------------------------|-------------------------|-------------------------------|-------------------------------|-------------------------------|------------------|-------------------------------|---------------------|------------------------|-------------------------|-------------------------------|-------------------------------|-------------------------------|-------|--------|---|--------|-------|
| Putative uncharacterized protein (Fragment) OS=Ailuropoda melanoleuca GN=PANDA_015716 PE=3 SV=1 | tr D2HU05 D2HU05_AILME, tr E2RHL0 E2RHL0_CANFA, tr F1MKD7 F1MKD7_BOVIN, tr F1MU66 F1MU66_BOVIN, tr F1MUU7 F1MUU7_BOVIN, tr F6QA35 F6QA35_HORSE | aVAF QNP QAH VLEN LHA AAY R      | 95% | 55.6 | 55.16222 | Ref | 0.24                          | 0.087                  | 0.11                     | 0.13                    | 0.27                          | -0.19                         | 0.15                          | 927              | 951                           | 929                 | 1060                   | 1190                    | 1140                          | 863                           | 1080                          | 656.9 | 2623.4 | 4 | #####  | 0.133 |
| Bone marrow stromal cell antigen 2B OS=Ovis aries GN=Bst-2B PE=2 SV=1                           | tr D5JZS8 D5JZS8_SHEEP                                                                                                                         | qLN QPQ EVLH Ek                  | 95% | 56.3 | 53.73585 | Ref | -0.42                         | -0.39                  | 0.19                     | -0.056                  | 0.07                          | -0.88                         | 0.27                          | 8820             | 5710                          | 6360                | 10700                  | 9890                    | 9420                          | 5100                          | 11200                         | 691.1 | 2070.1 | 3 | 0.0252 | 12.17 |
| Uncharacterized protein OS=Bos taurus GN=SYNPO PE=4 SV=1                                        | tr E1BA93 E1BA93_BOVIN                                                                                                                         | rPLG NFTP PPTY AETL STAP LTSG VR | 95% | 75.1 | 55.43708 | Ref | Reference Missing (1.5899063) | No Value s (0.0846968) | No Value s (-0.08189826) | No Values (-0.22237736) | Reference Missing (1.2231872) | Reference Missing (1.2701883) | Reference Missing (1.2875856) | No Value s (0.0) | Reference Missing (1.5899063) | No Value s (0.0814) | No Values (-0.0819826) | No Values (-0.22237736) | Reference Missing (1.2231872) | Reference Missing (1.2701883) | Reference Missing (1.2875856) | 1017  | 3046.6 | 3 | 0.0123 | 4.045 |
| Uncharacterized protein OS=Bos taurus GN=NEXN PE=4 SV=1                                         | tr E1BDF0 E1BDF0_BOVIN, tr F1S9S8 F1S9S8_PIG                                                                                                   | qMV NEEE ENQ DTE NIFK            | 95% | 55.7 | 52.87237 | Ref | -0.94                         | 0.27                   | -1.5                     | -0.36                   | -1.2                          | -0.37                         | -1.6                          | 4880             | 2220                          | 5550                | 1890                   | 4420                    | 2130                          | 4020                          | 1690                          | 902.4 | 2704.3 | 3 | 0.0308 | 11.37 |

|                                                                               |                                                                                                                                                                                                                          |                                      |     |      |          |     |       |       |       |       |       |       |       |       |       |       |       |       |       |       |       |       |        |   |        |       |
|-------------------------------------------------------------------------------|--------------------------------------------------------------------------------------------------------------------------------------------------------------------------------------------------------------------------|--------------------------------------|-----|------|----------|-----|-------|-------|-------|-------|-------|-------|-------|-------|-------|-------|-------|-------|-------|-------|-------|-------|--------|---|--------|-------|
| Golgi phosphoprotein 3 (Coat-protein)<br>OS=Bos taurus<br>GN=GOLPH3 PE=2 SV=1 | tr Q1RMW9 Q1RMW9_BOVIN                                                                                                                                                                                                   | aAG<br>GGG<br>GND<br>EDD<br>AQS<br>R | 95% | 76.2 | 47.16471 | Ref | -0.34 | 0.3   | -0.13 | -0.15 | 0.15  | -0.11 | -0.02 | 479   | 330   | 557   | 464   | 504   | 543   | 474   | 500   | 594.3 | 1779.8 | 3 | 0.0071 | 3.963 |
| Deoxyhypusine hydroxylase OS=Bos taurus<br>GN=DOHH PE=1 SV=1                  | sp Q0VC53 DOHH_BOVIN                                                                                                                                                                                                     | aiPV<br>LLDV<br>LR                   | 95% | 45.5 | 46.83155 | Ref | 0.66  | 0.21  | 0.65  | -0.22 | -0.43 | -0.01 | -0.31 | 157   | 216   | 171   | 260   | 157   | 119   | 165   | 133   | 471.6 | 1411.9 | 3 | 0.0103 | 7.307 |
| YTH domain family protein 2 OS=Bos taurus<br>GN=YTHDF2 PE=2 SV=1              | 3 YTHD2_BOVIN,sp Q4R5D9 YTHD2_MACFA,sp Q9Y5A9 YTHD2_HUMAN, tr B5BU99 B5BU99_HUMAN, tr D2GWL2 D2GWL2_AILME, tr E2QWK6 E2QWK6_CANFA, tr F1PCG5 F1PCG5_CANFA, tr F5H817 F5H817_HUMAN, tr F6SGT3 F6SGT3_CAJA, tr F6T950 F6T9 | IGST<br>EVAS<br>NVP<br>k             | 95% | 51   | 52.48356 | Ref | 0.069 | -0.09 | 0.097 | -0.19 | 0.25  | -0.26 | 0.23  | 14500 | 13200 | 12800 | 16400 | 14800 | 17600 | 12800 | 17900 | 604   | 1809   | 3 | 0.0108 | 5.964 |

|                                                              |                                                                                                                                                                                                                        |                     |     |      |          |     |       |       |       |      |      |       |     |       |      |       |       |       |       |       |       |       |        |   |        |       |
|--------------------------------------------------------------|------------------------------------------------------------------------------------------------------------------------------------------------------------------------------------------------------------------------|---------------------|-----|------|----------|-----|-------|-------|-------|------|------|-------|-----|-------|------|-------|-------|-------|-------|-------|-------|-------|--------|---|--------|-------|
| Beta-2-microglobulin<br>OS=Bos taurus<br>GN=B2M PE=1 SV=2    | 8 B2MG_BOVIN,sp Q6QAT4 B2MG_SHEEP,tr A4ZVY6 A4ZVY6_SHEEP,tr A4ZVY7 A4ZVY7_SHEEP,tr A4ZVY8_SHEEP,tr A4ZVY9 A4ZVY9_SHEEP,tr F1N5H5 F1N5H5_BOVIN,tr Q1HI14 Q1HI14_CEREL,tr Q6VUQ8 Q6VUQ8_BOVIN,tr Q862Q3 Q862Q3_BOVI      | sEQS<br>DLSF<br>Sk  | 94% | 47.5 | 53.02619 | Ref | -1.4  | -0.24 | 0.022 | 0.44 | 0.34 | -0.38 | 0.2 | 16800 | 5460 | 13400 | 18000 | 26500 | 21700 | 13700 | 20400 | 868.5 | 1734.9 | 2 | 0.0083 | 4.764 |
| Protein CWC15 homolog<br>OS=Bos taurus GN=CWC15<br>PE=2 SV=1 | 3 CWC15_BOVIN,sp Q5BJP2 CWC15_RAT,sp Q5RE65 CWC15_POONAB,sp Q9JHS9 CWC15_MOUSE,sp Q9P013 CWC15_HUMAN,tr D2HT52 D2HT52_AILME,tr E2RQA3 E2RQA3_CAF1NFA,tr F1STJ3 F1STJ3_PIG,tr F6PQC3 F6PQC3_CALJA,tr F66XA31 F66XA31_MO | gTTQ<br>DAP<br>EEVR | 94% | 45.3 | 50.96117 | Ref | 0.048 | 0.9   | 0.3   | 0.37 | 1    | 0.28  | 1.1 | 1880  | 1690 | 3310  | 2460  | 2840  | 3830  | 2430  | 4260  | 789.4 | 1576.8 | 2 | 0.0138 | 8.729 |

|                                                              |                                                                                                                                                                                                                                        |                      |     |      |          |     |        |       |       |       |      |       |       |      |      |      |      |      |      |      |      |       |        |   |        |       |
|--------------------------------------------------------------|----------------------------------------------------------------------------------------------------------------------------------------------------------------------------------------------------------------------------------------|----------------------|-----|------|----------|-----|--------|-------|-------|-------|------|-------|-------|------|------|------|------|------|------|------|------|-------|--------|---|--------|-------|
| Transcription factor 4 OS=Canis familiaris GN=TCF4 PE=2 SV=2 | 1 ITF2_C ANFA,sp  P15884 IT F2_HUMA N,tr A6Q PK5 A6Q PK5_BOVI N,tr B3KT 62 B3KT6 2_HUMA N,tr B3KU C0 B3KU C0_HUM AN,tr B3K VA4 B3K VA4_HU MAN,tr B 4DUG3 B 4DUG3_H UMAN,tr  B7Z5M6  B7Z5M6_ HUMAN,t r B7Z6Y1  B7Z6Y1_ HUMAN,t r D2GZT6 | GSGA AGSS QTG DAL Gk | 94% | 51.5 | 53.78821 | Ref | 0.19   | -0.27 | 0.011 | -0.18 | 0.15 | -0.54 | -0.01 | 7760 | 7680 | 6080 | 8280 | 7990 | 8760 | 5670 | 8140 | 658   | 1971   | 3 | 0.0167 | 8.479 |
| Protein Red OS=Homo sapiens GN=IK PE=1 SV=3                  | 3 RED_H UMAN,sp  Q5NVI3  RED_PON AB,sp Q6 6HG8 RE D_RAT,sp  Q9Z1M8  RED_MO USE,tr A4 FUY8 A4F UY8_BOVI N,tr B2R5 Y4 B2R5Y 4_HUMA N,tr D2G UN7 D2G UN7_AIL ME,tr D6 RAY9 D6 RAY9_HU MAN,tr D 6RCQ4 D 6RCQ4_H UMAN,tr  D6REL4 D 6REL4_HU | eYNE DED PAA R       | 94% | 40.4 | 46.67219 | Ref | -0.065 | -0.16 | -0.33 | -0.17 | -0.2 | -0.25 | 0.003 | 3220 | 2680 | 2720 | 2710 | 3330 | 2860 | 2870 | 3410 | 806.9 | 1611.7 | 2 | 0.0135 | 8.382 |



|                                                                                                   |                                                                                                                                                                                                                             |                      |     |      |          |     |       |       |       |        |      |       |       |      |      |      |      |      |       |      |      |       |        |   |        |       |
|---------------------------------------------------------------------------------------------------|-----------------------------------------------------------------------------------------------------------------------------------------------------------------------------------------------------------------------------|----------------------|-----|------|----------|-----|-------|-------|-------|--------|------|-------|-------|------|------|------|------|------|-------|------|------|-------|--------|---|--------|-------|
| MAP7 domain-containing protein 1<br>OS=Mus musculus<br>GN=Map7d1 PE=1<br>SV=1                     | MA7D1_MOUSE,sp Q3KQU3 MA7D1_HUMAN, tr A2AJH9 A2AJH9_MOUSE, tr A2AJI1 A2AJI1_MOUSE, tr A8Y5P4 A8Y5P4_MOUSE, tr B5MDZ6 B5MDZ6_HUMAN, tr D3DPS3 D3DPS3_HUMAN, tr D3ZAY9 D3ZAY9_RAT, tr D3ZU44 D3ZU44_RAT, tr D4A644 D4A644_RAT | aQA<br>EQEE<br>QER   | 94% | 43   | 49.5639  | Ref | -0.36 | -0.07 | -0.2  | -0.21  | 0.21 | -0.7  | 0.089 | 7040 | 4770 | 6330 | 6500 | 7130 | 8320  | 4620 | 7910 | 761.4 | 1520.7 | 2 | 0.0118 | 7.76  |
| Eukaryotic translation initiation factor 2 subunit 1<br>OS=Homo sapiens<br>GN=EIF2S1 PE=1<br>SV=3 | F2A_HUMAN,sp P68101 F2A_RAT,sp P68102 F2A_BOVIN,sp Q5R493 F2A_PONAB,sp Q6ZWX6 F2A_MOUSE, tr D2HRG8 D2HRG8_AILME, tr E2QVA3 E2QVA3_CANFA, tr F2Z5J8 F2Z5J8_PIG, tr F6Q1N2 F6Q1N2_ORF6RU41 F6RU41_MOUSE, tr F6NDO, tr F6      | WVTD<br>TDET<br>ELAR | 94% | 45.6 | 52.18107 | Ref | 0.14  | -0.1  | 0.091 | -0.049 | 0.27 | -0.22 | 0.077 | 8250 | 7890 | 7240 | 9300 | 9300 | 10100 | 7550 | 9180 | 826.9 | 1651.8 | 2 | 0.0151 | 9.138 |

|                                                                                 |                                                                                                                                                                                                                                   |                            |     |      |          |     |       |       |       |       |       |       |       |       |       |       |       |       |       |      |       |       |        |   |        |       |
|---------------------------------------------------------------------------------|-----------------------------------------------------------------------------------------------------------------------------------------------------------------------------------------------------------------------------------|----------------------------|-----|------|----------|-----|-------|-------|-------|-------|-------|-------|-------|-------|-------|-------|-------|-------|-------|------|-------|-------|--------|---|--------|-------|
| Meiotic recombination protein SPO11<br>OS=Mus musculus<br>GN=Spo11 PE=2<br>SV=2 | K8 SPO11_MOUSE,sp Q9Y5K1 SPO11_HUMAN,ter A2ASD0 A2ASD0_MOUSE,ter A2ASD1 A2ASD1_MOUSE,ter A2ASD2 A2ASD2_MOUSE,ter A5GFN4 A5GFN4_PIG,ter A5GFN5 A5GFN5_PIG,ter A6NLT8 HUMAN,ter D2H1Z1 ALME,ter D3Z8A8 D3Z8A8                       | gLIA<br>GnLR               | 94% | 43.8 | 50.45288 | Ref | -0.46 | -0.43 | -0.39 | -0.28 | -0.08 | -1    | -0.58 | 16400 | 10400 | 11400 | 13200 | 15800 | 15800 | 8490 | 11600 | 559.8 | 1117.7 | 2 | 0.0057 | 5.107 |
|                                                                                 | 9 VAPB_BOVIN,sp A5GFS8 VAPB_PIG,sp O95292 VAPB_HUMAN,sp Q9QY76 VAPB_MOUSE,sp Q9Z269 VAPB_RAT,ter E2RRB7 E2RRB7_CANF,A,ter E5RK64 E5RK64_HUMAN,ter F7ATW4 F7ATW4_MACMU,ter F7E7N1 F7E7N1_MOB OS=Bos taurus<br>GN=VAPB PE=2<br>SV=1 | VEQ<br>VLSL<br>EPQ<br>HELK | 93% | 49.1 | 53.26831 | Ref | -0.35 | -0.01 | -0.08 | -0.1  | -0.02 | -0.26 | -0.1  | 7270  | 4950  | 6790  | 7260  | 7910  | 7330  | 6450 | 7180  | 753.1 | 2256.3 | 3 | 0.015  | 6.647 |

|                                                                                    |                                                                                                                                                                                                                                                                                                                          |                         |     |      |          |     |       |       |       |       |       |      |       |      |      |      |      |       |       |      |       |       |        |  |  |   |        |       |
|------------------------------------------------------------------------------------|--------------------------------------------------------------------------------------------------------------------------------------------------------------------------------------------------------------------------------------------------------------------------------------------------------------------------|-------------------------|-----|------|----------|-----|-------|-------|-------|-------|-------|------|-------|------|------|------|------|-------|-------|------|-------|-------|--------|--|--|---|--------|-------|
| Coatomer subunit<br>epsilon OS=Homo<br>sapiens GN=COPE<br>PE=1 SV=3                | 9 COPE_<br>HUMAN,s<br>p Q28104<br> COPE_B<br>OVIN,sp <br>Q5RFR8 <br>COPE_PO<br>NAB,tr A<br>1XEC5 A1<br>XEC5_BO<br>VIN,tr A6<br>MK98 A6<br>MK98_CA<br>LJA,tr A6<br>NE29 A6<br>NE29_HU<br>MAN,tr A<br>6NKA3 A<br>6NKA3_H<br>UMAN,tr <br>D2GV44 <br>D2GV44_<br>AILME,tr <br>E2RAT6 E<br>2RAT6_C<br>ANFA,tr F<br>1RXG7 F1    | VLQ,<br>YAPS<br>A       | 93% | 44.2 | 51.55907 | Ref | 0.098 | -0.27 | -0.01 | -0.27 | 0.098 | 0.3  | -0.02 | 583  | 542  | 457  | 612  | 565   | 635   | 766  | 605   | 633.4 | 1264.7 |  |  | 2 | 0.0158 | 12.52 |
| V-type proton<br>ATPase subunit G 1<br>OS=Homo sapiens<br>GN=ATP6V1G1<br>PE=1 SV=3 | 8 VATG1<br>_HUMAN,<br>sp Q9CR5<br>1 VATG1<br>_MOUSE,t<br>r B2GUV5<br> B2GUV5<br>_RAT,tr D<br>2H210 D2<br>H210_AIL<br>ME,tr D7<br>NY50 D7<br>NY50_SC<br>OKU,tr D<br>7NY51 D7<br>NY51_MI<br>NSC,tr D7<br>NY52 D7<br>NY52_CY<br>NSP,tr D7<br>NY53 D7<br>NY53_RO<br>ULE,tr F1<br>PWU9 F1<br>PWU9_CA<br>NFA,tr F1<br>SMJ7 F1S | eEA<br>QAEI<br>EQY<br>R | 93% | 43.2 | 50.82409 | Ref | 0.12  | 0.37  | 0.42  | 0.59  | 0.83  | 0.34 | 0.86  | 5770 | 5460 | 7040 | 8200 | 10100 | 10500 | 7790 | 11100 | 835.4 | 1668.8 |  |  | 2 | 0.0167 | 9.999 |



|                                                                                         |                                                                                                                                                                                                                                                                                                                      |                            |     |      |          |     |      |      |       |      |       |      |       |       |      |      |      |      |      |      |      |       |        |   |        |       |
|-----------------------------------------------------------------------------------------|----------------------------------------------------------------------------------------------------------------------------------------------------------------------------------------------------------------------------------------------------------------------------------------------------------------------|----------------------------|-----|------|----------|-----|------|------|-------|------|-------|------|-------|-------|------|------|------|------|------|------|------|-------|--------|---|--------|-------|
| Ubiquitin-like<br>modifier-activating<br>enzyme 1 OS=Bos<br>taurus GN=UBA1<br>PE=2 SV=1 | V5 UBA1<br>_BOVIN,s<br>p P22314<br> UBA1_H<br>UMAN,sp<br> P31255 <br>UBE1Y_M<br>ACRU,sp <br>Q02053 <br>UBA1_M<br>OUSE,sp <br>Q29504 <br>UBA1_RA<br>BIT,sp Q5<br>U300 UB<br>A1_RAT,tr<br> A7LAC4 <br>A7LAC4_R<br>AT,tr B4D<br>DE4 B4D<br>DE4_HUM<br>AN,tr B4<br>DL67 B4D<br>L67_HUM<br>AN,tr B9E<br>HN0 B9E<br>HN0_MO | nFPN<br>AIEH<br>TLQ<br>WAR | 92% | 48.7 | 53.81216 | Ref | 0.39 | -0.1 | -0.06 | 0.26 | 0.016 | 0.47 | 0.28  | 926   | 1060 | 814  | 939  | 1290 | 954  | 1360 | 1190 | 667.7 | 2000   | 3 | 0.0079 | 3.956 |
| LFA-3(Delta D2)<br>OS=Ovis sp. PE=2<br>SV=1                                             | tr Q2875<br>2 Q28752<br>_9CETA,tr<br> Q28753 <br>Q28753_9<br>CETA,tr Q<br>28754 Q2<br>8754_9CE<br>TA                                                                                                                                                                                                                 | IDED<br>VYEI<br>ESPS<br>Vk | 92% | 49.2 | 54.31348 | Ref | -1   | -1.2 | -0.88 | -0.8 | -0.63 | -1.2 | -0.85 | 12300 | 5200 | 4950 | 7070 | 8240 | 8110 | 5750 | 7190 | 744.4 | 2230.2 | 3 | 0.0154 | 6.882 |

|                                                                                                      |                                                                                                                                                                                                                           |                              |            |             |                 |            |             |              |              |               |              |              |              |             |             |             |             |             |             |             |             |              |               |          |               |              |
|------------------------------------------------------------------------------------------------------|---------------------------------------------------------------------------------------------------------------------------------------------------------------------------------------------------------------------------|------------------------------|------------|-------------|-----------------|------------|-------------|--------------|--------------|---------------|--------------|--------------|--------------|-------------|-------------|-------------|-------------|-------------|-------------|-------------|-------------|--------------|---------------|----------|---------------|--------------|
| <p>26S proteasome non-ATPase regulatory subunit 6<br/>OS=Homo sapiens<br/>GN=PSMD6 PE=1<br/>SV=1</p> | <p>8 PSMD6_HUMAN,sp Q3T0B2 PSMD6_BOVIN,sp Q99J14 PSMD6_MOUSE,tr C9IZE4 C9IZE4_HUMAN,tr C9J7B7 C9J7B7_HUMAN,tr D2H1Q0 D2H1Q0_AILME,tr F1MXE4 F1MXE4_BOVIN,tr F1SGF1 F1SGF1_PIG,tr F6PLG4 F6PLG4_MONDO,tr F7BGG5 F7BGG5</p> | <p>fLLSL PEH R</p>           | <p>92%</p> | <p>46.3</p> | <p>51.51557</p> | <p>Ref</p> | <p>-0.2</p> | <p>-0.51</p> | <p>-0.07</p> | <p>-0.38</p>  | <p>-0.08</p> | <p>-0.44</p> | <p>-0.03</p> | <p>3260</p> | <p>2470</p> | <p>2160</p> | <p>3290</p> | <p>2910</p> | <p>3150</p> | <p>2550</p> | <p>3380</p> | <p>472.6</p> | <p>1414.8</p> | <p>3</p> | <p>0.0166</p> | <p>11.7</p>  |
| <p>GLO1 protein<br/>OS=Bos taurus<br/>GN=GLO1 PE=2<br/>SV=1</p>                                      | <p>tr A4FUZ1 A4FUZ1_BOVIN,tr D2HVT9 D2HVT9_AILME,tr F1MUW8 F1MUW8_BOVIN,tr F1RVR3 F1RVR3_PIG</p>                                                                                                                          | <p>gFG HIGI AVP DVH GAck</p> | <p>92%</p> | <p>49.4</p> | <p>54.67661</p> | <p>Ref</p> | <p>0.28</p> | <p>-0.22</p> | <p>-0.06</p> | <p>-0.081</p> | <p>-0</p>    | <p>-0.01</p> | <p>-0.16</p> | <p>1140</p> | <p>1200</p> | <p>921</p>  | <p>1150</p> | <p>1260</p> | <p>1160</p> | <p>1200</p> | <p>1080</p> | <p>778.1</p> | <p>2331.2</p> | <p>3</p> | <p>0.0043</p> | <p>1.829</p> |

|                                                                                  |                                                                                                                                                                                                                  |                         |     |      |          |     |       |       |       |        |       |       |       |       |      |      |       |       |       |      |       |       |        |   |        |       |
|----------------------------------------------------------------------------------|------------------------------------------------------------------------------------------------------------------------------------------------------------------------------------------------------------------|-------------------------|-----|------|----------|-----|-------|-------|-------|--------|-------|-------|-------|-------|------|------|-------|-------|-------|------|-------|-------|--------|---|--------|-------|
| 40S ribosomal protein S14<br>OS=Rattus norvegicus<br>GN=Rps14 PE=2<br>SV=3       | 1 RS14_RAT,sp P62263 RS14_HUMAN,sp P62264 RS14_MOUSE,sp P62265 RS14_CRIGR,tr A4D1M5 A4D1M5_HUMAN,tr D2H8L8 D2H8L8_AILME,tr D3YVF4 D3YVF4_MOUSE,tr D3Z711 D3Z711_MOUSE,tr D4A290 D4A290_RAT,tr D9ZLV2 D9ZLV2_AILM | eLGI<br>TALH<br>Ik      | 92% | 43.7 | 49.02612 | Ref | 0.21  | -0.19 | 0.3   | -0.018 | -0.05 | -0.03 | -0.01 | 8690  | 8710 | 7200 | 11300 | 10000 | 8580  | 9060 | 9110  | 568.4 | 1702.1 | 3 | 0.0068 | 3.972 |
| Galectin-3-binding protein OS=Bos taurus<br>GN=LGALS3BP PE=1<br>SV=1             | sp A7E3W2 LG3B_P_BOVIN                                                                                                                                                                                           | IADG<br>GSA<br>NqG<br>R | 92% | 41.9 | 50.26566 | Ref | -0.63 | -0.41 | -0.24 | 0.002  | 0.001 | -0.63 | -0.12 | 10900 | 6100 | 7710 | 9740  | 12700 | 11100 | 7480 | 10500 | 675.8 | 1349.7 | 2 | 0.0106 | 7.841 |
| LOC100138545 protein (Fragment)<br>OS=Bos taurus<br>GN=LOC100138545<br>PE=2 SV=1 | tr A6QQE3 A6QQE3_BOVIN, tr E5L8L8 E5L8L8_BOVIN                                                                                                                                                                   | eVV<br>AHV<br>LEQE<br>R | 92% | 46.5 | 52.7206  | Ref | 0.18  | -0.1  | -0.1  | -0.054 | -0.28 | -0.13 | 0.049 | 8420  | 8300 | 7410 | 8320  | 9460  | 7080  | 8190 | 9200  | 538.3 | 1611.9 | 3 | 0.0112 | 6.927 |

|                                                                                                                 |                                                                                                                                                                                                                                    |                                     |            |             |                 |            |              |              |              |              |              |              |              |             |             |             |             |             |             |             |             |              |               |          |               |              |
|-----------------------------------------------------------------------------------------------------------------|------------------------------------------------------------------------------------------------------------------------------------------------------------------------------------------------------------------------------------|-------------------------------------|------------|-------------|-----------------|------------|--------------|--------------|--------------|--------------|--------------|--------------|--------------|-------------|-------------|-------------|-------------|-------------|-------------|-------------|-------------|--------------|---------------|----------|---------------|--------------|
| <p>Craniofacial development protein 2 OS=Bos taurus GN=CFDP2 PE=1 SV=2</p>                                      | <p>sp O02751 CFDP2_BOVIN, tr B6F238 B6F238_CA PHI, tr F1MS40 F1MS40_BOVIN, tr Q4ADK3 Q4ADK3_MU NRE, tr Q7YRU5 Q7YRU5_GIR CA, tr Q8S Q39 Q8S Q39_CER NI</p>                                                                         | <p>IIEFc<br/>HHN<br/>R</p>          | <p>91%</p> | <p>43.6</p> | <p>50.3356</p>  | <p>Ref</p> | <p>0.37</p>  | <p>-0.19</p> | <p>0.081</p> | <p>-0.23</p> | <p>0.029</p> | <p>-0.13</p> | <p>0.2</p>   | <p>1670</p> | <p>1870</p> | <p>1380</p> | <p>1870</p> | <p>1660</p> | <p>1730</p> | <p>1620</p> | <p>2030</p> | <p>506.9</p> | <p>1517.7</p> | <p>3</p> | <p>0.0093</p> | <p>6.139</p> |
| <p>Small glutamine-rich tetratricopeptide repeat-containing protein alpha OS=Homo sapiens GN=SGTA PE=1 SV=1</p> | <p>5 SGTA_HUMAN, sp Q32LM2 SGTA_BOVIN, tr B4DEA6 B4DEA6_HUMAN, tr D2HMF6 D2HMF6_A ILME, tr E2R2T8 R2T8_CAFNA, tr E7EMJ6 E7EMJ6_HUMAN, tr F1S8G6 F1S8G6_PIG, tr F7FGF5 F7FGF5_MACMU, tr F7H688 F7H688_CALJA, tr F7H696 F7H696_C</p> | <p>VENF<br/>EAA<br/>VHFY<br/>Gk</p> | <p>91%</p> | <p>47.2</p> | <p>54.10004</p> | <p>Ref</p> | <p>-0.15</p> | <p>-0.23</p> | <p>0.097</p> | <p>-0.14</p> | <p>0.11</p>  | <p>-0.41</p> | <p>-0.04</p> | <p>2210</p> | <p>1730</p> | <p>1780</p> | <p>2500</p> | <p>2340</p> | <p>2440</p> | <p>1770</p> | <p>2270</p> | <p>707</p>   | <p>2118.1</p> | <p>3</p> | <p>0.011</p>  | <p>5.178</p> |



|                                                                        |                                                                                                                                                                                                                                                                                                                                                                       |                                      |            |             |                 |            |              |              |              |               |              |              |              |              |             |             |              |              |              |              |              |              |               |          |               |              |
|------------------------------------------------------------------------|-----------------------------------------------------------------------------------------------------------------------------------------------------------------------------------------------------------------------------------------------------------------------------------------------------------------------------------------------------------------------|--------------------------------------|------------|-------------|-----------------|------------|--------------|--------------|--------------|---------------|--------------|--------------|--------------|--------------|-------------|-------------|--------------|--------------|--------------|--------------|--------------|--------------|---------------|----------|---------------|--------------|
| <p>Integrin-linked protein kinase OS=Mus musculus GN=Ilk PE=1 SV=2</p> | <p>2 ILK_MO<br/>USE,sp P5<br/>7044 ILK_<br/>CAVPO,sp<br/> Q13418 <br/>ILK_HUM<br/>AN,sp Q3<br/>SWY2 ILK<br/>_BOVIN,s<br/>p Q5R5V<br/>4 ILK_PO<br/>NAB,sp Q<br/>99J82 ILK<br/>_RAT,tr B<br/>7Z1I0 B7Z<br/>1I0_HUM<br/>AN,tr B7Z<br/>418 B7Z4<br/>18_HUMA<br/>N,tr COSS<br/>X9 COSSX<br/>9_CRIGR,t<br/>r D2HR59<br/> D2HR59<br/>_AILME,tr<br/> E2R5H4 <br/>E2R5H4_C</p> | <p>gMA<br/>FLHT<br/>LEPLI<br/>PR</p> | <p>91%</p> | <p>46.2</p> | <p>53.11548</p> | <p>Ref</p> | <p>-0.23</p> | <p>-0.46</p> | <p>-0.4</p>  | <p>-0.19</p>  | <p>-0.71</p> | <p>-0.23</p> | <p>-0.5</p>  | <p>418</p>   | <p>310</p>  | <p>286</p>  | <p>334</p>   | <p>427</p>   | <p>261</p>   | <p>379</p>   | <p>311</p>   | <p>633.7</p> | <p>1898.1</p> | <p>3</p> | <p>0.0082</p> | <p>4.304</p> |
| <p>T-complex protein 1 subunit eta OS=Bos taurus GN=CCT7 PE=1 SV=1</p> | <p>sp Q2NKZ<br/>1 TCPH_B<br/>OVIN,tr F<br/>1MWR8 <br/>F1MWR8<br/>_BOVIN</p>                                                                                                                                                                                                                                                                                           | <p>sTVD<br/>ASPA<br/>AGR</p>         | <p>91%</p> | <p>41.7</p> | <p>51.00308</p> | <p>Ref</p> | <p>-0.27</p> | <p>-0.11</p> | <p>-0.07</p> | <p>-0.081</p> | <p>0.085</p> | <p>0.004</p> | <p>0.047</p> | <p>10800</p> | <p>7770</p> | <p>9400</p> | <p>10900</p> | <p>11900</p> | <p>11600</p> | <p>11500</p> | <p>11700</p> | <p>668.4</p> | <p>1334.7</p> | <p>2</p> | <p>0.01</p>   | <p>7.471</p> |

|                                                                                                   |                                                                                                                                                                                                                             |               |     |      |          |     |        |       |       |       |       |       |       |       |        |       |        |        |       |       |        |       |        |   |        |       |
|---------------------------------------------------------------------------------------------------|-----------------------------------------------------------------------------------------------------------------------------------------------------------------------------------------------------------------------------|---------------|-----|------|----------|-----|--------|-------|-------|-------|-------|-------|-------|-------|--------|-------|--------|--------|-------|-------|--------|-------|--------|---|--------|-------|
| Platelet-activating factor acetylhydrolase IB subunit gamma OS=Homo sapiens GN=PAFAH1B3 PE=1 SV=1 | 2 PA1B3_HUMAN,sp Q29460 PA1B3_BOVIN,sp Q5R6X1 PA1B3_PO NAB,tr D2H2H2 D2H2H2_AI LME,tr E2RLA8 E2RLA8_CANFA,tr F1RGI2 F1RGI2_PIG,tr F6TCP3 F6TCP3_MA CMU,tr F7DB59 F7DB59_HO RSE,tr F7GVZ1 F7GVZ1_MA CMU,tr F7H805 F7H805_CAL | aALAGHP       | 91% | 43.4 | 50.33344 | Ref | -0.032 | -0.05 | -0.19 | -0.31 | -0.05 | -0.41 | -0.25 | 13700 | 11700  | 12600 | 12800  | 13000  | 13500 | 11000 | 12200  | 366.2 | 1095.6 | 3 | 0.011  | 10.01 |
| Secretory phospholipase A2 receptor OS=Homo sapiens GN=PLA2R1 PE=1 SV=2                           | sp Q13018 PLA2R_HUMAN,sp Q5R880 PLA2R_PONAB,tr B7ZML4 B7ZML4_HUMAN,tr F6Y1A5 F6Y1A5_HORSE                                                                                                                                   | ILEWqDK       | 91% | 41.6 | 51.09953 | Ref | -0.48  | -0.03 | -1.3  | -0.37 | -0.97 | -0.24 | -0.94 | 6E+05 | 350000 | 5E+05 | 248000 | 509000 | 3E+05 | 5E+05 | 309000 | 618.8 | 1235.7 | 2 | 0.0143 | 11.53 |
| Glutathione S-transferase P OS=Bos taurus GN=GSTP1 PE=1 SV=2                                      | sp P28801 GSTP1_BOVIN,tr Q9TRF8 Q9TRF8_RABIT,tr Q9TRQ0 Q9TRQ0_BOVIN                                                                                                                                                         | pPYTIVYFPVQGR | 91% | 44   | 53.484   | Ref | 0.3    | -0.43 | -0.02 | -0.15 | 0.066 | -0.3  | -0.18 | 9470  | 10200  | 6610  | 9910   | 9990   | 10100 | 8190  | 8830   | 921   | 1840   | 2 | 0.0129 | 7.011 |

|                                                                                        |                                                                                                                                                                                                                                             |                           |     |      |          |     |       |       |       |       |       |       |       |       |      |       |       |       |       |       |       |       |        |   |        |       |
|----------------------------------------------------------------------------------------|---------------------------------------------------------------------------------------------------------------------------------------------------------------------------------------------------------------------------------------------|---------------------------|-----|------|----------|-----|-------|-------|-------|-------|-------|-------|-------|-------|------|-------|-------|-------|-------|-------|-------|-------|--------|---|--------|-------|
| Ubiquitin-conjugating enzyme E2 J1 OS=Homo sapiens GN=UBE2J1 PE=1 SV=2                 | 5 UB2J1_HUMAN, tr B4DUF8 B4DUF8_HUMAN, tr D2HK27 D2HK27_AILME, tr E2R4Q6 E2R4Q6_CANFA, tr F1MBQ2 F1MBQ2_BOVIN, tr F5GWD1 F5GWD1_HUMAN, tr F6Q7G1 F6Q7G1_HORSE, tr F6WK78 F6WK78_CALJA, tr F6WK86 F6WK86_CALJA, tr F7F155 F                  | sGSD<br>SSQ<br>ADQ<br>EAK | 91% | 44.9 | 52.21758 | Ref | -0.32 | -0.5  | -0.58 | -0.44 | -0.24 | -0.63 | -0.63 | 6360  | 4420 | 4250  | 4520  | 5480  | 5500  | 4390  | 4340  | 640   | 1916.9 | 3 | 0.0135 | 7.052 |
| Sodium/potassium-transporting ATPase subunit alpha-1 OS=Ovis aries GN=ATP1A1 PE=1 SV=1 | 4 AT1A1_SHEEP, sp P05023 AT1A1_HUMAN, sp P05024 AT1A1_PIG, sp P06685 AT1A1_RAT, sp P50997 AT1A1_CANFA, sp Q08DA1 AT1A1_BOVIN, sp Q5RDR3 AT1A1_PONAB, sp Q8VDN2 AT1A1_MOUSE, sp Q9NOZ6 AT1A1_RABBIT, tr B3SIO6 B3SIO6_CALJA, tr B3VPO, tr B3 | ISLD<br>ELHR              | 90% | 43.6 | 50.90833 | Ref | -0.28 | -0.15 | 0.17  | -0.27 | 0.11  | -0.28 | -0.22 | 12000 | 8610 | 10300 | 14300 | 11600 | 13200 | 10500 | 10900 | 429.6 | 1285.7 | 3 | 0.0077 | 6.012 |

|                                                                                                          |                                                                                                                                                                                                                          |                                  |     |      |          |     |        |       |       |       |       |       |       |       |       |       |       |       |       |       |       |       |        |   |        |       |
|----------------------------------------------------------------------------------------------------------|--------------------------------------------------------------------------------------------------------------------------------------------------------------------------------------------------------------------------|----------------------------------|-----|------|----------|-----|--------|-------|-------|-------|-------|-------|-------|-------|-------|-------|-------|-------|-------|-------|-------|-------|--------|---|--------|-------|
| Uncharacterized protein (Fragment)<br>OS=Bos taurus<br>GN=Bt.26029 PE=4<br>SV=1                          | tr F1MTK0 F1MTK0_BOVIN, tr F6WM07 F6WM07_ORNA_N                                                                                                                                                                          | gSEE<br>ELTD<br>Ik               | 90% | 45.2 | 53.00948 | Ref | -0.3   | -0.76 | -0.5  | -0.55 | -0.24 | -0.89 | -0.73 | 22700 | 16000 | 12700 | 16900 | 18000 | 19500 | 13000 | 14400 | 577   | 1727.9 | 3 | 0.0079 | 4.586 |
| Glycylpeptide N-tetradecanoyltransferase 1 OS=Homo sapiens GN=NMT1 PE=1 SV=2                             | 9 NMT1_HUMAN,sp P31717 NMT1_BOVIN,sp Q5RAF3 NMT1_PONAB, tr B7Z8J4 B7Z8J4_HUMAN, tr F1MZK0 F1MZK0_BOVIN, tr F7A039 F7A039_HORSE, tr Q32LK5 Q32LK5_BOVIN, tr Q5NVB6 Q5NVB6_PONAB, tr Q96HI4 Q96HI4_HUMAN, tr Q9Y465 Q9Y465 | gSET<br>DSA<br>QDQ<br>PVK        | 90% | 45.3 | 53.26627 | Ref | -0.022 | -0.36 | -0.02 | 0.016 | 0.12  | -0.2  | -0.11 | 11600 | 9920  | 8520  | 12100 | 13700 | 12900 | 10800 | 11300 | 657.3 | 1969   | 3 | 0.0244 | 12.39 |
| Putative uncharacterized protein (Fragment)<br>OS=Ailuropoda melanoleuca<br>GN=PANDA_018506<br>PE=4 SV=1 | tr D2I059 D2I059_AILME, tr E2QZ19 E2QZ19_CANFA, tr E2R4E7 E2R4E7_CAFIFA, tr F1RUM1 F1RUM1_PIG                                                                                                                            | rNPF<br>VFAP<br>TLLT<br>VAA<br>R | 90% | 43.9 | 52.03498 | Ref | 0.4    | 0.17  | 0.46  | 0.18  | 0.36  | 0.54  | 0.77  | 1160  | 1330  | 1230  | 1690  | 1530  | 1520  | 1800  | 2100  | 693.1 | 2076.2 | 3 | 0.0081 | 3.908 |

|                                                                                   |                                                                                                                                                                                                                 |                              |     |      |          |     |       |       |      |       |      |       |       |      |      |      |      |      |      |      |      |       |        |   |        |       |
|-----------------------------------------------------------------------------------|-----------------------------------------------------------------------------------------------------------------------------------------------------------------------------------------------------------------|------------------------------|-----|------|----------|-----|-------|-------|------|-------|------|-------|-------|------|------|------|------|------|------|------|------|-------|--------|---|--------|-------|
| Drebrin-like protein<br>OS=Bos taurus<br>GN=DBNL PE=2<br>SV=1                     | 2 DBNL_ BOVIN,sp  Q9UJU6  DBNL_HUMAN,tr B4DDD6 B4DDD6_HUMAN,tr B4DDP6 B4DDP6_HUMAN,t r B4DDU5 B4DDU5_HUMAN,tr B4DEM2 B4DEM2_HUMAN,tr B4DKZ4 B4DKZ4_HUMAN,tr B4DUF9 B4DUF9_HUMAN,tr B4DXL9 B4DXL9_HUMAN,tr       | aMS<br>TTSIS<br>SPQ<br>PGk   | 89% | 45.4 | 53.90648 | Ref | 0.26  | 0.58  | 0.09 | 0.085 | 0.35 | 4E-04 | 0.34  | 3880 | 4050 | 5460 | 4380 | 4810 | 5050 | 4130 | 5200 | 667.4 | 1999.1 | 3 | 0.0132 | 6.623 |
| Proteasomal<br>ubiquitin receptor<br>ADRM1 OS=Bos<br>taurus GN=ADRM1<br>PE=2 SV=1 | 6 ADRM1_BOVIN,sp Q16186 ADRM1_HUMAN,t r A6MK32 A6MK32_CALJA,t r D2HT81 D2HT81_AILME,tr E2RDP4 E2RDP4_CANFA,tr E9PEC0 E9PEC0_HUMAN,tr F7F015 F7F015_MACMU,tr F7FSU5 F7FSU5_MACMU,tr F71NM3 F71NM3_CALJA,tr F71TA | sQSA<br>AVTP<br>SSTT<br>SSTR | 89% | 42.2 | 52.72591 | Ref | 0.085 | -0.47 | 0.12 | -0.31 | 0.31 | -0.83 | 0.037 | 2120 | 1950 | 1440 | 2440 | 2000 | 2670 | 1270 | 2300 | 936.5 | 1870.9 | 2 | 0.0149 | 7.938 |

|                                                                                   |                                                                                                                                                                                                                |                    |     |      |          |     |      |       |       |       |       |       |       |      |      |      |      |      |      |      |      |       |        |   |        |       |
|-----------------------------------------------------------------------------------|----------------------------------------------------------------------------------------------------------------------------------------------------------------------------------------------------------------|--------------------|-----|------|----------|-----|------|-------|-------|-------|-------|-------|-------|------|------|------|------|------|------|------|------|-------|--------|---|--------|-------|
| Uncharacterized protein (Fragment)<br>OS=Bos taurus<br>GN=Bt.28075 PE=4<br>SV=1   | tr F1N7Q7_BOVIN                                                                                                                                                                                                | sISIG<br>YLLV<br>k | 89% | 39.9 | 48.49254 | Ref | 0.31 | -0.15 | -0.09 | -0.19 | -0.04 | -0.04 | -0.08 | 2960 | 3200 | 2510 | 2940 | 3030 | 2940 | 3070 | 2960 | 567.7 | 1700.1 | 3 | 0.0098 | 5.769 |
| Hypoxanthine-guanine phosphoribosyltransferase OS=Mus musculus GN=Hprt1 PE=1 SV=3 | 3 HPRT_MOUSE,sp P00494 HPRT_CRIGR,sp P27605 HPRT_RAT,sp Q45FY6 HPRT_PIG,sp Q64531 HPRT_MUSSP,sp Q6WIT9 HPRT_CANFA,tr A7X8X3_RABIT,tr A8D004 A8D004_FELCA,tr BOLXK8 BOLXK8_PIG,tr B1B0W8 B1B0W8_MOUSE,tr D2HA99 | tMQ<br>TLLS<br>LVk | 89% | 40.8 | 49.48994 | Ref | 0.1  | -0.63 | -0.29 | -0.62 | -0.54 | -0.65 | -0.68 | 1770 | 1650 | 1080 | 1530 | 1340 | 1240 | 1200 | 1160 | 581.4 | 1741.1 | 3 | 0.0013 | 0.738 |

|                                                                                           |                                                                                                                                                                                                                                 |                  |     |      |          |     |       |       |       |        |       |       |       |       |       |       |       |       |       |       |       |       |        |   |        |       |
|-------------------------------------------------------------------------------------------|---------------------------------------------------------------------------------------------------------------------------------------------------------------------------------------------------------------------------------|------------------|-----|------|----------|-----|-------|-------|-------|--------|-------|-------|-------|-------|-------|-------|-------|-------|-------|-------|-------|-------|--------|---|--------|-------|
| Leucine-rich repeat flightless-interacting protein 2 OS=Homo sapiens GN=LRRFIP2 PE=1 SV=1 | 8 LRRF2_ HUMAN, tr C9JSU1 C9JSU1_ HUMAN, tr E1BBW0 E1BBW0_BOVIN, tr E2RHP4 E2RHP4_CANFA, tr F6PZ86 F6PZ86_ORNAN, tr F6Q1Z8 F6Q1Z8_HORSE, tr F6YA06 F6YA06_MACMU, tr F7EW06 F7EW06_CALJA, tr F7GJ79 F7GJ79_MO NDO, tr F7IDP2 F7I | dQIQDVEGR        | 89% | 39.7 | 50.39383 | Ref | -0.76 | -0.02 | -0.68 | -0.38  | -0.54 | -0.37 | -0.67 | 29100 | 14900 | 27100 | 19200 | 26100 | 20400 | 24000 | 19200 | 682.4 | 1362.7 | 2 | 0.0122 | 8.929 |
| Ornithine aminotransferase, mitochondrial OS=Bos taurus GN=OAT PE=2 SV=1                  | sp Q3ZCF5 OAT_BOVIN, tr B0LY44 B0LY44_PIG, tr F1MYG0 F1MYG0_BOVIN, tr F7C9Y5 F7C9Y5_HORSE, tr F7HX55 F7HX55_CALJA, tr Q29591 Q29591_PIG                                                                                         | tVQGPPS SDYI FER | 89% | 41.9 | 52.66859 | Ref | 0.15  | -0.16 | 0.3   | -0.061 | 0.3   | -0.35 | 0.017 | 6970  | 6740  | 5870  | 9080  | 7790  | 8710  | 5800  | 7440  | 950.5 | 1899   | 2 | 0.0177 | 9.307 |

|                                                                                |                                                                                                                                                                                                                       |                  |     |      |          |     |      |       |       |       |       |       |      |      |      |      |      |      |      |      |      |       |        |   |        |       |
|--------------------------------------------------------------------------------|-----------------------------------------------------------------------------------------------------------------------------------------------------------------------------------------------------------------------|------------------|-----|------|----------|-----|------|-------|-------|-------|-------|-------|------|------|------|------|------|------|------|------|------|-------|--------|---|--------|-------|
| Inter-alpha-trypsin inhibitor heavy chain H2 OS=Suscrofa GN=ITIH2 PE=2 SV=1    | 8 ITIH2_PIG,sp P19823 ITIH2_HUMAN,sp P97279 ITIH2_MESAU,sp Q61703 ITIH2_MOUSE,tr A2RTY6 A2RTY6_HUMAN,tr A5D7R6 A5D7R6_BOVIN,tr B4DM79 B4DM79_HUMAN,tr D2I3D3 D2I3D3_AILME,tr D3DRR6 D3DRR6_HUMAN,tr D3ZFHS D3ZFHS_RAT | kFYNQVSTPLL      | 88% | 42.9 | 52.1755  | Ref | 0.81 | 0.38  | 0.32  | 0.27  | 0.011 | 0.91  | 0.32 | 3930 | 5990 | 4810 | 5200 | 5540 | 4030 | 7830 | 5180 | 692.1 | 2073.2 | 3 | 0.0164 | 7.884 |
| Uncharacterized protein OS=Bos taurus GN=Bt.37218 PE=4 SV=1                    | tr F1MZD9 F1MZD9_BOVIN, tr Q32L21 Q32L21_BOVIN                                                                                                                                                                        | IQPE SPFL FHV Nk | 88% | 44   | 53.42711 | Ref | 0.21 | 0.014 | 0.027 | -0.25 | 0.013 | -0.1  | 0.12 | 2530 | 2540 | 2410 | 2730 | 2470 | 2600 | 2500 | 2900 | 722.1 | 2163.2 | 3 | 0.0168 | 7.779 |
| Uncharacterized protein OS=Monodelphis domestica GN=ENSMODG000025454 PE=4 SV=1 | tr F6RKA3 F6RKA3_MONDO, tr F7HAP3 F7HAP3_CALJA                                                                                                                                                                        | rLQq VIR         | 88% | 40.4 | 50.00833 | Ref | 0.45 | 0.23  | 0.28  | -0.04 | 0.42  | -0.01 | 0.12 | 4920 | 5840 | 5430 | 6310 | 5590 | 6720 | 5190 | 5650 | 406.6 | 1216.7 | 3 | 0.0102 | 8.343 |





|                                                                  |                                                                                                                                                                                            |                                  |     |      |          |     |       |       |       |        |       |       |       |       |      |       |      |       |       |       |       |       |        |   |        |       |
|------------------------------------------------------------------|--------------------------------------------------------------------------------------------------------------------------------------------------------------------------------------------|----------------------------------|-----|------|----------|-----|-------|-------|-------|--------|-------|-------|-------|-------|------|-------|------|-------|-------|-------|-------|-------|--------|---|--------|-------|
| Phosphoglucomutase-1 OS=Bos taurus GN=PGM1 PE=2 SV=1             | sp Q08DP0 PGM1_BOVIN, tr A6QPB5 A6QPB5_BOVIN, tr D2H7H6 D2H7H6_AILME, tr F1MJS4 F1MJS4_BOVIN, tr F1N1X7 F1N1X7_BOVIN, tr F1PUL4 F1PUL4_CANFA, tr F1S814 F1S814_PIG, tr F6X8Q2 F6X8Q2_HORSE | tGEH<br>DFG<br>AAF<br>DGD<br>GDR | 87% | 36.2 | 46.1764  | Ref | -0.36 | -0.05 | -0.74 | -0.098 | -0.33 | -0.02 | -0.32 | 14600 | 9900 | 13300 | 9210 | 15900 | 11800 | 15300 | 12300 | 657.6 | 1969.9 | 3 | 0.0208 | 10.53 |
| Palmitoyl-protein thioesterase 1 OS=Bos taurus GN=PPT1 PE=1 SV=1 | sp P45478 PPT1_BOVIN, tr F1MSA1 F1MSA1_BOVIN                                                                                                                                               | kIPGI<br>HVLS<br>LEIG            | 87% | 33.3 | 45.55082 | Ref | 0.17  | -0.3  | -0.07 | -0.19  | -0.04 | -0.32 | -0.17 | 1340  | 1310 | 1030  | 1350 | 1370  | 1320  | 1140  | 1250  | 604.9 | 2415.5 | 4 | 0.038  | 15.71 |

|                                                                              |                                                                                                                                                                                                                              |                 |     |      |          |     |       |       |       |       |       |       |       |      |      |      |      |      |      |      |      |       |        |   |        |       |
|------------------------------------------------------------------------------|------------------------------------------------------------------------------------------------------------------------------------------------------------------------------------------------------------------------------|-----------------|-----|------|----------|-----|-------|-------|-------|-------|-------|-------|-------|------|------|------|------|------|------|------|------|-------|--------|---|--------|-------|
| Lamin-B1 OS=Mus musculus<br>GN=Lmb1 PE=1<br>SV=3                             | 3 LMNB1_MOUSE,sp P20700 LMNB1_HUMAN,sp P70615 LMNB1_RAT, tr A7YY47 A7YY47_BOVIN, tr B4DZT3 B4DZT3_HUMAN, tr D2H8G0 D2H8G0_AILME, tr E1B8N6 E1B8N6_BOVIN, tr E1BCJ4 E1BCJ4_BOVIN, tr E9PBF6 E9PBF6_HUMAN, tr F1MG04 F1MG04_MR | IAQALHE         | 87% | 41.2 | 51.51685 | Ref | -0.16 | -0.21 | -0.32 | -0.33 | -0.39 | -0.22 | -0.29 | 4450 | 3460 | 3610 | 3770 | 4140 | 3460 | 4070 | 3840 | 458.3 | 1371.8 | 3 | 0.0085 | 6.177 |
| ATP synthase subunit g, mitochondrial OS=Bos taurus<br>GN=ATP5L PE=1<br>SV=3 | sp Q28852 ATP5L_BOVIN, tr D2GWW0 D2GWW0_AILME, tr D2HYH1 D2HYH1_AILME, tr E1BCK5 E1BCK5_BOVIN, tr F7BYD1 F7BYD1_HO_RSE                                                                                                       | aPALVNA<br>AVTY | 86% | 40.9 | 51.46885 | Ref | 0.44  | 0.24  | 0.35  | 0.16  | 0.32  | 0.33  | 0.3   | 3240 | 3820 | 3590 | 4380 | 4210 | 4110 | 4330 | 4210 | 722.8 | 2165.3 | 3 | 0.0095 | 4.388 |

|                                                                                           |                                                                                                                                                                                                                                                                            |                               |          |            |             |                 |            |              |              |              |              |              |              |             |              |              |              |              |               |              |              |               |              |               |          |               |              |
|-------------------------------------------------------------------------------------------|----------------------------------------------------------------------------------------------------------------------------------------------------------------------------------------------------------------------------------------------------------------------------|-------------------------------|----------|------------|-------------|-----------------|------------|--------------|--------------|--------------|--------------|--------------|--------------|-------------|--------------|--------------|--------------|--------------|---------------|--------------|--------------|---------------|--------------|---------------|----------|---------------|--------------|
| <p>Tubulin-specific chaperone A<br/>OS=Homo sapiens<br/>GN=TBCA PE=1<br/>SV=3</p>         | <p>7 TBCA_HUMAN,sp P48427 TBCA_BOVIN,sp P48428 TBCA_MOUSE,sp P80584 TBCA_RABBIT,sp Q6PEC1 TBCA_RAT,transcript B4DT30 B4DT30_HUMAN,transcript E5RIW3 E5RIW3_HUMAN,transcript E5RJD8 E5RJD8_HUMAN,transcript F1M825 F1M825_RAT,transcript F1S2G3 F1S2G3_PIG,transcript </p>  | <p>qAEI<br/>LQES</p>          | <p>R</p> | <p>86%</p> | <p>39.6</p> | <p>52.0831</p>  | <p>Ref</p> | <p>-0.23</p> | <p>0.24</p>  | <p>0.31</p>  | <p>0.43</p>  | <p>0.7</p>   | <p>-0.11</p> | <p>0.53</p> | <p>69000</p> | <p>51000</p> | <p>76900</p> | <p>90400</p> | <p>109000</p> | <p>1E+05</p> | <p>68200</p> | <p>105000</p> | <p>689.4</p> | <p>1376.7</p> | <p>2</p> | <p>0.0089</p> | <p>6.457</p> |
| <p>Poly(rC)-binding protein 1<br/>OS=Oryctolagus cuniculus<br/>GN=PCBP1 PE=2<br/>SV=1</p> | <p>8 PCBP1_RABBIT,sp P60335 PCBP1_MOUSE,sp Q15365 PCBP1_HUMAN,sp Q5E9A3 PCBP1_BOVIN,transcript D2H0E6 D2H0E6_AILME,transcript D3ZS68 D3ZS68_RAT,transcript E2QT85 E2QT85_CANFA,transcript F6S7P4 F6S7P4_CALJAr F6V8I5 F6V8I5_HORSE,transcript F7DX65 F7DX65_CALJAr Q29</p> | <p>iITLT<br/>GPT<br/>NAIF</p> | <p>k</p> | <p>86%</p> | <p>38.6</p> | <p>49.67188</p> | <p>Ref</p> | <p>0.23</p>  | <p>-0.89</p> | <p>-0.57</p> | <p>-0.82</p> | <p>-0.73</p> | <p>-0.89</p> | <p>-1</p>   | <p>4910</p>  | <p>5020</p>  | <p>2510</p>  | <p>3500</p>  | <p>3240</p>   | <p>3000</p>  | <p>2820</p>  | <p>2570</p>   | <p>666.4</p> | <p>1996.2</p> | <p>3</p> | <p>0.0124</p> | <p>6.2</p>   |

|                                                                                                    |                                                                                                                                                                                                                                 |                   |     |      |         |     |      |       |      |       |      |       |      |       |        |       |        |        |       |       |        |       |        |   |        |       |
|----------------------------------------------------------------------------------------------------|---------------------------------------------------------------------------------------------------------------------------------------------------------------------------------------------------------------------------------|-------------------|-----|------|---------|-----|------|-------|------|-------|------|-------|------|-------|--------|-------|--------|--------|-------|-------|--------|-------|--------|---|--------|-------|
| WW domain-containing transcription regulator protein 1<br>OS=Mus musculus<br>GN=Wwtr1 PE=1<br>SV=2 | 5 WWTR1_MOUSE,sp Q9GZV5 WWT R1_HUMAN, tr C9J038 C9J038_HUMAN, tr C9JQ58 C9JQ8_HUMAN, tr C9JR84 C9JR84_HUMAN, tr E1BP N1 E1BP N1_BOVIN, tr E2R3R3 E2R3R3_CANFA, tr F1SJN7 F1SJN7_PIG, tr F1SJP0 F1SJP0_PIG, tr F6XXC8 F6XXC8_M   | IAGG<br>AQH<br>VR | 85% | 40   | 51.2739 | Ref | 0.17 | -0.12 | 0.51 | 0.016 | 0.6  | -0.36 | 0.37 | 1E+05 | 113000 | 1E+05 | 175000 | 137000 | 2E+05 | 95800 | 158000 | 404.9 | 1211.7 | 3 | 0.0086 | 7.118 |
| Centrosomal protein of 170 kDa<br>OS=Homo sapiens<br>GN=CEP170 PE=1<br>SV=1                        | 79 CE170_HUMAN, sp Q6A065 CE170_MOUSE, tr B1ARM6 B1ARM6_HUMAN, tr B4DL23 B4DL23_HUMAN, tr B4DS35 B4DS35_HUMAN, tr D21453 D21453_ALME, tr D3ZET9 D3ZET9_RAT, tr E1BGI2 E1BGI2_BOVIN, tr E2R695 E2R695_CANFA, tr E7ES90 E7ES90_HU | gGH<br>GVP<br>HGK | 85% | 38.2 | 51.5911 | Ref | 0.3  | 0.28  | 0.33 | -0.11 | 0.43 | -0.21 | 0.23 | 10000 | 10700  | 11400 | 13300  | 10800  | 13700 | 9190  | 12400  | 364.2 | 1452.8 | 4 | 0.0039 | 2.698 |

|                                                                                       |                                                                                                                                                                                                                                                                                                                                 |                     |     |      |          |     |      |       |       |       |       |       |       |      |      |      |      |      |      |      |      |       |        |   |        |       |
|---------------------------------------------------------------------------------------|---------------------------------------------------------------------------------------------------------------------------------------------------------------------------------------------------------------------------------------------------------------------------------------------------------------------------------|---------------------|-----|------|----------|-----|------|-------|-------|-------|-------|-------|-------|------|------|------|------|------|------|------|------|-------|--------|---|--------|-------|
| Proteasome subunit<br>beta type-2<br>OS=Rattus<br>norvegicus<br>GN=Psmb2 PE=1<br>SV=1 | 7 PSB2_R<br>AT,sp P49<br>721 PSB2<br>_HUMAN,<br>sp Q5E9K<br>0 PSB2_B<br>OVIN,sp <br>Q9R1P3 P<br>SB2_MOU<br>SE,tr A2A<br>882 A2A8<br>82_MOUS<br>E,tr B7Z4<br>78 B7Z47<br>8_HUMA<br>N,tr E2Q<br>W34 E2Q<br>W34_CAN<br>FA,tr F1P<br>CR8 F1PC<br>R8_CANF<br>A,tr F6XJL<br>9 F6XJL9_<br>MACMU,t<br>r F7CSY1 <br>F7CSY1_O<br>RNASN,tr | fiLNL<br>PTFS<br>VR | 85% | 39.1 | 51.87893 | Ref | 0.62 | -0.79 | -0.12 | -0.5  | -0.14 | -0.95 | -0.21 | 513  | 683  | 281  | 499  | 422  | 474  | 282  | 469  | 806   | 1609.9 | 2 | 0.0083 | 5.135 |
| Proteasome subunit<br>alpha type-4<br>OS=Homo sapiens<br>GN=PSMA4 PE=1<br>SV=1        | 9 PSA4_H<br>UMAN,sp<br> Q3ZCK9 <br>PSA4_BO<br>VIN,sp Q<br>4R932 PS<br>A4_MACF<br>A,tr B2RD<br>G0 B2RD<br>G0_HUM<br>AN,tr D2<br>HL18 D2<br>HL18_AIL<br>ME,tr E2<br>RDF5 E2R<br>DF5_CAN<br>FA,tr F1P<br>JW0 F1PJ<br>W0_CANF<br>A,tr F2Z5<br>28 F2Z52<br>8_PIG,tr <br>F6QQJ2 F<br>6QQJ2_C<br>ALJA,tr F<br>6Z688 F6<br>Z688_HO      | sALA<br>LAik        | 85% | 35.9 | 47.36381 | Ref | 0.51 | -0.15 | 0.009 | -0.32 | -0.15 | -0.45 | -0.36 | 5270 | 6500 | 4490 | 5610 | 4940 | 4830 | 4110 | 4340 | 465.6 | 1393.9 | 3 | 0.0057 | 4.103 |

|                                                                                                           |                                                                                                                                                                                                                                                                                                                                                          |                               |            |             |                 |            |               |              |              |              |             |              |              |             |             |             |             |             |             |             |             |              |             |          |               |              |
|-----------------------------------------------------------------------------------------------------------|----------------------------------------------------------------------------------------------------------------------------------------------------------------------------------------------------------------------------------------------------------------------------------------------------------------------------------------------------------|-------------------------------|------------|-------------|-----------------|------------|---------------|--------------|--------------|--------------|-------------|--------------|--------------|-------------|-------------|-------------|-------------|-------------|-------------|-------------|-------------|--------------|-------------|----------|---------------|--------------|
| <p>Microtubule-associated tumor suppressor candidate 2 homolog OS=Mus musculus<br/>GN=Mtus2 PE=2 SV=1</p> | <p>sp Q3UH<br/>D3 MTUS<br/>2_MOUSE<br/>,sp Q5JR5<br/>9 MTUS2<br/>_HUMAN,<br/>tr D3Z9L7<br/> D3Z9L7_<br/>RAT,tr D3<br/>ZTQ0 D3Z<br/>TQ0_RAT,<br/>tr F1PPX5<br/> F1PPX5_<br/>CANFA,tr <br/>F1RSU2 F<br/>1RSU2_PI<br/>G,tr F7FP<br/>R1 F7FPR<br/>1_CALJA,t<br/>r F7GDB7<br/> F7GDB7_<br/>ORNAN</p>                                                          | <p>rSLLP<br/>APk</p>          | <p>85%</p> | <p>32.2</p> | <p>43.84927</p> | <p>Ref</p> | <p>-0.56</p>  | <p>0.23</p>  | <p>-0.37</p> | <p>0.16</p>  | <p>0.17</p> | <p>0.31</p>  | <p>0.35</p>  | <p>6370</p> | <p>3760</p> | <p>7030</p> | <p>5200</p> | <p>8280</p> | <p>7290</p> | <p>8400</p> | <p>8590</p> | <p>497.3</p> | <p>1489</p> | <p>3</p> | <p>0.0047</p> | <p>3.185</p> |
| <p>Prostaglandin E synthase 3 OS=Rattus norvegicus<br/>GN=Ptges3 PE=1 SV=2</p>                            | <p>8 TEBP_R<br/>AT,sp Q1<br/>5185 TEB<br/>P_HUMA<br/>N,sp Q3Z<br/>BF7 TEBP<br/>_BOVIN,s<br/>p Q5NVM<br/>4 TEBP_P<br/>ONAB,sp <br/>Q6PWL5 <br/>TEBP_MA<br/>CFA,sp Q<br/>9ROQ7 TE<br/>BP_MOUS<br/>E,tr B2GV<br/>92 B2GV9<br/>2_RAT,tr <br/>B3KUY2 B<br/>3KUY2_H<br/>UMAN,tr <br/>B4DHP2 <br/>B4DHP2_<br/>HUMAN,t<br/>r B4DP11<br/> B4DP11_<br/>HUMAN,t</p> | <p>ITFSc<br/>LGGs<br/>DNF</p> | <p>84%</p> | <p>41.5</p> | <p>53.25382</p> | <p>Ref</p> | <p>-0.056</p> | <p>-0.31</p> | <p>-0.03</p> | <p>-0.18</p> | <p>0.15</p> | <p>-0.56</p> | <p>0.064</p> | <p>5450</p> | <p>4560</p> | <p>4150</p> | <p>5670</p> | <p>5620</p> | <p>6140</p> | <p>3920</p> | <p>6020</p> | <p>681.7</p> | <p>2042</p> | <p>3</p> | <p>0.0169</p> | <p>8.294</p> |

|                                                                     |                                                                                                                                                                                                                    |                         |     |      |          |     |       |       |       |       |      |       |      |       |       |       |       |       |       |       |       |       |        |   |        |       |
|---------------------------------------------------------------------|--------------------------------------------------------------------------------------------------------------------------------------------------------------------------------------------------------------------|-------------------------|-----|------|----------|-----|-------|-------|-------|-------|------|-------|------|-------|-------|-------|-------|-------|-------|-------|-------|-------|--------|---|--------|-------|
| 40S ribosomal protein S6<br>OS=Homo sapiens<br>GN=RPS6 PE=1<br>SV=1 | 3 RS6_HUMAN,sp P62754 RS6_MOUSE,sp P62755 RS6_RAT,sp Q4R4K6 RS6_MACFAS,sp Q5E995 RS6_BOVIN,tr A1XQU8 A1XQU8_PIG,tr A2A3R5 A2A3R5_HUMAN,tr A2A3R6 A2A3R6_HUMAN,tr A5JSR8 A5JSR8_CAPHI,tr C3PT39 C3PT39_DASNO,tr D1M | qGVL<br>THG<br>R        | 84% | 38.6 | 50.47532 | Ref | 0.3   | 0.24  | 0.17  | -0.18 | 0.25 | -0.28 | 0.14 | 26800 | 28700 | 29800 | 31800 | 27600 | 32400 | 23500 | 31100 | 391.2 | 1170.7 | 3 | 0.0056 | 4.815 |
| Uncharacterized protein OS=Bos taurus GN=Bt.58604<br>PE=4 SV=1      | tr F1MYX9 F1MYX9_BOVIN, tr F6ZDJ2 F6ZDJ2_HORSE, tr F7BSA8 F7BSA8_HORSE                                                                                                                                             | nLQ<br>QEA<br>DELS<br>R | 84% | 38.6 | 51.72177 | Ref | -0.34 | -0.45 | -0.06 | -0.19 | 0.41 | -0.76 | 0.08 | 18700 | 12900 | 13000 | 19000 | 19100 | 25300 | 11700 | 20900 | 803.9 | 1605.8 | 2 | 0.0128 | 7.967 |
| Transmembrane protein 109 OS=Bos taurus<br>GN=TMEM109 PE=2<br>SV=1  | tr A7E3R8 A7E3R8_BOVIN, tr Q29RH9 Q29RH9_BOVIN                                                                                                                                                                     | dFVT<br>PGQ<br>QK       | 84% | 39.6 | 52.83007 | Ref | -0.25 | -0.28 | 0.42  | -0.2  | 0.73 | -0.48 | 0.32 | 13300 | 9670  | 10300 | 18800 | 13500 | 22400 | 10100 | 17600 | 814.5 | 1626.9 | 2 | 0.0159 | 9.738 |



|                                                                                     |                                                                                                                                                                                                                    |                   |     |      |          |     |       |      |       |        |       |       |       |      |      |      |      |      |      |      |      |       |        |   |        |       |
|-------------------------------------------------------------------------------------|--------------------------------------------------------------------------------------------------------------------------------------------------------------------------------------------------------------------|-------------------|-----|------|----------|-----|-------|------|-------|--------|-------|-------|-------|------|------|------|------|------|------|------|------|-------|--------|---|--------|-------|
| Uncharacterized protein OS=Bos taurus GN=Bt.86622 PE=4 SV=1                         | tr E1BDB0 E1BDB0_BOVIN                                                                                                                                                                                             | gDAE<br>ETA<br>QR | 84% | 36.3 | 49.53745 | Ref | -0.13 | 0.13 | -0.03 | -0.1   | 0.055 | -0.28 | 0.045 | 1820 | 1440 | 1880 | 1890 | 1970 | 1920 | 1590 | 1980 | 640.8 | 1279.6 | 2 | 0.0088 | 6.846 |
| Coiled-coil domain-containing protein 47 OS=Macaca fascicularis GN=CCDC47 PE=2 SV=1 | 4 CCD47_MACFA,sp Q3ZC50 CCD47_BOVIN,sp Q5RCL4 CCD47_PO NAB,sp Q5U2X6 CCD47_RAT,sp Q96A33 CCD47_HUMAN,sp Q9D024 CC47_MOUSE,tr E2RBH4 E2RBH4_CANFA,tr F1MG07 F1MG07_BOVIN,tr F6R7Z7 F6R7Z7_MONDO,tr F6S804 F6S804_OR | rLEE<br>AALR      | 84% | 38.8 | 50.86239 | Ref | 0.29  | 0.53 | 0.16  | -0.034 | 0.2   | -0.13 | 0.11  | 6930 | 7360 | 9420 | 8170 | 7900 | 8120 | 6720 | 7870 | 421.3 | 1260.7 | 3 | 0.0118 | 9.38  |

|                                                                                             |                                                                                                                                                                                                                                      |                 |     |      |          |     |      |       |       |        |       |       |       |      |      |      |      |      |      |      |      |       |        |   |        |       |
|---------------------------------------------------------------------------------------------|--------------------------------------------------------------------------------------------------------------------------------------------------------------------------------------------------------------------------------------|-----------------|-----|------|----------|-----|------|-------|-------|--------|-------|-------|-------|------|------|------|------|------|------|------|------|-------|--------|---|--------|-------|
| RNA-binding motif, single-stranded-interacting protein 1 OS=Homo sapiens GN=RBMS1 PE=1 SV=3 | 8 RBMS1_HUMAN,sp Q3ZBP3 RBMS1_BOVIN,sp Q5PQP1 RBMS1_RAT,sp Q5RBD3 RBMS3_PONAB,sp Q6XE24 RBMS3_HUMAN,sp Q8BWL5 RBMS3_MOUSE,sp Q91W59 RBMS1_MOUSE,trans A8K9S4 A8K9S4_HUMAN,trans B4DN88 B4DN88_HUMAN,trans B4E2S3                     | gYGFVDFDSPAAAQk | 84% | 42.1 | 54.16176 | Ref | -0.1 | -0.42 | -0.07 | -0.032 | 0.054 | -0.34 | -0.14 | 3350 | 2710 | 2350 | 3370 | 3820 | 3540 | 2820 | 3200 | 727.7 | 2180.1 | 3 | 0.0179 | 8.195 |
| UPF0587 protein C1orf123 homolog OS=Bos taurus PE=2 SV=1                                    | 6 CA123_BOVIN,sp Q498R7 CA123_RAT,sp Q8BHG2 CA123_MOUSE,sp Q9NWV4 CA123_HUMAN,trans A2A8E1 A2A8E1_MOUSE,trans A2A8E2 A2A8E2_MOUSE,trans A2A8E4 A2A8E4_MOUSE,trans B7ZC71 B7ZC71_MOUSE,trans B7ZC72 B7ZC72_MOUSE,trans D2H2F1 D2H2F1_ | IMDSVALk        | 84% | 38.6 | 50.74425 | Ref | 0.22 | -0.08 | -0.18 | -0.11  | -0.04 | -0.19 | -0.4  | 4630 | 4690 | 4130 | 4320 | 5010 | 4590 | 4310 | 3720 | 495.6 | 1483.9 | 3 | 0.0056 | 3.74  |

|                                                                              |                                                                                                                                                                                                                 |                         |     |      |          |     |       |       |       |       |       |       |       |       |       |       |       |       |       |       |       |       |        |   |        |       |
|------------------------------------------------------------------------------|-----------------------------------------------------------------------------------------------------------------------------------------------------------------------------------------------------------------|-------------------------|-----|------|----------|-----|-------|-------|-------|-------|-------|-------|-------|-------|-------|-------|-------|-------|-------|-------|-------|-------|--------|---|--------|-------|
| Uncharacterized protein (Fragment) OS=Callithrix jacchus GN=AHNAK2 PE=4 SV=1 | tr F7GZ18 F7GZ18_CALJA,tr F7H4K7 F7H4K7_CALJA                                                                                                                                                                   | mPS<br>FGVS<br>APSk     | 84% | 40.8 | 52.92502 | Ref | -0.17 | -0.76 | -0.34 | -0.28 | -0.14 | -0.76 | -0.23 | 22400 | 17300 | 12400 | 18700 | 21500 | 20600 | 14100 | 20200 | 572.7 | 1715   | 3 | 0.003  | 1.775 |
| Uncharacterized protein OS=Bos taurus GN=ENG PE=4 SV=1                       | tr E1BG97 E1BG97_BOVIN,tr E1BJ42 E1BJ42_BOVIN,tr F6W046 F6W046_HORSE,tr Q1RMV1 Q1RMV1_BOVIN,tr Q5R771 Q5R771_PO_NAB                                                                                             | IEGV<br>AGH<br>k        | 84% | 38.4 | 50.56608 | Ref | 0.73  | 0.026 | -0.04 | -0.12 | 0.23  | 0.083 | 0.23  | 6660  | 9600  | 6400  | 6860  | 7160  | 7960  | 7510  | 8260  | 473.6 | 1417.8 | 3 | 0.004  | 2.834 |
| Gelsolin OS=Homo sapiens GN=GSN PE=1 SV=1                                    | 6 GELS_HUMAN,sp P20305 GELS_PIG,sp Q28372 GELS_HORSE,sp Q3SX14 GELS_BOVIN,tr A2A418 A2A418_HUMAN,tr B3KS49 B3KS49_HUMAN,tr B72X4 B72X4_HUMAN,tr B72373 B72373_HUMAN,tr B724U6 B724U6_HUMAN,tr B7Z5V1 B7Z5V1_HUM | eGG<br>QTA<br>PAST<br>R | 83% | 37.6 | 51.00619 | Ref | 0.53  | 0.19  | 0.26  | 0.028 | 0.048 | 0.45  | -0.28 | 2720  | 3400  | 2930  | 3430  | 3230  | 2860  | 3950  | 2360  | 689.9 | 1377.7 | 2 | 0.0083 | 6.006 |

|                                                                                 |                                                                                                                                                                                                                                           |                                        |     |      |          |     |       |       |       |       |       |       |       |      |      |      |      |      |      |      |      |       |        |   |        |       |
|---------------------------------------------------------------------------------|-------------------------------------------------------------------------------------------------------------------------------------------------------------------------------------------------------------------------------------------|----------------------------------------|-----|------|----------|-----|-------|-------|-------|-------|-------|-------|-------|------|------|------|------|------|------|------|------|-------|--------|---|--------|-------|
| Peptidyl-prolyl cis-trans isomerase<br>FKBP9 OS=Homo sapiens GN=FKBP9 PE=1 SV=2 | 2 FKBP9_HUMAN,sp Q2KJC8 FKBP9_BOVIN,sp Q66H94 FKBP9_RAT,sp Q9Z247 FKBP9_MOUSE,trans A1L517 A1L517_BOVIN,trans B3KQQ0 B3KQQ0_HUMAN,trans B7Z230 B7Z230_HUMAN,trans B7Z6H3 B7Z6H3_HUMAN,trans D2HI36 D2HI36_AILME,trans F1Q1F5 F1Q1F5_C     | gLLG<br>McV<br>Gek                     | 83% | 40.5 | 52.7622  | Ref | 0.15  | 0.22  | -0.36 | -0.24 | -0.38 | 0.26  | -0.5  | 4550 | 4390 | 5000 | 3770 | 4510 | 3560 | 5790 | 3390 | 554.3 | 1659.9 | 3 | 0.0041 | 2.462 |
| Palmdelphin<br>OS=Sus scrofa GN=PALMD PE=2 SV=1                                 | V9 PALMD_PIG,sp Q3MHH7 PALMD_BOVIN,sp Q9NP74 PALMD_HUMAN,trans D2HFF2 D2HFF2_AILME,trans F1MZD8 F1MZD8_BOVIN,trans F1PAP4 F1PAP4_CANFA,trans F1S554 F1S554_PIG,trans F6QXT0 F6QXT0_CALJA,trans F6TV06 F6TV06_HORSE,trans F7GRL6 F7GRL6_MA | qNQ<br>QDQ<br>HQI<br>QVLE<br>QSIL<br>R | 83% | 42.7 | 54.90896 | Ref | 0.062 | -0.64 | -0.11 | -0.45 | 0.16  | -0.65 | -0.01 | 2320 | 2100 | 1400 | 2270 | 1980 | 2640 | 1570 | 2430 | 837.1 | 2508.3 | 3 | 0.0193 | 7.707 |

|                                                                                                                                |                                                                                                                                                                                                                                                                                                                                  |                                            |            |             |                 |            |              |              |             |              |             |              |            |            |            |            |            |            |            |            |            |              |               |          |              |              |
|--------------------------------------------------------------------------------------------------------------------------------|----------------------------------------------------------------------------------------------------------------------------------------------------------------------------------------------------------------------------------------------------------------------------------------------------------------------------------|--------------------------------------------|------------|-------------|-----------------|------------|--------------|--------------|-------------|--------------|-------------|--------------|------------|------------|------------|------------|------------|------------|------------|------------|------------|--------------|---------------|----------|--------------|--------------|
| <p>Catenin alpha-1<br/>OS=Mus musculus<br/>GN=Ctnna1 PE=1<br/>SV=1</p>                                                         | <p>1 CTNA1_ MOUSE,s<br/>p P35221<br/> CTNA1_ HUMAN,s<br/>p Q3MH<br/>M6 CTNA<br/>1_BOVIN,<br/>sp Q59I7<br/>2 CTNA1_ RABBIT,tr <br/>B3KSR8 B<br/>3KSR8_H<br/>UMAN,tr <br/>B4DKT9 B<br/>4DKT9_H<br/>UMAN,tr <br/>B4DU00 <br/>B4DU00_ HUMAN,t<br/>r B4E2G8<br/> B4E2G8_ HUMAN,t<br/>r E2R9S7<br/> E2R9S7_ CANFA,tr <br/>E5RGY7 E</p> | <p>kHV<br/>NPV<br/>QALS<br/>EFk</p>        | <p>83%</p> | <p>39.4</p> | <p>51.72197</p> | <p>Ref</p> | <p>0.046</p> | <p>-0.28</p> | <p>0.31</p> | <p>0.18</p>  | <p>0.35</p> | <p>-0.56</p> | <p>0.3</p> | <p>488</p> | <p>438</p> | <p>380</p> | <p>642</p> | <p>643</p> | <p>633</p> | <p>353</p> | <p>636</p> | <p>803.8</p> | <p>2408.4</p> | <p>3</p> | <p>0.031</p> | <p>12.86</p> |
| <p>Putative<br/>uncharacterized<br/>protein (Fragment)<br/>OS=Ailuropoda<br/>melanoleuca<br/>GN=PANDA_014444<br/>PE=3 SV=1</p> | <p>tr D2HR5<br/>6 D2HR5<br/>6_AILME,t<br/>r F1RMQ<br/>4 F1RMQ<br/>4_PIG,tr <br/>F6R4H9 F<br/>6R4H9_H<br/>ORSE,tr Q<br/>0II53 Q0II<br/>53_BOVIN</p>                                                                                                                                                                               | <p>rDSN<br/>LTL<br/>NQLL<br/>QGL<br/>R</p> | <p>83%</p> | <p>39.8</p> | <p>52.22587</p> | <p>Ref</p> | <p>0.37</p>  | <p>0.39</p>  | <p>0.47</p> | <p>0.086</p> | <p>0.22</p> | <p>0.2</p>   | <p>0.2</p> | <p>254</p> | <p>285</p> | <p>313</p> | <p>373</p> | <p>314</p> | <p>302</p> | <p>310</p> | <p>307</p> | <p>720.1</p> | <p>2157.3</p> | <p>3</p> | <p>#####</p> | <p>0.188</p> |

|                                                                                |                                                                                                                                                                                                                                |                     |     |      |          |     |       |       |       |        |       |      |       |      |      |      |      |      |      |      |      |       |        |   |        |       |
|--------------------------------------------------------------------------------|--------------------------------------------------------------------------------------------------------------------------------------------------------------------------------------------------------------------------------|---------------------|-----|------|----------|-----|-------|-------|-------|--------|-------|------|-------|------|------|------|------|------|------|------|------|-------|--------|---|--------|-------|
| Peptidyl-prolyl cis-trans isomerase<br>FKBP7 OS=Pongoabelii GN=FKBP7 PE=2 SV=1 | 2 FKBP7_PONAB,sp Q9Y680 FKBP7_HUMAN, tr A6QPJ6 A6QPJ6_BOVIN, tr B2CR55 B2CR55_PIG, tr B4DRE2 B4DRE2_HUMAN, tr D2HAF2 D2HAF2_AILME, tr D3DPF8 D3DPF8_HUMAN, tr F1P8W6 F1P8W6_CANFA, tr F1PQ96 F1PQ96_CANFA, tr F1PQ98 F1PQ98_CA | wFVL<br>GVG<br>QVIK | 83% | 37   | 49.45729 | Ref | -0.29 | 0.17  | -0.52 | -0.037 | -0.34 | 0.29 | -0.66 | 1630 | 1160 | 1730 | 1200 | 1850 | 1310 | 2110 | 1090 | 618.7 | 1853.1 | 3 | 0.0124 | 6.702 |
| DNA-binding protein RFX5 OS=Homo sapiens GN=RFX5 PE=1 SV=1                     | 2 RFX5_HUMAN, tr A2A3Q3 A2A3Q3_HUMAN, tr A2A3Q4 A2A3Q4_HUMAN, tr A9X1A1 A9X1A1_PAPAN, tr B0KWC2 B0KWC2_CALJA, tr B1MTG8 B1MTG8_CALMO, tr B2KI65 B2KI65_RHIFE, tr B2R5R9 B2R5R9_HUMAN, tr B3EX62 B3EX62_SO RAR, tr B4UT10 B4    | fLLQ<br>QHLI<br>SAR | 83% | 38.3 | 50.82512 | Ref | 0.3   | -0.06 | 0.13  | -0.16  | -0.01 | -0.1 | 0.21  | 1590 | 1700 | 1430 | 1850 | 1670 | 1610 | 1580 | 1950 | 544   | 1629   | 3 | 0.0013 | 0.778 |

|                                                                                               |                                                                                                                                                                                                                                                                                                                                                                |                                      |            |             |                 |            |             |              |              |              |              |              |              |              |              |              |              |              |              |              |              |              |               |          |               |              |
|-----------------------------------------------------------------------------------------------|----------------------------------------------------------------------------------------------------------------------------------------------------------------------------------------------------------------------------------------------------------------------------------------------------------------------------------------------------------------|--------------------------------------|------------|-------------|-----------------|------------|-------------|--------------|--------------|--------------|--------------|--------------|--------------|--------------|--------------|--------------|--------------|--------------|--------------|--------------|--------------|--------------|---------------|----------|---------------|--------------|
| <p>26S protease<br/>regulatory subunit<br/>10B OS=Homo<br/>sapiens GN=PSMC6<br/>PE=1 SV=1</p> | <p>3 PRS10_<br/>HUMAN,s<br/>p P62334<br/> PRS10_<br/>MOUSE,s<br/>p P62335<br/> PRS10_S<br/>PETR,sp <br/>Q2KIW6 <br/>PRS10_B<br/>OVIN,tr A<br/>6MK92 A<br/>6MK92_C<br/>ALJA,tr D<br/>2I273 D2I<br/>273_AILM<br/>E,tr F1ML<br/>V1 F1ML<br/>V1_BOVI<br/>N,tr F1PG<br/>58 F1PG5<br/>8_CANFA,<br/>tr F1SFE6<br/> F1SFE6_<br/>PIG,tr F6<br/>RR88 F6R<br/>R88_ORN</p> | <p>iHAG<br/>PITk</p>                 | <p>82%</p> | <p>36.5</p> | <p>49.2508</p>  | <p>Ref</p> | <p>0.16</p> | <p>-0.01</p> | <p>-0.08</p> | <p>-0.23</p> | <p>-0.05</p> | <p>-0.21</p> | <p>-0.09</p> | <p>20600</p> | <p>20000</p> | <p>19300</p> | <p>20600</p> | <p>20600</p> | <p>20300</p> | <p>18900</p> | <p>20500</p> | <p>482.3</p> | <p>1443.9</p> | <p>3</p> | <p>0.0022</p> | <p>1.539</p> |
| <p>High mobility group<br/>protein B1<br/>OS=Papio anubis<br/>GN=HMGB1 PE=3<br/>SV=1</p>      | <p>4 HMGB1<br/>_PAPAN,s<br/>p B0CM9<br/>9 HMGB1<br/>_CALJA,sp<br/> B1MTB0<br/> HMGB1_<br/>CALMO,sp<br/> P09429 <br/>HMGB1_<br/>HUMAN,s<br/>p P10103<br/> HMGB1_<br/>BOVIN,sp<br/> P12682 <br/>HMGB1_P<br/>IG,sp P63<br/>158 HMG<br/>B1_MOUS<br/>E,sp P631<br/>59 HMGB<br/>1_RAT,sp<br/> Q08IE6 <br/>HMGB1_<br/>HORSE,sp<br/> Q4R844 <br/>HMGB1_</p>            | <p>kHP<br/>DAS<br/>VNFS<br/>EFSK</p> | <p>82%</p> | <p>40</p>   | <p>54.78978</p> | <p>Ref</p> | <p>0.14</p> | <p>0.11</p>  | <p>0.31</p>  | <p>0.037</p> | <p>0.41</p>  | <p>0.44</p>  | <p>0.63</p>  | <p>20000</p> | <p>19200</p> | <p>20400</p> | <p>26200</p> | <p>23900</p> | <p>27000</p> | <p>28800</p> | <p>32600</p> | <p>627.1</p> | <p>2504.4</p> | <p>4</p> | <p>0.0289</p> | <p>11.55</p> |

|                                                                        |                                                                                                                                                                                                                                                                                                                          |                          |     |      |          |     |      |       |       |        |      |       |       |       |       |       |       |       |       |      |       |       |        |   |        |       |
|------------------------------------------------------------------------|--------------------------------------------------------------------------------------------------------------------------------------------------------------------------------------------------------------------------------------------------------------------------------------------------------------------------|--------------------------|-----|------|----------|-----|------|-------|-------|--------|------|-------|-------|-------|-------|-------|-------|-------|-------|------|-------|-------|--------|---|--------|-------|
| Protein LZIC<br>OS=Homo sapiens<br>GN=LZIC PE=1 SV=1                   | sp Q8WZ<br>A0 LZIC_<br>HUMAN,t<br>r B4E2N0<br> B4E2N0_<br>HUMAN,t<br>r E2QV57<br> E2QV57_<br>CANFA,tr <br>F1MFP9 <br>F1MFP9_<br>BOVIN,tr <br>F6UHP6 F<br>6UHP6_M<br>ONDO,tr <br>F7BV86 F<br>7BV86_C<br>ALJA,tr Q<br>3S296 Q3<br>S296_BOV<br>IN                                                                           | vSTD<br>LGSG<br>Dk       | 82% | 38.6 | 52.48201 | Ref | -0.3 | -0.31 | 0.01  | -0.034 | 0.35 | -0.68 | 0.17  | 14600 | 10300 | 11100 | 15600 | 16700 | 19000 | 9710 | 17400 | 793.9 | 1585.9 | 2 | 0.0105 | 6.595 |
| Chromobox protein<br>homolog 3 OS=Mus<br>musculus GN=Cbx3<br>PE=1 SV=2 | 8 CBX3_<br>MOUSE,s<br>p Q13185<br> CBX3_H<br>UMAN,sp<br> Q5R6X7 <br>CBX3_PO<br>NAB,tr A<br>4D177 A4<br>D177_HU<br>MAN,tr A<br>6H7C4 A6<br>H7C4_BO<br>VIN,tr D2<br>GVC6 D2<br>GVC6_AIL<br>ME,tr D2<br>H3E9 D2<br>H3E9_AIL<br>ME,tr D3<br>YV86 D3Y<br>V86_MOU<br>SE,tr D3Z<br>RS6 D3ZR<br>S6_RAT,tr<br> E2QXC6 <br>E2QXC6_ | ITW<br>HScP<br>EDE<br>AQ | 82% | 32.3 | 46.27356 | Ref | 0.12 | -0.09 | -0.02 | 0.038  | 0.24 | -0.21 | -0.05 | 6020  | 5670  | 5330  | 6280  | 7210  | 7260  | 5530 | 6130  | 883.4 | 1764.8 | 2 | 0.0116 | 6.556 |



|                                                                                                            |                                                                                                                                                                                                                                |                      |            |             |                 |            |              |              |             |              |              |              |              |             |             |             |             |             |             |             |             |              |               |          |               |              |
|------------------------------------------------------------------------------------------------------------|--------------------------------------------------------------------------------------------------------------------------------------------------------------------------------------------------------------------------------|----------------------|------------|-------------|-----------------|------------|--------------|--------------|-------------|--------------|--------------|--------------|--------------|-------------|-------------|-------------|-------------|-------------|-------------|-------------|-------------|--------------|---------------|----------|---------------|--------------|
| <p>Transforming growth factor beta-1-induced transcript 1 protein OS=Homo sapiens GN=TGFB111 PE=1 SV=2</p> | <p>4 TGF1_HUMAN,sp Q3MHZ4 TGF1_BOVIN,sp Q62219 TGF1_MOUSE,sp Q99PD6 TGF1_RAT, tr D3ZDW8 D3ZDW8_RAT, tr D3ZIW6 D3ZIW6_RAT, tr D3ZWZ2 D3ZWZ2_RAT, tr D3ZWZ3 D3ZWZ3_RAT, tr E2RTE0 E2RTE0_CANFA, tr E9PYQ1 E9PYQ1_MOUSE, tr E</p> | <p>rDFL QLFA PR</p>  | <p>82%</p> | <p>38.9</p> | <p>51.89631</p> | <p>Ref</p> | <p>-0.38</p> | <p>-0.34</p> | <p>-0.5</p> | <p>-0.61</p> | <p>-0.65</p> | <p>-0.42</p> | <p>-0.66</p> | <p>1090</p> | <p>729</p>  | <p>814</p>  | <p>816</p>  | <p>833</p>  | <p>710</p>  | <p>869</p>  | <p>728</p>  | <p>523</p>   | <p>1565.9</p> | <p>3</p> | <p>0.0074</p> | <p>4.742</p> |
| <p>Programmed cell death 6-interacting protein OS=Homo sapiens GN=PDCC6IP PE=1 SV=1</p>                    | <p>M4 PDC6I_HUMAN,sp Q9QZA2 PDC6I_RAT,sp Q9WU78 PDC6I_MOUSE, tr B4DHD2 B4DHD2_HUMAN, tr B7Z5C1 B7Z5C1_HUMAN, tr B8JL8 B8JL8_MOUSE, tr D2HB07 D2HB07_AILME, tr E1BKM4 E1BKM4_BOVIN, tr E9PFU1 E9PFU1_HUMAN, tr F7AFS1 F7AFS</p> | <p>niQV SHQ EFSK</p> | <p>82%</p> | <p>40.7</p> | <p>53.71529</p> | <p>Ref</p> | <p>0.046</p> | <p>-0.05</p> | <p>-0.2</p> | <p>-0.12</p> | <p>0.05</p>  | <p>-0.15</p> | <p>0.068</p> | <p>4690</p> | <p>4210</p> | <p>4260</p> | <p>4320</p> | <p>5040</p> | <p>4950</p> | <p>4510</p> | <p>5190</p> | <p>642.4</p> | <p>1924.1</p> | <p>3</p> | <p>0.0111</p> | <p>5.763</p> |

|                                                                                            |                                                                                                                                                                                                                                    |           |      |     |      |          |     |       |       |       |        |       |       |       |      |      |      |      |      |      |      |      |       |        |   |        |       |
|--------------------------------------------------------------------------------------------|------------------------------------------------------------------------------------------------------------------------------------------------------------------------------------------------------------------------------------|-----------|------|-----|------|----------|-----|-------|-------|-------|--------|-------|-------|-------|------|------|------|------|------|------|------|------|-------|--------|---|--------|-------|
| Apoptotic chromatin condensation inducer in the nucleus OS=Mus musculus GN=Acin1 PE=1 SV=3 | ACINU_MOUSE,s p Q9UKV3 ACINU_HUMAN, tr A4FUB9 A4FUB9_BOVIN, tr A7Z082 A7Z082_BOVIN, tr B2RTT4 B2RTT4_HUMAN, tr B4DQZ7 B4DQZ7_HUMAN, tr B8JJ88 B8JJ88_MOUSE, tr B8JJ90 B8JJ90_MOUSE, tr B8JJ91 B8JJ91_MOUSE, tr B8JJ92 B8JJ92_MOUSE | kPSISITTE | Slk  | 82% | 35   | 48.01569 | Ref | 0.013 | -0.07 | -0.23 | -0.066 | -0.06 | -0.07 | 0.025 | 5260 | 4610 | 4730 | 4740 | 5860 | 5140 | 5320 | 5650 | 739.5 | 2215.4 | 3 | 0.0056 | 2.523 |
| Phosphoenolpyruvate carboxykinase [GTP], mitochondrial OS=Homo sapiens GN=PCK2 PE=1 SV=3   | PCKGM_HUMAN, tr B2RYG2 B2RYG2_RAT, tr B4DW73 B4DW73_HUMAN, tr C5I4T6 C5I4T6_PIG, tr D2HG60 D2HG60_AILME, tr F1LQJ7 F1LQJ7_RAT, tr F1MDS3 F1MDS3_BOVIN, tr F6QQ15 F6QQ15_C                                                          | eTPI      | GLVP | 82% | 36.8 | 50.87792 | Ref | -0.18 | -0.02 | -0.29 | -0.18  | -0.14 | -0.36 | -0.35 | 5390 | 4140 | 5020 | 4660 | 5540 | 4980 | 4460 | 4460 | 781.5 | 1560.9 | 2 | 0.0239 | 15.3  |

|                                                                        |                                                                                                                                                                                                                                |              |     |      |          |     |       |       |       |        |      |       |       |       |       |       |       |       |       |      |       |       |        |   |        |       |
|------------------------------------------------------------------------|--------------------------------------------------------------------------------------------------------------------------------------------------------------------------------------------------------------------------------|--------------|-----|------|----------|-----|-------|-------|-------|--------|------|-------|-------|-------|-------|-------|-------|-------|-------|------|-------|-------|--------|---|--------|-------|
| Uncharacterized protein OS=Sus scrofa GN=DCTPP1 PE=4 SV=1              | tr F1RG62 F1RG62_PIG, tr F6R4W4 F6R4W4_H ORSE, tr F7BMM4 F7BMM4_CALJA, tr F7GUH8 F7GUH8_CALJA                                                                                                                                  | vDLP QAV LSk | 82% | 36.9 | 49.94832 | Ref | 0.47  | 1.1   | 0.28  | 0.35   | 0.11 | -0.04 | 0.23  | 5940  | 7180  | 12100 | 7630  | 8860  | 6530  | 6170 | 7340  | 560   | 1677   | 3 | 0.0251 | 14.99 |
| Uncharacterized protein OS=Rattus norvegicus GN=ll6 PE=4 SV=1          | LPT5 F1LPT5_RAT, sp Q29503 UB2R2_RABIT, sp Q6ZWZ2 UB2R2_MOUSE, sp Q712K3 UB2R2_HUMAN, tr B2RZ96 B2RZ96_RAT, tr D2HUA0 D2HUA0_AILME, tr D3ZNR7 D3ZNR7_RAT, tr E9PSL9 E9PSL9_RAT, tr F7E9R9 F7E9R9_CALJA, tr F7FAJ7 F7FAJ7_MONDO | aLM LqIk     | 82% | 36.4 | 49.49892 | Ref | -0.19 | -0.18 | 0.18  | -0.036 | 0.23 | -0.46 | 0.18  | 2200  | 1670  | 1830  | 2640  | 2510  | 2630  | 1700 | 2640  | 476   | 1424.9 | 3 | 0.0031 | 2.189 |
| Uncharacterized protein (Fragment) OS=Bos taurus GN=Bt.77725 PE=4 SV=1 | tr F1MM14 F1MM14_BOVIN, tr F1PUU5 F1PUU5_CANFA, tr F7AX25 F7AX25_HORSE                                                                                                                                                         | sVDL DSFT VR | 82% | 37.7 | 51.85276 | Ref | 0.1   | -0.25 | 0.075 | -0.13  | 0.18 | -0.77 | 0.071 | 13200 | 12300 | 10500 | 14800 | 14100 | 15300 | 8260 | 14700 | 721.9 | 1441.8 | 2 | 0.0115 | 7.941 |

|                                                                     |                                                                                                                                                                                                                           |                                                            |     |      |          |     |       |       |       |       |      |       |      |      |      |      |      |      |      |      |      |       |        |   |        |       |
|---------------------------------------------------------------------|---------------------------------------------------------------------------------------------------------------------------------------------------------------------------------------------------------------------------|------------------------------------------------------------|-----|------|----------|-----|-------|-------|-------|-------|------|-------|------|------|------|------|------|------|------|------|------|-------|--------|---|--------|-------|
| 40S ribosomal protein S8<br>OS=Homo sapiens<br>GN=RPS8 PE=1<br>SV=2 | 1 RS8_HUMAN,sp P62242 RS8_MOUSE,sp P62243 RS8_RAT,sp Q4R6P8 RS8_MACFA,sp Q5E958 RS8_BOVIN,tr B2R9R8 B2R9R8_RAT,tr D2HUN9 D2HUN9_AILME,tr D3ZIE1 D3ZIE1_RAT,tr E2RFR0 E2RFR0_CANFA,tr F2X209 F2X209_AILME,tr F2Z5F5 F2Z5F5 | qWY<br>ESHY<br>ALPL<br>GR                                  | 81% | 40.1 | 53.23879 | Ref | 0.45  | -0.05 | 0.44  | 0.11  | 0.23 | 0.068 | 0.29 | 4870 | 5780 | 4430 | 6980 | 6150 | 5830 | 5440 | 6290 | 642   | 1923   | 3 | 0.0087 | 4.536 |
| Uncharacterized protein OS=Bos taurus GN=Bt.7899<br>PE=4 SV=1       | tr E1BNQ9 E1BNQ9_BOVIN                                                                                                                                                                                                    | aAEE<br>ATAE<br>SGG<br>VNG<br>GEEq<br>GTG<br>kGEE<br>DEPER | 81% | 36   | 51.23959 | Ref | -0.56 | -0.66 | -0.63 | -0.23 | -0.3 | -0.67 | -0.3 | 812  | 479  | 483  | 554  | 811  | 672  | 545  | 695  | 932.9 | 3727.7 | 4 | 0.0245 | 6.583 |

|                                                                                       |                                                                                                                                                                                                                                      |                                      |     |      |          |     |       |      |       |       |       |       |       |      |       |       |      |      |      |      |      |       |        |   |        |       |
|---------------------------------------------------------------------------------------|--------------------------------------------------------------------------------------------------------------------------------------------------------------------------------------------------------------------------------------|--------------------------------------|-----|------|----------|-----|-------|------|-------|-------|-------|-------|-------|------|-------|-------|------|------|------|------|------|-------|--------|---|--------|-------|
| <p>Osteoclast-stimulating factor 1<br/>OS=Mus musculus<br/>GN=Ostf1 PE=1<br/>SV=2</p> | <p>2 OSTF1_MOUSE,s<br/>p Q6P686 OSTF1_RAT,sp Q8MJ49 OSTF1_PIG,s<br/>p Q8MJ50 OSTF1_BOVIN,sp Q92882 OSTF1_HUMAN,tr A6YLN0 A6YLN0_CEREL,tr A8K646 A8K646_HUMAN,tr D215R0 D215R0_AILME,tr F1MWK2 F1MWK2_BOVIN,tr F1P8W3 F1P8W3_CANF</p> | <p>IGDT<br/>ALH<br/>AAA<br/>Wk</p>   | 81% | 39.5 | 52.80797 | Ref | -0.12 | -0.3 | -0.15 | -0.11 | -0.07 | -0.11 | -0.19 | 8870 | 7100  | 6820  | 8480 | 9580 | 8600 | 8760 | 8190 | 621.4 | 1861.1 | 3 | 0.011  | 5.919 |
| <p>Protein HEXIM1<br/>OS=Homo sapiens<br/>GN=HEXIM1 PE=1<br/>SV=1</p>                 | <p>2 HEX11_HUMAN,s<br/>p Q0X0C4 HEX11_BOVIN,sp Q8R409 HEX11_MOUSE,tr B3KN49 B3KN49_HUMAN,tr D2HCX4 D2HCX4_AILME,tr F1PRR3 F1PRR3_CANFA,tr F1RR19 F1RR19_PIG,tr F7BGX2 F7BGX2_MACMU,tr F7DSW2 F7DSW2_HORSE,tr F7F2K3 F7F2K3</p>       | <p>aENL<br/>QLLT<br/>ENEL<br/>HR</p> | 80% | 40.4 | 53.96042 | Ref | 2     | 1.7  | 0.035 | -0.16 | 0.25  | 0.062 | 0.23  | 7370 | 25300 | 22800 | 7990 | 7710 | 8930 | 8190 | 9100 | 662   | 1983.1 | 3 | 0.0138 | 6.972 |

|                                                                                     |                                                                                                                                                                                                                             |                          |     |      |          |     |       |       |       |        |       |       |       |       |       |       |       |       |       |       |       |       |        |   |        |       |
|-------------------------------------------------------------------------------------|-----------------------------------------------------------------------------------------------------------------------------------------------------------------------------------------------------------------------------|--------------------------|-----|------|----------|-----|-------|-------|-------|--------|-------|-------|-------|-------|-------|-------|-------|-------|-------|-------|-------|-------|--------|---|--------|-------|
| Ribosomal L1 domain-containing protein 1 OS=Bos taurus GN=RSL1D1 PE=2 SV=1          | sp A4FV97 RL1D1_BOVIN, tr Q58DV6 Q58DV6_BOVIN                                                                                                                                                                               | ISLP<br>HGIR             | 80% | 36.7 | 50.32474 | Ref | 0.13  | -0.08 | -0.52 | -0.53  | -0.39 | 0.044 | -0.18 | 4850  | 4620  | 4320  | 3590  | 3920  | 3780  | 5320  | 4520  | 399.6 | 1195.7 | 3 | 0.0081 | 6.783 |
| Angiogenic factor with G patch and FHA domains 1 OS=Mus musculus GN=Aggf1 PE=2 SV=1 | sp Q7TN31 AGGF1_MOUSE                                                                                                                                                                                                       | dLSS<br>EDqK             | 80% | 34.2 | 48.8513  | Ref | -0.18 | -0.21 | -0.17 | -0.002 | 0.041 | -0.48 | -0.18 | 18000 | 13800 | 14700 | 16900 | 21000 | 18900 | 13800 | 16800 | 613.8 | 1225.6 | 2 | #####  | 0.026 |
| Paraspeckle component 1 OS=Bos taurus GN=PSPC1 PE=2 SV=1                            | 9 PSPC1_BOVIN, sp Q4KLH4 PSPC1_RA_T, sp Q8R326 PSPC1_MOUSE, sp Q8WXF1 PSPC1_HUMAN, tr B4DWI8 B4DWI8_HUMAN, tr D2HT12 D2HT12_AILME, tr E2QXH2 E2QXH2_CANFA, tr F1RN28 F1RN28_PIG, tr F5H656 F5H656_HUMAN, tr F6UAH8 F6UAH8_C | gFVE<br>FAAk<br>PPA<br>R | 80% | 38.8 | 52.46848 | Ref | 0.33  | -0    | -0.01 | -0.059 | 0.12  | 0.062 | 0.26  | 16200 | 17600 | 15200 | 17000 | 18100 | 17900 | 18000 | 20500 | 633.4 | 1897.1 | 3 | 0.0138 | 7.268 |

|                                                                |                                                                                                                                                                                                                            |                             |     |      |          |     |        |       |       |       |       |       |      |      |      |      |      |      |      |      |      |       |        |   |       |       |
|----------------------------------------------------------------|----------------------------------------------------------------------------------------------------------------------------------------------------------------------------------------------------------------------------|-----------------------------|-----|------|----------|-----|--------|-------|-------|-------|-------|-------|------|------|------|------|------|------|------|------|------|-------|--------|---|-------|-------|
| Protocadherin-1<br>OS=Homo sapiens<br>GN=PCDH1 PE=1<br>SV=2    | 4 PCDH1_HUMAN, tr A4IFK1 A4IFK1_BOVIN, tr A8K0E7 A8K0E7_HUMAN, tr B3KQM8 B3KQM8_HUMAN, tr B4DUA8 B4DUA8_HUMAN, tr B4E2D8 B4E2D8_HUMAN, tr C4MH74 C4MH74_MUSPF, tr D2GUL7 D2GUL7_AILME, tr E2QX92 E2QX92_CANFA, tr E2QX93 E | qASE<br>TGS<br>DSK          | 80% | 38.3 | 52.1731  | Ref | -0.027 | -0.23 | 0.096 | -0.12 | -0.15 | -0.86 | 0.17 | 5720 | 4880 | 4620 | 6480 | 6160 | 5260 | 3370 | 6800 | 540   | 1616.8 | 3 | 0.007 | 4.326 |
| Obg-like ATPase 1<br>OS=Rattus norvegicus<br>GN=Ola1 PE=2 SV=1 | OLA1_RAT, sp Q2HJ33 OLA1_BOVIN, sp Q5R821 OLA1_PONAB, sp Q9CZ30 OLA1_MOUSE, sp Q9NTK5 OLA1_HUMAN, tr B1AYJ9 B1AYJ9_MOUSE, tr B4DK14 B4DK14_HUMAN, tr C9JK6 C9JK6_HUMAN, tr D2HE13 D2HE13_AILME, tr D3ZG25 D3ZG25_RAT, tr D | iPAF<br>LNV<br>VDIA<br>GLVK | 80% | 34.6 | 48.50481 | Ref | -1.1   | -1.3  | -1.2  | -1.1  | -1.3  | -1.6  | -1.5 | 499  | 207  | 196  | 230  | 272  | 200  | 173  | 188  | 726.5 | 2176.3 | 3 | 0.014 | 6.408 |

|                                                                                                                        |                                                                                                                                                                                                                        |            |     |      |          |     |        |       |       |       |       |       |       |       |       |       |       |       |       |       |       |       |        |   |        |       |
|------------------------------------------------------------------------------------------------------------------------|------------------------------------------------------------------------------------------------------------------------------------------------------------------------------------------------------------------------|------------|-----|------|----------|-----|--------|-------|-------|-------|-------|-------|-------|-------|-------|-------|-------|-------|-------|-------|-------|-------|--------|---|--------|-------|
| Discs, large (Drosophila) homolog-associated protein 4 OS=Bos taurus GN=DLGAP4 PE=2 SV=1                               | tr A0JNK4 A0JNK4_BOVIN, tr F1N5I2 F1N5I2_BOVIN                                                                                                                                                                         | kAPP PVPk  | 79% | 28.4 | 42.61929 | Ref | -0.023 | 0.087 | 0.058 | 0.004 | 0.19  | -0.04 | 0.21  | 17100 | 14600 | 17100 | 18900 | 20000 | 19900 | 17800 | 20900 | 582.7 | 1745.1 | 3 | #####  | 0.55  |
| Serine/threonine-protein phosphatase 2A 65 kDa regulatory subunit A alpha isoform OS=Homo sapiens GN=PPP2R1A PE=1 SV=4 | 3 2AAA_HUMAN, sp P54612 2AAA_PIG, sp Q32PI5 2AAA_BOVIN, sp Q76MZ3 2AAA_MOUSE, tr A5D973 A5D973_BOVIN, tr A8K3H8 A8K3H8_HUMAN, tr A8K7B7 A8K7B7_HUMAN, tr B3KQV6 B3KQV6_HUMAN, tr B4DDF7 B4DDF7_HUMAN, tr B4DE69 B4DE69 | hML PTVL R | 79% | 37.2 | 51.47781 | Ref | 0.01   | 0.059 | 0.22  | -0.17 | 0.001 | -0.11 | 0.009 | 9190  | 8050  | 9030  | 11300 | 9550  | 9370  | 9060  | 9770  | 424.3 | 1269.7 | 3 | 0.0104 | 8.19  |
| Putative uncharacterized protein (Fragment) OS=Ailuropoda melanoleuca GN=PANDA_015269 PE=4 SV=1                        | tr D2HT27 D2HT27_AILME                                                                                                                                                                                                 | vLAG HK    | 78% | 32.2 | 47.53069 | Ref | 0.3    | -0.28 | 0.41  | 0.044 | 0.43  | -0.19 | 0.47  | 35800 | 38300 | 27900 | 50500 | 43100 | 49300 | 33500 | 52200 | 616.9 | 1231.8 | 2 | 0.0022 | 1.767 |



|                                                                                                                    |                                                                                                                                                                                                                                                                   |                                 |     |      |          |     |       |       |       |        |       |       |       |      |      |      |      |      |      |      |      |       |        |   |        |       |
|--------------------------------------------------------------------------------------------------------------------|-------------------------------------------------------------------------------------------------------------------------------------------------------------------------------------------------------------------------------------------------------------------|---------------------------------|-----|------|----------|-----|-------|-------|-------|--------|-------|-------|-------|------|------|------|------|------|------|------|------|-------|--------|---|--------|-------|
| Sec61 beta subunit<br>OS=Bos taurus<br>GN=SEC61B PE=4<br>SV=1                                                      | tr Q2NKT<br>5 Q2NKT<br>5_BOVIN                                                                                                                                                                                                                                    | pGP<br>APS<br>GTN<br>VGSS<br>GR | 78% | 36.8 | 52.16789 | Ref | -0.22 | -0.12 | 0.093 | -0.097 | 0.083 | 0.15  | 0.055 | 5600 | 4180 | 4870 | 6320 | 6110 | 6040 | 6630 | 6140 | 822.9 | 1643.8 | 2 | 0.0129 | 7.853 |
| Vesicle-associated<br>membrane protein-<br>associated protein<br>A OS=Bos taurus<br>GN=VAPA PE=2<br>SV=1           | sp Q0VCY<br>1 VAPA_<br>BOVIN,sp<br> Q5R601 <br>VAPA_PO<br>NAB,sp Q<br>9POL0 VA<br>PA_HUM<br>AN,tr A8K<br>A83 A8K<br>A83_HUM<br>AN,tr D2<br>HHS4 D2<br>HHS4_AIL<br>ME,tr E2<br>R580 E2R<br>580_CANF<br>A,tr F7BT<br>84 F7BT8<br>4_MOND<br>O                        | hEQI<br>LVLD<br>PPTD<br>Lk      | 78% | 36.5 | 53.01193 | Ref | 0.21  | 0.27  | 0.022 | 0.028  | 0.11  | -0.02 | 0.12  | 4410 | 4430 | 5000 | 4740 | 5240 | 4860 | 4620 | 5050 | 557.3 | 2225.3 | 4 | 0.0194 | 8.726 |
| Succinyl-CoA ligase<br>[GDP-forming]<br>subunit alpha,<br>mitochondrial<br>OS=Sus scrofa<br>GN=SUCLG1 PE=1<br>SV=2 | sp O1906<br>9 SUCA_P<br>IG,sp Q58<br>DR8 SUC<br>A_BOVIN,<br>tr E2R0Y5<br> E2R0Y5_<br>CANFA,tr <br>F1MZ38 F<br>1MZ38_B<br>OVIN,tr F<br>1SNZ6 F1<br>SNZ6_PIG,<br>tr F1SNZ7<br> F1SNZ7_<br>PIG,tr F6<br>QTC9 F6<br>QTC9_HO<br>RSE,tr F6<br>WVM3 F<br>6WVM3_<br>MONDO | tHLG<br>LPVF<br>NTVk            | 78% | 36.1 | 50.73348 | Ref | 0.4   | -0.02 | 0.27  | 0.017  | -0.01 | 0.16  | 0.12  | 4130 | 4750 | 3850 | 5280 | 4880 | 4180 | 4910 | 4740 | 645.4 | 1933.1 | 3 | 0.0139 | 7.188 |

|                                                                            |                                                                                                                                                                                                                                |                                             |            |             |                 |            |               |              |              |               |              |              |              |             |             |             |             |             |             |             |             |              |               |          |               |              |
|----------------------------------------------------------------------------|--------------------------------------------------------------------------------------------------------------------------------------------------------------------------------------------------------------------------------|---------------------------------------------|------------|-------------|-----------------|------------|---------------|--------------|--------------|---------------|--------------|--------------|--------------|-------------|-------------|-------------|-------------|-------------|-------------|-------------|-------------|--------------|---------------|----------|---------------|--------------|
| <p>DnaJ homolog subfamily B member 4 OS=Bos taurus GN=DNAJB4 PE=2 SV=1</p> | <p>sp Q2KIT4 DNJB4_BOVIN,sp Q5R8J8 DNJB4_PONAB,sp Q9UDY4 DNJB4_HUMAN,tr C9JUL4 C9JUL4_HUMAN,tr D2HJ67 D2HJ67_AILME,tr F6W2E8 F6W2E8_CAJA</p>                                                                                   | <p>gkDY<br/>YcIL<br/>GIEk</p>               | <p>78%</p> | <p>38.2</p> | <p>54.74375</p> | <p>Ref</p> | <p>-0.026</p> | <p>-0.21</p> | <p>-0.18</p> | <p>-0.061</p> | <p>-0.22</p> | <p>-0.29</p> | <p>-0.34</p> | <p>1900</p> | <p>1620</p> | <p>1550</p> | <p>1770</p> | <p>2130</p> | <p>1660</p> | <p>1650</p> | <p>1580</p> | <p>590.8</p> | <p>2359.3</p> | <p>4</p> | <p>0.0348</p> | <p>14.74</p> |
| <p>Nuclear transport factor 2 OS=Homo sapiens GN=NUTF2 PE=1 SV=1</p>       | <p>0 NTF2_HUMAN,sp P61971 NTF2_MOUSE,sp P61972 NTF2_RAT,sp Q32KP9 NTF2_BOVIN,sp Q5R8G4 NTF2_PONAB,tr D2H9F9 D2H9F9_AILME,tr E2RKL9 E2RKL9_CANFA,tr F1S2K3 F1S2K3_PIG,tr F1SH55 F1SH55_PIG,tr F6XJB0 F6XJB0_HORSE,tr F7IRG6</p> | <p>aDE<br/>DPI<br/>MGF<br/>HQM<br/>FLLk</p> | <p>77%</p> | <p>40.2</p> | <p>54.84424</p> | <p>Ref</p> | <p>0.38</p>   | <p>-0.42</p> | <p>-0.03</p> | <p>-0.25</p>  | <p>-0.19</p> | <p>-0.36</p> | <p>-0.6</p>  | <p>907</p>  | <p>1030</p> | <p>639</p>  | <p>942</p>  | <p>889</p>  | <p>813</p>  | <p>751</p>  | <p>633</p>  | <p>834.1</p> | <p>2499.3</p> | <p>3</p> | <p>0.0147</p> | <p>5.882</p> |

|                                                                                           |                                                                                                                                                                                                                                                                                                                   |                                  |     |      |          |     |       |       |       |       |       |       |       |      |     |     |     |     |     |     |     |       |        |   |        |       |
|-------------------------------------------------------------------------------------------|-------------------------------------------------------------------------------------------------------------------------------------------------------------------------------------------------------------------------------------------------------------------------------------------------------------------|----------------------------------|-----|------|----------|-----|-------|-------|-------|-------|-------|-------|-------|------|-----|-----|-----|-----|-----|-----|-----|-------|--------|---|--------|-------|
| Mediator of RNA polymerase II transcription subunit 24 OS=Homo sapiens GN=MED24 PE=1 SV=1 | 75448 M<br>ED24_HU<br>MAN,REV<br>_sp Q4V8<br>B3 MED2<br>4_RAT,RE<br>V_sp Q99<br>K74 MED<br>24_MOUS<br>E,REV_tr <br>A6PW47 <br>A6PW47_<br>MOUSE,R<br>EV_tr B4<br>DDR8 B4<br>DDR8_HU<br>MAN,REV<br>_tr B4DS<br>Q6 B4DS<br>Q6_HUM<br>AN,REV_t<br>r B4E1A5<br> B4E1A5_<br>HUMAN,R<br>EV_tr B9T<br>X63 B9TX<br>63_HUMA | IAIHL<br>LR                      | 77% | 35.6 | 50.23623 | Ref | -0.13 | -0.21 | -0.59 | -0.48 | -0.34 | -0.3  | -0.42 | 1050 | 831 | 852 | 736 | 874 | 841 | 905 | 828 | 380.6 | 1138.7 | 3 | 0.0073 | 6.369 |
| Uncharacterized protein C1orf50 homolog OS=Mus musculus PE=2 SV=1                         | sp Q5EBG<br>8 CA050_<br>MOUSE,s<br>p Q9BV1<br>9 CA050_<br>HUMAN,t<br>r A2A7Q3<br> A2A7Q3<br>_MOUSE,t<br>r F1MZT6<br> F1MZT6<br>_BOVIN,tr<br> F7GIR8 <br>F7GIR8_<br>MACMU,t<br>r F7IGR7 <br>F7IGR7_C<br>ALIA                                                                                                       | ITVIA<br>EQIq<br>HLQ<br>EQA<br>R | 77% | 39.4 | 54.05145 | Ref | -0.36 | -0.49 | -0.48 | -0.53 | -0.28 | -0.36 | -0.2  | 400  | 271 | 269 | 303 | 323 | 335 | 332 | 367 | 728.1 | 2181.2 | 3 | 0.0024 | 1.079 |

|                                                                                                   |                                                                                                                                                                                                                                                            |                                      |     |      |          |     |       |       |      |       |       |       |       |      |       |      |       |      |       |       |      |       |        |   |        |       |
|---------------------------------------------------------------------------------------------------|------------------------------------------------------------------------------------------------------------------------------------------------------------------------------------------------------------------------------------------------------------|--------------------------------------|-----|------|----------|-----|-------|-------|------|-------|-------|-------|-------|------|-------|------|-------|------|-------|-------|------|-------|--------|---|--------|-------|
| <p>PDZ and LIM domain protein 7<br/> OS=Bos taurus<br/> GN=PDLIM7 PE=2<br/> SV=1</p>              | <p>0 PDL17_ BOVIN,sp  Q3TJD7  PDL17_M OUSE,sp  Q9NR12  PDL17_HU MAN,sp  Q9Z1Z9 P DLI7_RAT, tr A1L5A7  A1L5A7_ BOVIN,tr  B4DHD7  B4DHD7_ HUMAN,t r B8JJB1  B8JJB1_M OUSE,tr B8 JJB2 B8J JB2_MOU SE,tr B8J B3 B8JJB 3_MOUSE ,tr B8JJB5  B8JJB5_ MOUSE,tr</p> | <p>mDS<br/> Fk</p>                   | 77% | 32.3 | 47.83718 | Ref | -0.42 | -0.51 | -1.1 | -0.93 | -0.9  | -0.78 | -0.87 | 1490 | 963   | 985  | 728   | 910  | 809   | 920   | 859  | 487.2 | 972.48 | 2 | 0.0107 | 10.95 |
| <p>ATP synthase subunit gamma, mitochondrial<br/> OS=Bos taurus<br/> GN=ATP5C1 PE=1<br/> SV=3</p> | <p>sp P05631 ATPG_ BOVIN</p>                                                                                                                                                                                                                               | <p>sEAA<br/> NLA<br/> AAG<br/> k</p> | 77% | 37.6 | 52.35347 | Ref | 0.34  | 0.076 | 0.24 | -0.19 | 0.093 | 0.22  | -0.03 | 9440 | 10400 | 9390 | 11800 | 9670 | 10300 | 11700 | 9780 | 537.6 | 1609.9 | 3 | 0.0029 | 1.772 |

|                                                                                    |                                                                                                                                                                                                                                 |                              |            |             |                 |            |               |             |              |              |              |              |              |              |              |              |              |              |              |              |              |              |               |          |               |              |
|------------------------------------------------------------------------------------|---------------------------------------------------------------------------------------------------------------------------------------------------------------------------------------------------------------------------------|------------------------------|------------|-------------|-----------------|------------|---------------|-------------|--------------|--------------|--------------|--------------|--------------|--------------|--------------|--------------|--------------|--------------|--------------|--------------|--------------|--------------|---------------|----------|---------------|--------------|
| <p>Nucleolar RNA helicase 2<br/>OS=Homo sapiens<br/>GN=DDX21 PE=1<br/>SV=5</p>     | <p>sp Q9NR30 DDX21_HUMAN, tr A4FV23 A4FV23_BOVIN, tr D2GX14 D2GX14_AILME, tr E2QTL6 E2QTL6_CANFA, tr F1SUG7 F1SUG7_PIG, tr F6SQN9 F6SQN9_MACMU, tr F6SQP8 F6SQP8_MACMU, tr F6ZZU6 F6ZZU6_HORSE, tr F7D5Y8 F7D5Y8_CALIA</p>      | <p>gVTF<br/>LFPI<br/>QAK</p> | <p>77%</p> | <p>36</p>   | <p>50.81218</p> | <p>Ref</p> | <p>0.12</p>   | <p>0.25</p> | <p>-0.11</p> | <p>0.082</p> | <p>-0.16</p> | <p>0.43</p>  | <p>0.26</p>  | <p>3030</p>  | <p>2860</p>  | <p>3410</p>  | <p>2970</p>  | <p>3750</p>  | <p>2770</p>  | <p>4350</p>  | <p>3840</p>  | <p>610.4</p> | <p>1828.1</p> | <p>3</p> | <p>0.0128</p> | <p>7.003</p> |
| <p>Ubiquitin domain-containing protein UBF1 OS=Homo sapiens GN=UBFD1 PE=1 SV=2</p> | <p>2 UBFD1_HUMAN, sp Q78JW9 UBFD1_MOUSE, tr A6QQL4 A6QQL4_BOVIN, tr B3KW52 B3KW52_HUMAN, tr E2QVE4 E2QVE4_CANFA, tr E9QB07 E9QB07_MOUSE, tr F1PHN9 F1PHN9_CANFA, tr F1SAB5 F1SAB5_PIG, tr F6SMI8 F6SMI8_HORSE, tr F7AF69 F7</p> | <p>dAA<br/>QQD<br/>Ak</p>    | <p>77%</p> | <p>36.4</p> | <p>52.01187</p> | <p>Ref</p> | <p>-0.016</p> | <p>-0.2</p> | <p>-0.01</p> | <p>-0.2</p>  | <p>0.21</p>  | <p>-0.38</p> | <p>-0.06</p> | <p>13400</p> | <p>11500</p> | <p>11000</p> | <p>14100</p> | <p>13600</p> | <p>15700</p> | <p>10900</p> | <p>13600</p> | <p>727.9</p> | <p>1453.8</p> | <p>2</p> | <p>0.0055</p> | <p>3.76</p>  |

|                                                                                            |                                                                                                                                                                                                                                                                                                                          |                     |     |      |          |     |      |       |       |       |       |       |       |       |       |       |       |       |       |       |       |       |        |   |        |       |
|--------------------------------------------------------------------------------------------|--------------------------------------------------------------------------------------------------------------------------------------------------------------------------------------------------------------------------------------------------------------------------------------------------------------------------|---------------------|-----|------|----------|-----|------|-------|-------|-------|-------|-------|-------|-------|-------|-------|-------|-------|-------|-------|-------|-------|--------|---|--------|-------|
| Liprin-beta-1<br>OS=Homo sapiens<br>GN=PPFIBP1 PE=1<br>SV=2                                | 92 LIPB1_ HUMAN,s<br>p Q8C8U<br>0 LIPB1_ MOUSE,tr<br> D2H5Z0 <br>D2H5Z0_ AILME,tr <br>D3ZJW3 <br>D3ZJW3_ RAT,tr D3<br>ZSQ9 D3Z<br>SQ9_RAT,<br>tr F1MQ<br>Q8 F1MQ<br>Q8_BOVI<br>N,tr F5GY<br>63 F5GY6<br>3_HUMA<br>N,tr F5H0<br>E0 F5H0E<br>0_HUMA<br>N,tr F5H1<br>A9 F5H1A<br>9_HUMA<br>N,tr F5H4<br>95 F5H49            | aLHL<br>VEDL<br>R   | 76% | 37.4 | 52.37443 | Ref | 0.26 | 0.24  | 0.4   | -0.15 | 0.22  | 0.055 | -0.03 | 3240  | 3380  | 3610  | 4520  | 3400  | 3840  | 3580  | 3360  | 457.3 | 1368.8 | 3 | 0.0121 | 8.85  |
| DnaJ homolog<br>subfamily B<br>member 11<br>OS=Canis familiaris<br>GN=DNAJB11 PE=1<br>SV=2 | 9 DJB11_ CANFA,sp<br> Q3ZBA6 <br>DJB11_BO<br>VIN,sp Q<br>5RAJ6 DJ<br>B11_PON<br>AB,sp Q6<br>TUG0 DJB<br>11_RAT,s<br>p Q99KV<br>1 DJB11_<br>MOUSE,s<br>p Q9UBS<br>4 DJB11_<br>HUMAN,t<br>r B3KW6<br>3 B3KW6<br>3_HUMA<br>N,tr D2H<br>076 D2H0<br>76_AILME<br>,tr F1PXX<br>5 F1PXX5<br>_CANFA,tr<br> F1SFJ8 F<br>1SFJ8_PIG | tLEV<br>EIEP<br>GVR | 76% | 36.3 | 52.09375 | Ref | 0.29 | -0.22 | 0.046 | -0.18 | -0.19 | -0.02 | 0.065 | 12900 | 13800 | 10400 | 14100 | 13300 | 11500 | 13600 | 14300 | 773.4 | 1544.9 | 2 | 0.0111 | 7.173 |

|                                                                       |                                                                                                                                                                                                                                                                                                                            |                                 |     |      |          |     |       |       |       |       |       |       |       |       |       |       |       |       |       |       |       |       |        |   |        |       |
|-----------------------------------------------------------------------|----------------------------------------------------------------------------------------------------------------------------------------------------------------------------------------------------------------------------------------------------------------------------------------------------------------------------|---------------------------------|-----|------|----------|-----|-------|-------|-------|-------|-------|-------|-------|-------|-------|-------|-------|-------|-------|-------|-------|-------|--------|---|--------|-------|
| ISG15 protein<br>OS=Ovis aries<br>GN=ISG15 PE=4<br>SV=1               | tr D5FS21<br> D5FS21_<br>SHEEP,tr <br>F2X355 F<br>2X355_CA<br>PHI,tr Q9<br>GKP4 Q9<br>GKP4_SH<br>EEP                                                                                                                                                                                                                       | eVLQ<br>EGV<br>PLVH<br>QGL<br>k | 76% | 34.3 | 51.4349  | Ref | 0.071 | -0.29 | -0.11 | -0.21 | -0.24 | -0.17 | -0.24 | 4900  | 4470  | 3790  | 4820  | 4940  | 4240  | 4650  | 4390  | 564.3 | 2253.3 | 4 | 0.0077 | 3.419 |
| SF4 protein OS=Bos<br>taurus GN=SF4<br>PE=2 SV=1                      | tr A4FV6<br>4 A4FV64<br>_BOVIN,tr<br> E1BMW<br>4 E1BM<br>W4_BOVI<br>N                                                                                                                                                                                                                                                      | rPPLI<br>SSPL<br>GQV<br>k       | 75% | 33.3 | 48.64938 | Ref | 0.32  | 0.17  | 0.27  | 0.15  | 0.37  | 0.23  | 0.31  | 7490  | 8120  | 7960  | 9520  | 9670  | 9860  | 9360  | 9790  | 667.4 | 1999.2 | 3 | 0.0152 | 7.623 |
| 60S ribosomal<br>protein L28 OS=Mus<br>musculus GN=Rpl28<br>PE=1 SV=2 | 5 RL28_<br>MOUSE,s<br>p P46779<br> RL28_HU<br>MAN,sp <br>Q3T0L7 R<br>L28_BOVI<br>N,tr B4DE<br>P9 B4DEP<br>9_HUMA<br>N,tr C9JB<br>50 C9JB5<br>0_HUMA<br>N,tr D2H<br>UW2 D2<br>HUW2_AI<br>LME,tr D<br>3ZEIO D3<br>ZEIO_RAT,<br>tr D3ZJD3<br> D3ZJD3_<br>RAT,tr E2<br>ROA6 E2R<br>0A6_CAN<br>FA,tr E9P<br>B24 E9PB<br>24_HUMA | tVGV<br>EPA<br>ADG<br>k         | 75% | 37.3 | 52.63134 | Ref | 0.22  | -0.23 | 0.21  | -0.13 | 0.23  | -0.18 | 0.17  | 22100 | 22300 | 17700 | 27000 | 23500 | 26300 | 20700 | 26200 | 551.3 | 1650.9 | 3 | 0.0108 | 6.53  |

|                                                                                |                                                                                                                                                                                                                                                                                                            |                    |     |      |          |     |       |       |       |       |       |       |       |       |       |       |       |       |       |       |       |       |        |   |        |       |
|--------------------------------------------------------------------------------|------------------------------------------------------------------------------------------------------------------------------------------------------------------------------------------------------------------------------------------------------------------------------------------------------------|--------------------|-----|------|----------|-----|-------|-------|-------|-------|-------|-------|-------|-------|-------|-------|-------|-------|-------|-------|-------|-------|--------|---|--------|-------|
| Transcription elongation factor A protein 1 OS=Mus musculus GN=Tcea1 PE=1 SV=2 | 1 TCEA1_MOUSE,s<br>p P23193<br> TCEA1_HUMAN,sp<br> Q29RL9 <br>TCEA1_BOVIN,sp <br>Q4KLL0 T<br>CEA1_RAT<br>,tr B7Z4<br>W0 B7Z4<br>WO_HUMAN,tr D2I<br>302 D2I3<br>02_AILME<br>,tr E2QV<br>N6 E2QV<br>N6_CANFA,<br>tr E2RH4<br>3 E2RH4<br>3_CANFA,<br>tr E2RH4<br>5 E2RH45<br>_CANFA,tr<br> E9PYD5 <br>E9PYD5_ | dTYV<br>SSFP<br>R  | 75% | 34.8 | 50.906   | Ref | 0.14  | -0.23 | 0.061 | -0.17 | 0.093 | -0.28 | 0.019 | 15000 | 14300 | 12000 | 16600 | 15600 | 16300 | 13200 | 16100 | 688.4 | 1374.7 | 2 | 0.0111 | 8.054 |
| Thyroglobulin OS=Homo sapiens GN=TG PE=1 SV=5                                  | REV_sp P<br>01266 TH<br>YG_HUMAN,REV_t<br>r B2RU26<br> B2RU26_<br>HUMAN                                                                                                                                                                                                                                    | LAPT<br>LDqk       | 75% | 34.2 | 50.328   | Ref | 0.34  | -0.25 | 0.18  | 0.062 | -0.28 | 0.28  | -0.01 | 27100 | 29900 | 21600 | 32500 | 33000 | 22800 | 35000 | 28500 | 595.8 | 1189.7 | 2 | 0.0073 | 6.134 |
| Cyclin-dependent kinase 12 OS=Bos taurus GN=CDK12 PE=3 SV=1                    | sp E1BB5<br>0 CDK12_BOVIN,tr <br>F1RWL3 <br>F1RWL3_<br>PIG,tr F8S<br>1I2 F8S11<br>2_PIG                                                                                                                                                                                                                    | sNEE<br>nDD<br>HGk | 75% | 34.4 | 49.86517 | Ref | -0.28 | -0.26 | -0.27 | -0.48 | -0.05 | -0.65 | -0.04 | 1450  | 1040  | 1140  | 1270  | 1210  | 1430  | 982   | 1490  | 585.3 | 1752.8 | 3 | 0.0138 | 7.861 |



|                                                                                  |                                                                                                                                                                                                                              |            |     |      |          |     |      |       |       |       |       |       |       |      |      |      |      |      |      |      |      |       |        |   |        |       |
|----------------------------------------------------------------------------------|------------------------------------------------------------------------------------------------------------------------------------------------------------------------------------------------------------------------------|------------|-----|------|----------|-----|------|-------|-------|-------|-------|-------|-------|------|------|------|------|------|------|------|------|-------|--------|---|--------|-------|
| Malate dehydrogenase, cytoplasmic OS=Sus scrofa GN=MDH1 PE=1 SV=4                | 8 MDHC_PIG,sp P40925 MDHC_HUMAN,sp Q3T145 MDHC_BOVIN,sp Q7YRU4 MDHC_FELCA,tr B4DUN2 B4DUN2_HUMAN,AN,tr B7Z317 B7Z317_HUMAN,AN,tr B8ZZ51 B8ZZ51_HUMAN,AN,tr B9A041 B9A041_HUMAN,AN,tr D2HHZ6 D2HHZ6_AILME,AN,tr E2QV08 E2QV08 | alcD       | 75% | 33.3 | 48.77498 | Ref | 0.19 | -0.54 | 0.19  | -0.32 | 0.081 | -0.24 | -0.31 | 6190 | 6130 | 4000 | 7480 | 5770 | 6670 | 5570 | 5260 | 388.5 | 1162.6 | 3 | 0.0072 | 6.149 |
| Sulfotransferase family cytosolic 1B member 1 OS=Bos taurus GN=SULT1B1 PE=2 SV=1 | sp Q3T0Y3 ST1B1_BOVIN                                                                                                                                                                                                        | eMSETELQFR | 75% | 34.3 | 50.5222  | Ref | -0.4 | -0.59 | -0.16 | -0.17 | -0.38 | -0.7  | -0.21 | 7640 | 5040 | 4780 | 7220 | 7940 | 5970 | 5010 | 7000 | 787.4 | 1572.8 | 2 | 0.0072 | 4.565 |

|                                                                                          |                                                                                                                                                                                                                                                                                                                                 |                      |     |      |          |     |       |       |       |        |       |       |       |       |       |       |       |       |       |       |       |       |        |   |        |       |
|------------------------------------------------------------------------------------------|---------------------------------------------------------------------------------------------------------------------------------------------------------------------------------------------------------------------------------------------------------------------------------------------------------------------------------|----------------------|-----|------|----------|-----|-------|-------|-------|--------|-------|-------|-------|-------|-------|-------|-------|-------|-------|-------|-------|-------|--------|---|--------|-------|
| Cytochrome b5<br>OS=Homo sapiens<br>GN=CYB5A PE=1<br>SV=2                                | 7 CYB5_H<br>UMAN,sp<br> P00169 <br>CYB5_RA<br>BIT,sp P0<br>0170 CYB<br>5_HORSE,<br>sp P0017<br>1 CYB5_B<br>OVIN,sp <br>P00172 C<br>YB5_PIG,t<br>r A5HEW<br>3 A5HEW<br>3_CAPHI,t<br>r C9E8M7<br> C9E8M7<br>_SHEEP,tr<br> D9ILX1 <br>D9ILX1_C<br>ANFA,tr E<br>2R119 E2<br>R119_CA<br>NFA,tr P7<br>0116 P70<br>116_MES<br>AU,tr Q5 | tFIIG<br>ELHP<br>DDR | 75% | 37.3 | 52.78591 | Ref | 0.028 | 0.11  | -0.14 | -0.052 | -0.25 | 6E-04 | -0.11 | 6190  | 5480  | 6310  | 5950  | 6970  | 5290  | 6590  | 6050  | 573   | 1715.9 | 3 | 0.0143 | 8.353 |
| Oxidized low-<br>density lipoprotein<br>receptor 1 OS=Bos<br>taurus GN=OLR1<br>PE=1 SV=1 | sp P7939<br>1 OLR1_B<br>OVIN,tr A<br>1L4Z7 A1<br>L4Z7_BOV<br>IN                                                                                                                                                                                                                                                                 | qNL<br>NLQ<br>EVLK   | 74% | 35.5 | 51.27338 | Ref | -0.8  | -0.83 | -0.72 | -0.94  | -0.88 | -1.2  | -0.27 | 17000 | 8450  | 9010  | 10900 | 10300 | 9350  | 8010  | 14800 | 603   | 1806.1 | 3 | 0.0195 | 10.77 |
| Uncharacterized<br>protein (Fragment)<br>OS=Canis familiaris<br>GN=FAIM3 PE=4<br>SV=1    | tr F1PYL6<br> F1PYL6_<br>CANFA                                                                                                                                                                                                                                                                                                  | aSSV<br>AASK         | 73% | 32.7 | 49.25163 | Ref | 0.12  | -0.06 | 0.057 | -0.39  | -0.25 | -0.14 | -0.31 | 22400 | 21200 | 20300 | 24700 | 20000 | 19200 | 21600 | 19000 | 512.8 | 1023.6 | 2 | 0.0098 | 9.553 |

|                                                                                                        |                                                                                                                                                                                                                                              |            |             |                 |            |             |             |             |              |             |              |              |             |             |             |              |             |             |             |              |              |               |          |               |              |
|--------------------------------------------------------------------------------------------------------|----------------------------------------------------------------------------------------------------------------------------------------------------------------------------------------------------------------------------------------------|------------|-------------|-----------------|------------|-------------|-------------|-------------|--------------|-------------|--------------|--------------|-------------|-------------|-------------|--------------|-------------|-------------|-------------|--------------|--------------|---------------|----------|---------------|--------------|
| <p>Cytochrome c oxidase subunit 5A, mitochondrial<br/>OS=Nycticebus coucang GN=COX5A<br/>PE=2 SV=1</p> | <p>2 COX5A_NYCCO,sp B0VYY3 COX5A_OTOCR,sp B0VYY4 COX5A_EULFU,sp B0VYY5 COX5A_MA_CPM,sp P00426 COX5A_BOVIN,sp P11240 COX5A_RAT,sp P12787 COX5A_MOUSE,trans D2HKX8 D2HKX8_AILME,trans D7NY67 D7NY67_SgMN COKU,trans D7NY68 D7NY68_PEPK</p>     | <p>73%</p> | <p>38.4</p> | <p>54.33107</p> | <p>Ref</p> | <p>0.37</p> | <p>0.42</p> | <p>0.76</p> | <p>0.3</p>   | <p>0.63</p> | <p>0.49</p>  | <p>0.8</p>   | <p>6160</p> | <p>6950</p> | <p>7780</p> | <p>11000</p> | <p>8870</p> | <p>9710</p> | <p>9180</p> | <p>11400</p> | <p>747.7</p> | <p>2240.2</p> | <p>3</p> | <p>0.0148</p> | <p>6.584</p> |
| <p>Translin-associated protein X<br/>OS=Macaca fascicularis<br/>GN=TSNAX PE=2 SV=1</p>                 | <p>9 TSNAX_MACFA,sp Q5RC21 TSNAX_PONAB,sp Q99598 TSNAX_HUMAN,sp Q9JHB5 TSNAX_RAT,sp Q9QZE7 TSNAX_MOUSE,trans A3RLZ2 A3RLZ2_BOVIN,trans A3RLZ3 A3RLZ3_BOSMU,trans B1APC6 B1APC6_HUMAN,trans C4P0D4 C4P0D4_HUMAN,trans C4P0D6 C4P0D6_HUMAN</p> | <p>73%</p> | <p>33.7</p> | <p>49.68931</p> | <p>Ref</p> | <p>0.42</p> | <p>0.43</p> | <p>0.19</p> | <p>-0.33</p> | <p>0.23</p> | <p>-0.26</p> | <p>-0.04</p> | <p>1440</p> | <p>1680</p> | <p>1830</p> | <p>1740</p>  | <p>1340</p> | <p>1720</p> | <p>1280</p> | <p>1480</p>  | <p>401.9</p> | <p>1202.7</p> | <p>3</p> | <p>0.0021</p> | <p>1.73</p>  |

|                                                                   |                                                                                                                                                                                                                                     |                    |     |      |          |     |       |       |       |       |       |       |       |       |       |       |       |       |       |       |       |       |        |   |        |       |
|-------------------------------------------------------------------|-------------------------------------------------------------------------------------------------------------------------------------------------------------------------------------------------------------------------------------|--------------------|-----|------|----------|-----|-------|-------|-------|-------|-------|-------|-------|-------|-------|-------|-------|-------|-------|-------|-------|-------|--------|---|--------|-------|
| Calpain II small subunit (Fragment)<br>OS=Ovis aries PE=2<br>SV=1 | tr Q1PCR9 Q1PCR9_SHEEP, tr Q9GL70 Q9GL70_SHEEP                                                                                                                                                                                      | tDGF<br>GVD<br>TcR | 73% | 29.8 | 46.51016 | Ref | 0.045 | -0.33 | -0    | -0.33 | -0.17 | -0.26 | -0.21 | 31300 | 28100 | 23600 | 33200 | 29100 | 28500 | 27800 | 28600 | 710.8 | 1419.6 | 2 | 0.0106 | 7.455 |
| UPF0552 protein<br>C15orf38 homolog<br>OS=Bos taurus PE=2<br>SV=1 | U3 CO038_BOVIN, sp Q726K5 CO038_HUMAN, sp Q9D0A3 CO038_MOUSE, tr D2I419 D2I419_AI LME, tr E2QRD5 E2QRD5_HUMAN, tr E2RT25 E2RT25_CA NFA, tr F1SK02 F1SK02_PIG, tr F6THE8 F6THE8_CALJA, tr F6W2Q3 F6W2Q3_HORSE, tr F6YHY1 F6YHY1_CAYk | kVNT<br>GFL<br>MSS | 73% | 35.6 | 53.6377  | Ref | 0.11  | -0.21 | 0.063 | -0.1  | 0.1   | -0.28 | 0.16  | 7280  | 6840  | 5930  | 8040  | 7900  | 7970  | 6390  | 8610  | 572.6 | 2286.3 | 4 | 0.0343 | 15    |

|                                                                                                                             |                                                                                                                                                                                                                    |                                    |      |     |      |          |     |       |       |       |        |       |       |       |       |      |       |       |       |       |       |       |       |        |   |        |       |
|-----------------------------------------------------------------------------------------------------------------------------|--------------------------------------------------------------------------------------------------------------------------------------------------------------------------------------------------------------------|------------------------------------|------|-----|------|----------|-----|-------|-------|-------|--------|-------|-------|-------|-------|------|-------|-------|-------|-------|-------|-------|-------|--------|---|--------|-------|
| Endophilin-A1<br>OS=Rattus<br>norvegicus<br>GN=Sh3gl2 PE=1<br>SV=2                                                          | 9 SH3G2_ RAT,sp O35964 SH3G1_RAT,sp Q2KJA1 SH3G1_BOVIN,sp Q62419 SH3G1_MOUSE,sp Q62420 SH3G2_MOUSE,sp Q99961 SH3G1_HUMAN,sp Q99962 SH3G2_HUMAN,tr A2ALV1 A2ALV1_MOUSE,tr A2ALV3 A2ALV3_MOUSE,tr B7Z1K6 B7Z1K6_HUMA | tIEYL<br>QPN                       | PASR | 73% | 36.2 | 52.8867  | Ref | -0.17 | -0.03 | -0.09 | -0.045 | 0.069 | -0.06 | -0.08 | 12000 | 9260 | 11100 | 11900 | 13500 | 12800 | 12200 | 12000 | 847   | 1691.9 | 2 | 0.0118 | 6.983 |
| Aminoacyl tRNA<br>synthase complex-<br>interacting<br>multifunctional<br>protein 1 OS=Homo<br>sapiens GN=AIMP1<br>PE=1 SV=2 | sp Q12904 AIMP1_HUMAN,t<br>r F6RYT0 F6RYT0_ MACMU,t<br>r Q5R6N9 Q5R6N9_PONAB                                                                                                                                       | kHP<br>DAD<br>SLYV<br>EEVD<br>VGEI | APR  | 72% | 37.3 | 55.39598 | Ref | 0.2   | 0.14  | 0.41  | 0.081  | 0.13  | 0.14  | 0.52  | 2770  | 2760 | 2870  | 3880  | 3410  | 3080  | 3250  | 4180  | 737.6 | 2946.5 | 4 | 0.035  | 11.88 |

|                                                                              |                                                                                                                                                                                                                                                                                                                    |                                        |     |      |          |     |       |       |       |       |       |       |       |      |      |      |       |      |      |      |      |       |        |   |        |       |
|------------------------------------------------------------------------------|--------------------------------------------------------------------------------------------------------------------------------------------------------------------------------------------------------------------------------------------------------------------------------------------------------------------|----------------------------------------|-----|------|----------|-----|-------|-------|-------|-------|-------|-------|-------|------|------|------|-------|------|------|------|------|-------|--------|---|--------|-------|
| Uncharacterized protein (Fragment)<br>OS=Bos taurus<br>GN=DCHS2 PE=4<br>SV=1 | MQP6 F1<br>MQP6_B<br>OVIN,sp <br>P97372 P<br>SME2_M<br>OUSE,sp <br>QSE9G3 <br>PSME2_B<br>OVIN,sp <br>Q63798 P<br>SME2_RA<br>T,sp Q86<br>3Z0 PSM<br>E2_PIG,sp<br> Q924A2 <br>CIC_MOU<br>SE,sp Q9<br>6RK0 CIC<br>_HUMAN,<br>sp Q9UL4<br>6 PSME2<br>_HUMAN,<br>tr A7XAK<br>3 A7XAK3<br>_HUMAN,<br>tr A8M27<br>6 A8M27 | aLVH<br>ER                             | 72% | 33   | 49.30307 | Ref | 0.16  | -0.58 | 0.42  | -0.56 | 0.41  | -0.81 | -0.4  | 7300 | 7070 | 4600 | 10300 | 5780 | 9880 | 4410 | 5850 | 343.5 | 1027.6 | 3 | 0.0041 | 3.939 |
| Splicing factor 3B subunit 1 OS=Homo sapiens GN=SF3B1 PE=1 SV=3              | 3 SF3B1_HUMAN,sp Q99NB9 SF3B1_MOUSE,trans A0JLN0 A0JLN0_MOUSE,trans A0JLT9 A0JLT9_HUMAN,trans A0PJH5 A0PJH5_HUMAN,trans D2HDI4 D2HDI4_AILME,trans F1MX61 F1MX61_BOVIN,trans F1PKF6 F1PKF6_CANFA,trans F1SMZ9 F1SMZ9_PIG,trans F6R058 F6R058                                                                        | iWD<br>PTPS<br>HTP<br>AGA<br>ATP<br>GR | 72% | 37.4 | 53.78743 | Ref | -0.12 | -0.06 | -0.08 | -0.24 | -0.05 | -0.03 | -0.05 | 6510 | 5200 | 5900 | 6520  | 6440 | 6430 | 6770 | 6670 | 712.7 | 2135.1 | 3 | 0.0255 | 11.94 |

|                                                                              |                                                                                                                                                                                                                       |                    |     |      |          |     |        |       |       |        |       |       |       |       |       |       |       |       |       |       |       |       |        |   |        |       |
|------------------------------------------------------------------------------|-----------------------------------------------------------------------------------------------------------------------------------------------------------------------------------------------------------------------|--------------------|-----|------|----------|-----|--------|-------|-------|--------|-------|-------|-------|-------|-------|-------|-------|-------|-------|-------|-------|-------|--------|---|--------|-------|
| Transcriptional activator protein Pur-beta OS=Mus musculus GN=Purb PE=1 SV=3 | sp O35295 PURB_MOUSE,sp Q68A21 PURB_RAT,sp Q96QR8 PURB_HUMAN,tr F1LSL1 F1LSL1_RAT,tr F6PGI5 F6PGI5_CALJA,tr F7G9V3 F7G9V3_MOUSE,NDONDO                                                                                | iAEV<br>GAG<br>Gsk | 71% | 35.3 | 51.83073 | Ref | 0.1    | -0.17 | -0.01 | -0.037 | 0.14  | 0.1   | -0.02 | 14500 | 13500 | 12200 | 15300 | 16500 | 16300 | 16600 | 15100 | 499.6 | 1495.9 | 3 | #####  | 0.482 |
| UPF0568 protein C14orf166 homolog OS=Pongo abelii PE=2 SV=1                  | 2 CN166_PONAB,sp Q9CQE8 CN166_MOUSE,sp Q9Y224 CN166_HUMAN,tr D2HV44 D2HV44_AILME,tr D3ZBL9 D3ZBL9_RAT,tr E2RFC7 E2RFC7_CANFA,tr F1SFF4 F1SFF4_PIG,tr F6SGY9 F6SGY9_HORSE,tr F6TL07 F6TL07_CALJA,tr F7E9I3 F7E9I3_MACM | ITQD<br>AVA<br>k   | 71% | 34   | 51.06466 | Ref | -0.2   | -0.34 | -0.23 | -0.44  | -0.06 | -0.57 | -0.28 | 41200 | 31100 | 30700 | 37300 | 35500 | 40300 | 29600 | 35800 | 727.4 | 1452.9 | 2 | 0.0073 | 5.024 |
| Tetratricopeptide repeat protein 1 OS=Bos taurus GN=TTC1 PE=2 SV=1           | sp Q3ZBR5 TTC1_BOVIN,tr F1RR38 F1RR38_PIG,tr F7E2T3 F7E2T3_HORSE                                                                                                                                                      | eMA<br>ISDc<br>Sk  | 71% | 33.7 | 50.22028 | Ref | -0.042 | -0.1  | -0.18 | -0.16  | -0.02 | -0.27 | -0.09 | 14400 | 12200 | 12700 | 13400 | 15100 | 14500 | 12800 | 14300 | 546.6 | 1636.8 | 3 | 0.0239 | 14.57 |

|                                                                                             |                                                                                                                                                                                                                                                                                                                                      |                             |     |      |          |     |      |       |       |       |      |       |      |      |      |      |      |      |      |      |      |       |        |   |        |       |
|---------------------------------------------------------------------------------------------|--------------------------------------------------------------------------------------------------------------------------------------------------------------------------------------------------------------------------------------------------------------------------------------------------------------------------------------|-----------------------------|-----|------|----------|-----|------|-------|-------|-------|------|-------|------|------|------|------|------|------|------|------|------|-------|--------|---|--------|-------|
| Uncharacterized protein (Fragment)<br>OS=Monodelphis domestica<br>GN=AFAP1L1 PE=4<br>SV=1   | REV_tr F6<br>XZ22 F6X<br>Z22_MON<br>DO,REV_t<br>r Q862G1<br> Q862G1<br>_BOVIN                                                                                                                                                                                                                                                        | PnAS<br>EVK                 | 71% | 32.2 | 49.33938 | Ref | 0.67 | 0.047 | 0.51  | 0.18  | 0.22 | 0.017 | 0.59 | 4180 | 5790 | 4080 | 6330 | 5530 | 4950 | 4500 | 6660 | 525.3 | 1048.6 | 2 | 0.0106 | 10.1  |
| CDGSH iron-sulfur domain-containing protein 1 OS=Rattus norvegicus<br>GN=Cisd1 PE=3<br>SV=1 | 0 CISD1_<br>RAT,sp Q<br>3ZBU2 CI<br>SD1_BOVI<br>N,sp Q91<br>WS0 CISD<br>1_MOUSE<br>,sp Q9NZ<br>45 CISD1<br>_HUMAN,<br>tr D2I216<br> D2I216_<br>AILME,tr <br>F1PNJ5 F<br>1PNJ5_CA<br>NFA,tr F1<br>SD10 F1S<br>D10_PIG,t<br>r F6QXV3<br> F6QXV3_<br>HORSE,tr <br>F6SHE0 F<br>6SHE0_CA<br>LJA,tr F7<br>DRZ5 F7D<br>RZ5_MON<br>DO,tr F7F | hNEE<br>TGD<br>NVG<br>PLIHK | 71% | 37.9 | 54.5016  | Ref | 0.13 | 0.13  | -0.06 | 0.066 | 0.26 | 0.23  | 0.22 | 5890 | 5610 | 6070 | 5990 | 7190 | 7200 | 7330 | 7220 | 748.7 | 2243.2 | 3 | 0.0184 | 8.179 |



|                                                                                                             |                                                                                                                                                                                                                           |                |     |      |          |     |       |       |       |       |       |       |       |       |       |       |       |       |       |       |       |       |        |   |        |       |
|-------------------------------------------------------------------------------------------------------------|---------------------------------------------------------------------------------------------------------------------------------------------------------------------------------------------------------------------------|----------------|-----|------|----------|-----|-------|-------|-------|-------|-------|-------|-------|-------|-------|-------|-------|-------|-------|-------|-------|-------|--------|---|--------|-------|
| Protein kinase C and casein kinase substrate in neurons 2 protein OS=Rattus norvegicus GN=Pacsin2 PE=1 SV=2 | 7 PACN2_RAT,sp Q9UNF0 PACN2_HUMAN,sp Q9WVVE8 PACN2_MOUSE,tr F1PUE2 F1PUE2_CANFA,tr F1SJR5 F1SJR5_PIG, tr F6RH78 F6RH78_CALJA, tr F6XXK2 F6XXK2_MACMU, tr F7B6B8 F7B6B8_ORNAN, tr F7B6C6 F7B6C6_O RNAN, tr F7B9Q9 F7B9Q9_H | Fk             | 70% | 37.3 | 54.01483 | Ref | -0.17 | -0.07 | -0.16 | -0.13 | 0.2   | -0.47 | 0.005 | 4570  | 3520  | 4110  | 4330  | 4880  | 5330  | 3510  | 4840  | 851.4 | 2551.2 | 3 | 0.0204 | 8.011 |
| Voltage-dependent anion-selective channel protein 2 OS=Homo sapiens GN=VDAC2 PE=1 SV=2                      | 0 VDAC2_HUMAN, sp P68002 VDAC2_BOVIN, sp P68003 VDAC2_RABIT, sp P81155 VDAC2_RAT, sp Q60930 VDAC2_MOUSE, sp Q9MZ15 VDAC2_PIG, tr B4DKM5 B4DKM5_HUMAN, tr D4AD77 D4AD77_RAT, tr E2R948 E2R948_CANFA, tr E2RDZ1 E2RDZ1_CAN  | YQLD PTAS ISAK | 70% | 36.6 | 53.33221 | Ref | 0.33  | 0.007 | 0.021 | -0.12 | -0.13 | 0.15  | -0.05 | 12200 | 13300 | 11500 | 13100 | 13100 | 11300 | 14400 | 12500 | 634.7 | 1901.1 | 3 | 0.0157 | 8.239 |

|                                                                             |                                                                                                                                                                                                                        |                            |     |      |          |     |       |      |       |        |       |      |       |      |      |      |      |      |      |       |      |       |        |   |        |       |
|-----------------------------------------------------------------------------|------------------------------------------------------------------------------------------------------------------------------------------------------------------------------------------------------------------------|----------------------------|-----|------|----------|-----|-------|------|-------|--------|-------|------|-------|------|------|------|------|------|------|-------|------|-------|--------|---|--------|-------|
| Ubiquitin carboxyl-terminal hydrolase 49 OS=Homo sapiens GN=USP49 PE=2 SV=1 | sp Q70CQ1 UBP49_HUMAN, tr Q5T3E1 Q5T3E1_HUMAN                                                                                                                                                                          | VPA<br>ATLK                | 70% | 30.9 | 48.15067 | Ref | 0.038 | 0.13 | 0.092 | -0.047 | -0.01 | 0.21 | -0.08 | 8530 | 7610 | 8780 | 9620 | 9630 | 8600 | 10500 | 8520 | 502.3 | 1002.6 | 2 | 0.0107 | 10.69 |
| Biglycan OS=Ovis aries GN=BGN PE=2 SV=1                                     | 0 PGS1_SHEEP,sp O46403 PGS1_HORSE,sp P21809 PGS1_BOVIN,sp P21810 PGS1_HUMAN,sp P28653 PGS1_MOUSE,sp P47853 PGS1_RAT,sp Q9GKQ6 PGS1_PIG, tr A6NLG9 A6NLG9_HUMAN, tr A8K7E0 A8K7E0_HUMAN, tr B3KS75 B3KS75_HUMAN, tr B4D | gLQ<br>HLVA<br>LVLV<br>NNK | 70% | 33.7 | 50.36832 | Ref | 0.1   | 0.48 | 0.13  | -0.011 | -0.03 | 0.75 | -0.06 | 1000 | 935  | 1320 | 1160 | 1160 | 998  | 1800  | 1020 | 730.8 | 2189.3 | 3 | 0.013  | 5.925 |

|                                                                                                  |                                                                                                                                                                                                                       |                   |     |      |          |     |       |       |       |       |       |       |      |       |       |       |       |       |       |       |       |       |        |   |        |       |
|--------------------------------------------------------------------------------------------------|-----------------------------------------------------------------------------------------------------------------------------------------------------------------------------------------------------------------------|-------------------|-----|------|----------|-----|-------|-------|-------|-------|-------|-------|------|-------|-------|-------|-------|-------|-------|-------|-------|-------|--------|---|--------|-------|
| B-cell receptor-associated protein 31-like protein (Fragment)<br>OS=Callithrix jacchus PE=2 SV=1 | tr A6MKK9 A6MKK9_CALJA, tr D2I1N6 D2I1N6_AILME, tr F1S2A8 F1S2A8_PI G, tr F6RP01 F6RP01_ORNAN, tr F6RP12 F6RP12_ORNAN, tr F7DHC3 F7DHC3_CALJA, tr F7FTW2 F7FTW2_MONDO, tr F7FTX3 F7FTX3_MONDO, tr Q5E9F1 Q5E9F1_BOVIN | aENq<br>ALA<br>MR | 70% | 33.6 | 50.91153 | Ref | -0.15 | -0.33 | 0.013 | -0.24 | 0.053 | -0.48 | -0.2 | 14400 | 11200 | 10800 | 15300 | 14200 | 15200 | 10900 | 13200 | 654.8 | 1307.7 | 2 | 0.0094 | 7.161 |
| Uncharacterized protein (Fragment)<br>OS=Ornithorhynchus anatinus<br>GN=MLC1 PE=4 SV=1           | tr F7AG62 F7AG62_ORNAN                                                                                                                                                                                                | SNEE<br>cFk       | 70% | 26.5 | 43.93435 | Ref | 0.13  | 0.008 | 0.25  | 0.084 | 0.81  | -0.23 | 0.48 | 2800  | 2660  | 2650  | 3510  | 3460  | 4980  | 2540  | 4110  | 603.8 | 1205.5 | 2 | 0.0117 | 9.696 |

|                                                                            |                                                                                                                                                           |                    |     |      |          |     |        |       |       |        |      |       |       |      |      |      |       |       |       |       |       |       |        |   |        |       |
|----------------------------------------------------------------------------|-----------------------------------------------------------------------------------------------------------------------------------------------------------|--------------------|-----|------|----------|-----|--------|-------|-------|--------|------|-------|-------|------|------|------|-------|-------|-------|-------|-------|-------|--------|---|--------|-------|
| Procollagen galactosyltransferase 1 OS=Bos taurus GN=GLT25D1 PE=2 SV=1     | sp A5PK45 GT251_BOVIN,sp Q8K297 GT251_MOUSE,sp Q8NBJ5 GT251_HUMAN,tr B1H282 B1H282_RAT,tr F1S940 F1S940_PIG,tr F6W8D5 F6W8D5_MONDO,tr F7CE53 F7CE53_CALIA | VLIALLAR           | 69% | 17   | 34.53318 | Ref | -0.081 | -0.27 | -0.09 | -0.49  | -0.4 | -0.19 | -0.6  | 5580 | 4590 | 4360 | 5540  | 4640  | 4300  | 5210  | 3890  | 586.9 | 1171.8 | 2 | 0.0055 | 4.658 |
| Uncharacterized protein (Fragment) OS=Equus caballus GN=Eca.5196 PE=3 SV=1 | tr F7D038 F7D038_HORSE                                                                                                                                    | kTEG YSG ADIS VIVR | 69% | 36.7 | 53.79969 | Ref | 0.28   | 0.053 | 0.11  | 0.072  | 0.1  | 0.25  | 0.1   | 9300 | 9830 | 9100 | 10700 | 11400 | 10200 | 11800 | 10500 | 735.1 | 2202.2 | 3 | 0.0256 | 11.62 |
| DnaJ homolog subfamily B member 1 OS=Bos taurus GN=DNAJB1 PE=2 SV=3        | sp Q3MI00 DNJB1_BOVIN,tr D2HFZ7 D2HFZ7_AILME,tr E2R9D7 E2R9D7_CANFA,tr F1SCF5 F1SCF5_PIG                                                                  | SRPA QEPT R        | 69% | 34.2 | 51.28098 | Ref | 0.0038 | 0.11  | 0.28  | -0.082 | 0.22 | -0.41 | -0.02 | 2750 | 2390 | 2800 | 3530  | 3030  | 3260  | 2190  | 2850  | 449.2 | 1344.7 | 3 | 0.0138 | 10.24 |

|                                                                                                 |                                                                                                                                                                                                                            |                 |     |      |          |     |       |      |       |       |       |       |       |       |       |       |       |       |       |       |       |       |        |   |        |       |
|-------------------------------------------------------------------------------------------------|----------------------------------------------------------------------------------------------------------------------------------------------------------------------------------------------------------------------------|-----------------|-----|------|----------|-----|-------|------|-------|-------|-------|-------|-------|-------|-------|-------|-------|-------|-------|-------|-------|-------|--------|---|--------|-------|
| Ribosome<br>biogenesis<br>regulatory protein<br>homolog OS=Homo<br>sapiens GN=RRS1<br>PE=1 SV=2 | sp Q15050 RRS1_HUMAN,sp Q2KIH4 RRS1_BOVIN,tr D2H419 D2H419_AILME,tr F1MPT7 F1MPT7_BOVIN,tr F1PRD1 F1PRD1_CANFA,tr F6PSSO F6PSO_HORSE,tr F7HZW9 F7HZW9_CALJAW                                                               | VEEAIVAR        | 69% | 32.3 | 49.89837 | Ref | -0.12 | 0.27 | -1    | -0.24 | -0.49 | -0.17 | -0.09 | 28700 | 23000 | 32700 | 14700 | 28300 | 20700 | 27200 | 28400 | 595.9 | 1189.7 | 2 | 0.0106 | 8.894 |
| Collagen alpha-1(V)<br>chain OS=Homo<br>sapiens GN=COL5A1<br>PE=1 SV=3                          | 8 CO5A1_HUMAN,tr B2ZZ86 B2ZZ86_HUMAN,tr D2HF79 D2HF79_AILME,tr F1PHX8 F1PHX8_CANFA,tr F1S019 F1S019_PIG,tr F1S022 F1S022_PIG,tr F6PLH0 F6PLH0_HORSE,tr F6Q357 F6Q357_HORSE,tr F6SUU9 F6SUU9_HORSE,tr F6ZCA5 F6ZCA5_ORNANTk | VLDFHNL<br>PDGI | 68% | 36.3 | 53.41755 | Ref | 0.023 | 0.71 | -0.15 | 0.24  | -0.26 | 1     | -0.32 | 4120  | 3630  | 6340  | 3930  | 5660  | 3500  | 8850  | 3490  | 693.1 | 2076.2 | 3 | 0.019  | 9.135 |

|                                                                              |                                                                                                                                                                                                                   |               |     |      |          |     |       |       |       |       |      |       |       |      |      |      |      |      |      |      |      |     |        |   |        |       |
|------------------------------------------------------------------------------|-------------------------------------------------------------------------------------------------------------------------------------------------------------------------------------------------------------------|---------------|-----|------|----------|-----|-------|-------|-------|-------|------|-------|-------|------|------|------|------|------|------|------|------|-----|--------|---|--------|-------|
| Rho-related GTP-binding protein<br>RhoC OS=Homo sapiens GN=RHOC<br>PE=1 SV=1 | 4 RHOC_HUMAN,sp P24406 RHOA_CANFA,sp P61585 RHOA_BOVIN,sp P61586 RHOA_HUMAN,sp P61589 RHOA_RAT,sp P62745 RHOBRHOB_HUMAN,sp P62746 RHOB_MOUSE,sp P62747 RHOBRAT,sp Q1RMJ6 RHOC_BOVIN,sp Q3ZBW5 RHOBRHOB_BOVIN,sp Q | tcLLI<br>VFSK | 68% | 34   | 51.20011 | Ref | -0.15 | -0.46 | -0.16 | -0.31 | -0.4 | -0.11 | -0.25 | 3060 | 2400 | 2090 | 2910 | 2880 | 2370 | 3010 | 2720 | 560 | 1677   | 3 | 0.0024 | 1.409 |
| Nucleolar protein 16 OS=Bos taurus<br>GN=NOP16 PE=2<br>SV=1                  | sp Q5E996 NOP16_BOVIN,transcript F1LVIO F1LVIO_RAT,transcript F1S17 F1S17_PIG,transcript F6SK9 F6SK9_CALJA,transcript F6VNP7 F6VNP7_CALJA,transcript F6XJR9 F6XJR9_CALJA                                          | aVPL<br>Lk    | 68% | 19.7 | 36.90816 | Ref | 0.23  | 0.5   | 0.34  | 0.19  | 0.57 | 0.087 | 0.51  | 2560 | 2600 | 3410 | 3430 | 3410 | 3880 | 2890 | 3840 | 417 | 1247.8 | 3 | 0.0024 | 1.947 |

|                                                                                            |                                                                                                                                                                                                                                     |                                     |            |             |                 |            |              |             |              |              |              |              |              |              |              |              |              |              |              |              |              |              |               |          |               |              |
|--------------------------------------------------------------------------------------------|-------------------------------------------------------------------------------------------------------------------------------------------------------------------------------------------------------------------------------------|-------------------------------------|------------|-------------|-----------------|------------|--------------|-------------|--------------|--------------|--------------|--------------|--------------|--------------|--------------|--------------|--------------|--------------|--------------|--------------|--------------|--------------|---------------|----------|---------------|--------------|
| <p>Sister chromatid cohesion protein PDS5 homolog A OS=Homo sapiens GN=PDS5A PE=1 SV=1</p> | <p>sp Q29RF7 PDS5A_HUMAN,ter B3KMN2 B3KMN2_HUMAN,triE1BK G4 E1BK G4_BOVIN,triF6UEY4 F6UEY4_MACMU,triF7EZH0 F7EZH0_MACMU,triQ96DB6 Q96DB6_HUMAN</p>                                                                                  | <p>tVTA<br/>AGA<br/>ENIQ<br/>QK</p> | <p>68%</p> | <p>36.1</p> | <p>53.31781</p> | <p>Ref</p> | <p>0.34</p>  | <p>-0.2</p> | <p>-0.21</p> | <p>-0.29</p> | <p>0.028</p> | <p>-0.36</p> | <p>-0.06</p> | <p>15600</p> | <p>17100</p> | <p>12800</p> | <p>14200</p> | <p>14900</p> | <p>16200</p> | <p>12900</p> | <p>15800</p> | <p>647</p>   | <p>1938.1</p> | <p>3</p> | <p>0.0177</p> | <p>9.117</p> |
| <p>CD63 antigen OS=Homo sapiens GN=CD63 PE=1 SV=2</p>                                      | <p>2 CD63_HUMAN,sp P28648 CD63_RAT,sp P41731 CD63_MOUSE,sp Q28709 CD63_RABIT,sp Q76B49 CD63_FELCA,sp Q9XSK2 CD63_BOVIN,triB0JYM4 B0JYM4_BOVIN,triC9JV86 C9JV86_HUMAN,triD2I560 D2I560_AILME,triF1LPA7 F1LPA7_RAT,triF1PIT4 F1PI</p> | <p>sGYE<br/>Vm</p>                  | <p>68%</p> | <p>28.5</p> | <p>46.28726</p> | <p>Ref</p> | <p>-0.48</p> | <p>-0.4</p> | <p>-0.57</p> | <p>-0.59</p> | <p>-0.6</p>  | <p>-0.49</p> | <p>-0.39</p> | <p>1800</p>  | <p>1120</p>  | <p>1290</p>  | <p>1290</p>  | <p>1390</p>  | <p>1210</p>  | <p>1370</p>  | <p>1450</p>  | <p>503.2</p> | <p>1004.5</p> | <p>2</p> | <p>0.015</p>  | <p>14.97</p> |

|                                                                                |                                                                                                                                                                                                                                   |                  |            |             |                 |            |              |              |              |              |              |              |              |             |             |             |             |             |             |             |             |              |               |          |               |              |
|--------------------------------------------------------------------------------|-----------------------------------------------------------------------------------------------------------------------------------------------------------------------------------------------------------------------------------|------------------|------------|-------------|-----------------|------------|--------------|--------------|--------------|--------------|--------------|--------------|--------------|-------------|-------------|-------------|-------------|-------------|-------------|-------------|-------------|--------------|---------------|----------|---------------|--------------|
| <p>WD repeat-containing protein 78 OS=Rattus norvegicus GN=Wdr78 PE=2 SV=1</p> | <p>4V8G4 WDR78_RA T,REV_sp Q5VTH9 WDR78_HUMAN,REV_tr A0AVI9 A0AVI9_HUMAN,REV_tr D2HIA8 D2HIA8_AILME,REV_tr D4A7V5 D4A7V5_RAT,REV_tr D4A7W4 D4A7W4_RAT,REV_tr E1B9S6 E1B9S6_BOVIN,REV_tr E2RML5 E2RML5_CANFA,REV_tr E2R</p>        | <p>qSILAEk</p>   | <p>67%</p> | <p>31.2</p> | <p>49.08743</p> | <p>Ref</p> | <p>0.73</p>  | <p>0.37</p>  | <p>0.51</p>  | <p>0.56</p>  | <p>0.2</p>   | <p>0.91</p>  | <p>0.49</p>  | <p>1320</p> | <p>1900</p> | <p>1600</p> | <p>1990</p> | <p>2270</p> | <p>1540</p> | <p>2630</p> | <p>1950</p> | <p>538.8</p> | <p>1075.6</p> | <p>2</p> | <p>0.0028</p> | <p>2.624</p> |
| <p>Chromobox protein homolog 5 OS=Homo sapiens GN=CBX5 PE=1 SV=1</p>           | <p>3 CBX5_HUMAN,sp Q61686 CBX5_MOUSE,tr B2RYU7 B2RYU7_RA T,tr C8BKD4 C8BKD4_SHEEP,tr D2HM50 D2HM50_AILME,tr D3Z0U2 D3Z0U2_MOUSE,tr E2QYK6 E2QYK6_CANFA,tr F1MXF8 F1MXF8_BOVIN,tr F2Z4J7 F2Z4J7_BOVIN,tr F2Z5T3 F2Z5T3_PIG,tr </p> | <p>gQV EYLLk</p> | <p>67%</p> | <p>32.7</p> | <p>50.13115</p> | <p>Ref</p> | <p>-0.31</p> | <p>-0.28</p> | <p>-0.19</p> | <p>-0.14</p> | <p>-0.15</p> | <p>-0.09</p> | <p>0.007</p> | <p>7650</p> | <p>5370</p> | <p>5930</p> | <p>7080</p> | <p>8120</p> | <p>7030</p> | <p>7660</p> | <p>8120</p> | <p>520</p>   | <p>1556.9</p> | <p>3</p> | <p>0.0043</p> | <p>2.781</p> |



|                                                                                             |                                                                                                                                                                                                                                                                                                             |                         |     |      |          |     |       |       |       |       |       |       |       |       |       |       |       |       |       |       |       |       |        |   |        |       |
|---------------------------------------------------------------------------------------------|-------------------------------------------------------------------------------------------------------------------------------------------------------------------------------------------------------------------------------------------------------------------------------------------------------------|-------------------------|-----|------|----------|-----|-------|-------|-------|-------|-------|-------|-------|-------|-------|-------|-------|-------|-------|-------|-------|-------|--------|---|--------|-------|
| Uncharacterized protein (Fragment)<br>OS=Callithrix jacchus<br>GN=LOC100391287<br>PE=4 SV=1 | REV_tr F7<br>GQB0 F7<br>GQB0_CA<br>LJA                                                                                                                                                                                                                                                                      | aGE<br>QLAk             | 67% | 32.9 | 50.78693 | Ref | 0.2   | 0.042 | 0.36  | 0.098 | 0.19  | 0.1   | 0.24  | 22100 | 22100 | 21500 | 30100 | 27600 | 25600 | 25300 | 27600 | 662.9 | 1323.8 | 2 | 0.0221 | 16.66 |
| Heterogeneous nuclear ribonucleoprotein U<br>OS=Mus musculus<br>GN=Hnrnpu PE=1<br>SV=1      | 3 HNRPU_MOUSE,t<br>r B4DLR3<br> B4DLR3_<br>HUMAN,t<br>r F1MMU<br>2 F1MM<br>U2_BOVI<br>N,tr F7G<br>WA9 F7G<br>WA9_MA<br>CMU,tr O<br>88568 O8<br>8568_MO<br>USE,tr Q3<br>TGN5 Q3<br>TGN5_M<br>OUSE,tr <br>Q3TS50 <br>Q3TS50_<br>MOUSE,tr<br> Q3TVV6 <br>Q3TVV6_<br>MOUSE,tr<br> Q3TWN5<br> Q3TWN5<br>_MOUSE,t | qGQ<br>QQA<br>GGD<br>Gk | 67% | 35.6 | 53.06217 | Ref | 0.013 | 0.028 | -0.35 | -0.49 | -0.24 | -0.51 | -0.13 | 5350  | 4690  | 5140  | 4430  | 4460  | 4620  | 4010  | 5160  | 561.3 | 1680.9 | 3 | 0.0135 | 8.049 |
| Bucentaur-2<br>OS=Bos taurus<br>GN=p97bcnt2 PE=2<br>SV=1                                    | tr A0JBZ9<br> A0JBZ9_<br>BOVIN                                                                                                                                                                                                                                                                              | vFDI<br>AGEk            | 67% | 34.4 | 51.83031 | Ref | 0.013 | -0.17 | -0.08 | -0.24 | 0.055 | -0.3  | -0.02 | 11200 | 9850  | 9420  | 11300 | 11100 | 11900 | 9690  | 11700 | 496.3 | 1485.8 | 3 | 0.0236 | 15.84 |

|                                                                                |                                                                                                                                                                                                                                |                          |            |             |                 |            |               |              |             |               |             |              |              |             |             |             |             |             |             |             |             |              |               |          |               |              |
|--------------------------------------------------------------------------------|--------------------------------------------------------------------------------------------------------------------------------------------------------------------------------------------------------------------------------|--------------------------|------------|-------------|-----------------|------------|---------------|--------------|-------------|---------------|-------------|--------------|--------------|-------------|-------------|-------------|-------------|-------------|-------------|-------------|-------------|--------------|---------------|----------|---------------|--------------|
| <p>WD repeat-containing protein 44 OS=Homo sapiens GN=WDR44 PE=1 SV=1</p>      | <p>3 WDR44_HUMAN,sp Q6NV E8 WDR44_MOUSE,sp Q9XC3 WDR44_BOVIN, tr A5PK07 A5PK07_BOVIN, tr B1AXB8 B1AXB8_MOUSE, tr B4DSE9 B4DSE9_HUMAN, tr B7Z947 B7Z947_HUMAN, tr D2H3B6 D2H3B6_AILME, tr E2RPX4 E2RPX4_CANFA, tr E9PCI7 E9</p> | <p>IPTGI NPLT LHIM R</p> | <p>67%</p> | <p>34.6</p> | <p>52.09416</p> | <p>Ref</p> | <p>0.33</p>   | <p>0.25</p>  | <p>1.8</p>  | <p>1.4</p>    | <p>0.51</p> | <p>2.5</p>   | <p>2.2</p>   | <p>1340</p> | <p>1460</p> | <p>1500</p> | <p>5040</p> | <p>4040</p> | <p>1950</p> | <p>8050</p> | <p>6320</p> | <p>627.4</p> | <p>1879.1</p> | <p>3</p> | <p>0.0104</p> | <p>5.508</p> |
| <p>Growth arrest-specific protein 8 OS=Rattus norvegicus GN=Gas8 PE=2 SV=1</p> | <p>sp Q499U4 GAS8_RAT,sp Q60779 GAS8_MOUSE, tr A1X3U7 A1X3U7_MOUSE, tr F1LMQ8 F1LMQ8_RAT, tr Q49MD7 Q49MD7_MOUSE</p>                                                                                                           | <p>kDm RVLk</p>          | <p>66%</p> | <p>30.3</p> | <p>48.42871</p> | <p>Ref</p> | <p>-0.097</p> | <p>-0.28</p> | <p>0.14</p> | <p>-0.038</p> | <p>0.14</p> | <p>-0.24</p> | <p>-0.07</p> | <p>8420</p> | <p>6840</p> | <p>6520</p> | <p>9830</p> | <p>9570</p> | <p>9470</p> | <p>7590</p> | <p>8500</p> | <p>909.6</p> | <p>1817.1</p> | <p>2</p> | <p>0.0138</p> | <p>7.575</p> |

|                                                                                                          |                                                                                                                                                                                                                  |                    |     |     |      |          |     |       |       |       |      |       |       |       |       |       |       |       |       |       |       |       |       |        |   |        |       |
|----------------------------------------------------------------------------------------------------------|------------------------------------------------------------------------------------------------------------------------------------------------------------------------------------------------------------------|--------------------|-----|-----|------|----------|-----|-------|-------|-------|------|-------|-------|-------|-------|-------|-------|-------|-------|-------|-------|-------|-------|--------|---|--------|-------|
| T-complex protein 1 subunit gamma<br>OS=Homo sapiens<br>GN=CCT3 PE=1<br>SV=4                             | 8 TCPG_HUMAN,sp P80318 TCPG_MOUSE,sp Q29068 TCPG_PIG,sp Q3T0K2 TCPG_BOVIN,sp Q4R963 TCPG_MACFA,sp Q5NVF9 TCPG_PONAB,sp Q6P502 TCPG_RAT,tr B3KX11 B3KX11_HUMAN,tr B4DUR8 B4DUR8_HUMAN,tr D2HW70 D2HW70_AILME,tr E | eIQV<br>QHP        | AAk | 66% | 34.2 | 51.90875 | Ref | 0.077 | -0.15 | -0.07 | -0.2 | -0.17 | -0.26 | -0.12 | 15500 | 14200 | 13200 | 15600 | 15800 | 14000 | 13800 | 15000 | 577   | 1728   | 3 | 0.0118 | 6.804 |
| Putative uncharacterized protein (Fragment)<br>OS=Ailuropoda melanoleuca<br>GN=PANDA_013925<br>PE=4 SV=1 | tr D2HQ01 D2HQ01_AILME                                                                                                                                                                                           | eHE<br>GQY<br>YcTA | SNR | 66% | 27.2 | 44.89438 | Ref | 0.41  | 0.34  | 0.27  | 0.33 | 0.51  | 0.13  | 0.43  | 6180  | 7150  | 7390  | 7890  | 9030  | 8970  | 7200  | 8810  | 636.6 | 1906.8 | 3 | 0.0156 | 8.151 |

|                                                                                    |                                                                                                                                                                                                                                  |                |            |             |                 |            |              |              |              |              |              |              |              |             |             |             |             |             |             |             |             |              |               |          |               |              |
|------------------------------------------------------------------------------------|----------------------------------------------------------------------------------------------------------------------------------------------------------------------------------------------------------------------------------|----------------|------------|-------------|-----------------|------------|--------------|--------------|--------------|--------------|--------------|--------------|--------------|-------------|-------------|-------------|-------------|-------------|-------------|-------------|-------------|--------------|---------------|----------|---------------|--------------|
| <p>Cyclin-dependent kinase 11B<br/>OS=Homo sapiens<br/>GN=CDK11B PE=1<br/>SV=3</p> | <p>7 CD11B_HUMAN,sp P24788 CDK11_MOUSE,sp P46892 CDK11_RAT,sp Q9UQ88 CD11A_HUMAN,tran A2A9P5 A2A9P5_MOUSE,tran A2A9P6 A2A9P6_MOUSE,tran A4VC15 A4VC15_HUMAN,tran B4E3D9 B4E3D9_HUMAN,tran B7ZVY7 B7ZVY7_HUMAN,tran D2HN D2Hk</p> | <p>aPELLGA</p> | <p>66%</p> | <p>28.7</p> | <p>46.49598</p> | <p>Ref</p> | <p>0.4</p>   | <p>3E-04</p> | <p>0.091</p> | <p>-0.1</p>  | <p>0.057</p> | <p>-0.14</p> | <p>-0.05</p> | <p>2010</p> | <p>2300</p> | <p>1890</p> | <p>2260</p> | <p>2180</p> | <p>2130</p> | <p>1940</p> | <p>2040</p> | <p>507.3</p> | <p>1519</p>   | <p>3</p> | <p>0.0068</p> | <p>4.49</p>  |
| <p>F-box only protein 24<br/>OS=Homo sapiens<br/>GN=FBXO24 PE=2<br/>SV=2</p>       | <p>75426 FBX24_HUMAN,REV_sp Q4R327 FBX24_MACFA,REV_tr A4D2D3 A4D2D3_HUMAN,sp O75525 KHDR3_HUMAN,sp P18052 PTPRA_MOUSE,sp P18433 PTPRA_HUMAN,sp Q03348 PTPRA_RAT,sp Q07666 KHDR1_HUMAN,sp Q5VWX1 KHDR2_HUMAN,tran Vk</p>          | <p>vLLP</p>    | <p>66%</p> | <p>19.6</p> | <p>37.40678</p> | <p>Ref</p> | <p>-0.34</p> | <p>-0.43</p> | <p>-0.08</p> | <p>-0.53</p> | <p>-0.18</p> | <p>-0.43</p> | <p>-0.38</p> | <p>3370</p> | <p>2320</p> | <p>2360</p> | <p>3370</p> | <p>2730</p> | <p>3020</p> | <p>2660</p> | <p>2730</p> | <p>426.3</p> | <p>1275.9</p> | <p>3</p> | <p>0.0215</p> | <p>16.85</p> |

|                                                                      |                                                                                                                                                                                                                                                         |             |     |      |          |     |        |       |       |       |       |       |       |      |      |      |      |      |      |      |      |       |        |   |        |       |
|----------------------------------------------------------------------|---------------------------------------------------------------------------------------------------------------------------------------------------------------------------------------------------------------------------------------------------------|-------------|-----|------|----------|-----|--------|-------|-------|-------|-------|-------|-------|------|------|------|------|------|------|------|------|-------|--------|---|--------|-------|
| SWI/SNF complex subunit SMARCC1 OS=Mus musculus GN=Smarcc1 PE=1 SV=2 | 6 SMRC1_MOUSE,sp Q6PDG5 SMRC2_MOUSE,sp Q8TAQ2 SMRC2_HUMAN,sp Q92922 SMRC1_HUMAN,transcript B4DF22 B4DF22_HUMAN,transcript B4DYF9 B4DYF9_HUMAN,transcript B4DYQ1 B4DYQ1_HUMAN,transcript D2GVA3 D2GVA3_ALME,transcript D2H346 D2H346_AILME,transcript D3 | tQDEcILHFLR | 66% | 34.2 | 51.99986 | Ref | 0.0039 | 0.064 | -0.59 | -0.26 | -0.43 | 0.042 | -0.38 | 1490 | 1300 | 1470 | 1050 | 1460 | 1130 | 1640 | 1210 | 575.6 | 1723.9 | 3 | 0.0082 | 4.762 |
| Dynamin-2 OS=Bos taurus GN=DNM2 PE=2 SV=1                            | 6H715 DYN2_BOVIN,REV_sp P39052 DYN2_RAT,REV_sp P39054 DYN2_MOUSE,REV_sp P50570 DYN2_HUMAN,REV_transcript A8K1B6 A8K1B6_HUMAN,REV_transcript B3KUU8 B3KUU8_HUMAN,REV_transcript B4DJ53 B4DJ53_HUMAN,REV_transcript D2HGX7 D2HGX7_AILME,transcript D      | iLNDLPLMKK  | 65% | 32.3 | 50.58714 | Ref | -0.21  | -0.86 | -0.23 | -0.59 | -0.26 | -0.59 | -0.41 | 1230 | 919  | 636  | 1110 | 948  | 1040 | 869  | 976  | 745   | 1487.9 | 2 | 0.0108 | 7.28  |

|                                                                                                 |                                                                                                                                                                                                                    |                   |     |      |          |     |        |       |       |        |      |       |       |       |       |       |       |       |       |       |       |       |        |   |        |       |
|-------------------------------------------------------------------------------------------------|--------------------------------------------------------------------------------------------------------------------------------------------------------------------------------------------------------------------|-------------------|-----|------|----------|-----|--------|-------|-------|--------|------|-------|-------|-------|-------|-------|-------|-------|-------|-------|-------|-------|--------|---|--------|-------|
| Putative uncharacterized protein (Fragment) OS=Ailuropoda melanoleuca GN=PANDA_007126 PE=4 SV=1 | REV_tr D2H9U4 D2H9U4_AILME,REV_tr F1PRF9 F1PRF9_CANFA                                                                                                                                                              | EPFV NNT k        | 65% | 32.5 | 50.76251 | Ref | 0.51   | 0.47  | 0.72  | 0.51   | 0.4  | 0.85  | 0.48  | 44300 | 55000 | 57900 | 77200 | 73600 | 59400 | 84700 | 65400 | 626.9 | 1251.7 | 2 | 0.017  | 13.56 |
| Uncharacterized protein OS=Bos taurus GN=Bt.36741 PE=4 SV=1                                     | tr E1B7F5 E1B7F5_BOVIN                                                                                                                                                                                             | vVDE SQET ENQ EEK | 65% | 35.3 | 53.32186 | Ref | -0.027 | -0.09 | -0.04 | -0.057 | 0.42 | -0.22 | 0.052 | 6500  | 5550  | 5740  | 6680  | 7290  | 8840  | 5940  | 7110  | 758   | 2271.1 | 3 | 0.0148 | 6.524 |
| 60S ribosomal protein L19 OS=Canis familiaris GN=RPL19 PE=1 SV=1                                | Q5 RL19_CANFA,sp P84098 RL19_HUMAN,sp P84099 RL19_MOUSE,sp P84100 RL19_RAT,sp Q3TOW9 RL19_BOVIN,sp Q5RB99 RL19_PONAB,sp Q8HXN9 RL19_MACFA,sp A2A547 A2A547_MOUSE,sp D2H531 D2H531_AILME,sp F1M5A9 F1M5A9_RAT,sp F1 | ILAD QAE AR       | 64% | 32.8 | 51.33418 | Ref | 0.31   | 0.11  | 0.4   | 0.078  | 0.55 | -0.06 | 0.47  | 46100 | 49500 | 46800 | 64500 | 56700 | 68500 | 47100 | 67300 | 645.9 | 1289.7 | 2 | 0.0108 | 8.393 |

|                                                                                          |                                                                                                                                                                                                                                    |                            |            |             |                 |            |              |              |              |               |              |              |              |              |             |              |             |              |             |              |             |              |               |          |               |              |
|------------------------------------------------------------------------------------------|------------------------------------------------------------------------------------------------------------------------------------------------------------------------------------------------------------------------------------|----------------------------|------------|-------------|-----------------|------------|--------------|--------------|--------------|---------------|--------------|--------------|--------------|--------------|-------------|--------------|-------------|--------------|-------------|--------------|-------------|--------------|---------------|----------|---------------|--------------|
| <p>26S proteasome non-ATPase regulatory subunit 13 OS=Bos taurus GN=PSMD13 PE=2 SV=1</p> | <p>4 PSD13_BOVIN,sp Q9UNM6 PSD13_HUMAN,ter A6MKV9 A6MKV9_CALJA,ter B2RBM7 B2RBM7_HUMAN,tri B4DJ66 B4DJ66_HUMAN,tri D2I616 D2I616_AILME,ter E2QV21 E2QV21_CANFA,tri E2R5N5 E2R5N5_CANFA,tri F1RGC9 F1RGC9_PIG,tri F6X6G5 F6X6G5</p> | <p>sME MLV EHQ AHDI LT</p> | <p>64%</p> | <p>34.5</p> | <p>52.59988</p> | <p>Ref</p> | <p>0.2</p>   | <p>-0.12</p> | <p>0.2</p>   | <p>-0.038</p> | <p>-0.06</p> | <p>-0.14</p> | <p>-0.15</p> | <p>2080</p>  | <p>2090</p> | <p>1810</p>  | <p>2540</p> | <p>2370</p>  | <p>2040</p> | <p>2010</p>  | <p>1990</p> | <p>686.7</p> | <p>2057</p>   | <p>3</p> | <p>0.0124</p> | <p>6.015</p> |
| <p>TMEM119 protein OS=Bos taurus GN=TMEM119 PE=2 SV=1</p>                                | <p>tr A2VE84 A2VE84_BOVIN,tri F1N070 F1N070_BOVIN</p>                                                                                                                                                                              | <p>aAPS SGDL AR</p>        | <p>64%</p> | <p>32.2</p> | <p>50.72754</p> | <p>Ref</p> | <p>-0.34</p> | <p>1.9</p>   | <p>-0.83</p> | <p>0.054</p>  | <p>-0.62</p> | <p>1.7</p>   | <p>-0.89</p> | <p>12100</p> | <p>8300</p> | <p>43600</p> | <p>7170</p> | <p>14600</p> | <p>7980</p> | <p>41300</p> | <p>6850</p> | <p>624.8</p> | <p>1247.7</p> | <p>2</p> | <p>0.0127</p> | <p>10.15</p> |

|                                                                                    |                                                                                                                                                                                                                                                 |              |     |      |          |     |        |       |      |        |       |       |       |       |       |       |       |       |       |       |       |       |        |  |   |        |       |
|------------------------------------------------------------------------------------|-------------------------------------------------------------------------------------------------------------------------------------------------------------------------------------------------------------------------------------------------|--------------|-----|------|----------|-----|--------|-------|------|--------|-------|-------|-------|-------|-------|-------|-------|-------|-------|-------|-------|-------|--------|--|---|--------|-------|
| CTP synthase 1<br>OS=Homo sapiens<br>GN=CTPS PE=1<br>SV=2                          | 2 PYRG1_ HUMAN,s p P70698  PYRG1_ MOUSE,tr  A0JNE9  A0JNE9_B BOVIN,tr B 1AS53 B1 AS53_MO USE,tr B1 WC02 B1 WC02_RA T,tr B4DR 64 B4DR6 4_HUMA N,tr B4E1 E0 B4E1E 0_HUMA N,tr F6W FF7 F6WF F7_MON DO,tr F7A SP8 F7AS P8_CALJA, tr F7CKK2  F7CKK2_ | fVG QDV EGER | 64% | 32.1 | 50.71363 | Ref | -0.042 | -0.24 | -0.1 | -0.13  | 0.055 | -0.41 | -0.17 | 12600 | 10700 | 10100 | 12500 | 13500 | 13400 | 10100 | 11800 | 720.4 | 1438.7 |  | 2 | 0.0145 | 10.08 |
| Serine/arginine-rich splicing factor 5<br>OS=Mus musculus<br>GN=Srsf5 PE=1<br>SV=1 | 6 SRSF5_ MOUSE,s p Q09167  SRSF5_R AT,sp Q1 3243 SRS F5_HUMA N,tr A6H7 B7 A6H7 B7_BOVIN ,tr B4DJK 0 B4DJK0 _HUMAN, tr B4DUA 4 B4DUA 4_HUMA N,tr B5B UD8 B5B UD8_HU MAN,tr D 2H5R1 D 2H5R1_AI LME,tr E2 R8E5 E2R 8E5_CANF A,tr E9QK W3 E9QK      | vTIE HAR     | 64% | 31.6 | 49.78322 | Ref | 0.038  | 0.042 | 0.5  | -0.006 | 0.39  | -0.11 | 0.11  | 20700 | 18400 | 20100 | 30900 | 24000 | 27500 | 20300 | 23500 | 377.2 | 1128.6 |  | 3 | 0.0102 | 8.995 |





|                                                                                           |                                                                                                                                                                                                          |               |     |      |          |     |       |      |       |       |      |      |      |      |      |      |       |       |       |      |       |       |        |   |        |       |
|-------------------------------------------------------------------------------------------|----------------------------------------------------------------------------------------------------------------------------------------------------------------------------------------------------------|---------------|-----|------|----------|-----|-------|------|-------|-------|------|------|------|------|------|------|-------|-------|-------|------|-------|-------|--------|---|--------|-------|
| Neudesin OS=Bos taurus GN=NENF PE=2 SV=1                                                  | sp Q1JQA5 NENF_BOVIN,sp Q6IUR5 NENF_RAT,sp Q9CQ45 NENF_MOUSE,sp Q9UMX5 NENF_HUMAN, tr F1PUL1 F1PUL1_CANFA, tr F1S2V9 F1S2V9_PIG, tr F6Q4X8 F6Q4X8_MONDO, tr F6UN10 F6UN10_MACMU, tr F6XKX8 F6XKX8_OR_NAN | gVVF DVTS Gk  | 63% | 34.1 | 52.48422 | Ref | -0.05 | -0   | 0.064 | 0.062 | 0.43 | -0.1 | 0.11 | 9410 | 7900 | 8860 | 10400 | 11500 | 12900 | 9350 | 10700 | 539.6 | 1615.9 | 3 | 0.0239 | 14.8  |
| BH3 interacting domain death agonist transcript variant 2 OS=Bos taurus GN=BID2 PE=2 SV=1 | tr Q05KI5 Q05KI5_BOVIN, tr Q05KI6 Q05KI6_BOVIN, tr Q17QH5 Q17QH5_BOVIN                                                                                                                                   | tQLL LTM LLak | 62% | 28   | 46.4874  | Ref | -1.5  | -1.3 | -1.4  | -1.2  | -1.5 | -1.9 | -1.7 | 475  | 145  | 183  | 192   | 242   | 175   | 132  | 155   | 618.4 | 1852.2 | 3 | 0.0081 | 4.379 |

|                                                                                   |                                                                                                                                                                                                                                                                                                                                                                                                                                   |      |     |     |      |          |     |      |       |      |       |     |       |      |      |      |      |      |      |      |      |      |       |        |   |        |       |
|-----------------------------------------------------------------------------------|-----------------------------------------------------------------------------------------------------------------------------------------------------------------------------------------------------------------------------------------------------------------------------------------------------------------------------------------------------------------------------------------------------------------------------------|------|-----|-----|------|----------|-----|------|-------|------|-------|-----|-------|------|------|------|------|------|------|------|------|------|-------|--------|---|--------|-------|
| Cyclic AMP-dependent transcription factor ATF-1 OS=Homo sapiens GN=ATF1 PE=1 SV=2 | 6 ATF1_HUMAN,sp P81269 ATF1_MOUSE,sp Q08DA8 ATF1_BOVIN,tr B2R8K4 B2R8K4_HUMAN,tr D2HF5 D2HF5_AILME,tr E9PWM8 E9PWM8_MOUSE,tr E9PZ49 E9PZ49_MOUSE,tr E9Q356 E9Q356_MOUSE,tr F6YIC3 F6YIC3_HORSE,tr F7BRQ2 F7BRQ2 Z02_CANFA,sp Q9Z0U1 Z02_MOUSE,tr A6QF3 A6QF3_BOVIN,tr D2GZ5 D2GZ5_AILME,tr D3ZUD2 D3ZUD2_RAT,tr E9PT08 E9PT08_RAT,tr E9PTS1 E9PTS1_RAT,tr F1MBN2 F1MBN2_BOVIN,tr F1MTP9 F1MTP9_BOVIN,tr F1PEE3 F1PEE3_CANFA,tr F1 | mED  | SHk | 62% | 27.1 | 46.10745 | Ref | 0.08 | 0.096 | 0.24 | 0.015 | 0.5 | -0.69 | 0.29 | 486  | 447  | 490  | 609  | 573  | 700  | 320  | 629  | 554.8 | 1107.5 | 2 | 0.0053 | 4.815 |
| Tight junction protein ZO-2 OS=Canis familiaris GN=TJP2 PE=1 SV=1                 | 8 Z02_CANFA,sp Q9Z0U1 Z02_MOUSE,tr A6QF3 A6QF3_BOVIN,tr D2GZ5 D2GZ5_AILME,tr D3ZUD2 D3ZUD2_RAT,tr E9PT08 E9PT08_RAT,tr E9PTS1 E9PTS1_RAT,tr F1MBN2 F1MBN2_BOVIN,tr F1MTP9 F1MTP9_BOVIN,tr F1PEE3 F1PEE3_CANFA,tr F1                                                                                                                                                                                                               | iAAI | VVk | 61% | 20.1 | 38.78177 | Ref | 0.75 | -0.29 | 0.67 | 1.3   | 1.3 | 1.1   | 0.34 | 2460 | 3590 | 1900 | 4160 | 7090 | 6000 | 5550 | 3280 | 441.3 | 1320.9 | 3 | 0.0029 | 2.16  |

|                                                                               |                                                                                                                                                                                                                                                 |          |     |      |          |     |        |       |       |        |       |       |       |       |       |       |       |       |       |       |       |       |        |   |        |       |
|-------------------------------------------------------------------------------|-------------------------------------------------------------------------------------------------------------------------------------------------------------------------------------------------------------------------------------------------|----------|-----|------|----------|-----|--------|-------|-------|--------|-------|-------|-------|-------|-------|-------|-------|-------|-------|-------|-------|-------|--------|---|--------|-------|
| Alanyl-tRNA editing protein Aarsd1<br>OS=Bos taurus<br>GN=AARSD1 PE=2<br>SV=1 | 1 AASD1_ BOVIN,sp  Q3THG9  AASD1_ MOUSE,s p Q5XI97  AASD1_ RAT,sp Q 9BTE6 AA SD1_HUM AN,tr A2 A4P3 A2 A4P3_MO USE,tr A2 A4P4 A2 A4P4_MO USE,tr A2 AI35 A2A I35_MOU SE,tr B3K SP9 B3KS P9_HUMA N,tr B4DI 73 B4DI7 3_HUMA N,tr C9J5 N1 C9J5N GPIR | gLPD DHA | 61% | 33.6 | 52.20791 | Ref | -4E-04 | -0.12 | -0.01 | -0.12  | -0.16 | -0.52 | -0.1  | 12100 | 10500 | 10500 | 12700 | 13000 | 11000 | 8910  | 11900 | 484.6 | 1450.8 | 3 | 0.009  | 6.228 |
| Lactase-phlorizin hydrolase<br>OS=Oryctolagus cuniculus GN=LCT<br>PE=1 SV=1   | 09849 LP H_RABIT, REV_tr Q 29518 Q2 9518_RAB IT,REV_tr  Q29519  Q29519_R ABIT,sp P 61289 PS ME3_HU MAN,sp P 61290 PS ME3_MO USE,sp P6 1291 PS ME3_PIG, sp Q4R4V 3 PSME3 _MACFA,s p Q5RFD 3 PSME3 _PONAB,s p Q9H4K 7 GTPB5_ HUMAN,s p Q9NRA      | vDQ qVq  | 61% | 32.2 | 51.1956  | Ref | 0.025  | -0.12 | 0.052 | -0.032 | -0.09 | -0.17 | -0.24 | 30200 | 26800 | 26300 | 33200 | 34500 | 28900 | 28600 | 27000 | 663.4 | 1324.8 | 2 | 0.0028 | 2.092 |

|                                                                                                 |                                                                          |               |     |      |          |     |        |       |       |       |       |       |       |      |      |      |      |      |      |      |      |       |        |   |        |       |
|-------------------------------------------------------------------------------------------------|--------------------------------------------------------------------------|---------------|-----|------|----------|-----|--------|-------|-------|-------|-------|-------|-------|------|------|------|------|------|------|------|------|-------|--------|---|--------|-------|
| Uncharacterized protein OS=Bos taurus GN=Bt.94420 PE=4 SV=1                                     | tr E1BM82 E1BM82_BOVIN, tr F1N1T3 F1N1T3_BOVIN                           | rAnG HPPE QPR | 61% | 33.5 | 52.17313 | Ref | -0.51  | -0.08 | -0.09 | -0.11 | 0.02  | -0.01 | 0.27  | 2150 | 1320 | 1930 | 2140 | 2330 | 2230 | 2280 | 2740 | 521.9 | 1562.8 | 3 | 0.0104 | 6.626 |
| Putative uncharacterized protein (Fragment) OS=Ailuropoda melanoleuca GN=PANDA_016730 PE=4 SV=1 | tr D2HW A0 D2HW A0_AILME, tr E2RLN2 E2RLN2_CANFA, tr F7DUR1 F7DUR1_HORSE | eGS VLD VLk   | 61% | 32.7 | 51.55761 | Ref | -0.36  | -0.02 | -0.48 | -0.22 | -0.07 | -0.49 | -0.05 | 3900 | 2640 | 3630 | 2960 | 3900 | 3780 | 2960 | 3970 | 523.3 | 1566.9 | 3 | 0.0183 | 11.67 |
| Uncharacterized protein OS=Sus scrofa GN=LRG1 PE=4 SV=1                                         | tr F1S7K2 F1S7K2_PIG, tr Q2KIF2 Q2KIF2_BOVIN                             | fLLP VPPQ Lk  | 61% | 26.9 | 45.73939 | Ref | -0.018 | 1.1   | 0.18  | 0.16  | -0.15 | 0.53  | 0.011 | 1840 | 1580 | 3720 | 2200 | 2400 | 1690 | 2830 | 1960 | 555   | 1662.1 | 3 | 0.0097 | 5.831 |
| Complement C3 OS=Bos taurus GN=C3 PE=1 SV=2                                                     | sp Q2UVX4 CO3_BOVIN, tr O97941 O97941_BOVIN                              | tSQG LETQ QR  | 60% | 32.7 | 51.90701 | Ref | 0.41   | 0.16  | 0.28  | 0.12  | -0.14 | 0.54  | 0.31  | 4970 | 5760 | 5250 | 6390 | 6300 | 4610 | 7710 | 6510 | 726.4 | 1450.8 | 2 | 0.0107 | 7.38  |

|                                                                       |                                                                                                                                                                                                                                                     |                                      |            |             |                 |            |               |              |              |              |             |             |              |              |              |              |              |              |              |              |              |              |               |          |               |              |
|-----------------------------------------------------------------------|-----------------------------------------------------------------------------------------------------------------------------------------------------------------------------------------------------------------------------------------------------|--------------------------------------|------------|-------------|-----------------|------------|---------------|--------------|--------------|--------------|-------------|-------------|--------------|--------------|--------------|--------------|--------------|--------------|--------------|--------------|--------------|--------------|---------------|----------|---------------|--------------|
| <p>Cadherin-13<br/>OS=Homo sapiens<br/>GN=CDH13 PE=1<br/>SV=1</p>     | <p>0 CAD13_ HUMAN,s p Q3B7N 0 CAD13_ BOVIN,sp  Q5R5W6  CAD13_P ONAB,sp  Q9WTR5  CAD13_M OUSE,tr A 8D737 A8 D737_PIG ,tr B7Z59 0 B7Z590 _HUMAN, tr B7Z9B1  B7Z9B1_ HUMAN,t r C9JRI6  C9JRI6_H UMAN,tr  D2H7K1  D2H7K1_ AILME,tr  F1M7X3  F1M7X3_</p> | <p>iNEN<br/>TGSV<br/>SVTR</p>        | <p>60%</p> | <p>33.4</p> | <p>52.6172</p>  | <p>Ref</p> | <p>-0.26</p>  | <p>-0.28</p> | <p>-0.47</p> | <p>-0.54</p> | <p>0.19</p> | <p>-1.3</p> | <p>-0.29</p> | <p>13500</p> | <p>9780</p>  | <p>10500</p> | <p>10300</p> | <p>10800</p> | <p>15600</p> | <p>5930</p>  | <p>11600</p> | <p>790.9</p> | <p>1579.8</p> | <p>2</p> | <p>0.0095</p> | <p>6.004</p> |
| <p>Laminin subunit<br/>gamma-1 OS=Homo sapiens GN=LAMC1 PE=1 SV=3</p> | <p>7 LAMC1_ HUMAN, tr D2HN9 4 D2HN9 4_AILME,t r F1MD7 7 F1MD7 7_BOVIN, tr F1PHK 9 F1PHK9 _CANFA,tr  F1S663  F1S663_Pi G,tr F6R W10 F6R W10_MO NDO,tr F 6WNY2 F 6WNY2_O RNAN,tr  F6WVB2  F6WVB2_ MACMU,t r F6XUE1  F6XUE1_ MONDO,t r F7CQA4</p>      | <p>gKTE<br/>QQT<br/>ADQ<br/>LLAR</p> | <p>60%</p> | <p>34.8</p> | <p>53.75746</p> | <p>Ref</p> | <p>-0.034</p> | <p>-0.81</p> | <p>0.016</p> | <p>-0.3</p>  | <p>0.44</p> | <p>-1</p>   | <p>0.12</p>  | <p>41900</p> | <p>35600</p> | <p>22600</p> | <p>44900</p> | <p>39900</p> | <p>58000</p> | <p>21600</p> | <p>48000</p> | <p>723.1</p> | <p>2166.2</p> | <p>3</p> | <p>0.0153</p> | <p>7.066</p> |

|                                                                                                |                                                                                                                                                                                                                                      |          |     |      |          |     |       |       |       |       |       |       |       |       |       |       |       |       |       |       |       |       |        |   |        |       |
|------------------------------------------------------------------------------------------------|--------------------------------------------------------------------------------------------------------------------------------------------------------------------------------------------------------------------------------------|----------|-----|------|----------|-----|-------|-------|-------|-------|-------|-------|-------|-------|-------|-------|-------|-------|-------|-------|-------|-------|--------|---|--------|-------|
| Uncharacterized protein (Fragment)<br>OS=Ornithorhynchus anatinus<br>GN=100081713<br>PE=4 SV=1 | REV_tr F7ET84 F7ET84_ORNAN                                                                                                                                                                                                           | IVFLLASK | 60% | 25.1 | 44.37988 | Ref | 0.063 | -0.31 | -0.59 | -0.51 | -0.18 | -0.45 | -0.19 | 56300 | 51100 | 42700 | 39500 | 46200 | 50600 | 43900 | 52200 | 597.9 | 1193.8 | 2 | 0.0227 | 19.03 |
| T-complex protein 1 subunit delta<br>OS=Homo sapiens<br>GN=CCT4 PE=1<br>SV=4                   | 1 TCPD_HUMAN,sp P80315 TCPD_MOUSE,sp Q2T9X2 TCPD_BOVIN,sp Q5R637 TCPD_PONAB,sp Q7TPB1 TCPD_RAT,sp A8K3C3 A8K3C3_HUMAN,sp B7Z2Z8 B7Z2Z8_HUMAN,sp B7Z9L0 B7Z9L0_HUMAN,sp F1N0E5 F1N0E5_BOVIN,sp F1Q331 F1Q331_CANFA,sp F1Q331_CANFA,sp | qMQVLHP  | 60% | 33.1 | 52.08775 | Ref | -0.25 | 0.1   | -0.15 | -0.37 | -0.12 | -0.34 | 0.21  | 37300 | 27300 | 37800 | 35600 | 33700 | 34800 | 31300 | 45400 | 485.6 | 1453.8 | 3 | 0.0095 | 6.558 |
| Pentraxin-related protein PTX3<br>OS=Homo sapiens<br>GN=PTX3 PE=1<br>SV=3                      | sp P26022 PTX3_HUMAN                                                                                                                                                                                                                 | mEGAEAqR | 59% | 27.3 | 46.6928  | Ref | 0.056 | -0.16 | -0.21 | -0.5  | -0.15 | -0.13 | 0.12  | 408   | 369   | 344   | 374   | 337   | 375   | 396   | 469   | 606.8 | 1211.6 | 2 | 0.0061 | 5.007 |

|                                                                              |                                                                                                                                                                                                                                |                         |     |    |          |     |      |      |       |       |       |       |       |       |       |       |       |       |       |       |       |       |        |   |        |       |
|------------------------------------------------------------------------------|--------------------------------------------------------------------------------------------------------------------------------------------------------------------------------------------------------------------------------|-------------------------|-----|----|----------|-----|------|------|-------|-------|-------|-------|-------|-------|-------|-------|-------|-------|-------|-------|-------|-------|--------|---|--------|-------|
| Hemopexin OS=Bos taurus GN=HPX PE=2 SV=1                                     | sp Q3SZV7 HEMO_BOVIN                                                                                                                                                                                                           | dAPS<br>PVD<br>AAF<br>R | 59% | 32 | 51.31747 | Ref | 0.35 | 0.21 | 0.066 | 0.11  | -0.23 | 0.74  | 0.29  | 18900 | 20900 | 20700 | 21000 | 23900 | 16400 | 33600 | 24500 | 725.4 | 1448.7 | 2 | 0.0089 | 6.136 |
| Inorganic pyrophosphatase 2, mitochondrial OS=Homo sapiens GN=PPA2 PE=1 SV=2 | U2 IPYR2_HUMAN, tr A8KOP2 A8KOP2_HUMAN, tr D7NYK1 D7NYK1_SCOKU, tr D7NYK2 D7NYK2_D7NYK2_MINSC, tr D7NYK3 D7NYK3_CYNBP, tr E2QRM6 E2QRM6_HUMAN, tr F6PMS8 F6PMS8_MACMU, tr F6PMT8 F6PMT8_MACMU, tr F6PN84 F6PN84_MACMU, tr F6PN | aFAL<br>EVIK            | 59% | 30 | 49.16048 | Ref | 0.16 | -0.2 | 0.007 | -0.26 | -0.15 | -0.33 | -0.16 | 3340  | 3240  | 2750  | 3550  | 3260  | 3060  | 2830  | 3160  | 500.3 | 1497.9 | 3 | 0.0214 | 14.26 |



|                                                                                |                                                                                                                                                                                                                             |                          |     |      |          |     |      |      |       |        |      |      |      |       |       |       |       |       |       |       |       |       |        |   |        |       |
|--------------------------------------------------------------------------------|-----------------------------------------------------------------------------------------------------------------------------------------------------------------------------------------------------------------------------|--------------------------|-----|------|----------|-----|------|------|-------|--------|------|------|------|-------|-------|-------|-------|-------|-------|-------|-------|-------|--------|---|--------|-------|
| Actin-related protein 2/3 complex subunit 5 OS=Homo sapiens GN=ARPC5 PE=1 SV=3 | 1 ARPC5_HUMAN,sp Q3SYX9 ARPC5_BOVIN,sp Q4KLF8 ARPC5_RAT,sp Q5R516 ARPC5_PONAB,sp Q9CPW4 ARPC5_MOUSE,tr B5APV0 B5APV0_PIG,tr D3ZUQ6 D3ZUQ6_RA T,tr D4A366 D4A366_RAT,tr E2RD65 E2RD65_C ANFA,tr F1S658 F1S658_PIG, tr F6VU8R | aLAA<br>GGV<br>GSIV<br>R | 59% | 31   | 50.45534 | Ref | 0.1  | 0.12 | 0.17  | 0.31   | 0.43 | 0.23 | 0.14 | 43600 | 40600 | 44800 | 52100 | 63000 | 59900 | 54600 | 50800 | 687.9 | 1373.8 | 2 | 0.011  | 7.969 |
| Enhancer of rudimentary homolog OS=Mus musculus GN=Erh1_MACM PE=1 SV=1         | 9 ERH_MOUSE,sp P84090 ERH_HUMAN,sp Q3SZC0 ERH_BOVIN,tr B2RYQ5 B2RYQ5_RAT,tr E1BKC7 E1BKC7_BOVIN,tr E2RKE8 E2RKE8_CANFA, tr F2Z5J5 F2Z5J5_PIG,tr F7AUD4 F7AUD4_HORSE,tr F7E9A4 F7E9A4_CALI A,tr F7EDC1 F7EDC1_MACM U,tr Q4FZ | sHTI<br>LLVQ<br>PTK      | 59% | 32.6 | 52.06737 | Ref | 0.29 | 0.11 | 0.056 | -0.028 | 0.25 | 0.1  | 0.22 | 5010  | 5320  | 5100  | 5520  | 5730  | 6070  | 5730  | 6150  | 792   | 1581.9 | 2 | 0.0128 | 8.076 |

|                                                                                                |                                                                                                                                                                                                                                        |                                  |            |             |                 |            |             |             |              |               |             |              |             |              |              |              |              |              |              |              |              |              |               |          |               |              |
|------------------------------------------------------------------------------------------------|----------------------------------------------------------------------------------------------------------------------------------------------------------------------------------------------------------------------------------------|----------------------------------|------------|-------------|-----------------|------------|-------------|-------------|--------------|---------------|-------------|--------------|-------------|--------------|--------------|--------------|--------------|--------------|--------------|--------------|--------------|--------------|---------------|----------|---------------|--------------|
| <p>N-alpha-acetyltransferase 38, NatC auxiliary subunit OS=Homo sapiens GN=NAA38 PE=1 SV=3</p> | <p>7 NAA38_HUMAN, sp Q3ZCE0 NAA38_BOVIN, sp Q5RCP3 NAA38_PONAB, sp Q6ZW M4 NAA38_MOUSE, tr A4D0 W0 A4D0 W0_HUMAN, tr B2RZ B6 B2RZ B6_RAT, tr E2R3V2 E2R3V2_C ANFA, tr F2Z2Y6 F2Z2Y6_HUMAN, tr F2Z5P9 F2Z5P9_PIG, tr F6Z555 F6Z555_</p> | <p>tVAV ITSD GR</p>              | <p>58%</p> | <p>32.5</p> | <p>51.98924</p> | <p>Ref</p> | <p>0.21</p> | <p>-0.1</p> | <p>0.083</p> | <p>-0.078</p> | <p>0.27</p> | <p>-0.17</p> | <p>0.11</p> | <p>23900</p> | <p>23900</p> | <p>21000</p> | <p>26800</p> | <p>26400</p> | <p>29300</p> | <p>22500</p> | <p>27200</p> | <p>661.9</p> | <p>1321.7</p> | <p>2</p> | <p>0.0112</p> | <p>8.466</p> |
| <p>Uncharacterized protein (Fragment) OS=Equus caballus GN=LOC100055297 PE=3 SV=1</p>          | <p>tr F6T323 F6T323_HORSE, tr F6W0J7 F6W0J7_C ALIA</p>                                                                                                                                                                                 | <p>LGEY NIEV VEG NEQ FINA Ak</p> | <p>58%</p> | <p>35.7</p> | <p>54.94922</p> | <p>Ref</p> | <p>0.28</p> | <p>0.53</p> | <p>0.65</p>  | <p>0.48</p>   | <p>0.74</p> | <p>0.11</p>  | <p>0.83</p> | <p>11700</p> | <p>12400</p> | <p>16000</p> | <p>19500</p> | <p>19100</p> | <p>19900</p> | <p>13500</p> | <p>22000</p> | <p>847.8</p> | <p>2540.3</p> | <p>3</p> | <p>0.0044</p> | <p>1.724</p> |

|                                                                                |                                                                                                                                                                                                                                                  |                      |            |             |                 |            |              |              |              |              |              |              |              |              |              |              |              |              |              |              |              |              |               |          |               |              |
|--------------------------------------------------------------------------------|--------------------------------------------------------------------------------------------------------------------------------------------------------------------------------------------------------------------------------------------------|----------------------|------------|-------------|-----------------|------------|--------------|--------------|--------------|--------------|--------------|--------------|--------------|--------------|--------------|--------------|--------------|--------------|--------------|--------------|--------------|--------------|---------------|----------|---------------|--------------|
| <p>Ubiquitin-fold modifier 1<br/>OS=Homo sapiens<br/>GN=UFM1 PE=1<br/>SV=1</p> | <p>0 UFM1_ HUMAN,s p P61961  UFM1_ MOUSE,s p Q2KJG2  UFM1_B OVIN,sp  Q4R4I2 U FM1_MA CFA,sp Q 5BJP3 UF M1_RAT,s p Q5R4N 5 UFM1_ PONAB,tr  D2HYE6  D2HYE6_ AILME,tr  D3YW97  D3YW97_ MOUSE,tr  F1Q2H2  F1Q2H2_ CANFA,tr  F6U588 F 6U588_C</p>     | <p>iTLTS DPR</p>     | <p>58%</p> | <p>32.3</p> | <p>51.8816</p>  | <p>Ref</p> | <p>-0.29</p> | <p>0.43</p>  | <p>-0.33</p> | <p>0.01</p>  | <p>-0.12</p> | <p>0.11</p>  | <p>-0.43</p> | <p>24000</p> | <p>17000</p> | <p>30400</p> | <p>20300</p> | <p>28200</p> | <p>22600</p> | <p>27500</p> | <p>18900</p> | <p>603.8</p> | <p>1205.7</p> | <p>2</p> | <p>0.0105</p> | <p>8.674</p> |
| <p>40S ribosomal protein S2 OS=Bos taurus GN=RPS2 PE=2 SV=2</p>                | <p>9 RS2_BO VIN,sp P1 5880 RS2_ HUMAN, sp P2544 4 RS2_M OUSE,sp  P27952 R S2_RAT,s p P46791  RS2_CRI GR,tr D2 HE04 D2 HE04_AIL ME,tr D3 YVC1 D3Y VC1_MO USE,tr D3 YWA0 D3 YWA0_M OUSE,tr  D3YWJ3  D3YWJ3_ MOUSE,tr  D3Z659  D3Z659_ MOUSE,tr</p> | <p>gcTA TLG NFAk</p> | <p>58%</p> | <p>33.8</p> | <p>53.10519</p> | <p>Ref</p> | <p>0.49</p>  | <p>-0.19</p> | <p>0.16</p>  | <p>-0.13</p> | <p>-0.04</p> | <p>-0.01</p> | <p>0.1</p>   | <p>16800</p> | <p>20600</p> | <p>13900</p> | <p>19900</p> | <p>17900</p> | <p>16700</p> | <p>17800</p> | <p>19100</p> | <p>579.6</p> | <p>1735.9</p> | <p>3</p> | <p>0.0082</p> | <p>4.699</p> |

|                                                                                             |                                                                                                                                                                                                                                 |                    |     |      |          |     |      |       |       |       |       |       |       |       |       |      |       |       |       |       |       |       |        |   |        |       |
|---------------------------------------------------------------------------------------------|---------------------------------------------------------------------------------------------------------------------------------------------------------------------------------------------------------------------------------|--------------------|-----|------|----------|-----|------|-------|-------|-------|-------|-------|-------|-------|-------|------|-------|-------|-------|-------|-------|-------|--------|---|--------|-------|
| 40S ribosomal protein S11<br>OS=Macaca fascicularis<br>GN=RPS11 PE=2<br>SV=3                | 0 RS11_ MACFA,sp  P62280  RS11_HUMAN,sp P62281 RS11_MOUSE,sp P62282 RS11_RAT,sp Q3TOV4 RS11_BOVIN,sp Q9XSU4 RS11_CANFA,trl D2H7V6 D2H7V6_AILME,trl D3YC01 D3YC01_AILME,trl D3Z3M6 D3Z3M6_MOUSE,trl D3ZE37 D3ZE37_RAT,trl E9PX   | VLLG<br>ETGk       | 57% | 30.6 | 49.95947 | Ref | 0.44 | -0.24 | 0.076 | -0.25 | 0.019 | -0.32 | -0.32 | 11900 | 14100 | 9520 | 13300 | 11700 | 12300 | 10200 | 10100 | 475.6 | 1423.9 | 3 | 0.0031 | 2.153 |
| Transmembrane emp24 domain-containing protein 7<br>OS=Homo sapiens<br>GN=TMED7 PE=1<br>SV=2 | 3 TMED7_HUMAN,trl A4IFT6 A4IFT6_BOVIN,trl B4E2C1 B4E2C1_HUMAN,trl D2HGS6 D2HGS6_AILME,trl D3YZZ5 D3YZZ5_MOUSE,trl D3ZTX0 D3ZTX0_RAT,trl E2R3T9 E2R3T9_CANFA,trl E9Q7G1 E9Q7G1_MOUSE,trl F1RLE5 F1RLE5_PIG,trl F6QDX4 F6QDX4_HFR | sVID<br>YQT<br>HFR | 57% | 32.7 | 52.15254 | Ref | 0.57 | 0.17  | 0.19  | 0.14  | 0.25  | 0.34  | 0.22  | 8850  | 11400 | 9380 | 10700 | 11400 | 10800 | 11900 | 10900 | 523.9 | 1568.8 | 3 | 0.012  | 7.649 |

|                                             |                                                                                                                                                                                                                             |           |     |      |          |     |        |      |       |       |       |      |       |       |       |       |       |       |       |       |       |       |        |   |        |       |
|---------------------------------------------|-----------------------------------------------------------------------------------------------------------------------------------------------------------------------------------------------------------------------------|-----------|-----|------|----------|-----|--------|------|-------|-------|-------|------|-------|-------|-------|-------|-------|-------|-------|-------|-------|-------|--------|---|--------|-------|
| SPARC OS=Mus musculus GN=Sparc PE=1 SV=1    | 4 SPRC_MOUSE,s p P09486  SPRC_HUMAN,sp  P13213 SPRC_BOVIN,sp P16975 SPRC_RAT,sp  P20112 SPRC_PIG,sp P36233 SPRC_RABIT,sp Q5R767 SPRC_PONAB,tr A4H2R5 A4H2R5_PIG,tr  A9LLG1 A9LLG1_CAPI, tr B2RDL6 B2RDL6_HUMAN, tr B4DRV4 B | IHLD YIGP | 57% | 34.5 | 53.97469 | Ref | -0.059 | 0.36 | -0.02 | 0.025 | 0.032 | 0.4  | -0.09 | 4390  | 3670  | 5320  | 4580  | 5220  | 4580  | 6180  | 4350  | 605   | 1812   | 3 | 0.0084 | 4.645 |
| Prothrombin OS=Homo sapiens GN=F2 PE=1 SV=2 | 4 THRB_HUMAN,s p P00735  THRB_BOVIN,sp  P18292 THRB_RAT,sp Q19AZ8 THRB_PIG,sp Q5R537 THRB_PONAB,tr A0N064 A0N064_MACMU, tr B3STX9 B3STX9_PIG, tr B4DDT3 B4DDT3_HUMAN, tr C8BKD1 C8BKD1_SHHEP, tr D2HHJ1 D2HHJ1_AILME, tr E2 | iYIHP R   | 57% | 30.1 | 49.54373 | Ref | 0.35   | 0.46 | 0.48  | 0.13  | 0.35  | 0.99 | -0.08 | 13100 | 14600 | 17000 | 19300 | 16700 | 17000 | 27600 | 13100 | 368.2 | 1101.7 | 3 | 0.0054 | 4.876 |

|                                                                                                      |                                                                                                                                                                                                                                                                              |                |     |      |          |     |      |       |       |        |       |       |       |       |       |       |       |       |       |       |       |       |        |   |        |       |
|------------------------------------------------------------------------------------------------------|------------------------------------------------------------------------------------------------------------------------------------------------------------------------------------------------------------------------------------------------------------------------------|----------------|-----|------|----------|-----|------|-------|-------|--------|-------|-------|-------|-------|-------|-------|-------|-------|-------|-------|-------|-------|--------|---|--------|-------|
| 26S proteasome non-ATPase regulatory subunit 11 OS=Homo sapiens GN=PSMD11 PE=1 SV=3                  | 1 PSD11_HUMAN,sp Q2K142 PSD11_BOVIN,sp Q8BG32 PSD11_MOUSE,transcript A1L5A1 A1L5A1_BOVIN,transcript B4DTS5 B4DTS5_HUMAN,transcript B5DEP6 B5DEP6_RAT,transcript D2GU64 D2GU64_AILME,transcript D3Z950 D3Z950_RAT,transcript E2RJ26 E2RJ26_CANFA,transcript F1LMZ8 F1LMZ8_RAK | tGQAAELGGLL    | 57% | 31.6 | 51.05926 | Ref | 0.11 | 0.006 | 0.023 | -0.038 | -0.07 | 0.2   | -0.05 | 13500 | 12700 | 12800 | 14500 | 15300 | 13100 | 16400 | 13800 | 589.4 | 1765   | 3 | 0.0093 | 5.25  |
| Serine/threonine-protein phosphatase PP1-gamma catalytic subunit OS=Homo sapiens GN=PPP1CC PE=1 SV=1 | 3 PP1G_HUMAN,sp P61287 PP1G_BOVIN,sp P61292 PP1B_PIG,sp P62136 PP1A_HUMAN,sp P62137 PP1A_MOUSE,sp P62138 PP1A_RAT,sp P62139 PP1A_RABIT,sp P62140 PP1B_HUMAN,sp P62141 PP1B_MOUSE,sp P62142 PP1B_RAT,sp P62143 PP1B                                                           | aHQVVE DGYEFFA | 57% | 34.5 | 54.05357 | Ref | 0.27 | 0.052 | -0.02 | -0.13  | 0.001 | -0.12 | 0.11  | 2470  | 2580  | 2410  | 2580  | 2620  | 2510  | 2410  | 2810  | 750.1 | 2247.1 | 3 | 0.0303 | 13.46 |

|                                                                                          |                                                                                                                                                                                                                     |                                                        |            |             |                 |                 |              |              |              |              |              |              |              |             |             |             |             |             |             |             |             |              |               |               |              |               |              |
|------------------------------------------------------------------------------------------|---------------------------------------------------------------------------------------------------------------------------------------------------------------------------------------------------------------------|--------------------------------------------------------|------------|-------------|-----------------|-----------------|--------------|--------------|--------------|--------------|--------------|--------------|--------------|-------------|-------------|-------------|-------------|-------------|-------------|-------------|-------------|--------------|---------------|---------------|--------------|---------------|--------------|
| <p>Hematological and neurological expressed 1 protein OS=Bos taurus GN=HN1 PE=2 SV=3</p> | <p>5 HN1_BOVIN,sp Q6AXU6 HN1_RAT,sp Q9UK76 HN1_HUMAN,tr B8ZZT7 B8ZZT7_HUMAN,tr D3ZYK6 D3ZYK6_RAT,tr F1RVX2 F1RVX2_PIG,tr F6W184 F6W184_MACMU,tr F6W1B9 F6W1B9_MACMU,tr F7A978 F7A978_HORSE,tr F7I951 F7I951_CAU</p> | <p>vLRP<br/>PGG<br/>GSN<br/>FSLG<br/>FDEP<br/>TEQP</p> | <p>VR</p>  | <p>57%</p>  | <p>35.8</p>     | <p>55.31387</p> | <p>Ref</p>   | <p>-0.49</p> | <p>-0.33</p> | <p>-0.15</p> | <p>0.028</p> | <p>0.32</p>  | <p>-0.24</p> | <p>0.17</p> | <p>874</p>  | <p>539</p>  | <p>655</p>  | <p>831</p>  | <p>1040</p> | <p>1110</p> | <p>786</p>  | <p>1040</p>  | <p>954.2</p>  | <p>2859.5</p> | <p>3</p>     | <p>0.0233</p> | <p>8.146</p> |
| <p>Uncharacterized protein OS=Canis familiaris GN=DSG4 PE=3 SV=1</p>                     | <p>REV_tr E2RKX2 E2RKX2_CANFA,REV_tr F6YF31 F6YF31_MACMU,REV_tr F6YF38 F6YF38_MACMU,REV_tr F7G259 F7G259_MACMU,s Q8K078 SO4A1_MOUSE,s Q99N01 SO4A1_RAT,tr A2ACT3 A2ACT3_MOUSE,tr Q4V8N6 Q4V8N6_RAT</p>              | <p>gEID<br/>Lk</p>                                     | <p>56%</p> | <p>31.5</p> | <p>51.07793</p> | <p>Ref</p>      | <p>-0.36</p> | <p>-0.66</p> | <p>-0.3</p>  | <p>-0.68</p> | <p>-0.35</p> | <p>-0.65</p> | <p>-0.77</p> | <p>2570</p> | <p>1740</p> | <p>1540</p> | <p>2200</p> | <p>1870</p> | <p>2050</p> | <p>1740</p> | <p>1590</p> | <p>428.3</p> | <p>1281.8</p> | <p>3</p>      | <p>0.013</p> | <p>10.14</p>  |              |

|                                                                                       |                                                                                                                                                                                                                                    |             |     |      |          |     |       |       |       |       |      |       |       |       |       |       |       |       |       |       |       |       |        |   |        |       |
|---------------------------------------------------------------------------------------|------------------------------------------------------------------------------------------------------------------------------------------------------------------------------------------------------------------------------------|-------------|-----|------|----------|-----|-------|-------|-------|-------|------|-------|-------|-------|-------|-------|-------|-------|-------|-------|-------|-------|--------|---|--------|-------|
| SH3 domain-binding glutamic acid-rich-like protein OS=Bos taurus GN=SH3BGRL PE=3 SV=1 | sp Q58DU7 SH3L1_BOVIN, tr B5DFD8 B5DFD8_RAT, tr F1MBW7 F1MBW7_BOVIN, tr F6RMM1 F6RMM1_HORSE, tr F6SVIO F6SVIO_MACMU, tr Q5T3H5 Q5T3H5_HUMAN                                                                                        | eAEA<br>QAK | 56% | 31.8 | 51.65363 | Ref | 0.021 | -0.12 | 0.1   | 0.042 | 0.52 | -0.4  | 0.12  | 17400 | 15300 | 15100 | 19800 | 20900 | 25400 | 14100 | 19900 | 677.9 | 1353.8 | 2 | 0.0029 | 2.145 |
| tRNA-splicing ligase RtcB homolog OS=Papio anubis PE=3 SV=1                           | 2 RTCB_PAPAN, sp Q19PY3 RTCB_PIG, sp Q4R6X4 RTCB_MACFA, sp Q5E9T9 RTCB_BOVIN, sp Q6AYT3 RTCB_RAT, sp Q99LF4 RTCB_MOUSE, sp Q9Y3I0 RTCB_HUMAN, tr B0KWT0 B0KWT0_CALJA, tr B1MTS3 B1MTS3_CALMO, tr B2KIH7 B2KIH7_RHIFE, tr B3RF81 B3 | tLLV<br>HR  | 56% | 29.1 | 48.77291 | Ref | 0.17  | -0.15 | -0.18 | -0.51 | -0.1 | -0.02 | -0.62 | 4600  | 4500  | 3900  | 4290  | 3770  | 4360  | 4820  | 3170  | 348.2 | 1041.7 | 3 | 0.0038 | 3.602 |



|                                                                                            |                                                                                                                                                                                                                                                                               |                  |     |      |          |     |       |       |                           |       |                            |       |       |      |      |      |                           |      |                            |      |      |       |        |   |        |       |
|--------------------------------------------------------------------------------------------|-------------------------------------------------------------------------------------------------------------------------------------------------------------------------------------------------------------------------------------------------------------------------------|------------------|-----|------|----------|-----|-------|-------|---------------------------|-------|----------------------------|-------|-------|------|------|------|---------------------------|------|----------------------------|------|------|-------|--------|---|--------|-------|
| Wiskott-Aldrich syndrome protein family member 2<br>OS=Bos taurus<br>GN=WASF2 PE=2<br>SV=1 | sp A2VDK6 WASF2_BOVIN,transcript F1ME13 F1ME13_BOVIN,transcript F1STN6 F1STN6_PIG                                                                                                                                                                                             | sSTV<br>QDQ      | 56% | 31.9 | 51.87035 | Ref | 0.15  | -0.19 | 0.057                     | 0.047 | 0.3                        | 0.004 | 0.43  | 5500 | 5290 | 4530 | 6060                      | 6630 | 6910                       | 5870 | 7830 | 750.9 | 1499.8 | 2 | 0.0067 | 4.463 |
| Src kinase-associated phosphoprotein 1<br>OS=Mus musculus<br>GN=Skap1 PE=1<br>SV=1         | 3UUV5 SKAP1_MOUSE,REV_transcript Q4V7G1 SKAP1_RAT,REV_transcript Q86WV1 SKAP1_HUMAN,REV_transcript Q9WUQ1 ATS1_RAT,REV_transcript A2A881 A2A881_MOUSE,REV_transcript A8K453 A8K453_HUMAN,REV_transcript A8Y5F0 A8Y5F0_MOUSE,REV_transcript A8Y5F1 A8Y5F1_MOUSE,REV_transcript | gLIH<br>R        | 55% | 27.7 | 47.51349 | Ref | 0.15  | -0.22 | Value Missing (-2.381706) | -0.26 | Value Missing (-2.3263128) | -0.29 | -0.74 | 3140 | 3030 | 2550 | Value Missing (-2.381706) | 3050 | Value Missing (-2.3263128) | 2730 | 1980 | 300.5 | 898.56 | 3 | 0.0035 | 3.904 |
| Craniofacial development protein 2<br>OS=Tragulus javanicus<br>GN=CFDP2 PE=2<br>SV=1       | sp Q588U8 CFDP2_TRAJA,sp Q8HXY9 CFDP1_BOVIN,transcript B6F237 B6F237_CAPHI                                                                                                                                                                                                    | gVES<br>EDA<br>R | 55% | 29.2 | 49.25317 | Ref | -0.31 | -0.33 | -0.25                     | -0.28 | 0.17                       | -0.7  | -0.16 | 8240 | 5760 | 6170 | 7350                      | 7940 | 9450                       | 5410 | 7810 | 583.8 | 1165.6 | 2 | 0.0088 | 7.508 |

|                                                                                                 |                                                                                                                                                                                                                         |            |     |      |          |     |       |       |       |       |       |       |       |       |       |       |        |        |       |       |        |       |        |   |        |       |
|-------------------------------------------------------------------------------------------------|-------------------------------------------------------------------------------------------------------------------------------------------------------------------------------------------------------------------------|------------|-----|------|----------|-----|-------|-------|-------|-------|-------|-------|-------|-------|-------|-------|--------|--------|-------|-------|--------|-------|--------|---|--------|-------|
| Putative uncharacterized protein (Fragment) OS=Ailuropoda melanoleuca GN=PANDA_015251 PE=4 SV=1 | 2HT16 D2 HT16_AIL ME,REV_tr D2HWC9 D2HWC9_AILME,REV_tr E2 QWJ0 E2 QWJ0_CANFA,REV_tr E2RMC1 E2RMC1_CANFA,REV_tr F1 PMD5 F1 PMD5_CANFA,REV_tr F7FN86 F7FN86_MONDO,sp P51587 BRCA2_HUMAN,sp Q8C863 ITCH_MOUSE,sp Q96J02 IT | elDn qK    | 55% | 28.8 | 48.90974 | Ref | -0.51 | 0.35  | -0.63 | -0.33 | -0.55 | -0.14 | -0.48 | 2E+05 | 93100 | 2E+05 | 104000 | 142000 | 1E+05 | 1E+05 | 115000 | 526.8 | 1051.5 | 2 | 0.0011 | 1.063 |
| Endothelial protein C receptor OS=Bos taurus GN=PROCR PE=2 SV=1                                 | sp Q28105 EPCR_BOVIN                                                                                                                                                                                                    | gVTF PLIIR | 54% | 29   | 49.30322 | Ref | -0.33 | -0.88 | -0.09 | 0.34  | 0.66  | -0.74 | 0.032 | 7530  | 5220  | 3870  | 7490   | 11100  | 12100 | 4800  | 8130   | 660.4 | 1318.8 | 2 | 0.0072 | 5.445 |

|                                                                                                   |                                                                                                                                                                                                                                                                                                                            |                             |     |      |          |     |        |       |       |       |       |       |       |      |      |      |      |      |      |      |      |       |        |   |        |       |
|---------------------------------------------------------------------------------------------------|----------------------------------------------------------------------------------------------------------------------------------------------------------------------------------------------------------------------------------------------------------------------------------------------------------------------------|-----------------------------|-----|------|----------|-----|--------|-------|-------|-------|-------|-------|-------|------|------|------|------|------|------|------|------|-------|--------|---|--------|-------|
| Peptidyl-prolyl cis-trans isomerase<br>NIMA-interacting 1<br>OS=Homo sapiens<br>GN=PIN1 PE=1 SV=1 | 6 PIN1_H<br>UMAN,sp<br> Q4R383 <br>PIN1_MA<br>CFA,sp Q<br>5BIN5 PI<br>N1_BOVI<br>N,tr B3KU<br>M4 B3KU<br>M4_HUM<br>AN,tr D2<br>HGV6 D2<br>HGV6_AIL<br>ME,tr E7E<br>QR5 E7E<br>QR5_HU<br>MAN,tr F<br>1P6C1 F1<br>P6C1_CA<br>NFA,tr F1<br>S3G5 F1S<br>3G5_PIG,t<br>r F7BLZ7 <br>F7BLZ7_H<br>ORSE,tr F<br>7HDX7 F7<br>HDX7_MA | tkEE<br>ALELI<br>nGYI<br>Qk | 54% | 32.6 | 52.59907 | Ref | -0.21  | -0.35 | 0.019 | 0.064 | 0.042 | -0.22 | 0.038 | 2050 | 1540 | 1520 | 2200 | 2500 | 2150 | 1880 | 2230 | 888.2 | 2661.5 | 3 | 0.0182 | 6.828 |
| Protein DEK<br>OS=Homo sapiens<br>GN=DEK PE=1 SV=1                                                | 9 DEK_H<br>UMAN,sp<br> Q6AXS3 <br>DEK_RAT,<br>sp Q7TN<br>V0 DEK_<br>MOUSE,tr<br> A5PJQ1 <br>A5PJQ1_B<br>OVIN,tr B<br>4DFG0 B<br>4DFG0_H<br>UMAN,tr <br>B4DN37 <br>B4DN37_<br>HUMAN,t<br>r D2HIB3<br> D2HIB3_<br>AILME,tr <br>D3YVJ6 D<br>3YVJ6_M<br>OUSE,tr <br>D6RDA2 <br>D6RDA2_<br>HUMAN,t<br>r E3VX55<br> E3VX55_      | iLNFL<br>MHP<br>k           | 54% | 30.4 | 50.42202 | Ref | -0.096 | -0.66 | -0.32 | -0.75 | -0.32 | -0.83 | -0.3  | 2000 | 1620 | 1190 | 1690 | 1390 | 1630 | 1190 | 1720 | 574.4 | 1720   | 3 | 0.0038 | 2.186 |

|                                                                 |                                                                                                                                                                                                                                            |             |     |      |          |     |        |       |       |        |       |       |      |       |       |       |       |       |       |       |       |       |        |   |        |       |
|-----------------------------------------------------------------|--------------------------------------------------------------------------------------------------------------------------------------------------------------------------------------------------------------------------------------------|-------------|-----|------|----------|-----|--------|-------|-------|--------|-------|-------|------|-------|-------|-------|-------|-------|-------|-------|-------|-------|--------|---|--------|-------|
| Fumarate hydratase, mitochondrial OS=Sus scrofa GN=FH PE=1 SV=1 | 3 FUMH_PIG,sp P14408 FUMH_RAT,trans C5IWV1 C5IWV1_SHEEP,trans D2H9H6 D2H9H6_AILME,trans E2RGR9 E2RGR9_CANFA,trans F6U5R1 F6U5R1_HORSE,trans F6XCG4 F6XCG4_MONDO,trans Q148D3 Q148D3_BOVIN,trans Q4PNY4 Q4PNY4_CRIGR,trans Q5M964 Q5M964_RA | mPIP VLk    | 53% | 25.7 | 45.74506 | Ref | -0.13  | -0.26 | -0.11 | -0.27  | -0.51 | -0.27 | -0.6 | 8170  | 6480  | 6440  | 8030  | 7920  | 5870  | 7200  | 5700  | 469.3 | 1404.9 | 3 | 0.003  | 2.138 |
| RING finger protein 113A OS=Bos taurus GN=RNF113A PE=2 SV=1     | sp Q67ER4 R113A_BOVIN                                                                                                                                                                                                                      | aVH NPM IQk | 53% | 32.3 | 52.38563 | Ref | -0.005 | -0.02 | -0.08 | -0.072 | 0.23  | -0.11 | 0.09 | 24500 | 21200 | 22700 | 24600 | 27200 | 29200 | 24200 | 27500 | 549.3 | 1645   | 3 | 0.0084 | 5.075 |

|                                                                       |                                                                                                                                                                                                                         |              |     |      |          |     |      |      |      |       |      |      |       |       |       |       |       |       |       |       |       |       |        |   |        |       |
|-----------------------------------------------------------------------|-------------------------------------------------------------------------------------------------------------------------------------------------------------------------------------------------------------------------|--------------|-----|------|----------|-----|------|------|------|-------|------|------|-------|-------|-------|-------|-------|-------|-------|-------|-------|-------|--------|---|--------|-------|
| 60S ribosomal protein L17<br>OS=Homo sapiens<br>GN=RPL17 PE=1<br>SV=3 | 1 RL17_HUMAN,sp P24049 RL17_RAT,sp Q3T025 RL17_BOVIN,sp Q5XTY7 RL17_FELCA,sp Q9CPR4 RL17_MOUSE,tr B4E3C2 B4E3C2_HUMAN,tr B7NZF8 B7NZF8_RABIT,tr D3Z3R2 D3Z3R2_MOUSE,tr D3Z9G9 D3Z9G9_RAT,tr D3ZP66 D3ZP66_RAT,tr D3ZXH6 | nAES<br>nAEL | 53% | 33   | 53.30172 | Ref | 0.23 | 0.15 | 0.46 | 0.009 | 0.46 | 0.06 | 0.3   | 10200 | 10400 | 10700 | 14800 | 12000 | 14300 | 11300 | 13200 | 792.9 | 1583.9 | 2 | 0.0104 | 6.534 |
| Semaphorin-3C<br>OS=Bos taurus<br>GN=SEMA3C PE=2<br>SV=1              | 7MB70 SEM3C_BOVIN,REV_sp O70418 RN112_RAT,REV_sp P05708 HXX1_RAT,REV_sp P17710 HXX1_MOUSE,REV_sp P19367 HXX1_HUMAN,REV_sp P27595 HXX1_BOVIN,REV_sp P56560 AOFB_BOVIN,REV_sp Q2TB90 HKDC1_HUMAN,REV_sp Q4R6N4 CPXC       | IVILR        | 53% | 17.9 | 38.36324 | Ref | 0.33 | 0.25 | 0.31 | -0.18 | 0.11 | 0.23 | 0.094 | 5260  | 5740  | 5900  | 6890  | 5420  | 5780  | 6540  | 5920  | 459.3 | 916.63 | 2 | 0.0121 | 13.14 |

|                                                                            |                                                                                                                                                                                                                     |            |     |      |          |     |       |       |       |       |       |       |       |       |      |      |      |       |      |       |      |       |        |   |        |       |
|----------------------------------------------------------------------------|---------------------------------------------------------------------------------------------------------------------------------------------------------------------------------------------------------------------|------------|-----|------|----------|-----|-------|-------|-------|-------|-------|-------|-------|-------|------|------|------|-------|------|-------|------|-------|--------|---|--------|-------|
| Endoplasmic reticulum resident protein 44 OS=Bos taurus GN=ERP44 PE=2 SV=1 | 2 ERP44_BOVIN,sp Q9BS26 ERP44_HUMAN,sp Q9D1Q6 ERP44_MOUSE,tr A6ML26 A6ML26_CALJA,tr B1AY76 B1AY76_MOUSE,tr B6CVD6 B6CVD6_PIG,tr D2H0F7 D2H0F7_AILME,tr F1M396 F1M396_RA_T,tr F1PQG3 F1PQG3_CANF_A,tr F1SSD2 F1SSD   | qFVFDLHSGk | 53% | 32.9 | 53.13125 | Ref | -0.31 | -0.58 | -0.5  | -0.26 | -0.86 | -0.45 | -0.82 | 12900 | 9000 | 8140 | 9650 | 12500 | 7220 | 10000 | 7710 | 596   | 1785   | 3 | 0.0088 | 4.922 |
| Pseudopodium-enriched atypical kinase 1 OS=Mus musculus GN=Peak1 PE=1 SV=4 | 69Z38 PEAK1_MOUSE,REV_sp Q9H792 PEAK1_HUMAN,REV_tr D2I0Q5 D2I0Q5_AILME,REV_tr D4A563 D4A563_RAT,REV_tr E1B8H0 E1B8H0_BOVIN,REV_tr E2QUM4 E2QUM4_CANFA,REV_tr F1SJ90 F1SJ90_PIG,REV_tr F6QWL8 F6QWL8_CALJA,REV_tr F6 | ILALVk     | 52% | 19.2 | 39.509   | Ref | -0.26 | -0.72 | -0.24 | -0.61 | -0.04 | -0.95 | -0.14 | 2310  | 1680 | 1320 | 2080 | 1770  | 2300 | 1280  | 2220 | 422.3 | 1263.9 | 3 | 0.0206 | 16.27 |

|                                                                                        |                                                                                                         |                                    |     |      |          |     |        |       |       |        |       |       |       |       |       |       |       |       |       |       |       |       |        |   |        |       |
|----------------------------------------------------------------------------------------|---------------------------------------------------------------------------------------------------------|------------------------------------|-----|------|----------|-----|--------|-------|-------|--------|-------|-------|-------|-------|-------|-------|-------|-------|-------|-------|-------|-------|--------|---|--------|-------|
| Uncharacterized protein<br>OS=Callithrix jacchus GN=MLIP<br>PE=4 SV=1                  | REV_tr F7<br>ETD9 F7E<br>TD9_CALJ<br>A                                                                  | vLSA<br>LnSS<br>AK                 | 52% | 30.2 | 50.71617 | Ref | -0.038 | -0.21 | -0.37 | -0.19  | -0.36 | -0.47 | -0.25 | 1490  | 1260  | 1210  | 1220  | 1530  | 1190  | 1150  | 1320  | 647.9 | 1293.8 | 2 | 0.0104 | 8.04  |
| Calpain-2 catalytic subunit OS=Bos taurus GN=CAPN2<br>PE=2 SV=2                        | sp Q27971 CAN2_BOVIN, tr A81F71 A81F71_SH_EEP                                                           | rPTEI<br>cDnP<br>QFIT<br>GGA<br>TR | 52% | 32.3 | 52.63781 | Ref | -0.3   | 0.6   | 0.11  | -0.022 | 0.15  | -0.35 | -0.09 | 2520  | 1780  | 3600  | 2890  | 2900  | 2860  | 2110  | 2500  | 776.4 | 2326.1 | 3 | 0.0163 | 6.999 |
| Synaptonemal complex protein SC65 (Fragment) OS=Rattus norvegicus GN=Leprel4 PE=2 SV=2 | sp Q64375 SC65_RAT, sp Q8K2B0 SC65_MOUSE, tr D4ABF0 D4ABF0_RAT, tr F6W113 MOUSE, tr Q8C112 Q8C112_MOUSE | IFGH<br>VLER                       | 52% | 31.3 | 51.67143 | Ref | -0.076 | -0.18 | 0.006 | -0.28  | 0.008 | 0.004 | -0.14 | 3840  | 3170  | 3190  | 4080  | 3700  | 3930  | 4090  | 3670  | 425.6 | 1273.7 | 3 | 0.0022 | 1.73  |
| Uncharacterized protein OS=Sus scrofa GN=PNP<br>PE=4 SV=1                              | tr F1S8H8 F1S8H8_PIG                                                                                    | wLLS<br>HTk                        | 51% | 29.2 | 49.66269 | Ref | 0.47   | -0.19 | 0.46  | 0.011  | 0.15  | -0.29 | 0.29  | 17200 | 20700 | 14300 | 25100 | 20300 | 19500 | 15000 | 22200 | 498.3 | 1491.9 | 3 | 0.002  | 1.369 |
